# Supplementary material for: Lymphaticovenous Anastomosis Supermicrosurgery Decreases Oxidative Stress and Increases Antioxidant Capacity in the Serum of Lymphedema Patients
Source: PubMed Central journal article supplement (PMC8038828; doi:10.3390/jcm10071540), 2021-04-06
Supplement: jcm-10-01540-s001.pdf [file jcm-10-01540-s001.pdf]

|           |
|-----------|
| Accession |
| P08709    |
| P33151    |
| Q9BXR6    |
| P00441    |
| P98160    |
| Q9UJJ9    |
| P13796    |
| Q9HDC9    |
| P07996    |
| P01034    |
| Q15113    |
| Q9NPH3    |
| Q13740    |
| P02042    |
| P36980    |
| Q9NQ79    |
| P04180    |
| Q9UNW1    |
| P43121    |
| P05109    |
| Q9Y4L1    |
| Q15063    |
| Q99784    |
| P02452    |
| P35908    |
| O14786    |
| P19320    |
| P05154    |
| Q9Y5Y7    |
| O00187    |
| P02746    |
| P00915    |
| P12111    |
| P13591    |
| P04070    |
| P08294    |
| P23470    |
| P61769    |
| P00746    |
| P22891    |
| Q9UGM5    |
| P48740    |
| P04040    |
| P41222    |
| P09172    |
| O00533    |
| Q9UNN8    |
| Q12805    |
| Q92820    |
| Q9UK55    |

|        |
|--------|
| P15169 |
| P13645 |
| P00739 |
| P0C0L5 |
| P14151 |
| P01860 |
| P11226 |
| P06702 |
| P35443 |
| P55058 |
| O43866 |
| P08571 |
| P80108 |
| P02741 |
| P49908 |
| P03951 |
| P60709 |
| O00391 |
| Q9UHG3 |
| P43251 |
| P01859 |
| P04264 |
| Q76LX8 |
| P05062 |
| P17936 |
| Q15485 |
| Q13790 |
| Q92954 |
| P02747 |
| P01876 |
| P49747 |
| P11021 |
| Q6UX71 |
| P32119 |
| P08519 |
| P13727 |
| Q15582 |
| P01591 |
| P08833 |
| B9A064 |
| Q96KN2 |
| P22105 |
| P02763 |
| P05452 |
| Q16610 |
| P20742 |
| P55056 |
| P22352 |
| P00742 |
| P02771 |
| P23142 |
| P01834 |

|        |
|--------|
| P00748 |
| P12259 |
| P35527 |
| P06276 |
| Q08380 |
| P00740 |
| P15144 |
| P02745 |
| O14791 |
| Q96IY4 |
| P20851 |
| P02656 |
| Q04756 |
| P26927 |
| P27169 |
| P10909 |
| Q6UXB8 |
| P16070 |
| O95445 |
| P02743 |
| P02655 |
| P07358 |
| P22792 |
| P04278 |
| P02753 |
| P69905 |
| P02748 |
| P27918 |
| P05156 |
| P02751 |
| Q14520 |
| P00918 |
| P05090 |
| P00736 |
| P01857 |
| P07225 |
| P04275 |
| P09871 |
| PODJI8 |
| Q96PD5 |
| P01019 |
| P02654 |
| O75636 |
| P19652 |
| P08185 |
| P07357 |
| O75882 |
| P01871 |
| P36955 |
| P35542 |
| P10643 |
| P02760 |

|        |
|--------|
| P29622 |
| Q06033 |
| P18428 |
| Q9NZP8 |
| P03952 |
| P13671 |
| P25311 |
| P02649 |
| P02775 |
| P05543 |
| P02652 |
| P35858 |
| P04004 |
| P08697 |
| P68871 |
| P02750 |
| P01008 |
| P51884 |
| P07360 |
| P00734 |
| P06396 |
| P08603 |
| P06681 |
| P04003 |
| P02766 |
| P02787 |
| P19827 |
| P04196 |
| P05155 |
| P06727 |
| P05546 |
| P02749 |
| P01042 |
| P02765 |
| P01031 |
| P43652 |
| P00747 |
| P19823 |
| P02768 |
| P00738 |
| P01011 |
| P04217 |
| P01023 |
| P00450 |
| P00751 |
| Q14624 |
| P01009 |
| P02790 |
| P02774 |
| POCOL4 |
| P02647 |
| P04114 |

|        |
|--------|
| P01024 |
| Q562R1 |
| P13598 |
| Q02325 |
| P0CG38 |
| P0CG39 |
| Q16473 |
| Q15166 |
| P62736 |
| P63267 |
| Q15195 |
| Q6S8J3 |
| A5A3E0 |
| Q9BYX7 |
| P68032 |
| P68133 |
| P63261 |
| Q2TV78 |
| P04220 |

| Description                                                                          | Exp. q-value |
|--------------------------------------------------------------------------------------|--------------|
| Coagulation factor VII OS=Homo sapiens GN=F7 PE=1 SV=1                               | 0            |
| Cadherin-5 OS=Homo sapiens GN=CDH5 PE=1 SV=5                                         | 0            |
| Complement factor H-related protein 5 OS=Homo sapiens GN=CFHR5 PE=1 SV=1             | 0            |
| Superoxide dismutase [Cu-Zn] OS=Homo sapiens GN=SOD1 PE=1 SV=2                       | 0            |
| Basement membrane-specific heparan sulfate proteoglycan core protein OS=Homo sapie   | 0            |
| N-acetylglucosamine-1-phosphotransferase subunit gamma OS=Homo sapiens GN=GNPT       | 0            |
| Plastin-2 OS=Homo sapiens GN=LCP1 PE=1 SV=6                                          | 0            |
| Adipocyte plasma membrane-associated protein OS=Homo sapiens GN=APMAP PE=1 SV=       | 0            |
| Thrombospondin-1 OS=Homo sapiens GN=THBS1 PE=1 SV=2                                  | 0            |
| Cystatin-C OS=Homo sapiens GN=CST3 PE=1 SV=1                                         | 0            |
| Procollagen C-endopeptidase enhancer 1 OS=Homo sapiens GN=PCOLCE PE=1 SV=2           | 0            |
| Interleukin-1 receptor accessory protein OS=Homo sapiens GN=IL1RAP PE=1 SV=2         | 0            |
| CD166 antigen OS=Homo sapiens GN=ALCAM PE=1 SV=2                                     | 0            |
| Hemoglobin subunit delta OS=Homo sapiens GN=HBD PE=1 SV=2                            | 0            |
| Complement factor H-related protein 2 OS=Homo sapiens GN=CFHR2 PE=1 SV=1             | 0            |
| Cartilage acidic protein 1 OS=Homo sapiens GN=CRTAC1 PE=1 SV=2                       | 0            |
| Phosphatidylcholine-sterol acyltransferase OS=Homo sapiens GN=LCAT PE=1 SV=1         | 0            |
| Multiple inositol polyphosphate phosphatase 1 OS=Homo sapiens GN=MINPP1 PE=1 SV=     | 0            |
| Cell surface glycoprotein MUC18 OS=Homo sapiens GN=MCAM PE=1 SV=2                    | 0            |
| Protein S100-A8 OS=Homo sapiens GN=S100A8 PE=1 SV=1                                  | 0.007        |
| Hypoxia up-regulated protein 1 OS=Homo sapiens GN=HYOU1 PE=1 SV=1                    | 0.007        |
| Periostin OS=Homo sapiens GN=POSTN PE=1 SV=2                                         | 0            |
| Noelin OS=Homo sapiens GN=OLFM1 PE=1 SV=4                                            | 0            |
| Collagen alpha-1(I) chain OS=Homo sapiens GN=COL1A1 PE=1 SV=5                        | 0.007        |
| Keratin, type II cytoskeletal 2 epidermal OS=Homo sapiens GN=KRT2 PE=1 SV=2          | 0            |
| Neuropilin-1 OS=Homo sapiens GN=NRP1 PE=1 SV=3                                       | 0            |
| Vascular cell adhesion protein 1 OS=Homo sapiens GN=VCAM1 PE=1 SV=1                  | 0            |
| Plasma serine protease inhibitor OS=Homo sapiens GN=SERPINA5 PE=1 SV=3               | 0            |
| Lymphatic vessel endothelial hyaluronic acid receptor 1 OS=Homo sapiens GN=LYVE1 PE  | 0            |
| Mannan-binding lectin serine protease 2 OS=Homo sapiens GN=MASP2 PE=1 SV=4           | 0            |
| Complement C1q subcomponent subunit B OS=Homo sapiens GN=C1QB PE=1 SV=3              | 0            |
| Carbonic anhydrase 1 OS=Homo sapiens GN=CA1 PE=1 SV=2                                | 0            |
| Collagen alpha-3(VI) chain OS=Homo sapiens GN=COL6A3 PE=1 SV=5                       | 0            |
| Neural cell adhesion molecule 1 OS=Homo sapiens GN=NCAM1 PE=1 SV=3                   | 0            |
| Vitamin K-dependent protein C OS=Homo sapiens GN=PROC PE=1 SV=1                      | 0            |
| Extracellular superoxide dismutase [Cu-Zn] OS=Homo sapiens GN=SOD3 PE=1 SV=2         | 0            |
| Receptor-type tyrosine-protein phosphatase gamma OS=Homo sapiens GN=PTPRG PE=1       | 0.007        |
| Beta-2-microglobulin OS=Homo sapiens GN=B2M PE=1 SV=1                                | 0            |
| Complement factor D OS=Homo sapiens GN=CFD PE=1 SV=5                                 | 0            |
| Vitamin K-dependent protein Z OS=Homo sapiens GN=PROZ PE=1 SV=2                      | 0            |
| Fetuin-B OS=Homo sapiens GN=FETUB PE=1 SV=2                                          | 0            |
| Mannan-binding lectin serine protease 1 OS=Homo sapiens GN=MASP1 PE=1 SV=3           | 0            |
| Catalase OS=Homo sapiens GN=CAT PE=1 SV=3                                            | 0            |
| Prostaglandin-H2 D-isomerase OS=Homo sapiens GN=PTGDS PE=1 SV=1                      | 0            |
| Dopamine beta-hydroxylase OS=Homo sapiens GN=DBH PE=1 SV=3                           | 0            |
| Neural cell adhesion molecule L1-like protein OS=Homo sapiens GN=CHL1 PE=1 SV=4      | 0            |
| Endothelial protein C receptor OS=Homo sapiens GN=PROCR PE=1 SV=1                    | 0.007        |
| EGF-containing fibulin-like extracellular matrix protein 1 OS=Homo sapiens GN=EFEMP1 | 0            |
| Gamma-glutamyl hydrolase OS=Homo sapiens GN=GGH PE=1 SV=2                            | 0            |
| Protein Z-dependent protease inhibitor OS=Homo sapiens GN=SERPINA10 PE=1 SV=1        | 0            |

|                                                                                    |       |
|------------------------------------------------------------------------------------|-------|
| Carboxypeptidase N catalytic chain OS=Homo sapiens GN=CPN1 PE=1 SV=1               | 0     |
| Keratin, type I cytoskeletal 10 OS=Homo sapiens GN=KRT10 PE=1 SV=6                 | 0     |
| Haptoglobin-related protein OS=Homo sapiens GN=HPR PE=2 SV=2                       | 0     |
| Complement C4-B OS=Homo sapiens GN=C4B PE=1 SV=2                                   | 0     |
| L-selectin OS=Homo sapiens GN=SELL PE=1 SV=2                                       | 0     |
| Ig gamma-3 chain C region OS=Homo sapiens GN=IGHG3 PE=1 SV=2                       | 0     |
| Mannose-binding protein C OS=Homo sapiens GN=MBL2 PE=1 SV=2                        | 0     |
| Protein S100-A9 OS=Homo sapiens GN=S100A9 PE=1 SV=1                                | 0.007 |
| Thrombospondin-4 OS=Homo sapiens GN=THBS4 PE=1 SV=2                                | 0     |
| Phospholipid transfer protein OS=Homo sapiens GN=PLTP PE=1 SV=1                    | 0     |
| CD5 antigen-like OS=Homo sapiens GN=CD5L PE=1 SV=1                                 | 0     |
| Monocyte differentiation antigen CD14 OS=Homo sapiens GN=CD14 PE=1 SV=2            | 0     |
| Phosphatidylinositol-glycan-specific phospholipase D OS=Homo sapiens GN=GPLD1 PE=  | 0     |
| C-reactive protein OS=Homo sapiens GN=CRP PE=1 SV=1                                | 0     |
| Selenoprotein P OS=Homo sapiens GN=SEPP1 PE=1 SV=3                                 | 0     |
| Coagulation factor XI OS=Homo sapiens GN=F11 PE=1 SV=1                             | 0     |
| Actin, cytoplasmic 1 OS=Homo sapiens GN=ACTB PE=1 SV=1                             | 0     |
| Sulfhydryl oxidase 1 OS=Homo sapiens GN=QSOX1 PE=1 SV=3                            | 0     |
| Preylcysteine oxidase 1 OS=Homo sapiens GN=PCYOX1 PE=1 SV=3                        | 0     |
| Biotinidase OS=Homo sapiens GN=BTB PE=1 SV=2                                       | 0     |
| Ig gamma-2 chain C region OS=Homo sapiens GN=IGHG2 PE=1 SV=2                       | 0     |
| Keratin, type II cytoskeletal 1 OS=Homo sapiens GN=KRT1 PE=1 SV=6                  | 0     |
| A disintegrin and metalloproteinase with thrombospondin motifs 13 OS=Homo sapiens  | 0     |
| Fructose-bisphosphate aldolase B OS=Homo sapiens GN=ALDOB PE=1 SV=2                | 0.007 |
| Insulin-like growth factor-binding protein 3 OS=Homo sapiens GN=IGFBP3 PE=1 SV=2   | 0     |
| Ficolin-2 OS=Homo sapiens GN=FCN2 PE=1 SV=2                                        | 0     |
| Apolipoprotein F OS=Homo sapiens GN=APOF PE=1 SV=2                                 | 0     |
| Proteoglycan 4 OS=Homo sapiens GN=PRG4 PE=1 SV=2                                   | 0     |
| Complement C1q subcomponent subunit C OS=Homo sapiens GN=C1QC PE=1 SV=3            | 0     |
| Ig alpha-1 chain C region OS=Homo sapiens GN=IGHA1 PE=1 SV=2                       | 0     |
| Cartilage oligomeric matrix protein OS=Homo sapiens GN=COMP PE=1 SV=2              | 0     |
| 78 kDa glucose-regulated protein OS=Homo sapiens GN=HSPA5 PE=1 SV=2                | 0.007 |
| Plexin domain-containing protein 2 OS=Homo sapiens GN=PLXDC2 PE=1 SV=1             | 0     |
| Peroxiredoxin-2 OS=Homo sapiens GN=PRDX2 PE=1 SV=5                                 | 0     |
| Apolipoprotein(a) OS=Homo sapiens GN=LPA PE=1 SV=1                                 | 0     |
| Bone marrow proteoglycan OS=Homo sapiens GN=PRG2 PE=1 SV=2                         | 0     |
| Transforming growth factor-beta-induced protein ig-h3 OS=Homo sapiens GN=TGFBI PE= | 0     |
| Immunoglobulin J chain OS=Homo sapiens GN=JCHAIN PE=1 SV=4                         | 0     |
| Insulin-like growth factor-binding protein 1 OS=Homo sapiens GN=IGFBP1 PE=1 SV=1   | 0     |
| Immunoglobulin lambda-like polypeptide 5 OS=Homo sapiens GN=IGLL5 PE=2 SV=2        | 0     |
| Beta-Ala-His dipeptidase OS=Homo sapiens GN=CNDP1 PE=1 SV=4                        | 0     |
| Tenascin-X OS=Homo sapiens GN=TNXB PE=1 SV=4                                       | 0     |
| Alpha-1-acid glycoprotein 1 OS=Homo sapiens GN=ORM1 PE=1 SV=1                      | 0     |
| Tetranectin OS=Homo sapiens GN=CLEC3B PE=1 SV=3                                    | 0     |
| Extracellular matrix protein 1 OS=Homo sapiens GN=ECM1 PE=1 SV=2                   | 0     |
| Pregnancy zone protein OS=Homo sapiens GN=PZP PE=1 SV=4                            | 0     |
| Apolipoprotein C-IV OS=Homo sapiens GN=APOC4 PE=1 SV=1                             | 0     |
| Glutathione peroxidase 3 OS=Homo sapiens GN=GPX3 PE=1 SV=2                         | 0     |
| Coagulation factor X OS=Homo sapiens GN=F10 PE=1 SV=2                              | 0     |
| Alpha-fetoprotein OS=Homo sapiens GN=AFP PE=1 SV=1                                 | 0     |
| Fibulin-1 OS=Homo sapiens GN=FBLN1 PE=1 SV=4                                       | 0     |
| Ig kappa chain C region OS=Homo sapiens GN=IGKC PE=1 SV=1                          | 0     |

|                                                                         |   |
|-------------------------------------------------------------------------|---|
| Coagulation factor XII OS=Homo sapiens GN=F12 PE=1 SV=3                 | 0 |
| Coagulation factor V OS=Homo sapiens GN=F5 PE=1 SV=4                    | 0 |
| Keratin, type I cytoskeletal 9 OS=Homo sapiens GN=KRT9 PE=1 SV=3        | 0 |
| Cholinesterase OS=Homo sapiens GN=BCHE PE=1 SV=1                        | 0 |
| Galectin-3-binding protein OS=Homo sapiens GN=LGALS3BP PE=1 SV=1        | 0 |
| Coagulation factor IX OS=Homo sapiens GN=F9 PE=1 SV=2                   | 0 |
| Aminopeptidase N OS=Homo sapiens GN=ANPEP PE=1 SV=4                     | 0 |
| Complement C1q subcomponent subunit A OS=Homo sapiens GN=C1QA PE=1 SV=2 | 0 |
| Apolipoprotein L1 OS=Homo sapiens GN=APOL1 PE=1 SV=5                    | 0 |
| Carboxypeptidase B2 OS=Homo sapiens GN=CPB2 PE=1 SV=2                   | 0 |
| C4b-binding protein beta chain OS=Homo sapiens GN=C4BPB PE=1 SV=1       | 0 |
| Apolipoprotein C-III OS=Homo sapiens GN=APOC3 PE=1 SV=1                 | 0 |
| Hepatocyte growth factor activator OS=Homo sapiens GN=HGFA PE=1 SV=1    | 0 |
| Hepatocyte growth factor-like protein OS=Homo sapiens GN=MST1 PE=1 SV=2 | 0 |
| Serum paraoxonase/arylesterase 1 OS=Homo sapiens GN=PON1 PE=1 SV=3      | 0 |
| Clusterin OS=Homo sapiens GN=CLU PE=1 SV=1                              | 0 |
| Peptidase inhibitor 16 OS=Homo sapiens GN=PI16 PE=1 SV=1                | 0 |
| CD44 antigen OS=Homo sapiens GN=CD44 PE=1 SV=3                          | 0 |
| Apolipoprotein M OS=Homo sapiens GN=APOM PE=1 SV=2                      | 0 |
| Serum amyloid P-component OS=Homo sapiens GN=APCS PE=1 SV=2             | 0 |
| Apolipoprotein C-II OS=Homo sapiens GN=APOC2 PE=1 SV=1                  | 0 |
| Complement component C8 beta chain OS=Homo sapiens GN=C8B PE=1 SV=3     | 0 |
| Carboxypeptidase N subunit 2 OS=Homo sapiens GN=CPN2 PE=1 SV=3          | 0 |
| Sex hormone-binding globulin OS=Homo sapiens GN=SHBG PE=1 SV=2          | 0 |
| Retinol-binding protein 4 OS=Homo sapiens GN=RBP4 PE=1 SV=3             | 0 |
| Hemoglobin subunit alpha OS=Homo sapiens GN=HBA1 PE=1 SV=2              | 0 |
| Complement component C9 OS=Homo sapiens GN=C9 PE=1 SV=2                 | 0 |
| Properdin OS=Homo sapiens GN=CFP PE=1 SV=2                              | 0 |
| Complement factor I OS=Homo sapiens GN=CFI PE=1 SV=2                    | 0 |
| Fibronectin OS=Homo sapiens GN=FN1 PE=1 SV=4                            | 0 |
| Hyaluronan-binding protein 2 OS=Homo sapiens GN=HABP2 PE=1 SV=1         | 0 |
| Carbonic anhydrase 2 OS=Homo sapiens GN=CA2 PE=1 SV=2                   | 0 |
| Apolipoprotein D OS=Homo sapiens GN=APOD PE=1 SV=1                      | 0 |
| Complement C1r subcomponent OS=Homo sapiens GN=C1R PE=1 SV=2            | 0 |
| Ig gamma-1 chain C region OS=Homo sapiens GN=IGHG1 PE=1 SV=1            | 0 |
| Vitamin K-dependent protein S OS=Homo sapiens GN=PROS1 PE=1 SV=1        | 0 |
| von Willebrand factor OS=Homo sapiens GN=VWF PE=1 SV=4                  | 0 |
| Complement C1s subcomponent OS=Homo sapiens GN=C1S PE=1 SV=1            | 0 |
| Serum amyloid A-1 protein OS=Homo sapiens GN=SAA1 PE=1 SV=1             | 0 |
| N-acetylmuramoyl-L-alanine amidase OS=Homo sapiens GN=PGLYRP2 PE=1 SV=1 | 0 |
| Angiotensinogen OS=Homo sapiens GN=AGT PE=1 SV=1                        | 0 |
| Apolipoprotein C-I OS=Homo sapiens GN=APOC1 PE=1 SV=1                   | 0 |
| Ficolin-3 OS=Homo sapiens GN=FCN3 PE=1 SV=2                             | 0 |
| Alpha-1-acid glycoprotein 2 OS=Homo sapiens GN=ORM2 PE=1 SV=2           | 0 |
| Corticosteroid-binding globulin OS=Homo sapiens GN=SERPINA6 PE=1 SV=1   | 0 |
| Complement component C8 alpha chain OS=Homo sapiens GN=C8A PE=1 SV=2    | 0 |
| Attractin OS=Homo sapiens GN=ATRNL1 PE=1 SV=2                           | 0 |
| Ig mu chain C region OS=Homo sapiens GN=IGHM PE=1 SV=3                  | 0 |
| Pigment epithelium-derived factor OS=Homo sapiens GN=SERPINF1 PE=1 SV=4 | 0 |
| Serum amyloid A-4 protein OS=Homo sapiens GN=SAA4 PE=1 SV=2             | 0 |
| Complement component C7 OS=Homo sapiens GN=C7 PE=1 SV=2                 | 0 |
| Protein AMBP OS=Homo sapiens GN=AMBP PE=1 SV=1                          | 0 |



|                                                                                        |   |
|----------------------------------------------------------------------------------------|---|
| Kallistatin OS=Homo sapiens GN=SERPINA4 PE=1 SV=3                                      | 0 |
| Inter-alpha-trypsin inhibitor heavy chain H3 OS=Homo sapiens GN=ITIH3 PE=1 SV=2        | 0 |
| Lipopolysaccharide-binding protein OS=Homo sapiens GN=LBP PE=1 SV=3                    | 0 |
| Complement C1r subcomponent-like protein OS=Homo sapiens GN=C1RL PE=1 SV=2             | 0 |
| Plasma kallikrein OS=Homo sapiens GN=KLKB1 PE=1 SV=1                                   | 0 |
| Complement component C6 OS=Homo sapiens GN=C6 PE=1 SV=3                                | 0 |
| Zinc-alpha-2-glycoprotein OS=Homo sapiens GN=AZGP1 PE=1 SV=2                           | 0 |
| Apolipoprotein E OS=Homo sapiens GN=APOE PE=1 SV=1                                     | 0 |
| Platelet basic protein OS=Homo sapiens GN=PPBP PE=1 SV=3                               | 0 |
| Thyroxine-binding globulin OS=Homo sapiens GN=SERPINA7 PE=1 SV=2                       | 0 |
| Apolipoprotein A-II OS=Homo sapiens GN=APOA2 PE=1 SV=1                                 | 0 |
| Insulin-like growth factor-binding protein complex acid labile subunit OS=Homo sapiens | 0 |
| Vitronectin OS=Homo sapiens GN=VTN PE=1 SV=1                                           | 0 |
| Alpha-2-antiplasmin OS=Homo sapiens GN=SERPINF2 PE=1 SV=3                              | 0 |
| Hemoglobin subunit beta OS=Homo sapiens GN=HBB PE=1 SV=2                               | 0 |
| Leucine-rich alpha-2-glycoprotein OS=Homo sapiens GN=LRG1 PE=1 SV=2                    | 0 |
| Antithrombin-III OS=Homo sapiens GN=SERPINC1 PE=1 SV=1                                 | 0 |
| Lumican OS=Homo sapiens GN=LUM PE=1 SV=2                                               | 0 |
| Complement component C8 gamma chain OS=Homo sapiens GN=C8G PE=1 SV=3                   | 0 |
| Prothrombin OS=Homo sapiens GN=F2 PE=1 SV=2                                            | 0 |
| Gelsolin OS=Homo sapiens GN=GSN PE=1 SV=1                                              | 0 |
| Complement factor H OS=Homo sapiens GN=CFH PE=1 SV=4                                   | 0 |
| Complement C2 OS=Homo sapiens GN=C2 PE=1 SV=2                                          | 0 |
| C4b-binding protein alpha chain OS=Homo sapiens GN=C4BPA PE=1 SV=2                     | 0 |
| Transthyretin OS=Homo sapiens GN=TTR PE=1 SV=1                                         | 0 |
| Serotransferrin OS=Homo sapiens GN=TF PE=1 SV=3                                        | 0 |
| Inter-alpha-trypsin inhibitor heavy chain H1 OS=Homo sapiens GN=ITIH1 PE=1 SV=3        | 0 |
| Histidine-rich glycoprotein OS=Homo sapiens GN=HRG PE=1 SV=1                           | 0 |
| Plasma protease C1 inhibitor OS=Homo sapiens GN=SERPING1 PE=1 SV=2                     | 0 |
| Apolipoprotein A-IV OS=Homo sapiens GN=APOA4 PE=1 SV=3                                 | 0 |
| Heparin cofactor 2 OS=Homo sapiens GN=SERPIND1 PE=1 SV=3                               | 0 |
| Beta-2-glycoprotein 1 OS=Homo sapiens GN=APOH PE=1 SV=3                                | 0 |
| Kininogen-1 OS=Homo sapiens GN=KNG1 PE=1 SV=2                                          | 0 |
| Alpha-2-HS-glycoprotein OS=Homo sapiens GN=AHSG PE=1 SV=1                              | 0 |
| Complement C5 OS=Homo sapiens GN=C5 PE=1 SV=4                                          | 0 |
| Afamin OS=Homo sapiens GN=AFM PE=1 SV=1                                                | 0 |
| Plasminogen OS=Homo sapiens GN=PLG PE=1 SV=2                                           | 0 |
| Inter-alpha-trypsin inhibitor heavy chain H2 OS=Homo sapiens GN=ITIH2 PE=1 SV=2        | 0 |
| Serum albumin OS=Homo sapiens GN=ALB PE=1 SV=2                                         | 0 |
| Haptoglobin OS=Homo sapiens GN=HP PE=1 SV=1                                            | 0 |
| Alpha-1-antichymotrypsin OS=Homo sapiens GN=SERPINA3 PE=1 SV=2                         | 0 |
| Alpha-1B-glycoprotein OS=Homo sapiens GN=A1BG PE=1 SV=4                                | 0 |
| Alpha-2-macroglobulin OS=Homo sapiens GN=A2M PE=1 SV=3                                 | 0 |
| Ceruloplasmin OS=Homo sapiens GN=CP PE=1 SV=1                                          | 0 |
| Complement factor B OS=Homo sapiens GN=CFB PE=1 SV=2                                   | 0 |
| Inter-alpha-trypsin inhibitor heavy chain H4 OS=Homo sapiens GN=ITIH4 PE=1 SV=4        | 0 |
| Alpha-1-antitrypsin OS=Homo sapiens GN=SERPINA1 PE=1 SV=3                              | 0 |
| Hemopexin OS=Homo sapiens GN=HPX PE=1 SV=2                                             | 0 |
| Vitamin D-binding protein OS=Homo sapiens GN=GC PE=1 SV=1                              | 0 |
| Complement C4-A OS=Homo sapiens GN=C4A PE=1 SV=2                                       | 0 |
| Apolipoprotein A-I OS=Homo sapiens GN=APOA1 PE=1 SV=1                                  | 0 |
| Apolipoprotein B-100 OS=Homo sapiens GN=APOB PE=1 SV=2                                 | 0 |

|                                                                                   |       |
|-----------------------------------------------------------------------------------|-------|
| Complement C3 OS=Homo sapiens GN=C3 PE=1 SV=2                                     | 0     |
| Beta-actin-like protein 2 OS=Homo sapiens GN=ACTBL2 PE=1 SV=2                     | 0     |
| Intercellular adhesion molecule 2 OS=Homo sapiens GN=ICAM2 PE=1 SV=2              | 0.007 |
| Plasminogen-like protein B OS=Homo sapiens GN=PLGLB1 PE=3 SV=1                    | 0     |
| POTE ankyrin domain family member I OS=Homo sapiens GN=POTEI PE=3 SV=1            | 0.007 |
| POTE ankyrin domain family member J OS=Homo sapiens GN=POTEJ PE=3 SV=1            | 0.007 |
| Putative tenascin-XA OS=Homo sapiens GN=TNXA PE=5 SV=2                            | 0.007 |
| Serum paraoxonase/lactonase 3 OS=Homo sapiens GN=PON3 PE=1 SV=3                   | 0     |
| Actin, aortic smooth muscle OS=Homo sapiens GN=ACTA2 PE=1 SV=1                    | 0     |
| Actin, gamma-enteric smooth muscle OS=Homo sapiens GN=ACTG2 PE=1 SV=1             | 0     |
| Plasminogen-like protein A OS=Homo sapiens GN=PLGLA PE=2 SV=1                     | 0     |
| POTE ankyrin domain family member E OS=Homo sapiens GN=POTEE PE=1 SV=3            | 0     |
| POTE ankyrin domain family member F OS=Homo sapiens GN=POTEF PE=1 SV=2            | 0     |
| Putative beta-actin-like protein 3 OS=Homo sapiens GN=POTEKP PE=5 SV=1            | 0     |
| Actin, alpha cardiac muscle 1 OS=Homo sapiens GN=ACTC1 PE=1 SV=1                  | 0     |
| Actin, alpha skeletal muscle OS=Homo sapiens GN=ACTA1 PE=1 SV=1                   | 0     |
| Actin, cytoplasmic 2 OS=Homo sapiens GN=ACTG1 PE=1 SV=1                           | 0     |
| Putative macrophage stimulating 1-like protein OS=Homo sapiens GN=MST1L PE=2 SV=2 | 0     |
| Ig mu heavy chain disease protein OS=Homo sapiens PE=1 SV=1                       | 0     |

| Coverage    | #Peptides | #PSMs | #Unique Peptides | #Protein Groups | MW [kDa] | Score A Mascot |
|-------------|-----------|-------|------------------|-----------------|----------|----------------|
| 7.081545064 | 2         | 2     | 2                | 1               | 51.6     | 34             |
| 3.698979592 | 2         | 2     | 2                | 1               | 87.5     | 51             |
| 6.502636204 | 3         | 3     | 2                | 1               | 64.4     | 46             |
| 14.28571429 | 2         | 2     | 2                | 1               | 15.9     | 52             |
| 0.72876338  | 3         | 3     | 3                | 1               | 468.5    | 77             |
| 10.81967213 | 2         | 2     | 2                | 1               | 34       | 122            |
| 7.177033493 | 4         | 4     | 4                | 1               | 70.2     | 86             |
| 6.971153846 | 3         | 3     | 3                | 1               | 46.5     | 62             |
| 3.931623932 | 4         | 4     | 4                | 1               | 129.3    | 50             |
| 24.65753425 | 3         | 5     | 3                | 1               | 15.8     | 145            |
| 9.799554566 | 3         | 3     | 3                | 1               | 47.9     | 82             |
| 4.736842105 | 3         | 3     | 3                | 1               | 65.4     | 61             |
| 4.288164666 | 2         | 2     | 2                | 1               | 65.1     | 51             |
| 52.38095238 | 7         | 15    | 2                | 1               | 16       | 508            |
| 11.48148148 | 3         | 5     | 2                | 1               | 30.6     | 114            |
| 10.13615734 | 5         | 5     | 5                | 1               | 71.4     | 151            |
| 14.54545455 | 4         | 8     | 4                | 1               | 49.5     | 161            |
| 7.802874743 | 3         | 3     | 3                | 1               | 55       | 66             |
| 7.120743034 | 4         | 5     | 4                | 1               | 71.6     | 114            |
| 15.05376344 | 2         | 2     | 2                | 1               | 10.8     | 60             |
| 1.701701702 | 2         | 2     | 2                | 1               | 111.3    | 26             |
| 2.870813397 | 3         | 3     | 3                | 1               | 93.3     | 49             |
| 3.917525773 | 2         | 2     | 2                | 1               | 55.3     | 43             |
| 1.43442623  | 2         | 4     | 2                | 1               | 138.9    | 30             |
| 9.85915493  | 5         | 6     | 4                | 1               | 65.4     | 113            |
| 3.683640303 | 3         | 3     | 3                | 1               | 103.1    | 50             |
| 8.525033829 | 6         | 6     | 6                | 1               | 81.2     | 124            |
| 16.25615764 | 6         | 10    | 6                | 1               | 45.6     | 205            |
| 8.074534161 | 3         | 3     | 3                | 1               | 35.2     | 79             |
| 7.288629738 | 4         | 4     | 4                | 1               | 75.7     | 94             |
| 20.55335968 | 4         | 7     | 4                | 1               | 26.7     | 242            |
| 24.13793103 | 5         | 8     | 5                | 1               | 28.9     | 265            |
| 2.644003777 | 6         | 6     | 6                | 1               | 343.5    | 148            |
| 6.177156177 | 5         | 6     | 5                | 1               | 94.5     | 139            |
| 5.856832972 | 2         | 8     | 2                | 1               | 52       | 88             |
| 12.08333333 | 2         | 4     | 2                | 1               | 25.8     | 84             |
| 1.176470588 | 2         | 2     | 2                | 1               | 161.9    | 50             |
| 16.80672269 | 2         | 3     | 2                | 1               | 13.7     | 109            |
| 30.83003953 | 5         | 8     | 5                | 1               | 27       | 148            |
| 14.25       | 5         | 6     | 5                | 1               | 44.7     | 106            |
| 15.44502618 | 5         | 8     | 5                | 1               | 42       | 177            |
| 14.16309013 | 9         | 12    | 8                | 1               | 79.2     | 241            |
| 7.020872865 | 3         | 3     | 3                | 1               | 59.7     | 47             |
| 13.15789474 | 2         | 2     | 2                | 1               | 21       | 66             |
| 17.17990276 | 8         | 9     | 8                | 1               | 69       | 150            |
| 7.201986755 | 7         | 7     | 7                | 1               | 135      | 92             |
| 7.56302521  | 2         | 2     | 2                | 1               | 26.7     | 21             |
| 9.53346856  | 4         | 8     | 4                | 1               | 54.6     | 135            |
| 16.35220126 | 5         | 5     | 5                | 1               | 35.9     | 104            |
| 16.66666667 | 6         | 7     | 6                | 1               | 50.7     | 98             |

|             |    |     |    |   |       |       |
|-------------|----|-----|----|---|-------|-------|
| 22.48908297 | 8  | 14  | 8  | 1 | 52.3  | 207   |
| 5.136986301 | 3  | 3   | 3  | 1 | 58.8  | 68    |
| 36.20689655 | 13 | 62  | 3  | 1 | 39    | 1443  |
| 62.3853211  | 85 | 433 | 3  | 1 | 192.6 | 11605 |
| 8.870967742 | 3  | 4   | 3  | 1 | 42.2  | 117   |
| 30.76923077 | 9  | 23  | 3  | 1 | 41.3  | 685   |
| 20.96774194 | 5  | 8   | 5  | 1 | 26.1  | 211   |
| 14.03508772 | 2  | 2   | 2  | 1 | 13.2  | 39    |
| 7.180020812 | 5  | 5   | 2  | 1 | 105.8 | 116   |
| 12.1703854  | 5  | 5   | 5  | 1 | 54.7  | 137   |
| 14.4092219  | 4  | 4   | 4  | 1 | 38.1  | 105   |
| 22.13333333 | 6  | 8   | 6  | 1 | 40.1  | 129   |
| 19.04761905 | 12 | 16  | 12 | 1 | 92.3  | 339   |
| 20.08928571 | 4  | 5   | 4  | 1 | 25    | 83    |
| 6.56167979  | 3  | 5   | 3  | 1 | 43.2  | 108   |
| 19.36       | 11 | 11  | 11 | 1 | 70.1  | 209   |
| 16.53333333 | 5  | 5   | 5  | 1 | 41.7  | 77    |
| 10.84337349 | 6  | 7   | 6  | 1 | 82.5  | 174   |
| 10.2970297  | 5  | 6   | 5  | 1 | 56.6  | 92    |
| 18.96869245 | 8  | 16  | 8  | 1 | 61.1  | 435   |
| 32.20858896 | 8  | 23  | 3  | 1 | 35.9  | 575   |
| 20.1863354  | 12 | 20  | 11 | 1 | 66    | 421   |
| 1.681850035 | 2  | 2   | 2  | 1 | 153.5 | 62    |
| 9.065934066 | 2  | 2   | 2  | 1 | 39.4  | 28    |
| 27.14776632 | 7  | 11  | 7  | 1 | 31.7  | 167   |
| 9.584664537 | 3  | 4   | 3  | 1 | 34    | 110   |
| 11.65644172 | 3  | 7   | 3  | 1 | 35.4  | 245   |
| 6.98005698  | 11 | 13  | 11 | 1 | 151   | 180   |
| 25.30612245 | 5  | 15  | 5  | 1 | 25.8  | 368   |
| 43.3427762  | 10 | 18  | 5  | 1 | 37.6  | 422   |
| 14.00264201 | 8  | 12  | 5  | 1 | 82.8  | 363   |
| 2.44648318  | 2  | 2   | 2  | 1 | 72.3  | 65    |
| 8.695652174 | 4  | 5   | 4  | 1 | 59.5  | 78    |
| 23.23232323 | 4  | 5   | 4  | 1 | 21.9  | 73    |
| 28.75989446 | 14 | 21  | 14 | 1 | 501   | 498   |
| 23.87387387 | 4  | 8   | 4  | 1 | 25.2  | 194   |
| 6.588579795 | 5  | 7   | 5  | 1 | 74.6  | 122   |
| 27.04402516 | 4  | 6   | 4  | 1 | 18.1  | 188   |
| 15.44401544 | 4  | 11  | 4  | 1 | 27.9  | 269   |
| 26.63551402 | 4  | 15  | 2  | 1 | 23    | 448   |
| 16.765286   | 7  | 11  | 7  | 1 | 56.7  | 222   |
| 0.942951438 | 3  | 3   | 3  | 1 | 457.9 | 50    |
| 44.7761194  | 8  | 46  | 5  | 1 | 23.5  | 1059  |
| 32.17821782 | 6  | 21  | 6  | 1 | 22.5  | 578   |
| 30.37037037 | 14 | 21  | 14 | 1 | 60.6  | 432   |
| 15.38461538 | 19 | 35  | 14 | 1 | 163.8 | 815   |
| 27.55905512 | 4  | 9   | 4  | 1 | 14.5  | 223   |
| 25.66371681 | 5  | 7   | 5  | 1 | 25.5  | 166   |
| 15.77868852 | 7  | 15  | 7  | 1 | 54.7  | 325   |
| 1.97044335  | 2  | 4   | 2  | 1 | 68.6  | 130   |
| 15.93172119 | 8  | 12  | 8  | 1 | 77.2  | 278   |
| 80.18867925 | 5  | 24  | 5  | 1 | 11.6  | 755   |

|             |    |    |    |   |       |      |
|-------------|----|----|----|---|-------|------|
| 16.42276423 | 8  | 9  | 8  | 1 | 67.7  | 145  |
| 9.622302158 | 22 | 26 | 22 | 1 | 251.5 | 521  |
| 20.86677368 | 11 | 16 | 11 | 1 | 62    | 514  |
| 16.94352159 | 10 | 13 | 10 | 1 | 68.4  | 320  |
| 28.03418803 | 14 | 22 | 14 | 1 | 65.3  | 522  |
| 26.68112798 | 10 | 18 | 10 | 1 | 51.7  | 428  |
| 3.929679421 | 4  | 5  | 4  | 1 | 109.5 | 95   |
| 23.26530612 | 4  | 5  | 4  | 1 | 26    | 318  |
| 21.35678392 | 10 | 19 | 10 | 1 | 43.9  | 284  |
| 15.13002364 | 5  | 11 | 5  | 1 | 48.4  | 293  |
| 47.22222222 | 9  | 17 | 9  | 1 | 28.3  | 328  |
| 58.58585859 | 6  | 31 | 6  | 1 | 10.8  | 817  |
| 20.91603053 | 11 | 17 | 11 | 1 | 70.6  | 348  |
| 27.56680731 | 13 | 17 | 13 | 1 | 80.3  | 319  |
| 39.15492958 | 10 | 27 | 10 | 1 | 39.7  | 727  |
| 30.73496659 | 13 | 36 | 13 | 1 | 52.5  | 863  |
| 16.1987041  | 6  | 10 | 6  | 1 | 49.4  | 225  |
| 3.908355795 | 3  | 5  | 3  | 1 | 81.5  | 99   |
| 51.06382979 | 8  | 17 | 8  | 1 | 21.2  | 346  |
| 30.94170404 | 9  | 22 | 9  | 1 | 25.4  | 602  |
| 49.5049505  | 4  | 23 | 4  | 1 | 11.3  | 733  |
| 38.07106599 | 16 | 34 | 16 | 1 | 67    | 768  |
| 31.74311927 | 13 | 21 | 13 | 1 | 60.5  | 566  |
| 28.10945274 | 8  | 11 | 8  | 1 | 43.8  | 383  |
| 71.64179104 | 10 | 40 | 10 | 1 | 23    | 1271 |
| 69.71830986 | 7  | 17 | 7  | 1 | 15.2  | 454  |
| 33.63148479 | 19 | 51 | 19 | 1 | 63.1  | 1245 |
| 24.30703625 | 9  | 17 | 9  | 1 | 51.2  | 299  |
| 34.47684391 | 17 | 46 | 17 | 1 | 65.7  | 1405 |
| 21.54233026 | 37 | 57 | 37 | 1 | 262.5 | 827  |
| 17.67857143 | 9  | 25 | 9  | 1 | 62.6  | 400  |
| 7.307692308 | 2  | 2  | 2  | 1 | 29.2  | 62   |
| 26.45502646 | 5  | 19 | 5  | 1 | 21.3  | 436  |
| 40.9929078  | 22 | 39 | 20 | 1 | 80.1  | 1077 |
| 41.81818182 | 10 | 37 | 5  | 1 | 36.1  | 924  |
| 31.80473373 | 17 | 37 | 17 | 1 | 75.1  | 563  |
| 14.14859581 | 33 | 38 | 33 | 1 | 309.1 | 710  |
| 34.73837209 | 18 | 47 | 17 | 1 | 76.6  | 1161 |
| 27.86885246 | 2  | 4  | 2  | 1 | 13.5  | 201  |
| 40.45138889 | 13 | 39 | 13 | 1 | 62.2  | 1153 |
| 30.72164948 | 10 | 38 | 10 | 1 | 53.1  | 1198 |
| 37.34939759 | 7  | 28 | 7  | 1 | 9.3   | 611  |
| 39.13043478 | 8  | 17 | 8  | 1 | 32.9  | 522  |
| 43.78109453 | 8  | 37 | 5  | 1 | 23.6  | 906  |
| 31.60493827 | 10 | 39 | 10 | 1 | 45.1  | 976  |
| 25.85616438 | 12 | 26 | 12 | 1 | 65.1  | 694  |
| 14.06578027 | 18 | 47 | 18 | 1 | 158.4 | 1168 |
| 37.38938053 | 15 | 52 | 15 | 1 | 49.3  | 1063 |
| 49.5215311  | 17 | 46 | 17 | 1 | 46.3  | 1385 |
| 27.69230769 | 4  | 15 | 4  | 1 | 14.7  | 286  |
| 38.79003559 | 26 | 54 | 26 | 1 | 93.5  | 1347 |
| 45.73863636 | 12 | 70 | 12 | 1 | 39    | 2290 |

|             |     |     |     |   |       |       |
|-------------|-----|-----|-----|---|-------|-------|
| 48.94613583 | 17  | 36  | 17  | 1 | 48.5  | 708   |
| 22.92134831 | 17  | 39  | 17  | 1 | 99.8  | 567   |
| 8.316008316 | 4   | 4   | 4   | 1 | 53.4  | 54    |
| 16.42710472 | 7   | 11  | 5   | 1 | 53.5  | 272   |
| 41.06583072 | 24  | 51  | 24  | 1 | 71.3  | 1129  |
| 29.87152034 | 27  | 59  | 27  | 1 | 104.7 | 1308  |
| 48.32214765 | 14  | 45  | 14  | 1 | 34.2  | 1252  |
| 70.03154574 | 22  | 77  | 22  | 1 | 36.1  | 2172  |
| 25          | 3   | 5   | 3   | 1 | 13.9  | 111   |
| 40.48192771 | 14  | 23  | 14  | 1 | 46.3  | 698   |
| 64          | 8   | 63  | 8   | 1 | 11.2  | 1059  |
| 37.19008264 | 17  | 42  | 17  | 1 | 66    | 1113  |
| 40.37656904 | 15  | 74  | 15  | 1 | 54.3  | 1736  |
| 47.25050916 | 19  | 48  | 19  | 1 | 54.5  | 1361  |
| 93.19727891 | 11  | 28  | 6   | 1 | 16    | 891   |
| 43.80403458 | 13  | 33  | 13  | 1 | 38.2  | 1126  |
| 50          | 27  | 121 | 27  | 1 | 52.6  | 2817  |
| 43.19526627 | 14  | 66  | 14  | 1 | 38.4  | 1580  |
| 49.00990099 | 7   | 22  | 7   | 1 | 22.3  | 573   |
| 55.14469453 | 26  | 136 | 26  | 1 | 70    | 4429  |
| 35.42199488 | 30  | 84  | 30  | 1 | 85.6  | 2635  |
| 40.04874086 | 40  | 125 | 37  | 1 | 139   | 2858  |
| 32.18085106 | 22  | 64  | 22  | 1 | 83.2  | 1347  |
| 46.73366834 | 24  | 123 | 24  | 1 | 67    | 2580  |
| 65.30612245 | 12  | 77  | 12  | 1 | 15.9  | 2450  |
| 54.7277937  | 37  | 102 | 37  | 1 | 77    | 2581  |
| 37.65093304 | 25  | 141 | 25  | 1 | 101.3 | 3803  |
| 36.95238095 | 17  | 84  | 17  | 1 | 59.5  | 2105  |
| 41.2        | 20  | 103 | 20  | 1 | 55.1  | 2356  |
| 75.25252525 | 32  | 148 | 32  | 1 | 45.4  | 3409  |
| 38.0761523  | 18  | 69  | 18  | 1 | 57    | 1364  |
| 48.69565217 | 15  | 109 | 15  | 1 | 38.3  | 2291  |
| 43.94409938 | 30  | 157 | 30  | 1 | 71.9  | 4039  |
| 49.86376022 | 11  | 149 | 11  | 1 | 39.3  | 4336  |
| 35.50119332 | 52  | 128 | 52  | 1 | 188.2 | 3079  |
| 51.0851419  | 30  | 129 | 30  | 1 | 69    | 3424  |
| 61.85185185 | 45  | 162 | 45  | 1 | 90.5  | 4258  |
| 46.93446089 | 38  | 217 | 38  | 1 | 106.4 | 5469  |
| 76.68308703 | 50  | 438 | 50  | 1 | 69.3  | 9831  |
| 54.67980296 | 21  | 138 | 11  | 1 | 45.2  | 2919  |
| 50.59101655 | 19  | 201 | 19  | 1 | 47.6  | 6103  |
| 42.62626263 | 15  | 132 | 15  | 1 | 54.2  | 3098  |
| 61.46540027 | 63  | 308 | 58  | 1 | 163.2 | 8279  |
| 58.87323944 | 42  | 277 | 42  | 1 | 122.1 | 7772  |
| 48.56020942 | 35  | 168 | 35  | 1 | 85.5  | 4099  |
| 48.49462366 | 36  | 213 | 36  | 1 | 103.3 | 4735  |
| 63.15789474 | 25  | 185 | 25  | 1 | 46.7  | 3842  |
| 64.06926407 | 24  | 320 | 24  | 1 | 51.6  | 9302  |
| 80.16877637 | 32  | 303 | 32  | 1 | 52.9  | 8068  |
| 63.18807339 | 86  | 429 | 4   | 1 | 192.7 | 11495 |
| 83.52059925 | 31  | 466 | 31  | 1 | 30.8  | 11539 |
| 54.72277011 | 222 | 782 | 222 | 1 | 515.3 | 19592 |

|             |     |      |     |   |       |       |
|-------------|-----|------|-----|---|-------|-------|
| 81.53938665 | 129 | 1607 | 129 | 1 | 187   | 44146 |
| 7.180851064 | 2   | 2    | 2   | 1 | 42    | 25    |
| 8           | 2   | 2    | 2   | 1 | 30.6  | 18    |
| 18.75       | 2   | 16   | 2   | 1 | 11    | 353   |
| 2.23255814  | 2   | 2    | 2   | 1 | 121.2 | 44    |
| 2.312138728 | 2   | 2    | 2   | 1 | 117.3 | 44    |
| 8.038585209 | 2   | 2    | 2   | 1 | 33.7  | 47    |
| 4.519774011 | 2   | 5    | 2   | 1 | 39.6  | 85    |
| 10.0795756  | 3   | 3    | 3   | 1 | 42    | 49    |
| 10.10638298 | 3   | 3    | 3   | 1 | 41.9  | 49    |
| 16.66666667 | 3   | 8    | 3   | 1 | 10.9  | 136   |
| 3.720930233 | 3   | 3    | 3   | 1 | 121.3 | 50    |
| 3.720930233 | 3   | 3    | 3   | 1 | 121.4 | 50    |
| 10.66666667 | 3   | 3    | 3   | 1 | 42    | 50    |
| 12.99734748 | 4   | 4    | 4   | 1 | 42    | 64    |
| 12.99734748 | 4   | 4    | 4   | 1 | 42    | 64    |
| 16.53333333 | 5   | 5    | 5   | 1 | 41.8  | 77    |
| 11.32867133 | 5   | 8    | 5   | 1 | 79.6  | 138   |
| 26.59846547 | 9   | 33   | 9   | 1 | 43    | 693   |

| Annotated Sequence           | Modifications                           | # Protein G | # Proteins |
|------------------------------|-----------------------------------------|-------------|------------|
| [K].IHVDPENFR.[L]            | N-Term(iTRAQ4plex)                      | 2           | 2          |
| [K].vVAGVANALAHk.[Y]         | N-Term(iTRAQ4plex); K12(iTRAQ4plex)     | 2           | 2          |
| [K].vVAGVANALAHk.[Y]         | N-Term(iTRAQ4plex); K12(iTRAQ4plex)     | 2           | 2          |
| [K].vVAGVANALAHk.[Y]         | N-Term(iTRAQ4plex); K12(iTRAQ4plex)     | 2           | 2          |
| [K].vVAGVANALAHk.[Y]         | K12(iTRAQ4plex)                         | 2           | 2          |
| [M].vHLTPEEK.[TS]            | N-Term(iTRAQ4plex); K8(iTRAQ4plex)      | 2           | 2          |
| [R].ILVVYPWTQR.[F]           | N-Term(iTRAQ4plex)                      | 2           | 5          |
| [R].ILVVYPWTQR.[F]           | N-Term(iTRAQ4plex)                      | 2           | 5          |
| [K].vLGAFSDDLHLADNLk.[G]     | N-Term(iTRAQ4plex); K16(iTRAQ4plex)     | 2           | 2          |
| [K].IHVDPENFR.[L]            | N-Term(iTRAQ4plex)                      | 2           | 2          |
| [K].tAVNALWGk.[V]            | N-Term(iTRAQ4plex); K9(iTRAQ4plex)      | 1           | 1          |
| [K].IHVDPENFR.[L]            | N-Term(iTRAQ4plex)                      | 2           | 2          |
| [K].vVAGVANALAHk.[Y]         | K12(iTRAQ4plex)                         | 2           | 2          |
| [R].LLVVYPWTQR.[F]           |                                         | 2           | 5          |
| [K].vNVDVAVGGEALGR.[L]       | N-Term(iTRAQ4plex)                      | 1           | 1          |
| [K].ANPTVTLFPPSSEELQANK.[A]  | K19(iTRAQ4plex)                         | 1           | 2          |
| [K].yAASSYLSLTPEQWk.[S]      | N-Term(iTRAQ4plex); K15(iTRAQ4plex)     | 3           | 6          |
| [K].yAASSYLSLTPEQWk.[S]      | N-Term(iTRAQ4plex); K15(iTRAQ4plex)     | 3           | 6          |
| [K].aNPVTTLFPPSSEELQANK.[A]  | N-Term(iTRAQ4plex); K19(iTRAQ4plex)     | 1           | 2          |
| [K].aNPVTTLFPPSSEELQANK.[A]  | N-Term(iTRAQ4plex); K19(iTRAQ4plex)     | 1           | 2          |
| [RK].sYScQVTHEGSTVEK.[T]     | N-Term(iTRAQ4plex); C4(Carbamidomethyl) | 2           | 5          |
| [RK].sYScQVTHEGSTVEK.[T]     | N-Term(iTRAQ4plex); C4(Carbamidomethyl) | 2           | 5          |
| [K].ANPTVTLFPPSSEELQANK.[A]  | K19(iTRAQ4plex)                         | 1           | 2          |
| [K].ANPTVTLFPPSSEELQANK.[A]  | K19(iTRAQ4plex)                         | 1           | 2          |
| [RK].sYScQVTHEGSTVEK.[T]     | N-Term(iTRAQ4plex); C4(Carbamidomethyl) | 2           | 5          |
| [K].vTVLGQPk.[A]             | N-Term(iTRAQ4plex); K8(iTRAQ4plex)      | 1           | 1          |
| [K].vTVLGQPk.[A]             | N-Term(iTRAQ4plex); K8(iTRAQ4plex)      | 1           | 1          |
| [K].vTVLGQPk.[A]             | N-Term(iTRAQ4plex); K8(iTRAQ4plex)      | 1           | 1          |
| [RK].sYScQVTHEGSTVEK.[T]     | N-Term(iTRAQ4plex); C4(Carbamidomethyl) | 2           | 5          |
| [K].yAASSYLSLTPEQWk.[S]      | N-Term(iTRAQ4plex); K15(iTRAQ4plex)     | 3           | 6          |
| [K].eQQcVImAENR.[K]          | N-Term(iTRAQ4plex); C4(Carbamidomethyl) | 1           | 2          |
| [K].eQQcVImAENR.[K]          | N-Term(iTRAQ4plex); C4(Carbamidomethyl) | 1           | 2          |
| [K].eQQcVImAENR.[K]          | N-Term(iTRAQ4plex); C4(Carbamidomethyl) | 1           | 2          |
| [K].eQQcVImAENR.[K]          | N-Term(iTRAQ4plex); C4(Carbamidomethyl) | 1           | 2          |
| [K].eQQcVImAENR.[K]          | N-Term(iTRAQ4plex); C4(Carbamidomethyl) | 1           | 2          |
| [K].eQQcVImAENR.[K]          | N-Term(iTRAQ4plex); C4(Carbamidomethyl) | 1           | 2          |
| [R].aFQYHsk.[E]              | N-Term(iTRAQ4plex); K7(iTRAQ4plex)      | 1           | 3          |
| [K].EQQcVImAENR.[K]          | C4(Carbamidomethyl)                     | 1           | 2          |
| [R].aFQYHsk.[E]              | N-Term(iTRAQ4plex); K7(iTRAQ4plex)      | 1           | 3          |
| [R].aFQYHsk.[E]              | N-Term(iTRAQ4plex); K7(iTRAQ4plex)      | 1           | 3          |
| [K].EQQcVImAENR.[K]          | C4(Carbamidomethyl)                     | 1           | 2          |
| [K].eQQcVImAENR.[K]          | N-Term(iTRAQ4plex); C4(Carbamidomethyl) | 1           | 2          |
| [R].aFQYHsk.[E]              | N-Term(iTRAQ4plex); K7(iTRAQ4plex)      | 1           | 3          |
| [K].eQQcVImAENR.[K]          | N-Term(iTRAQ4plex); C4(Carbamidomethyl) | 1           | 2          |
| [R].aFQYHsk.[E]              | N-Term(iTRAQ4plex); K7(iTRAQ4plex)      | 1           | 3          |
| [R].fFGHGAEDSLADQAANEWGR.[S] | N-Term(iTRAQ4plex)                      | 1           | 1          |
| [R].fFGHGAEDSLADQAANEWGR.[S] | N-Term(iTRAQ4plex)                      | 1           | 1          |
| [R].sFFSFLGEAFDGR.[D]        | N-Term(iTRAQ4plex)                      | 1           | 2          |
| [R].fFGHGAEDSLADQAANEWGR.[S] | N-Term(iTRAQ4plex)                      | 1           | 1          |
| [RK].iDVcPENAEVTLTDFR.[A]    | N-Term(iTRAQ4plex); C4(Carbamidomethyl) | 2           | 2          |



|                                    |                                |   |    |
|------------------------------------|--------------------------------|---|----|
| [R].wFLQHRPQVGYIR.[V]              | N-Term(iTRAQ4plex)             | 2 | 2  |
| [K].dVDIDSYPDEELPcSAR.[N]          | N-Term(iTRAQ4plex); C14(Carbar | 1 | 1  |
| [R].nTIAEcQAcGPLk.[F]              | N-Term(iTRAQ4plex); C6(Carbam  | 1 | 1  |
| [R].aVAEPGIQLk.[A]                 | N-Term(iTRAQ4plex); K10(iTRAQ  | 2 | 2  |
| [R].rHPQLAVSVILR.[V]               | N-Term(iTRAQ4plex)             | 1 | 1  |
| [R].rHPQLAVSVILR.[V]               | N-Term(iTRAQ4plex)             | 1 | 1  |
| [R].rHPQLAVSVILR.[V]               | N-Term(iTRAQ4plex)             | 1 | 1  |
| [R].hPQLAVSVILR.[V]                | N-Term(iTRAQ4plex)             | 1 | 1  |
| [K].INHGILYDEEK.[Y]                | K11(iTRAQ4plex)                | 2 | 2  |
| [K].iNHGILYDEEK.[Y]                | N-Term(iTRAQ4plex); K11(iTRAQ  | 2 | 2  |
| [K].iNHGILYDEEK.[Y]                | N-Term(iTRAQ4plex); K11(iTRAQ  | 2 | 2  |
| [R].sTISAEk.[C]                    | N-Term(iTRAQ4plex); K7(iTRAQ4  | 1 | 1  |
| [R].iTcAEEGWSPTPk.[C]              | N-Term(iTRAQ4plex); C3(Carbam  | 1 | 1  |
| [K].tPEENEPTQLEGGPDSLGFETLENcR.[K] | N-Term(iTRAQ4plex); C25(Carbar | 1 | 1  |
| [K].vELAcGk.[S]                    | N-Term(iTRAQ4plex); C5(Carbam  | 1 | 1  |
| [R].AGLAASLAGPHSIVGR.[A]           |                                | 1 | 1  |
| [R].aGLAASLAGPHSIVGR.[A]           | N-Term(iTRAQ4plex)             | 1 | 1  |
| [R].aVVVHAGEDDLGR.[G]              | N-Term(iTRAQ4plex)             | 1 | 1  |
| [R].aVVVHAGEDDLGR.[G]              | N-Term(iTRAQ4plex)             | 1 | 1  |
| [K].aQGFTEDTIVFLPQTDk.[C]          | N-Term(iTRAQ4plex); K17(iTRAQ  | 1 | 1  |
| [K].kaALSMck.[S]                   | N-Term(iTRAQ4plex); K1(iTRAQ4  | 1 | 1  |
| [K].iLIGTVFHk.[AT]                 | N-Term(iTRAQ4plex); K9(iTRAQ4  | 1 | 1  |
| [K].sTVEIFk.[F]                    | N-Term(iTRAQ4plex); K7(iTRAQ4  | 1 | 1  |
| [K].iLIGTVFHk.[AT]                 | K9(iTRAQ4plex)                 | 1 | 1  |
| [K].iLIGTVFHk.[AT]                 | N-Term(iTRAQ4plex); K9(iTRAQ4  | 1 | 1  |
| [K].iLIGTVFHk.[AT]                 | N-Term(iTRAQ4plex); K9(iTRAQ4  | 1 | 1  |
| [K].IGDDLLQcHPAVk.[F]              | N-Term(iTRAQ4plex); C8(Carbam  | 1 | 1  |
| [R].rGDSPWQVLLDsk.[K]              | N-Term(iTRAQ4plex); K14(iTRAQ  | 1 | 1  |
| [R].rGDSPWQVLLDsk.[K]              | N-Term(iTRAQ4plex); K14(iTRAQ  | 1 | 1  |
| [R].rGDSPWQVLLDsk.[K]              | N-Term(iTRAQ4plex); K14(iTRAQ  | 1 | 1  |
| [K].IGDDLLQcHPAVk.[F]              | N-Term(iTRAQ4plex); C8(Carbam  | 1 | 1  |
| [R].rGDSPWQVLLDsk.[K]              | N-Term(iTRAQ4plex); K14(iTRAQ  | 1 | 1  |
| [R].rGDSPWQVLLDsk.[K]              | N-Term(iTRAQ4plex); K14(iTRAQ  | 1 | 1  |
| [K].IGDDLLQcHPAVk.[F]              | N-Term(iTRAQ4plex); C8(Carbam  | 1 | 1  |
| [R].vNHVTLsqPk.[I]                 | N-Term(iTRAQ4plex); K10(iTRAQ  | 1 | 1  |
| [K].vEHSDLSFSk.[D]                 | N-Term(iTRAQ4plex); K10(iTRAQ  | 1 | 1  |
| [R].vNHVTLsqPk.[I]                 | K10(iTRAQ4plex)                | 1 | 1  |
| [K].vGSakPGLQk.[V]                 | N-Term(iTRAQ4plex); K5(iTRAQ4  | 1 | 1  |
| [K].vVDVLDSIk.[T]                  | N-Term(iTRAQ4plex); K9(iTRAQ4  | 1 | 1  |
| [R].iTcTEEGWSPTPk.[C]              | N-Term(iTRAQ4plex); C3(Carbam  | 2 | 2  |
| [K].gEcHVPILEANVDAQPk.[K]          | N-Term(iTRAQ4plex); C3(Carbam  | 1 | 1  |
| [K].iAGVNIk.[T]                    | N-Term(iTRAQ4plex); K7(iTRAQ4  | 1 | 1  |
| [R].IFINVAPHAR.[I]                 | N-Term(iTRAQ4plex)             | 1 | 1  |
| [R].sLVELTPIAAVHGR.[W]             | N-Term(iTRAQ4plex)             | 1 | 1  |
| [K].kPLIGTVLAMPDAAR.[H]            | N-Term(iTRAQ4plex); K1(iTRAQ4  | 1 | 1  |
| [R].vDAETGDVFAIER.[L]              | N-Term(iTRAQ4plex)             | 1 | 1  |
| [K].yEkPDGSPVFIaFR.[S]             | N-Term(iTRAQ4plex); K3(iTRAQ4  | 1 | 1  |
| [K].svQYDDVPEYk.[D]                | N-Term(iTRAQ4plex); K11(iTRAQ  | 1 | 1  |
| [R].hQGVMVGMGQk.[D]                | N-Term(iTRAQ4plex); K11(iTRAQ  | 1 | 7  |
| [KR].sYELPDGQVITIGNER.[F]          | N-Term(iTRAQ4plex)             | 1 | 10 |
| [R].vsQYIEWLQk.[L]                 | N-Term(iTRAQ4plex); K10(iTRAQ  | 1 | 1  |
| [R].vAQVIIPSTYVPGTTNHDIALLR.[L]    | N-Term(iTRAQ4plex)             | 1 | 1  |



|                                 |                                         |   |   |
|---------------------------------|-----------------------------------------|---|---|
| [R].rGHLFLQTDQPIYNPGQR.[V]      | N-Term(iTRAQ4plex)                      | 2 | 2 |
| [R].rGHLFLQTDQPIYNPGQR.[V]      | N-Term(iTRAQ4plex)                      | 2 | 2 |
| [R].gHLFLQTDQPIYNPGQR.[V]       | N-Term(iTRAQ4plex)                      | 2 | 2 |
| [K].ITQVLHFTk.[D]               | K9(iTRAQ4plex)                          | 2 | 2 |
| [K].ScGLHQLLR.[G]               | C2(Carbamidomethyl)                     | 2 | 2 |
| [R].FGLLDEDGkk.[T]              | K9(iTRAQ4plex); K10(iTRAQ4plex)         | 2 | 2 |
| [K].shkPLNMGk.[V]               | N-Term(iTRAQ4plex); K3(iTRAQ4plex)      | 2 | 2 |
| [K].IGQYASPTAk.[R]              | N-Term(iTRAQ4plex); K10(iTRAQ4plex)     | 2 | 2 |
| [K].IVNGQSHISLsk.[A]            | N-Term(iTRAQ4plex); K12(iTRAQ4plex)     | 2 | 2 |
| [R].kADGSYAAWLSR.[DG]           | K1(iTRAQ4plex)                          | 2 | 2 |
| [R].kADGSYAAWLSR.[DG]           | N-Term(iTRAQ4plex)                      | 2 | 2 |
| [R].kADGSYAAWLSR.[DG]           | N-Term(iTRAQ4plex)                      | 2 | 2 |
| [R].kADGSYAAWLSR.[DG]           | K1(iTRAQ4plex)                          | 2 | 2 |
| [R].tLEIPGNSDPNmIPDGDfNSyVR.[V] | N-Term(iTRAQ4plex); M12(Oxidation)      | 2 | 2 |
| [K].shALQLNNR.[Q]               | N-Term(iTRAQ4plex)                      | 2 | 2 |
| [K].shkPLNMGk.[V]               | N-Term(iTRAQ4plex); K3(iTRAQ4plex)      | 2 | 2 |
| [R].tLEIPGNSDPNMIPDGDfNSyVR.[V] | N-Term(iTRAQ4plex)                      | 2 | 2 |
| [R].tLEIPGNSDPNMIPDGDfNSyVR.[V] | N-Term(iTRAQ4plex)                      | 2 | 2 |
| [R].TLEIPGNSDPNMIPDGDfNSyVR.[V] |                                         | 2 | 2 |
| [R].gLEELQFSLGsk.[I]            | N-Term(iTRAQ4plex); K13(iTRAQ4plex)     | 2 | 2 |
| [R].gLEELQFSLGsk.[I]            | N-Term(iTRAQ4plex); K13(iTRAQ4plex)     | 2 | 2 |
| [R].gLEELQFSLGsk.[I]            | N-Term(iTRAQ4plex); K13(iTRAQ4plex)     | 2 | 2 |
| [R].gLEELQFSLGsk.[I]            | N-Term(iTRAQ4plex); K13(iTRAQ4plex)     | 2 | 2 |
| [R].gLEELQFSLGsk.[I]            | N-Term(iTRAQ4plex); K13(iTRAQ4plex)     | 2 | 2 |
| [R].gLEELQFSLGsk.[I]            | N-Term(iTRAQ4plex); K13(iTRAQ4plex)     | 2 | 2 |
| [R].gLEELQFSLGsk.[I]            | N-Term(iTRAQ4plex); K13(iTRAQ4plex)     | 2 | 2 |
| [R].eELVYELNPLDHR.[G]           | N-Term(iTRAQ4plex)                      | 2 | 2 |
| [R].eELVYELNPLDHR.[G]           | N-Term(iTRAQ4plex)                      | 2 | 2 |
| [R].eELVYELNPLDHR.[G]           | N-Term(iTRAQ4plex)                      | 2 | 2 |
| [R].eELVYELNPLDHR.[G]           | N-Term(iTRAQ4plex)                      | 2 | 2 |
| [R].cSVFYGAPsk.[S]              | N-Term(iTRAQ4plex); C1(Carbamidomethyl) | 2 | 2 |
| [R].cSVFYGAPsk.[S]              | N-Term(iTRAQ4plex); C1(Carbamidomethyl) | 2 | 2 |
| [R].vHYTVciWR.[N]               | N-Term(iTRAQ4plex); C6(Carbamidomethyl) | 2 | 2 |
| [K].vDFTLSSER.[D]               | N-Term(iTRAQ4plex)                      | 2 | 2 |
| [R].vHYTVciWR.[N]               | N-Term(iTRAQ4plex); C6(Carbamidomethyl) | 2 | 2 |
| [R].vHYTVciWR.[N]               | N-Term(iTRAQ4plex); C6(Carbamidomethyl) | 2 | 2 |
| [R].kADGSYAAWLSR.[DG]           | K1(iTRAQ4plex)                          | 2 | 2 |
| [K].iTQVLHFTk.[D]               | N-Term(iTRAQ4plex); K9(iTRAQ4plex)      | 2 | 2 |
| [K].iTQVLHFTk.[D]               | N-Term(iTRAQ4plex); K9(iTRAQ4plex)      | 2 | 2 |
| [R].kADGSYAAWLSR.[DG]           | N-Term(iTRAQ4plex)                      | 2 | 2 |
| [K].iTQVLHFTk.[D]               | N-Term(iTRAQ4plex); K9(iTRAQ4plex)      | 2 | 2 |
| [R].GHLFLQTDQPIYNPGQR.[V]       |                                         | 2 | 2 |
| [K].mRPSTDTITVMVENSHGLR.[V]     | N-Term(iTRAQ4plex)                      | 2 | 2 |
| [K].shkPLNMGk.[V]               | N-Term(iTRAQ4plex); K3(iTRAQ4plex)      | 2 | 2 |
| [K].shkPLNMGk.[V]               | N-Term(iTRAQ4plex); K3(iTRAQ4plex)      | 2 | 2 |
| [R].aLEILQEEIDLIEDDIPVR.[S]     | N-Term(iTRAQ4plex)                      | 2 | 2 |
| [R].kADGSYAAWLSR.[DG]           | N-Term(iTRAQ4plex); K1(iTRAQ4plex)      | 2 | 2 |
| [K].mRPSTDTITVMVENSHGLR.[V]     | N-Term(iTRAQ4plex); M1(Oxidation)       | 2 | 2 |
| [R].rGHLFLQTDQPIYNPGQR.[V]      | N-Term(iTRAQ4plex)                      | 2 | 2 |
| [R].rGHLFLQTDQPIYNPGQR.[V]      | N-Term(iTRAQ4plex)                      | 2 | 2 |
| [R].rGHLFLQTDQPIYNPGQR.[V]      | N-Term(iTRAQ4plex)                      | 2 | 2 |
| [R].rGHLFLQTDQPIYNPGQR.[V]      | N-Term(iTRAQ4plex)                      | 2 | 2 |



|                                      |                                           |   |   |
|--------------------------------------|-------------------------------------------|---|---|
| [R].GPEVQLVAHSPWLk.[D]               | K14(iTRAQ4plex)                           | 2 | 2 |
| [K].eVYMPSSIFQDDFVIPDISEPGTWk.[I]    | N-Term(iTRAQ4plex); K25(iTRAQ4plex)       | 2 | 2 |
| [K].eVYMPSSIFQDDFVIPDISEPGTWk.[I]    | N-Term(iTRAQ4plex); K25(iTRAQ4plex)       | 2 | 2 |
| [K].aEmADQAAAWL TR.[Q]               | N-Term(iTRAQ4plex); M3(Oxidation)         | 1 | 1 |
| [R].gHLFLQTDQPIYNPGQR.[V]            | N-Term(iTRAQ4plex)                        | 2 | 2 |
| [K].sHALQLNNR.[Q]                    | N-Term(iTRAQ4plex)                        | 2 | 2 |
| [K].aEmADQAAAWL TR.[Q]               | N-Term(iTRAQ4plex); M3(Oxidation)         | 1 | 1 |
| [K].aDGSYAAWLSR.[DG]                 | N-Term(iTRAQ4plex)                        | 2 | 2 |
| [R].vGDTLNLNLR.[A]                   | N-Term(iTRAQ4plex)                        | 2 | 2 |
| [R].vGDTLNLNLR.[A]                   | N-Term(iTRAQ4plex)                        | 2 | 2 |
| [R].ecVGFEAVQEVVGLVQPASATLYDYNNPE    | N-Term(iTRAQ4plex); C2(Carbamidomethyl)   | 2 | 2 |
| [R].ecVGFEAVQEVVGLVQPASATLYDYNNPE    | N-Term(iTRAQ4plex); C2(Carbamidomethyl)   | 2 | 2 |
| [R].vTASDPLDTLGSEGALSPGGVASLLR.[L]   | N-Term(iTRAQ4plex)                        | 2 | 2 |
| [R].sTQDVTIALDALSAWIASHTTEER.[G]     | N-Term(iTRAQ4plex)                        | 2 | 2 |
| [R].STQDVTIALDALSAWIASHTTEER.[G]     |                                           | 2 | 2 |
| [K].eVYmPSSIFQDDFVIPDISEPGTWk.[I]    | N-Term(iTRAQ4plex); M4(Oxidation)         | 2 | 2 |
| [R].lLATLcSAEVcQcAEGk.[C]            | N-Term(iTRAQ4plex); C6(Carbamidomethyl)   | 2 | 2 |
| [R].VTASDPLDTLGSEGALSPGGVASLLR.[L]   |                                           | 2 | 2 |
| [R].vTASDPLDTLGSEGALSPGGVASLLR.[L]   | N-Term(iTRAQ4plex)                        | 2 | 2 |
| [R].LLATLcSAEVcQcAEGk.[C]            | C6(Carbamidomethyl); C11(Carbamidomethyl) | 2 | 2 |
| [R].kADGSYAAWLSR.[DG]                | N-Term(iTRAQ4plex); K1(iTRAQ4plex)        | 2 | 2 |
| [R].kADGSYAAWLSR.[DG]                | N-Term(iTRAQ4plex); K1(iTRAQ4plex)        | 2 | 2 |
| [K].scGLHQLLR.[G]                    | N-Term(iTRAQ4plex); C2(Carbamidomethyl)   | 2 | 2 |
| [R].vFALDQk.[M]                      | N-Term(iTRAQ4plex); K7(iTRAQ4plex)        | 2 | 2 |
| [R].kADGSYAAWLSR.[DG]                | N-Term(iTRAQ4plex); K1(iTRAQ4plex)        | 2 | 2 |
| [R].kADGSYAAWLSR.[DG]                | N-Term(iTRAQ4plex); K1(iTRAQ4plex)        | 2 | 2 |
| [R].kADGSYAAWLSR.[DG]                | N-Term(iTRAQ4plex); K1(iTRAQ4plex)        | 2 | 2 |
| [K].vVEEQESR.[V]                     | N-Term(iTRAQ4plex)                        | 2 | 2 |
| [K].vLSLAQEQVGGSPek.[L]              | N-Term(iTRAQ4plex); K15(iTRAQ4plex)       | 2 | 2 |
| [R].eAPKVVEEQESR.[V]                 | N-Term(iTRAQ4plex); K4(iTRAQ4plex)        | 2 | 2 |
| [R].aAcAQLNDFLQEQGTQGcQV.[-]         | N-Term(iTRAQ4plex); C3(Carbamidomethyl)   | 2 | 2 |
| [R].aAcAQLNDFLQEQGTQGcQV.[-]         | N-Term(iTRAQ4plex); C3(Carbamidomethyl)   | 2 | 2 |
| [K].aEMADQAAAWL TR.[Q]               | N-Term(iTRAQ4plex)                        | 1 | 1 |
| [K].aEMADQAAAWL TR.[Q]               | N-Term(iTRAQ4plex)                        | 1 | 1 |
| [R].lLATLcSAEVcQcAEGk.[C]            | N-Term(iTRAQ4plex); C6(Carbamidomethyl)   | 2 | 2 |
| [R].lLATLcSAEVcQcAEGk.[C]            | N-Term(iTRAQ4plex); C6(Carbamidomethyl)   | 2 | 2 |
| [R].lLATLcSAEVcQcAEGk.[C]            | N-Term(iTRAQ4plex); C6(Carbamidomethyl)   | 2 | 2 |
| [R].lLATLcSAEVcQcAEGk.[C]            | N-Term(iTRAQ4plex); C6(Carbamidomethyl)   | 2 | 2 |
| [R].ePFLSccQFAESLR.[K]               | N-Term(iTRAQ4plex); C6(Carbamidomethyl)   | 2 | 2 |
| [R].ePFLSccQFAESLR.[K]               | N-Term(iTRAQ4plex); C6(Carbamidomethyl)   | 2 | 2 |
| [R].ePFLSccQFAESLR.[K]               | N-Term(iTRAQ4plex); C6(Carbamidomethyl)   | 2 | 2 |
| [R].avGSGATFSHYYYMILSR.[G]           | N-Term(iTRAQ4plex)                        | 2 | 2 |
| [K].aSAGLLGAHAAAITAYALTLTKAPADLR.[G] | N-Term(iTRAQ4plex); K22(iTRAQ4plex)       | 1 | 1 |
| [K].aEFQDALEk.[L]                    | N-Term(iTRAQ4plex); K9(iTRAQ4plex)        | 2 | 2 |
| [R].tTNIQGINLLFSSR.[R]               | N-Term(iTRAQ4plex)                        | 2 | 2 |
| [R].tTNIQGINLLFSSR.[R]               | N-Term(iTRAQ4plex)                        | 2 | 2 |
| [K].tEQWSTLPPETk.[D]                 | N-Term(iTRAQ4plex); K12(iTRAQ4plex)       | 2 | 2 |
| [K].tEQWSTLPPETk.[D]                 | N-Term(iTRAQ4plex); K12(iTRAQ4plex)       | 2 | 2 |
| [K].tEQWSTLPPETk.[D]                 | N-Term(iTRAQ4plex); K12(iTRAQ4plex)       | 2 | 2 |
| [K].tEQWSTLPPETk.[D]                 | N-Term(iTRAQ4plex); K12(iTRAQ4plex)       | 2 | 2 |
| [R].TTNIQGINLLFSSR.[R]               |                                           | 2 | 2 |
| [K].tEQWSTLPPETk.[D]                 | N-Term(iTRAQ4plex); K12(iTRAQ4plex)       | 2 | 2 |

|                                     |                                         |   |   |
|-------------------------------------|-----------------------------------------|---|---|
| [K].tEQWSTLPPETk.[D]                | N-Term(iTRAQ4plex); K12(iTRAQ4plex)     | 2 | 2 |
| [K].TEQWSTLPPETk.[D]                | K12(iTRAQ4plex)                         | 2 | 2 |
| [K].tEQWSTLPPETk.[D]                | N-Term(iTRAQ4plex); K12(iTRAQ4plex)     | 2 | 2 |
| [K].tEQWSTLPPETk.[D]                | N-Term(iTRAQ4plex); K12(iTRAQ4plex)     | 2 | 2 |
| [R].dFALLSLQVPLk.[D]                | N-Term(iTRAQ4plex); K12(iTRAQ4plex)     | 2 | 2 |
| [R].aLEILQEEDLIDEDDIPVR.[S]         | N-Term(iTRAQ4plex)                      | 2 | 2 |
| [K].shKPLNMGk.[V]                   | N-Term(iTRAQ4plex); K3(iTRAQ4plex)      | 2 | 2 |
| [K].INMGITDLQGLR.[L]                | N-Term(iTRAQ4plex)                      | 2 | 2 |
| [K].INMGITDLQGLR.[L]                | N-Term(iTRAQ4plex)                      | 2 | 2 |
| [R].EELVYELNPLDHR.[G]               |                                         | 2 | 2 |
| [K].vGLSGmAIADVTLLSGFHALR.[A]       | N-Term(iTRAQ4plex); M6(Oxidation)       | 2 | 2 |
| [R].rFEQLELRPVLYNYLDk.[N]           | N-Term(iTRAQ4plex); K17(iTRAQ4plex)     | 2 | 2 |
| [R].hLVPGAPFLQALVR.[E]              | N-Term(iTRAQ4plex)                      | 2 | 2 |
| [K].aSAGLLGAHAAAITAYALTLTk.[A]      | N-Term(iTRAQ4plex); K22(iTRAQ4plex)     | 2 | 2 |
| [K].aSAGLLGAHAAAITAYALTLTk.[A]      | N-Term(iTRAQ4plex); K22(iTRAQ4plex)     | 2 | 2 |
| [K].IQETSNWLLSQQQADGSFQDLSPVIHR.[S] | N-Term(iTRAQ4plex)                      | 1 | 1 |
| [R].vDVQAGAcEGk.[L]                 | N-Term(iTRAQ4plex); C8(Carbamidomethyl) | 2 | 2 |
| [R].vDVQAGAcEGk.[L]                 | N-Term(iTRAQ4plex); C8(Carbamidomethyl) | 2 | 2 |
| [R].vDVQAGAcEGk.[L]                 | N-Term(iTRAQ4plex); C8(Carbamidomethyl) | 2 | 2 |
| [K].IQETSNWLLSQQQADGSFQDLSPVIHR.[S] | N-Term(iTRAQ4plex)                      | 1 | 1 |
| [K].ITPGkPYILTVPGHLDQMQLDIQAR.[Y]   | N-Term(iTRAQ4plex); K5(iTRAQ4plex)      | 2 | 2 |
| [K].dHAVDLIQk.[G]                   | N-Term(iTRAQ4plex); K9(iTRAQ4plex)      | 2 | 2 |
| [R].tTNIQGINLLFSSR.[R]              | N-Term(iTRAQ4plex)                      | 2 | 2 |
| [K].dHAVDLIQk.[G]                   | N-Term(iTRAQ4plex); K9(iTRAQ4plex)      | 2 | 2 |
| [K].dHAVDLIQk.[G]                   | N-Term(iTRAQ4plex); K9(iTRAQ4plex)      | 2 | 2 |
| [K].ITPGkPYILTVPGHLDQMQLDIQAR.[Y]   | N-Term(iTRAQ4plex); K5(iTRAQ4plex)      | 2 | 2 |
| [K].dHAVDLIQk.[G]                   | N-Term(iTRAQ4plex); K9(iTRAQ4plex)      | 2 | 2 |
| [K].dHAVDLIQk.[G]                   | N-Term(iTRAQ4plex); K9(iTRAQ4plex)      | 2 | 2 |
| [K].INMGITDLQGLR.[L]                | N-Term(iTRAQ4plex)                      | 2 | 2 |
| [R].fGLLEDGk.[K]                    | N-Term(iTRAQ4plex); K9(iTRAQ4plex)      | 2 | 2 |
| [R].VDVQAGAcEGk.[L]                 | C8(Carbamidomethyl); K11(iTRAQ4plex)    | 2 | 2 |
| [K].VLSLAQEQVGGSPek.[L]             | K15(iTRAQ4plex)                         | 2 | 2 |
| [R].gLQDEDEGYR.[M]                  | N-Term(iTRAQ4plex)                      | 2 | 2 |
| [R].gLQDEDEGYR.[M]                  | N-Term(iTRAQ4plex)                      | 2 | 2 |
| [R].DFALLSLQVPLk.[D]                | K12(iTRAQ4plex)                         | 2 | 2 |
| [R].LTVAAPPSGGPGFLSIERPDSRPPR.[V]   |                                         | 2 | 2 |
| [R].gLQDEDEGYR.[M]                  | N-Term(iTRAQ4plex)                      | 2 | 2 |
| [R].gLQDEDEGYR.[M]                  | N-Term(iTRAQ4plex)                      | 2 | 2 |
| [R].eMSGSPASGIPVv.[V]               | N-Term(iTRAQ4plex); K13(iTRAQ4plex)     | 2 | 2 |
| [R].fGLLEDGk.[T]                    | N-Term(iTRAQ4plex); K9(iTRAQ4plex)      | 2 | 2 |
| [R].fGLLEDGk.[T]                    | N-Term(iTRAQ4plex); K9(iTRAQ4plex)      | 2 | 2 |
| [R].fGLLEDGk.[K]                    | N-Term(iTRAQ4plex); K9(iTRAQ4plex)      | 2 | 2 |
| [R].gLQDEDEGYR.[M]                  | N-Term(iTRAQ4plex)                      | 2 | 2 |
| [R].gLQDEDEGYR.[M]                  | N-Term(iTRAQ4plex)                      | 2 | 2 |
| [R].gLQDEDEGYR.[M]                  | N-Term(iTRAQ4plex)                      | 2 | 2 |
| [R].gLQDEDEGYR.[M]                  | N-Term(iTRAQ4plex)                      | 2 | 2 |
| [R].tYNVLDmK.[N]                    | N-Term(iTRAQ4plex); K8(iTRAQ4plex)      | 2 | 2 |
| [K].LHLETDSLALVALGALDTALYAAGSk.[S]  | K26(iTRAQ4plex)                         | 2 | 2 |
| [K].IHLETDSLALVALGALDTALYAAGSk.[S]  | N-Term(iTRAQ4plex); K26(iTRAQ4plex)     | 2 | 2 |
| [R].ITVAAPPSGGPGFLSIERPDSRPPR.[V]   | N-Term(iTRAQ4plex)                      | 2 | 2 |
| [R].ITVAAPPSGGPGFLSIERPDSRPPR.[V]   | N-Term(iTRAQ4plex)                      | 2 | 2 |
| [R].ITVAAPPSGGPGFLSIERPDSRPPR.[V]   | N-Term(iTRAQ4plex)                      | 2 | 2 |

|                                     |                                         |   |   |
|-------------------------------------|-----------------------------------------|---|---|
| [R].fQILTLWLPSLTTWEIHGLSLSk.[T]     | N-Term(iTRAQ4plex); K24(iTRAQ4plex)     | 2 | 2 |
| [R].fQILTLWLPSLTTWEIHGLSLSk.[T]     | N-Term(iTRAQ4plex); K24(iTRAQ4plex)     | 2 | 2 |
| [K].tEQWSTLPPETk.[D]                | N-Term(iTRAQ4plex); K12(iTRAQ4plex)     | 2 | 2 |
| [R].sMQGGLVGNDETVALTAFVTIALHHGLAV   | N-Term(iTRAQ4plex); K39(iTRAQ4plex)     | 2 | 2 |
| [K].tEQWSTLPPETk.[D]                | N-Term(iTRAQ4plex); K12(iTRAQ4plex)     | 2 | 2 |
| [K].tEQWSTLPPETk.[D]                | N-Term(iTRAQ4plex); K12(iTRAQ4plex)     | 2 | 2 |
| [K].tEQWSTLPPETk.[D]                | N-Term(iTRAQ4plex); K12(iTRAQ4plex)     | 2 | 2 |
| [R].sMQGGLVGNDETVALTAFVTIALHHGLAV   | N-Term(iTRAQ4plex); K39(iTRAQ4plex)     | 2 | 2 |
| [K].tEQWSTLPPETk.[D]                | N-Term(iTRAQ4plex); K12(iTRAQ4plex)     | 2 | 2 |
| [K].tEQWSTLPPETk.[D]                | N-Term(iTRAQ4plex); K12(iTRAQ4plex)     | 2 | 2 |
| [K].IELSVDGak.[Q]                   | N-Term(iTRAQ4plex); K9(iTRAQ4plex)      | 2 | 2 |
| [K].IGQYASPTak.[R]                  | N-Term(iTRAQ4plex); K10(iTRAQ4plex)     | 2 | 2 |
| [R].sTQDVTIALDALSAWIASHTTEER.[G]    | N-Term(iTRAQ4plex)                      | 2 | 2 |
| [K].vGLSGMAIADVTLISGFHALR.[A]       | N-Term(iTRAQ4plex)                      | 2 | 2 |
| [R].sFFPENWLWR.[V]                  | N-Term(iTRAQ4plex)                      | 2 | 2 |
| [R].sFFPENWLWR.[V]                  |                                         | 2 | 2 |
| [K].vGLSGMAIADVTLISGFHALR.[A]       | N-Term(iTRAQ4plex)                      | 2 | 2 |
| [K].aEmADQAAAWLTR.[Q]               | N-Term(iTRAQ4plex); M3(Oxidation)       | 1 | 1 |
| [R].FGLLEDGgk.[T]                   | K9(iTRAQ4plex); K10(iTRAQ4plex)         | 2 | 2 |
| [R].vTASDPLDTLGSEGALSPGGVASLLR.[L]  | N-Term(iTRAQ4plex)                      | 2 | 2 |
| [R].ILLFSPSVVHLGVPLSVGVQLQDVPR.[G]  | N-Term(iTRAQ4plex)                      | 2 | 2 |
| [R].ILLFSPSVVHLGVPLSVGVQLQDVPR.[G]  | N-Term(iTRAQ4plex)                      | 2 | 2 |
| [R].hLVPGAPFLLOALVR.[E]             | N-Term(iTRAQ4plex)                      | 2 | 2 |
| [R].dkGQAGLQR.[A]                   | N-Term(iTRAQ4plex); K2(iTRAQ4plex)      | 2 | 2 |
| [K].sHALQLNNR.[Q]                   | N-Term(iTRAQ4plex)                      | 2 | 2 |
| [R].cSVFYGAPSk.[S]                  | N-Term(iTRAQ4plex); C1(Carbamidomethyl) | 2 | 2 |
| [K].sHKPLNmGk.[V]                   | N-Term(iTRAQ4plex); K3(iTRAQ4plex)      | 2 | 2 |
| [K].sHKPLNMGk.[V]                   | N-Term(iTRAQ4plex); K9(iTRAQ4plex)      | 2 | 2 |
| [K].tEQWSTLPPETk.[D]                | N-Term(iTRAQ4plex); K12(iTRAQ4plex)     | 2 | 2 |
| [R].gPEVQLVAHSPWLk.[D]              | N-Term(iTRAQ4plex); K14(iTRAQ4plex)     | 2 | 2 |
| [R].gLQDEDEGYR.[M]                  | N-Term(iTRAQ4plex)                      | 2 | 2 |
| [K].sHALQLNNR.[Q]                   | N-Term(iTRAQ4plex)                      | 2 | 2 |
| [K].LQETSNWLLSQQQADGSFQDLSPVIHR.[S] |                                         | 1 | 1 |
| [R].eELVYELNPLDHR.[G]               | N-Term(iTRAQ4plex)                      | 2 | 2 |
| [R].vEYGFQVk.[V]                    | N-Term(iTRAQ4plex); K8(iTRAQ4plex)      | 2 | 2 |
| [R].ITVAAPPSGGPGFLSIERPDSRPPR.[V]   | N-Term(iTRAQ4plex)                      | 2 | 2 |
| [R].gPEVQLVAHSPWLk.[D]              | N-Term(iTRAQ4plex); K14(iTRAQ4plex)     | 2 | 2 |
| [R].gLQDEDEGYR.[M]                  | N-Term(iTRAQ4plex)                      | 2 | 2 |
| [K].TEQWSTLPPETk.[D]                | K12(iTRAQ4plex)                         | 2 | 2 |
| [R].cSVFYGAPSk.[S]                  | N-Term(iTRAQ4plex); C1(Carbamidomethyl) | 2 | 2 |
| [K].IGQYASPTak.[R]                  | N-Term(iTRAQ4plex); K10(iTRAQ4plex)     | 2 | 2 |
| [K].aEFQDALEk.[L]                   | N-Term(iTRAQ4plex); K9(iTRAQ4plex)      | 2 | 2 |
| [K].TEQWSTLPPETk.[D]                | K12(iTRAQ4plex)                         | 2 | 2 |
| [K].scGLHQLLR.[G]                   | N-Term(iTRAQ4plex); C2(Carbamidomethyl) | 2 | 2 |
| [R].tLEIPGNSDPNMIPDGFNSYVR.[V]      | N-Term(iTRAQ4plex)                      | 2 | 2 |
| [R].tYNVLDmK.[N]                    | N-Term(iTRAQ4plex); K8(iTRAQ4plex)      | 2 | 2 |
| [K].tEQWSTLPPETk.[D]                | N-Term(iTRAQ4plex); K12(iTRAQ4plex)     | 2 | 2 |
| [K].tEQWSTLPPETk.[D]                | N-Term(iTRAQ4plex); K12(iTRAQ4plex)     | 2 | 2 |
| [K].vLQIEKEGAIHR.[E]                | N-Term(iTRAQ4plex); K6(iTRAQ4plex)      | 2 | 2 |
| [K].ScGLHQLLR.[G]                   | C2(Carbamidomethyl)                     | 2 | 2 |
| [R].nNVPcSPk.[V]                    | N-Term(iTRAQ4plex); C5(Carbamidomethyl) | 2 | 2 |
| [R].GHLFLQTDQPIYNPGQR.[V]           |                                         | 2 | 2 |

|                                   |                               |   |   |
|-----------------------------------|-------------------------------|---|---|
| [R].tTNIQGINLLFSSR.[R]            | N-Term(iTRAQ4plex)            | 2 | 2 |
| [R].kADGSYAAWLSR.[DG]             | N-Term(iTRAQ4plex); K1(iTRAQ4 | 2 | 2 |
| [R].vHYTVcIWR.[N]                 | N-Term(iTRAQ4plex); C6(Carbam | 2 | 2 |
| [R].GHLFLQTDQPIYNPGQR.[V]         |                               | 2 | 2 |
| [K].vDFTLSSER.[D]                 | N-Term(iTRAQ4plex)            | 2 | 2 |
| [K].YVLPNFEVk.[I]                 | K9(iTRAQ4plex)                | 2 | 2 |
| [R].RGHLFLQTDQPIYNPGQR.[V]        |                               | 2 | 2 |
| [R].gLQDEDEGYR.[M]                | N-Term(iTRAQ4plex)            | 2 | 2 |
| [K].kYVLPNFEVk.[I]                | N-Term(iTRAQ4plex); K1(iTRAQ4 | 2 | 2 |
| [K].scGLHQLLR.[G]                 | N-Term(iTRAQ4plex); C2(Carbam | 2 | 2 |
| [K].sHALQLNNR.[Q]                 | N-Term(iTRAQ4plex)            | 2 | 2 |
| [R].kADGSYAAWLSR.[DG]             | N-Term(iTRAQ4plex); K1(iTRAQ4 | 2 | 2 |
| [K].aEmADQAAAWLTR.[Q]             | N-Term(iTRAQ4plex); M3(Oxidat | 1 | 1 |
| [K].yVLPNFEVk.[I]                 | N-Term(iTRAQ4plex); K9(iTRAQ4 | 2 | 2 |
| [K].tEQWSTLPPETk.[D]              | N-Term(iTRAQ4plex); K12(iTRAQ | 2 | 2 |
| [K].LVNGQSHISLsk.[A]              | K12(iTRAQ4plex)               | 2 | 2 |
| [K].TEQWSTLPPETk.[D]              | K12(iTRAQ4plex)               | 2 | 2 |
| [K].dHAVDLIQkGYMR.[I]             | N-Term(iTRAQ4plex); K9(iTRAQ4 | 2 | 2 |
| [R].ITVAAPPSGGPGFLSIERPDSRPPR.[V] | N-Term(iTRAQ4plex)            | 2 | 2 |
| [K].vLSLAQEQVGGsPEk.[L]           | N-Term(iTRAQ4plex); K15(iTRAQ | 2 | 2 |
| [K].ITQVLHFTk.[D]                 | K9(iTRAQ4plex)                | 2 | 2 |
| [K].LGQYASPTAk.[R]                | K10(iTRAQ4plex)               | 2 | 2 |
| [R].QGSFQGGFR.[S]                 |                               | 2 | 2 |
| [R].EELVYELNPLDHR.[G]             |                               | 2 | 2 |
| [R].RGHLFLQTDQPIYNPGQR.[V]        |                               | 2 | 2 |
| [R].EELVYELNPLDHR.[G]             |                               | 2 | 2 |
| [R].yRVFALDQk.[M]                 | N-Term(iTRAQ4plex); K9(iTRAQ4 | 2 | 2 |
| [K].yVLPNFEVk.[I]                 | N-Term(iTRAQ4plex); K9(iTRAQ4 | 2 | 2 |
| [R].yLDkTEQWSTLPPETk.[D]          | N-Term(iTRAQ4plex); K4(iTRAQ4 | 2 | 2 |
| [R].gSFEFPVGDVAVsk.[V]            | N-Term(iTRAQ4plex); K13(iTRAQ | 2 | 2 |
| [R].nNVPcSPk.[V]                  | N-Term(iTRAQ4plex); C5(Carbam | 2 | 2 |
| [R].VHYTVcIWR.[N]                 | C6(Carbamidomethyl)           | 2 | 2 |
| [R].vEASISk.[A]                   | N-Term(iTRAQ4plex); K7(iTRAQ4 | 2 | 2 |
| [R].nNVPcSPk.[V]                  | N-Term(iTRAQ4plex); C5(Carbam | 2 | 2 |
| [R].vEASISk.[A]                   | N-Term(iTRAQ4plex); K7(iTRAQ4 | 2 | 2 |
| [R].tYNVLDmK.[N]                  | N-Term(iTRAQ4plex); K8(iTRAQ4 | 2 | 2 |
| [K].scGLHQLLR.[G]                 | N-Term(iTRAQ4plex); C2(Carbam | 2 | 2 |
| [R].dkGQAGLQR.[A]                 | N-Term(iTRAQ4plex); K2(iTRAQ4 | 2 | 2 |
| [R].tLEIPGNSDPNMIPDGDfNSYVR.[V]   | N-Term(iTRAQ4plex)            | 2 | 2 |
| [R].tLEIPGNSDPNMIPDGDfNSYVR.[V]   | N-Term(iTRAQ4plex)            | 2 | 2 |
| [K].yVLPNFEVk.[I]                 | N-Term(iTRAQ4plex); K9(iTRAQ4 | 2 | 2 |
| [K].LNMGITDLQGLR.[L]              |                               | 2 | 2 |
| [K].IGQYASPTAk.[R]                | N-Term(iTRAQ4plex); K10(iTRAQ | 2 | 2 |
| [R].VEASISk.[A]                   | K7(iTRAQ4plex)                | 2 | 2 |
| [K].AEMADQAAAWLTR.[Q]             |                               | 1 | 1 |
| [R].gLEELQFSLGsk.[I]              | N-Term(iTRAQ4plex); K13(iTRAQ | 2 | 2 |
| [R].gLQDEDEGYR.[M]                | N-Term(iTRAQ4plex)            | 2 | 2 |
| [R].cSVFYGAPskSR.[L]              | C1(Carbamidomethyl); K10(iTRA | 2 | 2 |
| [K].TEQWSTLPPETk.[D]              | K12(iTRAQ4plex)               | 2 | 2 |
| [R].yLDkTEQWSTLPPETk.[D]          | N-Term(iTRAQ4plex); K4(iTRAQ4 | 2 | 2 |
| [R].kADGSYAAWLSR.[DG]             | N-Term(iTRAQ4plex); K1(iTRAQ4 | 2 | 2 |
| [K].tkGLcVATPVQLR.[V]             | N-Term(iTRAQ4plex); K2(iTRAQ4 | 2 | 2 |



|                                     |                               |   |   |
|-------------------------------------|-------------------------------|---|---|
| [K].IELSVDGak.[Q]                   | N-Term(iTRAQ4plex); K9(iTRAQ4 | 2 | 2 |
| [R].ITVAAPPSGGPGFLSIERPDSRPPR.[V]   | N-Term(iTRAQ4plex)            | 2 | 2 |
| [K].VDFTLSSER.[D]                   |                               | 2 | 2 |
| [K].kYVLPNFEVk.[I]                  | K1(iTRAQ4plex); K10(iTRAQ4ple | 2 | 2 |
| [K].kYVLPNFEVk.[I]                  | N-Term(iTRAQ4plex); K10(iTRAQ | 2 | 2 |
| [K].IQETSNWLLSQQQADGSFQDLSPVIHR.[S] | N-Term(iTRAQ4plex)            | 1 | 1 |
| [K].kYVLPNFEVk.[I]                  | N-Term(iTRAQ4plex); K1(iTRAQ4 | 2 | 2 |
| [R].tYNVLDMk.[N]                    | N-Term(iTRAQ4plex); K8(iTRAQ4 | 2 | 2 |
| [R].fGLLEDGkk.[T]                   | N-Term(iTRAQ4plex); K9(iTRAQ4 | 2 | 2 |
| [R].eFHLHLR.[L]                     | N-Term(iTRAQ4plex)            | 2 | 2 |
| [R].RGHLFLQTDQPIYNPGQR.[V]          |                               | 2 | 2 |
| [R].GLQDEDGYR.[M]                   |                               | 2 | 2 |
| [K].vLSLAQEQVGGsPEk.[L]             | N-Term(iTRAQ4plex); K15(iTRAQ | 2 | 2 |
| [R].YIYGkPVQGVAYVR.[F]              | K5(iTRAQ4plex)                | 2 | 2 |
| [R].vEASISk.[A]                     | N-Term(iTRAQ4plex); K7(iTRAQ4 | 2 | 2 |
| [R].vEYGFQVk.[V]                    | N-Term(iTRAQ4plex); K8(iTRAQ4 | 2 | 2 |
| [R].vFALDQk.[M]                     | N-Term(iTRAQ4plex); K7(iTRAQ4 | 2 | 2 |
| [R].VHYTVcIWR.[N]                   | C6(Carbamidomethyl)           | 2 | 2 |
| [R].vFALDQk.[M]                     | N-Term(iTRAQ4plex); K7(iTRAQ4 | 2 | 2 |
| [R].nNVPcSPk.[V]                    | N-Term(iTRAQ4plex); C5(Carbam | 2 | 2 |
| [R].dkGQAGLQR.[A]                   | N-Term(iTRAQ4plex); K2(iTRAQ4 | 2 | 2 |
| [K].sHKPLNMGk.[V]                   | N-Term(iTRAQ4plex); K3(iTRAQ4 | 2 | 2 |
| [R].gLQDEDGYR.[M]                   | N-Term(iTRAQ4plex)            | 2 | 2 |
| [R].vEYGFQVk.[V]                    | N-Term(iTRAQ4plex); K8(iTRAQ4 | 2 | 2 |
| [R].cSVFYGAPSk.[S]                  | C1(Carbamidomethyl); K10(iTRA | 2 | 2 |
| [K].vVEEQESR.[V]                    | N-Term(iTRAQ4plex)            | 2 | 2 |
| [K].GLcVATPVQLR.[V]                 | C3(Carbamidomethyl)           | 2 | 2 |
| [R].tLEIPGNSDPNmIPDGFNSYVR.[V]      | N-Term(iTRAQ4plex); M12(Oxida | 2 | 2 |
| [K].vLSLAQEQVGGsPEk.[L]             | N-Term(iTRAQ4plex); K15(iTRAQ | 2 | 2 |
| [R].eELVYELNPLDHR.[G]               | N-Term(iTRAQ4plex)            | 2 | 2 |
| [R].QGSFQGGFR.[S]                   |                               | 2 | 2 |
| [K].tEQWSTLPPETk.[D]                | N-Term(iTRAQ4plex); K12(iTRAQ | 2 | 2 |
| [R].vEASISk.[A]                     | N-Term(iTRAQ4plex); K7(iTRAQ4 | 2 | 2 |
| [K].ADGSYAAWLSR.[DG]                |                               | 2 | 2 |
| [R].gLQDEDGYR.[M]                   | N-Term(iTRAQ4plex)            | 2 | 2 |
| [R].GLQDEDGYR.[M]                   |                               | 2 | 2 |
| [R].gQVvKGSVFLR.[N]                 | N-Term(iTRAQ4plex); K5(iTRAQ4 | 2 | 2 |
| [R].yLDkTEQWSTLPPETk.[D]            | N-Term(iTRAQ4plex); K4(iTRAQ4 | 2 | 2 |
| [R].dFALLSLQVPLkDAk.[S]             | N-Term(iTRAQ4plex); K12(iTRAQ | 2 | 2 |
| [K].vVEEQESR.[V]                    | N-Term(iTRAQ4plex)            | 2 | 2 |
| [R].aAcAQLNDFLQEYGTQGcQV.[-]        | N-Term(iTRAQ4plex); C3(Carbam | 2 | 2 |
| [K].vVEEQESR.[V]                    | N-Term(iTRAQ4plex)            | 2 | 2 |
| [R].eMSGSPASGIPVk.[V]               | N-Term(iTRAQ4plex); K13(iTRAQ | 2 | 2 |
| [K].FAcYYPR.[V]                     | C3(Carbamidomethyl)           | 2 | 2 |
| [R].vFALDQk.[M]                     | N-Term(iTRAQ4plex); K7(iTRAQ4 | 2 | 2 |
| [K].vVEEQESR.[V]                    | N-Term(iTRAQ4plex)            | 2 | 2 |
| [R].QGSFQGGFR.[S]                   |                               | 2 | 2 |
| [K].vVEEQESR.[V]                    | N-Term(iTRAQ4plex)            | 2 | 2 |
| [K].iTQVLHFTk.[D]                   | N-Term(iTRAQ4plex); K9(iTRAQ4 | 2 | 2 |
| [R].kADGSYAAWLSR.[DG]               | N-Term(iTRAQ4plex); K1(iTRAQ4 | 2 | 2 |
| [R].vFALDQk.[M]                     | N-Term(iTRAQ4plex); K7(iTRAQ4 | 2 | 2 |
| [K].qYRNGESVk.[L]                   | N-Term(iTRAQ4plex); K9(iTRAQ4 | 2 | 2 |

|                                 |                               |   |   |
|---------------------------------|-------------------------------|---|---|
| [R].VFALDQk.[M]                 | K7(iTRAQ4plex)                | 2 | 2 |
| [R].gLESQtk.[L]                 | N-Term(iTRAQ4plex); K7(iTRAQ4 | 2 | 2 |
| [R].dkGQAGLQR.[A]               | N-Term(iTRAQ4plex); K2(iTRAQ4 | 2 | 2 |
| [K].iTQVLHFTk.[D]               | N-Term(iTRAQ4plex); K9(iTRAQ4 | 2 | 2 |
| [R].gQIVFmNR.[E]                | N-Term(iTRAQ4plex); M6(Oxidat | 2 | 2 |
| [R].GQIVFMNR.[E]                |                               | 2 | 2 |
| [K].sHALQLNNR.[Q]               | N-Term(iTRAQ4plex)            | 2 | 2 |
| [R].GSFEFPVGDVAVSk.[V]          | K13(iTRAQ4plex)               | 2 | 2 |
| [R].VGDTLNLNLR.[A]              |                               | 2 | 2 |
| [R].YIYGkPVQGVAVVR.[F]          | K5(iTRAQ4plex)                | 2 | 2 |
| [R].gLQDEDEGYR.[M]              | N-Term(iTRAQ4plex)            | 2 | 2 |
| [R].dFALLSLQVPLk.[D]            | N-Term(iTRAQ4plex); K12(iTRAQ | 2 | 2 |
| [R].gPEVQLVAHSPWLk.[D]          | N-Term(iTRAQ4plex); K14(iTRAQ | 2 | 2 |
| [K].iTQVLHFTk.[D]               | N-Term(iTRAQ4plex); K9(iTRAQ4 | 2 | 2 |
| [R].gLESQtk.[L]                 | N-Term(iTRAQ4plex); K7(iTRAQ4 | 2 | 2 |
| [K].aDGSYAAWLSR.[DG]            | N-Term(iTRAQ4plex)            | 2 | 2 |
| [R].yIYGkPVQGVAVVR.[F]          | N-Term(iTRAQ4plex); K5(iTRAQ4 | 2 | 2 |
| [K].vVEEQESR.[V]                | N-Term(iTRAQ4plex)            | 2 | 2 |
| [K].vDFTLSSER.[D]               | N-Term(iTRAQ4plex)            | 2 | 2 |
| [R].EELVYELNPLDHR.[G]           |                               | 2 | 2 |
| [K].IELSVDGak.[Q]               | N-Term(iTRAQ4plex); K9(iTRAQ4 | 2 | 2 |
| [R].RGHLFLQTDQPIYNPGQR.[V]      |                               | 2 | 2 |
| [R].rFEQLELRPVLYNYLDk.[N]       | N-Term(iTRAQ4plex); K17(iTRAQ | 2 | 2 |
| [R].dkGQAGLQR.[A]               | N-Term(iTRAQ4plex); K2(iTRAQ4 | 2 | 2 |
| [K].iTQVLHFTk.[D]               | N-Term(iTRAQ4plex); K9(iTRAQ4 | 2 | 2 |
| [R].eFHLHLR.[L]                 | N-Term(iTRAQ4plex)            | 2 | 2 |
| [R].vEYGFQVk.[V]                | N-Term(iTRAQ4plex); K8(iTRAQ4 | 2 | 2 |
| [R].gLEELQFSLGsk.[I]            | N-Term(iTRAQ4plex); K13(iTRAQ | 2 | 2 |
| [R].tLEIPGNSDPNMIPDGDFNSYVR.[V] | N-Term(iTRAQ4plex)            | 2 | 2 |
| [R].dkGQAGLQR.[A]               | N-Term(iTRAQ4plex); K2(iTRAQ4 | 2 | 2 |
| [K].sHkPLNmGk.[V]               | N-Term(iTRAQ4plex); K3(iTRAQ4 | 2 | 2 |
| [K].mRPSTDTITVMVENSHGLR.[V]     | N-Term(iTRAQ4plex); M1(Oxidat | 2 | 2 |
| [R].gLESQtk.[L]                 | N-Term(iTRAQ4plex); K7(iTRAQ4 | 2 | 2 |
| [K].TEQWSTLPPETk.[D]            | K12(iTRAQ4plex)               | 2 | 2 |
| [R].GPEVQLVAHSPWLk.[D]          | K14(iTRAQ4plex)               | 2 | 2 |
| [R].vEYGFQVk.[V]                | N-Term(iTRAQ4plex); K8(iTRAQ4 | 2 | 2 |
| [K].ScGLHQLLR.[G]               | C2(Carbamidomethyl)           | 2 | 2 |
| [R].gHLFLQTDQPIYNPGQR.[V]       | N-Term(iTRAQ4plex)            | 2 | 2 |
| [R].ePFLScCQFAESLR.[K]          | N-Term(iTRAQ4plex); C6(Carbam | 2 | 2 |
| [R].gQIVFmNR.[E]                | N-Term(iTRAQ4plex); M6(Oxidat | 2 | 2 |
| [R].eFHLHLR.[L]                 | N-Term(iTRAQ4plex)            | 2 | 2 |
| [K].tEQWSTLPPETk.[D]            | N-Term(iTRAQ4plex); K12(iTRAQ | 2 | 2 |
| [K].vLQIEKEGAIHR.[E]            | N-Term(iTRAQ4plex); K6(iTRAQ4 | 2 | 2 |
| [R].eELVYELNPLDHR.[G]           | N-Term(iTRAQ4plex)            | 2 | 2 |
| [R].cSVFYGAPSk.[S]              | C1(Carbamidomethyl); K10(iTRA | 2 | 2 |
| [K].LNMGITDLQGLR.[L]            |                               | 2 | 2 |
| [R].VDVQAGAcEGk.[L]             | C8(Carbamidomethyl); K11(iTRA | 2 | 2 |
| [K].vTSIQHWVQk.[T]              | N-Term(iTRAQ4plex); K10(iTRAQ | 1 | 1 |
| [K].scAVAEGVYVv.[V]             | N-Term(iTRAQ4plex); C2(Carbam | 2 | 2 |
| [R].iLGGHLDak.[G]               | N-Term(iTRAQ4plex); K9(iTRAQ4 | 2 | 2 |
| [R].iLGGHLDak.[G]               | N-Term(iTRAQ4plex); K9(iTRAQ4 | 2 | 2 |
| [R].iLGGHLDak.[G]               | N-Term(iTRAQ4plex); K9(iTRAQ4 | 2 | 2 |

|                            |                                         |   |   |
|----------------------------|-----------------------------------------|---|---|
| [K].vVLHPNYHQVDIGLIK.[L]   | N-Term(iTRAQ4plex); K16(iTRAQ4plex)     | 1 | 1 |
| [R].iLGGHLDak.[G]          | N-Term(iTRAQ4plex); K9(iTRAQ4plex)      | 2 | 2 |
| [K].vTSIQHWVQk.[T]         | N-Term(iTRAQ4plex); K10(iTRAQ4plex)     | 1 | 1 |
| [K].diAPTLTLYVGk.[K]       | N-Term(iTRAQ4plex); K12(iTRAQ4plex)     | 2 | 2 |
| [K].diAPTLTLYVGk.[K]       | N-Term(iTRAQ4plex); K12(iTRAQ4plex)     | 2 | 2 |
| [K].DIAPTLTLYVGk.[K]       | K12(iTRAQ4plex)                         | 2 | 2 |
| [K].diAPTLTLYVGk.[K]       | N-Term(iTRAQ4plex); K12(iTRAQ4plex)     | 2 | 2 |
| [K].diAPTLTLYVGk.[K]       | N-Term(iTRAQ4plex); K12(iTRAQ4plex)     | 2 | 2 |
| [R].tEGDGVYTLNDk.[K]       | N-Term(iTRAQ4plex); K12(iTRAQ4plex)     | 2 | 2 |
| [R].tEGDGVYTLNDk.[K]       | N-Term(iTRAQ4plex); K12(iTRAQ4plex)     | 2 | 2 |
| [R].tEGDGVYTLNDk.[K]       | N-Term(iTRAQ4plex); K12(iTRAQ4plex)     | 2 | 2 |
| [K].scAVAEGVYVv.[V]        | N-Term(iTRAQ4plex); C2(Carbamidomethyl) | 2 | 2 |
| [K].scAVAEGVYVv.[V]        | N-Term(iTRAQ4plex); C2(Carbamidomethyl) | 2 | 2 |
| [K].scAVAEGVYVv.[V]        | N-Term(iTRAQ4plex); C2(Carbamidomethyl) | 2 | 2 |
| [K].scAVAEGVYVv.[V]        | N-Term(iTRAQ4plex); C2(Carbamidomethyl) | 2 | 2 |
| [K].scAVAEGVYVv.[V]        | N-Term(iTRAQ4plex); C2(Carbamidomethyl) | 2 | 2 |
| [K].scAVAEGVYVv.[V]        | N-Term(iTRAQ4plex); C2(Carbamidomethyl) | 2 | 2 |
| [K].scAVAEGVYVv.[V]        | N-Term(iTRAQ4plex); C2(Carbamidomethyl) | 2 | 2 |
| [K].scAVAEGVYVv.[V]        | N-Term(iTRAQ4plex); C2(Carbamidomethyl) | 2 | 2 |
| [K].scAVAEGVYVv.[V]        | N-Term(iTRAQ4plex); C2(Carbamidomethyl) | 2 | 2 |
| [K].scAVAEGVYVv.[V]        | N-Term(iTRAQ4plex); C2(Carbamidomethyl) | 2 | 2 |
| [K].scAVAEGVYVv.[V]        | N-Term(iTRAQ4plex); C2(Carbamidomethyl) | 2 | 2 |
| [K].scAVAEGVYVv.[V]        | N-Term(iTRAQ4plex); C2(Carbamidomethyl) | 2 | 2 |
| [R].vMPIcLPSk.[ND]         | N-Term(iTRAQ4plex); C5(Carbamidomethyl) | 2 | 2 |
| [K].IPEcEAVcGkPk.[N]       | N-Term(iTRAQ4plex); C4(Carbamidomethyl) | 2 | 2 |
| [K].IPEcEAVcGkPk.[N]       | N-Term(iTRAQ4plex); C4(Carbamidomethyl) | 2 | 2 |
| [K].kQLVEIEk.[V]           | N-Term(iTRAQ4plex); K1(iTRAQ4plex)      | 2 | 2 |
| [K].diAPTLTLYVGkk.[Q]      | N-Term(iTRAQ4plex); K12(iTRAQ4plex)     | 2 | 2 |
| [R].VMPicLPSk.[ND]         | C5(Carbamidomethyl); K9(iTRAQ4plex)     | 2 | 2 |
| [R].qLFALYSGNDVTDISDDR.[F] | N-Term(iTRAQ4plex)                      | 1 | 1 |
| [K].scAVAEGVYVv.[V]        | N-Term(iTRAQ4plex); C2(Carbamidomethyl) | 2 | 2 |
| [K].diAPTLTLYVGk.[K]       | N-Term(iTRAQ4plex); K12(iTRAQ4plex)     | 2 | 2 |
| [K].gSFPWQak.[M]           | N-Term(iTRAQ4plex); K8(iTRAQ4plex)      | 2 | 2 |
| [K].gSFPWQak.[M]           | N-Term(iTRAQ4plex); K8(iTRAQ4plex)      | 2 | 2 |
| [K].gSFPWQak.[M]           | N-Term(iTRAQ4plex); K8(iTRAQ4plex)      | 2 | 2 |
| [K].scAVAEGVYVv.[V]        | N-Term(iTRAQ4plex); C2(Carbamidomethyl) | 2 | 2 |
| [R].vMPIcLPSk.[ND]         | N-Term(iTRAQ4plex); C5(Carbamidomethyl) | 2 | 2 |
| [R].VMPicLPSk.[ND]         | C5(Carbamidomethyl); K9(iTRAQ4plex)     | 2 | 2 |
| [R].iLGGHLDak.[G]          | N-Term(iTRAQ4plex); K9(iTRAQ4plex)      | 2 | 2 |
| [K].diAPTLTLYVGk.[K]       | N-Term(iTRAQ4plex); K12(iTRAQ4plex)     | 2 | 2 |
| [R].vMPIcLPSk.[ND]         | N-Term(iTRAQ4plex); C5(Carbamidomethyl) | 2 | 2 |
| [R].vmPcLPSk.[ND]          | N-Term(iTRAQ4plex); M2(Oxidation)       | 2 | 2 |
| [R].iLGGHLDak.[G]          | N-Term(iTRAQ4plex); K9(iTRAQ4plex)      | 2 | 2 |
| [K].QLVEIEk.[V]            | K7(iTRAQ4plex)                          | 2 | 2 |
| [R].iLGGHLDak.[G]          | N-Term(iTRAQ4plex); K9(iTRAQ4plex)      | 2 | 2 |
| [R].iLGGHLDak.[G]          | N-Term(iTRAQ4plex); K9(iTRAQ4plex)      | 2 | 2 |
| [R].TEGDGVYTLNDk.[K]       | K12(iTRAQ4plex)                         | 2 | 2 |
| [K].qLVEIEk.[V]            | N-Term(iTRAQ4plex); K7(iTRAQ4plex)      | 2 | 2 |
| [R].iLGGHLDak.[G]          | K9(iTRAQ4plex)                          | 2 | 2 |
| [K].gSFPWQak.[M]           | N-Term(iTRAQ4plex); K8(iTRAQ4plex)      | 2 | 2 |
| [R].VMPicLPSk.[ND]         | C5(Carbamidomethyl); K9(iTRAQ4plex)     | 2 | 2 |
| [K].gSFPWQak.[M]           | N-Term(iTRAQ4plex); K8(iTRAQ4plex)      | 2 | 2 |
| [K].gSFPWQak.[M]           | N-Term(iTRAQ4plex); K8(iTRAQ4plex)      | 2 | 2 |

|                                    |                                |   |   |
|------------------------------------|--------------------------------|---|---|
| [K].vTSIQHWVQk.[T]                 | N-Term(iTRAQ4plex); K10(iTRAQ4 | 1 | 1 |
| [K].gSFPWQak.[M]                   | N-Term(iTRAQ4plex); K8(iTRAQ4  | 2 | 2 |
| [R].tEGDGVYTLNDk.[K]               | N-Term(iTRAQ4plex); K12(iTRAQ4 | 2 | 2 |
| [R].vmPlcLPSk.[ND]                 | N-Term(iTRAQ4plex); M2(Oxidati | 2 | 2 |
| [K].qLVEIEk.[V]                    | N-Term(iTRAQ4plex); K7(iTRAQ4  | 2 | 2 |
| [K].gPSVFPLAPcSR.[S]               | N-Term(iTRAQ4plex); C10(Carbar | 3 | 3 |
| [K].gPSVFPLAPcSR.[S]               | N-Term(iTRAQ4plex); C10(Carbar | 3 | 3 |
| [K].wYVDGVEVHNAk.[T]               | N-Term(iTRAQ4plex); K12(iTRAQ4 | 1 | 1 |
| [KR].sTSGGTAALGcLVk.[D]            | N-Term(iTRAQ4plex); C11(Carbar | 2 | 2 |
| [K].wYVDGVEVHNAk.[T]               | N-Term(iTRAQ4plex); K12(iTRAQ4 | 1 | 1 |
| [KR].sTSGGTAALGcLVk.[D]            | N-Term(iTRAQ4plex); C11(Carbar | 2 | 2 |
| [K].gPSVFPLAPcSR.[S]               | N-Term(iTRAQ4plex); C10(Carbar | 3 | 3 |
| [K].nQVSLTcLVk.[G]                 | N-Term(iTRAQ4plex); C7(Carbam  | 4 | 4 |
| [K].nQVSLTcLVk.[G]                 | N-Term(iTRAQ4plex); C7(Carbam  | 4 | 4 |
| [K].tPLGDTHHTcPR.[C]               | N-Term(iTRAQ4plex); C10(Carbar | 1 | 1 |
| [K].aLPAPIEk.[T]                   | N-Term(iTRAQ4plex); K8(iTRAQ4  | 2 | 2 |
| [K].scDTPPPcPR.[C]                 | N-Term(iTRAQ4plex); C2(Carbam  | 1 | 1 |
| [R].ePQVYTLPPSR.[DE]               | N-Term(iTRAQ4plex)             | 3 | 3 |
| [R].ePQVYTLPPSR.[DE]               | N-Term(iTRAQ4plex)             | 3 | 3 |
| [R].ePQVYTLPPSR.[DE]               | N-Term(iTRAQ4plex)             | 3 | 3 |
| [R].ePQVYTLPPSR.[DE]               | N-Term(iTRAQ4plex)             | 3 | 3 |
| [R].ePQVYTLPPSR.[DE]               | N-Term(iTRAQ4plex)             | 3 | 3 |
| [R].ePQVYTLPPSR.[DE]               | N-Term(iTRAQ4plex)             | 3 | 3 |
| [R].ePQVYTLPPSR.[DE]               | N-Term(iTRAQ4plex)             | 3 | 3 |
| [R].ePQVYTLPPSR.[DE]               | N-Term(iTRAQ4plex)             | 3 | 3 |
| [KR].sTSGGTAALGcLVk.[D]            | N-Term(iTRAQ4plex); C11(Carbar | 2 | 2 |
| [K].aLPAPIEk.[T]                   | N-Term(iTRAQ4plex); K8(iTRAQ4  | 2 | 2 |
| [K].DTLmISR.[T]                    | M4(Oxidation)                  | 4 | 4 |
| [R].ePQVYTLPPSR.[DE]               | N-Term(iTRAQ4plex)             | 3 | 3 |
| [R].sTSESTAALGcLVk.[D]             | N-Term(iTRAQ4plex); C11(Carbar | 2 | 2 |
| [R].sTSESTAALGcLVk.[D]             | N-Term(iTRAQ4plex); C11(Carbar | 2 | 2 |
| [K].gPSVFPLAPcSR.[S]               | N-Term(iTRAQ4plex); C10(Carbar | 3 | 3 |
| [K].gPSVFPLAPcSR.[S]               | N-Term(iTRAQ4plex); C10(Carbar | 3 | 3 |
| [K].tTPPMLDSDGSFFLYSk.[L]          | N-Term(iTRAQ4plex); K17(iTRAQ4 | 1 | 1 |
| [K].gPSVFPLAPcSR.[S]               | N-Term(iTRAQ4plex); C10(Carbar | 3 | 3 |
| [K].nQVSLTcLVk.[G]                 | N-Term(iTRAQ4plex); C7(Carbam  | 4 | 4 |
| [K].nQVSLTcLVk.[G]                 | N-Term(iTRAQ4plex); C7(Carbam  | 4 | 4 |
| [K].ccVEcPPcPAPPVAGPSVFLFPPkPk.[D] | N-Term(iTRAQ4plex); C1(Carbam  | 1 | 1 |
| [R].ePQVYTLPPSR.[DE]               | N-Term(iTRAQ4plex)             | 3 | 3 |
| [R].ePQVYTLPPSR.[DE]               | N-Term(iTRAQ4plex)             | 3 | 3 |
| [R].ePQVYTLPPSR.[DE]               | N-Term(iTRAQ4plex)             | 3 | 3 |
| [R].ePQVYTLPPSR.[DE]               | N-Term(iTRAQ4plex)             | 3 | 3 |
| [R].ePQVYTLPPSR.[DE]               | N-Term(iTRAQ4plex)             | 3 | 3 |
| [R].ePQVYTLPPSR.[DE]               | N-Term(iTRAQ4plex)             | 3 | 3 |
| [R].ePQVYTLPPSR.[DE]               | N-Term(iTRAQ4plex)             | 3 | 3 |
| [R].sTSESTAALGcLVk.[D]             | N-Term(iTRAQ4plex); C11(Carbar | 2 | 2 |
| [R].ePQVYTLPPSR.[DE]               | N-Term(iTRAQ4plex)             | 3 | 3 |
| [K].gLPAPIEk.[T]                   | N-Term(iTRAQ4plex); K8(iTRAQ4  | 1 | 1 |
| [K].gLPAPIEk.[T]                   | N-Term(iTRAQ4plex); K8(iTRAQ4  | 1 | 1 |
| [K].ccVEcPPcPAPPVAGPSVFLFPPkPk.[D] | N-Term(iTRAQ4plex); C1(Carbam  | 1 | 1 |
| [K].DTLmISR.[T]                    | M4(Oxidation)                  | 4 | 4 |
| [K].tTPPMLDSDGSFFLYSk.[L]          | N-Term(iTRAQ4plex); K17(iTRAQ4 | 1 | 1 |
| [R].ePQVYTLPPSR.[DE]               | N-Term(iTRAQ4plex)             | 3 | 3 |
| [R].sGVQQLIQYYQDQk.[D]             | N-Term(iTRAQ4plex); K14(iTRAQ4 | 1 | 1 |

|                           |                                     |   |    |
|---------------------------|-------------------------------------|---|----|
| [R].sGVQQLIQYYQDQk.[D]    | N-Term(iTRAQ4plex); K14(iTRAQ4plex) | 1 | 1  |
| [R].sGVQQLIQYYQDQk.[D]    | N-Term(iTRAQ4plex); K14(iTRAQ4plex) | 1 | 1  |
| [K].sYDLDPGAGSLEI.[-]     | N-Term(iTRAQ4plex)                  | 1 | 1  |
| [R].sLPTEDcENEk.[E]       | N-Term(iTRAQ4plex); C7(Carbamid)    | 1 | 1  |
| [R].sLPTEDcENEk.[E]       | N-Term(iTRAQ4plex); C7(Carbamid)    | 1 | 1  |
| [R].sLPTEDcENEk.[E]       | N-Term(iTRAQ4plex); C7(Carbamid)    | 1 | 1  |
| [R].IVGGPMDASVEEEGVR.[R]  | N-Term(iTRAQ4plex)                  | 1 | 1  |
| [R].IVGGPMDASVEEEGVR.[R]  | N-Term(iTRAQ4plex)                  | 1 | 1  |
| [R].IVGGPMDASVEEEGVR.[R]  | N-Term(iTRAQ4plex); M6(Oxidation)   | 1 | 1  |
| [R].aLDFAVGEYnk.[A]       | N-Term(iTRAQ4plex); K11(iTRAQ4plex) | 1 | 1  |
| [K].aSNDMYHSR.[A]         | N-Term(iTRAQ4plex)                  | 1 | 1  |
| [K].niQSLEVIgk.[G]        | N-Term(iTRAQ4plex); K10(iTRAQ4plex) | 1 | 1  |
| [K].niQSLEVIgk.[G]        | N-Term(iTRAQ4plex); K10(iTRAQ4plex) | 1 | 1  |
| [K].gTHcNQVEVIATLk.[D]    | N-Term(iTRAQ4plex); C4(Carbamid)    | 1 | 1  |
| [K].tTSGIHpk.[N]          | N-Term(iTRAQ4plex); K8(iTRAQ4plex)  | 1 | 1  |
| [K].gTHcNQVEVIATLk.[D]    | N-Term(iTRAQ4plex); C4(Carbamid)    | 1 | 1  |
| [K].wNDDAcHk.[L]          | N-Term(iTRAQ4plex); C6(Carbamid)    | 1 | 1  |
| [K].sLTEEAENWGDGEPNNk.[K] | N-Term(iTRAQ4plex); K17(iTRAQ4plex) | 1 | 1  |
| [K].sLTEEAENWGDGEPNNk.[K] | N-Term(iTRAQ4plex); K17(iTRAQ4plex) | 1 | 1  |
| [R].sYYWIGIR.[K]          | N-Term(iTRAQ4plex)                  | 1 | 1  |
| [R].aTSGTEHQFcGGR.[L]     | N-Term(iTRAQ4plex); C10(Carbamid)   | 1 | 1  |
| [K].tEESPSAPDAPTcPk.[Q]   | N-Term(iTRAQ4plex); C13(Carbamid)   | 1 | 1  |
| [K].tGGLDLPSPTGASLk.[F]   | N-Term(iTRAQ4plex); K16(iTRAQ4plex) | 1 | 1  |
| [R].cINQLLck.[L]          | N-Term(iTRAQ4plex); C1(Carbamid)    | 1 | 1  |
| [K].dDFLIYDR.[C]          | N-Term(iTRAQ4plex)                  | 1 | 1  |
| [R].cINQLLck.[L]          | N-Term(iTRAQ4plex); C1(Carbamid)    | 1 | 1  |
| [K].rVSLATVdk.[T]         | N-Term(iTRAQ4plex); K9(iTRAQ4plex)  | 1 | 1  |
| [K].dDFLIYDR.[C]          | N-Term(iTRAQ4plex)                  | 1 | 1  |
| [R].yGFIEGHVVIPR.[I]      | N-Term(iTRAQ4plex)                  | 1 | 1  |
| [R].yGFIEGHVVIPR.[I]      | N-Term(iTRAQ4plex)                  | 1 | 1  |
| [R].fAGVFHVEk.[N]         | N-Term(iTRAQ4plex); K9(iTRAQ4plex)  | 1 | 1  |
| [R].fAGVFHVEk.[N]         | N-Term(iTRAQ4plex); K9(iTRAQ4plex)  | 1 | 1  |
| [R].tEAADLck.[A]          | N-Term(iTRAQ4plex); C7(Carbamid)    | 1 | 1  |
| [R].aFQYHsk.[E]           | N-Term(iTRAQ4plex); K7(iTRAQ4plex)  | 1 | 3  |
| [R].mRDVVLFEk.[-K]        | N-Term(iTRAQ4plex); K9(iTRAQ4plex)  | 1 | 2  |
| [R].aFQYHsk.[E]           | N-Term(iTRAQ4plex); K7(iTRAQ4plex)  | 1 | 3  |
| [R].dVVLFEk.[-K]          | N-Term(iTRAQ4plex); K7(iTRAQ4plex)  | 1 | 2  |
| [R].dVVLFEk.[-K]          | N-Term(iTRAQ4plex); K7(iTRAQ4plex)  | 1 | 2  |
| [R].aFQYHsk.[E]           | N-Term(iTRAQ4plex); K7(iTRAQ4plex)  | 1 | 3  |
| [R].aFQYHsk.[E]           | N-Term(iTRAQ4plex); K7(iTRAQ4plex)  | 1 | 3  |
| [R].aFQYHsk.[E]           | N-Term(iTRAQ4plex); K7(iTRAQ4plex)  | 1 | 3  |
| [R].vDLVDFEDNYQFAk.[Y]    | N-Term(iTRAQ4plex); K14(iTRAQ4plex) | 1 | 1  |
| [R].vDLVDFEDNYQFAk.[Y]    | N-Term(iTRAQ4plex); K14(iTRAQ4plex) | 1 | 1  |
| [R].vDGSVDfYR.[D]         | N-Term(iTRAQ4plex)                  | 1 | 1  |
| [K].vADEAEk.[Y]           | N-Term(iTRAQ4plex); K7(iTRAQ4plex)  | 1 | 2  |
| [K].eiTALAPSTMk.[I]       | N-Term(iTRAQ4plex); K11(iTRAQ4plex) | 1 | 6  |
| [R].hQGVMVGMGQk.[D]       | N-Term(iTRAQ4plex); K11(iTRAQ4plex) | 1 | 7  |
| [KR].sYELPDGQVITIGNER.[F] | N-Term(iTRAQ4plex)                  | 1 | 10 |
| [K].eiTALAPSTMk.[I]       | N-Term(iTRAQ4plex); K11(iTRAQ4plex) | 1 | 6  |
| [R].hQGVMVGMGQk.[D]       | N-Term(iTRAQ4plex); K11(iTRAQ4plex) | 1 | 7  |
| [KR].sYELPDGQVITIGNER.[F] | N-Term(iTRAQ4plex)                  | 1 | 10 |
| [K].sPWcDVFDIDDAk.[V]     | N-Term(iTRAQ4plex); C4(Carbamid)    | 1 | 1  |

|                           |                                |   |    |
|---------------------------|--------------------------------|---|----|
| [R].qLHGLLQAR.[G]         | N-Term(iTRAQ4plex)             | 1 | 1  |
| [K].dILQScQTSEEcELAR.[A]  | N-Term(iTRAQ4plex); C6(Carbam  | 1 | 1  |
| [R].sQYEQLAEQNR.[K]       | N-Term(iTRAQ4plex)             | 1 | 1  |
| [R].aLEESNYELEGk.[I]      | N-Term(iTRAQ4plex); K12(iTRAQ  | 1 | 1  |
| [KR].LAADDFR.[AITLV]      |                                | 1 | 17 |
| [R].fVTAVGTQGAISk.[E]     | N-Term(iTRAQ4plex); K13(iTRAQ  | 1 | 1  |
| [R].ikPATWETGISMR.[F]     | N-Term(iTRAQ4plex); K2(iTRAQ4  | 1 | 1  |
| [R].gIIQGGk.[H]           | N-Term(iTRAQ4plex); K8(iTRAQ4  | 1 | 1  |
| [K].dQVETAlk.[A]          | N-Term(iTRAQ4plex); K8(iTRAQ4  | 1 | 1  |
| [R].ILGLSLAGk.[D]         | N-Term(iTRAQ4plex); K9(iTRAQ4  | 1 | 1  |
| [R].iMGITLVSk.[K]         | N-Term(iTRAQ4plex); K9(iTRAQ4  | 1 | 1  |
| [R].nEVWWTIDGk.[K]        | N-Term(iTRAQ4plex); K10(iTRAQ  | 1 | 1  |
| [R].tQILSIk.[K]           | N-Term(iTRAQ4plex); K7(iTRAQ4  | 1 | 1  |
| [K].vAFPLEVVQk.[D]        | N-Term(iTRAQ4plex); K10(iTRAQ  | 1 | 1  |
| [R].vYVSGLMk.[G]          | N-Term(iTRAQ4plex); K8(iTRAQ4  | 1 | 1  |
| [K].gLFEVNPWk.[R]         | N-Term(iTRAQ4plex); K9(iTRAQ4  | 1 | 1  |
| [K].ILLSSETPIEGk.[N]      | N-Term(iTRAQ4plex); K12(iTRAQ  | 1 | 1  |
| [R].ISQLSVTDVTTSSLR.[L]   | N-Term(iTRAQ4plex)             | 1 | 2  |
| [R].IGPISADSTTAPLEK.[E]   | N-Term(iTRAQ4plex); K15(iTRAQ  | 1 | 1  |
| [R].tLSPVLESPR.[D]        | N-Term(iTRAQ4plex)             | 1 | 2  |
| [K].qEYDESGPSIVHR.[K]     | N-Term(iTRAQ4plex)             | 1 | 7  |
| [KR].sYELPDGQVITIGNER.[F] | N-Term(iTRAQ4plex)             | 1 | 10 |
| [K].IWHHTFYNELR.[V]       |                                | 1 | 9  |
| [K].qEYDESGPSIVHR.[K]     | N-Term(iTRAQ4plex)             | 1 | 7  |
| [KR].sYELPDGQVITIGNER.[F] | N-Term(iTRAQ4plex)             | 1 | 10 |
| [K].IWHHTFYNELR.[V]       |                                | 1 | 9  |
| [K].qEYDESGPSIVHR.[K]     | N-Term(iTRAQ4plex)             | 1 | 7  |
| [KR].sYELPDGQVITIGNER.[F] | N-Term(iTRAQ4plex)             | 1 | 10 |
| [K].IWHHTFYNELR.[V]       |                                | 1 | 9  |
| [R].eIIkPAEk.[S]          | N-Term(iTRAQ4plex); K4(iTRAQ4  | 1 | 1  |
| [R].iITGPEIk.[Y]          | N-Term(iTRAQ4plex); K8(iTRAQ4  | 1 | 1  |
| [K].qVIELAGk.[Q]          | N-Term(iTRAQ4plex); K8(iTRAQ4  | 1 | 1  |
| [R].IFAYPDTHR.[H]         | N-Term(iTRAQ4plex)             | 1 | 1  |
| [R].dPILFPSFIHSQk.[R]     | N-Term(iTRAQ4plex); K13(iTRAQ  | 1 | 1  |
| [R].IGPNYLHIPVNCpYR.[A]   | N-Term(iTRAQ4plex); C12(Carbar | 1 | 1  |
| [R].YQLGSGEAR.[L]         |                                | 1 | 1  |
| [R].IPAVEPTDQAQYLcR.[A]   | N-Term(iTRAQ4plex); C14(Carbar | 1 | 1  |
| [R].aLEVEEcR.[C]          | N-Term(iTRAQ4plex); C7(Carbam  | 1 | 1  |
| [R].gSFEPVGDVAVSk.[V]     | N-Term(iTRAQ4plex); K13(iTRAQ  | 2 | 2  |
| [R].gSFEPVGDVAVSk.[V]     | N-Term(iTRAQ4plex); K13(iTRAQ  | 2 | 2  |
| [R].gSFEPVGDVAVSk.[V]     | N-Term(iTRAQ4plex); K13(iTRAQ  | 2 | 2  |
| [R].gSFEPVGDVAVSk.[V]     | N-Term(iTRAQ4plex); K13(iTRAQ  | 2 | 2  |
| [R].gSFEPVGDVAVSk.[V]     | N-Term(iTRAQ4plex); K13(iTRAQ  | 2 | 2  |
| [R].YIYGkPVQGVAVYR.[F]    | K5(iTRAQ4plex)                 | 2 | 2  |
| [R].yLDkTEQWSTLPPETk.[D]  | N-Term(iTRAQ4plex); K4(iTRAQ4  | 2 | 2  |
| [R].gSFEPVGDVAVSk.[V]     | N-Term(iTRAQ4plex); K13(iTRAQ  | 2 | 2  |
| [K].vLSLAQEQVGGSPek.[L]   | N-Term(iTRAQ4plex); K15(iTRAQ  | 2 | 2  |
| [K].vLSLAQEQVGGSPek.[L]   | N-Term(iTRAQ4plex); K15(iTRAQ  | 2 | 2  |
| [K].vLSLAQEQVGGSPek.[L]   | N-Term(iTRAQ4plex); K15(iTRAQ  | 2 | 2  |
| [K].vLSLAQEQVGGSPek.[L]   | N-Term(iTRAQ4plex); K15(iTRAQ  | 2 | 2  |
| [R].tYNVLDMk.[N]          | N-Term(iTRAQ4plex); K8(iTRAQ4  | 2 | 2  |

|                                |                               |   |   |
|--------------------------------|-------------------------------|---|---|
| [R].vHYTVciWR.[N]              | N-Term(iTRAQ4plex); C6(Carbam | 2 | 2 |
| [R].VGDTLNLNLR.[A]             |                               | 2 | 2 |
| [R].tYNVLDmk.[N]               | N-Term(iTRAQ4plex); K8(iTRAQ4 | 2 | 2 |
| [R].yLDkTEQWSTLPPETk.[D]       | N-Term(iTRAQ4plex); K4(iTRAQ4 | 2 | 2 |
| [R].yLDkTEQWSTLPPETk.[D]       | N-Term(iTRAQ4plex); K4(iTRAQ4 | 2 | 2 |
| [R].yLDkTEQWSTLPPETk.[D]       | N-Term(iTRAQ4plex); K4(iTRAQ4 | 2 | 2 |
| [R].yLDkTEQWSTLPPETk.[D]       | N-Term(iTRAQ4plex); K4(iTRAQ4 | 2 | 2 |
| [R].yLDkTEQWSTLPPETk.[D]       | N-Term(iTRAQ4plex); K4(iTRAQ4 | 2 | 2 |
| [R].rGHLFLQTDQPIYNPGQR.[V]     | N-Term(iTRAQ4plex)            | 2 | 2 |
| [R].rGHLFLQTDQPIYNPGQR.[V]     | N-Term(iTRAQ4plex)            | 2 | 2 |
| [R].gHLFLQTDQPIYNPGQR.[V]      | N-Term(iTRAQ4plex)            | 2 | 2 |
| [K].ITQVLHFTk.[D]              | K9(iTRAQ4plex)                | 2 | 2 |
| [K].ScGLHQLLR.[G]              | C2(Carbamidomethyl)           | 2 | 2 |
| [R].FGLLEDGk.[T]               | K9(iTRAQ4plex); K10(iTRAQ4ple | 2 | 2 |
| [K].shKPLNMGk.[V]              | N-Term(iTRAQ4plex); K3(iTRAQ4 | 2 | 2 |
| [K].IGQYASPTak.[R]             | N-Term(iTRAQ4plex); K10(iTRAQ | 2 | 2 |
| [K].IVNGQSHISLsk.[A]           | N-Term(iTRAQ4plex); K12(iTRAQ | 2 | 2 |
| [R].kADGSYAAWLSR.[DG]          | K1(iTRAQ4plex)                | 2 | 2 |
| [R].kADGSYAAWLSR.[DG]          | N-Term(iTRAQ4plex)            | 2 | 2 |
| [R].kADGSYAAWLSR.[DG]          | N-Term(iTRAQ4plex)            | 2 | 2 |
| [R].kADGSYAAWLSR.[DG]          | K1(iTRAQ4plex)                | 2 | 2 |
| [R].tLEIPGNSDPNmIPDGFNSYVR.[V] | N-Term(iTRAQ4plex); M12(Oxida | 2 | 2 |
| [K].shALQLNnr.[Q]              | N-Term(iTRAQ4plex)            | 2 | 2 |
| [K].shKPLNMGk.[V]              | N-Term(iTRAQ4plex); K3(iTRAQ4 | 2 | 2 |
| [R].tLEIPGNSDPNMIPDGFNSYVR.[V] | N-Term(iTRAQ4plex)            | 2 | 2 |
| [R].tLEIPGNSDPNMIPDGFNSYVR.[V] | N-Term(iTRAQ4plex)            | 2 | 2 |
| [R].TLEIPGNSDPNMIPDGFNSYVR.[V] |                               | 2 | 2 |
| [R].gLEELQFSLGsk.[I]           | N-Term(iTRAQ4plex); K13(iTRAQ | 2 | 2 |
| [R].gLEELQFSLGsk.[I]           | N-Term(iTRAQ4plex); K13(iTRAQ | 2 | 2 |
| [R].gLEELQFSLGsk.[I]           | N-Term(iTRAQ4plex); K13(iTRAQ | 2 | 2 |
| [R].gLEELQFSLGsk.[I]           | N-Term(iTRAQ4plex); K13(iTRAQ | 2 | 2 |
| [R].gLEELQFSLGsk.[I]           | N-Term(iTRAQ4plex); K13(iTRAQ | 2 | 2 |
| [R].gLEELQFSLGsk.[I]           | N-Term(iTRAQ4plex); K13(iTRAQ | 2 | 2 |
| [R].gLEELQFSLGsk.[I]           | N-Term(iTRAQ4plex); K13(iTRAQ | 2 | 2 |
| [R].eELVYELNPLDHR.[G]          | N-Term(iTRAQ4plex)            | 2 | 2 |
| [R].eELVYELNPLDHR.[G]          | N-Term(iTRAQ4plex)            | 2 | 2 |
| [R].eELVYELNPLDHR.[G]          | N-Term(iTRAQ4plex)            | 2 | 2 |
| [R].eELVYELNPLDHR.[G]          | N-Term(iTRAQ4plex)            | 2 | 2 |
| [R].cSVFYGAPsk.[S]             | N-Term(iTRAQ4plex); C1(Carbam | 2 | 2 |
| [R].cSVFYGAPsk.[S]             | N-Term(iTRAQ4plex); C1(Carbam | 2 | 2 |
| [R].vHYTVciWR.[N]              | N-Term(iTRAQ4plex); C6(Carbam | 2 | 2 |
| [K].vDFTLSSER.[D]              | N-Term(iTRAQ4plex)            | 2 | 2 |
| [R].vHYTVciWR.[N]              | N-Term(iTRAQ4plex); C6(Carbam | 2 | 2 |
| [R].vHYTVciWR.[N]              | N-Term(iTRAQ4plex); C6(Carbam | 2 | 2 |
| [R].kADGSYAAWLSR.[DG]          | K1(iTRAQ4plex)                | 2 | 2 |
| [K].ITQVLHFTk.[D]              | N-Term(iTRAQ4plex); K9(iTRAQ4 | 2 | 2 |
| [K].ITQVLHFTk.[D]              | N-Term(iTRAQ4plex); K9(iTRAQ4 | 2 | 2 |
| [R].kADGSYAAWLSR.[DG]          | N-Term(iTRAQ4plex)            | 2 | 2 |
| [K].ITQVLHFTk.[D]              | N-Term(iTRAQ4plex); K9(iTRAQ4 | 2 | 2 |
| [R].GHLFLQTDQPIYNPGQR.[V]      |                               | 2 | 2 |
| [K].mRPSTDTITVMVENSHGLR.[V]    | N-Term(iTRAQ4plex)            | 2 | 2 |
| [K].shKPLNMGk.[V]              | N-Term(iTRAQ4plex); K3(iTRAQ4 | 2 | 2 |

|                                   |                               |   |   |
|-----------------------------------|-------------------------------|---|---|
| [K].sHkPLNMGk.[V]                 | N-Term(iTRAQ4plex); K3(iTRAQ4 | 2 | 2 |
| [R].aLEILQEEDLIDEDDIPVR.[S]       | N-Term(iTRAQ4plex)            | 2 | 2 |
| [R].kADGSYAAWLSR.[DG]             | N-Term(iTRAQ4plex); K1(iTRAQ4 | 2 | 2 |
| [K].mRPSTDTITVMVENSHGLR.[V]       | N-Term(iTRAQ4plex); M1(Oxidat | 2 | 2 |
| [R].rGHLFLQTDQPIYNPGQR.[V]        | N-Term(iTRAQ4plex)            | 2 | 2 |
| [R].rGHLFLQTDQPIYNPGQR.[V]        | N-Term(iTRAQ4plex)            | 2 | 2 |
| [R].rGHLFLQTDQPIYNPGQR.[V]        | N-Term(iTRAQ4plex)            | 2 | 2 |
| [R].rGHLFLQTDQPIYNPGQR.[V]        | N-Term(iTRAQ4plex)            | 2 | 2 |
| [R].yIYGkPVQGVAYVR.[F]            | N-Term(iTRAQ4plex); K5(iTRAQ4 | 2 | 2 |
| [R].yIYGkPVQGVAYVR.[F]            | N-Term(iTRAQ4plex); K5(iTRAQ4 | 2 | 2 |
| [R].rGHLFLQTDQPIYNPGQR.[V]        | N-Term(iTRAQ4plex)            | 2 | 2 |
| [R].rGHLFLQTDQPIYNPGQR.[V]        | N-Term(iTRAQ4plex)            | 2 | 2 |
| [K].scGLHQLLR.[G]                 | N-Term(iTRAQ4plex); C2(Carbam | 2 | 2 |
| [K].scGLHQLLR.[G]                 | N-Term(iTRAQ4plex); C2(Carbam | 2 | 2 |
| [K].scGLHQLLR.[G]                 | N-Term(iTRAQ4plex); C2(Carbam | 2 | 2 |
| [K].dDPDAPLQPVTPLQLFEGR.[R]       | N-Term(iTRAQ4plex)            | 2 | 2 |
| [K].dDPDAPLQPVTPLQLFEGR.[R]       | N-Term(iTRAQ4plex)            | 2 | 2 |
| [R].ecVGFEAVQEVVGLVQPASATLYDYYNPE | N-Term(iTRAQ4plex); C2(Carbam | 2 | 2 |
| [R].ecVGFEAVQEVVGLVQPASATLYDYYNPE | N-Term(iTRAQ4plex); C2(Carbam | 2 | 2 |
| [K].sHALQLNNR.[Q]                 | N-Term(iTRAQ4plex)            | 2 | 2 |
| [K].IVNGQSHISLsk.[A]              | N-Term(iTRAQ4plex); K12(iTRAQ | 2 | 2 |
| [K].yVLPNFEVk.[I]                 | N-Term(iTRAQ4plex); K9(iTRAQ4 | 2 | 2 |
| [R].gPEVQLVAHSPWLk.[D]            | N-Term(iTRAQ4plex); K14(iTRAQ | 2 | 2 |
| [R].gPEVQLVAHSPWLk.[D]            | N-Term(iTRAQ4plex); K14(iTRAQ | 2 | 2 |
| [R].ILATLcSAEVcQcAEGk.[C]         | N-Term(iTRAQ4plex); C6(Carbam | 2 | 2 |
| [R].gcGEQTMiYLAPTLAASR.[Y]        | N-Term(iTRAQ4plex); C2(Carbam | 2 | 2 |
| [R].gPEVQLVAHSPWLk.[D]            | N-Term(iTRAQ4plex); K14(iTRAQ | 2 | 2 |
| [R].gPEVQLVAHSPWLk.[D]            | N-Term(iTRAQ4plex); K14(iTRAQ | 2 | 2 |
| [R].yVSHFETEGPHVLLYFDSVPTSR.[E]   | N-Term(iTRAQ4plex)            | 2 | 2 |
| [K].mRPSTDTITVMVENSHGLR.[V]       | N-Term(iTRAQ4plex)            | 2 | 2 |
| [K].mRPSTDTITVMVENSHGLR.[V]       | N-Term(iTRAQ4plex)            | 2 | 2 |
| [K].mRPSTDTITVMVENSHGLR.[V]       | N-Term(iTRAQ4plex)            | 2 | 2 |
| [K].mRPSTDTITVMVENSHGLR.[V]       | N-Term(iTRAQ4plex)            | 2 | 2 |
| [R].yVSHFETEGPHVLLYFDSVPTSR.[E]   | N-Term(iTRAQ4plex)            | 2 | 2 |
| [R].yVSHFETEGPHVLLYFDSVPTSR.[E]   | N-Term(iTRAQ4plex)            | 2 | 2 |
| [K].mRPSTDTITVMVENSHGLR.[V]       | N-Term(iTRAQ4plex)            | 2 | 2 |
| [R].yVSHFETEGPHVLLYFDSVPTSR.[E]   | N-Term(iTRAQ4plex)            | 2 | 2 |
| [K].kYVLPNFEVk.[I]                | N-Term(iTRAQ4plex); K1(iTRAQ4 | 2 | 2 |
| [K].mRPSTDTITVMVENSHGLR.[V]       | N-Term(iTRAQ4plex)            | 2 | 2 |
| [K].kYVLPNFEVk.[I]                | N-Term(iTRAQ4plex); K1(iTRAQ4 | 2 | 2 |
| [R].gHLFLQTDQPIYNPGQR.[V]         | N-Term(iTRAQ4plex)            | 2 | 2 |
| [K].kYVLPNFEVk.[I]                | N-Term(iTRAQ4plex); K1(iTRAQ4 | 2 | 2 |
| [K].kYVLPNFEVk.[I]                | N-Term(iTRAQ4plex); K1(iTRAQ4 | 2 | 2 |
| [R].gHLFLQTDQPIYNPGQR.[V]         | N-Term(iTRAQ4plex)            | 2 | 2 |
| [R].gHLFLQTDQPIYNPGQR.[V]         | N-Term(iTRAQ4plex)            | 2 | 2 |
| [K].gLcVATPVQLR.[V]               | N-Term(iTRAQ4plex); C3(Carbam | 2 | 2 |
| [K].gLcVATPVQLR.[V]               | N-Term(iTRAQ4plex); C3(Carbam | 2 | 2 |
| [R].vGDTLNLNLR.[A]                | N-Term(iTRAQ4plex)            | 2 | 2 |
| [K].gLcVATPVQLR.[V]               | N-Term(iTRAQ4plex); C3(Carbam | 2 | 2 |
| [K].gLcVATPVQLR.[V]               | N-Term(iTRAQ4plex); C3(Carbam | 2 | 2 |
| [K].kYVLPNFEVk.[I]                | N-Term(iTRAQ4plex); K1(iTRAQ4 | 2 | 2 |
| [R].gHLFLQTDQPIYNPGQR.[V]         | N-Term(iTRAQ4plex)            | 2 | 2 |



|                                     |                                           |   |   |
|-------------------------------------|-------------------------------------------|---|---|
| [R].yVSHFETEGPHVLLYFDSVPTSR.[E]     | N-Term(iTRAQ4plex)                        | 2 | 2 |
| [R].gPEVQLVAHSPWLk.[D]              | N-Term(iTRAQ4plex); K14(iTRAQ4plex)       | 2 | 2 |
| [R].gPEVQLVAHSPWLk.[D]              | N-Term(iTRAQ4plex); K14(iTRAQ4plex)       | 2 | 2 |
| [R].gPEVQLVAHSPWLk.[D]              | N-Term(iTRAQ4plex); K14(iTRAQ4plex)       | 2 | 2 |
| [R].gPEVQLVAHSPWLk.[D]              | N-Term(iTRAQ4plex); K14(iTRAQ4plex)       | 2 | 2 |
| [R].gPEVQLVAHSPWLk.[D]              | N-Term(iTRAQ4plex); K14(iTRAQ4plex)       | 2 | 2 |
| [R].gPEVQLVAHSPWLk.[D]              | N-Term(iTRAQ4plex); K14(iTRAQ4plex)       | 2 | 2 |
| [R].GPEVQLVAHSPWLk.[D]              | K14(iTRAQ4plex)                           | 2 | 2 |
| [K].eVYMPSSIFQDDFVIPDISEPGTWk.[I]   | N-Term(iTRAQ4plex); K25(iTRAQ4plex)       | 2 | 2 |
| [K].eVYMPSSIFQDDFVIPDISEPGTWk.[I]   | N-Term(iTRAQ4plex); K25(iTRAQ4plex)       | 2 | 2 |
| [R].gHLFLQTDQPIYNPGQR.[V]           | N-Term(iTRAQ4plex)                        | 2 | 2 |
| [K].sHALQLNNR.[Q]                   | N-Term(iTRAQ4plex)                        | 2 | 2 |
| [K].aDGSYAAWLSR.[DG]                | N-Term(iTRAQ4plex)                        | 2 | 2 |
| [R].vGDTLNLNLR.[A]                  | N-Term(iTRAQ4plex)                        | 2 | 2 |
| [R].vGDTLNLNLR.[A]                  | N-Term(iTRAQ4plex)                        | 2 | 2 |
| [R].ecVGFEAVQEVVGLVQPASATLYDYNNPE   | N-Term(iTRAQ4plex); C2(Carbamidomethyl)   | 2 | 2 |
| [R].ecVGFEAVQEVVGLVQPASATLYDYNNPE   | N-Term(iTRAQ4plex); C2(Carbamidomethyl)   | 2 | 2 |
| [K].aEMADQASAWLTR.[Q]               | N-Term(iTRAQ4plex)                        | 1 | 1 |
| [R].vTASDPLDTLGSEGalSPGGVASLLR.[L]  | N-Term(iTRAQ4plex)                        | 2 | 2 |
| [R].sTQDVTIAlDALSAyWIASHTTEER.[G]   | N-Term(iTRAQ4plex)                        | 2 | 2 |
| [R].STQDVTIAlDALSAyWIASHTTEER.[G]   |                                           | 2 | 2 |
| [K].eVYmPSSIFQDDFVIPDISEPGTWk.[I]   | N-Term(iTRAQ4plex); M4(Oxidation)         | 2 | 2 |
| [R].ILATLcSAEVcQcAEGk.[C]           | N-Term(iTRAQ4plex); C6(Carbamidomethyl)   | 2 | 2 |
| [R].VTASDPLDTLGSEGalSPGGVASLLR.[L]  |                                           | 2 | 2 |
| [R].vTASDPLDTLGSEGalSPGGVASLLR.[L]  | N-Term(iTRAQ4plex)                        | 2 | 2 |
| [R].LLATLcSAEVcQcAEGk.[C]           | C6(Carbamidomethyl); C11(Carbamidomethyl) | 2 | 2 |
| [R].kADGSYAAWLSR.[DG]               | N-Term(iTRAQ4plex); K1(iTRAQ4plex)        | 2 | 2 |
| [R].kADGSYAAWLSR.[DG]               | N-Term(iTRAQ4plex); K1(iTRAQ4plex)        | 2 | 2 |
| [K].scGLHQLLR.[G]                   | N-Term(iTRAQ4plex); C2(Carbamidomethyl)   | 2 | 2 |
| [R].vFALDQk.[M]                     | N-Term(iTRAQ4plex); K7(iTRAQ4plex)        | 2 | 2 |
| [R].kADGSYAAWLSR.[DG]               | N-Term(iTRAQ4plex); K1(iTRAQ4plex)        | 2 | 2 |
| [R].kADGSYAAWLSR.[DG]               | N-Term(iTRAQ4plex); K1(iTRAQ4plex)        | 2 | 2 |
| [R].kADGSYAAWLSR.[DG]               | N-Term(iTRAQ4plex); K1(iTRAQ4plex)        | 2 | 2 |
| [K].vVEEQESR.[V]                    | N-Term(iTRAQ4plex)                        | 2 | 2 |
| [K].vLSLAQEQVGGSPek.[L]             | N-Term(iTRAQ4plex); K15(iTRAQ4plex)       | 2 | 2 |
| [R].eAPkVVEEQESR.[V]                | N-Term(iTRAQ4plex); K4(iTRAQ4plex)        | 2 | 2 |
| [R].aAcAQLNDFLQEQGTQgCQV.[-]        | N-Term(iTRAQ4plex); C3(Carbamidomethyl)   | 2 | 2 |
| [R].aAcAQLNDFLQEQGTQgCQV.[-]        | N-Term(iTRAQ4plex); C3(Carbamidomethyl)   | 2 | 2 |
| [K].IQETSNWLLSQQQADGFSQDPcPVLDR.[S] | N-Term(iTRAQ4plex); C22(Carbamidomethyl)  | 1 | 1 |
| [K].IQETSNWLLSQQQADGFSQDPcPVLDR.[S] | N-Term(iTRAQ4plex); C22(Carbamidomethyl)  | 1 | 1 |
| [R].ILATLcSAEVcQcAEGk.[C]           | N-Term(iTRAQ4plex); C6(Carbamidomethyl)   | 2 | 2 |
| [R].ILATLcSAEVcQcAEGk.[C]           | N-Term(iTRAQ4plex); C6(Carbamidomethyl)   | 2 | 2 |
| [R].ILATLcSAEVcQcAEGk.[C]           | N-Term(iTRAQ4plex); C6(Carbamidomethyl)   | 2 | 2 |
| [R].ILATLcSAEVcQcAEGk.[C]           | N-Term(iTRAQ4plex); C6(Carbamidomethyl)   | 2 | 2 |
| [R].ePFLSccQFAESLR.[K]              | N-Term(iTRAQ4plex); C6(Carbamidomethyl)   | 2 | 2 |
| [R].ePFLSccQFAESLR.[K]              | N-Term(iTRAQ4plex); C6(Carbamidomethyl)   | 2 | 2 |
| [R].ePFLSccQFAESLR.[K]              | N-Term(iTRAQ4plex); C6(Carbamidomethyl)   | 2 | 2 |
| [R].avGSGATFSHYMMILSR.[G]           | N-Term(iTRAQ4plex)                        | 2 | 2 |
| [K].aEFQDALEk.[L]                   | N-Term(iTRAQ4plex); K9(iTRAQ4plex)        | 2 | 2 |
| [R].tTNIQGINLLFSSR.[R]              | N-Term(iTRAQ4plex)                        | 2 | 2 |
| [R].tTNIQGINLLFSSR.[R]              | N-Term(iTRAQ4plex)                        | 2 | 2 |

|                                   |                                         |   |   |
|-----------------------------------|-----------------------------------------|---|---|
| [K].tEQWSTLPPETk.[D]              | N-Term(iTRAQ4plex); K12(iTRAQ4plex)     | 2 | 2 |
| [K].tEQWSTLPPETk.[D]              | N-Term(iTRAQ4plex); K12(iTRAQ4plex)     | 2 | 2 |
| [K].tEQWSTLPPETk.[D]              | N-Term(iTRAQ4plex); K12(iTRAQ4plex)     | 2 | 2 |
| [K].tEQWSTLPPETk.[D]              | N-Term(iTRAQ4plex); K12(iTRAQ4plex)     | 2 | 2 |
| [R].TTNIQGINLLFSSR.[R]            |                                         | 2 | 2 |
| [K].tEQWSTLPPETk.[D]              | N-Term(iTRAQ4plex); K12(iTRAQ4plex)     | 2 | 2 |
| [K].tEQWSTLPPETk.[D]              | N-Term(iTRAQ4plex); K12(iTRAQ4plex)     | 2 | 2 |
| [K].TEQWSTLPPETk.[D]              | K12(iTRAQ4plex)                         | 2 | 2 |
| [K].tEQWSTLPPETk.[D]              | N-Term(iTRAQ4plex); K12(iTRAQ4plex)     | 2 | 2 |
| [K].tEQWSTLPPETk.[D]              | N-Term(iTRAQ4plex); K12(iTRAQ4plex)     | 2 | 2 |
| [R].dFALLSLQVPLk.[D]              | N-Term(iTRAQ4plex); K12(iTRAQ4plex)     | 2 | 2 |
| [R].aLEILQEEDLIDEDDIPVR.[S]       | N-Term(iTRAQ4plex)                      | 2 | 2 |
| [K].shKPLNMGk.[V]                 | N-Term(iTRAQ4plex); K3(iTRAQ4plex)      | 2 | 2 |
| [K].INMGITDLQGLR.[L]              | N-Term(iTRAQ4plex)                      | 2 | 2 |
| [K].INMGITDLQGLR.[L]              | N-Term(iTRAQ4plex)                      | 2 | 2 |
| [R].dSSTWLTAFVLk.[V]              | N-Term(iTRAQ4plex); K12(iTRAQ4plex)     | 1 | 1 |
| [R].EELVYELNPLDHR.[G]             |                                         | 2 | 2 |
| [K].vGLSGmAIADVTLSSGFHALR.[A]     | N-Term(iTRAQ4plex); M6(Oxidation)       | 2 | 2 |
| [R].rFEQLRPLVLYNYLdk.[N]          | N-Term(iTRAQ4plex); K17(iTRAQ4plex)     | 2 | 2 |
| [R].hLVPGAPFLQALVR.[E]            | N-Term(iTRAQ4plex)                      | 2 | 2 |
| [K].aSAGLLGAHAAAITAYALTLTk.[A]    | N-Term(iTRAQ4plex); K22(iTRAQ4plex)     | 2 | 2 |
| [K].aSAGLLGAHAAAITAYALTLTk.[A]    | N-Term(iTRAQ4plex); K22(iTRAQ4plex)     | 2 | 2 |
| [R].vDVQAGAcEGk.[L]               | N-Term(iTRAQ4plex); C8(Carbamidomethyl) | 2 | 2 |
| [R].vDVQAGAcEGk.[L]               | N-Term(iTRAQ4plex); C8(Carbamidomethyl) | 2 | 2 |
| [R].vDVQAGAcEGk.[L]               | N-Term(iTRAQ4plex); C8(Carbamidomethyl) | 2 | 2 |
| [K].iTPGkPYILTVPGHLDQMQLDIQAR.[Y] | N-Term(iTRAQ4plex); K5(iTRAQ4plex)      | 2 | 2 |
| [K].dHAVDLIQk.[G]                 | N-Term(iTRAQ4plex); K9(iTRAQ4plex)      | 2 | 2 |
| [R].tTNIQGINLLFSSR.[R]            | N-Term(iTRAQ4plex)                      | 2 | 2 |
| [K].dHAVDLIQk.[G]                 | N-Term(iTRAQ4plex); K9(iTRAQ4plex)      | 2 | 2 |
| [K].dHAVDLIQk.[G]                 | N-Term(iTRAQ4plex); K9(iTRAQ4plex)      | 2 | 2 |
| [K].iTPGkPYILTVPGHLDQMQLDIQAR.[Y] | N-Term(iTRAQ4plex); K5(iTRAQ4plex)      | 2 | 2 |
| [K].dHAVDLIQk.[G]                 | N-Term(iTRAQ4plex); K9(iTRAQ4plex)      | 2 | 2 |
| [K].dHAVDLIQk.[G]                 | N-Term(iTRAQ4plex); K9(iTRAQ4plex)      | 2 | 2 |
| [K].INMGITDLQGLR.[L]              | N-Term(iTRAQ4plex)                      | 2 | 2 |
| [R].fGLLEDGk.[K]                  | N-Term(iTRAQ4plex); K9(iTRAQ4plex)      | 2 | 2 |
| [R].VDVQAGAcEGk.[L]               | C8(Carbamidomethyl); K11(iTRAQ4plex)    | 2 | 2 |
| [K].VLSLAQEQVGGSPek.[L]           | K15(iTRAQ4plex)                         | 2 | 2 |
| [R].gLQDEDEGYR.[M]                | N-Term(iTRAQ4plex)                      | 2 | 2 |
| [R].gLQDEDEGYR.[M]                | N-Term(iTRAQ4plex)                      | 2 | 2 |
| [R].DFALLSLQVPLk.[D]              | K12(iTRAQ4plex)                         | 2 | 2 |
| [R].LTVAAPPSGGPGFLSIERPDSRPPR.[V] |                                         | 2 | 2 |
| [R].gLQDEDEGYR.[M]                | N-Term(iTRAQ4plex)                      | 2 | 2 |
| [R].gLQDEDEGYR.[M]                | N-Term(iTRAQ4plex)                      | 2 | 2 |
| [R].eMSGSPASGIPVk.[V]             | N-Term(iTRAQ4plex); K13(iTRAQ4plex)     | 2 | 2 |
| [R].fGLLEDGk.[T]                  | N-Term(iTRAQ4plex); K9(iTRAQ4plex)      | 2 | 2 |
| [R].fGLLEDGk.[T]                  | N-Term(iTRAQ4plex); K9(iTRAQ4plex)      | 2 | 2 |
| [R].fGLLEDGk.[K]                  | N-Term(iTRAQ4plex); K9(iTRAQ4plex)      | 2 | 2 |
| [R].gLQDEDEGYR.[M]                | N-Term(iTRAQ4plex)                      | 2 | 2 |
| [R].gLQDEDEGYR.[M]                | N-Term(iTRAQ4plex)                      | 2 | 2 |
| [R].gLQDEDEGYR.[M]                | N-Term(iTRAQ4plex)                      | 2 | 2 |
| [R].gLQDEDEGYR.[M]                | N-Term(iTRAQ4plex)                      | 2 | 2 |
| [R].tYNVLDmK.[N]                  | N-Term(iTRAQ4plex); K8(iTRAQ4plex)      | 2 | 2 |

|                                    |                                         |   |   |
|------------------------------------|-----------------------------------------|---|---|
| [K].LHLETDSLALVALGALDTALYAAGSk.[S] | K26(iTRAQ4plex)                         | 2 | 2 |
| [K].IHLETDSLALVALGALDTALYAAGSk.[S] | N-Term(iTRAQ4plex); K26(iTRAQ4plex)     | 2 | 2 |
| [R].ITVAAPPSGGPGFLSIERPDSRPPR.[V]  | N-Term(iTRAQ4plex)                      | 2 | 2 |
| [R].ITVAAPPSGGPGFLSIERPDSRPPR.[V]  | N-Term(iTRAQ4plex)                      | 2 | 2 |
| [R].ITVAAPPSGGPGFLSIERPDSRPPR.[V]  | N-Term(iTRAQ4plex)                      | 2 | 2 |
| [R].fQILTLWLPDSLTTWEIHGLSLSk.[T]   | N-Term(iTRAQ4plex); K24(iTRAQ4plex)     | 2 | 2 |
| [R].fQILTLWLPDSLTTWEIHGLSLSk.[T]   | N-Term(iTRAQ4plex); K24(iTRAQ4plex)     | 2 | 2 |
| [K].tEQWSTLPPETk.[D]               | N-Term(iTRAQ4plex); K12(iTRAQ4plex)     | 2 | 2 |
| [R].sMQGGLVGNDETVALTAFVTIALHHGLAV  | N-Term(iTRAQ4plex); K39(iTRAQ4plex)     | 2 | 2 |
| [K].tEQWSTLPPETk.[D]               | N-Term(iTRAQ4plex); K12(iTRAQ4plex)     | 2 | 2 |
| [K].tEQWSTLPPETk.[D]               | N-Term(iTRAQ4plex); K12(iTRAQ4plex)     | 2 | 2 |
| [K].tEQWSTLPPETk.[D]               | N-Term(iTRAQ4plex); K12(iTRAQ4plex)     | 2 | 2 |
| [R].sMQGGLVGNDETVALTAFVTIALHHGLAV  | N-Term(iTRAQ4plex); K39(iTRAQ4plex)     | 2 | 2 |
| [K].tEQWSTLPPETk.[D]               | N-Term(iTRAQ4plex); K12(iTRAQ4plex)     | 2 | 2 |
| [K].tEQWSTLPPETk.[D]               | N-Term(iTRAQ4plex); K12(iTRAQ4plex)     | 2 | 2 |
| [K].IELSVDGak.[Q]                  | N-Term(iTRAQ4plex); K9(iTRAQ4plex)      | 2 | 2 |
| [K].IGQYASPTak.[R]                 | N-Term(iTRAQ4plex); K10(iTRAQ4plex)     | 2 | 2 |
| [R].sTQDTVIALDALSAWIASHTTEER.[G]   | N-Term(iTRAQ4plex)                      | 2 | 2 |
| [K].vGLSGMAIADVTLISGFHALR.[A]      | N-Term(iTRAQ4plex)                      | 2 | 2 |
| [K].aNSFLGEk.[A]                   | N-Term(iTRAQ4plex); K8(iTRAQ4plex)      | 1 | 1 |
| [R].sFFPENWLWR.[V]                 | N-Term(iTRAQ4plex)                      | 2 | 2 |
| [R].sFFPENWLWR.[V]                 |                                         | 2 | 2 |
| [K].vGLSGMAIADVTLISGFHALR.[A]      | N-Term(iTRAQ4plex)                      | 2 | 2 |
| [R].FGLLEDGkk.[T]                  | K9(iTRAQ4plex); K10(iTRAQ4plex)         | 2 | 2 |
| [R].vTASDPLDTLGSEGALSPGGVASLLR.[L] | N-Term(iTRAQ4plex)                      | 2 | 2 |
| [R].ILLFSPSVVHLGVPLSVGVQLQDVPR.[G] | N-Term(iTRAQ4plex)                      | 2 | 2 |
| [R].ILLFSPSVVHLGVPLSVGVQLQDVPR.[G] | N-Term(iTRAQ4plex)                      | 2 | 2 |
| [R].hLVPGAPFLLQALVR.[E]            | N-Term(iTRAQ4plex)                      | 2 | 2 |
| [R].dkGQAGLQR.[A]                  | N-Term(iTRAQ4plex); K2(iTRAQ4plex)      | 2 | 2 |
| [K].sHALQLNNR.[Q]                  | N-Term(iTRAQ4plex)                      | 2 | 2 |
| [R].cSVFYGAPSk.[S]                 | N-Term(iTRAQ4plex); C1(Carbamidomethyl) | 2 | 2 |
| [K].sHkPLNmGk.[V]                  | N-Term(iTRAQ4plex); K3(iTRAQ4plex)      | 2 | 2 |
| [K].sHKPLNMGk.[V]                  | N-Term(iTRAQ4plex); K9(iTRAQ4plex)      | 2 | 2 |
| [K].tEQWSTLPPETk.[D]               | N-Term(iTRAQ4plex); K12(iTRAQ4plex)     | 2 | 2 |
| [R].gPEVQLVAHSPWLk.[D]             | N-Term(iTRAQ4plex); K14(iTRAQ4plex)     | 2 | 2 |
| [R].gLQDEDEGYR.[M]                 | N-Term(iTRAQ4plex)                      | 2 | 2 |
| [K].sHALQLNNR.[Q]                  | N-Term(iTRAQ4plex)                      | 2 | 2 |
| [K].aEMADQASAWLTR.[Q]              | N-Term(iTRAQ4plex)                      | 1 | 1 |
| [R].eELVYELNPLDHR.[G]              | N-Term(iTRAQ4plex)                      | 2 | 2 |
| [R].vEYGFQVk.[V]                   | N-Term(iTRAQ4plex); K8(iTRAQ4plex)      | 2 | 2 |
| [R].ITVAAPPSGGPGFLSIERPDSRPPR.[V]  | N-Term(iTRAQ4plex)                      | 2 | 2 |
| [R].gPEVQLVAHSPWLk.[D]             | N-Term(iTRAQ4plex); K14(iTRAQ4plex)     | 2 | 2 |
| [R].gLQDEDEGYR.[M]                 | N-Term(iTRAQ4plex)                      | 2 | 2 |
| [K].TEQWSTLPPETk.[D]               | K12(iTRAQ4plex)                         | 2 | 2 |
| [R].cSVFYGAPSk.[S]                 | N-Term(iTRAQ4plex); C1(Carbamidomethyl) | 2 | 2 |
| [K].IGQYASPTak.[R]                 | N-Term(iTRAQ4plex); K10(iTRAQ4plex)     | 2 | 2 |
| [K].aEFQDALEk.[L]                  | N-Term(iTRAQ4plex); K9(iTRAQ4plex)      | 2 | 2 |
| [K].TEQWSTLPPETk.[D]               | K12(iTRAQ4plex)                         | 2 | 2 |
| [K].scGLHQLLR.[G]                  | N-Term(iTRAQ4plex); C2(Carbamidomethyl) | 2 | 2 |
| [R].tLEIPGNSDPNMIPDGFNSYVR.[V]     | N-Term(iTRAQ4plex)                      | 2 | 2 |
| [R].tYNVLDmK.[N]                   | N-Term(iTRAQ4plex); K8(iTRAQ4plex)      | 2 | 2 |
| [K].tEQWSTLPPETk.[D]               | N-Term(iTRAQ4plex); K12(iTRAQ4plex)     | 2 | 2 |

|                                   |                                |   |   |
|-----------------------------------|--------------------------------|---|---|
| [K].tEQWSTLPPETk.[D]              | N-Term(iTRAQ4plex); K12(iTRAQ4 | 2 | 2 |
| [K].vLQIEkEGAIHR.[E]              | N-Term(iTRAQ4plex); K6(iTRAQ4  | 2 | 2 |
| [K].ScGLHQLLR.[G]                 | C2(Carbamidomethyl)            | 2 | 2 |
| [R].nNVPcSPk.[V]                  | N-Term(iTRAQ4plex); C5(Carbam  | 2 | 2 |
| [R].GHLFLQTDQPIYNPGQR.[V]         |                                | 2 | 2 |
| [R].tTNIQGINLLFSSR.[R]            | N-Term(iTRAQ4plex)             | 2 | 2 |
| [R].kADGSYAAWLSR.[DG]             | N-Term(iTRAQ4plex); K1(iTRAQ4  | 2 | 2 |
| [R].vHYTVciWR.[N]                 | N-Term(iTRAQ4plex); C6(Carbam  | 2 | 2 |
| [R].GHLFLQTDQPIYNPGQR.[V]         |                                | 2 | 2 |
| [K].vDFTLSSER.[D]                 | N-Term(iTRAQ4plex)             | 2 | 2 |
| [K].YVLPNFEVk.[I]                 | K9(iTRAQ4plex)                 | 2 | 2 |
| [R].RGHLFLQTDQPIYNPGQR.[V]        |                                | 2 | 2 |
| [R].gLQDEdGYR.[M]                 | N-Term(iTRAQ4plex)             | 2 | 2 |
| [K].kYVLPNFEVk.[I]                | N-Term(iTRAQ4plex); K1(iTRAQ4  | 2 | 2 |
| [K].scGLHQLLR.[G]                 | N-Term(iTRAQ4plex); C2(Carbam  | 2 | 2 |
| [K].sHALQLNNR.[Q]                 | N-Term(iTRAQ4plex)             | 2 | 2 |
| [R].kADGSYAAWLSR.[DG]             | N-Term(iTRAQ4plex); K1(iTRAQ4  | 2 | 2 |
| [K].yVLPNFEVk.[I]                 | N-Term(iTRAQ4plex); K9(iTRAQ4  | 2 | 2 |
| [K].tEQWSTLPPETk.[D]              | N-Term(iTRAQ4plex); K12(iTRAQ  | 2 | 2 |
| [K].LVNGQSHISLsk.[A]              | K12(iTRAQ4plex)                | 2 | 2 |
| [K].TEQWSTLPPETk.[D]              | K12(iTRAQ4plex)                | 2 | 2 |
| [K].dHAVDLIQkGYMR.[I]             | N-Term(iTRAQ4plex); K9(iTRAQ4  | 2 | 2 |
| [R].ITVAAPPSGGPGFLSIERPDSRPPR.[V] | N-Term(iTRAQ4plex)             | 2 | 2 |
| [K].vLSLAQEQVGGSPek.[L]           | N-Term(iTRAQ4plex); K15(iTRAQ  | 2 | 2 |
| [K].ITQVLHFTk.[D]                 | K9(iTRAQ4plex)                 | 2 | 2 |
| [K].LGQYASPTAk.[R]                | K10(iTRAQ4plex)                | 2 | 2 |
| [R].QGSFQGGFR.[S]                 |                                | 2 | 2 |
| [R].EELVYELNPLDHR.[G]             |                                | 2 | 2 |
| [R].RGHLFLQTDQPIYNPGQR.[V]        |                                | 2 | 2 |
| [R].EELVYELNPLDHR.[G]             |                                | 2 | 2 |
| [R].yRVFALDQk.[M]                 | N-Term(iTRAQ4plex); K9(iTRAQ4  | 2 | 2 |
| [K].yVLPNFEVk.[I]                 | N-Term(iTRAQ4plex); K9(iTRAQ4  | 2 | 2 |
| [R].yLDkTEQWSTLPPETk.[D]          | N-Term(iTRAQ4plex); K4(iTRAQ4  | 2 | 2 |
| [R].gSFEPVGDVAVsk.[V]             | N-Term(iTRAQ4plex); K13(iTRAQ  | 2 | 2 |
| [R].nNVPcSPk.[V]                  | N-Term(iTRAQ4plex); C5(Carbam  | 2 | 2 |
| [R].VHYTVciWR.[N]                 | C6(Carbamidomethyl)            | 2 | 2 |
| [R].vEASISk.[A]                   | N-Term(iTRAQ4plex); K7(iTRAQ4  | 2 | 2 |
| [R].nNVPcSPk.[V]                  | N-Term(iTRAQ4plex); C5(Carbam  | 2 | 2 |
| [R].vEASISk.[A]                   | N-Term(iTRAQ4plex); K7(iTRAQ4  | 2 | 2 |
| [R].tYNVLDmK.[N]                  | N-Term(iTRAQ4plex); K8(iTRAQ4  | 2 | 2 |
| [K].scGLHQLLR.[G]                 | N-Term(iTRAQ4plex); C2(Carbam  | 2 | 2 |
| [R].dkGQAGLQR.[A]                 | N-Term(iTRAQ4plex); K2(iTRAQ4  | 2 | 2 |
| [R].tLEIPGNSDPNMIPDGDfNSYVR.[V]   | N-Term(iTRAQ4plex)             | 2 | 2 |
| [R].tLEIPGNSDPNMIPDGDfNSYVR.[V]   | N-Term(iTRAQ4plex)             | 2 | 2 |
| [K].yVLPNFEVk.[I]                 | N-Term(iTRAQ4plex); K9(iTRAQ4  | 2 | 2 |
| [K].LNMGITDLQGLR.[L]              |                                | 2 | 2 |
| [K].IGQYASPTAk.[R]                | N-Term(iTRAQ4plex); K10(iTRAQ  | 2 | 2 |
| [R].vEASISk.[A]                   | K7(iTRAQ4plex)                 | 2 | 2 |
| [R].gLEELQFSLGsk.[I]              | N-Term(iTRAQ4plex); K13(iTRAQ  | 2 | 2 |
| [R].gLQDEdGYR.[M]                 | N-Term(iTRAQ4plex)             | 2 | 2 |
| [R].cSVFYGAPskSR.[L]              | C1(Carbamidomethyl); K10(iTRA  | 2 | 2 |
| [K].TEQWSTLPPETk.[D]              | K12(iTRAQ4plex)                | 2 | 2 |

|                                     |                                |   |   |
|-------------------------------------|--------------------------------|---|---|
| [R].yLDkTEQWSTLPPETk.[D]            | N-Term(iTRAQ4plex); K4(iTRAQ4  | 2 | 2 |
| [R].kADGSYAAWLSR.[DG]               | N-Term(iTRAQ4plex); K1(iTRAQ4  | 2 | 2 |
| [K].tkGLcVATPVQLR.[V]               | N-Term(iTRAQ4plex); K2(iTRAQ4  | 2 | 2 |
| [K].IELSVDGak.[Q]                   | N-Term(iTRAQ4plex); K9(iTRAQ4  | 2 | 2 |
| [R].ITVAAPPSGGPGFLSIERPDSRPPR.[V]   | N-Term(iTRAQ4plex)             | 2 | 2 |
| [K].VDFTLSSER.[D]                   |                                | 2 | 2 |
| [K].kYVLPNFEVk.[I]                  | K1(iTRAQ4plex); K10(iTRAQ4ple  | 2 | 2 |
| [K].kYVLPNFEVk.[I]                  | N-Term(iTRAQ4plex); K10(iTRAQ  | 2 | 2 |
| [K].kYVLPNFEVk.[I]                  | N-Term(iTRAQ4plex); K1(iTRAQ4  | 2 | 2 |
| [R].tYNVLDMk.[N]                    | N-Term(iTRAQ4plex); K8(iTRAQ4  | 2 | 2 |
| [R].fGLLEDGgk.[T]                   | N-Term(iTRAQ4plex); K9(iTRAQ4  | 2 | 2 |
| [R].eFHLHLR.[L]                     | N-Term(iTRAQ4plex)             | 2 | 2 |
| [R].RGHLFLQTDQPIYNPGQR.[V]          |                                | 2 | 2 |
| [R].GLQDEDGYR.[M]                   |                                | 2 | 2 |
| [K].vLSLAQEQVGGSpek.[L]             | N-Term(iTRAQ4plex); K15(iTRAQ  | 2 | 2 |
| [R].YIYGkPVQGVAYVR.[F]              | K5(iTRAQ4plex)                 | 2 | 2 |
| [R].vEASISk.[A]                     | N-Term(iTRAQ4plex); K7(iTRAQ4  | 2 | 2 |
| [R].vEYGFQVk.[V]                    | N-Term(iTRAQ4plex); K8(iTRAQ4  | 2 | 2 |
| [R].vFALDQk.[M]                     | N-Term(iTRAQ4plex); K7(iTRAQ4  | 2 | 2 |
| [R].VHYTVciWR.[N]                   | C6(Carbamidomethyl)            | 2 | 2 |
| [K].IQETSNWLLSQQQADGSFQDPcPVLDR.[S] | N-Term(iTRAQ4plex); C22(Carbar | 1 | 1 |
| [R].vFALDQk.[M]                     | N-Term(iTRAQ4plex); K7(iTRAQ4  | 2 | 2 |
| [R].nNVPcSPk.[V]                    | N-Term(iTRAQ4plex); C5(Carbam  | 2 | 2 |
| [R].dkGQAGLQR.[A]                   | N-Term(iTRAQ4plex); K2(iTRAQ4  | 2 | 2 |
| [K].shkPLNMGk.[V]                   | N-Term(iTRAQ4plex); K3(iTRAQ4  | 2 | 2 |
| [R].gLQDEDGYR.[M]                   | N-Term(iTRAQ4plex)             | 2 | 2 |
| [R].vEYGFQVk.[V]                    | N-Term(iTRAQ4plex); K8(iTRAQ4  | 2 | 2 |
| [R].cSVFYGAPSk.[S]                  | C1(Carbamidomethyl); K10(iTRA  | 2 | 2 |
| [K].vVEEQESR.[V]                    | N-Term(iTRAQ4plex)             | 2 | 2 |
| [K].GLcVATPVQLR.[V]                 | C3(Carbamidomethyl)            | 2 | 2 |
| [R].tLEIPGNSDPNmIPDGDfNSYVR.[V]     | N-Term(iTRAQ4plex); M12(Oxida  | 2 | 2 |
| [K].vLSLAQEQVGGSpek.[L]             | N-Term(iTRAQ4plex); K15(iTRAQ  | 2 | 2 |
| [R].eELVYELNPLDHR.[G]               | N-Term(iTRAQ4plex)             | 2 | 2 |
| [R].QGSFQGGFR.[S]                   |                                | 2 | 2 |
| [K].tEQWSTLPPETk.[D]                | N-Term(iTRAQ4plex); K12(iTRAQ  | 2 | 2 |
| [R].vEASISk.[A]                     | N-Term(iTRAQ4plex); K7(iTRAQ4  | 2 | 2 |
| [K].ADGSYAAWLSR.[DG]                |                                | 2 | 2 |
| [R].gLQDEDGYR.[M]                   | N-Term(iTRAQ4plex)             | 2 | 2 |
| [R].GLQDEDGYR.[M]                   |                                | 2 | 2 |
| [R].gQVvkGSVFLR.[N]                 | N-Term(iTRAQ4plex); K5(iTRAQ4  | 2 | 2 |
| [R].yLDkTEQWSTLPPETk.[D]            | N-Term(iTRAQ4plex); K4(iTRAQ4  | 2 | 2 |
| [R].dFALLSLQVPLkDAk.[S]             | N-Term(iTRAQ4plex); K12(iTRAQ  | 2 | 2 |
| [K].vVEEQESR.[V]                    | N-Term(iTRAQ4plex)             | 2 | 2 |
| [R].aAcAQLNDFLQEQGTQGCQV.[-]        | N-Term(iTRAQ4plex); C3(Carbam  | 2 | 2 |
| [K].vVEEQESR.[V]                    | N-Term(iTRAQ4plex)             | 2 | 2 |
| [R].eMSGSPASGIPVk.[V]               | N-Term(iTRAQ4plex); K13(iTRAQ  | 2 | 2 |
| [K].FAcYYPR.[V]                     | C3(Carbamidomethyl)            | 2 | 2 |
| [R].vFALDQk.[M]                     | N-Term(iTRAQ4plex); K7(iTRAQ4  | 2 | 2 |
| [K].vVEEQESR.[V]                    | N-Term(iTRAQ4plex)             | 2 | 2 |
| [R].QGSFQGGFR.[S]                   |                                | 2 | 2 |
| [K].vVEEQESR.[V]                    | N-Term(iTRAQ4plex)             | 2 | 2 |
| [K].iTQVLHFTk.[D]                   | N-Term(iTRAQ4plex); K9(iTRAQ4  | 2 | 2 |

|                                    |                               |   |   |
|------------------------------------|-------------------------------|---|---|
| [R].kADGSYAAWLSR.[DG]              | N-Term(iTRAQ4plex); K1(iTRAQ4 | 2 | 2 |
| [R].vFALDQk.[M]                    | N-Term(iTRAQ4plex); K7(iTRAQ4 | 2 | 2 |
| [K].qYRNGESVk.[L]                  | N-Term(iTRAQ4plex); K9(iTRAQ4 | 2 | 2 |
| [R].VFALDQk.[M]                    | K7(iTRAQ4plex)                | 2 | 2 |
| [R].gLESQtk.[L]                    | N-Term(iTRAQ4plex); K7(iTRAQ4 | 2 | 2 |
| [R].dkGQAGLQR.[A]                  | N-Term(iTRAQ4plex); K2(iTRAQ4 | 2 | 2 |
| [K].iTQVLHFTk.[D]                  | N-Term(iTRAQ4plex); K9(iTRAQ4 | 2 | 2 |
| [R].gQIVFmNR.[E]                   | N-Term(iTRAQ4plex); M6(Oxidat | 2 | 2 |
| [R].GQIVFMNR.[E]                   |                               | 2 | 2 |
| [K].sHALQLNNR.[Q]                  | N-Term(iTRAQ4plex)            | 2 | 2 |
| [R].GSFEFPVGDVAVSk.[V]             | K13(iTRAQ4plex)               | 2 | 2 |
| [R].VGDTLNLNLR.[A]                 |                               | 2 | 2 |
| [R].YIYGkPVQGVAVYR.[F]             | K5(iTRAQ4plex)                | 2 | 2 |
| [R].gLQDEEDGYR.[M]                 | N-Term(iTRAQ4plex)            | 2 | 2 |
| [R].dFALLSLQVPLk.[D]               | N-Term(iTRAQ4plex); K12(iTRAQ | 2 | 2 |
| [R].gPEVQLVAHSPWLk.[D]             | N-Term(iTRAQ4plex); K14(iTRAQ | 2 | 2 |
| [K].iTQVLHFTk.[D]                  | N-Term(iTRAQ4plex); K9(iTRAQ4 | 2 | 2 |
| [R].gLESQtk.[L]                    | N-Term(iTRAQ4plex); K7(iTRAQ4 | 2 | 2 |
| [K].aDGSYAAWLSR.[DG]               | N-Term(iTRAQ4plex)            | 2 | 2 |
| [R].yIYGkPVQGVAVYR.[F]             | N-Term(iTRAQ4plex); K5(iTRAQ4 | 2 | 2 |
| [K].LQETSNEWLLSQQQADGSFQDPcPVLDR.[ | C22(Carbamidomethyl)          | 1 | 1 |
| [K].vVEEQESR.[V]                   | N-Term(iTRAQ4plex)            | 2 | 2 |
| [K].vDFTLSSER.[D]                  | N-Term(iTRAQ4plex)            | 2 | 2 |
| [R].EELVYELNPLDHR.[G]              |                               | 2 | 2 |
| [K].lELSVDGak.[Q]                  | N-Term(iTRAQ4plex); K9(iTRAQ4 | 2 | 2 |
| [R].RGHLFLQTDQPIYNPGQR.[V]         |                               | 2 | 2 |
| [R].rFEQLELRPVLYNYLDk.[N]          | N-Term(iTRAQ4plex); K17(iTRAQ | 2 | 2 |
| [R].dkGQAGLQR.[A]                  | N-Term(iTRAQ4plex); K2(iTRAQ4 | 2 | 2 |
| [K].iTQVLHFTk.[D]                  | N-Term(iTRAQ4plex); K9(iTRAQ4 | 2 | 2 |
| [R].eFHLHLR.[L]                    | N-Term(iTRAQ4plex)            | 2 | 2 |
| [R].vEYGFQVk.[V]                   | N-Term(iTRAQ4plex); K8(iTRAQ4 | 2 | 2 |
| [R].gLEEEELQFSLGsk.[I]             | N-Term(iTRAQ4plex); K13(iTRAQ | 2 | 2 |
| [R].tLEIPGNSDPNMIPDGFNSYVR.[V]     | N-Term(iTRAQ4plex)            | 2 | 2 |
| [R].dkGQAGLQR.[A]                  | N-Term(iTRAQ4plex); K2(iTRAQ4 | 2 | 2 |
| [K].sHkPLNmGk.[V]                  | N-Term(iTRAQ4plex); K3(iTRAQ4 | 2 | 2 |
| [K].mRPSTDTITVMVENSHGLR.[V]        | N-Term(iTRAQ4plex); M1(Oxidat | 2 | 2 |
| [R].gLESQtk.[L]                    | N-Term(iTRAQ4plex); K7(iTRAQ4 | 2 | 2 |
| [K].TEQWSTLPPETk.[D]               | K12(iTRAQ4plex)               | 2 | 2 |
| [R].GPEVQLVAHSPWLk.[D]             | K14(iTRAQ4plex)               | 2 | 2 |
| [R].vEYGFQVk.[V]                   | N-Term(iTRAQ4plex); K8(iTRAQ4 | 2 | 2 |
| [K].ScGLHQLLR.[G]                  | C2(Carbamidomethyl)           | 2 | 2 |
| [R].gHLFLQTDQPIYNPGQR.[V]          | N-Term(iTRAQ4plex)            | 2 | 2 |
| [R].ePFLSccQFAESLR.[K]             | N-Term(iTRAQ4plex); C6(Carbam | 2 | 2 |
| [R].gQIVFmNR.[E]                   | N-Term(iTRAQ4plex); M6(Oxidat | 2 | 2 |
| [R].eFHLHLR.[L]                    | N-Term(iTRAQ4plex)            | 2 | 2 |
| [K].tEQWSTLPPETk.[D]               | N-Term(iTRAQ4plex); K12(iTRAQ | 2 | 2 |
| [K].vLQIEKEGAIHR.[E]               | N-Term(iTRAQ4plex); K6(iTRAQ4 | 2 | 2 |
| [R].eELVYELNPLDHR.[G]              | N-Term(iTRAQ4plex)            | 2 | 2 |
| [R].cSVFYGAPSk.[S]                 | C1(Carbamidomethyl); K10(iTRA | 2 | 2 |
| [K].LNMGITDLQGLR.[L]               |                               | 2 | 2 |
| [R].VDVQAGAcEGk.[L]                | C8(Carbamidomethyl); K11(iTRA | 2 | 2 |
| [K].tyLPAVDEK.[L]                  | N-Term(iTRAQ4plex); K9(iTRAQ4 | 1 | 1 |

|                                  |                               |   |   |
|----------------------------------|-------------------------------|---|---|
| [K].tYLPVDEK.[L]                 | N-Term(iTRAQ4plex); K9(iTRAQ4 | 1 | 1 |
| [K].tYLPVDEK.[L]                 | N-Term(iTRAQ4plex); K9(iTRAQ4 | 1 | 1 |
| [K].tAAQNLYEK.[T]                | N-Term(iTRAQ4plex); K9(iTRAQ4 | 1 | 1 |
| [K].tAAQNLYEK.[T]                | N-Term(iTRAQ4plex); K9(iTRAQ4 | 1 | 1 |
| [K].tAAQNLYEK.[T]                | N-Term(iTRAQ4plex); K9(iTRAQ4 | 1 | 1 |
| [K].TYLPVDEK.[L]                 | K9(iTRAQ4plex)                | 1 | 1 |
| [K].tYLPVDEK.[L]                 | N-Term(iTRAQ4plex); K9(iTRAQ4 | 1 | 1 |
| [K].ESLSSYWESAK.[T]              | K11(iTRAQ4plex)               | 1 | 1 |
| [K].eSLSSYWESAK.[T]              | N-Term(iTRAQ4plex); K11(iTRAQ | 1 | 1 |
| [K].sTAAMSTYTGIFTDQVLSVLk.[G]    | N-Term(iTRAQ4plex); K21(iTRAQ | 1 | 1 |
| [K].sTAAMSTYTGIFTDQVLSVLk.[G]    | N-Term(iTRAQ4plex); K21(iTRAQ | 1 | 1 |
| [K].eSLSSYWESAK.[T]              | N-Term(iTRAQ4plex); K11(iTRAQ | 1 | 1 |
| [K].eSLSSYWESAK.[T]              | N-Term(iTRAQ4plex); K11(iTRAQ | 1 | 1 |
| [K].eSLSSYWESAK.[T]              | N-Term(iTRAQ4plex); K11(iTRAQ | 1 | 1 |
| [K].tAAQNLYEK.[T]                | N-Term(iTRAQ4plex); K9(iTRAQ4 | 1 | 1 |
| [K].tYLPVDEK.[L]                 | N-Term(iTRAQ4plex); K9(iTRAQ4 | 1 | 1 |
| [K].tYLPVDEK.[L]                 | N-Term(iTRAQ4plex); K9(iTRAQ4 | 1 | 1 |
| [K].TAAQNLYEK.[T]                | K9(iTRAQ4plex)                | 1 | 1 |
| [K].eSLSSYWESAK.[T]              | N-Term(iTRAQ4plex); K11(iTRAQ | 1 | 1 |
| [K].TAAQNLYEK.[T]                | K9(iTRAQ4plex)                | 1 | 1 |
| [K].tYLPVDEK.[L]                 | N-Term(iTRAQ4plex); K9(iTRAQ4 | 1 | 1 |
| [K].sTAAMSTYTGIFTDQVLSVLk.[G]    | N-Term(iTRAQ4plex); K21(iTRAQ | 1 | 1 |
| [K].KGHIYQGSEADSVFSGFLIFPSA.[-]  | N-Term(iTRAQ4plex); K1(iTRAQ4 | 1 | 1 |
| [K].KGHIYQGSEADSVFSGFLIFPSA.[-]  | N-Term(iTRAQ4plex); K1(iTRAQ4 | 1 | 1 |
| [K].gHIYQGSEADSVFSGFLIFPSA.[-]   | N-Term(iTRAQ4plex)            | 1 | 1 |
| [K].gLFQVVSgGMVLQLQQGDQVWVEK.[D] | N-Term(iTRAQ4plex); K24(iTRAQ | 1 | 1 |
| [R].sLGFcDTTNk.[G]               | N-Term(iTRAQ4plex); C5(Carbam | 1 | 1 |
| [K].eALQGVGDMGR.[A]              | N-Term(iTRAQ4plex)            | 1 | 1 |
| [R].gPGGVWAAK.[L]                | N-Term(iTRAQ4plex); K9(iTRAQ4 | 1 | 1 |
| [K].eALQGVGDmGR.[A]              | N-Term(iTRAQ4plex); M9(Oxidat | 1 | 1 |
| [K].EALQGVGDMGR.[A]              |                               | 1 | 1 |
| [K].eALQGVGDMGR.[A]              | N-Term(iTRAQ4plex)            | 1 | 1 |
| [K].eALQGVGDmGR.[A]              | N-Term(iTRAQ4plex); M9(Oxidat | 1 | 1 |
| [K].eALQGVGDMGR.[A]              | N-Term(iTRAQ4plex)            | 1 | 1 |
| [R].frPDGLPk.[K]                 | N-Term(iTRAQ4plex); K8(iTRAQ4 | 1 | 1 |
| [R].frPDGLPk.[K]                 | N-Term(iTRAQ4plex); K8(iTRAQ4 | 1 | 1 |
| [R].gPGGVWAAK.[L]                | N-Term(iTRAQ4plex); K9(iTRAQ4 | 1 | 1 |
| [R].gNYDAAQR.[G]                 | N-Term(iTRAQ4plex)            | 1 | 1 |
| [R].frPDGLPk.[K]                 | N-Term(iTRAQ4plex); K8(iTRAQ4 | 1 | 1 |
| [R].frPDGLPk.[K]                 | N-Term(iTRAQ4plex); K8(iTRAQ4 | 1 | 1 |
| [R].gPGGVWAAK.[L]                | N-Term(iTRAQ4plex); K9(iTRAQ4 | 1 | 1 |
| [R].gPGGVWAAK.[L]                | N-Term(iTRAQ4plex); K9(iTRAQ4 | 1 | 1 |
| [K].IEQGENVFLQATDk.[N]           | N-Term(iTRAQ4plex); K14(iTRAQ | 1 | 1 |
| [K].IEQGENVFLQATDk.[N]           | N-Term(iTRAQ4plex); K14(iTRAQ | 1 | 1 |
| [R].gNLcVNLMR.[G]                | N-Term(iTRAQ4plex); C4(Carbam | 1 | 1 |
| [R].fdHVITNMNNNYEPR.[S]          | N-Term(iTRAQ4plex)            | 1 | 1 |
| [K].vPGLYFTYHASSR.[G]            | N-Term(iTRAQ4plex)            | 1 | 1 |
| [R].gNLcVNLMR.[G]                | C4(Carbamidomethyl)           | 1 | 1 |
| [R].gNLcVNLMR.[G]                | N-Term(iTRAQ4plex); C4(Carbam | 1 | 1 |
| [K].vVGIPGcQTcR.[Y]              | N-Term(iTRAQ4plex); C7(Carbam | 1 | 1 |
| [R].gNLVSIHNFNINR.[I]            | N-Term(iTRAQ4plex)            | 1 | 1 |
| [R].gGHcVALcTR.[G]               | N-Term(iTRAQ4plex); C4(Carbam | 1 | 1 |

|                                     |                                |   |   |
|-------------------------------------|--------------------------------|---|---|
| [R].iQcSVSALNQGQVWIGGR.[I]          | N-Term(iTRAQ4plex); C3(Carbam  | 1 | 1 |
| [R].iQcSVSALNQGQVWIGGR.[I]          | N-Term(iTRAQ4plex); C3(Carbam  | 1 | 1 |
| [R].GGHcVALcTR.[G]                  | C4(Carbamidomethyl); C8(Carba  | 1 | 1 |
| [K].vVGIPGcQTcR.[Y]                 | N-Term(iTRAQ4plex); C7(Carbam  | 1 | 1 |
| [R].GGHcVALcTR.[G]                  | C4(Carbamidomethyl); C8(Carba  | 1 | 1 |
| [R].tYIYDHGFYPTDPVGVLYEDGDDTVATR.[S | N-Term(iTRAQ4plex)             | 1 | 1 |
| [R].sTELCGLWQGR.[Q]                 | N-Term(iTRAQ4plex); C5(Carbam  | 1 | 1 |
| [K].tYSVEYLDSSk.[L]                 | N-Term(iTRAQ4plex); K11(iTRAQ  | 1 | 1 |
| [R].tYIYDHGFYPTDPVGVLYEDGDDTVATR.[S | N-Term(iTRAQ4plex)             | 1 | 1 |
| [R].sSGLVSNAPGVQIR.[V]              | N-Term(iTRAQ4plex)             | 1 | 1 |
| [K].tYSVEYLDSSk.[L]                 | N-Term(iTRAQ4plex); K11(iTRAQ  | 1 | 1 |
| [K].tYSVEYLDSSk.[L]                 | N-Term(iTRAQ4plex); K11(iTRAQ  | 1 | 1 |
| [R].sSGLVSNAPGVQIR.[V]              | N-Term(iTRAQ4plex)             | 1 | 1 |
| [R].aLPGEQQLHALTR.[G]               | N-Term(iTRAQ4plex)             | 1 | 1 |
| [K].aQETSgeeisk.[F]                 | N-Term(iTRAQ4plex); K11(iTRAQ  | 1 | 1 |
| [K].aQETSgeeisk.[F]                 | N-Term(iTRAQ4plex); K11(iTRAQ  | 1 | 1 |
| [K].aQETSgeeisk.[F]                 | N-Term(iTRAQ4plex); K11(iTRAQ  | 1 | 1 |
| [K].AQETSgeeisk.[F]                 |                                | 1 | 1 |
| [K].aQETSgeeisk.[F]                 | N-Term(iTRAQ4plex); K11(iTRAQ  | 1 | 1 |
| [K].aLHVtNik.[K]                    | N-Term(iTRAQ4plex); K8(iTRAQ4  | 1 | 1 |
| [R].ALPGEQQLHALTR.[G]               |                                | 1 | 1 |
| [K].aQETSgeeisk.[F]                 | N-Term(iTRAQ4plex); K11(iTRAQ  | 1 | 1 |
| [R].vVESLak.[A]                     | N-Term(iTRAQ4plex); K7(iTRAQ4  | 1 | 1 |
| [R].aLPGEQQLHALTR.[G]               | N-Term(iTRAQ4plex)             | 1 | 1 |
| [K].dIDecDIVPDack.[G]               | N-Term(iTRAQ4plex); C5(Carbam  | 1 | 1 |
| [R].tcQDINEcETTNEcR.[E]             | N-Term(iTRAQ4plex); C2(Carbam  | 1 | 1 |
| [R].INcEDIDecR.[T]                  | N-Term(iTRAQ4plex); C3(Carbam  | 1 | 1 |
| [R].eLPQSIVYk.[Y]                   | N-Term(iTRAQ4plex); K9(iTRAQ4  | 1 | 1 |
| [R].eLPQSIVYk.[Y]                   | N-Term(iTRAQ4plex); K9(iTRAQ4  | 1 | 1 |
| [R].tcQDINEcETTNEcR.[E]             | N-Term(iTRAQ4plex); C2(Carbam  | 1 | 1 |
| [K].dIDecDIVPDack.[G]               | N-Term(iTRAQ4plex); C5(Carbam  | 1 | 1 |
| [R].eLPQSIVYk.[Y]                   | N-Term(iTRAQ4plex); K9(iTRAQ4  | 1 | 1 |
| [R].gFMQTYDDHLR.[D]                 | N-Term(iTRAQ4plex)             | 1 | 1 |
| [R].gFMQTYDDHLR.[D]                 | N-Term(iTRAQ4plex)             | 1 | 1 |
| [K].eLLETvVNR.[T]                   | N-Term(iTRAQ4plex)             | 1 | 1 |
| [K].aWFLEsk.[D]                     | N-Term(iTRAQ4plex); K7(iTRAQ4  | 1 | 1 |
| [K].aWFLEsk.[D]                     | N-Term(iTRAQ4plex); K7(iTRAQ4  | 1 | 1 |
| [K].aWFLEsk.[D]                     | N-Term(iTRAQ4plex); K7(iTRAQ4  | 1 | 1 |
| [R].dLGPLTk.[A]                     | N-Term(iTRAQ4plex); K7(iTRAQ4  | 1 | 1 |
| [K].AWFLEsk.[D]                     | K7(iTRAQ4plex)                 | 1 | 1 |
| [K].aWFLEsk.[D]                     | N-Term(iTRAQ4plex); K7(iTRAQ4  | 1 | 1 |
| [K].mVETALTPDacYPD.[-]              | N-Term(iTRAQ4plex); C11(Carbar | 1 | 1 |
| [R].sSEDPNEDIVER.[N]                | N-Term(iTRAQ4plex)             | 1 | 1 |
| [R].fVYHLSDLck.[K]                  | N-Term(iTRAQ4plex); C9(Carbam  | 1 | 1 |
| [R].sSEDPNEDIVER.[N]                | N-Term(iTRAQ4plex)             | 1 | 1 |
| [R].iVLVDNk.[C]                     | N-Term(iTRAQ4plex); K7(iTRAQ4  | 1 | 1 |
| [R].sSEDPNEDIVER.[N]                | N-Term(iTRAQ4plex)             | 1 | 1 |
| [R].fLEQQNQVLQTK.[W]                | N-Term(iTRAQ4plex); K12(iTRAQ  | 2 | 3 |
| [R].tAAENDFVTLk.[K]                 | N-Term(iTRAQ4plex); K11(iTRAQ  | 1 | 1 |
| [R].HGGGGGGFGGGGGFgsR.[S]           |                                | 1 | 1 |
| [K].gGSISGGGYGSggGk.[H]             | N-Term(iTRAQ4plex); K15(iTRAQ  | 1 | 1 |
| [R].sLVGLGGTk.[S]                   | N-Term(iTRAQ4plex); K9(iTRAQ4  | 1 | 1 |



|                              |                                         |   |    |
|------------------------------|-----------------------------------------|---|----|
| [R].FLEQQNQVLQtk.[W]         | K12(iTRAQ4plex)                         | 2 | 3  |
| [R].eVTVPVFYPTek.[V]         | N-Term(iTRAQ4plex); K12(iTRAQ4plex)     | 1 | 1  |
| [R].gATLALTQVTPQDER.[I]      | N-Term(iTRAQ4plex)                      | 1 | 1  |
| [R].gPVLQLHDLk.[R]           | N-Term(iTRAQ4plex); K10(iTRAQ4plex)     | 1 | 1  |
| [R].eETGQVLER.[G]            | N-Term(iTRAQ4plex)                      | 1 | 1  |
| [R].gATLALTQVTPQDER.[I]      | N-Term(iTRAQ4plex)                      | 1 | 1  |
| [K].nTcNHDEDTWVEcEDPFDLR.[L] | N-Term(iTRAQ4plex); C3(Carbamidomethyl) | 1 | 1  |
| [R].IADGPGHck.[G]            | N-Term(iTRAQ4plex); C8(Carbamidomethyl) | 1 | 1  |
| [K].eDQVvck.[Q]              | N-Term(iTRAQ4plex); C6(Carbamidomethyl) | 1 | 1  |
| [R].eATLQDcPSGPWgk.[N]       | N-Term(iTRAQ4plex); C7(Carbamidomethyl) | 1 | 1  |
| [R].keGGLGPLNIPLLADVTR.[R]   | N-Term(iTRAQ4plex); K1(iTRAQ4plex)      | 1 | 1  |
| [R].qITVNDLPVGR.[S]          | N-Term(iTRAQ4plex)                      | 1 | 2  |
| [R].qITVNDLPVGR.[S]          | N-Term(iTRAQ4plex)                      | 1 | 2  |
| [R].gLFIIDGk.[G]             | N-Term(iTRAQ4plex); K8(iTRAQ4plex)      | 1 | 1  |
| [R].iGkPAPDFk.[A]            | N-Term(iTRAQ4plex); K3(iTRAQ4plex)      | 1 | 1  |
| [K].yEVQGEVFTkPQLWP.[-]      | N-Term(iTRAQ4plex); K10(iTRAQ4plex)     | 1 | 1  |
| [K].rQDNEILIFWsk.[D]         | N-Term(iTRAQ4plex); K12(iTRAQ4plex)     | 1 | 1  |
| [R].gYSIFSyatK.[R]           | N-Term(iTRAQ4plex); K10(iTRAQ4plex)     | 1 | 1  |
| [K].aPLTkPLk.[A]             | N-Term(iTRAQ4plex); K5(iTRAQ4plex)      | 1 | 1  |
| [R].gYSIFSyatK.[R]           | N-Term(iTRAQ4plex); K10(iTRAQ4plex)     | 1 | 1  |
| [K].vGLSDAFVVVHR.[I]         | N-Term(iTRAQ4plex)                      | 1 | 1  |
| [R].qDWVDSGcPEESk.[E]        | N-Term(iTRAQ4plex); C8(Carbamidomethyl) | 1 | 1  |
| [R].aSVGQDSPEPR.[S]          | N-Term(iTRAQ4plex)                      | 1 | 1  |
| [K].iHGILSNTHR.[Q]           | N-Term(iTRAQ4plex)                      | 1 | 1  |
| [R].aSVGQDSPEPR.[S]          | N-Term(iTRAQ4plex)                      | 1 | 1  |
| [R].vYALPEDLVEVNPk.[M]       | N-Term(iTRAQ4plex); K14(iTRAQ4plex)     | 1 | 1  |
| [R].nEALIALLR.[E]            | N-Term(iTRAQ4plex)                      | 1 | 1  |
| [K].aYYHLLEQVAPk.[G]         | N-Term(iTRAQ4plex); K12(iTRAQ4plex)     | 1 | 1  |
| [R].eGESLEDLMk.[L]           | N-Term(iTRAQ4plex); K10(iTRAQ4plex)     | 1 | 1  |
| [K].eITALAPSTMk.[I]          | N-Term(iTRAQ4plex); K11(iTRAQ4plex)     | 1 | 6  |
| [R].hQGVMVGMGQk.[D]          | N-Term(iTRAQ4plex); K11(iTRAQ4plex)     | 1 | 7  |
| [KR].sYELPDGQVITIGNER.[F]    | N-Term(iTRAQ4plex)                      | 1 | 10 |
| [K].IWHHTFYNELR.[V]          |                                         | 1 | 9  |
| [K].eITALAPSTMk.[I]          | N-Term(iTRAQ4plex); K11(iTRAQ4plex)     | 1 | 6  |
| [R].hQGVMVGMGQk.[D]          | N-Term(iTRAQ4plex); K11(iTRAQ4plex)     | 1 | 7  |
| [KR].sYELPDGQVITIGNER.[F]    | N-Term(iTRAQ4plex)                      | 1 | 10 |
| [K].IWHHTFYNELR.[V]          |                                         | 1 | 9  |
| [K].vLATLcGQESTDTER.[A]      | N-Term(iTRAQ4plex); C6(Carbamidomethyl) | 1 | 1  |
| [R].IASPGFPGEYANDQER.[R]     | N-Term(iTRAQ4plex)                      | 1 | 1  |
| [R].rWTLTAPPGYR.[L]          | N-Term(iTRAQ4plex)                      | 1 | 1  |
| [K].wPEPVFGR.[L]             | N-Term(iTRAQ4plex)                      | 1 | 1  |
| [K].iTGFLkPGk.[V]            | N-Term(iTRAQ4plex); K6(iTRAQ4plex)      | 1 | 1  |
| [R].iTLPDFTGDLR.[I]          | N-Term(iTRAQ4plex)                      | 1 | 1  |
| [K].sFRPFVPR.[L]             | N-Term(iTRAQ4plex)                      | 1 | 1  |
| [R].vQLYDLGLQIHk.[D]         | N-Term(iTRAQ4plex); K12(iTRAQ4plex)     | 1 | 1  |
| [R].eNSLLFDPLSSSSNk.[E]      | N-Term(iTRAQ4plex); K16(iTRAQ4plex)     | 1 | 1  |
| [R].kiQTQLQR.[D]             | N-Term(iTRAQ4plex); K1(iTRAQ4plex)      | 1 | 1  |
| [R].kVVATTQMQAADAR.[K]       | K1(iTRAQ4plex)                          | 1 | 1  |
| [R].kVVATTQMQAADAR.[K]       | N-Term(iTRAQ4plex)                      | 1 | 1  |
| [K].iQTQLQR.[D]              | N-Term(iTRAQ4plex)                      | 1 | 1  |
| [K].dcVGDVTENQlcNk.[Q]       | N-Term(iTRAQ4plex); C2(Carbamidomethyl) | 1 | 1  |
| [R].tIVTTLQDSIR.[K]          | N-Term(iTRAQ4plex)                      | 1 | 1  |

|                         |                                |   |   |
|-------------------------|--------------------------------|---|---|
| [R].tcHIQEcDk.[R]       | N-Term(iTRAQ4plex); C2(Carbam  | 1 | 1 |
| [R].lcNNPTPQFGGk.[D]    | N-Term(iTRAQ4plex); C2(Carbam  | 1 | 1 |
| [K].nWGLSVYADkPETTk.[E] | N-Term(iTRAQ4plex); K10(iTRAQ  | 1 | 1 |
| [K].nWGLSVYADkPETTk.[E] | N-Term(iTRAQ4plex); K10(iTRAQ  | 1 | 1 |
| [K].nWGLSVYADkPETTk.[E] | N-Term(iTRAQ4plex); K10(iTRAQ  | 1 | 1 |
| [K].nWGLSVYADkPETTk.[E] | N-Term(iTRAQ4plex); K10(iTRAQ  | 1 | 1 |
| [K].nWGLSVYADkPETTk.[E] | N-Term(iTRAQ4plex); K10(iTRAQ  | 1 | 1 |
| [K].eQLGEFYEALDcLR.[I]  | N-Term(iTRAQ4plex); C12(Carbar | 1 | 1 |
| [K].eQLGEFYEALDcLR.[I]  | N-Term(iTRAQ4plex); C12(Carbar | 1 | 1 |
| [K].eQLGEFYEALDcLR.[I]  | N-Term(iTRAQ4plex); C12(Carbar | 1 | 1 |
| [K].EQLGEFYEALDcLR.[I]  | C12(Carbamidomethyl)           | 1 | 1 |
| [K].tYmLAFDVNDEk.[N]    | N-Term(iTRAQ4plex); M3(Oxidati | 1 | 1 |
| [K].tYMLAFDVNDEk.[N]    | N-Term(iTRAQ4plex); K12(iTRAQ  | 1 | 1 |
| [K].tYMLAFDVNDEk.[N]    | N-Term(iTRAQ4plex); K12(iTRAQ  | 1 | 1 |
| [K].tYMLAFDVNDEk.[N]    | N-Term(iTRAQ4plex); K12(iTRAQ  | 1 | 1 |
| [R].yVGGQEhFAHLLILR.[D] | N-Term(iTRAQ4plex)             | 1 | 1 |
| [K].eQLGEFYEALDcLR.[I]  | N-Term(iTRAQ4plex); C12(Carbar | 1 | 1 |
| [K].TEDTIFLR.[E]        |                                | 2 | 2 |
| [K].wFYIASAFR.[N]       | N-Term(iTRAQ4plex)             | 2 | 2 |
| [K].sDVVYTDWk.[K]       | N-Term(iTRAQ4plex); K9(iTRAQ4  | 1 | 1 |
| [R].yVGGQEhFAHLLILR.[D] | N-Term(iTRAQ4plex)             | 1 | 1 |
| [R].yVGGQEhFAHLLILR.[D] | N-Term(iTRAQ4plex)             | 1 | 1 |
| [R].yVGGQEhFAHLLILR.[D] | N-Term(iTRAQ4plex)             | 1 | 1 |
| [R].yVGGQEhFAHLLILR.[D] | N-Term(iTRAQ4plex)             | 1 | 1 |
| [K].dkcEPLEk.[Q]        | N-Term(iTRAQ4plex); K2(iTRAQ4  | 2 | 2 |
| [K].TEDTIFLR.[E]        |                                | 2 | 2 |
| [K].dkcEPLEk.[Q]        | N-Term(iTRAQ4plex); K2(iTRAQ4  | 2 | 2 |
| [K].dkcEPLEk.[Q]        | N-Term(iTRAQ4plex); K2(iTRAQ4  | 2 | 2 |
| [K].eQLGEFYEALDcLR.[I]  | N-Term(iTRAQ4plex); C12(Carbar | 1 | 1 |
| [K].dkcEPLEk.[Q]        | N-Term(iTRAQ4plex); K2(iTRAQ4  | 2 | 2 |
| [K].dkcEPLEk.[Q]        | N-Term(iTRAQ4plex); K2(iTRAQ4  | 2 | 2 |
| [K].SDVVYTDWk.[K]       | K9(iTRAQ4plex)                 | 1 | 1 |
| [K].wFYIASAFR.[N]       | N-Term(iTRAQ4plex)             | 2 | 2 |
| [K].NWGLSVYADkPETTk.[E] | K10(iTRAQ4plex); K15(iTRAQ4pl  | 1 | 1 |
| [K].dkcEPLEk.[Q]        | N-Term(iTRAQ4plex); K2(iTRAQ4  | 2 | 2 |
| [K].sDVVYTDWk.[K]       | N-Term(iTRAQ4plex); K9(iTRAQ4  | 1 | 1 |
| [K].NWGLSVYADkPETTk.[E] | K10(iTRAQ4plex); K15(iTRAQ4pl  | 1 | 1 |
| [K].NWGLSVYADkPETTk.[E] | K10(iTRAQ4plex); K15(iTRAQ4pl  | 1 | 1 |
| [K].DkcEPLEk.[Q]        | K2(iTRAQ4plex); C3(Carbamidon  | 2 | 2 |
| [K].sDVVYTDWk.[K]       | N-Term(iTRAQ4plex); K9(iTRAQ4  | 1 | 1 |
| [K].wFYIASAFR.[N]       |                                | 2 | 2 |
| [R].YVGGQEhFAHLLILR.[D] |                                | 1 | 1 |
| [K].SDVVYTDWk.[K]       | K9(iTRAQ4plex)                 | 1 | 1 |
| [R].yVGGQEhFAHLLILR.[D] | N-Term(iTRAQ4plex)             | 1 | 1 |
| [K].dKcEPLEk.[Q]        | N-Term(iTRAQ4plex); C3(Carbam  | 2 | 2 |
| [K].eQLGEFYEALDcLR.[I]  | N-Term(iTRAQ4plex); C12(Carbar | 1 | 1 |
| [K].NWGLSVYADkPETTk.[E] | K10(iTRAQ4plex); K15(iTRAQ4pl  | 1 | 1 |
| [R].yVGGQEhFAHLLILR.[D] | N-Term(iTRAQ4plex)             | 1 | 1 |
| [KR].sTSGGTAALGcLVk.[D] | N-Term(iTRAQ4plex); C11(Carbar | 2 | 2 |
| [KR].sTSGGTAALGcLVk.[D] | N-Term(iTRAQ4plex); C11(Carbar | 2 | 2 |
| [K].gPSVFPLAPSSk.[S]    | N-Term(iTRAQ4plex); K12(iTRAQ  | 1 | 1 |
| [K].gPSVFPLAPSSk.[S]    | N-Term(iTRAQ4plex); K12(iTRAQ  | 1 | 1 |

|                                    |                                          |   |   |
|------------------------------------|------------------------------------------|---|---|
| [K].gPSVFPLAPSSk.[S]               | N-Term(iTRAQ4plex); K12(iTRAQ4plex)      | 1 | 1 |
| [K].fnWYVDGVEVHNAk.[T]             | N-Term(iTRAQ4plex); K14(iTRAQ4plex)      | 1 | 1 |
| [K].fnWYVDGVEVHNAk.[T]             | N-Term(iTRAQ4plex); K14(iTRAQ4plex)      | 1 | 1 |
| [K].nQVSLTcLVk.[G]                 | N-Term(iTRAQ4plex); C7(Carbamidomethyl)  | 4 | 4 |
| [K].nQVSLTcLVk.[G]                 | N-Term(iTRAQ4plex); C7(Carbamidomethyl)  | 4 | 4 |
| [K].tTPPVLDSDGSFFLYSk.[L]          | N-Term(iTRAQ4plex); K17(iTRAQ4plex)      | 1 | 1 |
| [K].tHTcPPcPAPELLGGPSVFLFPPkPk.[D] | N-Term(iTRAQ4plex); C4(Carbamidomethyl)  | 1 | 1 |
| [K].tHTcPPcPAPELLGGPSVFLFPPkPk.[D] | N-Term(iTRAQ4plex); C4(Carbamidomethyl)  | 1 | 1 |
| [K].tHTcPPcPAPELLGGPSVFLFPPkPk.[D] | N-Term(iTRAQ4plex); C4(Carbamidomethyl)  | 1 | 1 |
| [R].tPEVtCvVVDVSHEDPEVk.[F]        | N-Term(iTRAQ4plex); C6(Carbamidomethyl)  | 1 | 1 |
| [R].tPEVtCvVVDVSHEDPEVk.[F]        | N-Term(iTRAQ4plex); C6(Carbamidomethyl)  | 1 | 1 |
| [K].aLPAPIEk.[T]                   | N-Term(iTRAQ4plex); K8(iTRAQ4plex)       | 2 | 2 |
| [R].ePQVYTLPPSR.[DE]               | N-Term(iTRAQ4plex)                       | 3 | 3 |
| [R].ePQVYTLPPSR.[DE]               | N-Term(iTRAQ4plex)                       | 3 | 3 |
| [R].ePQVYTLPPSR.[DE]               | N-Term(iTRAQ4plex)                       | 3 | 3 |
| [R].ePQVYTLPPSR.[DE]               | N-Term(iTRAQ4plex)                       | 3 | 3 |
| [R].ePQVYTLPPSR.[DE]               | N-Term(iTRAQ4plex)                       | 3 | 3 |
| [K].THTcPPcPAPELLGGPSVFLFPPkPk.[D] | C4(Carbamidomethyl); C7(Carbamidomethyl) | 1 | 1 |
| [R].ePQVYTLPPSR.[DE]               | N-Term(iTRAQ4plex)                       | 3 | 3 |
| [R].ePQVYTLPPSR.[DE]               | N-Term(iTRAQ4plex)                       | 3 | 3 |
| [KR].sTSGGTAALGcLVk.[D]            | N-Term(iTRAQ4plex); C11(Carbamidomethyl) | 2 | 2 |
| [K].tTPPVLDSDGSFFLYSk.[L]          | N-Term(iTRAQ4plex); K17(iTRAQ4plex)      | 1 | 1 |
| [K].aLPAPIEk.[T]                   | N-Term(iTRAQ4plex); K8(iTRAQ4plex)       | 2 | 2 |
| [K].GPSVFPLAPSSk.[S]               | K12(iTRAQ4plex)                          | 1 | 1 |
| [K].tTPPVLDSDGSFFLYSk.[L]          | N-Term(iTRAQ4plex); K17(iTRAQ4plex)      | 1 | 1 |
| [K].tTPPVLDSDGSFFLYSk.[L]          | N-Term(iTRAQ4plex); K17(iTRAQ4plex)      | 1 | 1 |
| [K].tTPPVLDSDGSFFLYSk.[L]          | K17(iTRAQ4plex)                          | 1 | 1 |
| [K].fnWYVDGVEVHNAk.[T]             | N-Term(iTRAQ4plex); K14(iTRAQ4plex)      | 1 | 1 |
| [K].DTLmISR.[T]                    | M4(Oxidation)                            | 4 | 4 |
| [K].tTPPVLDSDGSFFLYSk.[L]          | N-Term(iTRAQ4plex); K17(iTRAQ4plex)      | 1 | 1 |
| [K].gPSVFPLAPSSk.[S]               | N-Term(iTRAQ4plex); K12(iTRAQ4plex)      | 1 | 1 |
| [R].tPEVtCvVVDVSHEDPEVk.[F]        | N-Term(iTRAQ4plex); C6(Carbamidomethyl)  | 1 | 1 |
| [R].ePQVYTLPPSR.[DE]               | N-Term(iTRAQ4plex)                       | 3 | 3 |
| [K].tLmFGSYLDDEk.[N]               | N-Term(iTRAQ4plex); M3(Oxidation)        | 1 | 1 |
| [K].tLMFGSYLDDEk.[N]               | N-Term(iTRAQ4plex); K12(iTRAQ4plex)      | 1 | 1 |
| [K].tLMFGSYLDDEk.[N]               | N-Term(iTRAQ4plex); K12(iTRAQ4plex)      | 1 | 1 |
| [K].tLMFGSYLDDEk.[N]               | N-Term(iTRAQ4plex); K12(iTRAQ4plex)      | 1 | 1 |
| [R].eHVAHLLFLR.[D]                 | N-Term(iTRAQ4plex)                       | 1 | 1 |
| [R].eHVAHLLFLR.[D]                 | N-Term(iTRAQ4plex)                       | 1 | 1 |
| [R].eHVAHLLFLR.[D]                 | N-Term(iTRAQ4plex)                       | 1 | 1 |
| [R].eHVAHLLFLR.[D]                 | N-Term(iTRAQ4plex)                       | 1 | 1 |
| [R].eHVAHLLFLR.[D]                 | N-Term(iTRAQ4plex)                       | 1 | 1 |
| [K].eQLGEFYALDcLcIPR.[S]           | N-Term(iTRAQ4plex); C12(Carbamidomethyl) | 1 | 1 |
| [K].eQLGEFYALDcLcIPR.[S]           | N-Term(iTRAQ4plex); C12(Carbamidomethyl) | 1 | 1 |
| [K].nWGLSFYADkPETTk.[E]            | N-Term(iTRAQ4plex); K10(iTRAQ4plex)      | 1 | 1 |
| [K].nWGLSFYADkPETTk.[E]            | N-Term(iTRAQ4plex); K10(iTRAQ4plex)      | 1 | 1 |
| [K].nWGLSFYADkPETTk.[E]            | N-Term(iTRAQ4plex); K10(iTRAQ4plex)      | 1 | 1 |
| [K].eQLGEFYALDcLcIPR.[S]           | N-Term(iTRAQ4plex); C12(Carbamidomethyl) | 1 | 1 |
| [K].eQLGEFYALDcLcIPR.[S]           | N-Term(iTRAQ4plex); C12(Carbamidomethyl) | 1 | 1 |
| [K].TEDTIFLR.[E]                   |                                          | 2 | 2 |
| [K].wFYIASAFR.[N]                  | N-Term(iTRAQ4plex)                       | 2 | 2 |
| [K].dkcEPLEk.[Q]                   | N-Term(iTRAQ4plex); K2(iTRAQ4plex)       | 2 | 2 |

|                                   |                                |   |   |
|-----------------------------------|--------------------------------|---|---|
| [K].TEDTIFLR.[E]                  |                                | 2 | 2 |
| [K].dkcEPLEk.[Q]                  | N-Term(iTRAQ4plex); K2(iTRAQ4  | 2 | 2 |
| [R].EHVAHLLFLR.[D]                |                                | 1 | 1 |
| [K].dkcEPLEk.[Q]                  | N-Term(iTRAQ4plex); K2(iTRAQ4  | 2 | 2 |
| [K].tLmFGSYLDDEk.[N]              | N-Term(iTRAQ4plex); M3(Oxidati | 1 | 1 |
| [K].dkcEPLEk.[Q]                  | N-Term(iTRAQ4plex); K2(iTRAQ4  | 2 | 2 |
| [R].eHVAHLLFLR.[D]                | N-Term(iTRAQ4plex)             | 1 | 1 |
| [K].dkcEPLEk.[Q]                  | N-Term(iTRAQ4plex); K2(iTRAQ4  | 2 | 2 |
| [K].tLMFGSYLDDEk.[N]              | N-Term(iTRAQ4plex); K12(iTRAQ  | 1 | 1 |
| [K].wFYIASAFR.[N]                 | N-Term(iTRAQ4plex)             | 2 | 2 |
| [K].dkcEPLEk.[Q]                  | N-Term(iTRAQ4plex); K2(iTRAQ4  | 2 | 2 |
| [K].tLmFGSYLDDEk.[N]              | N-Term(iTRAQ4plex); M3(Oxidati | 1 | 1 |
| [K].DkcEPLEk.[Q]                  | K2(iTRAQ4plex); C3(Carbamidon  | 2 | 2 |
| [K].WFYIASAFR.[N]                 |                                | 2 | 2 |
| [R].eHVAHLLFLR.[D]                | N-Term(iTRAQ4plex)             | 1 | 1 |
| [R].sDVMYTDWk.[K]                 | N-Term(iTRAQ4plex); K9(iTRAQ4  | 1 | 1 |
| [R].eHVAHLLFLR.[D]                | N-Term(iTRAQ4plex)             | 1 | 1 |
| [K].dKcEPLEk.[Q]                  | N-Term(iTRAQ4plex); C3(Carbam  | 2 | 2 |
| [K].vYAcEVTHQGLSSPVtk.[S]         | N-Term(iTRAQ4plex); C4(Carbam  | 1 | 1 |
| [K].vYAcEVTHQGLSSPVtk.[S]         | N-Term(iTRAQ4plex); C4(Carbam  | 1 | 1 |
| [-].tVAAPSVFIFPPSDEQLk.[S]        | N-Term(iTRAQ4plex); K18(iTRAQ  | 1 | 1 |
| [-].tVAAPSVFIFPPSDEQLk.[S]        | N-Term(iTRAQ4plex); K18(iTRAQ  | 1 | 1 |
| [-].tVAAPSVFIFPPSDEQLk.[S]        | N-Term(iTRAQ4plex); K18(iTRAQ  | 1 | 1 |
| [-].tVAAPSVFIFPPSDEQLk.[S]        | N-Term(iTRAQ4plex); K18(iTRAQ  | 1 | 1 |
| [K].dSTYLSSTLTLSk.[A]             | N-Term(iTRAQ4plex); K14(iTRAQ  | 1 | 1 |
| [K].dSTYLSSTLTLSk.[A]             | N-Term(iTRAQ4plex); K14(iTRAQ  | 1 | 1 |
| [-].TVAAPSVFIFPPSDEQLk.[S]        | K18(iTRAQ4plex)                | 1 | 1 |
| [K].sGTASVvcLLNNFYPR.[E]          | N-Term(iTRAQ4plex); C8(Carbam  | 1 | 1 |
| [K].sGTASVvcLLNNFYPR.[E]          | N-Term(iTRAQ4plex); C8(Carbam  | 1 | 1 |
| [K].sGTASVvcLLNNFYPR.[E]          | N-Term(iTRAQ4plex); C8(Carbam  | 1 | 1 |
| [K].vDNALQSGNSQESVTEQDsk.[D]      | N-Term(iTRAQ4plex); K20(iTRAQ  | 1 | 1 |
| [K].vDNALQSGNSQESVTEQDsk.[D]      | N-Term(iTRAQ4plex); K20(iTRAQ  | 1 | 1 |
| [K].vDNALQSGNSQESVTEQDsk.[D]      | N-Term(iTRAQ4plex); K20(iTRAQ  | 1 | 1 |
| [-].TVAAPSVFIFPPSDEQLk.[S]        | K18(iTRAQ4plex)                | 1 | 1 |
| [K].vYAcEVTHQGLSSPVtk.[S]         | N-Term(iTRAQ4plex); C4(Carbam  | 1 | 1 |
| [K].vYAcEVTHQGLSSPVtk.[S]         | N-Term(iTRAQ4plex); C4(Carbam  | 1 | 1 |
| [K].vDNALQSGNSQESVTEQDsk.[D]      | N-Term(iTRAQ4plex); K20(iTRAQ  | 1 | 1 |
| [K].dSTYLSSTLTLSk.[A]             | N-Term(iTRAQ4plex); K14(iTRAQ  | 1 | 1 |
| [K].dSTYLSSTLTLSk.[A]             | N-Term(iTRAQ4plex); K14(iTRAQ  | 1 | 1 |
| [K].dSTYLSSTLTLSk.[A]             | N-Term(iTRAQ4plex); K14(iTRAQ  | 1 | 1 |
| [K].vDNALQSGNSQESVTEQDsk.[D]      | N-Term(iTRAQ4plex); K20(iTRAQ  | 1 | 1 |
| [-].TVAAPSVFIFPPSDEQLk.[S]        | K18(iTRAQ4plex)                | 1 | 1 |
| [K].tPLTATLSk.[S]                 | N-Term(iTRAQ4plex); K9(iTRAQ4  | 1 | 1 |
| [K].TPLTATLSk.[S]                 | K9(iTRAQ4plex)                 | 1 | 1 |
| [R].qEPSQGTTFVAVTSILR.[V]         | N-Term(iTRAQ4plex)             | 2 | 2 |
| [R].qEPSQGTTFVAVTSILR.[V]         | N-Term(iTRAQ4plex)             | 2 | 2 |
| [K].kGDTFScMVGHEALPLAFTQk.[T]     | N-Term(iTRAQ4plex); K1(iTRAQ4  | 2 | 2 |
| [R].dASGVTFWTWPSSGk.[S]           | N-Term(iTRAQ4plex); K15(iTRAQ  | 1 | 1 |
| [R].wLQGSQELPR.[E]                | N-Term(iTRAQ4plex)             | 2 | 2 |
| [R].dLcGcYSVSSVLPgCaePWNHGk.[T]   | N-Term(iTRAQ4plex); C3(Carbam  | 1 | 1 |
| [R].nFPPSQDASGDLYTSSQLTLPATQcLAGk | N-Term(iTRAQ4plex); C26(Carbar | 1 | 1 |
| [R].nFPPSQDASGDLYTSSQLTLPATQcLAGk | N-Term(iTRAQ4plex); C26(Carbar | 1 | 1 |

|                                   |                                |   |   |
|-----------------------------------|--------------------------------|---|---|
| [K].sAVQGPPER.[D]                 | N-Term(iTRAQ4plex)             | 2 | 2 |
| [R].nFPPSQDASGDLYTSSQLTLPATQcLAGk | N-Term(iTRAQ4plex); C26(Carbar | 1 | 1 |
| [K].sAVQGPPER.[D]                 | N-Term(iTRAQ4plex)             | 2 | 2 |
| [K].kGDTFScMVGHEALPLAFTQk.[T]     | N-Term(iTRAQ4plex); K1(iTRAQ4  | 2 | 2 |
| [K].tPLTATLSk.[S]                 | N-Term(iTRAQ4plex); K9(iTRAQ4  | 1 | 1 |
| [K].tFTcTAAYPESk.[T]              | N-Term(iTRAQ4plex); C4(Carbam  | 1 | 1 |
| [R].dASGVFTWTPSSGk.[S]            | N-Term(iTRAQ4plex); K15(iTRAQ  | 1 | 1 |
| [K].sVTcHVk.[H]                   | N-Term(iTRAQ4plex); C4(Carbam  | 2 | 2 |
| [RK].iDVcPENAEVTLTDFR.[A]         | N-Term(iTRAQ4plex); C4(Carbam  | 2 | 2 |
| [R].wFLQHRPQVGyIR.[V]             | N-Term(iTRAQ4plex)             | 2 | 2 |
| [K].dSDGDGIGDAcDNcPQk.[S]         | N-Term(iTRAQ4plex); C11(Carbar | 1 | 1 |
| [R].dGVGDVcQDDFDADk.[V]           | N-Term(iTRAQ4plex); C7(Carbam  | 1 | 1 |
| [R].dGVGDVcQDDFDADk.[V]           | N-Term(iTRAQ4plex); C7(Carbam  | 1 | 1 |
| [R].dTDLDGFPDEK.[L]               | N-Term(iTRAQ4plex); K11(iTRAQ  | 1 | 1 |
| [R].dTDLDGFPDEK.[L]               | N-Term(iTRAQ4plex); K11(iTRAQ  | 1 | 1 |
| [R].dTDLDGFPDEK.[L]               | N-Term(iTRAQ4plex); K11(iTRAQ  | 1 | 1 |
| [R].aVAEPGIQLk.[A]                | N-Term(iTRAQ4plex); K10(iTRAQ  | 2 | 2 |
| [K].sSTGPGEQLR.[N]                | N-Term(iTRAQ4plex)             | 1 | 1 |
| [K].dSDGDGIGDAcDNcPQk.[S]         | N-Term(iTRAQ4plex); C11(Carbar | 1 | 1 |
| [R].nALWHTGDTESQVR.[L]            | N-Term(iTRAQ4plex)             | 1 | 1 |
| [R].fNAVLNPNQGDYDTSTGk.[F]        | N-Term(iTRAQ4plex); K18(iTRAQ  | 1 | 1 |
| [R].fNAVLNPNQGDYDTSTGk.[F]        | N-Term(iTRAQ4plex); K18(iTRAQ  | 1 | 1 |
| [K].vVTFcGHTSk.[T]                | N-Term(iTRAQ4plex); C5(Carbam  | 1 | 1 |
| [K].vVTFcGHTSk.[T]                | N-Term(iTRAQ4plex); C5(Carbam  | 1 | 1 |
| [K].tnQVNSGGVLLR.[L]              | N-Term(iTRAQ4plex)             | 1 | 1 |
| [R].fNAVLNPNQGDYDTSTGk.[F]        | N-Term(iTRAQ4plex); K18(iTRAQ  | 1 | 1 |
| [R].fNAVLNPNQGDYDTSTGk.[F]        | N-Term(iTRAQ4plex); K18(iTRAQ  | 1 | 1 |
| [R].QTHQPPAPNSLIR.[F]             |                                | 1 | 1 |
| [R].qTHQPPAPNSLIR.[F]             | N-Term(iTRAQ4plex)             | 1 | 1 |
| [K].fQSVFTVTR.[Q]                 | N-Term(iTRAQ4plex)             | 1 | 1 |
| [R].fNAVLNPNQGDYDTSTGk.[F]        | N-Term(iTRAQ4plex); K18(iTRAQ  | 1 | 1 |
| [R].QTHQPPAPNSLIR.[F]             |                                | 1 | 1 |
| [K].fQSVFTVTR.[Q]                 | N-Term(iTRAQ4plex)             | 1 | 1 |
| [R].FNAVLNPNQGDYDTSTGk.[F]        | K18(iTRAQ4plex)                | 1 | 1 |
| [K].fQSVFTVTR.[Q]                 | N-Term(iTRAQ4plex)             | 1 | 1 |
| [R].dTGTYGFLLPER.[Y]              | N-Term(iTRAQ4plex)             | 1 | 1 |
| [R].dTGTYGFLLPER.[Y]              | N-Term(iTRAQ4plex)             | 1 | 1 |
| [K].iHIGSSFek.[Y]                 | N-Term(iTRAQ4plex); K9(iTRAQ4  | 1 | 1 |
| [R].sFYANNHcIGTDLNR.[N]           | N-Term(iTRAQ4plex); C8(Carbam  | 1 | 1 |
| [K].nAIWIDcGIHAR.[E]              | N-Term(iTRAQ4plex); C7(Carbam  | 1 | 1 |
| [K].nAIWIDcGIHAR.[E]              | N-Term(iTRAQ4plex); C7(Carbam  | 1 | 1 |
| [K].skDHEELSLVASEAVR.[A]          | N-Term(iTRAQ4plex); K2(iTRAQ4  | 1 | 1 |
| [K].skDHEELSLVASEAVR.[A]          | N-Term(iTRAQ4plex); K2(iTRAQ4  | 1 | 1 |
| [K].skDHEELSLVASEAVR.[A]          | N-Term(iTRAQ4plex); K2(iTRAQ4  | 1 | 1 |
| [R].dTGTYGFLLPER.[Y]              | N-Term(iTRAQ4plex)             | 1 | 1 |
| [K].iHIGSSFek.[Y]                 | N-Term(iTRAQ4plex); K9(iTRAQ4  | 1 | 1 |
| [R].qRPEVFSNDMfcVGDEtQR.[H]       | N-Term(iTRAQ4plex); C12(Carbar | 1 | 1 |
| [R].gGALLGDR.[W]                  | N-Term(iTRAQ4plex)             | 2 | 2 |
| [K].vLSYVDWIk.[G]                 | N-Term(iTRAQ4plex); K9(iTRAQ4  | 1 | 1 |
| [R].wILTAHTIYPk.[DE]              | N-Term(iTRAQ4plex); K12(iTRAQ  | 1 | 1 |
| [R].wILTAHTIYPk.[DE]              | N-Term(iTRAQ4plex); K12(iTRAQ  | 1 | 1 |
| [R].eAcNAWLQk.[R]                 | N-Term(iTRAQ4plex); C3(Carbam  | 1 | 1 |

|                                  |                                          |   |   |
|----------------------------------|------------------------------------------|---|---|
| [R].vVHPDYR.[Q]                  | N-Term(iTRAQ4plex)                       | 1 | 1 |
| [R].gSEAINAPGDNPak.[V]           | N-Term(iTRAQ4plex); K14(iTRAQ4plex)      | 1 | 1 |
| [R].vVHPDYR.[Q]                  | N-Term(iTRAQ4plex)                       | 1 | 1 |
| [R].wILTAHTIYPk.[DE]             | N-Term(iTRAQ4plex); K12(iTRAQ4plex)      | 1 | 1 |
| [R].wILTAHTIYPk.[DE]             | N-Term(iTRAQ4plex); K12(iTRAQ4plex)      | 1 | 1 |
| [R].nPNLPPETVDSLk.[N]            | N-Term(iTRAQ4plex); K13(iTRAQ4plex)      | 1 | 1 |
| [R].nPNLPPETVDSLk.[N]            | N-Term(iTRAQ4plex); K13(iTRAQ4plex)      | 1 | 1 |
| [R].nPNLPPETVDSLk.[N]            | N-Term(iTRAQ4plex); K13(iTRAQ4plex)      | 1 | 1 |
| [R].nPNLPPETVDSLk.[N]            | N-Term(iTRAQ4plex); K13(iTRAQ4plex)      | 1 | 1 |
| [R].nPNLPPETVDSLk.[N]            | N-Term(iTRAQ4plex); K13(iTRAQ4plex)      | 1 | 1 |
| [R].nPNLPPETVDSLk.[N]            | N-Term(iTRAQ4plex); K13(iTRAQ4plex)      | 1 | 1 |
| [R].nPNLPPETVDSLk.[N]            | N-Term(iTRAQ4plex); K13(iTRAQ4plex)      | 1 | 1 |
| [K].cPNPPVQENFDVNk.[Y]           | N-Term(iTRAQ4plex); C1(Carbamidomethyl)  | 1 | 1 |
| [R].nPNLPPETVDSLk.[N]            | N-Term(iTRAQ4plex); K13(iTRAQ4plex)      | 1 | 1 |
| [K].nILTSNNIDVk.[K]              | N-Term(iTRAQ4plex); K11(iTRAQ4plex)      | 1 | 1 |
| [R].nPNLPPETVDSLk.[N]            | N-Term(iTRAQ4plex); K13(iTRAQ4plex)      | 1 | 1 |
| [R].nPNLPPETVDSLk.[N]            | N-Term(iTRAQ4plex); K13(iTRAQ4plex)      | 1 | 1 |
| [K].mTVTDQVNcPk.[L]              | N-Term(iTRAQ4plex); M1(Oxidation)        | 1 | 1 |
| [K].cPNPPVQENFDVNk.[Y]           | N-Term(iTRAQ4plex); C1(Carbamidomethyl)  | 1 | 1 |
| [K].nILTSNNIDVk.[K]              | N-Term(iTRAQ4plex); K11(iTRAQ4plex)      | 1 | 1 |
| [R].nPNLPPETVDSLk.[N]            | N-Term(iTRAQ4plex); K13(iTRAQ4plex)      | 1 | 1 |
| [K].kMTVTDQVNcPk.[L]             | N-Term(iTRAQ4plex); K1(iTRAQ4plex)       | 1 | 1 |
| [R].nPNLPPETVDSLk.[N]            | N-Term(iTRAQ4plex); K13(iTRAQ4plex)      | 1 | 1 |
| [K].nILTSNNIDVk.[K]              | N-Term(iTRAQ4plex); K11(iTRAQ4plex)      | 1 | 1 |
| [R].nPNLPPETVDSLk.[N]            | N-Term(iTRAQ4plex); K13(iTRAQ4plex)      | 1 | 1 |
| [K].vQVLLGAHLSQSPEPSk.[R]        | N-Term(iTRAQ4plex); K17(iTRAQ4plex)      | 1 | 1 |
| [R].dVAPGTLcDVAGWGIvNHAGR.[R]    | N-Term(iTRAQ4plex); C8(Carbamidomethyl)  | 1 | 1 |
| [R].rPDSLQHVLLPVLDLDR.[A]        | N-Term(iTRAQ4plex)                       | 1 | 1 |
| [R].rPDSLQHVLLPVLDLDR.[A]        | N-Term(iTRAQ4plex)                       | 1 | 1 |
| [R].rPDSLQHVLLPVLDLDR.[A]        | N-Term(iTRAQ4plex)                       | 1 | 1 |
| [R].aVPHPDSPDTIDHLLLLQLSEK.[A]   | N-Term(iTRAQ4plex); K24(iTRAQ4plex)      | 1 | 1 |
| [K].vQVLLGAHLSQSPEPSk.[R]        | N-Term(iTRAQ4plex); K17(iTRAQ4plex)      | 1 | 1 |
| [K].vQVLLGAHLSQSPEPSk.[L]        | N-Term(iTRAQ4plex); K17(iTRAQ4plex)      | 1 | 1 |
| [R].wDLQHPHQHPFEPGk.[F]          | N-Term(iTRAQ4plex); K15(iTRAQ4plex)      | 1 | 2 |
| [R].wDLQHPHQHPFEPGk.[F]          | N-Term(iTRAQ4plex); K15(iTRAQ4plex)      | 1 | 2 |
| [R].wDLQHPHQHPFEPGk.[F]          | N-Term(iTRAQ4plex); K15(iTRAQ4plex)      | 1 | 2 |
| [R].gTELQHLLHAVVPGPWQEDVADAEcAGI | N-Term(iTRAQ4plex); C26(Carbamidomethyl) | 1 | 2 |
| [K].eQWILTAR.[Q]                 | N-Term(iTRAQ4plex)                       | 1 | 2 |
| [K].eQWILTAR.[Q]                 | N-Term(iTRAQ4plex)                       | 1 | 2 |
| [R].vSVFVDWIHk.[V]               | N-Term(iTRAQ4plex); K10(iTRAQ4plex)      | 1 | 2 |
| [R].nPDGSERPWcYTTDPQIER.[E]      | N-Term(iTRAQ4plex); C10(Carbamidomethyl) | 1 | 2 |
| [K].wLTFSLGk.[Q]                 | N-Term(iTRAQ4plex); K8(iTRAQ4plex)       | 1 | 1 |
| [K].eEAFLGITDEK.[T]              | N-Term(iTRAQ4plex); K11(iTRAQ4plex)      | 1 | 1 |
| [K].sPDGDSSLAASER.[K]            | N-Term(iTRAQ4plex)                       | 1 | 1 |
| [K].tEGQFVDLTGNR.[L]             | N-Term(iTRAQ4plex)                       | 1 | 1 |
| [K].tEGQFVDLTGNR.[L]             | N-Term(iTRAQ4plex)                       | 1 | 1 |
| [K].eEAFLGITDEK.[T]              | N-Term(iTRAQ4plex); K11(iTRAQ4plex)      | 1 | 1 |
| [K].sPDGDSSLAASER.[K]            | N-Term(iTRAQ4plex)                       | 1 | 1 |
| [R].gLQGPPGk.[L]                 | N-Term(iTRAQ4plex); K8(iTRAQ4plex)       | 1 | 1 |
| [K].hDTSkPISVSYNPATAk.[E]        | N-Term(iTRAQ4plex); K6(iTRAQ4plex)       | 1 | 1 |
| [K].aDGLAVIGVLMk.[V]             | N-Term(iTRAQ4plex); K12(iTRAQ4plex)      | 1 | 1 |
| [M].aSPDWGYDDk.[N]               | N-Term(Prot)(Acetyl); K10(iTRAQ4plex)    | 1 | 1 |
| [K].vLDALQAIk.[T]                | N-Term(iTRAQ4plex); K9(iTRAQ4plex)       | 1 | 1 |

|                               |                                       |   |   |
|-------------------------------|---------------------------------------|---|---|
| [K].VLDALQAIk.[T]             | K9(iTRAQ4plex)                        | 1 | 1 |
| [M].aSPDWGYDDk.[N]            | N-Term(Prot)(Acetyl); K10(iTRAQ4plex) | 1 | 1 |
| [K].aDGLAVIGVLMk.[V]          | N-Term(iTRAQ4plex); K12(iTRAQ4plex)   | 1 | 1 |
| [K].eSISVSSEQLAQFR.[S]        | N-Term(iTRAQ4plex)                    | 1 | 1 |
| [R].wEDILSDEVNVAR.[G]         | N-Term(iTRAQ4plex)                    | 1 | 1 |
| [R].IYLQMSTHGk.[V]            | N-Term(iTRAQ4plex); K10(iTRAQ4plex)   | 1 | 1 |
| [R].eHGDPLIEELNPGDALEPEGR.[G] | N-Term(iTRAQ4plex)                    | 1 | 1 |
| [R].gVASLFAGR.[S]             | N-Term(iTRAQ4plex)                    | 1 | 1 |
| [K].dEASSVEVTWPDGk.[M]        | N-Term(iTRAQ4plex); K14(iTRAQ4plex)   | 1 | 1 |
| [R].gSVQYLPDLDDk.[N]          | N-Term(iTRAQ4plex); K12(iTRAQ4plex)   | 1 | 1 |
| [K].aIFYMNNPSR.[V]            | N-Term(iTRAQ4plex)                    | 1 | 1 |
| [R].aSSQWVVGPSYFVEYLk.[E]     | N-Term(iTRAQ4plex); K18(iTRAQ4plex)   | 1 | 1 |
| [K].aIFYMNNPSR.[V]            | N-Term(iTRAQ4plex)                    | 1 | 1 |
| [R].iFFESVYGQck.[A]           | N-Term(iTRAQ4plex); C10(Carbamoyl)    | 1 | 1 |
| [R].vNDAQEYR.[R]              | N-Term(iTRAQ4plex)                    | 1 | 1 |
| [R].iFFESVYGQck.[A]           | N-Term(iTRAQ4plex); C10(Carbamoyl)    | 1 | 1 |
| [K].aIFYMNNPSR.[V]            | N-Term(iTRAQ4plex)                    | 1 | 1 |
| [K].yVRPGGGFVPNFQLFEK.[G]     | N-Term(iTRAQ4plex); K17(iTRAQ4plex)   | 1 | 1 |
| [K].fLVGPDGIPIMR.[W]          | N-Term(iTRAQ4plex)                    | 1 | 1 |
| [K].qEPGENSEILPTLk.[Y]        | N-Term(iTRAQ4plex); K14(iTRAQ4plex)   | 1 | 1 |
| [R].tTVSNVk.[M]               | N-Term(iTRAQ4plex); K7(iTRAQ4plex)    | 1 | 1 |
| [K].fLVGPDGIPIMR.[W]          | N-Term(iTRAQ4plex)                    | 1 | 1 |
| [K].yVRPGGGFVPNFQLFEK.[G]     | N-Term(iTRAQ4plex); K17(iTRAQ4plex)   | 1 | 1 |
| [K].mDILSYMR.[R]              | N-Term(iTRAQ4plex)                    | 1 | 1 |
| [R].mHAAFGGTFk.[K]            | N-Term(iTRAQ4plex); K10(iTRAQ4plex)   | 1 | 1 |
| [R].fLEQELETITIPDLR.[G]       | N-Term(iTRAQ4plex)                    | 1 | 1 |
| [R].aVEPQLQEEER.[M]           | N-Term(iTRAQ4plex)                    | 1 | 1 |
| [R].gAFFPLTER.[N]             | N-Term(iTRAQ4plex)                    | 1 | 1 |
| [R].sSVDELVIGIDYSLMk.[D]      | N-Term(iTRAQ4plex); K15(iTRAQ4plex)   | 1 | 1 |
| [K].iTHVHVHMR.[Y]             | N-Term(iTRAQ4plex)                    | 1 | 1 |
| [K].rAPDLQDLPWQVv.[L]         | N-Term(iTRAQ4plex); K13(iTRAQ4plex)   | 1 | 1 |
| [K].dFAEHLIPR.[T]             | N-Term(iTRAQ4plex)                    | 1 | 1 |
| [R].eNFVLTtak.[C]             | N-Term(iTRAQ4plex); K9(iTRAQ4plex)    | 1 | 1 |
| [R].eNFVLTtak.[C]             | N-Term(iTRAQ4plex); K9(iTRAQ4plex)    | 1 | 1 |
| [R].sSVAAMHWMDSVTR.[E]        | N-Term(iTRAQ4plex)                    | 1 | 1 |
| [K].yIFSDSSQLTIk.[K]          | N-Term(iTRAQ4plex); K13(iTRAQ4plex)   | 1 | 1 |
| [K].aGEQDATIHlk.[V]           | N-Term(iTRAQ4plex); K11(iTRAQ4plex)   | 1 | 1 |
| [K].gLGEISAASEFk.[T]          | N-Term(iTRAQ4plex); K12(iTRAQ4plex)   | 1 | 1 |
| [R].avGEEVWHSk.[W]            | N-Term(iTRAQ4plex); K10(iTRAQ4plex)   | 1 | 1 |
| [R].vSSLTLk.[S]               | N-Term(iTRAQ4plex); K7(iTRAQ4plex)    | 1 | 1 |
| [K].gLGEISAASEFk.[T]          | N-Term(iTRAQ4plex); K12(iTRAQ4plex)   | 1 | 1 |
| [K].sNLISGSVMYIEEk.[T]        | N-Term(iTRAQ4plex); K14(iTRAQ4plex)   | 1 | 1 |
| [K].IVcSGLLQASK.[S]           | N-Term(iTRAQ4plex); C3(Carbamoyl)     | 1 | 1 |
| [K].IFLSYDYAVk.[K]            | N-Term(iTRAQ4plex); K10(iTRAQ4plex)   | 1 | 1 |
| [K].iFSQETLtk.[A]             | N-Term(iTRAQ4plex); K9(iTRAQ4plex)    | 1 | 1 |
| [R].tLLETlQk.[A]              | N-Term(iTRAQ4plex); K8(iTRAQ4plex)    | 1 | 1 |
| [R].tLLETlQk.[A]              | N-Term(iTRAQ4plex); K8(iTRAQ4plex)    | 1 | 1 |
| [K].sPYQLVLQHSR.[L]           | N-Term(iTRAQ4plex)                    | 1 | 1 |
| [K].dGTPPIDAHTR.[N]           | N-Term(iTRAQ4plex)                    | 1 | 1 |
| [R].KYFTNck.[Q]               | N-Term(iTRAQ4plex); K1(iTRAQ4plex)    | 1 | 1 |
| [R].dLLNNHILk.[S]             | N-Term(iTRAQ4plex); K9(iTRAQ4plex)    | 1 | 1 |
| [R].vLTDELk.[H]               | N-Term(iTRAQ4plex); K7(iTRAQ4plex)    | 1 | 1 |





|                                 |                                          |   |   |
|---------------------------------|------------------------------------------|---|---|
| [R].gWVTDGFSSLk.[D]             | N-Term(iTRAQ4plex); K11(iTRAQ4plex)      | 1 | 1 |
| [R].gWVTDGFSSLk.[D]             | N-Term(iTRAQ4plex); K11(iTRAQ4plex)      | 1 | 1 |
| [R].gWVTDGFSSLk.[D]             | N-Term(iTRAQ4plex); K11(iTRAQ4plex)      | 1 | 1 |
| [K].fSEFWDLDPVRPTSAVAA.[-]      | N-Term(iTRAQ4plex)                       | 1 | 1 |
| [K].dALSSVQESQVAQQAR.[G]        | N-Term(iTRAQ4plex)                       | 1 | 1 |
| [K].DALSSVQESQVAQQAR.[G]        |                                          | 1 | 1 |
| [K].dALSSVQESQVAQQAR.[G]        | N-Term(iTRAQ4plex)                       | 1 | 1 |
| [K].dALSSVQESQVAQQAR.[G]        | N-Term(iTRAQ4plex)                       | 1 | 1 |
| [K].dALSSVQESQVAQQAR.[G]        | N-Term(iTRAQ4plex)                       | 1 | 1 |
| [K].dALSSVQESQVAQQAR.[G]        | N-Term(iTRAQ4plex)                       | 1 | 1 |
| [K].dYWSTVtk.[D]                | N-Term(iTRAQ4plex); K7(iTRAQ4plex)       | 1 | 1 |
| [R].gWVTDGFSSLk.[D]             | N-Term(iTRAQ4plex); K11(iTRAQ4plex)      | 1 | 1 |
| [R].gWVTDGFSSLk.[D]             | N-Term(iTRAQ4plex); K11(iTRAQ4plex)      | 1 | 1 |
| [R].GWVTDGFSSLk.[D]             | K11(iTRAQ4plex)                          | 1 | 1 |
| [K].dkFSEFWDLDPVRPTSAVAA.[-]    | N-Term(iTRAQ4plex); K2(iTRAQ4plex)       | 1 | 1 |
| [R].gWVTDGFSSLk.[D]             | N-Term(iTRAQ4plex); K11(iTRAQ4plex)      | 1 | 1 |
| [K].dYWSTVtk.[D]                | N-Term(iTRAQ4plex); K7(iTRAQ4plex)       | 1 | 1 |
| [K].dALSSVQESQVAQQAR.[G]        | N-Term(iTRAQ4plex)                       | 1 | 1 |
| [K].dYWSTVtk.[D]                | N-Term(iTRAQ4plex); K7(iTRAQ4plex)       | 1 | 1 |
| [K].dYWSTVtk.[D]                | N-Term(iTRAQ4plex); K7(iTRAQ4plex)       | 1 | 1 |
| [K].dYWSTVtk.[D]                | N-Term(iTRAQ4plex); K7(iTRAQ4plex)       | 1 | 1 |
| [K].dYWSTVtk.[D]                | N-Term(iTRAQ4plex); K7(iTRAQ4plex)       | 1 | 1 |
| [K].dALSSVQESQVAQQAR.[G]        | N-Term(iTRAQ4plex)                       | 1 | 1 |
| [K].DALSSVQESQVAQQAR.[G]        |                                          | 1 | 1 |
| [R].IDTLAQEVALlk.[E]            | N-Term(iTRAQ4plex); K12(iTRAQ4plex)      | 1 | 1 |
| [R].IDTLAQEVALlk.[E]            | N-Term(iTRAQ4plex); K12(iTRAQ4plex)      | 1 | 1 |
| [R].IDTLAQEVALlk.[E]            | N-Term(iTRAQ4plex); K12(iTRAQ4plex)      | 1 | 1 |
| [R].IDTLAQEVALlk.[E]            | N-Term(iTRAQ4plex); K12(iTRAQ4plex)      | 1 | 1 |
| [K].TFHEASEDcISR.[G]            | C9(Carbamidomethyl)                      | 1 | 1 |
| [K].nWETEITAQPDGGk.[T]          | N-Term(iTRAQ4plex); K14(iTRAQ4plex)      | 1 | 1 |
| [K].nWETEITAQPDGGk.[T]          | N-Term(iTRAQ4plex); K14(iTRAQ4plex)      | 1 | 1 |
| [K].tFHEASEDcISR.[G]            | N-Term(iTRAQ4plex); C9(Carbamidomethyl)  | 1 | 1 |
| [K].tFHEASEDcISR.[G]            | N-Term(iTRAQ4plex); C9(Carbamidomethyl)  | 1 | 1 |
| [K].TFHEASEDcISR.[G]            | C9(Carbamidomethyl)                      | 1 | 1 |
| [K].eQQALQTVcLk.[G]             | N-Term(iTRAQ4plex); C9(Carbamidomethyl)  | 1 | 1 |
| [K].TFHEASEDcISR.[G]            | C9(Carbamidomethyl)                      | 1 | 1 |
| [K].TFHEASEDcISR.[G]            | C9(Carbamidomethyl)                      | 1 | 1 |
| [K].TFHEASEDcISR.[G]            | C9(Carbamidomethyl)                      | 1 | 1 |
| [K].kDVVNTk.[M]                 | K1(iTRAQ4plex); K7(iTRAQ4plex)           | 1 | 1 |
| [K].kDVVNTk.[M]                 | N-Term(iTRAQ4plex); K7(iTRAQ4plex)       | 1 | 1 |
| [K].TFHEASEDcISR.[G]            | C9(Carbamidomethyl)                      | 1 | 1 |
| [K].kDVVNTk.[M]                 | N-Term(iTRAQ4plex); K1(iTRAQ4plex)       | 1 | 1 |
| [K].TFHEASEDcISR.[G]            | C9(Carbamidomethyl)                      | 1 | 1 |
| [K].cFLAFTQtk.[T]               | N-Term(iTRAQ4plex); C1(Carbamidomethyl)  | 1 | 1 |
| [K].kDVVNTk.[M]                 | N-Term(iTRAQ4plex); K1(iTRAQ4plex)       | 1 | 1 |
| [R].wDEELAAFAk.[A]              | N-Term(iTRAQ4plex); K10(iTRAQ4plex)      | 1 | 1 |
| [R].wDEELAAFAk.[A]              | N-Term(iTRAQ4plex); K10(iTRAQ4plex)      | 1 | 1 |
| [K].IQGVEETNIELLVcNYEPPGNVk.[G] | N-Term(iTRAQ4plex); C14(Carbamidomethyl) | 1 | 1 |
| [R].qcVWGHnk.[E]                | N-Term(iTRAQ4plex); C2(Carbamidomethyl)  | 1 | 1 |
| [R].qcVWGHnk.[E]                | N-Term(iTRAQ4plex); C2(Carbamidomethyl)  | 1 | 1 |
| [R].iGcGSHFcEk.[L]              | N-Term(iTRAQ4plex); C3(Carbamidomethyl)  | 1 | 1 |
| [R].IMVELHNLYR.[A]              | N-Term(iTRAQ4plex)                       | 1 | 1 |

|                               |                                          |   |   |
|-------------------------------|------------------------------------------|---|---|
| [R].aQVSPASDMLHMR.[W]         | N-Term(iTRAQ4plex)                       | 1 | 1 |
| [R].wDEELAAFAk.[A]            | N-Term(iTRAQ4plex); K10(iTRAQ4plex)      | 1 | 1 |
| [R].iGcGSHFcEk.[L]            | N-Term(iTRAQ4plex); C3(Carbamidomethyl)  | 1 | 1 |
| [R].rDVQNVAAPELAMGALEESR.[N]  | N-Term(iTRAQ4plex)                       | 1 | 1 |
| [R].sALYSPSDPLTLQADTVR.[G]    | N-Term(iTRAQ4plex)                       | 1 | 1 |
| [R].IAGAPSEDPOQFpk.[V]        | N-Term(iTRAQ4plex); K13(iTRAQ4plex)      | 1 | 1 |
| [R].eLcSAcHNER.[L]            | N-Term(iTRAQ4plex); C3(Carbamidomethyl)  | 1 | 1 |
| [K].fVAVLak.[Y]               | N-Term(iTRAQ4plex); K7(iTRAQ4plex)       | 1 | 1 |
| [R].eVALDLSQHK.[G]            | N-Term(iTRAQ4plex); K10(iTRAQ4plex)      | 1 | 1 |
| [R].sALYSPSDPLTLQADTVR.[G]    | N-Term(iTRAQ4plex)                       | 1 | 1 |
| [K].mQILEGLGLNLQk.[S]         | N-Term(iTRAQ4plex); K13(iTRAQ4plex)      | 1 | 1 |
| [K].tLYLADTFPTNFR.[D]         | N-Term(iTRAQ4plex)                       | 1 | 1 |
| [K].aVVEVDESGTR.[A]           | N-Term(iTRAQ4plex)                       | 1 | 1 |
| [K].aVVEVDESGTR.[A]           | N-Term(iTRAQ4plex)                       | 1 | 1 |
| [K].aVVEVDESGTR.[A]           | N-Term(iTRAQ4plex)                       | 1 | 1 |
| [R].eDQYHYLLDR.[N]            | N-Term(iTRAQ4plex)                       | 1 | 1 |
| [K].fSIEGSYQLEk.[V]           | N-Term(iTRAQ4plex); K11(iTRAQ4plex)      | 1 | 1 |
| [R].qLELYLPk.[F]              | N-Term(iTRAQ4plex); K8(iTRAQ4plex)       | 1 | 1 |
| [K].fSIEGSYQLEk.[V]           | N-Term(iTRAQ4plex); K11(iTRAQ4plex)      | 1 | 1 |
| [R].eDQYHYLLDR.[N]            | N-Term(iTRAQ4plex)                       | 1 | 1 |
| [R].vIGGLLAGQTYHVAVVcYLR.[S]  | N-Term(iTRAQ4plex); C17(Carbamidomethyl) | 1 | 1 |
| [K].ILTPITTLTSEQIQk.[L]       | N-Term(iTRAQ4plex); K15(iTRAQ4plex)      | 1 | 1 |
| [R].IQPVLQPLPSPGVGGk.[R]      | N-Term(iTRAQ4plex); K16(iTRAQ4plex)      | 1 | 1 |
| [K].sDDEVDDPAVELk.[Q]         | N-Term(iTRAQ4plex); K13(iTRAQ4plex)      | 1 | 1 |
| [R].GMTQLQGTR.[A]             |                                          | 1 | 1 |
| [R].ATYHGSFSTkk.[S]           | K10(iTRAQ4plex); K11(iTRAQ4plex)         | 1 | 1 |
| [K].sLEVTFPTVIEDIGk.[V]       | N-Term(iTRAQ4plex); K15(iTRAQ4plex)      | 1 | 1 |
| [K].sQEFLEDADR.[K]            | N-Term(iTRAQ4plex)                       | 1 | 1 |
| [RK].IEIDLLk.[GS]             | N-Term(iTRAQ4plex); K7(iTRAQ4plex)       | 1 | 2 |
| [R].IEIEllk.[G]               | N-Term(iTRAQ4plex); K7(iTRAQ4plex)       | 1 | 1 |
| [K].IHIDDMEFEPk.[Q]           | N-Term(iTRAQ4plex); K11(iTRAQ4plex)      | 1 | 1 |
| [K].IHIDEMDSVPTVR.[Q]         | N-Term(iTRAQ4plex)                       | 1 | 1 |
| [R].aFPALTSLDLSDNPGLGER.[G]   | N-Term(iTRAQ4plex)                       | 1 | 1 |
| [K].eLTLEDLk.[I]              | N-Term(iTRAQ4plex); K8(iTRAQ4plex)       | 1 | 1 |
| [R].gLMAALcPHk.[F]            | N-Term(iTRAQ4plex); C7(Carbamidomethyl)  | 1 | 1 |
| [R].gLMAALcPHk.[F]            | N-Term(iTRAQ4plex); C7(Carbamidomethyl)  | 1 | 1 |
| [K].ITGTMPPLPLEATGLALSSLR.[L] | N-Term(iTRAQ4plex)                       | 1 | 1 |
| [R].aFPALTSLDLSDNPGLGER.[G]   | N-Term(iTRAQ4plex)                       | 1 | 1 |
| [R].qYADTVk.[A]               | N-Term(iTRAQ4plex); K7(iTRAQ4plex)       | 1 | 1 |
| [K].vLSIAQAHSPAfScEQVR.[A]    | N-Term(iTRAQ4plex); C14(Carbamidomethyl) | 1 | 1 |
| [R].gLHLQALKPTKPGLLPSLFk.[G]  | N-Term(iTRAQ4plex); K8(iTRAQ4plex)       | 1 | 1 |
| [R].IMNHYINK.[E]              | N-Term(iTRAQ4plex); K8(iTRAQ4plex)       | 1 | 1 |
| [K].yEMHELLR.[Q]              | N-Term(iTRAQ4plex)                       | 1 | 1 |
| [K].IFDEINPETk.[L]            | N-Term(iTRAQ4plex); K10(iTRAQ4plex)      | 1 | 1 |
| [K].IFDEINPETk.[L]            | N-Term(iTRAQ4plex); K10(iTRAQ4plex)      | 1 | 1 |
| [R].yFDTEcVPMNFR.[N]          | N-Term(iTRAQ4plex); C6(Carbamidomethyl)  | 1 | 1 |
| [R].nLELGLTQGSFAFIHK.[D]      | N-Term(iTRAQ4plex); K16(iTRAQ4plex)      | 1 | 1 |
| [K].yGFcEAADQFHVLDEVR.[R]     | N-Term(iTRAQ4plex); C4(Carbamidomethyl)  | 1 | 1 |
| [K].yGFcEAADQFHVLDEVR.[R]     | N-Term(iTRAQ4plex); C4(Carbamidomethyl)  | 1 | 1 |
| [K].yGFcEAADQFHVLDEVR.[R]     | N-Term(iTRAQ4plex); C4(Carbamidomethyl)  | 1 | 1 |
| [R].rPASPISTIQPk.[A]          | N-Term(iTRAQ4plex); K12(iTRAQ4plex)      | 1 | 1 |
| [R].kLDGicWQVR.[Q]            | N-Term(iTRAQ4plex); K1(iTRAQ4plex)       | 1 | 1 |

|                                   |                                     |   |   |
|-----------------------------------|-------------------------------------|---|---|
| [R].aEATTLHVAPQGTAMAVSTFR.[K]     | N-Term(iTRAQ4plex)                  | 1 | 1 |
| [R].aEATTLHVAPQGTAMAVSTFR.[K]     | N-Term(iTRAQ4plex)                  | 1 | 1 |
| [R].vQEAHLTEDQIFYFPk.[Y]          | N-Term(iTRAQ4plex); K16(iTRAQ4plex) | 1 | 1 |
| [R].sLPVSDSVLSGFQR.[V]            | N-Term(iTRAQ4plex)                  | 1 | 1 |
| [R].kLDGlcWQVR.[Q]                | N-Term(iTRAQ4plex); K1(iTRAQ4plex)  | 1 | 1 |
| [R].vQEAHLTEDQIFYFPk.[Y]          | N-Term(iTRAQ4plex); K16(iTRAQ4plex) | 1 | 1 |
| [R].rPASPISTIQPk.[A]              | N-Term(iTRAQ4plex); K12(iTRAQ4plex) | 1 | 1 |
| [R].kLDGlcWQVR.[Q]                | N-Term(iTRAQ4plex); K1(iTRAQ4plex)  | 1 | 1 |
| [R].kLDGlcWQVR.[Q]                | N-Term(iTRAQ4plex); K1(iTRAQ4plex)  | 1 | 1 |
| [R].sLPVSDSVLSGFQR.[V]            | N-Term(iTRAQ4plex)                  | 1 | 1 |
| [R].fLQEQGHR.[A]                  | N-Term(iTRAQ4plex)                  | 1 | 1 |
| [R].aEATTLHVAPQGTAMAVSTFR.[K]     | N-Term(iTRAQ4plex)                  | 1 | 1 |
| [R].fLQEQGHR.[A]                  | N-Term(iTRAQ4plex)                  | 1 | 1 |
| [R].fLQEQGHR.[A]                  | N-Term(iTRAQ4plex)                  | 1 | 1 |
| [R].vQEAHLTEDQIFYFPk.[Y]          | N-Term(iTRAQ4plex); K16(iTRAQ4plex) | 1 | 1 |
| [R].fLQEQGHR.[A]                  | N-Term(iTRAQ4plex)                  | 1 | 1 |
| [R].aEATTLHVAPQGTAMAVSTFR.[K]     | N-Term(iTRAQ4plex)                  | 1 | 1 |
| [K].vGAHAGEYGAEALER.[M]           | N-Term(iTRAQ4plex)                  | 1 | 1 |
| [M].vLSPADkTNVk.[A]               | N-Term(iTRAQ4plex); K7(iTRAQ4plex)  | 1 | 1 |
| [K].tyFPHFDLSHGSAQVk.[G]          | N-Term(iTRAQ4plex); K16(iTRAQ4plex) | 1 | 1 |
| [K].TYFPHFDLSHGSAQVk.[G]          | K16(iTRAQ4plex)                     | 1 | 1 |
| [K].vGAHAGEYGAEALER.[M]           | N-Term(iTRAQ4plex)                  | 1 | 1 |
| [K].vGAHAGEYGAEALER.[M]           | N-Term(iTRAQ4plex)                  | 1 | 1 |
| [K].vADALTNAVAHVDDMPNALSALSDDLHAH | N-Term(iTRAQ4plex); K29(iTRAQ4plex) | 1 | 1 |
| [R].mFLSFPTTk.[T]                 | N-Term(iTRAQ4plex); K9(iTRAQ4plex)  | 1 | 1 |
| [K].vGAHAGEYGAEALER.[M]           | N-Term(iTRAQ4plex)                  | 1 | 1 |
| [R].vDPVNFk.[L]                   | N-Term(iTRAQ4plex); K7(iTRAQ4plex)  | 1 | 2 |
| [R].vDPVNFk.[L]                   | N-Term(iTRAQ4plex); K7(iTRAQ4plex)  | 1 | 2 |
| [R].MFLSFPTTk.[T]                 | K9(iTRAQ4plex)                      | 1 | 1 |
| [R].mFLSFPTTk.[T]                 | N-Term(iTRAQ4plex); M1(Oxidation)   | 1 | 1 |
| [K].fLASVSTVLTsk.[Y]              | N-Term(iTRAQ4plex); K12(iTRAQ4plex) | 1 | 1 |
| [K].fLASVSTVLTsk.[Y]              | N-Term(iTRAQ4plex); K12(iTRAQ4plex) | 1 | 1 |
| [R].vDPVNFk.[L]                   | K7(iTRAQ4plex)                      | 1 | 2 |
| [K].tyFPHFDLSHGSAQVk.[G]          | N-Term(iTRAQ4plex); K16(iTRAQ4plex) | 1 | 1 |
| [R].eWFSETFQk.[V]                 | N-Term(iTRAQ4plex); K9(iTRAQ4plex)  | 1 | 1 |
| [R].eWFSETFQk.[V]                 | N-Term(iTRAQ4plex); K9(iTRAQ4plex)  | 1 | 1 |
| [R].eWFSETFQk.[V]                 | N-Term(iTRAQ4plex); K9(iTRAQ4plex)  | 1 | 1 |
| [R].EWFSETFQk.[V]                 | K9(iTRAQ4plex)                      | 1 | 1 |
| [R].ikQSELSAk.[M]                 | N-Term(iTRAQ4plex); K2(iTRAQ4plex)  | 1 | 1 |
| [K].eFGNTLEDk.[A]                 | N-Term(iTRAQ4plex); K9(iTRAQ4plex)  | 1 | 1 |
| [K].eFGNTLEDk.[A]                 | N-Term(iTRAQ4plex); K9(iTRAQ4plex)  | 1 | 1 |
| [K].eFGNTLEDk.[A]                 | N-Term(iTRAQ4plex); K9(iTRAQ4plex)  | 1 | 1 |
| [K].eFGNTLEDk.[A]                 | N-Term(iTRAQ4plex); K9(iTRAQ4plex)  | 1 | 1 |
| [K].IkeFGNTLEDk.[A]               | N-Term(iTRAQ4plex); K2(iTRAQ4plex)  | 1 | 1 |
| [K].IkeFGNTLEDk.[A]               | N-Term(iTRAQ4plex); K2(iTRAQ4plex)  | 1 | 1 |
| [R].IkQSELSAk.[M]                 | K2(iTRAQ4plex)                      | 1 | 1 |
| [R].ikQSELSAk.[M]                 | N-Term(iTRAQ4plex); K2(iTRAQ4plex)  | 1 | 1 |
| [R].eWFSETFQk.[V]                 | N-Term(iTRAQ4plex); K9(iTRAQ4plex)  | 1 | 1 |
| [R].eWFSETFQk.[V]                 | N-Term(iTRAQ4plex); K9(iTRAQ4plex)  | 1 | 1 |
| [K].eFGNTLEDk.[A]                 | N-Term(iTRAQ4plex); K9(iTRAQ4plex)  | 1 | 1 |
| [K].qSELSAk.[M]                   | N-Term(iTRAQ4plex); K7(iTRAQ4plex)  | 1 | 1 |
| [R].IkQSELSAkMR.[E]               | K2(iTRAQ4plex); K9(iTRAQ4plex)      | 1 | 1 |

|                              |                                |   |   |
|------------------------------|--------------------------------|---|---|
| [R].eWFSETFQk.[V]            | N-Term(iTRAQ4plex); K9(iTRAQ4  | 1 | 1 |
| [K].EFGNTLEDk.[A]            | K9(iTRAQ4plex)                 | 1 | 1 |
| [K].mREWSETFQk.[V]           | N-Term(iTRAQ4plex); K11(iTRAQ  | 1 | 1 |
| [K].qSELSAk.[M]              | N-Term(iTRAQ4plex); K7(iTRAQ4  | 1 | 1 |
| [R].eWFSETFQk.[V]            | N-Term(iTRAQ4plex); K9(iTRAQ4  | 1 | 1 |
| [R].eWFSETFQk.[V]            | N-Term(iTRAQ4plex); K9(iTRAQ4  | 1 | 1 |
| [K].eFGNTLEDk.[A]            | N-Term(iTRAQ4plex); K9(iTRAQ4  | 1 | 1 |
| [R].iKQSELSAkMR.[E]          | N-Term(iTRAQ4plex); K9(iTRAQ4  | 1 | 1 |
| [K].qSELSAk.[M]              | N-Term(iTRAQ4plex); K7(iTRAQ4  | 1 | 1 |
| [R].EWFSETFQk.[V]            | K9(iTRAQ4plex)                 | 1 | 1 |
| [K].eTYDFDI AVL R.[L]        | N-Term(iTRAQ4plex)             | 1 | 1 |
| [K].acIPTGPYPcGk.[Q]         | N-Term(iTRAQ4plex); C2(Carbam  | 1 | 1 |
| [R].mNVAPAcLPER.[D]          | N-Term(iTRAQ4plex); C7(Carbam  | 1 | 1 |
| [R].mNVAPAcLPER.[D]          | N-Term(iTRAQ4plex); C7(Carbam  | 1 | 1 |
| [K].dTYFVTGIVSWGEGcAR.[K]    | N-Term(iTRAQ4plex); C15(Carbar | 1 | 1 |
| [K].dTYFVTGIVSWGEGcAR.[K]    | N-Term(iTRAQ4plex); C15(Carbar | 1 | 1 |
| [R].iVGGQeck.[D]             | N-Term(iTRAQ4plex); C7(Carbam  | 1 | 1 |
| [K].eTYDFDI AVL R.[L]        | N-Term(iTRAQ4plex)             | 1 | 1 |
| [K].mLEVPYVDR.[N]            | N-Term(iTRAQ4plex)             | 1 | 1 |
| [K].mLEVPYVDR.[N]            | N-Term(iTRAQ4plex)             | 1 | 1 |
| [K].tGIVSGFGR.[T]            | N-Term(iTRAQ4plex)             | 1 | 1 |
| [R].iVGGQeck.[D]             | C7(Carbamidomethyl); K8(iTRAC  | 1 | 1 |
| [K].TGIVSGFGR.[T]            |                                | 1 | 1 |
| [K].mLEVPYVDR.[N]            | N-Term(iTRAQ4plex)             | 1 | 1 |
| [K].acIPTGPYPcGk.[Q]         | N-Term(iTRAQ4plex); C2(Carbam  | 1 | 1 |
| [K].svVLIPLGAVDDGEHSQNEk.[I] | N-Term(iTRAQ4plex); K20(iTRAQ  | 1 | 1 |
| [R].gDGWLTDYPVLTevDgk.[L]    | N-Term(iTRAQ4plex); K17(iTRAQ  | 1 | 1 |
| [R].aLEQDLpVNIk.[F]          | N-Term(iTRAQ4plex); K11(iTRAQ  | 1 | 1 |
| [R].aLEQDLpVNIk.[F]          | N-Term(iTRAQ4plex); K11(iTRAQ  | 1 | 1 |
| [K].eEILMHLWR.[Y]            | N-Term(iTRAQ4plex)             | 1 | 1 |
| [R].mMAVAADTLQR.[L]          | N-Term(iTRAQ4plex)             | 1 | 1 |
| [R].kPAITYGTR.[G]            | N-Term(iTRAQ4plex); K1(iTRAQ4  | 1 | 1 |
| [R].aLEQDLpVNIk.[F]          | N-Term(iTRAQ4plex); K11(iTRAQ  | 1 | 1 |
| [K].svVLIPLGAVDDGEHSQNEk.[I] | N-Term(iTRAQ4plex); K20(iTRAQ  | 1 | 1 |
| [K].mFQEIvHk.[S]             | N-Term(iTRAQ4plex); K8(iTRAQ4  | 1 | 1 |
| [K].eEILMHLWR.[Y]            | N-Term(iTRAQ4plex)             | 1 | 1 |
| [R].aLAQcAPPPAVcAELVR.[E]    | N-Term(iTRAQ4plex); C5(Carbam  | 1 | 1 |
| [K].yGQPLPGYTTk.[G]          | N-Term(iTRAQ4plex); K11(iTRAQ  | 1 | 1 |
| [K].rETEYGPcR.[R]            | N-Term(iTRAQ4plex); C8(Carbam  | 1 | 1 |
| [K].fLNVLSPR.[G]             | N-Term(iTRAQ4plex)             | 1 | 1 |
| [R].aLAQcAPPPAVcAELVR.[E]    | N-Term(iTRAQ4plex); C5(Carbam  | 1 | 1 |
| [R].gVHIPNcDk.[K]            | N-Term(iTRAQ4plex); C7(Carbam  | 1 | 1 |
| [R].aLAQcAPPPAVcAELVR.[E]    | N-Term(iTRAQ4plex); C5(Carbam  | 1 | 1 |
| [K].fhPLHsk.[I]              | N-Term(iTRAQ4plex); K7(iTRAQ4  | 1 | 1 |
| [R].aLAQcAPPPAVcAELVR.[E]    | N-Term(iTRAQ4plex); C5(Carbam  | 1 | 1 |
| [K].vDYESQSTDTQNFSSesk.[R]   | N-Term(iTRAQ4plex); K18(iTRAQ  | 1 | 1 |
| [K].fhPLHsk.[I]              | N-Term(iTRAQ4plex); K7(iTRAQ4  | 1 | 1 |
| [K].iDPLEVEEGDPIVLPcNPPk.[G] | N-Term(iTRAQ4plex); C16(Carbar | 1 | 1 |
| [K].IHMLELHcEsk.[C]          | N-Term(iTRAQ4plex); C8(Carbam  | 1 | 1 |
| [K].veEVkPLEGR.[R]           | N-Term(iTRAQ4plex); K5(iTRAQ4  | 1 | 1 |
| [K].dGNPFYFTDHR.[I]          | N-Term(iTRAQ4plex)             | 1 | 1 |
| [K].gNPEPTFSWtk.[D]          | N-Term(iTRAQ4plex); K11(iTRAQ  | 1 | 1 |

|                                 |                                |   |   |
|---------------------------------|--------------------------------|---|---|
| [R].vMTPAVYAPYDVk.[V]           | N-Term(iTRAQ4plex); K13(iTRAQ4 | 1 | 1 |
| [K].gDLYFANVEEk.[D]             | N-Term(iTRAQ4plex); K11(iTRAQ4 | 1 | 1 |
| [K].skEQLTPLIk.[K]              | N-Term(iTRAQ4plex); K2(iTRAQ4  | 1 | 1 |
| [K].skEQLTPLIk.[K]              | N-Term(iTRAQ4plex); K2(iTRAQ4  | 1 | 1 |
| [K].skEQLTPLIk.[K]              | N-Term(iTRAQ4plex); K2(iTRAQ4  | 1 | 1 |
| [K].skEQLTPLIk.[K]              | N-Term(iTRAQ4plex); K2(iTRAQ4  | 1 | 1 |
| [K].EPcVESLVSQYFQTVTDYGk.[D]    | C3(Carbamidomethyl); K20(iTRA  | 1 | 1 |
| [K].EPcVESLVSQYFQTVTDYGk.[D]    | C3(Carbamidomethyl); K20(iTRA  | 1 | 1 |
| [K].ePcVESLVSQYFQTVTDYGk.[D]    | N-Term(iTRAQ4plex); C3(Carbam  | 1 | 1 |
| [K].vkSPELQAEAk.[S]             | N-Term(iTRAQ4plex); K2(iTRAQ4  | 1 | 1 |
| [K].vkSPELQAEAk.[S]             | N-Term(iTRAQ4plex); K2(iTRAQ4  | 1 | 1 |
| [K].kAGTELVNFLSYFVELGTQPATQ.[-] | N-Term(iTRAQ4plex); K1(iTRAQ4  | 1 | 1 |
| [K].sPELQAEAk.[S]               | N-Term(iTRAQ4plex); K9(iTRAQ4  | 1 | 1 |
| [K].sPELQAEAk.[S]               | N-Term(iTRAQ4plex); K9(iTRAQ4  | 1 | 1 |
| [K].sPELQAEAk.[S]               | N-Term(iTRAQ4plex); K9(iTRAQ4  | 1 | 1 |
| [K].sPELQAEAk.[S]               | N-Term(iTRAQ4plex); K9(iTRAQ4  | 1 | 1 |
| [K].sPELQAEAk.[S]               | N-Term(iTRAQ4plex); K9(iTRAQ4  | 1 | 1 |
| [K].sPELQAEAk.[S]               | N-Term(iTRAQ4plex); K9(iTRAQ4  | 1 | 1 |
| [K].sPELQAEAk.[S]               | N-Term(iTRAQ4plex); K9(iTRAQ4  | 1 | 1 |
| [K].sPELQAEAk.[S]               | N-Term(iTRAQ4plex); K9(iTRAQ4  | 1 | 1 |
| [K].sPELQAEAk.[S]               | N-Term(iTRAQ4plex); K9(iTRAQ4  | 1 | 1 |
| [K].aGTELVNFLSYFVELGTQPATQ.[-]  | N-Term(iTRAQ4plex)             | 1 | 1 |
| [K].ePcVESLVSQYFQTVTDYGk.[D]    | N-Term(iTRAQ4plex); C3(Carbam  | 1 | 1 |
| [K].SPELQAEAk.[S]               | K9(iTRAQ4plex)                 | 1 | 1 |
| [K].VkSPELQAEAk.[S]             | K2(iTRAQ4plex); K11(iTRAQ4ple  | 1 | 1 |
| [K].SPELQAEAk.[S]               | K9(iTRAQ4plex)                 | 1 | 1 |
| [K].sPELQAEAk.[S]               | N-Term(iTRAQ4plex); K9(iTRAQ4  | 1 | 1 |
| [K].sPELQAEAk.[S]               | N-Term(iTRAQ4plex); K9(iTRAQ4  | 1 | 1 |
| [K].eQLTPLIk.[K]                | N-Term(iTRAQ4plex); K8(iTRAQ4  | 1 | 1 |
| [K].sPELQAEAk.[S]               | N-Term(iTRAQ4plex); K9(iTRAQ4  | 1 | 1 |
| [K].sPELQAEAk.[S]               | N-Term(iTRAQ4plex); K9(iTRAQ4  | 1 | 1 |
| [K].skEQLTPLIk.[K]              | N-Term(iTRAQ4plex); K2(iTRAQ4  | 1 | 1 |
| [K].skEQLTPLIk.[K]              | N-Term(iTRAQ4plex); K2(iTRAQ4  | 1 | 1 |
| [K].sPELQAEAk.[S]               | N-Term(iTRAQ4plex); K9(iTRAQ4  | 1 | 1 |
| [K].skEQLTPLIk.[K]              | N-Term(iTRAQ4plex); K2(iTRAQ4  | 1 | 1 |
| [K].eQLTPLIk.[K]                | N-Term(iTRAQ4plex); K8(iTRAQ4  | 1 | 1 |
| [K].eQLTPLIk.[K]                | N-Term(iTRAQ4plex); K8(iTRAQ4  | 1 | 1 |
| [K].ePcVESLVSQYFQTVTDYGk.[D]    | N-Term(iTRAQ4plex); C3(Carbam  | 1 | 1 |
| [K].skEQLTPLIk.[K]              | K2(iTRAQ4plex); K10(iTRAQ4ple  | 1 | 1 |
| [K].skEQLTPLIk.[K]              | N-Term(iTRAQ4plex); K2(iTRAQ4  | 1 | 1 |
| [K].skEQLTPLIk.[K]              | N-Term(iTRAQ4plex); K10(iTRAQ  | 1 | 1 |
| [K].sPELQAEAk.[S]               | N-Term(iTRAQ4plex); K9(iTRAQ4  | 1 | 1 |
| [K].eQLTPLIk.[K]                | N-Term(iTRAQ4plex); K8(iTRAQ4  | 1 | 1 |
| [K].sPELQAEAk.[S]               | N-Term(iTRAQ4plex); K9(iTRAQ4  | 1 | 1 |
| [K].skEQLTPLIk.[K]              | N-Term(iTRAQ4plex); K2(iTRAQ4  | 1 | 1 |
| [K].eQLTPLIk.[K]                | N-Term(iTRAQ4plex)             | 1 | 1 |
| [K].aGTELVNFLSYFVELGTQPATQ.[-]  | N-Term(iTRAQ4plex)             | 1 | 1 |
| [K].skEQLTPLIk.[A]              | N-Term(iTRAQ4plex); K2(iTRAQ4  | 1 | 1 |
| [K].eQLTPLIk.[K]                | N-Term(iTRAQ4plex); K8(iTRAQ4  | 1 | 1 |
| [K].sPELQAEAk.[S]               | N-Term(iTRAQ4plex); K9(iTRAQ4  | 1 | 1 |
| [K].skEQLTPLIk.[K]              | N-Term(iTRAQ4plex); K2(iTRAQ4  | 1 | 1 |
| [K].eQLTPLIk.[K]                | N-Term(iTRAQ4plex); K8(iTRAQ4  | 1 | 1 |

|                                  |                               |   |   |
|----------------------------------|-------------------------------|---|---|
| [K].vkSPELQAEAk.[S]              | N-Term(iTRAQ4plex); K2(iTRAQ4 | 1 | 1 |
| [K].sPELQAEAk.[S]                | N-Term(iTRAQ4plex); K9(iTRAQ4 | 1 | 1 |
| [K].skEQLTPLIk.[K]               | N-Term(iTRAQ4plex); K2(iTRAQ4 | 1 | 1 |
| [K].skEQLTPLIk.[K]               | N-Term(iTRAQ4plex); K2(iTRAQ4 | 1 | 1 |
| [K].sPELQAEAk.[S]                | N-Term(iTRAQ4plex); K9(iTRAQ4 | 1 | 1 |
| [K].skEQLTPLIk.[K]               | N-Term(iTRAQ4plex); K2(iTRAQ4 | 1 | 1 |
| [K].sPELQAEAk.[S]                | N-Term(iTRAQ4plex); K9(iTRAQ4 | 1 | 1 |
| [K].eQLTPLIk.[K]                 | N-Term(iTRAQ4plex); K8(iTRAQ4 | 1 | 1 |
| [K].VksPELQAEAk.[S]              | K2(iTRAQ4plex); K11(iTRAQ4ple | 1 | 1 |
| [K].vKSPELQAEAk.[S]              | N-Term(iTRAQ4plex); K11(iTRAQ | 1 | 1 |
| [K].sPELQAEAk.[S]                | N-Term(iTRAQ4plex); K9(iTRAQ4 | 1 | 1 |
| [K].EQLTPLIk.[K]                 | K8(iTRAQ4plex)                | 1 | 1 |
| [K].sPELQAEAk.[S]                | N-Term(iTRAQ4plex); K9(iTRAQ4 | 1 | 1 |
| [K].yGIDWASGR.[G]                | N-Term(iTRAQ4plex)            | 1 | 1 |
| [R].tFAHYATFR.[L]                | N-Term(iTRAQ4plex)            | 1 | 1 |
| [R].tFAHYATFR.[L]                | N-Term(iTRAQ4plex)            | 1 | 1 |
| [R].ILGEVDHYQLALGk.[F]           | N-Term(iTRAQ4plex); K14(iTRAQ | 1 | 1 |
| [R].yAVSEAAAHk.[Y]               | N-Term(iTRAQ4plex); K10(iTRAQ | 1 | 1 |
| [R].aGFGNQESEFWLGNENLHQLTLQGNWEL | N-Term(iTRAQ4plex)            | 1 | 1 |
| [R].aGFGNQESEFWLGNENLHQLTLQGNWEL | N-Term(iTRAQ4plex)            | 1 | 1 |
| [R].yAVSEAAAHk.[Y]               | N-Term(iTRAQ4plex); K10(iTRAQ | 1 | 1 |
| [R].aLPVFcDMDTEGGGWLVFQR.[R]     | N-Term(iTRAQ4plex); C6(Carbam | 1 | 1 |
| [R].qDGSVDFFR.[S]                | N-Term(iTRAQ4plex)            | 1 | 1 |
| [K].vLLPScPGAPGSPGEk.[G]         | N-Term(iTRAQ4plex); C7(Carbam | 1 | 1 |
| [R].tFAHYATFR.[L]                | N-Term(iTRAQ4plex)            | 1 | 1 |
| [R].tFAHYATFR.[L]                | N-Term(iTRAQ4plex)            | 1 | 1 |
| [K].YGIDWASGR.[G]                |                               | 1 | 1 |
| [R].ILGEVDHYQLALGk.[F]           | N-Term(iTRAQ4plex); K14(iTRAQ | 1 | 1 |
| [K].vLLPScPGAPGSPGEk.[G]         | N-Term(iTRAQ4plex); C7(Carbam | 1 | 1 |
| [R].tFAHYATFR.[L]                | N-Term(iTRAQ4plex)            | 1 | 1 |
| [K].SHLIIAQVak.[N]               | K10(iTRAQ4plex)               | 1 | 1 |
| [K].shLIIAQVak.[N]               | N-Term(iTRAQ4plex); K10(iTRAQ | 1 | 1 |
| [K].shLIIAQVak.[N]               | N-Term(iTRAQ4plex); K10(iTRAQ | 1 | 1 |
| [R].wNPcLEPHR.[F]                | N-Term(iTRAQ4plex); C4(Carbam | 1 | 1 |
| [R].qEALMNMNQLDIYEQQVMTAAQk.[D]  | N-Term(iTRAQ4plex); K24(iTRAQ | 1 | 1 |
| [K].shLIIAQVak.[N]               | N-Term(iTRAQ4plex); K10(iTRAQ | 1 | 1 |
| [K].shLIIAQVak.[N]               | N-Term(iTRAQ4plex); K10(iTRAQ | 1 | 1 |
| [K].iLSGDPYcEk.[D]               | N-Term(iTRAQ4plex); C8(Carbam | 1 | 1 |
| [K].dAQEVHcDEATk.[W]             | N-Term(iTRAQ4plex); C7(Carbam | 1 | 1 |
| [K].dAQEVHcDEATk.[W]             | N-Term(iTRAQ4plex); C7(Carbam | 1 | 1 |
| [R].gDMFLVANLGtk.[E]             | N-Term(iTRAQ4plex); K12(iTRAQ | 1 | 1 |
| [K].vDLITFDTPFAGR.[F]            | N-Term(iTRAQ4plex)            | 1 | 1 |
| [K].SHLIIAQVak.[N]               | K10(iTRAQ4plex)               | 1 | 1 |
| [R].ISSGLVTAALYGR.[L]            | N-Term(iTRAQ4plex)            | 1 | 1 |
| [K].vDLITFDTPFAGR.[F]            | N-Term(iTRAQ4plex)            | 1 | 1 |
| [R].gDMFLVANLGtk.[E]             | N-Term(iTRAQ4plex); K12(iTRAQ | 1 | 1 |
| [R].tWDPEGVIFYGDTNPK.[D]         | N-Term(iTRAQ4plex); K16(iTRAQ | 1 | 1 |
| [R].tWDPEGVIFYGDTNPK.[D]         | N-Term(iTRAQ4plex); K16(iTRAQ | 1 | 1 |
| [R].vVLSQGSk.[M]                 | N-Term(iTRAQ4plex); K8(iTRAQ4 | 1 | 1 |
| [R].iALGGLLFPASNLR.[L]           | N-Term(iTRAQ4plex)            | 1 | 1 |
| [K].qAEISASAPSLR.[S]             | N-Term(iTRAQ4plex)            | 1 | 1 |
| [K].vVLSGSGPGLDLPLVLGLPLQLk.[L]  | N-Term(iTRAQ4plex); K24(iTRAQ | 1 | 1 |

|                                      |                                |   |   |
|--------------------------------------|--------------------------------|---|---|
| [R].dGRPEIQLHNHWAQLTVGAGPR.[L]       | N-Term(iTRAQ4plex)             | 1 | 1 |
| [R].dGRPEIQLHNHWAQLTVGAGPR.[L]       | N-Term(iTRAQ4plex)             | 1 | 1 |
| [R].wHQVEVvk.[M]                     | N-Term(iTRAQ4plex); K7(iTRAQ4  | 1 | 1 |
| [K].dDWFMLGLR.[D]                    | N-Term(iTRAQ4plex)             | 1 | 1 |
| [R].vVLSQGSk.[M]                     | N-Term(iTRAQ4plex); K8(iTRAQ4  | 1 | 1 |
| [R].kWYHLTEGSTDLR.[T]                | N-Term(iTRAQ4plex); K1(iTRAQ4  | 1 | 1 |
| [K].wIYHLTEGSTDLR.[T]                | N-Term(iTRAQ4plex)             | 1 | 1 |
| [K].wIYHLTEGSTDLR.[T]                | N-Term(iTRAQ4plex)             | 1 | 1 |
| [K].wIYHLTEGSTDLR.[T]                | N-Term(iTRAQ4plex)             | 1 | 1 |
| [K].wIYHLTEGSTDLR.[T]                | N-Term(iTRAQ4plex)             | 1 | 1 |
| [K].eFPEVHLGQWYFIAGAAPTk.[E]         | N-Term(iTRAQ4plex); K20(iTRAQ  | 1 | 1 |
| [K].eELATFDPVDNIVFNMAAGSAPMQLHLR.    | N-Term(iTRAQ4plex)             | 1 | 1 |
| [K].sLTScLDSk.[A]                    | N-Term(iTRAQ4plex); C5(Carbam  | 1 | 1 |
| [K].wIYHLTEGSTDLR.[T]                | N-Term(iTRAQ4plex)             | 1 | 1 |
| [K].sLTScLDSk.[A]                    | N-Term(iTRAQ4plex); C5(Carbam  | 1 | 1 |
| [R].nQEAcELSNN.[-]                   | N-Term(iTRAQ4plex); C5(Carbam  | 1 | 1 |
| [K].eFPEVHLGQWYFIAGAAPTk.[E]         | N-Term(iTRAQ4plex); K20(iTRAQ  | 1 | 1 |
| [R].tEGRPDMk.[T]                     | N-Term(iTRAQ4plex); K8(iTRAQ4  | 1 | 1 |
| [R].tEGRPDMk.[T]                     | N-Term(iTRAQ4plex); K8(iTRAQ4  | 1 | 1 |
| [R].nQEAcELSNN.[-]                   | N-Term(iTRAQ4plex); C5(Carbam  | 1 | 1 |
| [K].AFLTPR.[N]                       |                                | 1 | 1 |
| [K].sLTScLDSk.[A]                    | C5(Carbamidomethyl); K9(iTRAC  | 1 | 1 |
| [R].eFTRPEEIIFLR.[A]                 | N-Term(iTRAQ4plex)             | 1 | 1 |
| [R].gYHLNEEGTR.[C]                   | N-Term(iTRAQ4plex)             | 1 | 1 |
| [K].sQETGDLDVGGGLQETDk.[I]           | N-Term(iTRAQ4plex); K17(iTRAQ  | 1 | 1 |
| [R].dSScGTGYELTEDNSck.[D]            | N-Term(iTRAQ4plex); C4(Carbam  | 1 | 1 |
| [R].dSScGTGYELTEDNSck.[D]            | N-Term(iTRAQ4plex); C4(Carbam  | 1 | 1 |
| [R].gYHLNEEGTR.[C]                   | N-Term(iTRAQ4plex)             | 1 | 1 |
| [R].mcVDVNEcQR.[Y]                   | N-Term(iTRAQ4plex); C2(Carbam  | 1 | 1 |
| [R].mVQEQccHSQLEELHcATGISLANEQDR.[C] | N-Term(iTRAQ4plex); C6(Carbam  | 1 | 1 |
| [R].ccHccLLGR.[A]                    | N-Term(iTRAQ4plex); C1(Carbam  | 1 | 1 |
| [R].sAATLQQEk.[T]                    | N-Term(iTRAQ4plex); K9(iTRAQ4  | 1 | 1 |
| [R].dSScGTGYELTEDNSck.[D]            | N-Term(iTRAQ4plex); C4(Carbam  | 1 | 1 |
| [R].sAATLQQEk.[T]                    | N-Term(iTRAQ4plex); K9(iTRAQ4  | 1 | 1 |
| [R].sIPQVSPVR.[R]                    | N-Term(iTRAQ4plex)             | 1 | 1 |
| [R].iVQLIQDTR.[I]                    | N-Term(iTRAQ4plex)             | 1 | 1 |
| [K].yGGPNHHLPLPDNWk.[S]              | N-Term(iTRAQ4plex); K15(iTRAQ  | 1 | 1 |
| [K].yVGNmHGNEALGR.[E]                | N-Term(iTRAQ4plex); M5(Oxidat  | 1 | 1 |
| [R].iVQLIQDTR.[I]                    | N-Term(iTRAQ4plex)             | 1 | 1 |
| [K].yGGPNHHLPLPDNWk.[S]              | N-Term(iTRAQ4plex); K15(iTRAQ  | 1 | 1 |
| [K].vQNEcPGITR.[V]                   | N-Term(iTRAQ4plex); C5(Carbam  | 1 | 1 |
| [R].tASTPTPDDk.[L]                   | N-Term(iTRAQ4plex); K10(iTRAQ  | 1 | 1 |
| [R].iVQLIQDTR.[I]                    |                                | 1 | 1 |
| [K].sQVEPETR.[A]                     | N-Term(iTRAQ4plex)             | 1 | 1 |
| [K].yGGPNHHLPLPDNWk.[S]              | N-Term(iTRAQ4plex); K15(iTRAQ  | 1 | 1 |
| [R].iHILPSMNPdGYEVAQAQGNkPGYLVGR     | N-Term(iTRAQ4plex); K22(iTRAQ  | 1 | 1 |
| [R].sIPQVSPVR.[R]                    | N-Term(iTRAQ4plex)             | 1 | 1 |
| [K].yGGPNHHLPLPDNWk.[S]              | N-Term(iTRAQ4plex); K15(iTRAQ  | 1 | 1 |
| [K].dNVEMDTFQIEclK.[D]               | N-Term(iTRAQ4plex); C12(Carbar | 1 | 1 |
| [R].aAGNEcPELQPPVHGk.[I]             | N-Term(iTRAQ4plex); C6(Carbam  | 1 | 1 |
| [R].aAGNEcPELQPPVHGk.[I]             | N-Term(iTRAQ4plex); C6(Carbam  | 1 | 1 |
| [R].aAGNEcPELQPPVHGk.[I]             | N-Term(iTRAQ4plex); C6(Carbam  | 1 | 1 |

|                              |                                |   |   |
|------------------------------|--------------------------------|---|---|
| [R].sDENEQHLGVk.[H]          | N-Term(iTRAQ4plex); K11(iTRAQ  | 1 | 1 |
| [RK].sDFSNEER.[F]            | N-Term(iTRAQ4plex)             | 2 | 2 |
| [K].vLGPFCgEk.[A]            | N-Term(iTRAQ4plex); C6(Carbam  | 1 | 1 |
| [R].dSDLLSPSDFk.[I]          | N-Term(iTRAQ4plex); K11(iTRAQ  | 1 | 1 |
| [R].dMIcAGEk.[E]             | N-Term(iTRAQ4plex); C4(Carbam  | 1 | 1 |
| [K].yScQEYYk.[M]             | N-Term(iTRAQ4plex); C3(Carbam  | 1 | 1 |
| [R].sDENEQHLGVk.[H]          | N-Term(iTRAQ4plex); K11(iTRAQ  | 1 | 1 |
| [R].sLPTcLPVcGLPk.[F]        | N-Term(iTRAQ4plex); C5(Carbam  | 1 | 1 |
| [R].hVLAAWALGAK.[A]          | N-Term(iTRAQ4plex); K11(iTRAQ  | 1 | 1 |
| [R].sPAGPTVVSIGGGk.[G]       | N-Term(iTRAQ4plex); K14(iTRAQ  | 1 | 1 |
| [K].sAVDAGFLQk.[Y]           | N-Term(iTRAQ4plex); K10(iTRAQ  | 1 | 1 |
| [K].gQIHLDPQQDYQLLQVQR.[T]   | N-Term(iTRAQ4plex)             | 1 | 1 |
| [K].vISTLEPTPQcPTSQGR.[S]    | N-Term(iTRAQ4plex); C12(Carbar | 1 | 1 |
| [R].kVVTVLVR.[D]             | N-Term(iTRAQ4plex); K1(iTRAQ4  | 1 | 1 |
| [R].sPAGPTVVSIGGGk.[G]       | N-Term(iTRAQ4plex); K14(iTRAQ  | 1 | 1 |
| [R].eTAFILTYcTDk.[C]         | N-Term(iTRAQ4plex); C10(Carbar | 1 | 1 |
| [R].IEVHYHNPLVIEGR.[N]       | N-Term(iTRAQ4plex)             | 1 | 1 |
| [K].gRPGPQPWcATTPNFDQDQR.[W] | N-Term(iTRAQ4plex); C9(Carbam  | 1 | 1 |
| [R].tTLGAPcQPWASEATYR.[N]    | N-Term(iTRAQ4plex); C8(Carbam  | 1 | 1 |
| [R].nWGLGGHAFcR.[N]          | N-Term(iTRAQ4plex); C10(Carbar | 1 | 1 |
| [R].IHEAFSPVSYQHDLALLR.[L]   | N-Term(iTRAQ4plex)             | 1 | 1 |
| [R].tNPcLHGGR.[C]            | N-Term(iTRAQ4plex); C4(Carbam  | 1 | 1 |
| [R].nWGLGGHAFcR.[N]          | N-Term(iTRAQ4plex); C10(Carbar | 1 | 1 |
| [R].cLEVEGHR.[L]             | N-Term(iTRAQ4plex); C1(Carbam  | 1 | 1 |
| [R].vVGGVALR.[G]             | N-Term(iTRAQ4plex)             | 1 | 1 |
| [R].eQPPSLTR.[N]             | N-Term(iTRAQ4plex)             | 1 | 1 |
| [K].IicQATGFSPR.[Q]          | N-Term(iTRAQ4plex); C3(Carbam  | 1 | 2 |
| [K].IicQATGFSPR.[Q]          | N-Term(iTRAQ4plex); C3(Carbam  | 1 | 2 |
| [K].gVALHRPDVYLLPPAR.[E]     | N-Term(iTRAQ4plex)             | 1 | 2 |
| [K].gVALHRPDVYLLPPAR.[E]     | N-Term(iTRAQ4plex)             | 1 | 2 |
| [K].gVALHRPDVYLLPPAR.[E]     | N-Term(iTRAQ4plex)             | 1 | 2 |
| [K].LIcQATGFSPR.[Q]          | C3(Carbamidomethyl)            | 1 | 2 |
| [R].fTcTVHTDLPsPLk.[Q]       | N-Term(iTRAQ4plex); C3(Carbam  | 1 | 2 |
| [R].fTcTVHTDLPsPLk.[Q]       | N-Term(iTRAQ4plex); C3(Carbam  | 1 | 2 |
| [R].vFAIPPSFASIFLTk.[S]      | N-Term(iTRAQ4plex); K15(iTRAQ  | 1 | 2 |
| [K].yVTSAPMPEPQAPGR.[Y]      | N-Term(iTRAQ4plex)             | 1 | 2 |
| [K].eSGPTYk.[V]              | N-Term(iTRAQ4plex); K8(iTRAQ4  | 1 | 2 |
| [K].vTSTLTik.[E]             | N-Term(iTRAQ4plex); K8(iTRAQ4  | 1 | 2 |
| [R].GQPLSPEk.[Y]             | K8(iTRAQ4plex)                 | 1 | 2 |
| [R].gQPLSPEk.[Y]             | N-Term(iTRAQ4plex); K8(iTRAQ4  | 1 | 2 |
| [K].eSGPTYk.[V]              | N-Term(iTRAQ4plex); K8(iTRAQ4  | 1 | 2 |
| [R].vFAIPPSFASIFLTk.[S]      | N-Term(iTRAQ4plex); K15(iTRAQ  | 1 | 2 |
| [K].VSVFVPPR.[D]             |                                | 1 | 2 |
| [K].yVTSAPMPEPQAPGR.[Y]      | N-Term(iTRAQ4plex)             | 1 | 2 |
| [K].vTSTLTik.[E]             | N-Term(iTRAQ4plex); K8(iTRAQ4  | 1 | 2 |
| [R].fTcTVHTDLPsPLk.[Q]       | N-Term(iTRAQ4plex); C3(Carbam  | 1 | 2 |
| [R].fTcTVHTDLPsPLk.[Q]       | N-Term(iTRAQ4plex); C3(Carbam  | 1 | 2 |
| [K].vSVFVPPR.[D]             | N-Term(iTRAQ4plex)             | 1 | 2 |
| [R].GQPLSPEk.[Y]             | K8(iTRAQ4plex)                 | 1 | 2 |
| [K].gVALHRPDVYLLPPAR.[E]     | N-Term(iTRAQ4plex)             | 1 | 2 |
| [R].fTcTVHTDLPsPLk.[Q]       | N-Term(iTRAQ4plex); C3(Carbam  | 1 | 2 |
| [R].gQPLSPEk.[Y]             | N-Term(iTRAQ4plex); K8(iTRAQ4  | 1 | 2 |



|                                  |                                |   |   |
|----------------------------------|--------------------------------|---|---|
| [K].vSVFVPPR.[D]                 | N-Term(iTRAQ4plex)             | 1 | 2 |
| [K].vTSTLTik.[E]                 | N-Term(iTRAQ4plex); K8(iTRAQ4  | 1 | 2 |
| [K].vTSTLTik.[E]                 | N-Term(iTRAQ4plex); K8(iTRAQ4  | 1 | 2 |
| [K].vSVFVPPR.[D]                 | N-Term(iTRAQ4plex)             | 1 | 2 |
| [R].gQPLSPEk.[Y]                 | N-Term(iTRAQ4plex); K8(iTRAQ4  | 1 | 2 |
| [K].vSVFVPPR.[D]                 | N-Term(iTRAQ4plex)             | 1 | 2 |
| [K].vSVFVPPR.[D]                 | N-Term(iTRAQ4plex)             | 1 | 2 |
| [K].iTfMcNDHYlK.[G]              | N-Term(iTRAQ4plex); C5(Carbam  | 1 | 1 |
| [R].yYLVGVQEQQcVDGEWSSALPVck.[L] | N-Term(iTRAQ4plex); C11(Carbar | 1 | 1 |
| [R].yYLVGVQEQQcVDGEWSSALPVck.[L] | N-Term(iTRAQ4plex); C11(Carbar | 1 | 1 |
| [R].sQcLEDHTWAPPFPick.[S]        | N-Term(iTRAQ4plex); C3(Carbam  | 1 | 1 |
| [K].eVEGQILGTYVck.[G]            | N-Term(iTRAQ4plex); C12(Carbar | 1 | 1 |
| [K].eVEGQILGTYVck.[G]            | N-Term(iTRAQ4plex); C12(Carbar | 1 | 1 |
| [K].IIQEAPkPEcEk.[A]             | N-Term(iTRAQ4plex); K7(iTRAQ4  | 1 | 1 |
| [K].IIQEAPkPEcEk.[A]             | N-Term(iTRAQ4plex); K7(iTRAQ4  | 1 | 1 |
| [K].IIQEAPkPEcEk.[A]             | N-Term(iTRAQ4plex); K7(iTRAQ4  | 1 | 1 |
| [K].nLcEAMENFMQQLk.[E]           | N-Term(iTRAQ4plex); C3(Carbam  | 1 | 1 |
| [K].aLLAFQESk.[N]                | N-Term(iTRAQ4plex); K9(iTRAQ4  | 1 | 1 |
| [K].aLLAFQESk.[N]                | N-Term(iTRAQ4plex); K9(iTRAQ4  | 1 | 1 |
| [K].iTfMcNDHYlK.[G]              | N-Term(iTRAQ4plex); M4(Oxidat  | 1 | 1 |
| [K].eSGMTMEELk.[Y]               | N-Term(iTRAQ4plex); K10(iTRAQ  | 1 | 1 |
| [K].gYHLVGk.[K]                  | N-Term(iTRAQ4plex); K7(iTRAQ4  | 1 | 1 |
| [R].sQcLEDHTWAPPFPick.[S]        | C3(Carbamidomethyl); C16(Carb  | 1 | 1 |
| [R].sQcLEDHTWAPPFPick.[S]        | N-Term(iTRAQ4plex); C3(Carbam  | 1 | 1 |
| [R].nPDADekPWcFik.[V]            | N-Term(iTRAQ4plex); K7(iTRAQ4  | 1 | 1 |
| [R].nPDADekPWcFik.[V]            | N-Term(iTRAQ4plex); K7(iTRAQ4  | 1 | 1 |
| [R].nPDADekPWcFik.[V]            | N-Term(iTRAQ4plex); K7(iTRAQ4  | 1 | 1 |
| [R].gQcLITQSPYYR.[C]             | N-Term(iTRAQ4plex); C3(Carbam  | 1 | 1 |
| [R].gQcLITQSPYYR.[C]             | N-Term(iTRAQ4plex); C3(Carbam  | 1 | 1 |
| [R].gQcLITQSPYYR.[C]             | N-Term(iTRAQ4plex); C3(Carbam  | 1 | 1 |
| [K].fTcAcPDQFk.[G]               | N-Term(iTRAQ4plex); C3(Carbam  | 1 | 1 |
| [K].fTcAcPDQFk.[G]               | N-Term(iTRAQ4plex); C3(Carbam  | 1 | 1 |
| [K].IPGFDSGk.[T]                 | N-Term(iTRAQ4plex); C7(Carbam  | 1 | 1 |
| [K].IPGFDSGk.[T]                 | N-Term(iTRAQ4plex); C7(Carbam  | 1 | 1 |
| [K].KEEFHEQSFR.[V]               | N-Term(iTRAQ4plex); K1(iTRAQ4  | 1 | 1 |
| [K].IkPVDGHcALESk.[Y]            | N-Term(iTRAQ4plex); K2(iTRAQ4  | 1 | 1 |
| [K].IkPVDGHcALESk.[Y]            | N-Term(iTRAQ4plex); K2(iTRAQ4  | 1 | 1 |
| [R].nPDADekPWcFik.[V]            | N-Term(iTRAQ4plex); K7(iTRAQ4  | 1 | 1 |
| [R].dEIPHNDIALlk.[L]             | N-Term(iTRAQ4plex); K12(iTRAQ  | 1 | 1 |
| [R].nPDADekPWcFik.[V]            | N-Term(iTRAQ4plex); K7(iTRAQ4  | 1 | 1 |
| [K].IPGFDSGk.[T]                 | N-Term(iTRAQ4plex); C7(Carbam  | 1 | 1 |
| [R].gQcLITQSPYYR.[C]             | N-Term(iTRAQ4plex); C3(Carbam  | 1 | 1 |
| [K].vVLGDQDLk.[K]                | N-Term(iTRAQ4plex); K9(iTRAQ4  | 1 | 1 |
| [K].LIANTLcNSR.[Q]               | C7(Carbamidomethyl)            | 1 | 1 |
| [R].gQcLITQSPYYR.[C]             | N-Term(iTRAQ4plex); C3(Carbam  | 1 | 1 |
| [K].KEEFHEQSFR.[V]               | N-Term(iTRAQ4plex); K1(iTRAQ4  | 1 | 1 |
| [K].KEEFHEQSFR.[V]               | N-Term(iTRAQ4plex); K1(iTRAQ4  | 1 | 1 |
| [K].IPGFDSGk.[T]                 | N-Term(iTRAQ4plex); C7(Carbam  | 1 | 1 |
| [R].nPDADekPWcFik.[V]            | N-Term(iTRAQ4plex); K7(iTRAQ4  | 1 | 1 |
| [R].aYSLFSYNTQGRDNELLVYKER.[V]   | N-Term(iTRAQ4plex); K20(iTRAQ  | 1 | 1 |
| [R].aYSLFSYNTQGR.[D]             | N-Term(iTRAQ4plex)             | 1 | 1 |
| [R].aYSLFSYNTQGR.[D]             | N-Term(iTRAQ4plex)             | 1 | 1 |

|                                    |                                |   |   |
|------------------------------------|--------------------------------|---|---|
| [R].aYSLFSYNTQGR.[D]               | N-Term(iTRAQ4plex)             | 1 | 1 |
| [R].dNELLVYKER.[V]                 | N-Term(iTRAQ4plex); K8(iTRAQ4  | 1 | 1 |
| [K].iVLGQEQDSYGGk.[F]              | N-Term(iTRAQ4plex); K13(iTRAQ  | 1 | 1 |
| [K].iVLGQEQDSYGGk.[F]              | N-Term(iTRAQ4plex); K13(iTRAQ  | 1 | 1 |
| [K].iVLGQEQDSYGGk.[F]              | N-Term(iTRAQ4plex); K13(iTRAQ  | 1 | 1 |
| [K].iVLGQEQDSYGGk.[F]              | N-Term(iTRAQ4plex); K13(iTRAQ  | 1 | 1 |
| [R].VGEYSLYIGR.[H]                 |                                | 1 | 1 |
| [R].GYVIIkPLVWV.[-]                | K6(iTRAQ4plex)                 | 1 | 1 |
| [R].aYSLFSYNTQGR.[D]               | N-Term(iTRAQ4plex)             | 1 | 1 |
| [K].iVLGQEQDSYGGk.[F]              | N-Term(iTRAQ4plex); K13(iTRAQ  | 1 | 1 |
| [R].dNELLVYk.[E]                   | N-Term(iTRAQ4plex); K8(iTRAQ4  | 1 | 1 |
| [R].gYVIIkPLVWV.[-]                | N-Term(iTRAQ4plex); K6(iTRAQ4  | 1 | 1 |
| [R].dNELLVYKER.[V]                 | N-Term(iTRAQ4plex); K8(iTRAQ4  | 1 | 1 |
| [R].QGYFVEAQPk.[I]                 | K10(iTRAQ4plex)                | 1 | 1 |
| [K].gLRQGYFVEAQPk.[I]              | N-Term(iTRAQ4plex); K13(iTRAQ  | 1 | 1 |
| [R].qGYFVEAQPk.[I]                 | N-Term(iTRAQ4plex); K10(iTRAQ  | 1 | 1 |
| [R].dNELLVYKER.[V]                 | N-Term(iTRAQ4plex); K8(iTRAQ4  | 1 | 1 |
| [R].dNELLVYk.[E]                   | N-Term(iTRAQ4plex); K8(iTRAQ4  | 1 | 1 |
| [R].dNELLVYKER.[V]                 | N-Term(iTRAQ4plex); K8(iTRAQ4  | 1 | 1 |
| [R].hcYSIQHcPLk.[G]                | N-Term(iTRAQ4plex); C2(Carbam  | 1 | 1 |
| [R].hcYSIQHcPLk.[G]                | N-Term(iTRAQ4plex); C2(Carbam  | 1 | 1 |
| [K].gLLGGGSVEDccLNTAFAYQk.[R]      | N-Term(iTRAQ4plex); C12(Carbar | 1 | 1 |
| [R].tcNHPVPQHGGPFcAGDATR.[T]       | N-Term(iTRAQ4plex); C2(Carbam  | 1 | 1 |
| [R].tcNHPVPQHGGPFcAGDATR.[T]       | N-Term(iTRAQ4plex); C2(Carbam  | 1 | 1 |
| [R].hcYSIQHcPLk.[G]                | N-Term(iTRAQ4plex); C2(Carbam  | 1 | 1 |
| [K].sIScQEIPGQQSR.[G]              | N-Term(iTRAQ4plex); C4(Carbam  | 1 | 1 |
| [K].yPPTVSMVEGQGEk.[N]             | N-Term(iTRAQ4plex); K14(iTRAQ  | 1 | 1 |
| [K].rPcLHVPAck.[D]                 | N-Term(iTRAQ4plex); C3(Carbam  | 1 | 1 |
| [K].rPcLHVPAck.[D]                 | N-Term(iTRAQ4plex); C3(Carbam  | 1 | 1 |
| [R].IcTPLLPk.[Y]                   | N-Term(iTRAQ4plex); C2(Carbam  | 1 | 1 |
| [K].rPcLHVPAck.[D]                 | N-Term(iTRAQ4plex); C3(Carbam  | 1 | 1 |
| [R].cEELQGQk.[L]                   | N-Term(iTRAQ4plex); C1(Carbam  | 1 | 1 |
| [R].acNHPAPk.[C]                   | N-Term(iTRAQ4plex); C2(Carbam  | 1 | 1 |
| [K].rPcLHVPAck.[D]                 | N-Term(iTRAQ4plex); C3(Carbam  | 1 | 1 |
| [R].IcTPLLPk.[Y]                   | N-Term(iTRAQ4plex); C2(Carbam  | 1 | 1 |
| [R].acNHPAPk.[C]                   | N-Term(iTRAQ4plex); C2(Carbam  | 1 | 1 |
| [K].gNDDHWIVDtdYDYAVQYScR.[L]      | N-Term(iTRAQ4plex); C21(Carbar | 1 | 1 |
| [K].gNDDHWIVDtdYDYAVQYScR.[L]      | N-Term(iTRAQ4plex); C21(Carbar | 1 | 1 |
| [K].gNDDHWIVDtdYDYAVQYScR.[L]      | N-Term(iTRAQ4plex); C21(Carbar | 1 | 1 |
| [R].IIVHNGYcDGR.[S]                | N-Term(iTRAQ4plex); C8(Carbam  | 1 | 1 |
| [R].ILNNWDVcADMVGTFTDTEdPAk.[F]    | N-Term(iTRAQ4plex); C8(Carbam  | 1 | 1 |
| [K].kDPEGLFLQDNIVAefSVdETGQMSATAk. | N-Term(iTRAQ4plex); K1(iTRAQ4  | 1 | 1 |
| [K].kDPEGLFLQDNIVAefSVdETGQMSATAk. | N-Term(iTRAQ4plex); K1(iTRAQ4  | 1 | 1 |
| [K].kDPEGLFLQDNIVAefSVdETGQMSATAk. | N-Term(iTRAQ4plex); K1(iTRAQ4  | 1 | 1 |
| [R].ILNNWDVcADMVGTFTDTEdPAk.[F]    | N-Term(iTRAQ4plex); C8(Carbam  | 1 | 1 |
| [K].kDPEGLFLQDNIVAefSVdETGQMSATAk. | N-Term(iTRAQ4plex); K1(iTRAQ4  | 1 | 1 |
| [K].yWGVASFLQk.[G]                 | N-Term(iTRAQ4plex); K10(iTRAQ  | 1 | 1 |
| [K].yWGVASFLQk.[G]                 | N-Term(iTRAQ4plex); K10(iTRAQ  | 1 | 1 |
| [R].dPNGLPPEAQk.[I]                | N-Term(iTRAQ4plex); K11(iTRAQ  | 1 | 1 |
| [R].dPNGLPPEAQk.[I]                | N-Term(iTRAQ4plex); K11(iTRAQ  | 1 | 1 |
| [R].ILNLDGTcADSYFVFSR.[D]          | N-Term(iTRAQ4plex); C8(Carbam  | 1 | 1 |
| [R].ILNLDGTcADSYFVFSR.[D]          | N-Term(iTRAQ4plex); C8(Carbam  | 1 | 1 |

|                                   |                                |   |   |
|-----------------------------------|--------------------------------|---|---|
| [K].kDPEGLFLQDNIVAEFVSDETQMSATAk. | N-Term(iTRAQ4plex); K1(iTRAQ4  | 1 | 1 |
| [R].LIVHNGYcDGR.[S]               | C8(Carbamidomethyl)            | 1 | 1 |
| [R].FSGTWYAMAK.[K]                | K10(iTRAQ4plex)                | 1 | 1 |
| [R].fSGTWYAMAK.[K]                | N-Term(iTRAQ4plex); K10(iTRAQ  | 1 | 1 |
| [R].qEELcLAR.[Q]                  | N-Term(iTRAQ4plex); C5(Carbam  | 1 | 1 |
| [R].QRQEELcLAR.[Q]                | C7(Carbamidomethyl)            | 1 | 1 |
| [R].fSGTWYAMAK.[K]                | N-Term(iTRAQ4plex); K10(iTRAQ  | 1 | 1 |
| [R].fSGTWYAMAK.[K]                | N-Term(iTRAQ4plex); K10(iTRAQ  | 1 | 1 |
| [R].QEELcLAR.[Q]                  | C5(Carbamidomethyl)            | 1 | 1 |
| [R].qEELcLAR.[Q]                  | N-Term(iTRAQ4plex); C5(Carbam  | 1 | 1 |
| [R].QEELcLAR.[Q]                  | C5(Carbamidomethyl)            | 1 | 1 |
| [R].dPNGLPPEAQk.[I]               | N-Term(iTRAQ4plex); K11(iTRAQ  | 1 | 1 |
| [K].yWGVASFLQk.[G]                | N-Term(iTRAQ4plex); K10(iTRAQ  | 1 | 1 |
| [K].yWGVASFLQk.[G]                | N-Term(iTRAQ4plex); K10(iTRAQ  | 1 | 1 |
| [R].qEELcLAR.[Q]                  | N-Term(iTRAQ4plex); C5(Carbam  | 1 | 1 |
| [R].dPNGLPPEAQk.[I]               | N-Term(iTRAQ4plex); K11(iTRAQ  | 1 | 1 |
| [R].qRQEELcLAR.[Q]                | N-Term(iTRAQ4plex); C7(Carbam  | 1 | 1 |
| [R].fSGTWYAMAK.[K]                | N-Term(iTRAQ4plex); K10(iTRAQ  | 1 | 1 |
| [R].fSGTWYAmAk.[K]                | N-Term(iTRAQ4plex); M8(Oxidati | 1 | 1 |
| [R].ILNNWDVcADmVGFTFTEDPAk.[F]    | N-Term(iTRAQ4plex); C8(Carbam  | 1 | 1 |
| [R].FSGTWYAMAK.[K]                | K10(iTRAQ4plex)                | 1 | 1 |
| [R].fSGTWYAMAK.[K]                | N-Term(iTRAQ4plex); K10(iTRAQ  | 1 | 1 |
| [R].fSGTWYAmAk.[K]                | N-Term(iTRAQ4plex); M8(Oxidati | 1 | 1 |
| [R].QRQEELcLAR.[Q]                | C7(Carbamidomethyl)            | 1 | 1 |
| [K].DPTFIPAPIQAK.[T]              | K12(iTRAQ4plex)                | 1 | 1 |
| [R].sLDFTELDVAAEK.[I]             | N-Term(iTRAQ4plex); K13(iTRAQ  | 1 | 1 |
| [R].sLDFTELDVAAEK.[I]             | N-Term(iTRAQ4plex); K13(iTRAQ  | 1 | 1 |
| [K].dPTFIPAPIQAK.[T]              | N-Term(iTRAQ4plex); K12(iTRAQ  | 1 | 1 |
| [K].dPTFIPAPIQAK.[T]              | N-Term(iTRAQ4plex); K12(iTRAQ  | 1 | 1 |
| [K].aLQDQLVLVAAK.[L]              | N-Term(iTRAQ4plex); K12(iTRAQ  | 1 | 1 |
| [K].aLQDQLVLVAAK.[L]              | N-Term(iTRAQ4plex); K12(iTRAQ  | 1 | 1 |
| [K].aLQDQLVLVAAK.[L]              | N-Term(iTRAQ4plex); K12(iTRAQ  | 1 | 1 |
| [K].qPFVQGLALYTPVVLPR.[S]         | N-Term(iTRAQ4plex)             | 1 | 1 |
| [K].qPFVQGLALYTPVVLPR.[S]         | N-Term(iTRAQ4plex)             | 1 | 1 |
| [R].SLDFTELDVAAEK.[I]             | K13(iTRAQ4plex)                | 1 | 1 |
| [R].IQAILGVPWk.[D]                | N-Term(iTRAQ4plex); K10(iTRAQ  | 1 | 1 |
| [R].IQAILGVPWk.[D]                | N-Term(iTRAQ4plex); K10(iTRAQ  | 1 | 1 |
| [R].fmQAVTGWk.[T]                 | N-Term(iTRAQ4plex); K9(iTRAQ4  | 1 | 1 |
| [R].fmQAVTGWk.[T]                 | N-Term(iTRAQ4plex); K9(iTRAQ4  | 1 | 1 |
| [R].fmQAVTGWk.[T]                 | N-Term(iTRAQ4plex); K9(iTRAQ4  | 1 | 1 |
| [R].fmQAVTGWk.[T]                 | N-Term(iTRAQ4plex); K9(iTRAQ4  | 1 | 1 |
| [K].vLSALQAVQGLLVAQGR.[A]         | N-Term(iTRAQ4plex)             | 1 | 1 |
| [K].vLSALQAVQGLLVAQGR.[A]         | N-Term(iTRAQ4plex)             | 1 | 1 |
| [R].tiHLTMPQLVLQGSYDLQDLLAQELPAIL | N-Term(iTRAQ4plex); K38(iTRAQ  | 1 | 1 |
| [R].aAMVGMLANFLGFR.[I]            | N-Term(iTRAQ4plex)             | 1 | 1 |
| [R].sLDFTELDVAAEK.[I]             | N-Term(iTRAQ4plex); K13(iTRAQ  | 1 | 1 |
| [R].fmQAVTGWk.[T]                 | N-Term(iTRAQ4plex); M2(Oxidati | 1 | 1 |
| [R].LQAILGVPWk.[D]                | K10(iTRAQ4plex)                | 1 | 1 |
| [K].aLQDQLVLVAAK.[L]              | N-Term(iTRAQ4plex); K12(iTRAQ  | 1 | 1 |
| [K].aLQDQLVLVAAK.[L]              | N-Term(iTRAQ4plex); K12(iTRAQ  | 1 | 1 |
| [R].FMQAVTGWk.[T]                 | K9(iTRAQ4plex)                 | 1 | 1 |
| [K].DPTFIPAPIQAK.[T]              | K12(iTRAQ4plex)                | 1 | 1 |

|                              |                                |   |   |
|------------------------------|--------------------------------|---|---|
| [R].fMQAVTGWk.[T]            | N-Term(iTRAQ4plex); K9(iTRAQ4  | 1 | 1 |
| [K].dPTFIPAPIQAk.[T]         | N-Term(iTRAQ4plex); K12(iTRAQ4 | 1 | 1 |
| [K].TSPVDEk.[A]              | K7(iTRAQ4plex)                 | 1 | 1 |
| [R].IQAILGVPWk.[D]           | N-Term(iTRAQ4plex); K10(iTRAQ4 | 1 | 1 |
| [K].tSPVDEk.[A]              | N-Term(iTRAQ4plex); K7(iTRAQ4  | 1 | 1 |
| [K].dPTFIPAPIQAk.[T]         | N-Term(iTRAQ4plex); K12(iTRAQ4 | 1 | 1 |
| [K].tSPVDEk.[A]              | N-Term(iTRAQ4plex); K7(iTRAQ4  | 1 | 1 |
| [R].FMQAVTGWk.[T]            | K9(iTRAQ4plex)                 | 1 | 1 |
| [K].tSPVDEk.[A]              | N-Term(iTRAQ4plex); K7(iTRAQ4  | 1 | 1 |
| [K].tSPVDEk.[A]              | N-Term(iTRAQ4plex); K7(iTRAQ4  | 1 | 1 |
| [K].hLVALSPk.[K]             | N-Term(iTRAQ4plex); K8(iTRAQ4  | 1 | 1 |
| [R].sETEIHQGFQHLHQLFAk.[S]   | N-Term(iTRAQ4plex); K18(iTRAQ4 | 1 | 1 |
| [R].sETEIHQGFQHLHQLFAk.[S]   | N-Term(iTRAQ4plex); K18(iTRAQ4 | 1 | 1 |
| [R].sETEIHQGFQHLHQLFAk.[S]   | N-Term(iTRAQ4plex); K18(iTRAQ4 | 1 | 1 |
| [R].sETEIHQGFQHLHQLFAk.[S]   | N-Term(iTRAQ4plex); K18(iTRAQ4 | 1 | 1 |
| [R].sETEIHQGFQHLHQLFAk.[S]   | N-Term(iTRAQ4plex); K18(iTRAQ4 | 1 | 1 |
| [R].sETEIHQGFQHLHQLFAk.[S]   | N-Term(iTRAQ4plex); K18(iTRAQ4 | 1 | 1 |
| [K].HLVALSPk.[K]             | K8(iTRAQ4plex)                 | 1 | 1 |
| [K].hYYESEVLAMNFQDWATASR.[Q] | N-Term(iTRAQ4plex)             | 1 | 1 |
| [K].hYYESEVLAMNFQDWATASR.[Q] | N-Term(iTRAQ4plex)             | 1 | 1 |
| [K].gTWTQPFDLASTR.[E]        | N-Term(iTRAQ4plex)             | 1 | 1 |
| [K].gTWTQPFDLASTR.[E]        | N-Term(iTRAQ4plex)             | 1 | 1 |
| [R].wSAGLTSSQVDLYIPk.[V]     | N-Term(iTRAQ4plex); K16(iTRAQ4 | 1 | 1 |
| [K].hLVALSPk.[K]             | N-Term(iTRAQ4plex); K8(iTRAQ4  | 1 | 1 |
| [K].hLVALSPk.[K]             | N-Term(iTRAQ4plex); K8(iTRAQ4  | 1 | 1 |
| [K].hYYESEVLAMNFQDWATASR.[Q] | N-Term(iTRAQ4plex)             | 1 | 1 |
| [R].eENFYVDETTVvk.[V]        | N-Term(iTRAQ4plex); K13(iTRAQ4 | 1 | 1 |
| [R].gLASANVDFAFSLYk.[H]      | N-Term(iTRAQ4plex); K15(iTRAQ4 | 1 | 1 |
| [R].gLASANVDFAFSLYk.[H]      | N-Term(iTRAQ4plex); K15(iTRAQ4 | 1 | 1 |
| [K].mNTVIAALSR.[D]           | N-Term(iTRAQ4plex)             | 1 | 1 |
| [R].sETEIHQGFQHLHQLFAk.[S]   | N-Term(iTRAQ4plex); K18(iTRAQ4 | 1 | 1 |
| [R].sETEIHQGFQHLHQLFAk.[S]   | N-Term(iTRAQ4plex); K18(iTRAQ4 | 1 | 1 |
| [R].eENFYVDETTVvk.[V]        | N-Term(iTRAQ4plex); K13(iTRAQ4 | 1 | 1 |
| [K].GTWTQPFDLASTR.[E]        |                                | 1 | 1 |
| [R].wSAGLTSSQVDLYIPk.[V]     | N-Term(iTRAQ4plex); K16(iTRAQ4 | 1 | 1 |
| [K].hLVALSPk.[K]             | N-Term(iTRAQ4plex); K8(iTRAQ4  | 1 | 1 |
| [R].gLASANVDFAFSLYk.[H]      | N-Term(iTRAQ4plex); K15(iTRAQ4 | 1 | 1 |
| [R].iTQDAQk.[S]              | N-Term(iTRAQ4plex); K8(iTRAQ4  | 1 | 1 |
| [R].gLASANVDFAFSLYk.[H]      | N-Term(iTRAQ4plex); K15(iTRAQ4 | 1 | 1 |
| [K].hLVALSPk.[K]             | N-Term(iTRAQ4plex); K8(iTRAQ4  | 1 | 1 |
| [K].HLVALSPk.[K]             | K8(iTRAQ4plex)                 | 1 | 1 |
| [R].qINSYvk.[N]              | N-Term(iTRAQ4plex); K7(iTRAQ4  | 1 | 1 |
| [R].wSAGLTSSQVDLYIPk.[V]     | N-Term(iTRAQ4plex); K16(iTRAQ4 | 1 | 1 |
| [R].SETEIHQGFQHLHQLFAk.[S]   | K18(iTRAQ4plex)                | 1 | 1 |
| [K].mNTVIAALSR.[D]           | N-Term(iTRAQ4plex)             | 1 | 1 |
| [R].gLASANVDFAFSLYk.[H]      | N-Term(iTRAQ4plex); K15(iTRAQ4 | 1 | 1 |
| [K].gTWTQPFDLASTR.[E]        | N-Term(iTRAQ4plex)             | 1 | 1 |
| [R].wSAGLTSSQVDLYIPk.[V]     | N-Term(iTRAQ4plex); K16(iTRAQ4 | 1 | 1 |
| [R].wSAGLTSSQVDLYIPk.[V]     | N-Term(iTRAQ4plex); K16(iTRAQ4 | 1 | 1 |
| [R].iQNILTEEPk.[V]           | N-Term(iTRAQ4plex); K10(iTRAQ4 | 1 | 1 |
| [R].iQNILTEEPk.[V]           | N-Term(iTRAQ4plex); K10(iTRAQ4 | 1 | 1 |
| [K].ILIGTVFHk.[AT]           | N-Term(iTRAQ4plex); K9(iTRAQ4  | 1 | 1 |

|                                    |                                |   |   |
|------------------------------------|--------------------------------|---|---|
| [R].eVQPVLPNcNLVk.[G]              | N-Term(iTRAQ4plex); C10(Carbar | 1 | 1 |
| [R].eVQPVLPNcNLVk.[G]              | N-Term(iTRAQ4plex); C10(Carbar | 1 | 1 |
| [K].iFFYDSENPPASEVLR.[I]           | N-Term(iTRAQ4plex)             | 1 | 1 |
| [K].iFFYDSENPPASEVLR.[I]           | N-Term(iTRAQ4plex)             | 1 | 1 |
| [K].iFFYDSENPPASEVLR.[I]           | N-Term(iTRAQ4plex)             | 1 | 1 |
| [K].yVYIAELLAHk.[I]                | N-Term(iTRAQ4plex); K11(iTRAQ  | 1 | 1 |
| [K].yVYIAELLAHk.[I]                | N-Term(iTRAQ4plex); K11(iTRAQ  | 1 | 1 |
| [K].yVYIAELLAHk.[I]                | N-Term(iTRAQ4plex); K11(iTRAQ  | 1 | 1 |
| [K].fDVSSFNPHGISTFTDEDNAMYLlVVNHPI | N-Term(iTRAQ4plex); K32(iTRAQ  | 1 | 1 |
| [K].fDVSSFNPHGISTFTDEDNAMYLlVVNHPI | N-Term(iTRAQ4plex); K32(iTRAQ  | 1 | 1 |
| [R].iQNILTEEPk.[V]                 | N-Term(iTRAQ4plex); K10(iTRAQ  | 1 | 1 |
| [R].iQNILTEEPk.[V]                 | N-Term(iTRAQ4plex); K10(iTRAQ  | 1 | 1 |
| [K].iLLMDLNEEDPTVLELGITGsk.[F]     | N-Term(iTRAQ4plex); K22(iTRAQ  | 1 | 1 |
| [K].iFFYDSENPPASEVLR.[I]           | N-Term(iTRAQ4plex)             | 1 | 1 |
| [K].yVYIAELLAHk.[I]                | N-Term(iTRAQ4plex); K11(iTRAQ  | 1 | 1 |
| [K].sTVELFk.[F]                    | N-Term(iTRAQ4plex); K7(iTRAQ4  | 1 | 1 |
| [R].nHQSSYQTR.[L]                  | N-Term(iTRAQ4plex)             | 1 | 1 |
| [K].sFNPNSPGk.[I]                  | N-Term(iTRAQ4plex); K9(iTRAQ4  | 1 | 1 |
| [K].LLIGTVFHk.[AT]                 | K9(iTRAQ4plex)                 | 1 | 1 |
| [R].iQNILTEEPk.[V]                 | N-Term(iTRAQ4plex); K10(iTRAQ  | 1 | 1 |
| [K].LLIGTVFHk.[AT]                 | N-Term(iTRAQ4plex); K9(iTRAQ4  | 1 | 1 |
| [K].LLIGTVFHk.[AT]                 | N-Term(iTRAQ4plex); K9(iTRAQ4  | 1 | 1 |
| [K].sFNPNSPGk.[I]                  | N-Term(iTRAQ4plex); K9(iTRAQ4  | 1 | 1 |
| [R].iQNILTEEPk.[V]                 | N-Term(iTRAQ4plex); K10(iTRAQ  | 1 | 1 |
| [K].dDINSYEcWcPFGFEGk.[N]          | N-Term(iTRAQ4plex); C8(Carbam  | 1 | 1 |
| [K].fGSGYVSGWGR.[V]                | N-Term(iTRAQ4plex)             | 1 | 1 |
| [R].iIPHHNYNAAInk.[Y]              | N-Term(iTRAQ4plex); K13(iTRAQ  | 1 | 1 |
| [R].iIPHHNYNAAInk.[Y]              | N-Term(iTRAQ4plex); K13(iTRAQ  | 1 | 1 |
| [K].wIVTAAHcVETGVk.[I]             | N-Term(iTRAQ4plex); C8(Carbam  | 1 | 1 |
| [K].wIVTAAHcVETGVk.[I]             | N-Term(iTRAQ4plex); C8(Carbam  | 1 | 1 |
| [K].wIVTAAHcVETGVk.[I]             | N-Term(iTRAQ4plex); C8(Carbam  | 1 | 1 |
| [K].iTVVAGEHNIETEHETEQk.[R]        | N-Term(iTRAQ4plex); K19(iTRAQ  | 1 | 1 |
| [R].vSVSQTsk.[L]                   | N-Term(iTRAQ4plex); K8(iTRAQ4  | 1 | 1 |
| [R].iIPHHNYNAAInk.[Y]              | N-Term(iTRAQ4plex); K13(iTRAQ  | 1 | 1 |
| [K].eYTNIFLk.[F]                   | N-Term(iTRAQ4plex); K8(iTRAQ4  | 1 | 1 |
| [K].ncELDVTcNik.[N]                | N-Term(iTRAQ4plex); C2(Carbam  | 1 | 1 |
| [R].sALVLQYLR.[V]                  | N-Term(iTRAQ4plex)             | 1 | 1 |
| [R].iIPHHNYNAAInk.[Y]              | N-Term(iTRAQ4plex); K13(iTRAQ  | 1 | 1 |
| [K].fGSGYVSGWGR.[V]                | N-Term(iTRAQ4plex)             | 1 | 1 |
| [K].vDAFcGGSIVNEk.[W]              | N-Term(iTRAQ4plex); C5(Carbam  | 1 | 1 |
| [R].sALVLQYLR.[V]                  |                                | 1 | 1 |
| [K].eYTNIFLk.[F]                   | N-Term(iTRAQ4plex); K8(iTRAQ4  | 1 | 1 |
| [R].aNLQSVPHASASRPR.[V]            | N-Term(iTRAQ4plex)             | 1 | 1 |
| [R].aNLQSVPHASASRPR.[V]            | N-Term(iTRAQ4plex)             | 1 | 1 |
| [R].aLADGVQk.[V]                   | N-Term(iTRAQ4plex); K8(iTRAQ4  | 1 | 1 |
| [R].aLADGVQk.[V]                   | N-Term(iTRAQ4plex); K8(iTRAQ4  | 1 | 1 |
| [K].sETAEElkk.[V]                  | N-Term(iTRAQ4plex); K8(iTRAQ4  | 1 | 1 |
| [K].wWTQAQAHDlVik.[S]              | N-Term(iTRAQ4plex); K13(iTRAQ  | 1 | 1 |
| [K].sELEDNIR.[R]                   | N-Term(iTRAQ4plex)             | 1 | 1 |
| [K].vAQELEEk.[L]                   | N-Term(iTRAQ4plex); K8(iTRAQ4  | 1 | 1 |
| [K].INILNNNyk.[I]                  | N-Term(iTRAQ4plex); K9(iTRAQ4  | 1 | 1 |
| [K].sETAEElkk.[V]                  | N-Term(iTRAQ4plex); K8(iTRAQ4  | 1 | 1 |



|                                    |                                |   |   |
|------------------------------------|--------------------------------|---|---|
| [R].hTFMGVVSLGSPSGEVSHPR.[K]       | N-Term(iTRAQ4plex)             | 1 | 1 |
| [R].HTFMGVVSLGSPSGEVSHPR.[K]       |                                | 1 | 1 |
| [R].hTFMGVVSLGSPSGEVSHPR.[K]       | N-Term(iTRAQ4plex)             | 1 | 1 |
| [R].hTFmGVVSLGSPSGEVSHPR.[K]       | N-Term(iTRAQ4plex); M4(Oxidati | 1 | 1 |
| [R].hTFmGVVSLGSPSGEVSHPR.[K]       | N-Term(iTRAQ4plex); M4(Oxidati | 1 | 1 |
| [R].hTFmGVVSLGSPSGEVSHPR.[K]       | N-Term(iTRAQ4plex); M4(Oxidati | 1 | 1 |
| [R].HTFMGVVSLGSPSGEVSHPR.[K]       |                                | 1 | 1 |
| [R].HTFMGVVSLGSPSGEVSHPR.[K]       |                                | 1 | 1 |
| [R].HTFMGVVSLGSPSGEVSHPR.[K]       |                                | 1 | 1 |
| [R].HTFMGVVSLGSPSGEVSHPR.[K]       |                                | 1 | 1 |
| [R].qPNcDDPETEEAALVAIDYINQNLPGWYk. | N-Term(iTRAQ4plex); C4(Carbam  | 1 | 1 |
| [R].qPNcDDPETEEAALVAIDYINQNLPGWYk. | N-Term(iTRAQ4plex); C4(Carbam  | 1 | 1 |
| [R].tVVQPSVGAAAGPVVPPcPGR.[I]      | N-Term(iTRAQ4plex); C18(Carbar | 1 | 1 |
| [R].tVVQPSVGAAAGPVVPPcPGR.[I]      | N-Term(iTRAQ4plex); C18(Carbar | 1 | 1 |
| [R].tVVQPSVGAAAGPVVPPcPGR.[I]      | N-Term(iTRAQ4plex); C18(Carbar | 1 | 1 |
| [R].tVVQPSVGAAAGPVVPPcPGR.[I]      | N-Term(iTRAQ4plex); C18(Carbar | 1 | 1 |
| [K].vWPQQPSGELFEIIDLTTcHVLDPDTPVA  | N-Term(iTRAQ4plex); C22(Carbar | 1 | 1 |
| [K].vWPQQPSGELFEIIDLTTcHVLDPDTPVA  | N-Term(iTRAQ4plex); C22(Carbar | 1 | 1 |
| [R].tVVQPSVGAAAGPVVPPcPGR.[I]      | N-Term(iTRAQ4plex); C18(Carbar | 1 | 1 |
| [R].TVVQPSVGAAAGPVVPPcPGR.[I]      | C18(Carbamidomethyl)           | 1 | 1 |
| [K].vWPQQPSGELFEIIDLTTcHVLDPDTPVA  | N-Term(iTRAQ4plex); C22(Carbar | 1 | 1 |
| [R].aQLVPLPPSTYVEFTVSGTDcVak.[E]   | N-Term(iTRAQ4plex); C21(Carbar | 1 | 1 |
| [K].hTLNQIDEV.[V]                  | N-Term(iTRAQ4plex); K10(iTRAQ  | 1 | 1 |
| [K].fSVVYak.[C]                    | N-Term(iTRAQ4plex); K7(iTRAQ4  | 1 | 1 |
| [R].AQLVPLPPSTYVEFTVSGTDcVak.[E]   | C21(Carbamidomethyl); K24(iTR  | 1 | 1 |
| [R].aQLVPLPPSTYVEFTVSGTDcVak.[E]   | N-Term(iTRAQ4plex); C21(Carbar | 1 | 1 |
| [R].aQLVPLPPSTYVEFTVSGTDcVak.[E]   | N-Term(iTRAQ4plex); C21(Carbar | 1 | 1 |
| [K].eHAVEGDcDFQLLk.[L]             | N-Term(iTRAQ4plex); C8(Carbam  | 1 | 1 |
| [K].eHAVEGDcDFQLLk.[L]             | N-Term(iTRAQ4plex); C8(Carbam  | 1 | 1 |
| [K].eHAVEGDcDFQLLk.[L]             | N-Term(iTRAQ4plex); C8(Carbam  | 1 | 1 |
| [K].EHAVEGDcDFQLLk.[L]             | C8(Carbamidomethyl); K14(iTRA  | 1 | 1 |
| [K].eHAVEGDcDFQLLk.[L]             | N-Term(iTRAQ4plex); C8(Carbam  | 1 | 1 |
| [K].eHAVEGDcDFQLLk.[L]             | N-Term(iTRAQ4plex); C8(Carbam  | 1 | 1 |
| [K].eHAVEGDcDFQLLk.[L]             | N-Term(iTRAQ4plex); C8(Carbam  | 1 | 1 |
| [K].eHAVEGDcDFQLLk.[L]             | N-Term(iTRAQ4plex); C8(Carbam  | 1 | 1 |
| [K].eHAVEGDcDFQLLk.[L]             | N-Term(iTRAQ4plex); C8(Carbam  | 1 | 1 |
| [K].eHAVEGDcDFQLLk.[L]             | N-Term(iTRAQ4plex); C8(Carbam  | 1 | 1 |
| [K].eHAVEGDcDFQLLk.[L]             | N-Term(iTRAQ4plex); C8(Carbam  | 1 | 1 |
| [K].eHAVEGDcDFQLLk.[L]             | N-Term(iTRAQ4plex); C8(Carbam  | 1 | 1 |
| [K].eHAVEGDcDFQLLk.[L]             | N-Term(iTRAQ4plex); C8(Carbam  | 1 | 1 |
| [K].eHAVEGDcDFQLLk.[L]             | N-Term(iTRAQ4plex); C8(Carbam  | 1 | 1 |
| [K].EHAVEGDcDFQLLk.[L]             | C8(Carbamidomethyl); K14(iTRA  | 1 | 1 |
| [K].eHAVEGDcDFQLLk.[L]             | N-Term(iTRAQ4plex); C8(Carbam  | 1 | 1 |
| [R].aQLVPLPPSTYVEFTVSGTDcVak.[E]   | N-Term(iTRAQ4plex); C21(Carbar | 1 | 1 |
| [K].hTLNQIDEV.[V]                  | N-Term(iTRAQ4plex); K10(iTRAQ  | 1 | 1 |
| [K].hTLNQIDEV.[V]                  | N-Term(iTRAQ4plex); K10(iTRAQ  | 1 | 1 |
| [K].hTLNQIDEV.[V]                  | N-Term(iTRAQ4plex); K10(iTRAQ  | 1 | 1 |
| [K].hTLNQIDEV.[V]                  | N-Term(iTRAQ4plex); K10(iTRAQ  | 1 | 1 |
| [K].hTLNQIDEV.[V]                  | N-Term(iTRAQ4plex); K10(iTRAQ  | 1 | 1 |
| [K].HTLNQIDEV.[V]                  | K10(iTRAQ4plex)                | 1 | 1 |
| [K].eHAVEGDcDFQLLk.[L]             | N-Term(iTRAQ4plex); C8(Carbam  | 1 | 1 |
| [K].cDSSPSAEDVR.[K]                | C1(Carbamidomethyl)            | 1 | 1 |

|                                |                                |   |   |
|--------------------------------|--------------------------------|---|---|
| [K].eHAVEGDcDFQLLk.[L]         | N-Term(iTRAQ4plex); C8(Carbam  | 1 | 1 |
| [R].aQLVLPSTYVEFTVSGTDcVAk.[E] | N-Term(iTRAQ4plex); C21(Carbar | 1 | 1 |
| [K].hTLNQIDEVQk.[V]            | N-Term(iTRAQ4plex); K10(iTRAQ  | 1 | 1 |
| [K].cDSSPDSAEDVR.[K]           | N-Term(iTRAQ4plex); C1(Carbam  | 1 | 1 |
| [R].hTFmGVVSLGSPSGEVSHPR.[K]   | N-Term(iTRAQ4plex); M4(Oxidat  | 1 | 1 |
| [K].eATEAAk.[C]                | N-Term(iTRAQ4plex); K7(iTRAQ4  | 1 | 1 |
| [R].TVVQPSVGAAAGPVVPPcPGR.[I]  | C18(Carbamidomethyl)           | 1 | 1 |
| [K].eATEAAk.[C]                | N-Term(iTRAQ4plex); K7(iTRAQ4  | 1 | 1 |
| [K].hTLNQIDEVQk.[V]            | N-Term(iTRAQ4plex); K10(iTRAQ  | 1 | 1 |
| [K].hTLNQIDEVQk.[V]            | N-Term(iTRAQ4plex); K10(iTRAQ  | 1 | 1 |
| [K].eHAVEGDcDFQLLk.[L]         | N-Term(iTRAQ4plex); C8(Carbam  | 1 | 1 |
| [K].HTLNQIDEVQk.[V]            | K10(iTRAQ4plex)                | 1 | 1 |
| [K].eHAVEGDcDFQLLk.[L]         | N-Term(iTRAQ4plex); C8(Carbam  | 1 | 1 |
| [K].fSVVYak.[C]                | N-Term(iTRAQ4plex); K7(iTRAQ4  | 1 | 1 |
| [R].hTFMGGVSLGSPSGEVSHPR.[K]   | N-Term(iTRAQ4plex)             | 1 | 1 |
| [K].hTLNQIDEVQk.[V]            | N-Term(iTRAQ4plex); K10(iTRAQ  | 1 | 1 |
| [K].HTLNQIDEVQk.[V]            | K10(iTRAQ4plex)                | 1 | 1 |
| [K].eATEAAk.[C]                | N-Term(iTRAQ4plex); K7(iTRAQ4  | 1 | 1 |
| [K].fSVVYak.[C]                | N-Term(iTRAQ4plex); K7(iTRAQ4  | 1 | 1 |
| [K].eATEAAk.[C]                | N-Term(iTRAQ4plex); K7(iTRAQ4  | 1 | 1 |
| [R].HTFmGVVSLGSPSGEVSHPR.[K]   | M4(Oxidation)                  | 1 | 1 |
| [R].hTFmGVVSLGSPSGEVSHPR.[K]   | N-Term(iTRAQ4plex); M4(Oxidat  | 1 | 1 |
| [K].hTLNQIDEVQk.[V]            | N-Term(iTRAQ4plex); K10(iTRAQ  | 1 | 1 |
| [R].hTFmGVVSLGSPSGEVSHPR.[K]   | N-Term(iTRAQ4plex); M4(Oxidat  | 1 | 1 |
| [K].fSVVYak.[C]                | N-Term(iTRAQ4plex); K7(iTRAQ4  | 1 | 1 |
| [K].fSVVYak.[C]                | N-Term(iTRAQ4plex); K7(iTRAQ4  | 1 | 1 |
| [K].hTLNQIDEVQk.[V]            | N-Term(iTRAQ4plex); K10(iTRAQ  | 1 | 1 |
| [K].cDSSPDSAEDVR.[K]           | C1(Carbamidomethyl)            | 1 | 1 |
| [K].eATEAAk.[C]                | N-Term(iTRAQ4plex); K7(iTRAQ4  | 1 | 1 |
| [R].tVVQPSVGAAAGPVVPPcPGR.[I]  | N-Term(iTRAQ4plex); C18(Carbar | 1 | 1 |
| [K].eHAVEGDcDFQLLk.[L]         | N-Term(iTRAQ4plex); C8(Carbam  | 1 | 1 |
| [K].FSVVYak.[C]                | K7(iTRAQ4plex)                 | 1 | 1 |
| [K].fSVVYak.[C]                | N-Term(iTRAQ4plex); K7(iTRAQ4  | 1 | 1 |
| [R].hTFmGVVSLGSPSGEVSHPR.[K]   | N-Term(iTRAQ4plex); M4(Oxidat  | 1 | 1 |
| [K].eATEAAk.[C]                | N-Term(iTRAQ4plex); K7(iTRAQ4  | 1 | 1 |
| [K].eATEAAk.[C]                | N-Term(iTRAQ4plex); K7(iTRAQ4  | 1 | 1 |
| [K].fSVVYak.[C]                | N-Term(iTRAQ4plex); K7(iTRAQ4  | 1 | 1 |
| [R].hTFmGVVSLGSPSGEVSHPR.[K]   | N-Term(iTRAQ4plex); M4(Oxidat  | 1 | 1 |
| [K].hTLNQIDEVQk.[V]            | N-Term(iTRAQ4plex); K10(iTRAQ  | 1 | 1 |
| [R].hTFMGGVSLGSPSGEVSHPR.[K]   | N-Term(iTRAQ4plex)             | 1 | 1 |
| [R].hTFmGVVSLGSPSGEVSHPR.[K]   | N-Term(iTRAQ4plex); M4(Oxidat  | 1 | 1 |
| [K].fSVVYak.[C]                | N-Term(iTRAQ4plex); K7(iTRAQ4  | 1 | 1 |
| [K].eATEAAk.[C]                | N-Term(iTRAQ4plex); K7(iTRAQ4  | 1 | 1 |
| [K].cNLLAEk.[Q]                | N-Term(iTRAQ4plex); C1(Carbam  | 1 | 1 |
| [K].FSVVYak.[C]                | K7(iTRAQ4plex)                 | 1 | 1 |
| [R].TVVQPSVGAAAGPVVPPcPGR.[I]  | C18(Carbamidomethyl)           | 1 | 1 |
| [K].HTLNQIDEVQk.[V]            | K10(iTRAQ4plex)                | 1 | 1 |
| [K].FSVVYak.[C]                | K7(iTRAQ4plex)                 | 1 | 1 |
| [K].eHAVEGDcDFQLLk.[L]         | N-Term(iTRAQ4plex); C8(Carbam  | 1 | 1 |
| [R].hTFMGGVSLGSPSGEVSHPR.[K]   | N-Term(iTRAQ4plex)             | 1 | 1 |
| [K].HTLNQIDEVQk.[V]            | K10(iTRAQ4plex)                | 1 | 1 |
| [K].fSVVYak.[C]                | N-Term(iTRAQ4plex); K7(iTRAQ4  | 1 | 1 |



|                                |                                |   |   |
|--------------------------------|--------------------------------|---|---|
| [K].eHAVEGDcDFQLLk.[L]         | N-Term(iTRAQ4plex); C8(Carbam  | 1 | 1 |
| [R].hTFMGVVSLGSPSGEVSHPR.[K]   | N-Term(iTRAQ4plex)             | 1 | 1 |
| [R].tVVQPSVGAAAGPVVPPcPGR.[I]  | N-Term(iTRAQ4plex); C18(Carbar | 1 | 1 |
| [K].eHAVEGDcDFQLLk.[L]         | N-Term(iTRAQ4plex); C8(Carbam  | 1 | 1 |
| [K].fSVVYak.[C]                | N-Term(iTRAQ4plex); K7(iTRAQ4  | 1 | 1 |
| [K].HTLNQIDEVk.[V]             | K10(iTRAQ4plex)                | 1 | 1 |
| [K].EHAVEGDcDFQLLk.[L]         | C8(Carbamidomethyl); K14(iTRA  | 1 | 1 |
| [K].fSVVYak.[C]                | N-Term(iTRAQ4plex); K7(iTRAQ4  | 1 | 1 |
| [K].eHAVEGDcDFQLLk.[L]         | N-Term(iTRAQ4plex); C8(Carbam  | 1 | 1 |
| [R].hTFMGVVSLGSPSGEVSHPR.[K]   | N-Term(iTRAQ4plex)             | 1 | 1 |
| [R].hTFmGVVSLGSPSGEVSHPR.[K]   | N-Term(iTRAQ4plex); M4(Oxidati | 1 | 1 |
| [R].aQLVLPSTYVEFTVSGTDcVAK.[E] | N-Term(iTRAQ4plex); C21(Carbar | 1 | 1 |
| [K].EHAVEGDcDFQLLk.[L]         | C8(Carbamidomethyl); K14(iTRA  | 1 | 1 |
| [K].cDSSPDSAEDVR.[K]           | N-Term(iTRAQ4plex); C1(Carbam  | 1 | 1 |
| [K].FSVVYak.[C]                | K7(iTRAQ4plex)                 | 1 | 1 |
| [K].yVmLPVADQDQcIR.[H]         | N-Term(iTRAQ4plex); M3(Oxidati | 1 | 1 |
| [K].yVmLPVADQDQcIR.[H]         | N-Term(iTRAQ4plex); M3(Oxidati | 1 | 1 |
| [K].scAVAEGVYVv.[V]            | N-Term(iTRAQ4plex); C2(Carbam  | 2 | 2 |
| [R].iLGGHLDak.[G]              | N-Term(iTRAQ4plex); K9(iTRAQ4  | 2 | 2 |
| [R].iLGGHLDak.[G]              | N-Term(iTRAQ4plex); K9(iTRAQ4  | 2 | 2 |
| [R].iLGGHLDak.[G]              | N-Term(iTRAQ4plex); K9(iTRAQ4  | 2 | 2 |
| [R].nANFkFTDHLk.[Y]            | N-Term(iTRAQ4plex); K5(iTRAQ4  | 1 | 1 |
| [K].vTSIQDWVQk.[T]             | N-Term(iTRAQ4plex); K10(iTRAQ  | 1 | 1 |
| [R].iLGGHLDak.[G]              | N-Term(iTRAQ4plex); K9(iTRAQ4  | 2 | 2 |
| [K].vVLHPNYSQVDIGLIK.[L]       | N-Term(iTRAQ4plex); K16(iTRAQ  | 1 | 1 |
| [K].sPVGvQPILNEHTFcAGMSk.[Y]   | N-Term(iTRAQ4plex); C15(Carbar | 1 | 1 |
| [K].sPVGvQPILNEHTFcAGMSk.[Y]   | N-Term(iTRAQ4plex); C15(Carbar | 1 | 1 |
| [K].diAPTLLTYVgk.[K]           | N-Term(iTRAQ4plex); K12(iTRAQ  | 2 | 2 |
| [K].diAPTLLTYVgk.[K]           | N-Term(iTRAQ4plex); K12(iTRAQ  | 2 | 2 |
| [K].sPVGvQPILNEHTFcAGMSk.[Y]   | N-Term(iTRAQ4plex); C15(Carbar | 1 | 1 |
| [K].SPVGvQPILNEHTFcAGMSk.[Y]   | C15(Carbamidomethyl); K20(iTR  | 1 | 1 |
| [K].vTSIQDWVQk.[T]             | N-Term(iTRAQ4plex); K10(iTRAQ  | 1 | 1 |
| [K].vTSIQDWVQk.[T]             | N-Term(iTRAQ4plex); K10(iTRAQ  | 1 | 1 |
| [K].vTSIQDWVQk.[T]             | N-Term(iTRAQ4plex); K10(iTRAQ  | 1 | 1 |
| [K].vTSIQDWVQk.[T]             | N-Term(iTRAQ4plex); K10(iTRAQ  | 1 | 1 |
| [K].yVmLPVADQDQcIR.[H]         | N-Term(iTRAQ4plex); M3(Oxidati | 1 | 1 |
| [K].yVmLPVADQDQcIR.[H]         | N-Term(iTRAQ4plex); M3(Oxidati | 1 | 1 |
| [K].yVmLPVADQDQcIR.[H]         | N-Term(iTRAQ4plex); M3(Oxidati | 1 | 1 |
| [K].vTSIQDWVQk.[T]             | N-Term(iTRAQ4plex); K10(iTRAQ  | 1 | 1 |
| [K].yVMPLVADQDQcIR.[H]         | N-Term(iTRAQ4plex); C12(Carbar | 1 | 1 |
| [K].yVMPLVADQDQcIR.[H]         | N-Term(iTRAQ4plex); C12(Carbar | 1 | 1 |
| [K].yVMPLVADQDQcIR.[H]         | N-Term(iTRAQ4plex); C12(Carbar | 1 | 1 |
| [K].yVMPLVADQDQcIR.[H]         | N-Term(iTRAQ4plex); C12(Carbar | 1 | 1 |
| [K].DIAPTLLTYVgk.[K]           | K12(iTRAQ4plex)                | 2 | 2 |
| [K].diAPTLLTYVgk.[K]           | N-Term(iTRAQ4plex); K12(iTRAQ  | 2 | 2 |
| [K].diAPTLLTYVgk.[K]           | N-Term(iTRAQ4plex); K12(iTRAQ  | 2 | 2 |
| [R].hYEGSTVPEkk.[T]            | N-Term(iTRAQ4plex); K10(iTRAQ  | 1 | 1 |
| [R].hYEGSTVPEk.[K]             | N-Term(iTRAQ4plex); K10(iTRAQ  | 1 | 1 |
| [R].hYEGSTVPEk.[K]             | N-Term(iTRAQ4plex); K10(iTRAQ  | 1 | 1 |
| [R].hYEGSTVPEk.[K]             | N-Term(iTRAQ4plex); K10(iTRAQ  | 1 | 1 |
| [R].hYEGSTVPEk.[K]             | N-Term(iTRAQ4plex); K10(iTRAQ  | 1 | 1 |
| [R].hYEGSTVPEk.[K]             | N-Term(iTRAQ4plex); K10(iTRAQ  | 1 | 1 |
| [R].teGDGVYTLNDk.[K]           | N-Term(iTRAQ4plex); K12(iTRAQ  | 2 | 2 |

|                                   |                                |   |   |
|-----------------------------------|--------------------------------|---|---|
| [R].tEGDGVVTLNDk.[K]              | N-Term(iTRAQ4plex); K12(iTRAQ  | 2 | 2 |
| [R].tEGDGVVTLNNEk.[Q]             | N-Term(iTRAQ4plex); K13(iTRAQ  | 1 | 1 |
| [R].tEGDGVVTLNNEk.[Q]             | N-Term(iTRAQ4plex); K13(iTRAQ  | 1 | 1 |
| [R].tEGDGVVTLNDk.[K]              | N-Term(iTRAQ4plex); K12(iTRAQ  | 2 | 2 |
| [R].tEGDGVVTLNNEk.[Q]             | N-Term(iTRAQ4plex); K13(iTRAQ  | 1 | 1 |
| [R].TEGDGVVTLNNEk.[Q]             | K13(iTRAQ4plex)                | 1 | 1 |
| [R].tEGDGVVTLNNEk.[Q]             | N-Term(iTRAQ4plex); K13(iTRAQ  | 1 | 1 |
| [R].tEGDGVVTLNNEk.[Q]             | N-Term(iTRAQ4plex); K13(iTRAQ  | 1 | 1 |
| [R].tEGDGVVTLNNEk.[Q]             | N-Term(iTRAQ4plex); K13(iTRAQ  | 1 | 1 |
| [R].tEGDGVVTLNNEk.[Q]             | N-Term(iTRAQ4plex); K13(iTRAQ  | 1 | 1 |
| [K].scAVAEGVYVvk.[V]              | N-Term(iTRAQ4plex); C2(Carbam  | 2 | 2 |
| [K].scAVAEGVYVvk.[V]              | N-Term(iTRAQ4plex); C2(Carbam  | 2 | 2 |
| [K].scAVAEGVYVvk.[V]              | N-Term(iTRAQ4plex); C2(Carbam  | 2 | 2 |
| [K].scAVAEGVYVvk.[V]              | N-Term(iTRAQ4plex); C2(Carbam  | 2 | 2 |
| [K].scAVAEGVYVvk.[V]              | N-Term(iTRAQ4plex); C2(Carbam  | 2 | 2 |
| [K].IPEcEADDGcPkpPEIAHGVEHSVR.[Y] | N-Term(iTRAQ4plex); C4(Carbam  | 1 | 1 |
| [K].IPEcEADDGcPkpPEIAHGVEHSVR.[Y] | N-Term(iTRAQ4plex); C4(Carbam  | 1 | 1 |
| [K].scAVAEGVYVvk.[V]              | N-Term(iTRAQ4plex); C2(Carbam  | 2 | 2 |
| [K].scAVAEGVYVvk.[V]              | N-Term(iTRAQ4plex); C2(Carbam  | 2 | 2 |
| [K].scAVAEGVYVvk.[V]              | N-Term(iTRAQ4plex); C2(Carbam  | 2 | 2 |
| [K].IPEcEADDGcPkpPEIAHGVEHSVR.[Y] | N-Term(iTRAQ4plex); C4(Carbam  | 1 | 1 |
| [K].scAVAEGVYVvk.[V]              | N-Term(iTRAQ4plex); C2(Carbam  | 2 | 2 |
| [K].scAVAEGVYVvk.[V]              | N-Term(iTRAQ4plex); C2(Carbam  | 2 | 2 |
| [K].scAVAEGVYVvk.[V]              | N-Term(iTRAQ4plex); C2(Carbam  | 2 | 2 |
| [R].vMPicLPSk.[ND]                | N-Term(iTRAQ4plex); C5(Carbam  | 2 | 2 |
| [K].IPEcEAVcGkPk.[N]              | N-Term(iTRAQ4plex); C4(Carbam  | 2 | 2 |
| [K].IPEcEAVcGkPk.[N]              | N-Term(iTRAQ4plex); C4(Carbam  | 2 | 2 |
| [K].kQLVEIEk.[V]                  | N-Term(iTRAQ4plex); K1(iTRAQ4  | 2 | 2 |
| [K].diAPTLTLVVGk.[Q]              | N-Term(iTRAQ4plex); K12(iTRAQ  | 2 | 2 |
| [K].vTSIQDWVQk.[T]                | N-Term(iTRAQ4plex); K10(iTRAQ  | 1 | 1 |
| [R].hYEGSTVPEk.[K]                | N-Term(iTRAQ4plex); K10(iTRAQ  | 1 | 1 |
| [R].vGYVSGWGR.[N]                 | N-Term(iTRAQ4plex)             | 1 | 1 |
| [R].hYEGSTVPEk.[K]                | N-Term(iTRAQ4plex); K10(iTRAQ  | 1 | 1 |
| [R].VMPicLPSk.[ND]                | C5(Carbamidomethyl); K9(iTRAC  | 2 | 2 |
| [R].hYEGSTVPEk.[K]                | N-Term(iTRAQ4plex); K10(iTRAQ  | 1 | 1 |
| [R].hYEGSTVPEk.[K]                | N-Term(iTRAQ4plex); K10(iTRAQ  | 1 | 1 |
| [K].scAVAEGVYVvk.[V]              | N-Term(iTRAQ4plex); C2(Carbam  | 2 | 2 |
| [K].diAPTLTLVVGk.[K]              | N-Term(iTRAQ4plex); K12(iTRAQ  | 2 | 2 |
| [K].gSFPWQak.[M]                  | N-Term(iTRAQ4plex); K8(iTRAQ4  | 2 | 2 |
| [R].hYEGSTVPEk.[K]                | N-Term(iTRAQ4plex); K10(iTRAQ  | 1 | 1 |
| [K].gSFPWQak.[M]                  | N-Term(iTRAQ4plex); K8(iTRAQ4  | 2 | 2 |
| [K].gSFPWQak.[M]                  | N-Term(iTRAQ4plex); K8(iTRAQ4  | 2 | 2 |
| [K].scAVAEGVYVvk.[V]              | N-Term(iTRAQ4plex); C2(Carbam  | 2 | 2 |
| [K].yVMLPVADQDQcIR.[H]            | N-Term(iTRAQ4plex); C12(Carbar | 1 | 1 |
| [R].hYEGSTVPEk.[T]                | N-Term(iTRAQ4plex); K10(iTRAQ  | 1 | 1 |
| [R].hYEGSTVPEk.[K]                | N-Term(iTRAQ4plex); K10(iTRAQ  | 1 | 1 |
| [R].hYEGSTVPEk.[K]                | N-Term(iTRAQ4plex); K10(iTRAQ  | 1 | 1 |
| [R].vMPicLPSk.[ND]                | N-Term(iTRAQ4plex); C5(Carbam  | 2 | 2 |
| [K].vTSIQDWVQk.[T]                | K10(iTRAQ4plex)                | 1 | 1 |
| [R].hYEGSTVPEk.[K]                | N-Term(iTRAQ4plex); K10(iTRAQ  | 1 | 1 |
| [R].VMPicLPSk.[ND]                | C5(Carbamidomethyl); K9(iTRAC  | 2 | 2 |
| [R].iLGGHLDak.[G]                 | N-Term(iTRAQ4plex); K9(iTRAQ4  | 2 | 2 |

|                                  |                                          |   |   |
|----------------------------------|------------------------------------------|---|---|
| [R].hYEGSTVPEK.[K]               | N-Term(iTRAQ4plex); K10(iTRAQ4plex)      | 1 | 1 |
| [K].dIAPTLTYVVGk.[K]             | N-Term(iTRAQ4plex); K12(iTRAQ4plex)      | 2 | 2 |
| [R].vMPicLPSk.[ND]               | N-Term(iTRAQ4plex); C5(Carbamidomethyl)  | 2 | 2 |
| [R].vmPicLPSk.[ND]               | N-Term(iTRAQ4plex); M2(Oxidation)        | 2 | 2 |
| [R].tEGDGVYTLNNEk.[Q]            | N-Term(iTRAQ4plex); K13(iTRAQ4plex)      | 1 | 1 |
| [R].iLGGHLDak.[G]                | N-Term(iTRAQ4plex); K9(iTRAQ4plex)       | 2 | 2 |
| [K].QLVEIEk.[V]                  | K7(iTRAQ4plex)                           | 2 | 2 |
| [R].iLGGHLDak.[G]                | N-Term(iTRAQ4plex); K9(iTRAQ4plex)       | 2 | 2 |
| [K].VTSIQDWVQk.[T]               | K10(iTRAQ4plex)                          | 1 | 1 |
| [R].iLGGHLDak.[G]                | N-Term(iTRAQ4plex); K9(iTRAQ4plex)       | 2 | 2 |
| [R].vGYVSGWGR.[N]                | N-Term(iTRAQ4plex)                       | 1 | 1 |
| [K].IkQkVSVNER.[V]               | N-Term(iTRAQ4plex); K2(iTRAQ4plex)       | 1 | 1 |
| [R].TEGDGVYTLNDk.[K]             | K12(iTRAQ4plex)                          | 2 | 2 |
| [K].qLVEIEk.[V]                  | N-Term(iTRAQ4plex); K7(iTRAQ4plex)       | 2 | 2 |
| [R].iLGGHLDak.[G]                | K9(iTRAQ4plex)                           | 2 | 2 |
| [K].yVmLPVADQDQcIR.[H]           | N-Term(iTRAQ4plex); M3(Oxidation)        | 1 | 1 |
| [K].yVMPLVADQDQcIR.[H]           | N-Term(iTRAQ4plex); C12(Carbamidomethyl) | 1 | 1 |
| [R].hYEGSTVPEK.[K]               | N-Term(iTRAQ4plex); K10(iTRAQ4plex)      | 1 | 1 |
| [K].YVMPLVADQDQcIR.[H]           | C12(Carbamidomethyl)                     | 1 | 1 |
| [R].hYEGSTVPEKk.[T]              | N-Term(iTRAQ4plex); K10(iTRAQ4plex)      | 1 | 1 |
| [K].gSFPWQak.[M]                 | N-Term(iTRAQ4plex); K8(iTRAQ4plex)       | 2 | 2 |
| [R].VMPicLPSk.[ND]               | C5(Carbamidomethyl); K9(iTRAQ4plex)      | 2 | 2 |
| [K].gSFPWQak.[M]                 | N-Term(iTRAQ4plex); K8(iTRAQ4plex)       | 2 | 2 |
| [K].vTSIQDWVQk.[T]               | N-Term(iTRAQ4plex); K10(iTRAQ4plex)      | 1 | 1 |
| [K].yVMPLVADQDQcIR.[H]           | N-Term(iTRAQ4plex); C12(Carbamidomethyl) | 1 | 1 |
| [K].gSFPWQak.[M]                 | N-Term(iTRAQ4plex); K8(iTRAQ4plex)       | 2 | 2 |
| [R].vGYVSGWGR.[N]                | N-Term(iTRAQ4plex)                       | 1 | 1 |
| [R].vGYVSGWGR.[N]                | N-Term(iTRAQ4plex)                       | 1 | 1 |
| [R].hYEGSTVPEK.[K]               | N-Term(iTRAQ4plex); K10(iTRAQ4plex)      | 1 | 1 |
| [K].YVMPLVADQDQcIR.[H]           | C12(Carbamidomethyl)                     | 1 | 1 |
| [R].vGYVSGWGR.[N]                |                                          | 1 | 1 |
| [K].gSFPWQak.[M]                 | N-Term(iTRAQ4plex); K8(iTRAQ4plex)       | 2 | 2 |
| [R].vGYVSGWGR.[N]                | N-Term(iTRAQ4plex)                       | 1 | 1 |
| [R].tEGDGVYTLNDk.[K]             | N-Term(iTRAQ4plex); K12(iTRAQ4plex)      | 2 | 2 |
| [R].vGYVSGWGR.[N]                | N-Term(iTRAQ4plex)                       | 1 | 1 |
| [R].hYEGSTVPEK.[K]               | N-Term(iTRAQ4plex); K10(iTRAQ4plex)      | 1 | 1 |
| [R].vmPicLPSk.[ND]               | N-Term(iTRAQ4plex); M2(Oxidation)        | 2 | 2 |
| [K].yVMPLVADQDQcIR.[H]           | N-Term(iTRAQ4plex); C12(Carbamidomethyl) | 1 | 1 |
| [K].yVMPLVADQDQcIR.[H]           | N-Term(iTRAQ4plex); C12(Carbamidomethyl) | 1 | 1 |
| [R].tEGDGVYTLNNEk.[Q]            | N-Term(iTRAQ4plex); K13(iTRAQ4plex)      | 1 | 1 |
| [K].vVLHPNYSQVDIGLIK.[L]         | N-Term(iTRAQ4plex); K16(iTRAQ4plex)      | 1 | 1 |
| [K].vVLHPNYSQVDIGLIK.[L]         | N-Term(iTRAQ4plex); K16(iTRAQ4plex)      | 1 | 1 |
| [K].VTSIQDWVQk.[T]               | K10(iTRAQ4plex)                          | 1 | 1 |
| [K].YVMPLVADQDQcIR.[H]           | C12(Carbamidomethyl)                     | 1 | 1 |
| [R].hYEGSTVPEKk.[T]              | N-Term(iTRAQ4plex); K10(iTRAQ4plex)      | 1 | 1 |
| [K].vVLHPNYSQVDIGLIK.[L]         | N-Term(iTRAQ4plex); K16(iTRAQ4plex)      | 1 | 1 |
| [K].yVmLPVADQDQcIR.[H]           | N-Term(iTRAQ4plex); M3(Oxidation)        | 1 | 1 |
| [R].tEGDGVYTLNNEk.[Q]            | N-Term(iTRAQ4plex); K13(iTRAQ4plex)      | 1 | 1 |
| [K].qLVEIEk.[V]                  | N-Term(iTRAQ4plex); K7(iTRAQ4plex)       | 2 | 2 |
| [R].GGSGGSYGGGGSGGGYGGGGSGSR.[G] |                                          | 1 | 1 |
| [R].SGGGGGGGLGSGGSIR.[S]         |                                          | 1 | 1 |
| [R].FSSSSGYGGGSSR.[V]            |                                          | 1 | 1 |

|                               |                                |   |   |
|-------------------------------|--------------------------------|---|---|
| [K].vQALEEANNDLENk.[I]        | N-Term(iTRAQ4plex); K14(iTRAQ4 | 1 | 1 |
| [R].sGGGGGGGLGSGGSIR.[S]      | N-Term(iTRAQ4plex)             | 1 | 1 |
| [R].fSSSSGYGGGSSR.[V]         | N-Term(iTRAQ4plex)             | 1 | 1 |
| [K].tLLDIDNTR.[M]             | N-Term(iTRAQ4plex)             | 1 | 1 |
| [R].qEYEQLIAk.[N]             | N-Term(iTRAQ4plex); K9(iTRAQ4  | 1 | 1 |
| [R].fSSSGGGGGGR.[F]           | N-Term(iTRAQ4plex)             | 1 | 1 |
| [R].qVLDNLTmEk.[S]            | N-Term(iTRAQ4plex); M8(Oxidati | 1 | 1 |
| [K].fEMEQNLR.[Q]              | N-Term(iTRAQ4plex)             | 1 | 1 |
| [K].STmQELNSR.[L]             | M3(Oxidation)                  | 1 | 1 |
| [R].SGGGGGGLGSGGSIR.[S]       |                                | 1 | 1 |
| [R].FSSSSGYGGGSSR.[V]         |                                | 1 | 1 |
| [R].mTLDDFR.[I]               | N-Term(iTRAQ4plex)             | 1 | 1 |
| [K].STMQELNSR.[L]             |                                | 1 | 1 |
| [R].sLVNLGGSk.[S]             | N-Term(iTRAQ4plex); K9(iTRAQ4  | 1 | 1 |
| [K].wELLQQVDTSTR.[T]          | N-Term(iTRAQ4plex)             | 1 | 1 |
| [K].wELLQQVDTSTR.[T]          | N-Term(iTRAQ4plex)             | 1 | 1 |
| [R].fLEQQNQVLQTK.[W]          | N-Term(iTRAQ4plex); K12(iTRAQ  | 2 | 3 |
| [R].sLDLDSIIAEVk.[A]          | N-Term(iTRAQ4plex); K12(iTRAQ  | 1 | 1 |
| [R].tNAENEFVTIk.[K]           | N-Term(iTRAQ4plex); K11(iTRAQ  | 1 | 1 |
| [R].tLLEGEESR.[M]             | N-Term(iTRAQ4plex)             | 1 | 1 |
| [R].sLVNLGGSk.[S]             | N-Term(iTRAQ4plex); K9(iTRAQ4  | 1 | 1 |
| [R].tLLEGEESR.[M]             | N-Term(iTRAQ4plex)             | 1 | 1 |
| [R].tLLEGEESR.[M]             | N-Term(iTRAQ4plex)             | 1 | 1 |
| [K].wELLQQVDTSTR.[T]          | N-Term(iTRAQ4plex)             | 1 | 1 |
| [K].dVDGAYMTk.[V]             | N-Term(iTRAQ4plex); K9(iTRAQ4  | 1 | 1 |
| [R].TLLEGEESR.[M]             |                                | 1 | 1 |
| [R].fSScGGGGGSGFAGGGFGSR.[S]  | N-Term(iTRAQ4plex); C4(Carbam  | 1 | 1 |
| [K].aQYEDIAQk.[S]             | N-Term(iTRAQ4plex); K9(iTRAQ4  | 1 | 1 |
| [K].sISISVAR.[G]              | N-Term(iTRAQ4plex)             | 1 | 1 |
| [R].sEIDNVk.[K]               | N-Term(iTRAQ4plex); K7(iTRAQ4  | 1 | 1 |
| [K].sLNNQFASFIDk.[V]          | N-Term(iTRAQ4plex); K12(iTRAQ  | 1 | 1 |
| [K].dVDGAYMTk.[V]             | N-Term(iTRAQ4plex); K9(iTRAQ4  | 1 | 1 |
| [R].FLEQQNQVLQTK.[W]          | K12(iTRAQ4plex)                | 2 | 3 |
| [K].wcATTHNYDR.[D]            | N-Term(iTRAQ4plex); C2(Carbam  | 1 | 1 |
| [R].sQFVQPIcLPEPGSTFPAGHK.[C] | N-Term(iTRAQ4plex); C8(Carbam  | 1 | 1 |
| [R].kWcATTHNYDR.[D]           | N-Term(iTRAQ4plex); K1(iTRAQ4  | 1 | 1 |
| [R].mLHAcTSEGSAGR.[K]         | N-Term(iTRAQ4plex); C5(Carbam  | 1 | 1 |
| [R].vQLSPDLLATLPEPASPGR.[Q]   | N-Term(iTRAQ4plex)             | 1 | 1 |
| [R].tTDVTQTFGIEk.[Y]          | N-Term(iTRAQ4plex); K12(iTRAQ  | 1 | 1 |
| [K].wcATTHNYDR.[D]            | N-Term(iTRAQ4plex); C2(Carbam  | 1 | 1 |
| [K].sDAcQGDSGGPLAcEk.[N]      | N-Term(iTRAQ4plex); C4(Carbam  | 1 | 1 |
| [R].sQFVQPIcLPEPGSTFPAGHK.[C] | N-Term(iTRAQ4plex); C8(Carbam  | 1 | 1 |
| [R].qGHVEQcEcFGGR.[T]         | N-Term(iTRAQ4plex); C7(Carbam  | 1 | 1 |
| [K].sDAcQGDSGGPLAcEk.[N]      | N-Term(iTRAQ4plex); C4(Carbam  | 1 | 1 |
| [R].lcNIEPDER.[C]             | N-Term(iTRAQ4plex); C2(Carbam  | 1 | 1 |
| [R].nPNDERPWcYVvk.[D]         | N-Term(iTRAQ4plex); C10(Carbar | 1 | 1 |
| [R].lcNIEPDER.[C]             | N-Term(iTRAQ4plex); C2(Carbam  | 1 | 1 |
| [R].yEYLEGGDR.[W]             | N-Term(iTRAQ4plex)             | 1 | 1 |
| [R].lcNIEPDER.[C]             | N-Term(iTRAQ4plex); C2(Carbam  | 1 | 1 |
| [K].sDAcQGDSGGPLAcEk.[N]      | N-Term(iTRAQ4plex); C4(Carbam  | 1 | 1 |
| [K].aLSGFSLQScR.[H]           | N-Term(iTRAQ4plex); C10(Carbar | 1 | 1 |
| [R].nVIYTDcWVTGWGYR.[K]       | N-Term(iTRAQ4plex); C7(Carbam  | 1 | 1 |



|                                     |                                     |   |   |
|-------------------------------------|-------------------------------------|---|---|
| [K].aLGISPFHEHAEEVFTANDSGPR.[R]     | N-Term(iTRAQ4plex)                  | 1 | 1 |
| [K].aLGISPFHEHAEEVFTANDSGPR.[R]     | N-Term(iTRAQ4plex)                  | 1 | 1 |
| [K].aLGISPFHEHAEEVFTANDSGPR.[R]     | N-Term(iTRAQ4plex)                  | 1 | 1 |
| [K].aLGISPFHEHAEEVFTANDSGPR.[R]     | N-Term(iTRAQ4plex)                  | 1 | 1 |
| [K].aLGISPFHEHAEEVFTANDSGPRR.[Y]    | N-Term(iTRAQ4plex)                  | 1 | 1 |
| [K].aADDTWEPFASGk.[T]               | N-Term(iTRAQ4plex); K13(iTRAQ4plex) | 1 | 1 |
| [R].yTIAALLSPYSYSTTAVVTNPkE.[-]     | N-Term(iTRAQ4plex); K22(iTRAQ4plex) | 1 | 1 |
| [K].aADDTWEPFASGk.[T]               | N-Term(iTRAQ4plex); K13(iTRAQ4plex) | 1 | 1 |
| [K].aADDTWEPFASGk.[T]               | N-Term(iTRAQ4plex); K13(iTRAQ4plex) | 1 | 1 |
| [R].rYTIAALLSPYSYSTTAVVTNPkE.[-]    | N-Term(iTRAQ4plex); K23(iTRAQ4plex) | 1 | 1 |
| [R].yTIAALLSPYSYSTTAVVTNPkE.[-]     | N-Term(iTRAQ4plex); K22(iTRAQ4plex) | 1 | 1 |
| [R].yTIAALLSPYSYSTTAVVTNPkE.[E]     | N-Term(iTRAQ4plex); K22(iTRAQ4plex) | 1 | 1 |
| [R].YTIAALLSPYSYSTTAVVTNPkE.[-]     | K22(iTRAQ4plex)                     | 1 | 1 |
| [R].YTIAALLSPYSYSTTAVVTNPkE.[-]     | K22(iTRAQ4plex)                     | 1 | 1 |
| [K].tSESGELHGLTTEEFVEGIYk.[V]       | N-Term(iTRAQ4plex); K22(iTRAQ4plex) | 1 | 1 |
| [R].RYTIAALLSPYSYSTTAVVTNPkE.[-]    | K23(iTRAQ4plex)                     | 1 | 1 |
| [R].rYTIAALLSPYSYSTTAVVTNPkE.[-]    | N-Term(iTRAQ4plex); K23(iTRAQ4plex) | 1 | 1 |
| [R].rYTIAALLSPYSYSTTAVVTNPkE.[-]    | N-Term(iTRAQ4plex); K23(iTRAQ4plex) | 1 | 1 |
| [R].rYTIAALLSPYSYSTTAVVTNPkE.[E]    | N-Term(iTRAQ4plex); K23(iTRAQ4plex) | 1 | 1 |
| [R].kaADDTWEPFASGk.[T]              | N-Term(iTRAQ4plex); K14(iTRAQ4plex) | 1 | 1 |
| [R].kaADDTWEPFASGk.[T]              | K1(iTRAQ4plex); K14(iTRAQ4plex)     | 1 | 1 |
| [R].kaADDTWEPFASGk.[T]              | N-Term(iTRAQ4plex); K1(iTRAQ4plex)  | 1 | 1 |
| [R].kaADDTWEPFASGk.[T]              | N-Term(iTRAQ4plex); K1(iTRAQ4plex)  | 1 | 1 |
| [R].kaADDTWEPFASGk.[T]              | N-Term(iTRAQ4plex); K1(iTRAQ4plex)  | 1 | 1 |
| [R].kaADDTWEPFASGk.[T]              | N-Term(iTRAQ4plex); K1(iTRAQ4plex)  | 1 | 1 |
| [K].aADDTWEPFASGk.[T]               | N-Term(iTRAQ4plex); K13(iTRAQ4plex) | 1 | 1 |
| [K].aADDTWEPFASGk.[T]               | N-Term(iTRAQ4plex); K13(iTRAQ4plex) | 1 | 1 |
| [R].rYTIAALLSPYSYSTTAVVTNPkE.[-]    | N-Term(iTRAQ4plex); K23(iTRAQ4plex) | 1 | 1 |
| [K].tSESGELHGLTTEEFVEGIYk.[V]       | N-Term(iTRAQ4plex); K22(iTRAQ4plex) | 1 | 1 |
| [R].yTIAALLSPYSYSTTAVVTNPkE.[-]     | N-Term(iTRAQ4plex); K22(iTRAQ4plex) | 1 | 1 |
| [R].GSPAINVAVHVFRk.[A]              | K14(iTRAQ4plex)                     | 1 | 1 |
| [R].RYTIAALLSPYSYSTTAVVTNPkE.[-]    | K23(iTRAQ4plex)                     | 1 | 1 |
| [R].RYTIAALLSPYSYSTTAVVTNPkE.[-]    | K23(iTRAQ4plex)                     | 1 | 1 |
| [R].GSPAINVAVHVFRk.[A]              |                                     | 1 | 1 |
| [R].gSPAINVAVHVFRk.[A]              | N-Term(iTRAQ4plex); K14(iTRAQ4plex) | 1 | 1 |
| [K].aLGISPFHEHAEEVFTANDSGPR.[R]     | N-Term(iTRAQ4plex)                  | 1 | 1 |
| [R].gSPAINVAVHVFR.[K]               | N-Term(iTRAQ4plex)                  | 1 | 1 |
| [R].gSPAINVAVHVFR.[K]               | N-Term(iTRAQ4plex)                  | 1 | 1 |
| [R].GSPAINVAVHVFRkaADDTWEPFASGk.[T] | K14(iTRAQ4plex); K27(iTRAQ4plex)    | 1 | 1 |
| [K].AADDTWEPFASGk.[T]               | K13(iTRAQ4plex)                     | 1 | 1 |
| [R].gSPAINVAVHVFR.[K]               | N-Term(iTRAQ4plex)                  | 1 | 1 |
| [R].gSPAINVAVHVFR.[K]               | N-Term(iTRAQ4plex)                  | 1 | 1 |
| [K].aLGISPFHEHAEEVFTANDSGPR.[R]     | N-Term(iTRAQ4plex)                  | 1 | 1 |
| [R].yTIAALLSPYSYSTTAVVTNPkE.[-]     | N-Term(iTRAQ4plex); K22(iTRAQ4plex) | 1 | 1 |
| [R].rYTIAALLSPYSYSTTAVVTNPkE.[E]    | N-Term(iTRAQ4plex); K23(iTRAQ4plex) | 1 | 1 |
| [K].aLGISPFHEHAEEVFTANDSGPRR.[Y]    | N-Term(iTRAQ4plex)                  | 1 | 1 |
| [K].aLGISPFHEHAEEVFTANDSGPR.[R]     | N-Term(iTRAQ4plex)                  | 1 | 1 |
| [R].kGVceETSGAYEk.[T]               | N-Term(iTRAQ4plex); K1(iTRAQ4plex)  | 1 | 1 |
| [R].TVAAcNLPIVR.[G]                 | C5(Carbamidomethyl)                 | 1 | 1 |
| [R].TVAAcNLPIVR.[G]                 | C5(Carbamidomethyl)                 | 1 | 1 |
| [R].kGVceETSGAYEk.[T]               | N-Term(iTRAQ4plex); K1(iTRAQ4plex)  | 1 | 1 |
| [R].TVAAcNLPIVR.[G]                 | C5(Carbamidomethyl)                 | 1 | 1 |

|                                 |                                |   |   |
|---------------------------------|--------------------------------|---|---|
| [R].tVAAcNLPIVR.[G]             | N-Term(iTRAQ4plex); C5(Carbam  | 1 | 1 |
| [R].tVAAcNLPIVR.[G]             | N-Term(iTRAQ4plex); C5(Carbam  | 1 | 1 |
| [R].tVAAcNLPIVR.[G]             | N-Term(iTRAQ4plex); C5(Carbam  | 1 | 1 |
| [R].tVAAcNLPIVR.[G]             | N-Term(iTRAQ4plex); C5(Carbam  | 1 | 1 |
| [R].vVAQGVGIPEDSIFTMADR.[G]     | N-Term(iTRAQ4plex)             | 1 | 1 |
| [R].mTVSTLVLGEGATEAEISMTSTR.[W] | N-Term(iTRAQ4plex)             | 1 | 1 |
| [R].mTVSTLVLGEGATEAEISMTSTR.[W] | N-Term(iTRAQ4plex)             | 1 | 1 |
| [R].vVAQGVGIPEDSIFTmADR.[G]     | N-Term(iTRAQ4plex); M16(Oxida  | 1 | 1 |
| [R].vVAQGVGIPEDSIFTmADR.[G]     | N-Term(iTRAQ4plex); M16(Oxida  | 1 | 1 |
| [R].eYcGVPGDGDEELLR.[F]         | N-Term(iTRAQ4plex); C3(Carbam  | 1 | 1 |
| [R].eYcGVPGDGDEELLR.[F]         | N-Term(iTRAQ4plex); C3(Carbam  | 1 | 1 |
| [R].gEcVPGEQEPELIPR.[V]         | N-Term(iTRAQ4plex); C3(Carbam  | 1 | 1 |
| [R].gEcVPGEQEPELIPR.[V]         | N-Term(iTRAQ4plex); C3(Carbam  | 1 | 1 |
| [R].gEcVPGEQEPELIPR.[V]         | N-Term(iTRAQ4plex); C3(Carbam  | 1 | 1 |
| [R].hHGPTITak.[L]               | N-Term(iTRAQ4plex); K9(iTRAQ4  | 1 | 1 |
| [R].hHGPTITak.[L]               | N-Term(iTRAQ4plex); K9(iTRAQ4  | 1 | 1 |
| [R].hHGPTITak.[L]               | N-Term(iTRAQ4plex); K9(iTRAQ4  | 1 | 1 |
| [R].hHGPTITak.[L]               | N-Term(iTRAQ4plex); K9(iTRAQ4  | 1 | 1 |
| [R].eYcGVPGDGDEELLR.[F]         | N-Term(iTRAQ4plex); C3(Carbam  | 1 | 1 |
| [R].eYcGVPGDGDEELLR.[F]         | N-Term(iTRAQ4plex); C3(Carbam  | 1 | 1 |
| [R].eYcGVPGDGDEELLR.[F]         | N-Term(iTRAQ4plex); C3(Carbam  | 1 | 1 |
| [R].eYcGVPGDGDEELLR.[F]         | N-Term(iTRAQ4plex); C3(Carbam  | 1 | 1 |
| [R].eYcGVPGDGDEELLR.[F]         | N-Term(iTRAQ4plex); C3(Carbam  | 1 | 1 |
| [K].wYNLAIGSTcPWLk.[K]          | N-Term(iTRAQ4plex); C10(Carbar | 1 | 1 |
| [R].eYcGVPGDGDEELLR.[F]         | N-Term(iTRAQ4plex); C3(Carbam  | 1 | 1 |
| [R].eYcGVPGDGDEELLR.[F]         | N-Term(iTRAQ4plex); C3(Carbam  | 1 | 1 |
| [R].eYcGVPGDGDEELLR.[F]         | N-Term(iTRAQ4plex); C3(Carbam  | 1 | 1 |
| [R].eYcGVPGDGDEELLR.[F]         | N-Term(iTRAQ4plex); C3(Carbam  | 1 | 1 |
| [R].eYcGVPGDGDEELLR.[F]         | N-Term(iTRAQ4plex); C3(Carbam  | 1 | 1 |
| [R].eYcGVPGDGDEELLR.[F]         | N-Term(iTRAQ4plex); C3(Carbam  | 1 | 1 |
| [R].eYcGVPGDGDEELLR.[F]         | N-Term(iTRAQ4plex); C3(Carbam  | 1 | 1 |
| [R].eYcGVPGDGDEELLR.[F]         | N-Term(iTRAQ4plex); C3(Carbam  | 1 | 1 |
| [R].eYcGVPGDGDEELLR.[F]         | N-Term(iTRAQ4plex); C3(Carbam  | 1 | 1 |
| [R].eYcGVPGDGDEELLR.[F]         | N-Term(iTRAQ4plex); C3(Carbam  | 1 | 1 |
| [R].eYcGVPGDGDEELLR.[F]         | N-Term(iTRAQ4plex); C3(Carbam  | 1 | 1 |
| [R].kGVcEETSGAYEk.[T]           | N-Term(iTRAQ4plex); K1(iTRAQ4  | 1 | 1 |
| [R].kGVcEETSGAYEk.[T]           | N-Term(iTRAQ4plex); K1(iTRAQ4  | 1 | 1 |
| [R].kGVcEETSGAYEk.[T]           | N-Term(iTRAQ4plex); K1(iTRAQ4  | 1 | 1 |
| [R].eYcGVPGDGDEELLR.[F]         | N-Term(iTRAQ4plex); C3(Carbam  | 1 | 1 |
| [R].eYcGVPGDGDEELLR.[F]         | N-Term(iTRAQ4plex); C3(Carbam  | 1 | 1 |
| [R].EYcGVPGDGDEELLR.[F]         | C3(Carbamidomethyl)            | 1 | 1 |
| [K].kEDScQLGYSAGPcMGMTSR.[Y]    | N-Term(iTRAQ4plex); K1(iTRAQ4  | 1 | 1 |
| [K].kEDScQLGYSAGPcMGMTSR.[Y]    | N-Term(iTRAQ4plex); K1(iTRAQ4  | 1 | 1 |
| [K].gVcEETSGAYEk.[T]            | N-Term(iTRAQ4plex); C3(Carbam  | 1 | 1 |
| [R].aFIQLWAFDAVk.[G]            | N-Term(iTRAQ4plex); K12(iTRAQ  | 1 | 1 |
| [R].aFIQLWAFDAVk.[G]            | N-Term(iTRAQ4plex); K12(iTRAQ  | 1 | 1 |
| [R].hHGPTITak.[L]               | N-Term(iTRAQ4plex); K9(iTRAQ4  | 1 | 1 |
| [R].TVAAcNLPIVR.[G]             | C5(Carbamidomethyl)            | 1 | 1 |
| [R].hHGPTITak.[L]               | N-Term(iTRAQ4plex); K9(iTRAQ4  | 1 | 1 |
| [R].eYcGVPGDGDEELLR.[F]         | N-Term(iTRAQ4plex); C3(Carbam  | 1 | 1 |
| [R].vVAQGVGIPEDSIFTMADR.[G]     | N-Term(iTRAQ4plex)             | 1 | 1 |
| [K].wYNLAIGSTcPWLk.[K]          | N-Term(iTRAQ4plex); C10(Carbar | 1 | 1 |
| [R].vVAQGVGIPEDSIFTMADR.[G]     | N-Term(iTRAQ4plex)             | 1 | 1 |
| [R].AFIQLWAFDAVk.[G]            | K12(iTRAQ4plex)                | 1 | 1 |
| [R].eYcGVPGDGDEELLR.[F]         | N-Term(iTRAQ4plex); C3(Carbam  | 1 | 1 |
| [K].gVcEETSGAYEk.[T]            | N-Term(iTRAQ4plex); C3(Carbam  | 1 | 1 |
| [R].kGVcEETSGAYEk.[T]           | N-Term(iTRAQ4plex); K1(iTRAQ4  | 1 | 1 |
| [R].TVAAcNLPIVR.[G]             | C5(Carbamidomethyl)            | 1 | 1 |

|                                    |                                |   |   |
|------------------------------------|--------------------------------|---|---|
| [R].eTLLQDFR.[V]                   | N-Term(iTRAQ4plex)             | 1 | 1 |
| [K].kEDScQLGYSAGPcMGMTSR.[Y]       | N-Term(iTRAQ4plex); K1(iTRAQ4  | 1 | 1 |
| [R].eYcGVPGDGDEELLR.[F]            | N-Term(iTRAQ4plex); C3(Carbam  | 1 | 1 |
| [R].hHGPTITak.[L]                  | N-Term(iTRAQ4plex); K9(iTRAQ4  | 1 | 1 |
| [R].tVAAcNLPIVR.[G]                | N-Term(iTRAQ4plex); C5(Carbam  | 1 | 1 |
| [R].vVAQGVGIPEDSIFTMADR.[G]        | N-Term(iTRAQ4plex)             | 1 | 1 |
| [R].GEcVPGEQEPEPILIPR.[V]          | C3(Carbamidomethyl)            | 1 | 1 |
| [K].wYNLAIGSTcPWLk.[K]             | N-Term(iTRAQ4plex); C10(Carbar | 1 | 1 |
| [R].gEcVPGEQEPEPILIPR.[V]          | N-Term(iTRAQ4plex); C3(Carbam  | 1 | 1 |
| [R].mTVSTLVLGEGATEAEISMTSTR.[W]    | N-Term(iTRAQ4plex)             | 1 | 1 |
| [R].tVAAcNLPIVR.[G]                | N-Term(iTRAQ4plex); C5(Carbam  | 1 | 1 |
| [R].gEcVPGEQEPEPILIPR.[V]          | N-Term(iTRAQ4plex); C3(Carbam  | 1 | 1 |
| [R].GEcVPGEQEPEPILIPR.[V]          | C3(Carbamidomethyl)            | 1 | 1 |
| [K].aMAVEDIISR.[V]                 | N-Term(iTRAQ4plex)             | 1 | 1 |
| [K].iNVGGGLSGDHck.[K]              | N-Term(iTRAQ4plex); C12(Carbar | 1 | 1 |
| [K].mESLGITSR.[D]                  | N-Term(iTRAQ4plex)             | 1 | 1 |
| [K].amAVEDIISR.[V]                 | N-Term(iTRAQ4plex); M2(Oxidati | 1 | 1 |
| [K].iNVGGGLSGDHck.[K]              | N-Term(iTRAQ4plex); C12(Carbar | 1 | 1 |
| [R].kPYNFLk.[Y]                    | N-Term(iTRAQ4plex); K1(iTRAQ4  | 1 | 1 |
| [K].fGGTlcSGDIWDQAScSSSTTcVR.[Q]   | N-Term(iTRAQ4plex); C6(Carbam  | 1 | 1 |
| [K].yNPVVIDFEMQPIHEVLR.[H]         | N-Term(iTRAQ4plex)             | 1 | 1 |
| [K].yNPVVIDFEMQPIHEVLR.[H]         | N-Term(iTRAQ4plex)             | 1 | 1 |
| [R].aIDEDcSQYEPIPGSQk.[A]          | N-Term(iTRAQ4plex); C6(Carbam  | 1 | 1 |
| [R].aIDEDcSQYEPIPGSQk.[A]          | N-Term(iTRAQ4plex); C6(Carbam  | 1 | 1 |
| [R].qAQcGQDFQck.[E]                | N-Term(iTRAQ4plex); C4(Carbam  | 1 | 1 |
| [R].aIDEDcSQYEPIPGSQk.[A]          | N-Term(iTRAQ4plex); C6(Carbam  | 1 | 1 |
| [R].IYYGDDEk.[Y]                   | N-Term(iTRAQ4plex); K8(iTRAQ4  | 1 | 1 |
| [R].IGSLGAAcEQTQTEGak.[A]          | N-Term(iTRAQ4plex); C8(Carbam  | 1 | 1 |
| [R].hTSLGPLEAK.[R]                 | N-Term(iTRAQ4plex); K10(iTRAQ  | 1 | 1 |
| [K].iNVGGGLSGDHck.[K]              | C12(Carbamidomethyl); K13(iTR  | 1 | 1 |
| [K].fGGTlcSGDIWDQAScSSSTTcVR.[Q]   | N-Term(iTRAQ4plex); C6(Carbam  | 1 | 1 |
| [K].aMAVEDIISR.[V]                 | N-Term(iTRAQ4plex)             | 1 | 1 |
| [K].mESLGITSR.[D]                  | N-Term(iTRAQ4plex)             | 1 | 1 |
| [R].kPYNFLk.[Y]                    | N-Term(iTRAQ4plex); K1(iTRAQ4  | 1 | 1 |
| [K].vQTAHFk.[M]                    | N-Term(iTRAQ4plex); K7(iTRAQ4  | 1 | 1 |
| [R].hTSLGPLEAK.[R]                 | N-Term(iTRAQ4plex); K10(iTRAQ  | 1 | 1 |
| [R].aIDEDcSQYEPIPGSQk.[A]          | N-Term(iTRAQ4plex); C6(Carbam  | 1 | 1 |
| [R].AIDEDcSQYEPIPGSQk.[A]          | C6(Carbamidomethyl); K17(iTRA  | 1 | 1 |
| [R].IGSLGAAcEQTQTEGak.[A]          | N-Term(iTRAQ4plex); C8(Carbam  | 1 | 1 |
| [K].aQYVLISPEASSR.[F]              | N-Term(iTRAQ4plex)             | 1 | 1 |
| [K].vAFLTvtLHQGGATR.[M]            | N-Term(iTRAQ4plex)             | 1 | 1 |
| [R].tMFIGGSQLSQk.[H]               | N-Term(iTRAQ4plex); K12(iTRAQ  | 1 | 1 |
| [K].gIvAAFYSGPSLSDk.[E]            | N-Term(iTRAQ4plex); K15(iTRAQ  | 1 | 1 |
| [K].gAVVYVFGSk.[Q]                 | N-Term(iTRAQ4plex); K10(iTRAQ  | 1 | 1 |
| [R].eLlLEHQDAYQAGIVFPDcFYPSIck.[G] | N-Term(iTRAQ4plex); C19(Carbar | 1 | 1 |
| [K].eTTLGDMTGk.[C]                 | N-Term(iTRAQ4plex); K10(iTRAQ  | 1 | 1 |
| [R].iLEGFQPSGR.[F]                 | N-Term(iTRAQ4plex)             | 1 | 1 |
| [K].sWITPcPEEK.[A]                 | N-Term(iTRAQ4plex); C6(Carbam  | 1 | 1 |
| [R].iLEGFQPSGR.[F]                 | N-Term(iTRAQ4plex)             | 1 | 1 |
| [K].gAVVYVFGSk.[Q]                 | N-Term(iTRAQ4plex); K10(iTRAQ  | 1 | 1 |
| [K].qVLLVGAPTYDDVSk.[V]            | N-Term(iTRAQ4plex); K15(iTRAQ  | 1 | 1 |
| [R].eNYPLPWEk.[D]                  | N-Term(iTRAQ4plex); K9(iTRAQ4  | 1 | 1 |



|                                    |                                |   |   |
|------------------------------------|--------------------------------|---|---|
| [R].iADVTSGLIGGEDGR.[V]            | N-Term(iTRAQ4plex)             | 1 | 1 |
| [K].sWITPcPEEK.[A]                 | N-Term(iTRAQ4plex); C6(Carbam  | 1 | 1 |
| [K].qVLLVGAPTYDDVsk.[V]            | N-Term(iTRAQ4plex); K15(iTRAQ  | 1 | 1 |
| [R].gWHWVGAHTLGHNSR.[G]            | N-Term(iTRAQ4plex)             | 1 | 1 |
| [R].gWHWVGAHTLGHNSR.[G]            | N-Term(iTRAQ4plex)             | 1 | 1 |
| [R].hTASAWLMSAPNSGPHNR.[L]         | N-Term(iTRAQ4plex)             | 1 | 1 |
| [R].hTASAWLMSAPNSGPHNR.[L]         | N-Term(iTRAQ4plex)             | 1 | 1 |
| [R].aGLLRPDYALLGHR.[Q]             | N-Term(iTRAQ4plex)             | 1 | 1 |
| [R].aGLLRPDYALLGHR.[Q]             | N-Term(iTRAQ4plex)             | 1 | 1 |
| [R].aGLLRPDYALLGHR.[Q]             | N-Term(iTRAQ4plex)             | 1 | 1 |
| [R].aGLLRPDYALLGHR.[Q]             | N-Term(iTRAQ4plex)             | 1 | 1 |
| [R].TDcPGDALFDLLR.[T]              | C3(Carbamidomethyl)            | 1 | 1 |
| [R].tDcPGDALFDLLR.[T]              | N-Term(iTRAQ4plex); C3(Carbam  | 1 | 1 |
| [K].eFTEAFLGcPAIHPR.[C]            | N-Term(iTRAQ4plex); C9(Carbam  | 1 | 1 |
| [K].eFTEAFLGcPAIHPR.[C]            | N-Term(iTRAQ4plex); C9(Carbam  | 1 | 1 |
| [K].gcPDVQASLPDAk.[A]              | N-Term(iTRAQ4plex); C2(Carbam  | 1 | 1 |
| [K].gcPDVQASLPDAk.[A]              | N-Term(iTRAQ4plex); C2(Carbam  | 1 | 1 |
| [K].gcPDVQASLPDAk.[A]              | N-Term(iTRAQ4plex); C2(Carbam  | 1 | 1 |
| [R].dTLPScAVR.[A]                  | N-Term(iTRAQ4plex); C6(Carbam  | 1 | 1 |
| [K].ILQLPLGFLYVHHTYVPAPPcTDFTR.[C] | N-Term(iTRAQ4plex); C21(Carbar | 1 | 1 |
| [K].ILQLPLGFLYVHHTYVPAPPcTDFTR.[C] | N-Term(iTRAQ4plex); C21(Carbar | 1 | 1 |
| [R].vINLPLDSMAAPWETGDTFPDVVAIAPDV  | N-Term(iTRAQ4plex)             | 1 | 1 |
| [R].vINLPLDSMAAPWETGDTFPDVVAIAPDV  | N-Term(iTRAQ4plex)             | 1 | 1 |
| [K].eYGVVLAPDGSTVAVEPLLAGLEAGLQGR. | N-Term(iTRAQ4plex)             | 1 | 1 |
| [R].gSQTQSHPDLGTEGcWDQLSAPR.[T]    | N-Term(iTRAQ4plex); C15(Carbar | 1 | 1 |
| [R].gSQTQSHPDLGTEGcWDQLSAPR.[T]    | N-Term(iTRAQ4plex); C15(Carbar | 1 | 1 |
| [R].GSQTQSHPDLGTEGcWDQLSAPR.[T]    | C15(Carbamidomethyl)           | 1 | 1 |
| [K].gcPDVQASLPDAk.[A]              | N-Term(iTRAQ4plex); C2(Carbam  | 1 | 1 |
| [K].eFTEAFLGcPAIHPR.[C]            | N-Term(iTRAQ4plex); C9(Carbam  | 1 | 1 |
| [R].AGLLRPDYALLGHR.[Q]             |                                | 1 | 1 |
| [R].tFTLLDPk.[A]                   | N-Term(iTRAQ4plex); K8(iTRAQ4  | 1 | 1 |
| [R].dGSPDVTADIGANTPDATk.[G]        | N-Term(iTRAQ4plex); K20(iTRAQ  | 1 | 1 |
| [R].GSQTQSHPDLGTEGcWDQLSAPR.[T]    | C15(Carbamidomethyl)           | 1 | 1 |
| [R].TFTLLDPk.[A]                   | K8(iTRAQ4plex)                 | 1 | 1 |
| [R].dGSPDVTADIGANTPDATk.[G]        | N-Term(iTRAQ4plex); K20(iTRAQ  | 1 | 1 |
| [R].hTASAWLMSAPNSGPHNR.[L]         | N-Term(iTRAQ4plex)             | 1 | 1 |
| [K].eFTEAFLGcPAIHPR.[C]            | N-Term(iTRAQ4plex); C9(Carbam  | 1 | 1 |
| [K].eFTEAFLGcPAIHPR.[C]            | N-Term(iTRAQ4plex); C9(Carbam  | 1 | 1 |
| [R].dGSPDVTADIGANTPDATk.[G]        | N-Term(iTRAQ4plex); K20(iTRAQ  | 1 | 1 |
| [R].tFTLLDPk.[A]                   | N-Term(iTRAQ4plex); K8(iTRAQ4  | 1 | 1 |
| [R].AGLLRPDYALLGHR.[Q]             |                                | 1 | 1 |
| [R].gWHWVGAHTLGHNSR.[G]            | N-Term(iTRAQ4plex)             | 1 | 1 |
| [K].dLLLPQPDLR.[Y]                 | N-Term(iTRAQ4plex)             | 1 | 1 |
| [K].dLLLPQPDLR.[Y]                 | N-Term(iTRAQ4plex)             | 1 | 1 |
| [R].IHLEGNkLQVLGk.[D]              | N-Term(iTRAQ4plex); K7(iTRAQ4  | 1 | 1 |
| [K].aLGHLDSLGNRLR.[K]              | N-Term(iTRAQ4plex)             | 1 | 1 |
| [K].gQTL LAVAK.[S]                 | N-Term(iTRAQ4plex); K9(iTRAQ4  | 1 | 1 |
| [K].aLGHLDSLGNR.[L]                | N-Term(iTRAQ4plex)             | 1 | 1 |
| [K].aLGHLDSLGNR.[L]                | N-Term(iTRAQ4plex)             | 1 | 1 |
| [K].aLGHLDSLGNR.[L]                | N-Term(iTRAQ4plex)             | 1 | 1 |
| [R].VAAGAFQGLR.[Q]                 |                                | 1 | 1 |
| [R].VAAGAFQGLR.[Q]                 | N-Term(iTRAQ4plex)             | 1 | 1 |

|                                |                                |   |   |
|--------------------------------|--------------------------------|---|---|
| [R].vAAGAFQGLR.[Q]             | N-Term(iTRAQ4plex)             | 1 | 1 |
| [R].dGFDISGNPWicDQNLSLYR.[W]   | N-Term(iTRAQ4plex); C12(Carbar | 1 | 1 |
| [R].dGFDISGNPWicDQNLSLYR.[W]   | N-Term(iTRAQ4plex); C12(Carbar | 1 | 1 |
| [R].tLDLGENQLETLPPDLLR.[G]     | N-Term(iTRAQ4plex)             | 1 | 1 |
| [R].tLDLGENQLETLPPDLLR.[G]     | N-Term(iTRAQ4plex)             | 1 | 1 |
| [K].eNQLEVLEVSWLHGLk.[A]       | N-Term(iTRAQ4plex); K16(iTRAQ  | 1 | 1 |
| [K].eNQLEVLEVSWLHGLk.[A]       | N-Term(iTRAQ4plex); K16(iTRAQ  | 1 | 1 |
| [K].eNQLEVLEVSWLHGLk.[A]       | N-Term(iTRAQ4plex); K16(iTRAQ  | 1 | 1 |
| [K].ENQLEVLEVSWLHGLk.[A]       | K16(iTRAQ4plex)                | 1 | 1 |
| [R].cAGPEAVk.[G]               | N-Term(iTRAQ4plex); C1(Carbam  | 1 | 1 |
| [R].nALTGLPPGLFQASATLDTLVk.[E] | N-Term(iTRAQ4plex); K23(iTRAQ  | 1 | 1 |
| [K].dLLLPQPDRL.[Y]             | N-Term(iTRAQ4plex)             | 1 | 1 |
| [K].dLLLPQPDRL.[Y]             | N-Term(iTRAQ4plex)             | 1 | 1 |
| [K].aLGHLDSLGNR.[L]            | N-Term(iTRAQ4plex)             | 1 | 1 |
| [K].gQTLLAVak.[S]              | N-Term(iTRAQ4plex); K9(iTRAQ4  | 1 | 1 |
| [K].dLLLPQPDRL.[Y]             | N-Term(iTRAQ4plex)             | 1 | 1 |
| [K].aLGHLDSLGNR.[L]            | N-Term(iTRAQ4plex)             | 1 | 1 |
| [R].yLFLNGNKLAR.[V]            | N-Term(iTRAQ4plex); K8(iTRAQ4  | 1 | 1 |
| [R].YLFLNGNKLAR.[V]            | K8(iTRAQ4plex)                 | 1 | 1 |
| [K].ALGHLDSLGNR.[L]            |                                | 1 | 1 |
| [R].yLFLNGNk.[L]               | N-Term(iTRAQ4plex); K8(iTRAQ4  | 1 | 1 |
| [R].yLFLNGNk.[L]               | N-Term(iTRAQ4plex); K8(iTRAQ4  | 1 | 1 |
| [R].YLFLNGNKLAR.[V]            | K8(iTRAQ4plex)                 | 1 | 1 |
| [R].rPHFFFPk.[S]               | N-Term(iTRAQ4plex); K8(iTRAQ4  | 1 | 1 |
| [R].rPHFFFPk.[S]               | N-Term(iTRAQ4plex); K8(iTRAQ4  | 1 | 1 |
| [R].rPHFFFPk.[S]               | N-Term(iTRAQ4plex); K8(iTRAQ4  | 1 | 1 |
| [K].tLLSNLEEak.[K]             | N-Term(iTRAQ4plex); K10(iTRAQ  | 1 | 1 |
| [R].kTLLSNLEEak.[K]            | N-Term(iTRAQ4plex); K1(iTRAQ4  | 1 | 1 |
| [K].IFDSDPITVTPVEVSR.[K]       | N-Term(iTRAQ4plex)             | 1 | 1 |
| [K].tLLSNLEEak.[K]             | N-Term(iTRAQ4plex); K10(iTRAQ  | 1 | 1 |
| [R].qQTHMLDVMQDHFSR.[A]        | N-Term(iTRAQ4plex)             | 1 | 1 |
| [R].qQTHMLDVMQDHFSR.[A]        | N-Term(iTRAQ4plex)             | 1 | 1 |
| [R].qQTHMLDVMQDHFSR.[A]        | N-Term(iTRAQ4plex)             | 1 | 1 |
| [R].aSSIIDELFQDR.[F]           | N-Term(iTRAQ4plex)             | 1 | 1 |
| [R].aSSIIDELFQDR.[F]           | N-Term(iTRAQ4plex)             | 1 | 1 |
| [R].eLDESLOVAER.[L]            | N-Term(iTRAQ4plex)             | 1 | 1 |
| [R].eLDESLOVAER.[L]            | N-Term(iTRAQ4plex)             | 1 | 1 |
| [R].eLDESLOVAER.[L]            | N-Term(iTRAQ4plex)             | 1 | 1 |
| [K].TLLSNLEEak.[K]             | K10(iTRAQ4plex)                | 1 | 1 |
| [R].vTTVASHTSDSDVPSGVTEVVk.[L] | N-Term(iTRAQ4plex); K23(iTRAQ  | 1 | 1 |
| [R].iDSLLENDR.[Q]              | N-Term(iTRAQ4plex)             | 1 | 1 |
| [K].tLLSNLEEak.[K]             | N-Term(iTRAQ4plex); K10(iTRAQ  | 1 | 1 |
| [K].fMETVAEK.[A]               | N-Term(iTRAQ4plex); K8(iTRAQ4  | 1 | 1 |
| [K].tLLSNLEEak.[K]             | N-Term(iTRAQ4plex); K10(iTRAQ  | 1 | 1 |
| [R].eILSVDcSTNNPSQAK.[L]       | N-Term(iTRAQ4plex); C7(Carbam  | 1 | 1 |
| [R].rPHFFFPk.[S]               | N-Term(iTRAQ4plex); K8(iTRAQ4  | 1 | 1 |
| [R].eILSVDcSTNNPSQAK.[L]       | N-Term(iTRAQ4plex); C7(Carbam  | 1 | 1 |
| [R].RPHFFFPk.[S]               | K8(iTRAQ4plex)                 | 1 | 1 |
| [R].kTLLSNLEEak.[K]            | N-Term(iTRAQ4plex); K1(iTRAQ4  | 1 | 1 |
| [R].ASSIIDELFQDR.[F]           |                                | 1 | 1 |
| [R].rPHFFFPk.[S]               | N-Term(iTRAQ4plex); K8(iTRAQ4  | 1 | 1 |
| [R].rELDESLOVAER.[L]           | N-Term(iTRAQ4plex)             | 1 | 1 |

|                                     |                                |   |   |
|-------------------------------------|--------------------------------|---|---|
| [R].eILSVDcSTNNPSQAK.[L]            | N-Term(iTRAQ4plex); C7(Carbam  | 1 | 1 |
| [R].IDSLENDR.[Q]                    |                                | 1 | 1 |
| [R].kYNELLK.[S]                     | N-Term(iTRAQ4plex); K1(iTRAQ4  | 1 | 1 |
| [R].ASSIIDELFQDR.[F]                |                                | 1 | 1 |
| [R].aSSIIDELFQDR.[F]                | N-Term(iTRAQ4plex)             | 1 | 1 |
| [R].aSSIIDELFQDR.[F]                | N-Term(iTRAQ4plex)             | 1 | 1 |
| [R].vTTVASHTSDSDVPSGVTEVVVv.[L]     | N-Term(iTRAQ4plex); K23(iTRAQ  | 1 | 1 |
| [R].rLFQPLTHLk.[T]                  | N-Term(iTRAQ4plex); K10(iTRAQ  | 1 | 1 |
| [R].dHLGFQVTWPDEsk.[A]              | N-Term(iTRAQ4plex); K14(iTRAQ  | 1 | 1 |
| [R].dHLGFQVTWPDEsk.[A]              | N-Term(iTRAQ4plex); K14(iTRAQ  | 1 | 1 |
| [R].LFQPLTHLk.[T]                   | K9(iTRAQ4plex)                 | 1 | 1 |
| [R].IFQPLTHLk.[T]                   | N-Term(iTRAQ4plex); K9(iTRAQ4  | 1 | 1 |
| [R].IFQPLTHLk.[T]                   | N-Term(iTRAQ4plex); K9(iTRAQ4  | 1 | 1 |
| [R].sQcTYSNPEGTVVLAcDQAQcR.[W]      | N-Term(iTRAQ4plex); C3(Carbam  | 1 | 1 |
| [R].sLMLSYNATHLPAGIFR.[D]           | N-Term(iTRAQ4plex)             | 1 | 1 |
| [K].ISNNALSGLPQGVFGk.[L]            | N-Term(iTRAQ4plex); K16(iTRAQ  | 1 | 1 |
| [K].vVFLNTQLcQFRPDAFGGLPR.[L]       | N-Term(iTRAQ4plex); C9(Carbam  | 1 | 1 |
| [K].tLNLAQNLLAQLPEELFHPLTSLQTLk.[L] | N-Term(iTRAQ4plex); K27(iTRAQ  | 1 | 1 |
| [K].aGGSWDLAVQER.[A]                | N-Term(iTRAQ4plex)             | 1 | 1 |
| [K].IELLSLsk.[N]                    | N-Term(iTRAQ4plex); K8(iTRAQ4  | 1 | 1 |
| [K].gQVVPALNEk.[Q]                  | N-Term(iTRAQ4plex); K10(iTRAQ  | 1 | 1 |
| [R].dLEELVv.[L]                     | N-Term(iTRAQ4plex); K7(iTRAQ4  | 1 | 1 |
| [R].IFQPLTHLk.[T]                   | N-Term(iTRAQ4plex); K9(iTRAQ4  | 1 | 1 |
| [K].aGGSWDLAVQER.[A]                | N-Term(iTRAQ4plex)             | 1 | 1 |
| [R].ITVSIAR.[A]                     | N-Term(iTRAQ4plex)             | 1 | 1 |
| [R].DLEELVv.[L]                     | K7(iTRAQ4plex)                 | 1 | 1 |
| [K].gQVVPALNEk.[Q]                  | N-Term(iTRAQ4plex); K10(iTRAQ  | 1 | 1 |
| [R].IFQPLTHLk.[T]                   | N-Term(iTRAQ4plex); K9(iTRAQ4  | 1 | 1 |
| [R].wDLQHPHQHPFEPGk.[F]             | N-Term(iTRAQ4plex); K15(iTRAQ  | 1 | 2 |
| [R].wDLQHPHQHPFEPGk.[F]             | N-Term(iTRAQ4plex); K15(iTRAQ  | 1 | 2 |
| [R].wDLQHPHQHPFEPGk.[F]             | N-Term(iTRAQ4plex); K15(iTRAQ  | 1 | 2 |
| [R].vVGGHPGNPWTVSLR.[N]             | N-Term(iTRAQ4plex)             | 1 | 1 |
| [R].wDAQIPHQHR.[F]                  | N-Term(iTRAQ4plex)             | 1 | 1 |
| [R].gTMATTVGGPLPcQAWShk.[F]         | N-Term(iTRAQ4plex); C12(Carbar | 1 | 1 |
| [R].gTELQHLLHAVVPGPWQEDVADAEcAGI    | N-Term(iTRAQ4plex); C26(Carbar | 1 | 2 |
| [R].nPDGDPPGGPWcYTTDPAVR.[F]        | N-Term(iTRAQ4plex); C11(Carbar | 1 | 1 |
| [R].nPDGDPPGGPWcYTTDPAVR.[F]        | N-Term(iTRAQ4plex); C11(Carbar | 1 | 1 |
| [K].mVcGPGSGSQLVLLk.[L]             | N-Term(iTRAQ4plex); C3(Carbam  | 1 | 1 |
| [K].eQWILTAR.[Q]                    | N-Term(iTRAQ4plex)             | 1 | 2 |
| [K].eQWILTAR.[Q]                    | N-Term(iTRAQ4plex)             | 1 | 2 |
| [R].vSVFVDWIHK.[V]                  | N-Term(iTRAQ4plex); K10(iTRAQ  | 1 | 2 |
| [R].cADDQPPSILDPPDQVQFEk.[C]        | N-Term(iTRAQ4plex); C1(Carbam  | 1 | 1 |
| [R].qEATTVScFR.[G]                  | N-Term(iTRAQ4plex); C8(Carbam  | 1 | 1 |
| [R].nPDGSERPWcYTTDPQIER.[E]         | N-Term(iTRAQ4plex); C10(Carbar | 1 | 2 |
| [R].aAFcYQIR.[R]                    | N-Term(iTRAQ4plex); C4(Carbam  | 1 | 1 |
| [K].cLAYDFYPGk.[I]                  | N-Term(iTRAQ4plex); C1(Carbam  | 1 | 1 |
| [R].eDIFMETLk.[D]                   | N-Term(iTRAQ4plex); K9(iTRAQ4  | 1 | 1 |
| [K].EIPAWVPFDPAAQITk.[Q]            | K16(iTRAQ4plex)                | 1 | 1 |
| [K].eIPAWVPFDPAAQITk.[Q]            | N-Term(iTRAQ4plex); K16(iTRAQ  | 1 | 1 |
| [K].eIPAWVPFDPAAQITk.[Q]            | N-Term(iTRAQ4plex); K16(iTRAQ  | 1 | 1 |
| [R].qVEGMEDWk.[Q]                   | N-Term(iTRAQ4plex); K9(iTRAQ4  | 1 | 1 |
| [K].aYLEEEcPATLR.[K]                | N-Term(iTRAQ4plex); C7(Carbam  | 1 | 1 |

|                                |                                |   |   |
|--------------------------------|--------------------------------|---|---|
| [K].aYLEEEcPATLR.[K]           | N-Term(iTRAQ4plex); C7(Carbam  | 1 | 1 |
| [K].hVEDVPAFAQLGSNLNDLQFFR.[Y] | N-Term(iTRAQ4plex)             | 1 | 1 |
| [R].ySLTYIYTGLSk.[H]           | N-Term(iTRAQ4plex); K12(iTRAQ  | 1 | 1 |
| [R].qDPPSVVVTSHQAPGEK.[K]      | N-Term(iTRAQ4plex); K17(iTRAQ  | 1 | 1 |
| [R].qDPPSVVVTSHQAPGEK.[K]      | N-Term(iTRAQ4plex); K17(iTRAQ  | 1 | 1 |
| [K].aREDIFMETLk.[D]            | N-Term(iTRAQ4plex); K11(iTRAQ  | 1 | 1 |
| [K].hVEDVPAFAQLGSNLNDLQFFR.[Y] | N-Term(iTRAQ4plex)             | 1 | 1 |
| [K].aREDIFMETLk.[D]            | N-Term(iTRAQ4plex); K11(iTRAQ  | 1 | 1 |
| [K].qkWEAEPVYVQR.[A]           | N-Term(iTRAQ4plex); K2(iTRAQ4  | 1 | 1 |
| [R].aGEVQEPeLR.[G]             | N-Term(iTRAQ4plex)             | 1 | 1 |
| [R].aGEVQEPeLR.[G]             | N-Term(iTRAQ4plex)             | 1 | 1 |
| [K].WEAEPVYVQR.[A]             |                                | 1 | 1 |
| [K].AYLEEEcPATLR.[K]           | C7(Carbamidomethyl)            | 1 | 1 |
| [R].AGEVQEPeLR.[G]             |                                | 1 | 1 |
| [R].aGEVQEPeLR.[G]             | N-Term(iTRAQ4plex)             | 1 | 1 |
| [K].dYIEFNk.[E]                | N-Term(iTRAQ4plex); K7(iTRAQ4  | 1 | 1 |
| [K].wEAEPVYVQR.[A]             | N-Term(iTRAQ4plex)             | 1 | 1 |
| [R].qVEGMEDWk.[Q]              | N-Term(iTRAQ4plex); K9(iTRAQ4  | 1 | 1 |
| [K].qkWEAEPVYVQR.[A]           | N-Term(iTRAQ4plex); K2(iTRAQ4  | 1 | 1 |
| [K].qkWEAEPVYVQR.[A]           | N-Term(iTRAQ4plex); K2(iTRAQ4  | 1 | 1 |
| [R].qVEGMEDWk.[Q]              | N-Term(iTRAQ4plex); M5(Oxidati | 1 | 1 |
| [R].EDIFMETLk.[D]              | K9(iTRAQ4plex)                 | 1 | 1 |
| [R].sSGAFWk.[Y]                | N-Term(iTRAQ4plex); K7(iTRAQ4  | 1 | 1 |
| [R].aGEVQEPeLR.[G]             | N-Term(iTRAQ4plex)             | 1 | 1 |
| [R].sSGAFWk.[Y]                | N-Term(iTRAQ4plex); K7(iTRAQ4  | 1 | 1 |
| [K].cLAYDFYPGk.[I]             | N-Term(iTRAQ4plex); C1(Carbam  | 1 | 1 |
| [K].dYIEFNk.[E]                | N-Term(iTRAQ4plex); K7(iTRAQ4  | 1 | 1 |
| [R].AGEVQEPeLR.[G]             |                                | 1 | 1 |
| [R].eDIFmETLk.[D]              | N-Term(iTRAQ4plex); M5(Oxidati | 1 | 1 |
| [R].qVEGMEDWk.[Q]              | N-Term(iTRAQ4plex); M5(Oxidati | 1 | 1 |
| [K].qkWEAEPVYVQR.[A]           | N-Term(iTRAQ4plex); K2(iTRAQ4  | 1 | 1 |
| [K].AREDFMETLk.[D]             | K11(iTRAQ4plex)                | 1 | 1 |
| [R].sSGAFWk.[Y]                | N-Term(iTRAQ4plex); K7(iTRAQ4  | 1 | 1 |
| [K].eIPAWVPFDPAAQITk.[Q]       | N-Term(iTRAQ4plex); K16(iTRAQ  | 1 | 1 |
| [R].eDIFMETLk.[D]              | N-Term(iTRAQ4plex); K9(iTRAQ4  | 1 | 1 |
| [K].wEAEPVYVQR.[A]             | N-Term(iTRAQ4plex)             | 1 | 1 |
| [R].qVEGMEDWk.[Q]              | N-Term(iTRAQ4plex); K9(iTRAQ4  | 1 | 1 |
| [R].aGEVQEPeLR.[G]             | N-Term(iTRAQ4plex)             | 1 | 1 |
| [K].iSNIPDEYFk.[R]             | N-Term(iTRAQ4plex); K10(iTRAQ  | 1 | 1 |
| [K].iSNIPDEYFk.[R]             | N-Term(iTRAQ4plex); K10(iTRAQ  | 1 | 1 |
| [R].iSETSLPPDMYEeLR.[V]        | N-Term(iTRAQ4plex); C13(Carbar | 1 | 1 |
| [R].iSETSLPPDMYEeLR.[V]        | N-Term(iTRAQ4plex); C13(Carbar | 1 | 1 |
| [R].iSETSLPPDMYEeLR.[V]        | N-Term(iTRAQ4plex); C13(Carbar | 1 | 1 |
| [R].iSETSLPPDMYEeLR.[V]        | N-Term(iTRAQ4plex); C13(Carbar | 1 | 1 |
| [R].iSETSLPPDMYEeLR.[V]        | N-Term(iTRAQ4plex); C13(Carbar | 1 | 1 |
| [R].iSETSLPPDMYEeLR.[V]        | N-Term(iTRAQ4plex); C13(Carbar | 1 | 1 |
| [R].iSETSLPPDMYEeLR.[V]        | N-Term(iTRAQ4plex); C13(Carbar | 1 | 1 |
| [K].niPTVNENLENYLEVNLQLEk.[F]  | N-Term(iTRAQ4plex); K21(iTRAQ  | 1 | 1 |
| [K].niPTVNENLENYLEVNLQLEk.[F]  | N-Term(iTRAQ4plex); K21(iTRAQ  | 1 | 1 |
| [K].iLGPLSYSk.[I]              | N-Term(iTRAQ4plex); K9(iTRAQ4  | 1 | 1 |
| [K].sLEDLQLTHNk.[I]            | N-Term(iTRAQ4plex); K11(iTRAQ  | 1 | 1 |
| [R].IkEDAVSAAfk.[G]            | N-Term(iTRAQ4plex); K2(iTRAQ4  | 1 | 1 |

|                               |                                |   |   |
|-------------------------------|--------------------------------|---|---|
| [R].IkEDAVSAAfK.[G]           | N-Term(iTRAQ4plex); K2(iTRAQ4  | 1 | 1 |
| [R].IkEDAVSAAfK.[G]           | N-Term(iTRAQ4plex); K2(iTRAQ4  | 1 | 1 |
| [R].IkEDAVSAAfK.[G]           | N-Term(iTRAQ4plex); K2(iTRAQ4  | 1 | 1 |
| [R].IkEDAVSAAfK.[G]           | N-Term(iTRAQ4plex); K2(iTRAQ4  | 1 | 1 |
| [R].nNQIDHIDEk.[A]            | N-Term(iTRAQ4plex); K10(iTRAQ  | 1 | 1 |
| [K].sVPMVPPGik.[Y]            | N-Term(iTRAQ4plex); K10(iTRAQ  | 1 | 1 |
| [R].fNALQYLR.[L]              |                                | 1 | 1 |
| [K].sVPMVPPGik.[Y]            | N-Term(iTRAQ4plex); K10(iTRAQ  | 1 | 1 |
| [K].sVPMVPPGik.[Y]            | N-Term(iTRAQ4plex); K10(iTRAQ  | 1 | 1 |
| [K].sVPMVPPGik.[Y]            | N-Term(iTRAQ4plex); K10(iTRAQ  | 1 | 1 |
| [K].nIPTVNENLENYYLEVNQLEk.[F] | N-Term(iTRAQ4plex); K21(iTRAQ  | 1 | 1 |
| [K].sLEYLDLSFNQIAR.[L]        | N-Term(iTRAQ4plex)             | 1 | 1 |
| [K].sLEYLDLSFNQIAR.[L]        | N-Term(iTRAQ4plex)             | 1 | 1 |
| [R].nNQIDHIDEk.[A]            | N-Term(iTRAQ4plex); K10(iTRAQ  | 1 | 1 |
| [R].nNQIDHIDEk.[A]            | N-Term(iTRAQ4plex); K10(iTRAQ  | 1 | 1 |
| [R].nNQIDHIDEk.[A]            | N-Term(iTRAQ4plex); K10(iTRAQ  | 1 | 1 |
| [R].nNQIDHIDEk.[A]            | N-Term(iTRAQ4plex); K10(iTRAQ  | 1 | 1 |
| [R].nNQIDHIDEk.[A]            | N-Term(iTRAQ4plex); K10(iTRAQ  | 1 | 1 |
| [R].nNQIDHIDEk.[A]            | N-Term(iTRAQ4plex); K10(iTRAQ  | 1 | 1 |
| [R].IPSGLPVSLTLTYLDNNk.[I]    | N-Term(iTRAQ4plex); K18(iTRAQ  | 1 | 1 |
| [R].nNQIDHIDEk.[A]            | N-Term(iTRAQ4plex); K10(iTRAQ  | 1 | 1 |
| [R].nNQIDHIDEk.[A]            | N-Term(iTRAQ4plex); K10(iTRAQ  | 1 | 1 |
| [R].IPSGLPVSLTLTYLDNNk.[I]    | N-Term(iTRAQ4plex); K18(iTRAQ  | 1 | 1 |
| [K].sLEDLQLTHNk.[I]           | N-Term(iTRAQ4plex); K11(iTRAQ  | 1 | 1 |
| [K].sLEDLQLTHNk.[I]           | N-Term(iTRAQ4plex); K11(iTRAQ  | 1 | 1 |
| [K].eDAVSAAfK.[G]             | N-Term(iTRAQ4plex); K9(iTRAQ4  | 1 | 1 |
| [R].iSETSLPPDMEeCLR.[V]       | N-Term(iTRAQ4plex); C13(Carbar | 1 | 1 |
| [K].sLEYLDLSFNQIAR.[L]        | N-Term(iTRAQ4plex)             | 1 | 1 |
| [K].sLEYLDLSFNQIAR.[L]        | N-Term(iTRAQ4plex)             | 1 | 1 |
| [R].IkEDAVSAAfK.[G]           | N-Term(iTRAQ4plex); K2(iTRAQ4  | 1 | 1 |
| [R].fNALQYLR.[L]              | N-Term(iTRAQ4plex)             | 1 | 1 |
| [R].nNQIDHIDEk.[A]            | N-Term(iTRAQ4plex); K10(iTRAQ  | 1 | 1 |
| [K].sLEDLQLTHNk.[I]           | N-Term(iTRAQ4plex); K11(iTRAQ  | 1 | 1 |
| [K].iLGPLSYSk.[I]             | K9(iTRAQ4plex)                 | 1 | 1 |
| [R].LkEDAVSAAfK.[G]           | K2(iTRAQ4plex); K11(iTRAQ4ple  | 1 | 1 |
| [K].iLGPLSYSk.[I]             | N-Term(iTRAQ4plex); K9(iTRAQ4  | 1 | 1 |
| [R].IkEDAVSAAfK.[G]           | N-Term(iTRAQ4plex); K2(iTRAQ4  | 1 | 1 |
| [R].IkEDAVSAAfK.[G]           | N-Term(iTRAQ4plex); K2(iTRAQ4  | 1 | 1 |
| [K].iLGPLSYSk.[I]             | N-Term(iTRAQ4plex); K9(iTRAQ4  | 1 | 1 |
| [R].nNQIDHIDEk.[A]            | N-Term(iTRAQ4plex); K10(iTRAQ  | 1 | 1 |
| [K].iLGPLSYSk.[I]             | N-Term(iTRAQ4plex); K9(iTRAQ4  | 1 | 1 |
| [R].nNQIDHIDEk.[A]            | N-Term(iTRAQ4plex); K10(iTRAQ  | 1 | 1 |
| [K].rFNALQYLR.[L]             | N-Term(iTRAQ4plex)             | 1 | 1 |
| [K].SLEYLDLSFNQIAR.[L]        |                                | 1 | 1 |
| [R].fNALQYLR.[L]              | N-Term(iTRAQ4plex)             | 1 | 1 |
| [R].NNQIDHIDEk.[A]            | K10(iTRAQ4plex)                | 1 | 1 |
| [K].sVPMVPPGik.[Y]            | N-Term(iTRAQ4plex); K10(iTRAQ  | 1 | 1 |
| [K].sVPMVPPGik.[Y]            | K10(iTRAQ4plex)                | 1 | 1 |
| [K].SLEDLQLTHNk.[I]           | K11(iTRAQ4plex)                | 1 | 1 |
| [R].vANEVTLN.[-]              | N-Term(iTRAQ4plex)             | 1 | 1 |
| [K].nIPTVNENLENYYLEVNQLEk.[F] | N-Term(iTRAQ4plex); K21(iTRAQ  | 1 | 1 |
| [K].sLEYLDLSFNQIAR.[L]        | N-Term(iTRAQ4plex)             | 1 | 1 |

|                                     |                                |   |   |
|-------------------------------------|--------------------------------|---|---|
| [K].fEIEncLANk.[V]                  | N-Term(iTRAQ4plex); C6(Carbam  | 1 | 1 |
| [R].SSGSLNNAIk.[G]                  | K11(iTRAQ4plex)                | 2 | 2 |
| [K].mVSGFIPlkPTVk.[M]               | N-Term(iTRAQ4plex); M1(Oxidati | 2 | 2 |
| [K].mVSGFIPlkPTVk.[M]               | N-Term(iTRAQ4plex); M1(Oxidati | 2 | 2 |
| [K].aVGYLITGYQR.[Q]                 | N-Term(iTRAQ4plex)             | 1 | 1 |
| [K].aTVLNYLPk.[C]                   | N-Term(iTRAQ4plex); K9(iTRAQ4  | 2 | 2 |
| [R].sLFTDLVAEk.[D]                  | N-Term(iTRAQ4plex); K10(iTRAQ  | 1 | 1 |
| [K].aGAFcLSEDAGLGISSTASLR.[A]       | N-Term(iTRAQ4plex); C5(Carbam  | 2 | 2 |
| [K].aGAFcLSEDAGLGISSTASLR.[A]       | N-Term(iTRAQ4plex); C5(Carbam  | 2 | 2 |
| [K].aGAFcLSEDAGLGISSTASLR.[A]       | N-Term(iTRAQ4plex); C5(Carbam  | 2 | 2 |
| [K].mVSGFIPlkPTVk.[M]               | N-Term(iTRAQ4plex); K9(iTRAQ4  | 2 | 2 |
| [K].aGAFcLSEDAGLGISSTASLR.[A]       | N-Term(iTRAQ4plex); C5(Carbam  | 2 | 2 |
| [K].mVSGFIPlkPTVk.[M]               | N-Term(iTRAQ4plex); K9(iTRAQ4  | 2 | 2 |
| [K].eDSPFALK.[V]                    | N-Term(iTRAQ4plex); K8(iTRAQ4  | 1 | 1 |
| [R].aFQPFVELTMPYSVIR.[G]            | N-Term(iTRAQ4plex)             | 2 | 2 |
| [R].aFQPFVELTMPYSVIR.[G]            | N-Term(iTRAQ4plex)             | 2 | 2 |
| [K].aGAFcLSEDAGLGISSTASLR.[A]       | N-Term(iTRAQ4plex); C5(Carbam  | 2 | 2 |
| [K].IEAGINQLSFPLSSEPIQGSYR.[V]      | N-Term(iTRAQ4plex)             | 1 | 1 |
| [R].sSGSLLNNAIk.[G]                 | N-Term(iTRAQ4plex); K11(iTRAQ  | 2 | 2 |
| [K].hQDGSYSTFGER.[Y]                | N-Term(iTRAQ4plex)             | 1 | 1 |
| [K].aTVLNYLPk.[C]                   | N-Term(iTRAQ4plex); K9(iTRAQ4  | 2 | 2 |
| [R].sSGSLLNNAIk.[G]                 | N-Term(iTRAQ4plex); K11(iTRAQ  | 2 | 2 |
| [R].iSEITNIVSk.[L]                  | N-Term(iTRAQ4plex); K10(iTRAQ  | 1 | 1 |
| [K].mVSGFIPlkPTVk.[M]               | N-Term(iTRAQ4plex); K9(iTRAQ4  | 2 | 2 |
| [R].vVSDENFRPR.[N]                  | N-Term(iTRAQ4plex)             | 1 | 1 |
| [R].sSGSLLNNAIk.[G]                 | N-Term(iTRAQ4plex); K11(iTRAQ  | 2 | 2 |
| [R].eILNSLDk.[E]                    | N-Term(iTRAQ4plex); K8(iTRAQ4  | 1 | 1 |
| [K].eGTHGSHVYTk.[A]                 | N-Term(iTRAQ4plex); K11(iTRAQ  | 1 | 1 |
| [R].sSGSLLNNAIk.[G]                 | N-Term(iTRAQ4plex); K11(iTRAQ  | 2 | 2 |
| [K].aTVLNYLPk.[C]                   | N-Term(iTRAQ4plex); K9(iTRAQ4  | 2 | 2 |
| [K].mLQITNTGFEMk.[L]                | N-Term(iTRAQ4plex); K12(iTRAQ  | 1 | 1 |
| [K].vQTVPQTcDGHk.[A]                | N-Term(iTRAQ4plex); C8(Carbam  | 1 | 1 |
| [K].aSPAFLASQNTk.[G]                | N-Term(iTRAQ4plex); K12(iTRAQ  | 1 | 1 |
| [K].aTVLNYLPk.[C]                   | N-Term(iTRAQ4plex); K9(iTRAQ4  | 2 | 2 |
| [R].iAQWQSLk.[L]                    | N-Term(iTRAQ4plex); K8(iTRAQ4  | 1 | 1 |
| [K].aQWANPFDPsk.[T]                 | N-Term(iTRAQ4plex); K11(iTRAQ  | 1 | 1 |
| [K].aQWANPFDPsk.[T]                 | N-Term(iTRAQ4plex); K11(iTRAQ  | 1 | 1 |
| [K].aQWANPFDPsk.[T]                 | N-Term(iTRAQ4plex); K11(iTRAQ  | 1 | 1 |
| [K].GTEAAVPEVELSDQPENTFLHPIIQIDR.[S |                                | 1 | 1 |
| [K].TEDSSSFLIDk.[T]                 | K11(iTRAQ4plex)                | 1 | 1 |
| [K].tEDSSSFLIDk.[T]                 | N-Term(iTRAQ4plex); K11(iTRAQ  | 1 | 1 |
| [K].tEDSSSFLIDk.[T]                 | N-Term(iTRAQ4plex); K11(iTRAQ  | 1 | 1 |
| [K].eGQMESVEAAMSSk.[T]              | N-Term(iTRAQ4plex); K14(iTRAQ  | 1 | 1 |
| [K].fSISATYDLGATLLk.[M]             | N-Term(iTRAQ4plex); K15(iTRAQ  | 1 | 1 |
| [K].fSISATYDLGATLLk.[M]             | N-Term(iTRAQ4plex); K15(iTRAQ  | 1 | 1 |
| [K].gWVDLFVpk.[F]                   | N-Term(iTRAQ4plex); K9(iTRAQ4  | 1 | 1 |
| [K].nALALFVLPk.[E]                  | N-Term(iTRAQ4plex); K10(iTRAQ  | 1 | 1 |
| [K].vVGLIQDLkPNTIMVLVNYIHfk.[A]     | N-Term(iTRAQ4plex); K9(iTRAQ4  | 1 | 1 |
| [K].gWVDLFVpk.[F]                   | N-Term(iTRAQ4plex); K9(iTRAQ4  | 1 | 1 |
| [R].rFTVETPDk.[N]                   | N-Term(iTRAQ4plex); K9(iTRAQ4  | 1 | 1 |
| [K].aVLHIGEk.[G]                    | N-Term(iTRAQ4plex); K8(iTRAQ4  | 1 | 1 |
| [R].SILFLGk.[V]                     | N-Term(iTRAQ4plex); K7(iTRAQ4  | 1 | 1 |

|                                      |                                |   |   |
|--------------------------------------|--------------------------------|---|---|
| [R].FTVETPDk.[N]                     | K8(iTRAQ4plex)                 | 1 | 1 |
| [K].hLkPLAk.[F]                      | N-Term(iTRAQ4plex); K3(iTRAQ4  | 1 | 1 |
| [R].sILFLGk.[V]                      | N-Term(iTRAQ4plex); K7(iTRAQ4  | 1 | 1 |
| [K].aVLHIGEk.[G]                     | N-Term(iTRAQ4plex); K8(iTRAQ4  | 1 | 1 |
| [K].keLELQIGNALFIGk.[H]              | N-Term(iTRAQ4plex); K1(iTRAQ4  | 1 | 1 |
| [K].aVLHIGEk.[G]                     | N-Term(iTRAQ4plex); K8(iTRAQ4  | 1 | 1 |
| [R].aAFGQGS GPIMLDEVQcTGTEASLADck.[S | N-Term(iTRAQ4plex); C17(Carbar | 1 | 1 |
| [R].ksQLVYQSR.[R]                    | N-Term(iTRAQ4plex); K1(iTRAQ4  | 1 | 1 |
| [R].rIDITLSSVk.[C]                   | N-Term(iTRAQ4plex); K10(iTRAQ  | 1 | 1 |
| [R].eLSEALGQIFDSQR.[G]               | N-Term(iTRAQ4plex)             | 1 | 1 |
| [R].eLSEALGQIFDSQR.[G]               | N-Term(iTRAQ4plex)             | 1 | 1 |
| [R].sDLAVPSELALLk.[A]                | N-Term(iTRAQ4plex); K13(iTRAQ  | 1 | 1 |
| [R].gQWGTVCdNLWDLTDASVcR.[A]         | N-Term(iTRAQ4plex); C7(Carbam  | 1 | 1 |
| [R].gQWGTVCdNLWDLTDASVcR.[A]         | N-Term(iTRAQ4plex); C7(Carbam  | 1 | 1 |
| [R].IADGGATNQGR.[V]                  | N-Term(iTRAQ4plex)             | 1 | 1 |
| [R].iYTSPTWSAFVTDSSWSAR.[K]          | N-Term(iTRAQ4plex)             | 1 | 1 |
| [R].aSHEEVEGLVEk.[I]                 | N-Term(iTRAQ4plex); K12(iTRAQ  | 1 | 1 |
| [R].ksQLVYQSR.[R]                    | N-Term(iTRAQ4plex); K1(iTRAQ4  | 1 | 1 |
| [R].ASHEEVEGLVEk.[I]                 | K12(iTRAQ4plex)                | 1 | 1 |
| [K].IASAYGAR.[Q]                     | N-Term(iTRAQ4plex)             | 1 | 1 |
| [R].rIDITLSSVk.[C]                   | N-Term(iTRAQ4plex); K10(iTRAQ  | 1 | 1 |
| [R].iDITLSSVk.[C]                    | N-Term(iTRAQ4plex); K9(iTRAQ4  | 1 | 1 |
| [K].aVDTWSWGER.[A]                   | N-Term(iTRAQ4plex)             | 1 | 1 |
| [R].aAFGQGS GPIMLDEVQcTGTEASLADck.[S | N-Term(iTRAQ4plex); C17(Carbar | 1 | 1 |
| [R].iDITLSSVk.[C]                    | N-Term(iTRAQ4plex); K9(iTRAQ4  | 1 | 1 |
| [R].sTHTLDLSR.[E]                    | N-Term(iTRAQ4plex)             | 1 | 1 |
| [R].sDLAVPSELALLk.[A]                | N-Term(iTRAQ4plex); K13(iTRAQ  | 1 | 1 |
| [K].sQLVYQSR.[R]                     | N-Term(iTRAQ4plex)             | 1 | 1 |
| [R].fScFQEEAPQPHYQLR.[A]             | N-Term(iTRAQ4plex); C3(Carbam  | 1 | 1 |
| [R].vTPNLMGHLcGNQR.[V]               | N-Term(iTRAQ4plex); C10(Carbar | 1 | 1 |
| [K].eVGPPLPQEAVPLQk.[E]              | N-Term(iTRAQ4plex); K15(iTRAQ  | 1 | 1 |
| [R].dPALccYLSPGDEQVnCFNINYLR.[N]     | N-Term(iTRAQ4plex); C5(Carbam  | 1 | 1 |
| [K].tRPHWccTR.[Q]                    | N-Term(iTRAQ4plex); C6(Carbam  | 1 | 1 |
| [K].ITFINDLcGPR.[R]                  | N-Term(iTRAQ4plex); C8(Carbam  | 1 | 1 |
| [R].rAPYPNYDR.[D]                    | N-Term(iTRAQ4plex)             | 1 | 1 |
| [R].rAPYPNYDR.[D]                    | N-Term(iTRAQ4plex)             | 1 | 1 |
| [R].nVALVSGDTENAk.[G]                | N-Term(iTRAQ4plex); K13(iTRAQ  | 1 | 1 |
| [R].fcEAefSVk.[T]                    | N-Term(iTRAQ4plex); C2(Carbam  | 1 | 1 |
| [K].aWEDTLdk.[Y]                     | N-Term(iTRAQ4plex); K8(iTRAQ4  | 1 | 1 |
| [R].fScFQEEAPQPHYQLR.[A]             | N-Term(iTRAQ4plex); C3(Carbam  | 1 | 1 |
| [K].eVGPPLPQEAVPLQk.[E]              | N-Term(iTRAQ4plex); K15(iTRAQ  | 1 | 1 |
| [R].eLLALIQLER.[E]                   | N-Term(iTRAQ4plex)             | 1 | 1 |
| [K].tHHHLccR.[H]                     | N-Term(iTRAQ4plex); C6(Carbam  | 1 | 1 |
| [K].IVWEEAMSR.[F]                    | N-Term(iTRAQ4plex)             | 1 | 1 |
| [K].tHHHLccR.[H]                     | N-Term(iTRAQ4plex); C6(Carbam  | 1 | 1 |
| [R].dILTIDIGR.[V]                    | N-Term(iTRAQ4plex)             | 1 | 1 |
| [R].fcEAefSVk.[T]                    | N-Term(iTRAQ4plex); C2(Carbam  | 1 | 1 |
| [K].ITFINDLcGPR.[R]                  | N-Term(iTRAQ4plex); C8(Carbam  | 1 | 1 |
| [R].vTPNLMGHLcGNQR.[V]               | N-Term(iTRAQ4plex); C10(Carbar | 1 | 1 |
| [R].tPAYPNAGLIK.[N]                  | N-Term(iTRAQ4plex); K12(iTRAQ  | 1 | 1 |
| [R].nPDPVAAPWcYTTDPSVR.[W]           | N-Term(iTRAQ4plex); C10(Carbar | 1 | 1 |
| [R].rIPLYPNAGLTR.[N]                 | N-Term(iTRAQ4plex)             | 1 | 1 |





|                                |                                |   |   |
|--------------------------------|--------------------------------|---|---|
| [R].IELHVDGPPPRPQLR.[A]        | N-Term(iTRAQ4plex)             | 1 | 1 |
| [R].IELHVDGPPPRPQLR.[A]        | N-Term(iTRAQ4plex)             | 1 | 1 |
| [R].IELHVDGPPPRPQLR.[A]        | N-Term(iTRAQ4plex)             | 1 | 1 |
| [R].IELHVDGPPPRPQLR.[A]        | N-Term(iTRAQ4plex)             | 1 | 1 |
| [R].IELHVDGPPPRPQLR.[A]        | N-Term(iTRAQ4plex)             | 1 | 1 |
| [R].IELHVDGPPPRPQLR.[A]        | N-Term(iTRAQ4plex)             | 1 | 1 |
| [R].IELHVDGPPPRPQLR.[A]        | N-Term(iTRAQ4plex)             | 1 | 1 |
| [R].IELHVDGPPPRPQLR.[A]        | N-Term(iTRAQ4plex)             | 1 | 1 |
| [R].IELHVDGPPPRPQLR.[A]        | N-Term(iTRAQ4plex)             | 1 | 1 |
| [R].IELHVDGPPPRPQLR.[A]        | N-Term(iTRAQ4plex)             | 1 | 1 |
| [R].IELHVDGPPPRPQLR.[A]        | N-Term(iTRAQ4plex)             | 1 | 1 |
| [R].sWVPHTFESESDPVELLVAES.[-]  | N-Term(iTRAQ4plex)             | 1 | 1 |
| [R].sWVPHTFESESDPVELLVAES.[-]  | N-Term(iTRAQ4plex)             | 1 | 1 |
| [K].hQFLTGTQGR.[Y]             | N-Term(iTRAQ4plex)             | 1 | 1 |
| [R].ATWSGAVLAGR.[D]            |                                | 1 | 1 |
| [R].sGLSTGWTQLSk.[L]           | N-Term(iTRAQ4plex); K12(iTRAQ4 | 1 | 1 |
| [R].sGLSTGWTQLSk.[L]           | N-Term(iTRAQ4plex); K12(iTRAQ4 | 1 | 1 |
| [R].sGLSTGWTQLSk.[L]           | N-Term(iTRAQ4plex); K12(iTRAQ4 | 1 | 1 |
| [K].ILELTGpk.[S]               | N-Term(iTRAQ4plex); K8(iTRAQ4  | 1 | 1 |
| [K].ILELTGpk.[S]               | N-Term(iTRAQ4plex); K8(iTRAQ4  | 1 | 1 |
| [K].ILELTGpk.[S]               | N-Term(iTRAQ4plex); K8(iTRAQ4  | 1 | 1 |
| [K].ILELTGpk.[S]               | N-Term(iTRAQ4plex); K8(iTRAQ4  | 1 | 1 |
| [R].IELHVDGPPPRPQLR.[A]        | N-Term(iTRAQ4plex)             | 1 | 1 |
| [R].IELHVDGPPPRPQLR.[A]        | N-Term(iTRAQ4plex)             | 1 | 1 |
| [R].IELHVDGPPPRPQLR.[A]        | N-Term(iTRAQ4plex)             | 1 | 1 |
| [R].IELHVDGPPPRPQLR.[A]        | N-Term(iTRAQ4plex)             | 1 | 1 |
| [R].IELHVDGPPPRPQLR.[A]        | N-Term(iTRAQ4plex)             | 1 | 1 |
| [R].IELHVDGPPPRPQLR.[A]        | N-Term(iTRAQ4plex)             | 1 | 1 |
| [R].IELHVDGPPPRPQLR.[A]        | N-Term(iTRAQ4plex)             | 1 | 1 |
| [R].IELHVDGPPPRPQLR.[A]        | N-Term(iTRAQ4plex)             | 1 | 1 |
| [R].IELHVDGPPPRPQLR.[A]        | N-Term(iTRAQ4plex)             | 1 | 1 |
| [R].IELHVDGPPPRPQLR.[A]        | N-Term(iTRAQ4plex)             | 1 | 1 |
| [R].cEGIPDVTfELLR.[E]          | N-Term(iTRAQ4plex); C1(Carbam  | 1 | 1 |
| [R].cEGIPDVTfELLR.[E]          | N-Term(iTRAQ4plex); C1(Carbam  | 1 | 1 |
| [R].tPGAAANLELIFVGPQHAGNYR.[C] | N-Term(iTRAQ4plex)             | 1 | 1 |
| [R].TPGAAANLELIFVGPQHAGNYR.[C] |                                | 1 | 1 |
| [R].tPGAAANLELIFVGPQHAGNYR.[C] | N-Term(iTRAQ4plex)             | 1 | 1 |
| [R].tPGAAANLELIFVGPQHAGNYR.[C] | N-Term(iTRAQ4plex)             | 1 | 1 |
| [R].tPGAAANLELIFVGPQHAGNYR.[C] | N-Term(iTRAQ4plex)             | 1 | 1 |
| [R].tPGAAANLELIFVGPQHAGNYR.[C] | N-Term(iTRAQ4plex)             | 1 | 1 |
| [K].vTLTcVAPLSGVDFQLR.[R]      | N-Term(iTRAQ4plex); C5(Carbam  | 1 | 1 |
| [K].vTLTcVAPLSGVDFQLR.[R]      | N-Term(iTRAQ4plex); C5(Carbam  | 1 | 1 |
| [K].vTLTcVAPLSGVDFQLR.[R]      | N-Term(iTRAQ4plex); C5(Carbam  | 1 | 1 |
| [K].sLPAPWLSMAPVSWITPGLk.[T]   | N-Term(iTRAQ4plex); K20(iTRAQ4 | 1 | 1 |
| [K].nGVAQEPVHLDSPAIk.[H]       | N-Term(iTRAQ4plex); K16(iTRAQ4 | 1 | 1 |
| [K].sLPAPWLSMAPVSWITPGLk.[T]   | N-Term(iTRAQ4plex); K20(iTRAQ4 | 1 | 1 |
| [K].sLPAPWLSMAPVSWITPGLk.[T]   | N-Term(iTRAQ4plex); K20(iTRAQ4 | 1 | 1 |
| [R].iFFHLNAVALGDGGHYTCr.[Y]    | N-Term(iTRAQ4plex); C18(Carbar | 1 | 1 |
| [R].iFFHLNAVALGDGGHYTCr.[Y]    | N-Term(iTRAQ4plex); C18(Carbar | 1 | 1 |
| [R].iFFHLNAVALGDGGHYTCr.[Y]    | N-Term(iTRAQ4plex); C18(Carbar | 1 | 1 |
| [K].sLPAPWLSmAPVSWITPGLk.[T]   | N-Term(iTRAQ4plex); M9(Oxidati | 1 | 1 |
| [R].iFFHLNAVALGDGGHYTCr.[Y]    | N-Term(iTRAQ4plex); C18(Carbar | 1 | 1 |
| [R].iFFHLNAVALGDGGHYTCr.[Y]    | N-Term(iTRAQ4plex); C18(Carbar | 1 | 1 |

|                                |                                |   |   |
|--------------------------------|--------------------------------|---|---|
| [R].tPGAAANLELIFVGPQHAGNYR.[C] | N-Term(iTRAQ4plex)             | 1 | 1 |
| [K].hQFLLTGDTQGR.[Y]           | N-Term(iTRAQ4plex)             | 1 | 1 |
| [K].hQFLLTGDTQGR.[Y]           | N-Term(iTRAQ4plex)             | 1 | 1 |
| [K].HQFLLTGDTQGR.[Y]           |                                | 1 | 1 |
| [R].tPGAAANLELIFVGPQHAGNYR.[C] | N-Term(iTRAQ4plex)             | 1 | 1 |
| [R].IELHVDGPPPRPQLR.[A]        | N-Term(iTRAQ4plex)             | 1 | 1 |
| [R].IELHVDGPPPRPQLR.[A]        | N-Term(iTRAQ4plex)             | 1 | 1 |
| [R].IELHVDGPPPRPQLR.[A]        | N-Term(iTRAQ4plex)             | 1 | 1 |
| [R].IELHVDGPPPRPQLR.[A]        | N-Term(iTRAQ4plex)             | 1 | 1 |
| [K].ILELTGPK.[S]               | N-Term(iTRAQ4plex)             | 1 | 1 |
| [K].vTLTcVAPLSGVDFQLR.[R]      | N-Term(iTRAQ4plex); C5(Carbam  | 1 | 1 |
| [K].ILELTGPK.[S]               | N-Term(iTRAQ4plex); K8(iTRAQ4  | 1 | 1 |
| [R].aTWSGAVLAGR.[D]            | N-Term(iTRAQ4plex)             | 1 | 1 |
| [R].ATWSGAVLAGR.[D]            |                                | 1 | 1 |
| [R].aTWSGAVLAGR.[D]            | N-Term(iTRAQ4plex)             | 1 | 1 |
| [K].ILELTGPK.[S]               | N-Term(iTRAQ4plex); K8(iTRAQ4  | 1 | 1 |
| [R].LELHVDGPPPRPQLR.[A]        |                                | 1 | 1 |
| [R].ATWSGAVLAGRDAVLR.[C]       |                                | 1 | 1 |
| [K].hQFLLTGDTQGR.[Y]           | N-Term(iTRAQ4plex)             | 1 | 1 |
| [K].ILELTGPK.[S]               | N-Term(iTRAQ4plex); K8(iTRAQ4  | 1 | 1 |
| [R].tPGAAANLELIFVGPQHAGNYR.[C] | N-Term(iTRAQ4plex)             | 1 | 1 |
| [R].aTWSGAVLAGR.[D]            | N-Term(iTRAQ4plex)             | 1 | 1 |
| [K].LLELTGPK.[S]               | K8(iTRAQ4plex)                 | 1 | 1 |
| [R].aTWSGAVLAGR.[D]            | N-Term(iTRAQ4plex)             | 1 | 1 |
| [R].cLAPLEGAR.[F]              | C1(Carbamidomethyl)            | 1 | 1 |
| [R].IELHVDGPPPRPQLR.[A]        | N-Term(iTRAQ4plex)             | 1 | 1 |
| [K].LLELTGPK.[S]               | K8(iTRAQ4plex)                 | 1 | 1 |
| [R].sGLSTGWTQLSk.[L]           | N-Term(iTRAQ4plex); K12(iTRAQ  | 1 | 1 |
| [K].hQFLLTGDTQGR.[Y]           | N-Term(iTRAQ4plex)             | 1 | 1 |
| [R].LELHVDGPPPRPQLR.[A]        |                                | 1 | 1 |
| [R].IFFHLNAVALGDGGHYTcR.[Y]    | C18(Carbamidomethyl)           | 1 | 1 |
| [K].LLELTGPK.[S]               | K8(iTRAQ4plex)                 | 1 | 1 |
| [R].LELHVDGPPPRPQLR.[A]        |                                | 1 | 1 |
| [K].ILELTGPK.[S]               | N-Term(iTRAQ4plex); K8(iTRAQ4  | 1 | 1 |
| [R].sGLSTGWTQLSk.[L]           | N-Term(iTRAQ4plex); K12(iTRAQ  | 1 | 1 |
| [K].ILELTGPK.[S]               | N-Term(iTRAQ4plex); K8(iTRAQ4  | 1 | 1 |
| [R].GEKELLVPR.[S]              | K3(iTRAQ4plex)                 | 1 | 1 |
| [K].hQFLLTGDTQGR.[Y]           | N-Term(iTRAQ4plex)             | 1 | 1 |
| [R].aTWSGAVLAGR.[D]            | N-Term(iTRAQ4plex)             | 1 | 1 |
| [R].LELHVDGPPPRPQLR.[A]        |                                | 1 | 1 |
| [R].LELHVDGPPPRPQLR.[A]        |                                | 1 | 1 |
| [R].aTWSGAVLAGR.[D]            | N-Term(iTRAQ4plex)             | 1 | 1 |
| [R].aTWSGAVLAGR.[D]            | N-Term(iTRAQ4plex)             | 1 | 1 |
| [R].LELHVDGPPPRPQLR.[A]        |                                | 1 | 1 |
| [K].hQFLLTGDTQGR.[Y]           | N-Term(iTRAQ4plex)             | 1 | 1 |
| [K].LLELTGPK.[S]               | K8(iTRAQ4plex)                 | 1 | 1 |
| [K].tFYEPGEEITYSckPGYVSR.[G]   | N-Term(iTRAQ4plex); C13(Carbar | 1 | 1 |
| [K].tFYEPGEEITYSckPGYVSR.[G]   | N-Term(iTRAQ4plex); C13(Carbar | 1 | 1 |
| [K].tFYEPGEEITYSckPGYVSR.[G]   | N-Term(iTRAQ4plex); C13(Carbar | 1 | 1 |
| [K].tFYEPGEEITYSckPGYVSR.[G]   | N-Term(iTRAQ4plex); C13(Carbar | 1 | 1 |
| [K].tFYEPGEEITYSckPGYVSR.[G]   | N-Term(iTRAQ4plex); C13(Carbar | 1 | 1 |
| [K].KATVVYQGER.[V]             | N-Term(iTRAQ4plex); K1(iTRAQ4  | 1 | 1 |

|                                   |                                |   |   |
|-----------------------------------|--------------------------------|---|---|
| [K].eHSSLAFWk.[T]                 | N-Term(iTRAQ4plex); K9(iTRAQ4  | 1 | 1 |
| [R].tcPkPDDLPFSTVVPLk.[T]         | N-Term(iTRAQ4plex); C2(Carbam  | 1 | 1 |
| [R].tcPkPDDLPFSTVVPLk.[T]         | N-Term(iTRAQ4plex); C2(Carbam  | 1 | 1 |
| [R].tcPkPDDLPFSTVVPLk.[T]         | N-Term(iTRAQ4plex); C2(Carbam  | 1 | 1 |
| [K].aTVVYQGER.[V]                 | N-Term(iTRAQ4plex)             | 1 | 1 |
| [K].eHSSLAFWk.[T]                 | N-Term(iTRAQ4plex); K9(iTRAQ4  | 1 | 1 |
| [K].eHSSLAFWk.[T]                 | N-Term(iTRAQ4plex); K9(iTRAQ4  | 1 | 1 |
| [K].eHSSLAFWk.[T]                 | N-Term(iTRAQ4plex); K9(iTRAQ4  | 1 | 1 |
| [K].eHSSLAFWk.[T]                 | N-Term(iTRAQ4plex); K9(iTRAQ4  | 1 | 1 |
| [K].eHSSLAFWk.[T]                 | N-Term(iTRAQ4plex); K9(iTRAQ4  | 1 | 1 |
| [R].tcPkPDDLPFSTVVPLk.[T]         | N-Term(iTRAQ4plex); C2(Carbam  | 1 | 1 |
| [R].tcPkPDDLPFSTVVPLk.[T]         | N-Term(iTRAQ4plex); C2(Carbam  | 1 | 1 |
| [R].TcPkPDDLPFSTVVPLk.[T]         | C2(Carbamidomethyl); K4(iTRAC  | 1 | 1 |
| [R].TcPkPDDLPFSTVVPLk.[T]         | C2(Carbamidomethyl); K4(iTRAC  | 1 | 1 |
| [R].tcPKPDDLPFSTVVPLk.[T]         | N-Term(iTRAQ4plex); C2(Carbam  | 1 | 1 |
| [R].TcPkPDDLPFSTVVPLk.[T]         | C2(Carbamidomethyl); K4(iTRAC  | 1 | 1 |
| [R].tcPkPDDLPFSTVVPLk.[T]         | N-Term(iTRAQ4plex); C2(Carbam  | 1 | 1 |
| [R].tcPkPDDLPFSTVVPLk.[T]         | N-Term(iTRAQ4plex); C2(Carbam  | 1 | 1 |
| [R].tcPkPDDLPFSTVVPLk.[T]         | N-Term(iTRAQ4plex); C2(Carbam  | 1 | 1 |
| [K].kcSYTEDAQcIDGTIEVpk.[C]       | N-Term(iTRAQ4plex); K1(iTRAQ4  | 1 | 1 |
| [K].kcSYTEDAQcIDGTIEVpk.[C]       | N-Term(iTRAQ4plex); K1(iTRAQ4  | 1 | 1 |
| [K].kcSYTEDAQcIDGTIEVpk.[C]       | N-Term(iTRAQ4plex); K1(iTRAQ4  | 1 | 1 |
| [K].ATFGcHDGYSLDGPEEIEcTk.[L]     | C5(Carbamidomethyl); C19(Carb  | 1 | 1 |
| [K].kcSYTEDAQcIDGTIEVpk.[C]       | N-Term(iTRAQ4plex); K1(iTRAQ4  | 1 | 1 |
| [K].aTFGcHDGYSLDGPEEIEcTk.[L]     | N-Term(iTRAQ4plex); C5(Carbam  | 1 | 1 |
| [K].aTFGcHDGYSLDGPEEIEcTk.[L]     | N-Term(iTRAQ4plex); C5(Carbam  | 1 | 1 |
| [K].kATVVYQGER.[V]                | N-Term(iTRAQ4plex); K1(iTRAQ4  | 1 | 1 |
| [K].aTFGcHDGYSLDGPEEIEcTk.[L]     | N-Term(iTRAQ4plex); C5(Carbam  | 1 | 1 |
| [K].aTFGcHDGYSLDGPEEIEcTk.[L]     | N-Term(iTRAQ4plex); C5(Carbam  | 1 | 1 |
| [K].aTFGcHDGYSLDGPEEIEcTk.[L]     | N-Term(iTRAQ4plex); C5(Carbam  | 1 | 1 |
| [K].aTFGcHDGYSLDGPEEIEcTk.[L]     | N-Term(iTRAQ4plex); C5(Carbam  | 1 | 1 |
| [K].aTFGcHDGYSLDGPEEIEcTk.[L]     | N-Term(iTRAQ4plex); C5(Carbam  | 1 | 1 |
| [K].aTFGcHDGYSLDGPEEIEcTk.[L]     | N-Term(iTRAQ4plex); C5(Carbam  | 1 | 1 |
| [K].aTFGcHDGYSLDGPEEIEcTk.[L]     | N-Term(iTRAQ4plex); C5(Carbam  | 1 | 1 |
| [K].aTFGcHDGYSLDGPEEIEcTk.[L]     | N-Term(iTRAQ4plex); C5(Carbam  | 1 | 1 |
| [K].aTFGcHDGYSLDGPEEIEcTk.[L]     | N-Term(iTRAQ4plex); C5(Carbam  | 1 | 1 |
| [K].aTFGcHDGYSLDGPEEIEcTk.[L]     | N-Term(iTRAQ4plex); C5(Carbam  | 1 | 1 |
| [K].aTFGcHDGYSLDGPEEIEcTk.[L]     | N-Term(iTRAQ4plex); C5(Carbam  | 1 | 1 |
| [K].cSYTEDAQcIDGTIEVpk.[C]        | N-Term(iTRAQ4plex); C1(Carbam  | 1 | 1 |
| [K].cSYTEDAQcIDGTIEVpk.[C]        | N-Term(iTRAQ4plex); C1(Carbam  | 1 | 1 |
| [R].kFicPLTGLWPINTlk.[C]          | K1(iTRAQ4plex); C4(Carbamidon  | 1 | 1 |
| [K].tFYEPGEEITYSckPGYVSR.[G]      | N-Term(iTRAQ4plex); C13(Carbar | 1 | 1 |
| [R].kFicPLTGLWPINTlk.[C]          | N-Term(iTRAQ4plex); K1(iTRAQ4  | 1 | 1 |
| [R].kFicPLTGLWPINTlk.[C]          | N-Term(iTRAQ4plex); K1(iTRAQ4  | 1 | 1 |
| [R].kFicPLTGLWPINTlk.[C]          | N-Term(iTRAQ4plex); C4(Carbam  | 1 | 1 |
| [R].kFicPLTGLWPINTlk.[C]          | N-Term(iTRAQ4plex); K1(iTRAQ4  | 1 | 1 |
| [R].kFicPLTGLWPINTlk.[C]          | N-Term(iTRAQ4plex); K1(iTRAQ4  | 1 | 1 |
| [K].tDASDVkPc.[-]                 | N-Term(iTRAQ4plex); K7(iTRAQ4  | 1 | 1 |
| [K].wSPELPVcAPIIcPPPSIPTFATLR.[V] | N-Term(iTRAQ4plex); C8(Carbam  | 1 | 1 |
| [K].wSPELPVcAPIIcPPPSIPTFATLR.[V] | N-Term(iTRAQ4plex); C8(Carbam  | 1 | 1 |
| [K].WSPELPVcAPIIcPPPSIPTFATLR.[V] | C8(Carbamidomethyl); C13(Carb  | 1 | 1 |
| [K].wSPELPVcAPIIcPPPSIPTFATLR.[V] | N-Term(iTRAQ4plex); C8(Carbam  | 1 | 1 |

|                               |                                |   |   |
|-------------------------------|--------------------------------|---|---|
| [K].ATVYQGER.[V]              |                                | 1 | 1 |
| [K].kcSYTEDAQcIDGTIEVPk.[C]   | N-Term(iTRAQ4plex); K1(iTRAQ4  | 1 | 1 |
| [K].TFYEPGEEITYSckPGYVSR.[G]  | C13(Carbamidomethyl); K14(iTR  | 1 | 1 |
| [K].FicPLTGLWPINTLk.[C]       | C3(Carbamidomethyl); K15(iTRA  | 1 | 1 |
| [K].tFYEPGEEITYSckPGYVSR.[G]  | N-Term(iTRAQ4plex); C13(Carbar | 1 | 1 |
| [K].tFYEPGEEITYSckPGYVSR.[G]  | N-Term(iTRAQ4plex); C13(Carbar | 1 | 1 |
| [K].aTFGcHDGYSLDGPEEIEcTk.[L] | N-Term(iTRAQ4plex); C5(Carbam  | 1 | 1 |
| [K].aTFGcHDGYSLDGPEEIEcTk.[L] | N-Term(iTRAQ4plex); C5(Carbam  | 1 | 1 |
| [K].kATVYQGER.[V]             | N-Term(iTRAQ4plex); K1(iTRAQ4  | 1 | 1 |
| [R].TcPkPDDLFPSTVVPLk.[T]     | C2(Carbamidomethyl); K4(iTRAC  | 1 | 1 |
| [K].aTFGcHDGYSLDGPEEIEcTk.[L] | N-Term(iTRAQ4plex); C5(Carbam  | 1 | 1 |
| [R].tcPkPDDLFPSTVVPLk.[T]     | N-Term(iTRAQ4plex); C2(Carbam  | 1 | 1 |
| [K].aTFGcHDGYSLDGPEEIEcTk.[L] | N-Term(iTRAQ4plex); C5(Carbam  | 1 | 1 |
| [K].nGmLHGDK.[V]              | N-Term(iTRAQ4plex); M3(Oxidati | 1 | 1 |
| [K].aTVYQGER.[V]              | N-Term(iTRAQ4plex)             | 1 | 1 |
| [K].aTVYQGER.[V]              | N-Term(iTRAQ4plex)             | 1 | 1 |
| [K].TDASDVkPc.[-]             | K7(iTRAQ4plex); C9(Carbamidon  | 1 | 1 |
| [K].TDASDVkPc.[-]             | K7(iTRAQ4plex); C9(Carbamidon  | 1 | 1 |
| [K].cFkEHSSLAfwk.[T]          | N-Term(iTRAQ4plex); C1(Carbam  | 1 | 1 |
| [R].tcPkPDDLFPSTVVPLk.[T]     | N-Term(iTRAQ4plex); C2(Carbam  | 1 | 1 |
| [R].tcPkPDDLFPSTVVPLk.[T]     | N-Term(iTRAQ4plex); C2(Carbam  | 1 | 1 |
| [R].tcPkPDDLFPSTVVPLk.[T]     | N-Term(iTRAQ4plex); C2(Carbam  | 1 | 1 |
| [K].tDASDVkPc.[-]             | N-Term(iTRAQ4plex); K7(iTRAQ4  | 1 | 1 |
| [K].aTVYQGER.[V]              | N-Term(iTRAQ4plex)             | 1 | 1 |
| [K].tDASDVkPc.[-]             | N-Term(iTRAQ4plex); K7(iTRAQ4  | 1 | 1 |
| [K].aTVYQGER.[V]              | N-Term(iTRAQ4plex)             | 1 | 1 |
| [R].TcPkPDDLFPSTVVPLk.[T]     | C2(Carbamidomethyl); K4(iTRAC  | 1 | 1 |
| [R].tcPkPDDLFPSTVVPLk.[T]     | N-Term(iTRAQ4plex); C2(Carbam  | 1 | 1 |
| [K].IGNWSAMPsck.[A]           | N-Term(iTRAQ4plex); C10(Carbar | 1 | 1 |
| [K].tDASDVkPc.[-]             | N-Term(iTRAQ4plex); K7(iTRAQ4  | 1 | 1 |
| [K].aTFGcHDGYSLDGPEEIEcTk.[L] | N-Term(iTRAQ4plex); C5(Carbam  | 1 | 1 |
| [K].nGMLHGDK.[V]              | N-Term(iTRAQ4plex); K8(iTRAQ4  | 1 | 1 |
| [K].tDASDVkPc.[-]             | N-Term(iTRAQ4plex); K7(iTRAQ4  | 1 | 1 |
| [K].tDASDVkPc.[-]             | N-Term(iTRAQ4plex); K7(iTRAQ4  | 1 | 1 |
| [K].aTVYQGER.[V]              | N-Term(iTRAQ4plex)             | 1 | 1 |
| [K].tDASDVkPc.[-]             | N-Term(iTRAQ4plex); K7(iTRAQ4  | 1 | 1 |
| [R].tcPkPDDLFPSTVVPLk.[T]     | N-Term(iTRAQ4plex); C2(Carbam  | 1 | 1 |
| [R].TcPkPDDLFPSTVVPLk.[T]     | C2(Carbamidomethyl); K4(iTRAC  | 1 | 1 |
| [K].eHSSLAfwk.[T]             | N-Term(iTRAQ4plex); K9(iTRAQ4  | 1 | 1 |
| [K].ATVYQGER.[V]              |                                | 1 | 1 |
| [R].kFicPLTGLWPINTLk.[C]      | N-Term(iTRAQ4plex); C4(Carbam  | 1 | 1 |
| [R].kFicPLTGLWPINTLk.[C]      | K1(iTRAQ4plex); C4(Carbamidon  | 1 | 1 |
| [K].ATVYQGER.[V]              |                                | 1 | 1 |
| [R].tcPkPDDLFPSTVVPLk.[T]     | N-Term(iTRAQ4plex); C2(Carbam  | 1 | 1 |
| [R].TcPkPDDLFPSTVVPLk.[T]     | C2(Carbamidomethyl); K4(iTRAC  | 1 | 1 |
| [R].tcPkPDDLFPSTVVPLk.[T]     | N-Term(iTRAQ4plex); C2(Carbam  | 1 | 1 |
| [K].aTVYQGER.[V]              | N-Term(iTRAQ4plex)             | 1 | 1 |
| [R].tcPkPDDLFPSTVVPLk.[T]     | N-Term(iTRAQ4plex); C2(Carbam  | 1 | 1 |
| [R].TcPkPDDLFPSTVVPLk.[T]     | C2(Carbamidomethyl); K4(iTRAC  | 1 | 1 |
| [K].aTFGcHDGYSLDGPEEIEcTk.[L] | N-Term(iTRAQ4plex); C5(Carbam  | 1 | 1 |
| [R].tcPkPDDLFPSTVVPLk.[T]     | N-Term(iTRAQ4plex); C2(Carbam  | 1 | 1 |
| [R].dWHGVPGQVDAAMAGR.[I]      | N-Term(iTRAQ4plex)             | 1 | 1 |

|                                   |                               |   |   |
|-----------------------------------|-------------------------------|---|---|
| [R].dWHGVPGQVDAAMAGR.[I]          | N-Term(iTRAQ4plex)            | 1 | 1 |
| [R].dWHGVPGQVDAAMAGR.[I]          | N-Term(iTRAQ4plex)            | 1 | 1 |
| [R].dWHGVPGQVDAAMAGR.[I]          | N-Term(iTRAQ4plex)            | 1 | 1 |
| [R].dWHGVPGQVDAAMAGR.[I]          | N-Term(iTRAQ4plex)            | 1 | 1 |
| [R].dWHGVPGQVDAAMAGR.[I]          | N-Term(iTRAQ4plex)            | 1 | 1 |
| [R].dWHGVPGQVDAAMAGR.[I]          | N-Term(iTRAQ4plex)            | 1 | 1 |
| [R].dWHGVPGQVDAAMAGR.[I]          | N-Term(iTRAQ4plex)            | 1 | 1 |
| [R].IYISGMAPRPSLAK.[K]            | K14(iTRAQ4plex)               | 1 | 1 |
| [R].dWHGVPGQVDAAMAGR.[I]          | N-Term(iTRAQ4plex)            | 1 | 1 |
| [K].aVRPGYPk.[L]                  | N-Term(iTRAQ4plex); K8(iTRAQ4 | 1 | 1 |
| [R].fEDGVLPDPYPR.[N]              | N-Term(iTRAQ4plex)            | 1 | 1 |
| [R].fEDGVLPDPYPR.[N]              | N-Term(iTRAQ4plex)            | 1 | 1 |
| [R].dWHGVPGQVDAAMAGR.[I]          | N-Term(iTRAQ4plex); M13(Oxida | 1 | 1 |
| [R].dWHGVPGQVDAAMAGR.[I]          | N-Term(iTRAQ4plex)            | 1 | 1 |
| [K].aVRPGYPk.[L]                  | N-Term(iTRAQ4plex); K8(iTRAQ4 | 1 | 1 |
| [R].iYISGMAPRPSLAK.[K]            | N-Term(iTRAQ4plex); K14(iTRAQ | 1 | 1 |
| [R].DVWGIEGPIDAAFTR.[I]           |                               | 1 | 1 |
| [R].fEDGVLPDPYPR.[N]              | N-Term(iTRAQ4plex)            | 1 | 1 |
| [R].fEDGVLPDPYPR.[N]              | N-Term(iTRAQ4plex)            | 1 | 1 |
| [R].fEDGVLPDPYPR.[N]              | N-Term(iTRAQ4plex)            | 1 | 1 |
| [R].fEDGVLPDPYPR.[N]              | N-Term(iTRAQ4plex)            | 1 | 1 |
| [R].fEDGVLPDPYPR.[N]              | N-Term(iTRAQ4plex)            | 1 | 1 |
| [R].fEDGVLPDPYPR.[N]              | N-Term(iTRAQ4plex)            | 1 | 1 |
| [R].fEDGVLPDPYPR.[N]              | N-Term(iTRAQ4plex)            | 1 | 1 |
| [R].sIAQYWLGCpAPGHL.[-]           | N-Term(iTRAQ4plex); C9(Carbam | 1 | 1 |
| [R].FEDGVLPDPYPR.[N]              |                               | 1 | 1 |
| [R].FEDGVLPDPYPR.[N]              |                               | 1 | 1 |
| [R].cTEGFNVdk.[K]                 | N-Term(iTRAQ4plex); C1(Carbam | 1 | 1 |
| [R].gQYcYELDEk.[A]                | N-Term(iTRAQ4plex); C4(Carbam | 1 | 1 |
| [R].rVDTVDPYPR.[S]                | N-Term(iTRAQ4plex)            | 1 | 1 |
| [R].rVDTVDPYPR.[S]                | N-Term(iTRAQ4plex)            | 1 | 1 |
| [R].cTEGFNVdk.[K]                 | N-Term(iTRAQ4plex); C1(Carbam | 1 | 1 |
| [R].rVDTVDPYPR.[S]                | N-Term(iTRAQ4plex)            | 1 | 1 |
| [R].rVDTVDPYPR.[S]                | N-Term(iTRAQ4plex)            | 1 | 1 |
| [R].rVDTVDPYPR.[S]                | N-Term(iTRAQ4plex)            | 1 | 1 |
| [R].tsAGTRQPQFISR.[D]             | N-Term(iTRAQ4plex)            | 1 | 1 |
| [R].mDWLVPATcEPIQSVFFSGDk.[Y]     | N-Term(iTRAQ4plex); M1(Oxidat | 1 | 1 |
| [R].DWHGVPGQVDAAMAGR.[I]          |                               | 1 | 1 |
| [R].mDWLVPATcEPIQSVFFSGDk.[Y]     | N-Term(iTRAQ4plex); C9(Carbam | 1 | 1 |
| [R].mDWLVPATcEPIQSVFFSGDk.[Y]     | N-Term(iTRAQ4plex); C9(Carbam | 1 | 1 |
| [R].rVDTVDPYPR.[S]                | N-Term(iTRAQ4plex)            | 1 | 1 |
| [R].gDVFTMPEDYTVYDDGEEK.[N]       | N-Term(iTRAQ4plex); K20(iTRAQ | 1 | 1 |
| [R].rVDTVDPYPR.[S]                | N-Term(iTRAQ4plex)            | 1 | 1 |
| [R].gQYcYELDEk.[A]                | N-Term(iTRAQ4plex); C4(Carbam | 1 | 1 |
| [K].cQcDELcSYQScTDYTAeckPQVTR.[G] | N-Term(iTRAQ4plex); C1(Carbam | 1 | 1 |
| [R].TSAGTRQPQFISR.[D]             |                               | 1 | 1 |
| [R].sIAQYWLGCpAPGHL.[-]           | N-Term(iTRAQ4plex); C9(Carbam | 1 | 1 |
| [R].cTEGFNVdk.[K]                 | N-Term(iTRAQ4plex); C1(Carbam | 1 | 1 |
| [R].vDTVDPYPR.[S]                 | N-Term(iTRAQ4plex)            | 1 | 1 |
| [R].RVDTVDPYPR.[S]                |                               | 1 | 1 |
| [K].aVRPGYPk.[L]                  | N-Term(iTRAQ4plex); K8(iTRAQ4 | 1 | 1 |
| [R].dWHGVPGQVDAAMAGR.[I]          | N-Term(iTRAQ4plex)            | 1 | 1 |
| [R].DWHGVPGQVDAAMAGR.[I]          |                               | 1 | 1 |
| [R].dVWGIEGPIDAAFTR.[I]           | N-Term(iTRAQ4plex)            | 1 | 1 |

|                          |                                |   |   |
|--------------------------|--------------------------------|---|---|
| [R].cTEGFNVdkk.[C]       | N-Term(iTRAQ4plex); C1(Carbam  | 1 | 1 |
| [R].DWHGVPGQVDAAMAGR.[I] |                                | 1 | 1 |
| [R].vDVTVDPPYPR.[S]      | N-Term(iTRAQ4plex)             | 1 | 1 |
| [R].RVDTVDPPYPR.[S]      |                                | 1 | 1 |
| [R].fEDGVLDPDYPR.[N]     | N-Term(iTRAQ4plex)             | 1 | 1 |
| [R].fEDGVLDPDYPR.[N]     | N-Term(iTRAQ4plex)             | 1 | 1 |
| [R].cTEGFNVdk.[K]        | C1(Carbamidomethyl); K9(iTRAC  | 1 | 1 |
| [R].dVWGIEGPIIDAAFTR.[I] | N-Term(iTRAQ4plex)             | 1 | 1 |
| [R].fEDGVLDPDYPR.[N]     | N-Term(iTRAQ4plex)             | 1 | 1 |
| [R].DWHGVPGQVDAAMAGR.[I] | M13(Oxidation)                 | 1 | 1 |
| [R].rVDTVDPPYPR.[S]      | N-Term(iTRAQ4plex)             | 1 | 1 |
| [R].gQYcYELDEK.[A]       | N-Term(iTRAQ4plex); C4(Carbam  | 1 | 1 |
| [R].RVDTVDPPYPR.[S]      |                                | 1 | 1 |
| [R].sIAQYWLGCpAPAGHL.[-] | N-Term(iTRAQ4plex); C9(Carbam  | 1 | 1 |
| [R].iYISGMARPSLAK.[K]    | N-Term(iTRAQ4plex); K14(iTRAQ  | 1 | 1 |
| [R].RVDTVDPPYPR.[S]      |                                | 1 | 1 |
| [R].gQYcYELDEK.[A]       | N-Term(iTRAQ4plex); C4(Carbam  | 1 | 1 |
| [R].iYISGMARPSLAK.[K]    | N-Term(iTRAQ4plex); K14(iTRAQ  | 1 | 1 |
| [R].DWHGVPGQVDAAMAGR.[I] |                                | 1 | 1 |
| [R].dVWGIEGPIIDAAFTR.[I] | N-Term(iTRAQ4plex)             | 1 | 1 |
| [K].aVRPGYPk.[L]         | N-Term(iTRAQ4plex); K8(iTRAQ4  | 1 | 1 |
| [K].IicQATGFSPR.[Q]      | N-Term(iTRAQ4plex); C3(Carbam  | 1 | 2 |
| [K].IicQATGFSPR.[Q]      | N-Term(iTRAQ4plex); C3(Carbam  | 1 | 2 |
| [K].gVALHRPDVYLLPPAR.[E] | N-Term(iTRAQ4plex)             | 1 | 2 |
| [K].gVALHRPDVYLLPPAR.[E] | N-Term(iTRAQ4plex)             | 1 | 2 |
| [K].gVALHRPDVYLLPPAR.[E] | N-Term(iTRAQ4plex)             | 1 | 2 |
| [K].IicQATGFSPR.[Q]      | C3(Carbamidomethyl)            | 1 | 2 |
| [K].nVPLPVIAELPPk.[V]    | N-Term(iTRAQ4plex); K13(iTRAQ  | 1 | 1 |
| [K].nVPLPVIAELPPk.[V]    | N-Term(iTRAQ4plex); K13(iTRAQ  | 1 | 1 |
| [R].fTcTVHTDLPSPLk.[Q]   | N-Term(iTRAQ4plex); C3(Carbam  | 1 | 2 |
| [R].fTcTVHTDLPSPLk.[Q]   | N-Term(iTRAQ4plex); C3(Carbam  | 1 | 2 |
| [K].yAATSQVLLPSk.[D]     | N-Term(iTRAQ4plex); K12(iTRAQ  | 1 | 1 |
| [K].dVMQGTDEHVvck.[V]    | N-Term(iTRAQ4plex); C12(Carbar | 1 | 1 |
| [K].qVGSVTTDQVQAEAK.[E]  | N-Term(iTRAQ4plex); K16(iTRAQ  | 1 | 1 |
| [K].qVGSVTTDQVQAEAK.[E]  | N-Term(iTRAQ4plex); K16(iTRAQ  | 1 | 1 |
| [K].dVmQGTDEHVvck.[V]    | N-Term(iTRAQ4plex); M3(Oxidati | 1 | 1 |
| [K].dVMQGTDEHVvck.[V]    | N-Term(iTRAQ4plex); C12(Carbar | 1 | 1 |
| [R].vFAIPPSFASIFLtk.[S]  | N-Term(iTRAQ4plex); K15(iTRAQ  | 1 | 2 |
| [K].yVTSAPMPEPQAPGR.[Y]  | N-Term(iTRAQ4plex)             | 1 | 2 |
| [K].eSGPTTYk.[V]         | N-Term(iTRAQ4plex); K8(iTRAQ4  | 1 | 2 |
| [K].vTSTLTik.[E]         | N-Term(iTRAQ4plex); K8(iTRAQ4  | 1 | 2 |
| [R].GQPLSPEk.[Y]         | K8(iTRAQ4plex)                 | 1 | 2 |
| [R].gQPLSPEk.[Y]         | N-Term(iTRAQ4plex); K8(iTRAQ4  | 1 | 2 |
| [K].dVMQGTDEHVvck.[V]    | N-Term(iTRAQ4plex); C12(Carbar | 1 | 1 |
| [K].eSGPTTYk.[V]         | N-Term(iTRAQ4plex); K8(iTRAQ4  | 1 | 2 |
| [K].yAATSQVLLPSk.[D]     | N-Term(iTRAQ4plex); K12(iTRAQ  | 1 | 1 |
| [R].vFAIPPSFASIFLtk.[S]  | N-Term(iTRAQ4plex); K15(iTRAQ  | 1 | 2 |
| [K].nVPLPVIAELPPk.[V]    | N-Term(iTRAQ4plex); K13(iTRAQ  | 1 | 1 |
| [K].VSVFVPPR.[D]         |                                | 1 | 2 |
| [K].yVTSAPMPEPQAPGR.[Y]  | N-Term(iTRAQ4plex)             | 1 | 2 |
| [K].nVPLPVIAELPPk.[V]    | N-Term(iTRAQ4plex); K13(iTRAQ  | 1 | 1 |
| [K].yAATSQVLLPSk.[D]     | N-Term(iTRAQ4plex); K12(iTRAQ  | 1 | 1 |

|                                   |                                |   |   |
|-----------------------------------|--------------------------------|---|---|
| [K].vTSTLTik.[E]                  | N-Term(iTRAQ4plex); K8(iTRAQ4  | 1 | 2 |
| [R].fTcTVTHTDLPSPk.[Q]            | N-Term(iTRAQ4plex); C3(Carbam  | 1 | 2 |
| [R].fTcTVTHTDLPSPk.[Q]            | N-Term(iTRAQ4plex); C3(Carbam  | 1 | 2 |
| [K].vSVFVPPR.[D]                  | N-Term(iTRAQ4plex)             | 1 | 2 |
| [R].GQPLSPEk.[Y]                  | K8(iTRAQ4plex)                 | 1 | 2 |
| [K].gVALHRPDVYLLPPAR.[E]          | N-Term(iTRAQ4plex)             | 1 | 2 |
| [K].nVPLPVIAELPPk.[V]             | N-Term(iTRAQ4plex); K13(iTRAQ  | 1 | 1 |
| [R].fTcTVTHTDLPSPk.[Q]            | N-Term(iTRAQ4plex); C3(Carbam  | 1 | 2 |
| [K].nVPLPVIAELPPk.[V]             | N-Term(iTRAQ4plex); K13(iTRAQ  | 1 | 1 |
| [R].gQPLSPEk.[Y]                  | N-Term(iTRAQ4plex); K8(iTRAQ4  | 1 | 2 |
| [K].vQHPNGNk.[E]                  | N-Term(iTRAQ4plex); K8(iTRAQ4  | 1 | 1 |
| [K].vSVFVPPR.[D]                  | N-Term(iTRAQ4plex)             | 1 | 2 |
| [K].vTSTLTik.[E]                  | N-Term(iTRAQ4plex); K8(iTRAQ4  | 1 | 2 |
| [R].eGKQVGSVTTDQVQAEAk.[E]        | N-Term(iTRAQ4plex); K19(iTRAQ  | 1 | 1 |
| [R].EGkQVGSVTTDQVQAEAk.[E]        | K3(iTRAQ4plex); K19(iTRAQ4ple  | 1 | 1 |
| [K].vTSTLTik.[E]                  | N-Term(iTRAQ4plex); K8(iTRAQ4  | 1 | 2 |
| [K].qVGSVTTDQVQAEAk.[E]           | N-Term(iTRAQ4plex); K16(iTRAQ  | 1 | 1 |
| [K].vSVFVPPR.[D]                  | N-Term(iTRAQ4plex)             | 1 | 2 |
| [R].gQPLSPEk.[Y]                  | N-Term(iTRAQ4plex); K8(iTRAQ4  | 1 | 2 |
| [K].vSVFVPPR.[D]                  | N-Term(iTRAQ4plex)             | 1 | 2 |
| [K].vSVFVPPR.[D]                  | N-Term(iTRAQ4plex)             | 1 | 2 |
| [K].rLPLEYSYGEYR.[D]              | N-Term(iTRAQ4plex)             | 1 | 1 |
| [K].rLPLEYSYGEYR.[D]              | N-Term(iTRAQ4plex)             | 1 | 1 |
| [K].sGFSFGfk.[I]                  | N-Term(iTRAQ4plex); K8(iTRAQ4  | 1 | 1 |
| [R].cDcIcPVGSQGLAcEVSyr.[K]       | N-Term(iTRAQ4plex); C1(Carbam  | 1 | 1 |
| [R].cDcIcPVGSQGLAcEVSyr.[K]       | N-Term(iTRAQ4plex); C1(Carbam  | 1 | 1 |
| [R].yAYLLQPSQFHGEPcNFSDk.[E]      | N-Term(iTRAQ4plex); C15(Carbar | 1 | 1 |
| [R].yAYLLQPSQFHGEPcNFSDk.[E]      | N-Term(iTRAQ4plex); C15(Carbar | 1 | 1 |
| [R].gGASEHITTLAYQELPTADLMQEWGDAVC | N-Term(iTRAQ4plex); K36(iTRAQ  | 1 | 1 |
| [K].rLPLEYSYGEYR.[D]              | N-Term(iTRAQ4plex)             | 1 | 1 |
| [K].vEPLYELVTATDFAYSSTVR.[Q]      | N-Term(iTRAQ4plex)             | 1 | 1 |
| [R].dFGTHYTEAVLGGIYEYTLVMNk.[E]   | N-Term(iTRAQ4plex); K24(iTRAQ  | 1 | 1 |
| [K].eYESYDFER.[N]                 | N-Term(iTRAQ4plex)             | 1 | 1 |
| [K].eYESYDFER.[N]                 | N-Term(iTRAQ4plex)             | 1 | 1 |
| [K].eYESYDFER.[N]                 | N-Term(iTRAQ4plex)             | 1 | 1 |
| [R].IPLEYSYGEYR.[D]               | N-Term(iTRAQ4plex)             | 1 | 1 |
| [R].IPLEYSYGEYR.[D]               | N-Term(iTRAQ4plex)             | 1 | 1 |
| [K].sGFSFGfk.[I]                  | N-Term(iTRAQ4plex); K8(iTRAQ4  | 1 | 1 |
| [R].sDLEVAHYk.[L]                 | N-Term(iTRAQ4plex); K9(iTRAQ4  | 1 | 1 |
| [R].sLMLHYEFLQR.[V]               | N-Term(iTRAQ4plex)             | 1 | 1 |
| [R].sLMLHYEFLQR.[V]               | N-Term(iTRAQ4plex)             | 1 | 1 |
| [K].eYESYDFER.[N]                 | N-Term(iTRAQ4plex)             | 1 | 1 |
| [R].gILNEIk.[D]                   | N-Term(iTRAQ4plex); K7(iTRAQ4  | 1 | 1 |
| [R].gILNEIk.[D]                   | N-Term(iTRAQ4plex); K7(iTRAQ4  | 1 | 1 |
| [K].rLPLEYSYGEYR.[D]              | N-Term(iTRAQ4plex)             | 1 | 1 |
| [K].iPGIFELGISSQSDR.[G]           | N-Term(iTRAQ4plex)             | 1 | 1 |
| [K].sGFSFGfk.[I]                  | N-Term(iTRAQ4plex); K8(iTRAQ4  | 1 | 1 |
| [R].kPYNVESYTPQTQGk.[Y]           | N-Term(iTRAQ4plex); K1(iTRAQ4  | 1 | 1 |
| [R].cEGFVcAQTGR.[C]               | N-Term(iTRAQ4plex); C1(Carbam  | 1 | 1 |
| [R].kNTPIDGk.[W]                  | N-Term(iTRAQ4plex); K1(iTRAQ4  | 1 | 1 |
| [R].yAYLLQPSQFHGEPcNFSDk.[E]      | N-Term(iTRAQ4plex); C15(Carbar | 1 | 1 |
| [R].IPLEYSYGEYR.[D]               | N-Term(iTRAQ4plex)             | 1 | 1 |

|                               |                                |   |   |
|-------------------------------|--------------------------------|---|---|
| [R].sLmLHYEFLQR.[V]           | N-Term(iTRAQ4plex); M3(Oxidat  | 1 | 1 |
| [R].kNTPIDGk.[W]              | N-Term(iTRAQ4plex); K1(iTRAQ4  | 1 | 1 |
| [K].sGFSFGfk.[I]              | N-Term(iTRAQ4plex); K8(iTRAQ4  | 1 | 1 |
| [R].gGEGTGYFVDFSVR.[N]        | N-Term(iTRAQ4plex)             | 1 | 1 |
| [R].aDLFYDVEALDLESPk.[N]      | N-Term(iTRAQ4plex); K16(iTRAQ  | 1 | 1 |
| [R].aDLFYDVEALDLESPk.[N]      | N-Term(iTRAQ4plex); K16(iTRAQ  | 1 | 1 |
| [R].sSTTkPPFkPHGSR.[D]        | N-Term(iTRAQ4plex); K5(iTRAQ4  | 1 | 1 |
| [K].dSPVLIDFFEDTER.[Y]        | N-Term(iTRAQ4plex)             | 1 | 1 |
| [K].dSPVLIDFFEDTER.[Y]        | N-Term(iTRAQ4plex)             | 1 | 1 |
| [R].sSTTkPPFkPHGSR.[D]        | N-Term(iTRAQ4plex); K5(iTRAQ4  | 1 | 1 |
| [R].SSTTkPPFkPHGSR.[D]        | K5(iTRAQ4plex); K9(iTRAQ4plex) | 1 | 1 |
| [K].DSPVLIDFFEDTER.[Y]        |                                | 1 | 1 |
| [K].dSPVLIDFFEDTER.[Y]        | N-Term(iTRAQ4plex)             | 1 | 1 |
| [K].dSPVLIDFFEDTER.[Y]        | N-Term(iTRAQ4plex)             | 1 | 1 |
| [R].aDLFYDVEALDLESPk.[N]      | N-Term(iTRAQ4plex); K16(iTRAQ  | 1 | 1 |
| [R].aDLFYDVEALDLESPk.[N]      | N-Term(iTRAQ4plex); K16(iTRAQ  | 1 | 1 |
| [R].aDLFYDVEALDLESPk.[N]      | N-Term(iTRAQ4plex); K16(iTRAQ  | 1 | 1 |
| [R].ADLFYDVEALDLESPk.[N]      | K16(iTRAQ4plex)                | 1 | 1 |
| [R].ADLFYDVEALDLESPk.[N]      | K16(iTRAQ4plex)                | 1 | 1 |
| [R].sSTTkPPFkPHGSR.[D]        | N-Term(iTRAQ4plex); K5(iTRAQ4  | 1 | 1 |
| [R].rPSEIVIGQck.[V]           | N-Term(iTRAQ4plex); C10(Carbar | 1 | 1 |
| [R].aDLFYDVEALDLESPk.[N]      | N-Term(iTRAQ4plex); K16(iTRAQ  | 1 | 1 |
| [R].hPNVFGFcR.[A]             | N-Term(iTRAQ4plex); C8(Carbam  | 1 | 1 |
| [R].hPNVFGFcR.[A]             | N-Term(iTRAQ4plex); C8(Carbam  | 1 | 1 |
| [K].yKEENDDFASFR.[V]          | N-Term(iTRAQ4plex); K2(iTRAQ4  | 1 | 1 |
| [K].yKEENDDFASFR.[V]          | N-Term(iTRAQ4plex); K2(iTRAQ4  | 1 | 1 |
| [R].kGEVLPLPEANFPSFPLPHhk.[H] | N-Term(iTRAQ4plex); K1(iTRAQ4  | 1 | 1 |
| [R].kGEVLPLPEANFPSFPLPHhk.[H] | N-Term(iTRAQ4plex); K1(iTRAQ4  | 1 | 1 |
| [R].kGEVLPLPEANFPSFPLPHhk.[H] | N-Term(iTRAQ4plex); K1(iTRAQ4  | 1 | 1 |
| [R].kGEVLPLPEANFPSFPLPHhk.[H] | N-Term(iTRAQ4plex); K1(iTRAQ4  | 1 | 1 |
| [R].kGEVLPLPEANFPSFPLPHhk.[H] | N-Term(iTRAQ4plex); K1(iTRAQ4  | 1 | 1 |
| [R].kYWNDcEPPDSR.[R]          | N-Term(iTRAQ4plex); K1(iTRAQ4  | 1 | 1 |
| [R].hSHESQDLR.[V]             | N-Term(iTRAQ4plex)             | 1 | 1 |
| [R].kYWNDcEPPDSR.[R]          | N-Term(iTRAQ4plex); K1(iTRAQ4  | 1 | 1 |
| [R].kYWNDcEPPDSR.[R]          | N-Term(iTRAQ4plex); K1(iTRAQ4  | 1 | 1 |
| [K].sGFQVSMFFHTFPk.[-]        | N-Term(iTRAQ4plex); K16(iTRAQ  | 1 | 1 |
| [K].gEVLPLPEANFPSFPLPHhk.[H]  | N-Term(iTRAQ4plex); K20(iTRAQ  | 1 | 1 |
| [K].yWNDcEPPDSR.[R]           | N-Term(iTRAQ4plex); C5(Carbam  | 1 | 1 |
| [K].yKEENDDFASFR.[V]          | N-Term(iTRAQ4plex); K2(iTRAQ4  | 1 | 1 |
| [R].hSHESQDLR.[V]             | N-Term(iTRAQ4plex)             | 1 | 1 |
| [R].hSHESQDLR.[V]             | N-Term(iTRAQ4plex)             | 1 | 1 |
| [R].RPSEIVIGQck.[V]           | C10(Carbamidomethyl); K11(iTR  | 1 | 1 |
| [R].rPSEIVIGQck.[V]           | N-Term(iTRAQ4plex); C10(Carbar | 1 | 1 |
| [R].rPSEIVIGQck.[V]           | N-Term(iTRAQ4plex); C10(Carbar | 1 | 1 |
| [R].rPSEIVIGQck.[V]           | N-Term(iTRAQ4plex); C10(Carbar | 1 | 1 |
| [K].hPLkPDNQFPQSVSEScPGk.[F]  | N-Term(iTRAQ4plex); K4(iTRAQ4  | 1 | 1 |
| [K].hPLkPDNQFPQSVSEScPGk.[F]  | N-Term(iTRAQ4plex); K4(iTRAQ4  | 1 | 1 |
| [K].hPLkPDNQFPQSVSEScPGk.[F]  | N-Term(iTRAQ4plex); K4(iTRAQ4  | 1 | 1 |
| [R].rDGyLFQLLR.[I]            | N-Term(iTRAQ4plex)             | 1 | 1 |
| [K].hPLkPDNQFPQSVSEScPGk.[F]  | N-Term(iTRAQ4plex); K4(iTRAQ4  | 1 | 1 |
| [R].hPNVFGFcR.[A]             | N-Term(iTRAQ4plex); C8(Carbam  | 1 | 1 |
| [K].hPLkPDNQFPQSVSEScPGk.[F]  | N-Term(iTRAQ4plex); K4(iTRAQ4  | 1 | 1 |



|                              |                                          |   |   |
|------------------------------|------------------------------------------|---|---|
| [K].sGFPQVSMFFHTFPk.[-]      | N-Term(iTRAQ4plex); K16(iTRAQ4plex)      | 1 | 1 |
| [R].rPSEIVIGQck.[V]          | N-Term(iTRAQ4plex); C10(Carbamidomethyl) | 1 | 1 |
| [R].rPSEIVIGQck.[V]          | N-Term(iTRAQ4plex); C10(Carbamidomethyl) | 1 | 1 |
| [R].kYWNDcEPPDSR.[R]         | N-Term(iTRAQ4plex); K1(iTRAQ4plex)       | 1 | 1 |
| [K].sGFPQVSMFFHTFPk.[-]      | N-Term(iTRAQ4plex); K16(iTRAQ4plex)      | 1 | 1 |
| [R].hPNVFGFcR.[A]            | N-Term(iTRAQ4plex); C8(Carbamidomethyl)  | 1 | 1 |
| [K].aLDLINK.[R]              | N-Term(iTRAQ4plex); K7(iTRAQ4plex)       | 1 | 1 |
| [K].aLDLINK.[R]              | N-Term(iTRAQ4plex); K7(iTRAQ4plex)       | 1 | 1 |
| [K].yWNDcEPPDSR.[R]          | N-Term(iTRAQ4plex); C5(Carbamidomethyl)  | 1 | 1 |
| [K].yWNDcEPPDSR.[R]          | N-Term(iTRAQ4plex); C5(Carbamidomethyl)  | 1 | 1 |
| [R].gGEGTGYFVDFSVR.[N]       | N-Term(iTRAQ4plex)                       | 1 | 1 |
| [R].hPNVFGFcR.[A]            | N-Term(iTRAQ4plex); C8(Carbamidomethyl)  | 1 | 1 |
| [R].HSHEsqDLR.[V]            |                                          | 1 | 1 |
| [K].aLDLINK.[R]              | N-Term(iTRAQ4plex); K7(iTRAQ4plex)       | 1 | 1 |
| [R].hPNVFGFcR.[A]            | N-Term(iTRAQ4plex); C8(Carbamidomethyl)  | 1 | 1 |
| [R].kYWNDcEPPDSR.[R]         | N-Term(iTRAQ4plex); K1(iTRAQ4plex)       | 1 | 1 |
| [K].aLDLINK.[R]              | N-Term(iTRAQ4plex); K7(iTRAQ4plex)       | 1 | 1 |
| [K].aLDLINK.[R]              | N-Term(iTRAQ4plex); K7(iTRAQ4plex)       | 1 | 1 |
| [R].HPNVFGFcR.[A]            | C8(Carbamidomethyl)                      | 1 | 1 |
| [R].HSHEsqDLR.[V]            |                                          | 1 | 1 |
| [K].gEVLPLPEANFPSFPLPHhk.[H] | N-Term(iTRAQ4plex); K20(iTRAQ4plex)      | 1 | 1 |
| [R].hPNVFGFcR.[A]            | N-Term(iTRAQ4plex); C8(Carbamidomethyl)  | 1 | 1 |
| [R].gGEGTGYFVDFSVR.[N]       | N-Term(iTRAQ4plex)                       | 1 | 1 |
| [R].iADAHLDR.[V]             | N-Term(iTRAQ4plex)                       | 1 | 1 |
| [R].iADAHLDR.[V]             |                                          | 1 | 1 |
| [K].aLDLINK.[R]              | N-Term(iTRAQ4plex); K7(iTRAQ4plex)       | 1 | 1 |
| [K].yKEENDDFASFR.[V]         | N-Term(iTRAQ4plex); K2(iTRAQ4plex)       | 1 | 1 |
| [R].gGEGTGYFVDFSVR.[N]       | N-Term(iTRAQ4plex)                       | 1 | 1 |
| [R].HPNVFGFcR.[A]            | C8(Carbamidomethyl)                      | 1 | 1 |
| [K].aLDLINK.[R]              | N-Term(iTRAQ4plex); K7(iTRAQ4plex)       | 1 | 1 |
| [R].gGEGTGYFVDFSVR.[N]       | N-Term(iTRAQ4plex)                       | 1 | 1 |
| [R].kYWNDcEPPDSR.[R]         | N-Term(iTRAQ4plex); K1(iTRAQ4plex)       | 1 | 1 |
| [R].hSHESQDLR.[V]            | N-Term(iTRAQ4plex)                       | 1 | 1 |
| [K].aLDLINK.[R]              | N-Term(iTRAQ4plex); K7(iTRAQ4plex)       | 1 | 1 |
| [R].iADAHLDR.[V]             | N-Term(iTRAQ4plex)                       | 1 | 1 |
| [R].DTDTGALLFIGk.[I]         | K12(iTRAQ4plex)                          | 1 | 1 |
| [K].tVQAVLTVPk.[L]           | N-Term(iTRAQ4plex); K10(iTRAQ4plex)      | 1 | 1 |
| [K].tVQAVLTVPk.[L]           | N-Term(iTRAQ4plex); K10(iTRAQ4plex)      | 1 | 1 |
| [K].tVQAVLTVPk.[L]           | N-Term(iTRAQ4plex); K10(iTRAQ4plex)      | 1 | 1 |
| [K].IQSLFDSPDFSk.[I]         | N-Term(iTRAQ4plex); K12(iTRAQ4plex)      | 1 | 1 |
| [K].IQSLFDSPDFSk.[I]         | N-Term(iTRAQ4plex); K12(iTRAQ4plex)      | 1 | 1 |
| [K].IQSLFDSPDFSk.[I]         | N-Term(iTRAQ4plex); K12(iTRAQ4plex)      | 1 | 1 |
| [R].aLYYDLISSPDIHGTYk.[E]    | N-Term(iTRAQ4plex); K17(iTRAQ4plex)      | 1 | 1 |
| [K].LQSLFDSPDFSk.[I]         | K12(iTRAQ4plex)                          | 1 | 1 |
| [R].dTDGALLFIGk.[I]          | N-Term(iTRAQ4plex); K12(iTRAQ4plex)      | 1 | 1 |
| [R].dTDGALLFIGk.[I]          | N-Term(iTRAQ4plex); K12(iTRAQ4plex)      | 1 | 1 |
| [R].aLYYDLISSPDIHGTYk.[E]    | N-Term(iTRAQ4plex); K17(iTRAQ4plex)      | 1 | 1 |
| [R].aLYYDLISSPDIHGTYk.[E]    | N-Term(iTRAQ4plex); K17(iTRAQ4plex)      | 1 | 1 |
| [R].aLYYDLISSPDIHGTYk.[E]    | N-Term(iTRAQ4plex); K17(iTRAQ4plex)      | 1 | 1 |
| [K].tSLEDfYLDEER.[T]         | N-Term(iTRAQ4plex)                       | 1 | 1 |
| [K].tSLEDfYLDEER.[T]         | N-Term(iTRAQ4plex)                       | 1 | 1 |
| [K].tSLEDfYLDEER.[T]         | N-Term(iTRAQ4plex)                       | 1 | 1 |

|                                      |                                |   |   |
|--------------------------------------|--------------------------------|---|---|
| [K].ISYEGETk.[S]                     | N-Term(iTRAQ4plex); K9(iTRAQ4  | 1 | 1 |
| [K].IAAAVSNFGYDLYR.[V]               | N-Term(iTRAQ4plex)             | 1 | 1 |
| [K].iAQLPLTGSMsIIFLPLk.[V]           | N-Term(iTRAQ4plex); K19(iTRAQ4 | 1 | 1 |
| [K].eIPDEISILLGLVAHFk.[G]            | N-Term(iTRAQ4plex); K17(iTRAQ4 | 1 | 1 |
| [R].sSTSPTTNVLLSPLSVATALSALSGLAEQR.[ | N-Term(iTRAQ4plex)             | 1 | 1 |
| [K].eLLDVTAPQk.[N]                   | N-Term(iTRAQ4plex); K11(iTRAQ4 | 1 | 1 |
| [R].kTSLEDFYLDEER.[T]                | N-Term(iTRAQ4plex); K1(iTRAQ4  | 1 | 1 |
| [R].kTSLEDFYLDEER.[T]                | N-Term(iTRAQ4plex); K1(iTRAQ4  | 1 | 1 |
| [K].ISYEGETk.[S]                     | N-Term(iTRAQ4plex); K9(iTRAQ4  | 1 | 1 |
| [R].IDLQEINNWWVQAQmk.[G]             | N-Term(iTRAQ4plex); K15(iTRAQ4 | 1 | 1 |
| [K].TSLEDFYLDEER.[T]                 |                                | 1 | 1 |
| [K].sSFVAPLEk.[S]                    | N-Term(iTRAQ4plex); K9(iTRAQ4  | 1 | 1 |
| [R].dTDTGALLFIGk.[I]                 | N-Term(iTRAQ4plex); K12(iTRAQ4 | 1 | 1 |
| [K].IAAAVSNFGYDLYR.[V]               | N-Term(iTRAQ4plex)             | 1 | 1 |
| [K].sSFVAPLEk.[S]                    | N-Term(iTRAQ4plex); K9(iTRAQ4  | 1 | 1 |
| [K].iTGkPIk.[L]                      | N-Term(iTRAQ4plex); K4(iTRAQ4  | 1 | 1 |
| [R].yGLDSDLScK.[I]                   | N-Term(iTRAQ4plex); C9(Carbam  | 1 | 1 |
| [K].tSLEDFYLDEER.[T]                 | N-Term(iTRAQ4plex)             | 1 | 1 |
| [K].iTGkPIk.[L]                      | N-Term(iTRAQ4plex); K4(iTRAQ4  | 1 | 1 |
| [R].DTDTGALLFIGk.[I]                 | K12(iTRAQ4plex)                | 1 | 1 |
| [R].IDLQEINNWWVQAQmKKGK.[L]          | N-Term(iTRAQ4plex); M14(Oxida  | 1 | 1 |
| [R].kTSLEDFYLDEER.[T]                | N-Term(iTRAQ4plex)             | 1 | 1 |
| [R].kTSLEDFYLDEER.[T]                | K1(iTRAQ4plex)                 | 1 | 1 |
| [K].iTGkPIk.[L]                      | N-Term(iTRAQ4plex); K4(iTRAQ4  | 1 | 1 |
| [K].ISYEGETk.[S]                     | N-Term(iTRAQ4plex); K9(iTRAQ4  | 1 | 1 |
| [R].dTDTGALLFIGk.[I]                 | N-Term(iTRAQ4plex); K12(iTRAQ4 | 1 | 1 |
| [K].sSFVAPLEk.[S]                    | N-Term(iTRAQ4plex); K9(iTRAQ4  | 1 | 1 |
| [K].IQSLFDSPDFSk.[I]                 | N-Term(iTRAQ4plex); K12(iTRAQ4 | 1 | 1 |
| [K].tVQAVLTPk.[L]                    | N-Term(iTRAQ4plex); K10(iTRAQ4 | 1 | 1 |
| [R].iRPHTFTGLSGLR.[R]                | N-Term(iTRAQ4plex)             | 1 | 1 |
| [R].iRPHTFTGLSGLR.[R]                | N-Term(iTRAQ4plex)             | 1 | 1 |
| [R].iRPHTFTGLSGLR.[R]                | N-Term(iTRAQ4plex)             | 1 | 1 |
| [R].ISHNAIASLRPR.[T]                 | N-Term(iTRAQ4plex)             | 1 | 1 |
| [K].aNVFVQLPR.[L]                    | N-Term(iTRAQ4plex)             | 1 | 1 |
| [R].aFWLDVSHNR.[L]                   | N-Term(iTRAQ4plex)             | 1 | 1 |
| [R].aFWLDVSHNR.[L]                   | N-Term(iTRAQ4plex)             | 1 | 1 |
| [R].IWLEGNPWDcGcPLk.[A]              | N-Term(iTRAQ4plex); C10(Carbar | 1 | 1 |
| [K].ANVFVQLPR.[L]                    |                                | 1 | 1 |
| [R].AFWLDVSHNR.[L]                   |                                | 1 | 1 |
| [R].LSHNAIASLRPR.[T]                 |                                | 1 | 1 |
| [K].IHSLHLEGScLGR.[I]                | N-Term(iTRAQ4plex); C10(Carbar | 1 | 1 |
| [R].wLDLSHNR.[V]                     | N-Term(iTRAQ4plex)             | 1 | 1 |
| [R].wLDLSHNR.[V]                     | N-Term(iTRAQ4plex)             | 1 | 1 |
| [R].sFEGLGQLEVLTDHNQLQEVk.[A]        | N-Term(iTRAQ4plex); K22(iTRAQ4 | 1 | 1 |
| [R].sFEGLGQLEVLTDHNQLQEVk.[A]        | N-Term(iTRAQ4plex); K22(iTRAQ4 | 1 | 1 |
| [R].IAELPADALGPLQR.[A]               | N-Term(iTRAQ4plex)             | 1 | 1 |
| [R].IAELPADALGPLQR.[A]               | N-Term(iTRAQ4plex)             | 1 | 1 |
| [R].sFEGLGQLEVLTDHNQLQEVk.[A]        | N-Term(iTRAQ4plex); K22(iTRAQ4 | 1 | 1 |
| [R].LAELPADALGPLQR.[A]               |                                | 1 | 1 |
| [K].dLHFLEELQLGHNR.[I]               | N-Term(iTRAQ4plex)             | 1 | 1 |
| [R].nLIAAVAPGAFLGLk.[A]              | N-Term(iTRAQ4plex); K15(iTRAQ4 | 1 | 1 |
| [R].SLALGTFAHTPALASLGLSNNR.[L]       | N-Term(iTRAQ4plex)             | 1 | 1 |

|                                     |                                |   |   |
|-------------------------------------|--------------------------------|---|---|
| [R].vAGLLEDTFPGLLGLR.[V]            | N-Term(iTRAQ4plex)             | 1 | 1 |
| [R].vAGLLEDTFPGLLGLR.[V]            | N-Term(iTRAQ4plex)             | 1 | 1 |
| [R].tFTPQPPGLER.[L]                 | N-Term(iTRAQ4plex)             | 1 | 1 |
| [R].IAYLQPALFSGLAELR.[E]            | N-Term(iTRAQ4plex)             | 1 | 1 |
| [K].IHSLHLEGScLGR.[I]               | N-Term(iTRAQ4plex); C10(Carbar | 1 | 1 |
| [K].LEYLLLSR.[N]                    |                                | 1 | 1 |
| [R].IWLEGNPWDcGcPLk.[A]             | N-Term(iTRAQ4plex); C10(Carbar | 1 | 1 |
| [R].sFEGLGQLEVLTLHDHNLQEVk.[A]      | N-Term(iTRAQ4plex); K22(iTRAQ  | 1 | 1 |
| [R].sFEGLGQLEVLTLHDHNLQEVk.[A]      | N-Term(iTRAQ4plex); K22(iTRAQ  | 1 | 1 |
| [K].aNvFVQLPR.[L]                   | N-Term(iTRAQ4plex)             | 1 | 1 |
| [K].aNvFVQLPR.[L]                   | N-Term(iTRAQ4plex)             | 1 | 1 |
| [R].TFTPQPPGLER.[L]                 |                                | 1 | 1 |
| [R].iRPHTFTGLSGLR.[R]               | N-Term(iTRAQ4plex)             | 1 | 1 |
| [R].IFQGLGk.[L]                     | N-Term(iTRAQ4plex); K7(iTRAQ4  | 1 | 1 |
| [R].tFTPQPPGLER.[L]                 | N-Term(iTRAQ4plex)             | 1 | 1 |
| [R].aFWLDVSHNR.[L]                  | N-Term(iTRAQ4plex)             | 1 | 1 |
| [K].IHSLHLEGScLGR.[I]               | N-Term(iTRAQ4plex); C10(Carbar | 1 | 1 |
| [R].sFEGLGQLEVLTLHDHNLQEVk.[A]      | N-Term(iTRAQ4plex); K22(iTRAQ  | 1 | 1 |
| [R].tFTPQPPGLER.[L]                 | N-Term(iTRAQ4plex)             | 1 | 1 |
| [R].dVVQITcLDGFVVEGR.[V]            | N-Term(iTRAQ4plex); C7(Carbam  | 1 | 1 |
| [R].dVVQITcLDGFVVEGR.[V]            | N-Term(iTRAQ4plex); C7(Carbam  | 1 | 1 |
| [R].rEDFDVEAADSAGNcLDSL VFVAGDR.[Q] | N-Term(iTRAQ4plex); C15(Carbar | 1 | 1 |
| [R].rEDFDVEAADSAGNcLDSL VFVAGDR.[Q] | N-Term(iTRAQ4plex); C15(Carbar | 1 | 1 |
| [R].dVVQITcLDGFVVEGR.[V]            | N-Term(iTRAQ4plex); C7(Carbam  | 1 | 1 |
| [R].dVVQITcLDGFVVEGR.[V]            | N-Term(iTRAQ4plex); C7(Carbam  | 1 | 1 |
| [R].rEDFDVEAADSAGNcLDSL VFVAGDR.[Q] | N-Term(iTRAQ4plex); C15(Carbar | 1 | 1 |
| [K].sNALDIIFQDTLTGQk.[K]            | N-Term(iTRAQ4plex); K16(iTRAQ  | 1 | 1 |
| [K].sNALDIIFQDTLTGQk.[K]            | N-Term(iTRAQ4plex); K16(iTRAQ  | 1 | 1 |
| [R].qFGPYcGHGFPGPLNIETk.[S]         | N-Term(iTRAQ4plex); C6(Carbam  | 1 | 1 |
| [K].mLTPEHVFHHPGWk.[L]              | N-Term(iTRAQ4plex); M1(Oxidati | 1 | 1 |
| [K].vEDPESTLFGSVIR.[Y]              | N-Term(iTRAQ4plex)             | 1 | 1 |
| [K].nYVDWIMk.[T]                    | N-Term(iTRAQ4plex); K8(iTRAQ4  | 1 | 1 |
| [K].sNALDIIFQDTLTGQk.[K]            | N-Term(iTRAQ4plex); K16(iTRAQ  | 1 | 1 |
| [K].eDTPNSVWEPak.[A]                | N-Term(iTRAQ4plex); K12(iTRAQ  | 1 | 1 |
| [K].gDSGGAFAVQDPNDk.[T]             | N-Term(iTRAQ4plex); K15(iTRAQ  | 1 | 1 |
| [R].ePTMYVGSTSVQTSR.[L]             | N-Term(iTRAQ4plex)             | 1 | 1 |
| [R].iIGGSDADIk.[N]                  | N-Term(iTRAQ4plex); K10(iTRAQ  | 1 | 1 |
| [K].gFQVVVTLR.[R]                   | N-Term(iTRAQ4plex)             | 1 | 1 |
| [K].mLTPEHVFHHPGWk.[L]              | N-Term(iTRAQ4plex); K14(iTRAQ  | 1 | 1 |
| [R].tnFDNDIALVR.[L]                 | N-Term(iTRAQ4plex)             | 1 | 1 |
| [R].TNFDNDIALVR.[L]                 |                                | 1 | 1 |
| [R].sSNNPHSPIVEEFQVPYnk.[L]         | N-Term(iTRAQ4plex); K19(iTRAQ  | 1 | 1 |
| [R].yHGDPMPcPk.[E]                  | N-Term(iTRAQ4plex); C8(Carbam  | 1 | 1 |
| [K].gFQVVVTLR.[R]                   | N-Term(iTRAQ4plex)             | 1 | 1 |
| [R].qFGPYcGHGFPGPLNIETk.[S]         | N-Term(iTRAQ4plex); C6(Carbam  | 1 | 1 |
| [K].gDSGGAFAVQDPNDk.[T]             | N-Term(iTRAQ4plex); K15(iTRAQ  | 1 | 1 |
| [K].sNALDIIFQDTLTGQk.[K]            | N-Term(iTRAQ4plex); K16(iTRAQ  | 1 | 1 |
| [RK].sDFSNEER.[F]                   | N-Term(iTRAQ4plex)             | 2 | 2 |
| [R].sSNNPHSPIVEEFQVPYnk.[L]         | N-Term(iTRAQ4plex); K19(iTRAQ  | 1 | 1 |
| [K].gDSGGAFAVQDPNDk.[T]             | N-Term(iTRAQ4plex); K15(iTRAQ  | 1 | 1 |
| [K].gFQVVVTLR.[R]                   | N-Term(iTRAQ4plex)             | 1 | 1 |
| [K].gDSGGAFAVQDPNDk.[T]             | N-Term(iTRAQ4plex); K15(iTRAQ  | 1 | 1 |

|                                |                                |   |   |
|--------------------------------|--------------------------------|---|---|
| [R].dVVQITcLDGFVEVGR.[V]       | N-Term(iTRAQ4plex); C7(Carbam  | 1 | 1 |
| [R].iIGGSADiK.[N]              | N-Term(iTRAQ4plex); K10(iTRAQ  | 1 | 1 |
| [K].mLTPEHVIHPGwk.[L]          | N-Term(iTRAQ4plex); M1(Oxidati | 1 | 1 |
| [K].mLTPEHVIHPGwk.[L]          | N-Term(iTRAQ4plex); K14(iTRAQ  | 1 | 1 |
| [K].ILEVPEGR.[T]               | N-Term(iTRAQ4plex)             | 1 | 1 |
| [R].YHGDPMPcPk.[E]             | C8(Carbamidomethyl); K10(iTRA  | 1 | 1 |
| [R].TNFDNDIALVR.[L]            |                                | 1 | 1 |
| [K].gDSGGAFVQDPNDk.[T]         | N-Term(iTRAQ4plex); K15(iTRAQ  | 1 | 1 |
| [K].eDTPNSVWEPak.[A]           | N-Term(iTRAQ4plex); K12(iTRAQ  | 1 | 1 |
| [R].qFGPYcGHGFPGPLNIETk.[S]    | N-Term(iTRAQ4plex); C6(Carbam  | 1 | 1 |
| [K].gFQVVVTLR.[R]              | N-Term(iTRAQ4plex)             | 1 | 1 |
| [R].IPVAPLRk.[C]               | N-Term(iTRAQ4plex); K8(iTRAQ4  | 1 | 1 |
| [K].ILEVPEGR.[T]               | N-Term(iTRAQ4plex)             | 1 | 1 |
| [K].mLTPEHVIHPGwk.[L]          | N-Term(iTRAQ4plex); K14(iTRAQ  | 1 | 1 |
| [R].eANVAcLDLGFQQGADTQR.[R]    | N-Term(iTRAQ4plex); C6(Carbam  | 1 | 1 |
| [R].gLETSLAEcTFTk.[R]          | N-Term(iTRAQ4plex); C9(Carbam  | 1 | 1 |
| [R].gLETSLAEcTFTk.[R]          | N-Term(iTRAQ4plex); C9(Carbam  | 1 | 1 |
| [R].gLETSLAEcTFTk.[R]          | N-Term(iTRAQ4plex); C9(Carbam  | 1 | 1 |
| [R].eANVAcLDLGFQQGADTQR.[R]    | N-Term(iTRAQ4plex); C6(Carbam  | 1 | 1 |
| [R].eANVAcLDLGFQQGADTQR.[R]    | N-Term(iTRAQ4plex); C6(Carbam  | 1 | 1 |
| [R].iIFHENYNAGTYQNDIALIEMk.[K] | N-Term(iTRAQ4plex); K22(iTRAQ  | 1 | 1 |
| [R].tmGYQDFADVvcYTQk.[A]       | N-Term(iTRAQ4plex); M2(Oxidati | 1 | 1 |
| [R].tmGYQDFADVvcYTQk.[A]       | N-Term(iTRAQ4plex); C12(Carbar | 1 | 1 |
| [K].hGNTDSEGIVEVk.[L]          | N-Term(iTRAQ4plex); K13(iTRAQ  | 1 | 1 |
| [K].hGNTDSEGIVEVk.[L]          | N-Term(iTRAQ4plex); K13(iTRAQ  | 1 | 1 |
| [K].kYTHLScdk.[V]              | N-Term(iTRAQ4plex); K1(iTRAQ4  | 1 | 1 |
| [R].vFSLQWGEVk.[L]             | N-Term(iTRAQ4plex); K10(iTRAQ  | 1 | 1 |
| [K].yTHLScdk.[V]               | N-Term(iTRAQ4plex); C6(Carbam  | 1 | 1 |
| [K].emEcAGTYDGSIDAck.[G]       | N-Term(iTRAQ4plex); M2(Oxidati | 1 | 1 |
| [K].eMEcAGTYDGSIDAck.[G]       | N-Term(iTRAQ4plex); C4(Carbam  | 1 | 1 |
| [K].eMEcAGTYDGSIDAck.[G]       | N-Term(iTRAQ4plex); C4(Carbam  | 1 | 1 |
| [K].eMEcAGTYDGSIDAck.[G]       | N-Term(iTRAQ4plex); C4(Carbam  | 1 | 1 |
| [K].eMEcAGTYDGSIDAck.[G]       | N-Term(iTRAQ4plex); C4(Carbam  | 1 | 1 |
| [K].acDGINDcGDQSDELcck.[A]     | N-Term(iTRAQ4plex); C2(Carbam  | 1 | 1 |
| [K].acDGINDcGDQSDELcck.[A]     | N-Term(iTRAQ4plex); C2(Carbam  | 1 | 1 |
| [K].acDGINDcGDQSDELcck.[A]     | N-Term(iTRAQ4plex); C2(Carbam  | 1 | 1 |
| [K].acDGINDcGDQSDELcck.[A]     | N-Term(iTRAQ4plex); C2(Carbam  | 1 | 1 |
| [R].yQIWTTVVVDWIHPDLk.[R]      | N-Term(iTRAQ4plex); K16(iTRAQ  | 1 | 1 |
| [K].acDGINDcGDQSDELcck.[A]     | N-Term(iTRAQ4plex); C2(Carbam  | 1 | 1 |
| [K].AcDGINDcGDQSDELcck.[A]     | C2(Carbamidomethyl); C8(Carba  | 1 | 1 |
| [K].acDGINDcGDQSDELcck.[A]     | N-Term(iTRAQ4plex); C2(Carbam  | 1 | 1 |
| [K].acDGINDcGDQSDELcck.[A]     | N-Term(iTRAQ4plex); C2(Carbam  | 1 | 1 |
| [K].acDGINDcGDQSDELcck.[A]     | N-Term(iTRAQ4plex); C2(Carbam  | 1 | 1 |
| [K].acDGINDcGDQSDELcck.[A]     | N-Term(iTRAQ4plex); C2(Carbam  | 1 | 1 |
| [K].acDGINDcGDQSDELcck.[A]     | N-Term(iTRAQ4plex); C2(Carbam  | 1 | 1 |
| [K].sLEcLHPGtK.[F]             | N-Term(iTRAQ4plex); C4(Carbam  | 1 | 1 |
| [R].aQLGDLPWQVAIk.[D]          | N-Term(iTRAQ4plex); K13(iTRAQ  | 1 | 1 |
| [K].raQLGDLPWQVAIk.[D]         | N-Term(iTRAQ4plex); K14(iTRAQ  | 1 | 1 |
| [K].sLEcLHPGtK.[F]             | N-Term(iTRAQ4plex); C4(Carbam  | 1 | 1 |
| [R].vFSLQWGEVk.[L]             | N-Term(iTRAQ4plex); K10(iTRAQ  | 1 | 1 |
| [R].cIEGTcVck.[L]              | N-Term(iTRAQ4plex); C1(Carbam  | 1 | 1 |
| [R].vFSLQWGEVk.[L]             | N-Term(iTRAQ4plex); K10(iTRAQ  | 1 | 1 |
| [R].iVIEYVDR.[I]               | N-Term(iTRAQ4plex)             | 1 | 1 |

|                               |                                |   |   |
|-------------------------------|--------------------------------|---|---|
| [K].acDGINDcGDQSDELcck.[A]    | N-Term(iTRAQ4plex); C2(Carbam  | 1 | 1 |
| [R].aQLGDLPWQVAIk.[D]         | N-Term(iTRAQ4plex); K13(iTRAQ  | 1 | 1 |
| [K].kYTHLScDk.[V]             | N-Term(iTRAQ4plex); K1(iTRAQ4  | 1 | 1 |
| [K].AcDGINDcGDQSDELcck.[A]    | C2(Carbamidomethyl); C8(Carba  | 1 | 1 |
| [K].vFcQPWQR.[C]              | N-Term(iTRAQ4plex); C3(Carbam  | 1 | 1 |
| [R].AQLGDLPWQVAIk.[D]         | K13(iTRAQ4plex)                | 1 | 1 |
| [R].tMGYQDFADVvcYTQk.[A]      | N-Term(iTRAQ4plex); C12(Carbar | 1 | 1 |
| [R].iVIEYVDR.[I]              | N-Term(iTRAQ4plex)             | 1 | 1 |
| [K].kLELHLPk.[F]              | N-Term(iTRAQ4plex); K1(iTRAQ4  | 1 | 1 |
| [R].eIEEVLTPPELMR.[W]         | N-Term(iTRAQ4plex)             | 1 | 1 |
| [K].aTLDVDEAGTEAAAATSFAIk.[F] | N-Term(iTRAQ4plex); K21(iTRAQ  | 1 | 1 |
| [R].eIEEVLTPPELMR.[W]         | N-Term(iTRAQ4plex)             | 1 | 1 |
| [R].vGSALFLSHNLk.[F]          | N-Term(iTRAQ4plex); K12(iTRAQ  | 1 | 1 |
| [R].vGSALFLSHNLk.[F]          | N-Term(iTRAQ4plex); K12(iTRAQ  | 1 | 1 |
| [R].vGSALFLSHNLk.[F]          | N-Term(iTRAQ4plex); K12(iTRAQ  | 1 | 1 |
| [K].iAPANADFAFR.[F]           | N-Term(iTRAQ4plex)             | 1 | 1 |
| [K].wADLSGITk.[Q]             | N-Term(iTRAQ4plex); K9(iTRAQ4  | 1 | 1 |
| [K].iVDLVSELk.[K]             | N-Term(iTRAQ4plex); K9(iTRAQ4  | 1 | 1 |
| [R].IGFTDLFSk.[W]             | N-Term(iTRAQ4plex); K9(iTRAQ4  | 1 | 1 |
| [K].LFHTNFYDVTGTIQLINDHVk.[K] | K21(iTRAQ4plex)                | 1 | 1 |
| [K].IFHTNFYDVTGTIQLINDHVk.[K] | N-Term(iTRAQ4plex); K21(iTRAQ  | 1 | 1 |
| [K].gDATVFFILPNQgk.[M]        | N-Term(iTRAQ4plex); K14(iTRAQ  | 1 | 1 |
| [K].fSISGSYVLDQILPR.[L]       | N-Term(iTRAQ4plex)             | 1 | 1 |
| [R].gFQHLLHTLNLPGHGLETR.[V]   | N-Term(iTRAQ4plex)             | 1 | 1 |
| [R].gFQHLLHTLNLPGHGLETR.[V]   | N-Term(iTRAQ4plex)             | 1 | 1 |
| [K].aLWEkPFISSR.[T]           | N-Term(iTRAQ4plex); K5(iTRAQ4  | 1 | 1 |
| [R].vGSALFLSHNLk.[F]          | N-Term(iTRAQ4plex); K12(iTRAQ  | 1 | 1 |
| [R].gFQHLLHTLNLPGHGLETR.[V]   | N-Term(iTRAQ4plex)             | 1 | 1 |
| [R].eIEEVLTPPELMR.[W]         | N-Term(iTRAQ4plex)             | 1 | 1 |
| [R].fYYLIASETPGk.[N]          | N-Term(iTRAQ4plex); K12(iTRAQ  | 1 | 1 |
| [K].aTLDVDEAGTEAAAATSFAIk.[F] | N-Term(iTRAQ4plex); K21(iTRAQ  | 1 | 1 |
| [K].aLWEkPFISSR.[T]           | N-Term(iTRAQ4plex); K5(iTRAQ4  | 1 | 1 |
| [K].wADLSGITk.[Q]             | N-Term(iTRAQ4plex); K9(iTRAQ4  | 1 | 1 |
| [R].vPMMLQDQEHHWYLHDR.[Y]     | N-Term(iTRAQ4plex)             | 1 | 1 |
| [K].IELHLPk.[F]               | N-Term(iTRAQ4plex); K7(iTRAQ4  | 1 | 1 |
| [K].FFSAQTNR.[H]              | N-Term(iTRAQ4plex)             | 1 | 1 |
| [R].eIEEVLTPPELMR.[W]         | N-Term(iTRAQ4plex)             | 1 | 1 |
| [K].iAPANADFAFR.[F]           | N-Term(iTRAQ4plex)             | 1 | 1 |
| [R].fYYLIASETPGk.[N]          | K12(iTRAQ4plex)                | 1 | 1 |
| [K].FFSAQTNR.[H]              |                                | 1 | 1 |
| [K].IELHLPk.[F]               | N-Term(iTRAQ4plex); K7(iTRAQ4  | 1 | 1 |
| [K].wADLSGITk.[Q]             | N-Term(iTRAQ4plex); K9(iTRAQ4  | 1 | 1 |
| [K].IELHLPk.[F]               | N-Term(iTRAQ4plex); K7(iTRAQ4  | 1 | 1 |
| [K].FFSAQTNR.[H]              |                                | 1 | 1 |
| [R].kVESELikPINPR.[L]         | N-Term(iTRAQ4plex); K1(iTRAQ4  | 1 | 1 |
| [R].kVESELikPINPR.[L]         | N-Term(iTRAQ4plex); K1(iTRAQ4  | 1 | 1 |
| [R].kVESELikPINPR.[L]         | N-Term(iTRAQ4plex); K1(iTRAQ4  | 1 | 1 |
| [R].kVESELikPINPR.[L]         | N-Term(iTRAQ4plex); K1(iTRAQ4  | 1 | 1 |
| [K].aSFTcTckPGWQGEk.[C]       | N-Term(iTRAQ4plex); C5(Carbam  | 1 | 1 |
| [K].aSFTcTckPGWQGEk.[C]       | N-Term(iTRAQ4plex); C5(Carbam  | 1 | 1 |
| [R].sFQTGLFTAAR.[Q]           | N-Term(iTRAQ4plex)             | 1 | 1 |
| [R].iQALSLcSDQQSHLEFR.[V]     | N-Term(iTRAQ4plex); C7(Carbam  | 1 | 1 |

|                                   |                                |   |   |
|-----------------------------------|--------------------------------|---|---|
| [R].iQALSLcSDQQSHLEFR.[V]         | N-Term(iTRAQ4plex); C7(Carbam  | 1 | 1 |
| [K].scEVVSVcLPLNLDTk.[Y]          | N-Term(iTRAQ4plex); C2(Carbam  | 1 | 1 |
| [K].nIPGDFEcEcPEGYR.[Y]           | N-Term(iTRAQ4plex); C8(Carbam  | 1 | 1 |
| [K].nIPGDFEcEcPEGYR.[Y]           | N-Term(iTRAQ4plex); C8(Carbam  | 1 | 1 |
| [K].iETISHEDLQR.[Q]               | N-Term(iTRAQ4plex)             | 1 | 1 |
| [K].hcLVTVEk.[G]                  | N-Term(iTRAQ4plex); C2(Carbam  | 1 | 1 |
| [R].kVESELikPINPR.[L]             | N-Term(iTRAQ4plex); K1(iTRAQ4  | 1 | 1 |
| [K].dVDEcSLkPSIcGTAVck.[N]        | N-Term(iTRAQ4plex); C5(Carbam  | 1 | 1 |
| [R].NNLELSTPLk.[I]                | K10(iTRAQ4plex)                | 1 | 1 |
| [K].nIPGDFEcEcPEGYR.[Y]           | N-Term(iTRAQ4plex); C8(Carbam  | 1 | 1 |
| [R].aHScPSVWk.[K]                 | N-Term(iTRAQ4plex); C4(Carbam  | 1 | 1 |
| [K].aSFTcTckPGWQGEk.[C]           | N-Term(iTRAQ4plex); C5(Carbam  | 1 | 1 |
| [R].fSAEFDFR.[T]                  | N-Term(iTRAQ4plex)             | 1 | 1 |
| [R].kVESELikPINPR.[L]             | K1(iTRAQ4plex); K8(iTRAQ4plex) | 1 | 1 |
| [R].kVESELikPINPR.[L]             | N-Term(iTRAQ4plex); K8(iTRAQ4  | 1 | 1 |
| [K].vYFAGFPR.[K]                  | N-Term(iTRAQ4plex)             | 1 | 1 |
| [R].qSTNAYPDLR.[S]                | N-Term(iTRAQ4plex)             | 1 | 1 |
| [R].qLAVLDk.[A]                   | N-Term(iTRAQ4plex); K7(iTRAQ4  | 1 | 1 |
| [K].IETISHEDLQR.[Q]               |                                | 1 | 1 |
| [K].sQDILLSVENTVIYR.[I]           | N-Term(iTRAQ4plex)             | 1 | 1 |
| [R].scVNAIPDQcSPLPcNEDGYMSck.[D]  | N-Term(iTRAQ4plex); C2(Carbam  | 1 | 1 |
| [R].qSTNAYPDLR.[S]                | N-Term(iTRAQ4plex)             | 1 | 1 |
| [R].nNLELSTPLk.[I]                | N-Term(iTRAQ4plex); K10(iTRAQ  | 1 | 1 |
| [K].hcLVTVEk.[G]                  | N-Term(iTRAQ4plex); C2(Carbam  | 1 | 1 |
| [K].nIPGDFEcEcPEGYR.[Y]           | N-Term(iTRAQ4plex); C8(Carbam  | 1 | 1 |
| [K].sQDILLSVENTVIYR.[I]           | N-Term(iTRAQ4plex)             | 1 | 1 |
| [K].sQDILLSVENTVIYR.[I]           | N-Term(iTRAQ4plex)             | 1 | 1 |
| [R].kVESELikPINPR.[L]             | N-Term(iTRAQ4plex); K1(iTRAQ4  | 1 | 1 |
| [R].aHScPSVWk.[K]                 | N-Term(iTRAQ4plex); C4(Carbam  | 1 | 1 |
| [R].dYIFGNYIER.[L]                | N-Term(iTRAQ4plex)             | 1 | 1 |
| [R].dYIFGNYIER.[L]                | N-Term(iTRAQ4plex)             | 1 | 1 |
| [R].aLDLSLk.[Y]                   | N-Term(iTRAQ4plex); K7(iTRAQ4  | 1 | 1 |
| [K].gMTNINDGLLR.[G]               | N-Term(iTRAQ4plex)             | 1 | 1 |
| [K].gMTNINDGLLR.[G]               | N-Term(iTRAQ4plex)             | 1 | 1 |
| [K].gHVSFkPSLDQQR.[S]             | N-Term(iTRAQ4plex); K6(iTRAQ4  | 1 | 1 |
| [K].kGHVSFkPSLDQQR.[S]            | N-Term(iTRAQ4plex); K1(iTRAQ4  | 1 | 1 |
| [K].kGHVSFkPSLDQQR.[S]            | N-Term(iTRAQ4plex); K1(iTRAQ4  | 1 | 1 |
| [K].kGHVSFkPSLDQQR.[S]            | N-Term(iTRAQ4plex); K1(iTRAQ4  | 1 | 1 |
| [R].sTSIVIMLTDGDANVGESRPEk.[I]    | N-Term(iTRAQ4plex); K22(iTRAQ  | 1 | 1 |
| [R].sTSIVIMLTDGDANVGESRPEk.[I]    | N-Term(iTRAQ4plex); K22(iTRAQ  | 1 | 1 |
| [R].sTSIVIMLTDGDANVGESRPEk.[I]    | N-Term(iTRAQ4plex); K22(iTRAQ  | 1 | 1 |
| [K].eHLVQATPENLQEAR.[T]           | N-Term(iTRAQ4plex)             | 1 | 1 |
| [K].eHLVQATPENLQEAR.[T]           | N-Term(iTRAQ4plex)             | 1 | 1 |
| [K].fPLYNLGFGNLLNYNFLENMALENHGFAR | N-Term(iTRAQ4plex)             | 1 | 1 |
| [K].kGHVSFkPSLDQQR.[S]            | N-Term(iTRAQ4plex); K1(iTRAQ4  | 1 | 1 |
| [K].GMTNINDGLLR.[G]               |                                | 1 | 1 |
| [K].EHLVQATPENLQEAR.[T]           |                                | 1 | 1 |
| [R].dFLGFYVVDShR.[M]              | N-Term(iTRAQ4plex)             | 1 | 1 |
| [R].IVDEDmNSfk.[A]                | N-Term(iTRAQ4plex); M6(Oxidati | 1 | 1 |
| [K].nHQLIVTR.[G]                  | N-Term(iTRAQ4plex)             | 1 | 1 |
| [K].vSDIRPGSDPTkPDATLVVk.[N]      | N-Term(iTRAQ4plex); K12(iTRAQ  | 1 | 1 |
| [R].gISMLNk.[A]                   | N-Term(iTRAQ4plex); K7(iTRAQ4  | 1 | 1 |

|                              |                                              |   |   |
|------------------------------|----------------------------------------------|---|---|
| [K].kGHVSfKPSLDQQR.[S]       | K1(iTRAQ4plex); K7(iTRAQ4plex)               | 1 | 1 |
| [K].kGHVSfKPSLDQQR.[S]       | N-Term(iTRAQ4plex); K7(iTRAQ4plex)           | 1 | 1 |
| [R].aLDLSLk.[Y]              | N-Term(iTRAQ4plex); K7(iTRAQ4plex)           | 1 | 1 |
| [R].fAHNVVTMR.[A]            | N-Term(iTRAQ4plex)                           | 1 | 1 |
| [R].fAHNVVTmR.[A]            | N-Term(iTRAQ4plex); M8(Oxidation)            | 1 | 1 |
| [R].fAHNVVTMR.[A]            | N-Term(iTRAQ4plex)                           | 1 | 1 |
| [K].dASIGTk.[V]              | N-Term(iTRAQ4plex); K7(iTRAQ4plex)           | 1 | 1 |
| [R].fAHNVVTMR.[A]            | N-Term(iTRAQ4plex)                           | 1 | 1 |
| [R].fAHNVVTMR.[A]            | N-Term(iTRAQ4plex)                           | 1 | 1 |
| [K].nHQLIVTR.[G]             | N-Term(iTRAQ4plex)                           | 1 | 1 |
| [R].ALDLSLk.[Y]              | K7(iTRAQ4plex)                               | 1 | 1 |
| [R].dYIFGNYIER.[L]           | N-Term(iTRAQ4plex)                           | 1 | 1 |
| [R].kDASIGTk.[V]             | N-Term(iTRAQ4plex); K1(iTRAQ4plex)           | 1 | 1 |
| [R].gISMLNk.[A]              | N-Term(iTRAQ4plex); K7(iTRAQ4plex)           | 1 | 1 |
| [K].yHFVTPLTSMVVTkPEDNER.[A] | N-Term(iTRAQ4plex); K14(iTRAQ4plex)          | 1 | 1 |
| [K].yHFVTPLTSMVVTkPEDNER.[A] | N-Term(iTRAQ4plex); K14(iTRAQ4plex)          | 1 | 1 |
| [K].nYNLVESLk.[L]            | N-Term(iTRAQ4plex); K9(iTRAQ4plex)           | 1 | 1 |
| [K].nYNLVESLk.[L]            | N-Term(iTRAQ4plex); K9(iTRAQ4plex)           | 1 | 1 |
| [K].fPVEmTHNHNFR.[L]         | N-Term(iTRAQ4plex); M5(Oxidation)            | 1 | 1 |
| [K].fPVEMTHNHNFR.[L]         | N-Term(iTRAQ4plex)                           | 1 | 1 |
| [K].gETHEQVHSILHFk.[D]       | N-Term(iTRAQ4plex); K14(iTRAQ4plex)          | 1 | 1 |
| [K].gETHEQVHSILHFk.[D]       | N-Term(iTRAQ4plex); K14(iTRAQ4plex)          | 1 | 1 |
| [K].gETHEQVHSILHFk.[D]       | N-Term(iTRAQ4plex); K14(iTRAQ4plex)          | 1 | 1 |
| [K].gETHEQVHSILHFk.[D]       | N-Term(iTRAQ4plex); K14(iTRAQ4plex)          | 1 | 1 |
| [K].gETHEQVHSILHFk.[D]       | N-Term(iTRAQ4plex); K14(iTRAQ4plex)          | 1 | 1 |
| [K].gETHEQVHSILHFk.[D]       | N-Term(iTRAQ4plex); K14(iTRAQ4plex)          | 1 | 1 |
| [K].gETHEQVHSILHFk.[D]       | N-Term(iTRAQ4plex); K14(iTRAQ4plex)          | 1 | 1 |
| [K].gETHEQVHSILHFk.[D]       | N-Term(iTRAQ4plex); K14(iTRAQ4plex)          | 1 | 1 |
| [K].gETHEQVHSILHFk.[D]       | N-Term(iTRAQ4plex); K14(iTRAQ4plex)          | 1 | 1 |
| [K].gETHEQVHSILHFk.[D]       | N-Term(iTRAQ4plex); K14(iTRAQ4plex)          | 1 | 1 |
| [R].tScLLFMGR.[V]            | N-Term(iTRAQ4plex); C3(Carbamidomethylation) | 1 | 1 |
| [R].svNDLYIQk.[Q]            | N-Term(iTRAQ4plex); K9(iTRAQ4plex)           | 1 | 1 |
| [R].eYYFAEAQIADFSDPAFISk.[T] | N-Term(iTRAQ4plex); K20(iTRAQ4plex)          | 1 | 1 |
| [K].fPVEMTHNHNFR.[L]         | N-Term(iTRAQ4plex)                           | 1 | 1 |
| [K].fPVEMTHNHNFR.[L]         | N-Term(iTRAQ4plex)                           | 1 | 1 |
| [K].fPVEMTHNHNFR.[L]         | N-Term(iTRAQ4plex)                           | 1 | 1 |
| [K].gETHEQVHSILHFk.[D]       | N-Term(iTRAQ4plex); K14(iTRAQ4plex)          | 1 | 1 |
| [K].gGETAQSadPQWEQLNNk.[N]   | N-Term(iTRAQ4plex); K18(iTRAQ4plex)          | 1 | 1 |
| [K].gPLDQLEk.[G]             | N-Term(iTRAQ4plex); K8(iTRAQ4plex)           | 1 | 1 |
| [R].ftVDRPFLFLIYEHR.[T]      | N-Term(iTRAQ4plex)                           | 1 | 1 |
| [K].qFPILLDFk.[T]            | N-Term(iTRAQ4plex); K9(iTRAQ4plex)           | 1 | 1 |
| [K].TLEAQLTPR.[V]            |                                              | 1 | 1 |
| [R].svNDLYIQk.[Q]            | N-Term(iTRAQ4plex); K9(iTRAQ4plex)           | 1 | 1 |
| [K].yEITTIHNLFR.[K]          | N-Term(iTRAQ4plex)                           | 1 | 1 |
| [K].tLEAQLTPR.[V]            | N-Term(iTRAQ4plex)                           | 1 | 1 |
| [K].tLEAQLTPR.[V]            | N-Term(iTRAQ4plex)                           | 1 | 1 |
| [K].NYNLVESLk.[L]            | K9(iTRAQ4plex)                               | 1 | 1 |
| [K].YEITTIHNLFR.[K]          |                                              | 1 | 1 |
| [K].yEITTIHNLFR.[K]          | N-Term(iTRAQ4plex)                           | 1 | 1 |
| [K].GPLDQLEk.[G]             | K8(iTRAQ4plex)                               | 1 | 1 |
| [R].ftVDRPFLFLIYEHR.[T]      | N-Term(iTRAQ4plex)                           | 1 | 1 |
| [R].rNFGYTLR.[S]             | N-Term(iTRAQ4plex)                           | 1 | 1 |

|                              |                                |   |   |
|------------------------------|--------------------------------|---|---|
| [R].iAIDLFk.[H]              | N-Term(iTRAQ4plex); K7(iTRAQ4  | 1 | 1 |
| [K].qFPILLDFk.[T]            | N-Term(iTRAQ4plex); K9(iTRAQ4  | 1 | 1 |
| [K].nYNLVESLk.[L]            | N-Term(iTRAQ4plex); K9(iTRAQ4  | 1 | 1 |
| [K].fPVEMTHNHNFR.[L]         | N-Term(iTRAQ4plex)             | 1 | 1 |
| [K].TLEAQLTPR.[V]            |                                | 1 | 1 |
| [K].fPVEmTHNHNFR.[L]         | N-Term(iTRAQ4plex); M5(Oxidati | 1 | 1 |
| [K].GGETAQSADPQWEQLNNk.[N]   | K18(iTRAQ4plex)                | 1 | 1 |
| [R].TScLLFMGR.[V]            | C3(Carbamidomethyl)            | 1 | 1 |
| [R].iAIDLFk.[H]              | N-Term(iTRAQ4plex); K7(iTRAQ4  | 1 | 1 |
| [K].tLEAQLTPR.[V]            | N-Term(iTRAQ4plex)             | 1 | 1 |
| [K].fPVEMTHNHNFR.[L]         | N-Term(iTRAQ4plex)             | 1 | 1 |
| [K].gPLDQLEk.[G]             | N-Term(iTRAQ4plex); K8(iTRAQ4  | 1 | 1 |
| [R].EYYFAEAQIADFSDPAFISK.[T] | K20(iTRAQ4plex)                | 1 | 1 |
| [R].iAIDLFk.[H]              | N-Term(iTRAQ4plex); K7(iTRAQ4  | 1 | 1 |
| [K].nYNLVESLk.[L]            | N-Term(iTRAQ4plex); K9(iTRAQ4  | 1 | 1 |
| [K].qFPILLDFk.[T]            | N-Term(iTRAQ4plex); K9(iTRAQ4  | 1 | 1 |
| [K].QFPILLDFk.[T]            | K9(iTRAQ4plex)                 | 1 | 1 |
| [K].gETHEQVHSILHFk.[D]       | N-Term(iTRAQ4plex); K14(iTRAQ  | 1 | 1 |
| [R].IAIDLFk.[H]              | K7(iTRAQ4plex)                 | 1 | 1 |
| [K].tLEAQLTPR.[V]            | N-Term(iTRAQ4plex)             | 1 | 1 |
| [K].nGNMAGISDQR.[I]          | N-Term(iTRAQ4plex)             | 1 | 1 |
| [R].svNDLYIQk.[Q]            | N-Term(iTRAQ4plex); K9(iTRAQ4  | 1 | 1 |
| [K].vSMMQTKk.[G]             | N-Term(iTRAQ4plex); K7(iTRAQ4  | 1 | 1 |
| [R].INILNAk.[F]              | N-Term(iTRAQ4plex); K7(iTRAQ4  | 1 | 1 |
| [K].fAFNLYR.[V]              | N-Term(iTRAQ4plex)             | 1 | 1 |
| [R].INILNAk.[F]              | N-Term(iTRAQ4plex); K7(iTRAQ4  | 1 | 1 |
| [K].TLEAQLTPR.[V]            |                                | 1 | 1 |
| [K].gPLDQLEk.[G]             | N-Term(iTRAQ4plex); K8(iTRAQ4  | 1 | 1 |
| [K].gPLDQLEk.[G]             | N-Term(iTRAQ4plex); K8(iTRAQ4  | 1 | 1 |
| [K].fPVEMTHNHNFR.[L]         | N-Term(iTRAQ4plex)             | 1 | 1 |
| [K].fPVEmTHNHNFR.[L]         | N-Term(iTRAQ4plex); M5(Oxidati | 1 | 1 |
| [K].fAFNLYR.[V]              | N-Term(iTRAQ4plex)             | 1 | 1 |
| [K].fPVEMTHNHNFR.[L]         | N-Term(iTRAQ4plex)             | 1 | 1 |
| [R].ITGSSGFVTDGPGNYk.[Y]     | N-Term(iTRAQ4plex); K16(iTRAQ  | 1 | 1 |
| [R].ITGSSGFVTDGPGNYk.[Y]     | N-Term(iTRAQ4plex); K16(iTRAQ  | 1 | 1 |
| [R].wSVLPRPDLHHDVNR.[F]      | N-Term(iTRAQ4plex)             | 1 | 1 |
| [R].wSVLPRPDLHHDVNR.[F]      | N-Term(iTRAQ4plex)             | 1 | 1 |
| [R].wSVLPRPDLHHDVNR.[F]      | N-Term(iTRAQ4plex)             | 1 | 1 |
| [R].nHNALLASLTQk.[K]         | N-Term(iTRAQ4plex); K13(iTRAQ  | 1 | 1 |
| [R].nHNALLASLTQk.[K]         | N-Term(iTRAQ4plex); K13(iTRAQ  | 1 | 1 |
| [K].cFSSDFMAYDIACDR.[W]      | N-Term(iTRAQ4plex); C1(Carbam  | 1 | 1 |
| [R].iMQSSQSMSk.[L]           | N-Term(iTRAQ4plex); K10(iTRAQ  | 1 | 1 |
| [R].aLYVHGGYk.[A]            | N-Term(iTRAQ4plex); K9(iTRAQ4  | 1 | 1 |
| [R].nHNALLASLTQk.[K]         | N-Term(iTRAQ4plex); K13(iTRAQ  | 1 | 1 |
| [R].IMQSSQSMSk.[L]           | K10(iTRAQ4plex)                | 1 | 1 |
| [R].svNNVVVR.[Y]             | N-Term(iTRAQ4plex)             | 1 | 1 |
| [R].SEAAcLAAGPGIR.[C]        | C5(Carbamidomethyl)            | 1 | 1 |
| [K].dNPMYYcNk.[K]            | N-Term(iTRAQ4plex); C7(Carbam  | 1 | 1 |
| [K].dNPMYYcNk.[K]            | N-Term(iTRAQ4plex); C7(Carbam  | 1 | 1 |
| [K].gEAcdIPHcTDNcGFPHR.[G]   | N-Term(iTRAQ4plex); C4(Carbam  | 1 | 1 |
| [R].sEAAcLAAGPGIR.[C]        | N-Term(iTRAQ4plex); C5(Carbam  | 1 | 1 |
| [R].sEAAcLAAGPGIR.[C]        | N-Term(iTRAQ4plex); C5(Carbam  | 1 | 1 |



|                             |                                |   |   |
|-----------------------------|--------------------------------|---|---|
| [K].gDEcQLcEVENR.[Y]        | N-Term(iTRAQ4plex); C4(Carbam  | 1 | 1 |
| [K].gDEcQLcEVENR.[Y]        | N-Term(iTRAQ4plex); C4(Carbam  | 1 | 1 |
| [K].gDEcQLcEVENR.[Y]        | N-Term(iTRAQ4plex); C4(Carbam  | 1 | 1 |
| [K].gDEcQLcEVENR.[Y]        | N-Term(iTRAQ4plex); C4(Carbam  | 1 | 1 |
| [K].gDEcQLcEVENR.[Y]        | N-Term(iTRAQ4plex); C4(Carbam  | 1 | 1 |
| [K].gDEcQLcEVENR.[Y]        | N-Term(iTRAQ4plex); C4(Carbam  | 1 | 1 |
| [K].gDEcQLcEVENR.[Y]        | N-Term(iTRAQ4plex); C4(Carbam  | 1 | 1 |
| [K].kVEFVLk.[Q]             | N-Term(iTRAQ4plex); K1(iTRAQ4  | 1 | 1 |
| [R].ITGSSGFVTDGPGNYk.[Y]    | N-Term(iTRAQ4plex); K16(iTRAQ  | 1 | 1 |
| [K].cFSSDFMAYDIACDR.[W]     | N-Term(iTRAQ4plex); C1(Carbam  | 1 | 1 |
| [K].dSFSNEk.[F]             | N-Term(iTRAQ4plex); K7(iTRAQ4  | 1 | 1 |
| [K].gDEcQLcEVENR.[Y]        | N-Term(iTRAQ4plex); C4(Carbam  | 1 | 1 |
| [R].yDVDTQMWTILk.[D]        | N-Term(iTRAQ4plex); K12(iTRAQ  | 1 | 1 |
| [K].dNPMYYcNk.[K]           | N-Term(iTRAQ4plex); M4(Oxidati | 1 | 1 |
| [R].svNNVVVR.[Y]            | N-Term(iTRAQ4plex)             | 1 | 1 |
| [R].yGHSLALYk.[D]           | N-Term(iTRAQ4plex); K9(iTRAQ4  | 1 | 1 |
| [R].eEYSNLk.[L]             | N-Term(iTRAQ4plex); K7(iTRAQ4  | 1 | 1 |
| [R].imQSSQSMsk.[L]          | N-Term(iTRAQ4plex); M2(Oxidati | 1 | 1 |
| [R].imQSSQSMsk.[L]          | N-Term(iTRAQ4plex); K10(iTRAQ  | 1 | 1 |
| [R].sEAACLAAGPGIR.[C]       | N-Term(iTRAQ4plex); C5(Carbam  | 1 | 1 |
| [R].aLYVHGGYk.[A]           | N-Term(iTRAQ4plex); K9(iTRAQ4  | 1 | 1 |
| [K].cTWLIEGQPNR.[I]         | N-Term(iTRAQ4plex); C1(Carbam  | 1 | 1 |
| [K].ITLTPWVGLR.[K]          | N-Term(iTRAQ4plex)             | 1 | 1 |
| [K].kVEFVLk.[Q]             | N-Term(iTRAQ4plex); K1(iTRAQ4  | 1 | 1 |
| [R].nHNALLASLTQk.[K]        | N-Term(iTRAQ4plex); K13(iTRAQ  | 1 | 1 |
| [K].cTWLIEGQPNR.[I]         | N-Term(iTRAQ4plex); C1(Carbam  | 1 | 1 |
| [R].imQSSQSMsk.[L]          | N-Term(iTRAQ4plex); M8(Oxidati | 1 | 1 |
| [K].gEAcDIPHcTDNcGFPHR.[G]  | N-Term(iTRAQ4plex); C4(Carbam  | 1 | 1 |
| [K].aVLDVFEEGTEASAATAVk.[I] | N-Term(iTRAQ4plex); K19(iTRAQ  | 1 | 1 |
| [R].IYGSEAFATDFQDSAAAK.[K]  | N-Term(iTRAQ4plex); K18(iTRAQ  | 1 | 1 |
| [R].IYGSEAFATDFQDSAAAK.[K]  | N-Term(iTRAQ4plex); K18(iTRAQ  | 1 | 1 |
| [R].IYGSEAFATDFQDSAAAK.[K]  | N-Term(iTRAQ4plex); K18(iTRAQ  | 1 | 1 |
| [K].wEMPFDPQDTHQSR.[F]      | N-Term(iTRAQ4plex)             | 1 | 1 |
| [K].wEMPFDPQDTHQSR.[F]      | N-Term(iTRAQ4plex)             | 1 | 1 |
| [K].wEMPFDPQDTHQSR.[F]      | N-Term(iTRAQ4plex)             | 1 | 1 |
| [K].wEMPFDPQDTHQSR.[F]      | N-Term(iTRAQ4plex)             | 1 | 1 |
| [R].nLAVSQVVHk.[A]          | N-Term(iTRAQ4plex); K10(iTRAQ  | 1 | 1 |
| [K].ADLSGITGAR.[N]          |                                | 1 | 1 |
| [K].mEEVEAMLLPETLk.[R]      | N-Term(iTRAQ4plex); M1(Oxidati | 1 | 1 |
| [K].aVLDVFEEGTEASAATAVk.[I] | N-Term(iTRAQ4plex); K19(iTRAQ  | 1 | 1 |
| [K].mEEVEAmLLPETLk.[R]      | N-Term(iTRAQ4plex); M7(Oxidati | 1 | 1 |
| [K].mEEVEAMLLPETLk.[R]      | N-Term(iTRAQ4plex); M1(Oxidati | 1 | 1 |
| [K].mEEVEAMLLPETLk.[R]      | N-Term(iTRAQ4plex); M1(Oxidati | 1 | 1 |
| [K].aVLDVFEEGTEASAATAVk.[I] | N-Term(iTRAQ4plex); K19(iTRAQ  | 1 | 1 |
| [K].aVLDVFEEGTEASAATAVk.[I] | N-Term(iTRAQ4plex); K19(iTRAQ  | 1 | 1 |
| [K].mEEVEAMLLPETLk.[R]      | N-Term(iTRAQ4plex); M1(Oxidati | 1 | 1 |
| [K].aVLDVFEEGTEASAATAVk.[I] | N-Term(iTRAQ4plex); K19(iTRAQ  | 1 | 1 |
| [K].mEEVEAmLLPETLk.[R]      | N-Term(iTRAQ4plex); M7(Oxidati | 1 | 1 |
| [K].mEEVEAmLLPETLk.[R]      | N-Term(iTRAQ4plex); M7(Oxidati | 1 | 1 |
| [K].mEEVEAmLLPETLk.[R]      | N-Term(iTRAQ4plex); M7(Oxidati | 1 | 1 |
| [K].mEEVEAMLLPETLk.[R]      | N-Term(iTRAQ4plex); K14(iTRAQ  | 1 | 1 |
| [K].mEEVEAMLLPETLk.[R]      | N-Term(iTRAQ4plex); K14(iTRAQ  | 1 | 1 |



|                                    |                               |   |   |
|------------------------------------|-------------------------------|---|---|
| [R].eIGELYLPk.[F]                  | N-Term(iTRAQ4plex); K9(iTRAQ4 | 1 | 1 |
| [R].IYGSEAFATDFQDSAAAK.[K]         | N-Term(iTRAQ4plex); K18(iTRAQ | 1 | 1 |
| [R].IYGSEAFATDFQDSAAAK.[K]         | N-Term(iTRAQ4plex); K18(iTRAQ | 1 | 1 |
| [R].IYGSEAFATDFQDSAAAK.[K]         | N-Term(iTRAQ4plex); K18(iTRAQ | 1 | 1 |
| [R].IYGSEAFATDFQDSAAAK.[K]         | N-Term(iTRAQ4plex); K18(iTRAQ | 1 | 1 |
| [R].IYGSEAFATDFQDSAAAK.[K]         | N-Term(iTRAQ4plex); K18(iTRAQ | 1 | 1 |
| [R].IYGSEAFATDFQDSAAAK.[K]         | N-Term(iTRAQ4plex); K18(iTRAQ | 1 | 1 |
| [R].IYGSEAFATDFQDSAAAK.[K]         | N-Term(iTRAQ4plex); K18(iTRAQ | 1 | 1 |
| [R].IYGSEAFATDFQDSAAAK.[K]         | N-Term(iTRAQ4plex); K18(iTRAQ | 1 | 1 |
| [R].IYGSEAFATDFQDSAAAK.[K]         | N-Term(iTRAQ4plex); K18(iTRAQ | 1 | 1 |
| [R].IYGSEAFATDFQDSAAAK.[K]         | N-Term(iTRAQ4plex); K18(iTRAQ | 1 | 1 |
| [R].IYGSEAFATDFQDSAAAK.[K]         | N-Term(iTRAQ4plex); K18(iTRAQ | 1 | 1 |
| [R].IYGSEAFATDFQDSAAAK.[K]         | N-Term(iTRAQ4plex); K18(iTRAQ | 1 | 1 |
| [R].IYGSEAFATDFQDSAAAK.[K]         | N-Term(iTRAQ4plex); K18(iTRAQ | 1 | 1 |
| [R].IYGSEAFATDFQDSAAAK.[K]         | N-Term(iTRAQ4plex); K18(iTRAQ | 1 | 1 |
| [K].aDLSGITGAR.[N]                 | N-Term(iTRAQ4plex)            | 1 | 1 |
| [R].nLAVSQVHk.[A]                  | N-Term(iTRAQ4plex); K10(iTRAQ | 1 | 1 |
| [K].kLINDYVk.[N]                   | N-Term(iTRAQ4plex); K1(iTRAQ4 | 1 | 1 |
| [R].nLAVSQVHk.[A]                  | N-Term(iTRAQ4plex); K10(iTRAQ | 1 | 1 |
| [K].kLINDYVk.[N]                   | N-Term(iTRAQ4plex); K1(iTRAQ4 | 1 | 1 |
| [R].nLAVSQVHk.[A]                  | N-Term(iTRAQ4plex); K10(iTRAQ | 1 | 1 |
| [R].nLAVSQVHk.[A]                  | N-Term(iTRAQ4plex); K10(iTRAQ | 1 | 1 |
| [K].aDLSGITGAR.[N]                 | N-Term(iTRAQ4plex)            | 1 | 1 |
| [R].nLAVSQVHk.[A]                  | N-Term(iTRAQ4plex); K10(iTRAQ | 1 | 1 |
| [K].aVLDVFEEGTEASAATAVk.[I]        | N-Term(iTRAQ4plex); K19(iTRAQ | 1 | 1 |
| [R].IYGSEAFATDFQDSAAAK.[K]         | N-Term(iTRAQ4plex); K18(iTRAQ | 1 | 1 |
| [K].aVLDVFEEGTEASAATAVk.[I]        | N-Term(iTRAQ4plex); K19(iTRAQ | 1 | 1 |
| [R].IYGSEAFATDFQDSAAAK.[K]         | N-Term(iTRAQ4plex); K18(iTRAQ | 1 | 1 |
| [R].IYGSEAFATDFQDSAAAK.[K]         | N-Term(iTRAQ4plex); K18(iTRAQ | 1 | 1 |
| [R].IYGSEAFATDFQDSAAAK.[K]         | N-Term(iTRAQ4plex); K18(iTRAQ | 1 | 1 |
| [K].mEEVEAMLLPETLk.[R]             | N-Term(iTRAQ4plex); K14(iTRAQ | 1 | 1 |
| [K].mEEVEAMLLPETLk.[R]             | N-Term(iTRAQ4plex); K14(iTRAQ | 1 | 1 |
| [R].nLAVSQVHk.[A]                  | N-Term(iTRAQ4plex); K10(iTRAQ | 1 | 1 |
| [K].wEMPFDPQDTHQSR.[F]             | N-Term(iTRAQ4plex)            | 1 | 1 |
| [R].IYGSEAFATDFQDSAAAK.[K]         | N-Term(iTRAQ4plex); K18(iTRAQ | 1 | 1 |
| [R].IYGSEAFATDFQDSAAAK.[K]         | N-Term(iTRAQ4plex); K18(iTRAQ | 1 | 1 |
| [R].nLAVSQVHkAVLDVFEEGTEASAATAVk.[ | N-Term(iTRAQ4plex); K10(iTRAQ | 1 | 1 |
| [R].dEELScTVVELk.[Y]               | N-Term(iTRAQ4plex); C6(Carbam | 1 | 1 |
| [R].NLAVSQVHkAVLDVFEEGTEASAATAVk.[ | K10(iTRAQ4plex); K29(iTRAQ4pl | 1 | 1 |
| [K].ITLLSALVETR.[T]                |                               | 1 | 1 |
| [R].gTHVDLGLASANVDFAFSLYk.[Q]      | N-Term(iTRAQ4plex); K21(iTRAQ | 1 | 1 |
| [R].dEELScTVVELk.[Y]               | N-Term(iTRAQ4plex); C6(Carbam | 1 | 1 |
| [R].dEELScTVVELk.[Y]               | N-Term(iTRAQ4plex); C6(Carbam | 1 | 1 |
| [R].gTHVDLGLASANVDFAFSLYk.[Q]      | N-Term(iTRAQ4plex); K21(iTRAQ | 1 | 1 |
| [R].DEELScTVVELk.[Y]               | C6(Carbamidomethyl); K12(iTRA | 1 | 1 |
| [K].iTLLSALVETR.[T]                | N-Term(iTRAQ4plex)            | 1 | 1 |
| [K].iTLLSALVETR.[T]                | N-Term(iTRAQ4plex)            | 1 | 1 |
| [K].iTLLSALVETR.[T]                | N-Term(iTRAQ4plex)            | 1 | 1 |
| [K].iTLLSALVETR.[T]                | N-Term(iTRAQ4plex)            | 1 | 1 |
| [K].iTLLSALVETR.[T]                | N-Term(iTRAQ4plex)            | 1 | 1 |
| [K].iTLLSALVETR.[T]                | N-Term(iTRAQ4plex)            | 1 | 1 |
| [R].dYNLNDILLQLGIEEAFTSk.[A]       | N-Term(iTRAQ4plex); K20(iTRAQ | 1 | 1 |

|                                         |                                      |   |   |
|-----------------------------------------|--------------------------------------|---|---|
| [R].dYNLNDILLQLGIEEFTSk.[A]             | N-Term(iTRAQ4plex); K20(iTRAQ4plex)  | 1 | 1 |
| [K].dLDSQTMMLVNVYIFFk.[A]               | N-Term(iTRAQ4plex); K17(iTRAQ4plex)  | 1 | 1 |
| [K].dLDSQTMMLVNVYIFFk.[A]               | N-Term(iTRAQ4plex); K17(iTRAQ4plex)  | 1 | 1 |
| [R].fNRPFLMIIVPTDTQNIFFMSk.[V]          | N-Term(iTRAQ4plex); K22(iTRAQ4plex)  | 1 | 1 |
| [R].fNRPFLMIIVPTDTQNIFFMSk.[V]          | N-Term(iTRAQ4plex); K22(iTRAQ4plex)  | 1 | 1 |
| [K].mEEVEAmLLPETLk.[R]                  | N-Term(iTRAQ4plex); M7(Oxidation)    | 1 | 1 |
| [R].nLAVSQVVHk.[A]                      | N-Term(iTRAQ4plex); K10(iTRAQ4plex)  | 1 | 1 |
| [K].eQLSLLDR.[F]                        | N-Term(iTRAQ4plex)                   | 1 | 1 |
| [R].LYGSEAFATDFQDSAAAK.[K]              | K18(iTRAQ4plex)                      | 1 | 1 |
| [K].IINDYVv.[N]                         | N-Term(iTRAQ4plex); K7(iTRAQ4plex)   | 1 | 1 |
| [K].AVLDVFEEGTEASAATAVv.[I]             | K19(iTRAQ4plex)                      | 1 | 1 |
| [R].LYGSEAFATDFQDSAAAK.[K]              | N-Term(iTRAQ4plex); K18(iTRAQ4plex)  | 1 | 1 |
| [K].aVLDVFEEGTEASAATAVv.[I]             | N-Term(iTRAQ4plex); K19(iTRAQ4plex)  | 1 | 1 |
| [K].aVLDVFEEGTEASAATAVvKITLLSALVETR.[T] | N-Term(iTRAQ4plex); K19(iTRAQ4plex)  | 1 | 1 |
| [R].NLAVSQVVHk.[A]                      | K10(iTRAQ4plex)                      | 1 | 1 |
| [R].DEELScTVVELk.[Y]                    | C6(Carbamidomethyl); K12(iTRAQ4plex) | 1 | 1 |
| [R].eIGELYLPk.[F]                       | N-Term(iTRAQ4plex); K9(iTRAQ4plex)   | 1 | 1 |
| [K].aDLSGITGAR.[N]                      | N-Term(iTRAQ4plex)                   | 1 | 1 |
| [R].LYGSEAFATDFQDSAAAK.[K]              | N-Term(iTRAQ4plex); K18(iTRAQ4plex)  | 1 | 1 |
| [K].aVLDVFEEGTEASAATAVv.[I]             | N-Term(iTRAQ4plex); K19(iTRAQ4plex)  | 1 | 1 |
| [R].LYGSEAFATDFQDSAAAK.[K]              | N-Term(iTRAQ4plex); K18(iTRAQ4plex)  | 1 | 1 |
| [K].wEMPFDPQDTHQSR.[F]                  | N-Term(iTRAQ4plex)                   | 1 | 1 |
| [K].aVLDVFEEGTEASAATAVv.[I]             | N-Term(iTRAQ4plex); K19(iTRAQ4plex)  | 1 | 1 |
| [R].LYGSEAFATDFQDSAAAK.[K]              | N-Term(iTRAQ4plex); K18(iTRAQ4plex)  | 1 | 1 |
| [K].eQLSLLDR.[F]                        | N-Term(iTRAQ4plex)                   | 1 | 1 |
| [K].aDLSGITGAR.[N]                      | N-Term(iTRAQ4plex)                   | 1 | 1 |
| [R].LYGSEAFATDFQDSAAAK.[K]              | N-Term(iTRAQ4plex); K18(iTRAQ4plex)  | 1 | 1 |
| [K].aVLDVFEEGTEASAATAVv.[I]             | N-Term(iTRAQ4plex); K19(iTRAQ4plex)  | 1 | 1 |
| [K].rLYGSEAFATDFQDSAAAK.[K]             | N-Term(iTRAQ4plex); K19(iTRAQ4plex)  | 1 | 1 |
| [R].eIGELYLPk.[F]                       | N-Term(iTRAQ4plex); K9(iTRAQ4plex)   | 1 | 1 |
| [R].nLAVSQVVHk.[A]                      | N-Term(iTRAQ4plex); K10(iTRAQ4plex)  | 1 | 1 |
| [R].LYGSEAFATDFQDSAAAK.[K]              | N-Term(iTRAQ4plex); K18(iTRAQ4plex)  | 1 | 1 |
| [R].EIGELYLPk.[F]                       | K9(iTRAQ4plex)                       | 1 | 1 |
| [R].LYGSEAFATDFQDSAAAK.[K]              | N-Term(iTRAQ4plex); K18(iTRAQ4plex)  | 1 | 1 |
| [R].nLAVSQVVHk.[A]                      | N-Term(iTRAQ4plex); K10(iTRAQ4plex)  | 1 | 1 |
| [R].LYGSEAFATDFQDSAAAK.[K]              | N-Term(iTRAQ4plex); K18(iTRAQ4plex)  | 1 | 1 |
| [R].eIGELYLPk.[F]                       | N-Term(iTRAQ4plex); K9(iTRAQ4plex)   | 1 | 1 |
| [K].ADLSGITGAR.[N]                      | N-Term(iTRAQ4plex)                   | 1 | 1 |
| [K].aVLDVFEEGTEASAATAVv.[I]             | N-Term(iTRAQ4plex); K19(iTRAQ4plex)  | 1 | 1 |
| [R].NLAVSQVVHk.[A]                      | N-Term(iTRAQ4plex)                   | 1 | 1 |
| [K].MEEVEAMLLPETLk.[R]                  | K14(iTRAQ4plex)                      | 1 | 1 |
| [R].LYGSEAFATDFQDSAAAK.[K]              | N-Term(iTRAQ4plex); K18(iTRAQ4plex)  | 1 | 1 |
| [R].LYGSEAFATDFQDSAAAK.[K]              | N-Term(iTRAQ4plex); K18(iTRAQ4plex)  | 1 | 1 |
| [R].LYGSEAFATDFQDSAAAK.[K]              | N-Term(iTRAQ4plex); K18(iTRAQ4plex)  | 1 | 1 |
| [R].LYGSEAFATDFQDSAAAK.[K]              | N-Term(iTRAQ4plex); K18(iTRAQ4plex)  | 1 | 1 |
| [K].mEEVEAMLLPETLk.[R]                  | N-Term(iTRAQ4plex); M1(Oxidation)    | 1 | 1 |
| [R].LYGSEAFATDFQDSAAAK.[K]              | N-Term(iTRAQ4plex); K18(iTRAQ4plex)  | 1 | 1 |
| [K].wEMPFDPQDTHQSR.[F]                  | N-Term(iTRAQ4plex)                   | 1 | 1 |
| [K].IINDYVv.[N]                         | N-Term(iTRAQ4plex); K7(iTRAQ4plex)   | 1 | 1 |
| [K].aVLDVFEEGTEASAATAVv.[I]             | N-Term(iTRAQ4plex); K19(iTRAQ4plex)  | 1 | 1 |
| [R].nLAVSQVVHk.[A]                      | N-Term(iTRAQ4plex); K10(iTRAQ4plex)  | 1 | 1 |
| [R].LYGSEAFATDFQDSAAAK.[K]              | N-Term(iTRAQ4plex); K18(iTRAQ4plex)  | 1 | 1 |

|                                    |                                          |   |   |
|------------------------------------|------------------------------------------|---|---|
| [R].IYGSEAFATDFQDSAAAK.[K]         | N-Term(iTRAQ4plex); K18(iTRAQ4plex)      | 1 | 1 |
| [K].LINDYVv.[N]                    | K7(iTRAQ4plex)                           | 1 | 1 |
| [K].wEmPFDPQDTHQSR.[F]             | N-Term(iTRAQ4plex); M3(Oxidation)        | 1 | 1 |
| [R].eIGELYLPk.[F]                  | N-Term(iTRAQ4plex); K9(iTRAQ4plex)       | 1 | 1 |
| [R].DEELScTVVELk.[Y]               | C6(Carbamidomethyl); K12(iTRAQ4plex)     | 1 | 1 |
| [K].IINDYVv.[N]                    | N-Term(iTRAQ4plex); K7(iTRAQ4plex)       | 1 | 1 |
| [K].IINDYVv.[N]                    | N-Term(iTRAQ4plex); K7(iTRAQ4plex)       | 1 | 1 |
| [R].dEELScTVVELk.[Y]               | N-Term(iTRAQ4plex); C6(Carbamidomethyl)  | 1 | 1 |
| [R].eIGELYLPk.[F]                  | N-Term(iTRAQ4plex); K9(iTRAQ4plex)       | 1 | 1 |
| [K].IINDYVv.[N]                    | N-Term(iTRAQ4plex); K7(iTRAQ4plex)       | 1 | 1 |
| [R].NLAVSQVVHk.[A]                 | K10(iTRAQ4plex)                          | 1 | 1 |
| [R].eIGELYLPK.[F]                  | N-Term(iTRAQ4plex)                       | 1 | 1 |
| [K].wEmPFDPQDTHQSR.[F]             | N-Term(iTRAQ4plex); M3(Oxidation)        | 1 | 1 |
| [K].wEMPFDPQDTHQSR.[F]             | N-Term(iTRAQ4plex)                       | 1 | 1 |
| [K].ITLLSALVETR.[T]                | N-Term(iTRAQ4plex)                       | 1 | 1 |
| [R].eIGELYLPk.[F]                  | N-Term(iTRAQ4plex); K9(iTRAQ4plex)       | 1 | 1 |
| [K].aVLDVFEEGTEASAATAVv.[I]        | N-Term(iTRAQ4plex); K19(iTRAQ4plex)      | 1 | 1 |
| [K].aVLDVFEEGTEASAATAVv.[I]        | N-Term(iTRAQ4plex); K19(iTRAQ4plex)      | 1 | 1 |
| [K].IINDYVv.[N]                    | N-Term(iTRAQ4plex); K7(iTRAQ4plex)       | 1 | 1 |
| [R].IYGSEAFATDFQDSAAAK.[K]         | N-Term(iTRAQ4plex); K18(iTRAQ4plex)      | 1 | 1 |
| [K].mEEVEAmLLPETLk.[R]             | N-Term(iTRAQ4plex); M7(Oxidation)        | 1 | 1 |
| [K].qEDDLANINQWVv.[E]              | N-Term(iTRAQ4plex); K13(iTRAQ4plex)      | 1 | 1 |
| [R].IcQDLGPGAfR.[L]                | N-Term(iTRAQ4plex); C2(Carbamidomethyl)  | 1 | 1 |
| [R].qLTSGPNQEQVSPPLTLk.[L]         | N-Term(iTRAQ4plex); K18(iTRAQ4plex)      | 1 | 1 |
| [R].dPTPEQTHR.[L]                  | N-Term(iTRAQ4plex)                       | 1 | 1 |
| [R].IcQDLGPGAfR.[L]                | N-Term(iTRAQ4plex); C2(Carbamidomethyl)  | 1 | 1 |
| [R].IcQDLGPGAfR.[L]                | N-Term(iTRAQ4plex); C2(Carbamidomethyl)  | 1 | 1 |
| [R].IcQDLGPGAfR.[L]                | N-Term(iTRAQ4plex); C2(Carbamidomethyl)  | 1 | 1 |
| [R].dSFHLDEQFTVPVEMMQAR.[T]        | N-Term(iTRAQ4plex)                       | 1 | 1 |
| [R].dSFHLDEQFTVPVEMMQAR.[T]        | N-Term(iTRAQ4plex)                       | 1 | 1 |
| [K].gFPIKEDFLEQSEQLFGAKPVSLTGk.[Q] | N-Term(iTRAQ4plex); K5(iTRAQ4plex)       | 1 | 1 |
| [R].wFLLEQPEIQVAHFfK.[N]           | N-Term(iTRAQ4plex); K17(iTRAQ4plex)      | 1 | 1 |
| [R].wFLLEQPEIQVAHFfK.[N]           | N-Term(iTRAQ4plex); K17(iTRAQ4plex)      | 1 | 1 |
| [R].wFLLEQPEIQVAHFfK.[N]           | K17(iTRAQ4plex)                          | 1 | 1 |
| [R].wFLLEQPEIQVAHFfK.[N]           | N-Term(iTRAQ4plex); K17(iTRAQ4plex)      | 1 | 1 |
| [R].gDKLFGPDLk.[L]                 | N-Term(iTRAQ4plex); K3(iTRAQ4plex)       | 1 | 1 |
| [R].IQQVLHAGSGPcLPHLLSR.[L]        | N-Term(iTRAQ4plex); C12(Carbamidomethyl) | 1 | 1 |
| [R].IQQVLHAGSGPcLPHLLSR.[L]        | N-Term(iTRAQ4plex); C12(Carbamidomethyl) | 1 | 1 |
| [R].IQQVLHAGSGPcLPHLLSR.[L]        | N-Term(iTRAQ4plex); C12(Carbamidomethyl) | 1 | 1 |
| [K].hQMDLVATLSQLGLQELFQAPDLR.[G]   | N-Term(iTRAQ4plex)                       | 1 | 1 |
| [K].hQMDLVATLSQLGLQELFQAPDLR.[G]   | N-Term(iTRAQ4plex)                       | 1 | 1 |
| [R].eLkEQQDSPGNk.[D]               | N-Term(iTRAQ4plex); K3(iTRAQ4plex)       | 1 | 1 |
| [R].eLkEQQDSPGNk.[D]               | N-Term(iTRAQ4plex); K3(iTRAQ4plex)       | 1 | 1 |
| [K].IGNQEPGGQTALK.[S]              | N-Term(iTRAQ4plex); K13(iTRAQ4plex)      | 1 | 1 |
| [K].IGNQEPGGQTALK.[S]              | N-Term(iTRAQ4plex); K13(iTRAQ4plex)      | 1 | 1 |
| [K].eQQDSPGNk.[D]                  | N-Term(iTRAQ4plex); K9(iTRAQ4plex)       | 1 | 1 |
| [R].dSFHLDEQFTVPVEMMQAR.[T]        | N-Term(iTRAQ4plex)                       | 1 | 1 |
| [R].LcQDLGPGAfR.[L]                | C2(Carbamidomethyl)                      | 1 | 1 |
| [R].qLTSGPNQEQVSPPLTLk.[L]         | N-Term(iTRAQ4plex); K18(iTRAQ4plex)      | 1 | 1 |
| [K].dFLQSLk.[G]                    | N-Term(iTRAQ4plex); K7(iTRAQ4plex)       | 1 | 1 |
| [R].IQQVLHAGSGPcLPHLLSR.[L]        | N-Term(iTRAQ4plex); C12(Carbamidomethyl) | 1 | 1 |
| [R].NPNPSAPR.[E]                   |                                          | 1 | 1 |

|                                   |                                |   |   |
|-----------------------------------|--------------------------------|---|---|
| [K].qEDDLANINQWVvk.[E]            | N-Term(iTRAQ4plex); K13(iTRAQ4 | 1 | 1 |
| [R].NkFDPSLTQR.[D]                | K2(iTRAQ4plex)                 | 1 | 1 |
| [K].fDPSLTQR.[D]                  | N-Term(iTRAQ4plex)             | 1 | 1 |
| [K].dFLQSLk.[G]                   | N-Term(iTRAQ4plex); K7(iTRAQ4  | 1 | 1 |
| [R].dPTPEQTHR.[L]                 | N-Term(iTRAQ4plex)             | 1 | 1 |
| [R].nKFDPSLTQR.[D]                | N-Term(iTRAQ4plex)             | 1 | 1 |
| [R].nkFDPSLTQR.[D]                | N-Term(iTRAQ4plex); K2(iTRAQ4  | 1 | 1 |
| [R].LcQDLGPGAfR.[L]               | C2(Carbamidomethyl)            | 1 | 1 |
| [K].IFGPDLk.[L]                   | N-Term(iTRAQ4plex); K7(iTRAQ4  | 1 | 1 |
| [K].IVPPMEEDYPQFGSPk.[-]          | N-Term(iTRAQ4plex); K16(iTRAQ  | 1 | 1 |
| [R].nPNPSAPR.[E]                  | N-Term(iTRAQ4plex)             | 1 | 1 |
| [K].IGNQEPGGQTALK.[S]             | N-Term(iTRAQ4plex); K13(iTRAQ  | 1 | 1 |
| [K].qEDDLANINQWVvk.[E]            | N-Term(iTRAQ4plex); K13(iTRAQ  | 1 | 1 |
| [K].dFLQSLk.[G]                   | N-Term(iTRAQ4plex); K7(iTRAQ4  | 1 | 1 |
| [R].dPTPEQTHR.[L]                 | N-Term(iTRAQ4plex)             | 1 | 1 |
| [K].IFGPDLk.[L]                   | N-Term(iTRAQ4plex); K7(iTRAQ4  | 1 | 1 |
| [K].fDPSLTQR.[D]                  | N-Term(iTRAQ4plex)             | 1 | 1 |
| [K].fEGIAcEISk.[Q]                | N-Term(iTRAQ4plex); C6(Carbam  | 1 | 1 |
| [K].fEGIAcEISk.[Q]                | N-Term(iTRAQ4plex); C6(Carbam  | 1 | 1 |
| [K].fEGIAcEISk.[Q]                | N-Term(iTRAQ4plex); C6(Carbam  | 1 | 1 |
| [K].aEQccEETASSISLHGkGSFR.[F]     | N-Term(iTRAQ4plex); C4(Carbam  | 1 | 1 |
| [R].kYAFELk.[ME]                  | N-Term(iTRAQ4plex); K1(iTRAQ4  | 1 | 2 |
| [R].dVVLTTTFVDDIk.[A]             | N-Term(iTRAQ4plex); K13(iTRAQ  | 1 | 1 |
| [R].dVVLTTTFVDDIk.[A]             | N-Term(iTRAQ4plex); K13(iTRAQ  | 1 | 1 |
| [R].dVVLTTTFVDDIk.[A]             | N-Term(iTRAQ4plex); K13(iTRAQ  | 1 | 1 |
| [R].kYAFELk.[ME]                  | N-Term(iTRAQ4plex); K1(iTRAQ4  | 1 | 2 |
| [K].TSNFNAAISLk.[F]               | K11(iTRAQ4plex)                | 1 | 1 |
| [K].tsnfnAAISLk.[F]               | N-Term(iTRAQ4plex); K11(iTRAQ  | 1 | 1 |
| [K].tsnfnAAISLk.[F]               | N-Term(iTRAQ4plex); K11(iTRAQ  | 1 | 1 |
| [R].aIEDYINEFSVR.[K]              | N-Term(iTRAQ4plex)             | 1 | 1 |
| [R].aIEDYINEFSVR.[K]              | N-Term(iTRAQ4plex)             | 1 | 1 |
| [K].ISPIYNLVPVvk.[M]              | N-Term(iTRAQ4plex); K11(iTRAQ  | 1 | 1 |
| [R].dRDGNTLTYR.[R]                | N-Term(iTRAQ4plex)             | 1 | 1 |
| [R].tEHYEEQIEAFk.[S]              | N-Term(iTRAQ4plex); K12(iTRAQ  | 1 | 1 |
| [K].ISPIYNLVPVvk.[M]              | N-Term(iTRAQ4plex); K11(iTRAQ  | 1 | 1 |
| [R].tEHYEEQIEAFk.[S]              | N-Term(iTRAQ4plex); K12(iTRAQ  | 1 | 1 |
| [R].tEHYEEQIEAFk.[S]              | N-Term(iTRAQ4plex); K12(iTRAQ  | 1 | 1 |
| [R].vVEESELAR.[T]                 | N-Term(iTRAQ4plex)             | 1 | 1 |
| [K].aEQccEETASSISLHGk.[G]         | N-Term(iTRAQ4plex); C4(Carbam  | 1 | 1 |
| [R].rPWNVASLIYETk.[G]             | N-Term(iTRAQ4plex); K13(iTRAQ  | 1 | 1 |
| [R].rPWNVASLIYETk.[G]             | N-Term(iTRAQ4plex); K13(iTRAQ  | 1 | 1 |
| [R].qcVPTEPcEDAEDDcGNDFQcSTGR.[C] | N-Term(iTRAQ4plex); C2(Carbam  | 1 | 1 |
| [K].aLPTTYEK.[G]                  | N-Term(iTRAQ4plex); K8(iTRAQ4  | 1 | 1 |
| [R].rPWNVASLIYETk.[G]             | N-Term(iTRAQ4plex); K13(iTRAQ  | 1 | 1 |
| [R].qcVPTEPcEDAEDDcGNDFQcSTGR.[C] | N-Term(iTRAQ4plex); C2(Carbam  | 1 | 1 |
| [R].qcVPTEPcEDAEDDcGNDFQcSTGR.[C] | N-Term(iTRAQ4plex); C2(Carbam  | 1 | 1 |
| [R].vVEESELAR.[T]                 | N-Term(iTRAQ4plex)             | 1 | 1 |
| [R].rPWNVASLIYETk.[G]             | N-Term(iTRAQ4plex); K13(iTRAQ  | 1 | 1 |
| [R].dGNTLTYR.[R]                  | N-Term(iTRAQ4plex)             | 1 | 1 |
| [K].aEQccEETASSISLHGk.[G]         | N-Term(iTRAQ4plex); C4(Carbam  | 1 | 1 |
| [R].dVVLTTTFVDDIk.[A]             | N-Term(iTRAQ4plex); K13(iTRAQ  | 1 | 1 |
| [K].fTPETENk.[A]                  | N-Term(iTRAQ4plex); K8(iTRAQ4  | 1 | 1 |

|                                   |                                         |   |   |
|-----------------------------------|-----------------------------------------|---|---|
| [R].NRDVVLTTFVDDIk.[A]            | K15(iTRAQ4plex)                         | 1 | 1 |
| [R].TEHYEEQIEAFk.[S]              | K12(iTRAQ4plex)                         | 1 | 1 |
| [R].VVEESELAR.[T]                 |                                         | 1 | 1 |
| [R].dVVLTTFVDDIk.[A]              | N-Term(iTRAQ4plex); K13(iTRAQ4plex)     | 1 | 1 |
| [R].vVEESELAR.[T]                 | N-Term(iTRAQ4plex)                      | 1 | 1 |
| [K].FTPTETNk.[A]                  | K8(iTRAQ4plex)                          | 1 | 1 |
| [K].FEGIAcEISk.[Q]                | C6(Carbamidomethyl); K10(iTRAQ4plex)    | 1 | 1 |
| [R].DGNTLTYR.[R]                  |                                         | 1 | 1 |
| [K].cLcAcPFk.[F]                  | N-Term(iTRAQ4plex); C1(Carbamidomethyl) | 1 | 1 |
| [R].qcVPTEPcEDAEDDcGNDFQcSTGR.[C] | N-Term(iTRAQ4plex); C2(Carbamidomethyl) | 1 | 1 |
| [K].ISPIYNLVPVv.[M]               | N-Term(iTRAQ4plex); K11(iTRAQ4plex)     | 1 | 1 |
| [K].tSNFNAAISLk.[F]               | N-Term(iTRAQ4plex); K11(iTRAQ4plex)     | 1 | 1 |
| [K].gEIHLGR.[F]                   | N-Term(iTRAQ4plex)                      | 1 | 1 |
| [R].VVEESELAR.[T]                 |                                         | 1 | 1 |
| [K].cLcAcPFk.[F]                  | N-Term(iTRAQ4plex); C1(Carbamidomethyl) | 1 | 1 |
| [R].dVVLTTFVDDIk.[A]              | N-Term(iTRAQ4plex); K13(iTRAQ4plex)     | 1 | 1 |
| [K].VTTSQDMLSIMEk.[L]             | K13(iTRAQ4plex)                         | 1 | 1 |
| [R].ILDSPDTR.[L]                  | N-Term(iTRAQ4plex)                      | 1 | 1 |
| [K].dFTcVHQALk.[G]                | N-Term(iTRAQ4plex); C4(Carbamidomethyl) | 1 | 1 |
| [K].dFTcVHQALk.[G]                | N-Term(iTRAQ4plex); C4(Carbamidomethyl) | 1 | 1 |
| [K].dFTcVHQALk.[G]                | N-Term(iTRAQ4plex); C4(Carbamidomethyl) | 1 | 1 |
| [K].IYHAFSAMk.[K]                 | N-Term(iTRAQ4plex); K9(iTRAQ4plex)      | 1 | 1 |
| [K].dFTcVHQALk.[G]                | N-Term(iTRAQ4plex); C4(Carbamidomethyl) | 1 | 1 |
| [K].vATTVISk.[M]                  | N-Term(iTRAQ4plex); K8(iTRAQ4plex)      | 1 | 1 |
| [K].kYPVAHFIDQTLk.[A]             | N-Term(iTRAQ4plex); K1(iTRAQ4plex)      | 1 | 1 |
| [K].kYPVAHFIDQTLk.[A]             | N-Term(iTRAQ4plex); K1(iTRAQ4plex)      | 1 | 1 |
| [K].tNLESILSYPk.[D]               | N-Term(iTRAQ4plex); K11(iTRAQ4plex)     | 1 | 1 |
| [K].tNLESILSYPk.[D]               | N-Term(iTRAQ4plex); K11(iTRAQ4plex)     | 1 | 1 |
| [K].tNLESILSYPk.[D]               | N-Term(iTRAQ4plex); K11(iTRAQ4plex)     | 1 | 1 |
| [K].tNLESILSYPk.[D]               | N-Term(iTRAQ4plex); K11(iTRAQ4plex)     | 1 | 1 |
| [K].yPVAHFIDQTLk.[A]              | N-Term(iTRAQ4plex); K12(iTRAQ4plex)     | 1 | 1 |
| [K].yPVAHFIDQTLk.[A]              | N-Term(iTRAQ4plex); K12(iTRAQ4plex)     | 1 | 1 |
| [K].GVTSVSQIFHSPDLAIR.[D]         |                                         | 1 | 1 |
| [K].gVTSVSQIFHSPDLAIR.[D]         | N-Term(iTRAQ4plex)                      | 1 | 1 |
| [K].kYPVAHFIDQTLk.[A]             | N-Term(iTRAQ4plex); K1(iTRAQ4plex)      | 1 | 1 |
| [K].kYPVAHFIDQTLk.[A]             | N-Term(iTRAQ4plex); K1(iTRAQ4plex)      | 1 | 1 |
| [K].kYPVAHFIDQTLk.[A]             | N-Term(iTRAQ4plex); K1(iTRAQ4plex)      | 1 | 1 |
| [K].kYPVAHFIDQTLk.[A]             | N-Term(iTRAQ4plex); K1(iTRAQ4plex)      | 1 | 1 |
| [K].kYPVAHFIDQTLk.[A]             | N-Term(iTRAQ4plex); K1(iTRAQ4plex)      | 1 | 1 |
| [K].kYPVAHFIDQTLk.[A]             | N-Term(iTRAQ4plex); K1(iTRAQ4plex)      | 1 | 1 |
| [K].kYPVAHFIDQTLk.[A]             | N-Term(iTRAQ4plex); K1(iTRAQ4plex)      | 1 | 1 |
| [K].kYPVAHFIDQTLk.[A]             | N-Term(iTRAQ4plex); K1(iTRAQ4plex)      | 1 | 1 |
| [K].kYPVAHFIDQTLk.[A]             | N-Term(iTRAQ4plex); K1(iTRAQ4plex)      | 1 | 1 |
| [K].hRLEDMEQALSPSVFk.[A]          | N-Term(iTRAQ4plex); K16(iTRAQ4plex)     | 1 | 1 |
| [R].IEDmEQALSPSVFk.[A]            | N-Term(iTRAQ4plex); M4(Oxidation)       | 1 | 1 |
| [R].IEDmEQALSPSVFk.[A]            | N-Term(iTRAQ4plex); M4(Oxidation)       | 1 | 1 |
| [K].vTTSQDmLSIMEk.[L]             | N-Term(iTRAQ4plex); M7(Oxidation)       | 1 | 1 |
| [K].vTTSQDmLSIMEk.[L]             | N-Term(iTRAQ4plex); M7(Oxidation)       | 1 | 1 |
| [R].IEDMEQALSPSVFk.[A]            | N-Term(iTRAQ4plex); K14(iTRAQ4plex)     | 1 | 1 |
| [R].IEDMEQALSPSVFk.[A]            | N-Term(iTRAQ4plex); K14(iTRAQ4plex)     | 1 | 1 |

|                                   |                                         |   |   |
|-----------------------------------|-----------------------------------------|---|---|
| [R].IEDMEQALSPSVFk.[A]            | N-Term(iTRAQ4plex); K14(iTRAQ4plex)     | 1 | 1 |
| [K].TNLESILSYPK.[D]               | K11(iTRAQ4plex)                         | 1 | 1 |
| [K].vTTSQDMLSIMek.[L]             | N-Term(iTRAQ4plex); K13(iTRAQ4plex)     | 1 | 1 |
| [R].IVLLNAIYLSak.[W]              | N-Term(iTRAQ4plex); K12(iTRAQ4plex)     | 1 | 1 |
| [K].fQPTLLTLPR.[I]                | N-Term(iTRAQ4plex)                      | 1 | 1 |
| [K].gVTSVSQIFHSPDLAIR.[D]         | N-Term(iTRAQ4plex)                      | 1 | 1 |
| [K].gVTSVSQIFHSPDLAIR.[D]         | N-Term(iTRAQ4plex)                      | 1 | 1 |
| [R].IVLLNAIYLSak.[W]              | N-Term(iTRAQ4plex); K12(iTRAQ4plex)     | 1 | 1 |
| [K].gVTSVSQIFHSPDLAIR.[D]         | N-Term(iTRAQ4plex)                      | 1 | 1 |
| [R].tLLVFEVQQPFLFVLWDQQHkFPVFMGR. | N-Term(iTRAQ4plex); K21(iTRAQ4plex)     | 1 | 1 |
| [R].LLDSLPSDTR.[L]                |                                         | 1 | 1 |
| [K].vATTVISk.[M]                  | N-Term(iTRAQ4plex); K8(iTRAQ4plex)      | 1 | 1 |
| [R].ILDSPSDTR.[L]                 | N-Term(iTRAQ4plex)                      | 1 | 1 |
| [K].IYHAFSAMk.[K]                 | N-Term(iTRAQ4plex); K9(iTRAQ4plex)      | 1 | 1 |
| [R].ILDSPSDTR.[L]                 | N-Term(iTRAQ4plex)                      | 1 | 1 |
| [K].dFTcVHQALk.[G]                | N-Term(iTRAQ4plex); C4(Carbamidomethyl) | 1 | 1 |
| [K].dFTcVHQALk.[G]                | N-Term(iTRAQ4plex); C4(Carbamidomethyl) | 1 | 1 |
| [K].kYPVAHFIDQTLk.[A]             | N-Term(iTRAQ4plex); K13(iTRAQ4plex)     | 1 | 1 |
| [K].kYPVAHFIDQTLk.[A]             | K1(iTRAQ4plex); K13(iTRAQ4plex)         | 1 | 1 |
| [R].IEDMEQALSPSVFk.[A]            | N-Term(iTRAQ4plex); K14(iTRAQ4plex)     | 1 | 1 |
| [K].dFTcVHQALk.[G]                | N-Term(iTRAQ4plex); C4(Carbamidomethyl) | 1 | 1 |
| [K].gVTSVSQIFHSPDLAIR.[D]         | N-Term(iTRAQ4plex)                      | 1 | 1 |
| [R].ILDSPSDTR.[L]                 | N-Term(iTRAQ4plex)                      | 1 | 1 |
| [K].kYPVAHFIDQTLk.[A]             | K1(iTRAQ4plex); K13(iTRAQ4plex)         | 1 | 1 |
| [K].kYPVAHFIDQTLk.[A]             | N-Term(iTRAQ4plex); K13(iTRAQ4plex)     | 1 | 1 |
| [K].dFTcVHQALk.[G]                | N-Term(iTRAQ4plex); C4(Carbamidomethyl) | 1 | 1 |
| [R].LEDMEQALSPSVFk.[A]            | K14(iTRAQ4plex)                         | 1 | 1 |
| [K].kYPVAHFIDQTLk.[A]             | N-Term(iTRAQ4plex); K1(iTRAQ4plex)      | 1 | 1 |
| [K].DFTcVHQALk.[G]                | C4(Carbamidomethyl); K10(iTRAQ4plex)    | 1 | 1 |
| [K].fQPTLLTLPR.[I]                |                                         | 1 | 1 |
| [R].IEDMEQALSPSVFk.[A]            | N-Term(iTRAQ4plex); K14(iTRAQ4plex)     | 1 | 1 |
| [R].mEPFHFk.[N]                   | N-Term(iTRAQ4plex); K7(iTRAQ4plex)      | 1 | 1 |
| [K].tNLESILSYPK.[D]               | N-Term(iTRAQ4plex); K11(iTRAQ4plex)     | 1 | 1 |
| [K].DFTcVHQALk.[G]                | C4(Carbamidomethyl); K10(iTRAQ4plex)    | 1 | 1 |
| [R].mEPFHFk.[N]                   | N-Term(iTRAQ4plex); K7(iTRAQ4plex)      | 1 | 1 |
| [R].mEPFHFk.[N]                   | N-Term(iTRAQ4plex); K7(iTRAQ4plex)      | 1 | 1 |
| [K].TNLESILSYPK.[D]               | K11(iTRAQ4plex)                         | 1 | 1 |
| [K].LYHAFSAMk.[K]                 | K9(iTRAQ4plex)                          | 1 | 1 |
| [K].dFTcVHQALk.[G]                | N-Term(iTRAQ4plex); C4(Carbamidomethyl) | 1 | 1 |
| [R].TLYSSPR.[V]                   |                                         | 1 | 1 |
| [R].vLSNNSDANLELINTWVak.[N]       | N-Term(iTRAQ4plex); K19(iTRAQ4plex)     | 1 | 1 |
| [K].yPVAHFIDQTLk.[A]              | N-Term(iTRAQ4plex); K12(iTRAQ4plex)     | 1 | 1 |
| [R].ILDSPSDTR.[L]                 | N-Term(iTRAQ4plex)                      | 1 | 1 |
| [R].mEPFHFk.[N]                   | N-Term(iTRAQ4plex); M1(Oxidation)       | 1 | 1 |
| [K].FPVFMGR.[V]                   |                                         | 1 | 1 |
| [R].ILDSPSDTR.[L]                 | N-Term(iTRAQ4plex)                      | 1 | 1 |
| [K].kYPVAHFIDQTLk.[A]             | N-Term(iTRAQ4plex); K1(iTRAQ4plex)      | 1 | 1 |
| [K].gVTSVSQIFHSPDLAIR.[D]         | N-Term(iTRAQ4plex)                      | 1 | 1 |
| [K].nTNNkISR.[L]                  | N-Term(iTRAQ4plex); K5(iTRAQ4plex)      | 1 | 1 |
| [K].tNLESILSYPK.[D]               | N-Term(iTRAQ4plex); K11(iTRAQ4plex)     | 1 | 1 |
| [K].gVTSVSQIFHSPDLAIR.[D]         | N-Term(iTRAQ4plex)                      | 1 | 1 |
| [K].vPMMNSk.[K]                   | N-Term(iTRAQ4plex); K7(iTRAQ4plex)      | 1 | 1 |



|                                     |                                |   |   |
|-------------------------------------|--------------------------------|---|---|
| [R].LLDSLPSDTR.[L]                  |                                | 1 | 1 |
| [K].dFTcVHQALK.[G]                  | N-Term(iTRAQ4plex); C4(Carbam  | 1 | 1 |
| [R].mEPFHFk.[N]                     | N-Term(iTRAQ4plex); K7(iTRAQ4  | 1 | 1 |
| [R].LEDMEQALSPSVFk.[A]              | K14(iTRAQ4plex)                | 1 | 1 |
| [R].IVLLNAIYLSak.[W]                | N-Term(iTRAQ4plex); K12(iTRAQ  | 1 | 1 |
| [R].mEPFHFk.[N]                     | N-Term(iTRAQ4plex); K7(iTRAQ4  | 1 | 1 |
| [R].TLYSSSPR.[V]                    |                                | 1 | 1 |
| [K].hrLEDMEQALSPSVFk.[A]            | N-Term(iTRAQ4plex); K16(iTRAQ  | 1 | 1 |
| [R].IEDmEQALSPSVFk.[A]              | N-Term(iTRAQ4plex); M4(Oxidati | 1 | 1 |
| [K].DFTcVHQALK.[G]                  | C4(Carbamidomethyl); K10(iTRA  | 1 | 1 |
| [R].IEDMEQALSPSVFK.[A]              | N-Term(iTRAQ4plex)             | 1 | 1 |
| [R].TLYSSSPR.[V]                    |                                | 1 | 1 |
| [K].gVTSVSQIFHSPDLAIR.[D]           | N-Term(iTRAQ4plex)             | 1 | 1 |
| [K].tNLESILSYPK.[D]                 | N-Term(iTRAQ4plex); K11(iTRAQ  | 1 | 1 |
| [R].TLYSSSPR.[V]                    |                                | 1 | 1 |
| [R].cLPVcGkPVNPVEQR.[Q]             | N-Term(iTRAQ4plex); C1(Carbam  | 1 | 1 |
| [K].QRPPDLDTSSNAVDLLFFTDESGDSR.[G]  |                                | 1 | 1 |
| [R].iQYYcHEPYK.[M]                  | N-Term(iTRAQ4plex); C5(Carbam  | 1 | 1 |
| [R].iQYYcHEPYK.[M]                  | N-Term(iTRAQ4plex); C5(Carbam  | 1 | 1 |
| [K].IVFQQFDLEPSEGcFYDYVk.[I]        | N-Term(iTRAQ4plex); C14(Carbar | 1 | 1 |
| [R].IPVANPQAcENWLR.[G]              | N-Term(iTRAQ4plex); C9(Carbam  | 1 | 1 |
| [R].IPVANPQAcENWLR.[G]              | N-Term(iTRAQ4plex); C9(Carbam  | 1 | 1 |
| [R].fcGQLGSPLGNPPGk.[K]             | N-Term(iTRAQ4plex); C2(Carbam  | 1 | 1 |
| [R].fcGQLGSPLGNPPGk.[K]             | N-Term(iTRAQ4plex); C2(Carbam  | 1 | 1 |
| [K].qGYQLIEGNQVLHSFTAVcQDDGTWHR.[L] | N-Term(iTRAQ4plex); C19(Carbar | 1 | 1 |
| [K].gFLAYQAVDLDEcASR.[S]            | N-Term(iTRAQ4plex); C14(Carbar | 1 | 1 |
| [K].gFLAYQAVDLDEcASR.[S]            | N-Term(iTRAQ4plex); C14(Carbar | 1 | 1 |
| [K].qRPPDLDTSSNAVDLLFFTDESGDSR.[G]  | N-Term(iTRAQ4plex)             | 1 | 1 |
| [K].qRPPDLDTSSNAVDLLFFTDESGDSR.[G]  | N-Term(iTRAQ4plex)             | 1 | 1 |
| [K].IVFQQFDLEPSEGcFYDYVk.[I]        | N-Term(iTRAQ4plex); C14(Carbar | 1 | 1 |
| [K].IVFQQFDLEPSEGcFYDYVk.[I]        | N-Term(iTRAQ4plex); C14(Carbar | 1 | 1 |
| [K].KEFMSQGNk.[M]                   | N-Term(iTRAQ4plex); K1(iTRAQ4  | 1 | 1 |
| [K].mGNFPWQVFTNIHGR.[G]             | N-Term(iTRAQ4plex)             | 1 | 1 |
| [K].mGNFPWQVFTNIHGR.[G]             | N-Term(iTRAQ4plex)             | 1 | 1 |
| [R].gGGALLGDR.[W]                   | N-Term(iTRAQ4plex)             | 2 | 2 |
| [R].iQYYcHEPYK.[M]                  | N-Term(iTRAQ4plex); C5(Carbam  | 1 | 1 |
| [R].dYFIATck.[Q]                    | N-Term(iTRAQ4plex); C7(Carbam  | 1 | 1 |
| [K].tLDEFTIIQNLQPQYQFR.[D]          | N-Term(iTRAQ4plex)             | 1 | 1 |
| [R].eSEQGVYTcTAQGIWk.[N]            | N-Term(iTRAQ4plex); C9(Carbam  | 1 | 1 |
| [R].wILTAHTLYPK.[DE]                | N-Term(iTRAQ4plex); K12(iTRAQ  | 1 | 1 |
| [R].wILTAHTLYPK.[DE]                | N-Term(iTRAQ4plex); K12(iTRAQ  | 1 | 1 |
| [R].eSEQGVYTcTAQGIWk.[N]            | N-Term(iTRAQ4plex); C9(Carbam  | 1 | 1 |
| [R].gLTLHLk.[F]                     | N-Term(iTRAQ4plex); K7(iTRAQ4  | 1 | 1 |
| [R].yTTTMGVNTYk.[A]                 | N-Term(iTRAQ4plex); K11(iTRAQ  | 1 | 1 |
| [R].IPVANPQAcENWLR.[G]              | N-Term(iTRAQ4plex); C9(Carbam  | 1 | 1 |
| [K].vLNYVDWIK.[K]                   | N-Term(iTRAQ4plex); K9(iTRAQ4  | 1 | 1 |
| [R].gYGFYTK.[V]                     | N-Term(iTRAQ4plex); K7(iTRAQ4  | 1 | 1 |
| [K].gFLAYQAVDLDEcASR.[S]            | N-Term(iTRAQ4plex); C14(Carbar | 1 | 1 |
| [R].YTTEIK.[C]                      | K7(iTRAQ4plex)                 | 1 | 1 |
| [K].NIGEFcGk.[Q]                    | N-Term(iTRAQ4plex); C6(Carbam  | 1 | 1 |
| [R].wILTAHTLYPK.[DE]                | N-Term(iTRAQ4plex); K12(iTRAQ  | 1 | 1 |
| [R].vSVHPDYR.[Q]                    | N-Term(iTRAQ4plex)             | 1 | 1 |

|                                 |                                |   |   |
|---------------------------------|--------------------------------|---|---|
| [R].dYFIATck.[Q]                | N-Term(iTRAQ4plex); C7(Carbam  | 1 | 1 |
| [R].wILTAHTLYPk.[DE]            | N-Term(iTRAQ4plex); K12(iTRAQ  | 1 | 1 |
| [R].aATVGSLAGQPLOER.[A]         | N-Term(iTRAQ4plex)             | 1 | 1 |
| [R].LGPLVEQGR.[V]               |                                | 1 | 1 |
| [K].SWFEPLVEDMQR.[Q]            |                                | 1 | 1 |
| [K].SWFEPLVEDMQR.[Q]            |                                | 1 | 1 |
| [R].gEVQAMLGQSTEELR.[V]         | N-Term(iTRAQ4plex)             | 1 | 1 |
| [R].gEVQAMLGQSTEELR.[V]         | N-Term(iTRAQ4plex)             | 1 | 1 |
| [R].gEVQAMLGQSTEELR.[V]         | N-Term(iTRAQ4plex)             | 1 | 1 |
| [R].IQAEAFQAR.[L]               | N-Term(iTRAQ4plex)             | 1 | 1 |
| [R].aATVGSLAGQPLOER.[A]         | N-Term(iTRAQ4plex)             | 1 | 1 |
| [R].aATVGSLAGQPLOER.[A]         | N-Term(iTRAQ4plex)             | 1 | 1 |
| [R].qWAGLVEk.[V]                | N-Term(iTRAQ4plex); K8(iTRAQ4  | 1 | 1 |
| [R].qWAGLVEk.[V]                | N-Term(iTRAQ4plex); K8(iTRAQ4  | 1 | 1 |
| [R].IAVYQAGAR.[E]               | N-Term(iTRAQ4plex)             | 1 | 1 |
| [R].aATVGSLAGQPLOER.[A]         | N-Term(iTRAQ4plex)             | 1 | 1 |
| [R].LQAEAFQAR.[L]               |                                | 1 | 1 |
| [K].sWFEPLEDMQR.[Q]             | N-Term(iTRAQ4plex)             | 1 | 1 |
| [K].sWFEPLEDMQR.[Q]             | N-Term(iTRAQ4plex)             | 1 | 1 |
| [R].WVQTLSEQVQEELLSSQVTQELR.[A] |                                | 1 | 1 |
| [R].akLEEQAQIR.[L]              | N-Term(iTRAQ4plex); K2(iTRAQ4  | 1 | 1 |
| [R].LGADMEDVcGR.[L]             | C9(Carbamidomethyl)            | 1 | 1 |
| [R].aLMDETMk.[E]                | N-Term(iTRAQ4plex); K8(iTRAQ4  | 1 | 1 |
| [K].SELEEQLTPVAEETR.[A]         |                                | 1 | 1 |
| [K].sELEEQLTPVAEETR.[A]         | N-Term(iTRAQ4plex)             | 1 | 1 |
| [K].sELEEQLTPVAEETR.[A]         | N-Term(iTRAQ4plex)             | 1 | 1 |
| [K].sELEEQLTPVAEETR.[A]         | N-Term(iTRAQ4plex)             | 1 | 1 |
| [K].sELEEQLTPVAEETR.[A]         | N-Term(iTRAQ4plex)             | 1 | 1 |
| [R].gEVQAmLGQSTEELR.[V]         | N-Term(iTRAQ4plex); M6(Oxidati | 1 | 1 |
| [R].gEVQAmLGQSTEELR.[V]         | N-Term(iTRAQ4plex); M6(Oxidati | 1 | 1 |
| [R].dADDLQk.[R]                 | N-Term(iTRAQ4plex); K7(iTRAQ4  | 1 | 1 |
| [K].vQAAVGTSAAPVPSDNH.[-]       | N-Term(iTRAQ4plex)             | 1 | 1 |
| [R].qQTEWQSGQR.[W]              | N-Term(iTRAQ4plex)             | 1 | 1 |
| [R].qQTEWQSGQR.[W]              | N-Term(iTRAQ4plex)             | 1 | 1 |
| [K].LEEQAQIR.[L]                |                                | 1 | 1 |
| [K].vEQAVETEPEPELR.[Q]          | N-Term(iTRAQ4plex)             | 1 | 1 |
| [K].vEQAVETEPEPELR.[Q]          | N-Term(iTRAQ4plex)             | 1 | 1 |
| [K].vEQAVETEPEPELR.[Q]          | N-Term(iTRAQ4plex)             | 1 | 1 |
| [R].dADDLQk.[R]                 | N-Term(iTRAQ4plex); K7(iTRAQ4  | 1 | 1 |
| [R].ARMEEMGSR.[T]               |                                | 1 | 1 |
| [R].dRDLDEVk.[E]                | N-Term(iTRAQ4plex); K7(iTRAQ4  | 1 | 1 |
| [R].LSkELQAAQAR.[L]             | K3(iTRAQ4plex)                 | 1 | 1 |
| [K].sELEEQLTPVAEETR.[A]         | N-Term(iTRAQ4plex)             | 1 | 1 |
| [R].dRDLDEVk.[E]                | N-Term(iTRAQ4plex); K7(iTRAQ4  | 1 | 1 |
| [R].IGADmEDVcGR.[L]             | N-Term(iTRAQ4plex); M5(Oxidati | 1 | 1 |
| [R].ISkELQAAQAR.[L]             | N-Term(iTRAQ4plex); K3(iTRAQ4  | 1 | 1 |
| [R].akLEEQAQIR.[L]              | N-Term(iTRAQ4plex); K2(iTRAQ4  | 1 | 1 |
| [R].IQAEAFQAR.[L]               | N-Term(iTRAQ4plex)             | 1 | 1 |
| [R].AKLEEQAQIR.[L]              | K2(iTRAQ4plex)                 | 1 | 1 |
| [R].IGPLVEQGR.[V]               | N-Term(iTRAQ4plex)             | 1 | 1 |
| [R].qWAGLVEk.[V]                | N-Term(iTRAQ4plex); K8(iTRAQ4  | 1 | 1 |
| [R].LAVYQAGAR.[E]               |                                | 1 | 1 |

|                                    |                                |   |   |
|------------------------------------|--------------------------------|---|---|
| [R].dADDLQk.[R]                    | N-Term(iTRAQ4plex); K7(iTRAQ4  | 1 | 1 |
| [R].dRLDEVk.[E]                    | N-Term(iTRAQ4plex); K7(iTRAQ4  | 1 | 1 |
| [R].aLmDETMk.[E]                   | N-Term(iTRAQ4plex); M3(Oxidati | 1 | 1 |
| [R].qWAGLVEk.[V]                   | N-Term(iTRAQ4plex); K8(iTRAQ4  | 1 | 1 |
| [K].eLQAAQAR.[L]                   | N-Term(iTRAQ4plex)             | 1 | 1 |
| [K].IEEQAQQIR.[L]                  | N-Term(iTRAQ4plex)             | 1 | 1 |
| [R].QQTEWQSGQR.[W]                 |                                | 1 | 1 |
| [K].IEEQAQQIR.[L]                  | N-Term(iTRAQ4plex)             | 1 | 1 |
| [R].LGPLVEQGRVR.[A]                |                                | 1 | 1 |
| [R].IGPLVEQGR.[V]                  | N-Term(iTRAQ4plex)             | 1 | 1 |
| [R].AATVGLAGQPLQER.[A]             |                                | 1 | 1 |
| [R].dADDLQk.[R]                    | N-Term(iTRAQ4plex); K7(iTRAQ4  | 1 | 1 |
| [R].IGPLVEQGR.[V]                  | N-Term(iTRAQ4plex)             | 1 | 1 |
| [K].SELEEQLTPVAEETR.[A]            |                                | 1 | 1 |
| [R].dADDLQk.[R]                    | N-Term(iTRAQ4plex); K7(iTRAQ4  | 1 | 1 |
| [R].dRLDEVk.[E]                    | N-Term(iTRAQ4plex); K7(iTRAQ4  | 1 | 1 |
| [R].aLmDETMk.[E]                   | N-Term(iTRAQ4plex); M3(Oxidati | 1 | 1 |
| [R].qQTEWQSGQR.[W]                 | N-Term(iTRAQ4plex)             | 1 | 1 |
| [K].vEQAVETEPEPELR.[Q]             | N-Term(iTRAQ4plex)             | 1 | 1 |
| [R].LAVYQAGAR.[E]                  |                                | 1 | 1 |
| [R].dADDLQk.[R]                    | N-Term(iTRAQ4plex); K7(iTRAQ4  | 1 | 1 |
| [R].aLMDETMk.[E]                   | N-Term(iTRAQ4plex); M7(Oxidati | 1 | 1 |
| [R].dADDLQk.[R]                    | N-Term(iTRAQ4plex); K7(iTRAQ4  | 1 | 1 |
| [R].aLMDETMk.[E]                   | N-Term(iTRAQ4plex); M7(Oxidati | 1 | 1 |
| [K].seLEEQLTPVAEETR.[A]            | N-Term(iTRAQ4plex)             | 1 | 1 |
| [K].eLQAAQAR.[L]                   | N-Term(iTRAQ4plex)             | 1 | 1 |
| [R].aATVGLAGQPLQER.[A]             | N-Term(iTRAQ4plex)             | 1 | 1 |
| [R].tPWHVTIKPk.[S]                 | N-Term(iTRAQ4plex); K8(iTRAQ4  | 1 | 1 |
| [R].tPWHVTIKPk.[S]                 | N-Term(iTRAQ4plex); K8(iTRAQ4  | 1 | 1 |
| [R].tPWHVTIKPk.[S]                 | N-Term(iTRAQ4plex); K8(iTRAQ4  | 1 | 1 |
| [R].dFHINLFR.[M]                   | N-Term(iTRAQ4plex)             | 1 | 1 |
| [K].mGVEWTScaEVVSQEk.[T]           | N-Term(iTRAQ4plex); C8(Carbam  | 1 | 1 |
| [R].eVVTDQFLcSGTQEDESPckGESGGAVFLE | N-Term(iTRAQ4plex); C9(Carbam  | 1 | 1 |
| [R].tPWHVTIKPk.[S]                 | N-Term(iTRAQ4plex); K8(iTRAQ4  | 1 | 1 |
| [R].hAIIILLTDGk.[S]                | N-Term(iTRAQ4plex); K10(iTRAQ  | 1 | 1 |
| [R].hAIIILLTDGk.[S]                | N-Term(iTRAQ4plex); K10(iTRAQ  | 1 | 1 |
| [R].hAIIILLTDGk.[S]                | N-Term(iTRAQ4plex); K10(iTRAQ  | 1 | 1 |
| [R].hAIIILLTDGk.[S]                | N-Term(iTRAQ4plex); K10(iTRAQ  | 1 | 1 |
| [K].aVISPGFDVFAk.[K]               | N-Term(iTRAQ4plex); K12(iTRAQ  | 1 | 1 |
| [K].aVISPGFDVFAk.[K]               | N-Term(iTRAQ4plex); K12(iTRAQ  | 1 | 1 |
| [R].hAIIILLTDGk.[S]                | N-Term(iTRAQ4plex); K10(iTRAQ  | 1 | 1 |
| [K].kNQGILEFYGDDIALLk.[L]          | N-Term(iTRAQ4plex); K1(iTRAQ4  | 1 | 1 |
| [K].nQGILEFYGDDIALLk.[L]           | N-Term(iTRAQ4plex); K16(iTRAQ  | 1 | 1 |
| [K].nQGILEFYGDDIALLk.[L]           | N-Term(iTRAQ4plex); K16(iTRAQ  | 1 | 1 |
| [K].rNDYLDIYAIGVGk.[L]             | N-Term(iTRAQ4plex); K14(iTRAQ  | 1 | 1 |
| [R].eVVTDQFLcSGTQEDESPck.[G]       | N-Term(iTRAQ4plex); C9(Carbam  | 1 | 1 |
| [R].eVVTDQFLcSGTQEDESPck.[G]       | N-Term(iTRAQ4plex); C9(Carbam  | 1 | 1 |
| [R].dHENELLNk.[Q]                  | N-Term(iTRAQ4plex); K9(iTRAQ4  | 1 | 1 |
| [R].dHENELLNk.[Q]                  | N-Term(iTRAQ4plex); K9(iTRAQ4  | 1 | 1 |
| [R].eLNELGsk.[K]                   | N-Term(iTRAQ4plex); K8(iTRAQ4  | 1 | 1 |
| [R].dGNDHSLWR.[V]                  | N-Term(iTRAQ4plex)             | 1 | 1 |
| [K].SSGQWQTPGATR.[S]               | N-Term(iTRAQ4plex)             | 1 | 1 |

|                               |                                          |   |   |
|-------------------------------|------------------------------------------|---|---|
| [K].sSGQWQTPGATR.[S]          | N-Term(iTRAQ4plex)                       | 1 | 1 |
| [K].aLHQVFEHMLDVsk.[L]        | N-Term(iTRAQ4plex); K14(iTRAQ4plex)      | 1 | 1 |
| [K].aLHQVFEHMLDVsk.[L]        | N-Term(iTRAQ4plex); K14(iTRAQ4plex)      | 1 | 1 |
| [K].aLHQVFEHMLDVsk.[L]        | N-Term(iTRAQ4plex); K14(iTRAQ4plex)      | 1 | 1 |
| [K].vLMSVLNDNSR.[D]           | N-Term(iTRAQ4plex)                       | 1 | 1 |
| [R].fFQVGLVSWGLYNPcLGSADk.[N] | N-Term(iTRAQ4plex); C15(Carbamidomethyl) | 1 | 1 |
| [R].tPWHVTIkPk.[S]            | N-Term(iTRAQ4plex); K8(iTRAQ4plex)       | 1 | 1 |
| [K].gESGGAVFLER.[R]           | N-Term(iTRAQ4plex)                       | 1 | 1 |
| [K].aVISPGFDVFAk.[K]          | N-Term(iTRAQ4plex); K12(iTRAQ4plex)      | 1 | 1 |
| [R].dGNDHSLWR.[V]             | N-Term(iTRAQ4plex)                       | 1 | 1 |
| [R].hAFILQDTk.[A]             | N-Term(iTRAQ4plex); K9(iTRAQ4plex)       | 1 | 1 |
| [R].HAIIILLTDGk.[S]           | K10(iTRAQ4plex)                          | 1 | 1 |
| [R].dFHINLFR.[M]              | N-Term(iTRAQ4plex)                       | 1 | 1 |
| [R].tPWHVTIkPk.[S]            | N-Term(iTRAQ4plex); K8(iTRAQ4plex)       | 1 | 1 |
| [K].sNMGGSPk.[T]              | N-Term(iTRAQ4plex); K8(iTRAQ4plex)       | 1 | 1 |
| [K].vLMSVLNDNSR.[D]           | N-Term(iTRAQ4plex)                       | 1 | 1 |
| [R].DHENELLNk.[Q]             | K9(iTRAQ4plex)                           | 1 | 1 |
| [R].dHENELLNk.[Q]             | N-Term(iTRAQ4plex); K9(iTRAQ4plex)       | 1 | 1 |
| [K].ALHQVFEHMLDVsk.[L]        | K14(iTRAQ4plex)                          | 1 | 1 |
| [R].hAFILQDTk.[A]             | N-Term(iTRAQ4plex); K9(iTRAQ4plex)       | 1 | 1 |
| [R].dHENELLNk.[Q]             | N-Term(iTRAQ4plex); K9(iTRAQ4plex)       | 1 | 1 |
| [R].hAFILQDTk.[A]             | N-Term(iTRAQ4plex); K9(iTRAQ4plex)       | 1 | 1 |
| [R].tPWHVTIkPk.[S]            | N-Term(iTRAQ4plex); K8(iTRAQ4plex)       | 1 | 1 |
| [R].eILNINQk.[R]              | N-Term(iTRAQ4plex); K8(iTRAQ4plex)       | 1 | 1 |
| [R].hAIILLTDGk.[S]            | N-Term(iTRAQ4plex); K10(iTRAQ4plex)      | 1 | 1 |
| [R].hAIILLTDGk.[S]            | N-Term(iTRAQ4plex); K10(iTRAQ4plex)      | 1 | 1 |
| [R].hAFILQDTk.[A]             | N-Term(iTRAQ4plex); K9(iTRAQ4plex)       | 1 | 1 |
| [K].gESGGAVFLER.[R]           | N-Term(iTRAQ4plex)                       | 1 | 1 |
| [R].TPWHVTIkPk.[S]            | K8(iTRAQ4plex); K10(iTRAQ4plex)          | 1 | 1 |
| [R].dMTEVISSLENANYk.[D]       | N-Term(iTRAQ4plex); K15(iTRAQ4plex)      | 1 | 1 |
| [R].dMTEVISSLENANYk.[D]       | N-Term(iTRAQ4plex); K15(iTRAQ4plex)      | 1 | 1 |
| [K].VLMSVLNDNSR.[D]           |                                          | 1 | 1 |
| [R].hAIILLTDGk.[S]            | N-Term(iTRAQ4plex); K10(iTRAQ4plex)      | 1 | 1 |
| [R].hAFILQDTk.[A]             | N-Term(iTRAQ4plex); K9(iTRAQ4plex)       | 1 | 1 |
| [R].dMTEVISSLENANYk.[D]       | N-Term(iTRAQ4plex); K15(iTRAQ4plex)      | 1 | 1 |
| [R].dGNDHSLWR.[V]             | N-Term(iTRAQ4plex)                       | 1 | 1 |
| [R].dFHINLFR.[M]              | N-Term(iTRAQ4plex)                       | 1 | 1 |
| [R].eVVTDQFLcSGTQEDESPck.[G]  | N-Term(iTRAQ4plex); C9(Carbamidomethyl)  | 1 | 1 |
| [K].aVISPGFDVFAk.[K]          | N-Term(iTRAQ4plex); K12(iTRAQ4plex)      | 1 | 1 |
| [K].eVIITGIQTQGAk.[H]         | N-Term(iTRAQ4plex); K13(iTRAQ4plex)      | 1 | 1 |
| [K].eVIITGIQTQGAk.[H]         | N-Term(iTRAQ4plex); K13(iTRAQ4plex)      | 1 | 1 |
| [K].aDkPLSIHPQGIR.[Y]         | N-Term(iTRAQ4plex); K3(iTRAQ4plex)       | 1 | 1 |
| [R].aADIEQQAVFAVFDENk.[S]     | N-Term(iTRAQ4plex); K17(iTRAQ4plex)      | 1 | 1 |
| [K].iTAIITQGck.[S]            | N-Term(iTRAQ4plex); C9(Carbamidomethyl)  | 1 | 1 |
| [R].gEYEEHLGILGPIIR.[A]       | N-Term(iTRAQ4plex)                       | 1 | 1 |
| [K].gTLTEGGTQk.[T]            | N-Term(iTRAQ4plex); K10(iTRAQ4plex)      | 1 | 1 |
| [K].nFFNPPIISR.[F]            | N-Term(iTRAQ4plex)                       | 1 | 1 |
| [R].eTDIEDSDDIPEDTTYk.[K]     | N-Term(iTRAQ4plex); K17(iTRAQ4plex)      | 1 | 1 |
| [R].eTDIEDSDDIPEDTTYk.[K]     | N-Term(iTRAQ4plex); K17(iTRAQ4plex)      | 1 | 1 |
| [R].sEAYNTFSER.[R]            | N-Term(iTRAQ4plex)                       | 1 | 1 |
| [K].kITAIITQGck.[S]           | N-Term(iTRAQ4plex); K1(iTRAQ4plex)       | 1 | 1 |
| [K].eDGILGPIIR.[A]            | N-Term(iTRAQ4plex)                       | 1 | 1 |

|                                  |                                |   |   |
|----------------------------------|--------------------------------|---|---|
| [K].fcENPDEVkR.[D]               | N-Term(iTRAQ4plex); C2(Carbam  | 1 | 1 |
| [K].iTAITQGck.[S]                | N-Term(iTRAQ4plex); C9(Carbam  | 1 | 1 |
| [K].mDDAVAPGR.[E]                | N-Term(iTRAQ4plex)             | 1 | 1 |
| [K].tYEDDSPEWfk.[E]              | N-Term(iTRAQ4plex); K11(iTRAQ  | 1 | 1 |
| [K].hSLVLHk.[S]                  | N-Term(iTRAQ4plex); K7(iTRAQ4  | 1 | 1 |
| [R].IAAALGIR.[S]                 | N-Term(iTRAQ4plex)             | 1 | 1 |
| [K].ftVNNLAEPQk.[A]              | N-Term(iTRAQ4plex); K11(iTRAQ  | 1 | 1 |
| [K].rHEDTLTLFPMR.[G]             | N-Term(iTRAQ4plex)             | 1 | 1 |
| [K].fcENPDEVk.[R]                | N-Term(iTRAQ4plex); C2(Carbam  | 1 | 1 |
| [R].sQHLDNFSNQIGk.[H]            | N-Term(iTRAQ4plex); K13(iTRAQ  | 1 | 1 |
| [R].gEYEEHLGILGPIIR.[A]          | N-Term(iTRAQ4plex)             | 1 | 1 |
| [R].ITSSEMk.[K]                  | N-Term(iTRAQ4plex); K7(iTRAQ4  | 1 | 1 |
| [R].hEDTLTLFPMR.[G]              | N-Term(iTRAQ4plex)             | 1 | 1 |
| [R].gEcQAEGVLFFQGDR.[E]          | N-Term(iTRAQ4plex); C3(Carbam  | 1 | 1 |
| [R].gEcQAEGVLFFQGDR.[E]          | N-Term(iTRAQ4plex); C3(Carbam  | 1 | 1 |
| [R].gEcQAEGVLFFQGDR.[E]          | N-Term(iTRAQ4plex); C3(Carbam  | 1 | 1 |
| [R].YYcFQGNQFLR.[F]              | C3(Carbamidomethyl)            | 1 | 1 |
| [K].SGAQATWTELPWPHEk.[V]         | K16(iTRAQ4plex)                | 1 | 1 |
| [K].SGAQATWTELPWPHEk.[V]         | K16(iTRAQ4plex)                | 1 | 1 |
| [R].qGHNSVFLIk.[G]               | N-Term(iTRAQ4plex); K10(iTRAQ  | 1 | 1 |
| [R].QGNSVFLIk.[G]                | K10(iTRAQ4plex)                | 1 | 1 |
| [R].qGHNSVFLIk.[G]               | N-Term(iTRAQ4plex); K10(iTRAQ  | 1 | 1 |
| [R].qGHNSVFLIk.[G]               | N-Term(iTRAQ4plex); K10(iTRAQ  | 1 | 1 |
| [R].qGHNSVFLIk.[G]               | N-Term(iTRAQ4plex); K10(iTRAQ  | 1 | 1 |
| [R].QGNSVFLIk.[G]                | K10(iTRAQ4plex)                | 1 | 1 |
| [R].qGHNSVFLIk.[G]               | N-Term(iTRAQ4plex); K10(iTRAQ  | 1 | 1 |
| [R].gEcQAEGVLFFQGDR.[E]          | N-Term(iTRAQ4plex); C3(Carbam  | 1 | 1 |
| [R].GEcQAEGVLFFQGDR.[E]          | C3(Carbamidomethyl)            | 1 | 1 |
| [R].gEcQAEGVLFFQGDR.[E]          | N-Term(iTRAQ4plex); C3(Carbam  | 1 | 1 |
| [R].gEcQAEGVLFFQGDR.[E]          | N-Term(iTRAQ4plex); C3(Carbam  | 1 | 1 |
| [R].gEcQAEGVLFFQGDR.[E]          | N-Term(iTRAQ4plex); C3(Carbam  | 1 | 1 |
| [R].gEcQAEGVLFFQGDR.[E]          | N-Term(iTRAQ4plex); C3(Carbam  | 1 | 1 |
| [R].gEcQAEGVLFFQGDR.[E]          | N-Term(iTRAQ4plex); C3(Carbam  | 1 | 1 |
| [R].gEcQAEGVLFFQGDR.[E]          | N-Term(iTRAQ4plex); C3(Carbam  | 1 | 1 |
| [R].gEcQAEGVLFFQGDR.[E]          | N-Term(iTRAQ4plex); C3(Carbam  | 1 | 1 |
| [R].gEcQAEGVLFFQGDR.[E]          | N-Term(iTRAQ4plex); C3(Carbam  | 1 | 1 |
| [R].gEcQAEGVLFFQGDR.[E]          | N-Term(iTRAQ4plex); C3(Carbam  | 1 | 1 |
| [R].gEcQAEGVLFFQGDR.[E]          | N-Term(iTRAQ4plex); C3(Carbam  | 1 | 1 |
| [R].gEcQAEGVLFFQGDR.[E]          | N-Term(iTRAQ4plex); C3(Carbam  | 1 | 1 |
| [R].gEcQAEGVLFFQGDR.[E]          | N-Term(iTRAQ4plex); C3(Carbam  | 1 | 1 |
| [R].gEcQAEGVLFFQGDR.[E]          | N-Term(iTRAQ4plex); C3(Carbam  | 1 | 1 |
| [R].gEcQAEGVLFFQGDR.[E]          | N-Term(iTRAQ4plex); C3(Carbam  | 1 | 1 |
| [R].gEcQAEGVLFFQGDR.[E]          | N-Term(iTRAQ4plex); C3(Carbam  | 1 | 1 |
| [R].gEcQAEGVLFFQGDR.[E]          | N-Term(iTRAQ4plex); C3(Carbam  | 1 | 1 |
| [R].gEcQAEGVLFFQGDR.[E]          | N-Term(iTRAQ4plex); C3(Carbam  | 1 | 1 |
| [R].gEcQAEGVLFFQGDR.[E]          | N-Term(iTRAQ4plex); C3(Carbam  | 1 | 1 |
| [K].gGYTLVSGYPk.[R]              | N-Term(iTRAQ4plex); K11(iTRAQ  | 1 | 1 |
| [K].gGYTLVSGYPk.[R]              | N-Term(iTRAQ4plex); K11(iTRAQ  | 1 | 1 |
| [K].gGYTLVSGYPk.[R]              | N-Term(iTRAQ4plex); K11(iTRAQ  | 1 | 1 |
| [K].gGYTLVSGYPk.[R]              | N-Term(iTRAQ4plex); K11(iTRAQ  | 1 | 1 |
| [K].gGYTLVSGYPk.[R]              | N-Term(iTRAQ4plex); K11(iTRAQ  | 1 | 1 |
| [K].gGYTLVSGYPk.[R]              | N-Term(iTRAQ4plex); K11(iTRAQ  | 1 | 1 |
| [K].gGYTLVSGYPk.[R]              | N-Term(iTRAQ4plex); K11(iTRAQ  | 1 | 1 |
| [R].gEcQAEGVLFFQGDR.[E]          | N-Term(iTRAQ4plex); C3(Carbam  | 1 | 1 |
| [K].evGTPHGIILDSVDAAFicPGSSR.[L] | N-Term(iTRAQ4plex); C19(Carbar | 1 | 1 |

|                                    |                                |   |   |
|------------------------------------|--------------------------------|---|---|
| [K].ILQDEFPGIPSPLDAAVEcHR.[G]      | N-Term(iTRAQ4plex); C19(Carbar | 1 | 1 |
| [K].eVGTPHGIILDSVDAAFicPGSSR.[L]   | N-Term(iTRAQ4plex); C19(Carbar | 1 | 1 |
| [K].LLQDEFPGIPSPLDAAVEcHR.[G]      | C19(Carbamidomethyl)           | 1 | 1 |
| [K].eVGTPHGIILDSVDAAFicPGSSR.[L]   | N-Term(iTRAQ4plex); C19(Carbar | 1 | 1 |
| [K].LLQDEFPGIPSPLDAAVEcHR.[G]      | C19(Carbamidomethyl)           | 1 | 1 |
| [K].eVGTPHGIILDSVDAAFicPGSSR.[L]   | N-Term(iTRAQ4plex); C19(Carbar | 1 | 1 |
| [K].eVGTPHGIILDSVDAAFicPGSSR.[L]   | N-Term(iTRAQ4plex); C19(Carbar | 1 | 1 |
| [K].LLQDEFPGIPSPLDAAVEcHR.[G]      | C19(Carbamidomethyl)           | 1 | 1 |
| [K].eVGTPHGIILDSVDAAFicPGSSR.[L]   | N-Term(iTRAQ4plex); C19(Carbar | 1 | 1 |
| [K].eVGTPHGIILDSVDAAFicPGSSR.[L]   | N-Term(iTRAQ4plex); C19(Carbar | 1 | 1 |
| [K].eVGTPHGIILDSVDAAFicPGSSR.[L]   | N-Term(iTRAQ4plex); C19(Carbar | 1 | 1 |
| [K].eVGTPHGIILDSVDAAFicPGSSR.[L]   | N-Term(iTRAQ4plex); C19(Carbar | 1 | 1 |
| [K].eVGTPHGIILDSVDAAFicPGSSR.[L]   | N-Term(iTRAQ4plex); C19(Carbar | 1 | 1 |
| [K].eVGTPHGIILDSVDAAFicPGSSR.[L]   | N-Term(iTRAQ4plex); C19(Carbar | 1 | 1 |
| [K].eVGTPHGIILDSVDAAFicPGSSR.[L]   | N-Term(iTRAQ4plex); C19(Carbar | 1 | 1 |
| [K].eVGTPHGIILDSVDAAFicPGSSR.[L]   | N-Term(iTRAQ4plex); C19(Carbar | 1 | 1 |
| [K].eVGTPHGIILDSVDAAFicPGSSR.[L]   | N-Term(iTRAQ4plex); C19(Carbar | 1 | 1 |
| [K].eVGTPHGIILDSVDAAFicPGSSR.[L]   | N-Term(iTRAQ4plex); C19(Carbar | 1 | 1 |
| [K].eVGTPHGIILDSVDAAFicPGSSR.[L]   | N-Term(iTRAQ4plex); C19(Carbar | 1 | 1 |
| [K].eVGTPHGIILDSVDAAFicPGSSR.[L]   | N-Term(iTRAQ4plex); C19(Carbar | 1 | 1 |
| [R].eWFWDLATGTmk.[E]               | N-Term(iTRAQ4plex); M11(Oxida  | 1 | 1 |
| [K].ILQDEFPGIPSPLDAAVEcHR.[G]      | N-Term(iTRAQ4plex); C19(Carbar | 1 | 1 |
| [K].ILQDEFPGIPSPLDAAVEcHR.[G]      | N-Term(iTRAQ4plex); C19(Carbar | 1 | 1 |
| [K].ILQDEFPGIPSPLDAAVEcHR.[G]      | N-Term(iTRAQ4plex); C19(Carbar | 1 | 1 |
| [K].ILQDEFPGIPSPLDAAVEcHR.[G]      | N-Term(iTRAQ4plex); C19(Carbar | 1 | 1 |
| [K].ILQDEFPGIPSPLDAAVEcHR.[G]      | N-Term(iTRAQ4plex); C19(Carbar | 1 | 1 |
| [K].ILQDEFPGIPSPLDAAVEcHR.[G]      | N-Term(iTRAQ4plex); C19(Carbar | 1 | 1 |
| [K].ILQDEFPGIPSPLDAAVEcHR.[G]      | N-Term(iTRAQ4plex); C19(Carbar | 1 | 1 |
| [K].ILQDEFPGIPSPLDAAVEcHR.[G]      | N-Term(iTRAQ4plex); C19(Carbar | 1 | 1 |
| [K].ILQDEFPGIPSPLDAAVEcHR.[G]      | N-Term(iTRAQ4plex); C19(Carbar | 1 | 1 |
| [R].dGWHSWPIAHQWPQGPSAVDAAFSWE     | N-Term(iTRAQ4plex); K28(iTRAQ  | 1 | 1 |
| [K].ILQDEFPGIPSPLDAAVEcHR.[G]      | N-Term(iTRAQ4plex); C19(Carbar | 1 | 1 |
| [K].ILQDEFPGIPSPLDAAVEcHR.[G]      | N-Term(iTRAQ4plex); C19(Carbar | 1 | 1 |
| [K].eVGTPHGIILDSVDAAFicPGSSR.[L]   | N-Term(iTRAQ4plex); C19(Carbar | 1 | 1 |
| [R].eWFWDLATGTmk.[E]               | N-Term(iTRAQ4plex); M11(Oxida  | 1 | 1 |
| [K].eVGTPHGIILDSVDAAFicPGSSR.[L]   | N-Term(iTRAQ4plex); C19(Carbar | 1 | 1 |
| [K].eVGTPHGIILDSVDAAFicPGSSR.[L]   | N-Term(iTRAQ4plex); C19(Carbar | 1 | 1 |
| [R].qGHNSVFLik.[G]                 | N-Term(iTRAQ4plex); K10(iTRAQ  | 1 | 1 |
| [R].qGHNSVFLik.[G]                 | N-Term(iTRAQ4plex); K10(iTRAQ  | 1 | 1 |
| [K].EVGTPHGIILDSVDAAFicPGSSR.[L]   | C19(Carbamidomethyl)           | 1 | 1 |
| [K].eVGTPHGIILDSVDAAFicPGSSR.[L]   | N-Term(iTRAQ4plex); C19(Carbar | 1 | 1 |
| [K].eVGTPHGIILDSVDAAFicPGSSR.[L]   | N-Term(iTRAQ4plex); C19(Carbar | 1 | 1 |
| [K].eVGTPHGIILDSVDAAFicPGSSR.[L]   | N-Term(iTRAQ4plex); C19(Carbar | 1 | 1 |
| [K].sGAQATWTELPWPHEk.[V]           | N-Term(iTRAQ4plex); K16(iTRAQ  | 1 | 1 |
| [K].sGAQATWTELPWPHEk.[V]           | N-Term(iTRAQ4plex); K16(iTRAQ  | 1 | 1 |
| [K].sGAQATWTELPWPHEk.[V]           | N-Term(iTRAQ4plex); K16(iTRAQ  | 1 | 1 |
| [R].yYcFQGNQFLR.[F]                | N-Term(iTRAQ4plex); C3(Carbam  | 1 | 1 |
| [R].yYcFQGNQFLR.[F]                | N-Term(iTRAQ4plex); C3(Carbam  | 1 | 1 |
| [R].yYcFQGNQFLR.[F]                | N-Term(iTRAQ4plex); C3(Carbam  | 1 | 1 |
| [R].yYcFQGNQFLR.[F]                | N-Term(iTRAQ4plex); C3(Carbam  | 1 | 1 |
| [K].eVGTPHGIILDSVDAAFicPGSSR.[L]   | N-Term(iTRAQ4plex); C19(Carbar | 1 | 1 |
| [K].eVGTPHGIILDSVDAAFicPGSSR.[L]   | N-Term(iTRAQ4plex); C19(Carbar | 1 | 1 |
| [K].eVGTPHGIILDSVDAAFicPGSSR.[L]   | N-Term(iTRAQ4plex); C19(Carbar | 1 | 1 |
| [K].sLGPNScSANGPGLYLHGPNLYcYSDVEk. | N-Term(iTRAQ4plex); C7(Carbam  | 1 | 1 |
| [K].eVGTPHGIILDSVDAAFicPGSSR.[L]   | N-Term(iTRAQ4plex); C19(Carbar | 1 | 1 |
| [K].eVGTPHGIILDSVDAAFicPGSSR.[L]   | N-Term(iTRAQ4plex); C19(Carbar | 1 | 1 |

|                                  |                                |   |   |
|----------------------------------|--------------------------------|---|---|
| [K].eVGTPHGIILDSVDAAFicPGSSR.[L] | N-Term(iTRAQ4plex); C19(Carbar | 1 | 1 |
| [K].eVGTPHGIILDSVDAAFicPGSSR.[L] | N-Term(iTRAQ4plex); C19(Carbar | 1 | 1 |
| [K].eVGTPHGIILDSVDAAFicPGSSR.[L] | N-Term(iTRAQ4plex); C19(Carbar | 1 | 1 |
| [K].sGAQATWTELPWPHEk.[V]         | N-Term(iTRAQ4plex); K16(iTRAQ  | 1 | 1 |
| [K].sGAQATWTELPWPHEk.[V]         | N-Term(iTRAQ4plex); K16(iTRAQ  | 1 | 1 |
| [K].SGAQATWTELPWPHEk.[V]         | K16(iTRAQ4plex)                | 1 | 1 |
| [K].SGAQATWTELPWPHEk.[V]         | K16(iTRAQ4plex)                | 1 | 1 |
| [K].sGAQATWTELPWPHEk.[V]         | N-Term(iTRAQ4plex); K16(iTRAQ  | 1 | 1 |
| [K].SGAQATWTELPWPHEk.[V]         | K16(iTRAQ4plex)                | 1 | 1 |
| [K].sGAQATWTELPWPHEk.[V]         | N-Term(iTRAQ4plex); K16(iTRAQ  | 1 | 1 |
| [K].sGAQATWTELPWPHEk.[V]         | N-Term(iTRAQ4plex); K16(iTRAQ  | 1 | 1 |
| [K].SGAQATWTELPWPHEk.[V]         | K16(iTRAQ4plex)                | 1 | 1 |
| [K].sGAQATWTELPWPHEk.[V]         | N-Term(iTRAQ4plex); K16(iTRAQ  | 1 | 1 |
| [K].sGAQATWTELPWPHEk.[V]         | N-Term(iTRAQ4plex); K16(iTRAQ  | 1 | 1 |
| [K].sGAQATWTELPWPHEk.[V]         | N-Term(iTRAQ4plex); K16(iTRAQ  | 1 | 1 |
| [K].sGAQATWTELPWPHEk.[V]         | N-Term(iTRAQ4plex); K16(iTRAQ  | 1 | 1 |
| [R].EWFWDLATGTMk.[E]             | K12(iTRAQ4plex)                | 1 | 1 |
| [K].sGAQATWTELPWPHEk.[V]         | N-Term(iTRAQ4plex); K16(iTRAQ  | 1 | 1 |
| [K].sGAQATWTELPWPHEk.[V]         | N-Term(iTRAQ4plex); K16(iTRAQ  | 1 | 1 |
| [K].nFPSPVDAAFR.[Q]              | N-Term(iTRAQ4plex)             | 1 | 1 |
| [K].nFPSPVDAAFR.[Q]              | N-Term(iTRAQ4plex)             | 1 | 1 |
| [K].NFPSPVDAAFR.[Q]              |                                | 1 | 1 |
| [K].NFPSPVDAAFR.[Q]              |                                | 1 | 1 |
| [K].nFPSPVDAAFR.[Q]              | N-Term(iTRAQ4plex)             | 1 | 1 |
| [K].nFPSPVDAAFR.[Q]              | N-Term(iTRAQ4plex)             | 1 | 1 |
| [K].nFPSPVDAAFR.[Q]              | N-Term(iTRAQ4plex)             | 1 | 1 |
| [K].nFPSPVDAAFR.[Q]              | N-Term(iTRAQ4plex)             | 1 | 1 |
| [K].nFPSPVDAAFR.[Q]              | N-Term(iTRAQ4plex)             | 1 | 1 |
| [K].gGYTLVSGYPk.[R]              | N-Term(iTRAQ4plex); K11(iTRAQ  | 1 | 1 |
| [K].gGYTLVSGYPk.[R]              | N-Term(iTRAQ4plex); K11(iTRAQ  | 1 | 1 |
| [R].sWPAVGNcSSALR.[W]            | N-Term(iTRAQ4plex); C8(Carbam  | 1 | 1 |
| [K].vWVYPPEk.[K]                 | N-Term(iTRAQ4plex); K8(iTRAQ4  | 1 | 1 |
| [R].dGWHSWPIAHQWPQGPSAVDAAFSWE   | N-Term(iTRAQ4plex); K28(iTRAQ  | 1 | 1 |
| [R].dGWHSWPIAHQWPQGPSAVDAAFSWE   | N-Term(iTRAQ4plex); K28(iTRAQ  | 1 | 1 |
| [K].eVGTPHGIILDSVDAAFicPGSSR.[L] | N-Term(iTRAQ4plex); C19(Carbar | 1 | 1 |
| [K].ILQDEFPGIPSPLDAAVEcHR.[G]    | N-Term(iTRAQ4plex); C19(Carbar | 1 | 1 |
| [K].ILQDEFPGIPSPLDAAVEcHR.[G]    | N-Term(iTRAQ4plex); C19(Carbar | 1 | 1 |
| [K].LLQDEFPGIPSPLDAAVEcHR.[G]    | C19(Carbamidomethyl)           | 1 | 1 |
| [R].dGWHSWPIAHQWPQGPSAVDAAFSWE   | N-Term(iTRAQ4plex); K28(iTRAQ  | 1 | 1 |
| [K].LLQDEFPGIPSPLDAAVEcHR.[G]    | C19(Carbamidomethyl)           | 1 | 1 |
| [R].dGWHSWPIAHQWPQGPSAVDAAFSWE   | N-Term(iTRAQ4plex); K28(iTRAQ  | 1 | 1 |
| [K].LLQDEFPGIPSPLDAAVEcHR.[G]    | C19(Carbamidomethyl)           | 1 | 1 |
| [R].dGWHSWPIAHQWPQGPSAVDAAFSWE   | N-Term(iTRAQ4plex); K28(iTRAQ  | 1 | 1 |
| [K].ILQDEFPGIPSPLDAAVEcHR.[G]    | N-Term(iTRAQ4plex); C19(Carbar | 1 | 1 |
| [K].ILQDEFPGIPSPLDAAVEcHR.[G]    | N-Term(iTRAQ4plex); C19(Carbar | 1 | 1 |
| [K].ILQDEFPGIPSPLDAAVEcHR.[G]    | N-Term(iTRAQ4plex); C19(Carbar | 1 | 1 |
| [K].ILQDEFPGIPSPLDAAVEcHR.[G]    | N-Term(iTRAQ4plex); C19(Carbar | 1 | 1 |
| [K].ILQDEFPGIPSPLDAAVEcHR.[G]    | N-Term(iTRAQ4plex); C19(Carbar | 1 | 1 |
| [K].ILQDEFPGIPSPLDAAVEcHR.[G]    | N-Term(iTRAQ4plex); C19(Carbar | 1 | 1 |
| [K].ILQDEFPGIPSPLDAAVEcHR.[G]    | N-Term(iTRAQ4plex); C19(Carbar | 1 | 1 |
| [K].ILQDEFPGIPSPLDAAVEcHR.[G]    | N-Term(iTRAQ4plex); C19(Carbar | 1 | 1 |
| [K].eVGTPHGIILDSVDAAFicPGSSR.[L] | N-Term(iTRAQ4plex); C19(Carbar | 1 | 1 |

|                                      |                                          |   |   |
|--------------------------------------|------------------------------------------|---|---|
| [R].rLWWLDLKSGAQATWTELPWPHEk.[V]     | N-Term(iTRAQ4plex); K24(iTRAQ4plex)      | 1 | 1 |
| [K].eVGTPHGIILDSVDAAFicPGSSR.[L]     | N-Term(iTRAQ4plex); C19(Carbamidomethyl) | 1 | 1 |
| [R].RLWWLDLKSGAQATWTELPWPHEk.[V]     | K8(iTRAQ4plex); K24(iTRAQ4plex)          | 1 | 1 |
| [K].eVGTPHGIILDSVDAAFicPGSSR.[L]     | N-Term(iTRAQ4plex); C19(Carbamidomethyl) | 1 | 1 |
| [R].cSPHLVLSALTSDNHGATYAFSGTHYWR.[V] | N-Term(iTRAQ4plex); C1(Carbamidomethyl)  | 1 | 1 |
| [K].IYLVQGTQVYVFLtk.[G]              | N-Term(iTRAQ4plex); K15(iTRAQ4plex)      | 1 | 1 |
| [K].IYLVQGTQVYVFLtk.[G]              | N-Term(iTRAQ4plex); K15(iTRAQ4plex)      | 1 | 1 |
| [K].eVGTPHGIILDSVDAAFicPGSSR.[L]     | N-Term(iTRAQ4plex); C19(Carbamidomethyl) | 1 | 1 |
| [R].IWWLDLk.[S]                      | N-Term(iTRAQ4plex); K7(iTRAQ4plex)       | 1 | 1 |
| [K].ILQDEFPGIPSPLDAAVEcHR.[G]        | N-Term(iTRAQ4plex); C19(Carbamidomethyl) | 1 | 1 |
| [R].eWFWDLATGTmk.[E]                 | N-Term(iTRAQ4plex); M11(Oxidation)       | 1 | 1 |
| [R].IWWLDLk.[S]                      | N-Term(iTRAQ4plex); K7(iTRAQ4plex)       | 1 | 1 |
| [R].IWWLDLk.[S]                      | N-Term(iTRAQ4plex); K7(iTRAQ4plex)       | 1 | 1 |
| [R].dGWHSWPIAHQWPQGPSAVDAAFSWE       | N-Term(iTRAQ4plex); K28(iTRAQ4plex)      | 1 | 1 |
| [R].dGWHSWPIAHQWPQGPSAVDAAFSWE       | N-Term(iTRAQ4plex); K28(iTRAQ4plex)      | 1 | 1 |
| [R].eWFWDLATGTmk.[E]                 | N-Term(iTRAQ4plex); M11(Oxidation)       | 1 | 1 |
| [R].wkNFPSPVDAAFR.[Q]                | N-Term(iTRAQ4plex); K2(iTRAQ4plex)       | 1 | 1 |
| [R].wkNFPSPVDAAFR.[Q]                | N-Term(iTRAQ4plex); K2(iTRAQ4plex)       | 1 | 1 |
| [R].yYcFQGNQFLR.[F]                  | N-Term(iTRAQ4plex); C3(Carbamidomethyl)  | 1 | 1 |
| [K].vDGALcMEk.[S]                    | N-Term(iTRAQ4plex); C6(Carbamidomethyl)  | 1 | 1 |
| [R].wkNFPSPVDAAFR.[Q]                | N-Term(iTRAQ4plex); K2(iTRAQ4plex)       | 1 | 1 |
| [K].vDGALcMEk.[S]                    | N-Term(iTRAQ4plex); C6(Carbamidomethyl)  | 1 | 1 |
| [R].wkNFPSPVDAAFR.[Q]                | N-Term(iTRAQ4plex)                       | 1 | 1 |
| [R].wkNFPSPVDAAFR.[Q]                | K2(iTRAQ4plex)                           | 1 | 1 |
| [K].GGYTLVSGYPk.[R]                  | K11(iTRAQ4plex)                          | 1 | 1 |
| [K].ILQDEFPGIPSPLDAAVEcHR.[G]        | N-Term(iTRAQ4plex); C19(Carbamidomethyl) | 1 | 1 |
| [R].eWFWDLATGTmk.[E]                 | N-Term(iTRAQ4plex); K12(iTRAQ4plex)      | 1 | 1 |
| [R].eWFWDLATGTmk.[E]                 | N-Term(iTRAQ4plex); K12(iTRAQ4plex)      | 1 | 1 |
| [R].eWFWDLATGTmk.[E]                 | N-Term(iTRAQ4plex); K12(iTRAQ4plex)      | 1 | 1 |
| [R].gEcQAEGVLFQGD.R.[E]              | N-Term(iTRAQ4plex); C3(Carbamidomethyl)  | 1 | 1 |
| [K].ILQDEFPGIPSPLDAAVEcHR.[G]        | N-Term(iTRAQ4plex); C19(Carbamidomethyl) | 1 | 1 |
| [R].gEcQAEGVLFQGD.R.[E]              | N-Term(iTRAQ4plex); C3(Carbamidomethyl)  | 1 | 1 |
| [R].sWPAVGNcSSALR.[W]                | N-Term(iTRAQ4plex); C8(Carbamidomethyl)  | 1 | 1 |
| [K].NFPSPVDAAFR.[Q]                  |                                          | 1 | 1 |
| [R].gEcQAEGVLFQGD.R.[E]              | N-Term(iTRAQ4plex); C3(Carbamidomethyl)  | 1 | 1 |
| [K].vWVYPPEk.[K]                     | N-Term(iTRAQ4plex); K8(iTRAQ4plex)       | 1 | 1 |
| [R].gEcQAEGVLFQGD.R.[E]              | N-Term(iTRAQ4plex); C3(Carbamidomethyl)  | 1 | 1 |
| [K].vDGALcMEk.[S]                    | N-Term(iTRAQ4plex); C6(Carbamidomethyl)  | 1 | 1 |
| [K].eVGTPHGIILDSVDAAFicPGSSR.[L]     | N-Term(iTRAQ4plex); C19(Carbamidomethyl) | 1 | 1 |
| [R].dYFMPcPGR.[G]                    | N-Term(iTRAQ4plex); C6(Carbamidomethyl)  | 1 | 1 |
| [R].IWWLDLk.[S]                      | N-Term(iTRAQ4plex); K7(iTRAQ4plex)       | 1 | 1 |
| [K].VDGALcmEk.[S]                    | C6(Carbamidomethyl); M7(Oxidation)       | 1 | 1 |
| [R].qGHNSVFLik.[G]                   | N-Term(iTRAQ4plex); K10(iTRAQ4plex)      | 1 | 1 |
| [R].rLWWLDLk.[S]                     | N-Term(iTRAQ4plex); K8(iTRAQ4plex)       | 1 | 1 |
| [K].VDGALcMEk.[S]                    | C6(Carbamidomethyl); K9(iTRAQ4plex)      | 1 | 1 |
| [K].gGYTLVSGYPk.[R]                  | N-Term(iTRAQ4plex); K11(iTRAQ4plex)      | 1 | 1 |
| [R].IWWLDLk.[S]                      | N-Term(iTRAQ4plex); K7(iTRAQ4plex)       | 1 | 1 |
| [K].sGAQATWTELPWPHEk.[V]             | N-Term(iTRAQ4plex); K16(iTRAQ4plex)      | 1 | 1 |
| [R].yYcFQGNQFLR.[F]                  | N-Term(iTRAQ4plex); C3(Carbamidomethyl)  | 1 | 1 |
| [K].ILQDEFPGIPSPLDAAVEcHR.[G]        | N-Term(iTRAQ4plex); C19(Carbamidomethyl) | 1 | 1 |
| [K].gGYTLVSGYPk.[R]                  | N-Term(iTRAQ4plex); K11(iTRAQ4plex)      | 1 | 1 |
| [K].ILQDEFPGIPSPLDAAVEcHR.[G]        | N-Term(iTRAQ4plex); C19(Carbamidomethyl) | 1 | 1 |



|                                  |                                          |   |   |
|----------------------------------|------------------------------------------|---|---|
| [K].eVGTPHGIILDSVDAAFicPGSSR.[L] | N-Term(iTRAQ4plex); C19(Carbamidomethyl) | 1 | 1 |
| [R].dYFmPcPGR.[G]                | N-Term(iTRAQ4plex); M4(Oxidation)        | 1 | 1 |
| [R].rLWWLDLk.[S]                 | N-Term(iTRAQ4plex); K8(iTRAQ4plex)       | 1 | 1 |
| [K].vWVYPPEk.[K]                 | N-Term(iTRAQ4plex); K8(iTRAQ4plex)       | 1 | 1 |
| [R].dYFMPcPGR.[G]                | N-Term(iTRAQ4plex); C6(Carbamidomethyl)  | 1 | 1 |
| [K].vWVYPPEk.[K]                 | N-Term(iTRAQ4plex); K8(iTRAQ4plex)       | 1 | 1 |
| [K].vWVYPPEk.[K]                 | N-Term(iTRAQ4plex); K8(iTRAQ4plex)       | 1 | 1 |
| [R].gEcQAEGVLFFQGDR.[E]          | N-Term(iTRAQ4plex); C3(Carbamidomethyl)  | 1 | 1 |
| [R].gEcQAEGVLFFQGDR.[E]          | N-Term(iTRAQ4plex); C3(Carbamidomethyl)  | 1 | 1 |
| [K].nFPSPVDAAFR.[Q]              | N-Term(iTRAQ4plex)                       | 1 | 1 |
| [R].rLWWLDLk.[S]                 | N-Term(iTRAQ4plex); K8(iTRAQ4plex)       | 1 | 1 |
| [K].gGYTLVSGYPk.[R]              | N-Term(iTRAQ4plex); K11(iTRAQ4plex)      | 1 | 1 |
| [R].qGHNSVFLik.[G]               | N-Term(iTRAQ4plex); K10(iTRAQ4plex)      | 1 | 1 |
| [R].eWFWDLATGTmk.[E]             | N-Term(iTRAQ4plex); M11(Oxidation)       | 1 | 1 |
| [R].lWWLDLk.[S]                  | N-Term(iTRAQ4plex); K7(iTRAQ4plex)       | 1 | 1 |
| [K].gGYTLVSGYPk.[R]              | N-Term(iTRAQ4plex); K11(iTRAQ4plex)      | 1 | 1 |
| [R].QGHSVFLik.[G]                | K10(iTRAQ4plex)                          | 1 | 1 |
| [K].vWVYPPEk.[K]                 | N-Term(iTRAQ4plex); K8(iTRAQ4plex)       | 1 | 1 |
| [K].vWVYPPEk.[K]                 | N-Term(iTRAQ4plex); K8(iTRAQ4plex)       | 1 | 1 |
| [K].vWVYPPEk.[K]                 | N-Term(iTRAQ4plex); K8(iTRAQ4plex)       | 1 | 1 |
| [K].nFPSPVDAAFR.[Q]              | N-Term(iTRAQ4plex)                       | 1 | 1 |
| [K].eVGTPHGIILDSVDAAFicPGSSR.[L] | N-Term(iTRAQ4plex); C19(Carbamidomethyl) | 1 | 1 |
| [R].yYcFQGNQFLR.[F]              | N-Term(iTRAQ4plex); C3(Carbamidomethyl)  | 1 | 1 |
| [R].dYFMPcPGR.[G]                | N-Term(iTRAQ4plex); C6(Carbamidomethyl)  | 1 | 1 |
| [K].lLQDEFPGIPSPLDAAVEcHR.[G]    | N-Term(iTRAQ4plex); C19(Carbamidomethyl) | 1 | 1 |
| [R].eWFWDLATGTmk.[E]             | N-Term(iTRAQ4plex); M11(Oxidation)       | 1 | 1 |
| [K].vDGALcMEk.[S]                | N-Term(iTRAQ4plex); C6(Carbamidomethyl)  | 1 | 1 |
| [K].vWVYPPEk.[K]                 | N-Term(iTRAQ4plex); K8(iTRAQ4plex)       | 1 | 1 |
| [K].SGAQATWTELPWPHEk.[V]         | K16(iTRAQ4plex)                          | 1 | 1 |
| [R].gEcQAEGVLFFQGDR.[E]          | N-Term(iTRAQ4plex); C3(Carbamidomethyl)  | 1 | 1 |
| [K].gGYTLVSGYPk.[R]              | N-Term(iTRAQ4plex); K11(iTRAQ4plex)      | 1 | 1 |
| [K].lLQDEFPGIPSPLDAAVEcHR.[G]    | C19(Carbamidomethyl)                     | 1 | 1 |
| [K].vWVYPPEk.[K]                 | N-Term(iTRAQ4plex); K8(iTRAQ4plex)       | 1 | 1 |
| [R].dYFMPcPGR.[G]                | N-Term(iTRAQ4plex); C6(Carbamidomethyl)  | 1 | 1 |
| [R].yYcFQGNQFLR.[F]              | N-Term(iTRAQ4plex); C3(Carbamidomethyl)  | 1 | 1 |
| [R].YYcFQGNQFLR.[F]              | C3(Carbamidomethyl)                      | 1 | 1 |
| [K].NFPSPVDAAFR.[Q]              |                                          | 1 | 1 |
| [R].qGHNSVFLik.[G]               | N-Term(iTRAQ4plex); K10(iTRAQ4plex)      | 1 | 1 |
| [R].dYFMPcPGR.[G]                | N-Term(iTRAQ4plex); C6(Carbamidomethyl)  | 1 | 1 |
| [R].eWFWDLATGTmk.[E]             | N-Term(iTRAQ4plex); K12(iTRAQ4plex)      | 1 | 1 |
| [K].vWVYPPEk.[K]                 | N-Term(iTRAQ4plex); K8(iTRAQ4plex)       | 1 | 1 |
| [K].vWVYPPEk.[K]                 | N-Term(iTRAQ4plex); K8(iTRAQ4plex)       | 1 | 1 |
| [R].QGHSVFLik.[G]                | K10(iTRAQ4plex)                          | 1 | 1 |
| [K].NFPSPVDAAFR.[Q]              |                                          | 1 | 1 |
| [R].dYFMPcPGR.[G]                | N-Term(iTRAQ4plex); C6(Carbamidomethyl)  | 1 | 1 |
| [K].vWVYPPEk.[K]                 | N-Term(iTRAQ4plex); K8(iTRAQ4plex)       | 1 | 1 |
| [K].vWVYPPEkk.[E]                | N-Term(iTRAQ4plex); K8(iTRAQ4plex)       | 1 | 1 |
| [K].SGAQATWTELPWPHEk.[V]         | K16(iTRAQ4plex)                          | 1 | 1 |
| [K].vDGALcMEk.[S]                | N-Term(iTRAQ4plex); C6(Carbamidomethyl)  | 1 | 1 |
| [K].vDGALcmEk.[S]                | N-Term(iTRAQ4plex); C6(Carbamidomethyl)  | 1 | 1 |
| [K].NFPSPVDAAFR.[Q]              |                                          | 1 | 1 |
| [K].vWVYPPEkk.[E]                | N-Term(iTRAQ4plex); K8(iTRAQ4plex)       | 1 | 1 |

|                                  |                                |   |   |
|----------------------------------|--------------------------------|---|---|
| [R].yYcFQGNQFLR.[F]              | N-Term(iTRAQ4plex); C3(Carbam  | 1 | 1 |
| [K].gGYTLVSGYPk.[R]              | N-Term(iTRAQ4plex); K11(iTRAQ  | 1 | 1 |
| [R].qGHNSVFLIk.[G]               | N-Term(iTRAQ4plex); K10(iTRAQ  | 1 | 1 |
| [K].gGYTLVSGYPk.[R]              | N-Term(iTRAQ4plex); K11(iTRAQ  | 1 | 1 |
| [K].vDGALcmEk.[S]                | N-Term(iTRAQ4plex); C6(Carbam  | 1 | 1 |
| [K].gGYTLVSGYPk.[R]              | N-Term(iTRAQ4plex); K11(iTRAQ  | 1 | 1 |
| [K].vDGALcMEk.[S]                | N-Term(iTRAQ4plex); C6(Carbam  | 1 | 1 |
| [R].LWWLDLk.[S]                  | K7(iTRAQ4plex)                 | 1 | 1 |
| [R].rLWWLDLk.[S]                 | N-Term(iTRAQ4plex); K8(iTRAQ4  | 1 | 1 |
| [K].vWVYPPEk.[K]                 | N-Term(iTRAQ4plex); K8(iTRAQ4  | 1 | 1 |
| [K].EVGTPHGIILDSVDAAFicPGSSR.[L] | C19(Carbamidomethyl)           | 1 | 1 |
| [K].vWVYPPEk.[K]                 | N-Term(iTRAQ4plex); K8(iTRAQ4  | 1 | 1 |
| [R].dYFMPcPGR.[G]                | N-Term(iTRAQ4plex); C6(Carbam  | 1 | 1 |
| [K].vDGALcmEk.[S]                | N-Term(iTRAQ4plex); C6(Carbam  | 1 | 1 |
| [K].vWVYPPEk.[K]                 | N-Term(iTRAQ4plex); K8(iTRAQ4  | 1 | 1 |
| [R].YYcFQGNQFLR.[F]              | C3(Carbamidomethyl)            | 1 | 1 |
| [R].gEcQAEGVLFFQGDR.[E]          | N-Term(iTRAQ4plex); C3(Carbam  | 1 | 1 |
| [K].vDGALcMEk.[S]                | N-Term(iTRAQ4plex); C6(Carbam  | 1 | 1 |
| [R].rLWWLDLk.[S]                 | N-Term(iTRAQ4plex); K8(iTRAQ4  | 1 | 1 |
| [K].eVGTPHGIILDSVDAAFicPGSSR.[L] | N-Term(iTRAQ4plex); C19(Carbar | 1 | 1 |
| [K].LLQDEFPGIPSPDAAVECHR.[G]     | C19(Carbamidomethyl)           | 1 | 1 |
| [K].vDGALcmEk.[S]                | N-Term(iTRAQ4plex); C6(Carbam  | 1 | 1 |
| [R].gEVPPRYPR.[D]                | N-Term(iTRAQ4plex)             | 1 | 1 |
| [K].eVGTPHGIILDSVDAAFicPGSSR.[L] | N-Term(iTRAQ4plex); C19(Carbar | 1 | 1 |
| [R].dYFmPcPGR.[G]                | N-Term(iTRAQ4plex); M4(Oxidati | 1 | 1 |
| [R].LWWLDLk.[S]                  | K7(iTRAQ4plex)                 | 1 | 1 |
| [R].fDPVRGEVPPR.[Y]              | N-Term(iTRAQ4plex)             | 1 | 1 |
| [K].gGYTLVSGYPk.[R]              | N-Term(iTRAQ4plex); K11(iTRAQ  | 1 | 1 |
| [R].IWWLDLk.[S]                  | N-Term(iTRAQ4plex); K7(iTRAQ4  | 1 | 1 |
| [K].NFPSPVDAAFR.[Q]              |                                | 1 | 1 |
| [R].dYFMPcPGR.[G]                | N-Term(iTRAQ4plex); C6(Carbam  | 1 | 1 |
| [K].nFPSPVDAAFR.[Q]              | N-Term(iTRAQ4plex)             | 1 | 1 |
| [R].dYFmPcPGR.[G]                | N-Term(iTRAQ4plex); M4(Oxidati | 1 | 1 |
| [K].vWVYPPEk.[K]                 | N-Term(iTRAQ4plex); K8(iTRAQ4  | 1 | 1 |
| [K].vWVYPPEk.[K]                 | N-Term(iTRAQ4plex); K8(iTRAQ4  | 1 | 1 |
| [R].LWWLDLk.[S]                  | K7(iTRAQ4plex)                 | 1 | 1 |
| [K].nFPSPVDAAFR.[Q]              | N-Term(iTRAQ4plex)             | 1 | 1 |
| [R].dYFMPcPGR.[G]                | N-Term(iTRAQ4plex); C6(Carbam  | 1 | 1 |
| [R].eWFWDLATGTmk.[E]             | N-Term(iTRAQ4plex); M11(Oxida  | 1 | 1 |
| [K].vDGALcMEk.[S]                | N-Term(iTRAQ4plex); C6(Carbam  | 1 | 1 |
| [R].dYFMPcPGR.[G]                | N-Term(iTRAQ4plex); C6(Carbam  | 1 | 1 |
| [K].NFPSPVDAAFR.[Q]              |                                | 1 | 1 |
| [K].GGYTLVSGYPk.[R]              | K11(iTRAQ4plex)                | 1 | 1 |
| [K].EVGTPHGIILDSVDAAFicPGSSR.[L] | C19(Carbamidomethyl)           | 1 | 1 |
| [R].gEcQAEGVLFFQGDR.[E]          | N-Term(iTRAQ4plex); C3(Carbam  | 1 | 1 |
| [R].dYFmPcPGR.[G]                | N-Term(iTRAQ4plex); M4(Oxidati | 1 | 1 |
| [R].dYFMPcPGR.[G]                | N-Term(iTRAQ4plex); C6(Carbam  | 1 | 1 |
| [K].vDGALcMEk.[S]                | N-Term(iTRAQ4plex); C6(Carbam  | 1 | 1 |
| [R].gEcQAEGVLFFQGDR.[E]          | N-Term(iTRAQ4plex); C3(Carbam  | 1 | 1 |
| [R].QGHSVFLIk.[G]                | K10(iTRAQ4plex)                | 1 | 1 |
| [K].NFPSPVDAAFR.[Q]              |                                | 1 | 1 |
| [R].eWFWDLATGTmk.[E]             | N-Term(iTRAQ4plex); M11(Oxida  | 1 | 1 |

|                                  |                                |   |   |
|----------------------------------|--------------------------------|---|---|
| [K].vDGALcMEk.[S]                | N-Term(iTRAQ4plex); C6(Carbam  | 1 | 1 |
| [K].vDGALcmEk.[S]                | N-Term(iTRAQ4plex); C6(Carbam  | 1 | 1 |
| [K].IYLVQGTQVYVFLtk.[G]          | N-Term(iTRAQ4plex); K15(iTRAQ  | 1 | 1 |
| [K].eVGTPHGIILDSVDAAFicPGSSR.[L] | N-Term(iTRAQ4plex); C19(Carbar | 1 | 1 |
| [K].ILQDEFPGIPSPLDAAVEcHR.[G]    | N-Term(iTRAQ4plex); C19(Carbar | 1 | 1 |
| [R].dYFmPcPGR.[G]                | N-Term(iTRAQ4plex); M4(Oxidati | 1 | 1 |
| [K].nFPSPVDAAFR.[Q]              | N-Term(iTRAQ4plex)             | 1 | 1 |
| [K].sGAQATWTELPWPHEk.[V]         | N-Term(iTRAQ4plex); K16(iTRAQ  | 1 | 1 |
| [R].eWFWDLATGTMk.[E]             | N-Term(iTRAQ4plex); K12(iTRAQ  | 1 | 1 |
| [K].vDGALcmEk.[S]                | N-Term(iTRAQ4plex); C6(Carbam  | 1 | 1 |
| [R].qGHNSVFLIk.[G]               | N-Term(iTRAQ4plex); K10(iTRAQ  | 1 | 1 |
| [K].gGYTLVSGYPk.[R]              | N-Term(iTRAQ4plex); K11(iTRAQ  | 1 | 1 |
| [K].eVGTPHGIILDSVDAAFicPGSSR.[L] | N-Term(iTRAQ4plex); C19(Carbar | 1 | 1 |
| [R].qGHNSVFLIk.[G]               | N-Term(iTRAQ4plex); K10(iTRAQ  | 1 | 1 |
| [K].vWVYPPEk.[K]                 | N-Term(iTRAQ4plex); K8(iTRAQ4  | 1 | 1 |
| [K].nFPSPVDAAFR.[Q]              | N-Term(iTRAQ4plex)             | 1 | 1 |
| [R].dYFmPcPGR.[G]                | N-Term(iTRAQ4plex); M4(Oxidati | 1 | 1 |
| [R].YYcFQGNQFLR.[F]              | C3(Carbamidomethyl)            | 1 | 1 |
| [K].SGAQATWTELPWPHEk.[V]         | K16(iTRAQ4plex)                | 1 | 1 |
| [R].dYFmPcPGR.[G]                | N-Term(iTRAQ4plex); M4(Oxidati | 1 | 1 |
| [R].dYFmPcPGR.[G]                | N-Term(iTRAQ4plex); M4(Oxidati | 1 | 1 |
| [R].IMQcLPNPEDvk.[M]             | N-Term(iTRAQ4plex); C4(Carbam  | 1 | 1 |
| [K].cEWETPEGcEQVLTGkR.[L]        | N-Term(iTRAQ4plex); C1(Carbam  | 1 | 1 |
| [R].fSAIcQGDGTWSPR.[T]           | C5(Carbamidomethyl)            | 1 | 1 |
| [R].wTPYQGcEALccPEPk.[L]         | N-Term(iTRAQ4plex); C7(Carbam  | 1 | 1 |
| [R].wTPYQGcEALccPEPk.[L]         | N-Term(iTRAQ4plex); C7(Carbam  | 1 | 1 |
| [R].wTPYQGcEALccPEPk.[L]         | N-Term(iTRAQ4plex); C7(Carbam  | 1 | 1 |
| [R].wTPYQGcEALccPEPk.[L]         | N-Term(iTRAQ4plex); C7(Carbam  | 1 | 1 |
| [R].cHPGYkPTTDEPTTVIcQk.[N]      | C1(Carbamidomethyl); K6(iTRAC  | 1 | 1 |
| [K].eDVYVVGTVLR.[Y]              | N-Term(iTRAQ4plex)             | 1 | 1 |
| [K].eDVYVVGTVLR.[Y]              | N-Term(iTRAQ4plex)             | 1 | 1 |
| [K].eDVYVVGTVLR.[Y]              | N-Term(iTRAQ4plex)             | 1 | 1 |
| [R].wTPYQGcEALccPEPk.[L]         | N-Term(iTRAQ4plex); C7(Carbam  | 1 | 1 |
| [K].qSSYSFFk.[E]                 | N-Term(iTRAQ4plex); K9(iTRAQ4  | 1 | 1 |
| [K].qSSYSFFk.[E]                 | N-Term(iTRAQ4plex); K9(iTRAQ4  | 1 | 1 |
| [K].qSSYSFFk.[E]                 | N-Term(iTRAQ4plex); K9(iTRAQ4  | 1 | 1 |
| [R].fSAIcQGDGTWSPR.[T]           | N-Term(iTRAQ4plex); C5(Carbam  | 1 | 1 |
| [R].fSAIcQGDGTWSPR.[T]           | N-Term(iTRAQ4plex); C5(Carbam  | 1 | 1 |
| [R].fSAIcQGDGTWSPR.[T]           | N-Term(iTRAQ4plex); C5(Carbam  | 1 | 1 |
| [R].fSAIcQGDGTWSPR.[T]           | N-Term(iTRAQ4plex); C5(Carbam  | 1 | 1 |
| [R].kPDVSHGEMVSGFGPIYNYk.[D]     | N-Term(iTRAQ4plex); K1(iTRAQ4  | 1 | 1 |
| [R].GSSVIHcDADSk.[W]             | C7(Carbamidomethyl); K12(iTRA  | 1 | 1 |
| [R].fSAIcQGDGTWSPR.[T]           | N-Term(iTRAQ4plex); C5(Carbam  | 1 | 1 |
| [R].fSAIcQGDGTWSPR.[T]           | N-Term(iTRAQ4plex); C5(Carbam  | 1 | 1 |
| [R].kPDVSHGEMVSGFGPIYNYk.[D]     | N-Term(iTRAQ4plex); K1(iTRAQ4  | 1 | 1 |
| [R].kPDVSHGEMVSGFGPIYNYk.[D]     | N-Term(iTRAQ4plex); K1(iTRAQ4  | 1 | 1 |
| [R].IMQcLPNPEDvk.[M]             | N-Term(iTRAQ4plex); C4(Carbam  | 1 | 1 |
| [R].IMQcLPNPEDvk.[M]             | N-Term(iTRAQ4plex); C4(Carbam  | 1 | 1 |
| [R].kPDVSHGEMVSGFGPIYNYk.[D]     | N-Term(iTRAQ4plex); K1(iTRAQ4  | 1 | 1 |
| [K].gYILVQGak.[L]                | N-Term(iTRAQ4plex); K9(iTRAQ4  | 1 | 1 |
| [K].IScSYSHWSAPAPQck.[A]         | N-Term(iTRAQ4plex); C3(Carbam  | 1 | 1 |
| [R].gVGWSHPLPQcEIVk.[C]          | N-Term(iTRAQ4plex); C11(Carbar | 1 | 1 |

|                                   |                                |   |   |
|-----------------------------------|--------------------------------|---|---|
| [R].gVGWSHPLPQcEIVk.[C]           | N-Term(iTRAQ4plex); C11(Carbar | 1 | 1 |
| [R].gVGWSHPLPQcEIVk.[C]           | N-Term(iTRAQ4plex); C11(Carbar | 1 | 1 |
| [R].GVGWSHPLPQcEIVk.[C]           | C11(Carbamidomethyl); K15(iTR  | 1 | 1 |
| [R].lMQcLPNPEDVk.[M]              | N-Term(iTRAQ4plex); M2(Oxidati | 1 | 1 |
| [K].ISLEIEQLELQR.[D]              | N-Term(iTRAQ4plex)             | 1 | 1 |
| [K].ISLEIEQLELQR.[D]              | N-Term(iTRAQ4plex)             | 1 | 1 |
| [R].gSSVIHcDADSk.[W]              | N-Term(iTRAQ4plex); C7(Carbam  | 1 | 1 |
| [R].gSSVIHcDADSk.[W]              | N-Term(iTRAQ4plex); C7(Carbam  | 1 | 1 |
| [R].gSSVIHcDADSk.[W]              | N-Term(iTRAQ4plex); C7(Carbam  | 1 | 1 |
| [K].cEWETPEGcEQVLTGk.[R]          | N-Term(iTRAQ4plex); C1(Carbam  | 1 | 1 |
| [R].gSSVIHcDADSk.[W]              | N-Term(iTRAQ4plex); C7(Carbam  | 1 | 1 |
| [K].tDLSFGSQIEFScSEGFFLIGSTSR.[C] | N-Term(iTRAQ4plex); C13(Carbar | 1 | 1 |
| [R].tPScGDICNFPPk.[I]             | N-Term(iTRAQ4plex); C4(Carbam  | 1 | 1 |
| [R].tPScGDICNFPPk.[I]             | N-Term(iTRAQ4plex); C4(Carbam  | 1 | 1 |
| [R].tPScGDICNFPPk.[I]             | N-Term(iTRAQ4plex); C4(Carbam  | 1 | 1 |
| [R].tPScGDICNFPPk.[I]             | N-Term(iTRAQ4plex); C4(Carbam  | 1 | 1 |
| [R].tPScGDICNFPPk.[I]             | N-Term(iTRAQ4plex); C4(Carbam  | 1 | 1 |
| [R].tPScGDICNFPPk.[I]             | N-Term(iTRAQ4plex); C4(Carbam  | 1 | 1 |
| [R].tPScGDICNFPPk.[I]             | N-Term(iTRAQ4plex); C4(Carbam  | 1 | 1 |
| [R].tPScGDICNFPPk.[I]             | N-Term(iTRAQ4plex); C4(Carbam  | 1 | 1 |
| [R].tPScGDICNFPPk.[I]             | N-Term(iTRAQ4plex); C4(Carbam  | 1 | 1 |
| [K].eEIIYEcDk.[G]                 | N-Term(iTRAQ4plex); C7(Carbam  | 1 | 1 |
| [K].eEIIYEcDk.[G]                 | N-Term(iTRAQ4plex); C7(Carbam  | 1 | 1 |
| [K].eEIIYEcDk.[G]                 | N-Term(iTRAQ4plex); C7(Carbam  | 1 | 1 |
| [K].eEIIYEcDk.[G]                 | N-Term(iTRAQ4plex); C7(Carbam  | 1 | 1 |
| [K].eEIIYEcDk.[G]                 | N-Term(iTRAQ4plex); C7(Carbam  | 1 | 1 |
| [K].eEIIYEcDk.[G]                 | N-Term(iTRAQ4plex); C7(Carbam  | 1 | 1 |
| [R].lMQcLPNPEDVk.[M]              | N-Term(iTRAQ4plex); C4(Carbam  | 1 | 1 |
| [K].gYILVGQAk.[L]                 | N-Term(iTRAQ4plex); K9(iTRAQ4  | 1 | 1 |
| [R].tWYPEVPk.[C]                  | N-Term(iTRAQ4plex); K8(iTRAQ4  | 1 | 1 |
| [K].ckPPPDIR.[N]                  | N-Term(iTRAQ4plex); C1(Carbam  | 1 | 1 |
| [K].eEIIYEcDk.[G]                 | N-Term(iTRAQ4plex); C7(Carbam  | 1 | 1 |
| [K].eDVVVVGTVLR.[Y]               | N-Term(iTRAQ4plex)             | 1 | 1 |
| [K].mALEVYk.[L]                   | N-Term(iTRAQ4plex); K7(iTRAQ4  | 1 | 1 |
| [K].eEIIYEcDk.[G]                 | N-Term(iTRAQ4plex); C7(Carbam  | 1 | 1 |
| [R].cHPGYkPTTDEPTTVIcQk.[N]       | N-Term(iTRAQ4plex); C1(Carbam  | 1 | 1 |
| [R].gVGWSHPLPQcEIVk.[C]           | N-Term(iTRAQ4plex); C11(Carbar | 1 | 1 |
| [K].gYILVGQAk.[L]                 | N-Term(iTRAQ4plex); K9(iTRAQ4  | 1 | 1 |
| [R].tWYPEVPk.[C]                  | N-Term(iTRAQ4plex); K8(iTRAQ4  | 1 | 1 |
| [R].gSSVIHcDADSk.[W]              | N-Term(iTRAQ4plex); C7(Carbam  | 1 | 1 |
| [R].kPDVSHGEmVSGFGPIYNYk.[D]      | N-Term(iTRAQ4plex); K1(iTRAQ4  | 1 | 1 |
| [K].eDVVVVGTVLR.[Y]               | N-Term(iTRAQ4plex)             | 1 | 1 |
| [R].tPScGDICNFPPk.[I]             | N-Term(iTRAQ4plex); C4(Carbam  | 1 | 1 |
| [R].kPDVSHGEMVSGFGPIYNYk.[D]      | N-Term(iTRAQ4plex); K1(iTRAQ4  | 1 | 1 |
| [K].eDVVVVGTVLR.[Y]               | N-Term(iTRAQ4plex)             | 1 | 1 |
| [K].EDVVVGTVLR.[Y]                |                                | 1 | 1 |
| [K].iAHGHYk.[Q]                   | N-Term(iTRAQ4plex); K7(iTRAQ4  | 1 | 1 |
| [K].gYILVGQAk.[L]                 | N-Term(iTRAQ4plex); K9(iTRAQ4  | 1 | 1 |
| [R].tPScGDICNFPPk.[I]             | N-Term(iTRAQ4plex); C4(Carbam  | 1 | 1 |
| [K].mALEVYk.[L]                   | N-Term(iTRAQ4plex); K7(iTRAQ4  | 1 | 1 |
| [R].gSSVIHcDADSk.[W]              | N-Term(iTRAQ4plex); C7(Carbam  | 1 | 1 |
| [R].fkTGTTLk.[Y]                  | N-Term(iTRAQ4plex); K2(iTRAQ4  | 1 | 1 |

|                                    |                                |   |   |
|------------------------------------|--------------------------------|---|---|
| [R].gSSVIHcDADSk.[W]               | N-Term(iTRAQ4plex); C7(Carbam  | 1 | 1 |
| [K].gYILVGQAk.[L]                  | N-Term(iTRAQ4plex); K9(iTRAQ4  | 1 | 1 |
| [K].eDVYVVGTVLR.[Y]                | N-Term(iTRAQ4plex)             | 1 | 1 |
| [R].tWYPEVPk.[C]                   | N-Term(iTRAQ4plex); K8(iTRAQ4  | 1 | 1 |
| [K].gYILVGQAk.[L]                  | N-Term(iTRAQ4plex); K9(iTRAQ4  | 1 | 1 |
| [R].YRcHPGYkPTTDEPTTVIcQk.[N]      | C3(Carbamidomethyl); K8(iTRAC  | 1 | 1 |
| [R].GSSVIHcDADSk.[W]               | C7(Carbamidomethyl); K12(iTRA  | 1 | 1 |
| [K].yTcLPGYVR.[S]                  | N-Term(iTRAQ4plex); C3(Carbam  | 1 | 1 |
| [R].LMQcLPNPEDVk.[M]               | C4(Carbamidomethyl); K12(iTRA  | 1 | 1 |
| [R].tPScGDICNFPPk.[I]              | N-Term(iTRAQ4plex); C4(Carbam  | 1 | 1 |
| [K].iAHGHYk.[Q]                    | N-Term(iTRAQ4plex); K7(iTRAQ4  | 1 | 1 |
| [R].tPScGDICNFPPk.[I]              | N-Term(iTRAQ4plex); C4(Carbam  | 1 | 1 |
| [R].tPScGDICNFPPk.[I]              | N-Term(iTRAQ4plex); C4(Carbam  | 1 | 1 |
| [R].wTPYQGcEALccPEPk.[L]           | N-Term(iTRAQ4plex); C7(Carbam  | 1 | 1 |
| [R].tPScGDICNFPPk.[I]              | N-Term(iTRAQ4plex); C4(Carbam  | 1 | 1 |
| [K].gYILVGQAk.[L]                  | N-Term(iTRAQ4plex); K9(iTRAQ4  | 1 | 1 |
| [R].tPScGDICNFPPk.[I]              | N-Term(iTRAQ4plex); C4(Carbam  | 1 | 1 |
| [R].TWYPEVPk.[C]                   | K8(iTRAQ4plex)                 | 1 | 1 |
| [R].cHPGYkPTTDEPTTVIcQk.[N]        | N-Term(iTRAQ4plex); C1(Carbam  | 1 | 1 |
| [K].eEIYEcdk.[G]                   | N-Term(iTRAQ4plex); C7(Carbam  | 1 | 1 |
| [K].GYILVGQAk.[L]                  | K9(iTRAQ4plex)                 | 1 | 1 |
| [K].cEWETPEGcEQVLTGk.[R]           | C1(Carbamidomethyl); C9(Carba  | 1 | 1 |
| [K].yTcLPGYVR.[S]                  | N-Term(iTRAQ4plex); C3(Carbam  | 1 | 1 |
| [K].IScSYSHWSAPAPQck.[A]           | N-Term(iTRAQ4plex); C3(Carbam  | 1 | 1 |
| [R].gVGWSHPLPQcEIVk.[C]            | N-Term(iTRAQ4plex); C11(Carbar | 1 | 1 |
| [R].tPScGDICNFPPk.[I]              | N-Term(iTRAQ4plex); C4(Carbam  | 1 | 1 |
| [R].tWYPEVPk.[C]                   | N-Term(iTRAQ4plex); K8(iTRAQ4  | 1 | 1 |
| [R].tWYPEVPk.[C]                   | N-Term(iTRAQ4plex); K8(iTRAQ4  | 1 | 1 |
| [R].GVGWSHPLPQcEIVk.[C]            | C11(Carbamidomethyl); K15(iTR  | 1 | 1 |
| [R].tWYPEVPk.[C]                   | N-Term(iTRAQ4plex); K8(iTRAQ4  | 1 | 1 |
| [R].tPScGDICNFPPk.[I]              | N-Term(iTRAQ4plex); C4(Carbam  | 1 | 1 |
| [R].tWYPEVPk.[C]                   | N-Term(iTRAQ4plex); K8(iTRAQ4  | 1 | 1 |
| [R].gSSVIHcDADSk.[W]               | N-Term(iTRAQ4plex); C7(Carbam  | 1 | 1 |
| [R].gVGWSHPLPQcEIVk.[C]            | N-Term(iTRAQ4plex); C11(Carbar | 1 | 1 |
| [K].yTcLPGYVR.[S]                  | N-Term(iTRAQ4plex); C3(Carbam  | 1 | 1 |
| [R].tPScGDICNFPPk.[I]              | N-Term(iTRAQ4plex); C4(Carbam  | 1 | 1 |
| [R].tPScGDICNFPPk.[I]              | N-Term(iTRAQ4plex); C4(Carbam  | 1 | 1 |
| [K].eEIYEcdk.[G]                   | N-Term(iTRAQ4plex); C7(Carbam  | 1 | 1 |
| [R].cHPGYkPTTDEPTTVIcQk.[N]        | C1(Carbamidomethyl); K6(iTRAC  | 1 | 1 |
| [R].tPScGDICNFPPk.[I]              | N-Term(iTRAQ4plex); C4(Carbam  | 1 | 1 |
| [K].tSESGTPSSSTPQENTISGYSLLTck.[R] | N-Term(iTRAQ4plex); C25(Carbar | 1 | 1 |
| [R].iAYGTQGSSGYSLR.[L]             | N-Term(iTRAQ4plex)             | 1 | 1 |
| [R].iAYGTQGSSGYSLR.[L]             | N-Term(iTRAQ4plex)             | 1 | 1 |
| [K].ekGEIQNILQk.[V]                | N-Term(iTRAQ4plex); K2(iTRAQ4  | 1 | 1 |
| [K].ekGEIQNILQk.[V]                | N-Term(iTRAQ4plex); K2(iTRAQ4  | 1 | 1 |
| [K].ekGEIQNILQk.[V]                | N-Term(iTRAQ4plex); K2(iTRAQ4  | 1 | 1 |
| [R].LVGITSWEGEcAR.[R]              | C11(Carbamidomethyl)           | 1 | 1 |
| [R].IVGITSWEGEcAR.[R]              | N-Term(iTRAQ4plex); C11(Carbar | 1 | 1 |
| [R].vLTPDAFVcR.[T]                 | N-Term(iTRAQ4plex); C9(Carbam  | 1 | 1 |
| [K].vNIPLVTNEEcQk.[R]              | N-Term(iTRAQ4plex); C11(Carbar | 1 | 1 |
| [K].vAEYMDWILEk.[T]                | N-Term(iTRAQ4plex); K11(iTRAQ  | 1 | 1 |
| [K].vAEYMDWILEk.[T]                | N-Term(iTRAQ4plex); K11(iTRAQ  | 1 | 1 |

|                                   |                                |   |   |
|-----------------------------------|--------------------------------|---|---|
| [R].rEQPGVYTk.[V]                 | N-Term(iTRAQ4plex); K9(iTRAQ4  | 1 | 1 |
| [K].gDTSTIYTNcWVTGWGFSk.[E]       | N-Term(iTRAQ4plex); C10(Carbar | 1 | 1 |
| [K].dSVTGTLPk.[V]                 | N-Term(iTRAQ4plex); K9(iTRAQ4  | 1 | 1 |
| [K].gVNVcQETcTk.[M]               | N-Term(iTRAQ4plex); C5(Carbam  | 1 | 1 |
| [R].tLPEPcHsk.[I]                 | N-Term(iTRAQ4plex); C6(Carbam  | 1 | 1 |
| [R].gGDVASMYPNAQYcQMR.[C]         | N-Term(iTRAQ4plex); C15(Carbar | 1 | 1 |
| [R].IVGITSWGEGcAR.[R]             | N-Term(iTRAQ4plex); C11(Carbar | 1 | 1 |
| [R].IVGITSWGEGcAR.[R]             | N-Term(iTRAQ4plex); C11(Carbar | 1 | 1 |
| [K].qcGHQISAcHR.[D]               | N-Term(iTRAQ4plex); C2(Carbam  | 1 | 1 |
| [K].qcGHQISAcHR.[D]               | N-Term(iTRAQ4plex); C2(Carbam  | 1 | 1 |
| [K].eIIHQNYk.[V]                  | N-Term(iTRAQ4plex); K9(iTRAQ4  | 1 | 1 |
| [K].vSEGNHDIALIk.[L]              | N-Term(iTRAQ4plex); K12(iTRAQ  | 1 | 1 |
| [K].ekGEIQNILQk.[V]               | N-Term(iTRAQ4plex); K2(iTRAQ4  | 1 | 1 |
| [R].LSMDGSPTR.[I]                 |                                | 1 | 1 |
| [K].ekGEIQNILQk.[V]               | N-Term(iTRAQ4plex); K2(iTRAQ4  | 1 | 1 |
| [R].tGAVSGHSLk.[Q]                | N-Term(iTRAQ4plex); K10(iTRAQ  | 1 | 1 |
| [K].eIIHQNYk.[V]                  | N-Term(iTRAQ4plex); K9(iTRAQ4  | 1 | 1 |
| [K].gEIQNILQk.[V]                 | N-Term(iTRAQ4plex); K9(iTRAQ4  | 1 | 1 |
| [K].dTPFSQIk.[E]                  | N-Term(iTRAQ4plex); K8(iTRAQ4  | 1 | 1 |
| [R].TLPEPcHsk.[I]                 | C6(Carbamidomethyl); K9(iTRAC  | 1 | 1 |
| [K].ySPGGTPAIk.[V]                | N-Term(iTRAQ4plex); K11(iTRAQ  | 1 | 1 |
| [K].gDSGGPLVck.[HD]               | N-Term(iTRAQ4plex); C9(Carbam  | 1 | 2 |
| [K].ySPGGTPAIk.[V]                | N-Term(iTRAQ4plex); K11(iTRAQ  | 1 | 1 |
| [R].vLTPDAFVcR.[T]                | N-Term(iTRAQ4plex); C9(Carbam  | 1 | 1 |
| [K].vNIPLVTNEEcQk.[R]             | N-Term(iTRAQ4plex); C11(Carbar | 1 | 1 |
| [R].IVGITSWGEGcAR.[R]             | N-Term(iTRAQ4plex); C11(Carbar | 1 | 1 |
| [K].vSEGNHDIALIk.[L]              | N-Term(iTRAQ4plex); K12(iTRAQ  | 1 | 1 |
| [R].tLPEPcHsk.[I]                 | N-Term(iTRAQ4plex); C6(Carbam  | 1 | 1 |
| [R].LSMDGSPTR.[I]                 |                                | 1 | 1 |
| [K].vSSVEEcQk.[R]                 | N-Term(iTRAQ4plex); C7(Carbam  | 1 | 1 |
| [R].IVGITSWGEGcAR.[R]             | N-Term(iTRAQ4plex); C11(Carbar | 1 | 1 |
| [K].ekGEIQNILQk.[V]               | N-Term(iTRAQ4plex); K2(iTRAQ4  | 1 | 1 |
| [K].EkGEIQNILQk.[V]               | K2(iTRAQ4plex); K11(iTRAQ4ple  | 1 | 1 |
| [K].ekGEIQNILQk.[V]               | N-Term(iTRAQ4plex); K11(iTRAQ  | 1 | 1 |
| [R].TLPEPcHsk.[I]                 | C6(Carbamidomethyl); K9(iTRAC  | 1 | 1 |
| [R].eQPGVYTk.[V]                  | N-Term(iTRAQ4plex); K8(iTRAQ4  | 1 | 1 |
| [K].dTPFSQIk.[E]                  | N-Term(iTRAQ4plex); K8(iTRAQ4  | 1 | 1 |
| [R].IVGITSWGEGcAR.[R]             | N-Term(iTRAQ4plex); C11(Carbar | 1 | 1 |
| [K].dTPFSQIk.[E]                  | N-Term(iTRAQ4plex); K8(iTRAQ4  | 1 | 1 |
| [R].FAHYVVTSQVVNTANEAR.[E]        |                                | 1 | 1 |
| [R].gMADQDGLkPTIDkPSEDSPPLEmLGPR. | N-Term(iTRAQ4plex); K9(iTRAQ4  | 1 | 1 |
| [R].gMADQDGLkPTIDkPSEDSPPLEmLGPR. | N-Term(iTRAQ4plex); K9(iTRAQ4  | 1 | 1 |
| [R].gMADQDGLkPTIDkPSEDSPPLEmLGPR. | N-Term(iTRAQ4plex); K9(iTRAQ4  | 1 | 1 |
| [R].FAHYVVTSQVVNTANEAR.[E]        |                                | 1 | 1 |
| [R].gMADQDGLkPTIDkPSEDSPPLEmLGPR. | N-Term(iTRAQ4plex); K9(iTRAQ4  | 1 | 1 |
| [R].gMADQDGLkPTIDkPSEDSPPLEmLGPR. | N-Term(iTRAQ4plex); K9(iTRAQ4  | 1 | 1 |
| [R].gMADQDGLkPTIDkPSEDSPPLEmLGPR. | N-Term(iTRAQ4plex); K9(iTRAQ4  | 1 | 1 |
| [R].gMADQDGLkPTIDkPSEDSPPLEmLGPR. | N-Term(iTRAQ4plex); K9(iTRAQ4  | 1 | 1 |
| [R].gMADQDGLkPTIDkPSEDSPPLEmLGPR. | N-Term(iTRAQ4plex); K9(iTRAQ4  | 1 | 1 |
| [R].gMADQDGLkPTIDkPSEDSPPLEmLGPR. | N-Term(iTRAQ4plex); K9(iTRAQ4  | 1 | 1 |
| [R].gmADQDGLkPTIDkPSEDSPPLEmLGPR. | N-Term(iTRAQ4plex); M2(Oxidat  | 1 | 1 |
| [R].fAHYVVTSQVVNTANEAR.[E]        | N-Term(iTRAQ4plex)             | 1 | 1 |

|                                      |                                     |   |   |
|--------------------------------------|-------------------------------------|---|---|
| [R].fAHYVVTSQVVNTANEAR.[E]           | N-Term(iTRAQ4plex)                  | 1 | 1 |
| [R].gHMLENHVER.[L]                   | N-Term(iTRAQ4plex)                  | 1 | 1 |
| [R].eVAFDLEIPk.[T]                   | N-Term(iTRAQ4plex); K10(iTRAQ4plex) | 1 | 1 |
| [R].eVAFDLEIPk.[T]                   | N-Term(iTRAQ4plex); K10(iTRAQ4plex) | 1 | 1 |
| [R].qAVDTAVDGVFIR.[S]                | N-Term(iTRAQ4plex)                  | 1 | 1 |
| [R].qAVDTAVDGVFIR.[S]                | N-Term(iTRAQ4plex)                  | 1 | 1 |
| [R].QAVDTAVDGVFIR.[S]                |                                     | 1 | 1 |
| [R].gMADQDGLkPTIDkPSEDSPPLEMLGPR.[L] | N-Term(iTRAQ4plex); K9(iTRAQ4plex)  | 1 | 1 |
| [R].gMADQDGLkPTIDkPSEDSPPLEMLGPR.[L] | N-Term(iTRAQ4plex); K9(iTRAQ4plex)  | 1 | 1 |
| [R].eVAFDLEIPk.[T]                   | N-Term(iTRAQ4plex); K10(iTRAQ4plex) | 1 | 1 |
| [R].fAHYVVTSQVVNTANEAR.[E]           | N-Term(iTRAQ4plex)                  | 1 | 1 |
| [R].fAHYVVTSQVVNTANEAR.[E]           | N-Term(iTRAQ4plex)                  | 1 | 1 |
| [R].fAHYVVTSQVVNTANEAR.[E]           | N-Term(iTRAQ4plex)                  | 1 | 1 |
| [R].fAHYVVTSQVVNTANEAR.[E]           | N-Term(iTRAQ4plex)                  | 1 | 1 |
| [R].fAHYVVTSQVVNTANEAR.[E]           | N-Term(iTRAQ4plex)                  | 1 | 1 |
| [R].fAHYVVTSQVVNTANEAR.[E]           | N-Term(iTRAQ4plex)                  | 1 | 1 |
| [R].nHMQYEIVik.[V]                   | N-Term(iTRAQ4plex); K10(iTRAQ4plex) | 1 | 1 |
| [R].nHMQYEIVik.[V]                   | N-Term(iTRAQ4plex); K10(iTRAQ4plex) | 1 | 1 |
| [R].gHMLENHVER.[L]                   | N-Term(iTRAQ4plex)                  | 1 | 1 |
| [R].kAAISGENAGLVR.[A]                | N-Term(iTRAQ4plex); K1(iTRAQ4plex)  | 1 | 1 |
| [R].kAAISGENAGLVR.[A]                | N-Term(iTRAQ4plex); K1(iTRAQ4plex)  | 1 | 1 |
| [R].fAHYVVTSQVVNTANEAR.[E]           |                                     | 1 | 1 |
| [R].fAHYVVTSQVVNTANEAR.[E]           |                                     | 1 | 1 |
| [R].fAHYVVTSQVVNTANEAR.[E]           |                                     | 1 | 1 |
| [R].fAHYVVTSQVVNTANEAR.[E]           |                                     | 1 | 1 |
| [R].fAHYVVTSQVVNTANEAR.[E]           | N-Term(iTRAQ4plex)                  | 1 | 1 |
| [R].fAHYVVTSQVVNTANEAR.[E]           | N-Term(iTRAQ4plex)                  | 1 | 1 |
| [R].tMEQFTIHLTVNPQSk.[V]             | N-Term(iTRAQ4plex); K16(iTRAQ4plex) | 1 | 1 |
| [R].tMEQFTIHLTVNPQSk.[V]             | N-Term(iTRAQ4plex); K16(iTRAQ4plex) | 1 | 1 |
| [R].tMEQFTIHLTVNPQSk.[V]             | N-Term(iTRAQ4plex); K16(iTRAQ4plex) | 1 | 1 |
| [R].tMEQFTIHLTVNPQSk.[V]             | N-Term(iTRAQ4plex); K16(iTRAQ4plex) | 1 | 1 |
| [K].IDAQASFLPk.[E]                   | N-Term(iTRAQ4plex); K10(iTRAQ4plex) | 1 | 1 |
| [K].IDAQASFLPk.[E]                   | N-Term(iTRAQ4plex); K10(iTRAQ4plex) | 1 | 1 |
| [K].IDAQASFLPk.[E]                   | N-Term(iTRAQ4plex); K10(iTRAQ4plex) | 1 | 1 |
| [R].GHMLENHVER.[L]                   |                                     | 1 | 1 |
| [R].gHMLENHVER.[L]                   | N-Term(iTRAQ4plex)                  | 1 | 1 |
| [K].IDAQASFLPk.[E]                   | N-Term(iTRAQ4plex); K10(iTRAQ4plex) | 1 | 1 |
| [R].kAAISGENAGLVR.[A]                | N-Term(iTRAQ4plex)                  | 1 | 1 |
| [R].kAAISGENAGLVR.[A]                | K1(iTRAQ4plex)                      | 1 | 1 |
| [R].nHMQYEIVik.[V]                   | N-Term(iTRAQ4plex); K10(iTRAQ4plex) | 1 | 1 |
| [K].qLVHHEIDVDIFEPQGisk.[L]          | N-Term(iTRAQ4plex); K20(iTRAQ4plex) | 1 | 1 |
| [K].qLVHHEIDVDIFEPQGisk.[L]          | N-Term(iTRAQ4plex); K20(iTRAQ4plex) | 1 | 1 |
| [K].vTFQLTYEEVlk.[R]                 | N-Term(iTRAQ4plex); K12(iTRAQ4plex) | 1 | 1 |
| [K].vTFQLTYEEVlk.[R]                 | N-Term(iTRAQ4plex); K12(iTRAQ4plex) | 1 | 1 |
| [K].tAFISDFAVTADGNAFIGDIk.[D]        | N-Term(iTRAQ4plex); K21(iTRAQ4plex) | 1 | 1 |
| [K].gSLVQASEANLQAAQDFVR.[G]          | N-Term(iTRAQ4plex)                  | 1 | 1 |
| [K].gSLVQASEANLQAAQDFVR.[G]          | N-Term(iTRAQ4plex)                  | 1 | 1 |
| [K].gSLVQASEANLQAAQDFVR.[G]          | N-Term(iTRAQ4plex)                  | 1 | 1 |
| [K].gSLVQASEANLQAAQDFVR.[G]          | N-Term(iTRAQ4plex)                  | 1 | 1 |
| [K].qYYEGSEIIVAGR.[I]                | N-Term(iTRAQ4plex)                  | 1 | 1 |
| [K].qYYEGSEIIVAGR.[I]                | N-Term(iTRAQ4plex)                  | 1 | 1 |
| [K].qYYEGSEIIVAGR.[I]                | N-Term(iTRAQ4plex)                  | 1 | 1 |

|                                      |                                     |   |   |
|--------------------------------------|-------------------------------------|---|---|
| [K].qYYEGSEIVVAGR.[I]                | N-Term(iTRAQ4plex)                  | 1 | 1 |
| [R].gHMLENHVER.[L]                   | N-Term(iTRAQ4plex)                  | 1 | 1 |
| [R].gHMLENHVER.[L]                   | N-Term(iTRAQ4plex)                  | 1 | 1 |
| [K].tAFISDFAVTADGNAFIGDIk.[D]        | N-Term(iTRAQ4plex); K21(iTRAQ4plex) | 1 | 1 |
| [R].iADNkQSSfk.[A]                   | N-Term(iTRAQ4plex); K5(iTRAQ4plex)  | 1 | 1 |
| [K].nVVFVIDISGSMR.[G]                | N-Term(iTRAQ4plex)                  | 1 | 1 |
| [K].aDVQAHGEGQEFSITcLVDEEEMk.[K]     | N-Term(iTRAQ4plex); C16(Carbamoyl)  | 1 | 1 |
| [K].eLAAQTik.[K]                     | N-Term(iTRAQ4plex); K8(iTRAQ4plex)  | 1 | 1 |
| [R].gHmLENHVER.[L]                   | N-Term(iTRAQ4plex); M3(Oxidation)   | 1 | 1 |
| [R].gHmLENHVER.[L]                   | N-Term(iTRAQ4plex); M3(Oxidation)   | 1 | 1 |
| [R].gHmLENHVER.[L]                   | N-Term(iTRAQ4plex); M3(Oxidation)   | 1 | 1 |
| [R].gHmLENHVER.[L]                   | N-Term(iTRAQ4plex); M3(Oxidation)   | 1 | 1 |
| [R].gHmLENHVER.[L]                   | N-Term(iTRAQ4plex); M3(Oxidation)   | 1 | 1 |
| [K].AAISGENAGLVR.[A]                 |                                     | 1 | 1 |
| [R].gHmLENHVER.[L]                   | N-Term(iTRAQ4plex); M3(Oxidation)   | 1 | 1 |
| [R].sPGQHDGTYFGR.[L]                 | N-Term(iTRAQ4plex)                  | 1 | 1 |
| [R].gHMLENHVER.[L]                   | N-Term(iTRAQ4plex)                  | 1 | 1 |
| [R].gHmLENHVER.[L]                   | N-Term(iTRAQ4plex); M3(Oxidation)   | 1 | 1 |
| [R].gHMLENHVER.[L]                   | N-Term(iTRAQ4plex)                  | 1 | 1 |
| [R].nHMQYEIVik.[V]                   | N-Term(iTRAQ4plex); K10(iTRAQ4plex) | 1 | 1 |
| [R].nHMQYEIVik.[V]                   | N-Term(iTRAQ4plex); K10(iTRAQ4plex) | 1 | 1 |
| [R].nHMQYEIVik.[V]                   | N-Term(iTRAQ4plex); K10(iTRAQ4plex) | 1 | 1 |
| [R].nHMQYEIVik.[V]                   | N-Term(iTRAQ4plex); K10(iTRAQ4plex) | 1 | 1 |
| [K].tAFISDFAVTADGNAFIGDIk.[D]        | N-Term(iTRAQ4plex); K21(iTRAQ4plex) | 1 | 1 |
| [K].iLGDMQPGDYFDLVLFGR.[V]           | N-Term(iTRAQ4plex)                  | 1 | 1 |
| [K].qYYEGSEIVVAGR.[I]                | N-Term(iTRAQ4plex)                  | 1 | 1 |
| [R].tMEQFTIHLTVNPQSk.[V]             | N-Term(iTRAQ4plex); K16(iTRAQ4plex) | 1 | 1 |
| [R].lWAYLTIQELLak.[R]                | N-Term(iTRAQ4plex); K13(iTRAQ4plex) | 1 | 1 |
| [K].iLGDMQPGDYFDLVLFGR.[V]           | N-Term(iTRAQ4plex)                  | 1 | 1 |
| [R].qAVDTAVDGVFIR.[S]                | N-Term(iTRAQ4plex)                  | 1 | 1 |
| [R].GHMLENHVER.[L]                   |                                     | 1 | 1 |
| [R].nHmQYEIVik.[V]                   | N-Term(iTRAQ4plex); M3(Oxidation)   | 1 | 1 |
| [R].nHmQYEIVik.[V]                   | N-Term(iTRAQ4plex); M3(Oxidation)   | 1 | 1 |
| [R].gHmLENHVER.[L]                   | N-Term(iTRAQ4plex); M3(Oxidation)   | 1 | 1 |
| [K].aAISGENAGLVR.[A]                 | N-Term(iTRAQ4plex)                  | 1 | 1 |
| [K].aAISGENAGLVR.[A]                 | N-Term(iTRAQ4plex)                  | 1 | 1 |
| [K].GSLVQASEANLQAAQDFVR.[G]          |                                     | 1 | 1 |
| [K].qLVHHEIDVDIFEPQGisk.[L]          | N-Term(iTRAQ4plex); K20(iTRAQ4plex) | 1 | 1 |
| [K].IDAQASFLPk.[E]                   | N-Term(iTRAQ4plex); K10(iTRAQ4plex) | 1 | 1 |
| [K].vTFQLTYEEVLk.[R]                 | N-Term(iTRAQ4plex); K12(iTRAQ4plex) | 1 | 1 |
| [K].aAISGENAGLVR.[A]                 | N-Term(iTRAQ4plex)                  | 1 | 1 |
| [R].fAHYVVTSQVVNTANEAR.[E]           | N-Term(iTRAQ4plex)                  | 1 | 1 |
| [K].vTFQLTYEEVLk.[R]                 | N-Term(iTRAQ4plex); K12(iTRAQ4plex) | 1 | 1 |
| [R].QAVDTAVDGVFIR.[S]                |                                     | 1 | 1 |
| [R].tMEQFTIHLTVNPQSk.[V]             | N-Term(iTRAQ4plex); K16(iTRAQ4plex) | 1 | 1 |
| [K].gSLVQASEANLQAAQDFVR.[G]          | N-Term(iTRAQ4plex)                  | 1 | 1 |
| [R].tFVLSALQSPHTSSNTQR.[L]           | N-Term(iTRAQ4plex)                  | 1 | 1 |
| [R].gMADQDGLKPTIDkPSEDSPPLEMLGPR.[K] | N-Term(iTRAQ4plex); K9(iTRAQ4plex)  | 1 | 1 |
| [R].FAHYVVTSQVVNTANEAR.[E]           |                                     | 1 | 1 |
| [R].gMADQDGLKPTIDkPSEDSPPLEMLGPR.[K] | N-Term(iTRAQ4plex); K9(iTRAQ4plex)  | 1 | 1 |
| [R].GHmLENHVER.[L]                   | M3(Oxidation)                       | 1 | 1 |
| [K].aAISGENAGLVR.[A]                 | N-Term(iTRAQ4plex)                  | 1 | 1 |





|                                  |                                                          |   |   |
|----------------------------------|----------------------------------------------------------|---|---|
| [K].IQHLENELTHDIITk.[F]          | N-Term(iTRAQ4plex); K15(iTRAQ4plex)                      | 1 | 1 |
| [K].IQHLENELTHDIITk.[F]          | N-Term(iTRAQ4plex); K15(iTRAQ4plex)                      | 1 | 1 |
| [K].LYHSEFTVNFVGDTEEAk.[K]       | N-Term(iTRAQ4plex); K18(iTRAQ4plex)                      | 1 | 1 |
| [K].tDTSHHDQDHPTFNk.[I]          | N-Term(iTRAQ4plex); K15(iTRAQ4plex)                      | 1 | 1 |
| [K].tDTSHHDQDHPTFNk.[I]          | N-Term(iTRAQ4plex); K15(iTRAQ4plex)                      | 1 | 1 |
| [K].LYHSEFTVNFVGDTEEAk.[K]       | K18(iTRAQ4plex)                                          | 1 | 1 |
| [K].LYHSEFTVNFVGDTEEAk.[K]       | K18(iTRAQ4plex)                                          | 1 | 1 |
| [K].LYHSEFTVNFVGDTEEAk.[K]       | K18(iTRAQ4plex)                                          | 1 | 1 |
| [K].aVLTIDEk.[G]                 | N-Term(iTRAQ4plex); K8(iTRAQ4plex)                       | 1 | 1 |
| [K].tDTSHHDQDHPTFNk.[I]          | N-Term(iTRAQ4plex); K15(iTRAQ4plex)                      | 1 | 1 |
| [K].tDTSHHDQDHPTFNk.[I]          | N-Term(iTRAQ4plex); K15(iTRAQ4plex)                      | 1 | 1 |
| [R].LGMFNIQHck.[K]               | N-Term(iTRAQ4plex); C9(Carbamidomethyl); K10(iTRAQ4plex) | 1 | 1 |
| [R].LGMFNIQHck.[K]               | C9(Carbamidomethyl); K10(iTRAQ4plex)                     | 1 | 1 |
| [R].LGMFNIQHck.[K]               | C9(Carbamidomethyl); K10(iTRAQ4plex)                     | 1 | 1 |
| [K].ISITGTyDLk.[S]               | N-Term(iTRAQ4plex); K10(iTRAQ4plex)                      | 1 | 1 |
| [K].ISITGTyDLk.[S]               | N-Term(iTRAQ4plex); K10(iTRAQ4plex)                      | 1 | 1 |
| [K].gTEAAGAMFLEAIPMSIPPEVk.[F]   | N-Term(iTRAQ4plex); K22(iTRAQ4plex)                      | 1 | 1 |
| [R].tLNQPDSQLQLTTGNGLFLSEGLk.[L] | N-Term(iTRAQ4plex); K24(iTRAQ4plex)                      | 1 | 1 |
| [K].gTEAAGAMFLEAIPMSIPPEVk.[F]   | N-Term(iTRAQ4plex); M15(Oxidation)                       | 1 | 1 |
| [K].LYHSEFTVNFVGDTEEAk.[K]       | K18(iTRAQ4plex)                                          | 1 | 1 |
| [K].tDTSHHDQDHPTFNk.[I]          | N-Term(iTRAQ4plex); K15(iTRAQ4plex)                      | 1 | 1 |
| [K].tDTSHHDQDHPTFNk.[I]          | N-Term(iTRAQ4plex); K15(iTRAQ4plex)                      | 1 | 1 |
| [K].tDTSHHDQDHPTFNk.[I]          | N-Term(iTRAQ4plex); K15(iTRAQ4plex)                      | 1 | 1 |
| [K].tDTSHHDQDHPTFNk.[I]          | N-Term(iTRAQ4plex); K15(iTRAQ4plex)                      | 1 | 1 |
| [K].tDTSHHDQDHPTFNk.[I]          | N-Term(iTRAQ4plex); K15(iTRAQ4plex)                      | 1 | 1 |
| [K].tDTSHHDQDHPTFNk.[I]          | N-Term(iTRAQ4plex); K15(iTRAQ4plex)                      | 1 | 1 |
| [K].tDTSHHDQDHPTFNk.[I]          | N-Term(iTRAQ4plex); K15(iTRAQ4plex)                      | 1 | 1 |
| [K].tDTSHHDQDHPTFNk.[I]          | N-Term(iTRAQ4plex); K15(iTRAQ4plex)                      | 1 | 1 |
| [K].tDTSHHDQDHPTFNk.[I]          | N-Term(iTRAQ4plex); K15(iTRAQ4plex)                      | 1 | 1 |
| [K].tDTSHHDQDHPTFNk.[I]          | N-Term(iTRAQ4plex); K15(iTRAQ4plex)                      | 1 | 1 |
| [K].dTEEEDFHVDQVTTVv.[V]         | N-Term(iTRAQ4plex); K16(iTRAQ4plex)                      | 1 | 1 |
| [K].dTEEEDFHVDQVTTVv.[V]         | N-Term(iTRAQ4plex); K16(iTRAQ4plex)                      | 1 | 1 |
| [K].ISSWVLLMk.[Y]                | N-Term(iTRAQ4plex); K9(iTRAQ4plex)                       | 1 | 1 |
| [K].ISSWVLLMk.[Y]                | N-Term(iTRAQ4plex); K9(iTRAQ4plex)                       | 1 | 1 |
| [K].fnkPFVFLMIEQNTk.[S]          | N-Term(iTRAQ4plex); K3(iTRAQ4plex)                       | 1 | 1 |
| [K].fnkPFVFLMIEQNTk.[S]          | N-Term(iTRAQ4plex); K3(iTRAQ4plex)                       | 1 | 1 |
| [K].aVLTIDEk.[G]                 | N-Term(iTRAQ4plex); K8(iTRAQ4plex)                       | 1 | 1 |
| [K].dTEEEDFHVDQVTTVv.[V]         | N-Term(iTRAQ4plex); K16(iTRAQ4plex)                      | 1 | 1 |
| [K].dTEEEDFHVDQVTTVv.[V]         | N-Term(iTRAQ4plex); K16(iTRAQ4plex)                      | 1 | 1 |
| [K].dTEEEDFHVDQVTTVv.[V]         | N-Term(iTRAQ4plex); K16(iTRAQ4plex)                      | 1 | 1 |
| [K].dTEEEDFHVDQVTTVv.[V]         | N-Term(iTRAQ4plex); K16(iTRAQ4plex)                      | 1 | 1 |
| [K].dTEEEDFHVDQVTTVv.[V]         | N-Term(iTRAQ4plex); K16(iTRAQ4plex)                      | 1 | 1 |
| [K].dTEEEDFHVDQVTTVv.[V]         | N-Term(iTRAQ4plex); K16(iTRAQ4plex)                      | 1 | 1 |
| [K].LQHLENELTHDIITk.[F]          | K15(iTRAQ4plex)                                          | 1 | 1 |
| [K].svLGQLGITk.[V]               | N-Term(iTRAQ4plex); K10(iTRAQ4plex)                      | 1 | 1 |
| [K].svLGQLGITk.[V]               | N-Term(iTRAQ4plex); K10(iTRAQ4plex)                      | 1 | 1 |
| [K].LQHLENELTHDIITk.[F]          | K15(iTRAQ4plex)                                          | 1 | 1 |
| [K].LQHLENELTHDIITk.[F]          | K15(iTRAQ4plex)                                          | 1 | 1 |
| [K].LQHLENELTHDIITk.[F]          | K15(iTRAQ4plex)                                          | 1 | 1 |
| [K].aVLTIDEk.[G]                 | N-Term(iTRAQ4plex); K8(iTRAQ4plex)                       | 1 | 1 |
| [K].aVLTIDEk.[G]                 | N-Term(iTRAQ4plex); K8(iTRAQ4plex)                       | 1 | 1 |

|                                       |                                          |   |   |
|---------------------------------------|------------------------------------------|---|---|
| [R].dTVFALVNYIFFk.[G]                 | N-Term(iTRAQ4plex); K13(iTRAQ4plex)      | 1 | 1 |
| [K].eLDRDTVfALVNYIFFk.[G]             | N-Term(iTRAQ4plex); K17(iTRAQ4plex)      | 1 | 1 |
| [K].kLSSWVLLMk.[Y]                    | N-Term(iTRAQ4plex); K1(iTRAQ4plex)       | 1 | 1 |
| [K].kQINDYVEk.[G]                     | N-Term(iTRAQ4plex); K1(iTRAQ4plex)       | 1 | 1 |
| [K].iTPNLAEFafSLYR.[Q]                | N-Term(iTRAQ4plex)                       | 1 | 1 |
| [K].fNkPFVFLMIEQNTk.[S]               | N-Term(iTRAQ4plex); K3(iTRAQ4plex)       | 1 | 1 |
| [K].ISITGTyDLk.[S]                    | N-Term(iTRAQ4plex); K10(iTRAQ4plex)      | 1 | 1 |
| [K].sVLGQLGITk.[V]                    | N-Term(iTRAQ4plex); K10(iTRAQ4plex)      | 1 | 1 |
| [K].qINDYVEk.[G]                      | N-Term(iTRAQ4plex); K8(iTRAQ4plex)       | 1 | 1 |
| [K].IYHSEAFtvNFGDTEEAk.[K]            | N-Term(iTRAQ4plex); K18(iTRAQ4plex)      | 1 | 1 |
| [K].sVLGQLGITk.[V]                    | K10(iTRAQ4plex)                          | 1 | 1 |
| [K].dTEEDFHVDQVTTvk.[V]               | N-Term(iTRAQ4plex); K16(iTRAQ4plex)      | 1 | 1 |
| [K].tDTSHHDQDHPTFNk.[I]               | N-Term(iTRAQ4plex); K15(iTRAQ4plex)      | 1 | 1 |
| [R].IGmFNIQHck.[K]                    | N-Term(iTRAQ4plex); M3(Oxidation)        | 1 | 1 |
| [K].eLDRDTVfALVNYIFFk.[G]             | N-Term(iTRAQ4plex); K17(iTRAQ4plex)      | 1 | 1 |
| [R].IGmFNIQHck.[K]                    | N-Term(iTRAQ4plex); C9(Carbamidomethyl)  | 1 | 1 |
| [K].dTEEDFHVDQVTTvk.[V]               | N-Term(iTRAQ4plex); K16(iTRAQ4plex)      | 1 | 1 |
| [R].IGmFNIQHck.[K]                    | N-Term(iTRAQ4plex); M3(Oxidation)        | 1 | 1 |
| [K].IQHLENELTHDIITk.[F]               | N-Term(iTRAQ4plex); K15(iTRAQ4plex)      | 1 | 1 |
| [K].LQHLENELTHDIITk.[F]               | K15(iTRAQ4plex)                          | 1 | 1 |
| [K].ISSWVLLMk.[Y]                     | N-Term(iTRAQ4plex); K9(iTRAQ4plex)       | 1 | 1 |
| [K].dTEEDFHVDQVTTvk.[V]               | N-Term(iTRAQ4plex); K16(iTRAQ4plex)      | 1 | 1 |
| [K].rLGMFNIQHck.[K]                   | N-Term(iTRAQ4plex); C10(Carbamidomethyl) | 1 | 1 |
| [K].sVLGQLGITk.[V]                    | N-Term(iTRAQ4plex); K10(iTRAQ4plex)      | 1 | 1 |
| [K].gkWERPFEVk.[D]                    | N-Term(iTRAQ4plex); K2(iTRAQ4plex)       | 1 | 1 |
| [K].AVLTIDEk.[G]                      | K8(iTRAQ4plex)                           | 1 | 1 |
| [K].fNkPFVFLMIEQNTkSPLFMGkVVNPTQk.[I] | N-Term(iTRAQ4plex); K3(iTRAQ4plex)       | 1 | 1 |
| [K].TDTSHHDQDHPTFNk.[I]               | K15(iTRAQ4plex)                          | 1 | 1 |
| [K].gkWERPFEVk.[D]                    | N-Term(iTRAQ4plex); K2(iTRAQ4plex)       | 1 | 1 |
| [R].IGmFNIQHck.[K]                    | N-Term(iTRAQ4plex); M3(Oxidation)        | 1 | 1 |
| [R].IGmFNIQHck.[K]                    | N-Term(iTRAQ4plex); C9(Carbamidomethyl)  | 1 | 1 |
| [K].ISITGTyDLk.[S]                    | N-Term(iTRAQ4plex); K10(iTRAQ4plex)      | 1 | 1 |
| [K].kLSSWVLLMk.[Y]                    | K1(iTRAQ4plex); K10(iTRAQ4plex)          | 1 | 1 |
| [K].kLSSWVLLMk.[Y]                    | N-Term(iTRAQ4plex); K10(iTRAQ4plex)      | 1 | 1 |
| [K].IYHSEAFtvNFGDTEEAk.[K]            | N-Term(iTRAQ4plex); K18(iTRAQ4plex)      | 1 | 1 |
| [R].IGmFNIQHck.[K]                    | N-Term(iTRAQ4plex); C9(Carbamidomethyl)  | 1 | 1 |
| [K].IQHLENELTHDIITk.[F]               | N-Term(iTRAQ4plex); K15(iTRAQ4plex)      | 1 | 1 |
| [R].IGmFNIQHck.[K]                    | N-Term(iTRAQ4plex); M3(Oxidation)        | 1 | 1 |
| [K].LQHLENELTHDIITk.[F]               | K15(iTRAQ4plex)                          | 1 | 1 |
| [K].SPLFMGk.[V]                       | N-Term(iTRAQ4plex); K7(iTRAQ4plex)       | 1 | 1 |
| [K].rLGMFNIQHck.[K]                   | N-Term(iTRAQ4plex); C10(Carbamidomethyl) | 1 | 1 |
| [K].DTEEDFHVDQVTTvk.[V]               | K16(iTRAQ4plex)                          | 1 | 1 |
| [R].IGmFNIQHck.[K]                    | N-Term(iTRAQ4plex); C9(Carbamidomethyl)  | 1 | 1 |
| [K].tDTSHHDQDHPTFNk.[I]               | N-Term(iTRAQ4plex); K15(iTRAQ4plex)      | 1 | 1 |
| [R].IGmFNIQHck.[K]                    | N-Term(iTRAQ4plex); M3(Oxidation)        | 1 | 1 |
| [R].IGmFNIQHck.[K]                    | N-Term(iTRAQ4plex); C9(Carbamidomethyl)  | 1 | 1 |
| [R].IGmFNIQHck.[K]                    | N-Term(iTRAQ4plex); M3(Oxidation)        | 1 | 1 |
| [K].tDTSHHDQDHPTFNk.[I]               | N-Term(iTRAQ4plex); K15(iTRAQ4plex)      | 1 | 1 |
| [K].aVLTIDEk.[G]                      | N-Term(iTRAQ4plex); K8(iTRAQ4plex)       | 1 | 1 |
| [K].kLSSWVLLmk.[Y]                    | N-Term(iTRAQ4plex); K1(iTRAQ4plex)       | 1 | 1 |
| [K].tDTSHHDQDHPTFNk.[I]               | N-Term(iTRAQ4plex); K15(iTRAQ4plex)      | 1 | 1 |
| [R].SASLHLPk.[L]                      | N-Term(iTRAQ4plex); K8(iTRAQ4plex)       | 1 | 1 |

|                           |                                |   |   |
|---------------------------|--------------------------------|---|---|
| [K].QINDYVEk.[G]          | K8(iTRAQ4plex)                 | 1 | 1 |
| [K].qINDYVEk.[G]          | N-Term(iTRAQ4plex); K8(iTRAQ4  | 1 | 1 |
| [R].sASLHLPk.[L]          | N-Term(iTRAQ4plex); K8(iTRAQ4  | 1 | 1 |
| [R].LGmFNIQHck.[K]        | M3(Oxidation); C9(Carbamidom   | 1 | 1 |
| [K].sPLFMGk.[V]           | N-Term(iTRAQ4plex); K7(iTRAQ4  | 1 | 1 |
| [K].sPLFMGk.[V]           | N-Term(iTRAQ4plex); K7(iTRAQ4  | 1 | 1 |
| [K].TDTSHHDQDHPTFNk.[I]   | K15(iTRAQ4plex)                | 1 | 1 |
| [K].LYHSEAFVNFQDTEEAk.[K] | K18(iTRAQ4plex)                | 1 | 1 |
| [K].sPLFMGk.[V]           | N-Term(iTRAQ4plex); K7(iTRAQ4  | 1 | 1 |
| [R].IGmFNIQHck.[K]        | N-Term(iTRAQ4plex); C9(Carbam  | 1 | 1 |
| [K].wERPFEVk.[D]          | N-Term(iTRAQ4plex); K8(iTRAQ4  | 1 | 1 |
| [R].sASLHLPk.[L]          | N-Term(iTRAQ4plex); K8(iTRAQ4  | 1 | 1 |
| [K].DTEEEFDHVDQVTTvk.[V]  | K16(iTRAQ4plex)                | 1 | 1 |
| [K].TDTSHHDQDHPTFNk.[I]   | K15(iTRAQ4plex)                | 1 | 1 |
| [K].SVLGQLGITk.[V]        | K10(iTRAQ4plex)                | 1 | 1 |
| [K].aVLTIDEk.[G]          | N-Term(iTRAQ4plex); K8(iTRAQ4  | 1 | 1 |
| [R].IGmFNIQHck.[K]        | N-Term(iTRAQ4plex); M3(Oxidati | 1 | 1 |
| [K].wERPFEVk.[D]          | N-Term(iTRAQ4plex); K8(iTRAQ4  | 1 | 1 |
| [R].sASLHLPk.[L]          | N-Term(iTRAQ4plex); K8(iTRAQ4  | 1 | 1 |
| [K].SVLGQLGITk.[V]        | K10(iTRAQ4plex)                | 1 | 1 |
| [K].LYHSEAFVNFQDTEEAk.[K] | K18(iTRAQ4plex)                | 1 | 1 |
| [K].sPLFmGk.[V]           | N-Term(iTRAQ4plex); M5(Oxidati | 1 | 1 |
| [K].sPLFMGk.[V]           | N-Term(iTRAQ4plex); K7(iTRAQ4  | 1 | 1 |
| [K].TDTSHHDQDHPTFNk.[I]   | K15(iTRAQ4plex)                | 1 | 1 |
| [K].wERPFEVk.[D]          | N-Term(iTRAQ4plex); K8(iTRAQ4  | 1 | 1 |
| [K].sPLFMGk.[V]           | N-Term(iTRAQ4plex); K7(iTRAQ4  | 1 | 1 |
| [R].IGmFNIQHck.[K]        | N-Term(iTRAQ4plex); M3(Oxidati | 1 | 1 |
| [R].IGmFNIQHck.[K]        | N-Term(iTRAQ4plex); C9(Carbam  | 1 | 1 |
| [R].sASLHLPk.[L]          | N-Term(iTRAQ4plex); K8(iTRAQ4  | 1 | 1 |
| [R].IGmFNIQHck.[K]        | N-Term(iTRAQ4plex); M3(Oxidati | 1 | 1 |
| [K].wERPFEVk.[D]          | N-Term(iTRAQ4plex); K8(iTRAQ4  | 1 | 1 |
| [R].IGmFNIQHck.[K]        | N-Term(iTRAQ4plex); M3(Oxidati | 1 | 1 |
| [K].wERPFEVk.[D]          | N-Term(iTRAQ4plex); K8(iTRAQ4  | 1 | 1 |
| [K].IYHSEAFVNFQDTEEAk.[K] | N-Term(iTRAQ4plex); K18(iTRAQ  | 1 | 1 |
| [K].rLGmFNIQHck.[K]       | N-Term(iTRAQ4plex); C10(Carbar | 1 | 1 |
| [K].ISITGYDLk.[S]         | N-Term(iTRAQ4plex); K10(iTRAQ  | 1 | 1 |
| [R].sASLHLPk.[L]          | N-Term(iTRAQ4plex); K8(iTRAQ4  | 1 | 1 |
| [R].IGmFNIQHck.[K]        | N-Term(iTRAQ4plex); M3(Oxidati | 1 | 1 |
| [K].TDTSHHDQDHPTFNk.[I]   | K15(iTRAQ4plex)                | 1 | 1 |
| [K].aVLTIDEk.[G]          | N-Term(iTRAQ4plex); K8(iTRAQ4  | 1 | 1 |
| [K].ISITGYDLk.[S]         | N-Term(iTRAQ4plex); K10(iTRAQ  | 1 | 1 |
| [R].IGmFNIQHck.[K]        | N-Term(iTRAQ4plex); M3(Oxidati | 1 | 1 |
| [K].sPLFmGk.[V]           | N-Term(iTRAQ4plex); M5(Oxidati | 1 | 1 |
| [K].wERPFEVk.[D]          | N-Term(iTRAQ4plex); K8(iTRAQ4  | 1 | 1 |
| [R].IGmFNIQHck.[K]        | N-Term(iTRAQ4plex); M3(Oxidati | 1 | 1 |
| [K].IYHSEAFVNFQDTEEAk.[K] | N-Term(iTRAQ4plex); K18(iTRAQ  | 1 | 1 |
| [K].tDTSHHDQDHPTFNk.[I]   | N-Term(iTRAQ4plex); K15(iTRAQ  | 1 | 1 |
| [R].sASLHLPk.[L]          | N-Term(iTRAQ4plex); K8(iTRAQ4  | 1 | 1 |
| [R].IGmFNIQHck.[K]        | N-Term(iTRAQ4plex); M3(Oxidati | 1 | 1 |
| [K].LQHLENELTHDIITk.[F]   | K15(iTRAQ4plex)                | 1 | 1 |
| [K].TDTSHHDQDHPTFNk.[I]   | K15(iTRAQ4plex)                | 1 | 1 |
| [R].IGmFNIQHck.[K]        | N-Term(iTRAQ4plex); M3(Oxidati | 1 | 1 |

|                              |                                          |   |   |
|------------------------------|------------------------------------------|---|---|
| [K].IQHLENELTHDIITk.[F]      | N-Term(iTRAQ4plex); K15(iTRAQ4plex)      | 1 | 1 |
| [R].eTAASLLQAGYk.[G]         | N-Term(iTRAQ4plex); K12(iTRAQ4plex)      | 1 | 1 |
| [R].eTAASLLQAGYk.[G]         | N-Term(iTRAQ4plex); K12(iTRAQ4plex)      | 1 | 1 |
| [R].eTAASLLQAGYk.[G]         | N-Term(iTRAQ4plex); K12(iTRAQ4plex)      | 1 | 1 |
| [R].rQEcSIPVcGQDQVTAMTPR.[S] | N-Term(iTRAQ4plex); C4(Carbamidomethyl)  | 1 | 1 |
| [R].rQEcSIPVcGQDQVTAMTPR.[S] | N-Term(iTRAQ4plex); C4(Carbamidomethyl)  | 1 | 1 |
| [R].rQEcSIPVcGQDQVTAMTPR.[S] | N-Term(iTRAQ4plex); C4(Carbamidomethyl)  | 1 | 1 |
| [R].iTDMFcgAGYkPDEGk.[R]     | N-Term(iTRAQ4plex); C7(Carbamidomethyl)  | 1 | 1 |
| [R].iTDMFcgAGYkPDEGk.[R]     | N-Term(iTRAQ4plex); C7(Carbamidomethyl)  | 1 | 1 |
| [R].iTDMFcgAGYkPDEGk.[R]     | N-Term(iTRAQ4plex); C7(Carbamidomethyl)  | 1 | 1 |
| [R].rQEcSIPVcGQDQVTAMTPR.[S] | N-Term(iTRAQ4plex); C4(Carbamidomethyl)  | 1 | 1 |
| [R].sGIEcQLWR.[S]            | N-Term(iTRAQ4plex); C5(Carbamidomethyl)  | 1 | 1 |
| [R].sGIEcQLWR.[S]            | N-Term(iTRAQ4plex); C5(Carbamidomethyl)  | 1 | 1 |
| [R].rQEcSIPVcGQDQVTAMTPR.[S] | N-Term(iTRAQ4plex); C4(Carbamidomethyl)  | 1 | 1 |
| [R].tATSEYQTFNPR.[T]         | N-Term(iTRAQ4plex)                       | 1 | 1 |
| [R].tATSEYQTFNPR.[T]         | N-Term(iTRAQ4plex)                       | 1 | 1 |
| [K].IAAcLEGncAEGLGTNYR.[G]   | N-Term(iTRAQ4plex); C4(Carbamidomethyl)  | 1 | 1 |
| [K].IAAcLEGncAEGLGTNYR.[G]   | N-Term(iTRAQ4plex); C4(Carbamidomethyl)  | 1 | 1 |
| [K].IAAcLEGncAEGLGTNYR.[G]   | N-Term(iTRAQ4plex); C4(Carbamidomethyl)  | 1 | 1 |
| [K].IAAcLEGncAEGLGTNYR.[G]   | N-Term(iTRAQ4plex); C4(Carbamidomethyl)  | 1 | 1 |
| [R].TATSEYQTFNPR.[T]         |                                          | 1 | 1 |
| [R].eLLESYIDGR.[I]           | N-Term(iTRAQ4plex)                       | 1 | 1 |
| [R].eLLESYIDGR.[I]           | N-Term(iTRAQ4plex)                       | 1 | 1 |
| [R].nPDSSTTGPWcYTTDPTVR.[R]  | N-Term(iTRAQ4plex); C11(Carbamidomethyl) | 1 | 1 |
| [R].sEGSSVNLSPPLEQcVPDR.[G]  | N-Term(iTRAQ4plex); C15(Carbamidomethyl) | 1 | 1 |
| [R].sEGSSVNLSPPLEQcVPDR.[G]  | N-Term(iTRAQ4plex); C15(Carbamidomethyl) | 1 | 1 |
| [K].yGFYTHVFR.[L]            | N-Term(iTRAQ4plex)                       | 1 | 1 |
| [R].rQEcSIPVcGQDQVTAMTPR.[S] | N-Term(iTRAQ4plex); C4(Carbamidomethyl)  | 1 | 1 |
| [K].hQDFNSAVQLVENFcR.[N]     | N-Term(iTRAQ4plex); C15(Carbamidomethyl) | 1 | 1 |
| [R].vTGWGNLk.[E]             | N-Term(iTRAQ4plex); K8(iTRAQ4plex)       | 1 | 1 |
| [K].kPVAfSDYIHPVcLPDR.[E]    | N-Term(iTRAQ4plex); K1(iTRAQ4plex)       | 1 | 1 |
| [K].kPVAfSDYIHPVcLPDR.[E]    | N-Term(iTRAQ4plex); K1(iTRAQ4plex)       | 1 | 1 |
| [K].kPVAfSDYIHPVcLPDR.[E]    | N-Term(iTRAQ4plex); K1(iTRAQ4plex)       | 1 | 1 |
| [K].kPVAfSDYIHPVcLPDR.[E]    | N-Term(iTRAQ4plex); K1(iTRAQ4plex)       | 1 | 1 |
| [K].kPVAfSDYIHPVcLPDR.[E]    | N-Term(iTRAQ4plex); K1(iTRAQ4plex)       | 1 | 1 |
| [K].hQDFNSAVQLVENFcR.[N]     | N-Term(iTRAQ4plex); C15(Carbamidomethyl) | 1 | 1 |
| [K].sPQELLcGASLISDR.[W]      | N-Term(iTRAQ4plex); C7(Carbamidomethyl)  | 1 | 1 |
| [K].sPQELLcGASLISDR.[W]      | N-Term(iTRAQ4plex); C7(Carbamidomethyl)  | 1 | 1 |
| [K].hQDFNSAVQLVENFcR.[N]     | N-Term(iTRAQ4plex); C15(Carbamidomethyl) | 1 | 1 |
| [K].HqDFNSAVQLVENFcR.[N]     | C15(Carbamidomethyl)                     | 1 | 1 |
| [K].hQDFNSAVQLVENFcR.[N]     | N-Term(iTRAQ4plex); C15(Carbamidomethyl) | 1 | 1 |
| [K].sPQELLcGASLISDR.[W]      | N-Term(iTRAQ4plex); C7(Carbamidomethyl)  | 1 | 1 |
| [K].hQDFNSAVQLVENFcR.[N]     | N-Term(iTRAQ4plex); C15(Carbamidomethyl) | 1 | 1 |
| [R].kSPQELLcGASLISDR.[W]     | N-Term(iTRAQ4plex); K1(iTRAQ4plex)       | 1 | 1 |
| [R].kSPQELLcGASLISDR.[W]     | N-Term(iTRAQ4plex); K1(iTRAQ4plex)       | 1 | 1 |
| [R].kSPQELLcGASLISDR.[W]     | N-Term(iTRAQ4plex); K1(iTRAQ4plex)       | 1 | 1 |
| [R].kSPQELLcGASLISDR.[W]     | N-Term(iTRAQ4plex); K1(iTRAQ4plex)       | 1 | 1 |
| [R].kSPQELLcGASLISDR.[W]     | N-Term(iTRAQ4plex); K1(iTRAQ4plex)       | 1 | 1 |
| [R].kSPQELLcGASLISDR.[W]     | N-Term(iTRAQ4plex); K1(iTRAQ4plex)       | 1 | 1 |
| [R].kSPQELLcGASLISDR.[W]     | N-Term(iTRAQ4plex); C8(Carbamidomethyl)  | 1 | 1 |
| [R].kSPQELLcGASLISDR.[W]     | N-Term(iTRAQ4plex); C8(Carbamidomethyl)  | 1 | 1 |
| [R].kSPQELLcGASLISDR.[W]     | K1(iTRAQ4plex); C8(Carbamidomethyl)      | 1 | 1 |

|                              |                                          |   |   |
|------------------------------|------------------------------------------|---|---|
| [R].kSPQELLcGASLISDR.[W]     | K1(iTRAQ4plex); C8(Carbamidomethyl)      | 1 | 1 |
| [R].tATSEYQTFNPR.[T]         | N-Term(iTRAQ4plex)                       | 1 | 1 |
| [R].tATSEYQTFNPR.[T]         | N-Term(iTRAQ4plex)                       | 1 | 1 |
| [R].tFGSGEADcGLRPLFEK.[K]    | N-Term(iTRAQ4plex); C9(Carbamidomethyl)  | 1 | 1 |
| [R].tFGSGEADcGLRPLFEK.[K]    | N-Term(iTRAQ4plex); C9(Carbamidomethyl)  | 1 | 1 |
| [R].TFGSGEADcGLRPLFEK.[K]    | C9(Carbamidomethyl); K17(iTRAQ4plex)     | 1 | 1 |
| [R].tFGSGEADcGLRPLFEK.[K]    | N-Term(iTRAQ4plex); C9(Carbamidomethyl)  | 1 | 1 |
| [R].tFGSGEADcGLRPLFEK.[K]    | N-Term(iTRAQ4plex); C9(Carbamidomethyl)  | 1 | 1 |
| [R].iTDNMFcAGYkPDEGkR.[G]    | N-Term(iTRAQ4plex); C7(Carbamidomethyl)  | 1 | 1 |
| [K].gQPSVLQVVNLPIVERPVck.[D] | N-Term(iTRAQ4plex); C19(Carbamidomethyl) | 1 | 1 |
| [K].gQPSVLQVVNLPIVERPVck.[D] | N-Term(iTRAQ4plex); C19(Carbamidomethyl) | 1 | 1 |
| [K].gQPSVLQVVNLPIVERPVck.[D] | N-Term(iTRAQ4plex); C19(Carbamidomethyl) | 1 | 1 |
| [R].gDAcEGDSGGPFVmk.[S]      | N-Term(iTRAQ4plex); C4(Carbamidomethyl)  | 1 | 1 |
| [R].gDAcEGDSGGPFVmk.[S]      | N-Term(iTRAQ4plex); C4(Carbamidomethyl)  | 1 | 1 |
| [R].gDAcEGDSGGPFVmk.[S]      | N-Term(iTRAQ4plex); C4(Carbamidomethyl)  | 1 | 1 |
| [R].GDAcEGDSGGPFVmk.[S]      | C4(Carbamidomethyl); K15(iTRAQ4plex)     | 1 | 1 |
| [R].wYQmGIVSWGEGcDR.[D]      | N-Term(iTRAQ4plex); M4(Oxidation)        | 1 | 1 |
| [R].sEGSSVNLSPPLEQcVPDR.[G]  | N-Term(iTRAQ4plex); C15(Carbamidomethyl) | 1 | 1 |
| [R].SEGSSVNLSPPLEQcVPDR.[G]  | C15(Carbamidomethyl)                     | 1 | 1 |
| [R].ELLESYIDGR.[I]           |                                          | 1 | 1 |
| [K].hQDFNSAVQLVENFcR.[N]     | N-Term(iTRAQ4plex); C15(Carbamidomethyl) | 1 | 1 |
| [R].SEGSSVNLSPPLEQcVPDR.[G]  | C15(Carbamidomethyl)                     | 1 | 1 |
| [R].sEGSSVNLSPPLEQcVPDR.[G]  | N-Term(iTRAQ4plex); C15(Carbamidomethyl) | 1 | 1 |
| [R].sEGSSVNLSPPLEQcVPDR.[G]  | N-Term(iTRAQ4plex); C15(Carbamidomethyl) | 1 | 1 |
| [R].SEGSSVNLSPPLEQcVPDR.[G]  | C15(Carbamidomethyl)                     | 1 | 1 |
| [R].wYQMGIIVSWGEGcDR.[D]     | N-Term(iTRAQ4plex); C13(Carbamidomethyl) | 1 | 1 |
| [R].wYQMGIIVSWGEGcDR.[D]     | N-Term(iTRAQ4plex); C13(Carbamidomethyl) | 1 | 1 |
| [R].wYQMGIIVSWGEGcDR.[D]     | N-Term(iTRAQ4plex); C13(Carbamidomethyl) | 1 | 1 |
| [R].gDAcEGDSGGPFVmk.[S]      | N-Term(iTRAQ4plex); C4(Carbamidomethyl)  | 1 | 1 |
| [K].rGDAcEGDSGGPFVmk.[S]     | N-Term(iTRAQ4plex); C5(Carbamidomethyl)  | 1 | 1 |
| [K].rGDAcEGDSGGPFVmk.[S]     | N-Term(iTRAQ4plex); C5(Carbamidomethyl)  | 1 | 1 |
| [R].wVLTAAHcLLYPPWdk.[N]     | N-Term(iTRAQ4plex); C8(Carbamidomethyl)  | 1 | 1 |
| [R].gDAcEGDSGGPFVmk.[S]      | N-Term(iTRAQ4plex); C4(Carbamidomethyl)  | 1 | 1 |
| [R].wVLTAAHcLLYPPWdk.[N]     | N-Term(iTRAQ4plex); C8(Carbamidomethyl)  | 1 | 1 |
| [R].iVEGSDAEIGMSPWQVMLFR.[K] | N-Term(iTRAQ4plex)                       | 1 | 1 |
| [R].ETAASLLQAGYk.[G]         | K12(iTRAQ4plex)                          | 1 | 1 |
| [K].kPVAFSYIHPVcLPDR.[E]     | N-Term(iTRAQ4plex); K1(iTRAQ4plex)       | 1 | 1 |
| [R].IAVTTHGLPcLAWASQAk.[A]   | N-Term(iTRAQ4plex); C10(Carbamidomethyl) | 1 | 1 |
| [R].IAVTTHGLPcLAWASQAk.[A]   | N-Term(iTRAQ4plex); C10(Carbamidomethyl) | 1 | 1 |
| [R].IAVTTHGLPcLAWASQAk.[A]   | C10(Carbamidomethyl); K19(iTRAQ4plex)    | 1 | 1 |
| [K].kPVAFSYIHPVcLPDR.[E]     | N-Term(iTRAQ4plex); K1(iTRAQ4plex)       | 1 | 1 |
| [R].eTAASLLQAGYk.[G]         | N-Term(iTRAQ4plex); K12(iTRAQ4plex)      | 1 | 1 |
| [R].rQEcSIPVcGQDQVTAMTPR.[S] | N-Term(iTRAQ4plex); C4(Carbamidomethyl)  | 1 | 1 |
| [R].VTGWGNLk.[E]             | K8(iTRAQ4plex)                           | 1 | 1 |
| [R].sEGSSVNLSPPLEQcVPDR.[G]  | N-Term(iTRAQ4plex); C15(Carbamidomethyl) | 1 | 1 |
| [R].vTGWGNLk.[E]             | N-Term(iTRAQ4plex); K8(iTRAQ4plex)       | 1 | 1 |
| [R].TFGSGEADcGLRPLFEK.[K]    | C9(Carbamidomethyl); K17(iTRAQ4plex)     | 1 | 1 |
| [R].kSPQELLcGASLISDR.[W]     | N-Term(iTRAQ4plex); K1(iTRAQ4plex)       | 1 | 1 |
| [K].gQPSVLQVVNLPIVERPVck.[D] | N-Term(iTRAQ4plex); C19(Carbamidomethyl) | 1 | 1 |
| [K].hQDFNSAVQLVENFcR.[N]     | N-Term(iTRAQ4plex); C15(Carbamidomethyl) | 1 | 1 |
| [K].ETWTANVGk.[G]            | K9(iTRAQ4plex)                           | 1 | 1 |
| [R].sGIEcQLWR.[S]            | N-Term(iTRAQ4plex); C5(Carbamidomethyl)  | 1 | 1 |

|                                     |                                |   |   |
|-------------------------------------|--------------------------------|---|---|
| [R].gDAcEGDSGGPFVmk.[S]             | N-Term(iTRAQ4plex); C4(Carbam  | 1 | 1 |
| [R].gDAcEGDSGGPFVmk.[S]             | N-Term(iTRAQ4plex); C4(Carbam  | 1 | 1 |
| [R].eLLESYIDGR.[I]                  | N-Term(iTRAQ4plex)             | 1 | 1 |
| [K].eTWTANVGk.[G]                   | N-Term(iTRAQ4plex); K9(iTRAQ4  | 1 | 1 |
| [R].wYQmGIVSWGEGcDR.[D]             | N-Term(iTRAQ4plex); M4(Oxidati | 1 | 1 |
| [R].VTGWGNLk.[E]                    | K8(iTRAQ4plex)                 | 1 | 1 |
| [K].YGFYTHVFR.[L]                   |                                | 1 | 1 |
| [K].IAAcLEGNCaEGLGTNYR.[G]          | N-Term(iTRAQ4plex); C4(Carbam  | 1 | 1 |
| [R].wYQMGIVSWGEGcDR.[D]             | N-Term(iTRAQ4plex); C13(Carbar | 1 | 1 |
| [R].iTDNMFcAGYkPDEGk.[R]            | N-Term(iTRAQ4plex); C7(Carbam  | 1 | 1 |
| [R].vTGWGNLk.[E]                    | N-Term(iTRAQ4plex)             | 1 | 1 |
| [R].vTGWGNLk.[E]                    | N-Term(iTRAQ4plex); K8(iTRAQ4  | 1 | 1 |
| [K].yTAcETAR.[T]                    | N-Term(iTRAQ4plex); C4(Carbam  | 1 | 1 |
| [R].eTAASLLQAGYk.[G]                | N-Term(iTRAQ4plex); K12(iTRAQ  | 1 | 1 |
| [R].sEGSSVNLSPPLEQcVPDR.[G]         | N-Term(iTRAQ4plex); C15(Carbar | 1 | 1 |
| [R].VTGWGNLk.[E]                    | K8(iTRAQ4plex)                 | 1 | 1 |
| [R].vTGWGNLk.[E]                    | N-Term(iTRAQ4plex); K8(iTRAQ4  | 1 | 1 |
| [K].kPVAFSYIHPVcLPDR.[E]            | N-Term(iTRAQ4plex); C13(Carbar | 1 | 1 |
| [K].kPVAFSYIHPVcLPDR.[E]            | K1(iTRAQ4plex); C13(Carbamido  | 1 | 1 |
| [R].iTDNmFcAGYkPDEGk.[R]            | N-Term(iTRAQ4plex); M5(Oxidati | 1 | 1 |
| [R].vTGWGNLk.[E]                    | N-Term(iTRAQ4plex); K8(iTRAQ4  | 1 | 1 |
| [K].kPVAFSYIHPVcLPDR.[E]            | N-Term(iTRAQ4plex); K1(iTRAQ4  | 1 | 1 |
| [R].sEGSSVNLSPPLEQcVPDR.[G]         | N-Term(iTRAQ4plex); C15(Carbar | 1 | 1 |
| [R].vTGWGNLk.[E]                    | N-Term(iTRAQ4plex); K8(iTRAQ4  | 1 | 1 |
| [R].iTDNMFcAGYkPDEGk.[R]            | N-Term(iTRAQ4plex); C7(Carbam  | 1 | 1 |
| [R].wVLTAAHcLLYPPWDk.[N]            | N-Term(iTRAQ4plex); C8(Carbam  | 1 | 1 |
| [R].eTAASLLQAGYk.[G]                | N-Term(iTRAQ4plex); K12(iTRAQ  | 1 | 1 |
| [R].eLLESYIDGR.[I]                  | N-Term(iTRAQ4plex)             | 1 | 1 |
| [R].gDAcEGDSGGPFVmk.[S]             | N-Term(iTRAQ4plex); C4(Carbam  | 1 | 1 |
| [K].kPVAFSYIHPVcLPDR.[E]            | N-Term(iTRAQ4plex); K1(iTRAQ4  | 1 | 1 |
| [R].kSPQELLcGASLISDR.[W]            | N-Term(iTRAQ4plex); K1(iTRAQ4  | 1 | 1 |
| [K].yTAcETAR.[T]                    | N-Term(iTRAQ4plex); C4(Carbam  | 1 | 1 |
| [R].nPDSSTTGPWcYTTDPTVR.[R]         | N-Term(iTRAQ4plex); C11(Carbar | 1 | 1 |
| [R].sVAVYGQYGGQPcVGNAFETQScEPTR.[G] | N-Term(iTRAQ4plex); C13(Carbar | 1 | 1 |
| [R].sVAVYGQYGGQPcVGNAFETQScEPTR.[G] | N-Term(iTRAQ4plex); C13(Carbar | 1 | 1 |
| [R].wLVGEMHcQk.[I]                  | N-Term(iTRAQ4plex); C8(Carbam  | 1 | 1 |
| [K].acGAcPLWGk.[C]                  | N-Term(iTRAQ4plex); C2(Carbam  | 1 | 1 |
| [K].mHVLHcQGR.[N]                   | N-Term(iTRAQ4plex); C6(Carbam  | 1 | 1 |
| [K].mPYEcGPSLDVcAQDER.[S]           | N-Term(iTRAQ4plex); C5(Carbam  | 1 | 1 |
| [K].dGFVQDEGTMFPVGk.[N]             | N-Term(iTRAQ4plex); K15(iTRAQ  | 1 | 1 |
| [R].IIDQYGTHYLQSGSLGGEYR.[V]        | N-Term(iTRAQ4plex)             | 1 | 1 |
| [K].ITPLYELVk.[E]                   | N-Term(iTRAQ4plex); K9(iTRAQ4  | 1 | 1 |
| [K].ITPLYELVk.[E]                   | N-Term(iTRAQ4plex); K9(iTRAQ4  | 1 | 1 |
| [R].vLFYVDSEK.[L]                   | N-Term(iTRAQ4plex); K9(iTRAQ4  | 1 | 1 |
| [R].wLVGEMHcQk.[I]                  | N-Term(iTRAQ4plex); C8(Carbam  | 1 | 1 |
| [R].IIDQYGTHYLQSGSLGGEYR.[V]        | N-Term(iTRAQ4plex)             | 1 | 1 |
| [K].eLSHLPSLYDYSAYR.[R]             | N-Term(iTRAQ4plex)             | 1 | 1 |
| [R].dScTLPASAEk.[A]                 | N-Term(iTRAQ4plex); C3(Carbam  | 1 | 1 |
| [R].dScTLPASAEk.[A]                 | N-Term(iTRAQ4plex); C3(Carbam  | 1 | 1 |
| [R].sYTSHTNEIHk.[G]                 | N-Term(iTRAQ4plex); K11(iTRAQ  | 1 | 1 |
| [K].aASGTQNNVLR.[G]                 | N-Term(iTRAQ4plex)             | 1 | 1 |
| [K].aASGTQNNVLR.[G]                 | N-Term(iTRAQ4plex)             | 1 | 1 |

|                                    |                                 |   |   |
|------------------------------------|---------------------------------|---|---|
| [K].dGFVQDEGTmFPVGk.[N]            | N-Term(iTRAQ4plex); M10(Oxidati | 1 | 1 |
| [R].ISGNVLSYTFQVk.[I]              | N-Term(iTRAQ4plex); K13(iTRAQ4  | 1 | 1 |
| [R].ySAWAESVTNLPQVIk.[Q]           | N-Term(iTRAQ4plex); K16(iTRAQ4  | 1 | 1 |
| [R].ySAWAESVTNLPQVIk.[Q]           | N-Term(iTRAQ4plex); K16(iTRAQ4  | 1 | 1 |
| [K].vTVScSGGMSLEGPSAFLcGSSLk.[W]   | N-Term(iTRAQ4plex); C5(Carbam   | 1 | 1 |
| [K].iAcVLPVLMdGIQSHpQkPFYTVGEk.[V] | N-Term(iTRAQ4plex); C3(Carbam   | 1 | 1 |
| [K].eQTMSEcEAGALR.[C]              | N-Term(iTRAQ4plex); C7(Carbam   | 1 | 1 |
| [K].eQTMSEcEAGALR.[C]              | N-Term(iTRAQ4plex); C7(Carbam   | 1 | 1 |
| [K].eQTMSEcEAGALR.[C]              | N-Term(iTRAQ4plex); C7(Carbam   | 1 | 1 |
| [K].eQTMSEcEAGALR.[C]              | N-Term(iTRAQ4plex); C7(Carbam   | 1 | 1 |
| [R].rYSAWAESVTNLPQVIk.[Q]          | N-Term(iTRAQ4plex); K17(iTRAQ4  | 1 | 1 |
| [K].eQTMSEcEAGALR.[C]              | N-Term(iTRAQ4plex); C7(Carbam   | 1 | 1 |
| [R].wLVGEmHcQk.[I]                 | N-Term(iTRAQ4plex); M6(Oxidati  | 1 | 1 |
| [K].mHVLHcQGR.[N]                  | N-Term(iTRAQ4plex); C6(Carbam   | 1 | 1 |
| [K].eLSHLPSLYDYSAYR.[R]            | N-Term(iTRAQ4plex)              | 1 | 1 |
| [K].ITPLYELVk.[E]                  | N-Term(iTRAQ4plex); K9(iTRAQ4   | 1 | 1 |
| [R].gcPTEEGcGER.[F]                | N-Term(iTRAQ4plex); C2(Carbam   | 1 | 1 |
| [K].eLENAlk.[AN]                   | N-Term(iTRAQ4plex); K7(iTRAQ4   | 1 | 2 |
| [K].iAcVLPVLMdGIQSHpQkPFYTVGEk.[V] | N-Term(iTRAQ4plex); C3(Carbam   | 1 | 1 |
| [R].wLVGEMHcQk.[I]                 | N-Term(iTRAQ4plex); C8(Carbam   | 1 | 1 |
| [R].YSAWAESVTNLPQVIk.[Q]           | K16(iTRAQ4plex)                 | 1 | 1 |
| [R].VLFYVDSEK.[L]                  | K9(iTRAQ4plex)                  | 1 | 1 |
| [K].qNDFNSVEEK.[K]                 | N-Term(iTRAQ4plex); K10(iTRAQ4  | 1 | 1 |
| [K].eVPcASVk.[K]                   | N-Term(iTRAQ4plex); C4(Carbam   | 1 | 1 |
| [R].iLPLTVck.[M]                   | N-Term(iTRAQ4plex); C7(Carbam   | 1 | 1 |
| [K].fSSHGck.[E]                    | N-Term(iTRAQ4plex); C6(Carbam   | 1 | 1 |
| [K].acGAcPLWgk.[C]                 | N-Term(iTRAQ4plex); C2(Carbam   | 1 | 1 |
| [K].eQTMSEcEAGALR.[C]              | N-Term(iTRAQ4plex); M4(Oxidati  | 1 | 1 |
| [K].sSGWHFVvk.[F]                  | N-Term(iTRAQ4plex); K9(iTRAQ4   | 1 | 1 |
| [K].eQTMSEcEAGALR.[C]              | N-Term(iTRAQ4plex); M4(Oxidati  | 1 | 1 |
| [K].sSGWHFVvk.[F]                  | N-Term(iTRAQ4plex); K9(iTRAQ4   | 1 | 1 |
| [K].eLENAlk.[AN]                   | N-Term(iTRAQ4plex); K7(iTRAQ4   | 1 | 2 |
| [K].sSGWHFVvk.[F]                  | N-Term(iTRAQ4plex); K9(iTRAQ4   | 1 | 1 |
| [R].dScTLPASAEk.[A]                | N-Term(iTRAQ4plex); C3(Carbam   | 1 | 1 |
| [K].eQTMSEcEAGALR.[C]              | N-Term(iTRAQ4plex); C7(Carbam   | 1 | 1 |
| [K].IQPLDFkENAEQSR.[A]             | N-Term(iTRAQ4plex); K7(iTRAQ4   | 1 | 1 |
| [K].LQPLDFkENAEQSR.[A]             |                                 | 1 | 1 |
| [K].skLPGIVAEGR.[D]                | N-Term(iTRAQ4plex); K2(iTRAQ4   | 1 | 1 |
| [K].eQLQDMGLVLDLFsPEk.[S]          | N-Term(iTRAQ4plex); K16(iTRAQ4  | 1 | 1 |
| [K].eQLQDMGLVLDLFsPEk.[S]          | N-Term(iTRAQ4plex); K16(iTRAQ4  | 1 | 1 |
| [K].EQLQDMGLVLDLFsPEk.[S]          | K16(iTRAQ4plex)                 | 1 | 1 |
| [K].EQLQDMGLVLDLFsPEk.[S]          | K16(iTRAQ4plex)                 | 1 | 1 |
| [K].aTEDEGSEQk.[I]                 | N-Term(iTRAQ4plex); K10(iTRAQ4  | 1 | 1 |
| [K].kATEDEGSEQk.[I]                | N-Term(iTRAQ4plex); K1(iTRAQ4   | 1 | 1 |
| [K].eQLQDMGLVLDLFsPEk.[S]          | N-Term(iTRAQ4plex); K16(iTRAQ4  | 1 | 1 |
| [K].aNRPFVLFIR.[E]                 | N-Term(iTRAQ4plex)              | 1 | 1 |
| [K].aNRPFVLFIR.[E]                 | N-Term(iTRAQ4plex)              | 1 | 1 |
| [R].fATTfYQHlADSk.[N]              | N-Term(iTRAQ4plex); K13(iTRAQ4  | 1 | 1 |
| [K].skLPGIVAEGR.[D]                | N-Term(iTRAQ4plex); K2(iTRAQ4   | 1 | 1 |
| [K].skLPGIVAEGR.[D]                | N-Term(iTRAQ4plex); K2(iTRAQ4   | 1 | 1 |
| [K].aTEDEGSEQk.[I]                 | N-Term(iTRAQ4plex); K10(iTRAQ4  | 1 | 1 |
| [K].skLPGIVAEGR.[D]                | N-Term(iTRAQ4plex)              | 1 | 1 |



|                                        |                                |   |   |
|----------------------------------------|--------------------------------|---|---|
| [R].FATTFYQHLADSk.[N]                  | K13(iTRAQ4plex)                | 1 | 1 |
| [R].FATTFYQHLADSk.[N]                  | K13(iTRAQ4plex)                | 1 | 1 |
| [K].kATEDEGSEQk.[I]                    | N-Term(iTRAQ4plex); K1(iTRAQ4  | 1 | 1 |
| [R].dIPMNPmMcIYR.[S]                   | N-Term(iTRAQ4plex); C8(Carbam  | 1 | 1 |
| [R].fATTFYQHLADSk.[N]                  | N-Term(iTRAQ4plex); K13(iTRAQ  | 1 | 1 |
| [R].fATTFYQHLADSk.[N]                  | N-Term(iTRAQ4plex); K13(iTRAQ  | 1 | 1 |
| [R].fATTFYQHLADSk.[N]                  | N-Term(iTRAQ4plex); K13(iTRAQ  | 1 | 1 |
| [R].fATTFYQHLADSk.[N]                  | N-Term(iTRAQ4plex); K13(iTRAQ  | 1 | 1 |
| [K].TSDQIHFFFAk.[L]                    | K11(iTRAQ4plex)                | 1 | 1 |
| [K].tSDQIHFFFAk.[L]                    | N-Term(iTRAQ4plex); K11(iTRAQ  | 1 | 1 |
| [K].tSDQIHFFFAk.[L]                    | N-Term(iTRAQ4plex); K11(iTRAQ  | 1 | 1 |
| [K].tSDQIHFFFAk.[L]                    | N-Term(iTRAQ4plex); K11(iTRAQ  | 1 | 1 |
| [K].tSDQIHFFFAk.[L]                    | N-Term(iTRAQ4plex); K11(iTRAQ  | 1 | 1 |
| [K].tSDQIHFFFAk.[L]                    | N-Term(iTRAQ4plex); K11(iTRAQ  | 1 | 1 |
| [K].aTEDEGSEQk.[I]                     | N-Term(iTRAQ4plex); K10(iTRAQ  | 1 | 1 |
| [R].rVAEGTQVLELPPfk.[G]                | N-Term(iTRAQ4plex); K14(iTRAQ  | 1 | 1 |
| [K].IPGIVAEGR.[D]                      | N-Term(iTRAQ4plex)             | 1 | 1 |
| [K].eQLQDmGLVLDLFSPEk.[S]              | N-Term(iTRAQ4plex); M6(Oxidati | 1 | 1 |
| [K].eQLQDMGLVLDLFSPEk.[S]              | N-Term(iTRAQ4plex); K16(iTRAQ  | 1 | 1 |
| [K].eQLQDMGLVLDLFSPEk.[S]              | N-Term(iTRAQ4plex); K16(iTRAQ  | 1 | 1 |
| [R].vAEGTQVLELPPfk.[G]                 | N-Term(iTRAQ4plex); K13(iTRAQ  | 1 | 1 |
| [R].vAEGTQVLELPPfk.[G]                 | N-Term(iTRAQ4plex); K13(iTRAQ  | 1 | 1 |
| [K].gDDITMVLILPkPEk.[S]                | N-Term(iTRAQ4plex); K12(iTRAQ  | 1 | 1 |
| [K].gDDITMVLILPkPEk.[S]                | N-Term(iTRAQ4plex); K12(iTRAQ  | 1 | 1 |
| [K].gDDITMVLILPkPEk.[S]                | N-Term(iTRAQ4plex); K12(iTRAQ  | 1 | 1 |
| [K].gDDITMVLILPkPEk.[S]                | N-Term(iTRAQ4plex); K12(iTRAQ  | 1 | 1 |
| [R].dDLVSDAFHk.[A]                     | N-Term(iTRAQ4plex); K11(iTRAQ  | 1 | 1 |
| [R].dDLVSDAFHk.[A]                     | N-Term(iTRAQ4plex); K11(iTRAQ  | 1 | 1 |
| [R].dDLVSDAFHk.[A]                     | N-Term(iTRAQ4plex); K11(iTRAQ  | 1 | 1 |
| [K].aDGEScSASmMYQEGk.[F]               | N-Term(iTRAQ4plex); C6(Carbam  | 1 | 1 |
| [R].rVAEGTQVLELPPfkGDDITMVLILPkPEk.[S] | N-Term(iTRAQ4plex); K14(iTRAQ  | 1 | 1 |
| [K].aDGEScSASmMYQEGk.[F]               | N-Term(iTRAQ4plex); C6(Carbam  | 1 | 1 |
| [K].aTEDEGSEQk.[I]                     | N-Term(iTRAQ4plex); K10(iTRAQ  | 1 | 1 |
| [R].vAEGTQVLELPPfkGDDITMVLILPkPEk.[S]  | N-Term(iTRAQ4plex); K13(iTRAQ  | 1 | 1 |
| [K].aTEDEGSEQk.[I]                     | N-Term(iTRAQ4plex); K10(iTRAQ  | 1 | 1 |
| [R].evPLNTIIFMGR.[V]                   | N-Term(iTRAQ4plex)             | 1 | 1 |
| [R].evPLNTIIFMGR.[V]                   | N-Term(iTRAQ4plex)             | 1 | 1 |
| [K].aDGEScSASmMYQEGk.[F]               | N-Term(iTRAQ4plex); C6(Carbam  | 1 | 1 |
| [R].dDLVSDAFHk.[A]                     | N-Term(iTRAQ4plex); K11(iTRAQ  | 1 | 1 |
| [K].kATEDEGSEQk.[I]                    | N-Term(iTRAQ4plex); K1(iTRAQ4  | 1 | 1 |
| [K].aNRPFVLFIR.[E]                     | N-Term(iTRAQ4plex)             | 1 | 1 |
| [K].aFLEVNEEGSEAAASTAVVIAGR.[S]        | N-Term(iTRAQ4plex)             | 1 | 1 |
| [K].aTEDEGSEQk.[I]                     | N-Term(iTRAQ4plex); K10(iTRAQ  | 1 | 1 |
| [K].kATEDEGSEQk.[I]                    | N-Term(iTRAQ4plex); K1(iTRAQ4  | 1 | 1 |
| [K].aTEDEGSEQkIPEATNR.[R]              | N-Term(iTRAQ4plex); K10(iTRAQ  | 1 | 1 |
| [K].SkLPGIVAEGR.[D]                    | K2(iTRAQ4plex)                 | 1 | 1 |
| [K].aTEDEGSEQk.[I]                     | N-Term(iTRAQ4plex); K10(iTRAQ  | 1 | 1 |
| [R].iEDGFSLk.[E]                       | N-Term(iTRAQ4plex); K8(iTRAQ4  | 1 | 1 |
| [K].aDGEScSASmMYQEGk.[F]               | N-Term(iTRAQ4plex); C6(Carbam  | 1 | 1 |
| [K].aDGEScSASmMYQEGk.[F]               | N-Term(iTRAQ4plex); C6(Carbam  | 1 | 1 |
| [K].TSDQIHFFFAk.[L]                    | K11(iTRAQ4plex)                | 1 | 1 |
| [K].aTEDEGSEQk.[I]                     | N-Term(iTRAQ4plex); K10(iTRAQ  | 1 | 1 |

|                            |                                     |   |   |
|----------------------------|-------------------------------------|---|---|
| [K].gDDITMVLILPkPEk.[S]    | N-Term(iTRAQ4plex); K12(iTRAQ4plex) | 1 | 1 |
| [K].aTEDEGSEQk.[I]         | N-Term(iTRAQ4plex); K10(iTRAQ4plex) | 1 | 1 |
| [K].TSDQIHFFFAk.[L]        | K11(iTRAQ4plex)                     | 1 | 1 |
| [K].tSDQIHFFFAk.[L]        | N-Term(iTRAQ4plex); K11(iTRAQ4plex) | 1 | 1 |
| [R].fATTFYQHLADSk.[N]      | N-Term(iTRAQ4plex); K13(iTRAQ4plex) | 1 | 1 |
| [K].aTEDEGSEQk.[I]         | N-Term(iTRAQ4plex); K10(iTRAQ4plex) | 1 | 1 |
| [K].tSDQIHFFFAk.[L]        | N-Term(iTRAQ4plex); K11(iTRAQ4plex) | 1 | 1 |
| [R].iEDGFSLk.[E]           | N-Term(iTRAQ4plex); K8(iTRAQ4plex)  | 1 | 1 |
| [K].tSDQIHFFFAk.[L]        | N-Term(iTRAQ4plex); K11(iTRAQ4plex) | 1 | 1 |
| [K].skLPGIVAEGR.[D]        | N-Term(iTRAQ4plex); K2(iTRAQ4plex)  | 1 | 1 |
| [R].VAEGTQVLELPfk.[G]      | K13(iTRAQ4plex)                     | 1 | 1 |
| [R].rVWELSk.[A]            | N-Term(iTRAQ4plex); K7(iTRAQ4plex)  | 1 | 1 |
| [K].tSDQIHFFFAk.[L]        | N-Term(iTRAQ4plex); K11(iTRAQ4plex) | 1 | 1 |
| [R].IEDGFSLk.[E]           | K8(iTRAQ4plex)                      | 1 | 1 |
| [K].fDTISEk.[T]            | N-Term(iTRAQ4plex); K7(iTRAQ4plex)  | 1 | 1 |
| [K].tSDQIHFFFAk.[L]        | N-Term(iTRAQ4plex); K11(iTRAQ4plex) | 1 | 1 |
| [K].IPGIVAEGR.[D]          | N-Term(iTRAQ4plex)                  | 1 | 1 |
| [K].eQLQDMGLVLDLFSPEk.[S]  | N-Term(iTRAQ4plex); K16(iTRAQ4plex) | 1 | 1 |
| [R].fATTFYQHLADSk.[N]      | N-Term(iTRAQ4plex); K13(iTRAQ4plex) | 1 | 1 |
| [R].vAEGTQVLELPfk.[G]      | N-Term(iTRAQ4plex); K13(iTRAQ4plex) | 1 | 1 |
| [R].rVWELSkANSR.[F]        | N-Term(iTRAQ4plex); K7(iTRAQ4plex)  | 1 | 1 |
| [K].fDTISEk.[T]            | N-Term(iTRAQ4plex); K7(iTRAQ4plex)  | 1 | 1 |
| [K].kATEDEGSEQk.[I]        | N-Term(iTRAQ4plex); K1(iTRAQ4plex)  | 1 | 1 |
| [K].aDGEScSASMMYQEGkFR.[Y] | N-Term(iTRAQ4plex); C6(Carbamid)    | 1 | 1 |
| [R].fATTFYQHLADSk.[N]      | N-Term(iTRAQ4plex); K13(iTRAQ4plex) | 1 | 1 |
| [K].aDGEScSASmMYQEGk.[F]   | N-Term(iTRAQ4plex); C6(Carbamid)    | 1 | 1 |
| [K].aDGEScSASmMYQEGk.[F]   | N-Term(iTRAQ4plex); C6(Carbamid)    | 1 | 1 |
| [R].rVAEGTQVLELPfk.[G]     | N-Term(iTRAQ4plex); K14(iTRAQ4plex) | 1 | 1 |
| [K].eQLQDMGLVLDLFSPEk.[S]  | N-Term(iTRAQ4plex); M6(Oxidation)   | 1 | 1 |
| [R].EVPLNTIIFMGR.[V]       |                                     | 1 | 1 |
| [K].sskLVSANR.[L]          | N-Term(iTRAQ4plex); K3(iTRAQ4plex)  | 1 | 1 |
| [R].dDLYVSDAFHK.[A]        | N-Term(iTRAQ4plex); K11(iTRAQ4plex) | 1 | 1 |
| [R].fATTFYQHLADSk.[N]      | N-Term(iTRAQ4plex); K13(iTRAQ4plex) | 1 | 1 |
| [K].fDTISEk.[T]            | N-Term(iTRAQ4plex); K7(iTRAQ4plex)  | 1 | 1 |
| [K].aTEDEGSEQk.[I]         | N-Term(iTRAQ4plex); K10(iTRAQ4plex) | 1 | 1 |
| [K].aTEDEGSEQk.[I]         | N-Term(iTRAQ4plex); K10(iTRAQ4plex) | 1 | 1 |
| [K].aDGEScSASMMYQEGk.[F]   | N-Term(iTRAQ4plex); C6(Carbamid)    | 1 | 1 |
| [K].eQLQDMGLVLDLFSPEk.[S]  | N-Term(iTRAQ4plex); M6(Oxidation)   | 1 | 1 |
| [R].dIPMNPmCiYR.[S]        | N-Term(iTRAQ4plex); C8(Carbamid)    | 1 | 1 |
| [K].fDTISEk.[T]            | N-Term(iTRAQ4plex); K7(iTRAQ4plex)  | 1 | 1 |
| [K].IQPLDFk.[E]            | N-Term(iTRAQ4plex); K7(iTRAQ4plex)  | 1 | 1 |
| [R].rVWELSk.[A]            | N-Term(iTRAQ4plex); K7(iTRAQ4plex)  | 1 | 1 |
| [K].sskLVSANR.[L]          | N-Term(iTRAQ4plex); K3(iTRAQ4plex)  | 1 | 1 |
| [K].tSDQIHFFFAk.[L]        | N-Term(iTRAQ4plex); K11(iTRAQ4plex) | 1 | 1 |
| [R].dDLYVSDAFHK.[A]        | N-Term(iTRAQ4plex); K11(iTRAQ4plex) | 1 | 1 |
| [R].rVWELSk.[A]            | N-Term(iTRAQ4plex); K7(iTRAQ4plex)  | 1 | 1 |
| [K].aNRPFVLFIR.[E]         | N-Term(iTRAQ4plex)                  | 1 | 1 |
| [K].IQPLDFk.[E]            | N-Term(iTRAQ4plex); K7(iTRAQ4plex)  | 1 | 1 |
| [K].tSDQIHFFFAk.[L]        | N-Term(iTRAQ4plex); K11(iTRAQ4plex) | 1 | 1 |
| [R].dIPMNPmCiYR.[S]        | N-Term(iTRAQ4plex); C8(Carbamid)    | 1 | 1 |
| [K].IQPLDFk.[E]            | N-Term(iTRAQ4plex); K7(iTRAQ4plex)  | 1 | 1 |
| [K].aDGEScSASMMYQEGkFR.[Y] | N-Term(iTRAQ4plex); C6(Carbamid)    | 1 | 1 |

|                                |                                          |   |   |
|--------------------------------|------------------------------------------|---|---|
| [K].TLNlcEVGTIR.[C]            | C5(Carbamidomethyl)                      | 1 | 1 |
| [R].vPANLENVGFVQTAEDDLk.[T]    | N-Term(iTRAQ4plex); K20(iTRAQ4plex)      | 1 | 1 |
| [R].vPANLENVGFVQTAEDDLk.[T]    | N-Term(iTRAQ4plex); K20(iTRAQ4plex)      | 1 | 1 |
| [R].vPANLENVGFVQTAEDDLk.[T]    | N-Term(iTRAQ4plex); K20(iTRAQ4plex)      | 1 | 1 |
| [K].cLNNQQLHFLHIGScQDGR.[Q]    | N-Term(iTRAQ4plex); C1(Carbamidomethyl)  | 1 | 1 |
| [K].aLNHLPLEYNSALYSR.[I]       | N-Term(iTRAQ4plex)                       | 1 | 1 |
| [K].cVcLLPPQcFk.[G]            | N-Term(iTRAQ4plex); C1(Carbamidomethyl)  | 1 | 1 |
| [K].aLNHLPLEYNSALYSR.[I]       | N-Term(iTRAQ4plex)                       | 1 | 1 |
| [K].aLNHLPLEYNSALYSR.[I]       | N-Term(iTRAQ4plex)                       | 1 | 1 |
| [K].cVcLLPPQcFk.[G]            | N-Term(iTRAQ4plex); C1(Carbamidomethyl)  | 1 | 1 |
| [K].tFSEWLESVk.[E]             | N-Term(iTRAQ4plex); K10(iTRAQ4plex)      | 1 | 1 |
| [K].tFSEWLESVk.[E]             | N-Term(iTRAQ4plex); K10(iTRAQ4plex)      | 1 | 1 |
| [K].eNPAVIDFELAPIVDLVR.[N]     | N-Term(iTRAQ4plex)                       | 1 | 1 |
| [K].eNPAVIDFELAPIVDLVR.[N]     | N-Term(iTRAQ4plex)                       | 1 | 1 |
| [R].cPINcLLGDFGPWSDcDPcIEk.[Q] | N-Term(iTRAQ4plex); C1(Carbamidomethyl)  | 1 | 1 |
| [K].rSENINHNSAFk.[Q]           | N-Term(iTRAQ4plex); K12(iTRAQ4plex)      | 1 | 1 |
| [K].aLQEYAAk.[F]               | N-Term(iTRAQ4plex); K8(iTRAQ4plex)       | 1 | 1 |
| [K].qAIQASHk.[K]               | N-Term(iTRAQ4plex); K8(iTRAQ4plex)       | 1 | 1 |
| [K].rSENINHNSAFk.[Q]           | N-Term(iTRAQ4plex); K12(iTRAQ4plex)      | 1 | 1 |
| [K].rSENINHNSAFk.[Q]           | N-Term(iTRAQ4plex); K12(iTRAQ4plex)      | 1 | 1 |
| [K].yQENFcEQIcSk.[Q]           | N-Term(iTRAQ4plex); C7(Carbamidomethyl)  | 1 | 1 |
| [R].iGESIELTcPk.[G]            | N-Term(iTRAQ4plex); C9(Carbamidomethyl)  | 1 | 1 |
| [K].qAIQASHk.[K]               | N-Term(iTRAQ4plex); K8(iTRAQ4plex)       | 1 | 1 |
| [K].qAIQASHk.[K]               | N-Term(iTRAQ4plex); K8(iTRAQ4plex)       | 1 | 1 |
| [R].gEVLDNSFTGGIck.[T]         | N-Term(iTRAQ4plex); C13(Carbamidomethyl) | 1 | 1 |
| [R].gEVLDNSFTGGIck.[T]         | N-Term(iTRAQ4plex); C13(Carbamidomethyl) | 1 | 1 |
| [K].gSSGLEEK.[T]               | N-Term(iTRAQ4plex); K8(iTRAQ4plex)       | 1 | 1 |
| [R].sENINHNSAFk.[Q]            | N-Term(iTRAQ4plex); K11(iTRAQ4plex)      | 1 | 1 |
| [R].kmEILHPGk.[C]              | N-Term(iTRAQ4plex); K1(iTRAQ4plex)       | 1 | 1 |
| [R].kmEILHPGk.[C]              | N-Term(iTRAQ4plex); K1(iTRAQ4plex)       | 1 | 1 |
| [K].qAIQASHk.[K]               | N-Term(iTRAQ4plex); K8(iTRAQ4plex)       | 1 | 1 |
| [K].aLNHLPLEYNSALYSR.[I]       | N-Term(iTRAQ4plex)                       | 1 | 1 |
| [R].kMEILHPGk.[C]              | N-Term(iTRAQ4plex); K1(iTRAQ4plex)       | 1 | 1 |
| [K].iEEADck.[N]                | N-Term(iTRAQ4plex); C6(Carbamidomethyl)  | 1 | 1 |
| [K].kEScGYDTcYDWEk.[C]         | N-Term(iTRAQ4plex); K1(iTRAQ4plex)       | 1 | 1 |
| [K].cLNNQQLHFLHIGScQDGR.[Q]    | N-Term(iTRAQ4plex); C1(Carbamidomethyl)  | 1 | 1 |
| [K].tLNlcEVGTIR.[C]            | N-Term(iTRAQ4plex); C5(Carbamidomethyl)  | 1 | 1 |
| [K].eScGYDTcYDWEk.[C]          | N-Term(iTRAQ4plex); C3(Carbamidomethyl)  | 1 | 1 |
| [K].tLNlcEVGTIR.[C]            | N-Term(iTRAQ4plex); C5(Carbamidomethyl)  | 1 | 1 |
| [K].gFVVAGPSR.[Y]              | N-Term(iTRAQ4plex)                       | 1 | 1 |
| [K].iEEADck.[N]                | N-Term(iTRAQ4plex); C6(Carbamidomethyl)  | 1 | 1 |
| [K].IkGHcQLGQk.[Q]             | N-Term(iTRAQ4plex); K2(iTRAQ4plex)       | 1 | 1 |
| [K].mEILHPGk.[C]               | N-Term(iTRAQ4plex); M1(Oxidation)        | 1 | 1 |
| [K].ALNHLPLEYNSALYSR.[I]       |                                          | 1 | 1 |
| [K].dLHLSDVFLk.[A]             | N-Term(iTRAQ4plex); K10(iTRAQ4plex)      | 1 | 1 |
| [R].NIPcAVTk.[R]               | C4(Carbamidomethyl); K8(iTRAQ4plex)      | 1 | 1 |
| [R].kMEILHPGk.[C]              | N-Term(iTRAQ4plex); K1(iTRAQ4plex)       | 1 | 1 |
| [R].sEYGAALAWEk.[G]            | N-Term(iTRAQ4plex); K11(iTRAQ4plex)      | 1 | 1 |
| [K].IkGHcQLGQk.[Q]             | N-Term(iTRAQ4plex); K2(iTRAQ4plex)       | 1 | 1 |
| [K].aLQEYAAk.[F]               | N-Term(iTRAQ4plex); K8(iTRAQ4plex)       | 1 | 1 |
| [R].iGESIELTcPk.[G]            | N-Term(iTRAQ4plex); C9(Carbamidomethyl)  | 1 | 1 |
| [R].nIPcAVTk.[R]               | N-Term(iTRAQ4plex); C4(Carbamidomethyl)  | 1 | 1 |

|                                    |                                |   |   |
|------------------------------------|--------------------------------|---|---|
| [K].gHcQLGQk.[Q]                   | N-Term(iTRAQ4plex); C3(Carbam  | 1 | 1 |
| [K].tFSEWLESVk.[E]                 | N-Term(iTRAQ4plex); K10(iTRAQ  | 1 | 1 |
| [K].gHcQLGQk.[Q]                   | N-Term(iTRAQ4plex); C3(Carbam  | 1 | 1 |
| [K].gHcQLGQk.[Q]                   | N-Term(iTRAQ4plex); C3(Carbam  | 1 | 1 |
| [K].tFSEWLESVk.[E]                 | N-Term(iTRAQ4plex); K10(iTRAQ  | 1 | 1 |
| [R].sEYGAALAWEk.[G]                | N-Term(iTRAQ4plex); K11(iTRAQ  | 1 | 1 |
| [K].gFVVAGPSR.[Y]                  | N-Term(iTRAQ4plex)             | 1 | 1 |
| [R].rPcFESLk.[A]                   | N-Term(iTRAQ4plex); C3(Carbam  | 1 | 1 |
| [K].vMNHicSk.[Q]                   | N-Term(iTRAQ4plex); C6(Carbam  | 1 | 1 |
| [R].TINPAVDHcck.[T]                | C9(Carbamidomethyl); C10(Carb  | 1 | 1 |
| [K].eLISLVEDVSSNYDGccEGDVVQcIR.[D] | N-Term(iTRAQ4plex); C16(Carbar | 1 | 1 |
| [K].IPNNVLOEk.[I]                  | N-Term(iTRAQ4plex); K9(iTRAQ4  | 1 | 1 |
| [K].vMNHicSk.[Q]                   | N-Term(iTRAQ4plex); C6(Carbam  | 1 | 1 |
| [R].rHPDLSIPELLR.[I]               | N-Term(iTRAQ4plex)             | 1 | 1 |
| [K].eLISLVEDVSSNYDGccEGDVVQcIR.[D] | N-Term(iTRAQ4plex); C16(Carbar | 1 | 1 |
| [K].eLISLVEDVSSNYDGccEGDVVQcIR.[D] | N-Term(iTRAQ4plex); C16(Carbar | 1 | 1 |
| [R].rPcFESLk.[A]                   | N-Term(iTRAQ4plex); C3(Carbam  | 1 | 1 |
| [R].rPcFESLk.[A]                   | N-Term(iTRAQ4plex); C3(Carbam  | 1 | 1 |
| [K].HELTDEELQSLFTNFANVVDk.[C]      | K21(iTRAQ4plex)                | 1 | 1 |
| [K].SDVGFLPPFPTLDPEEK.[C]          | K17(iTRAQ4plex)                | 1 | 1 |
| [K].sDVGFLLPPFPTLDPEEK.[C]         | N-Term(iTRAQ4plex); K17(iTRAQ  | 1 | 1 |
| [R].TINPAVDHcck.[T]                | C9(Carbamidomethyl); C10(Carb  | 1 | 1 |
| [R].hPDLSIPELLR.[I]                | N-Term(iTRAQ4plex)             | 1 | 1 |
| [R].rHPDLSIPELLR.[I]               | N-Term(iTRAQ4plex)             | 1 | 1 |
| [R].rHPDLSIPELLR.[I]               | N-Term(iTRAQ4plex)             | 1 | 1 |
| [R].rHPDLSIPELLR.[I]               | N-Term(iTRAQ4plex)             | 1 | 1 |
| [R].rHPDLSIPELLR.[I]               | N-Term(iTRAQ4plex)             | 1 | 1 |
| [R].rHPDLSIPELLR.[I]               | N-Term(iTRAQ4plex)             | 1 | 1 |
| [R].aIPVTQYLk.[A]                  | N-Term(iTRAQ4plex); K9(iTRAQ4  | 1 | 1 |
| [R].aIPVTQYLk.[A]                  | N-Term(iTRAQ4plex); K9(iTRAQ4  | 1 | 1 |
| [K].sDVGFLLPPFPTLDPEEK.[C]         | N-Term(iTRAQ4plex); K17(iTRAQ  | 1 | 1 |
| [R].rHPDLSIPELLR.[I]               | N-Term(iTRAQ4plex)             | 1 | 1 |
| [R].rHPDLSIPELLR.[I]               | N-Term(iTRAQ4plex)             | 1 | 1 |
| [R].rHPDLSIPELLR.[I]               | N-Term(iTRAQ4plex)             | 1 | 1 |
| [R].rHPDLSIPELLR.[I]               | N-Term(iTRAQ4plex)             | 1 | 1 |
| [R].RHPDLSIPELLR.[I]               |                                | 1 | 1 |
| [K].hELTDEELQSLFTNFANVVDk.[C]      | N-Term(iTRAQ4plex); K21(iTRAQ  | 1 | 1 |
| [K].hELTDEELQSLFTNFANVVDk.[C]      | N-Term(iTRAQ4plex); K21(iTRAQ  | 1 | 1 |
| [K].icAMEGLPQk.[H]                 | N-Term(iTRAQ4plex); C2(Carbam  | 1 | 1 |
| [K].TYVPPPFSQLFTFHADMcQSQNEELQR.[  | C19(Carbamidomethyl)           | 1 | 1 |
| [K].tYVPPPFSQLFTFHADMcQSQNEELQR.[  | N-Term(iTRAQ4plex); C19(Carbar | 1 | 1 |
| [K].kSDVGFLPPFPTLDPEEK.[C]         | N-Term(iTRAQ4plex); K1(iTRAQ4  | 1 | 1 |
| [K].kSDVGFLPPFPTLDPEEK.[C]         | N-Term(iTRAQ4plex); K1(iTRAQ4  | 1 | 1 |
| [K].LkHELTDEELQSLFTNFANVVDk.[C]    | K2(iTRAQ4plex); K23(iTRAQ4ple  | 1 | 1 |
| [K].IKHELTDEELQSLFTNFANVVDk.[C]    | N-Term(iTRAQ4plex); K23(iTRAQ  | 1 | 1 |
| [K].iAPQLSTEELVSLGek.[M]           | N-Term(iTRAQ4plex); K16(iTRAQ  | 1 | 1 |
| [K].iAPQLSTEELVSLGek.[M]           | N-Term(iTRAQ4plex); K16(iTRAQ  | 1 | 1 |
| [K].iAPQLSTEELVSLGek.[M]           | N-Term(iTRAQ4plex); K16(iTRAQ  | 1 | 1 |
| [K].iAPQLSTEELVSLGek.[M]           | N-Term(iTRAQ4plex); K16(iTRAQ  | 1 | 1 |
| [K].IkHELTDEELQSLFTNFANVVDk.[C]    | N-Term(iTRAQ4plex); K2(iTRAQ4  | 1 | 1 |
| [K].IkHELTDEELQSLFTNFANVVDk.[C]    | N-Term(iTRAQ4plex); K2(iTRAQ4  | 1 | 1 |
| [R].dADPDTFFAk.[F]                 | N-Term(iTRAQ4plex); K10(iTRAQ  | 1 | 1 |

|                        |                               |   |   |
|------------------------|-------------------------------|---|---|
| [R].dADPDTFFAk.[F]     | N-Term(iTRAQ4plex); K10(iTRAQ | 1 | 1 |
| [K].ftDSENVcQER.[D]    | N-Term(iTRAQ4plex); C8(Carbam | 1 | 1 |
| [K].ftDSENVcQER.[D]    | N-Term(iTRAQ4plex); C8(Carbam | 1 | 1 |
| [R].TINPAVDHcck.[T]    | C9(Carbamidomethyl); C10(Carb | 1 | 1 |
| [R].TINPAVDHcck.[T]    | C9(Carbamidomethyl); C10(Carb | 1 | 1 |
| [R].tINPAVDHcck.[T]    | N-Term(iTRAQ4plex); C9(Carbam | 1 | 1 |
| [R].tINPAVDHcck.[T]    | N-Term(iTRAQ4plex); C9(Carbam | 1 | 1 |
| [K].vVHFYIAILSQk.[F]   | N-Term(iTRAQ4plex); K13(iTRAQ | 1 | 1 |
| [R].eSLLNHFLYEVAR.[R]  | N-Term(iTRAQ4plex)            | 1 | 1 |
| [K].aESPEVcFNEESPk.[I] | N-Term(iTRAQ4plex); C7(Carbam | 1 | 1 |
| [R].eSLLNHFLYEVAR.[R]  | N-Term(iTRAQ4plex)            | 1 | 1 |
| [K].aESPEVcFNEESPk.[I] | N-Term(iTRAQ4plex); C7(Carbam | 1 | 1 |
| [R].eSLLNHFLYEVAR.[R]  | N-Term(iTRAQ4plex)            | 1 | 1 |
| [K].FTDSENVcQER.[D]    | C8(Carbamidomethyl)           | 1 | 1 |
| [K].FTDSENVcQER.[D]    | C8(Carbamidomethyl)           | 1 | 1 |
| [R].lcFFYNk.[K]        | N-Term(iTRAQ4plex); C2(Carbam | 1 | 1 |
| [R].gQcIINSNk.[D]      | N-Term(iTRAQ4plex); C3(Carbam | 1 | 1 |
| [K].FTDSENVcQER.[D]    | C8(Carbamidomethyl)           | 1 | 1 |
| [R].rHPDLSIPELLR.[I]   | N-Term(iTRAQ4plex)            | 1 | 1 |
| [R].tINPAVDHcck.[T]    | N-Term(iTRAQ4plex); C9(Carbam | 1 | 1 |
| [R].TINPAVDHcck.[T]    | C9(Carbamidomethyl); C10(Carb | 1 | 1 |
| [K].icAMEGLPQk.[H]     | N-Term(iTRAQ4plex); C2(Carbam | 1 | 1 |
| [R].tINPAVDHcck.[T]    | N-Term(iTRAQ4plex); C9(Carbam | 1 | 1 |
| [R].rLcFFYNk.[K]       | N-Term(iTRAQ4plex); C3(Carbam | 1 | 1 |
| [K].qDSISSk.[I]        | N-Term(iTRAQ4plex); K7(iTRAQ4 | 1 | 1 |
| [R].lcFFYNk.[K]        | N-Term(iTRAQ4plex); C2(Carbam | 1 | 1 |
| [K].hVcGALLk.[F]       | N-Term(iTRAQ4plex); C3(Carbam | 1 | 1 |
| [R].fLVNLVl.[L]        | N-Term(iTRAQ4plex); K7(iTRAQ4 | 1 | 1 |
| [K].vMNHlcSk.[Q]       | N-Term(iTRAQ4plex); C6(Carbam | 1 | 1 |
| [R].fLVNLVl.[L]        | N-Term(iTRAQ4plex); K7(iTRAQ4 | 1 | 1 |
| [K].vmNHlcSk.[Q]       | N-Term(iTRAQ4plex); M2(Oxidat | 1 | 1 |
| [R].rPcFESLk.[A]       | N-Term(iTRAQ4plex); C3(Carbam | 1 | 1 |
| [K].aFSSYQk.[H]        | N-Term(iTRAQ4plex); K7(iTRAQ4 | 1 | 1 |
| [R].gQcIINSNk.[D]      | N-Term(iTRAQ4plex); C3(Carbam | 1 | 1 |
| [K].vMNHlcSk.[Q]       | N-Term(iTRAQ4plex); C6(Carbam | 1 | 1 |
| [R].RHPDLSIPELLR.[I]   |                               | 1 | 1 |
| [R].dADPDTFFAk.[F]     | N-Term(iTRAQ4plex); K10(iTRAQ | 1 | 1 |
| [K].hFQNLGk.[D]        | N-Term(iTRAQ4plex); K7(iTRAQ4 | 1 | 1 |
| [K].hFQNLGk.[D]        | N-Term(iTRAQ4plex); K7(iTRAQ4 | 1 | 1 |
| [K].hVcGALLk.[F]       | N-Term(iTRAQ4plex); C3(Carbam | 1 | 1 |
| [K].hVcGALLk.[F]       | N-Term(iTRAQ4plex); C3(Carbam | 1 | 1 |
| [K].vMNHlcSk.[Q]       | N-Term(iTRAQ4plex); C6(Carbam | 1 | 1 |
| [K].qDSISSk.[I]        | N-Term(iTRAQ4plex); K7(iTRAQ4 | 1 | 1 |
| [K].IPNNVLQEk.[I]      | N-Term(iTRAQ4plex); K9(iTRAQ4 | 1 | 1 |
| [R].aIPVTQYLk.[A]      | N-Term(iTRAQ4plex); K9(iTRAQ4 | 1 | 1 |
| [K].IPNNVLQEk.[I]      | N-Term(iTRAQ4plex); K9(iTRAQ4 | 1 | 1 |
| [K].vmNHlcSk.[Q]       | N-Term(iTRAQ4plex); M2(Oxidat | 1 | 1 |
| [R].DADPDTFFAk.[F]     | K10(iTRAQ4plex)               | 1 | 1 |
| [K].hVcGALLk.[F]       | N-Term(iTRAQ4plex); C3(Carbam | 1 | 1 |
| [K].hFQNLGk.[D]        | N-Term(iTRAQ4plex); K7(iTRAQ4 | 1 | 1 |
| [R].tINPAVDHcck.[T]    | N-Term(iTRAQ4plex); C9(Carbam | 1 | 1 |
| [K].hFQNLGk.[D]        | N-Term(iTRAQ4plex); K7(iTRAQ4 | 1 | 1 |



|                                    |                                          |   |   |
|------------------------------------|------------------------------------------|---|---|
| [R].dIPTNSPELEETLHTITk.[L]         | N-Term(iTRAQ4plex); K19(iTRAQ4plex)      | 1 | 1 |
| [R].DIPTNSPELEETLHTITk.[L]         | K19(iTRAQ4plex)                          | 1 | 1 |
| [K].kYFIDFVAR.[E]                  | N-Term(iTRAQ4plex); K1(iTRAQ4plex)       | 1 | 1 |
| [K].kYFIDFVAR.[E]                  | N-Term(iTRAQ4plex); K1(iTRAQ4plex)       | 1 | 1 |
| [K].kYNSQNSNNQFVLYR.[I]            | N-Term(iTRAQ4plex); K1(iTRAQ4plex)       | 1 | 1 |
| [K].kYNSQNSNNQFVLYR.[I]            | N-Term(iTRAQ4plex); K1(iTRAQ4plex)       | 1 | 1 |
| [K].yNSQNSNNQFVLYR.[I]             | N-Term(iTRAQ4plex)                       | 1 | 1 |
| [K].yNSQNSNNQFVLYR.[I]             | N-Term(iTRAQ4plex)                       | 1 | 1 |
| [K].aVDAALk.[K]                    | N-Term(iTRAQ4plex); K7(iTRAQ4plex)       | 1 | 1 |
| [R].vQVVAGk.[K]                    | N-Term(iTRAQ4plex); K7(iTRAQ4plex)       | 1 | 1 |
| [R].qVVAGLNFR.[I]                  | N-Term(iTRAQ4plex)                       | 1 | 1 |
| [R].qVVAGLNFR.[I]                  | N-Term(iTRAQ4plex)                       | 1 | 1 |
| [K].rPPGFSPFR.[S]                  | N-Term(iTRAQ4plex)                       | 1 | 1 |
| [K].rPPGFSPFR.[S]                  | N-Term(iTRAQ4plex)                       | 1 | 1 |
| [K].rPPGFSPFR.[S]                  | N-Term(iTRAQ4plex)                       | 1 | 1 |
| [K].rPPGFSPFR.[S]                  | N-Term(iTRAQ4plex)                       | 1 | 1 |
| [R].iASFSQNCdIYPGk.[D]             | N-Term(iTRAQ4plex); C8(Carbamidomethyl)  | 1 | 1 |
| [R].iASFSQNCdIYPGk.[D]             | N-Term(iTRAQ4plex); C8(Carbamidomethyl)  | 1 | 1 |
| [R].iASFSQNCdIYPGk.[D]             | N-Term(iTRAQ4plex); C8(Carbamidomethyl)  | 1 | 1 |
| [K].aATGEcTATVGk.[S]               | N-Term(iTRAQ4plex); C6(Carbamidomethyl)  | 1 | 1 |
| [R].iASFSQNCdIYPGk.[D]             | N-Term(iTRAQ4plex); C8(Carbamidomethyl)  | 1 | 1 |
| [K].tVGSDFYSfk.[Y]                 | N-Term(iTRAQ4plex); K11(iTRAQ4plex)      | 1 | 1 |
| [K].tVGSDFYSfk.[Y]                 | N-Term(iTRAQ4plex); K11(iTRAQ4plex)      | 1 | 1 |
| [R].iASFSQNCdIYPGk.[D]             | N-Term(iTRAQ4plex); C8(Carbamidomethyl)  | 1 | 1 |
| [K].IGQSLDcNAEVYVWPWEk.[K]         | N-Term(iTRAQ4plex); C7(Carbamidomethyl)  | 1 | 1 |
| [K].IGQSLDcNAEVYVWPWEk.[K]         | N-Term(iTRAQ4plex); C7(Carbamidomethyl)  | 1 | 1 |
| [K].IGQSLDcNAEVYVWPWEk.[K]         | N-Term(iTRAQ4plex); C7(Carbamidomethyl)  | 1 | 1 |
| [K].IGQSLDcNAEVYVWPWEk.[K]         | N-Term(iTRAQ4plex); C7(Carbamidomethyl)  | 1 | 1 |
| [K].fSVATQcQTIPAEGPVVTAQYDcLGcVHPI | N-Term(iTRAQ4plex); C8(Carbamidomethyl)  | 1 | 1 |
| [K].kLGQSLDcNAEVYVWPWEk.[K]        | N-Term(iTRAQ4plex); C8(Carbamidomethyl)  | 1 | 1 |
| [K].kLGQSLDcNAEVYVWPWEk.[K]        | K1(iTRAQ4plex); C8(Carbamidomethyl)      | 1 | 1 |
| [K].kLGQSLDcNAEVYVWPWEk.[K]        | N-Term(iTRAQ4plex); K1(iTRAQ4plex)       | 1 | 1 |
| [K].kLGQSLDcNAEVYVWPWEk.[K]        | N-Term(iTRAQ4plex); K1(iTRAQ4plex)       | 1 | 1 |
| [K].eNFLFLTPDck.[S]                | N-Term(iTRAQ4plex); C10(Carbamidomethyl) | 1 | 1 |
| [K].eNFLFLTPDck.[S]                | N-Term(iTRAQ4plex); C10(Carbamidomethyl) | 1 | 1 |
| [K].eNFLFLTPDck.[S]                | N-Term(iTRAQ4plex); C10(Carbamidomethyl) | 1 | 1 |
| [K].kiYPTVncQPLGMISLMk.[R]         | N-Term(iTRAQ4plex); K1(iTRAQ4plex)       | 1 | 1 |
| [K].aVDAALkk.[Y]                   | N-Term(iTRAQ4plex); K7(iTRAQ4plex)       | 1 | 1 |
| [K].aATGEcTATVGk.[R]               | N-Term(iTRAQ4plex); C6(Carbamidomethyl)  | 1 | 1 |
| [K].aATGEcTATVGk.[R]               | N-Term(iTRAQ4plex); C6(Carbamidomethyl)  | 1 | 1 |
| [K].IDDDLEHQGGHVLHDHGhk.[H]        | N-Term(iTRAQ4plex); K18(iTRAQ4plex)      | 1 | 1 |
| [K].aATGEcTATVGk.[R]               | N-Term(iTRAQ4plex); C6(Carbamidomethyl)  | 1 | 1 |
| [K].aATGEcTATVGk.[R]               | N-Term(iTRAQ4plex); C6(Carbamidomethyl)  | 1 | 1 |
| [K].aATGEcTATVGk.[R]               | N-Term(iTRAQ4plex); C6(Carbamidomethyl)  | 1 | 1 |
| [K].aATGEcTATVGk.[R]               | N-Term(iTRAQ4plex); C6(Carbamidomethyl)  | 1 | 1 |
| [K].aATGEcTATVGk.[R]               | N-Term(iTRAQ4plex); C6(Carbamidomethyl)  | 1 | 1 |
| [K].IDDDLEHQGGHVLHDHGhk.[H]        | N-Term(iTRAQ4plex); K18(iTRAQ4plex)      | 1 | 1 |
| [K].iYPTVncQPLGMISLMk.[R]          | N-Term(iTRAQ4plex); C7(Carbamidomethyl)  | 1 | 1 |
| [K].aATGEcTATVGk.[R]               | N-Term(iTRAQ4plex); C6(Carbamidomethyl)  | 1 | 1 |
| [K].dFVQPPTk.[I]                   | N-Term(iTRAQ4plex); K8(iTRAQ4plex)       | 1 | 1 |
| [K].svSEINPTTQMk.[E]               | N-Term(iTRAQ4plex); K12(iTRAQ4plex)      | 1 | 1 |
| [K].eSNEELTEScETk.[K]              | N-Term(iTRAQ4plex); C10(Carbamidomethyl) | 1 | 1 |

|                              |                                |   |   |
|------------------------------|--------------------------------|---|---|
| [K].AATGEcTATVGk.[R]         | C6(Carbamidomethyl); K12(iTRA  | 1 | 1 |
| [K].fkLDDDLHQGGHVLHDHGhk.[H] | N-Term(iTRAQ4plex); K2(iTRAQ4  | 1 | 1 |
| [K].aVDAALkk.[Y]             | N-Term(iTRAQ4plex); K7(iTRAQ4  | 1 | 1 |
| [R].qVVAGLNFR.[I]            | N-Term(iTRAQ4plex)             | 1 | 1 |
| [R].vQVVAGk.[K]              | N-Term(iTRAQ4plex); K7(iTRAQ4  | 1 | 1 |
| [R].qVVAGLNFR.[I]            | N-Term(iTRAQ4plex)             | 1 | 1 |
| [K].aATGEcTATVGk.[R]         | N-Term(iTRAQ4plex); C6(Carbam  | 1 | 1 |
| [K].tWQDcEYk.[D]             | N-Term(iTRAQ4plex); C5(Carbam  | 1 | 1 |
| [K].AATGEcTATVGk.[R]         | C6(Carbamidomethyl); K12(iTRA  | 1 | 1 |
| [R].qVVAGLNFR.[I]            | N-Term(iTRAQ4plex)             | 1 | 1 |
| [K].LGQSLDcNAEVYVVPWEk.[K]   | C7(Carbamidomethyl); K18(iTRA  | 1 | 1 |
| [R].vQVVAGk.[K]              | N-Term(iTRAQ4plex); K7(iTRAQ4  | 1 | 1 |
| [R].vQVVAGk.[K]              | N-Term(iTRAQ4plex); K7(iTRAQ4  | 1 | 1 |
| [K].dFVQPPTk.[I]             | N-Term(iTRAQ4plex); K8(iTRAQ4  | 1 | 1 |
| [R].kHNLGHGHk.[H]            | N-Term(iTRAQ4plex); K1(iTRAQ4  | 1 | 1 |
| [R].iASFSQncDIYPGk.[D]       | N-Term(iTRAQ4plex); C8(Carbam  | 1 | 1 |
| [K].dFVQPPTk.[I]             | N-Term(iTRAQ4plex); K8(iTRAQ4  | 1 | 1 |
| [R].QVVAGLNFR.[I]            |                                | 1 | 1 |
| [K].TWQDcEYk.[D]             | C5(Carbamidomethyl); K8(iTRAC  | 1 | 1 |
| [K].ENFLFLTPDck.[S]          | C10(Carbamidomethyl); K11(iTR  | 1 | 1 |
| [R].qVVAGLNFR.[I]            | N-Term(iTRAQ4plex)             | 1 | 1 |
| [K].tWQDcEYk.[D]             | N-Term(iTRAQ4plex); C5(Carbam  | 1 | 1 |
| [R].vQVVAGk.[K]              | N-Term(iTRAQ4plex); K7(iTRAQ4  | 1 | 1 |
| [K].dFVQPPTk.[I]             | N-Term(iTRAQ4plex); K8(iTRAQ4  | 1 | 1 |
| [K].kLGQSLDcNAEVYVVPWEk.[K]  | N-Term(iTRAQ4plex); K1(iTRAQ4  | 1 | 1 |
| [K].IGQSLDcNAEVYVVPWEk.[K]   | N-Term(iTRAQ4plex); C7(Carbam  | 1 | 1 |
| [R].vQVVAGkk.[Y]             | N-Term(iTRAQ4plex); K7(iTRAQ4  | 1 | 1 |
| [K].kiYPTVNcQPLGMISLMk.[R]   | N-Term(iTRAQ4plex); K1(iTRAQ4  | 1 | 1 |
| [K].ENFLFLTPDck.[S]          | C10(Carbamidomethyl); K11(iTR  | 1 | 1 |
| [K].RPPGFSPFR.[S]            |                                | 1 | 1 |
| [R].vQVVAGk.[K]              | N-Term(iTRAQ4plex); K7(iTRAQ4  | 1 | 1 |
| [K].eNFLFLTPDck.[S]          | N-Term(iTRAQ4plex); C10(Carbar | 1 | 1 |
| [K].tVGSDFYSfk.[Y]           | N-Term(iTRAQ4plex); K11(iTRAQ  | 1 | 1 |
| [K].dFVQPPTk.[I]             | N-Term(iTRAQ4plex); K8(iTRAQ4  | 1 | 1 |
| [K].iYPTVNcQPLGMISLMk.[R]    | N-Term(iTRAQ4plex); C7(Carbam  | 1 | 1 |
| [K].rPPGFSPFR.[S]            | N-Term(iTRAQ4plex)             | 1 | 1 |
| [K].yNSQNSNNQFVLYR.[I]       | N-Term(iTRAQ4plex)             | 1 | 1 |
| [K].YFIDFVAR.[E]             |                                | 1 | 1 |
| [K].kyFIDFVAR.[E]            | N-Term(iTRAQ4plex); K1(iTRAQ4  | 1 | 1 |
| [K].eNFLFLTPDck.[S]          | N-Term(iTRAQ4plex); C10(Carbar | 1 | 1 |
| [R].rHWDWGHEk.[Q]            | N-Term(iTRAQ4plex); K8(iTRAQ4  | 1 | 1 |
| [K].dFVQPPTk.[I]             | N-Term(iTRAQ4plex); K8(iTRAQ4  | 1 | 1 |
| [R].vQVVAGk.[K]              | N-Term(iTRAQ4plex); K7(iTRAQ4  | 1 | 1 |
| [R].iASFSQncDIYPGk.[D]       | N-Term(iTRAQ4plex); C8(Carbam  | 1 | 1 |
| [K].IGQSLDcNAEVYVVPWEk.[K]   | N-Term(iTRAQ4plex); C7(Carbam  | 1 | 1 |
| [K].tVGSDFYSfk.[Y]           | N-Term(iTRAQ4plex); K11(iTRAQ  | 1 | 1 |
| [K].ENFLFLTPDck.[S]          | C10(Carbamidomethyl); K11(iTR  | 1 | 1 |
| [K].IGQSLDcNAEVYVVPWEk.[K]   | N-Term(iTRAQ4plex); C7(Carbam  | 1 | 1 |
| [K].dFVQPPTk.[I]             | N-Term(iTRAQ4plex); K8(iTRAQ4  | 1 | 1 |
| [K].yFIDFVAR.[E]             | N-Term(iTRAQ4plex)             | 1 | 1 |
| [R].iASFSQncDIYPGk.[D]       | N-Term(iTRAQ4plex); C8(Carbam  | 1 | 1 |
| [K].tVGSDFYSfk.[Y]           | N-Term(iTRAQ4plex); K11(iTRAQ  | 1 | 1 |



|                                |                               |   |   |
|--------------------------------|-------------------------------|---|---|
| [R].QVVAGLNFR.[I]              |                               | 1 | 1 |
| [K].dFVQPPTk.[I]               | N-Term(iTRAQ4plex); K8(iTRAQ4 | 1 | 1 |
| [R].iASFSQNCDIYPGk.[D]         | N-Term(iTRAQ4plex); C8(Carbam | 1 | 1 |
| [K].TVGSDFYSFk.[Y]             | K11(iTRAQ4plex)               | 1 | 1 |
| [K].hNLGHGHk.[H]               | N-Term(iTRAQ4plex); K8(iTRAQ4 | 1 | 1 |
| [K].kYFIDFVAR.[E]              | N-Term(iTRAQ4plex)            | 1 | 1 |
| [K].kYFIDFVAR.[E]              | K1(iTRAQ4plex)                | 1 | 1 |
| [K].TVGSDFYSFk.[Y]             | K11(iTRAQ4plex)               | 1 | 1 |
| [K].yFIDFVAR.[E]               | N-Term(iTRAQ4plex)            | 1 | 1 |
| [K].aVDAALK.[K]                | N-Term(iTRAQ4plex); K7(iTRAQ4 | 1 | 1 |
| [K].dFVQPPTk.[I]               | N-Term(iTRAQ4plex); K8(iTRAQ4 | 1 | 1 |
| [K].dFVQPPTk.[I]               | N-Term(iTRAQ4plex); K8(iTRAQ4 | 1 | 1 |
| [K].aVDAALK.[K]                | N-Term(iTRAQ4plex); K7(iTRAQ4 | 1 | 1 |
| [K].kYFIDFVAR.[E]              | N-Term(iTRAQ4plex)            | 1 | 1 |
| [K].kYFIDFVAR.[E]              | K1(iTRAQ4plex)                | 1 | 1 |
| [K].TWQDcEYk.[D]               | C5(Carbamidomethyl); K8(iTRAC | 1 | 1 |
| [K].TWQDcEYk.[D]               | C5(Carbamidomethyl); K8(iTRAC | 1 | 1 |
| [K].dFVQPPTk.[I]               | N-Term(iTRAQ4plex); K8(iTRAQ4 | 1 | 1 |
| [K].iYPTVNCQLGMISLmk.[R]       | N-Term(iTRAQ4plex); C7(Carbam | 1 | 1 |
| [R].iASFSQNCDIYPGk.[D]         | N-Term(iTRAQ4plex); C8(Carbam | 1 | 1 |
| [K].tVGSDFYSFk.[Y]             | N-Term(iTRAQ4plex); K11(iTRAQ | 1 | 1 |
| [K].tVGSDFYSFk.[Y]             | N-Term(iTRAQ4plex); K11(iTRAQ | 1 | 1 |
| [K].TWQDcEYk.[D]               | C5(Carbamidomethyl); K8(iTRAC | 1 | 1 |
| [K].iYPTVNCQLGMISLmk.[R]       | N-Term(iTRAQ4plex); C7(Carbam | 1 | 1 |
| [K].aVDAALK.[K]                | N-Term(iTRAQ4plex); K7(iTRAQ4 | 1 | 1 |
| [K].tWQDcEYk.[D]               | N-Term(iTRAQ4plex); C5(Carbam | 1 | 1 |
| [R].vQVVAGk.[K]                | N-Term(iTRAQ4plex); K7(iTRAQ4 | 1 | 1 |
| [K].TVGSDFYSFk.[Y]             | K11(iTRAQ4plex)               | 1 | 1 |
| [K].TVGSDFYSFk.[Y]             | K11(iTRAQ4plex)               | 1 | 1 |
| [R].vQVVAGk.[K]                | N-Term(iTRAQ4plex); K7(iTRAQ4 | 1 | 1 |
| [K].kYNSQNSNNQFVLYR.[I]        | N-Term(iTRAQ4plex); K1(iTRAQ4 | 1 | 1 |
| [K].TWQDcEYk.[D]               | C5(Carbamidomethyl); K8(iTRAC | 1 | 1 |
| [K].kLGQSLDcNAEVVVPWEk.[K]     | N-Term(iTRAQ4plex); K1(iTRAQ4 | 1 | 1 |
| [K].qTQVSVLPEGGETPLFk.[Q]      | N-Term(iTRAQ4plex); K17(iTRAQ | 1 | 1 |
| [K].qTQVSVLPEGGETPLFk.[Q]      | N-Term(iTRAQ4plex); K17(iTRAQ | 1 | 1 |
| [K].aGALNSNDAFVLk.[T]          | N-Term(iTRAQ4plex); K13(iTRAQ | 1 | 1 |
| [K].aGALNSNDAFVLk.[T]          | N-Term(iTRAQ4plex); K13(iTRAQ | 1 | 1 |
| [K].aGALNSNDAFVLk.[T]          | N-Term(iTRAQ4plex); K13(iTRAQ | 1 | 1 |
| [R].IFAcSNk.[I]                | N-Term(iTRAQ4plex); C4(Carbam | 1 | 1 |
| [R].aQPVQVAEGSEPDGFWEALGGk.[A] | N-Term(iTRAQ4plex); K22(iTRAQ | 1 | 1 |
| [R].aQPVQVAEGSEPDGFWEALGGk.[A] | N-Term(iTRAQ4plex); K22(iTRAQ | 1 | 1 |
| [R].aQPVQVAEGSEPDGFWEALGGk.[A] | N-Term(iTRAQ4plex); K22(iTRAQ | 1 | 1 |
| [R].aQPVQVAEGSEPDGFWEALGGk.[A] | N-Term(iTRAQ4plex); K22(iTRAQ | 1 | 1 |
| [K].kGGVASGFk.[H]              | N-Term(iTRAQ4plex); K1(iTRAQ4 | 1 | 1 |
| [R].aQPVQVAEGSEPDGFWEALGGk.[A] | N-Term(iTRAQ4plex); K22(iTRAQ | 1 | 1 |
| [R].aQPVQVAEGSEPDGFWEALGGk.[A] | N-Term(iTRAQ4plex); K22(iTRAQ | 1 | 1 |
| [R].aQPVQVAEGSEPDGFWEALGGk.[A] | N-Term(iTRAQ4plex); K22(iTRAQ | 1 | 1 |
| [R].aQPVQVAEGSEPDGFWEALGGk.[A] | N-Term(iTRAQ4plex); K22(iTRAQ | 1 | 1 |
| [R].aQPVQVAEGSEPDGFWEALGGk.[A] | N-Term(iTRAQ4plex); K22(iTRAQ | 1 | 1 |
| [R].aQPVQVAEGSEPDGFWEALGGk.[A] | N-Term(iTRAQ4plex); K22(iTRAQ | 1 | 1 |
| [R].aQPVQVAEGSEPDGFWEALGGk.[A] | N-Term(iTRAQ4plex); K22(iTRAQ | 1 | 1 |
| [R].AQPVQVAEGSEPDGFWEALGGk.[A] | K22(iTRAQ4plex)               | 1 | 1 |
| [K].kGGVASGFk.[H]              | N-Term(iTRAQ4plex); K1(iTRAQ4 | 1 | 1 |

|                                   |                               |   |   |
|-----------------------------------|-------------------------------|---|---|
| [K].nWRDPDQTDGLGLSYLSSHIANVER.[V] | N-Term(iTRAQ4plex)            | 1 | 1 |
| [K].nWRDPDQTDGLGLSYLSSHIANVER.[V] | N-Term(iTRAQ4plex)            | 1 | 1 |
| [K].aGkEPGLQIWR.[V]               | N-Term(iTRAQ4plex); K3(iTRAQ4 | 1 | 1 |
| [K].hVVPNEVVQR.[L]                | N-Term(iTRAQ4plex)            | 1 | 1 |
| [R].eVQGFESATFLGYfk.[S]           | N-Term(iTRAQ4plex); K15(iTRAQ | 1 | 1 |
| [R].eVQGFESATFLGYfk.[S]           | N-Term(iTRAQ4plex); K15(iTRAQ | 1 | 1 |
| [R].eVQGFESATFLGYfk.[S]           | N-Term(iTRAQ4plex); K15(iTRAQ | 1 | 1 |
| [K].tPSAAYLWVGTGASEAEk.[T]        | N-Term(iTRAQ4plex); K18(iTRAQ | 1 | 1 |
| [K].tPSAAYLWVGTGASEAEk.[T]        | N-Term(iTRAQ4plex); K18(iTRAQ | 1 | 1 |
| [K].tPSAAYLWVGTGASEAEk.[T]        | N-Term(iTRAQ4plex); K18(iTRAQ | 1 | 1 |
| [K].tPSAAYLWVGTGASEAEk.[T]        | N-Term(iTRAQ4plex); K18(iTRAQ | 1 | 1 |
| [K].tPSAAYLWVGTGASEAEk.[T]        | N-Term(iTRAQ4plex); K18(iTRAQ | 1 | 1 |
| [K].tPSAAYLWVGTGASEAEk.[T]        | N-Term(iTRAQ4plex); K18(iTRAQ | 1 | 1 |
| [R].dPDQTDGLGLSYLSSHIANVER.[V]    | N-Term(iTRAQ4plex)            | 1 | 1 |
| [R].eVQGFESATFLGYfk.[S]           | N-Term(iTRAQ4plex); K15(iTRAQ | 1 | 1 |
| [R].dPDQTDGLGLSYLSSHIANVER.[V]    | N-Term(iTRAQ4plex)            | 1 | 1 |
| [R].dPDQTDGLGLSYLSSHIANVER.[V]    | N-Term(iTRAQ4plex)            | 1 | 1 |
| [K].rYIETDPANR.[D]                | N-Term(iTRAQ4plex)            | 1 | 1 |
| [K].kMDAHPPR.[L]                  | N-Term(iTRAQ4plex); K1(iTRAQ4 | 1 | 1 |
| [K].tEALTSak.[R]                  | N-Term(iTRAQ4plex); K8(iTRAQ4 | 1 | 1 |
| [K].sEDcFILDHGk.[D]               | N-Term(iTRAQ4plex); C4(Carbam | 1 | 1 |
| [K].sEDcFILDHGk.[D]               | N-Term(iTRAQ4plex); C4(Carbam | 1 | 1 |
| [K].dSQEEekTEALTSak.[R]           | N-Term(iTRAQ4plex); K7(iTRAQ4 | 1 | 1 |
| [K].sEDcFILDHGk.[D]               | C4(Carbamidomethyl); K11(iTRA | 1 | 1 |
| [K].TASDFITk.[M]                  | K8(iTRAQ4plex)                | 1 | 1 |
| [K].fdLVVPVPTNLYGDFFTGDAYVILk.[T] | N-Term(iTRAQ4plex); K24(iTRAQ | 1 | 1 |
| [K].hVVPNEVVQR.[L]                | N-Term(iTRAQ4plex)            | 1 | 1 |
| [R].gASQAGAPQGR.[V]               | N-Term(iTRAQ4plex)            | 1 | 1 |
| [R].yIETDPANR.[D]                 | N-Term(iTRAQ4plex)            | 1 | 1 |
| [R].eGGQTAPASTR.[L]               | N-Term(iTRAQ4plex)            | 1 | 1 |
| [K].tASDFITk.[M]                  | N-Term(iTRAQ4plex); K8(iTRAQ4 | 1 | 1 |
| [K].tASDFITk.[M]                  | N-Term(iTRAQ4plex); K8(iTRAQ4 | 1 | 1 |
| [R].aQPVQVAEGSEPDGFWEALGGk.[A]    | N-Term(iTRAQ4plex); K22(iTRAQ | 1 | 1 |
| [R].aQPVQVAEGSEPDGFWEALGGk.[A]    | N-Term(iTRAQ4plex); K22(iTRAQ | 1 | 1 |
| [K].TGAQELLR.[V]                  |                               | 1 | 1 |
| [K].sEDcFILDHGk.[D]               | N-Term(iTRAQ4plex); C4(Carbam | 1 | 1 |
| [K].gGVASGFk.[H]                  | N-Term(iTRAQ4plex); K8(iTRAQ4 | 1 | 1 |
| [R].aQPVQVAEGSEPDGFWEALGGk.[A]    | N-Term(iTRAQ4plex); K22(iTRAQ | 1 | 1 |
| [R].eVQGFESATFLGYfk.[S]           | N-Term(iTRAQ4plex); K15(iTRAQ | 1 | 1 |
| [K].sEDcFILDHGk.[D]               | C4(Carbamidomethyl); K11(iTRA | 1 | 1 |
| [R].yIETDPANR.[D]                 | N-Term(iTRAQ4plex)            | 1 | 1 |
| [K].hVVPNEVVQR.[L]                | N-Term(iTRAQ4plex)            | 1 | 1 |
| [K].dSQEEekTEALTSak.[R]           | N-Term(iTRAQ4plex); K7(iTRAQ4 | 1 | 1 |
| [K].dSQEEek.[T]                   | N-Term(iTRAQ4plex); K7(iTRAQ4 | 1 | 1 |
| [K].kGGVASGFk.[H]                 | N-Term(iTRAQ4plex); K1(iTRAQ4 | 1 | 1 |
| [K].TEALTSak.[R]                  | K8(iTRAQ4plex)                | 1 | 1 |
| [R].rTPITVvk.[Q]                  | N-Term(iTRAQ4plex); K8(iTRAQ4 | 1 | 1 |
| [R].tPITVvk.[Q]                   | N-Term(iTRAQ4plex); K7(iTRAQ4 | 1 | 1 |
| [K].sEDcFILDHGk.[D]               | N-Term(iTRAQ4plex); C4(Carbam | 1 | 1 |
| [R].eGGQTAPASTR.[L]               | N-Term(iTRAQ4plex)            | 1 | 1 |
| [R].IkATQVSk.[G]                  | N-Term(iTRAQ4plex); K2(iTRAQ4 | 1 | 1 |
| [K].tGAQELLR.[V]                  | N-Term(iTRAQ4plex)            | 1 | 1 |

|                                |                               |   |   |
|--------------------------------|-------------------------------|---|---|
| [K].ePGLQIWR.[V]               | N-Term(iTRAQ4plex)            | 1 | 1 |
| [R].eGGQTAPASTR.[L]            | N-Term(iTRAQ4plex)            | 1 | 1 |
| [R].tPITVVk.[Q]                | N-Term(iTRAQ4plex); K7(iTRAQ4 | 1 | 1 |
| [K].aGkEPGLQIWR.[V]            | N-Term(iTRAQ4plex); K3(iTRAQ4 | 1 | 1 |
| [R].IFAcSNk.[I]                | N-Term(iTRAQ4plex); C4(Carbam | 1 | 1 |
| [K].mDAHPPR.[L]                | N-Term(iTRAQ4plex)            | 1 | 1 |
| [K].tASDFITk.[M]               | N-Term(iTRAQ4plex); K8(iTRAQ4 | 1 | 1 |
| [K].ePGLQIWR.[V]               | N-Term(iTRAQ4plex)            | 1 | 1 |
| [R].aVEVLPk.[A]                | N-Term(iTRAQ4plex); K7(iTRAQ4 | 1 | 1 |
| [K].TEALTSak.[R]               | K8(iTRAQ4plex)                | 1 | 1 |
| [R].aQPVQVAEGSEPDGFWEALGGk.[A] | N-Term(iTRAQ4plex); K22(iTRAQ | 1 | 1 |
| [R].tPITVVk.[Q]                | N-Term(iTRAQ4plex); K7(iTRAQ4 | 1 | 1 |
| [K].dSQEEek.[T]                | N-Term(iTRAQ4plex); K7(iTRAQ4 | 1 | 1 |
| [R].dYVSQFEGSALGk.[Q]          | N-Term(iTRAQ4plex); K13(iTRAQ | 1 | 1 |
| [R].dYVSQFEGSALGk.[Q]          | N-Term(iTRAQ4plex); K13(iTRAQ | 1 | 1 |
| [R].dYVSQFEGSALGk.[Q]          | N-Term(iTRAQ4plex); K13(iTRAQ | 1 | 1 |
| [R].AHVDALRTHLAPYSDELRR.[L]    |                               | 1 | 1 |
| [K].kWQEEMELYR.[Q]             | N-Term(iTRAQ4plex); K1(iTRAQ4 | 1 | 1 |
| [K].kWQEEMELYR.[Q]             | N-Term(iTRAQ4plex); K1(iTRAQ4 | 1 | 1 |
| [K].kWQEEMELYR.[Q]             | N-Term(iTRAQ4plex); K1(iTRAQ4 | 1 | 1 |
| [R].AHVDALRTHLAPYSDELRR.[Q]    |                               | 1 | 1 |
| [R].hFWQQDEPPQSPWDR.[V]        | N-Term(iTRAQ4plex)            | 1 | 1 |
| [R].hFWQQDEPPQSPWDR.[V]        | N-Term(iTRAQ4plex)            | 1 | 1 |
| [R].hFWQQDEPPQSPWDR.[V]        | N-Term(iTRAQ4plex)            | 1 | 1 |
| [R].dYVSQFEGSALGk.[Q]          | N-Term(iTRAQ4plex); K13(iTRAQ | 1 | 1 |
| [R].hFWQQDEPPQSPWDR.[V]        | N-Term(iTRAQ4plex)            | 1 | 1 |
| [R].hFWQQDEPPQSPWDR.[V]        | N-Term(iTRAQ4plex)            | 1 | 1 |
| [R].hFWQQDEPPQSPWDR.[V]        | N-Term(iTRAQ4plex)            | 1 | 1 |
| [R].hFWQQDEPPQSPWDR.[V]        | N-Term(iTRAQ4plex)            | 1 | 1 |
| [R].AHVDALRTHLAPYSDELRR.[Q]    |                               | 1 | 1 |
| [R].hFWQQDEPPQSPWDR.[V]        | N-Term(iTRAQ4plex)            | 1 | 1 |
| [K].vQPYLDDFQk.[K]             | N-Term(iTRAQ4plex); K10(iTRAQ | 1 | 1 |
| [K].vQPYLDDFQk.[K]             | N-Term(iTRAQ4plex); K10(iTRAQ | 1 | 1 |
| [K].vQPYLDDFQk.[K]             | N-Term(iTRAQ4plex); K10(iTRAQ | 1 | 1 |
| [R].HFWQQDEPPQSPWDR.[V]        |                               | 1 | 1 |
| [R].tHLAPYSDELRR.[Q]           | N-Term(iTRAQ4plex)            | 1 | 1 |
| [K].aTEHLSTLSEk.[A]            | N-Term(iTRAQ4plex); K11(iTRAQ | 1 | 1 |
| [R].tHLAPYSDELRR.[Q]           | N-Term(iTRAQ4plex)            | 1 | 1 |
| [R].tHLAPYSDELRR.[Q]           | N-Term(iTRAQ4plex)            | 1 | 1 |
| [K].akPALEDLR.[Q]              | N-Term(iTRAQ4plex); K2(iTRAQ4 | 1 | 1 |
| [R].QkVEPLRAELQEGAR.[Q]        | K2(iTRAQ4plex)                | 1 | 1 |
| [R].qKVEPLRAELQEGAR.[Q]        | N-Term(iTRAQ4plex)            | 1 | 1 |
| [R].tHLAPYSDELRR.[Q]           |                               | 1 | 1 |
| [K].DLATVYVDVlk.[D]            | K11(iTRAQ4plex)               | 1 | 1 |
| [R].eQLGPVTQEFWDNLEk.[E]       | N-Term(iTRAQ4plex); K16(iTRAQ | 1 | 1 |
| [K].dLATVYVDVlk.[D]            | N-Term(iTRAQ4plex); K11(iTRAQ | 1 | 1 |
| [K].dLATVYVDVlk.[D]            | N-Term(iTRAQ4plex); K11(iTRAQ | 1 | 1 |
| [K].dLATVYVDVlk.[D]            | N-Term(iTRAQ4plex); K11(iTRAQ | 1 | 1 |
| [K].dLATVYVDVlk.[D]            | N-Term(iTRAQ4plex); K11(iTRAQ | 1 | 1 |
| [K].dLATVYVDVlk.[D]            | N-Term(iTRAQ4plex); K11(iTRAQ | 1 | 1 |
| [R].eQLGPVTQEFWDNLEk.[E]       | N-Term(iTRAQ4plex); K16(iTRAQ | 1 | 1 |
| [R].eQLGPVTQEFWDNLEk.[E]       | N-Term(iTRAQ4plex); K16(iTRAQ | 1 | 1 |
| [R].eQLGPVTQEFWDNLEk.[E]       | N-Term(iTRAQ4plex); K16(iTRAQ | 1 | 1 |



|                            |                                     |   |   |
|----------------------------|-------------------------------------|---|---|
| [R].dYVSQFEGSALGk.[Q]      | N-Term(iTRAQ4plex); K13(iTRAQ4plex) | 1 | 1 |
| [R].dYVSQFEGSALGk.[Q]      | N-Term(iTRAQ4plex); K13(iTRAQ4plex) | 1 | 1 |
| [R].DYVSQFEGSALGk.[Q]      | K13(iTRAQ4plex)                     | 1 | 1 |
| [R].DYVSQFEGSALGk.[Q]      | K13(iTRAQ4plex)                     | 1 | 1 |
| [R].eQLGpvtQEFWDNLEk.[E]   | N-Term(iTRAQ4plex); K16(iTRAQ4plex) | 1 | 1 |
| [R].eQLGpvtQEFWDNLEk.[E]   | N-Term(iTRAQ4plex); K16(iTRAQ4plex) | 1 | 1 |
| [R].IAEYHak.[A]            | N-Term(iTRAQ4plex); K7(iTRAQ4plex)  | 1 | 1 |
| [R].EQLGpvtQEFWDNLEk.[E]   | K16(iTRAQ4plex)                     | 1 | 1 |
| [K].akPALEDLR.[Q]          | N-Term(iTRAQ4plex); K2(iTRAQ4plex)  | 1 | 1 |
| [K].akPALEDLR.[Q]          | N-Term(iTRAQ4plex); K2(iTRAQ4plex)  | 1 | 1 |
| [K].akPALEDLR.[Q]          | N-Term(iTRAQ4plex); K2(iTRAQ4plex)  | 1 | 1 |
| [K].aTEHLSTLSEk.[A]        | N-Term(iTRAQ4plex); K11(iTRAQ4plex) | 1 | 1 |
| [K].vSFLSALEEYtk.[K]       | N-Term(iTRAQ4plex); K12(iTRAQ4plex) | 1 | 1 |
| [K].vSFLSALEEYtk.[K]       | N-Term(iTRAQ4plex); K12(iTRAQ4plex) | 1 | 1 |
| [K].akPALEDLR.[Q]          | N-Term(iTRAQ4plex); K2(iTRAQ4plex)  | 1 | 1 |
| [K].akPALEDLR.[Q]          | N-Term(iTRAQ4plex); K2(iTRAQ4plex)  | 1 | 1 |
| [R].aELQEGAR.[Q]           | N-Term(iTRAQ4plex)                  | 1 | 1 |
| [K].vSFLSALEEYtk.[K]       | K12(iTRAQ4plex)                     | 1 | 1 |
| [R].thLAPYSDELr.[Q]        | N-Term(iTRAQ4plex)                  | 1 | 1 |
| [R].thLAPYSDELr.[Q]        |                                     | 1 | 1 |
| [K].LLDNWDSVTSTFSk.[L]     | K14(iTRAQ4plex)                     | 1 | 1 |
| [K].LLDNWDSVTSTFSk.[L]     | K14(iTRAQ4plex)                     | 1 | 1 |
| [K].dLATVYVDVlk.[D]        | N-Term(iTRAQ4plex); K11(iTRAQ4plex) | 1 | 1 |
| [K].dLATVYVDVlk.[D]        | N-Term(iTRAQ4plex); K11(iTRAQ4plex) | 1 | 1 |
| [K].ILDNWDSVTSTFSk.[L]     | N-Term(iTRAQ4plex); K14(iTRAQ4plex) | 1 | 1 |
| [K].ILDNWDSVTSTFSk.[L]     | N-Term(iTRAQ4plex); K14(iTRAQ4plex) | 1 | 1 |
| [K].ILDNWDSVTSTFSk.[L]     | N-Term(iTRAQ4plex); K14(iTRAQ4plex) | 1 | 1 |
| [R].vkDLATVYVDVlk.[D]      | N-Term(iTRAQ4plex); K2(iTRAQ4plex)  | 1 | 1 |
| [R].vkDLATVYVDVlk.[D]      | N-Term(iTRAQ4plex); K2(iTRAQ4plex)  | 1 | 1 |
| [R].vkDLATVYVDVlk.[D]      | N-Term(iTRAQ4plex); K2(iTRAQ4plex)  | 1 | 1 |
| [R].vkDLATVYVDVlk.[D]      | N-Term(iTRAQ4plex); K2(iTRAQ4plex)  | 1 | 1 |
| [R].vkDLATVYVDVlk.[D]      | N-Term(iTRAQ4plex); K2(iTRAQ4plex)  | 1 | 1 |
| [R].vkDLATVYVDVlk.[D]      | N-Term(iTRAQ4plex); K2(iTRAQ4plex)  | 1 | 1 |
| [K].ILDNWDSVTSTFSk.[L]     | N-Term(iTRAQ4plex); K14(iTRAQ4plex) | 1 | 1 |
| [K].ILDNWDSVTSTFSk.[L]     | N-Term(iTRAQ4plex); K14(iTRAQ4plex) | 1 | 1 |
| [K].ILDNWDSVTSTFSk.[L]     | N-Term(iTRAQ4plex); K14(iTRAQ4plex) | 1 | 1 |
| [K].aTEHLSTLSEk.[A]        | N-Term(iTRAQ4plex); K11(iTRAQ4plex) | 1 | 1 |
| [R].thLAPYSDELrQR.[L]      |                                     | 1 | 1 |
| [R].thLAPYSDELrQR.[L]      |                                     | 1 | 1 |
| [K].dLATVYVDVlk.[D]        | N-Term(iTRAQ4plex); K11(iTRAQ4plex) | 1 | 1 |
| [K].vSFLSALEEYtk.[K]       | N-Term(iTRAQ4plex); K12(iTRAQ4plex) | 1 | 1 |
| [K].vSFLSALEEYtk.[K]       | N-Term(iTRAQ4plex); K12(iTRAQ4plex) | 1 | 1 |
| [K].IREQLGpvtQEFWDNLEk.[E] | N-Term(iTRAQ4plex); K18(iTRAQ4plex) | 1 | 1 |
| [K].vSFLSALEEYtk.[K]       | N-Term(iTRAQ4plex); K12(iTRAQ4plex) | 1 | 1 |
| [K].vSFLSALEEYtk.[K]       | N-Term(iTRAQ4plex); K12(iTRAQ4plex) | 1 | 1 |
| [K].IREQLGpvtQEFWDNLEk.[E] | N-Term(iTRAQ4plex); K18(iTRAQ4plex) | 1 | 1 |
| [K].IREQLGpvtQEFWDNLEk.[E] | N-Term(iTRAQ4plex); K18(iTRAQ4plex) | 1 | 1 |
| [K].vSFLSALEEYtk.[K]       | N-Term(iTRAQ4plex); K12(iTRAQ4plex) | 1 | 1 |
| [K].vSFLSALEEYtk.[K]       | N-Term(iTRAQ4plex); K12(iTRAQ4plex) | 1 | 1 |
| [K].vSFLSALEEYtk.[K]       | K12(iTRAQ4plex)                     | 1 | 1 |
| [R].eQLGpvtQEFWDNLEk.[E]   | N-Term(iTRAQ4plex); K16(iTRAQ4plex) | 1 | 1 |
| [K].vSFLSALEEYtk.[K]       | N-Term(iTRAQ4plex); K12(iTRAQ4plex) | 1 | 1 |

|                          |                                     |   |   |
|--------------------------|-------------------------------------|---|---|
| [K].vSFLSALEEYTk.[K]     | N-Term(iTRAQ4plex); K12(iTRAQ4plex) | 1 | 1 |
| [K].vSFLSALEEYTk.[K]     | N-Term(iTRAQ4plex); K12(iTRAQ4plex) | 1 | 1 |
| [R].vkDLATVYVDVLk.[D]    | N-Term(iTRAQ4plex); K13(iTRAQ4plex) | 1 | 1 |
| [R].VkDLATVYVDVLk.[D]    | K2(iTRAQ4plex); K13(iTRAQ4plex)     | 1 | 1 |
| [R].eQLGPVTQEFWDNLEk.[E] | N-Term(iTRAQ4plex); K16(iTRAQ4plex) | 1 | 1 |
| [K].dLATVYVDVLk.[D]      | N-Term(iTRAQ4plex); K11(iTRAQ4plex) | 1 | 1 |
| [K].dLATVYVDVLk.[D]      | N-Term(iTRAQ4plex); K11(iTRAQ4plex) | 1 | 1 |
| [K].dLATVYVDVLk.[D]      | N-Term(iTRAQ4plex); K11(iTRAQ4plex) | 1 | 1 |
| [K].VSFLSALEEYTk.[K]     | K12(iTRAQ4plex)                     | 1 | 1 |
| [K].WQEEMELYR.[Q]        |                                     | 1 | 1 |
| [R].THLAPYSDELR.[Q]      |                                     | 1 | 1 |
| [R].THLAPYSDELR.[Q]      |                                     | 1 | 1 |
| [R].THLAPYSDELR.[Q]      |                                     | 1 | 1 |
| [R].THLAPYSDELR.[Q]      |                                     | 1 | 1 |
| [R].THLAPYSDELR.[Q]      |                                     | 1 | 1 |
| [R].qkLHELQEk.[L]        | N-Term(iTRAQ4plex); K2(iTRAQ4plex)  | 1 | 1 |
| [R].qkLHELQEk.[L]        | N-Term(iTRAQ4plex); K2(iTRAQ4plex)  | 1 | 1 |
| [R].vkDLATVYVDVLk.[D]    | N-Term(iTRAQ4plex); K2(iTRAQ4plex)  | 1 | 1 |
| [K].ILDNWDSVTSTFSk.[L]   | N-Term(iTRAQ4plex); K14(iTRAQ4plex) | 1 | 1 |
| [K].ILDNWDSVTSTFSk.[L]   | N-Term(iTRAQ4plex); K14(iTRAQ4plex) | 1 | 1 |
| [R].QGLLPVLESFk.[V]      | K11(iTRAQ4plex)                     | 1 | 1 |
| [K].aTEHLSTLSEk.[A]      | N-Term(iTRAQ4plex); K11(iTRAQ4plex) | 1 | 1 |
| [K].ILDNWDSVTSTFSk.[L]   | N-Term(iTRAQ4plex); K14(iTRAQ4plex) | 1 | 1 |
| [K].ILDNWDSVTSTFSk.[L]   | N-Term(iTRAQ4plex); K14(iTRAQ4plex) | 1 | 1 |
| [K].ILDNWDSVTSTFSk.[L]   | N-Term(iTRAQ4plex); K14(iTRAQ4plex) | 1 | 1 |
| [R].qGLLPVLESFk.[V]      | N-Term(iTRAQ4plex); K11(iTRAQ4plex) | 1 | 1 |
| [K].ILDNWDSVTSTFSk.[L]   | N-Term(iTRAQ4plex); K14(iTRAQ4plex) | 1 | 1 |
| [R].qGLLPVLESFk.[V]      | N-Term(iTRAQ4plex); K11(iTRAQ4plex) | 1 | 1 |
| [K].ILDNWDSVTSTFSk.[L]   | N-Term(iTRAQ4plex); K14(iTRAQ4plex) | 1 | 1 |
| [K].ILDNWDSVTSTFSk.[L]   | N-Term(iTRAQ4plex); K14(iTRAQ4plex) | 1 | 1 |
| [R].qGLLPVLESFk.[V]      | N-Term(iTRAQ4plex); K11(iTRAQ4plex) | 1 | 1 |
| [R].qGLLPVLESFk.[V]      | N-Term(iTRAQ4plex); K11(iTRAQ4plex) | 1 | 1 |
| [K].ILDNWDSVTSTFSk.[L]   | N-Term(iTRAQ4plex); K14(iTRAQ4plex) | 1 | 1 |
| [R].qGLLPVLESFk.[V]      | N-Term(iTRAQ4plex); K11(iTRAQ4plex) | 1 | 1 |
| [K].aTEHLSTLSEk.[A]      | N-Term(iTRAQ4plex); K11(iTRAQ4plex) | 1 | 1 |
| [K].aTEHLSTLSEk.[A]      | N-Term(iTRAQ4plex); K11(iTRAQ4plex) | 1 | 1 |
| [K].aTEHLSTLSEk.[A]      | N-Term(iTRAQ4plex); K11(iTRAQ4plex) | 1 | 1 |
| [K].ILDNWDSVTSTFSk.[L]   | N-Term(iTRAQ4plex); K14(iTRAQ4plex) | 1 | 1 |
| [K].ILDNWDSVTSTFSk.[L]   | N-Term(iTRAQ4plex); K14(iTRAQ4plex) | 1 | 1 |
| [R].qkLHELQEk.[L]        | N-Term(iTRAQ4plex); K2(iTRAQ4plex)  | 1 | 1 |
| [K].aTEHLSTLSEk.[A]      | N-Term(iTRAQ4plex); K11(iTRAQ4plex) | 1 | 1 |
| [K].aKPALEDLR.[Q]        | N-Term(iTRAQ4plex)                  | 1 | 1 |
| [K].AKPALEDLR.[Q]        | K2(iTRAQ4plex)                      | 1 | 1 |
| [R].tHLAPYSDELR.[Q]      | N-Term(iTRAQ4plex)                  | 1 | 1 |
| [R].THLAPYSDELR.[Q]      |                                     | 1 | 1 |
| [R].tHLAPYSDELR.[Q]      | N-Term(iTRAQ4plex)                  | 1 | 1 |
| [R].tHLAPYSDELR.[Q]      | N-Term(iTRAQ4plex)                  | 1 | 1 |
| [R].THLAPYSDELR.[Q]      |                                     | 1 | 1 |
| [R].THLAPYSDELR.[Q]      |                                     | 1 | 1 |
| [R].THLAPYSDELR.[Q]      |                                     | 1 | 1 |
| [R].tHLAPYSDELR.[Q]      | N-Term(iTRAQ4plex)                  | 1 | 1 |
| [R].THLAPYSDELR.[Q]      |                                     | 1 | 1 |

|                          |                                     |   |   |
|--------------------------|-------------------------------------|---|---|
| [R].tHLAPYSDEL.R.[Q]     | N-Term(iTRAQ4plex)                  | 1 | 1 |
| [R].tHLAPYSDEL.R.[Q]     | N-Term(iTRAQ4plex)                  | 1 | 1 |
| [R].tHLAPYSDEL.R.[Q]     | N-Term(iTRAQ4plex)                  | 1 | 1 |
| [R].tHLAPYSDEL.R.[Q]     | N-Term(iTRAQ4plex)                  | 1 | 1 |
| [R].tHLAPYSDEL.R.[Q]     | N-Term(iTRAQ4plex)                  | 1 | 1 |
| [R].tHLAPYSDEL.R.[Q]     | N-Term(iTRAQ4plex)                  | 1 | 1 |
| [R].tHLAPYSDEL.R.[Q]     | N-Term(iTRAQ4plex)                  | 1 | 1 |
| [K].aTEHLSTLSEk.[A]      | N-Term(iTRAQ4plex); K11(iTRAQ4plex) | 1 | 1 |
| [R].tHLAPYSDEL.R.[Q]     | N-Term(iTRAQ4plex)                  | 1 | 1 |
| [K].kWQEEMEL.YR.[Q]      | N-Term(iTRAQ4plex); K1(iTRAQ4plex)  | 1 | 1 |
| [K].kWQEEMEL.YR.[Q]      | N-Term(iTRAQ4plex); K1(iTRAQ4plex)  | 1 | 1 |
| [K].kWQEEMEL.YR.[Q]      | N-Term(iTRAQ4plex); K1(iTRAQ4plex)  | 1 | 1 |
| [K].kWQEEMEL.YR.[Q]      | N-Term(iTRAQ4plex); K1(iTRAQ4plex)  | 1 | 1 |
| [K].VQPYLDDFQk.[K]       | K10(iTRAQ4plex)                     | 1 | 1 |
| [K].kWQEEMEL.YR.[Q]      | N-Term(iTRAQ4plex); K1(iTRAQ4plex)  | 1 | 1 |
| [K].kWQEEMEL.YR.[Q]      | N-Term(iTRAQ4plex); K1(iTRAQ4plex)  | 1 | 1 |
| [K].kWQEEMEL.YR.[Q]      | N-Term(iTRAQ4plex); K1(iTRAQ4plex)  | 1 | 1 |
| [K].ISPLGEEMR.[D]        | N-Term(iTRAQ4plex)                  | 1 | 1 |
| [K].akPALEDL.R.[Q]       | N-Term(iTRAQ4plex); K2(iTRAQ4plex)  | 1 | 1 |
| [K].akPALEDL.R.[Q]       | N-Term(iTRAQ4plex); K2(iTRAQ4plex)  | 1 | 1 |
| [R].tHLAPYSDEL.R.[Q]     | N-Term(iTRAQ4plex)                  | 1 | 1 |
| [K].akPALEDL.R.[Q]       | N-Term(iTRAQ4plex); K2(iTRAQ4plex)  | 1 | 1 |
| [K].akPALEDL.R.[Q]       | N-Term(iTRAQ4plex); K2(iTRAQ4plex)  | 1 | 1 |
| [R].tHLAPYSDEL.R.[Q]     | N-Term(iTRAQ4plex)                  | 1 | 1 |
| [K].aTEHLSTLSEk.[A]      | N-Term(iTRAQ4plex); K11(iTRAQ4plex) | 1 | 1 |
| [R].qkVEPLRAELQEGAR.[Q]  | N-Term(iTRAQ4plex); K2(iTRAQ4plex)  | 1 | 1 |
| [R].aELQEGAR.[Q]         | N-Term(iTRAQ4plex)                  | 1 | 1 |
| [K].akPALEDL.R.[Q]       | N-Term(iTRAQ4plex); K2(iTRAQ4plex)  | 1 | 1 |
| [K].vQPYLDDFQk.[K]       | N-Term(iTRAQ4plex); K10(iTRAQ4plex) | 1 | 1 |
| [K].vQPYLDDFQk.[K]       | N-Term(iTRAQ4plex); K10(iTRAQ4plex) | 1 | 1 |
| [K].akPALEDL.R.[Q]       | N-Term(iTRAQ4plex); K2(iTRAQ4plex)  | 1 | 1 |
| [K].vQPYLDDFQk.[K]       | N-Term(iTRAQ4plex); K10(iTRAQ4plex) | 1 | 1 |
| [K].vQPYLDDFQk.[K]       | N-Term(iTRAQ4plex); K10(iTRAQ4plex) | 1 | 1 |
| [K].vQPYLDDFQk.[K]       | N-Term(iTRAQ4plex); K10(iTRAQ4plex) | 1 | 1 |
| [R].tHLAPYSDEL.R.[Q]     | N-Term(iTRAQ4plex)                  | 1 | 1 |
| [K].vQPYLDDFQk.[K]       | N-Term(iTRAQ4plex); K10(iTRAQ4plex) | 1 | 1 |
| [K].vEPLRAELQEGAR.[Q]    | N-Term(iTRAQ4plex)                  | 1 | 1 |
| [R].dYVSQFEGSALGk.[Q]    | N-Term(iTRAQ4plex); K13(iTRAQ4plex) | 1 | 1 |
| [R].tHLAPYSDEL.R.[Q]     | N-Term(iTRAQ4plex)                  | 1 | 1 |
| [R].tHLAPYSDEL.R.[Q]     | N-Term(iTRAQ4plex)                  | 1 | 1 |
| [R].tHLAPYSDEL.R.[Q]     | N-Term(iTRAQ4plex)                  | 1 | 1 |
| [K].aTEHLSTLSEk.[A]      | N-Term(iTRAQ4plex); K11(iTRAQ4plex) | 1 | 1 |
| [K].aTEHLSTLSEk.[A]      | N-Term(iTRAQ4plex); K11(iTRAQ4plex) | 1 | 1 |
| [K].aTEHLSTLSEk.[A]      | N-Term(iTRAQ4plex); K11(iTRAQ4plex) | 1 | 1 |
| [K].aTEHLSTLSEk.[A]      | N-Term(iTRAQ4plex); K11(iTRAQ4plex) | 1 | 1 |
| [R].aELQEGAR.[Q]         | N-Term(iTRAQ4plex)                  | 1 | 1 |
| [K].vQPYLDDFQk.[K]       | N-Term(iTRAQ4plex); K10(iTRAQ4plex) | 1 | 1 |
| [R].eQLGPVTQEFWDNLEK.[E] | N-Term(iTRAQ4plex)                  | 1 | 1 |
| [K].LSPLGEEMR.[D]        |                                     | 1 | 1 |
| [R].tHLAPYSDEL.R.[Q]     |                                     | 1 | 1 |
| [K].aTEHLSTLSEk.[A]      | N-Term(iTRAQ4plex); K11(iTRAQ4plex) | 1 | 1 |
| [R].hFWQQDEPPQSPWDR.[V]  | N-Term(iTRAQ4plex)                  | 1 | 1 |

|                              |                                     |   |   |
|------------------------------|-------------------------------------|---|---|
| [K].aTEHLSTLSEk.[A]          | N-Term(iTRAQ4plex); K11(iTRAQ4plex) | 1 | 1 |
| [R].DYVSQFEGSALGk.[Q]        | K13(iTRAQ4plex)                     | 1 | 1 |
| [R].qkLHELQEk.[L]            | N-Term(iTRAQ4plex); K2(iTRAQ4plex)  | 1 | 1 |
| [K].wQEEMELyR.[Q]            | N-Term(iTRAQ4plex)                  | 1 | 1 |
| [R].dYVSQFEGSALGk.[Q]        | N-Term(iTRAQ4plex); K13(iTRAQ4plex) | 1 | 1 |
| [R].THLAPYSDELr.[Q]          |                                     | 1 | 1 |
| [K].wQEEMELyR.[Q]            | N-Term(iTRAQ4plex)                  | 1 | 1 |
| [K].akPALEDLr.[Q]            | N-Term(iTRAQ4plex); K2(iTRAQ4plex)  | 1 | 1 |
| [R].THLAPYSDELr.[Q]          |                                     | 1 | 1 |
| [K].kWQEEMELyR.[Q]           | N-Term(iTRAQ4plex)                  | 1 | 1 |
| [K].kWQEEMELyR.[Q]           | K1(iTRAQ4plex)                      | 1 | 1 |
| [R].eQLGPVTQEFWDNLEk.[E]     | N-Term(iTRAQ4plex); K16(iTRAQ4plex) | 1 | 1 |
| [R].tHLAPYSDELr.[Q]          | N-Term(iTRAQ4plex)                  | 1 | 1 |
| [R].LAeyHak.[A]              | K7(iTRAQ4plex)                      | 1 | 1 |
| [R].aELQEGAR.[Q]             | N-Term(iTRAQ4plex)                  | 1 | 1 |
| [R].AHVDALRTHLAPYSDELrQR.[L] |                                     | 1 | 1 |
| [R].LAeyHak.[A]              | K7(iTRAQ4plex)                      | 1 | 1 |
| [K].wQEEMELyR.[Q]            | N-Term(iTRAQ4plex)                  | 1 | 1 |
| [K].kWQEEmELyR.[Q]           | N-Term(iTRAQ4plex); K1(iTRAQ4plex)  | 1 | 1 |
| [R].DYVSQFEGSALGk.[Q]        | K13(iTRAQ4plex)                     | 1 | 1 |
| [K].ISPLGEEMr.[D]            | N-Term(iTRAQ4plex)                  | 1 | 1 |
| [R].THLAPYSDELr.[Q]          |                                     | 1 | 1 |
| [R].THLAPYSDELr.[Q]          |                                     | 1 | 1 |
| [K].vePLRAELQEGAR.[Q]        | N-Term(iTRAQ4plex)                  | 1 | 1 |
| [R].tHLAPYSDELr.[Q]          | N-Term(iTRAQ4plex)                  | 1 | 1 |
| [R].eQLGPVTQEFWDNLEk.[E]     | N-Term(iTRAQ4plex); K16(iTRAQ4plex) | 1 | 1 |
| [R].aELQEGAR.[Q]             | N-Term(iTRAQ4plex)                  | 1 | 1 |
| [K].ILDNWDSVTSTFSk.[L]       | N-Term(iTRAQ4plex); K14(iTRAQ4plex) | 1 | 1 |
| [K].vQPYLDDFQk.[K]           | N-Term(iTRAQ4plex); K10(iTRAQ4plex) | 1 | 1 |
| [R].aELQEGAR.[Q]             | N-Term(iTRAQ4plex)                  | 1 | 1 |
| [K].ILDNWDSVTSTFSk.[L]       | N-Term(iTRAQ4plex); K14(iTRAQ4plex) | 1 | 1 |
| [R].aHVDALRTHLAPYSDELr.[Q]   | N-Term(iTRAQ4plex)                  | 1 | 1 |
| [R].eQLGPVTQEFWDNLEk.[E]     | N-Term(iTRAQ4plex); K16(iTRAQ4plex) | 1 | 1 |
| [K].wQEEMELyR.[Q]            | N-Term(iTRAQ4plex)                  | 1 | 1 |
| [K].vQPYLDDFQk.[K]           | N-Term(iTRAQ4plex)                  | 1 | 1 |
| [R].tHLAPYSDELrQR.[L]        | N-Term(iTRAQ4plex)                  | 1 | 1 |
| [R].aELQEGAR.[Q]             | N-Term(iTRAQ4plex)                  | 1 | 1 |
| [K].wQEEMELyR.[Q]            | N-Term(iTRAQ4plex)                  | 1 | 1 |
| [K].akPALEDLr.[Q]            | N-Term(iTRAQ4plex); K2(iTRAQ4plex)  | 1 | 1 |
| [R].qkLHELQEk.[L]            | N-Term(iTRAQ4plex); K2(iTRAQ4plex)  | 1 | 1 |
| [R].dYVSQFEGSALGk.[Q]        | N-Term(iTRAQ4plex); K13(iTRAQ4plex) | 1 | 1 |
| [R].aELQEGAR.[Q]             | N-Term(iTRAQ4plex)                  | 1 | 1 |
| [R].aELQEGAR.[Q]             | N-Term(iTRAQ4plex)                  | 1 | 1 |
| [K].vQPYLDDFQk.[K]           | N-Term(iTRAQ4plex); K10(iTRAQ4plex) | 1 | 1 |
| [K].dLATVYVDVlk.[D]          | N-Term(iTRAQ4plex); K11(iTRAQ4plex) | 1 | 1 |
| [R].THLAPYSDELr.[Q]          |                                     | 1 | 1 |
| [R].tHLAPYSDELr.[Q]          | N-Term(iTRAQ4plex)                  | 1 | 1 |
| [K].vQPYLDDFQk.[K]           | N-Term(iTRAQ4plex); K10(iTRAQ4plex) | 1 | 1 |
| [R].aELQEGAR.[Q]             | N-Term(iTRAQ4plex)                  | 1 | 1 |
| [R].tHLAPYSDELr.[Q]          | N-Term(iTRAQ4plex)                  | 1 | 1 |
| [K].ISPLGEEMr.[D]            | N-Term(iTRAQ4plex)                  | 1 | 1 |
| [R].aELQEGAR.[Q]             | N-Term(iTRAQ4plex)                  | 1 | 1 |



|                          |                               |   |   |
|--------------------------|-------------------------------|---|---|
| [R].ARAHVDALR.[T]        |                               | 1 | 1 |
| [K].IHELQEk.[L]          | N-Term(iTRAQ4plex); K7(iTRAQ4 | 1 | 1 |
| [R].DYVSQFEGSALGk.[Q]    | K13(iTRAQ4plex)               | 1 | 1 |
| [R].qKVEPLRAELQEGAR.[Q]  | N-Term(iTRAQ4plex)            | 1 | 1 |
| [R].thLAPYSDELQR.[L]     | N-Term(iTRAQ4plex)            | 1 | 1 |
| [K].IHELQEk.[L]          | N-Term(iTRAQ4plex); K7(iTRAQ4 | 1 | 1 |
| [R].eQLGPVTQEFWDNLEk.[E] | N-Term(iTRAQ4plex); K16(iTRAQ | 1 | 1 |
| [K].dLATVYVDVlk.[D]      | N-Term(iTRAQ4plex); K11(iTRAQ | 1 | 1 |
| [R].eQLGPVTQEFWDNLEk.[E] | N-Term(iTRAQ4plex); K16(iTRAQ | 1 | 1 |
| [R].EQLGPVTQEFWDNLEk.[E] | K16(iTRAQ4plex)               | 1 | 1 |
| [R].aELQEGAR.[Q]         | N-Term(iTRAQ4plex)            | 1 | 1 |
| [R].THLAPYSDELQ.[Q]      |                               | 1 | 1 |
| [K].ILDNWDSVTSTFSk.[L]   | N-Term(iTRAQ4plex); K14(iTRAQ | 1 | 1 |
| [R].IAEYHak.[A]          | N-Term(iTRAQ4plex); K7(iTRAQ4 | 1 | 1 |
| [R].THLAPYSDELQ.[Q]      |                               | 1 | 1 |
| [R].thLAPYSDELQ.[Q]      | N-Term(iTRAQ4plex)            | 1 | 1 |
| [R].HFWQQDEPPQSPWDR.[V]  |                               | 1 | 1 |
| [R].THLAPYSDELQ.[Q]      |                               | 1 | 1 |
| [K].wQEEMELyR.[Q]        | N-Term(iTRAQ4plex)            | 1 | 1 |
| [R].IEALKENGGAR.[L]      | N-Term(iTRAQ4plex); K5(iTRAQ4 | 1 | 1 |
| [K].kWQEEMELyR.[Q]       | N-Term(iTRAQ4plex); K1(iTRAQ4 | 1 | 1 |
| [R].IAEYHak.[A]          | N-Term(iTRAQ4plex); K7(iTRAQ4 | 1 | 1 |
| [R].qKLHELQEk.[L]        | N-Term(iTRAQ4plex); K9(iTRAQ4 | 1 | 1 |
| [K].LSPLGEEMR.[D]        |                               | 1 | 1 |
| [R].dYVSQFEGSALGk.[Q]    | N-Term(iTRAQ4plex); K13(iTRAQ | 1 | 1 |
| [R].IAEYHak.[A]          | N-Term(iTRAQ4plex); K7(iTRAQ4 | 1 | 1 |
| [K].kWQEEMELyR.[Q]       | N-Term(iTRAQ4plex); K1(iTRAQ4 | 1 | 1 |
| [K].LSPLGEEmR.[D]        | M8(Oxidation)                 | 1 | 1 |
| [K].WQEEmELyR.[Q]        | M5(Oxidation)                 | 1 | 1 |
| [K].ILDNWDSVTSTFSk.[L]   | N-Term(iTRAQ4plex); K14(iTRAQ | 1 | 1 |
| [K].vSFLSALEEYtk.[K]     | N-Term(iTRAQ4plex); K12(iTRAQ | 1 | 1 |
| [K].ISPLGEEMRDR.[A]      | N-Term(iTRAQ4plex)            | 1 | 1 |
| [R].eQLGPVTQEFWDNLEk.[E] | N-Term(iTRAQ4plex); K16(iTRAQ | 1 | 1 |
| [R].THLAPYSDELQ.[Q]      |                               | 1 | 1 |
| [R].LEALKENGGAR.[L]      | K5(iTRAQ4plex)                | 1 | 1 |
| [R].eQLGPVTQEFWDNLEk.[E] | N-Term(iTRAQ4plex); K16(iTRAQ | 1 | 1 |
| [K].akPALEDLR.[Q]        | N-Term(iTRAQ4plex); K2(iTRAQ4 | 1 | 1 |
| [K].wQEEmELyR.[Q]        | N-Term(iTRAQ4plex); M5(Oxidat | 1 | 1 |
| [R].eQLGPVTQEFWDNLEk.[E] | N-Term(iTRAQ4plex); K16(iTRAQ | 1 | 1 |
| [K].ILDNWDSVTSTFSk.[L]   | N-Term(iTRAQ4plex); K14(iTRAQ | 1 | 1 |
| [K].LHELQEk.[L]          | K7(iTRAQ4plex)                | 1 | 1 |
| [R].THLAPYSDELQ.[Q]      |                               | 1 | 1 |
| [K].IHELQEk.[L]          | N-Term(iTRAQ4plex); K7(iTRAQ4 | 1 | 1 |
| [K].aTEHLSTLSEk.[A]      | N-Term(iTRAQ4plex); K11(iTRAQ | 1 | 1 |
| [R].thLAPYSDELQ.[Q]      | N-Term(iTRAQ4plex)            | 1 | 1 |
| [R].LAEYHak.[A]          | K7(iTRAQ4plex)                | 1 | 1 |
| [K].wQEEMELyR.[Q]        | N-Term(iTRAQ4plex)            | 1 | 1 |
| [K].kWQEEMELyR.[Q]       | N-Term(iTRAQ4plex); K1(iTRAQ4 | 1 | 1 |
| [R].dYVSQFEGSALGk.[Q]    | N-Term(iTRAQ4plex); K13(iTRAQ | 1 | 1 |
| [K].IHELQEk.[L]          | N-Term(iTRAQ4plex); K7(iTRAQ4 | 1 | 1 |
| [R].eQLGPVTQEFWDNLEk.[E] | N-Term(iTRAQ4plex); K16(iTRAQ | 1 | 1 |
| [R].EQLGPVTQEFWDNLEk.[E] | K16(iTRAQ4plex)               | 1 | 1 |

|                          |                                |   |   |
|--------------------------|--------------------------------|---|---|
| [R].dYVSQFEGSALGk.[Q]    | N-Term(iTRAQ4plex); K13(iTRAQ4 | 1 | 1 |
| [K].IHELQEk.[L]          | N-Term(iTRAQ4plex); K7(iTRAQ4  | 1 | 1 |
| [K].vQPYLDDFQk.[K]       | N-Term(iTRAQ4plex); K10(iTRAQ4 | 1 | 1 |
| [K].IHELQEk.[L]          | N-Term(iTRAQ4plex); K7(iTRAQ4  | 1 | 1 |
| [R].tHLAPYSDELr.[Q]      | N-Term(iTRAQ4plex)             | 1 | 1 |
| [R].aELQEGAR.[Q]         | N-Term(iTRAQ4plex)             | 1 | 1 |
| [K].IHELQEk.[L]          | N-Term(iTRAQ4plex); K7(iTRAQ4  | 1 | 1 |
| [K].IHELQEk.[L]          | N-Term(iTRAQ4plex); K7(iTRAQ4  | 1 | 1 |
| [K].vSFLSALEEYtk.[K]     | N-Term(iTRAQ4plex); K12(iTRAQ4 | 1 | 1 |
| [R].eQLGPVTQEFWDNLEk.[E] | N-Term(iTRAQ4plex)             | 1 | 1 |
| [K].ILDNWDSVTSTFSk.[L]   | N-Term(iTRAQ4plex); K14(iTRAQ4 | 1 | 1 |
| [K].ILDNWDSVTSTFSk.[L]   | N-Term(iTRAQ4plex); K14(iTRAQ4 | 1 | 1 |
| [R].LAEYHak.[A]          | K7(iTRAQ4plex)                 | 1 | 1 |
| [K].ATEHLSTLSEk.[A]      | K11(iTRAQ4plex)                | 1 | 1 |
| [K].ILDNWDSVTSTFSk.[L]   | N-Term(iTRAQ4plex); K14(iTRAQ4 | 1 | 1 |
| [R].qGLLPVLESFk.[V]      | N-Term(iTRAQ4plex)             | 1 | 1 |
| [K].vQPYLDDFQk.[K]       | N-Term(iTRAQ4plex); K10(iTRAQ4 | 1 | 1 |
| [K].dLATVYVDVLKDSGR.[D]  | N-Term(iTRAQ4plex)             | 1 | 1 |
| [K].dLATVYVDVLK.[D]      | N-Term(iTRAQ4plex)             | 1 | 1 |
| [K].kWQEEmELYR.[Q]       | N-Term(iTRAQ4plex); K1(iTRAQ4  | 1 | 1 |
| [K].ILDNWDSVTSTFSk.[L]   | N-Term(iTRAQ4plex); K14(iTRAQ4 | 1 | 1 |
| [K].IHELQEk.[L]          | N-Term(iTRAQ4plex); K7(iTRAQ4  | 1 | 1 |
| [K].vQPYLDDFQk.[K]       | N-Term(iTRAQ4plex); K10(iTRAQ4 | 1 | 1 |
| [R].aELQEGAR.[Q]         | N-Term(iTRAQ4plex)             | 1 | 1 |
| [K].vSFLSALEEYtk.[K]     | K12(iTRAQ4plex)                | 1 | 1 |
| [R].aELQEGAR.[Q]         | N-Term(iTRAQ4plex)             | 1 | 1 |
| [R].THLAPYSDELrQR.[L]    |                                | 1 | 1 |
| [K].akPALEDLr.[Q]        | N-Term(iTRAQ4plex); K2(iTRAQ4  | 1 | 1 |
| [R].AELQEGAR.[Q]         |                                | 1 | 1 |
| [K].ILDNWDSVTSTFSk.[L]   | N-Term(iTRAQ4plex); K14(iTRAQ4 | 1 | 1 |
| [R].aELQEGAR.[Q]         | N-Term(iTRAQ4plex)             | 1 | 1 |
| [K].ILDNWDSVTSTFSk.[L]   | N-Term(iTRAQ4plex); K14(iTRAQ4 | 1 | 1 |
| [R].qKLHELQEk.[L]        | N-Term(iTRAQ4plex); K2(iTRAQ4  | 1 | 1 |
| [R].THLAPYSDELr.[Q]      |                                | 1 | 1 |
| [R].THLAPYSDELr.[Q]      |                                | 1 | 1 |
| [R].IEALKENGGAR.[L]      | N-Term(iTRAQ4plex); K5(iTRAQ4  | 1 | 1 |
| [R].eQLGPVTQEFWDNLEk.[E] | N-Term(iTRAQ4plex); K16(iTRAQ4 | 1 | 1 |
| [R].EQLGPVTQEFWDNLEk.[E] | K16(iTRAQ4plex)                | 1 | 1 |
| [R].dYVSQFEGSALGk.[Q]    | N-Term(iTRAQ4plex); K13(iTRAQ4 | 1 | 1 |
| [K].IHELQEk.[L]          | N-Term(iTRAQ4plex); K7(iTRAQ4  | 1 | 1 |
| [R].dYVSQFEGSALGk.[Q]    | N-Term(iTRAQ4plex); K13(iTRAQ4 | 1 | 1 |
| [K].akPALEDLr.[Q]        | N-Term(iTRAQ4plex); K2(iTRAQ4  | 1 | 1 |
| [R].AELQEGAR.[Q]         |                                | 1 | 1 |
| [K].vQPYLDDFQk.[K]       | N-Term(iTRAQ4plex); K10(iTRAQ4 | 1 | 1 |
| [K].IHELQEk.[L]          | N-Term(iTRAQ4plex); K7(iTRAQ4  | 1 | 1 |
| [K].IHELQEk.[L]          | N-Term(iTRAQ4plex); K7(iTRAQ4  | 1 | 1 |
| [K].kWQEEmELYR.[Q]       | N-Term(iTRAQ4plex); K1(iTRAQ4  | 1 | 1 |
| [R].QGLLPVLESFk.[V]      | K11(iTRAQ4plex)                | 1 | 1 |
| [R].qKLHELQEk.[L]        | N-Term(iTRAQ4plex); K9(iTRAQ4  | 1 | 1 |
| [R].QKLHELQEk.[L]        | K2(iTRAQ4plex); K9(iTRAQ4plex) | 1 | 1 |
| [K].ISPLGEEMR.[D]        | N-Term(iTRAQ4plex)             | 1 | 1 |
| [K].vQPYLDDFQk.[K]       | N-Term(iTRAQ4plex); K10(iTRAQ4 | 1 | 1 |

|                               |                               |   |   |
|-------------------------------|-------------------------------|---|---|
| [R].IAEYHAK.[A]               | N-Term(iTRAQ4plex); K7(iTRAQ4 | 1 | 1 |
| [R].VKDLATVYVDVLk.[D]         | K2(iTRAQ4plex); K13(iTRAQ4ple | 1 | 1 |
| [R].vKDLATVYVDVLk.[D]         | N-Term(iTRAQ4plex); K13(iTRAQ | 1 | 1 |
| [R].LAEYHAK.[A]               | K7(iTRAQ4plex)                | 1 | 1 |
| [K].dLEEYkAk.[V]              | N-Term(iTRAQ4plex); K6(iTRAQ4 | 1 | 1 |
| [R].THLAPYSDEL.R.[Q]          |                               | 1 | 1 |
| [R].dYVSQFEGSALGk.[Q]         | N-Term(iTRAQ4plex); K13(iTRAQ | 1 | 1 |
| [R].qGLLPVLESFk.[V]           | N-Term(iTRAQ4plex); K11(iTRAQ | 1 | 1 |
| [R].THLAPYSDEL.R.[Q]          |                               | 1 | 1 |
| [K].vQPYLDDFQk.[K]            | N-Term(iTRAQ4plex); K10(iTRAQ | 1 | 1 |
| [K].vSFLSALEEYTk.[K]          | N-Term(iTRAQ4plex); K12(iTRAQ | 1 | 1 |
| [K].aKVQPYLDDFQk.[K]          | N-Term(iTRAQ4plex); K12(iTRAQ | 1 | 1 |
| [K].AKVQPYLDDFQk.[K]          | K2(iTRAQ4plex); K12(iTRAQ4ple | 1 | 1 |
| [K].VSFLSALEEYTk.[K]          | K12(iTRAQ4plex)               | 1 | 1 |
| [K].IHELQEk.[L]               | N-Term(iTRAQ4plex); K7(iTRAQ4 | 1 | 1 |
| [R].dYVSQFEGSALGk.[Q]         | N-Term(iTRAQ4plex); K13(iTRAQ | 1 | 1 |
| [R].qkLHELQEk.[L]             | N-Term(iTRAQ4plex); K2(iTRAQ4 | 1 | 1 |
| [R].qGLLPVLESFk.[V]           | N-Term(iTRAQ4plex); K11(iTRAQ | 1 | 1 |
| [K].DLATVYVDVLk.[D]           | K11(iTRAQ4plex)               | 1 | 1 |
| [R].IAEYHAK.[A]               | N-Term(iTRAQ4plex); K7(iTRAQ4 | 1 | 1 |
| [R].dYVSQFEGSALGk.[Q]         | N-Term(iTRAQ4plex); K13(iTRAQ | 1 | 1 |
| [K].IHELQEk.[L]               | N-Term(iTRAQ4plex); K7(iTRAQ4 | 1 | 1 |
| [K].LLDNWDSVTSTFSk.[L]        | K14(iTRAQ4plex)               | 1 | 1 |
| [R].LEALKENGGAR.[L]           | K5(iTRAQ4plex)                | 1 | 1 |
| [K].VQPYLDDFQk.[K]            | K10(iTRAQ4plex)               | 1 | 1 |
| [R].EQLGpVTQEFWDNLEk.[E]      | K16(iTRAQ4plex)               | 1 | 1 |
| [K].vSFLSALEEYTK.[K]          | N-Term(iTRAQ4plex)            | 1 | 1 |
| [R].qkLHELQEk.[L]             | N-Term(iTRAQ4plex); K2(iTRAQ4 | 1 | 1 |
| [R].aELQEGAR.[Q]              | N-Term(iTRAQ4plex)            | 1 | 1 |
| [R].dYVSQFEGSALGk.[Q]         | N-Term(iTRAQ4plex); K13(iTRAQ | 1 | 1 |
| [K].IHELQEk.[L]               | N-Term(iTRAQ4plex); K7(iTRAQ4 | 1 | 1 |
| [K].vQPYLDDFQk.[K]            | N-Term(iTRAQ4plex); K10(iTRAQ | 1 | 1 |
| [K].IHELQEk.[L]               | N-Term(iTRAQ4plex); K7(iTRAQ4 | 1 | 1 |
| [K].ILDNWDSVTSTFSk.[L]        | N-Term(iTRAQ4plex); K14(iTRAQ | 1 | 1 |
| [R].dYVSQFEGSALGk.[Q]         | N-Term(iTRAQ4plex); K13(iTRAQ | 1 | 1 |
| [R].AHVDALRTHLAPYSDEL.RQR.[L] |                               | 1 | 1 |
| [R].qkLHELQEk.[L]             | N-Term(iTRAQ4plex); K2(iTRAQ4 | 1 | 1 |
| [K].LSPLGEEMR.[D]             |                               | 1 | 1 |
| [K].kWQEEMELYR.[Q]            | N-Term(iTRAQ4plex); K1(iTRAQ4 | 1 | 1 |
| [K].vQPYLDDFQk.[K]            | N-Term(iTRAQ4plex); K10(iTRAQ | 1 | 1 |
| [R].eQLGpVTQEFWDNLEk.[E]      | N-Term(iTRAQ4plex); K16(iTRAQ | 1 | 1 |
| [K].aKPALEDL.R.[Q]            | N-Term(iTRAQ4plex)            | 1 | 1 |
| [K].AKPALEDL.R.[Q]            | K2(iTRAQ4plex)                | 1 | 1 |
| [R].LAEYHAK.[A]               | K7(iTRAQ4plex)                | 1 | 1 |
| [R].LAEYHAK.[A]               | K7(iTRAQ4plex)                | 1 | 1 |
| [R].QGLLPVLESFk.[V]           | K11(iTRAQ4plex)               | 1 | 1 |
| [R].THLAPYSDEL.R.[Q]          |                               | 1 | 1 |
| [K].IHELQEk.[L]               | N-Term(iTRAQ4plex); K7(iTRAQ4 | 1 | 1 |
| [R].DYVSQFEGSALGk.[Q]         | K13(iTRAQ4plex)               | 1 | 1 |
| [K].vQPYLDDFQk.[K]            | N-Term(iTRAQ4plex); K10(iTRAQ | 1 | 1 |
| [R].THLAPYSDEL.R.[Q]          |                               | 1 | 1 |
| [K].ATEHLSTLSEK.[A]           | K11(iTRAQ4plex)               | 1 | 1 |

|                                    |                                          |   |   |
|------------------------------------|------------------------------------------|---|---|
| [R].dYVSQFEGSALGk.[Q]              | N-Term(iTRAQ4plex); K13(iTRAQ4plex)      | 1 | 1 |
| [K].akPALEDLR.[Q]                  | N-Term(iTRAQ4plex); K2(iTRAQ4plex)       | 1 | 1 |
| [R].eQLGPVTQEFWDNLEk.[E]           | N-Term(iTRAQ4plex); K16(iTRAQ4plex)      | 1 | 1 |
| [R].hFWQQDEPPQSPWDR.[V]            | N-Term(iTRAQ4plex)                       | 1 | 1 |
| [R].aELQEGAR.[Q]                   | N-Term(iTRAQ4plex)                       | 1 | 1 |
| [K].VSFLSALEEYtk.[K]               | K12(iTRAQ4plex)                          | 1 | 1 |
| [R].THLAPYSDELr.[Q]                |                                          | 1 | 1 |
| [K].wQEEemELyR.[Q]                 | N-Term(iTRAQ4plex); M5(Oxidation)        | 1 | 1 |
| [R].THLAPYSDELr.[Q]                |                                          | 1 | 1 |
| [K].LHELQEk.[L]                    | K7(iTRAQ4plex)                           | 1 | 1 |
| [R].hFWQQDEPPQSPWDR.[V]            | N-Term(iTRAQ4plex)                       | 1 | 1 |
| [R].RTHLPEVFLSk.[V]                | K11(iTRAQ4plex)                          | 1 | 1 |
| [R].rTHLPEVFLSk.[V]                | N-Term(iTRAQ4plex); K11(iTRAQ4plex)      | 1 | 1 |
| [R].rTHLPEVFLSk.[V]                | N-Term(iTRAQ4plex); K11(iTRAQ4plex)      | 1 | 1 |
| [R].RTHLPEVFLSk.[V]                | K11(iTRAQ4plex)                          | 1 | 1 |
| [K].HLSLLTTLsNR.[V]                |                                          | 1 | 1 |
| [K].hLsLLTTLsNR.[V]                | N-Term(iTRAQ4plex)                       | 1 | 1 |
| [R].tHLPEVFLSk.[V]                 | N-Term(iTRAQ4plex); K10(iTRAQ4plex)      | 1 | 1 |
| [K].hLsLLTTLsNR.[V]                | N-Term(iTRAQ4plex)                       | 1 | 1 |
| [R].vcSQYAAYGek.[K]                | N-Term(iTRAQ4plex); C2(Carbamidomethyl)  | 1 | 1 |
| [K].kELSSFIDk.[G]                  | N-Term(iTRAQ4plex); K1(iTRAQ4plex)       | 1 | 1 |
| [K].hQPQEFPTYVEPTNDEIcEAFr.[K]     | N-Term(iTRAQ4plex); C18(Carbamidomethyl) | 1 | 1 |
| [K].hQPQEFPTYVEPTNDEIcEAFr.[K]     | N-Term(iTRAQ4plex); C18(Carbamidomethyl) | 1 | 1 |
| [R].sDFASNccSINSPPlycDSEIDAELk.[N] | N-Term(iTRAQ4plex); C7(Carbamidomethyl)  | 1 | 1 |
| [R].sDFASNccSINSPPlycDSEIDAELk.[N] | N-Term(iTRAQ4plex); C7(Carbamidomethyl)  | 1 | 1 |
| [K].dVcDPGNTk.[V]                  | N-Term(iTRAQ4plex); C3(Carbamidomethyl)  | 1 | 1 |
| [R].sDFASNccSINSPPlycDSEIDAELk.[N] | N-Term(iTRAQ4plex); C7(Carbamidomethyl)  | 1 | 1 |
| [R].sDFASNccSINSPPlycDSEIDAELk.[N] | N-Term(iTRAQ4plex); C7(Carbamidomethyl)  | 1 | 1 |
| [R].sDFASNccSINSPPlycDSEIDAELk.[N] | N-Term(iTRAQ4plex); C7(Carbamidomethyl)  | 1 | 1 |
| [R].sDFASNccSINSPPlycDSEIDAELk.[N] | C7(Carbamidomethyl); C8(Carbamidomethyl) | 1 | 1 |
| [R].sDFASNccSINSPPlycDSEIDAELk.[N] | N-Term(iTRAQ4plex); C7(Carbamidomethyl)  | 1 | 1 |
| [R].sDFASNccSINSPPlycDSEIDAELk.[N] | N-Term(iTRAQ4plex); C7(Carbamidomethyl)  | 1 | 1 |
| [R].sDFASNccSINSPPlycDSEIDAELk.[N] | N-Term(iTRAQ4plex); C7(Carbamidomethyl)  | 1 | 1 |
| [R].sDFASNccSINSPPlycDSEIDAELk.[N] | N-Term(iTRAQ4plex); C7(Carbamidomethyl)  | 1 | 1 |
| [R].sDFASNccSINSPPlycDSEIDAELk.[N] | N-Term(iTRAQ4plex); C7(Carbamidomethyl)  | 1 | 1 |
| [R].sDFASNccSINSPPlycDSEIDAELk.[N] | N-Term(iTRAQ4plex); C7(Carbamidomethyl)  | 1 | 1 |
| [R].sDFASNccSINSPPlycDSEIDAELk.[N] | N-Term(iTRAQ4plex); C7(Carbamidomethyl)  | 1 | 1 |
| [K].hQPQEFPTYVEPTNDEIcEAFr.[K]     | N-Term(iTRAQ4plex); C18(Carbamidomethyl) | 1 | 1 |
| [R].sDFASNccSINSPPlycDSEIDAELk.[N] | N-Term(iTRAQ4plex); C7(Carbamidomethyl)  | 1 | 1 |
| [R].sDFASNccSINSPPlycDSEIDAELk.[N] | N-Term(iTRAQ4plex); C7(Carbamidomethyl)  | 1 | 1 |
| [K].HQPQEFPTYVEPTNDEIcEAFr.[K]     | C18(Carbamidomethyl)                     | 1 | 1 |
| [K].HQPQEFPTYVEPTNDEIcEAFr.[K]     | C18(Carbamidomethyl)                     | 1 | 1 |
| [K].HQPQEFPTYVEPTNDEIcEAFr.[K]     | C18(Carbamidomethyl)                     | 1 | 1 |
| [K].HQPQEFPTYVEPTNDEIcEAFr.[K]     | C18(Carbamidomethyl)                     | 1 | 1 |
| [K].hQPQEFPTYVEPTNDEIcEAFr.[K]     | N-Term(iTRAQ4plex); C18(Carbamidomethyl) | 1 | 1 |
| [K].HQPQEFPTYVEPTNDEIcEAFr.[K]     | C18(Carbamidomethyl)                     | 1 | 1 |
| [K].hQPQEFPTYVEPTNDEIcEAFr.[K]     | N-Term(iTRAQ4plex); C18(Carbamidomethyl) | 1 | 1 |
| [K].hQPQEFPTYVEPTNDEIcEAFr.[K]     | N-Term(iTRAQ4plex); C18(Carbamidomethyl) | 1 | 1 |
| [K].hQPQEFPTYVEPTNDEIcEAFr.[K]     | N-Term(iTRAQ4plex); C18(Carbamidomethyl) | 1 | 1 |
| [R].sDFASNccSINSPPlycDSEIDAELk.[N] | N-Term(iTRAQ4plex); C7(Carbamidomethyl)  | 1 | 1 |
| [R].sDFASNccSINSPPlycDSEIDAELk.[N] | N-Term(iTRAQ4plex); C7(Carbamidomethyl)  | 1 | 1 |
| [R].sDFASNccSINSPPlycDSEIDAELk.[N] | N-Term(iTRAQ4plex); C7(Carbamidomethyl)  | 1 | 1 |
| [K].hQPQEFPTYVEPTNDEIcEAFr.[K]     | N-Term(iTRAQ4plex); C18(Carbamidomethyl) | 1 | 1 |

|                                |                                |   |   |
|--------------------------------|--------------------------------|---|---|
| [K].hQPQEFPTYVEPTNDEIcEAFR.[K] | N-Term(iTRAQ4plex); C18(Carbam | 1 | 1 |
| [K].gQELcADYSENTFTEYk.[K]      | N-Term(iTRAQ4plex); C5(Carbam  | 1 | 1 |
| [K].gQELcADYSENTFTEYk.[K]      | N-Term(iTRAQ4plex); C5(Carbam  | 1 | 1 |
| [K].gQELcADYSENTFTEYk.[K]      | N-Term(iTRAQ4plex); C5(Carbam  | 1 | 1 |
| [K].hQPQEFPTYVEPTNDEIcEAFR.[K] | N-Term(iTRAQ4plex); C18(Carbar | 1 | 1 |
| [K].hQPQEFPTYVEPTNDEIcEAFR.[K] | N-Term(iTRAQ4plex); C18(Carbar | 1 | 1 |
| [K].hQPQEFPTYVEPTNDEIcEAFR.[K] | N-Term(iTRAQ4plex); C18(Carbar | 1 | 1 |
| [R].tHLPEVFLSk.[V]             | N-Term(iTRAQ4plex); K10(iTRAQ  | 1 | 1 |
| [K].hLSLLTTLsNR.[V]            | N-Term(iTRAQ4plex)             | 1 | 1 |
| [K].hLSLLTTLsNR.[V]            | N-Term(iTRAQ4plex)             | 1 | 1 |
| [K].hLSLLTTLsNR.[V]            | N-Term(iTRAQ4plex)             | 1 | 1 |
| [K].hLSLLTTLsNR.[V]            | N-Term(iTRAQ4plex)             | 1 | 1 |
| [K].dVcDPGNTk.[V]              | N-Term(iTRAQ4plex); C3(Carbam  | 1 | 1 |
| [K].kELSSFIDk.[G]              | N-Term(iTRAQ4plex); K1(iTRAQ4  | 1 | 1 |
| [K].kELSSFIDk.[G]              | N-Term(iTRAQ4plex); K1(iTRAQ4  | 1 | 1 |
| [R].rTHLPEVFLSk.[V]            | N-Term(iTRAQ4plex); K11(iTRAQ  | 1 | 1 |
| [R].RTHLPEVFLSk.[V]            | K11(iTRAQ4plex)                | 1 | 1 |
| [R].rTHLPEVFLSk.[V]            | N-Term(iTRAQ4plex); K11(iTRAQ  | 1 | 1 |
| [R].rTHLPEVFLSk.[V]            | N-Term(iTRAQ4plex); K11(iTRAQ  | 1 | 1 |
| [R].RTHLPEVFLSk.[V]            | K11(iTRAQ4plex)                | 1 | 1 |
| [R].rTHLPEVFLSk.[V]            | N-Term(iTRAQ4plex); K11(iTRAQ  | 1 | 1 |
| [R].rTHLPEVFLSk.[V]            | N-Term(iTRAQ4plex); K11(iTRAQ  | 1 | 1 |
| [R].RTHLPEVFLSk.[V]            | K11(iTRAQ4plex)                | 1 | 1 |
| [R].RTHLPEVFLSk.[V]            | K11(iTRAQ4plex)                | 1 | 1 |
| [R].rTHLPEVFLSk.[V]            | N-Term(iTRAQ4plex); K11(iTRAQ  | 1 | 1 |
| [R].tHLPEVFLSK.[V]             | N-Term(iTRAQ4plex)             | 1 | 1 |
| [K].lCMAALk.[H]                | N-Term(iTRAQ4plex); C2(Carbam  | 1 | 1 |
| [R].rTHLPEVFLSk.[V]            | N-Term(iTRAQ4plex); K11(iTRAQ  | 1 | 1 |
| [R].rTHLPEVFLSk.[V]            | N-Term(iTRAQ4plex); K11(iTRAQ  | 1 | 1 |
| [R].tHLPEVFLSk.[V]             | N-Term(iTRAQ4plex); K10(iTRAQ  | 1 | 1 |
| [R].tHLPEVFLSk.[V]             | N-Term(iTRAQ4plex); K10(iTRAQ  | 1 | 1 |
| [R].tHLPEVFLSk.[V]             | N-Term(iTRAQ4plex); K10(iTRAQ  | 1 | 1 |
| [R].tHLPEVFLSk.[V]             | N-Term(iTRAQ4plex); K10(iTRAQ  | 1 | 1 |
| [R].tHLPEVFLSk.[V]             | N-Term(iTRAQ4plex); K10(iTRAQ  | 1 | 1 |
| [R].tHLPEVFLSk.[V]             | N-Term(iTRAQ4plex); K10(iTRAQ  | 1 | 1 |
| [R].tHLPEVFLSk.[V]             | N-Term(iTRAQ4plex); K10(iTRAQ  | 1 | 1 |
| [K].eDFTSLSLVLYSR.[K]          | N-Term(iTRAQ4plex)             | 1 | 1 |
| [R].kLcMAALk.[H]               | N-Term(iTRAQ4plex); K1(iTRAQ4  | 1 | 1 |
| [R].kLcMAALk.[H]               | N-Term(iTRAQ4plex); K1(iTRAQ4  | 1 | 1 |
| [K].eDFTSLSLVLYSR.[K]          | N-Term(iTRAQ4plex)             | 1 | 1 |
| [K].eDFTSLSLVLYSR.[K]          | N-Term(iTRAQ4plex)             | 1 | 1 |
| [R].kFPSGTFEQVSQLVk.[E]        | N-Term(iTRAQ4plex); K1(iTRAQ4  | 1 | 1 |
| [R].kFPSGTFEQVSQLVk.[E]        | N-Term(iTRAQ4plex); K1(iTRAQ4  | 1 | 1 |
| [K].VPTADLEDVPLAEDITNILSk.[C]  | K22(iTRAQ4plex)                | 1 | 1 |
| [K].vPTADLEDVPLAEDITNILSk.[C]  | N-Term(iTRAQ4plex); K22(iTRAQ  | 1 | 1 |
| [R].RTHLPEVFLSk.[V]            | K11(iTRAQ4plex)                | 1 | 1 |
| [R].VcSQYAAYGEk.[K]            | C2(Carbamidomethyl); K11(iTRA  | 1 | 1 |
| [R].tHLPEVFLSk.[V]             | N-Term(iTRAQ4plex); K10(iTRAQ  | 1 | 1 |
| [K].sLGEccDVEDSTTcFNAk.[G]     | N-Term(iTRAQ4plex); C5(Carbam  | 1 | 1 |
| [K].sLGEccDVEDSTTcFNAk.[G]     | N-Term(iTRAQ4plex); C5(Carbam  | 1 | 1 |
| [K].sLGEccDVEDSTTcFNAk.[G]     | N-Term(iTRAQ4plex); C5(Carbam  | 1 | 1 |
| [K].sLGEccDVEDSTTcFNAk.[G]     | N-Term(iTRAQ4plex); C5(Carbam  | 1 | 1 |

|                                     |                               |   |   |
|-------------------------------------|-------------------------------|---|---|
| [K].sLGEccDVEDSTTcFNAk.[G]          | N-Term(iTRAQ4plex); C5(Carbam | 1 | 1 |
| [K].sLGEccDVEDSTTcFNAk.[G]          | N-Term(iTRAQ4plex); C5(Carbam | 1 | 1 |
| [K].fPSGTFEQVSQLVk.[E]              | N-Term(iTRAQ4plex); K14(iTRAQ | 1 | 1 |
| [K].gQELcADYSENTFTEYk.[K]           | N-Term(iTRAQ4plex); C5(Carbam | 1 | 1 |
| [K].gQELcADYSENTFTEYk.[K]           | N-Term(iTRAQ4plex); C5(Carbam | 1 | 1 |
| [K].gQELcADYSENTFTEYk.[K]           | N-Term(iTRAQ4plex); C5(Carbam | 1 | 1 |
| [K].gQELcADYSENTFTEYk.[K]           | N-Term(iTRAQ4plex); C5(Carbam | 1 | 1 |
| [K].gQELcADYSENTFTEYk.[K]           | N-Term(iTRAQ4plex); C5(Carbam | 1 | 1 |
| [K].gQELcADYSENTFTEYk.[K]           | N-Term(iTRAQ4plex); C5(Carbam | 1 | 1 |
| [K].gQELcADYSENTFTEYk.[K]           | N-Term(iTRAQ4plex); C5(Carbam | 1 | 1 |
| [K].gQELcADYSENTFTEYk.[K]           | N-Term(iTRAQ4plex); C5(Carbam | 1 | 1 |
| [K].gQELcADYSENTFTEYk.[K]           | N-Term(iTRAQ4plex); C5(Carbam | 1 | 1 |
| [K].gQELcADYSENTFTEYk.[K]           | N-Term(iTRAQ4plex); C5(Carbam | 1 | 1 |
| [K].gQELcADYSENTFTEYk.[K]           | N-Term(iTRAQ4plex); C5(Carbam | 1 | 1 |
| [K].gQELcADYSENTFTEYk.[K]           | N-Term(iTRAQ4plex); C5(Carbam | 1 | 1 |
| [K].gQELcADYSENTFTEYk.[K]           | N-Term(iTRAQ4plex); C5(Carbam | 1 | 1 |
| [K].eVVS LTEAccAEGADPDcYDTR.[T]     | N-Term(iTRAQ4plex); C9(Carbam | 1 | 1 |
| [K].gQELcADYSENTFTEYk.[K]           | N-Term(iTRAQ4plex); C5(Carbam | 1 | 1 |
| [K].eVVS LTEAccAEGADPDcYDTR.[T]     | N-Term(iTRAQ4plex); C9(Carbam | 1 | 1 |
| [K].gQELcADYSENTFTEYk.[K]           | N-Term(iTRAQ4plex); C5(Carbam | 1 | 1 |
| [K].eFShLGkEDFTSLSLVLYSR.[K]        | N-Term(iTRAQ4plex); K7(iTRAQ4 | 1 | 1 |
| [K].eVVS LTEAccAEGADPDcYDTR.[T]     | N-Term(iTRAQ4plex); C9(Carbam | 1 | 1 |
| [K].eVVS LTEAccAEGADPDcYDTR.[T]     | N-Term(iTRAQ4plex); C9(Carbam | 1 | 1 |
| [K].eVVS LTEAccAEGADPDcYDTR.[T]     | N-Term(iTRAQ4plex); C9(Carbam | 1 | 1 |
| [K].sYLSMVGScCtSASPTVcFLk.[E]       | N-Term(iTRAQ4plex); C9(Carbam | 1 | 1 |
| [K].sYLSMVGScCtSASPTVcFLk.[E]       | N-Term(iTRAQ4plex); C9(Carbam | 1 | 1 |
| [K].eLPEHTVk.[L]                    | N-Term(iTRAQ4plex); K8(iTRAQ4 | 1 | 1 |
| [K].eLPEHTVk.[L]                    | N-Term(iTRAQ4plex); K8(iTRAQ4 | 1 | 1 |
| [RK].tsALSAk.[SK]                   | N-Term(iTRAQ4plex); K7(iTRAQ4 | 1 | 2 |
| [K].sYLSMVGScCtSASPTVcFLk.[E]       | C9(Carbamidomethyl); C10(Carb | 1 | 1 |
| [K].ScESNSPFPVHPGTAEccTk.[E]        | C2(Carbamidomethyl); C17(Carb | 1 | 1 |
| [K].scESNSPFPVHPGTAEccTk.[E]        | N-Term(iTRAQ4plex); C2(Carbam | 1 | 1 |
| [K].ScESNSPFPVHPGTAEccTk.[E]        | C2(Carbamidomethyl); C17(Carb | 1 | 1 |
| [K].sYLSMVGScCtSASPTVcFLk.[E]       | N-Term(iTRAQ4plex); C9(Carbam | 1 | 1 |
| [K].sYLSMVGScCtSASPTVcFLk.[E]       | N-Term(iTRAQ4plex); C9(Carbam | 1 | 1 |
| [R].vcSQYAAYGEk.[K]                 | N-Term(iTRAQ4plex); C2(Carbam | 1 | 1 |
| [R].vcSQYAAYGEk.[K]                 | N-Term(iTRAQ4plex); C2(Carbam | 1 | 1 |
| [K].fEDccQEK.[T]                    | N-Term(iTRAQ4plex); C4(Carbam | 1 | 1 |
| [R].kFPSGTFEQVSQLVk.[E]             | N-Term(iTRAQ4plex); K1(iTRAQ4 | 1 | 1 |
| [R].kFPSGTFEQVSQLVk.[E]             | N-Term(iTRAQ4plex); K1(iTRAQ4 | 1 | 1 |
| [R].kFPSGTFEQVSQLVk.[E]             | N-Term(iTRAQ4plex); K15(iTRAQ | 1 | 1 |
| [K].eLSSFIDk.[G]                    | N-Term(iTRAQ4plex); K8(iTRAQ4 | 1 | 1 |
| [K].eLSSFIDk.[G]                    | N-Term(iTRAQ4plex); K8(iTRAQ4 | 1 | 1 |
| [R].kFPSGTFEQVSQLVk.[E]             | K1(iTRAQ4plex); K15(iTRAQ4ple | 1 | 1 |
| [R].kFPSGTFEQVSQLVk.[E]             | N-Term(iTRAQ4plex); K15(iTRAQ | 1 | 1 |
| [R].kFPSGTFEQVSQLVk.[E]             | K1(iTRAQ4plex); K15(iTRAQ4ple | 1 | 1 |
| [R].kFPSGTFEQVSQLVk.[E]             | N-Term(iTRAQ4plex); K1(iTRAQ4 | 1 | 1 |
| [R].kFPSGTFEQVSQLVk.[E]             | N-Term(iTRAQ4plex); K1(iTRAQ4 | 1 | 1 |
| [K].dVcDPGNTk.[V]                   | N-Term(iTRAQ4plex); C3(Carbam | 1 | 1 |
| [K].eYANQFMWEYSTNYGQAPLSLLVSYtk.[S] | N-Term(iTRAQ4plex); K27(iTRAQ | 1 | 1 |
| [R].kFPSGTFEQVSQLVk.[E]             | N-Term(iTRAQ4plex); K1(iTRAQ4 | 1 | 1 |
| [R].kFPSGTFEQVSQLVk.[E]             | N-Term(iTRAQ4plex); K1(iTRAQ4 | 1 | 1 |
| [K].tAMDVFVcTYFMPAAQLPELDPVELPTNk.  | N-Term(iTRAQ4plex); C8(Carbam | 1 | 1 |

|                                    |                               |   |   |
|------------------------------------|-------------------------------|---|---|
| [K].eLSSFIDk.[G]                   | N-Term(iTRAQ4plex); K8(iTRAQ4 | 1 | 1 |
| [R].kFPSGTFEQVSQLVk.[E]            | K1(iTRAQ4plex); K15(iTRAQ4ple | 1 | 1 |
| [R].kFPSGTFEQVSQLVk.[E]            | N-Term(iTRAQ4plex); K1(iTRAQ4 | 1 | 1 |
| [R].kFPSGTFEQVSQLVk.[E]            | N-Term(iTRAQ4plex); K15(iTRAQ | 1 | 1 |
| [K].ccESASEDcMAk.[E]               | N-Term(iTRAQ4plex); C1(Carbam | 1 | 1 |
| [K].eLSSFIDk.[G]                   | N-Term(iTRAQ4plex); K8(iTRAQ4 | 1 | 1 |
| [K].ccESASEDcMAk.[E]               | N-Term(iTRAQ4plex); C1(Carbam | 1 | 1 |
| [K].lcDNLSTk.[N]                   | N-Term(iTRAQ4plex); C2(Carbam | 1 | 1 |
| [R].vcSQYAAYGEk.[K]                | N-Term(iTRAQ4plex); C2(Carbam | 1 | 1 |
| [K].scESNSPPFPVHPGTAEccTk.[E]      | N-Term(iTRAQ4plex); C2(Carbam | 1 | 1 |
| [K].scESNSPPFPVHPGTAEccTk.[E]      | N-Term(iTRAQ4plex); C2(Carbam | 1 | 1 |
| [K].scESNSPPFPVHPGTAEccTk.[E]      | N-Term(iTRAQ4plex); C2(Carbam | 1 | 1 |
| [K].dVcDPGNTk.[V]                  | N-Term(iTRAQ4plex); C3(Carbam | 1 | 1 |
| [R].vcSQYAAYGEk.[K]                | N-Term(iTRAQ4plex); C2(Carbam | 1 | 1 |
| [R].vcSQYAAYGEk.[K]                | N-Term(iTRAQ4plex); C2(Carbam | 1 | 1 |
| [K].ccESASEDcMAk.[E]               | C1(Carbamidomethyl); C2(Carba | 1 | 1 |
| [R].SDFASNccSINSPPLYcDSEIDAELk.[N] | C7(Carbamidomethyl); C8(Carba | 1 | 1 |
| [R].RTHLPEVFLSk.[V]                | K11(iTRAQ4plex)               | 1 | 1 |
| [K].kELSSFIDk.[G]                  | N-Term(iTRAQ4plex); K1(iTRAQ4 | 1 | 1 |
| [K].eLPEHTVk.[L]                   | N-Term(iTRAQ4plex); K8(iTRAQ4 | 1 | 1 |
| [K].GQELcADYSENTFTEYk.[K]          | C5(Carbamidomethyl); K17(iTRA | 1 | 1 |
| [K].hLSLLTTLsNR.[V]                | N-Term(iTRAQ4plex)            | 1 | 1 |
| [R].sDFASNccSINSPPLYcDSEIDAELk.[N] | N-Term(iTRAQ4plex); C7(Carbam | 1 | 1 |
| [K].HLSLLTTLsNR.[V]                |                               | 1 | 1 |
| [K].hLSLLTTLsNR.[V]                | N-Term(iTRAQ4plex)            | 1 | 1 |
| [RK].tsALSAk.[SK]                  | N-Term(iTRAQ4plex); K7(iTRAQ4 | 1 | 2 |
| [K].fEDccQEK.[T]                   | N-Term(iTRAQ4plex); C4(Carbam | 1 | 1 |
| [RK].tsALSAk.[SK]                  | N-Term(iTRAQ4plex); K7(iTRAQ4 | 1 | 2 |
| [K].dVcDPGNTk.[V]                  | N-Term(iTRAQ4plex); C3(Carbam | 1 | 1 |
| [R].tHLPEVFLSk.[V]                 | N-Term(iTRAQ4plex); K10(iTRAQ | 1 | 1 |
| [K].lcDNLSTk.[N]                   | N-Term(iTRAQ4plex); C2(Carbam | 1 | 1 |
| [R].sDFASNccSINSPPLYcDSEIDAELk.[N] | N-Term(iTRAQ4plex); C7(Carbam | 1 | 1 |
| [K].LcDNLSTk.[N]                   | C2(Carbamidomethyl); K8(iTRAC | 1 | 1 |
| [K].fEDccQEK.[T]                   | N-Term(iTRAQ4plex); C4(Carbam | 1 | 1 |
| [R].THLPEVFLSk.[V]                 | K10(iTRAQ4plex)               | 1 | 1 |
| [K].eFShLGkEDFTSLSLVLYSR.[K]       | N-Term(iTRAQ4plex); K7(iTRAQ4 | 1 | 1 |
| [R].sDFASNccSINSPPLYcDSEIDAELk.[N] | N-Term(iTRAQ4plex); C7(Carbam | 1 | 1 |
| [R].sDFASNccSINSPPLYcDSEIDAELk.[N] | N-Term(iTRAQ4plex); C7(Carbam | 1 | 1 |
| [K].dVcDPGNTk.[V]                  | N-Term(iTRAQ4plex); C3(Carbam | 1 | 1 |
| [K].eLPEHTVk.[L]                   | N-Term(iTRAQ4plex); K8(iTRAQ4 | 1 | 1 |
| [K].LcDNLSTk.[N]                   | C2(Carbamidomethyl); K8(iTRAC | 1 | 1 |
| [R].VcSQYAAYGEk.[K]                | C2(Carbamidomethyl); K11(iTRA | 1 | 1 |
| [K].lcDNLSTk.[N]                   | N-Term(iTRAQ4plex); C2(Carbam | 1 | 1 |
| [R].RTHLPEVFLSk.[V]                | K11(iTRAQ4plex)               | 1 | 1 |
| [RK].tsALSAk.[SK]                  | N-Term(iTRAQ4plex); K7(iTRAQ4 | 1 | 2 |
| [K].gQELcADYSENTFTEYk.[K]          | N-Term(iTRAQ4plex); C5(Carbam | 1 | 1 |
| [K].LcDNLSTk.[N]                   | C2(Carbamidomethyl); K8(iTRAC | 1 | 1 |
| [K].fEDccQEK.[T]                   | N-Term(iTRAQ4plex); C4(Carbam | 1 | 1 |
| [K].fEDccQEK.[T]                   | N-Term(iTRAQ4plex); C4(Carbam | 1 | 1 |
| [K].HLSLLTTLsNR.[V]                |                               | 1 | 1 |
| [R].vcSQYAAYGEk.[K]                | N-Term(iTRAQ4plex); C2(Carbam | 1 | 1 |
| [K].lcMAALk.[H]                    | N-Term(iTRAQ4plex); C2(Carbam | 1 | 1 |

|                                   |                               |   |   |
|-----------------------------------|-------------------------------|---|---|
| [R].THLPEVFLSk.[V]                | K10(iTRAQ4plex)               | 1 | 1 |
| [K].akLPDATPk.[E]                 | N-Term(iTRAQ4plex); K2(iTRAQ4 | 1 | 1 |
| [R].kLcMAALk.[H]                  | N-Term(iTRAQ4plex); K1(iTRAQ4 | 1 | 1 |
| [RK].tsALSAk.[SK]                 | N-Term(iTRAQ4plex); K7(iTRAQ4 | 1 | 2 |
| [K].HLSLLTTLsNR.[V]               |                               | 1 | 1 |
| [RK].tsALSAk.[SK]                 | N-Term(iTRAQ4plex); K7(iTRAQ4 | 1 | 2 |
| [K].eLPEHTVk.[L]                  | N-Term(iTRAQ4plex); K8(iTRAQ4 | 1 | 1 |
| [R].THLPEVFLSk.[V]                | K10(iTRAQ4plex)               | 1 | 1 |
| [K].eLPEHTVk.[L]                  | N-Term(iTRAQ4plex); K8(iTRAQ4 | 1 | 1 |
| [R].sDFASNccSINSPLYcDSEIDAELk.[N] | N-Term(iTRAQ4plex); C7(Carbam | 1 | 1 |
| [K].vLEPTLk.[S]                   | N-Term(iTRAQ4plex); K7(iTRAQ4 | 1 | 1 |
| [K].gQELcADYSENTFTEYk.[K]         | N-Term(iTRAQ4plex); C5(Carbam | 1 | 1 |
| [R].RTHLPEVFLSk.[V]               | K11(iTRAQ4plex)               | 1 | 1 |
| [K].eLPEHTVk.[L]                  | N-Term(iTRAQ4plex); K8(iTRAQ4 | 1 | 1 |
| [R].rTHLPEVFLSk.[V]               | N-Term(iTRAQ4plex); K11(iTRAQ | 1 | 1 |
| [K].fPSGTFEQVSQLVk.[E]            | N-Term(iTRAQ4plex); K14(iTRAQ | 1 | 1 |
| [K].gQELcADYSENTFTEYk.[K]         | N-Term(iTRAQ4plex); C5(Carbam | 1 | 1 |
| [K].kELSSFIDk.[G]                 | N-Term(iTRAQ4plex); K1(iTRAQ4 | 1 | 1 |
| [K].LcDNLSTk.[N]                  | N-Term(iTRAQ4plex); C2(Carbam | 1 | 1 |
| [RK].tsALSAk.[SK]                 | N-Term(iTRAQ4plex); K7(iTRAQ4 | 1 | 2 |
| [R].kLcMAALk.[H]                  | N-Term(iTRAQ4plex); K1(iTRAQ4 | 1 | 1 |
| [K].sLGEccDVEDSTTcFNAk.[G]        | N-Term(iTRAQ4plex); C5(Carbam | 1 | 1 |
| [K].eLSSFIDk.[G]                  | N-Term(iTRAQ4plex); K8(iTRAQ4 | 1 | 1 |
| [K].eVVS LTEAccAEGADPDcYDTR.[T]   | N-Term(iTRAQ4plex); C9(Carbam | 1 | 1 |
| [K].IPDATPk.[E]                   | N-Term(iTRAQ4plex); K7(iTRAQ4 | 1 | 1 |
| [K].fEDccQEK.[T]                  | N-Term(iTRAQ4plex); C4(Carbam | 1 | 1 |
| [K].eLPEHTVk.[L]                  | N-Term(iTRAQ4plex); K8(iTRAQ4 | 1 | 1 |
| [K].gQELcADYSENTFTEYk.[K]         | N-Term(iTRAQ4plex); C5(Carbam | 1 | 1 |
| [K].LcDNLSTk.[N]                  | C2(Carbamidomethyl); K8(iTRAC | 1 | 1 |
| [K].eVVS LTEAccAEGADPDcYDTR.[T]   | N-Term(iTRAQ4plex); C9(Carbam | 1 | 1 |
| [R].thLPEVFLSk.[V]                | N-Term(iTRAQ4plex); K10(iTRAQ | 1 | 1 |
| [R].THLPEVFLSk.[V]                | K10(iTRAQ4plex)               | 1 | 1 |
| [R].kLcmAALk.[H]                  | N-Term(iTRAQ4plex); K1(iTRAQ4 | 1 | 1 |
| [R].vcSQYAAYGEkkSR.[L]            | N-Term(iTRAQ4plex); C2(Carbam | 1 | 1 |
| [K].LPDATPk.[E]                   | K7(iTRAQ4plex)                | 1 | 1 |
| [K].sLGEccDVEDSTTcFNAk.[G]        | N-Term(iTRAQ4plex); C5(Carbam | 1 | 1 |
| [K].vPTADLEDVPLAEDITNILSk.[C]     | N-Term(iTRAQ4plex); K22(iTRAQ | 1 | 1 |
| [K].ELSSFIDk.[G]                  | K8(iTRAQ4plex)                | 1 | 1 |
| [K].gQELcADYSENTFTEYk.[K]         | N-Term(iTRAQ4plex); C5(Carbam | 1 | 1 |
| [R].sDFASNccSINSPLYcDSEIDAELk.[N] | N-Term(iTRAQ4plex); C7(Carbam | 1 | 1 |
| [K].LcDNLSTk.[N]                  | C2(Carbamidomethyl); K8(iTRAC | 1 | 1 |
| [R].kLcmAALk.[H]                  | N-Term(iTRAQ4plex); K1(iTRAQ4 | 1 | 1 |
| [K].kELSSFIDk.[G]                 | N-Term(iTRAQ4plex); K1(iTRAQ4 | 1 | 1 |
| [RK].tsALSAk.[SK]                 | N-Term(iTRAQ4plex); K7(iTRAQ4 | 1 | 2 |
| [K].eVVS LTEAccAEGADPDcYDTR.[T]   | N-Term(iTRAQ4plex); C9(Carbam | 1 | 1 |
| [RK].TSALSAk.[SK]                 | K7(iTRAQ4plex)                | 1 | 2 |
| [K].sLGEccDVEDSTTcFNAk.[G]        | N-Term(iTRAQ4plex); C5(Carbam | 1 | 1 |
| [R].kLcMAALk.[H]                  | K1(iTRAQ4plex); C3(Carbamidon | 1 | 1 |
| [R].kLcMAALk.[H]                  | N-Term(iTRAQ4plex); C3(Carbam | 1 | 1 |
| [K].gQELcADYSENTFTEYk.[K]         | N-Term(iTRAQ4plex); C5(Carbam | 1 | 1 |
| [K].IPDATPk.[E]                   | N-Term(iTRAQ4plex); K7(iTRAQ4 | 1 | 1 |
| [K].HLSLLTTLsNR.[V]               |                               | 1 | 1 |



|                                    |                                |   |   |
|------------------------------------|--------------------------------|---|---|
| [R].vcSQYAAYGEk.[K]                | N-Term(iTRAQ4plex); C2(Carbam  | 1 | 1 |
| [R].vcSQYAAYGEk.[K]                | N-Term(iTRAQ4plex); C2(Carbam  | 1 | 1 |
| [K].hQPQEFPTYVEPTNDEIcEAFR.[K]     | N-Term(iTRAQ4plex); C18(Carbar | 1 | 1 |
| [K].ccESASEDcMAk.[E]               | N-Term(iTRAQ4plex); C1(Carbam  | 1 | 1 |
| [K].eLSSFIDk.[G]                   | N-Term(iTRAQ4plex); K8(iTRAQ4  | 1 | 1 |
| [K].vLEPTLk.[S]                    | N-Term(iTRAQ4plex); K7(iTRAQ4  | 1 | 1 |
| [R].sDFASNccSINSPPLYcDSEIDAELk.[N] | N-Term(iTRAQ4plex); C7(Carbam  | 1 | 1 |
| [K].dVcDPGNTk.[V]                  | N-Term(iTRAQ4plex); C3(Carbam  | 1 | 1 |
| [RK].tSALSAk.[SK]                  | N-Term(iTRAQ4plex); K7(iTRAQ4  | 1 | 2 |
| [K].ccESASEDcmAk.[E]               | N-Term(iTRAQ4plex); C1(Carbam  | 1 | 1 |
| [R].kLcmAALk.[H]                   | N-Term(iTRAQ4plex); K1(iTRAQ4  | 1 | 1 |
| [R].vcSQYAAYGEk.[K]                | N-Term(iTRAQ4plex); C2(Carbam  | 1 | 1 |
| [K].vLEPTLk.[S]                    | N-Term(iTRAQ4plex); K7(iTRAQ4  | 1 | 1 |
| [R].kFPSGTFEQVSQLVk.[E]            | N-Term(iTRAQ4plex); K1(iTRAQ4  | 1 | 1 |
| [K].eLPEHTVk.[L]                   | N-Term(iTRAQ4plex); K8(iTRAQ4  | 1 | 1 |
| [K].LcDNLSTk.[N]                   | C2(Carbamidomethyl); K8(iTRAC  | 1 | 1 |
| [K].LcDNLSTk.[N]                   | C2(Carbamidomethyl); K8(iTRAC  | 1 | 1 |
| [K].eLSSFIDk.[G]                   | N-Term(iTRAQ4plex); K8(iTRAQ4  | 1 | 1 |
| [K].vLEPTLk.[S]                    | N-Term(iTRAQ4plex); K7(iTRAQ4  | 1 | 1 |
| [R].kFPSGTFEQVSQLVk.[E]            | N-Term(iTRAQ4plex); K1(iTRAQ4  | 1 | 1 |
| [K].eLPEHTVk.[L]                   | N-Term(iTRAQ4plex); K8(iTRAQ4  | 1 | 1 |
| [K].LcDNLSTk.[N]                   | C2(Carbamidomethyl); K8(iTRAC  | 1 | 1 |
| [K].dVcDPGNTk.[V]                  | N-Term(iTRAQ4plex); C3(Carbam  | 1 | 1 |
| [R].kLcmAALk.[H]                   | N-Term(iTRAQ4plex); C3(Carbam  | 1 | 1 |
| [R].kLcmAALk.[H]                   | K1(iTRAQ4plex); C3(Carbamidon  | 1 | 1 |
| [K].LcDNLSTk.[N]                   | C2(Carbamidomethyl); K8(iTRAC  | 1 | 1 |
| [K].hLSLLTTLsNR.[V]                | N-Term(iTRAQ4plex)             | 1 | 1 |
| [K].vPTADLEDVPLAEDITNILSk.[C]      | N-Term(iTRAQ4plex); K22(iTRAQ  | 1 | 1 |
| [K].eVvSLTEAccAEGADPDcYDTR.[T]     | N-Term(iTRAQ4plex); C9(Carbam  | 1 | 1 |
| [R].THLPEVFLSk.[V]                 | K10(iTRAQ4plex)                | 1 | 1 |
| [K].ccESASEDcMAk.[E]               | C1(Carbamidomethyl); C2(Carba  | 1 | 1 |
| [R].vcSQYAAYGEk.[K]                | N-Term(iTRAQ4plex); C2(Carbam  | 1 | 1 |
| [K].LcDNLSTk.[N]                   | C2(Carbamidomethyl); K8(iTRAC  | 1 | 1 |
| [K].fEDccQEK.[T]                   | N-Term(iTRAQ4plex); C4(Carbam  | 1 | 1 |
| [R].RTHLPEVFLSk.[V]                | K11(iTRAQ4plex)                | 1 | 1 |
| [R].sDFASNccSINSPPLYcDSEIDAELk.[N] | N-Term(iTRAQ4plex); C7(Carbam  | 1 | 1 |
| [K].hLSLLTTLsNR.[V]                | N-Term(iTRAQ4plex)             | 1 | 1 |
| [R].kLcMAALk.[H]                   | N-Term(iTRAQ4plex); K1(iTRAQ4  | 1 | 1 |
| [K].gQELcADYSENTFTEYk.[K]          | N-Term(iTRAQ4plex); C5(Carbam  | 1 | 1 |
| [RK].TSALSAk.[SK]                  | K7(iTRAQ4plex)                 | 1 | 2 |
| [K].eVvSLTEAccAEGADPDcYDTR.[T]     | N-Term(iTRAQ4plex); C9(Carbam  | 1 | 1 |
| [K].hLSLLTTLsNR.[V]                | N-Term(iTRAQ4plex)             | 1 | 1 |
| [K].SYLSMVGScTSASPTVcFLk.[E]       | C9(Carbamidomethyl); C10(Carb  | 1 | 1 |
| [K].LcDNLSTk.[N]                   | C2(Carbamidomethyl); K8(iTRAC  | 1 | 1 |
| [R].sDFASNccSINSPPLYcDSEIDAELk.[N] | N-Term(iTRAQ4plex); C7(Carbam  | 1 | 1 |
| [K].lCMAALk.[H]                    | N-Term(iTRAQ4plex); C2(Carbam  | 1 | 1 |
| [K].kELSSFIDk.[G]                  | N-Term(iTRAQ4plex); K1(iTRAQ4  | 1 | 1 |
| [R].kFPSGTFEQVSQLVk.[E]            | N-Term(iTRAQ4plex); K1(iTRAQ4  | 1 | 1 |
| [K].GQELcADYSENTFTEYk.[K]          | C5(Carbamidomethyl); K17(iTRA  | 1 | 1 |
| [R].THLPEVFLSk.[V]                 | K10(iTRAQ4plex)                | 1 | 1 |
| [K].ccESASEDcMAk.[E]               | N-Term(iTRAQ4plex); C1(Carbam  | 1 | 1 |
| [K].fEDccQEK.[T]                   | N-Term(iTRAQ4plex); C4(Carbam  | 1 | 1 |

|                                  |                                |   |   |
|----------------------------------|--------------------------------|---|---|
| [K].LcDNLSTk.[N]                 | C2(Carbamidomethyl); K8(iTRAC  | 1 | 1 |
| [K].eVVSLEAccAEGADPDcYDTR.[T]    | N-Term(iTRAQ4plex); C9(Carbam  | 1 | 1 |
| [K].aLVQQMEQLR.[Q]               | N-Term(iTRAQ4plex)             | 1 | 1 |
| [K].aLVQQMEQLR.[Q]               | N-Term(iTRAQ4plex)             | 1 | 1 |
| [K].aLVQQMEQLR.[Q]               | N-Term(iTRAQ4plex)             | 1 | 1 |
| [K].aLVQQMEQLR.[Q]               | N-Term(iTRAQ4plex)             | 1 | 1 |
| [R].ILPHANEVSQk.[I]              | N-Term(iTRAQ4plex); K11(iTRAQ  | 1 | 1 |
| [R].TQVNTQAEQLR.[R]              |                                | 1 | 1 |
| [K].LNHQLEGLTFQMk.[K]            | N-Term(iTRAQ4plex); K13(iTRAQ  | 1 | 1 |
| [K].IVPFATELHER.[L]              | N-Term(iTRAQ4plex)             | 1 | 1 |
| [K].tLSLPELEQQQEQQQEQQEQVQMLAPLE | N-Term(iTRAQ4plex)             | 1 | 1 |
| [K].tLSLPELEQQQEQQQEQQEQVQMLAPLE | N-Term(iTRAQ4plex)             | 1 | 1 |
| [K].tLSLPELEQQQEQQQEQQEQVQmLAPLE | N-Term(iTRAQ4plex); M24(Oxida  | 1 | 1 |
| [R].ILPHANEVSQk.[I]              | N-Term(iTRAQ4plex); K11(iTRAQ  | 1 | 1 |
| [R].ILPHANEVSQk.[I]              | N-Term(iTRAQ4plex); K11(iTRAQ  | 1 | 1 |
| [K].aLVQQmEQLR.[Q]               | N-Term(iTRAQ4plex); M6(Oxidati | 1 | 1 |
| [R].ILPHANEVSQk.[I]              | N-Term(iTRAQ4plex); K11(iTRAQ  | 1 | 1 |
| [R].ILPHANEVSQk.[I]              | N-Term(iTRAQ4plex); K11(iTRAQ  | 1 | 1 |
| [K].kLVPFATELHER.[L]             | N-Term(iTRAQ4plex); K1(iTRAQ4  | 1 | 1 |
| [K].kLVPFATELHER.[L]             | N-Term(iTRAQ4plex); K1(iTRAQ4  | 1 | 1 |
| [K].kLVPFATELHER.[L]             | N-Term(iTRAQ4plex); K1(iTRAQ4  | 1 | 1 |
| [K].kLVPFATELHER.[L]             | N-Term(iTRAQ4plex); K1(iTRAQ4  | 1 | 1 |
| [R].TQVNTQAEQLR.[R]              |                                | 1 | 1 |
| [K].sLAELGGHLDQQVEEFRR.[R]       | N-Term(iTRAQ4plex)             | 1 | 1 |
| [K].IVPFATELHER.[L]              | N-Term(iTRAQ4plex)             | 1 | 1 |
| [K].IVPFATELHER.[L]              | N-Term(iTRAQ4plex)             | 1 | 1 |
| [K].LNHQLEGLTFQMk.[K]            | K13(iTRAQ4plex)                | 1 | 1 |
| [K].IVPFATELHER.[L]              | N-Term(iTRAQ4plex)             | 1 | 1 |
| [K].IVPFATELHER.[L]              | N-Term(iTRAQ4plex)             | 1 | 1 |
| [K].LNHQLEGLTFQMk.[K]            | N-Term(iTRAQ4plex); K13(iTRAQ  | 1 | 1 |
| [K].IGPHAGDVEGHLSFlek.[D]        | N-Term(iTRAQ4plex); K17(iTRAQ  | 1 | 1 |
| [K].IGPHAGDVEGHLSFlek.[D]        | N-Term(iTRAQ4plex); K17(iTRAQ  | 1 | 1 |
| [K].IGPHAGDVEGHLSFlek.[D]        | N-Term(iTRAQ4plex); K17(iTRAQ  | 1 | 1 |
| [K].LNHQLEGLTFQMk.[K]            | K13(iTRAQ4plex)                | 1 | 1 |
| [K].kLVPFATELHER.[L]             | N-Term(iTRAQ4plex); K1(iTRAQ4  | 1 | 1 |
| [R].ISASAEELR.[Q]                |                                | 1 | 1 |
| [K].LVPFATELHER.[L]              |                                | 1 | 1 |
| [K].aLVQQMEQLR.[Q]               | N-Term(iTRAQ4plex)             | 1 | 1 |
| [R].TQVNTQAEQLR.[R]              |                                | 1 | 1 |
| [R].ISASAEELRQR.[L]              |                                | 1 | 1 |
| [K].sLAELGGHLDQQVEEFR.[R]        | N-Term(iTRAQ4plex)             | 1 | 1 |
| [K].sLAELGGHLDQQVEEFR.[R]        | N-Term(iTRAQ4plex)             | 1 | 1 |
| [K].sLAELGGHLDQQVEEFR.[R]        | N-Term(iTRAQ4plex)             | 1 | 1 |
| [R].tQVNTQAEQLR.[R]              | N-Term(iTRAQ4plex)             | 1 | 1 |
| [R].tQVNTQAEQLR.[R]              | N-Term(iTRAQ4plex)             | 1 | 1 |
| [R].tQVNTQAEQLR.[R]              | N-Term(iTRAQ4plex)             | 1 | 1 |
| [R].tQVNTQAEQLR.[R]              | N-Term(iTRAQ4plex)             | 1 | 1 |
| [K].IDQTVEELR.[R]                |                                | 1 | 1 |
| [K].iDQNVEELk.[G]                | N-Term(iTRAQ4plex); K9(iTRAQ4  | 1 | 1 |
| [K].iDQNVEELk.[G]                | N-Term(iTRAQ4plex); K9(iTRAQ4  | 1 | 1 |
| [K].iDQNVEELk.[G]                | N-Term(iTRAQ4plex); K9(iTRAQ4  | 1 | 1 |
| [K].iDQTVEELR.[R]                | N-Term(iTRAQ4plex)             | 1 | 1 |

|                            |                               |   |   |
|----------------------------|-------------------------------|---|---|
| [K].eAVEHLQk.[S]           | N-Term(iTRAQ4plex); K8(iTRAQ4 | 1 | 1 |
| [K].eAVEHLQk.[S]           | N-Term(iTRAQ4plex); K8(iTRAQ4 | 1 | 1 |
| [K].eAVEHLQk.[S]           | N-Term(iTRAQ4plex); K8(iTRAQ4 | 1 | 1 |
| [K].eAVEHLQk.[S]           | N-Term(iTRAQ4plex); K8(iTRAQ4 | 1 | 1 |
| [R].gNTEGLQk.[S]           | N-Term(iTRAQ4plex); K8(iTRAQ4 | 1 | 1 |
| [R].rVEPYGENFNk.[A]        | N-Term(iTRAQ4plex); K11(iTRAQ | 1 | 1 |
| [R].rVEPYGENFNk.[A]        | N-Term(iTRAQ4plex); K11(iTRAQ | 1 | 1 |
| [R].rVEPYGENFNk.[A]        | N-Term(iTRAQ4plex); K11(iTRAQ | 1 | 1 |
| [K].kNAEELk.[A]            | N-Term(iTRAQ4plex); K1(iTRAQ4 | 1 | 1 |
| [R].LAPLAEDVR.[G]          |                               | 1 | 1 |
| [R].iSASAEELR.[Q]          | N-Term(iTRAQ4plex)            | 1 | 1 |
| [R].sLAPYAQDTQEk.[L]       | N-Term(iTRAQ4plex); K12(iTRAQ | 1 | 1 |
| [R].sLAPYAQDTQEk.[L]       | N-Term(iTRAQ4plex); K12(iTRAQ | 1 | 1 |
| [R].sLAPYAQDTQEk.[L]       | N-Term(iTRAQ4plex); K12(iTRAQ | 1 | 1 |
| [K].IGEVTYAGDLQk.[K]       | N-Term(iTRAQ4plex); K13(iTRAQ | 1 | 1 |
| [R].TQVNTQAEQLR.[R]        |                               | 1 | 1 |
| [R].TQVNTQAEQLR.[R]        |                               | 1 | 1 |
| [R].eNADSLQASLRPHADELk.[A] | N-Term(iTRAQ4plex); K18(iTRAQ | 1 | 1 |
| [R].TQVNTQAEQLR.[R]        |                               | 1 | 1 |
| [R].eNADSLQASLRPHADELk.[A] | N-Term(iTRAQ4plex); K18(iTRAQ | 1 | 1 |
| [K].IGEVTYAGDLQk.[K]       | N-Term(iTRAQ4plex); K13(iTRAQ | 1 | 1 |
| [R].ITPYADEFk.[V]          | N-Term(iTRAQ4plex); K9(iTRAQ4 | 1 | 1 |
| [R].dkVNSFFSTFk.[E]        | N-Term(iTRAQ4plex); K2(iTRAQ4 | 1 | 1 |
| [R].ISASAEELR.[Q]          |                               | 1 | 1 |
| [R].dkVNSFFSTFk.[E]        | N-Term(iTRAQ4plex); K2(iTRAQ4 | 1 | 1 |
| [R].IEPYADQLR.[T]          | N-Term(iTRAQ4plex)            | 1 | 1 |
| [R].IAPLAEDVR.[G]          | N-Term(iTRAQ4plex)            | 1 | 1 |
| [K].INHQLEGLTFQmk.[K]      | N-Term(iTRAQ4plex); K13(iTRAQ | 1 | 1 |
| [K].INHQLEGLTFQmk.[K]      | N-Term(iTRAQ4plex); K13(iTRAQ | 1 | 1 |
| [R].rVEPYGENFNk.[A]        | N-Term(iTRAQ4plex); K11(iTRAQ | 1 | 1 |
| [K].iDQNVEELkGR.[L]        | N-Term(iTRAQ4plex); K9(iTRAQ4 | 1 | 1 |
| [R].sLAPYAQDTQEk.[L]       | N-Term(iTRAQ4plex); K12(iTRAQ | 1 | 1 |
| [K].eAVEHLQk.[S]           | N-Term(iTRAQ4plex); K8(iTRAQ4 | 1 | 1 |
| [K].eAVEHLQk.[S]           | N-Term(iTRAQ4plex); K8(iTRAQ4 | 1 | 1 |
| [K].IGEVTYAGDLQk.[K]       | N-Term(iTRAQ4plex); K13(iTRAQ | 1 | 1 |
| [K].LNHQLEGLTFQmk.[K]      | M12(Oxidation); K13(iTRAQ4ple | 1 | 1 |
| [K].INHQLEGLTFQmk.[K]      | N-Term(iTRAQ4plex); M12(Oxida | 1 | 1 |
| [K].ALVQQMEQLR.[Q]         |                               | 1 | 1 |
| [R].iSASAEELR.[Q]          | N-Term(iTRAQ4plex)            | 1 | 1 |
| [R].eNADSLQASLRPHADELk.[A] | N-Term(iTRAQ4plex); K18(iTRAQ | 1 | 1 |
| [R].LAPLAEDVR.[G]          |                               | 1 | 1 |
| [R].gNTEGLQk.[S]           | N-Term(iTRAQ4plex); K8(iTRAQ4 | 1 | 1 |
| [K].eAVEHLQk.[S]           | N-Term(iTRAQ4plex); K8(iTRAQ4 | 1 | 1 |
| [K].sELTQQLNALFQdk.[L]     | N-Term(iTRAQ4plex); K14(iTRAQ | 1 | 1 |
| [R].ILPHANEVSQk.[I]        | N-Term(iTRAQ4plex); K11(iTRAQ | 1 | 1 |
| [R].LLPHANEVSQk.[I]        | K11(iTRAQ4plex)               | 1 | 1 |
| [R].rVEPYGENFNk.[A]        | N-Term(iTRAQ4plex); K11(iTRAQ | 1 | 1 |
| [K].IGPHAGDVEGHLSFlek.[D]  | N-Term(iTRAQ4plex); K17(iTRAQ | 1 | 1 |
| [R].rVEPYGENFNk.[A]        | N-Term(iTRAQ4plex); K11(iTRAQ | 1 | 1 |
| [K].vNSFFSTFk.[E]          | N-Term(iTRAQ4plex); K9(iTRAQ4 | 1 | 1 |
| [R].gNTEGLQk.[S]           | N-Term(iTRAQ4plex); K8(iTRAQ4 | 1 | 1 |
| [K].eAVEHLQk.[S]           | N-Term(iTRAQ4plex); K8(iTRAQ4 | 1 | 1 |

|                                |                                     |   |   |
|--------------------------------|-------------------------------------|---|---|
| [K].sELTQQLNALFQDk.[L]         | N-Term(iTRAQ4plex); K14(iTRAQ4plex) | 1 | 1 |
| [R].ISASAEELR.[Q]              |                                     | 1 | 1 |
| [K].aLVQQmEQLR.[Q]             | N-Term(iTRAQ4plex); M6(Oxidation)   | 1 | 1 |
| [R].iSASAEELR.[Q]              | N-Term(iTRAQ4plex)                  | 1 | 1 |
| [R].gNTEGLQk.[S]               | N-Term(iTRAQ4plex); K8(iTRAQ4plex)  | 1 | 1 |
| [R].gNTEGLQk.[S]               | N-Term(iTRAQ4plex); K8(iTRAQ4plex)  | 1 | 1 |
| [R].LLPHANEVSQk.[I]            | K11(iTRAQ4plex)                     | 1 | 1 |
| [K].IVPFATELHER.[L]            | N-Term(iTRAQ4plex)                  | 1 | 1 |
| [R].TQVNTQAEQLR.[R]            |                                     | 1 | 1 |
| [K].iDQTVEELR.[R]              | N-Term(iTRAQ4plex)                  | 1 | 1 |
| [K].IDQNVEELk.[G]              | K9(iTRAQ4plex)                      | 1 | 1 |
| [R].RQLTPYAQR.[M]              |                                     | 1 | 1 |
| [K].aLVQQmEQLR.[Q]             | N-Term(iTRAQ4plex); M6(Oxidation)   | 1 | 1 |
| [K].iDQNVEELk.[G]              | N-Term(iTRAQ4plex); K9(iTRAQ4plex)  | 1 | 1 |
| [R].LTPYADEFk.[V]              | K9(iTRAQ4plex)                      | 1 | 1 |
| [R].LEPYADQLR.[T]              | N-Term(iTRAQ4plex)                  | 1 | 1 |
| [K].IkEEIGk.[LE]               | N-Term(iTRAQ4plex); K2(iTRAQ4plex)  | 1 | 1 |
| [K].kLVPFATELHER.[L]           | N-Term(iTRAQ4plex); K1(iTRAQ4plex)  | 1 | 1 |
| [R].TQVNTQAEQLR.[R]            |                                     | 1 | 1 |
| [K].EAVEHLQk.[S]               | K8(iTRAQ4plex)                      | 1 | 1 |
| [K].vNSFFSTFk.[E]              | N-Term(iTRAQ4plex); K9(iTRAQ4plex)  | 1 | 1 |
| [R].dkVNSFFSTFk.[E]            | N-Term(iTRAQ4plex); K2(iTRAQ4plex)  | 1 | 1 |
| [R].gNTEGLQk.[S]               | N-Term(iTRAQ4plex); K8(iTRAQ4plex)  | 1 | 1 |
| [K].INHQLEGLTFQmKk.[N]         | N-Term(iTRAQ4plex); M12(Oxidation)  | 1 | 1 |
| [K].LVPFATELHER.[L]            |                                     | 1 | 1 |
| [K].sLAELGGHLDQQVEEFR.[R]      | N-Term(iTRAQ4plex)                  | 1 | 1 |
| [R].LEPYADQLR.[T]              |                                     | 1 | 1 |
| [R].vEPYGENFNk.[A]             | N-Term(iTRAQ4plex); K10(iTRAQ4plex) | 1 | 1 |
| [K].sLAELGGHLDQQVEEFR.[R]      |                                     | 1 | 1 |
| [K].aLVQQMEQLR.[Q]             | N-Term(iTRAQ4plex)                  | 1 | 1 |
| [R].LTPYADEFk.[V]              | K9(iTRAQ4plex)                      | 1 | 1 |
| [R].IAPLAEDVR.[G]              | N-Term(iTRAQ4plex)                  | 1 | 1 |
| [K].IkEEIGk.[LE]               | N-Term(iTRAQ4plex); K2(iTRAQ4plex)  | 1 | 1 |
| [R].tQVNTQAEQLR.[R]            | N-Term(iTRAQ4plex)                  | 1 | 1 |
| [R].ISASAEELRQR.[L]            |                                     | 1 | 1 |
| [R].iSASAEELR.[Q]              | N-Term(iTRAQ4plex)                  | 1 | 1 |
| [R].ITPYADEFk.[V]              | N-Term(iTRAQ4plex); K9(iTRAQ4plex)  | 1 | 1 |
| [R].ILPHANEVSQk.[I]            | N-Term(iTRAQ4plex); K11(iTRAQ4plex) | 1 | 1 |
| [K].iDQTVEELR.[R]              | N-Term(iTRAQ4plex)                  | 1 | 1 |
| [K].IVPFATELHER.[L]            | N-Term(iTRAQ4plex)                  | 1 | 1 |
| [R].rVEPYGENFNk.[A]            | N-Term(iTRAQ4plex); K11(iTRAQ4plex) | 1 | 1 |
| [K].IkEEIGk.[LE]               | N-Term(iTRAQ4plex); K2(iTRAQ4plex)  | 1 | 1 |
| [K].INHQLEGLTFQMk.[K]          | N-Term(iTRAQ4plex); K13(iTRAQ4plex) | 1 | 1 |
| [R].LEPYADQLR.[T]              |                                     | 1 | 1 |
| [R].ISASAEELR.[Q]              |                                     | 1 | 1 |
| [R].vEPYGENFNk.[A]             | N-Term(iTRAQ4plex); K10(iTRAQ4plex) | 1 | 1 |
| [K].svGSQWASPENPcLINEcVR.[V]   | N-Term(iTRAQ4plex); C13(Carbamoyl)  | 1 | 1 |
| [K].svGSQWASPENPcLINEcVR.[V]   | N-Term(iTRAQ4plex); C13(Carbamoyl)  | 1 | 1 |
| [K].aFVLSSVDELEQQR.[D]         | N-Term(iTRAQ4plex)                  | 1 | 1 |
| [K].aFVLSSVDELEQQR.[D]         | N-Term(iTRAQ4plex)                  | 1 | 1 |
| [R].iLAGPAGDSNVVk.[L]          | N-Term(iTRAQ4plex); K13(iTRAQ4plex) | 1 | 1 |
| [R].IPGDIQVVPiGVGNANVQELER.[I] | N-Term(iTRAQ4plex)                  | 1 | 1 |

|                                    |                                |   |   |
|------------------------------------|--------------------------------|---|---|
| [K].aVVILVTDVSVDSVDAADAAR.[S]      | N-Term(iTRAQ4plex)             | 1 | 1 |
| [R].icMDEdGNEk.[R]                 | N-Term(iTRAQ4plex); C2(Carbam  | 1 | 1 |
| [R].gLRPScPNSQSPVk.[V]             | N-Term(iTRAQ4plex); C6(Carbam  | 1 | 1 |
| [R].vSPSPcPPHR.[L]                 | N-Term(iTRAQ4plex); C6(Carbam  | 1 | 1 |
| [K].qHSDPcALNPR.[M]                | N-Term(iTRAQ4plex); C6(Carbam  | 1 | 1 |
| [K].eFMEEVIQR.[M]                  | N-Term(iTRAQ4plex)             | 1 | 1 |
| [K].eFMEEVIQR.[M]                  | N-Term(iTRAQ4plex)             | 1 | 1 |
| [R].aEGLEcTk.[T]                   | N-Term(iTRAQ4plex); C6(Carbam  | 1 | 1 |
| [R].yIILLLGk.[A]                   | N-Term(iTRAQ4plex); K8(iTRAQ4  | 1 | 1 |
| [K].yAGSQVASTSEVLk.[Y]             | N-Term(iTRAQ4plex); K14(iTRAQ  | 1 | 1 |
| [R].skEFMEEVIQR.[M]                | N-Term(iTRAQ4plex); K2(iTRAQ4  | 1 | 1 |
| [K].aHLLSLVDVMQR.[E]               | N-Term(iTRAQ4plex)             | 1 | 1 |
| [R].gDSQSSWk.[S]                   | N-Term(iTRAQ4plex); K8(iTRAQ4  | 1 | 1 |
| [K].eYAPGETVk.[I]                  | N-Term(iTRAQ4plex); K9(iTRAQ4  | 1 | 1 |
| [R].cPcFHQGk.[E]                   | N-Term(iTRAQ4plex); C1(Carbam  | 1 | 1 |
| [K].aLSVWVDR.[H]                   | N-Term(iTRAQ4plex)             | 1 | 1 |
| [R].dETLQDGcDTHFck.[V]             | N-Term(iTRAQ4plex); C8(Carbam  | 1 | 1 |
| [R].vkEEVFIQQR.[N]                 | N-Term(iTRAQ4plex); K2(iTRAQ4  | 1 | 1 |
| [R].sLScRPPMVk.[L]                 | N-Term(iTRAQ4plex); C4(Carbam  | 1 | 1 |
| [K].tTcNPcPLGYk.[E]                | N-Term(iTRAQ4plex); C3(Carbam  | 1 | 1 |
| [R].eQAPNLVYMVTGNPASDEIk.[R]       | N-Term(iTRAQ4plex); K20(iTRAQ  | 1 | 1 |
| [K].gcSHPSVk.[C]                   | N-Term(iTRAQ4plex); C2(Carbam  | 1 | 1 |
| [K].rPGDVWTLDPDQcHTVTcQPDGQTLk.[S] | N-Term(iTRAQ4plex); C12(Carbar | 1 | 1 |
| [R].sLScRPPMVk.[L]                 | N-Term(iTRAQ4plex); C4(Carbam  | 1 | 1 |
| [R].aEGLEcTk.[T]                   | N-Term(iTRAQ4plex); C6(Carbam  | 1 | 1 |
| [R].gGQIMTLk.[R]                   | N-Term(iTRAQ4plex); K8(iTRAQ4  | 1 | 1 |
| [R].ILDLVFLLDGSSR.[L]              | N-Term(iTRAQ4plex)             | 1 | 1 |
| [R].tNTGLALR.[Y]                   | N-Term(iTRAQ4plex)             | 1 | 1 |
| [K].aPTcGLcEVAR.[L]                | N-Term(iTRAQ4plex); C4(Carbam  | 1 | 1 |
| [K].gLWEQcQLLk.[S]                 | N-Term(iTRAQ4plex); C6(Carbam  | 1 | 1 |
| [R].sGFTYVLHEGEccGR.[C]            | N-Term(iTRAQ4plex); C12(Carbar | 1 | 1 |
| [K].ISGEAYGFVAR.[I]                | N-Term(iTRAQ4plex)             | 1 | 1 |
| [R].YGLVTYATYPk.[I]                | K11(iTRAQ4plex)                | 1 | 1 |
| [R].dLLYIGk.[D]                    | N-Term(iTRAQ4plex); K7(iTRAQ4  | 1 | 1 |
| [K].vASYGVkPR.[Y]                  | N-Term(iTRAQ4plex); K7(iTRAQ4  | 1 | 1 |
| [K].vkDISEVVTPr.[F]                | N-Term(iTRAQ4plex); K2(iTRAQ4  | 1 | 1 |
| [K].eAGIPEFYDYDVALIk.[L]           | N-Term(iTRAQ4plex); K16(iTRAQ  | 1 | 1 |
| [K].eAGIPEFYDYDVALIk.[L]           | N-Term(iTRAQ4plex); K16(iTRAQ  | 1 | 1 |
| [K].eAGIPEFYDYDVALIk.[L]           | N-Term(iTRAQ4plex); K16(iTRAQ  | 1 | 1 |
| [K].kDNEQHVFk.[V]                  | N-Term(iTRAQ4plex); K1(iTRAQ4  | 1 | 1 |
| [R].sTGSWSTLk.[T]                  | N-Term(iTRAQ4plex); K9(iTRAQ4  | 1 | 1 |
| [R].sTGSWSTLk.[T]                  | N-Term(iTRAQ4plex); K9(iTRAQ4  | 1 | 1 |
| [K].vASYGVkPR.[Y]                  | N-Term(iTRAQ4plex); K7(iTRAQ4  | 1 | 1 |
| [K].eAGIPEFYDYDVALIk.[L]           | N-Term(iTRAQ4plex); K16(iTRAQ  | 1 | 1 |
| [K].vASYGVkPR.[Y]                  | N-Term(iTRAQ4plex); K7(iTRAQ4  | 1 | 1 |
| [K].vASYGVkPR.[Y]                  | N-Term(iTRAQ4plex); K7(iTRAQ4  | 1 | 1 |
| [K].kcLVNLIek.[V]                  | N-Term(iTRAQ4plex); K1(iTRAQ4  | 1 | 1 |
| [K].yGQTIRPIcLPcTEGTR.[A]          | N-Term(iTRAQ4plex); C9(Carbam  | 1 | 1 |
| [K].vASYGVkPR.[Y]                  | N-Term(iTRAQ4plex); K7(iTRAQ4  | 1 | 1 |
| [K].iSVIRPSk.[G]                   | N-Term(iTRAQ4plex); K8(iTRAQ4  | 1 | 1 |
| [K].iSVIRPSk.[G]                   | N-Term(iTRAQ4plex); K8(iTRAQ4  | 1 | 1 |
| [K].iSVIRPSk.[G]                   | N-Term(iTRAQ4plex); K8(iTRAQ4  | 1 | 1 |

|                                     |                                |   |   |
|-------------------------------------|--------------------------------|---|---|
| [K].iSVIRPSk.[G]                    | N-Term(iTRAQ4plex); K8(iTRAQ4  | 1 | 1 |
| [K].iSVIRPSk.[G]                    | N-Term(iTRAQ4plex); K8(iTRAQ4  | 1 | 1 |
| [K].kDNEQHVFk.[V]                   | N-Term(iTRAQ4plex); K1(iTRAQ4  | 1 | 1 |
| [R].fLcTGGVSPYADPNTcR.[G]           | N-Term(iTRAQ4plex); C3(Carbam  | 1 | 1 |
| [R].fLcTGGVSPYADPNTcR.[G]           | N-Term(iTRAQ4plex); C3(Carbam  | 1 | 1 |
| [R].fLcTGGVSPYADPNTcR.[G]           | N-Term(iTRAQ4plex); C3(Carbam  | 1 | 1 |
| [R].fLcTGGVSPYADPNTcR.[G]           | N-Term(iTRAQ4plex); C3(Carbam  | 1 | 1 |
| [K].cLVNLIk.[V]                     | N-Term(iTRAQ4plex); C1(Carbam  | 1 | 1 |
| [R].yGLVTYATYPk.[I]                 | N-Term(iTRAQ4plex); K11(iTRAQ  | 1 | 1 |
| [R].yGLVTYATYPk.[I]                 | N-Term(iTRAQ4plex); K11(iTRAQ  | 1 | 1 |
| [K].vkDISEVTPR.[F]                  | N-Term(iTRAQ4plex); K2(iTRAQ4  | 1 | 1 |
| [R].gDSGGPLIVHkR.[S]                | N-Term(iTRAQ4plex); K11(iTRAQ  | 1 | 1 |
| [K].vASYGVkPR.[Y]                   | N-Term(iTRAQ4plex); K7(iTRAQ4  | 1 | 1 |
| [K].gHEScMGAVVSEYFVLTAAhcFTVDDk.[E] | N-Term(iTRAQ4plex); C5(Carbam  | 1 | 1 |
| [K].keAGIPEFYDYDVALIk.[L]           | N-Term(iTRAQ4plex); K1(iTRAQ4  | 1 | 1 |
| [K].keAGIPEFYDYDVALIk.[L]           | N-Term(iTRAQ4plex); K1(iTRAQ4  | 1 | 1 |
| [K].keAGIPEFYDYDVALIk.[L]           | N-Term(iTRAQ4plex); K1(iTRAQ4  | 1 | 1 |
| [R].ILQEGQALEYVcPSGFYPYPVQTR.[T]    | N-Term(iTRAQ4plex); C12(Carbar | 1 | 1 |
| [K].QLNEINYEDHk.[L]                 | K11(iTRAQ4plex)                | 1 | 1 |
| [K].eELLPADIK.[A]                   | N-Term(iTRAQ4plex); K10(iTRAQ  | 1 | 1 |
| [K].eELLPADIK.[A]                   | N-Term(iTRAQ4plex); K10(iTRAQ  | 1 | 1 |
| [R].hVILMTDGLHNMGGDPITVIDEIR.[D]    |                                | 1 | 1 |
| [R].hVILMTDGLHNMGGDPITVIDEIR.[D]    | N-Term(iTRAQ4plex)             | 1 | 1 |
| [R].hVILMTDGLHNMGGDPITVIDEIR.[D]    | N-Term(iTRAQ4plex)             | 1 | 1 |
| [K].vSEADSSNADWVtk.[Q]              | N-Term(iTRAQ4plex); K14(iTRAQ  | 1 | 1 |
| [K].vSEADSSNADWVtk.[Q]              | N-Term(iTRAQ4plex); K14(iTRAQ  | 1 | 1 |
| [K].vSEADSSNADWVtk.[Q]              | N-Term(iTRAQ4plex); K14(iTRAQ  | 1 | 1 |
| [K].aLFVSEEEK.[K]                   | N-Term(iTRAQ4plex); K9(iTRAQ4  | 1 | 1 |
| [K].aLFVSEEEK.[K]                   | N-Term(iTRAQ4plex); K9(iTRAQ4  | 1 | 1 |
| [R].dAQYAPGYDk.[V]                  | N-Term(iTRAQ4plex); K10(iTRAQ  | 1 | 1 |
| [R].dAQYAPGYDk.[V]                  | N-Term(iTRAQ4plex); K10(iTRAQ  | 1 | 1 |
| [K].kDNEQHVFk.[V]                   | N-Term(iTRAQ4plex); K1(iTRAQ4  | 1 | 1 |
| [K].kDNEQHVFk.[V]                   | N-Term(iTRAQ4plex); K1(iTRAQ4  | 1 | 1 |
| [R].ILQEGQALEYVcPSGFYPYPVQTR.[T]    | N-Term(iTRAQ4plex); C12(Carbar | 1 | 1 |
| [R].gDSGGPLIVHkR.[S]                | N-Term(iTRAQ4plex); K11(iTRAQ  | 1 | 1 |
| [R].LEDsvTYHcSR.[G]                 | C9(Carbamidomethyl)            | 1 | 1 |
| [R].hVILMTDGLHNMGGDPITVIDEIR.[D]    | N-Term(iTRAQ4plex)             | 1 | 1 |
| [R].hVILMTDGLHNMGGDPITVIDEIR.[D]    |                                | 1 | 1 |
| [R].ILQEGQALEYVcPSGFYPYPVQTR.[T]    | N-Term(iTRAQ4plex); C12(Carbar | 1 | 1 |
| [K].ekLQDEDLGFL.[-]                 | N-Term(iTRAQ4plex); K2(iTRAQ4  | 1 | 1 |
| [K].ekLQDEDLGFL.[-]                 | N-Term(iTRAQ4plex); K2(iTRAQ4  | 1 | 1 |
| [K].qLNEINYEDHk.[L]                 | N-Term(iTRAQ4plex); K11(iTRAQ  | 1 | 1 |
| [K].qLNEINYEDHk.[L]                 | N-Term(iTRAQ4plex); K11(iTRAQ  | 1 | 1 |
| [K].qLNEINYEDHk.[L]                 | N-Term(iTRAQ4plex); K11(iTRAQ  | 1 | 1 |
| [R].GDSGGPLIVHk.[R]                 | K11(iTRAQ4plex)                | 1 | 1 |
| [K].kDNEQHVFk.[V]                   | N-Term(iTRAQ4plex); K1(iTRAQ4  | 1 | 1 |
| [R].LEDsvTYHcSR.[G]                 | N-Term(iTRAQ4plex); C9(Carbam  | 1 | 1 |
| [K].aLFVSEEEKk.[L]                  | N-Term(iTRAQ4plex); K9(iTRAQ4  | 1 | 1 |
| [K].dISEVTPR.[F]                    | N-Term(iTRAQ4plex)             | 1 | 1 |
| [R].DFHINLFQVLPWLk.[E]              | K14(iTRAQ4plex)                | 1 | 1 |
| [R].DFHINLFQVLPWLk.[E]              | K14(iTRAQ4plex)                | 1 | 1 |
| [R].eDYLDVYVFGVGPLVNQVNNALASK.[K]   | N-Term(iTRAQ4plex); K26(iTRAQ  | 1 | 1 |

|                                     |                                           |   |   |
|-------------------------------------|-------------------------------------------|---|---|
| [R].eDYLDVYVFGVGPLVNQVNINALASK.[K]  | N-Term(iTRAQ4plex); K26(iTRAQ4plex)       | 1 | 1 |
| [R].gDSGGPLIVHk.[R]                 | N-Term(iTRAQ4plex); K11(iTRAQ4plex)       | 1 | 1 |
| [R].gDSGGPLIVHk.[R]                 | N-Term(iTRAQ4plex); K11(iTRAQ4plex)       | 1 | 1 |
| [R].IPPTTTcQQQk.[E]                 | N-Term(iTRAQ4plex); C7(Carbamidomethyl)   | 1 | 1 |
| [R].IPPTTTcQQQk.[E]                 | N-Term(iTRAQ4plex); C7(Carbamidomethyl)   | 1 | 1 |
| [R].gDSGGPLIVHk.[R]                 | N-Term(iTRAQ4plex); K11(iTRAQ4plex)       | 1 | 1 |
| [R].IPPTTTcQQQk.[E]                 | N-Term(iTRAQ4plex); C7(Carbamidomethyl)   | 1 | 1 |
| [R].IEDSVTYHcSR.[G]                 | N-Term(iTRAQ4plex); C9(Carbamidomethyl)   | 1 | 1 |
| [R].DAQYAPGYdk.[V]                  | K10(iTRAQ4plex)                           | 1 | 1 |
| [R].fiQVGVISWGVVDVck.[N]            | N-Term(iTRAQ4plex); C15(Carbamidomethyl)  | 1 | 1 |
| [R].fiQVGVISWGVVDVck.[N]            | N-Term(iTRAQ4plex); C15(Carbamidomethyl)  | 1 | 1 |
| [R].LPPTTTcQQQk.[E]                 | C7(Carbamidomethyl); K11(iTRAQ4plex)      | 1 | 1 |
| [K].gHEScMGAVVSEYFVLTAAhcFTVDDk.[E] | N-Term(iTRAQ4plex); C5(Carbamidomethyl)   | 1 | 1 |
| [K].yGQTIrPIcLPcTEGTTR.[A]          | N-Term(iTRAQ4plex); C9(Carbamidomethyl)   | 1 | 1 |
| [K].kdNEQHVFk.[V]                   | N-Term(iTRAQ4plex); K1(iTRAQ4plex)        | 1 | 1 |
| [R].fLcTGGVSPYADPNTcR.[G]           | N-Term(iTRAQ4plex); C3(Carbamidomethyl)   | 1 | 1 |
| [K].dISEVVTPR.[F]                   | N-Term(iTRAQ4plex)                        | 1 | 1 |
| [K].IQDEDLGFL.[-]                   | N-Term(iTRAQ4plex)                        | 1 | 1 |
| [K].EELLPAQDIk.[A]                  | K10(iTRAQ4plex)                           | 1 | 1 |
| [K].eAGIPEFYDYDVALIk.[L]            | N-Term(iTRAQ4plex); K16(iTRAQ4plex)       | 1 | 1 |
| [K].ekIQDEDLGFL.[-]                 | N-Term(iTRAQ4plex); K2(iTRAQ4plex)        | 1 | 1 |
| [K].iSVIRPSk.[G]                    | N-Term(iTRAQ4plex); K8(iTRAQ4plex)        | 1 | 1 |
| [R].IPPTTTcQQQk.[E]                 | N-Term(iTRAQ4plex); C7(Carbamidomethyl)   | 1 | 1 |
| [K].dISEVVTPR.[F]                   | N-Term(iTRAQ4plex)                        | 1 | 1 |
| [K].dISEVVTPR.[F]                   | N-Term(iTRAQ4plex)                        | 1 | 1 |
| [K].eELLPAQDIk.[A]                  | N-Term(iTRAQ4plex); K10(iTRAQ4plex)       | 1 | 1 |
| [R].daqYAPGYdk.[V]                  | N-Term(iTRAQ4plex); K10(iTRAQ4plex)       | 1 | 1 |
| [K].aLFVSEEEK.[K]                   | N-Term(iTRAQ4plex); K9(iTRAQ4plex)        | 1 | 1 |
| [K].yGQTIrPIcLPcTEGTTR.[A]          | N-Term(iTRAQ4plex); C9(Carbamidomethyl)   | 1 | 1 |
| [R].daqYAPGYdk.[V]                  | N-Term(iTRAQ4plex); K10(iTRAQ4plex)       | 1 | 1 |
| [R].fiQVGVISWGVVDVck.[N]            | N-Term(iTRAQ4plex); C15(Carbamidomethyl)  | 1 | 1 |
| [K].kdNEQHVFk.[V]                   | N-Term(iTRAQ4plex); K1(iTRAQ4plex)        | 1 | 1 |
| [K].dNEQHVFk.[V]                    | N-Term(iTRAQ4plex); K8(iTRAQ4plex)        | 1 | 1 |
| [R].dLLYIGk.[D]                     | N-Term(iTRAQ4plex); K7(iTRAQ4plex)        | 1 | 1 |
| [R].gDSGGPLIVHkR.[S]                | N-Term(iTRAQ4plex); K11(iTRAQ4plex)       | 1 | 1 |
| [K].IQDEDLGFL.[-]                   | N-Term(iTRAQ4plex)                        | 1 | 1 |
| [R].FLcTGGVSPYADPNTcR.[G]           | C3(Carbamidomethyl); C16(Carbamidomethyl) | 1 | 1 |
| [R].daqYAPGYdk.[V]                  | N-Term(iTRAQ4plex); K10(iTRAQ4plex)       | 1 | 1 |
| [K].eELLPAQDIk.[A]                  | N-Term(iTRAQ4plex); K10(iTRAQ4plex)       | 1 | 1 |
| [R].dLLYIGk.[D]                     | N-Term(iTRAQ4plex); K7(iTRAQ4plex)        | 1 | 1 |
| [K].vASYGVkPR.[Y]                   | N-Term(iTRAQ4plex); K7(iTRAQ4plex)        | 1 | 1 |
| [R].sTGSWSTLk.[T]                   | N-Term(iTRAQ4plex); K9(iTRAQ4plex)        | 1 | 1 |
| [K].kdNEQHVFk.[V]                   | N-Term(iTRAQ4plex); K1(iTRAQ4plex)        | 1 | 1 |
| [R].IEDSVTYHcSR.[G]                 | N-Term(iTRAQ4plex); C9(Carbamidomethyl)   | 1 | 1 |
| [K].kdNEQHVFk.[V]                   | N-Term(iTRAQ4plex); K1(iTRAQ4plex)        | 1 | 1 |
| [K].kdNEQHVFk.[V]                   | N-Term(iTRAQ4plex); K1(iTRAQ4plex)        | 1 | 1 |
| [K].yGQTIrPIcLPcTEGTTR.[A]          | N-Term(iTRAQ4plex); C9(Carbamidomethyl)   | 1 | 1 |
| [K].dNEQHVFk.[V]                    | N-Term(iTRAQ4plex); K8(iTRAQ4plex)        | 1 | 1 |
| [R].yGLVTYATYPk.[I]                 | N-Term(iTRAQ4plex); K11(iTRAQ4plex)       | 1 | 1 |
| [K].vSVGGEK.[R]                     | N-Term(iTRAQ4plex); K7(iTRAQ4plex)        | 1 | 1 |
| [K].kdNEQHVFk.[V]                   | N-Term(iTRAQ4plex); K1(iTRAQ4plex)        | 1 | 1 |
| [K].ISVIRPSk.[G]                    | K8(iTRAQ4plex)                            | 1 | 1 |

|                          |                                |   |   |
|--------------------------|--------------------------------|---|---|
| [K].dNEQHVFk.[V]         | N-Term(iTRAQ4plex); K8(iTRAQ4  | 1 | 1 |
| [R].IPPTTTCQQQk.[E]      | N-Term(iTRAQ4plex); C7(Carbam  | 1 | 1 |
| [K].eAGIPEFYDYDVALIk.[L] | N-Term(iTRAQ4plex); K16(iTRAQ  | 1 | 1 |
| [R].yGLVTYATYPk.[I]      | N-Term(iTRAQ4plex); K11(iTRAQ  | 1 | 1 |
| [K].eAGIPEFYDYDVALIk.[L] | N-Term(iTRAQ4plex); K16(iTRAQ  | 1 | 1 |
| [R].dLLYIGk.[D]          | N-Term(iTRAQ4plex); K7(iTRAQ4  | 1 | 1 |
| [K].kDNEQHVFk.[V]        | N-Term(iTRAQ4plex); K1(iTRAQ4  | 1 | 1 |
| [K].vSEADSSNADWVtk.[Q]   | N-Term(iTRAQ4plex); K14(iTRAQ  | 1 | 1 |
| [K].vSVGGEk.[R]          | N-Term(iTRAQ4plex); K7(iTRAQ4  | 1 | 1 |
| [K].iSVIRPSk.[G]         | N-Term(iTRAQ4plex); K8(iTRAQ4  | 1 | 1 |
| [R].STGSWSTLk.[T]        | K9(iTRAQ4plex)                 | 1 | 1 |
| [R].kGTDYHk.[Q]          | N-Term(iTRAQ4plex); K1(iTRAQ4  | 1 | 1 |
| [R].dLLYIGk.[D]          | N-Term(iTRAQ4plex); K7(iTRAQ4  | 1 | 1 |
| [K].VASYGVkPR.[Y]        | K7(iTRAQ4plex)                 | 1 | 1 |
| [R].gDSGGPLIVHk.[R]      | N-Term(iTRAQ4plex); K11(iTRAQ  | 1 | 1 |
| [R].IPPTTTCQQQk.[E]      | N-Term(iTRAQ4plex); C7(Carbam  | 1 | 1 |
| [K].vSVGGEk.[R]          | N-Term(iTRAQ4plex); K7(iTRAQ4  | 1 | 1 |
| [K].kDNEQHVFk.[V]        | N-Term(iTRAQ4plex); K9(iTRAQ4  | 1 | 1 |
| [K].kDNEQHVFk.[V]        | K1(iTRAQ4plex); K9(iTRAQ4plex) | 1 | 1 |
| [R].IPPTTTCQQQk.[E]      | N-Term(iTRAQ4plex); C7(Carbam  | 1 | 1 |
| [K].vASYGVkPR.[Y]        | N-Term(iTRAQ4plex); K7(iTRAQ4  | 1 | 1 |
| [K].cLVNLIk.[V]          | C1(Carbamidomethyl); K8(iTRAC  | 1 | 1 |
| [R].IPPTTTCQQQk.[E]      | N-Term(iTRAQ4plex); C7(Carbam  | 1 | 1 |
| [R].dLLYIGk.[D]          | N-Term(iTRAQ4plex); K7(iTRAQ4  | 1 | 1 |
| [K].qLNEINYEDHk.[L]      | N-Term(iTRAQ4plex); K11(iTRAQ  | 1 | 1 |
| [K].dISEVVTPR.[F]        | N-Term(iTRAQ4plex)             | 1 | 1 |
| [K].cLVNLIk.[V]          | N-Term(iTRAQ4plex); C1(Carbam  | 1 | 1 |
| [K].aLFVSEEEK.[K]        | N-Term(iTRAQ4plex); K9(iTRAQ4  | 1 | 1 |
| [K].qLNEINYEDHk.[L]      | N-Term(iTRAQ4plex); K11(iTRAQ  | 1 | 1 |
| [R].dLLYIGk.[D]          | N-Term(iTRAQ4plex); K7(iTRAQ4  | 1 | 1 |
| [K].ekLQDEDLGFL.[-]      | N-Term(iTRAQ4plex); K2(iTRAQ4  | 1 | 1 |
| [K].iSVIRPSk.[G]         | N-Term(iTRAQ4plex); K8(iTRAQ4  | 1 | 1 |
| [R].IPPTTTCQQQk.[E]      | N-Term(iTRAQ4plex); C7(Carbam  | 1 | 1 |
| [K].dISEVVTPR.[F]        | N-Term(iTRAQ4plex)             | 1 | 1 |
| [R].gDSGGPLIVHk.[R]      | N-Term(iTRAQ4plex); K11(iTRAQ  | 1 | 1 |
| [R].LPPTTTCQQQk.[E]      | C7(Carbamidomethyl); K11(iTRA  | 1 | 1 |
| [R].IPPTTTCQQQk.[E]      | N-Term(iTRAQ4plex); C7(Carbam  | 1 | 1 |
| [K].dISEVVTPR.[F]        | N-Term(iTRAQ4plex)             | 1 | 1 |
| [K].eELLPAQDIk.[A]       | N-Term(iTRAQ4plex); K10(iTRAQ  | 1 | 1 |
| [K].aLFVSEEEK.[K]        | N-Term(iTRAQ4plex); K9(iTRAQ4  | 1 | 1 |
| [K].vkDISEVVTPR.[F]      | N-Term(iTRAQ4plex); K2(iTRAQ4  | 1 | 1 |
| [K].vSVGGEk.[R]          | N-Term(iTRAQ4plex); K7(iTRAQ4  | 1 | 1 |
| [K].dISEVVTPR.[F]        | N-Term(iTRAQ4plex)             | 1 | 1 |
| [K].vSEADSSNADWVtk.[Q]   | N-Term(iTRAQ4plex); K14(iTRAQ  | 1 | 1 |
| [K].TGLLLSDPdk.[V]       | K11(iTRAQ4plex)                | 1 | 1 |
| [K].TGLLLSDPdk.[V]       | K11(iTRAQ4plex)                | 1 | 1 |
| [R].aNTVQEATFQMELPk.[K]  | N-Term(iTRAQ4plex); K15(iTRAQ  | 1 | 1 |
| [R].aNTVQEATFQMELPk.[K]  | N-Term(iTRAQ4plex); K15(iTRAQ  | 1 | 1 |
| [R].aNTVQEATFQMELPk.[K]  | N-Term(iTRAQ4plex); K15(iTRAQ  | 1 | 1 |
| [R].aNTVQEATFQmELPk.[K]  | N-Term(iTRAQ4plex); M11(Oxida  | 1 | 1 |
| [R].fkPTLSQQQk.[S]       | N-Term(iTRAQ4plex); K2(iTRAQ4  | 1 | 1 |
| [R].nVHSGSTFFk.[Y]       | N-Term(iTRAQ4plex); K10(iTRAQ  | 1 | 1 |



|                                |                               |   |   |
|--------------------------------|-------------------------------|---|---|
| [R].fkPTLSQQQk.[S]             | N-Term(iTRAQ4plex); K2(iTRAQ4 | 1 | 1 |
| [R].fkPTLSQQQk.[S]             | N-Term(iTRAQ4plex); K10(iTRAQ | 1 | 1 |
| [R].FkPTLSQQQk.[S]             | K2(iTRAQ4plex); K10(iTRAQ4ple | 1 | 1 |
| [R].mNFRPGVLSSR.[Q]            | N-Term(iTRAQ4plex)            | 1 | 1 |
| [R].mNFRPGVLSSR.[Q]            | N-Term(iTRAQ4plex)            | 1 | 1 |
| [R].nVHSGSTFFk.[Y]             | N-Term(iTRAQ4plex); K10(iTRAQ | 1 | 1 |
| [R].nVHSGSTFFk.[Y]             | N-Term(iTRAQ4plex); K10(iTRAQ | 1 | 1 |
| [R].fkPTLSQQQk.[S]             | N-Term(iTRAQ4plex); K2(iTRAQ4 | 1 | 1 |
| [R].fkPTLSQQQk.[S]             | N-Term(iTRAQ4plex); K2(iTRAQ4 | 1 | 1 |
| [K].vRPQQLVk.[H]               | N-Term(iTRAQ4plex); K8(iTRAQ4 | 1 | 1 |
| [K].vRPQQLVk.[H]               | N-Term(iTRAQ4plex); K8(iTRAQ4 | 1 | 1 |
| [K].vRPQQLVk.[H]               | N-Term(iTRAQ4plex); K8(iTRAQ4 | 1 | 1 |
| [K].iPkPEASFSPR.[R]            | N-Term(iTRAQ4plex); K3(iTRAQ4 | 1 | 1 |
| [R].mNFRPGVLSSR.[Q]            | N-Term(iTRAQ4plex)            | 1 | 1 |
| [K].nPLVWVHASPEHVVVTR.[N]      | N-Term(iTRAQ4plex)            | 1 | 1 |
| [K].nPLVWVHASPEHVVVTR.[N]      | N-Term(iTRAQ4plex)            | 1 | 1 |
| [R].qGPVNLLSDPEQGVEVTGQYER.[E] | N-Term(iTRAQ4plex)            | 1 | 1 |
| [R].qGPVNLLSDPEQGVEVTGQYER.[E] | N-Term(iTRAQ4plex)            | 1 | 1 |
| [R].qGPVNLLSDPEQGVEVTGQYER.[E] | N-Term(iTRAQ4plex)            | 1 | 1 |
| [K].nPLVWVHASPEHVVVTR.[N]      | N-Term(iTRAQ4plex)            | 1 | 1 |
| [K].nPLVWVHASPEHVVVTR.[N]      | N-Term(iTRAQ4plex)            | 1 | 1 |
| [R].QGPNLLSDPEQGVEVTGQYER.[E]  |                               | 1 | 1 |
| [K].nPLVWVHASPEHVVVTR.[N]      | N-Term(iTRAQ4plex)            | 1 | 1 |
| [K].nPLVWVHASPEHVVVTR.[N]      | N-Term(iTRAQ4plex)            | 1 | 1 |
| [K].sPEQQETVLDGNLIIR.[Y]       | N-Term(iTRAQ4plex)            | 1 | 1 |
| [K].sPEQQETVLDGNLIIR.[Y]       | N-Term(iTRAQ4plex)            | 1 | 1 |
| [K].sPEQQETVLDGNLIIR.[Y]       | N-Term(iTRAQ4plex)            | 1 | 1 |
| [R].gPDVLTATVSGk.[L]           | N-Term(iTRAQ4plex); K12(iTRAQ | 1 | 1 |
| [R].gPDVLTATVSGk.[L]           | N-Term(iTRAQ4plex); K12(iTRAQ | 1 | 1 |
| [R].gPDVLTATVSGk.[L]           | N-Term(iTRAQ4plex); K12(iTRAQ | 1 | 1 |
| [K].yIFHNFMER.[L]              | N-Term(iTRAQ4plex)            | 1 | 1 |
| [K].yIFHNFMER.[L]              | N-Term(iTRAQ4plex)            | 1 | 1 |
| [K].yIFHNFMER.[L]              | N-Term(iTRAQ4plex)            | 1 | 1 |
| [R].QGPNLLSDPEQGVEVTGQYER.[E]  |                               | 1 | 1 |
| [R].fkPTLSQQQk.[S]             | N-Term(iTRAQ4plex); K10(iTRAQ | 1 | 1 |
| [R].FkPTLSQQQk.[S]             | K2(iTRAQ4plex); K10(iTRAQ4ple | 1 | 1 |
| [R].FkPTLSQQQk.[S]             | K2(iTRAQ4plex); K10(iTRAQ4ple | 1 | 1 |
| [R].fkPTLSQQQk.[S]             | N-Term(iTRAQ4plex); K10(iTRAQ | 1 | 1 |
| [R].nVHSGSTFFk.[Y]             | N-Term(iTRAQ4plex); K10(iTRAQ | 1 | 1 |
| [R].nVHSGSTFFk.[Y]             | N-Term(iTRAQ4plex); K10(iTRAQ | 1 | 1 |
| [K].vRPQQLVk.[H]               | N-Term(iTRAQ4plex); K8(iTRAQ4 | 1 | 1 |
| [R].qLGLPGPPDVPDHAAYHPFR.[R]   | N-Term(iTRAQ4plex)            | 1 | 1 |
| [R].qLGLPGPPDVPDHAAYHPFR.[R]   | N-Term(iTRAQ4plex)            | 1 | 1 |
| [R].qLGLPGPPDVPDHAAYHPFR.[R]   | N-Term(iTRAQ4plex)            | 1 | 1 |
| [R].qLGLPGPPDVPDHAAYHPFR.[R]   | N-Term(iTRAQ4plex)            | 1 | 1 |
| [R].qLGLPGPPDVPDHAAYHPFR.[R]   | N-Term(iTRAQ4plex)            | 1 | 1 |
| [R].qLGLPGPPDVPDHAAYHPFR.[R]   | N-Term(iTRAQ4plex)            | 1 | 1 |
| [R].qLGLPGPPDVPDHAAYHPFR.[R]   | N-Term(iTRAQ4plex)            | 1 | 1 |
| [R].QLGLPGPPDVPDHAAYHPFR.[R]   |                               | 1 | 1 |
| [R].nMEQFQVSVSAPNAk.[I]        | N-Term(iTRAQ4plex); K16(iTRAQ | 1 | 1 |
| [K].nVVFVIDk.[S]               | N-Term(iTRAQ4plex); K8(iTRAQ4 | 1 | 1 |
| [K].tGLLLSDPdk.[V]             | N-Term(iTRAQ4plex); K11(iTRAQ | 1 | 1 |

|                                     |                                          |   |   |
|-------------------------------------|------------------------------------------|---|---|
| [K].iTFELVYEELLk.[R]                | N-Term(iTRAQ4plex); K12(iTRAQ4plex)      | 1 | 1 |
| [R].nMEQFQVSVSVAPNAk.[I]            | N-Term(iTRAQ4plex); K16(iTRAQ4plex)      | 1 | 1 |
| [R].nMEQFQVSVSVAPNAk.[I]            | N-Term(iTRAQ4plex); K16(iTRAQ4plex)      | 1 | 1 |
| [K].tGLLLLSDPdk.[V]                 | N-Term(iTRAQ4plex); K11(iTRAQ4plex)      | 1 | 1 |
| [K].aEAQAQYSAAVak.[G]               | N-Term(iTRAQ4plex); K13(iTRAQ4plex)      | 1 | 1 |
| [R].rLDYQEGPPGVEIScWSVEL.[-]        | N-Term(iTRAQ4plex); C15(Carbamidomethyl) | 1 | 1 |
| [R].rLDYQEGPPGVEIScWSVEL.[-]        | N-Term(iTRAQ4plex); C15(Carbamidomethyl) | 1 | 1 |
| [R].LGVYELLk.[V]                    | K9(iTRAQ4plex)                           | 1 | 1 |
| [R].dQFNLIIVFSTEATQWRPSLVPASAENVnk. | N-Term(iTRAQ4plex); K29(iTRAQ4plex)      | 1 | 1 |
| [R].dQFNLIIVFSTEATQWRPSLVPASAENVnk. | N-Term(iTRAQ4plex); K29(iTRAQ4plex)      | 1 | 1 |
| [K].aGFSWIEVTFk.[N]                 | N-Term(iTRAQ4plex); K11(iTRAQ4plex)      | 1 | 1 |
| [K].aEAQAQYSAAVak.[G]               | N-Term(iTRAQ4plex); K13(iTRAQ4plex)      | 1 | 1 |
| [K].aGFSWIEVTFk.[N]                 | N-Term(iTRAQ4plex); K11(iTRAQ4plex)      | 1 | 1 |
| [K].aGFSWIEVTFk.[N]                 | N-Term(iTRAQ4plex); K11(iTRAQ4plex)      | 1 | 1 |
| [K].aGFSWIEVTFk.[N]                 | N-Term(iTRAQ4plex); K11(iTRAQ4plex)      | 1 | 1 |
| [K].aEAQAQYSAAVak.[G]               | N-Term(iTRAQ4plex); K13(iTRAQ4plex)      | 1 | 1 |
| [K].ekAEAQAQYSAAVak.[G]             | N-Term(iTRAQ4plex); K2(iTRAQ4plex)       | 1 | 1 |
| [K].ekAEAQAQYSAAVak.[G]             | N-Term(iTRAQ4plex); K2(iTRAQ4plex)       | 1 | 1 |
| [K].wkETLFSVMPGLk.[M]               | N-Term(iTRAQ4plex); K2(iTRAQ4plex)       | 1 | 1 |
| [K].aEAQAQYSAAVak.[G]               | N-Term(iTRAQ4plex); K13(iTRAQ4plex)      | 1 | 1 |
| [K].aEAQAQYSAAVak.[G]               | N-Term(iTRAQ4plex); K13(iTRAQ4plex)      | 1 | 1 |
| [K].aEAQAQYSAAVak.[G]               | N-Term(iTRAQ4plex); K13(iTRAQ4plex)      | 1 | 1 |
| [K].ekAEAQAQYSAAVak.[G]             | N-Term(iTRAQ4plex); K2(iTRAQ4plex)       | 1 | 1 |
| [K].ekAEAQAQYSAAVak.[G]             | N-Term(iTRAQ4plex); K2(iTRAQ4plex)       | 1 | 1 |
| [K].aEAQAQYSAAVak.[G]               | N-Term(iTRAQ4plex); K13(iTRAQ4plex)      | 1 | 1 |
| [K].aEAQAQYSAAVak.[G]               | N-Term(iTRAQ4plex); K13(iTRAQ4plex)      | 1 | 1 |
| [K].aGFSWIEVTFk.[N]                 | N-Term(iTRAQ4plex); K11(iTRAQ4plex)      | 1 | 1 |
| [R].lGVYELLk.[V]                    | N-Term(iTRAQ4plex); K9(iTRAQ4plex)       | 1 | 1 |
| [K].gSEMvVAGk.[L]                   | N-Term(iTRAQ4plex); K9(iTRAQ4plex)       | 1 | 1 |
| [K].gSEMvVAGk.[L]                   | N-Term(iTRAQ4plex); K9(iTRAQ4plex)       | 1 | 1 |
| [R].fSSHVGgTLGQFYQEVlWGSPAASDDGR.   | N-Term(iTRAQ4plex)                       | 1 | 1 |
| [R].fSSHVGgTLGQFYQEVlWGSPAASDDGR.   | N-Term(iTRAQ4plex)                       | 1 | 1 |
| [K].eTLFSVMPGLk.[M]                 | N-Term(iTRAQ4plex); K11(iTRAQ4plex)      | 1 | 1 |
| [K].eTLFSVMPGLk.[M]                 | N-Term(iTRAQ4plex); K11(iTRAQ4plex)      | 1 | 1 |
| [K].aEAQAQYSAAVak.[G]               | N-Term(iTRAQ4plex); K13(iTRAQ4plex)      | 1 | 1 |
| [K].aEAQAQYSAAVak.[G]               | N-Term(iTRAQ4plex); K13(iTRAQ4plex)      | 1 | 1 |
| [R].fSSHVGgTLGQFYQEVlWGSPAASDDGR.   | N-Term(iTRAQ4plex)                       | 1 | 1 |
| [K].tGLLLLSDPdkVTIGLLFWdGR.[G]      | N-Term(iTRAQ4plex); K11(iTRAQ4plex)      | 1 | 1 |
| [R].IPEGSVSLIILLTDGDPTVGETNPR.[S]   | N-Term(iTRAQ4plex)                       | 1 | 1 |
| [R].IPEGSVSLIILLTDGDPTVGETNPR.[S]   | N-Term(iTRAQ4plex)                       | 1 | 1 |
| [K].aEAQAQYSAAVak.[G]               | N-Term(iTRAQ4plex); K13(iTRAQ4plex)      | 1 | 1 |
| [R].IWAYLTIQQLLEQTVSASDADQQALR.[N]  | N-Term(iTRAQ4plex)                       | 1 | 1 |
| [R].vQGNDHSATR.[E]                  | N-Term(iTRAQ4plex)                       | 1 | 1 |
| [R].IWAYLTIQQLLEQTVSASDADQQALR.[N]  | N-Term(iTRAQ4plex)                       | 1 | 1 |
| [R].fSSHVGgTLGQFYQEVlWGSPAASDDGR.   | N-Term(iTRAQ4plex)                       | 1 | 1 |
| [K].nVVFVIDk.[S]                    | N-Term(iTRAQ4plex); K8(iTRAQ4plex)       | 1 | 1 |
| [K].yIFHNFMER.[L]                   | N-Term(iTRAQ4plex)                       | 1 | 1 |
| [R].nVHSGSTFFk.[Y]                  | N-Term(iTRAQ4plex); K10(iTRAQ4plex)      | 1 | 1 |
| [K].vRPQQLVk.[H]                    | N-Term(iTRAQ4plex); K8(iTRAQ4plex)       | 1 | 1 |
| [R].fkPTLSQQQk.[S]                  | N-Term(iTRAQ4plex); K10(iTRAQ4plex)      | 1 | 1 |
| [R].nVHSGSTFFk.[Y]                  | N-Term(iTRAQ4plex); K10(iTRAQ4plex)      | 1 | 1 |
| [K].aGFSWIEVTFk.[N]                 | N-Term(iTRAQ4plex); K11(iTRAQ4plex)      | 1 | 1 |

|                                  |                                     |   |   |
|----------------------------------|-------------------------------------|---|---|
| [K].nPLVWVHASPEHVVVTR.[N]        | N-Term(iTRAQ4plex)                  | 1 | 1 |
| [R].MNFRPGVLSSR.[Q]              |                                     | 1 | 1 |
| [K].NVVFVIDk.[S]                 | K8(iTRAQ4plex)                      | 1 | 1 |
| [K].tGLLLLSDPDk.[V]              | N-Term(iTRAQ4plex); K11(iTRAQ4plex) | 1 | 1 |
| [K].iLDDLSPR.[D]                 | N-Term(iTRAQ4plex)                  | 1 | 1 |
| [R].fkPTLSQQQk.[S]               | K2(iTRAQ4plex); K10(iTRAQ4plex)     | 1 | 1 |
| [K].eTLFSVMPGLk.[M]              | N-Term(iTRAQ4plex); K11(iTRAQ4plex) | 1 | 1 |
| [R].mNFRPGVLSSR.[Q]              | N-Term(iTRAQ4plex)                  | 1 | 1 |
| [R].fkPTLSQQQk.[S]               | N-Term(iTRAQ4plex); K2(iTRAQ4plex)  | 1 | 1 |
| [K].gSEMVVAGk.[L]                | N-Term(iTRAQ4plex); K9(iTRAQ4plex)  | 1 | 1 |
| [K].iTfELVYEELLk.[R]             | N-Term(iTRAQ4plex); K12(iTRAQ4plex) | 1 | 1 |
| [K].gSEmVVAGk.[L]                | N-Term(iTRAQ4plex); M4(Oxidation)   | 1 | 1 |
| [K].NPLVWVHASPEHVVVTR.[N]        |                                     | 1 | 1 |
| [K].yIFHNFMER.[L]                | N-Term(iTRAQ4plex)                  | 1 | 1 |
| [K].eTLFSVmPGLk.[M]              | N-Term(iTRAQ4plex); M7(Oxidation)   | 1 | 1 |
| [R].mNFRPGVLSSR.[Q]              | N-Term(iTRAQ4plex); M1(Oxidation)   | 1 | 1 |
| [K].TGLLLLSDPDk.[V]              | K11(iTRAQ4plex)                     | 1 | 1 |
| [R].FAHTVVTSR.[V]                |                                     | 1 | 1 |
| [K].iPkPEASFSPR.[R]              | K3(iTRAQ4plex)                      | 1 | 1 |
| [R].gPDVLTATVSGk.[L]             | N-Term(iTRAQ4plex); K12(iTRAQ4plex) | 1 | 1 |
| [K].eTLFSVMPGLk.[M]              | N-Term(iTRAQ4plex); K11(iTRAQ4plex) | 1 | 1 |
| [K].NVVFVIDk.[S]                 | K8(iTRAQ4plex)                      | 1 | 1 |
| [R].fkPTLSQQQk.[S]               | N-Term(iTRAQ4plex); K2(iTRAQ4plex)  | 1 | 1 |
| [R].fkPTLSQQQk.[S]               | N-Term(iTRAQ4plex); K10(iTRAQ4plex) | 1 | 1 |
| [K].TGLLLLSDPDk.[V]              | K11(iTRAQ4plex)                     | 1 | 1 |
| [K].sPEQQETVLDGNLIIR.[Y]         | N-Term(iTRAQ4plex)                  | 1 | 1 |
| [K].gkSAGLVk.[A]                 | N-Term(iTRAQ4plex); K2(iTRAQ4plex)  | 1 | 1 |
| [K].aEAQAQYSAAVAk.[G]            | N-Term(iTRAQ4plex); K13(iTRAQ4plex) | 1 | 1 |
| [R].mNFRPGVLSSR.[Q]              | N-Term(iTRAQ4plex)                  | 1 | 1 |
| [K].AEQAQYSAAVAk.[G]             | K13(iTRAQ4plex)                     | 1 | 1 |
| [K].gSEmVVAGk.[L]                | N-Term(iTRAQ4plex); M4(Oxidation)   | 1 | 1 |
| [R].qLGLPGPPDVPDHAAYHPFR.[R]     | N-Term(iTRAQ4plex)                  | 1 | 1 |
| [K].sAGLVkATGR.[N]               | N-Term(iTRAQ4plex); K6(iTRAQ4plex)  | 1 | 1 |
| [K].NPLVWVHASPEHVVVTR.[N]        |                                     | 1 | 1 |
| [R].FAHTVVTSR.[V]                |                                     | 1 | 1 |
| [K].tGLLLLSDPDk.[V]              | N-Term(iTRAQ4plex); K11(iTRAQ4plex) | 1 | 1 |
| [R].IGVYELLLk.[V]                | N-Term(iTRAQ4plex); K9(iTRAQ4plex)  | 1 | 1 |
| [K].vRPQQLVk.[H]                 | N-Term(iTRAQ4plex); K8(iTRAQ4plex)  | 1 | 1 |
| [K].iLDDLSPR.[D]                 | N-Term(iTRAQ4plex)                  | 1 | 1 |
| [K].nVVVFVIDk.[S]                | N-Term(iTRAQ4plex); K8(iTRAQ4plex)  | 1 | 1 |
| [R].qGPVNLLSDPEQGVEVTGQYER.[E]   | N-Term(iTRAQ4plex)                  | 1 | 1 |
| [R].mNFRPGVLSSR.[Q]              | N-Term(iTRAQ4plex)                  | 1 | 1 |
| [R].FAHTVVTSR.[V]                |                                     | 1 | 1 |
| [K].eTLFSVMPGLk.[M]              | N-Term(iTRAQ4plex); K11(iTRAQ4plex) | 1 | 1 |
| [K].iPkPEASFSPR.[R]              | N-Term(iTRAQ4plex); K3(iTRAQ4plex)  | 1 | 1 |
| [K].yIFHNFmER.[L]                | N-Term(iTRAQ4plex); M7(Oxidation)   | 1 | 1 |
| [R].faHTVVTSR.[V]                | N-Term(iTRAQ4plex)                  | 1 | 1 |
| [K].iPkPEASFSPR.[R]              | N-Term(iTRAQ4plex); K3(iTRAQ4plex)  | 1 | 1 |
| [K].iLDDLSPR.[D]                 |                                     | 1 | 1 |
| [K].aEAQAQYSAAVAk.[G]            | N-Term(iTRAQ4plex); K13(iTRAQ4plex) | 1 | 1 |
| [R].fkPTLSQQQk.[S]               | N-Term(iTRAQ4plex); K2(iTRAQ4plex)  | 1 | 1 |
| [R].fSSHVGGLGQFYQEVLWGSPAASDDGR. | N-Term(iTRAQ4plex)                  | 1 | 1 |

|                              |                                |   |   |
|------------------------------|--------------------------------|---|---|
| [K].eTLFSVmPGLk.[M]          | N-Term(iTRAQ4plex); M7(Oxidati | 1 | 1 |
| [R].faHTVVTSR.[V]            | N-Term(iTRAQ4plex)             | 1 | 1 |
| [R].qLGLPGPPDVPDHAAYHPFR.[R] | N-Term(iTRAQ4plex)             | 1 | 1 |
| [K].aGFSWIEVTFk.[N]          | N-Term(iTRAQ4plex); K11(iTRAQ  | 1 | 1 |
| [R].faHTVVTSR.[V]            | N-Term(iTRAQ4plex)             | 1 | 1 |
| [K].iLDDLSPR.[D]             | N-Term(iTRAQ4plex)             | 1 | 1 |
| [K].aEAQAQYSAAVak.[G]        | N-Term(iTRAQ4plex); K13(iTRAQ  | 1 | 1 |
| [K].nPLVWVHASPEHVVVTR.[N]    | N-Term(iTRAQ4plex)             | 1 | 1 |
| [R].nmEQFQVSVSVAPNAk.[I]     | N-Term(iTRAQ4plex); M2(Oxidati | 1 | 1 |
| [K].yYLGAK.[I]               | N-Term(iTRAQ4plex); K7(iTRAQ4  | 1 | 1 |
| [K].YIFHNFMER.[L]            |                                | 1 | 1 |
| [K].yIFHNFMER.[L]            | N-Term(iTRAQ4plex)             | 1 | 1 |
| [K].yYLGAK.[I]               | N-Term(iTRAQ4plex); K7(iTRAQ4  | 1 | 1 |
| [R].MNFRPGVLSSR.[Q]          |                                | 1 | 1 |
| [K].TGLLLSDPdk.[V]           | K11(iTRAQ4plex)                | 1 | 1 |
| [R].IGVYELLLk.[V]            | N-Term(iTRAQ4plex); K9(iTRAQ4  | 1 | 1 |
| [R].rLGVYELLLk.[V]           | N-Term(iTRAQ4plex); K10(iTRAQ  | 1 | 1 |
| [R].fkPTLSQQQk.[S]           | N-Term(iTRAQ4plex); K2(iTRAQ4  | 1 | 1 |
| [K].eTLFSVMPGLk.[M]          | N-Term(iTRAQ4plex); K11(iTRAQ  | 1 | 1 |
| [K].iLDDLSPR.[D]             |                                | 1 | 1 |
| [R].fkPTLSQQQk.[S]           | N-Term(iTRAQ4plex); K2(iTRAQ4  | 1 | 1 |
| [K].iLDDLSPR.[D]             | N-Term(iTRAQ4plex)             | 1 | 1 |
| [R].nMEQFQVSVSVAPNAk.[I]     | N-Term(iTRAQ4plex); K16(iTRAQ  | 1 | 1 |
| [R].fkPTLSQQQk.[S]           | N-Term(iTRAQ4plex); K2(iTRAQ4  | 1 | 1 |
| [K].VRPQQLVk.[H]             | K8(iTRAQ4plex)                 | 1 | 1 |
| [R].mNFRPGVLSSR.[Q]          | N-Term(iTRAQ4plex)             | 1 | 1 |
| [R].mNFRPGVLSSR.[Q]          | N-Term(iTRAQ4plex); M1(Oxidati | 1 | 1 |
| [K].yIFHNFmER.[L]            | N-Term(iTRAQ4plex); M7(Oxidati | 1 | 1 |
| [R].fkPTLSQQQk.[S]           | N-Term(iTRAQ4plex); K2(iTRAQ4  | 1 | 1 |
| [R].faHTVVTSR.[V]            | N-Term(iTRAQ4plex)             | 1 | 1 |
| [R].gPDVLTATVSGk.[L]         | N-Term(iTRAQ4plex); K12(iTRAQ  | 1 | 1 |
| [R].FAHTVVTSR.[V]            |                                | 1 | 1 |
| [K].yIFHNFmER.[L]            | N-Term(iTRAQ4plex); M7(Oxidati | 1 | 1 |
| [K].vRPQQLVk.[H]             | N-Term(iTRAQ4plex); K8(iTRAQ4  | 1 | 1 |
| [K].vRPQQLVk.[H]             | N-Term(iTRAQ4plex); K8(iTRAQ4  | 1 | 1 |
| [R].faHTVVTSR.[V]            | N-Term(iTRAQ4plex)             | 1 | 1 |
| [K].aEAQAQYSAAVak.[G]        | N-Term(iTRAQ4plex); K13(iTRAQ  | 1 | 1 |
| [K].yIFHNFmER.[L]            | N-Term(iTRAQ4plex); M7(Oxidati | 1 | 1 |
| [R].mNFRPGVLSSR.[Q]          | N-Term(iTRAQ4plex); M1(Oxidati | 1 | 1 |
| [K].aGFSWIEVTFk.[N]          | N-Term(iTRAQ4plex); K11(iTRAQ  | 1 | 1 |
| [R].mNFRPGVLSSR.[Q]          | N-Term(iTRAQ4plex); M1(Oxidati | 1 | 1 |
| [R].fkPTLSQQQk.[S]           | N-Term(iTRAQ4plex); K2(iTRAQ4  | 1 | 1 |
| [R].faHTVVTSR.[V]            | N-Term(iTRAQ4plex)             | 1 | 1 |
| [K].YIFHNFMER.[L]            |                                | 1 | 1 |
| [R].FAHTVVTSR.[V]            |                                | 1 | 1 |
| [K].SPEQqETVLDGNLIIR.[Y]     | N-Term(iTRAQ4plex)             | 1 | 1 |
| [K].AEAQAQYSAAVak.[G]        | K13(iTRAQ4plex)                | 1 | 1 |
| [K].nVVFVIDk.[S]             | N-Term(iTRAQ4plex); K8(iTRAQ4  | 1 | 1 |
| [K].iLDDLSPR.[D]             | N-Term(iTRAQ4plex)             | 1 | 1 |
| [R].eiMENYNIAlR.[W]          | N-Term(iTRAQ4plex)             | 2 | 2 |
| [R].eiMENYNIAlR.[W]          | N-Term(iTRAQ4plex)             | 2 | 2 |
| [K].sSNLIIEHLk.[N]           | N-Term(iTRAQ4plex); K12(iTRAQ  | 1 | 1 |

|                                 |                                |   |   |
|---------------------------------|--------------------------------|---|---|
| [K].sSNLIILEEHLk.[N]            | N-Term(iTRAQ4plex); K12(iTRAQ  | 1 | 1 |
| [K].sSNLIILEEHLk.[N]            | N-Term(iTRAQ4plex); K12(iTRAQ  | 1 | 1 |
| [K].sSNLIILEEHLk.[N]            | N-Term(iTRAQ4plex); K12(iTRAQ  | 1 | 1 |
| [K].sSNLIILEEHLk.[N]            | N-Term(iTRAQ4plex); K12(iTRAQ  | 1 | 1 |
| [K].wSSPPQcEGLPck.[S]           | N-Term(iTRAQ4plex); C7(Carbam  | 1 | 1 |
| [K].wSHPPScIk.[T]               | N-Term(iTRAQ4plex); C7(Carbam  | 1 | 1 |
| [K].wSHPPScIk.[T]               | N-Term(iTRAQ4plex); C7(Carbam  | 1 | 1 |
| [K].wSHPPScIk.[T]               | N-Term(iTRAQ4plex); C7(Carbam  | 1 | 1 |
| [K].wSHPPScIk.[T]               | N-Term(iTRAQ4plex); C7(Carbam  | 1 | 1 |
| [R].nTEILTGSWSDQTYPEGTQAIYk.[C] | N-Term(iTRAQ4plex); K23(iTRAQ  | 1 | 1 |
| [R].nTEILTGSWSDQTYPEGTQAIYk.[C] | N-Term(iTRAQ4plex); K23(iTRAQ  | 1 | 1 |
| [R].nTEILTGSWSDQTYPEGTQAIYk.[C] | N-Term(iTRAQ4plex); K23(iTRAQ  | 1 | 1 |
| [R].ecDTDGWTNDIPicEVVk.[C]      | N-Term(iTRAQ4plex); C2(Carbam  | 1 | 1 |
| [R].ecDTDGWTNDIPicEVVk.[C]      | N-Term(iTRAQ4plex); C2(Carbam  | 1 | 1 |
| [K].cTSTGWIPAPR.[C]             | C1(Carbamidomethyl)            | 1 | 1 |
| [K].iDVHLVPDR.[K]               | N-Term(iTRAQ4plex)             | 1 | 1 |
| [K].iDVHLVPDR.[K]               | N-Term(iTRAQ4plex)             | 1 | 1 |
| [K].sIDVAcHPGYALPk.[A]          | N-Term(iTRAQ4plex); C6(Carbam  | 1 | 1 |
| [K].sIDVAcHPGYALPk.[A]          | N-Term(iTRAQ4plex); C6(Carbam  | 1 | 1 |
| [K].sIDVAcHPGYALPk.[A]          | N-Term(iTRAQ4plex); C6(Carbam  | 1 | 1 |
| [K].vSVLcQENYLIQEGEEITck.[D]    | N-Term(iTRAQ4plex); C5(Carbam  | 1 | 1 |
| [K].vSVLcQENYLIQEGEEITck.[D]    | N-Term(iTRAQ4plex); C5(Carbam  | 1 | 1 |
| [K].vSVLcQENYLIQEGEEITck.[D]    | N-Term(iTRAQ4plex); C5(Carbam  | 1 | 1 |
| [K].vSVLcQENYLIQEGEEITck.[D]    | N-Term(iTRAQ4plex); C5(Carbam  | 1 | 1 |
| [R].kGEWVALNPLR.[K]             | N-Term(iTRAQ4plex); K1(iTRAQ4  | 1 | 1 |
| [R].kGEWVALNPLR.[K]             | N-Term(iTRAQ4plex); K1(iTRAQ4  | 1 | 1 |
| [R].kGEWVALNPLR.[K]             | N-Term(iTRAQ4plex); K1(iTRAQ4  | 1 | 1 |
| [R].rPYFPVAVGk.[Y]              | N-Term(iTRAQ4plex); K10(iTRAQ  | 2 | 2 |
| [R].rPYFPVAVGk.[Y]              | N-Term(iTRAQ4plex); K10(iTRAQ  | 2 | 2 |
| [R].rPYFPVAVGk.[Y]              | N-Term(iTRAQ4plex); K10(iTRAQ  | 2 | 2 |
| [R].rPYFPVAVGk.[Y]              | N-Term(iTRAQ4plex); K10(iTRAQ  | 2 | 2 |
| [K].wSHPPScIk.[T]               | N-Term(iTRAQ4plex); C7(Carbam  | 1 | 1 |
| [R].wQSIPLcVEk.[I]              | N-Term(iTRAQ4plex); C7(Carbam  | 1 | 1 |
| [R].wQSIPLcVEk.[I]              | N-Term(iTRAQ4plex); C7(Carbam  | 1 | 1 |
| [R].wQSIPLcVEk.[I]              | N-Term(iTRAQ4plex); C7(Carbam  | 1 | 1 |
| [K].scDIPVFMNAR.[T]             | N-Term(iTRAQ4plex); C2(Carbam  | 1 | 1 |
| [K].cTSTGWIPAPR.[C]             | N-Term(iTRAQ4plex); C1(Carbam  | 1 | 1 |
| [K].cTSTGWIPAPR.[C]             | N-Term(iTRAQ4plex); C1(Carbam  | 1 | 1 |
| [K].tDcLSLPSFENAIPMGek.[K]      | N-Term(iTRAQ4plex); C3(Carbam  | 1 | 1 |
| [K].aVYTcNEGYQLLGEINYR.[E]      | N-Term(iTRAQ4plex); C5(Carbam  | 1 | 1 |
| [K].iEGDEEMHcSDDGFWSk.[E]       | N-Term(iTRAQ4plex); C9(Carbam  | 1 | 1 |
| [K].eEYGHSEVVEYYcNPR.[F]        | N-Term(iTRAQ4plex); C13(Carbar | 1 | 1 |
| [R].gDAVcTESGWRPLPScEEk.[S]     | N-Term(iTRAQ4plex); C5(Carbam  | 1 | 1 |
| [R].gDAVcTESGWRPLPScEEk.[S]     | N-Term(iTRAQ4plex); C5(Carbam  | 1 | 1 |
| [R].sITcIHGVWTQLPQcVAIDk.[L]    | N-Term(iTRAQ4plex); C4(Carbam  | 1 | 1 |
| [K].tkEEYGHSEVVEYYcNPR.[F]      | N-Term(iTRAQ4plex); K2(iTRAQ4  | 1 | 1 |
| [K].hGGLYHENMR.[R]              | N-Term(iTRAQ4plex)             | 1 | 1 |
| [R].tGESVEFVck.[R]              | N-Term(iTRAQ4plex); C9(Carbam  | 1 | 1 |
| [R].tGESVEFVck.[R]              | N-Term(iTRAQ4plex); C9(Carbam  | 1 | 1 |
| [K].tkEEYGHSEVVEYYcNPR.[F]      | N-Term(iTRAQ4plex); K2(iTRAQ4  | 1 | 1 |
| [K].dGWSAQPTcIk.[S]             | N-Term(iTRAQ4plex); C9(Carbam  | 1 | 1 |
| [K].dGWSAQPTcIk.[S]             | N-Term(iTRAQ4plex); C9(Carbam  | 1 | 1 |

|                                 |                                |   |   |
|---------------------------------|--------------------------------|---|---|
| [K].aGEQVYTYcATYYk.[M]          | N-Term(iTRAQ4plex); C9(Carbam  | 1 | 1 |
| [R].TGDEITYQcR.[N]              | C9(Carbamidomethyl)            | 1 | 1 |
| [R].TGDEITYQcR.[N]              | C9(Carbamidomethyl)            | 1 | 1 |
| [R].tGDEITYQcR.[N]              | N-Term(iTRAQ4plex); C9(Carbam  | 1 | 1 |
| [R].tGDEITYQcR.[N]              | N-Term(iTRAQ4plex); C9(Carbam  | 1 | 1 |
| [R].sSQESYAHGtK.[L]             | N-Term(iTRAQ4plex); K11(iTRAQ  | 1 | 1 |
| [R].sSQESYAHGtK.[L]             | N-Term(iTRAQ4plex); K11(iTRAQ  | 1 | 1 |
| [K].lGYVTADGETSGSITcGk.[D]      | N-Term(iTRAQ4plex); C16(Carbar | 1 | 1 |
| [R].gDAVcTESGWRPLPScEEk.[S]     | N-Term(iTRAQ4plex); C5(Carbam  | 1 | 1 |
| [R].sSQESYAHGtK.[L]             | N-Term(iTRAQ4plex); K11(iTRAQ  | 1 | 1 |
| [R].dTScVNPPTVQNAYIVSR.[Q]      | N-Term(iTRAQ4plex); C4(Carbam  | 1 | 1 |
| [R].sSQESYAHGtK.[L]             | N-Term(iTRAQ4plex); K11(iTRAQ  | 1 | 1 |
| [K].vSVLcQENYLIQEGEEITck.[D]    | N-Term(iTRAQ4plex); C5(Carbam  | 1 | 1 |
| [R].TGESVEFVck.[R]              | C9(Carbamidomethyl); K10(iTRA  | 1 | 1 |
| [K].nDFTWfk.[L]                 | N-Term(iTRAQ4plex); K7(iTRAQ4  | 1 | 1 |
| [R].sSQESYAHGtK.[L]             | N-Term(iTRAQ4plex); K11(iTRAQ  | 1 | 1 |
| [R].cTLkPcDYDPDIk.[H]           | N-Term(iTRAQ4plex); C1(Carbam  | 1 | 1 |
| [K].lSYTcEGGFR.[I]              | N-Term(iTRAQ4plex); C5(Carbam  | 1 | 1 |
| [R].sLGNVImVcR.[K]              | N-Term(iTRAQ4plex); M7(Oxidati | 1 | 1 |
| [R].tGDEITYQcR.[N]              | N-Term(iTRAQ4plex); C9(Carbam  | 1 | 1 |
| [R].EIMENYNIALR.[W]             |                                | 2 | 2 |
| [K].lVSSAMEPDR.[E]              |                                | 1 | 1 |
| [K].lGYVTADGETSGSITcGk.[D]      | N-Term(iTRAQ4plex); C16(Carbar | 1 | 1 |
| [K].wSHPPScIk.[T]               | N-Term(iTRAQ4plex); C7(Carbam  | 1 | 1 |
| [R].sSQESYAHGtK.[L]             | N-Term(iTRAQ4plex); K11(iTRAQ  | 1 | 1 |
| [K].vSVLcQENYLIQEGEEITck.[D]    | N-Term(iTRAQ4plex); C5(Carbam  | 1 | 1 |
| [R].fVcNSGYk.[I]                | N-Term(iTRAQ4plex); C3(Carbam  | 1 | 1 |
| [K].wSHPPScIk.[T]               | N-Term(iTRAQ4plex); C7(Carbam  | 1 | 1 |
| [K].lVSSAMEPDR.[E]              | N-Term(iTRAQ4plex)             | 1 | 1 |
| [K].nDFTWfk.[L]                 | N-Term(iTRAQ4plex); K7(iTRAQ4  | 1 | 1 |
| [R].cTLkPcDYDPDIk.[H]           | N-Term(iTRAQ4plex); C1(Carbam  | 1 | 1 |
| [K].aGEQVYTYcATYYk.[M]          | N-Term(iTRAQ4plex); C9(Carbam  | 1 | 1 |
| [K].lSYTcEGGFR.[I]              | C5(Carbamidomethyl)            | 1 | 1 |
| [K].eFDHNSNIR.[Y]               | N-Term(iTRAQ4plex)             | 1 | 1 |
| [K].lDVHLVPDR.[K]               | N-Term(iTRAQ4plex)             | 1 | 1 |
| [R].sLGNVIMVcR.[K]              | N-Term(iTRAQ4plex); C9(Carbam  | 1 | 1 |
| [R].kGEWVALNPLR.[K]             | N-Term(iTRAQ4plex)             | 1 | 1 |
| [R].kGEWVALNPLR.[K]             | K1(iTRAQ4plex)                 | 1 | 1 |
| [K].scDIPVFMNAR.[T]             | N-Term(iTRAQ4plex); C2(Carbam  | 1 | 1 |
| [K].lSYTcEGGFR.[I]              | N-Term(iTRAQ4plex); C5(Carbam  | 1 | 1 |
| [R].fVcNSGYk.[I]                | N-Term(iTRAQ4plex); C3(Carbam  | 1 | 1 |
| [K].eEYGHSEVVEYYcNPR.[F]        | N-Term(iTRAQ4plex); C13(Carbar | 1 | 1 |
| [R].sLGNVIMVcR.[K]              | N-Term(iTRAQ4plex); C9(Carbam  | 1 | 1 |
| [R].gDAVcTESGWRPLPScEEk.[S]     | N-Term(iTRAQ4plex); C5(Carbam  | 1 | 1 |
| [R].nTEILTGSWSDQTYPEGTQAIYk.[C] | N-Term(iTRAQ4plex); K23(iTRAQ  | 1 | 1 |
| [R].tGESVEFVck.[R]              | N-Term(iTRAQ4plex); C9(Carbam  | 1 | 1 |
| [K].hGGLYHENmR.[R]              | N-Term(iTRAQ4plex); M9(Oxidati | 1 | 1 |
| [K].eFDHNSNIR.[Y]               | N-Term(iTRAQ4plex)             | 1 | 1 |
| [R].elmENYNIALR.[W]             | N-Term(iTRAQ4plex); M3(Oxidati | 2 | 2 |
| [K].cLHPcVISR.[E]               | N-Term(iTRAQ4plex); C1(Carbam  | 2 | 2 |
| [K].vSVLcQENYLIQEGEEITck.[D]    | N-Term(iTRAQ4plex); C5(Carbam  | 1 | 1 |
| [R].nTEILTGSWSDQTYPEGTQAIYk.[C] | N-Term(iTRAQ4plex); K23(iTRAQ  | 1 | 1 |

|                               |                                |   |   |
|-------------------------------|--------------------------------|---|---|
| [R].FVcNSGYk.[I]              | C3(Carbamidomethyl); K8(iTRAC  | 1 | 1 |
| [K].iVSSAMEPDREYHFGQAVR.[F]   | N-Term(iTRAQ4plex)             | 1 | 1 |
| [K].cVEISck.[S]               | N-Term(iTRAQ4plex); C1(Carbam  | 1 | 1 |
| [R].SITcIHGVWVTQLPQcVAIDk.[L] | C4(Carbamidomethyl); C15(Carb  | 1 | 1 |
| [R].SSQESYAHGtK.[L]           | K11(iTRAQ4plex)                | 1 | 1 |
| [R].sITcIHGVWVTQLPQcVAIDk.[L] | N-Term(iTRAQ4plex); C4(Carbam  | 1 | 1 |
| [R].kGEWVALNPLR.[K]           | N-Term(iTRAQ4plex); K1(iTRAQ4  | 1 | 1 |
| [R].wTGRPTcR.[D]              | N-Term(iTRAQ4plex); C7(Carbam  | 1 | 1 |
| [R].wTGRPTcR.[D]              | N-Term(iTRAQ4plex); C7(Carbam  | 1 | 1 |
| [R].TGDEITYQcR.[N]            | C9(Carbamidomethyl)            | 1 | 1 |
| [K].wSSPPQcEGLPck.[S]         | N-Term(iTRAQ4plex); C7(Carbam  | 1 | 1 |
| [K].hGGLYHENmR.[R]            | N-Term(iTRAQ4plex); M9(Oxidati | 1 | 1 |
| [R].ecDTDGWTNDIPIcEVVk.[C]    | N-Term(iTRAQ4plex); C2(Carbam  | 1 | 1 |
| [K].vSVLcQENYLIQEGEEITck.[D]  | N-Term(iTRAQ4plex); C5(Carbam  | 1 | 1 |
| [K].tkEEYGHSEVVEYYcNPR.[F]    | N-Term(iTRAQ4plex); K2(iTRAQ4  | 1 | 1 |
| [R].eIMENYNIALR.[W]           | N-Term(iTRAQ4plex)             | 2 | 2 |
| [K].sSNLIILEEHLk.[N]          | N-Term(iTRAQ4plex); K12(iTRAQ  | 1 | 1 |
| [K].sSNLIILEEHLk.[N]          | N-Term(iTRAQ4plex); K12(iTRAQ  | 1 | 1 |
| [R].fDEFFSEGCAPGsk.[K]        | N-Term(iTRAQ4plex); C9(Carbam  | 1 | 1 |
| [R].fDEFFSEGCAPGsk.[K]        | N-Term(iTRAQ4plex); C9(Carbam  | 1 | 1 |
| [R].fDEFFSEGCAPGsk.[K]        | N-Term(iTRAQ4plex); C9(Carbam  | 1 | 1 |
| [K].wcALSHHER.[L]             | N-Term(iTRAQ4plex); C2(Carbam  | 1 | 1 |
| [R].dQYELLcLDNTR.[K]          | N-Term(iTRAQ4plex); C7(Carbam  | 1 | 1 |
| [K].dYELLcLDGTR.[K]           | N-Term(iTRAQ4plex); C6(Carbam  | 1 | 1 |
| [K].kDSGFQmNQLR.[G]           | N-Term(iTRAQ4plex); K1(iTRAQ4  | 1 | 1 |
| [K].wcALSHHER.[L]             | N-Term(iTRAQ4plex); C2(Carbam  | 1 | 1 |
| [K].dcHLAQVPSHTVVAR.[S]       | N-Term(iTRAQ4plex); C2(Carbam  | 1 | 1 |
| [K].kDSGFQMNQLR.[G]           | N-Term(iTRAQ4plex); K1(iTRAQ4  | 1 | 1 |
| [K].hSTIFENLANK.[A]           | N-Term(iTRAQ4plex); K11(iTRAQ  | 1 | 1 |
| [K].hSTIFENLANK.[A]           | N-Term(iTRAQ4plex); K11(iTRAQ  | 1 | 1 |
| [K].mYLGYEYVTAIR.[N]          | N-Term(iTRAQ4plex)             | 1 | 1 |
| [K].mYLGYEYVTAIR.[N]          | N-Term(iTRAQ4plex)             | 1 | 1 |
| [K].cSTSSLLEAcTFR.[R]         | N-Term(iTRAQ4plex); C1(Carbam  | 1 | 1 |
| [K].eFQLFSSPHGk.[D]           | N-Term(iTRAQ4plex); K11(iTRAQ  | 1 | 1 |
| [K].eFQLFSSPHGk.[D]           | N-Term(iTRAQ4plex); K11(iTRAQ  | 1 | 1 |
| [K].hSTIFENLANK.[A]           | N-Term(iTRAQ4plex); K11(iTRAQ  | 1 | 1 |
| [K].eDPQTFYYAVAVVk.[K]        | N-Term(iTRAQ4plex); K14(iTRAQ  | 1 | 1 |
| [K].eDPQTFYYAVAVVk.[K]        | N-Term(iTRAQ4plex); K14(iTRAQ  | 1 | 1 |
| [K].cDEWSVNSVgk.[I]           | N-Term(iTRAQ4plex); C1(Carbam  | 1 | 1 |
| [R].dDTVcLAK.[L]              | N-Term(iTRAQ4plex); C5(Carbam  | 1 | 1 |
| [R].wcAVSEHEATk.[C]           | N-Term(iTRAQ4plex); C2(Carbam  | 1 | 1 |
| [R].TAGWNIPMGLLYnk.[I]        | N-Term(iTRAQ4plex); K14(iTRAQ  | 1 | 1 |
| [R].TAGWNIPMGLLYnk.[I]        | N-Term(iTRAQ4plex); K14(iTRAQ  | 1 | 1 |
| [K].dGAGDVAfVk.[H]            | N-Term(iTRAQ4plex); K10(iTRAQ  | 1 | 1 |
| [K].yLGEEYVk.[A]              | N-Term(iTRAQ4plex); K8(iTRAQ4  | 1 | 1 |
| [K].aDRDQYELLcLDNTR.[K]       | N-Term(iTRAQ4plex); C10(Carbar | 1 | 1 |
| [K].eDLIWELLNQAQEHFGk.[D]     | N-Term(iTRAQ4plex); K17(iTRAQ  | 1 | 1 |
| [K].aDRDQYELLcLDNTR.[K]       | N-Term(iTRAQ4plex); C10(Carbar | 1 | 1 |
| [K].svIPSDGSPVAcVk.[K]        | N-Term(iTRAQ4plex); C12(Carbar | 1 | 1 |
| [K].eGYYGYTGAFR.[C]           | N-Term(iTRAQ4plex)             | 1 | 1 |
| [K].sASDLTWDNLk.[G]           | N-Term(iTRAQ4plex); K11(iTRAQ  | 1 | 1 |
| [K].sASDLTWDNLk.[G]           | N-Term(iTRAQ4plex); K11(iTRAQ  | 1 | 1 |

|                             |                                |   |   |
|-----------------------------|--------------------------------|---|---|
| [R].kPVEEYANcHLAR.[A]       | N-Term(iTRAQ4plex); K1(iTRAQ4  | 1 | 1 |
| [K].dcHLAQVPSHTVVAR.[S]     | N-Term(iTRAQ4plex); C2(Carbam  | 1 | 1 |
| [K].dcHLAQVPSHTVVAR.[S]     | N-Term(iTRAQ4plex); C2(Carbam  | 1 | 1 |
| [R].wcAVSEHEATk.[C]         | N-Term(iTRAQ4plex); C2(Carbam  | 1 | 1 |
| [R].kPVEEYANcHLAR.[A]       | N-Term(iTRAQ4plex); K1(iTRAQ4  | 1 | 1 |
| [R].kPVEEYANcHLAR.[A]       | N-Term(iTRAQ4plex); K1(iTRAQ4  | 1 | 1 |
| [R].eGTcPEAPTDEckPVk.[W]    | N-Term(iTRAQ4plex); C4(Carbam  | 1 | 1 |
| [R].eGTcPEAPTDEckPVk.[W]    | N-Term(iTRAQ4plex); C4(Carbam  | 1 | 1 |
| [R].eGTcPEAPTDEckPVk.[W]    | N-Term(iTRAQ4plex); C4(Carbam  | 1 | 1 |
| [R].eGTcPEAPTDEckPVk.[W]    | N-Term(iTRAQ4plex); C4(Carbam  | 1 | 1 |
| [R].eGTcPEAPTDEckPVk.[W]    | N-Term(iTRAQ4plex); C4(Carbam  | 1 | 1 |
| [R].eGTcPEAPTDEckPVk.[W]    | N-Term(iTRAQ4plex); C4(Carbam  | 1 | 1 |
| [R].eGTcPEAPTDEckPVk.[W]    | N-Term(iTRAQ4plex); C4(Carbam  | 1 | 1 |
| [K].dSAHGFLk.[V]            | N-Term(iTRAQ4plex); K8(iTRAQ4  | 1 | 1 |
| [R].eGTcPEAPTDEckPVk.[W]    | N-Term(iTRAQ4plex); C4(Carbam  | 1 | 1 |
| [R].eGTcPEAPTDEckPVk.[W]    | N-Term(iTRAQ4plex); C4(Carbam  | 1 | 1 |
| [R].eGTcPEAPTDEckPVk.[W]    | N-Term(iTRAQ4plex); C4(Carbam  | 1 | 1 |
| [R].sAGWNIPIGLLYcDLPEPR.[K] | N-Term(iTRAQ4plex); C13(Carbar | 1 | 1 |
| [R].sAGWNIPIGLLYcDLPEPR.[K] | N-Term(iTRAQ4plex); C13(Carbar | 1 | 1 |
| [R].eGTcPEAPTDEckPVk.[W]    | N-Term(iTRAQ4plex); C4(Carbam  | 1 | 1 |
| [K].hQTVPQNTGGk.[N]         | N-Term(iTRAQ4plex); K11(iTRAQ  | 1 | 1 |
| [K].dcHLAQVPSHTVVAR.[S]     | N-Term(iTRAQ4plex); C2(Carbam  | 1 | 1 |
| [R].eGTcPEAPTDEckPVk.[W]    | N-Term(iTRAQ4plex); C4(Carbam  | 1 | 1 |
| [R].eGTcPEAPTDEckPVk.[W]    | N-Term(iTRAQ4plex); C4(Carbam  | 1 | 1 |
| [K].hQTVPQNTGGk.[N]         | N-Term(iTRAQ4plex); K11(iTRAQ  | 1 | 1 |
| [R].eGTcPEAPTDEckPVk.[W]    | N-Term(iTRAQ4plex); C4(Carbam  | 1 | 1 |
| [K].dkEAcVhk.[I]            | N-Term(iTRAQ4plex); K2(iTRAQ4  | 1 | 1 |
| [K].hQTVPQNTGGk.[N]         | N-Term(iTRAQ4plex); K11(iTRAQ  | 1 | 1 |
| [K].wcALSHHER.[L]           | N-Term(iTRAQ4plex); C2(Carbam  | 1 | 1 |
| [R].fDEFFSEGcAPGSK.[K]      | N-Term(iTRAQ4plex); C9(Carbam  | 1 | 1 |
| [K].WcALSHHER.[L]           | C2(Carbamidomethyl)            | 1 | 1 |
| [K].wcALSHHER.[L]           | N-Term(iTRAQ4plex); C2(Carbam  | 1 | 1 |
| [K].aSYLDcIR.[A]            | N-Term(iTRAQ4plex); C6(Carbam  | 1 | 1 |
| [K].hQTVPQNTGGk.[N]         | N-Term(iTRAQ4plex); K11(iTRAQ  | 1 | 1 |
| [R].aPNHAVVTR.[K]           | N-Term(iTRAQ4plex)             | 1 | 1 |
| [K].hQTVPQNTGGk.[N]         | N-Term(iTRAQ4plex); K11(iTRAQ  | 1 | 1 |
| [K].hSTIFENLANK.[A]         | N-Term(iTRAQ4plex); K11(iTRAQ  | 1 | 1 |
| [K].scHTGLGR.[S]            | N-Term(iTRAQ4plex); C2(Carbam  | 1 | 1 |
| [R].DQYELLcLDNTR.[K]        | C7(Carbamidomethyl)            | 1 | 1 |
| [R].wcAVSEHEATk.[C]         | N-Term(iTRAQ4plex); C2(Carbam  | 1 | 1 |
| [K].sVIPSDGPSVAcVk.[K]      | N-Term(iTRAQ4plex); C12(Carbar | 1 | 1 |
| [R].dDTVcLAK.[L]            | N-Term(iTRAQ4plex); C5(Carbam  | 1 | 1 |
| [K].kDSSLck.[L]             | N-Term(iTRAQ4plex); K1(iTRAQ4  | 1 | 1 |
| [K].hQTVPQNTGGk.[N]         | N-Term(iTRAQ4plex); K11(iTRAQ  | 1 | 1 |
| [K].HSTIFENLANK.[A]         | K11(iTRAQ4plex)                | 1 | 1 |
| [K].kSASDLTWDNLk.[G]        | N-Term(iTRAQ4plex); K1(iTRAQ4  | 1 | 1 |
| [K].DGAGDVAfVk.[H]          | K10(iTRAQ4plex)                | 1 | 1 |
| [K].yLGEEYVk.[A]            | N-Term(iTRAQ4plex); K8(iTRAQ4  | 1 | 1 |
| [K].eQLFSSPHGk.[D]          | N-Term(iTRAQ4plex); K11(iTRAQ  | 1 | 1 |
| [K].kASYLDcIR.[A]           | N-Term(iTRAQ4plex); K1(iTRAQ4  | 1 | 1 |
| [R].dDTVcLAK.[L]            | N-Term(iTRAQ4plex); C5(Carbam  | 1 | 1 |
| [K].iEcVSAETTEDcIAk.[I]     | N-Term(iTRAQ4plex); C3(Carbam  | 1 | 1 |



|                                      |                                |   |   |
|--------------------------------------|--------------------------------|---|---|
| [R].dDTVcLAK.[L]                     | N-Term(iTRAQ4plex); C5(Carbam  | 1 | 1 |
| [K].MYLGYEYVTAIR.[N]                 |                                | 1 | 1 |
| [AK].gDVAFVk.[H]                     | N-Term(iTRAQ4plex); K7(iTRAQ4  | 1 | 1 |
| [K].DYELLcLDGTR.[K]                  | C6(Carbamidomethyl)            | 1 | 1 |
| [R].DDTVcLAK.[L]                     | C5(Carbamidomethyl); K8(iTRAC  | 1 | 1 |
| [K].mYLGYEYVTAIR.[N]                 | N-Term(iTRAQ4plex)             | 1 | 1 |
| [K].dSGFQMNLQ.[G]                    | N-Term(iTRAQ4plex)             | 1 | 1 |
| [AK].gDVAFVk.[H]                     | N-Term(iTRAQ4plex); K7(iTRAQ4  | 1 | 1 |
| [K].iEcVSAETTEDcIAk.[I]              | N-Term(iTRAQ4plex); C3(Carbam  | 1 | 1 |
| [K].hQTVPQNTGGk.[N]                  | N-Term(iTRAQ4plex); K11(iTRAQ  | 1 | 1 |
| [K].hSTIFENLANK.[A]                  | N-Term(iTRAQ4plex); K11(iTRAQ  | 1 | 1 |
| [K].aDRDQYELLcLDNTR.[K]              | N-Term(iTRAQ4plex); C10(Carbar | 1 | 1 |
| [R].EGTcPEAPTDEckPVk.[W]             | C4(Carbamidomethyl); C12(Carb  | 1 | 1 |
| [AK].gDVAFVk.[H]                     | N-Term(iTRAQ4plex); K7(iTRAQ4  | 1 | 1 |
| [R].wcAVSEHEATk.[C]                  | N-Term(iTRAQ4plex); C2(Carbam  | 1 | 1 |
| [K].dGAGDVAFVk.[H]                   | N-Term(iTRAQ4plex); K10(iTRAQ  | 1 | 1 |
| [R].sSPVVIDASTAIDAPSNLR.[F]          | N-Term(iTRAQ4plex)             | 1 | 1 |
| [R].eESPLLIgQQSTVSDVPR.[D]           | N-Term(iTRAQ4plex)             | 1 | 1 |
| [R].dLQFVEVTDVk.[V]                  | N-Term(iTRAQ4plex); K11(iTRAQ  | 1 | 1 |
| [R].vPGTSTSATLTGLTR.[G]              | N-Term(iTRAQ4plex)             | 1 | 1 |
| [K].eiNLAPDSSSVVSGMLMVATk.[Y]        | N-Term(iTRAQ4plex); K21(iTRAQ  | 1 | 1 |
| [R].wSRPQAPITGYR.[I]                 | N-Term(iTRAQ4plex)             | 1 | 1 |
| [R].wSRPQAPITGYR.[I]                 | N-Term(iTRAQ4plex)             | 1 | 1 |
| [K].iYLTLNDNAR.[S]                   | N-Term(iTRAQ4plex)             | 1 | 1 |
| [R].tNTNVNcPIEcFMPLDVQADR.[E]        | N-Term(iTRAQ4plex); C7(Carbam  | 1 | 1 |
| [R].gFNcESkPEAEETcFDk.[Y]            | N-Term(iTRAQ4plex); C4(Carbam  | 1 | 1 |
| [R].rPGGEPSPGTTGQSYNQYSQR.[Y]        | N-Term(iTRAQ4plex)             | 1 | 1 |
| [K].vVTPLSPPTNLHLEANPDTGVLTVSWER.[S] | N-Term(iTRAQ4plex)             | 1 | 1 |
| [R].eSkPLTAQQTTk.[L]                 | N-Term(iTRAQ4plex); K3(iTRAQ4  | 1 | 1 |
| [R].qDGHLWcSTTSNYEQDQk.[Y]           | N-Term(iTRAQ4plex); C7(Carbam  | 1 | 1 |
| [K].vTIMWTPPEsAVTGYR.[V]             | N-Term(iTRAQ4plex)             | 1 | 1 |
| [R].qDGHLWcSTTSNYEQDQk.[Y]           | N-Term(iTRAQ4plex); C7(Carbam  | 1 | 1 |
| [K].cDPHEATcYDDGk.[T]                | N-Term(iTRAQ4plex); C1(Carbam  | 1 | 1 |
| [K].hYQINQQWER.[T]                   | N-Term(iTRAQ4plex)             | 1 | 1 |
| [R].qYNVGPSVsk.[Y]                   | N-Term(iTRAQ4plex); K10(iTRAQ  | 1 | 1 |
| [K].tyHVGEQWQk.[E]                   | N-Term(iTRAQ4plex); K10(iTRAQ  | 1 | 1 |
| [R].sSPVVIDASTAIDAPSNLR.[F]          | N-Term(iTRAQ4plex)             | 1 | 1 |
| [R].gDSPASSkPISINyR.[T]              | N-Term(iTRAQ4plex); K8(iTRAQ4  | 1 | 1 |
| [R].cHEGGQSYk.[I]                    | N-Term(iTRAQ4plex); C1(Carbam  | 1 | 1 |
| [R].dAPIVnk.[V]                      | N-Term(iTRAQ4plex); K7(iTRAQ4  | 1 | 1 |
| [K].dSMIWDCtClGAGR.[G]               | N-Term(iTRAQ4plex); C7(Carbam  | 1 | 1 |
| [R].iTYGETGGNSPVQEFTVPGSk.[S]        | N-Term(iTRAQ4plex); K21(iTRAQ  | 1 | 1 |
| [K].yEVSvYAlk.[D]                    | N-Term(iTRAQ4plex); K9(iTRAQ4  | 1 | 1 |
| [K].gEWTckPIAEk.[C]                  | N-Term(iTRAQ4plex); C5(Carbam  | 1 | 1 |
| [R].nTFAEVTGLSPGVTYFk.[V]            | N-Term(iTRAQ4plex); K18(iTRAQ  | 1 | 1 |
| [K].ILcQcLGFSGHFR.[C]                | N-Term(iTRAQ4plex); C3(Carbam  | 1 | 1 |
| [R].dAPIVnk.[V]                      | N-Term(iTRAQ4plex); K7(iTRAQ4  | 1 | 1 |
| [K].yEkPGSPPR.[E]                    | N-Term(iTRAQ4plex); K3(iTRAQ4  | 1 | 1 |
| [R].rPGGEPSPGTTGQSYNQYSQR.[Y]        | N-Term(iTRAQ4plex)             | 1 | 1 |
| [R].iScTIANR.[C]                     | N-Term(iTRAQ4plex); C3(Carbam  | 1 | 1 |
| [K].sSTATISGLkPGVDYITVYAVTGR.[G]     | N-Term(iTRAQ4plex); K9(iTRAQ4  | 1 | 1 |
| [R].gDSPASSkPISINyR.[T]              | N-Term(iTRAQ4plex); K8(iTRAQ4  | 1 | 1 |



|                                   |                                     |   |   |
|-----------------------------------|-------------------------------------|---|---|
| [R].eTAVDGELVVLYDvk.[R]           | N-Term(iTRAQ4plex); K15(iTRAQ4plex) | 1 | 1 |
| [R].eTAVDGELVVLYDvk.[R]           | N-Term(iTRAQ4plex); K15(iTRAQ4plex) | 1 | 1 |
| [R].eTAVDGELVVLYDvk.[R]           | N-Term(iTRAQ4plex); K15(iTRAQ4plex) | 1 | 1 |
| [R].eTAVDGELVVLYDvk.[R]           | N-Term(iTRAQ4plex); K15(iTRAQ4plex) | 1 | 1 |
| [R].eTAVDGELVVLYDvk.[R]           | N-Term(iTRAQ4plex); K15(iTRAQ4plex) | 1 | 1 |
| [R].eTAVDGELVVLYDvk.[R]           | N-Term(iTRAQ4plex); K15(iTRAQ4plex) | 1 | 1 |
| [R].eTAVDGELVVLYDvk.[R]           | N-Term(iTRAQ4plex); K15(iTRAQ4plex) | 1 | 1 |
| [R].eTAVDGELVVLYDvk.[R]           | N-Term(iTRAQ4plex); K15(iTRAQ4plex) | 1 | 1 |
| [R].eTAVDGELVVLYDvk.[R]           | N-Term(iTRAQ4plex); K15(iTRAQ4plex) | 1 | 1 |
| [R].eTAVDGELVVLYDvk.[R]           | N-Term(iTRAQ4plex); K15(iTRAQ4plex) | 1 | 1 |
| [R].eTAVDGELVVLYDvk.[R]           | N-Term(iTRAQ4plex); K15(iTRAQ4plex) | 1 | 1 |
| [R].eTAVDGELVVLYDvk.[R]           | N-Term(iTRAQ4plex); K15(iTRAQ4plex) | 1 | 1 |
| [R].eTAVDGELVVLYDvk.[R]           | N-Term(iTRAQ4plex); K15(iTRAQ4plex) | 1 | 1 |
| [R].eTAVDGELVVLYDvk.[R]           | N-Term(iTRAQ4plex); K15(iTRAQ4plex) | 1 | 1 |
| [R].eTAVDGELVVLYDvk.[R]           | N-Term(iTRAQ4plex); K15(iTRAQ4plex) | 1 | 1 |
| [R].eTAVDGELVVLYDvk.[R]           | N-Term(iTRAQ4plex); K15(iTRAQ4plex) | 1 | 1 |
| [R].eTAVDGELVVLYDvk.[R]           | N-Term(iTRAQ4plex); K15(iTRAQ4plex) | 1 | 1 |
| [R].mLADAPPQDPScSGALYGSk.[V]      | N-Term(iTRAQ4plex); C12(Carbamoyl)  | 1 | 1 |
| [R].mLADAPPQDPScSGALYGSk.[V]      | N-Term(iTRAQ4plex); C12(Carbamoyl)  | 1 | 1 |
| [R].mLADAPPQDPScSGALYGSk.[V]      | N-Term(iTRAQ4plex); C12(Carbamoyl)  | 1 | 1 |
| [R].mLADAPPQDPScSGALYGSk.[V]      | N-Term(iTRAQ4plex); C12(Carbamoyl)  | 1 | 1 |
| [K].kFYNQVSTPLLR.[N]              | N-Term(iTRAQ4plex); K1(iTRAQ4plex)  | 1 | 1 |
| [R].mATTMIQSk.[V]                 | N-Term(iTRAQ4plex); K9(iTRAQ4plex)  | 1 | 1 |
| [R].LSNENHGIAQR.[I]               | N-Term(iTRAQ4plex)                  | 1 | 1 |
| [R].LSNENHGIAQR.[I]               | N-Term(iTRAQ4plex)                  | 1 | 1 |
| [R].eTAVDGELVVLYDvk.[R]           | N-Term(iTRAQ4plex); K15(iTRAQ4plex) | 1 | 1 |
| [R].eTAVDGELVVLYDvk.[R]           | N-Term(iTRAQ4plex); K15(iTRAQ4plex) | 1 | 1 |
| [R].kLGSYEHR.[I]                  | N-Term(iTRAQ4plex); K1(iTRAQ4plex)  | 1 | 1 |
| [R].sLPGESEEMMEVDQVTLYSYk.[V]     | N-Term(iTRAQ4plex); K22(iTRAQ4plex) | 1 | 1 |
| [R].sLPGESEEMMEVDQVTLYSYk.[V]     | N-Term(iTRAQ4plex); K22(iTRAQ4plex) | 1 | 1 |
| [R].mATTMIQSk.[V]                 | N-Term(iTRAQ4plex); M1(Oxidation)   | 1 | 1 |
| [R].mATTMIQSk.[V]                 | N-Term(iTRAQ4plex); M5(Oxidation)   | 1 | 1 |
| [K].aHVSFkPTVAQQR.[I]             | N-Term(iTRAQ4plex); K6(iTRAQ4plex)  | 1 | 1 |
| [K].aHVSFkPTVAQQR.[I]             | N-Term(iTRAQ4plex); K6(iTRAQ4plex)  | 1 | 1 |
| [K].aHVSFkPTVAQQR.[I]             | N-Term(iTRAQ4plex); K6(iTRAQ4plex)  | 1 | 1 |
| [K].aHVSFkPTVAQQR.[I]             | N-Term(iTRAQ4plex); K6(iTRAQ4plex)  | 1 | 1 |
| [K].aHVSFkPTVAQQR.[I]             | N-Term(iTRAQ4plex); K6(iTRAQ4plex)  | 1 | 1 |
| [R].FLHVPDTFEGHFDGVPVISK.[G]      | K20(iTRAQ4plex)                     | 1 | 1 |
| [K].vVNNSPQPQNVVFDVQIPk.[G]       | N-Term(iTRAQ4plex); K19(iTRAQ4plex) | 1 | 1 |
| [K].vVNNSPQPQNVVFDVQIPk.[G]       | N-Term(iTRAQ4plex); K19(iTRAQ4plex) | 1 | 1 |
| [K].vVNNSPQPQNVVFDVQIPk.[G]       | N-Term(iTRAQ4plex); K19(iTRAQ4plex) | 1 | 1 |
| [R].flHVPDTFEGHFDGVPVISK.[G]      | N-Term(iTRAQ4plex); K20(iTRAQ4plex) | 1 | 1 |
| [R].nVQFNYPHTSVTDVTQNNFNHYFGGSEIV | N-Term(iTRAQ4plex); K33(iTRAQ4plex) | 1 | 1 |
| [R].flHVPDTFEGHFDGVPVISK.[G]      | N-Term(iTRAQ4plex); K20(iTRAQ4plex) | 1 | 1 |
| [K].iQPSGGTNINEALLR.[A]           | N-Term(iTRAQ4plex)                  | 1 | 1 |
| [K].iQPSGGTNINEALLR.[A]           | N-Term(iTRAQ4plex)                  | 1 | 1 |
| [R].LSNENHGIAQR.[I]               |                                     | 1 | 1 |
| [R].LSNENHGIAQR.[I]               |                                     | 1 | 1 |
| [R].aEDHFSVIDFNQIR.[T]            | N-Term(iTRAQ4plex)                  | 1 | 1 |
| [K].AHVSFkPTVAQQR.[I]             | K6(iTRAQ4plex)                      | 1 | 1 |
| [K].vQFELHYQEVk.[W]               | N-Term(iTRAQ4plex); K11(iTRAQ4plex) | 1 | 1 |
| [R].sLAPTAaAkR.[R]                | N-Term(iTRAQ4plex); K9(iTRAQ4plex)  | 1 | 1 |
| [K].vQFELHYQEVk.[W]               | N-Term(iTRAQ4plex); K11(iTRAQ4plex) | 1 | 1 |

|                                      |                                     |   |   |
|--------------------------------------|-------------------------------------|---|---|
| [R].SLAPATAAAk.[R]                   | K9(iTRAQ4plex)                      | 1 | 1 |
| [K].vQFELHYQEVk.[W]                  | N-Term(iTRAQ4plex); K11(iTRAQ4plex) | 1 | 1 |
| [K].vQFELHYQEVk.[W]                  | N-Term(iTRAQ4plex); K11(iTRAQ4plex) | 1 | 1 |
| [K].vQFELHYQEVk.[W]                  | N-Term(iTRAQ4plex); K11(iTRAQ4plex) | 1 | 1 |
| [K].vQFELHYQEVk.[W]                  | N-Term(iTRAQ4plex); K11(iTRAQ4plex) | 1 | 1 |
| [K].vQFELHYQEVk.[W]                  | N-Term(iTRAQ4plex); K11(iTRAQ4plex) | 1 | 1 |
| [K].vQFELHYQEVk.[W]                  | N-Term(iTRAQ4plex); K11(iTRAQ4plex) | 1 | 1 |
| [K].hLEVDVWVIEPQGLR.[F]              | N-Term(iTRAQ4plex)                  | 1 | 1 |
| [K].hLEVDVWVIEPQGLR.[F]              | N-Term(iTRAQ4plex)                  | 1 | 1 |
| [K].hLEVDVWVIEPQGLR.[F]              | N-Term(iTRAQ4plex)                  | 1 | 1 |
| [K].tILDDLRAEDHFSVIDFNQIR.[T]        | N-Term(iTRAQ4plex)                  | 1 | 1 |
| [K].hLEVDVWVIEPQGLR.[F]              | N-Term(iTRAQ4plex)                  | 1 | 1 |
| [R].sILQMSLDHHIVTPLTSLVIENEAGDER.[M] | N-Term(iTRAQ4plex)                  | 1 | 1 |
| [R].SSALDMENFR.[T]                   |                                     | 1 | 1 |
| [R].kLGSYEHR.[I]                     | N-Term(iTRAQ4plex); K1(iTRAQ4plex)  | 1 | 1 |
| [K].dkHADPDFTR.[K]                   | N-Term(iTRAQ4plex); K2(iTRAQ4plex)  | 1 | 1 |
| [R].kLWAYLTINQLLAER.[S]              | N-Term(iTRAQ4plex); K1(iTRAQ4plex)  | 1 | 1 |
| [R].kLWAYLTINQLLAER.[S]              | N-Term(iTRAQ4plex); K1(iTRAQ4plex)  | 1 | 1 |
| [R].sLAPATAAAk.[R]                   | N-Term(iTRAQ4plex); K9(iTRAQ4plex)  | 1 | 1 |
| [R].sLAPATAAAk.[R]                   | N-Term(iTRAQ4plex); K9(iTRAQ4plex)  | 1 | 1 |
| [R].sLAPATAAAk.[R]                   | N-Term(iTRAQ4plex); K9(iTRAQ4plex)  | 1 | 1 |
| [R].fLHVPDTFEGHFDGVPVISK.[G]         | N-Term(iTRAQ4plex); K20(iTRAQ4plex) | 1 | 1 |
| [R].fLHVPDTFEGHFDGVPVISK.[G]         | N-Term(iTRAQ4plex); K20(iTRAQ4plex) | 1 | 1 |
| [R].fLHVPDTFEGHFDGVPVISK.[G]         | N-Term(iTRAQ4plex); K20(iTRAQ4plex) | 1 | 1 |
| [R].fLHVPDTFEGHFDGVPVISK.[G]         | N-Term(iTRAQ4plex); K20(iTRAQ4plex) | 1 | 1 |
| [R].fLHVPDTFEGHFDGVPVISK.[G]         | N-Term(iTRAQ4plex); K20(iTRAQ4plex) | 1 | 1 |
| [R].fLHVPDTFEGHFDGVPVISK.[G]         | N-Term(iTRAQ4plex); K20(iTRAQ4plex) | 1 | 1 |
| [K].nILFVIDVSGSMWGVk.[M]             | N-Term(iTRAQ4plex); K16(iTRAQ4plex) | 1 | 1 |
| [K].nILFVIDVSGSMWGVk.[M]             | N-Term(iTRAQ4plex); K16(iTRAQ4plex) | 1 | 1 |
| [R].tEVNVLPGAK.[V]                   | N-Term(iTRAQ4plex); K10(iTRAQ4plex) | 1 | 1 |
| [R].tEVNVLPGAK.[V]                   | N-Term(iTRAQ4plex); K10(iTRAQ4plex) | 1 | 1 |
| [R].tEVNVLPGAK.[V]                   | N-Term(iTRAQ4plex); K10(iTRAQ4plex) | 1 | 1 |
| [K].IWAYLTINQLLAER.[S]               | N-Term(iTRAQ4plex)                  | 1 | 1 |
| [K].IWAYLTINQLLAER.[S]               | N-Term(iTRAQ4plex)                  | 1 | 1 |
| [R].sSALDMENFR.[T]                   | N-Term(iTRAQ4plex)                  | 1 | 1 |
| [R].sSALDMENFR.[T]                   | N-Term(iTRAQ4plex)                  | 1 | 1 |
| [K].fYNQVSTPLLR.[N]                  | N-Term(iTRAQ4plex)                  | 1 | 1 |
| [K].fYNQVSTPLLR.[N]                  | N-Term(iTRAQ4plex)                  | 1 | 1 |
| [K].fYNQVSTPLLR.[N]                  | N-Term(iTRAQ4plex)                  | 1 | 1 |
| [K].IDQIESVITATSANTQLVLETLAQMDDLQD   | N-Term(iTRAQ4plex); K34(iTRAQ4plex) | 1 | 1 |
| [R].iYGNQDTSSQLk.[K]                 | N-Term(iTRAQ4plex); K12(iTRAQ4plex) | 1 | 1 |
| [R].iYGNQDTSSQLk.[K]                 | N-Term(iTRAQ4plex); K12(iTRAQ4plex) | 1 | 1 |
| [K].IDQIESVITATSANTQLVLETLAQMDDLQD   | N-Term(iTRAQ4plex); K34(iTRAQ4plex) | 1 | 1 |
| [R].mLADAPPQDPScSGALYYGSK.[V]        | N-Term(iTRAQ4plex); M1(Oxidation)   | 1 | 1 |
| [R].LSNENHGIAQR.[I]                  |                                     | 1 | 1 |
| [R].nDLISATk.[T]                     | N-Term(iTRAQ4plex); K8(iTRAQ4plex)  | 1 | 1 |
| [K].aHVSFKPTVAQQR.[I]                | N-Term(iTRAQ4plex); K6(iTRAQ4plex)  | 1 | 1 |
| [R].ISNENHGIAQR.[I]                  | N-Term(iTRAQ4plex)                  | 1 | 1 |
| [R].eTAVDGELVVLYDVk.[R]              | N-Term(iTRAQ4plex); K15(iTRAQ4plex) | 1 | 1 |
| [K].aHVSFKPTVAQQR.[I]                | N-Term(iTRAQ4plex); K6(iTRAQ4plex)  | 1 | 1 |
| [R].sLAPATAAAk.[R]                   | N-Term(iTRAQ4plex); K9(iTRAQ4plex)  | 1 | 1 |
| [R].sLAPATAAAk.[R]                   | N-Term(iTRAQ4plex); K9(iTRAQ4plex)  | 1 | 1 |

|                                   |                                |   |   |
|-----------------------------------|--------------------------------|---|---|
| [R].FLHVPDTFEGHFDGVPVIsk.[G]      | K20(iTRAQ4plex)                | 1 | 1 |
| [R].aEDHFSVIDFNQIR.[T]            | N-Term(iTRAQ4plex)             | 1 | 1 |
| [R].FLHVPDTFEGHFDGVPVIsk.[G]      | K20(iTRAQ4plex)                | 1 | 1 |
| [K].aHVSfKPTVAQQR.[I]             | N-Term(iTRAQ4plex); K6(iTRAQ4  | 1 | 1 |
| [R].tWRNDLISATk.[T]               | N-Term(iTRAQ4plex); K11(iTRAQ  | 1 | 1 |
| [R].AEDHFSVIDFNQIR.[T]            |                                | 1 | 1 |
| [R].ISNENHGIAQR.[I]               | N-Term(iTRAQ4plex)             | 1 | 1 |
| [K].hLEVDVWVIEPQGLR.[F]           | N-Term(iTRAQ4plex)             | 1 | 1 |
| [R].eTAVDGELVVLYDvk.[R]           | N-Term(iTRAQ4plex); K15(iTRAQ  | 1 | 1 |
| [R].eTAVDGELVVLYDvk.[R]           | N-Term(iTRAQ4plex); K15(iTRAQ  | 1 | 1 |
| [R].aEDHFSVIDFNQIR.[T]            | N-Term(iTRAQ4plex)             | 1 | 1 |
| [K].AHVSfKPTVAQQR.[I]             | K6(iTRAQ4plex)                 | 1 | 1 |
| [R].TEVNVLPgAk.[V]                | K10(iTRAQ4plex)                | 1 | 1 |
| [K].tQVADAK.[R]                   | N-Term(iTRAQ4plex); K7(iTRAQ4  | 1 | 1 |
| [R].ISNENHGIAQR.[I]               | N-Term(iTRAQ4plex)             | 1 | 1 |
| [K].fQLVAENR.[R]                  | N-Term(iTRAQ4plex)             | 1 | 1 |
| [R].nDLISATk.[T]                  | N-Term(iTRAQ4plex); K8(iTRAQ4  | 1 | 1 |
| [R].sSALDmENFR.[T]                | N-Term(iTRAQ4plex); M6(Oxidat  | 1 | 1 |
| [K].aHVSfKPTVAQQR.[I]             | N-Term(iTRAQ4plex); K6(iTRAQ4  | 1 | 1 |
| [K].HADPDFTR.[K]                  |                                | 1 | 1 |
| [K].FYNQVSTPLLR.[N]               |                                | 1 | 1 |
| [K].kFYNQVSTPLLR.[N]              | N-Term(iTRAQ4plex); K1(iTRAQ4  | 1 | 1 |
| [K].tQVADAK.[R]                   | N-Term(iTRAQ4plex); K7(iTRAQ4  | 1 | 1 |
| [R].FLHVPDTFEGHFDGVPVIsk.[G]      | K20(iTRAQ4plex)                | 1 | 1 |
| [R].mLADAPPQDPScSGALYYGsk.[V]     | N-Term(iTRAQ4plex); C12(Carbar | 1 | 1 |
| [R].mLADAPPQDPScSGALYYGsk.[V]     | N-Term(iTRAQ4plex); M1(Oxidat  | 1 | 1 |
| [R].SSALDmENFR.[T]                | M6(Oxidation)                  | 1 | 1 |
| [R].sSIkEKTvGR.[A]                | N-Term(iTRAQ4plex); K4(iTRAQ4  | 1 | 1 |
| [R].SLAPTAAAKR.[R]                | K9(iTRAQ4plex)                 | 1 | 1 |
| [K].aHVSfKPTVAQQR.[I]             | N-Term(iTRAQ4plex); K6(iTRAQ4  | 1 | 1 |
| [K].tILDDLr.[A]                   | N-Term(iTRAQ4plex)             | 1 | 1 |
| [R].eTAVDGELVVLYDvk.[R]           | N-Term(iTRAQ4plex); K15(iTRAQ  | 1 | 1 |
| [K].rLSNENHGIAQR.[I]              | N-Term(iTRAQ4plex)             | 1 | 1 |
| [R].mATTMIQsk.[V]                 | N-Term(iTRAQ4plex); K9(iTRAQ4  | 1 | 1 |
| [K].qTVEAMk.[T]                   | N-Term(iTRAQ4plex); K7(iTRAQ4  | 1 | 1 |
| [K].HADPDFTR.[K]                  |                                | 1 | 1 |
| [K].AHVSfKPTVAQQR.[I]             | K6(iTRAQ4plex)                 | 1 | 1 |
| [K].hLEVDVWVIEPQGLR.[F]           | N-Term(iTRAQ4plex)             | 1 | 1 |
| [K].qTVEAMk.[T]                   | N-Term(iTRAQ4plex); K7(iTRAQ4  | 1 | 1 |
| [R].nVQFNYPHTSVTDVTQNNFHNYFGGSEIV | N-Term(iTRAQ4plex); K33(iTRAQ  | 1 | 1 |
| [K].qTVEAMk.[T]                   | N-Term(iTRAQ4plex); K7(iTRAQ4  | 1 | 1 |
| [K].VQSTITSr.[M]                  |                                | 1 | 1 |
| [R].nDLISATk.[T]                  | N-Term(iTRAQ4plex); K8(iTRAQ4  | 1 | 1 |
| [R].FLHVPDTFEGHFDGVPVIsk.[G]      | K20(iTRAQ4plex)                | 1 | 1 |
| [R].sLAPTAAAK.[R]                 | N-Term(iTRAQ4plex); K9(iTRAQ4  | 1 | 1 |
| [R].mATTMIQsk.[V]                 | N-Term(iTRAQ4plex); M5(Oxidat  | 1 | 1 |
| [K].tQVADAK.[R]                   | N-Term(iTRAQ4plex); K7(iTRAQ4  | 1 | 1 |
| [R].LSNENHGIAQR.[I]               |                                | 1 | 1 |
| [R].IYGNQDTSSQLk.[K]              | K12(iTRAQ4plex)                | 1 | 1 |
| [K].vQSTITSr.[M]                  | N-Term(iTRAQ4plex)             | 1 | 1 |
| [K].vQSTITSr.[M]                  | N-Term(iTRAQ4plex)             | 1 | 1 |
| [R].flHVPDTFEGHFDGVPVIsk.[G]      | N-Term(iTRAQ4plex); K20(iTRAQ  | 1 | 1 |

|                                   |                                          |   |   |
|-----------------------------------|------------------------------------------|---|---|
| [R].eTAVDGELVVLYDVk.[R]           | N-Term(iTRAQ4plex); K15(iTRAQ4plex)      | 1 | 1 |
| [K].AHVSFkPTVAQQR.[I]             | K6(iTRAQ4plex)                           | 1 | 1 |
| [K].tILDDLr.[A]                   | N-Term(iTRAQ4plex)                       | 1 | 1 |
| [K].qTVEAMk.[T]                   | N-Term(iTRAQ4plex); K7(iTRAQ4plex)       | 1 | 1 |
| [K].vVNNSPQPQNvVFDVQIPk.[G]       | N-Term(iTRAQ4plex); K19(iTRAQ4plex)      | 1 | 1 |
| [K].vVNNSPQPQNvVFDVQIPk.[G]       | N-Term(iTRAQ4plex); K19(iTRAQ4plex)      | 1 | 1 |
| [R].iYGNQDTSSQLk.[K]              | N-Term(iTRAQ4plex); K12(iTRAQ4plex)      | 1 | 1 |
| [R].mLADAPPQDPScSGALYGSk.[V]      | N-Term(iTRAQ4plex); C12(Carbamidomethyl) | 1 | 1 |
| [K].qTVEAMk.[T]                   | N-Term(iTRAQ4plex); K7(iTRAQ4plex)       | 1 | 1 |
| [R].LSNENHGIAQR.[I]               |                                          | 1 | 1 |
| [K].FYNQVSTPLLR.[N]               |                                          | 1 | 1 |
| [R].SLAPTAAk.[R]                  | K9(iTRAQ4plex)                           | 1 | 1 |
| [R].nDLISATk.[T]                  | N-Term(iTRAQ4plex); K8(iTRAQ4plex)       | 1 | 1 |
| [K].aHVSFkPTVAQQR.[I]             | N-Term(iTRAQ4plex); K6(iTRAQ4plex)       | 1 | 1 |
| [K].tQVADAK.[R]                   | N-Term(iTRAQ4plex); K7(iTRAQ4plex)       | 1 | 1 |
| [R].nDLISATk.[T]                  | N-Term(iTRAQ4plex); K8(iTRAQ4plex)       | 1 | 1 |
| [R].LSNENHGIAQR.[I]               |                                          | 1 | 1 |
| [R].aEDHFSVIDFNQIR.[T]            | N-Term(iTRAQ4plex)                       | 1 | 1 |
| [K].aHVSFkPTVAQQR.[I]             | N-Term(iTRAQ4plex); K6(iTRAQ4plex)       | 1 | 1 |
| [K].kFYNQVSTPLLR.[N]              | N-Term(iTRAQ4plex); K1(iTRAQ4plex)       | 1 | 1 |
| [R].SLAPTAAk.[R]                  | K9(iTRAQ4plex)                           | 1 | 1 |
| [R].fLHVpDTFEGHFDGVPVISk.[G]      | N-Term(iTRAQ4plex); K20(iTRAQ4plex)      | 1 | 1 |
| [K].qTVEAMk.[T]                   | N-Term(iTRAQ4plex); K7(iTRAQ4plex)       | 1 | 1 |
| [R].mATTMIQSk.[V]                 | N-Term(iTRAQ4plex); M1(Oxidation)        | 1 | 1 |
| [R].FLHVpDTFEGHFDGVPVISk.[G]      | K20(iTRAQ4plex)                          | 1 | 1 |
| [K].tILDDLr.[A]                   | N-Term(iTRAQ4plex)                       | 1 | 1 |
| [K].dkHADPDFTR.[K]                | N-Term(iTRAQ4plex); K2(iTRAQ4plex)       | 1 | 1 |
| [R].mLADAPPQDPScSGALYGSk.[V]      | N-Term(iTRAQ4plex); M1(Oxidation)        | 1 | 1 |
| [R].nVQFNYPHTSVTDVTQNNFHNyFGGSEIV | N-Term(iTRAQ4plex); K33(iTRAQ4plex)      | 1 | 1 |
| [K].aHVSFkPTVAQQR.[I]             | N-Term(iTRAQ4plex); K6(iTRAQ4plex)       | 1 | 1 |
| [R].QSEDSTFYLGERR.[T]             |                                          | 1 | 1 |
| [K].aLYLQYtDETFR.[T]              | N-Term(iTRAQ4plex)                       | 1 | 1 |
| [K].ALYLQYtDETFR.[T]              |                                          | 1 | 1 |
| [R].kaEEHlGILGPQLHADVGdk.[V]      | N-Term(iTRAQ4plex); K1(iTRAQ4plex)       | 1 | 1 |
| [K].vDKDNEdfQESNR.[M]             | N-Term(iTRAQ4plex); K3(iTRAQ4plex)       | 1 | 1 |
| [R].iYHSHIDAPk.[D]                | N-Term(iTRAQ4plex); K10(iTRAQ4plex)      | 1 | 1 |
| [R].sGAGTEDSACIPWAYYSTVDQVk.[D]   | N-Term(iTRAQ4plex); C10(Carbamidomethyl) | 1 | 1 |
| [R].sGAGTEDSACIPWAYYSTVDQVk.[D]   | N-Term(iTRAQ4plex); C10(Carbamidomethyl) | 1 | 1 |
| [R].sGAGTEDSACIPWAYYSTVDQVk.[D]   | N-Term(iTRAQ4plex); C10(Carbamidomethyl) | 1 | 1 |
| [R].sGAGTEDSACIPWAYYSTVDQVk.[D]   | N-Term(iTRAQ4plex); C10(Carbamidomethyl) | 1 | 1 |
| [R].sGAGTEDSACIPWAYYSTVDQVk.[D]   | N-Term(iTRAQ4plex); C10(Carbamidomethyl) | 1 | 1 |
| [R].sGAGTEDSACIPWAYYSTVDQVk.[D]   | N-Term(iTRAQ4plex); C10(Carbamidomethyl) | 1 | 1 |
| [R].sGAGTEDSACIPWAYYSTVDQVk.[D]   | N-Term(iTRAQ4plex); C10(Carbamidomethyl) | 1 | 1 |
| [R].sGAGTEDSACIPWAYYSTVDQVk.[D]   | N-Term(iTRAQ4plex); C10(Carbamidomethyl) | 1 | 1 |
| [R].iYHSHIDAPk.[D]                | K10(iTRAQ4plex)                          | 1 | 1 |
| [R].iYHSHIDAPk.[D]                | K10(iTRAQ4plex)                          | 1 | 1 |
| [R].SGAGTEDSACIPWAYYSTVDQVk.[D]   | C10(Carbamidomethyl); K23(iTRAQ4plex)    | 1 | 1 |
| [K].vYpGEQYTYmLLATEEQSPGEGDGNcVTR | N-Term(iTRAQ4plex); M10(Oxidation)       | 1 | 1 |
| [R].iYHSHIDAPk.[D]                | N-Term(iTRAQ4plex); K10(iTRAQ4plex)      | 1 | 1 |
| [R].iYHSHIDAPk.[D]                | K10(iTRAQ4plex)                          | 1 | 1 |
| [R].iYHSHIDAPk.[D]                | K10(iTRAQ4plex)                          | 1 | 1 |
| [R].iYHSHIDAPk.[D]                | N-Term(iTRAQ4plex); K10(iTRAQ4plex)      | 1 | 1 |

|                                     |                                     |   |   |
|-------------------------------------|-------------------------------------|---|---|
| [R].iYHSHIDAPk.[D]                  | N-Term(iTRAQ4plex); K10(iTRAQ4plex) | 1 | 1 |
| [R].iYHSHIDAPk.[D]                  | N-Term(iTRAQ4plex); K10(iTRAQ4plex) | 1 | 1 |
| [K].vDkDNEDFQESNR.[M]               | N-Term(iTRAQ4plex); K3(iTRAQ4plex)  | 1 | 1 |
| [K].dVDkEFYLFPTVFDENESLLEDNIR.[M]   | N-Term(iTRAQ4plex); K4(iTRAQ4plex)  | 1 | 1 |
| [K].dVDkEFYLFPTVFDENESLLEDNIR.[M]   | N-Term(iTRAQ4plex); K4(iTRAQ4plex)  | 1 | 1 |
| [R].iYHSHIDAPk.[D]                  | K10(iTRAQ4plex)                     | 1 | 1 |
| [K].aGLQAFFQVQEcNk.[S]              | N-Term(iTRAQ4plex); C12(Carbar)     | 1 | 1 |
| [K].aGLQAFFQVQEcNk.[S]              | N-Term(iTRAQ4plex); C12(Carbar)     | 1 | 1 |
| [R].gPEEEHLGILGPVIWAIEVGDITR.[V]    | N-Term(iTRAQ4plex)                  | 1 | 1 |
| [R].iYHSHIDAPk.[D]                  | K10(iTRAQ4plex)                     | 1 | 1 |
| [K].vDkDNEDFQESNR.[M]               | N-Term(iTRAQ4plex); K3(iTRAQ4plex)  | 1 | 1 |
| [K].hYYIGIIEETTWDYASDHGek.[K]       | N-Term(iTRAQ4plex); K20(iTRAQ4plex) | 1 | 1 |
| [K].hYYIGIIEETTWDYASDHGek.[K]       | N-Term(iTRAQ4plex); K20(iTRAQ4plex) | 1 | 1 |
| [K].hYYIGIIEETTWDYASDHGek.[K]       | N-Term(iTRAQ4plex); K20(iTRAQ4plex) | 1 | 1 |
| [K].hYYIGIIEETTWDYASDHGek.[K]       | N-Term(iTRAQ4plex); K20(iTRAQ4plex) | 1 | 1 |
| [K].hYYIGIIEETTWDYASDHGek.[K]       | N-Term(iTRAQ4plex); K20(iTRAQ4plex) | 1 | 1 |
| [K].hYYIGIIEETTWDYASDHGek.[K]       | N-Term(iTRAQ4plex); K20(iTRAQ4plex) | 1 | 1 |
| [R].tYYIAAVEVEWDYSPQR.[E]           | N-Term(iTRAQ4plex)                  | 1 | 1 |
| [R].tYYIAAVEVEWDYSPQR.[E]           | N-Term(iTRAQ4plex)                  | 1 | 1 |
| [K].vYPGEQTYMILLATEEQSPGEGDGNcVTR.  | N-Term(iTRAQ4plex); C26(Carbar)     | 1 | 1 |
| [K].vYPGEQTYMILLATEEQSPGEGDGNcVTR.  | N-Term(iTRAQ4plex); C26(Carbar)     | 1 | 1 |
| [K].vYPGEQTYMILLATEEQSPGEGDGNcVTR.  | N-Term(iTRAQ4plex); C26(Carbar)     | 1 | 1 |
| [K].eRGPEEEHLGILGPVIWAIEVGDITR.[V]  | N-Term(iTRAQ4plex)                  | 1 | 1 |
| [R].gPEEEHLGILGPVIWAIEVGDITR.[V]    | N-Term(iTRAQ4plex)                  | 1 | 1 |
| [R].qkDVDkEFYLFPTVFDENESLLEDNIR.[M] | N-Term(iTRAQ4plex); K2(iTRAQ4plex)  | 1 | 1 |
| [R].sVPPSASHVAPTETFTYEWVTPk.[E]     | N-Term(iTRAQ4plex); K23(iTRAQ4plex) | 1 | 1 |
| [R].sVPPSASHVAPTETFTYEWVTPk.[E]     | N-Term(iTRAQ4plex); K23(iTRAQ4plex) | 1 | 1 |
| [K].aLYLQYTDETFR.[T]                | N-Term(iTRAQ4plex)                  | 1 | 1 |
| [K].aLYLQYTDETFR.[T]                | N-Term(iTRAQ4plex)                  | 1 | 1 |
| [R].sVPPSASHVAPTETFTYEWVTPk.[E]     | N-Term(iTRAQ4plex); K23(iTRAQ4plex) | 1 | 1 |
| [R].sVPPSASHVAPTETFTYEWVTPk.[E]     | N-Term(iTRAQ4plex); K23(iTRAQ4plex) | 1 | 1 |
| [R].sVPPSASHVAPTETFTYEWVTPk.[E]     | N-Term(iTRAQ4plex); K23(iTRAQ4plex) | 1 | 1 |
| [K].gAYPLSIEPIGVR.[F]               | N-Term(iTRAQ4plex)                  | 1 | 1 |
| [K].aLYLQYTDETFR.[T]                | N-Term(iTRAQ4plex)                  | 1 | 1 |
| [R].sVPPSASHVAPTETFTYEWVTPk.[E]     | N-Term(iTRAQ4plex); K23(iTRAQ4plex) | 1 | 1 |
| [R].sVPPSASHVAPTETFTYEWVTPk.[E]     | N-Term(iTRAQ4plex); K23(iTRAQ4plex) | 1 | 1 |
| [R].sVPPSASHVAPTETFTYEWVTPk.[E]     | N-Term(iTRAQ4plex); K23(iTRAQ4plex) | 1 | 1 |
| [R].sVPPSASHVAPTETFTYEWVTPk.[E]     | N-Term(iTRAQ4plex); K23(iTRAQ4plex) | 1 | 1 |
| [K].gAYPLSIEPIGVR.[F]               | N-Term(iTRAQ4plex)                  | 1 | 1 |
| [K].dIFTGLIGPmk.[I]                 | N-Term(iTRAQ4plex); M10(Oxidation)  | 1 | 1 |
| [K].eVGPTNADPVcLAK.[M]              | N-Term(iTRAQ4plex); C11(Carbar)     | 1 | 1 |
| [K].eVGPTNADPVcLAK.[M]              | N-Term(iTRAQ4plex); C11(Carbar)     | 1 | 1 |
| [K].eVGPTNADPVcLAK.[M]              | N-Term(iTRAQ4plex); C11(Carbar)     | 1 | 1 |
| [K].dIFTGLIGPmk.[I]                 | N-Term(iTRAQ4plex); M10(Oxidation)  | 1 | 1 |
| [R].mFTTAPDQVDkeDEDFQESNk.[M]       | N-Term(iTRAQ4plex); K11(iTRAQ4plex) | 1 | 1 |
| [R].mFTTAPDQVDkeDEDFQESNk.[M]       | N-Term(iTRAQ4plex); K11(iTRAQ4plex) | 1 | 1 |
| [K].wYLFMGMEVDVHAFFHGQALTNk.[N]     | N-Term(iTRAQ4plex); K25(iTRAQ4plex) | 1 | 1 |
| [R].mFTTAPDQVDkeDEDFQESNk.[M]       | N-Term(iTRAQ4plex); K11(iTRAQ4plex) | 1 | 1 |
| [R].mFTTAPDQVDkeDEDFQESNk.[M]       | N-Term(iTRAQ4plex); K11(iTRAQ4plex) | 1 | 1 |
| [R].mFTTAPDQVDkeDEDFQESNk.[M]       | N-Term(iTRAQ4plex); K11(iTRAQ4plex) | 1 | 1 |
| [R].mFTTAPDQVDkeDEDFQESNk.[M]       | N-Term(iTRAQ4plex); K11(iTRAQ4plex) | 1 | 1 |
| [K].eVGPTNADPVcLAK.[M]              | N-Term(iTRAQ4plex); C11(Carbar)     | 1 | 1 |

|                                   |                                |   |   |
|-----------------------------------|--------------------------------|---|---|
| [R].eYTDASFTNR.[K]                | N-Term(iTRAQ4plex)             | 1 | 1 |
| [K].dIASGLIGPLIICK.[K]            | N-Term(iTRAQ4plex); C13(Carbar | 1 | 1 |
| [R].eYTDASFTNR.[K]                | N-Term(iTRAQ4plex)             | 1 | 1 |
| [K].dIASGLIGPLIICK.[K]            | N-Term(iTRAQ4plex); C13(Carbar | 1 | 1 |
| [R].eYTDASFTNR.[K]                | N-Term(iTRAQ4plex)             | 1 | 1 |
| [K].wYLFMGNEVDVHAAFFHGQALTNK.[N]  | N-Term(iTRAQ4plex); K25(iTRAQ  | 1 | 1 |
| [R].mFTTAPDQVDKEDEDFQESNK.[M]     | N-Term(iTRAQ4plex); M1(Oxidat  | 1 | 1 |
| [R].mFTTAPDQVDKEDEDFQESNK.[M]     | N-Term(iTRAQ4plex); M1(Oxidat  | 1 | 1 |
| [R].mFTTAPDQVDKEDEDFQESNK.[M]     | N-Term(iTRAQ4plex); M1(Oxidat  | 1 | 1 |
| [R].mFTTAPDQVDKEDEDFQESNK.[M]     | N-Term(iTRAQ4plex); M1(Oxidat  | 1 | 1 |
| [R].IYHSHIDAPK.[D]                | K10(iTRAQ4plex)                | 1 | 1 |
| [R].IYHSHIDAPK.[D]                | K10(iTRAQ4plex)                | 1 | 1 |
| [R].TTIEKPVWLGFLGPIIK.[A]         | K5(iTRAQ4plex); K17(iTRAQ4ple  | 1 | 1 |
| [R].tTIEKPVWLGFLGPIIK.[A]         | N-Term(iTRAQ4plex); K17(iTRAQ  | 1 | 1 |
| [K].KDSLDEK.[E]                   | N-Term(iTRAQ4plex); K1(iTRAQ4  | 1 | 1 |
| [R].TTIEKPVWLGFLGPIIK.[A]         | K5(iTRAQ4plex); K17(iTRAQ4ple  | 1 | 1 |
| [R].iYHSHIDAPK.[D]                | N-Term(iTRAQ4plex); K10(iTRAQ  | 1 | 1 |
| [R].tTIEKPVWLGFLGPIIK.[A]         | N-Term(iTRAQ4plex); K5(iTRAQ4  | 1 | 1 |
| [R].tTIEKPVWLGFLGPIIK.[A]         | N-Term(iTRAQ4plex); K5(iTRAQ4  | 1 | 1 |
| [R].tTIEKPVWLGFLGPIIK.[A]         | N-Term(iTRAQ4plex); K5(iTRAQ4  | 1 | 1 |
| [R].dTANLFPQTSLLHMQWPDTEGTFNVECLT | N-Term(iTRAQ4plex); C27(Carbar | 1 | 1 |
| [R].dTANLFPQTSLLHMQWPDTEGTFNVECLT | N-Term(iTRAQ4plex); C27(Carbar | 1 | 1 |
| [K].dIFTGLIGPMK.[I]               | N-Term(iTRAQ4plex); K11(iTRAQ  | 1 | 1 |
| [K].dIFTGLIGPMK.[I]               | N-Term(iTRAQ4plex); K11(iTRAQ  | 1 | 1 |
| [K].nNEGTYSPNYPQSR.[S]            | N-Term(iTRAQ4plex)             | 1 | 1 |
| [K].nNEGTYSPNYPQSR.[S]            | N-Term(iTRAQ4plex)             | 1 | 1 |
| [K].nNEGTYSPNYPQSR.[S]            | N-Term(iTRAQ4plex)             | 1 | 1 |
| [K].NNEGTYSPNYPQSR.[S]            |                                | 1 | 1 |
| [K].vNKDDEEFIESNK.[M]             | N-Term(iTRAQ4plex); K3(iTRAQ4  | 1 | 1 |
| [K].vNKDDEEFIESNK.[M]             | N-Term(iTRAQ4plex); K3(iTRAQ4  | 1 | 1 |
| [K].vNKDDEEFIESNK.[M]             | N-Term(iTRAQ4plex); K3(iTRAQ4  | 1 | 1 |
| [K].vNKDDEEFIESNK.[M]             | N-Term(iTRAQ4plex); K3(iTRAQ4  | 1 | 1 |
| [K].vNKDDEEFIESNK.[M]             | N-Term(iTRAQ4plex); K3(iTRAQ4  | 1 | 1 |
| [K].vNKDDEEFIESNK.[M]             | N-Term(iTRAQ4plex); K3(iTRAQ4  | 1 | 1 |
| [K].vNKDDEEFIESNK.[M]             | N-Term(iTRAQ4plex); K3(iTRAQ4  | 1 | 1 |
| [K].vNKDDEEFIESNK.[M]             | N-Term(iTRAQ4plex); K3(iTRAQ4  | 1 | 1 |
| [K].dIASGLIGPLIICK.[K]            | N-Term(iTRAQ4plex); C13(Carbar | 1 | 1 |
| [K].dIASGLIGPLIICK.[K]            | N-Term(iTRAQ4plex); C13(Carbar | 1 | 1 |
| [K].vNKDDEEFIESNK.[M]             | N-Term(iTRAQ4plex); K3(iTRAQ4  | 1 | 1 |
| [K].vNKDDEEFIESNK.[M]             | N-Term(iTRAQ4plex); K3(iTRAQ4  | 1 | 1 |
| [K].vNKDDEEFIESNK.[M]             | N-Term(iTRAQ4plex); K3(iTRAQ4  | 1 | 1 |
| [K].vNKDDEEFIESNK.[M]             | N-Term(iTRAQ4plex); K3(iTRAQ4  | 1 | 1 |
| [R].mFTTAPDQVDKEDEDFQESNK.[M]     | N-Term(iTRAQ4plex); M1(Oxidat  | 1 | 1 |
| [R].mFTTAPDQVDKEDEDFQESNK.[M]     | N-Term(iTRAQ4plex); M1(Oxidat  | 1 | 1 |
| [R].tPGIWLLHCHVTDHIHAGMETTYVLQNE  | N-Term(iTRAQ4plex); C9(Carbam  | 1 | 1 |
| [K].vNKDDEEFIESNK.[M]             | N-Term(iTRAQ4plex); K3(iTRAQ4  | 1 | 1 |
| [K].vNKDDEEFIESNK.[M]             | N-Term(iTRAQ4plex); K3(iTRAQ4  | 1 | 1 |
| [K].vNKDDEEFIESNK.[M]             | N-Term(iTRAQ4plex); K3(iTRAQ4  | 1 | 1 |
| [K].vNKDDEEFIESNK.[M]             | N-Term(iTRAQ4plex); K3(iTRAQ4  | 1 | 1 |
| [K].vNKDDEEFIESNK.[M]             | N-Term(iTRAQ4plex); K3(iTRAQ4  | 1 | 1 |
| [K].vNKDDEEFIESNK.[M]             | N-Term(iTRAQ4plex); K3(iTRAQ4  | 1 | 1 |
| [R].rQSEDSTFYLGGER.[T]            | N-Term(iTRAQ4plex)             | 1 | 1 |
| [K].wYLFMGNEVDVHAAFFHGQALTNK.[N]  | N-Term(iTRAQ4plex); K25(iTRAQ  | 1 | 1 |



|                                   |                                |   |   |
|-----------------------------------|--------------------------------|---|---|
| [K].vNkDDEEFIESNk.[M]             | N-Term(iTRAQ4plex); K3(iTRAQ4  | 1 | 1 |
| [K].vNkDDEEFIESNk.[M]             | N-Term(iTRAQ4plex); K3(iTRAQ4  | 1 | 1 |
| [K].vNkDDEEFIESNk.[M]             | N-Term(iTRAQ4plex); K3(iTRAQ4  | 1 | 1 |
| [R].rQSEDSTFYLGGER.[T]            | N-Term(iTRAQ4plex)             | 1 | 1 |
| [K].vNkDDEEFIESNk.[M]             | N-Term(iTRAQ4plex); K3(iTRAQ4  | 1 | 1 |
| [R].rQSEDSTFYLGGER.[T]            | N-Term(iTRAQ4plex)             | 1 | 1 |
| [K].vNkDDEEFIESNk.[M]             | N-Term(iTRAQ4plex); K3(iTRAQ4  | 1 | 1 |
| [K].vNkDDEEFIESNk.[M]             | N-Term(iTRAQ4plex); K3(iTRAQ4  | 1 | 1 |
| [K].vNkDDEEFIESNk.[M]             | N-Term(iTRAQ4plex); K3(iTRAQ4  | 1 | 1 |
| [R].rQSEDSTFYLGGER.[T]            | N-Term(iTRAQ4plex)             | 1 | 1 |
| [K].vNkDDEEFIESNk.[M]             | N-Term(iTRAQ4plex); K3(iTRAQ4  | 1 | 1 |
| [R].QSEDSTFYLGGER.[T]             |                                | 1 | 1 |
| [R].qSEDSTFYLGGER.[T]             | N-Term(iTRAQ4plex)             | 1 | 1 |
| [R].qSEDSTFYLGGER.[T]             | N-Term(iTRAQ4plex)             | 1 | 1 |
| [R].qSEDSTFYLGGER.[T]             | N-Term(iTRAQ4plex)             | 1 | 1 |
| [R].qSEDSTFYLGGER.[T]             | N-Term(iTRAQ4plex)             | 1 | 1 |
| [K].tYcSEPEk.[V]                  | N-Term(iTRAQ4plex); C3(Carbam  | 1 | 1 |
| [R].gVYSSDVFDIFPGTYQTLemFPR.[T]   | N-Term(iTRAQ4plex); M20(Oxida  | 1 | 1 |
| [K].mYSAVDPTk.[D]                 | N-Term(iTRAQ4plex); K10(iTRAQ  | 1 | 1 |
| [K].gEFYIGSk.[Y]                  | N-Term(iTRAQ4plex); K8(iTRAQ4  | 1 | 1 |
| [K].aEEEEHLGILGPQLHADVGdK.[V]     | N-Term(iTRAQ4plex); K20(iTRAQ  | 1 | 1 |
| [K].aEEEEHLGILGPQLHADVGdK.[V]     | N-Term(iTRAQ4plex); K20(iTRAQ  | 1 | 1 |
| [K].vDkDNEDFQESNR.[M]             | N-Term(iTRAQ4plex); K3(iTRAQ4  | 1 | 1 |
| [K].vDkDNEDFQESNR.[M]             | N-Term(iTRAQ4plex); K3(iTRAQ4  | 1 | 1 |
| [K].vDkDNEDFQESNR.[M]             | N-Term(iTRAQ4plex); K3(iTRAQ4  | 1 | 1 |
| [K].vDkDNEDFQESNR.[M]             | N-Term(iTRAQ4plex); K3(iTRAQ4  | 1 | 1 |
| [K].vDkDNEDFQESNR.[M]             | N-Term(iTRAQ4plex); K3(iTRAQ4  | 1 | 1 |
| [K].vDkDNEDFQESNR.[M]             | N-Term(iTRAQ4plex); K3(iTRAQ4  | 1 | 1 |
| [R].kAEEEEHLGILGPQLHADVGdK.[V]    | N-Term(iTRAQ4plex); K21(iTRAQ  | 1 | 1 |
| [K].dDEEFIESNk.[M]                | N-Term(iTRAQ4plex); K10(iTRAQ  | 1 | 1 |
| [R].kAEEEEHLGILGPQLHADVGdK.[V]    | K1(iTRAQ4plex); K21(iTRAQ4ple  | 1 | 1 |
| [R].kAEEEEHLGILGPQLHADVGdK.[V]    | N-Term(iTRAQ4plex); K1(iTRAQ4  | 1 | 1 |
| [R].kAEEEEHLGILGPQLHADVGdK.[V]    | N-Term(iTRAQ4plex); K1(iTRAQ4  | 1 | 1 |
| [R].iDTINLFPATLFDAYMVAQNPGEWMLScC | N-Term(iTRAQ4plex); C28(Carbar | 1 | 1 |
| [R].kAEEEEHLGILGPQLHADVGdK.[V]    | N-Term(iTRAQ4plex); K1(iTRAQ4  | 1 | 1 |
| [R].kAEEEEHLGILGPQLHADVGdK.[V]    | N-Term(iTRAQ4plex); K1(iTRAQ4  | 1 | 1 |
| [R].kAEEEEHLGILGPQLHADVGdK.[V]    | N-Term(iTRAQ4plex); K1(iTRAQ4  | 1 | 1 |
| [R].kAEEEEHLGILGPQLHADVGdK.[V]    | N-Term(iTRAQ4plex); K1(iTRAQ4  | 1 | 1 |
| [R].kAEEEEHLGILGPQLHADVGdK.[V]    | N-Term(iTRAQ4plex); K1(iTRAQ4  | 1 | 1 |
| [R].kAEEEEHLGILGPQLHADVGdK.[V]    | N-Term(iTRAQ4plex); K1(iTRAQ4  | 1 | 1 |
| [R].kAEEEEHLGILGPQLHADVGdK.[V]    | N-Term(iTRAQ4plex); K1(iTRAQ4  | 1 | 1 |
| [R].kAEEEEHLGILGPQLHADVGdK.[V]    | N-Term(iTRAQ4plex); K1(iTRAQ4  | 1 | 1 |
| [R].gVYSSDVFDIFPGTYQTLemFPR.[T]   | N-Term(iTRAQ4plex)             | 1 | 1 |
| [R].gVYSSDVFDIFPGTYQTLemFPR.[T]   | N-Term(iTRAQ4plex)             | 1 | 1 |
| [R].gVYSSDVFDIFPGTYQTLemFPR.[T]   | N-Term(iTRAQ4plex)             | 1 | 1 |
| [R].hYYIAAEEIWNYPAGSIDIFTk.[E]    | N-Term(iTRAQ4plex); K23(iTRAQ  | 1 | 1 |
| [K].VNkDDEEFIESNk.[M]             | K3(iTRAQ4plex); K13(iTRAQ4ple  | 1 | 1 |
| [K].vNkDDEEFIESNk.[M]             | N-Term(iTRAQ4plex); K13(iTRAQ  | 1 | 1 |
| [K].VNkDDEEFIESNk.[M]             | K3(iTRAQ4plex); K13(iTRAQ4ple  | 1 | 1 |
| [K].dLYSGLIGPLIVcR.[R]            | N-Term(iTRAQ4plex); C13(Carbar | 1 | 1 |
| [R].hYYIAAEEIWNYPAGSIDIFTk.[E]    | N-Term(iTRAQ4plex); K23(iTRAQ  | 1 | 1 |

|                                   |                                |   |   |
|-----------------------------------|--------------------------------|---|---|
| [K].aGLQAFFQVQEcNk.[S]            | N-Term(iTRAQ4plex); C12(Carbar | 1 | 1 |
| [K].aGLQAFFQVQEcNk.[S]            | N-Term(iTRAQ4plex); C12(Carbar | 1 | 1 |
| [K].mYSAVDPTk.[D]                 | N-Term(iTRAQ4plex); M1(Oxidati | 1 | 1 |
| [K].DIASGLIGPLIIck.[K]            | C13(Carbamidomethyl); K14(iTR  | 1 | 1 |
| [K].gEFYIGSk.[Y]                  | N-Term(iTRAQ4plex); K8(iTRAQ4  | 1 | 1 |
| [R].kAEEEEHLGILGPQLHADVGDk.[V]    | N-Term(iTRAQ4plex); K1(iTRAQ4  | 1 | 1 |
| [R].tPGIWLLHcHVTDHIHAGMETTYTVLQNE | N-Term(iTRAQ4plex); C9(Carbam  | 1 | 1 |
| [K].vDKDNEDFQESNR.[M]             | N-Term(iTRAQ4plex); K3(iTRAQ4  | 1 | 1 |
| [K].vNkDDEEFIESNk.[M]             | K3(iTRAQ4plex); K13(iTRAQ4ple  | 1 | 1 |
| [R].MFTTAPDQVDKEDEDFQESNk.[M]     | K11(iTRAQ4plex); K21(iTRAQ4pl  | 1 | 1 |
| [R].sVPPSASHVAPTETFTYEWVTPk.[E]   | N-Term(iTRAQ4plex); K23(iTRAQ  | 1 | 1 |
| [K].vDKDNEDFQESNR.[M]             | K3(iTRAQ4plex)                 | 1 | 1 |
| [R].eYTDASFTNR.[K]                | N-Term(iTRAQ4plex)             | 1 | 1 |
| [K].vDKDNEDFQESNR.[M]             | N-Term(iTRAQ4plex); K3(iTRAQ4  | 1 | 1 |
| [K].vDKDNEDFQESNR.[M]             | N-Term(iTRAQ4plex); K3(iTRAQ4  | 1 | 1 |
| [R].EYTDASFTNR.[K]                |                                | 1 | 1 |
| [K].vNkDDEEFIESNk.[M]             | N-Term(iTRAQ4plex); K13(iTRAQ  | 1 | 1 |
| [K].DIASGLIGPLIIck.[K]            | N-Term(iTRAQ4plex); C13(Carbar | 1 | 1 |
| [K].dNEDFQESNR.[M]                | N-Term(iTRAQ4plex)             | 1 | 1 |
| [K].EVGPTNADPVcLak.[M]            | C11(Carbamidomethyl); K14(iTR  | 1 | 1 |
| [R].qSEDSTFYLGGER.[T]             | N-Term(iTRAQ4plex)             | 1 | 1 |
| [R].kAEEEEHLGILGPQLHADVGDk.[V]    | N-Term(iTRAQ4plex); K1(iTRAQ4  | 1 | 1 |
| [K].tYSDHPEk.[V]                  | N-Term(iTRAQ4plex); K8(iTRAQ4  | 1 | 1 |
| [K].gEFYIGSk.[Y]                  | N-Term(iTRAQ4plex); K8(iTRAQ4  | 1 | 1 |
| [K].aLYLQYTDETFR.[T]              | N-Term(iTRAQ4plex)             | 1 | 1 |
| [K].mYSAVDPTk.[D]                 | N-Term(iTRAQ4plex); K10(iTRAQ  | 1 | 1 |
| [K].gAYPLSIEPIGVR.[F]             | N-Term(iTRAQ4plex)             | 1 | 1 |
| [R].QSEDSTFYLGGER.[T]             |                                | 1 | 1 |
| [K].mYSAVDPTk.[D]                 | N-Term(iTRAQ4plex); M1(Oxidati | 1 | 1 |
| [K].aLYLQYTDETFR.[T]              | N-Term(iTRAQ4plex)             | 1 | 1 |
| [R].rPYLkVFNPR.[R]                | N-Term(iTRAQ4plex); K5(iTRAQ4  | 1 | 1 |
| [K].tYSDHPEk.[V]                  | N-Term(iTRAQ4plex); K8(iTRAQ4  | 1 | 1 |
| [R].mFTTAPDQVDKEDEDFQESNk.[M]     | N-Term(iTRAQ4plex); M1(Oxidati | 1 | 1 |
| [R].EYTDASFTNR.[K]                |                                | 1 | 1 |
| [K].gEFYIGSk.[Y]                  | N-Term(iTRAQ4plex); K8(iTRAQ4  | 1 | 1 |
| [R].QYTDSTFR.[V]                  |                                | 1 | 1 |
| [R].sVPPSASHVAPTETFTYEWVTPk.[E]   | N-Term(iTRAQ4plex); K23(iTRAQ  | 1 | 1 |
| [K].vDKDNEDFQESNR.[M]             | N-Term(iTRAQ4plex); K3(iTRAQ4  | 1 | 1 |
| [R].qSEDSTFYLGGER.[T]             | N-Term(iTRAQ4plex)             | 1 | 1 |
| [K].dIFTGLIGPMk.[I]               | N-Term(iTRAQ4plex); K11(iTRAQ  | 1 | 1 |
| [R].iYHSHIDAPk.[D]                | N-Term(iTRAQ4plex); K10(iTRAQ  | 1 | 1 |
| [K].dIFTGLIGPMk.[I]               | N-Term(iTRAQ4plex); M10(Oxida  | 1 | 1 |
| [R].eYTDASFTNR.[K]                | N-Term(iTRAQ4plex)             | 1 | 1 |
| [R].eYTDASFTNR.[K]                | N-Term(iTRAQ4plex)             | 1 | 1 |
| [K].vNkDDEEFIESNk.[M]             | N-Term(iTRAQ4plex); K3(iTRAQ4  | 1 | 1 |
| [K].mYSAVDPTk.[D]                 | N-Term(iTRAQ4plex); K10(iTRAQ  | 1 | 1 |
| [K].vNkDDEEFIESNk.[M]             | N-Term(iTRAQ4plex); K3(iTRAQ4  | 1 | 1 |
| [K].tYcSEPEk.[V]                  | N-Term(iTRAQ4plex); C3(Carbam  | 1 | 1 |
| [R].eYTDASFTNR.[K]                | N-Term(iTRAQ4plex)             | 1 | 1 |
| [K].vNkDDEEFIESNk.[M]             | N-Term(iTRAQ4plex); K3(iTRAQ4  | 1 | 1 |
| [R].kAEEEEHLGILGPQLHADVGDk.[V]    | N-Term(iTRAQ4plex); K1(iTRAQ4  | 1 | 1 |
| [R].iYHSHIDAPk.[D]                | N-Term(iTRAQ4plex); K10(iTRAQ  | 1 | 1 |

|                                    |                                     |   |   |
|------------------------------------|-------------------------------------|---|---|
| [K].mYSAVDPTk.[D]                  | N-Term(iTRAQ4plex); K10(iTRAQ4plex) | 1 | 1 |
| [K].vNkDDEEFIESNk.[M]              | K3(iTRAQ4plex); K13(iTRAQ4plex)     | 1 | 1 |
| [R].kAEEEEHLGILGPQLHADVGDk.[V]     | N-Term(iTRAQ4plex); K1(iTRAQ4plex)  | 1 | 1 |
| [R].mFTTAPDQVDKEDEDFQESNk.[M]      | N-Term(iTRAQ4plex); K11(iTRAQ4plex) | 1 | 1 |
| [K].vNkDDEEFIESNk.[M]              | N-Term(iTRAQ4plex); K13(iTRAQ4plex) | 1 | 1 |
| [K].eVGPTNADPVcLAK.[M]             | N-Term(iTRAQ4plex); C11(Carbamid)   | 1 | 1 |
| [K].vNkDDEEFIESNk.[M]              | K3(iTRAQ4plex); K13(iTRAQ4plex)     | 1 | 1 |
| [R].eYTDASFTNR.[K]                 | N-Term(iTRAQ4plex)                  | 1 | 1 |
| [K].dNEDFQESNR.[M]                 | N-Term(iTRAQ4plex)                  | 1 | 1 |
| [R].svPPSASHVAPTETFTYEWTVPk.[E]    | N-Term(iTRAQ4plex); K23(iTRAQ4plex) | 1 | 1 |
| [R].sGAGTEDSACIPWAYYSTVDQVk.[D]    | N-Term(iTRAQ4plex); C10(Carbamid)   | 1 | 1 |
| [K].eVGPTNADPVcLAK.[M]             | N-Term(iTRAQ4plex); C11(Carbamid)   | 1 | 1 |
| [R].svPPSASHVAPTETFTYEWTVPk.[E]    | N-Term(iTRAQ4plex); K23(iTRAQ4plex) | 1 | 1 |
| [K].gEFYIGSk.[Y]                   | N-Term(iTRAQ4plex); K8(iTRAQ4plex)  | 1 | 1 |
| [K].dDEEFIESNk.[M]                 | N-Term(iTRAQ4plex); K10(iTRAQ4plex) | 1 | 1 |
| [K].vNkDDEEFIESNk.[M]              | N-Term(iTRAQ4plex); K3(iTRAQ4plex)  | 1 | 1 |
| [K].tYSDHPEk.[V]                   | N-Term(iTRAQ4plex); K8(iTRAQ4plex)  | 1 | 1 |
| [R].kAEEEEHLGILGPQLHADVGDk.[V]     | N-Term(iTRAQ4plex); K1(iTRAQ4plex)  | 1 | 1 |
| [K].vNkDDEEFIESNk.[M]              | N-Term(iTRAQ4plex); K3(iTRAQ4plex)  | 1 | 1 |
| [K].tYSDHPEk.[V]                   | N-Term(iTRAQ4plex); K8(iTRAQ4plex)  | 1 | 1 |
| [R].QYTDSTFR.[V]                   |                                     | 1 | 1 |
| [K].vNkDDEEFIESNk.[M]              | N-Term(iTRAQ4plex); K3(iTRAQ4plex)  | 1 | 1 |
| [R].QYTDSTFR.[V]                   |                                     | 1 | 1 |
| [K].dNEDFQESNR.[M]                 | N-Term(iTRAQ4plex)                  | 1 | 1 |
| [K].gEFYIGSk.[Y]                   | N-Term(iTRAQ4plex); K8(iTRAQ4plex)  | 1 | 1 |
| [K].tYcSEPEk.[V]                   | N-Term(iTRAQ4plex); C3(Carbamid)    | 1 | 1 |
| [K].GAYPLSIEPIGVR.[F]              |                                     | 1 | 1 |
| [K].tYSDHPEk.[V]                   | N-Term(iTRAQ4plex); K8(iTRAQ4plex)  | 1 | 1 |
| [K].dIFTGLIGPmk.[I]                | N-Term(iTRAQ4plex); M10(Oxidation)  | 1 | 1 |
| [K].vNkDDEEFIESNk.[M]              | N-Term(iTRAQ4plex); K3(iTRAQ4plex)  | 1 | 1 |
| [K].vDkDNEDFQESNR.[M]              | N-Term(iTRAQ4plex); K3(iTRAQ4plex)  | 1 | 1 |
| [R].QSEDSTFYLGGER.[T]              |                                     | 1 | 1 |
| [R].qSEDSTFYLGGER.[T]              | N-Term(iTRAQ4plex)                  | 1 | 1 |
| [K].vNkDDEEFIESNk.[M]              | N-Term(iTRAQ4plex); K3(iTRAQ4plex)  | 1 | 1 |
| [R].qSEDSTFYLGGER.[T]              | N-Term(iTRAQ4plex)                  | 1 | 1 |
| [K].GAYPLSIEPIGVR.[F]              |                                     | 1 | 1 |
| [K].vDkDNEDFQESNR.[M]              | N-Term(iTRAQ4plex); K3(iTRAQ4plex)  | 1 | 1 |
| [R].svPPSASHVAPTETFTYEWTVPk.[E]    | N-Term(iTRAQ4plex); K23(iTRAQ4plex) | 1 | 1 |
| [K].tYSDHPEk.[V]                   | N-Term(iTRAQ4plex); K8(iTRAQ4plex)  | 1 | 1 |
| [R].svPPSASHVAPTETFTYEWTVPk.[E]    | N-Term(iTRAQ4plex); K23(iTRAQ4plex) | 1 | 1 |
| [K].dDEEFIESNk.[M]                 | N-Term(iTRAQ4plex); K10(iTRAQ4plex) | 1 | 1 |
| [K].wYLFMGMGNEVDVHAAFFHGQALTNk.[N] | N-Term(iTRAQ4plex); K25(iTRAQ4plex) | 1 | 1 |
| [K].mYSAVDPTk.[D]                  | N-Term(iTRAQ4plex); M1(Oxidation)   | 1 | 1 |
| [R].eYTDASFTNR.[K]                 | N-Term(iTRAQ4plex)                  | 1 | 1 |
| [R].IYHSHIDAPk.[D]                 | K10(iTRAQ4plex)                     | 1 | 1 |
| [R].rQSEDSTFYLGGER.[T]             | N-Term(iTRAQ4plex)                  | 1 | 1 |
| [K].mYSAVDPTk.[D]                  | N-Term(iTRAQ4plex); K10(iTRAQ4plex) | 1 | 1 |
| [R].kLYDYcDVPQcAAPSFDcGkPQVEPk.[K] | N-Term(iTRAQ4plex); K1(iTRAQ4plex)  | 1 | 1 |
| [R].kLYDYcDVPQcAAPSFDcGkPQVEPk.[K] | N-Term(iTRAQ4plex); K1(iTRAQ4plex)  | 1 | 1 |
| [R].kLYDYcDVPQcAAPSFDcGkPQVEPk.[K] | N-Term(iTRAQ4plex); K1(iTRAQ4plex)  | 1 | 1 |
| [R].kLYDYcDVPQcAAPSFDcGkPQVEPk.[K] | N-Term(iTRAQ4plex); K1(iTRAQ4plex)  | 1 | 1 |
| [R].vQSTELcAGHLAGGTDSQGDSSGGPLVcF  | N-Term(iTRAQ4plex); C7(Carbamid)    | 1 | 1 |

|                                   |                                |   |   |
|-----------------------------------|--------------------------------|---|---|
| [R].vQSTELcAGHLAGGTDScQGDSGGPLVcF | N-Term(iTRAQ4plex); C7(Carbam  | 1 | 1 |
| [K].IYDYcDVPQcAAPSFDcGkPQVEPk.[K] | N-Term(iTRAQ4plex); C5(Carbam  | 1 | 1 |
| [K].IYDYcDVPQcAAPSFDcGkPQVEPk.[K] | N-Term(iTRAQ4plex); C5(Carbam  | 1 | 1 |
| [K].IYDYcDVPQcAAPSFDcGkPQVEPk.[K] | N-Term(iTRAQ4plex); C5(Carbam  | 1 | 1 |
| [K].IYDYcDVPQcAAPSFDcGkPQVEPk.[K] | N-Term(iTRAQ4plex); C5(Carbam  | 1 | 1 |
| [R].vQSTELcAGHLAGGTDScQGDSGGPLVcF | N-Term(iTRAQ4plex); C7(Carbam  | 1 | 1 |
| [K].rWELcDIPR.[C]                 | N-Term(iTRAQ4plex); C5(Carbam  | 1 | 1 |
| [K].rWELcDIPR.[C]                 | N-Term(iTRAQ4plex); C5(Carbam  | 1 | 1 |
| [K].kcQSWSSMTPHR.[H]              | N-Term(iTRAQ4plex); K1(iTRAQ4  | 1 | 1 |
| [K].wSSTSPHRPR.[F]                | N-Term(iTRAQ4plex)             | 1 | 1 |
| [K].cQSWSSmTPHR.[H]               | N-Term(iTRAQ4plex); C1(Carbam  | 1 | 1 |
| [R].hSIFTPETNPR.[A]               | N-Term(iTRAQ4plex)             | 1 | 1 |
| [K].cQSWSSMTPHR.[H]               | N-Term(iTRAQ4plex); C1(Carbam  | 1 | 1 |
| [R].hSIFTPETNPR.[A]               | N-Term(iTRAQ4plex)             | 1 | 1 |
| [K].cQSWSSMTPHR.[H]               | N-Term(iTRAQ4plex); C1(Carbam  | 1 | 1 |
| [R].hSIFTPETNPR.[A]               | N-Term(iTRAQ4plex)             | 1 | 1 |
| [R].hSIFTPETNPR.[A]               | N-Term(iTRAQ4plex)             | 1 | 1 |
| [K].kVYLSEck.[T]                  | N-Term(iTRAQ4plex); K1(iTRAQ4  | 1 | 1 |
| [R].eLRPWcFTTDPNkR.[W]            | N-Term(iTRAQ4plex); C6(Carbam  | 1 | 1 |
| [R].eLRPWcFTTDPNkR.[W]            | N-Term(iTRAQ4plex); C6(Carbam  | 1 | 1 |
| [K].vIPAcLPSPNYVVADR.[T]          | N-Term(iTRAQ4plex); C5(Carbam  | 1 | 1 |
| [K].vIPAcLPSPNYVVADR.[T]          | N-Term(iTRAQ4plex); C5(Carbam  | 1 | 1 |
| [K].tMSGLEcQAWDSQSPHAHGYPsk.[F]   | N-Term(iTRAQ4plex); C7(Carbam  | 1 | 1 |
| [K].vILGAHQEVNLEPHVQIEVSR.[L]     | N-Term(iTRAQ4plex)             | 1 | 1 |
| [K].vILGAHQEVNLEPHVQIEVSR.[L]     | N-Term(iTRAQ4plex)             | 1 | 1 |
| [K].vILGAHQEVNLEPHVQIEVSR.[L]     | N-Term(iTRAQ4plex)             | 1 | 1 |
| [K].vILGAHQEVNLEPHVQIEVSR.[L]     | N-Term(iTRAQ4plex)             | 1 | 1 |
| [K].gPWcFTTDPsvR.[W]              | N-Term(iTRAQ4plex); C4(Carbam  | 1 | 1 |
| [K].vILGAHQEVNLEPHVQIEVSR.[L]     | N-Term(iTRAQ4plex)             | 1 | 1 |
| [R].eLRPWcFTTDPNk.[R]             | N-Term(iTRAQ4plex); C6(Carbam  | 1 | 1 |
| [R].TEcFITGWGETQGTFGAGLLk.[E]     | C3(Carbamidomethyl); K21(iTRA  | 1 | 1 |
| [R].tEcFITGWGETQGTFGAGLLk.[E]     | N-Term(iTRAQ4plex); C3(Carbam  | 1 | 1 |
| [R].fGmHFcGGTLISPEWVLTAAhcLEk.[S] | N-Term(iTRAQ4plex); M3(Oxidati | 1 | 1 |
| [K].eQQcVImAENR.[K]               | N-Term(iTRAQ4plex); C4(Carbam  | 1 | 2 |
| [R].nPDNDPQGPWcYTTDPEk.[R]        | N-Term(iTRAQ4plex); C11(Carbar | 1 | 1 |
| [K].eQQcVImAENR.[K]               | N-Term(iTRAQ4plex); C4(Carbam  | 1 | 2 |
| [K].eQQcVImAENR.[K]               | N-Term(iTRAQ4plex); C4(Carbam  | 1 | 2 |
| [R].nPDNDPQGPWcYTTDPEk.[R]        | N-Term(iTRAQ4plex); C11(Carbar | 1 | 1 |
| [K].eQQcVImAENR.[K]               | N-Term(iTRAQ4plex); C4(Carbam  | 1 | 2 |
| [K].eQQcVImAENR.[K]               | N-Term(iTRAQ4plex); C4(Carbam  | 1 | 2 |
| [K].EAQLPVIENk.[V]                | K10(iTRAQ4plex)                | 1 | 1 |
| [K].eQQcVImAENR.[K]               | N-Term(iTRAQ4plex); C4(Carbam  | 1 | 2 |
| [R].nPDNDPQGPWcYTTDPEkR.[Y]       | N-Term(iTRAQ4plex); C11(Carbar | 1 | 1 |
| [R].tEcFITGWGETQGTFGAGLLk.[E]     | N-Term(iTRAQ4plex); C3(Carbam  | 1 | 1 |
| [R].nPDNDPQGPWcYTTDPEkR.[Y]       | N-Term(iTRAQ4plex); C11(Carbar | 1 | 1 |
| [R].fVTWIEGVMR.[N]                | N-Term(iTRAQ4plex)             | 1 | 1 |
| [K].eAQLPVIENk.[V]                | N-Term(iTRAQ4plex); K10(iTRAQ  | 1 | 1 |
| [K].eAQLPVIENk.[V]                | N-Term(iTRAQ4plex); K10(iTRAQ  | 1 | 1 |
| [K].kVYLSEck.[T]                  | N-Term(iTRAQ4plex); K1(iTRAQ4  | 1 | 1 |
| [R].fGMHFcGGTLISPEWVLTAAhcLEk.[S] | N-Term(iTRAQ4plex); C6(Carbam  | 1 | 1 |
| [R].fGMHFcGGTLISPEWVLTAAhcLEk.[S] | N-Term(iTRAQ4plex); C6(Carbam  | 1 | 1 |
| [R].tEcFITGWGETQGTFGAGLLk.[E]     | N-Term(iTRAQ4plex); C3(Carbam  | 1 | 1 |

|                                |                                |   |   |
|--------------------------------|--------------------------------|---|---|
| [R].tEcFITGWGETQGTFGAGLLk.[E]  | N-Term(iTRAQ4plex); C3(Carbam  | 1 | 1 |
| [K].QLGAGSIEEcAAk.[C]          | C10(Carbamidomethyl); K13(iTR  | 1 | 1 |
| [K].qLGAGSIEEcAAk.[C]          | N-Term(iTRAQ4plex); C10(Carbar | 1 | 1 |
| [K].qLGAGSIEEcAAk.[C]          | N-Term(iTRAQ4plex); C10(Carbar | 1 | 1 |
| [K].qLGAGSIEEcAAk.[C]          | N-Term(iTRAQ4plex); C10(Carbar | 1 | 1 |
| [R].NPDNDPQGPWcYTTDPEk.[R]     | C11(Carbamidomethyl); K18(iTR  | 1 | 1 |
| [K].ISSPAVITDk.[V]             | N-Term(iTRAQ4plex); K10(iTRAQ  | 1 | 1 |
| [R].nPDGDVGGPWcYTTNPR.[K]      | N-Term(iTRAQ4plex); C11(Carbar | 1 | 1 |
| [R].nPDGDVGGPWcYTTNPR.[K]      | N-Term(iTRAQ4plex); C11(Carbar | 1 | 1 |
| [R].nPDGDVGGPWcYTTNPR.[K]      | N-Term(iTRAQ4plex); C11(Carbar | 1 | 1 |
| [R].cTTPPPSSGPTYQcLk.[G]       | N-Term(iTRAQ4plex); C1(Carbam  | 1 | 1 |
| [R].fSPATHPSEGLEENYcR.[N]      | N-Term(iTRAQ4plex); C16(Carbar | 1 | 1 |
| [R].aTTVTGTPcQDWAQEPHR.[H]     | N-Term(iTRAQ4plex); C9(Carbam  | 1 | 1 |
| [R].fSPATHPSEGLEENYcR.[N]      | N-Term(iTRAQ4plex); C16(Carbar | 1 | 1 |
| [R].aTTVTGTPcQDWAQEPHR.[H]     | N-Term(iTRAQ4plex); C9(Carbam  | 1 | 1 |
| [R].aTTVTGTPcQDWAQEPHR.[H]     | N-Term(iTRAQ4plex); C9(Carbam  | 1 | 1 |
| [R].gTSSTTTTgk.[K]             | N-Term(iTRAQ4plex); K10(iTRAQ  | 1 | 1 |
| [K].cEEDEEFTcR.[A]             | N-Term(iTRAQ4plex); C1(Carbam  | 1 | 1 |
| [K].eAQLPVIENk.[V]             | N-Term(iTRAQ4plex); K10(iTRAQ  | 1 | 1 |
| [R].vVGGcVAHPHSWPWQVSLR.[T]    | N-Term(iTRAQ4plex); C5(Carbam  | 1 | 1 |
| [R].vVGGcVAHPHSWPWQVSLR.[T]    | N-Term(iTRAQ4plex); C5(Carbam  | 1 | 1 |
| [R].vVGGcVAHPHSWPWQVSLR.[T]    | N-Term(iTRAQ4plex); C5(Carbam  | 1 | 1 |
| [K].cEEDEEFTcR.[A]             | N-Term(iTRAQ4plex); C1(Carbam  | 1 | 1 |
| [R].nPDADkGPWcFTTDPSVR.[W]     | N-Term(iTRAQ4plex); K6(iTRAQ4  | 1 | 1 |
| [K].kQLGAGSIEEcAAk.[C]         | N-Term(iTRAQ4plex); K1(iTRAQ4  | 1 | 1 |
| [K].LSSPAVITDK.[V]             | K10(iTRAQ4plex)                | 1 | 1 |
| [R].cTTPPPSSGPTYQcLk.[G]       | N-Term(iTRAQ4plex); C1(Carbam  | 1 | 1 |
| [K].cEEDEEFTcR.[A]             | N-Term(iTRAQ4plex); C1(Carbam  | 1 | 1 |
| [R].aPWcHTTNSQVR.[W]           | N-Term(iTRAQ4plex); C4(Carbam  | 1 | 1 |
| [R].aPWcHTTNSQVR.[W]           | N-Term(iTRAQ4plex); C4(Carbam  | 1 | 1 |
| [R].WEYcNLk.[K]                | C4(Carbamidomethyl); K7(iTRAC  | 1 | 1 |
| [K].rAPWcHTTNSQVR.[W]          | N-Term(iTRAQ4plex); C5(Carbam  | 1 | 1 |
| [R].wELcDIPR.[C]               | N-Term(iTRAQ4plex); C4(Carbam  | 1 | 1 |
| [K].vILGAHQEVNLEPHVQEIEVSR.[L] | N-Term(iTRAQ4plex)             | 1 | 1 |
| [K].eQQcVImAENR.[K]            | N-Term(iTRAQ4plex); C4(Carbam  | 1 | 2 |
| [R].aFQYHsk.[E]                | N-Term(iTRAQ4plex); K7(iTRAQ4  | 1 | 3 |
| [K].RAPWcHTTNSQVR.[W]          | C5(Carbamidomethyl)            | 1 | 1 |
| [K].EQQcVIMAENR.[K]            | C4(Carbamidomethyl)            | 1 | 2 |
| [R].wELcDIPR.[C]               | N-Term(iTRAQ4plex); C4(Carbam  | 1 | 1 |
| [R].tEcFITGWGETQGTFGAGLLk.[E]  | N-Term(iTRAQ4plex); C3(Carbam  | 1 | 1 |
| [K].ISSPAVITDk.[V]             | N-Term(iTRAQ4plex); K10(iTRAQ  | 1 | 1 |
| [K].nLDENYcR.[N]               | N-Term(iTRAQ4plex); C7(Carbam  | 1 | 1 |
| [K].nLDENYcR.[N]               | N-Term(iTRAQ4plex); C7(Carbam  | 1 | 1 |
| [R].mRDVVLFEk.[-K]             | N-Term(iTRAQ4plex); K9(iTRAQ4  | 1 | 2 |
| [R].vVGGcVAHPHSWPWQVSLR.[T]    | N-Term(iTRAQ4plex); C5(Carbam  | 1 | 1 |
| [R].kDIALLk.[L]                | N-Term(iTRAQ4plex); K1(iTRAQ4  | 1 | 1 |
| [R].tPENFPck.[N]               | N-Term(iTRAQ4plex); C7(Carbam  | 1 | 1 |
| [R].vVGGcVAHPHSWPWQVSLR.[T]    | N-Term(iTRAQ4plex); C5(Carbam  | 1 | 1 |
| [K].nLDENYcR.[N]               | N-Term(iTRAQ4plex); C7(Carbam  | 1 | 1 |
| [R].aFQYHsk.[E]                | N-Term(iTRAQ4plex); K7(iTRAQ4  | 1 | 3 |
| [R].aPWcHTTNSQVR.[W]           | N-Term(iTRAQ4plex); C4(Carbam  | 1 | 1 |
| [K].rAPWcHTTNSQVR.[W]          | N-Term(iTRAQ4plex); C5(Carbam  | 1 | 1 |

|                                 |                                |   |   |
|---------------------------------|--------------------------------|---|---|
| [R].hSIFTPETNPR.[A]             | N-Term(iTRAQ4plex)             | 1 | 1 |
| [R].hSIFTPETNPR.[A]             | N-Term(iTRAQ4plex)             | 1 | 1 |
| [R].nPDNDPQGPWcYTTDPEk.[R]      | N-Term(iTRAQ4plex); C11(Carbam | 1 | 1 |
| [R].wELcDIPR.[C]                | N-Term(iTRAQ4plex); C4(Carbam  | 1 | 1 |
| [R].NPDNDPQGPWcYTTDPEk.[R]      | C11(Carbamidomethyl); K18(iTR  | 1 | 1 |
| [K].nLDENYcR.[N]                | N-Term(iTRAQ4plex); C7(Carbam  | 1 | 1 |
| [R].nPDNDPQGPWcYTTDPEk.[R]      | N-Term(iTRAQ4plex); C11(Carbam | 1 | 1 |
| [K].cEEDEEFTcR.[A]              | N-Term(iTRAQ4plex); C1(Carbam  | 1 | 1 |
| [R].wEYcNLk.[K]                 | N-Term(iTRAQ4plex); C4(Carbam  | 1 | 1 |
| [R].hSIFTPETNPR.[A]             | N-Term(iTRAQ4plex)             | 1 | 1 |
| [K].cEEDEEFTcR.[A]              | N-Term(iTRAQ4plex); C1(Carbam  | 1 | 1 |
| [K].QLGAGSIEEcAAk.[C]           | C10(Carbamidomethyl); K13(iTR  | 1 | 1 |
| [R].dVVLFEk.[-K]                | N-Term(iTRAQ4plex); K7(iTRAQ4  | 1 | 2 |
| [K].cEEDEEFTcR.[A]              | C1(Carbamidomethyl); C9(Carba  | 1 | 1 |
| [K].kcQSWSSMTPHR.[H]            | N-Term(iTRAQ4plex); K1(iTRAQ4  | 1 | 1 |
| [R].dVVLFEk.[-K]                | N-Term(iTRAQ4plex); K7(iTRAQ4  | 1 | 2 |
| [R].aFQYHsk.[E]                 | N-Term(iTRAQ4plex); K7(iTRAQ4  | 1 | 3 |
| [R].aPWcHTTNSQVR.[W]            | N-Term(iTRAQ4plex); C4(Carbam  | 1 | 1 |
| [K].eAQLPVIENk.[V]              | N-Term(iTRAQ4plex); K10(iTRAQ  | 1 | 1 |
| [R].wELcDIPR.[C]                | N-Term(iTRAQ4plex); C4(Carbam  | 1 | 1 |
| [K].EQQcVIMAENR.[K]             | C4(Carbamidomethyl)            | 1 | 2 |
| [R].nPDNDPQGPWcYTTDPEkR.[Y]     | N-Term(iTRAQ4plex); C11(Carbam | 1 | 1 |
| [K].nLDENYcR.[N]                | N-Term(iTRAQ4plex); C7(Carbam  | 1 | 1 |
| [K].rWELcDIPR.[C]               | N-Term(iTRAQ4plex); C5(Carbam  | 1 | 1 |
| [R].wEYcNLk.[K]                 | N-Term(iTRAQ4plex); C4(Carbam  | 1 | 1 |
| [K].nGITcQk.[W]                 | N-Term(iTRAQ4plex); C5(Carbam  | 1 | 1 |
| [K].eQQcVImAENR.[K]             | N-Term(iTRAQ4plex); C4(Carbam  | 1 | 2 |
| [K].NLDENYcR.[N]                | C7(Carbamidomethyl)            | 1 | 1 |
| [R].HSIFTPETNPR.[A]             |                                | 1 | 1 |
| [R].aFQYHsk.[E]                 | N-Term(iTRAQ4plex); K7(iTRAQ4  | 1 | 3 |
| [K].wsSTSPHRPR.[F]              | N-Term(iTRAQ4plex)             | 1 | 1 |
| [R].fVTWIEGVMR.[N]              | N-Term(iTRAQ4plex)             | 1 | 1 |
| [R].eLRPWcFTTDPnk.[R]           | N-Term(iTRAQ4plex); C6(Carbam  | 1 | 1 |
| [R].nPDNDPQGPWcYTTDPEk.[R]      | N-Term(iTRAQ4plex); C11(Carbam | 1 | 1 |
| [K].eQQcVImAENR.[K]             | N-Term(iTRAQ4plex); C4(Carbam  | 1 | 2 |
| [R].VVGgcVAHPHWPWQVSLR.[T]      | C5(Carbamidomethyl)            | 1 | 1 |
| [R].hSIFTPETNPR.[A]             | N-Term(iTRAQ4plex)             | 1 | 1 |
| [R].IFLEPTRk.[D]                | N-Term(iTRAQ4plex); K8(iTRAQ4  | 1 | 1 |
| [R].WELcDIPR.[C]                | C4(Carbamidomethyl)            | 1 | 1 |
| [R].tPENFPck.[N]                | N-Term(iTRAQ4plex); C7(Carbam  | 1 | 1 |
| [K].tMSGLEcQAWDSQSPHAHGYPsk.[F] | N-Term(iTRAQ4plex); C7(Carbam  | 1 | 1 |
| [R].nPDNDPQGPWcYTTDPEk.[R]      | N-Term(iTRAQ4plex); C11(Carbam | 1 | 1 |
| [K].nLDENYcR.[N]                | N-Term(iTRAQ4plex); C7(Carbam  | 1 | 1 |
| [K].NLDENYcR.[N]                | C7(Carbamidomethyl)            | 1 | 1 |
| [K].ISSPAVITdk.[V]              | N-Term(iTRAQ4plex); K10(iTRAQ  | 1 | 1 |
| [K].ISSPAVITdk.[V]              | N-Term(iTRAQ4plex); K10(iTRAQ  | 1 | 1 |
| [K].cEEDEEFTcR.[A]              | N-Term(iTRAQ4plex); C1(Carbam  | 1 | 1 |
| [R].aFQYHsk.[E]                 | N-Term(iTRAQ4plex); K7(iTRAQ4  | 1 | 3 |
| [R].nPDNDPQGPWcYTTDPEk.[R]      | N-Term(iTRAQ4plex); C11(Carbam | 1 | 1 |
| [K].kVYLSEck.[T]                | N-Term(iTRAQ4plex); K1(iTRAQ4  | 1 | 1 |
| [R].tPENFPck.[N]                | N-Term(iTRAQ4plex); C7(Carbam  | 1 | 1 |
| [R].nPDADkGPWcFTTDPsvr.[W]      | N-Term(iTRAQ4plex); K6(iTRAQ4  | 1 | 1 |

|                                     |                                |   |   |
|-------------------------------------|--------------------------------|---|---|
| [K].nLDENYcR.[N]                    | N-Term(iTRAQ4plex); C7(Carbam  | 1 | 1 |
| [R].rPcFSALEVEDETYVPk.[E]           | N-Term(iTRAQ4plex); C3(Carbam  | 1 | 1 |
| [R].rPcFSALEVEDETYVPk.[E]           | N-Term(iTRAQ4plex); C3(Carbam  | 1 | 1 |
| [K].aVmDDFAAFVEk.[C]                | N-Term(iTRAQ4plex); M3(Oxidati | 1 | 1 |
| [K].aVmDDFAAFVEk.[C]                | N-Term(iTRAQ4plex); M3(Oxidati | 1 | 1 |
| [K].aVmDDFAAFVEk.[C]                | N-Term(iTRAQ4plex); M3(Oxidati | 1 | 1 |
| [K].qNcELFEQLGEYk.[F]               | N-Term(iTRAQ4plex); C3(Carbam  | 1 | 1 |
| [K].aVmDDFAAFVEk.[C]                | N-Term(iTRAQ4plex); M3(Oxidati | 1 | 1 |
| [K].aVmDDFAAFVEk.[C]                | N-Term(iTRAQ4plex); M3(Oxidati | 1 | 1 |
| [R].yTKkVPQVSTPTLVEVSR.[N]          | N-Term(iTRAQ4plex); K4(iTRAQ4  | 1 | 1 |
| [R].yTkKVPQVSTPTLVEVSR.[N]          | N-Term(iTRAQ4plex); K3(iTRAQ4  | 1 | 1 |
| [R].YTkkVPQVSTPTLVEVSR.[N]          | K3(iTRAQ4plex); K4(iTRAQ4plex) | 1 | 1 |
| [K].qTALVELVk.[H]                   | N-Term(iTRAQ4plex); K9(iTRAQ4  | 1 | 1 |
| [K].vHTEccHGDLLcADDR.[A]            | N-Term(iTRAQ4plex); C5(Carbam  | 1 | 1 |
| [K].tcVADESAENcDk.[S]               | N-Term(iTRAQ4plex); C2(Carbam  | 1 | 1 |
| [R].lkcASLQk.[F]                    | N-Term(iTRAQ4plex); K2(iTRAQ4  | 1 | 1 |
| [K].TcVADESAENcDk.[S]               | C2(Carbamidomethyl); C11(Carb  | 1 | 1 |
| [K].aDDkETcFAEEGk.[K]               | N-Term(iTRAQ4plex); K4(iTRAQ4  | 1 | 1 |
| [K].kYLYEIAR.[R]                    | N-Term(iTRAQ4plex); K1(iTRAQ4  | 1 | 1 |
| [K].aVmDDFAAFVEk.[C]                | N-Term(iTRAQ4plex); M3(Oxidati | 1 | 1 |
| [K].aVmDDFAAFVEk.[C]                | N-Term(iTRAQ4plex); M3(Oxidati | 1 | 1 |
| [K].aVmDDFAAFVEk.[C]                | N-Term(iTRAQ4plex); M3(Oxidati | 1 | 1 |
| [K].aVmDDFAAFVEk.[C]                | N-Term(iTRAQ4plex); M3(Oxidati | 1 | 1 |
| [K].aVmDDFAAFVEk.[C]                | N-Term(iTRAQ4plex); M3(Oxidati | 1 | 1 |
| [K].aVmDDFAAFVEk.[C]                | N-Term(iTRAQ4plex); M3(Oxidati | 1 | 1 |
| [K].aVmDDFAAFVEk.[C]                | N-Term(iTRAQ4plex); K12(iTRAQ  | 1 | 1 |
| [K].sHcIAEVENDEMPADLPSLAADFVESk.[D] | N-Term(iTRAQ4plex); C3(Carbam  | 1 | 1 |
| [K].aVmDDFAAFVEk.[C]                | N-Term(iTRAQ4plex); K12(iTRAQ  | 1 | 1 |
| [K].aVmDDFAAFVEk.[C]                | N-Term(iTRAQ4plex); K12(iTRAQ  | 1 | 1 |
| [K].aVmDDFAAFVEk.[C]                | N-Term(iTRAQ4plex); K12(iTRAQ  | 1 | 1 |
| [K].aVmDDFAAFVEk.[C]                | N-Term(iTRAQ4plex); K12(iTRAQ  | 1 | 1 |
| [K].aVmDDFAAFVEk.[C]                | N-Term(iTRAQ4plex); K12(iTRAQ  | 1 | 1 |
| [K].aVmDDFAAFVEk.[C]                | N-Term(iTRAQ4plex); K12(iTRAQ  | 1 | 1 |
| [K].aVmDDFAAFVEk.[C]                | N-Term(iTRAQ4plex); K12(iTRAQ  | 1 | 1 |
| [K].aVmDDFAAFVEk.[C]                | N-Term(iTRAQ4plex); K12(iTRAQ  | 1 | 1 |
| [K].aVmDDFAAFVEk.[C]                | N-Term(iTRAQ4plex); K12(iTRAQ  | 1 | 1 |
| [R].rHPDYSVLLLLR.[L]                | N-Term(iTRAQ4plex)             | 1 | 1 |
| [R].RHPDYSVLLLLR.[L]                |                                | 1 | 1 |
| [R].rHPDYSVLLLLR.[L]                | N-Term(iTRAQ4plex)             | 1 | 1 |
| [R].rHPDYSVLLLLR.[L]                | N-Term(iTRAQ4plex)             | 1 | 1 |
| [R].rHPDYSVLLLLR.[L]                | N-Term(iTRAQ4plex)             | 1 | 1 |
| [R].rHPDYSVLLLLR.[L]                | N-Term(iTRAQ4plex)             | 1 | 1 |
| [R].rHPDYSVLLLLR.[L]                | N-Term(iTRAQ4plex)             | 1 | 1 |
| [R].rHPDYSVLLLLR.[L]                | N-Term(iTRAQ4plex)             | 1 | 1 |
| [R].rHPDYSVLLLLR.[L]                | N-Term(iTRAQ4plex)             | 1 | 1 |
| [R].rPcFSALEVEDETYVPk.[E]           | N-Term(iTRAQ4plex); C3(Carbam  | 1 | 1 |
| [R].rPcFSALEVEDETYVPk.[E]           | N-Term(iTRAQ4plex); C3(Carbam  | 1 | 1 |
| [R].rPcFSALEVEDETYVPk.[E]           | N-Term(iTRAQ4plex); C3(Carbam  | 1 | 1 |
| [R].rPcFSALEVEDETYVPk.[E]           | N-Term(iTRAQ4plex); C3(Carbam  | 1 | 1 |
| [R].RPcFSALEVEDETYVPk.[E]           | C3(Carbamidomethyl); K16(iTRA  | 1 | 1 |
| [R].rPcFSALEVEDETYVPk.[E]           | N-Term(iTRAQ4plex); C3(Carbam  | 1 | 1 |
| [R].rPcFSALEVEDETYVPk.[E]           | N-Term(iTRAQ4plex); C3(Carbam  | 1 | 1 |
| [R].rPcFSALEVEDETYVPk.[E]           | N-Term(iTRAQ4plex); C3(Carbam  | 1 | 1 |
| [R].rPcFSALEVEDETYVPk.[E]           | N-Term(iTRAQ4plex); C3(Carbam  | 1 | 1 |
| [R].rPcFSALEVEDETYVPk.[E]           | N-Term(iTRAQ4plex); C3(Carbam  | 1 | 1 |

|                                     |                                         |   |   |
|-------------------------------------|-----------------------------------------|---|---|
| [K].IVNEVTEFAk.[T]                  | N-Term(iTRAQ4plex); K10(iTRAQ4plex)     | 1 | 1 |
| [K].IVNEVTEFAk.[T]                  | N-Term(iTRAQ4plex); K10(iTRAQ4plex)     | 1 | 1 |
| [K].IVNEVTEFAk.[T]                  | N-Term(iTRAQ4plex); K10(iTRAQ4plex)     | 1 | 1 |
| [K].IVNEVTEFAk.[T]                  | N-Term(iTRAQ4plex); K10(iTRAQ4plex)     | 1 | 1 |
| [K].aVmDDFAAFVEk.[C]                | N-Term(iTRAQ4plex); M3(Oxidation)       | 1 | 1 |
| [K].qNcELFEQLGEYk.[F]               | N-Term(iTRAQ4plex); C3(Carbamidomethyl) | 1 | 1 |
| [K].qNcELFEQLGEYk.[F]               | N-Term(iTRAQ4plex); C3(Carbamidomethyl) | 1 | 1 |
| [K].qNcELFEQLGEYk.[F]               | N-Term(iTRAQ4plex); C3(Carbamidomethyl) | 1 | 1 |
| [R].RHPDYSVLLLLR.[L]                |                                         | 1 | 1 |
| [K].kVPQVSTPTLVEVSR.[N]             | N-Term(iTRAQ4plex); K1(iTRAQ4plex)      | 1 | 1 |
| [K].kQTALVELVk.[H]                  | N-Term(iTRAQ4plex); K10(iTRAQ4plex)     | 1 | 1 |
| [K].kQTALVELVk.[H]                  | K1(iTRAQ4plex); K10(iTRAQ4plex)         | 1 | 1 |
| [K].kVPQVSTPTLVEVSR.[N]             | N-Term(iTRAQ4plex); K1(iTRAQ4plex)      | 1 | 1 |
| [K].tcVADESAENcDk.[S]               | N-Term(iTRAQ4plex); C2(Carbamidomethyl) | 1 | 1 |
| [K].sHcIAEVENDEMPADLPSLAADFVESk.[D] | N-Term(iTRAQ4plex); C3(Carbamidomethyl) | 1 | 1 |
| [K].sHcIAEVENDEMPADLPSLAADFVESk.[D] | N-Term(iTRAQ4plex); C3(Carbamidomethyl) | 1 | 1 |
| [R].rHPDYSVLLLLR.[L]                | N-Term(iTRAQ4plex)                      | 1 | 1 |
| [K].sHcIAEVENDEmPADLPSLAADFVESk.[D] | N-Term(iTRAQ4plex); C3(Carbamidomethyl) | 1 | 1 |
| [K].sHcIAEVENDEmPADLPSLAADFVESk.[D] | N-Term(iTRAQ4plex); C3(Carbamidomethyl) | 1 | 1 |
| [K].sHcIAEVENDEmPADLPSLAADFVESk.[D] | N-Term(iTRAQ4plex); C3(Carbamidomethyl) | 1 | 1 |
| [K].vHTEccHGDLLcADDR.[A]            | N-Term(iTRAQ4plex); C5(Carbamidomethyl) | 1 | 1 |
| [K].kVPQVSTPTLVEVSR.[N]             | N-Term(iTRAQ4plex); K1(iTRAQ4plex)      | 1 | 1 |
| [K].kVPQVSTPTLVEVSR.[N]             | N-Term(iTRAQ4plex); K1(iTRAQ4plex)      | 1 | 1 |
| [K].kVPQVSTPTLVEVSR.[N]             | N-Term(iTRAQ4plex); K1(iTRAQ4plex)      | 1 | 1 |
| [K].kVPQVSTPTLVEVSR.[N]             | N-Term(iTRAQ4plex); K1(iTRAQ4plex)      | 1 | 1 |
| [K].kVPQVSTPTLVEVSR.[N]             | N-Term(iTRAQ4plex); K1(iTRAQ4plex)      | 1 | 1 |
| [K].kVPQVSTPTLVEVSR.[N]             | N-Term(iTRAQ4plex); K1(iTRAQ4plex)      | 1 | 1 |
| [K].kVPQVSTPTLVEVSR.[N]             | N-Term(iTRAQ4plex); K1(iTRAQ4plex)      | 1 | 1 |
| [K].kVPQVSTPTLVEVSR.[N]             | N-Term(iTRAQ4plex); K1(iTRAQ4plex)      | 1 | 1 |
| [K].kVPQVSTPTLVEVSR.[N]             | N-Term(iTRAQ4plex); K1(iTRAQ4plex)      | 1 | 1 |
| [K].kVPQVSTPTLVEVSR.[N]             | N-Term(iTRAQ4plex); K1(iTRAQ4plex)      | 1 | 1 |
| [K].tcVADESAENcDk.[S]               | N-Term(iTRAQ4plex); C2(Carbamidomethyl) | 1 | 1 |
| [K].tcVADESAENcDk.[S]               | N-Term(iTRAQ4plex); C2(Carbamidomethyl) | 1 | 1 |
| [K].vHTEccHGDLLcADDR.[A]            | N-Term(iTRAQ4plex); C5(Carbamidomethyl) | 1 | 1 |
| [K].sLHTLFGDk.[L]                   | N-Term(iTRAQ4plex); K9(iTRAQ4plex)      | 1 | 1 |
| [K].sLHTLFGDk.[L]                   | N-Term(iTRAQ4plex); K9(iTRAQ4plex)      | 1 | 1 |
| [K].sLHTLFGDk.[L]                   | N-Term(iTRAQ4plex); K9(iTRAQ4plex)      | 1 | 1 |
| [K].sLHTLFGDk.[L]                   | N-Term(iTRAQ4plex); K9(iTRAQ4plex)      | 1 | 1 |
| [K].sLHTLFGDk.[L]                   | N-Term(iTRAQ4plex); K9(iTRAQ4plex)      | 1 | 1 |
| [K].sLHTLFGDk.[L]                   | N-Term(iTRAQ4plex); K9(iTRAQ4plex)      | 1 | 1 |
| [K].sLHTLFGDk.[L]                   | N-Term(iTRAQ4plex); K9(iTRAQ4plex)      | 1 | 1 |
| [K].sLHTLFGDk.[L]                   | N-Term(iTRAQ4plex); K9(iTRAQ4plex)      | 1 | 1 |
| [K].sLHTLFGDk.[L]                   | N-Term(iTRAQ4plex); K9(iTRAQ4plex)      | 1 | 1 |
| [R].hPDYSVLLLLR.[L]                 | N-Term(iTRAQ4plex)                      | 1 | 1 |
| [K].vPQVSTPTLVEVSR.[N]              | N-Term(iTRAQ4plex)                      | 1 | 1 |
| [R].rPcFSALEVDETYVPk.[E]            | N-Term(iTRAQ4plex); C3(Carbamidomethyl) | 1 | 1 |
| [K].vPQVSTPTLVEVSR.[N]              | N-Term(iTRAQ4plex)                      | 1 | 1 |
| [K].kVPQVSTPTLVEVSR.[N]             | K1(iTRAQ4plex)                          | 1 | 1 |
| [K].kVPQVSTPTLVEVSR.[N]             | N-Term(iTRAQ4plex); K1(iTRAQ4plex)      | 1 | 1 |
| [K].kQTALVELVk.[H]                  | N-Term(iTRAQ4plex); K1(iTRAQ4plex)      | 1 | 1 |
| [K].kQTALVELVk.[H]                  | N-Term(iTRAQ4plex); K1(iTRAQ4plex)      | 1 | 1 |
| [K].kQTALVELVk.[H]                  | N-Term(iTRAQ4plex); K1(iTRAQ4plex)      | 1 | 1 |
| [K].kQTALVELVk.[H]                  | N-Term(iTRAQ4plex); K1(iTRAQ4plex)      | 1 | 1 |
| [R].YkAAFTecCQAADk.[A]              | K2(iTRAQ4plex); C8(Carbamidomethyl)     | 1 | 1 |
| [R].yKAAFTecCQAADk.[A]              | N-Term(iTRAQ4plex); C8(Carbamidomethyl) | 1 | 1 |
| [K].kVPQVSTPTLVEVSR.[N]             | N-Term(iTRAQ4plex)                      | 1 | 1 |



|                                |                                |   |   |
|--------------------------------|--------------------------------|---|---|
| [K].tcVADESAENcDk.[S]          | N-Term(iTRAQ4plex); C2(Carbam  | 1 | 1 |
| [K].kVPQVSTPTLVEVSR.[N]        | N-Term(iTRAQ4plex); K1(iTRAQ4  | 1 | 1 |
| [K].kVPQVSTPTLVEVSR.[N]        | N-Term(iTRAQ4plex); K1(iTRAQ4  | 1 | 1 |
| [K].kVPQVSTPTLVEVSR.[N]        | N-Term(iTRAQ4plex); K1(iTRAQ4  | 1 | 1 |
| [K].kVPQVSTPTLVEVSR.[N]        | N-Term(iTRAQ4plex); K1(iTRAQ4  | 1 | 1 |
| [R].IVRPEVDVMcTAFHDNEETFLk.[K] | N-Term(iTRAQ4plex); C10(Carbar | 1 | 1 |
| [R].IVRPEVDVMcTAFHDNEETFLk.[K] | N-Term(iTRAQ4plex); C10(Carbar | 1 | 1 |
| [R].IVRPEVDVMcTAFHDNEETFLk.[K] | N-Term(iTRAQ4plex); C10(Carbar | 1 | 1 |
| [R].IVRPEVDVMcTAFHDNEETFLk.[K] | N-Term(iTRAQ4plex); C10(Carbar | 1 | 1 |
| [R].IVRPEVDVMcTAFHDNEETFLk.[K] | N-Term(iTRAQ4plex); C10(Carbar | 1 | 1 |
| [K].vFDEFkPLVEEPQNLik.[Q]      | N-Term(iTRAQ4plex); K17(iTRAQ  | 1 | 1 |
| [K].vFDEFkPLVEEPQNLik.[Q]      | K6(iTRAQ4plex); K17(iTRAQ4ple  | 1 | 1 |
| [R].IVRPEVDVMcTAFHDNEETFLk.[K] | N-Term(iTRAQ4plex); C10(Carbar | 1 | 1 |
| [R].IVRPEVDVMcTAFHDNEETFLk.[K] | N-Term(iTRAQ4plex); C10(Carbar | 1 | 1 |
| [R].IVRPEVDVMcTAFHDNEETFLk.[K] | N-Term(iTRAQ4plex); C10(Carbar | 1 | 1 |
| [R].IVRPEVDVMcTAFHDNEETFLk.[K] | N-Term(iTRAQ4plex); C10(Carbar | 1 | 1 |
| [R].IVRPEVDVMcTAFHDNEETFLk.[K] | N-Term(iTRAQ4plex); C10(Carbar | 1 | 1 |
| [R].IVRPEVDVMcTAFHDNEETFLk.[K] | N-Term(iTRAQ4plex); C10(Carbar | 1 | 1 |
| [R].IVRPEVDVMcTAFHDNEETFLk.[K] | N-Term(iTRAQ4plex); C10(Carbar | 1 | 1 |
| [R].IVRPEVDVMcTAFHDNEETFLk.[K] | N-Term(iTRAQ4plex); C10(Carbar | 1 | 1 |
| [R].IVRPEVDVMcTAFHDNEETFLk.[K] | N-Term(iTRAQ4plex); C10(Carbar | 1 | 1 |
| [R].IVRPEVDVMcTAFHDNEETFLk.[K] | N-Term(iTRAQ4plex); C10(Carbar | 1 | 1 |
| [K].vFDEFkPLVEEPQNLik.[Q]      | N-Term(iTRAQ4plex); K6(iTRAQ4  | 1 | 1 |
| [K].vFDEFkPLVEEPQNLik.[Q]      | N-Term(iTRAQ4plex); K6(iTRAQ4  | 1 | 1 |
| [K].vFDEFkPLVEEPQNLik.[Q]      | N-Term(iTRAQ4plex); K6(iTRAQ4  | 1 | 1 |
| [K].vFDEFkPLVEEPQNLik.[Q]      | N-Term(iTRAQ4plex); K6(iTRAQ4  | 1 | 1 |
| [K].vFDEFkPLVEEPQNLik.[Q]      | N-Term(iTRAQ4plex); K6(iTRAQ4  | 1 | 1 |
| [K].vFDEFkPLVEEPQNLik.[Q]      | N-Term(iTRAQ4plex); K6(iTRAQ4  | 1 | 1 |
| [K].vFDEFkPLVEEPQNLik.[Q]      | N-Term(iTRAQ4plex); K6(iTRAQ4  | 1 | 1 |
| [K].vFDEFkPLVEEPQNLik.[Q]      | N-Term(iTRAQ4plex); K6(iTRAQ4  | 1 | 1 |
| [R].IVRPEVDVmcTAFHDNEETFLk.[K] | N-Term(iTRAQ4plex); M9(Oxidati | 1 | 1 |
| [K].eFNAETFTFHADicTLSEk.[E]    | N-Term(iTRAQ4plex); C14(Carbar | 1 | 1 |
| [K].eFNAETFTFHADicTLSEk.[E]    | N-Term(iTRAQ4plex); C14(Carbar | 1 | 1 |
| [K].eFNAETFTFHADicTLSEk.[E]    | N-Term(iTRAQ4plex); C14(Carbar | 1 | 1 |
| [R].LVRPEVDVMcTAFHDNEETFLk.[K] | C10(Carbamidomethyl); K22(iTR  | 1 | 1 |
| [K].eFNAETFTFHADicTLSEk.[E]    | N-Term(iTRAQ4plex); C14(Carbar | 1 | 1 |
| [K].eFNAETFTFHADicTLSEk.[E]    | N-Term(iTRAQ4plex); C14(Carbar | 1 | 1 |
| [K].eFNAETFTFHADicTLSEk.[E]    | N-Term(iTRAQ4plex); C14(Carbar | 1 | 1 |
| [R].hPYFYAPELLFFAk.[R]         | N-Term(iTRAQ4plex); K14(iTRAQ  | 1 | 1 |
| [K].aDDkETcFAEEGkk.[L]         | N-Term(iTRAQ4plex); K4(iTRAQ4  | 1 | 1 |
| [K].AAfTEccQAADk.[A]           | C6(Carbamidomethyl); C7(Carba  | 1 | 1 |
| [R].hPYFYAPELLFFAk.[R]         | N-Term(iTRAQ4plex); K14(iTRAQ  | 1 | 1 |
| [K].VHTEccHGDLLecADDR.[A]      | C5(Carbamidomethyl); C6(Carba  | 1 | 1 |
| [K].VHTEccHGDLLecADDR.[A]      | C5(Carbamidomethyl); C6(Carba  | 1 | 1 |
| [K].VHTEccHGDLLecADDR.[A]      | C5(Carbamidomethyl); C6(Carba  | 1 | 1 |
| [K].IDELRDEGk.[A]              | N-Term(iTRAQ4plex); K9(iTRAQ4  | 1 | 1 |
| [K].tYETTLek.[C]               | N-Term(iTRAQ4plex); K8(iTRAQ4  | 1 | 1 |
| [R].nEcFLQHk.[D]               | N-Term(iTRAQ4plex); C3(Carbam  | 1 | 1 |
| [K].ccAAADPHEcYak.[V]          | N-Term(iTRAQ4plex); C1(Carbam  | 1 | 1 |
| [K].ccAAADPHEcYak.[V]          | N-Term(iTRAQ4plex); C1(Carbam  | 1 | 1 |
| [K].ccAAADPHEcYak.[V]          | N-Term(iTRAQ4plex); C1(Carbam  | 1 | 1 |
| [K].ccTESLVNR.[R]              | N-Term(iTRAQ4plex); C1(Carbam  | 1 | 1 |
| [K].tcVADESAENcDk.[S]          | N-Term(iTRAQ4plex); C2(Carbam  | 1 | 1 |
| [K].aAfTEccQAADk.[A]           | N-Term(iTRAQ4plex); C6(Carbam  | 1 | 1 |
| [K].aAfTEccQAADk.[A]           | N-Term(iTRAQ4plex); C6(Carbam  | 1 | 1 |
| [K].eccEkPLLEk.[S]             | N-Term(iTRAQ4plex); C2(Carbam  | 1 | 1 |

|                               |                                           |   |   |
|-------------------------------|-------------------------------------------|---|---|
| [K].IVAASQAALGL.[-]           | N-Term(iTRAQ4plex)                        | 1 | 1 |
| [R].rHPYFYAPELFFAk.[R]        | N-Term(iTRAQ4plex); K15(iTRAQ4plex)       | 1 | 1 |
| [R].rHPYFYAPELFFAk.[R]        | N-Term(iTRAQ4plex); K15(iTRAQ4plex)       | 1 | 1 |
| [R].rHPYFYAPELFFAk.[R]        | N-Term(iTRAQ4plex); K15(iTRAQ4plex)       | 1 | 1 |
| [R].nEcFLQHk.[D]              | N-Term(iTRAQ4plex); C3(Carbamidomethyl)   | 1 | 1 |
| [R].rHPYFYAPELFFAk.[R]        | N-Term(iTRAQ4plex); K15(iTRAQ4plex)       | 1 | 1 |
| [R].rHPYFYAPELFFAk.[R]        | N-Term(iTRAQ4plex); K15(iTRAQ4plex)       | 1 | 1 |
| [R].RHPYFYAPELFFAk.[R]        | K15(iTRAQ4plex)                           | 1 | 1 |
| [K].ylcENQDSISSk.[L]          | N-Term(iTRAQ4plex); C3(Carbamidomethyl)   | 1 | 1 |
| [K].ylcENQDSISSk.[L]          | N-Term(iTRAQ4plex); C3(Carbamidomethyl)   | 1 | 1 |
| [K].ylcENQDSISSk.[L]          | N-Term(iTRAQ4plex); C3(Carbamidomethyl)   | 1 | 1 |
| [K].dLGEENFk.[A]              | N-Term(iTRAQ4plex); K8(iTRAQ4plex)        | 1 | 1 |
| [K].dLGEENFk.[A]              | N-Term(iTRAQ4plex); K8(iTRAQ4plex)        | 1 | 1 |
| [K].ylcENQDSISSk.[L]          | N-Term(iTRAQ4plex); C3(Carbamidomethyl)   | 1 | 1 |
| [K].vHTEccHGDLEcADDR.[A]      | N-Term(iTRAQ4plex); C5(Carbamidomethyl)   | 1 | 1 |
| [K].vHTEccHGDLEcADDR.[A]      | N-Term(iTRAQ4plex); C5(Carbamidomethyl)   | 1 | 1 |
| [K].vHTEccHGDLEcADDR.[A]      | N-Term(iTRAQ4plex); C5(Carbamidomethyl)   | 1 | 1 |
| [K].vHTEccHGDLEcADDR.[A]      | N-Term(iTRAQ4plex); C5(Carbamidomethyl)   | 1 | 1 |
| [K].vHTEccHGDLEcADDR.[A]      | N-Term(iTRAQ4plex); C5(Carbamidomethyl)   | 1 | 1 |
| [K].IVAASQAALGL.[-]           | N-Term(iTRAQ4plex)                        | 1 | 1 |
| [K].vHTEccHGDLEcADDR.[A]      | N-Term(iTRAQ4plex); C5(Carbamidomethyl)   | 1 | 1 |
| [K].aEFAEVSk.[L]              | N-Term(iTRAQ4plex); K8(iTRAQ4plex)        | 1 | 1 |
| [K].vHTEccHGDLEcADDR.[A]      | N-Term(iTRAQ4plex); C5(Carbamidomethyl)   | 1 | 1 |
| [K].vHTEccHGDLEcADDR.[A]      | N-Term(iTRAQ4plex); C5(Carbamidomethyl)   | 1 | 1 |
| [K].IVAASQAALGL.[-]           | N-Term(iTRAQ4plex)                        | 1 | 1 |
| [K].vHTEccHGDLEcADDR.[A]      | N-Term(iTRAQ4plex); C5(Carbamidomethyl)   | 1 | 1 |
| [K].tcVADESAENcDk.[S]         | N-Term(iTRAQ4plex); C2(Carbamidomethyl)   | 1 | 1 |
| [R].fkDLGEENFk.[A]            | N-Term(iTRAQ4plex); K2(iTRAQ4plex)        | 1 | 1 |
| [K].tcVADESAENcDk.[S]         | N-Term(iTRAQ4plex); C2(Carbamidomethyl)   | 1 | 1 |
| [K].ccAAADPHEcYAk.[V]         | C1(Carbamidomethyl); C2(Carbamidomethyl)  | 1 | 1 |
| [K].tcVADESAENcDk.[S]         | N-Term(iTRAQ4plex); C2(Carbamidomethyl)   | 1 | 1 |
| [K].tcVADESAENcDk.[S]         | N-Term(iTRAQ4plex); C2(Carbamidomethyl)   | 1 | 1 |
| [R].fkDLGEENFk.[A]            | N-Term(iTRAQ4plex); K2(iTRAQ4plex)        | 1 | 1 |
| [K].ccTESLVNR.[R]             | C1(Carbamidomethyl); C2(Carbamidomethyl)  | 1 | 1 |
| [K].eTcFAEEGk.[L]             | N-Term(iTRAQ4plex); C3(Carbamidomethyl)   | 1 | 1 |
| [K].eTcFAEEGk.[K]             | N-Term(iTRAQ4plex); C3(Carbamidomethyl)   | 1 | 1 |
| [K].eTcFAEEGk.[K]             | N-Term(iTRAQ4plex); C3(Carbamidomethyl)   | 1 | 1 |
| [R].eTYGEmADccAk.[Q]          | N-Term(iTRAQ4plex); M6(Oxidation)         | 1 | 1 |
| [K].TcVADESAENcDk.[S]         | C2(Carbamidomethyl); C11(Carbamidomethyl) | 1 | 1 |
| [R].eTYGEmADccAk.[Q]          | N-Term(iTRAQ4plex); M6(Oxidation)         | 1 | 1 |
| [R].eTYGEmADccAk.[Q]          | N-Term(iTRAQ4plex); M6(Oxidation)         | 1 | 1 |
| [K].eTcFAEEGk.[K]             | N-Term(iTRAQ4plex); C3(Carbamidomethyl)   | 1 | 1 |
| [K].kLVAASQAALGL.[-]          | N-Term(iTRAQ4plex); K1(iTRAQ4plex)        | 1 | 1 |
| [K].tcVADESAENcDk.[S]         | N-Term(iTRAQ4plex); C2(Carbamidomethyl)   | 1 | 1 |
| [K].tcVADESAENcDk.[S]         | N-Term(iTRAQ4plex); C2(Carbamidomethyl)   | 1 | 1 |
| [K].dVFLGMFLYEYAR.[R]         | N-Term(iTRAQ4plex)                        | 1 | 1 |
| [K].tcVADESAENcDk.[S]         | N-Term(iTRAQ4plex); C2(Carbamidomethyl)   | 1 | 1 |
| [R].mPcAEDYLSVVLNQLcVLHEk.[T] | N-Term(iTRAQ4plex); M1(Oxidation)         | 1 | 1 |
| [K].LkEccEKPLLEk.[S]          | K2(iTRAQ4plex); C4(Carbamidomethyl)       | 1 | 1 |
| [K].aDDkETcFAEEGk.[K]         | N-Term(iTRAQ4plex); K4(iTRAQ4plex)        | 1 | 1 |
| [R].mPcAEDYLSVVLNQLcVLHEk.[T] | N-Term(iTRAQ4plex); C3(Carbamidomethyl)   | 1 | 1 |

|                                     |                               |   |   |
|-------------------------------------|-------------------------------|---|---|
| [R].mPcAEDYLSVVLNQLcVLHEk.[T]       | N-Term(iTRAQ4plex); C3(Carbam | 1 | 1 |
| [K].aDDkETcFAEEGk.[K]               | N-Term(iTRAQ4plex); K4(iTRAQ4 | 1 | 1 |
| [K].aDDkETcFAEEGk.[K]               | N-Term(iTRAQ4plex); K4(iTRAQ4 | 1 | 1 |
| [K].aDDkETcFAEEGk.[K]               | N-Term(iTRAQ4plex); K4(iTRAQ4 | 1 | 1 |
| [K].aDDkETcFAEEGk.[K]               | N-Term(iTRAQ4plex); K4(iTRAQ4 | 1 | 1 |
| [K].aDDkETcFAEEGk.[K]               | N-Term(iTRAQ4plex); K4(iTRAQ4 | 1 | 1 |
| [K].aDDkETcFAEEGk.[K]               | N-Term(iTRAQ4plex); K4(iTRAQ4 | 1 | 1 |
| [R].hPDYSVLLLR.[L]                  | N-Term(iTRAQ4plex)            | 1 | 1 |
| [K].aDDkETcFAEEGk.[K]               | N-Term(iTRAQ4plex); K4(iTRAQ4 | 1 | 1 |
| [R].eTYGEMADccAk.[Q]                | N-Term(iTRAQ4plex); C9(Carbam | 1 | 1 |
| [R].eTYGEMADccAk.[Q]                | N-Term(iTRAQ4plex); C9(Carbam | 1 | 1 |
| [R].eTYGEMADccAk.[Q]                | N-Term(iTRAQ4plex); C9(Carbam | 1 | 1 |
| [R].eTYGEMADccAk.[Q]                | N-Term(iTRAQ4plex); C9(Carbam | 1 | 1 |
| [R].eTYGEMADccAk.[Q]                | N-Term(iTRAQ4plex); C9(Carbam | 1 | 1 |
| [R].eTYGEMADccAk.[Q]                | N-Term(iTRAQ4plex); C9(Carbam | 1 | 1 |
| [R].eTYGEMADccAk.[Q]                | N-Term(iTRAQ4plex); C9(Carbam | 1 | 1 |
| [R].eTYGEMADccAk.[Q]                | N-Term(iTRAQ4plex); C9(Carbam | 1 | 1 |
| [R].eTYGEMADccAk.[Q]                | N-Term(iTRAQ4plex); C9(Carbam | 1 | 1 |
| [K].aDDkETcFAEEGk.[K]               | N-Term(iTRAQ4plex); K4(iTRAQ4 | 1 | 1 |
| [K].aDDkETcFAEEGk.[K]               | N-Term(iTRAQ4plex); K4(iTRAQ4 | 1 | 1 |
| [K].aDDkETcFAEEGk.[K]               | N-Term(iTRAQ4plex); K4(iTRAQ4 | 1 | 1 |
| [R].eTYGEMADccAk.[Q]                | N-Term(iTRAQ4plex); C9(Carbam | 1 | 1 |
| [K].eccEkPLLEk.[S]                  | N-Term(iTRAQ4plex); C2(Carbam | 1 | 1 |
| [R].RHPDYSVLLLR.[L]                 |                               | 1 | 1 |
| [K].aDDkETcFAEEGk.[K]               | N-Term(iTRAQ4plex); K4(iTRAQ4 | 1 | 1 |
| [K].IVNEVTEFAk.[T]                  | N-Term(iTRAQ4plex); K10(iTRAQ | 1 | 1 |
| [K].IVTDLTk.[V]                     | N-Term(iTRAQ4plex); K7(iTRAQ4 | 1 | 1 |
| [K].eTcFAEEGk.[K]                   | N-Term(iTRAQ4plex); C3(Carbam | 1 | 1 |
| [K].aVmDDFAAFVEk.[C]                | N-Term(iTRAQ4plex); M3(Oxidat | 1 | 1 |
| [K].IVTDLTk.[V]                     | N-Term(iTRAQ4plex); K7(iTRAQ4 | 1 | 1 |
| [K].AEFAEVSk.[L]                    | K8(iTRAQ4plex)                | 1 | 1 |
| [R].nEcFLQHk.[D]                    | N-Term(iTRAQ4plex); C3(Carbam | 1 | 1 |
| [K].kYLYEIAR.[R]                    | N-Term(iTRAQ4plex); K1(iTRAQ4 | 1 | 1 |
| [K].AVMDDFAAFVEk.[C]                | K12(iTRAQ4plex)               | 1 | 1 |
| [K].IVTDLTk.[V]                     | N-Term(iTRAQ4plex); K7(iTRAQ4 | 1 | 1 |
| [K].ccAAADPHecYak.[V]               | C1(Carbamidomethyl); C2(Carba | 1 | 1 |
| [K].sLHTLFGdk.[L]                   | N-Term(iTRAQ4plex); K9(iTRAQ4 | 1 | 1 |
| [K].tcVADESAENcDk.[S]               | N-Term(iTRAQ4plex); C2(Carbam | 1 | 1 |
| [K].tYETTLEk.[C]                    | N-Term(iTRAQ4plex); K8(iTRAQ4 | 1 | 1 |
| [K].eTcFAEEGk.[K]                   | N-Term(iTRAQ4plex); C3(Carbam | 1 | 1 |
| [K].IDELRDEGk.[A]                   | N-Term(iTRAQ4plex); K9(iTRAQ4 | 1 | 1 |
| [K].AEFAEVSk.[L]                    | K8(iTRAQ4plex)                | 1 | 1 |
| [K].aAFTEccQAADk.[A]                | N-Term(iTRAQ4plex); C6(Carbam | 1 | 1 |
| [K].aVmDDFAAFVEk.[C]                | N-Term(iTRAQ4plex); M3(Oxidat | 1 | 1 |
| [K].sHcIAEVENDEmPADLPSLAADFVESk.[D] | N-Term(iTRAQ4plex); C3(Carbam | 1 | 1 |
| [R].rHPDYSVLLLR.[L]                 | N-Term(iTRAQ4plex)            | 1 | 1 |
| [K].aEFAEVSk.[L]                    | N-Term(iTRAQ4plex); K8(iTRAQ4 | 1 | 1 |
| [K].IVTDLTk.[V]                     | N-Term(iTRAQ4plex); K7(iTRAQ4 | 1 | 1 |
| [K].vHTEccHGDLEcADDR.[A]            | N-Term(iTRAQ4plex); C5(Carbam | 1 | 1 |
| [K].aAFTEccQAADk.[A]                | N-Term(iTRAQ4plex); C6(Carbam | 1 | 1 |
| [R].rHPYFYAPELFFAk.[R]              | N-Term(iTRAQ4plex); K15(iTRAQ | 1 | 1 |

|                                |                                |   |   |
|--------------------------------|--------------------------------|---|---|
| [K].TcVADESAENcDk.[S]          | C2(Carbamidomethyl); C11(Carb  | 1 | 1 |
| [R].aFKAWAVAR.[L]              | N-Term(iTRAQ4plex)             | 1 | 1 |
| [R].nEcFLQHK.[D]               | N-Term(iTRAQ4plex); C3(Carbam  | 1 | 1 |
| [K].sLHTLFGDk.[L]              | N-Term(iTRAQ4plex); K9(iTRAQ4  | 1 | 1 |
| [K].qTALVELVk.[H]              | N-Term(iTRAQ4plex); K9(iTRAQ4  | 1 | 1 |
| [R].NEcFLQHK.[D]               | C3(Carbamidomethyl); K8(iTRAC  | 1 | 1 |
| [K].IVTDLTk.[V]                | N-Term(iTRAQ4plex); K7(iTRAQ4  | 1 | 1 |
| [K].ADDkETcFAEEGk.[K]          | K4(iTRAQ4plex); C7(Carbamidon  | 1 | 1 |
| [K].ADDkETcFAEEGk.[K]          | K4(iTRAQ4plex); C7(Carbamidon  | 1 | 1 |
| [K].kQTALVELVk.[H]             | N-Term(iTRAQ4plex); K1(iTRAQ4  | 1 | 1 |
| [R].eTYGEmADccAk.[Q]           | N-Term(iTRAQ4plex); M6(Oxidat  | 1 | 1 |
| [R].nEcFLQHK.[D]               | N-Term(iTRAQ4plex); C3(Carbam  | 1 | 1 |
| [K].fQNALLVR.[Y]               | N-Term(iTRAQ4plex)             | 1 | 1 |
| [K].eFNAETFTFHADicTLSEk.[E]    | N-Term(iTRAQ4plex); C14(Carbar | 1 | 1 |
| [K].aDDKETcFAEEGk.[K]          | N-Term(iTRAQ4plex); C7(Carbam  | 1 | 1 |
| [K].qTALVELVk.[H]              | N-Term(iTRAQ4plex); K9(iTRAQ4  | 1 | 1 |
| [K].dDNPnLPR.[L]               | N-Term(iTRAQ4plex)             | 1 | 1 |
| [K].IVTDLTk.[V]                | N-Term(iTRAQ4plex); K7(iTRAQ4  | 1 | 1 |
| [K].dDNPnLPR.[L]               | N-Term(iTRAQ4plex)             | 1 | 1 |
| [K].aDDKETcFAEEGk.[K]          | N-Term(iTRAQ4plex); K4(iTRAQ4  | 1 | 1 |
| [K].eFNAETFTFHADicTLSEk.[E]    | N-Term(iTRAQ4plex); C14(Carbar | 1 | 1 |
| [K].aVMDDFAAFVEk.[C]           | N-Term(iTRAQ4plex); K12(iTRAQ  | 1 | 1 |
| [K].aDDKETcFAEEGk.[K]          | N-Term(iTRAQ4plex); K4(iTRAQ4  | 1 | 1 |
| [K].ylcENQDSISSk.[L]           | N-Term(iTRAQ4plex); C3(Carbam  | 1 | 1 |
| [K].IVTDLTk.[V]                | N-Term(iTRAQ4plex); K7(iTRAQ4  | 1 | 1 |
| [K].dLGEENFk.[A]               | N-Term(iTRAQ4plex); K8(iTRAQ4  | 1 | 1 |
| [K].lcTVATLR.[E]               | N-Term(iTRAQ4plex); C2(Carbam  | 1 | 1 |
| [K].sLHTLFGDk.[L]              | N-Term(iTRAQ4plex); K9(iTRAQ4  | 1 | 1 |
| [K].lcTVATLR.[E]               | N-Term(iTRAQ4plex); C2(Carbam  | 1 | 1 |
| [K].ADDkETcFAEEGk.[K]          | K4(iTRAQ4plex); C7(Carbamidon  | 1 | 1 |
| [R].rHPDYSVLLLR.[L]            | N-Term(iTRAQ4plex)             | 1 | 1 |
| [K].aVmDDFAAFVEk.[C]           | N-Term(iTRAQ4plex); M3(Oxidat  | 1 | 1 |
| [K].ccTESLVNR.[R]              | N-Term(iTRAQ4plex); C1(Carbam  | 1 | 1 |
| [K].aAFTEccQAADk.[A]           | N-Term(iTRAQ4plex); C6(Carbam  | 1 | 1 |
| [R].IVRPEVDVMcTAFHDNEETFLk.[K] | N-Term(iTRAQ4plex); C10(Carbar | 1 | 1 |
| [K].VHTeCcHGDLLEcADDR.[A]      | C5(Carbamidomethyl); C6(Carba  | 1 | 1 |
| [K].IVTDLTk.[V]                | N-Term(iTRAQ4plex); K7(iTRAQ4  | 1 | 1 |
| [K].aVMDDFAAFVEk.[C]           | N-Term(iTRAQ4plex); K12(iTRAQ  | 1 | 1 |
| [K].aDDKETcFAEEGk.[K]          | N-Term(iTRAQ4plex); K4(iTRAQ4  | 1 | 1 |
| [K].kLVAASQAALGL.[-]           | N-Term(iTRAQ4plex); K1(iTRAQ4  | 1 | 1 |
| [K].tcVADESAENcDk.[S]          | N-Term(iTRAQ4plex); C2(Carbam  | 1 | 1 |
| [K].sLHTLFGDk.[L]              | N-Term(iTRAQ4plex); K9(iTRAQ4  | 1 | 1 |
| [R].rHPDYSVLLLR.[L]            | N-Term(iTRAQ4plex)             | 1 | 1 |
| [K].IVTDLTk.[V]                | N-Term(iTRAQ4plex); K7(iTRAQ4  | 1 | 1 |
| [K].dDNPnLPR.[L]               | N-Term(iTRAQ4plex)             | 1 | 1 |
| [K].aDDKETcFAEEGk.[L]          | N-Term(iTRAQ4plex); K4(iTRAQ4  | 1 | 1 |
| [K].aDDKETcFAEEGk.[K]          | N-Term(iTRAQ4plex); C7(Carbam  | 1 | 1 |
| [K].vFDEFkPLVEEPQNLIK.[Q]      | N-Term(iTRAQ4plex); K6(iTRAQ4  | 1 | 1 |
| [R].rHPDYSVLLLR.[L]            | N-Term(iTRAQ4plex)             | 1 | 1 |
| [R].nEcFLQHK.[D]               | N-Term(iTRAQ4plex); C3(Carbam  | 1 | 1 |
| [K].TYETTLek.[C]               | K8(iTRAQ4plex)                 | 1 | 1 |
| [K].vFDEFkPLVEEPQNLIK.[Q]      | N-Term(iTRAQ4plex); K17(iTRAQ  | 1 | 1 |

|                                |                                |   |   |
|--------------------------------|--------------------------------|---|---|
| [K].VHTEccHGDLLcADDR.[A]       | C5(Carbamidomethyl); C6(Carba  | 1 | 1 |
| [K].qNcELFEQLGEYk.[F]          | N-Term(iTRAQ4plex); C3(Carbam  | 1 | 1 |
| [K].IcTVATLR.[E]               | N-Term(iTRAQ4plex); C2(Carbam  | 1 | 1 |
| [R].rPcFSALEVEDETYVPk.[E]      | N-Term(iTRAQ4plex); C3(Carbam  | 1 | 1 |
| [K].TYETTLEk.[C]               | K8(iTRAQ4plex)                 | 1 | 1 |
| [K].aVmDDFAAFVEk.[C]           | N-Term(iTRAQ4plex); M3(Oxidati | 1 | 1 |
| [R].eTYGEmADccAk.[Q]           | N-Term(iTRAQ4plex); M6(Oxidati | 1 | 1 |
| [R].eTYGEmADccAk.[Q]           | N-Term(iTRAQ4plex); M6(Oxidati | 1 | 1 |
| [K].IDELRDEGk.[A]              | N-Term(iTRAQ4plex); K9(iTRAQ4  | 1 | 1 |
| [R].eTYGEmADccAk.[Q]           | N-Term(iTRAQ4plex); M6(Oxidati | 1 | 1 |
| [K].IVTDLTk.[V]                | N-Term(iTRAQ4plex); K7(iTRAQ4  | 1 | 1 |
| [R].ETYGEMADccAk.[Q]           | C9(Carbamidomethyl); C10(Carb  | 1 | 1 |
| [R].eTYGEmADccAk.[Q]           | N-Term(iTRAQ4plex); M6(Oxidati | 1 | 1 |
| [K].aVmDDFAAFVEk.[C]           | N-Term(iTRAQ4plex); M3(Oxidati | 1 | 1 |
| [K].tcVADESAENcDk.[S]          | N-Term(iTRAQ4plex); C2(Carbam  | 1 | 1 |
| [K].ccTESLVNR.[R]              | N-Term(iTRAQ4plex); C1(Carbam  | 1 | 1 |
| [K].TYETTLEk.[C]               | K8(iTRAQ4plex)                 | 1 | 1 |
| [K].aDDkETcFAEEGk.[K]          | N-Term(iTRAQ4plex); K4(iTRAQ4  | 1 | 1 |
| [K].dDNPnLPR.[L]               | N-Term(iTRAQ4plex)             | 1 | 1 |
| [K].aDDkETcFAEEGk.[K]          | N-Term(iTRAQ4plex); K4(iTRAQ4  | 1 | 1 |
| [K].aDDkETcFAEEGk.[K]          | N-Term(iTRAQ4plex); K4(iTRAQ4  | 1 | 1 |
| [K].aDDkETcFAEEGk.[K]          | N-Term(iTRAQ4plex); K4(iTRAQ4  | 1 | 1 |
| [K].aDDkETcFAEEGk.[K]          | N-Term(iTRAQ4plex); K4(iTRAQ4  | 1 | 1 |
| [K].YIcENQDSISSk.[L]           | C3(Carbamidomethyl); K12(iTRA  | 1 | 1 |
| [R].aFkAWAVAR.[L]              | N-Term(iTRAQ4plex); K3(iTRAQ4  | 1 | 1 |
| [K].sLHTLFGDk.[L]              | N-Term(iTRAQ4plex); K9(iTRAQ4  | 1 | 1 |
| [K].dLGEENFk.[A]               | N-Term(iTRAQ4plex); K8(iTRAQ4  | 1 | 1 |
| [K].ADDkETcFAEEGk.[L]          | K4(iTRAQ4plex); C7(Carbamidon  | 1 | 1 |
| [K].LVNEVTEFAk.[T]             | K10(iTRAQ4plex)                | 1 | 1 |
| [K].FQNALLVR.[Y]               |                                | 1 | 1 |
| [K].eFNAETFTFHADicTLSEk.[E]    | N-Term(iTRAQ4plex); C14(Carbar | 1 | 1 |
| [K].dLGEENFk.[A]               | N-Term(iTRAQ4plex); K8(iTRAQ4  | 1 | 1 |
| [K].eFNAETFTFHADicTLSEk.[E]    | N-Term(iTRAQ4plex); C14(Carbar | 1 | 1 |
| [K].IDELRDEGk.[A]              | N-Term(iTRAQ4plex); K9(iTRAQ4  | 1 | 1 |
| [R].LSQRFPkAEFAEVSk.[L]        | K7(iTRAQ4plex); K15(iTRAQ4ple  | 1 | 1 |
| [K].eFNAETFTFHADicTLSEk.[E]    | N-Term(iTRAQ4plex); C14(Carbar | 1 | 1 |
| [K].LVAASQAALGL.[-]            |                                | 1 | 1 |
| [K].dDNPnLPR.[L]               | N-Term(iTRAQ4plex)             | 1 | 1 |
| [K].aDDkETcFAEEGk.[K]          | N-Term(iTRAQ4plex); K4(iTRAQ4  | 1 | 1 |
| [R].NEcFLQHk.[D]               | C3(Carbamidomethyl); K8(iTRAC  | 1 | 1 |
| [K].DLGEENFk.[A]               | K8(iTRAQ4plex)                 | 1 | 1 |
| [K].TYETTLEk.[C]               | K8(iTRAQ4plex)                 | 1 | 1 |
| [R].rPcFSALEVEDETYVPk.[E]      | N-Term(iTRAQ4plex); C3(Carbam  | 1 | 1 |
| [K].kQTALVELVk.[H]             | N-Term(iTRAQ4plex); K1(iTRAQ4  | 1 | 1 |
| [R].nEcFLQHk.[D]               | N-Term(iTRAQ4plex); C3(Carbam  | 1 | 1 |
| [K].vHTEccHGDLLcADDR.[A]       | N-Term(iTRAQ4plex); C5(Carbam  | 1 | 1 |
| [K].eccEKPLLEk.[S]             | N-Term(iTRAQ4plex); C2(Carbam  | 1 | 1 |
| [R].IVRPEVDVMcTAFHDNEETFLk.[K] | N-Term(iTRAQ4plex); C10(Carbar | 1 | 1 |
| [K].vFDEFkPLVEEPQNLik.[Q]      | N-Term(iTRAQ4plex); K6(iTRAQ4  | 1 | 1 |
| [K].eTcFAEEGk.[K]              | N-Term(iTRAQ4plex); C3(Carbam  | 1 | 1 |
| [K].aAFTEccQAADk.[A]           | N-Term(iTRAQ4plex); C6(Carbam  | 1 | 1 |
| [K].vFDEFkPLVEEPQNLik.[Q]      | N-Term(iTRAQ4plex); K6(iTRAQ4  | 1 | 1 |

|                                |                                |   |   |
|--------------------------------|--------------------------------|---|---|
| [K].aDDKETcFAEEGkk.[L]         | N-Term(iTRAQ4plex); K4(iTRAQ4  | 1 | 1 |
| [R].lVRPEVDVMcTAFHDNEETFLk.[K] | N-Term(iTRAQ4plex); C10(Carbar | 1 | 1 |
| [K].eFNAETFTFHADicTLSEk.[E]    | N-Term(iTRAQ4plex); C14(Carbar | 1 | 1 |
| [K].LVTDLTk.[V]                | K7(iTRAQ4plex)                 | 1 | 1 |
| [K].sLHTLFGDk.[L]              | N-Term(iTRAQ4plex); K9(iTRAQ4  | 1 | 1 |
| [K].ETcFAEEGk.[K]              | C3(Carbamidomethyl); K9(iTRAC  | 1 | 1 |
| [K].aEFAEVSk.[L]               | N-Term(iTRAQ4plex); K8(iTRAQ4  | 1 | 1 |
| [K].aVMDDFAAFVEk.[C]           | N-Term(iTRAQ4plex); K12(iTRAQ  | 1 | 1 |
| [K].vHTEccHGDLEcADDR.[A]       | N-Term(iTRAQ4plex); C5(Carbam  | 1 | 1 |
| [K].aDDKETcFAEEGk.[K]          | N-Term(iTRAQ4plex); K4(iTRAQ4  | 1 | 1 |
| [K].vHTEccHGDLEcADDR.[A]       | N-Term(iTRAQ4plex); C5(Carbam  | 1 | 1 |
| [R].eTYGEmADccAk.[Q]           | N-Term(iTRAQ4plex); M6(Oxidat  | 1 | 1 |
| [K].vFDEFKPLVEEPQNLik.[Q]      | N-Term(iTRAQ4plex); K17(iTRAQ  | 1 | 1 |
| [K].SLHTLFGDk.[L]              | K9(iTRAQ4plex)                 | 1 | 1 |
| [K].eFNAETFTFHADicTLSEk.[E]    | N-Term(iTRAQ4plex); C14(Carbar | 1 | 1 |
| [K].eTcFAEEGk.[K]              | N-Term(iTRAQ4plex); C3(Carbam  | 1 | 1 |
| [K].aDDKETcFAEEGkk.[L]         | N-Term(iTRAQ4plex); C7(Carbam  | 1 | 1 |
| [K].LVNEVTEFAk.[T]             | K10(iTRAQ4plex)                | 1 | 1 |
| [K].QTALVELVk.[H]              | K9(iTRAQ4plex)                 | 1 | 1 |
| [K].FQNALLVR.[Y]               |                                | 1 | 1 |
| [K].vHTEccHGDLEcADDR.[A]       | C5(Carbamidomethyl); C6(Carba  | 1 | 1 |
| [K].aVMDDFAAFVEk.[C]           | N-Term(iTRAQ4plex)             | 1 | 1 |
| [K].aDDKETcFAEEGkk.[L]         | N-Term(iTRAQ4plex); K4(iTRAQ4  | 1 | 1 |
| [K].sLHTLFGDk.[L]              | N-Term(iTRAQ4plex); K9(iTRAQ4  | 1 | 1 |
| [K].dDNPNLPR.[L]               | N-Term(iTRAQ4plex)             | 1 | 1 |
| [K].vFDEFKPLVEEPQNLik.[Q]      | N-Term(iTRAQ4plex); K6(iTRAQ4  | 1 | 1 |
| [K].TYETTLEk.[C]               | K8(iTRAQ4plex)                 | 1 | 1 |
| [K].tcVADESAENcDk.[S]          | N-Term(iTRAQ4plex); C2(Carbam  | 1 | 1 |
| [K].sLHTLFGDK.[L]              | N-Term(iTRAQ4plex)             | 1 | 1 |
| [K].kVPQVSTPTLVEVSR.[N]        | N-Term(iTRAQ4plex); K1(iTRAQ4  | 1 | 1 |
| [K].tYETTLEk.[C]               | N-Term(iTRAQ4plex); K8(iTRAQ4  | 1 | 1 |
| [K].kQTALVELVk.[H]             | N-Term(iTRAQ4plex); K1(iTRAQ4  | 1 | 1 |
| [K].lcTVATLR.[E]               | N-Term(iTRAQ4plex); C2(Carbam  | 1 | 1 |
| [K].qNcELFEQLGEYk.[F]          | N-Term(iTRAQ4plex); C3(Carbam  | 1 | 1 |
| [K].aEFAEVSk.[L]               | N-Term(iTRAQ4plex); K8(iTRAQ4  | 1 | 1 |
| [R].lVRPEVDVMcTAFHDNEETFLk.[K] | C10(Carbamidomethyl); K22(iTR  | 1 | 1 |
| [K].aDDKETcFAEEGk.[K]          | N-Term(iTRAQ4plex); K4(iTRAQ4  | 1 | 1 |
| [R].eTYGEmADccAk.[Q]           | N-Term(iTRAQ4plex); C9(Carbam  | 1 | 1 |
| [K].fQNALLVR.[Y]               | N-Term(iTRAQ4plex)             | 1 | 1 |
| [K].FQNALLVR.[Y]               |                                | 1 | 1 |
| [K].vPQVSTPTLVEVSR.[N]         | N-Term(iTRAQ4plex)             | 1 | 1 |
| [K].dLGEENFk.[A]               | N-Term(iTRAQ4plex); K8(iTRAQ4  | 1 | 1 |
| [K].aDDKETcFAEEGkk.[L]         | N-Term(iTRAQ4plex); K4(iTRAQ4  | 1 | 1 |
| [R].eTYGEmADccAk.[Q]           | N-Term(iTRAQ4plex); M6(Oxidat  | 1 | 1 |
| [R].eTYGEmADccAk.[Q]           | N-Term(iTRAQ4plex); M6(Oxidat  | 1 | 1 |
| [K].kVPQVSTPTLVEVSR.[N]        | N-Term(iTRAQ4plex); K1(iTRAQ4  | 1 | 1 |
| [K].eFNAETFTFHADicTLSEk.[E]    | N-Term(iTRAQ4plex); C14(Carbar | 1 | 1 |
| [R].nEcFLQHk.[D]               | N-Term(iTRAQ4plex); C3(Carbam  | 1 | 1 |
| [K].eFNAETFTFHADicTLSEk.[E]    | N-Term(iTRAQ4plex); C14(Carbar | 1 | 1 |
| [R].YtkkVPQVSTPTLVEVSR.[N]     | K3(iTRAQ4plex); K4(iTRAQ4plex) | 1 | 1 |
| [R].yTkKVPQVSTPTLVEVSR.[N]     | N-Term(iTRAQ4plex); K3(iTRAQ4  | 1 | 1 |
| [R].yTKKVPQVSTPTLVEVSR.[N]     | N-Term(iTRAQ4plex); K4(iTRAQ4  | 1 | 1 |

|                                   |                                |   |   |
|-----------------------------------|--------------------------------|---|---|
| [R].hPDYSVLLLR.[L]                | N-Term(iTRAQ4plex)             | 1 | 1 |
| [K].vFDEFkPLVEEPQNLik.[Q]         | N-Term(iTRAQ4plex); K6(iTRAQ4  | 1 | 1 |
| [K].eFNAETFTFHADicTLSEK.[E]       | N-Term(iTRAQ4plex); C14(Carbar | 1 | 1 |
| [K].TYETTLEK.[C]                  | K8(iTRAQ4plex)                 | 1 | 1 |
| [K].qTALVELVik.[H]                | N-Term(iTRAQ4plex); K9(iTRAQ4  | 1 | 1 |
| [K].aVMDDFAAFVEK.[C]              | N-Term(iTRAQ4plex); K12(iTRAQ  | 1 | 1 |
| [K].lcTVATLR.[E]                  | N-Term(iTRAQ4plex); C2(Carbam  | 1 | 1 |
| [K].lcTVATLR.[E]                  | N-Term(iTRAQ4plex); C2(Carbam  | 1 | 1 |
| [R].eTYGEmADccAk.[Q]              | N-Term(iTRAQ4plex); M6(Oxidati | 1 | 1 |
| [K].aDDKETcFAEEGk.[K]             | N-Term(iTRAQ4plex); K4(iTRAQ4  | 1 | 1 |
| [K].SLHTLFGDk.[L]                 | K9(iTRAQ4plex)                 | 1 | 1 |
| [K].SLHTLFGDk.[L]                 | K9(iTRAQ4plex)                 | 1 | 1 |
| [R].rPcFSALEVDETYVPk.[E]          | N-Term(iTRAQ4plex); C3(Carbam  | 1 | 1 |
| [R].lVRPEVDVMcTAFHDNEETFLk.[K]    | N-Term(iTRAQ4plex); C10(Carbar | 1 | 1 |
| [K].eFNAETFTFHADicTLSEK.[E]       | N-Term(iTRAQ4plex); C14(Carbar | 1 | 1 |
| [K].vHTEccHGDLLcADDR.[A]          | N-Term(iTRAQ4plex); C5(Carbam  | 1 | 1 |
| [K].ccTESLVNR.[R]                 | N-Term(iTRAQ4plex); C1(Carbam  | 1 | 1 |
| [R].eTYGEMADccAk.[Q]              | N-Term(iTRAQ4plex); C9(Carbam  | 1 | 1 |
| [R].eTYGEmADccAk.[Q]              | N-Term(iTRAQ4plex); M6(Oxidati | 1 | 1 |
| [K].dDNPNLPR.[L]                  | N-Term(iTRAQ4plex)             | 1 | 1 |
| [K].aVMDDFAAFVEK.[C]              | N-Term(iTRAQ4plex); K12(iTRAQ  | 1 | 1 |
| [K].FQNALLVR.[Y]                  |                                | 1 | 1 |
| [K].AAFTEccQAADk.[A]              | C6(Carbamidomethyl); C7(Carba  | 1 | 1 |
| [K].dINYVNPVIk.[W]                | N-Term(iTRAQ4plex); K10(iTRAQ  | 1 | 1 |
| [K].aFTEccVVASQLR.[A]             | N-Term(iTRAQ4plex); C5(Carbam  | 1 | 1 |
| [K].aFTEccVVASQLR.[A]             | N-Term(iTRAQ4plex); C5(Carbam  | 1 | 1 |
| [K].aFTEccVVASQLR.[A]             | N-Term(iTRAQ4plex); C5(Carbam  | 1 | 1 |
| [R].iVAcASYkPSR.[E]               | N-Term(iTRAQ4plex); C4(Carbam  | 1 | 1 |
| [R].iVAcASYkPSR.[E]               | N-Term(iTRAQ4plex); C4(Carbam  | 1 | 1 |
| [K].qcTMFYSTSNik.[I]              | N-Term(iTRAQ4plex); C2(Carbam  | 1 | 1 |
| [K].lQGTLPVEAR.[E]                | N-Term(iTRAQ4plex)             | 1 | 1 |
| [K].lQGTLPVEAR.[E]                | N-Term(iTRAQ4plex)             | 1 | 1 |
| [R].iVAcASYkPSR.[E]               | C4(Carbamidomethyl); K8(iTRAC  | 1 | 1 |
| [K].iTHYNYLILSk.[G]               | N-Term(iTRAQ4plex); K11(iTRAQ  | 1 | 1 |
| [K].iTHYNYLILSk.[G]               | N-Term(iTRAQ4plex); K11(iTRAQ  | 1 | 1 |
| [K].tLLPVSkPEIR.[S]               | N-Term(iTRAQ4plex); K7(iTRAQ4  | 1 | 1 |
| [K].tLLPVSkPEIR.[S]               | N-Term(iTRAQ4plex); K7(iTRAQ4  | 1 | 1 |
| [K].tLLPVSkPEIR.[S]               | N-Term(iTRAQ4plex); K7(iTRAQ4  | 1 | 1 |
| [K].dSLDQLVGGVPVTLNAQTIDVNQETSDDL | N-Term(iTRAQ4plex); K32(iTRAQ  | 1 | 1 |
| [K].eGMLSIMSyr.[N]                | N-Term(iTRAQ4plex)             | 1 | 1 |
| [K].aFDicPLVik.[I]                | N-Term(iTRAQ4plex); C5(Carbam  | 1 | 1 |
| [K].aTLLDIYk.[T]                  | N-Term(iTRAQ4plex); K8(iTRAQ4  | 1 | 1 |
| [K].aLVEGVdQLFTDYQIk.[D]          | N-Term(iTRAQ4plex); K16(iTRAQ  | 1 | 1 |
| [K].aLVEGVdQLFTDYQIk.[D]          | N-Term(iTRAQ4plex); K16(iTRAQ  | 1 | 1 |
| [K].aLVEGVdQLFTDYQIk.[D]          | N-Term(iTRAQ4plex); K16(iTRAQ  | 1 | 1 |
| [K].qLPGGQNPVSYVYLEVvSk.[H]       | N-Term(iTRAQ4plex); K19(iTRAQ  | 1 | 1 |
| [K].qLPGGQNPVSYVYLEVvSk.[H]       | N-Term(iTRAQ4plex); K19(iTRAQ  | 1 | 1 |
| [K].eNSQYQPIk.[L]                 | N-Term(iTRAQ4plex); K9(iTRAQ4  | 1 | 1 |
| [K].IDTQDIEASHYR.[G]              |                                | 1 | 1 |
| [R].eSYSGVTLDPR.[G]               | N-Term(iTRAQ4plex)             | 1 | 1 |
| [R].sYFPESWLWEVHLVPR.[R]          | N-Term(iTRAQ4plex)             | 1 | 1 |
| [R].sYFPESWLWEVHLVPR.[R]          | N-Term(iTRAQ4plex)             | 1 | 1 |

|                                   |                                |   |   |
|-----------------------------------|--------------------------------|---|---|
| [K].INLVATPLFLkPGIPYPIk.[V]       | N-Term(iTRAQ4plex); K11(iTRAQ4 | 1 | 1 |
| [K].INLVATPLFLkPGIPYPIk.[V]       | N-Term(iTRAQ4plex); K11(iTRAQ4 | 1 | 1 |
| [K].kccYDGAcVNNDETcEQR.[A]        | N-Term(iTRAQ4plex); K1(iTRAQ4  | 1 | 1 |
| [K].kIEEIAAk.[Y]                  | N-Term(iTRAQ4plex); K1(iTRAQ4  | 1 | 1 |
| [K].dGHVILQLNSIPSSDFLcVR.[F]      | N-Term(iTRAQ4plex); C18(Carba  | 1 | 1 |
| [K].fSDASYQSINIPVTQNMVPSR.[L]     | N-Term(iTRAQ4plex)             | 1 | 1 |
| [K].iDTQDIEASHYR.[G]              | N-Term(iTRAQ4plex)             | 1 | 1 |
| [R].vYSLNDDLkPAk.[R]              | N-Term(iTRAQ4plex); K9(iTRAQ4  | 1 | 1 |
| [K].fQNSAILTIQPk.[Q]              | N-Term(iTRAQ4plex); K12(iTRAQ4 | 1 | 1 |
| [K].tSTSEEVcSFYLk.[I]             | N-Term(iTRAQ4plex); C8(Carbam  | 1 | 1 |
| [R].yIYPLDSLTIWIEYWPR.[D]         | N-Term(iTRAQ4plex)             | 1 | 1 |
| [R].yIYPLDSLTIWIEYWPR.[D]         | N-Term(iTRAQ4plex)             | 1 | 1 |
| [R].vDDGVASFVNLPSGVTVLEFNvk.[T]   | N-Term(iTRAQ4plex); K24(iTRAQ4 | 1 | 1 |
| [K].TDAPDLPEENQAR.[E]             |                                | 1 | 1 |
| [K].ccYDGAcVNNDETcEQR.[A]         | C1(Carbamidomethyl); C2(Carba  | 1 | 1 |
| [K].gLLVGEILSAVLSQEGINILTHLPk.[G] | N-Term(iTRAQ4plex); K25(iTRAQ4 | 1 | 1 |
| [K].aLLVGEHLNIIIVTPk.[S]          | N-Term(iTRAQ4plex); K15(iTRAQ4 | 1 | 1 |
| [K].gLLVGEILSAVLSQEGINILTHLPk.[G] | N-Term(iTRAQ4plex); K25(iTRAQ4 | 1 | 1 |
| [K].kIEEIAAk.[Y]                  | N-Term(iTRAQ4plex); K1(iTRAQ4  | 1 | 1 |
| [K].aLLVGEHLNIIIVTPk.[S]          | N-Term(iTRAQ4plex); K15(iTRAQ4 | 1 | 1 |
| [K].aLLVGEHLNIIIVTPk.[S]          | N-Term(iTRAQ4plex); K15(iTRAQ4 | 1 | 1 |
| [K].ccYDGAcVNNDETcEQR.[A]         | N-Term(iTRAQ4plex); C1(Carbam  | 1 | 1 |
| [R].vFQFLEk.[S]                   | N-Term(iTRAQ4plex); K7(iTRAQ4  | 1 | 1 |
| [K].tDAPDLPEENQAR.[E]             | N-Term(iTRAQ4plex)             | 1 | 1 |
| [K].tDAPDLPEENQAR.[E]             | N-Term(iTRAQ4plex)             | 1 | 1 |
| [K].dINYVNPVik.[W]                | N-Term(iTRAQ4plex); K10(iTRAQ4 | 1 | 1 |
| [K].dINYVNPVik.[W]                | N-Term(iTRAQ4plex); K10(iTRAQ4 | 1 | 1 |
| [R].lSmDIDVSYk.[H]                | N-Term(iTRAQ4plex); M3(Oxidati | 1 | 1 |
| [K].dSSVPNTGTAR.[M]               | N-Term(iTRAQ4plex)             | 1 | 1 |
| [R].qYLIMGk.[E]                   | N-Term(iTRAQ4plex); K7(iTRAQ4  | 1 | 1 |
| [K].eGMLSIMSYR.[N]                | N-Term(iTRAQ4plex)             | 1 | 1 |
| [K].dSSVPNTGTAR.[M]               | N-Term(iTRAQ4plex)             | 1 | 1 |
| [K].TLLPVSkPEIR.[S]               | K7(iTRAQ4plex)                 | 1 | 1 |
| [R].eSYSGVTLDPR.[G]               | N-Term(iTRAQ4plex)             | 1 | 1 |
| [K].yVLSPYk.[L]                   | N-Term(iTRAQ4plex); K7(iTRAQ4  | 1 | 1 |
| [K].vTcTNAELVik.[G]               | N-Term(iTRAQ4plex); C3(Carbam  | 1 | 1 |
| [K].dSEITFIk.[K]                  | N-Term(iTRAQ4plex); K8(iTRAQ4  | 1 | 1 |
| [R].vYSLNDDLkPAk.[R]              | N-Term(iTRAQ4plex); K9(iTRAQ4  | 1 | 1 |
| [K].aFTEccVVASQLR.[A]             | N-Term(iTRAQ4plex); C5(Carbam  | 1 | 1 |
| [R].vYSLNDDLkPAkR.[E]             | N-Term(iTRAQ4plex); K9(iTRAQ4  | 1 | 1 |
| [K].TGEAVAEk.[D]                  | K8(iTRAQ4plex)                 | 1 | 1 |
| [K].dSSVPNTGTAR.[M]               | N-Term(iTRAQ4plex)             | 1 | 1 |
| [R].kAFDIcPLVik.[I]               | N-Term(iTRAQ4plex); K1(iTRAQ4  | 1 | 1 |
| [R].iVAcASYkPSR.[E]               | C4(Carbamidomethyl); K8(iTRAC  | 1 | 1 |
| [K].vSITSITVENVFVik.[Y]           | N-Term(iTRAQ4plex); K14(iTRAQ4 | 1 | 1 |
| [K].ITHYNYLILSk.[G]               | K11(iTRAQ4plex)                | 1 | 1 |
| [K].vcEGAACK.[C]                  | N-Term(iTRAQ4plex); C2(Carbam  | 1 | 1 |
| [K].vcEGAACK.[C]                  | N-Term(iTRAQ4plex); C2(Carbam  | 1 | 1 |
| [K].iDTALIk.[A]                   | N-Term(iTRAQ4plex); K7(iTRAQ4  | 1 | 1 |
| [R].iVAcASYkPSR.[E]               | N-Term(iTRAQ4plex); C4(Carbam  | 1 | 1 |
| [R].kAFDIcPLVik.[I]               | N-Term(iTRAQ4plex); C6(Carbam  | 1 | 1 |
| [R].kAFDIcPLVik.[I]               | K1(iTRAQ4plex); C6(Carbamidon  | 1 | 1 |



|                           |                               |   |   |
|---------------------------|-------------------------------|---|---|
| [K].ccYDGAcVNNDETcEQR.[A] | N-Term(iTRAQ4plex); C1(Carbam | 1 | 1 |
| [K].eNSQYQPIk.[L]         | N-Term(iTRAQ4plex); K9(iTRAQ4 | 1 | 1 |
| [K].tLLPVSkPEIR.[S]       | N-Term(iTRAQ4plex); K7(iTRAQ4 | 1 | 1 |
| [K].IDTALIk.[A]           | K7(iTRAQ4plex)                | 1 | 1 |
| [K].tGEAVAEk.[D]          | N-Term(iTRAQ4plex); K8(iTRAQ4 | 1 | 1 |
| [K].tDAPDLPEENQAR.[E]     | N-Term(iTRAQ4plex)            | 1 | 1 |
| [K].TDAPDLPEENQAR.[E]     |                               | 1 | 1 |
| [K].ITHYNYLILSk.[G]       | K11(iTRAQ4plex)               | 1 | 1 |
| [R].VYSLNDDLkPAkR.[E]     | K9(iTRAQ4plex); K12(iTRAQ4ple | 1 | 1 |
| [K].tGEAVAEk.[D]          | N-Term(iTRAQ4plex); K8(iTRAQ4 | 1 | 1 |
| [R].iPLDLVpk.[T]          | N-Term(iTRAQ4plex); K8(iTRAQ4 | 1 | 1 |
| [R].VYSLNDDLkPAkR.[E]     | K9(iTRAQ4plex); K12(iTRAQ4ple | 1 | 1 |
| [R].vFQFLEk.[S]           | N-Term(iTRAQ4plex); K7(iTRAQ4 | 1 | 1 |
| [R].qYLIMGk.[E]           | N-Term(iTRAQ4plex); K7(iTRAQ4 | 1 | 1 |
| [R].iVAcASYkPSR.[E]       | N-Term(iTRAQ4plex); C4(Carbam | 1 | 1 |
| [K].tDAPDLPEENQAR.[E]     | N-Term(iTRAQ4plex)            | 1 | 1 |
| [R].sIVSALk.[R]           | N-Term(iTRAQ4plex); K7(iTRAQ4 | 1 | 1 |
| [R].kAFDlcPLVk.[I]        | N-Term(iTRAQ4plex); K1(iTRAQ4 | 1 | 1 |
| [K].ITHYNYLILSk.[G]       | K11(iTRAQ4plex)               | 1 | 1 |
| [K].iDTQDIEASHYR.[G]      | N-Term(iTRAQ4plex)            | 1 | 1 |
| [K].IEEIAAk.[Y]           | K7(iTRAQ4plex)                | 1 | 1 |
| [K].fQNSAILTIQPk.[Q]      | N-Term(iTRAQ4plex); K12(iTRAQ | 1 | 1 |
| [R].sIVSALk.[R]           | N-Term(iTRAQ4plex); K7(iTRAQ4 | 1 | 1 |
| [K].iDTALIk.[A]           | N-Term(iTRAQ4plex); K7(iTRAQ4 | 1 | 1 |
| [K].iTHYNYLILSk.[G]       | N-Term(iTRAQ4plex); K11(iTRAQ | 1 | 1 |
| [R].kQTAcKPEIAYAYk.[V]    | N-Term(iTRAQ4plex); K1(iTRAQ4 | 1 | 1 |
| [K].TDAPDLPEENQAR.[E]     |                               | 1 | 1 |
| [R].eDLkDDQk.[E]          | N-Term(iTRAQ4plex); K4(iTRAQ4 | 1 | 1 |
| [R].gYGNSDYk.[R]          | N-Term(iTRAQ4plex); K8(iTRAQ4 | 1 | 1 |
| [R].yGMWTIk.[A]           | N-Term(iTRAQ4plex); K7(iTRAQ4 | 1 | 1 |
| [R].VFQFLEk.[S]           | K7(iTRAQ4plex)                | 1 | 1 |
| [K].yVLSPYk.[L]           | N-Term(iTRAQ4plex); K7(iTRAQ4 | 1 | 1 |
| [R].sIVSALk.[R]           | N-Term(iTRAQ4plex); K7(iTRAQ4 | 1 | 1 |
| [R].iPLDLVpk.[T]          | N-Term(iTRAQ4plex); K8(iTRAQ4 | 1 | 1 |
| [K].iTHYNYLILSk.[G]       | N-Term(iTRAQ4plex); K11(iTRAQ | 1 | 1 |
| [K].iEEIAAk.[Y]           | N-Term(iTRAQ4plex); K7(iTRAQ4 | 1 | 1 |
| [K].dSSVPNTGTAR.[M]       | N-Term(iTRAQ4plex)            | 1 | 1 |
| [K].nFEITIk.[A]           | N-Term(iTRAQ4plex); K7(iTRAQ4 | 1 | 1 |
| [K].TDAPDLPEENQAR.[E]     |                               | 1 | 1 |
| [K].nFEITIk.[A]           | N-Term(iTRAQ4plex); K7(iTRAQ4 | 1 | 1 |
| [K].aTLLDIYk.[T]          | N-Term(iTRAQ4plex); K8(iTRAQ4 | 1 | 1 |
| [K].iDTQDIEASHYR.[G]      | N-Term(iTRAQ4plex)            | 1 | 1 |
| [K].ITHYNYLILSk.[G]       | K11(iTRAQ4plex)               | 1 | 1 |
| [K].tGEAVAEk.[D]          | N-Term(iTRAQ4plex); K8(iTRAQ4 | 1 | 1 |
| [K].dSEITFIk.[K]          | N-Term(iTRAQ4plex); K8(iTRAQ4 | 1 | 1 |
| [K].tDAPDLPEENQAR.[E]     | N-Term(iTRAQ4plex)            | 1 | 1 |
| [K].yVLSPYk.[L]           | N-Term(iTRAQ4plex); K7(iTRAQ4 | 1 | 1 |
| [K].aAQVTIQSSGTFSSk.[F]   | N-Term(iTRAQ4plex); K15(iTRAQ | 1 | 1 |
| [R].TEHPFTVEEFVLPk.[F]    | K14(iTRAQ4plex)               | 1 | 1 |
| [K].mcPQLQQYEmHGPEGLR.[V] | N-Term(iTRAQ4plex); C2(Carbam | 1 | 1 |
| [K].mcPQLQQYEMHGPEGLR.[V] | N-Term(iTRAQ4plex); M1(Oxidat | 1 | 1 |
| [K].mcPQLQQYEMHGPEGLR.[V] | N-Term(iTRAQ4plex); C2(Carbam | 1 | 1 |

|                               |                                |   |   |
|-------------------------------|--------------------------------|---|---|
| [K].mcPQLQQYEMHGPEGLR.[V]     | N-Term(iTRAQ4plex); C2(Carbam  | 1 | 1 |
| [K].mcPQLQQYEMHGPEGLR.[V]     | N-Term(iTRAQ4plex); C2(Carbam  | 1 | 1 |
| [K].mcPQLQQYEMHGPEGLR.[V]     | N-Term(iTRAQ4plex); C2(Carbam  | 1 | 1 |
| [K].IHTEAQIQEEGTVVELTGR.[Q]   | N-Term(iTRAQ4plex)             | 1 | 1 |
| [R].vGFYESDVMGR.[G]           | N-Term(iTRAQ4plex)             | 1 | 1 |
| [K].aAQVTIQSSGTFSSk.[F]       | N-Term(iTRAQ4plex); K15(iTRAQ  | 1 | 1 |
| [K].aAQVTIQSSGTFSSk.[F]       | N-Term(iTRAQ4plex); K15(iTRAQ  | 1 | 1 |
| [R].SSGSLNNAIk.[G]            | K11(iTRAQ4plex)                | 2 | 2 |
| [R].IVHVEEPHTETVR.[K]         | N-Term(iTRAQ4plex)             | 1 | 1 |
| [K].aAQVTIQSSGTFSSk.[F]       | N-Term(iTRAQ4plex); K15(iTRAQ  | 1 | 1 |
| [K].aAQVTIQSSGTFSSk.[F]       | N-Term(iTRAQ4plex); K15(iTRAQ  | 1 | 1 |
| [R].VTAAPQSVcALR.[A]          | C9(Carbamidomethyl)            | 1 | 1 |
| [K].aAQVTIQSSGTFSSk.[F]       | N-Term(iTRAQ4plex); K15(iTRAQ  | 1 | 1 |
| [K].vYDYYETDEFAIAEYNAPcSk.[D] | N-Term(iTRAQ4plex); C19(Carbar | 1 | 1 |
| [K].aAQVTIQSSGTFSSk.[F]       | N-Term(iTRAQ4plex); K15(iTRAQ  | 1 | 1 |
| [K].aAQVTIQSSGTFSSk.[F]       | N-Term(iTRAQ4plex); K15(iTRAQ  | 1 | 1 |
| [K].aAQVTIQSSGTFSSk.[F]       | N-Term(iTRAQ4plex); K15(iTRAQ  | 1 | 1 |
| [K].aAQVTIQSSGTFSSk.[F]       | N-Term(iTRAQ4plex); K15(iTRAQ  | 1 | 1 |
| [K].aAQVTIQSSGTFSSk.[F]       | N-Term(iTRAQ4plex); K15(iTRAQ  | 1 | 1 |
| [K].EEFPFALGVQTLPQTcDEPk.[A]  | C16(Carbamidomethyl); K20(iTR  | 1 | 1 |
| [K].vYDYYETDEFAIAEYNAPcSk.[D] | N-Term(iTRAQ4plex); C19(Carbar | 1 | 1 |
| [K].vYDYYETDEFAIAEYNAPcSk.[D] | N-Term(iTRAQ4plex); C19(Carbar | 1 | 1 |
| [K].vYDYYETDEFAIAEYNAPcSk.[D] | N-Term(iTRAQ4plex); C19(Carbar | 1 | 1 |
| [K].vYDYYETDEFAIAEYNAPcSk.[D] | N-Term(iTRAQ4plex); C19(Carbar | 1 | 1 |
| [K].vYDYYETDEFAIAEYNAPcSk.[D] | N-Term(iTRAQ4plex); C19(Carbar | 1 | 1 |
| [K].vYDYYETDEFAIAEYNAPcSk.[D] | N-Term(iTRAQ4plex); C19(Carbar | 1 | 1 |
| [K].IHTEAQIQEEGTVVELTGR.[Q]   | N-Term(iTRAQ4plex)             | 1 | 1 |
| [K].dTVIkPLLVEPEGLEk.[E]      | N-Term(iTRAQ4plex); K5(iTRAQ4  | 1 | 1 |
| [K].dTVIkPLLVEPEGLEk.[E]      | N-Term(iTRAQ4plex); K5(iTRAQ4  | 1 | 1 |
| [K].aAQVTIQSSGTFSSk.[F]       | N-Term(iTRAQ4plex); K15(iTRAQ  | 1 | 1 |
| [R].vTAAPQSVcALR.[A]          | N-Term(iTRAQ4plex); C9(Carbam  | 1 | 1 |
| [R].vTAAPQSVcALR.[A]          | N-Term(iTRAQ4plex); C9(Carbam  | 1 | 1 |
| [K].aAQVTIQSSGTFSSk.[F]       | N-Term(iTRAQ4plex); K15(iTRAQ  | 1 | 1 |
| [K].aAQVTIQSSGTFSSk.[F]       | N-Term(iTRAQ4plex); K15(iTRAQ  | 1 | 1 |
| [K].aAQVTIQSSGTFSSk.[F]       | N-Term(iTRAQ4plex); K15(iTRAQ  | 1 | 1 |
| [K].aAQVTIQSSGTFSSk.[F]       | N-Term(iTRAQ4plex); K15(iTRAQ  | 1 | 1 |
| [K].aAQVTIQSSGTFSSk.[F]       | N-Term(iTRAQ4plex); K15(iTRAQ  | 1 | 1 |
| [K].aAQVTIQSSGTFSSk.[F]       | N-Term(iTRAQ4plex); K15(iTRAQ  | 1 | 1 |
| [K].aAQVTIQSSGTFSSk.[F]       | N-Term(iTRAQ4plex); K15(iTRAQ  | 1 | 1 |
| [K].gHFSISIPVv.[S]            | N-Term(iTRAQ4plex); K10(iTRAQ  | 1 | 1 |
| [K].aAQVTIQSSGTFSSk.[F]       | N-Term(iTRAQ4plex); K15(iTRAQ  | 1 | 1 |
| [K].aAQVTIQSSGTFSSk.[F]       | N-Term(iTRAQ4plex); K15(iTRAQ  | 1 | 1 |
| [K].aAQVTIQSSGTFSSk.[F]       | N-Term(iTRAQ4plex); K15(iTRAQ  | 1 | 1 |
| [K].aIGYLNTGYQR.[Q]           | N-Term(iTRAQ4plex)             | 1 | 1 |
| [K].aIGYLNTGYQR.[Q]           | N-Term(iTRAQ4plex)             | 1 | 1 |
| [K].aIGYLNTGYQR.[Q]           | N-Term(iTRAQ4plex)             | 1 | 1 |
| [K].vDLSFSPSQSLPASHAHLR.[V]   | N-Term(iTRAQ4plex)             | 1 | 1 |
| [K].mVSGFIPLkPTVv.[M]         | N-Term(iTRAQ4plex); M1(Oxidati | 2 | 2 |
| [K].mVSGFIPLkPTVv.[M]         | N-Term(iTRAQ4plex); M1(Oxidati | 2 | 2 |
| [K].vDLSFSPSQSLPASHAHLR.[V]   | N-Term(iTRAQ4plex)             | 1 | 1 |
| [K].siYkPGQTVk.[F]            | N-Term(iTRAQ4plex); K4(iTRAQ4  | 1 | 1 |
| [K].siYkPGQTVk.[F]            | N-Term(iTRAQ4plex); K4(iTRAQ4  | 1 | 1 |

|                                     |                                |   |   |
|-------------------------------------|--------------------------------|---|---|
| [K].fSGQLNSHGcFYQQVk.[T]            | N-Term(iTRAQ4plex); C10(Carbar | 1 | 1 |
| [R].vSVQLEASPAFLAVPVEk.[E]          | N-Term(iTRAQ4plex); K18(iTRAQ  | 1 | 1 |
| [R].vSVQLEASPAFLAVPVEk.[E]          | N-Term(iTRAQ4plex); K18(iTRAQ  | 1 | 1 |
| [K].aIGYLNTGYQR.[Q]                 | N-Term(iTRAQ4plex)             | 1 | 1 |
| [K].gHFSISIPVvk.[S]                 | N-Term(iTRAQ4plex); K10(iTRAQ  | 1 | 1 |
| [K].gHFSISIPVvk.[S]                 | N-Term(iTRAQ4plex); K10(iTRAQ  | 1 | 1 |
| [K].aAQVTIQSSGTFSSk.[F]             | N-Term(iTRAQ4plex); K15(iTRAQ  | 1 | 1 |
| [K].aAQVTIQSSGTFSSk.[F]             | N-Term(iTRAQ4plex); K15(iTRAQ  | 1 | 1 |
| [K].aAQVTIQSSGTFSSk.[F]             | N-Term(iTRAQ4plex); K15(iTRAQ  | 1 | 1 |
| [R].nALFcLESAWk.[T]                 | N-Term(iTRAQ4plex); C5(Carbam  | 1 | 1 |
| [K].vDLSFSPSQSLPASHAHLR.[V]         | N-Term(iTRAQ4plex)             | 1 | 1 |
| [K].vTGEGcVYLQTSk.[Y]               | N-Term(iTRAQ4plex); C6(Carbam  | 1 | 1 |
| [K].qFSFPLSSEPFQGSyk.[V]            | N-Term(iTRAQ4plex); K16(iTRAQ  | 1 | 1 |
| [R].nALFcLESAWk.[T]                 | N-Term(iTRAQ4plex); C5(Carbam  | 1 | 1 |
| [R].nALFcLESAWk.[T]                 | N-Term(iTRAQ4plex); C5(Carbam  | 1 | 1 |
| [K].aTVLNLYPk.[C]                   | N-Term(iTRAQ4plex); K9(iTRAQ4  | 2 | 2 |
| [K].qQNAQGGFSTQDVTVALHALSk.[Y]      | N-Term(iTRAQ4plex); K23(iTRAQ  | 1 | 1 |
| [K].fEVQVTVPk.[I]                   | N-Term(iTRAQ4plex); K9(iTRAQ4  | 1 | 1 |
| [K].vTGEGcVYLQTSk.[Y]               | N-Term(iTRAQ4plex); C6(Carbam  | 1 | 1 |
| [K].vTGEGcVYLQTSk.[Y]               | N-Term(iTRAQ4plex); C6(Carbam  | 1 | 1 |
| [K].vTGEGcVYLQTSk.[Y]               | N-Term(iTRAQ4plex); C6(Carbam  | 1 | 1 |
| [K].vTGEGcVYLQTSk.[Y]               | N-Term(iTRAQ4plex); C6(Carbam  | 1 | 1 |
| [K].vTGEGcVYLQTSk.[Y]               | N-Term(iTRAQ4plex); C6(Carbam  | 1 | 1 |
| [K].vTGEGcVYLQTSk.[Y]               | N-Term(iTRAQ4plex); C6(Carbam  | 1 | 1 |
| [R].kDTVikPLLVEPEGLEk.[E]           | N-Term(iTRAQ4plex); K1(iTRAQ4  | 1 | 1 |
| [K].dMYSFLEDMGLk.[A]                | N-Term(iTRAQ4plex); K12(iTRAQ  | 1 | 1 |
| [K].dMYSFLEDMGLk.[A]                | N-Term(iTRAQ4plex); K12(iTRAQ  | 1 | 1 |
| [K].qQNAQGGFSTQDVTVALHALSk.[Y]      | N-Term(iTRAQ4plex); K23(iTRAQ  | 1 | 1 |
| [K].qQNAQGGFSTQDVTVALHALSk.[Y]      | N-Term(iTRAQ4plex); K23(iTRAQ  | 1 | 1 |
| [R].kDTVikPLLVEPEGLEk.[E]           | N-Term(iTRAQ4plex); K1(iTRAQ4  | 1 | 1 |
| [K].aIGYLNTGYQR.[Q]                 | N-Term(iTRAQ4plex)             | 1 | 1 |
| [R].LVHVEEPHTETVR.[K]               |                                | 1 | 1 |
| [R].IVHVEEPHTETVR.[K]               | N-Term(iTRAQ4plex)             | 1 | 1 |
| [R].qTVSWAVTPk.[S]                  | N-Term(iTRAQ4plex); K10(iTRAQ  | 1 | 1 |
| [R].qTVSWAVTPk.[S]                  | N-Term(iTRAQ4plex); K10(iTRAQ  | 1 | 1 |
| [R].tEVSSNHVLIYLDk.[V]              | N-Term(iTRAQ4plex); K14(iTRAQ  | 1 | 1 |
| [R].tEVSSNHVLIYLDk.[V]              | N-Term(iTRAQ4plex); K14(iTRAQ  | 1 | 1 |
| [K].eQAPHcIcANGR.[Q]                | N-Term(iTRAQ4plex); C6(Carbam  | 1 | 1 |
| [K].eQAPHcIcANGR.[Q]                | N-Term(iTRAQ4plex); C6(Carbam  | 1 | 1 |
| [R].tEVSSNHVLIYLDk.[V]              | N-Term(iTRAQ4plex); K14(iTRAQ  | 1 | 1 |
| [R].tEVSSNHVLIYLDk.[V]              | N-Term(iTRAQ4plex); K14(iTRAQ  | 1 | 1 |
| [K].yNILPEKEEFPFALGVQTLPQTcDEPk.[A] | N-Term(iTRAQ4plex); K7(iTRAQ4  | 1 | 1 |
| [K].yNILPEKEEFPFALGVQTLPQTcDEPk.[A] | N-Term(iTRAQ4plex); K7(iTRAQ4  | 1 | 1 |
| [K].eTTFNSLLcPSGGEVSEELSLk.[L]      | N-Term(iTRAQ4plex); C9(Carbam  | 1 | 1 |
| [K].eEFPFALGVQTLPQTcDEPk.[A]        | N-Term(iTRAQ4plex); C16(Carbar | 1 | 1 |
| [K].eTTFNSLLcPSGGEVSEELSLk.[L]      | N-Term(iTRAQ4plex); C9(Carbam  | 1 | 1 |
| [K].eTTFNSLLcPSGGEVSEELSLk.[L]      | N-Term(iTRAQ4plex); C9(Carbam  | 1 | 1 |
| [K].eTTFNSLLcPSGGEVSEELSLk.[L]      | N-Term(iTRAQ4plex); C9(Carbam  | 1 | 1 |
| [K].eTTFNSLLcPSGGEVSEELSLk.[L]      | N-Term(iTRAQ4plex); C9(Carbam  | 1 | 1 |
| [K].eTTFNSLLcPSGGEVSEELSLk.[L]      | N-Term(iTRAQ4plex); C9(Carbam  | 1 | 1 |
| [R].tEHPFTVEEFVLPk.[F]              | N-Term(iTRAQ4plex); K14(iTRAQ  | 1 | 1 |
| [R].tEHPFTVEEFVLPk.[F]              | N-Term(iTRAQ4plex); K14(iTRAQ  | 1 | 1 |

|                                     |                                |   |   |
|-------------------------------------|--------------------------------|---|---|
| [R].sLFTDLEAENDVLHcVAFVAVPk.[S]     | N-Term(iTRAQ4plex); C15(Carbar | 1 | 1 |
| [R].sLFTDLEAENDVLHcVAFVAVPk.[S]     | N-Term(iTRAQ4plex); C15(Carbar | 1 | 1 |
| [K].sSSNEEVMFLTVQVk.[G]             | N-Term(iTRAQ4plex); K15(iTRAQ  | 1 | 1 |
| [R].aVDQSVLLMkPDAELSASSVYNLLPEk.[D] | N-Term(iTRAQ4plex); K10(iTRAQ  | 1 | 1 |
| [R].aVDQSVLLMkPDAELSASSVYNLLPEk.[D] | N-Term(iTRAQ4plex); K10(iTRAQ  | 1 | 1 |
| [K].kLSFYYLIMAK.[G]                 | N-Term(iTRAQ4plex); K1(iTRAQ4  | 1 | 1 |
| [K].nEDSLVFVQTDk.[S]                | N-Term(iTRAQ4plex); K12(iTRAQ  | 1 | 1 |
| [R].iAQWQSFQLEGGLk.[Q]              | N-Term(iTRAQ4plex); K14(iTRAQ  | 1 | 1 |
| [K].IPPNVVEESAR.[A]                 | N-Term(iTRAQ4plex)             | 1 | 1 |
| [R].ILLQQVSLPELPGEYSmk.[V]          | N-Term(iTRAQ4plex); M17(Oxida  | 1 | 1 |
| [K].IPPNVVEESAR.[A]                 | N-Term(iTRAQ4plex)             | 1 | 1 |
| [R].kYSDASDcHGEDSQAFcEk.[F]         | N-Term(iTRAQ4plex); K1(iTRAQ4  | 1 | 1 |
| [K].IPPNVVEESAR.[A]                 | N-Term(iTRAQ4plex)             | 1 | 1 |
| [R].kYSDASDcHGEDSQAFcEk.[F]         | N-Term(iTRAQ4plex); K1(iTRAQ4  | 1 | 1 |
| [K].ISFYYLIMAK.[G]                  | N-Term(iTRAQ4plex); K10(iTRAQ  | 1 | 1 |
| [K].tAQEGDHGSHVYTk.[A]              | N-Term(iTRAQ4plex); K14(iTRAQ  | 1 | 1 |
| [K].tAQEGDHGSHVYTk.[A]              | N-Term(iTRAQ4plex); K14(iTRAQ  | 1 | 1 |
| [K].eQAPHcIcANGR.[Q]                | N-Term(iTRAQ4plex); C6(Carbam  | 1 | 1 |
| [R].ILLQQVSLPELPGEYSmk.[V]          | N-Term(iTRAQ4plex); K18(iTRAQ  | 1 | 1 |
| [K].eQAPHcIcANGR.[Q]                | N-Term(iTRAQ4plex); C6(Carbam  | 1 | 1 |
| [K].eQAPHcIcANGR.[Q]                | N-Term(iTRAQ4plex); C6(Carbam  | 1 | 1 |
| [R].ILLQQVSLPELPGEYSmk.[V]          | N-Term(iTRAQ4plex); K18(iTRAQ  | 1 | 1 |
| [K].dNSVHWERPQkPk.[A]               | N-Term(iTRAQ4plex); K11(iTRAQ  | 1 | 1 |
| [K].aGAFcLSEDAGLGISSTASLR.[A]       | N-Term(iTRAQ4plex); C5(Carbam  | 2 | 2 |
| [K].hYDGSYSTFGER.[Y]                | N-Term(iTRAQ4plex)             | 1 | 1 |
| [K].aGAFcLSEDAGLGISSTASLR.[A]       | N-Term(iTRAQ4plex); C5(Carbam  | 2 | 2 |
| [K].hYDGSYSTFGER.[Y]                | N-Term(iTRAQ4plex)             | 1 | 1 |
| [R].IVHVEEPHTETVR.[K]               | N-Term(iTRAQ4plex)             | 1 | 1 |
| [R].IVHVEEPHTETVR.[K]               | N-Term(iTRAQ4plex)             | 1 | 1 |
| [R].VSVQLEASPAFLAVPVEk.[E]          | K18(iTRAQ4plex)                | 1 | 1 |
| [R].LVHVEEPHTETVR.[K]               |                                | 1 | 1 |
| [K].YDVENcLANK.[V]                  | C6(Carbamidomethyl); K10(iTRA  | 1 | 1 |
| [K].yDVENcLANK.[V]                  | N-Term(iTRAQ4plex); C6(Carbam  | 1 | 1 |
| [K].IPPNVVEESAR.[A]                 | N-Term(iTRAQ4plex)             | 1 | 1 |
| [K].IPPNVVEESAR.[A]                 | N-Term(iTRAQ4plex)             | 1 | 1 |
| [R].sASNMAIVDVk.[M]                 | N-Term(iTRAQ4plex); K11(iTRAQ  | 1 | 1 |
| [K].sLNEEAVk.[K]                    | N-Term(iTRAQ4plex); K8(iTRAQ4  | 1 | 1 |
| [K].sLNEEAVk.[K]                    | N-Term(iTRAQ4plex); K8(iTRAQ4  | 1 | 1 |
| [K].sLNEEAVk.[K]                    | N-Term(iTRAQ4plex); K8(iTRAQ4  | 1 | 1 |
| [K].sLNEEAVk.[K]                    | N-Term(iTRAQ4plex); K8(iTRAQ4  | 1 | 1 |
| [K].aGAFcLSEDAGLGISSTASLR.[A]       | N-Term(iTRAQ4plex); C5(Carbam  | 2 | 2 |
| [K].mVSGFIPlkPTVv.[M]               | N-Term(iTRAQ4plex); K9(iTRAQ4  | 2 | 2 |
| [K].aGAFcLSEDAGLGISSTASLR.[A]       | N-Term(iTRAQ4plex); C5(Carbam  | 2 | 2 |
| [K].mVSGFIPlkPTVv.[M]               | N-Term(iTRAQ4plex); K9(iTRAQ4  | 2 | 2 |
| [R].hNVYINGITYTPVSSTNEk.[D]         | N-Term(iTRAQ4plex); K19(iTRAQ  | 1 | 1 |
| [K].vSNQTLsLFFTVLQDVPVR.[D]         | N-Term(iTRAQ4plex)             | 1 | 1 |
| [K].vSNQTLsLFFTVLQDVPVR.[D]         | N-Term(iTRAQ4plex)             | 1 | 1 |
| [K].IPPNVVEESAR.[A]                 | N-Term(iTRAQ4plex)             | 1 | 1 |
| [K].aPVGHFYEPQAPSAEVEMTSYVLLAYLTAQ  | N-Term(iTRAQ4plex); K46(iTRAQ  | 1 | 1 |
| [K].IPPNVVEESAR.[A]                 | N-Term(iTRAQ4plex)             | 1 | 1 |
| [K].IPPNVVEESAR.[A]                 | N-Term(iTRAQ4plex)             | 1 | 1 |
| [K].IPPNVVEESAR.[A]                 | N-Term(iTRAQ4plex)             | 1 | 1 |

|                                         |                                |   |   |
|-----------------------------------------|--------------------------------|---|---|
| [K].IPPNVVEESAR.[A]                     | N-Term(iTRAQ4plex)             | 1 | 1 |
| [R].aFQPFFVELTMPYSVIR.[G]               | N-Term(iTRAQ4plex)             | 2 | 2 |
| [R].aFQPFFVELTMPYSVIR.[G]               | N-Term(iTRAQ4plex)             | 2 | 2 |
| [R].vGFYESDVMGR.[G]                     | N-Term(iTRAQ4plex)             | 1 | 1 |
| [K].IHTEAQIQEEGTVVELTGR.[Q]             | N-Term(iTRAQ4plex)             | 1 | 1 |
| [K].IHTEAQIQEEGTVVELTGR.[Q]             | N-Term(iTRAQ4plex)             | 1 | 1 |
| [R].vVSMDENFHPLNELIPLVYIQDPk.[G]        | N-Term(iTRAQ4plex); K24(iTRAQ  | 1 | 1 |
| [K].gGVEDEVTL SAYITIALLEIPLTVTHPVVR.[N] | N-Term(iTRAQ4plex)             | 1 | 1 |
| [K].IHTEAQIQEEGTVVELTGR.[Q]             | N-Term(iTRAQ4plex)             | 1 | 1 |
| [K].aGAFcLSE DAGLGISSTASLR.[A]          | N-Term(iTRAQ4plex); C5(Carbam  | 2 | 2 |
| [K].IHTEAQIQEEGTVVELTGR.[Q]             | N-Term(iTRAQ4plex)             | 1 | 1 |
| [K].hYDGSYSTFGER.[Y]                    | N-Term(iTRAQ4plex)             | 1 | 1 |
| [K].tAQEGDHGSHVYTk.[A]                  | N-Term(iTRAQ4plex); K14(iTRAQ  | 1 | 1 |
| [K].tAQEGDHGSHVYTk.[A]                  | N-Term(iTRAQ4plex); K14(iTRAQ  | 1 | 1 |
| [K].sIYkPGQTVk.[F]                      | N-Term(iTRAQ4plex); K4(iTRAQ4  | 1 | 1 |
| [K].tAQEGDHGSHVYTk.[A]                  | N-Term(iTRAQ4plex); K14(iTRAQ  | 1 | 1 |
| [R].ILIYAVLPTGDVIGDSak.[Y]              | N-Term(iTRAQ4plex); K18(iTRAQ  | 1 | 1 |
| [K].ySDASDcHGEDSQAFcEk.[F]              | N-Term(iTRAQ4plex); C7(Carbam  | 1 | 1 |
| [K].ySDASDcHGEDSQAFcEk.[F]              | N-Term(iTRAQ4plex); C7(Carbam  | 1 | 1 |
| [K].ySDASDcHGEDSQAFcEk.[F]              | N-Term(iTRAQ4plex); C7(Carbam  | 1 | 1 |
| [R].ILIYAVLPTGDVIGDSak.[Y]              | N-Term(iTRAQ4plex); K18(iTRAQ  | 1 | 1 |
| [R].vVSMDENFHPLNELIPLVYIQDPk.[G]        | N-Term(iTRAQ4plex); K24(iTRAQ  | 1 | 1 |
| [R].ILIYAVLPTGDVIGDSak.[Y]              | N-Term(iTRAQ4plex); K18(iTRAQ  | 1 | 1 |
| [K].vTGEGcVYLQTSLk.[Y]                  | N-Term(iTRAQ4plex); C6(Carbam  | 1 | 1 |
| [K].IPPNVVEESAR.[A]                     | N-Term(iTRAQ4plex)             | 1 | 1 |
| [R].tEVSSNHVLIYLDk.[V]                  | N-Term(iTRAQ4plex); K14(iTRAQ  | 1 | 1 |
| [R].qTVSWAVTPk.[S]                      | N-Term(iTRAQ4plex); K10(iTRAQ  | 1 | 1 |
| [K].EQAPHcIcANGR.[Q]                    | C6(Carbamidomethyl); C8(Carba  | 1 | 1 |
| [R].qTVSWAVTPk.[S]                      | N-Term(iTRAQ4plex); K10(iTRAQ  | 1 | 1 |
| [K].aIGYLNTGYQR.[Q]                     | N-Term(iTRAQ4plex)             | 1 | 1 |
| [R].sSGSLLNNAIk.[G]                     | N-Term(iTRAQ4plex); K11(iTRAQ  | 2 | 2 |
| [R].sASNMAIVDvk.[M]                     | N-Term(iTRAQ4plex); K11(iTRAQ  | 1 | 1 |
| [R].aVDQSVLLMKPDAELSASSVYNLLPEk.[D]     | N-Term(iTRAQ4plex); K27(iTRAQ  | 1 | 1 |
| [K].IPPNVVEESAR.[A]                     | N-Term(iTRAQ4plex)             | 1 | 1 |
| [K].IHTEAQIQEEGTVVELTGR.[Q]             | N-Term(iTRAQ4plex)             | 1 | 1 |
| [R].tGTHGLLVk.[Q]                       | N-Term(iTRAQ4plex); K9(iTRAQ4  | 1 | 1 |
| [K].sDIAPVAR.[L]                        | N-Term(iTRAQ4plex)             | 1 | 1 |
| [R].vGFYESDVMGR.[G]                     | N-Term(iTRAQ4plex)             | 1 | 1 |
| [R].tGTHGLLVk.[Q]                       | N-Term(iTRAQ4plex); K9(iTRAQ4  | 1 | 1 |
| [R].tGTHGLLVk.[Q]                       | N-Term(iTRAQ4plex); K9(iTRAQ4  | 1 | 1 |
| [K].aAQVTIQSSGTFSSk.[F]                 | N-Term(iTRAQ4plex); K15(iTRAQ  | 1 | 1 |
| [K].IPPNVVEESAR.[A]                     | N-Term(iTRAQ4plex)             | 1 | 1 |
| [R].IVHVEEPHTETVRk.[Y]                  | N-Term(iTRAQ4plex); K14(iTRAQ  | 1 | 1 |
| [K].vTGEGcVYLQTSLk.[Y]                  | N-Term(iTRAQ4plex); C6(Carbam  | 1 | 1 |
| [R].tGTHGLLVk.[Q]                       | N-Term(iTRAQ4plex); K9(iTRAQ4  | 1 | 1 |
| [K].fSGQLNSHGcFYQVQvk.[T]               | N-Term(iTRAQ4plex); C10(Carbar | 1 | 1 |
| [K].YNILPEKEEFPFALGVQTLPQTcDEPk.[A]     | K7(iTRAQ4plex); C23(Carbamido  | 1 | 1 |
| [R].IVHVEEPHTETVR.[K]                   | N-Term(iTRAQ4plex)             | 1 | 1 |
| [R].sPcYGYQWVSEEHEEAHHTAYLVFSPSk.[S]    | N-Term(iTRAQ4plex); C3(Carbam  | 1 | 1 |
| [K].qFSFPLSSEPFQGSYk.[V]                | N-Term(iTRAQ4plex); K16(iTRAQ  | 1 | 1 |
| [K].sLNEEAVk.[K]                        | N-Term(iTRAQ4plex); K8(iTRAQ4  | 1 | 1 |
| [K].eQAPHcIcANGR.[Q]                    | N-Term(iTRAQ4plex); C6(Carbam  | 1 | 1 |

|                                |                                |   |   |
|--------------------------------|--------------------------------|---|---|
| [K].eQAPHcIcANGR.[Q]           | N-Term(iTRAQ4plex); C6(Carbam  | 1 | 1 |
| [R].qTVSWAVTPk.[S]             | N-Term(iTRAQ4plex); K10(iTRAQ  | 1 | 1 |
| [R].kYSDASDcHGEDSQAFcEk.[F]    | K1(iTRAQ4plex); C8(Carbamidon  | 1 | 1 |
| [R].kYSDASDcHGEDSQAFcEk.[F]    | N-Term(iTRAQ4plex); C8(Carbam  | 1 | 1 |
| [K].aTVLNLYLpk.[C]             | N-Term(iTRAQ4plex); K9(iTRAQ4  | 2 | 2 |
| [K].sLNEEAVk.[K]               | N-Term(iTRAQ4plex); K8(iTRAQ4  | 1 | 1 |
| [K].SIYkPGQTVk.[F]             | K4(iTRAQ4plex); K10(iTRAQ4ple  | 1 | 1 |
| [R].tGTHGLLVk.[Q]              | N-Term(iTRAQ4plex); K9(iTRAQ4  | 1 | 1 |
| [K].eTTFNSLLcPSGGEVSEELSLk.[L] | N-Term(iTRAQ4plex); C9(Carbam  | 1 | 1 |
| [K].hYDGSYSTFGER.[Y]           | N-Term(iTRAQ4plex)             | 1 | 1 |
| [K].ySDASDcHGEDSQAFcEk.[F]     | N-Term(iTRAQ4plex); C7(Carbam  | 1 | 1 |
| [R].dLkPAIVk.[V]               | N-Term(iTRAQ4plex); K3(iTRAQ4  | 1 | 1 |
| [K].IHTEAQIQEEGTVELTGR.[Q]     | N-Term(iTRAQ4plex)             | 1 | 1 |
| [K].IPPNVVEESAR.[A]            | N-Term(iTRAQ4plex)             | 1 | 1 |
| [K].aAQVTIQSSGTFSSk.[F]        | N-Term(iTRAQ4plex); K15(iTRAQ  | 1 | 1 |
| [R].IVHVEEPHTETVR.[K]          | N-Term(iTRAQ4plex)             | 1 | 1 |
| [K].IPPNVVEESAR.[A]            | N-Term(iTRAQ4plex)             | 1 | 1 |
| [R].sSGSLLNNAIk.[G]            | N-Term(iTRAQ4plex); K11(iTRAQ  | 2 | 2 |
| [R].dLkPAIVk.[V]               | N-Term(iTRAQ4plex); K3(iTRAQ4  | 1 | 1 |
| [K].AIGYLNTGYQR.[Q]            |                                | 1 | 1 |
| [K].aAQVTIQSSGTFSSk.[F]        | N-Term(iTRAQ4plex); K15(iTRAQ  | 1 | 1 |
| [R].gEAFTLk.[A]                | N-Term(iTRAQ4plex); K7(iTRAQ4  | 1 | 1 |
| [R].dLkPAIVk.[V]               | N-Term(iTRAQ4plex); K3(iTRAQ4  | 1 | 1 |
| [K].ySDASDcHGEDSQAFcEk.[F]     | N-Term(iTRAQ4plex); C7(Carbam  | 1 | 1 |
| [K].mVSGFIPLkPTVk.[M]          | N-Term(iTRAQ4plex); K9(iTRAQ4  | 2 | 2 |
| [K].mcPQLQQYEmHGPEGLR.[V]      | N-Term(iTRAQ4plex); C2(Carbam  | 1 | 1 |
| [K].IHTEAQIQEEGTVELTGR.[Q]     | N-Term(iTRAQ4plex)             | 1 | 1 |
| [K].aAQVTIQSSGTFSSk.[F]        | N-Term(iTRAQ4plex); K15(iTRAQ  | 1 | 1 |
| [R].sSGSLLNNAIk.[G]            | N-Term(iTRAQ4plex); K11(iTRAQ  | 2 | 2 |
| [R].TGTHGLLVk.[Q]              | K9(iTRAQ4plex)                 | 1 | 1 |
| [K].sLNEEAVk.[K]               | N-Term(iTRAQ4plex); K8(iTRAQ4  | 1 | 1 |
| [R].tGTHGLLVk.[Q]              | N-Term(iTRAQ4plex); K9(iTRAQ4  | 1 | 1 |
| [R].nALFcLESAWk.[T]            | N-Term(iTRAQ4plex); C5(Carbam  | 1 | 1 |
| [R].kDTVikPLLVEPEGLEk.[E]      | N-Term(iTRAQ4plex); K1(iTRAQ4  | 1 | 1 |
| [K].IPPNVVEESAR.[A]            | N-Term(iTRAQ4plex)             | 1 | 1 |
| [K].sIYkPGQTVk.[F]             | N-Term(iTRAQ4plex); K4(iTRAQ4  | 1 | 1 |
| [R].tEHPFTVEEFVLpk.[F]         | N-Term(iTRAQ4plex); K14(iTRAQ  | 1 | 1 |
| [K].aAQVTIQSSGTFSSk.[F]        | N-Term(iTRAQ4plex); K15(iTRAQ  | 1 | 1 |
| [K].IPPNVVEESAR.[A]            | N-Term(iTRAQ4plex)             | 1 | 1 |
| [K].sssNEEVMFLTVQVk.[G]        | N-Term(iTRAQ4plex); K15(iTRAQ  | 1 | 1 |
| [K].mcPQLQQYEMHGPEGLR.[V]      | N-Term(iTRAQ4plex); M1(Oxidati | 1 | 1 |
| [R].sSGSLLNNAIk.[G]            | N-Term(iTRAQ4plex); K11(iTRAQ  | 2 | 2 |
| [K].aAQVTIQSSGTFSSk.[F]        | N-Term(iTRAQ4plex); K15(iTRAQ  | 1 | 1 |
| [K].vYDYETDEFAIAEYNAPcSk.[D]   | N-Term(iTRAQ4plex); C19(Carbar | 1 | 1 |
| [R].tEVSSNHVLIYLDk.[V]         | N-Term(iTRAQ4plex); K14(iTRAQ  | 1 | 1 |
| [R].vGFYESDVMGR.[G]            | N-Term(iTRAQ4plex)             | 1 | 1 |
| [R].vTAAPQSVcALR.[A]           | N-Term(iTRAQ4plex); C9(Carbam  | 1 | 1 |
| [K].yDVENcLANK.[V]             | N-Term(iTRAQ4plex); C6(Carbam  | 1 | 1 |
| [K].aTVLNLYLpk.[C]             | N-Term(iTRAQ4plex); K9(iTRAQ4  | 2 | 2 |
| [K].IPPNVVEESAR.[A]            | N-Term(iTRAQ4plex)             | 1 | 1 |
| [R].iAQWQSFQLEGGLk.[Q]         | N-Term(iTRAQ4plex); K14(iTRAQ  | 1 | 1 |
| [K].yDVENcLANK.[V]             | N-Term(iTRAQ4plex); C6(Carbam  | 1 | 1 |

|                                |                                |   |   |
|--------------------------------|--------------------------------|---|---|
| [K].IHTEAQIQEEGTVVELTGR.[Q]    | N-Term(iTRAQ4plex)             | 1 | 1 |
| [R].dLkPAIVk.[V]               | N-Term(iTRAQ4plex); K3(iTRAQ4  | 1 | 1 |
| [K].LPPNVVEESAR.[A]            |                                | 1 | 1 |
| [K].eEFPFALGVQTLPQTcDEPk.[A]   | N-Term(iTRAQ4plex); C16(Carbar | 1 | 1 |
| [K].GHFSISIPVk.[S]             | K10(iTRAQ4plex)                | 1 | 1 |
| [K].fSGLNSHGcFYQQVv.[T]        | N-Term(iTRAQ4plex); C10(Carbar | 1 | 1 |
| [R].sASNMAIVDVk.[M]            | N-Term(iTRAQ4plex); K11(iTRAQ  | 1 | 1 |
| [K].sDIAPVAR.[L]               | N-Term(iTRAQ4plex)             | 1 | 1 |
| [R].tEVSSNHVLIYLDk.[V]         | N-Term(iTRAQ4plex); K14(iTRAQ  | 1 | 1 |
| [K].tAQEGDHGSHVYTk.[A]         | N-Term(iTRAQ4plex); K14(iTRAQ  | 1 | 1 |
| [K].IHTEAQIQEEGTVVELTGR.[Q]    | N-Term(iTRAQ4plex)             | 1 | 1 |
| [R].SASNMAIVDVk.[M]            | K11(iTRAQ4plex)                | 1 | 1 |
| [K].ySDASDcHGEDSQAFcEk.[F]     | N-Term(iTRAQ4plex); C7(Carbam  | 1 | 1 |
| [K].aTVLNLYLpk.[C]             | N-Term(iTRAQ4plex); K9(iTRAQ4  | 2 | 2 |
| [K].SLNEEAVk.[K]               | K8(iTRAQ4plex)                 | 1 | 1 |
| [K].fQVDNNNR.[L]               | N-Term(iTRAQ4plex)             | 1 | 1 |
| [K].vTGEGcVYLQTSk.[Y]          | N-Term(iTRAQ4plex); C6(Carbam  | 1 | 1 |
| [K].aAQVTIQSSGTFSSk.[F]        | N-Term(iTRAQ4plex); K15(iTRAQ  | 1 | 1 |
| [K].ySDASDcHGEDSQAFcEk.[F]     | N-Term(iTRAQ4plex); C7(Carbam  | 1 | 1 |
| [K].TAQEGDHGSHVYTk.[A]         | K14(iTRAQ4plex)                | 1 | 1 |
| [K].IPPNVVEESAR.[A]            | N-Term(iTRAQ4plex)             | 1 | 1 |
| [K].vDLSFSPSQSLPASHAHLR.[V]    | N-Term(iTRAQ4plex)             | 1 | 1 |
| [R].tEHPFTVEEFVLPk.[F]         | N-Term(iTRAQ4plex); K14(iTRAQ  | 1 | 1 |
| [K].sLNEEAVk.[K]               | N-Term(iTRAQ4plex); K8(iTRAQ4  | 1 | 1 |
| [K].EQAPHcIcANGR.[Q]           | C6(Carbamidomethyl); C8(Carba  | 1 | 1 |
| [R].tEVSSNHVLIYLDk.[V]         | N-Term(iTRAQ4plex); K14(iTRAQ  | 1 | 1 |
| [K].sIYkPGQTVk.[F]             | N-Term(iTRAQ4plex); K4(iTRAQ4  | 1 | 1 |
| [K].qQNAQGGSSTQDVTVALHALSk.[Y] | N-Term(iTRAQ4plex); K23(iTRAQ  | 1 | 1 |
| [K].aAQVTIQSSGTFSSk.[F]        | N-Term(iTRAQ4plex); K15(iTRAQ  | 1 | 1 |
| [K].vTGEGcVYLQTSk.[Y]          | N-Term(iTRAQ4plex); C6(Carbam  | 1 | 1 |
| [K].fSGLNSHGcFYQQVv.[T]        | N-Term(iTRAQ4plex); C10(Carbar | 1 | 1 |
| [K].LPPNVVEESAR.[A]            |                                | 1 | 1 |
| [R].LVHVEEPHTETVR.[K]          |                                | 1 | 1 |
| [K].dTVIkPLLVEPEGLEk.[E]       | N-Term(iTRAQ4plex); K5(iTRAQ4  | 1 | 1 |
| [K].vDLSFSPSQSLPASHAHLR.[V]    | N-Term(iTRAQ4plex)             | 1 | 1 |
| [K].hYDGSYSTFGER.[Y]           | N-Term(iTRAQ4plex)             | 1 | 1 |
| [K].fQVDNNNR.[L]               | N-Term(iTRAQ4plex)             | 1 | 1 |
| [K].sSSNEEVMFLTVQVv.[G]        | N-Term(iTRAQ4plex); K15(iTRAQ  | 1 | 1 |
| [R].vGFYESDVMGR.[G]            | N-Term(iTRAQ4plex)             | 1 | 1 |
| [R].sASNMAIVDVk.[M]            | N-Term(iTRAQ4plex); K11(iTRAQ  | 1 | 1 |
| [K].IHTEAQIQEEGTVVELTGR.[Q]    | N-Term(iTRAQ4plex)             | 1 | 1 |
| [K].mcPQLQQYEmHGPEGLR.[V]      | N-Term(iTRAQ4plex); C2(Carbam  | 1 | 1 |
| [K].nEDSLVFVQTDk.[S]           | N-Term(iTRAQ4plex); K12(iTRAQ  | 1 | 1 |
| [K].gQGTLSVVTMYHAK.[A]         | N-Term(iTRAQ4plex); K14(iTRAQ  | 1 | 1 |
| [K].gLEVTITAR.[F]              | N-Term(iTRAQ4plex)             | 1 | 1 |
| [R].tVmVNIENPEGIPVv.[Q]        | N-Term(iTRAQ4plex); M3(Oxidati | 1 | 1 |
| [R].tVmVNIENPEGIPVv.[Q]        | N-Term(iTRAQ4plex); M3(Oxidati | 1 | 1 |
| [K].aGDFLEANYmNLQR.[S]         | N-Term(iTRAQ4plex); M10(Oxida  | 1 | 1 |
| [R].tVmVNIENPEGIPVv.[Q]        | N-Term(iTRAQ4plex); M3(Oxidati | 1 | 1 |
| [K].ISINTHPSQkPLSITVR.[T]      | N-Term(iTRAQ4plex); K10(iTRAQ  | 1 | 1 |
| [R].tVmVNIENPEGIPVv.[Q]        | N-Term(iTRAQ4plex); M3(Oxidati | 1 | 1 |
| [K].aGDFLEANYmNLQR.[S]         | N-Term(iTRAQ4plex); M10(Oxida  | 1 | 1 |

|                                 |                                          |   |   |
|---------------------------------|------------------------------------------|---|---|
| [K].LSINTHPSQkPLSITVR.[T]       | K10(iTRAQ4plex)                          | 1 | 1 |
| [K].LSINTHPSQkPLSITVR.[T]       | K10(iTRAQ4plex)                          | 1 | 1 |
| [K].ISINTHPSQkPLSITVR.[T]       | N-Term(iTRAQ4plex); K10(iTRAQ4plex)      | 1 | 1 |
| [R].tVmVNIENPEGIPVv.[Q]         | N-Term(iTRAQ4plex); M3(Oxidation)        | 1 | 1 |
| [K].AGDFLEANYMNLQR.[S]          |                                          | 1 | 1 |
| [R].vPVAVQGEDTVQSLTQGDGVAK.[L]  | N-Term(iTRAQ4plex)                       | 1 | 1 |
| [R].vPVAVQGEDTVQSLTQGDGVAK.[L]  | N-Term(iTRAQ4plex); K22(iTRAQ4plex)      | 1 | 1 |
| [K].AGDFLEANYMNLQR.[S]          |                                          | 1 | 1 |
| [K].dAPDHQELNLDVSLQLPSR.[S]     | N-Term(iTRAQ4plex)                       | 1 | 1 |
| [K].dFDFVPPVVR.[W]              | N-Term(iTRAQ4plex)                       | 1 | 1 |
| [R].iLLQGTPVAQmTEDAVDAER.[L]    | N-Term(iTRAQ4plex); M11(Oxidation)       | 1 | 1 |
| [R].iLLQGTPVAQmTEDAVDAER.[L]    | N-Term(iTRAQ4plex); M11(Oxidation)       | 1 | 1 |
| [R].iLLQGTPVAQmTEDAVDAER.[L]    | N-Term(iTRAQ4plex); M11(Oxidation)       | 1 | 1 |
| [R].eVVADSVWVDVv.[D]            | N-Term(iTRAQ4plex); K12(iTRAQ4plex)      | 1 | 1 |
| [R].eVVADSVWVDVv.[D]            | N-Term(iTRAQ4plex); K12(iTRAQ4plex)      | 1 | 1 |
| [K].qkPDGVFQEDAPVIHQEMIGGLR.[N] | N-Term(iTRAQ4plex); K2(iTRAQ4plex)       | 1 | 1 |
| [R].tVMVNIENPEGIPVv.[Q]         | N-Term(iTRAQ4plex); K15(iTRAQ4plex)      | 1 | 1 |
| [R].tVMVNIENPEGIPVv.[Q]         | N-Term(iTRAQ4plex); K15(iTRAQ4plex)      | 1 | 1 |
| [R].tVMVNIENPEGIPVv.[Q]         | N-Term(iTRAQ4plex); K15(iTRAQ4plex)      | 1 | 1 |
| [R].tVMVNIENPEGIPVv.[Q]         | N-Term(iTRAQ4plex); K15(iTRAQ4plex)      | 1 | 1 |
| [K].qkPDGVFQEDAPVIHQEMIGGLR.[N] | N-Term(iTRAQ4plex)                       | 1 | 1 |
| [K].QkPDGVFQEDAPVIHQEMIGGLR.[N] | K2(iTRAQ4plex)                           | 1 | 1 |
| [K].qkPDGVFQEDAPVIHQEMIGGLR.[N] | N-Term(iTRAQ4plex)                       | 1 | 1 |
| [K].QkPDGVFQEDAPVIHQEMIGGLR.[N] | K2(iTRAQ4plex)                           | 1 | 1 |
| [R].tVMVNIENPEGIPVv.[Q]         | N-Term(iTRAQ4plex); K15(iTRAQ4plex)      | 1 | 1 |
| [K].qkPDGVFQEDAPVIHQEMIGGLR.[N] | N-Term(iTRAQ4plex); K2(iTRAQ4plex)       | 1 | 1 |
| [K].qkPDGVFQEDAPVIHQEMIGGLR.[N] | N-Term(iTRAQ4plex); K2(iTRAQ4plex)       | 1 | 1 |
| [K].qkPDGVFQEDAPVIHQEMIGGLR.[N] | N-Term(iTRAQ4plex)                       | 1 | 1 |
| [K].QkPDGVFQEDAPVIHQEMIGGLR.[N] | K2(iTRAQ4plex)                           | 1 | 1 |
| [K].qkPDGVFQEDAPVIHQEMIGGLR.[N] | N-Term(iTRAQ4plex); K2(iTRAQ4plex)       | 1 | 1 |
| [K].qkPDGVFQEDAPVIHQEmIGGLR.[N] | N-Term(iTRAQ4plex); K2(iTRAQ4plex)       | 1 | 1 |
| [K].TIYTPGSTVLYR.[I]            |                                          | 1 | 1 |
| [K].TIYTPGSTVLYR.[I]            |                                          | 1 | 1 |
| [K].ISINTHPSQkPLSITVR.[T]       | N-Term(iTRAQ4plex); K10(iTRAQ4plex)      | 1 | 1 |
| [K].ISINTHPSQkPLSITVR.[T]       | N-Term(iTRAQ4plex); K10(iTRAQ4plex)      | 1 | 1 |
| [K].ISINTHPSQkPLSITVR.[T]       | N-Term(iTRAQ4plex); K10(iTRAQ4plex)      | 1 | 1 |
| [K].ISINTHPSQkPLSITVR.[T]       | N-Term(iTRAQ4plex); K10(iTRAQ4plex)      | 1 | 1 |
| [K].ISINTHPSQkPLSITVR.[T]       | N-Term(iTRAQ4plex); K10(iTRAQ4plex)      | 1 | 1 |
| [R].IHWESASLLR.[S]              |                                          | 1 | 1 |
| [K].rPQDAkNTMILEIcTR.[Y]        | N-Term(iTRAQ4plex); K6(iTRAQ4plex)       | 1 | 1 |
| [K].rPQDAkNTMILEIcTR.[Y]        | N-Term(iTRAQ4plex); K6(iTRAQ4plex)       | 1 | 1 |
| [K].vYAYYNLEEScTR.[F]           | N-Term(iTRAQ4plex); C11(Carbamidomethyl) | 1 | 1 |
| [R].IFTVNHkLLPVGR.[T]           | K7(iTRAQ4plex)                           | 1 | 1 |
| [K].vYAYYNLEEScTR.[F]           | N-Term(iTRAQ4plex); C11(Carbamidomethyl) | 1 | 1 |
| [K].rPQDAkNTMILEIcTR.[Y]        | N-Term(iTRAQ4plex); K6(iTRAQ4plex)       | 1 | 1 |
| [K].ISINTHPSQkPLSITVR.[T]       | N-Term(iTRAQ4plex); K10(iTRAQ4plex)      | 1 | 1 |
| [K].vYAYYNLEEScTR.[F]           | N-Term(iTRAQ4plex); C11(Carbamidomethyl) | 1 | 1 |
| [K].vYAYYNLEEScTR.[F]           | N-Term(iTRAQ4plex); C11(Carbamidomethyl) | 1 | 1 |
| [K].VSHSEDDcLAFk.[V]            | C8(Carbamidomethyl); K12(iTRAQ4plex)     | 1 | 1 |
| [R].kVLLDGVQNPV.[A]             | N-Term(iTRAQ4plex); K1(iTRAQ4plex)       | 1 | 1 |
| [K].kGYTQQLAFR.[Q]              | N-Term(iTRAQ4plex); K1(iTRAQ4plex)       | 1 | 1 |
| [K].kGYTQQLAFR.[Q]              | N-Term(iTRAQ4plex); K1(iTRAQ4plex)       | 1 | 1 |







|                                 |                               |   |   |
|---------------------------------|-------------------------------|---|---|
| [K].vLLDGVQNPR.[A]              | N-Term(iTRAQ4plex)            | 1 | 1 |
| [K].gYTQQLAFR.[Q]               | N-Term(iTRAQ4plex)            | 1 | 1 |
| [R].vVLVAVDk.[G]                | K8(iTRAQ4plex)                | 1 | 1 |
| [K].rQGALELIk.[K]               | N-Term(iTRAQ4plex); K9(iTRAQ4 | 1 | 1 |
| [R].iHWESASLLR.[S]              | N-Term(iTRAQ4plex)            | 1 | 1 |
| [K].rQGALELIk.[K]               | N-Term(iTRAQ4plex); K9(iTRAQ4 | 1 | 1 |
| [R].iHWESASLLR.[S]              | N-Term(iTRAQ4plex)            | 1 | 1 |
| [R].qPVPGGQQMTLk.[I]            | N-Term(iTRAQ4plex); K11(iTRAQ | 1 | 1 |
| [R].qPVPGGQQMTLk.[I]            | N-Term(iTRAQ4plex); K11(iTRAQ | 1 | 1 |
| [K].gQGTLSVVTmYHAK.[A]          | N-Term(iTRAQ4plex); M10(Oxida | 1 | 1 |
| [R].qPVPGGQQMTLk.[I]            | N-Term(iTRAQ4plex); K11(iTRAQ | 1 | 1 |
| [R].qPVPGGQQMTLk.[I]            | N-Term(iTRAQ4plex); K11(iTRAQ | 1 | 1 |
| [K].gQGTLSVVTmYHAK.[A]          | N-Term(iTRAQ4plex); M10(Oxida | 1 | 1 |
| [K].aAVYHHFISDGV.R.[K]          | N-Term(iTRAQ4plex)            | 1 | 1 |
| [K].gYTQQLAFR.[Q]               | N-Term(iTRAQ4plex)            | 1 | 1 |
| [R].vVLVAVDk.[G]                | N-Term(iTRAQ4plex); K8(iTRAQ4 | 1 | 1 |
| [K].ISINTHPSQkPLSITVR.[T]       | N-Term(iTRAQ4plex); K10(iTRAQ | 1 | 1 |
| [K].ISINTHPSQkPLSITVR.[T]       | N-Term(iTRAQ4plex); K10(iTRAQ | 1 | 1 |
| [K].ISINTHPSQkPLSITVR.[T]       | N-Term(iTRAQ4plex); K10(iTRAQ | 1 | 1 |
| [K].gLEVTITAR.[F]               | N-Term(iTRAQ4plex)            | 1 | 1 |
| [K].gLEVTITAR.[F]               | N-Term(iTRAQ4plex)            | 1 | 1 |
| [K].vLLDGVQNPR.[A]              | N-Term(iTRAQ4plex)            | 1 | 1 |
| [K].gLEVTITAR.[F]               | N-Term(iTRAQ4plex)            | 1 | 1 |
| [K].gLEVTITAR.[F]               | N-Term(iTRAQ4plex)            | 1 | 1 |
| [R].iHWESASLLR.[S]              | N-Term(iTRAQ4plex)            | 1 | 1 |
| [R].iHWESASLLR.[S]              | N-Term(iTRAQ4plex)            | 1 | 1 |
| [R].rHQQVTIPPk.[S]              | N-Term(iTRAQ4plex); K11(iTRAQ | 1 | 1 |
| [R].iHWESASLLR.[S]              | N-Term(iTRAQ4plex)            | 1 | 1 |
| [R].rHQQVTIPPk.[S]              | N-Term(iTRAQ4plex); K11(iTRAQ | 1 | 1 |
| [R].rHQQVTIPPk.[S]              | N-Term(iTRAQ4plex); K11(iTRAQ | 1 | 1 |
| [R].rHQQVTIPPk.[S]              | N-Term(iTRAQ4plex); K11(iTRAQ | 1 | 1 |
| [K].sGSDEVQVGQQR.[T]            | N-Term(iTRAQ4plex)            | 1 | 1 |
| [R].rHQQVTIPPk.[S]              | N-Term(iTRAQ4plex); K11(iTRAQ | 1 | 1 |
| [R].iHWESASLLR.[S]              | N-Term(iTRAQ4plex)            | 1 | 1 |
| [R].iHWESASLLR.[S]              | N-Term(iTRAQ4plex)            | 1 | 1 |
| [R].iHWESASLLR.[S]              | N-Term(iTRAQ4plex)            | 1 | 1 |
| [K].kLVLSSEK.[T]                | N-Term(iTRAQ4plex); K1(iTRAQ4 | 1 | 1 |
| [R].hQQQVTIPPk.[S]              | N-Term(iTRAQ4plex); K10(iTRAQ | 1 | 1 |
| [R].hQQQVTIPPk.[S]              | N-Term(iTRAQ4plex); K10(iTRAQ | 1 | 1 |
| [K].kQELSEAEQATR.[T]            | N-Term(iTRAQ4plex); K1(iTRAQ4 | 1 | 1 |
| [R].hQQQVTIPPk.[S]              | N-Term(iTRAQ4plex); K10(iTRAQ | 1 | 1 |
| [R].rHQQVTIPPk.[S]              | N-Term(iTRAQ4plex); K11(iTRAQ | 1 | 1 |
| [R].hQQQVTIPPk.[S]              | N-Term(iTRAQ4plex); K10(iTRAQ | 1 | 1 |
| [R].hQQQVTIPPk.[S]              | N-Term(iTRAQ4plex); K10(iTRAQ | 1 | 1 |
| [R].hQQQVTIPPk.[S]              | N-Term(iTRAQ4plex); K10(iTRAQ | 1 | 1 |
| [R].hQQQVTIPPk.[S]              | N-Term(iTRAQ4plex); K10(iTRAQ | 1 | 1 |
| [R].hQQQVTIPPk.[S]              | N-Term(iTRAQ4plex); K10(iTRAQ | 1 | 1 |
| [R].hQQQVTIPPk.[S]              | N-Term(iTRAQ4plex); K10(iTRAQ | 1 | 1 |
| [K].kLVLSSEK.[T]                | N-Term(iTRAQ4plex); K1(iTRAQ4 | 1 | 1 |
| [K].kVEGTAFFVIFGIQDGEQR.[I]     | N-Term(iTRAQ4plex); K1(iTRAQ4 | 1 | 1 |
| [K].dYAGVFS DAGLFTSSSGQQAQR.[A] | N-Term(iTRAQ4plex)            | 1 | 1 |
| [K].fVTVQATFGTQVVEK.[V]         | N-Term(iTRAQ4plex); K15(iTRAQ | 1 | 1 |
| [K].kVEGTAFFVIFGIQDGEQR.[I]     | N-Term(iTRAQ4plex); K1(iTRAQ4 | 1 | 1 |

|                                    |                               |   |   |
|------------------------------------|-------------------------------|---|---|
| [R].vVLVAVDk.[G]                   | N-Term(iTRAQ4plex); K8(iTRAQ4 | 1 | 1 |
| [K].kVEGTAFVIFGIQDGEQR.[I]         | N-Term(iTRAQ4plex); K1(iTRAQ4 | 1 | 1 |
| [K].dYAGVFSDAGLTFTSSSGQQAQR.[A]    | N-Term(iTRAQ4plex)            | 1 | 1 |
| [R].iSLPEslkR.[I]                  | N-Term(iTRAQ4plex); K8(iTRAQ4 | 1 | 1 |
| [K].kVEGTAFVIFGIQDGEQR.[I]         | N-Term(iTRAQ4plex); K1(iTRAQ4 | 1 | 1 |
| [K].kVEGTAFVIFGIQDGEQR.[I]         | N-Term(iTRAQ4plex); K1(iTRAQ4 | 1 | 1 |
| [K].dYAGVFSDAGLTFTSSSGQQAQR.[A]    | N-Term(iTRAQ4plex)            | 1 | 1 |
| [K].gQGTLsvvTMYHak.[A]             | N-Term(iTRAQ4plex); K14(iTRAQ | 1 | 1 |
| [K].gQGTLsvvTMYHak.[A]             | N-Term(iTRAQ4plex); K14(iTRAQ | 1 | 1 |
| [K].kVEGTAFVIFGIQDGEQR.[I]         | N-Term(iTRAQ4plex); K1(iTRAQ4 | 1 | 1 |
| [R].iHWESASLLR.[S]                 | N-Term(iTRAQ4plex)            | 1 | 1 |
| [K].kVEGTAFVIFGIQDGEQR.[I]         | N-Term(iTRAQ4plex); K1(iTRAQ4 | 1 | 1 |
| [K].aAVYHHFISDGVR.[K]              | N-Term(iTRAQ4plex)            | 1 | 1 |
| [K].kVEGTAFVIFGIQDGEQR.[I]         | N-Term(iTRAQ4plex); K1(iTRAQ4 | 1 | 1 |
| [R].iHWESASLLR.[S]                 | N-Term(iTRAQ4plex)            | 1 | 1 |
| [K].aAVYHHFISDGVR.[K]              | N-Term(iTRAQ4plex)            | 1 | 1 |
| [K].kVEGTAFVIFGIQDGEQR.[I]         | N-Term(iTRAQ4plex); K1(iTRAQ4 | 1 | 1 |
| [K].kVEGTAFVIFGIQDGEQR.[I]         | N-Term(iTRAQ4plex); K1(iTRAQ4 | 1 | 1 |
| [K].dYAGVFSDAGLTFTSSSGQQAQR.[A]    | N-Term(iTRAQ4plex)            | 1 | 1 |
| [K].kVEGTAFVIFGIQDGEQR.[I]         | N-Term(iTRAQ4plex); K1(iTRAQ4 | 1 | 1 |
| [K].kVEGTAFVIFGIQDGEQR.[I]         | N-Term(iTRAQ4plex); K1(iTRAQ4 | 1 | 1 |
| [K].kVEGTAFVIFGIQDGEQR.[I]         | N-Term(iTRAQ4plex); K1(iTRAQ4 | 1 | 1 |
| [K].vEGTAFVIFGIQDGEQR.[I]          | N-Term(iTRAQ4plex)            | 1 | 1 |
| [K].fVTVQATFGTQVVEk.[V]            | N-Term(iTRAQ4plex); K15(iTRAQ | 1 | 1 |
| [K].kVEGTAFVIFGIQDGEQR.[I]         | N-Term(iTRAQ4plex); K1(iTRAQ4 | 1 | 1 |
| [K].vEGTAFVIFGIQDGEQR.[I]          | N-Term(iTRAQ4plex)            | 1 | 1 |
| [K].dYAGVFSDAGLTFTSSSGQQAQR.[A]    | N-Term(iTRAQ4plex)            | 1 | 1 |
| [K].fVTVQATFGTQVVEk.[V]            | N-Term(iTRAQ4plex); K15(iTRAQ | 1 | 1 |
| [K].vEGTAFVIFGIQDGEQR.[I]          | N-Term(iTRAQ4plex)            | 1 | 1 |
| [K].fVTVQATFGTQVVEk.[V]            | N-Term(iTRAQ4plex); K15(iTRAQ | 1 | 1 |
| [K].dYAGVFSDAGLTFTSSSGQQAQR.[A]    | N-Term(iTRAQ4plex)            | 1 | 1 |
| [K].kVEGTAFVIFGIQDGEQR.[I]         | N-Term(iTRAQ4plex); K1(iTRAQ4 | 1 | 1 |
| [R].sEFPEswLWNVEDLk.[E]            | N-Term(iTRAQ4plex); K15(iTRAQ | 1 | 1 |
| [K].dSITTWEILAVSMSDk.[K]           | N-Term(iTRAQ4plex); K16(iTRAQ | 1 | 1 |
| [K].dSITTWEILAVSMSDk.[K]           | N-Term(iTRAQ4plex); K16(iTRAQ | 1 | 1 |
| [R].sEFPEswLWNVEDLk.[E]            | K15(iTRAQ4plex)               | 1 | 1 |
| [R].sEFPEswLWNVEDLk.[E]            | N-Term(iTRAQ4plex); K15(iTRAQ | 1 | 1 |
| [R].gDQDATMSILDISmMTGFAPDTDDLk.[Q] | N-Term(iTRAQ4plex); M14(Oxida | 1 | 1 |
| [K].fVTVQATFGTQVVEk.[V]            | N-Term(iTRAQ4plex); K15(iTRAQ | 1 | 1 |
| [K].dYAGVFSDAGLTFTSSSGQQAQR.[A]    | N-Term(iTRAQ4plex)            | 1 | 1 |
| [R].gDQDATMSILDISmMTGFAPDTDDLk.[Q] | N-Term(iTRAQ4plex); K26(iTRAQ | 1 | 1 |
| [K].QcQDLGAFTESMvVFGcPN.[-]        | C2(Carbamidomethyl); C17(Carb | 1 | 1 |
| [K].qcQDLGAFTESMvVFGcPN.[-]        | N-Term(iTRAQ4plex); C2(Carbam | 1 | 1 |
| [K].qcQDLGAFTESMvVFGcPN.[-]        | N-Term(iTRAQ4plex); C2(Carbam | 1 | 1 |
| [K].DSITTWEILAVSMSDk.[K]           | K16(iTRAQ4plex)               | 1 | 1 |
| [R].gDQDATMSILDISmMTGFAPDTDDLk.[Q] | N-Term(iTRAQ4plex); M15(Oxida | 1 | 1 |
| [R].gDQDATMSILDISmMTGFAPDTDDLk.[Q] | N-Term(iTRAQ4plex); M14(Oxida | 1 | 1 |
| [R].gDQDATMSILDISmMTGFAPDTDDLk.[Q] | N-Term(iTRAQ4plex); M15(Oxida | 1 | 1 |
| [K].kVEGTAFVIFGIQDGEQR.[I]         | N-Term(iTRAQ4plex); K1(iTRAQ4 | 1 | 1 |
| [K].vEGTAFVIFGIQDGEQR.[I]          | N-Term(iTRAQ4plex)            | 1 | 1 |
| [K].kVEGTAFVIFGIQDGEQR.[I]         | N-Term(iTRAQ4plex); K1(iTRAQ4 | 1 | 1 |
| [K].vEGTAFVIFGIQDGEQR.[I]          | N-Term(iTRAQ4plex)            | 1 | 1 |

|                                  |                               |   |   |
|----------------------------------|-------------------------------|---|---|
| [K].kVEGTAFVIFGIQDGEQR.[I]       | N-Term(iTRAQ4plex); K1(iTRAQ4 | 1 | 1 |
| [K].gQGTLNVVTmYHak.[A]           | N-Term(iTRAQ4plex); M10(Oxida | 1 | 1 |
| [K].aAVYHHFISDGVR.[K]            | N-Term(iTRAQ4plex)            | 1 | 1 |
| [K].aAVYHHFISDGVR.[K]            | N-Term(iTRAQ4plex)            | 1 | 1 |
| [K].vEGTAFVIFGIQDGEQR.[I]        | N-Term(iTRAQ4plex)            | 1 | 1 |
| [K].aAVYHHFISDGVR.[K]            | N-Term(iTRAQ4plex)            | 1 | 1 |
| [K].kVEGTAFVIFGIQDGEQR.[I]       | N-Term(iTRAQ4plex); K1(iTRAQ4 | 1 | 1 |
| [K].dYAGVFS DAGLTFTSSSGQQAQR.[A] | N-Term(iTRAQ4plex)            | 1 | 1 |
| [K].kVEGTAFVIFGIQDGEQR.[I]       | N-Term(iTRAQ4plex); K1(iTRAQ4 | 1 | 1 |
| [K].dYAGVFS DAGLTFTSSSGQQAQR.[A] | N-Term(iTRAQ4plex)            | 1 | 1 |
| [K].aAVYHHFISDGVR.[K]            | N-Term(iTRAQ4plex)            | 1 | 1 |
| [K].kVEGTAFVIFGIQDGEQR.[I]       | N-Term(iTRAQ4plex); K1(iTRAQ4 | 1 | 1 |
| [K].vEGTAFVIFGIQDGEQR.[I]        | N-Term(iTRAQ4plex)            | 1 | 1 |
| [K].dYAGVFS DAGLTFTSSSGQQAQR.[A] | N-Term(iTRAQ4plex)            | 1 | 1 |
| [K].aAVYHHFISDGVR.[K]            | N-Term(iTRAQ4plex)            | 1 | 1 |
| [K].aAVYHHFISDGVR.[K]            | N-Term(iTRAQ4plex)            | 1 | 1 |
| [K].gVFLNkk.[N]                  | N-Term(iTRAQ4plex); K7(iTRAQ4 | 1 | 1 |
| [K].aAVYHHFISDGVR.[K]            | N-Term(iTRAQ4plex)            | 1 | 1 |
| [R].lkGPLLNk.[F]                 | N-Term(iTRAQ4plex); K2(iTRAQ4 | 1 | 1 |
| [K].kVEGTAFVIFGIQDGEQR.[I]       | N-Term(iTRAQ4plex); K1(iTRAQ4 | 1 | 1 |
| [K].kGYTQQLAFR.[Q]               | N-Term(iTRAQ4plex); K1(iTRAQ4 | 1 | 1 |
| [K].vEGTAFVIFGIQDGEQR.[I]        | N-Term(iTRAQ4plex)            | 1 | 1 |
| [K].dYAGVFS DAGLTFTSSSGQQAQR.[A] | N-Term(iTRAQ4plex)            | 1 | 1 |
| [K].aAVYHHFISDGVR.[K]            | N-Term(iTRAQ4plex)            | 1 | 1 |
| [K].aAVYHHFISDGVR.[K]            | N-Term(iTRAQ4plex)            | 1 | 1 |
| [K].aAVYHHFISDGVR.[K]            | N-Term(iTRAQ4plex)            | 1 | 1 |
| [K].aAVYHHFISDGVR.[K]            | N-Term(iTRAQ4plex)            | 1 | 1 |
| [K].aAVYHHFISDGVR.[K]            | N-Term(iTRAQ4plex)            | 1 | 1 |
| [K].aAVYHHFISDGVR.[K]            | N-Term(iTRAQ4plex)            | 1 | 1 |
| [K].aAVYHHFISDGVR.[K]            | N-Term(iTRAQ4plex)            | 1 | 1 |
| [K].vEGTAFVIFGIQDGEQR.[I]        | N-Term(iTRAQ4plex)            | 1 | 1 |
| [K].aAVYHHFISDGVR.[K]            | N-Term(iTRAQ4plex)            | 1 | 1 |
| [K].aAVYHHFISDGVR.[K]            | N-Term(iTRAQ4plex)            | 1 | 1 |
| [K].aAVYHHFISDGVR.[K]            | N-Term(iTRAQ4plex)            | 1 | 1 |
| [K].aAVYHHFISDGVR.[K]            | N-Term(iTRAQ4plex)            | 1 | 1 |
| [K].aAVYHHFISDGVR.[K]            | N-Term(iTRAQ4plex)            | 1 | 1 |
| [K].aAVYHHFISDGVR.[K]            | N-Term(iTRAQ4plex)            | 1 | 1 |
| [K].aAVYHHFISDGVR.[K]            | N-Term(iTRAQ4plex)            | 1 | 1 |
| [K].kVEGTAFVIFGIQDGEQR.[I]       | N-Term(iTRAQ4plex); K1(iTRAQ4 | 1 | 1 |
| [K].aAVYHHFISDGVR.[K]            | N-Term(iTRAQ4plex)            | 1 | 1 |
| [K].kVEGTAFVIFGIQDGEQR.[I]       | N-Term(iTRAQ4plex); K1(iTRAQ4 | 1 | 1 |
| [K].fVTVQATFGTQVVEk.[V]          | N-Term(iTRAQ4plex); K15(iTRAQ | 1 | 1 |
| [K].kVEGTAFVIFGIQDGEQR.[I]       | N-Term(iTRAQ4plex); K1(iTRAQ4 | 1 | 1 |
| [K].dYAGVFS DAGLTFTSSSGQQAQR.[A] | N-Term(iTRAQ4plex)            | 1 | 1 |
| [K].vFLDccNYITELR.[R]            | N-Term(iTRAQ4plex); C5(Carbam | 1 | 1 |
| [R].nTLIIYLDk.[V]                | N-Term(iTRAQ4plex); K9(iTRAQ4 | 1 | 1 |
| [K].vFLDccNYITELR.[R]            | N-Term(iTRAQ4plex); C5(Carbam | 1 | 1 |
| [K].kVEGTAFVIFGIQDGEQR.[I]       | N-Term(iTRAQ4plex); K1(iTRAQ4 | 1 | 1 |
| [K].fVTVQATFGTQVVEk.[V]          | N-Term(iTRAQ4plex); K15(iTRAQ | 1 | 1 |
| [K].kVEGTAFVIFGIQDGEQR.[I]       | N-Term(iTRAQ4plex); K1(iTRAQ4 | 1 | 1 |
| [K].fVTVQATFGTQVVEk.[V]          | N-Term(iTRAQ4plex); K15(iTRAQ | 1 | 1 |
| [K].fVTVQATFGTQVVEk.[V]          | N-Term(iTRAQ4plex); K15(iTRAQ | 1 | 1 |
| [K].kVEGTAFVIFGIQDGEQR.[I]       | N-Term(iTRAQ4plex); K1(iTRAQ4 | 1 | 1 |

|                                    |                               |   |   |
|------------------------------------|-------------------------------|---|---|
| [K].vFLDccNYITELR.[R]              | N-Term(iTRAQ4plex); C5(Carbam | 1 | 1 |
| [K].kVEGTAFVIFGIQDGEQR.[I]         | N-Term(iTRAQ4plex); K1(iTRAQ4 | 1 | 1 |
| [K].kVEGTAFVIFGIQDGEQR.[I]         | N-Term(iTRAQ4plex); K1(iTRAQ4 | 1 | 1 |
| [K].vFLDccNYITELR.[R]              | N-Term(iTRAQ4plex); C5(Carbam | 1 | 1 |
| [K].dYAGVFS DAGLTFTSSSGQQT AQR.[A] | N-Term(iTRAQ4plex)            | 1 | 1 |
| [K].dYAGVFS DAGLTFTSSSGQQT AQR.[A] | N-Term(iTRAQ4plex)            | 1 | 1 |
| [K].dYAGVFS DAGLTFTSSSGQQT AQR.[A] | N-Term(iTRAQ4plex)            | 1 | 1 |
| [K].dYAGVFS DAGLTFTSSSGQQT AQR.[A] | N-Term(iTRAQ4plex)            | 1 | 1 |
| [K].fVTVQATFGTQVVEk.[V]            | N-Term(iTRAQ4plex); K15(iTRAQ | 1 | 1 |
| [K].kvFLDccNYITELR.[R]             | N-Term(iTRAQ4plex); K1(iTRAQ4 | 1 | 1 |
| [K].VHQYFNVELIQPGAVk.[V]           | K16(iTRAQ4plex)               | 1 | 1 |
| [K].kvFLDccNYITELR.[R]             | N-Term(iTRAQ4plex); K1(iTRAQ4 | 1 | 1 |
| [K].kvFLDccNYITELR.[R]             | N-Term(iTRAQ4plex); K1(iTRAQ4 | 1 | 1 |
| [K].dYAGVFS DAGLTFTSSSGQQT AQR.[A] | N-Term(iTRAQ4plex)            | 1 | 1 |
| [K].kvFLDccNYITELR.[R]             | N-Term(iTRAQ4plex); K1(iTRAQ4 | 1 | 1 |
| [K].dYAGVFS DAGLTFTSSSGQQT AQR.[A] | N-Term(iTRAQ4plex)            | 1 | 1 |
| [K].kvFLDccNYITELR.[R]             | N-Term(iTRAQ4plex); K1(iTRAQ4 | 1 | 1 |
| [K].vFLDccNYITELR.[R]              | N-Term(iTRAQ4plex); C5(Carbam | 1 | 1 |
| [K].kVEGTAFVIFGIQDGEQR.[I]         | N-Term(iTRAQ4plex); K1(iTRAQ4 | 1 | 1 |
| [K].fVTVQATFGTQVVEk.[V]            | N-Term(iTRAQ4plex); K15(iTRAQ | 1 | 1 |
| [K].fVTVQATFGTQVVEk.[V]            | N-Term(iTRAQ4plex); K15(iTRAQ | 1 | 1 |
| [K].kVEGTAFVIFGIQDGEQR.[I]         | N-Term(iTRAQ4plex); K1(iTRAQ4 | 1 | 1 |
| [K].fVTVQATFGTQVVEk.[V]            | N-Term(iTRAQ4plex); K15(iTRAQ | 1 | 1 |
| [K].kVEGTAFVIFGIQDGEQR.[I]         | N-Term(iTRAQ4plex); K1(iTRAQ4 | 1 | 1 |
| [K].kVEGTAFVIFGIQDGEQR.[I]         | N-Term(iTRAQ4plex); K1(iTRAQ4 | 1 | 1 |
| [K].fVTVQATFGTQVVEk.[V]            | N-Term(iTRAQ4plex); K15(iTRAQ | 1 | 1 |
| [K].kVEGTAFVIFGIQDGEQR.[I]         | N-Term(iTRAQ4plex); K1(iTRAQ4 | 1 | 1 |
| [K].kVEGTAFVIFGIQDGEQR.[I]         | N-Term(iTRAQ4plex); K1(iTRAQ4 | 1 | 1 |
| [K].fVTVQATFGTQVVEk.[V]            | N-Term(iTRAQ4plex); K15(iTRAQ | 1 | 1 |
| [K].kVEGTAFVIFGIQDGEQR.[I]         | N-Term(iTRAQ4plex); K1(iTRAQ4 | 1 | 1 |
| [K].fVTVQATFGTQVVEk.[V]            | N-Term(iTRAQ4plex); K15(iTRAQ | 1 | 1 |
| [K].kVEGTAFVIFGIQDGEQR.[I]         | N-Term(iTRAQ4plex); K1(iTRAQ4 | 1 | 1 |
| [K].kVEGTAFVIFGIQDGEQR.[I]         | N-Term(iTRAQ4plex); K1(iTRAQ4 | 1 | 1 |
| [K].fVTVQATFGTQVVEk.[V]            | N-Term(iTRAQ4plex); K15(iTRAQ | 1 | 1 |
| [K].kVEGTAFVIFGIQDGEQR.[I]         | N-Term(iTRAQ4plex); K1(iTRAQ4 | 1 | 1 |
| [K].fVTVQATFGTQVVEk.[V]            | N-Term(iTRAQ4plex); K15(iTRAQ | 1 | 1 |
| [K].fVTVQATFGTQVVEk.[V]            | N-Term(iTRAQ4plex); K15(iTRAQ | 1 | 1 |
| [K].kVEGTAFVIFGIQDGEQR.[I]         | N-Term(iTRAQ4plex); K1(iTRAQ4 | 1 | 1 |
| [K].fVTVQATFGTQVVEk.[V]            | N-Term(iTRAQ4plex); K15(iTRAQ | 1 | 1 |
| [K].fVTVQATFGTQVVEk.[V]            | N-Term(iTRAQ4plex); K15(iTRAQ | 1 | 1 |
| [K].kVEGTAFVIFGIQDGEQR.[I]         | N-Term(iTRAQ4plex); K1(iTRAQ4 | 1 | 1 |
| [K].fVTVQATFGTQVVEk.[V]            | N-Term(iTRAQ4plex); K15(iTRAQ | 1 | 1 |
| [K].fVTVQATFGTQVVEk.[V]            | N-Term(iTRAQ4plex); K15(iTRAQ | 1 | 1 |
| [K].kVEGTAFVIFGIQDGEQR.[I]         | N-Term(iTRAQ4plex); K1(iTRAQ4 | 1 | 1 |
| [K].fVTVQATFGTQVVEk.[V]            | N-Term(iTRAQ4plex); K15(iTRAQ | 1 | 1 |
| [K].fVTVQATFGTQVVEk.[V]            | N-Term(iTRAQ4plex); K15(iTRAQ | 1 | 1 |
| [R].sGIPVTS PYQIHFTk.[T]           | N-Term(iTRAQ4plex); K16(iTRAQ | 1 | 1 |

|                                     |                                |   |   |
|-------------------------------------|--------------------------------|---|---|
| [K].kVEGTAFVIFGIQDGEQR.[I]          | N-Term(iTRAQ4plex); K1(iTRAQ4  | 1 | 1 |
| [K].kVEGTAFVIFGIQDGEQR.[I]          | N-Term(iTRAQ4plex); K1(iTRAQ4  | 1 | 1 |
| [K].kVEGTAFVIFGIQDGEQR.[I]          | N-Term(iTRAQ4plex); K1(iTRAQ4  | 1 | 1 |
| [K].fVTVQATFGTQVVEk.[V]             | N-Term(iTRAQ4plex); K15(iTRAQ  | 1 | 1 |
| [K].kVEGTAFVIFGIQDGEQR.[I]          | N-Term(iTRAQ4plex); K1(iTRAQ4  | 1 | 1 |
| [K].kVEGTAFVIFGIQDGEQR.[I]          | N-Term(iTRAQ4plex); K1(iTRAQ4  | 1 | 1 |
| [K].fVTVQATFGTQVVEk.[V]             | N-Term(iTRAQ4plex); K15(iTRAQ  | 1 | 1 |
| [K].kVEGTAFVIFGIQDGEQR.[I]          | N-Term(iTRAQ4plex); K1(iTRAQ4  | 1 | 1 |
| [K].kVEGTAFVIFGIQDGEQR.[I]          | N-Term(iTRAQ4plex); K1(iTRAQ4  | 1 | 1 |
| [K].fVTVQATFGTQVVEk.[V]             | N-Term(iTRAQ4plex); K15(iTRAQ  | 1 | 1 |
| [K].kVEGTAFVIFGIQDGEQR.[I]          | N-Term(iTRAQ4plex); K1(iTRAQ4  | 1 | 1 |
| [K].fVTVQATFGTQVVEk.[V]             | N-Term(iTRAQ4plex); K15(iTRAQ  | 1 | 1 |
| [K].kVEGTAFVIFGIQDGEQR.[I]          | N-Term(iTRAQ4plex); K1(iTRAQ4  | 1 | 1 |
| [K].kVEGTAFVIFGIQDGEQR.[I]          | N-Term(iTRAQ4plex); K1(iTRAQ4  | 1 | 1 |
| [K].fVTVQATFGTQVVEk.[V]             | N-Term(iTRAQ4plex); K15(iTRAQ  | 1 | 1 |
| [K].kVEGTAFVIFGIQDGEQR.[I]          | N-Term(iTRAQ4plex); K1(iTRAQ4  | 1 | 1 |
| [K].kVEGTAFVIFGIQDGEQR.[I]          | N-Term(iTRAQ4plex); K1(iTRAQ4  | 1 | 1 |
| [K].fVTVQATFGTQVVEk.[V]             | N-Term(iTRAQ4plex); K15(iTRAQ  | 1 | 1 |
| [K].dYAGVFS DAGLTFTSSSGQQT AQR.[A]  | N-Term(iTRAQ4plex)             | 1 | 1 |
| [R].qPSSAFAAFV k.[R]                | N-Term(iTRAQ4plex); K11(iTRAQ  | 1 | 1 |
| [R].qPSSAFAAFV k.[R]                | N-Term(iTRAQ4plex); K11(iTRAQ  | 1 | 1 |
| [R].qPSSAFAAFV k.[R]                | N-Term(iTRAQ4plex); K11(iTRAQ  | 1 | 1 |
| [R].qPSSAFAAFV k.[R]                | N-Term(iTRAQ4plex); K11(iTRAQ  | 1 | 1 |
| [K].kVEGTAFVIFGIQDGEQR.[I]          | N-Term(iTRAQ4plex); K1(iTRAQ4  | 1 | 1 |
| [K].kVEGTAFVIFGIQDGEQR.[I]          | N-Term(iTRAQ4plex); K1(iTRAQ4  | 1 | 1 |
| [K].kVEGTAFVIFGIQDGEQR.[I]          | N-Term(iTRAQ4plex); K1(iTRAQ4  | 1 | 1 |
| [R].iSLPEsLk.[R]                    | N-Term(iTRAQ4plex); K8(iTRAQ4  | 1 | 1 |
| [R].qPSSAFAAFV k.[R]                | N-Term(iTRAQ4plex); K11(iTRAQ  | 1 | 1 |
| [K].fYYIYNEk.[G]                    | N-Term(iTRAQ4plex); K8(iTRAQ4  | 1 | 1 |
| [K].tIYTPGSTVLYR.[I]                | N-Term(iTRAQ4plex)             | 1 | 1 |
| [K].kVEGTAFVIFGIQDGEQR.[I]          | N-Term(iTRAQ4plex); K1(iTRAQ4  | 1 | 1 |
| [K].fVTVQATFGTQVVEk.[V]             | N-Term(iTRAQ4plex); K15(iTRAQ  | 1 | 1 |
| [K].dYAGVFS DAGLTFTSSSGQQT AQR.[A]  | N-Term(iTRAQ4plex)             | 1 | 1 |
| [K].dYAGVFS DAGLTFTSSSGQQT AQR.[A]  | N-Term(iTRAQ4plex)             | 1 | 1 |
| [K].kVEGTAFVIFGIQDGEQR.[I]          | N-Term(iTRAQ4plex); K1(iTRAQ4  | 1 | 1 |
| [K].dYAGVFS DAGLTFTSSSGQQT AQR.[A]  | N-Term(iTRAQ4plex)             | 1 | 1 |
| [K].kVEGTAFVIFGIQDGEQR.[I]          | N-Term(iTRAQ4plex); K1(iTRAQ4  | 1 | 1 |
| [K].dYAGVFS DAGLTFTSSSGQQT AQR.[A]  | N-Term(iTRAQ4plex)             | 1 | 1 |
| [R].yTYLImNk.[G]                    | N-Term(iTRAQ4plex); M7(Oxidati | 1 | 1 |
| [K].dYAGVFS DAGLTFTSSSGQQT AQR.[A]  | N-Term(iTRAQ4plex)             | 1 | 1 |
| [K].kVEGTAFVIFGIQDGEQR.[I]          | N-Term(iTRAQ4plex); K1(iTRAQ4  | 1 | 1 |
| [R].YYTYLIMNk.[G]                   | K9(iTRAQ4plex)                 | 1 | 1 |
| [K].dYAGVFS DAGLTFTSSSGQQT AQR.[A]  | N-Term(iTRAQ4plex)             | 1 | 1 |
| [K].kVEGTAFVIFGIQDGEQR.[I]          | N-Term(iTRAQ4plex); K1(iTRAQ4  | 1 | 1 |
| [K].kVEGTAFVIFGIQDGEQR.[I]          | N-Term(iTRAQ4plex); K1(iTRAQ4  | 1 | 1 |
| [R].VELLHNPAFcSLATtk.[R]            | C10(Carbamidomethyl); K16(iTR  | 1 | 1 |
| [K].dYAGVFS DAGLTFTSSSGQQT AQR.[A]  | N-Term(iTRAQ4plex)             | 1 | 1 |
| [K].kVEGTAFVIFGIQDGEQR.[I]          | N-Term(iTRAQ4plex); K1(iTRAQ4  | 1 | 1 |
| [K].kVEGTAFVIFGIQDGEQR.[I]          | N-Term(iTRAQ4plex); K1(iTRAQ4  | 1 | 1 |
| [R].VELLHNPAFcSLATtk.[R]            | C10(Carbamidomethyl); K16(iTR  | 1 | 1 |
| [K].dYAGVFS DAGLTFTSSSGQQT AQR.[A]  | N-Term(iTRAQ4plex)             | 1 | 1 |
| [K].kVEGTAFVIFGIQDGEQR.[I]          | N-Term(iTRAQ4plex); K1(iTRAQ4  | 1 | 1 |
| [K].vQLSND FDEYIMAIEQTIk.[S]        | N-Term(iTRAQ4plex); K19(iTRAQ  | 1 | 1 |
| [K].nTMILEIcTR.[Y]                  | N-Term(iTRAQ4plex); C8(Carbam  | 1 | 1 |
| [R].gDQDATMSILDISM MTGFAPDTDDLk.[Q] | N-Term(iTRAQ4plex); K26(iTRAQ  | 1 | 1 |

|                                   |                                |   |   |
|-----------------------------------|--------------------------------|---|---|
| [K].vQLSNDFDEYImAIEQTIk.[S]       | N-Term(iTRAQ4plex); M12(Oxida  | 1 | 1 |
| [K].qcQDLGAFTESMVFgCPN.[-]        | N-Term(iTRAQ4plex); C2(Carbam  | 1 | 1 |
| [K].qcQDLGAFTESMVFgCPN.[-]        | N-Term(iTRAQ4plex); C2(Carbam  | 1 | 1 |
| [K].vQLSNDFDEYIMAIEQTIk.[S]       | N-Term(iTRAQ4plex); K19(iTRAQ  | 1 | 1 |
| [K].tiYTPGSTVLYR.[I]              | N-Term(iTRAQ4plex)             | 1 | 1 |
| [K].tiYTPGSTVLYR.[I]              | N-Term(iTRAQ4plex)             | 1 | 1 |
| [K].tiYTPGSTVLYR.[I]              | N-Term(iTRAQ4plex)             | 1 | 1 |
| [K].fYIYNEk.[G]                   | N-Term(iTRAQ4plex); K8(iTRAQ4  | 1 | 1 |
| [K].nTMILEIcTR.[Y]                | N-Term(iTRAQ4plex); C8(Carbam  | 1 | 1 |
| [K].nTMILEIcTR.[Y]                | N-Term(iTRAQ4plex); C8(Carbam  | 1 | 1 |
| [K].nTMILEIcTR.[Y]                | N-Term(iTRAQ4plex); C8(Carbam  | 1 | 1 |
| [K].nTMILEIcTR.[Y]                | N-Term(iTRAQ4plex); C8(Carbam  | 1 | 1 |
| [K].qkPDGVFQEDAPVIHQEmIGGLR.[N]   | N-Term(iTRAQ4plex); K2(iTRAQ4  | 1 | 1 |
| [K].qkPDGVFQEDAPVIHQEmIGGLR.[N]   | N-Term(iTRAQ4plex); K2(iTRAQ4  | 1 | 1 |
| [R].yRGDQDATMSILDISMMTGfAPDTDDLk. | N-Term(iTRAQ4plex); K28(iTRAQ  | 1 | 1 |
| [K].dSITTWEILAVSMSdk.[K]          | N-Term(iTRAQ4plex); K16(iTRAQ  | 1 | 1 |
| [K].qkPDGVFQEDAPVIHQEmIGGLR.[N]   | N-Term(iTRAQ4plex); K2(iTRAQ4  | 1 | 1 |
| [K].qkPDGVFQEDAPVIHQEmIGGLR.[N]   | N-Term(iTRAQ4plex); K2(iTRAQ4  | 1 | 1 |
| [K].qkPDGVFQEDAPVIHQEmIGGLR.[N]   | N-Term(iTRAQ4plex); K2(iTRAQ4  | 1 | 1 |
| [R].NTLIIYLDk.[V]                 | K9(iTRAQ4plex)                 | 1 | 1 |
| [R].fYHPEkEDGk.[L]                | N-Term(iTRAQ4plex); K6(iTRAQ4  | 1 | 1 |
| [K].aGDFLEANYmNLQR.[S]            | N-Term(iTRAQ4plex); M10(Oxida  | 1 | 1 |
| [K].aGDFLEANYmNLQR.[S]            | N-Term(iTRAQ4plex); M10(Oxida  | 1 | 1 |
| [R].tkkQELSEAEQATR.[T]            | N-Term(iTRAQ4plex); K3(iTRAQ4  | 1 | 1 |
| [R].tkkQELSEAEQATR.[T]            | N-Term(iTRAQ4plex); K2(iTRAQ4  | 1 | 1 |
| [K].gQGTLsvVTMYHAK.[A]            | N-Term(iTRAQ4plex); K14(iTRAQ  | 1 | 1 |
| [R].tkkQELSEAEQATR.[T]            | N-Term(iTRAQ4plex); K3(iTRAQ4  | 1 | 1 |
| [R].TkkQELSEAEQATR.[T]            | K2(iTRAQ4plex); K3(iTRAQ4plex) | 1 | 1 |
| [K].gQGTLsvVTMYHAK.[A]            | N-Term(iTRAQ4plex); K14(iTRAQ  | 1 | 1 |
| [R].TkkQELSEAEQATR.[T]            | K2(iTRAQ4plex); K3(iTRAQ4plex) | 1 | 1 |
| [K].gQGTLsvVTMYHAK.[A]            | N-Term(iTRAQ4plex); K14(iTRAQ  | 1 | 1 |
| [K].gQGTLsvVTMYHAK.[A]            | N-Term(iTRAQ4plex); K14(iTRAQ  | 1 | 1 |
| [R].TkkQELSEAEQATR.[T]            | K2(iTRAQ4plex); K3(iTRAQ4plex) | 1 | 1 |
| [R].fISLGEAck.[K]                 | N-Term(iTRAQ4plex); C8(Carbam  | 1 | 1 |
| [R].tkkQELSEAEQATR.[T]            | N-Term(iTRAQ4plex); K2(iTRAQ4  | 1 | 1 |
| [R].tkkQELSEAEQATR.[T]            | N-Term(iTRAQ4plex); K2(iTRAQ4  | 1 | 1 |
| [R].FISLGEAck.[K]                 | C8(Carbamidomethyl); K9(iTRAC  | 1 | 1 |
| [K].gYTQQLAFR.[Q]                 | N-Term(iTRAQ4plex)             | 1 | 1 |
| [K].vLLDGvQNPR.[A]                | N-Term(iTRAQ4plex)             | 1 | 1 |
| [K].vLLDGvQNPR.[A]                | N-Term(iTRAQ4plex)             | 1 | 1 |
| [K].vLLDGvQNPR.[A]                | N-Term(iTRAQ4plex)             | 1 | 1 |
| [R].fYHPEkEDGk.[L]                | N-Term(iTRAQ4plex); K6(iTRAQ4  | 1 | 1 |
| [R].fISLGEAck.[K]                 | N-Term(iTRAQ4plex); C8(Carbam  | 1 | 1 |
| [K].SGSDEVQVgQQR.[T]              |                                | 1 | 1 |
| [R].fISLGEAck.[K]                 | N-Term(iTRAQ4plex); C8(Carbam  | 1 | 1 |
| [R].vVLVAVDk.[G]                  | N-Term(iTRAQ4plex); K8(iTRAQ4  | 1 | 1 |
| [R].vVLVAVDk.[G]                  | N-Term(iTRAQ4plex); K8(iTRAQ4  | 1 | 1 |
| [R].vVLVAVDk.[G]                  | N-Term(iTRAQ4plex); K8(iTRAQ4  | 1 | 1 |
| [K].rIPIEDGSgeVVLsr.[K]           | N-Term(iTRAQ4plex)             | 1 | 1 |
| [R].vVLVAVDk.[G]                  | N-Term(iTRAQ4plex); K8(iTRAQ4  | 1 | 1 |
| [R].vVLVAVDk.[G]                  | N-Term(iTRAQ4plex); K8(iTRAQ4  | 1 | 1 |
| [R].fISLGEAck.[K]                 | N-Term(iTRAQ4plex); C8(Carbam  | 1 | 1 |



|                                 |                               |   |   |
|---------------------------------|-------------------------------|---|---|
| [R].vVLVAVDk.[G]                | N-Term(iTRAQ4plex); K8(iTRAQ4 | 1 | 1 |
| [R].vVLVAVDk.[G]                | N-Term(iTRAQ4plex); K8(iTRAQ4 | 1 | 1 |
| [R].vVLVAVDk.[G]                | N-Term(iTRAQ4plex); K8(iTRAQ4 | 1 | 1 |
| [K].qkPDGVFQEDAPVIHQEMIGGLR.[N] | N-Term(iTRAQ4plex); K2(iTRAQ4 | 1 | 1 |
| [K].qkPDGVFQEDAPVIHQEMIGGLR.[N] | N-Term(iTRAQ4plex); K2(iTRAQ4 | 1 | 1 |
| [K].qkPDGVFQEDAPVIHQEMIGGLR.[N] | N-Term(iTRAQ4plex); K2(iTRAQ4 | 1 | 1 |
| [K].dYAGVFSDAGLTFTSSSGQQTAR.[A] | N-Term(iTRAQ4plex)            | 1 | 1 |
| [K].kVEGTAFVIFGIQDGEQR.[I]      | N-Term(iTRAQ4plex); K1(iTRAQ4 | 1 | 1 |
| [K].kVEGTAFVIFGIQDGEQR.[I]      | N-Term(iTRAQ4plex); K1(iTRAQ4 | 1 | 1 |
| [K].kVEGTAFVIFGIQDGEQR.[I]      | N-Term(iTRAQ4plex); K1(iTRAQ4 | 1 | 1 |
| [K].dYAGVFSDAGLTFTSSSGQQTAR.[A] | N-Term(iTRAQ4plex)            | 1 | 1 |
| [K].kVEGTAFVIFGIQDGEQR.[I]      | N-Term(iTRAQ4plex); K1(iTRAQ4 | 1 | 1 |
| [K].fVTVQATFGTQVVEK.[V]         | N-Term(iTRAQ4plex); K15(iTRAQ | 1 | 1 |
| [K].dSITTWEILAVSmSDk.[K]        | N-Term(iTRAQ4plex); M13(Oxida | 1 | 1 |
| [K].dSITTWEILAVSmSDk.[G]        | N-Term(iTRAQ4plex); K16(iTRAQ | 1 | 1 |
| [R].iLLQGTPVAQMTEDAVER.[L]      | N-Term(iTRAQ4plex)            | 1 | 1 |
| [K].dSITTWEILAVSmSDk.[K]        | N-Term(iTRAQ4plex); M13(Oxida | 1 | 1 |
| [R].sEFPEswLWNVEDLkEPPk.[N]     | N-Term(iTRAQ4plex); K15(iTRAQ | 1 | 1 |
| [R].sEFPEswLWNVEDLkEPPk.[N]     | N-Term(iTRAQ4plex); K15(iTRAQ | 1 | 1 |
| [K].DYAGVFSDAGLTFTSSSGQQTAR.[A] |                               | 1 | 1 |
| [R].sEFPEswLWNVEDLkEPPk.[N]     | N-Term(iTRAQ4plex); K15(iTRAQ | 1 | 1 |
| [K].dYAGVFSDAGLTFTSSSGQQTAR.[A] | N-Term(iTRAQ4plex)            | 1 | 1 |
| [K].kVEGTAFVIFGIQDGEQR.[I]      | N-Term(iTRAQ4plex); K1(iTRAQ4 | 1 | 1 |
| [K].kVEGTAFVIFGIQDGEQR.[I]      | N-Term(iTRAQ4plex); K1(iTRAQ4 | 1 | 1 |
| [R].iLLQGTPVAQMTEDAVER.[L]      | N-Term(iTRAQ4plex)            | 1 | 1 |
| [R].iLLQGTPVAQMTEDAVER.[L]      | N-Term(iTRAQ4plex)            | 1 | 1 |
| [R].iLLQGTPVAQMTEDAVER.[L]      | N-Term(iTRAQ4plex)            | 1 | 1 |
| [K].kVEGTAFVIFGIQDGEQR.[I]      | N-Term(iTRAQ4plex); K1(iTRAQ4 | 1 | 1 |
| [K].kVEGTAFVIFGIQDGEQR.[I]      | N-Term(iTRAQ4plex); K1(iTRAQ4 | 1 | 1 |
| [K].vEGTAFVIFGIQDGEQR.[I]       | N-Term(iTRAQ4plex)            | 1 | 1 |
| [K].eYVLPSFEVIVEPTEK.[F]        | N-Term(iTRAQ4plex); K16(iTRAQ | 1 | 1 |
| [K].fVTVQATFGTQVVEK.[V]         | N-Term(iTRAQ4plex); K15(iTRAQ | 1 | 1 |
| [R].iLLQGTPVAQMTEDAVER.[L]      | N-Term(iTRAQ4plex)            | 1 | 1 |
| [R].iLLQGTPVAQMTEDAVER.[L]      | N-Term(iTRAQ4plex)            | 1 | 1 |
| [R].iLLQGTPVAQMTEDAVER.[L]      | N-Term(iTRAQ4plex)            | 1 | 1 |
| [R].iLLQGTPVAQmTEDEVER.[L]      | N-Term(iTRAQ4plex); M11(Oxida | 1 | 1 |
| [R].iLLQGTPVAQmTEDEVER.[L]      | N-Term(iTRAQ4plex); M11(Oxida | 1 | 1 |
| [R].nTLIIYLDk.[V]               | N-Term(iTRAQ4plex); K9(iTRAQ4 | 1 | 1 |
| [K].qkPDGVFQEDAPVIHQEMIGGLR.[N] | N-Term(iTRAQ4plex); K2(iTRAQ4 | 1 | 1 |
| [K].qkPDGVFQEDAPVIHQEMIGGLR.[N] | N-Term(iTRAQ4plex); K2(iTRAQ4 | 1 | 1 |
| [K].qkPDGVFQEDAPVIHQEMIGGLR.[N] | N-Term(iTRAQ4plex); K2(iTRAQ4 | 1 | 1 |
| [R].nTLIIYLDk.[V]               | N-Term(iTRAQ4plex); K9(iTRAQ4 | 1 | 1 |
| [R].nTLIIYLDk.[V]               | N-Term(iTRAQ4plex); K9(iTRAQ4 | 1 | 1 |
| [R].nTLIIYLDk.[V]               | N-Term(iTRAQ4plex); K9(iTRAQ4 | 1 | 1 |
| [K].dYAGVFSDAGLTFTSSSGQQTAR.[A] | N-Term(iTRAQ4plex)            | 1 | 1 |
| [K].dFDVPPVVR.[W]               | N-Term(iTRAQ4plex)            | 1 | 1 |
| [K].aGDFLEANYMNLQR.[S]          | N-Term(iTRAQ4plex)            | 1 | 1 |
| [K].VFLDccNYITELR.[R]           | C5(Carbamidomethyl); C6(Carba | 1 | 1 |
| [K].dYAGVFSDAGLTFTSSSGQQTAR.[A] | N-Term(iTRAQ4plex)            | 1 | 1 |
| [K].kVEGTAFVIFGIQDGEQR.[I]      | N-Term(iTRAQ4plex); K1(iTRAQ4 | 1 | 1 |
| [K].aGDFLEANYMNLQR.[S]          | N-Term(iTRAQ4plex)            | 1 | 1 |
| [K].aGDFLEANYMNLQR.[S]          | N-Term(iTRAQ4plex)            | 1 | 1 |

|                                   |                                |   |   |
|-----------------------------------|--------------------------------|---|---|
| [K].kVEGTAFVIFGIQDGEQR.[I]        | N-Term(iTRAQ4plex); K1(iTRAQ4  | 1 | 1 |
| [K].kQELSEAEQATR.[T]              | N-Term(iTRAQ4plex); K1(iTRAQ4  | 1 | 1 |
| [K].sLYVSATVILHSGSDMVQAER.[S]     | N-Term(iTRAQ4plex)             | 1 | 1 |
| [K].kQELSEAEQATR.[T]              | N-Term(iTRAQ4plex); K1(iTRAQ4  | 1 | 1 |
| [R].tELRPGETLNVNFLLR.[M]          | N-Term(iTRAQ4plex)             | 1 | 1 |
| [R].eGVQkEDIPPADLSDQVPDTESETR.[I] | N-Term(iTRAQ4plex); K5(iTRAQ4  | 1 | 1 |
| [K].kQELSEAEQATR.[T]              | N-Term(iTRAQ4plex); K1(iTRAQ4  | 1 | 1 |
| [R].aPSTWLTAYVVK.[V]              | N-Term(iTRAQ4plex); K12(iTRAQ  | 1 | 1 |
| [R].eGVQkEDIPPADLSDQVPDTESETR.[I] | N-Term(iTRAQ4plex); K5(iTRAQ4  | 1 | 1 |
| [R].eGVQkEDIPPADLSDQVPDTESETR.[I] | N-Term(iTRAQ4plex); K5(iTRAQ4  | 1 | 1 |
| [R].eGVQkEDIPPADLSDQVPDTESETR.[I] | N-Term(iTRAQ4plex); K5(iTRAQ4  | 1 | 1 |
| [R].eGVQkEDIPPADLSDQVPDTESETR.[I] | N-Term(iTRAQ4plex); K5(iTRAQ4  | 1 | 1 |
| [K].kQELSEAEQATR.[T]              | N-Term(iTRAQ4plex); K1(iTRAQ4  | 1 | 1 |
| [R].IVAYYTLIGASGQR.[E]            | N-Term(iTRAQ4plex)             | 1 | 1 |
| [R].IVAYYTLIGASGQR.[E]            | N-Term(iTRAQ4plex)             | 1 | 1 |
| [R].IVAYYTLIGASGQR.[E]            | N-Term(iTRAQ4plex)             | 1 | 1 |
| [K].dTWVEHWPEEDEcQDEENQk.[Q]      | N-Term(iTRAQ4plex); C13(Carbar | 1 | 1 |
| [R].eGVQkEDIPPADLSDQVPDTESETR.[I] | N-Term(iTRAQ4plex); K5(iTRAQ4  | 1 | 1 |
| [R].IVAYYTLIGASGQR.[E]            | N-Term(iTRAQ4plex)             | 1 | 1 |
| [K].dTWVEHWPEEDEcQDEENQk.[Q]      | N-Term(iTRAQ4plex); C13(Carbar | 1 | 1 |
| [K].dTWVEHWPEEDEcQDEENQk.[Q]      | N-Term(iTRAQ4plex); C13(Carbar | 1 | 1 |
| [R].aPSTWLTAYVVK.[V]              | N-Term(iTRAQ4plex); K12(iTRAQ  | 1 | 1 |
| [R].eGVQkEDIPPADLSDQVPDTESETR.[I] | N-Term(iTRAQ4plex); K5(iTRAQ4  | 1 | 1 |
| [K].yFkPGMPFDLMVFVTNPDGSPAYR.[V]  | N-Term(iTRAQ4plex); K3(iTRAQ4  | 1 | 1 |
| [R].IVAYYTLIGASGQR.[E]            | N-Term(iTRAQ4plex)             | 1 | 1 |
| [R].eGVQkEDIPPADLSDQVPDTESETR.[I] | N-Term(iTRAQ4plex); K5(iTRAQ4  | 1 | 1 |
| [K].kQELSEAEQATR.[T]              | N-Term(iTRAQ4plex); K1(iTRAQ4  | 1 | 1 |
| [K].kQELSEAEQATR.[T]              | N-Term(iTRAQ4plex); K1(iTRAQ4  | 1 | 1 |
| [R].eGVQkEDIPPADLSDQVPDTESETR.[I] | N-Term(iTRAQ4plex); K5(iTRAQ4  | 1 | 1 |
| [K].kQELSEAEQATR.[T]              | N-Term(iTRAQ4plex); K1(iTRAQ4  | 1 | 1 |
| [R].eGVQkEDIPPADLSDQVPDTESETR.[I] | N-Term(iTRAQ4plex); K5(iTRAQ4  | 1 | 1 |
| [K].kQELSEAEQATR.[T]              | N-Term(iTRAQ4plex); K1(iTRAQ4  | 1 | 1 |
| [K].kQELSEAEQATR.[T]              | N-Term(iTRAQ4plex); K1(iTRAQ4  | 1 | 1 |
| [R].eGVQkEDIPPADLSDQVPDTESETR.[I] | N-Term(iTRAQ4plex); K5(iTRAQ4  | 1 | 1 |
| [R].IPIEDGSGEVVLSR.[K]            |                                | 1 | 1 |
| [K].kQELSEAEQATR.[T]              | N-Term(iTRAQ4plex); K1(iTRAQ4  | 1 | 1 |
| [R].eGVQkEDIPPADLSDQVPDTESETR.[I] | N-Term(iTRAQ4plex); K5(iTRAQ4  | 1 | 1 |
| [R].eGVQkEDIPPADLSDQVPDTESETR.[I] | N-Term(iTRAQ4plex); K5(iTRAQ4  | 1 | 1 |
| [R].eGVQkEDIPPADLSDQVPDTESETR.[I] | N-Term(iTRAQ4plex); K5(iTRAQ4  | 1 | 1 |
| [R].eGVQkEDIPPADLSDQVPDTESETR.[I] | N-Term(iTRAQ4plex); K5(iTRAQ4  | 1 | 1 |
| [K].kQELSEAEQATR.[T]              | N-Term(iTRAQ4plex); K1(iTRAQ4  | 1 | 1 |
| [K].kQELSEAEQATR.[T]              | N-Term(iTRAQ4plex); K1(iTRAQ4  | 1 | 1 |
| [R].eGVQkEDIPPADLSDQVPDTESETR.[I] | N-Term(iTRAQ4plex); K5(iTRAQ4  | 1 | 1 |
| [K].kQELSEAEQATR.[T]              | N-Term(iTRAQ4plex); K1(iTRAQ4  | 1 | 1 |
| [K].kQELSEAEQATR.[T]              | N-Term(iTRAQ4plex); K1(iTRAQ4  | 1 | 1 |
| [K].kHYLMWGLSSDFWGEKPNLSYIIgk.[D] | K1(iTRAQ4plex); K16(iTRAQ4ple  | 1 | 1 |
| [K].sLYVSATVILHSGSDMVQAER.[S]     | N-Term(iTRAQ4plex)             | 1 | 1 |
| [K].sLYVSATVILHSGSDMVQAER.[S]     | N-Term(iTRAQ4plex)             | 1 | 1 |
| [K].kHYLMWGLSSDFWGEKPNLSYIIgk.[D] | N-Term(iTRAQ4plex); K16(iTRAQ  | 1 | 1 |
| [K].sLYVSATVILHSGSDMVQAER.[S]     | N-Term(iTRAQ4plex)             | 1 | 1 |
| [K].acEPGVDYVYk.[T]               | N-Term(iTRAQ4plex); C2(Carbam  | 1 | 1 |
| [K].acEPGVDYVYk.[T]               | N-Term(iTRAQ4plex); C2(Carbam  | 1 | 1 |

|                                   |                               |   |   |
|-----------------------------------|-------------------------------|---|---|
| [K].acEPGVDYVYk.[T]               | N-Term(iTRAQ4plex); C2(Carbam | 1 | 1 |
| [K].acEPGVDYVYk.[T]               | N-Term(iTRAQ4plex); C2(Carbam | 1 | 1 |
| [K].sLYVSATVILHSGSDMVQAER.[S]     | N-Term(iTRAQ4plex)            | 1 | 1 |
| [K].fVTVQATFGTQVVEk.[V]           | N-Term(iTRAQ4plex); K15(iTRAQ | 1 | 1 |
| [K].sLYVSATVILHSGSDMVQAER.[S]     | N-Term(iTRAQ4plex)            | 1 | 1 |
| [R].tELRPGETLNVNFLLR.[M]          | N-Term(iTRAQ4plex)            | 1 | 1 |
| [K].sLYVSATVILHSGSDMVQAER.[S]     | N-Term(iTRAQ4plex)            | 1 | 1 |
| [K].kHYLMWGLSSDFWGEkPNLSYIIgk.[D] | N-Term(iTRAQ4plex); K1(iTRAQ4 | 1 | 1 |
| [K].kVEGTAfVIFGIQDGEQR.[I]        | N-Term(iTRAQ4plex); K1(iTRAQ4 | 1 | 1 |
| [K].fVTVQATFGTQVVEk.[V]           | N-Term(iTRAQ4plex); K15(iTRAQ | 1 | 1 |
| [R].tMQALPYSTVGNsNNYLHLSVLR.[T]   | N-Term(iTRAQ4plex)            | 1 | 1 |
| [K].sLYVSATVILHSGSDMVQAER.[S]     | N-Term(iTRAQ4plex)            | 1 | 1 |
| [R].tMQALPYSTVGNsNNYLHLSVLR.[T]   | N-Term(iTRAQ4plex)            | 1 | 1 |
| [K].sLYVSATVILHSGSDMVQAER.[S]     | N-Term(iTRAQ4plex)            | 1 | 1 |
| [R].tELRPGETLNVNFLLR.[M]          | N-Term(iTRAQ4plex)            | 1 | 1 |
| [K].kVEGTAfVIFGIQDGEQR.[I]        | N-Term(iTRAQ4plex); K1(iTRAQ4 | 1 | 1 |
| [K].akDQLTcNk.[F]                 | N-Term(iTRAQ4plex); K2(iTRAQ4 | 1 | 1 |
| [K].sGSDEVQVGQQR.[T]              | N-Term(iTRAQ4plex)            | 1 | 1 |
| [K].fVTVQATFGTQVVEk.[V]           | N-Term(iTRAQ4plex); K15(iTRAQ | 1 | 1 |
| [R].tELRPGETLNVNFLLR.[M]          | N-Term(iTRAQ4plex)            | 1 | 1 |
| [R].rHQQVTIPPk.[S]                | N-Term(iTRAQ4plex); K11(iTRAQ | 1 | 1 |
| [R].rHQQVTIPPk.[S]                | N-Term(iTRAQ4plex); K11(iTRAQ | 1 | 1 |
| [R].TELRPGETLNVNFLLR.[M]          |                               | 1 | 1 |
| [K].aGDFLEANYMNLQR.[S]            | N-Term(iTRAQ4plex)            | 1 | 1 |
| [R].rHQQVTIPPk.[S]                | N-Term(iTRAQ4plex); K11(iTRAQ | 1 | 1 |
| [K].fVTVQATFGTQVVEk.[V]           | N-Term(iTRAQ4plex); K15(iTRAQ | 1 | 1 |
| [R].hQQVTIPPk.[S]                 | N-Term(iTRAQ4plex); K10(iTRAQ | 1 | 1 |
| [K].vVLVSLQSGYLFIQTDk.[T]         | N-Term(iTRAQ4plex); K17(iTRAQ | 1 | 1 |
| [K].kVEGTAfVIFGIQDGEQR.[I]        | N-Term(iTRAQ4plex); K1(iTRAQ4 | 1 | 1 |
| [R].hQQVTIPPk.[S]                 | N-Term(iTRAQ4plex); K10(iTRAQ | 1 | 1 |
| [R].hQQVTIPPk.[S]                 | N-Term(iTRAQ4plex); K10(iTRAQ | 1 | 1 |
| [K].vVLVSLQSGYLFIQTDk.[T]         | N-Term(iTRAQ4plex); K17(iTRAQ | 1 | 1 |
| [R].rHQQVTIPPk.[S]                | N-Term(iTRAQ4plex); K11(iTRAQ | 1 | 1 |
| [R].rHQQVTIPPk.[S]                | N-Term(iTRAQ4plex); K11(iTRAQ | 1 | 1 |
| [R].rHQQVTIPPk.[S]                | N-Term(iTRAQ4plex); K11(iTRAQ | 1 | 1 |
| [K].DlcEEQVNSLPGSITk.[A]          | C3(Carbamidomethyl); K16(iTRA | 1 | 1 |
| [K].eDIPPADLSDQVPDTESETR.[I]      | N-Term(iTRAQ4plex)            | 1 | 1 |
| [K].eDIPPADLSDQVPDTESETR.[I]      | N-Term(iTRAQ4plex)            | 1 | 1 |
| [R].sYTVAIAGYALAQMGR.[L]          | N-Term(iTRAQ4plex)            | 1 | 1 |
| [R].sYTVAIAGYALAQMGR.[L]          | N-Term(iTRAQ4plex)            | 1 | 1 |
| [R].tELRPGETLNVNFLLR.[M]          | N-Term(iTRAQ4plex)            | 1 | 1 |
| [K].hYLMWGLSSDFWGEkPNLSYIIgk.[D]  | N-Term(iTRAQ4plex); K15(iTRAQ | 1 | 1 |
| [R].tELRPGETLNVNFLLR.[M]          | N-Term(iTRAQ4plex)            | 1 | 1 |
| [R].TELRPGETLNVNFLLR.[M]          |                               | 1 | 1 |
| [K].ADIGcTPGSGk.[D]               | C5(Carbamidomethyl); K11(iTRA | 1 | 1 |
| [R].tELRPGETLNVNFLLR.[M]          | N-Term(iTRAQ4plex)            | 1 | 1 |
| [R].tELRPGETLNVNFLLR.[M]          | N-Term(iTRAQ4plex)            | 1 | 1 |
| [R].TELRPGETLNVNFLLR.[M]          |                               | 1 | 1 |
| [K].kQELSEAEQATR.[T]              | K1(iTRAQ4plex)                | 1 | 1 |
| [K].kQELSEAEQATR.[T]              | N-Term(iTRAQ4plex)            | 1 | 1 |
| [K].yFkPGMPFDLmVFVTNPDGSPAYR.[V]  | N-Term(iTRAQ4plex); K3(iTRAQ4 | 1 | 1 |
| [K].hYLMWGLSSDFWGEkPNLSYIIgk.[D]  | N-Term(iTRAQ4plex); K15(iTRAQ | 1 | 1 |

|                               |                                |   |   |
|-------------------------------|--------------------------------|---|---|
| [R].tELRPGETLNVNFLLR.[M]      | N-Term(iTRAQ4plex)             | 1 | 1 |
| [K].fVTVQATFGTQVVEk.[V]       | N-Term(iTRAQ4plex); K15(iTRAQ4 | 1 | 1 |
| [K].kVEGTAfVIFGIQDGEQR.[I]    | N-Term(iTRAQ4plex); K1(iTRAQ4  | 1 | 1 |
| [R].sNLDEDIIAEENIVSR.[S]      | N-Term(iTRAQ4plex)             | 1 | 1 |
| [R].sNLDEDIIAEENIVSR.[S]      | N-Term(iTRAQ4plex)             | 1 | 1 |
| [R].SNLDEDIIAEENIVSR.[S]      |                                | 1 | 1 |
| [R].SNLDEDIIAEENIVSR.[S]      |                                | 1 | 1 |
| [K].eDIPPADLSDQVPDTESETR.[I]  | N-Term(iTRAQ4plex)             | 1 | 1 |
| [K].eDIPPADLSDQVPDTESETR.[I]  | N-Term(iTRAQ4plex)             | 1 | 1 |
| [K].eDIPPADLSDQVPDTESETR.[I]  | N-Term(iTRAQ4plex)             | 1 | 1 |
| [K].eDIPPADLSDQVPDTESETR.[I]  | N-Term(iTRAQ4plex)             | 1 | 1 |
| [R].tkkQELSEAEQATR.[T]        | N-Term(iTRAQ4plex); K2(iTRAQ4  | 1 | 1 |
| [K].eDIPPADLSDQVPDTESETR.[I]  | N-Term(iTRAQ4plex)             | 1 | 1 |
| [K].sSLSVPYVIVPLk.[T]         | N-Term(iTRAQ4plex); K13(iTRAQ4 | 1 | 1 |
| [K].eDIPPADLSDQVPDTESETR.[I]  | N-Term(iTRAQ4plex)             | 1 | 1 |
| [K].eDIPPADLSDQVPDTESETR.[I]  | N-Term(iTRAQ4plex)             | 1 | 1 |
| [K].sLYVSATVILHSGSDMVQAER.[S] | N-Term(iTRAQ4plex)             | 1 | 1 |
| [K].eDIPPADLSDQVPDTESETR.[I]  | N-Term(iTRAQ4plex)             | 1 | 1 |
| [K].eDIPPADLSDQVPDTESETR.[I]  | N-Term(iTRAQ4plex)             | 1 | 1 |
| [K].EDIPPADLSDQVPDTESETR.[I]  |                                | 1 | 1 |
| [K].eDIPPADLSDQVPDTESETR.[I]  | N-Term(iTRAQ4plex)             | 1 | 1 |
| [K].dTWVEHWPEEDEcQDEENQk.[Q]  | C13(Carbamidomethyl); K20(iTR  | 1 | 1 |
| [K].eDIPPADLSDQVPDTESETR.[I]  | N-Term(iTRAQ4plex)             | 1 | 1 |
| [K].dTWVEHWPEEDEcQDEENQk.[Q]  | N-Term(iTRAQ4plex); C13(Carbar | 1 | 1 |
| [K].dTWVEHWPEEDEcQDEENQk.[Q]  | N-Term(iTRAQ4plex); C13(Carbar | 1 | 1 |
| [K].eDIPPADLSDQVPDTESETR.[I]  | N-Term(iTRAQ4plex)             | 1 | 1 |
| [K].dTWVEHWPEEDEcQDEENQk.[Q]  | C13(Carbamidomethyl); K20(iTR  | 1 | 1 |
| [K].dTWVEHWPEEDEcQDEENQk.[Q]  | N-Term(iTRAQ4plex); C13(Carbar | 1 | 1 |
| [K].eDIPPADLSDQVPDTESETR.[I]  | N-Term(iTRAQ4plex)             | 1 | 1 |
| [K].dTWVEHWPEEDEcQDEENQk.[Q]  | N-Term(iTRAQ4plex); C13(Carbar | 1 | 1 |
| [K].eDIPPADLSDQVPDTESETR.[I]  | N-Term(iTRAQ4plex)             | 1 | 1 |
| [K].eDIPPADLSDQVPDTESETR.[I]  | N-Term(iTRAQ4plex)             | 1 | 1 |
| [K].EDIPPADLSDQVPDTESETR.[I]  |                                | 1 | 1 |
| [K].eDIPPADLSDQVPDTESETR.[I]  | N-Term(iTRAQ4plex)             | 1 | 1 |
| [K].eDIPPADLSDQVPDTESETR.[I]  | N-Term(iTRAQ4plex)             | 1 | 1 |
| [K].eDIPPADLSDQVPDTESETR.[I]  | N-Term(iTRAQ4plex)             | 1 | 1 |
| [K].VSHSEDDcLAFk.[V]          | C8(Carbamidomethyl); K12(iTRA  | 1 | 1 |
| [K].eDIPPADLSDQVPDTESETR.[I]  | N-Term(iTRAQ4plex)             | 1 | 1 |
| [K].EDIPPADLSDQVPDTESETR.[I]  |                                | 1 | 1 |
| [K].eDIPPADLSDQVPDTESETR.[I]  | N-Term(iTRAQ4plex)             | 1 | 1 |
| [K].eDIPPADLSDQVPDTESETR.[I]  | N-Term(iTRAQ4plex)             | 1 | 1 |
| [K].EDIPPADLSDQVPDTESETR.[I]  |                                | 1 | 1 |
| [K].eDIPPADLSDQVPDTESETR.[I]  | N-Term(iTRAQ4plex)             | 1 | 1 |
| [K].VSHSEDDcLAFk.[V]          | C8(Carbamidomethyl); K12(iTRA  | 1 | 1 |
| [K].EDIPPADLSDQVPDTESETR.[I]  |                                | 1 | 1 |
| [K].eDIPPADLSDQVPDTESETR.[I]  | N-Term(iTRAQ4plex)             | 1 | 1 |
| [K].EDIPPADLSDQVPDTESETR.[I]  |                                | 1 | 1 |
| [K].eDIPPADLSDQVPDTESETR.[I]  | N-Term(iTRAQ4plex)             | 1 | 1 |
| [K].dTWVEHWPEEDEcQDEENQk.[Q]  | N-Term(iTRAQ4plex); C13(Carbar | 1 | 1 |
| [K].VSHSEDDcLAFk.[V]          | C8(Carbamidomethyl); K12(iTRA  | 1 | 1 |

|                                   |                                         |   |   |
|-----------------------------------|-----------------------------------------|---|---|
| [K].VTIKPAPETEk.[R]               | K4(iTRAQ4plex); K11(iTRAQ4plex)         | 1 | 1 |
| [K].aDIGcTPGSGk.[D]               | N-Term(iTRAQ4plex); C5(Carbamidomethyl) | 1 | 1 |
| [R].fYHPEkEDGk.[L]                | N-Term(iTRAQ4plex); K6(iTRAQ4plex)      | 1 | 1 |
| [K].aDIGcTPGSGk.[D]               | N-Term(iTRAQ4plex); C5(Carbamidomethyl) | 1 | 1 |
| [R].sYTVAIAGYALAQMGR.[L]          | N-Term(iTRAQ4plex)                      | 1 | 1 |
| [R].fYHPEkEDGk.[L]                | N-Term(iTRAQ4plex); K6(iTRAQ4plex)      | 1 | 1 |
| [K].sLYVSATVILHSGSDMVQAER.[S]     | N-Term(iTRAQ4plex)                      | 1 | 1 |
| [R].sYTVAIAGYALAQMGR.[L]          | N-Term(iTRAQ4plex)                      | 1 | 1 |
| [R].fYHPEkEDGk.[L]                | N-Term(iTRAQ4plex); K6(iTRAQ4plex)      | 1 | 1 |
| [K].aDIGcTPGSGk.[D]               | N-Term(iTRAQ4plex); C5(Carbamidomethyl) | 1 | 1 |
| [K].aDIGcTPGSGk.[D]               | N-Term(iTRAQ4plex); C5(Carbamidomethyl) | 1 | 1 |
| [K].sSLSVPYVIVPLk.[T]             | N-Term(iTRAQ4plex); K13(iTRAQ4plex)     | 1 | 1 |
| [K].akDQLTcNk.[F]                 | N-Term(iTRAQ4plex); K2(iTRAQ4plex)      | 1 | 1 |
| [R].aELQcPQPAAR.[R]               | N-Term(iTRAQ4plex); C5(Carbamidomethyl) | 1 | 1 |
| [R].aELQcPQPAAR.[R]               | N-Term(iTRAQ4plex); C5(Carbamidomethyl) | 1 | 1 |
| [R].sYTVAIAGYALAQMGR.[L]          | N-Term(iTRAQ4plex)                      | 1 | 1 |
| [R].sYTVAIAGYALAQMGR.[L]          | N-Term(iTRAQ4plex)                      | 1 | 1 |
| [R].sYTVAIAGYALAQMGR.[L]          | N-Term(iTRAQ4plex)                      | 1 | 1 |
| [K].sSLSVPYVIVPLk.[T]             | N-Term(iTRAQ4plex); K13(iTRAQ4plex)     | 1 | 1 |
| [K].VTIKPAPETEk.[R]               | K4(iTRAQ4plex); K11(iTRAQ4plex)         | 1 | 1 |
| [K].DTWVEHWPEEDcQDEENQk.[Q]       | C13(Carbamidomethyl); K20(iTRAQ4plex)   | 1 | 1 |
| [K].eNEGFTVTAEGk.[G]              | N-Term(iTRAQ4plex); K12(iTRAQ4plex)     | 1 | 1 |
| [K].eNEGFTVTAEGk.[G]              | N-Term(iTRAQ4plex); K12(iTRAQ4plex)     | 1 | 1 |
| [K].eNEGFTVTAEGk.[G]              | N-Term(iTRAQ4plex); K12(iTRAQ4plex)     | 1 | 1 |
| [R].cAEENcFIQk.[S]                | N-Term(iTRAQ4plex); C1(Carbamidomethyl) | 1 | 1 |
| [R].cAEENcFIQk.[S]                | N-Term(iTRAQ4plex); C1(Carbamidomethyl) | 1 | 1 |
| [K].eNEGFTVTAEGk.[G]              | N-Term(iTRAQ4plex); K12(iTRAQ4plex)     | 1 | 1 |
| [K].eNEGFTVTAEGk.[G]              | N-Term(iTRAQ4plex); K12(iTRAQ4plex)     | 1 | 1 |
| [K].sLYVSATVILHSGSDMVQAER.[S]     | N-Term(iTRAQ4plex)                      | 1 | 1 |
| [K].eNEGFTVTAEGk.[G]              | N-Term(iTRAQ4plex); K12(iTRAQ4plex)     | 1 | 1 |
| [K].eNEGFTVTAEGk.[G]              | N-Term(iTRAQ4plex); K12(iTRAQ4plex)     | 1 | 1 |
| [K].tGLQEVEVk.[A]                 | N-Term(iTRAQ4plex); K9(iTRAQ4plex)      | 1 | 1 |
| [K].tGLQEVEVk.[A]                 | N-Term(iTRAQ4plex); K9(iTRAQ4plex)      | 1 | 1 |
| [K].vSHSEDDcLAFk.[V]              | N-Term(iTRAQ4plex); C8(Carbamidomethyl) | 1 | 1 |
| [K].vSHSEDDcLAFk.[V]              | N-Term(iTRAQ4plex); C8(Carbamidomethyl) | 1 | 1 |
| [K].vSHSEDDcLAFk.[V]              | N-Term(iTRAQ4plex); C8(Carbamidomethyl) | 1 | 1 |
| [K].vSHSEDDcLAFk.[V]              | N-Term(iTRAQ4plex); C8(Carbamidomethyl) | 1 | 1 |
| [K].eNEGFTVTAEGk.[G]              | N-Term(iTRAQ4plex); K12(iTRAQ4plex)     | 1 | 1 |
| [K].eNEGFTVTAEGk.[G]              | N-Term(iTRAQ4plex); K12(iTRAQ4plex)     | 1 | 1 |
| [R].cAEENcFIQk.[S]                | N-Term(iTRAQ4plex); C1(Carbamidomethyl) | 1 | 1 |
| [K].tGLQEVEVk.[A]                 | N-Term(iTRAQ4plex); K9(iTRAQ4plex)      | 1 | 1 |
| [K].tGLQEVEVk.[A]                 | N-Term(iTRAQ4plex); K9(iTRAQ4plex)      | 1 | 1 |
| [K].dYAGVFS DAGLTF TSSSGQQAQR.[A] | N-Term(iTRAQ4plex)                      | 1 | 1 |
| [K].sLYVSATVILHSGSDMVQAER.[S]     | N-Term(iTRAQ4plex)                      | 1 | 1 |
| [R].seETkENEGFTVTAEGk.[G]         | N-Term(iTRAQ4plex); K5(iTRAQ4plex)      | 1 | 1 |
| [R].seETkENEGFTVTAEGk.[G]         | N-Term(iTRAQ4plex); K5(iTRAQ4plex)      | 1 | 1 |
| [K].sLYVSATVILHSGSDMVQAER.[S]     | N-Term(iTRAQ4plex)                      | 1 | 1 |
| [K].ENEGFTVTAEGk.[G]              | K12(iTRAQ4plex)                         | 1 | 1 |
| [K].eNEGFTVTAEGk.[G]              | N-Term(iTRAQ4plex); K12(iTRAQ4plex)     | 1 | 1 |
| [K].eNEGFTVTAEGk.[G]              | N-Term(iTRAQ4plex); K12(iTRAQ4plex)     | 1 | 1 |
| [K].fVTVQATFGTQVVEk.[V]           | N-Term(iTRAQ4plex); K15(iTRAQ4plex)     | 1 | 1 |
| [K].vSHSEDDcLAFk.[V]              | N-Term(iTRAQ4plex); C8(Carbamidomethyl) | 1 | 1 |

|                                       |                                |   |   |
|---------------------------------------|--------------------------------|---|---|
| [K].dTWVEHWPEEDEcQDEENQk.[Q]          | N-Term(iTRAQ4plex); C13(Carbar | 1 | 1 |
| [K].dTWVEHWPEEDEcQDEENQk.[Q]          | N-Term(iTRAQ4plex); C13(Carbar | 1 | 1 |
| [K].dTWVEHWPEEDEcQDEENQk.[Q]          | N-Term(iTRAQ4plex); C13(Carbar | 1 | 1 |
| [K].dTWVEHWPEEDEcQDEENQk.[Q]          | N-Term(iTRAQ4plex); C13(Carbar | 1 | 1 |
| [K].eDIPPADLSQVPDTESETR.[I]           | N-Term(iTRAQ4plex)             | 1 | 1 |
| [K].dTWVEHWPEEDEcQDEENQk.[Q]          | N-Term(iTRAQ4plex); C13(Carbar | 1 | 1 |
| [K].eDIPPADLSQVPDTESETR.[I]           | N-Term(iTRAQ4plex)             | 1 | 1 |
| [K].eDIPPADLSQVPDTESETR.[I]           | N-Term(iTRAQ4plex)             | 1 | 1 |
| [K].vSHSEDDcLAFk.[V]                  | N-Term(iTRAQ4plex); C8(Carbam  | 1 | 1 |
| [K].AcEPGVDYVYk.[T]                   | C2(Carbamidomethyl); K11(iTRA  | 1 | 1 |
| [K].AcEPGVDYVYk.[T]                   | C2(Carbamidomethyl); K11(iTRA  | 1 | 1 |
| [K].vSHSEDDcLAFk.[V]                  | N-Term(iTRAQ4plex); C8(Carbam  | 1 | 1 |
| [K].vSHSEDDcLAFk.[V]                  | N-Term(iTRAQ4plex); C8(Carbam  | 1 | 1 |
| [R].cAEENcFIQk.[S]                    | N-Term(iTRAQ4plex); C1(Carbam  | 1 | 1 |
| [K].vSHSEDDcLAFk.[V]                  | N-Term(iTRAQ4plex); C8(Carbam  | 1 | 1 |
| [K].vSHSEDDcLAFk.[V]                  | N-Term(iTRAQ4plex); C8(Carbam  | 1 | 1 |
| [K].sLYVSATVILHSGSDMVQAER.[S]         | N-Term(iTRAQ4plex)             | 1 | 1 |
| [K].sDDkVTLEER.[L]                    | N-Term(iTRAQ4plex); K4(iTRAQ4  | 1 | 1 |
| [K].VHQYFNVELIQPGAVk.[V]              | K16(iTRAQ4plex)                | 1 | 1 |
| [R].vELLHNPAFcSLATTk.[R]              | N-Term(iTRAQ4plex); C10(Carbar | 1 | 1 |
| [K].qLYNVEATSYALLALLQLkDFDFVPPVVR.[V] | N-Term(iTRAQ4plex); K19(iTRAQ  | 1 | 1 |
| [K].sDDkVTLEER.[L]                    | N-Term(iTRAQ4plex); K4(iTRAQ4  | 1 | 1 |
| [K].VHQYFNVELIQPGAVk.[V]              | K16(iTRAQ4plex)                | 1 | 1 |
| [K].sDDkVTLEER.[L]                    | N-Term(iTRAQ4plex); K4(iTRAQ4  | 1 | 1 |
| [K].sDDkVTLEER.[L]                    | N-Term(iTRAQ4plex); K4(iTRAQ4  | 1 | 1 |
| [K].sDDkVTLEER.[L]                    | N-Term(iTRAQ4plex); K4(iTRAQ4  | 1 | 1 |
| [R].vELLHNPAFcSLATTk.[R]              | N-Term(iTRAQ4plex); C10(Carbar | 1 | 1 |
| [K].dScVGSLVVK.[S]                    | N-Term(iTRAQ4plex); C3(Carbam  | 1 | 1 |
| [K].dScVGSLVVK.[S]                    | N-Term(iTRAQ4plex); C3(Carbam  | 1 | 1 |
| [K].kQELSEAEQATR.[T]                  | K1(iTRAQ4plex)                 | 1 | 1 |
| [K].kQELSEAEQATR.[T]                  | N-Term(iTRAQ4plex)             | 1 | 1 |
| [K].kQELSEAEQATR.[T]                  | K1(iTRAQ4plex)                 | 1 | 1 |
| [K].kQELSEAEQATR.[T]                  | N-Term(iTRAQ4plex)             | 1 | 1 |
| [K].kQELSEAEQATR.[T]                  | K1(iTRAQ4plex)                 | 1 | 1 |
| [K].gLEVTITAR.[F]                     | N-Term(iTRAQ4plex)             | 1 | 1 |
| [K].VHQYFNVELIQPGAVk.[V]              | K16(iTRAQ4plex)                | 1 | 1 |
| [K].VHQYFNVELIQPGAVk.[V]              | K16(iTRAQ4plex)                | 1 | 1 |
| [K].kQELSEAEQATR.[T]                  | N-Term(iTRAQ4plex)             | 1 | 1 |
| [K].kQELSEAEQATR.[T]                  | N-Term(iTRAQ4plex)             | 1 | 1 |
| [K].kQELSEAEQATR.[T]                  | K1(iTRAQ4plex)                 | 1 | 1 |
| [K].kQELSEAEQATR.[T]                  | N-Term(iTRAQ4plex)             | 1 | 1 |
| [K].kQELSEAEQATR.[T]                  | K1(iTRAQ4plex)                 | 1 | 1 |
| [K].kQELSEAEQATR.[T]                  | N-Term(iTRAQ4plex)             | 1 | 1 |
| [K].sGSDEVQVGQQR.[T]                  | N-Term(iTRAQ4plex)             | 1 | 1 |
| [K].sGSDEVQVGQQR.[T]                  | N-Term(iTRAQ4plex)             | 1 | 1 |
| [R].vELLHNPAFcSLATTk.[R]              | N-Term(iTRAQ4plex); C10(Carbar | 1 | 1 |
| [R].vELLHNPAFcSLATTk.[R]              | N-Term(iTRAQ4plex); C10(Carbar | 1 | 1 |
| [R].vELLHNPAFcSLATTk.[R]              | N-Term(iTRAQ4plex); C10(Carbar | 1 | 1 |
| [K].vYAYYNLEEScTR.[F]                 | N-Term(iTRAQ4plex); C11(Carbar | 1 | 1 |
| [K].vYAYYNLEEScTR.[F]                 | N-Term(iTRAQ4plex); C11(Carbar | 1 | 1 |
| [R].vELLHNPAFcSLATTk.[R]              | N-Term(iTRAQ4plex); C10(Carbar | 1 | 1 |
| [R].vELLHNPAFcSLATTk.[R]              | N-Term(iTRAQ4plex); C10(Carbar | 1 | 1 |

|                                  |                                |   |   |
|----------------------------------|--------------------------------|---|---|
| [K].sDDkVtLEER.[L]               | N-Term(iTRAQ4plex); K4(iTRAQ4  | 1 | 1 |
| [K].sDDkVtLEER.[L]               | N-Term(iTRAQ4plex); K4(iTRAQ4  | 1 | 1 |
| [R].vELLHNPAFcSLATtk.[R]         | N-Term(iTRAQ4plex); C10(Carbar | 1 | 1 |
| [K].sGSDEVQVGQQR.[T]             | N-Term(iTRAQ4plex)             | 1 | 1 |
| [K].sGSDEVQVGQQR.[T]             | N-Term(iTRAQ4plex)             | 1 | 1 |
| [K].sGSDEVQVGQQR.[T]             | N-Term(iTRAQ4plex)             | 1 | 1 |
| [K].kQELSEAEQATR.[T]             | N-Term(iTRAQ4plex)             | 1 | 1 |
| [K].rIPIEDGSGEVLSR.[K]           | N-Term(iTRAQ4plex)             | 1 | 1 |
| [R].sYTVAIAGYALAQMGR.[L]         | N-Term(iTRAQ4plex)             | 1 | 1 |
| [K].vFSLAVNLIIDSQVLCgAVk.[W]     | N-Term(iTRAQ4plex); C17(Carbar | 1 | 1 |
| [K].VYAYNLEEScTR.[F]             | C11(Carbamidomethyl)           | 1 | 1 |
| [K].qDSLSSQNQLGVLPLSWDIPELVNMGMW | N-Term(iTRAQ4plex); K29(iTRAQ  | 1 | 1 |
| [K].kVEGTAfVIFIGIQDGEQR.[I]      | N-Term(iTRAQ4plex); K1(iTRAQ4  | 1 | 1 |
| [K].rIPIEDGSGEVLSR.[K]           | N-Term(iTRAQ4plex)             | 1 | 1 |
| [K].sLYVSATVILHSGSDMVQAER.[S]    | N-Term(iTRAQ4plex)             | 1 | 1 |
| [K].qDSLSSQNQLGVLPLSWDIPELVNMGMW | N-Term(iTRAQ4plex); K29(iTRAQ  | 1 | 1 |
| [K].vFSLAVNLIIDSQVLCgAVk.[W]     | N-Term(iTRAQ4plex); C17(Carbar | 1 | 1 |
| [K].qDSLSSQNQLGVLPLSWDIPELVNMGMW | N-Term(iTRAQ4plex); K29(iTRAQ  | 1 | 1 |
| [K].aAVYHHFISDGVR.[K]            | N-Term(iTRAQ4plex)             | 1 | 1 |
| [K].rIPIEDGSGEVLSR.[K]           | N-Term(iTRAQ4plex)             | 1 | 1 |
| [K].rIPIEDGSGEVLSR.[K]           | N-Term(iTRAQ4plex)             | 1 | 1 |
| [K].rIPIEDGSGEVLSR.[K]           | N-Term(iTRAQ4plex)             | 1 | 1 |
| [K].rIPIEDGSGEVLSR.[K]           | N-Term(iTRAQ4plex)             | 1 | 1 |
| [K].rAPSTWLTAYVvk.[V]            | N-Term(iTRAQ4plex); K13(iTRAQ  | 1 | 1 |
| [K].rIPIEDGSGEVLSR.[K]           | N-Term(iTRAQ4plex)             | 1 | 1 |
| [K].vFSLAVNLIIDSQVLCgAVk.[W]     | N-Term(iTRAQ4plex); C17(Carbar | 1 | 1 |
| [K].vRVELLHNPAFcSLATtk.[R]       | N-Term(iTRAQ4plex); C12(Carbar | 1 | 1 |
| [K].sGSDEVQVGQQR.[T]             | N-Term(iTRAQ4plex)             | 1 | 1 |
| [K].gLEVTITAR.[F]                | N-Term(iTRAQ4plex)             | 1 | 1 |
| [R].ePGQDLVVLPLSITTFIPsFR.[L]    | N-Term(iTRAQ4plex)             | 1 | 1 |
| [R].vELLHNPAFcSLATtk.[R]         | N-Term(iTRAQ4plex); C10(Carbar | 1 | 1 |
| [R].ePGQDLVVLPLSITTFIPsFR.[L]    | N-Term(iTRAQ4plex)             | 1 | 1 |
| [K].sGSDEVQVGQQR.[T]             | N-Term(iTRAQ4plex)             | 1 | 1 |
| [K].gLEVTITAR.[F]                | N-Term(iTRAQ4plex)             | 1 | 1 |
| [K].kQELSEAEQATR.[T]             | K1(iTRAQ4plex)                 | 1 | 1 |
| [K].gLEVTITAR.[F]                | N-Term(iTRAQ4plex)             | 1 | 1 |
| [R].VELLHNPAFcSLATtk.[R]         | C10(Carbamidomethyl); K16(iTR  | 1 | 1 |
| [K].gLEVTITAR.[F]                | N-Term(iTRAQ4plex)             | 1 | 1 |
| [K].vHQYFNVELIQPGAVk.[V]         | N-Term(iTRAQ4plex); K16(iTRAQ  | 1 | 1 |
| [R].vELLHNPAFcSLATtk.[R]         | N-Term(iTRAQ4plex); C10(Carbar | 1 | 1 |
| [R].vELLHNPAFcSLATtk.[R]         | N-Term(iTRAQ4plex); C10(Carbar | 1 | 1 |
| [R].qGALELIK.[K]                 | N-Term(iTRAQ4plex); K8(iTRAQ4  | 1 | 1 |
| [K].dMALTAfVLISLQEAK.[D]         | N-Term(iTRAQ4plex); K16(iTRAQ  | 1 | 1 |
| [K].dMALTAfVLISLQEAK.[D]         | N-Term(iTRAQ4plex); K16(iTRAQ  | 1 | 1 |
| [K].gIcVADPFVETVMQDFIDLr.[L]     | N-Term(iTRAQ4plex); C3(Carbam  | 1 | 1 |
| [K].QELSEAEQATR.[T]              |                                | 1 | 1 |
| [K].dIcEEQVNSLPGSITk.[A]         | N-Term(iTRAQ4plex); C3(Carbam  | 1 | 1 |
| [K].VLLDGVQNPR.[A]               |                                | 1 | 1 |
| [R].hQQTVTIPPk.[S]               | N-Term(iTRAQ4plex); K10(iTRAQ  | 1 | 1 |
| [R].SGIPIVTSPYQIHFTk.[T]         | K16(iTRAQ4plex)                | 1 | 1 |
| [K].fVTVQATFGTQVVEk.[V]          | N-Term(iTRAQ4plex); K15(iTRAQ  | 1 | 1 |
| [R].yTYLIMnk.[G]                 | N-Term(iTRAQ4plex); K9(iTRAQ4  | 1 | 1 |

|                                  |                                          |   |   |
|----------------------------------|------------------------------------------|---|---|
| [R].hQQTVTIPPk.[S]               | N-Term(iTRAQ4plex); K10(iTRAQ4plex)      | 1 | 1 |
| [K].vSHSEDDcLAFk.[V]             | N-Term(iTRAQ4plex); C8(Carbamidomethyl)  | 1 | 1 |
| [K].vYAYYNLEEScTR.[F]            | N-Term(iTRAQ4plex); C11(Carbamidomethyl) | 1 | 1 |
| [K].dIcEEQVNSLPGSITk.[A]         | N-Term(iTRAQ4plex); C3(Carbamidomethyl)  | 1 | 1 |
| [K].yFkPGMPFDLMVFVTPNDGSPAYR.[V] | N-Term(iTRAQ4plex); K3(iTRAQ4plex)       | 1 | 1 |
| [K].dIcEEQVNSLPGSITk.[A]         | N-Term(iTRAQ4plex); C3(Carbamidomethyl)  | 1 | 1 |
| [K].eDIPPADLSDQVPDTESETR.[I]     | N-Term(iTRAQ4plex)                       | 1 | 1 |
| [K].EDIPPADLSDQVPDTESETR.[I]     |                                          | 1 | 1 |
| [K].vTIkPAPETEk.[R]              | N-Term(iTRAQ4plex); K4(iTRAQ4plex)       | 1 | 1 |
| [K].eDIPPADLSDQVPDTESETR.[I]     | N-Term(iTRAQ4plex)                       | 1 | 1 |
| [R].sGIPIVTSPYQIHFTk.[T]         | N-Term(iTRAQ4plex); K16(iTRAQ4plex)      | 1 | 1 |
| [K].eDIPPADLSDQVPDTESETR.[I]     | N-Term(iTRAQ4plex)                       | 1 | 1 |
| [K].eDIPPADLSDQVPDTESETR.[I]     | N-Term(iTRAQ4plex)                       | 1 | 1 |
| [K].EDIPPADLSDQVPDTESETR.[I]     |                                          | 1 | 1 |
| [K].eDIPPADLSDQVPDTESETR.[I]     | N-Term(iTRAQ4plex)                       | 1 | 1 |
| [K].eDIPPADLSDQVPDTESETR.[I]     | N-Term(iTRAQ4plex)                       | 1 | 1 |
| [K].EDIPPADLSDQVPDTESETR.[I]     |                                          | 1 | 1 |
| [K].eDIPPADLSDQVPDTESETR.[I]     | N-Term(iTRAQ4plex)                       | 1 | 1 |
| [K].eDIPPADLSDQVPDTESETR.[I]     | N-Term(iTRAQ4plex)                       | 1 | 1 |
| [K].eDIPPADLSDQVPDTESETR.[I]     | N-Term(iTRAQ4plex)                       | 1 | 1 |
| [K].eDIPPADLSDQVPDTESETR.[I]     | N-Term(iTRAQ4plex)                       | 1 | 1 |
| [K].eDIPPADLSDQVPDTESETR.[I]     | N-Term(iTRAQ4plex)                       | 1 | 1 |
| [K].eDIPPADLSDQVPDTESETR.[I]     | N-Term(iTRAQ4plex)                       | 1 | 1 |
| [K].eDIPPADLSDQVPDTESETR.[I]     | N-Term(iTRAQ4plex)                       | 1 | 1 |
| [K].eDIPPADLSDQVPDTESETR.[I]     | N-Term(iTRAQ4plex)                       | 1 | 1 |
| [K].fVTVQATFGTQVVEk.[V]          | N-Term(iTRAQ4plex); K15(iTRAQ4plex)      | 1 | 1 |
| [K].yFkPGMPFDLMVFVTPNDGSPAYR.[V] | N-Term(iTRAQ4plex); K3(iTRAQ4plex)       | 1 | 1 |
| [K].eDIPPADLSDQVPDTESETR.[I]     | N-Term(iTRAQ4plex)                       | 1 | 1 |
| [R].YYTYLIMNk.[G]                | K9(iTRAQ4plex)                           | 1 | 1 |
| [K].eDIPPADLSDQVPDTESETR.[I]     | N-Term(iTRAQ4plex)                       | 1 | 1 |
| [K].eDIPPADLSDQVPDTESETR.[I]     | N-Term(iTRAQ4plex)                       | 1 | 1 |
| [K].vTIkPAPETEk.[R]              | N-Term(iTRAQ4plex); K4(iTRAQ4plex)       | 1 | 1 |
| [K].EDIPPADLSDQVPDTESETR.[I]     |                                          | 1 | 1 |
| [K].eDIPPADLSDQVPDTESETR.[I]     | N-Term(iTRAQ4plex)                       | 1 | 1 |
| [K].eDIPPADLSDQVPDTESETR.[I]     | N-Term(iTRAQ4plex)                       | 1 | 1 |
| [K].eDIPPADLSDQVPDTESETR.[I]     | N-Term(iTRAQ4plex)                       | 1 | 1 |
| [K].EDIPPADLSDQVPDTESETR.[I]     |                                          | 1 | 1 |
| [K].eDIPPADLSDQVPDTESETR.[I]     | N-Term(iTRAQ4plex)                       | 1 | 1 |
| [K].vTIkPAPETEk.[R]              | N-Term(iTRAQ4plex); K4(iTRAQ4plex)       | 1 | 1 |
| [K].kVEGTAfVIFGIQDGEQR.[I]       | N-Term(iTRAQ4plex); K1(iTRAQ4plex)       | 1 | 1 |
| [K].dIcEEQVNSLPGSITk.[A]         | N-Term(iTRAQ4plex); C3(Carbamidomethyl)  | 1 | 1 |
| [K].eDIPPADLSDQVPDTESETR.[I]     | N-Term(iTRAQ4plex)                       | 1 | 1 |
| [R].SGIPIVTSPYQIHFTk.[T]         | K16(iTRAQ4plex)                          | 1 | 1 |
| [K].eDIPPADLSDQVPDTESETR.[I]     | N-Term(iTRAQ4plex)                       | 1 | 1 |
| [K].eDIPPADLSDQVPDTESETR.[I]     | N-Term(iTRAQ4plex)                       | 1 | 1 |
| [R].sGIPIVTSPYQIHFTk.[T]         | N-Term(iTRAQ4plex); K16(iTRAQ4plex)      | 1 | 1 |
| [K].fVTVQATFGTQVVEk.[V]          | N-Term(iTRAQ4plex); K15(iTRAQ4plex)      | 1 | 1 |
| [R].sGIPIVTSPYQIHFTk.[T]         | N-Term(iTRAQ4plex); K16(iTRAQ4plex)      | 1 | 1 |
| [K].dIcEEQVNSLPGSITk.[A]         | N-Term(iTRAQ4plex); C3(Carbamidomethyl)  | 1 | 1 |
| [R].sYTVAIAGYALAQMGR.[L]         | N-Term(iTRAQ4plex)                       | 1 | 1 |
| [K].fVTVQATFGTQVVEk.[V]          | N-Term(iTRAQ4plex); K15(iTRAQ4plex)      | 1 | 1 |
| [K].EDIPPADLSDQVPDTESETR.[I]     |                                          | 1 | 1 |
| [K].eDIPPADLSDQVPDTESETR.[I]     | N-Term(iTRAQ4plex)                       | 1 | 1 |



|                                  |                                |   |   |
|----------------------------------|--------------------------------|---|---|
| [K].EDIPPADLSDQVPDTESETR.[I]     |                                | 1 | 1 |
| [K].eDIPPADLSDQVPDTESETR.[I]     | N-Term(iTRAQ4plex)             | 1 | 1 |
| [K].EDIPPADLSDQVPDTESETR.[I]     |                                | 1 | 1 |
| [K].vTIkPAPETEk.[R]              | N-Term(iTRAQ4plex); K4(iTRAQ4  | 1 | 1 |
| [K].eDIPPADLSDQVPDTESETR.[I]     | N-Term(iTRAQ4plex)             | 1 | 1 |
| [K].dIcEEQVNSLPGSITk.[A]         | N-Term(iTRAQ4plex); C3(Carbam  | 1 | 1 |
| [K].eDIPPADLSDQVPDTESETR.[I]     | N-Term(iTRAQ4plex)             | 1 | 1 |
| [K].eDIPPADLSDQVPDTESETR.[I]     | N-Term(iTRAQ4plex)             | 1 | 1 |
| [K].eDIPPADLSDQVPDTESETR.[I]     | N-Term(iTRAQ4plex)             | 1 | 1 |
| [K].eDIPPADLSDQVPDTESETR.[I]     | N-Term(iTRAQ4plex)             | 1 | 1 |
| [K].fVTVQATFGTQVVEk.[V]          | N-Term(iTRAQ4plex); K15(iTRAQ  | 1 | 1 |
| [K].vHQYFNVELIQGAVk.[V]          | N-Term(iTRAQ4plex); K16(iTRAQ  | 1 | 1 |
| [K].vYAYYNLEEScTR.[F]            | N-Term(iTRAQ4plex); C11(Carbar | 1 | 1 |
| [K].vHQYFNVELIQGAVk.[V]          | N-Term(iTRAQ4plex); K16(iTRAQ  | 1 | 1 |
| [R].hQQTVTIPPk.[S]               | N-Term(iTRAQ4plex); K10(iTRAQ  | 1 | 1 |
| [K].vHQYFNVELIQGAVk.[V]          | N-Term(iTRAQ4plex); K16(iTRAQ  | 1 | 1 |
| [K].vHQYFNVELIQGAVk.[V]          | N-Term(iTRAQ4plex); K16(iTRAQ  | 1 | 1 |
| [R].LVAYYTLIGASGQR.[E]           |                                | 1 | 1 |
| [K].kVEGTAFVIFGIQDGEQR.[I]       | N-Term(iTRAQ4plex); K1(iTRAQ4  | 1 | 1 |
| [K].qELSEAEQATR.[T]              | N-Term(iTRAQ4plex)             | 1 | 1 |
| [K].qELSEAEQATR.[T]              | N-Term(iTRAQ4plex)             | 1 | 1 |
| [K].qELSEAEQATR.[T]              | N-Term(iTRAQ4plex)             | 1 | 1 |
| [K].vHQYFNVELIQGAVk.[V]          | N-Term(iTRAQ4plex); K16(iTRAQ  | 1 | 1 |
| [K].vHQYFNVELIQGAVk.[V]          | N-Term(iTRAQ4plex); K16(iTRAQ  | 1 | 1 |
| [K].qELSEAEQATR.[T]              | N-Term(iTRAQ4plex)             | 1 | 1 |
| [K].qELSEAEQATR.[T]              | N-Term(iTRAQ4plex)             | 1 | 1 |
| [R].LVAYYTLIGASGQR.[E]           |                                | 1 | 1 |
| [R].qPVPGQQMTLk.[I]              | N-Term(iTRAQ4plex); K11(iTRAQ  | 1 | 1 |
| [K].kVEGTAFVIFGIQDGEQR.[I]       | N-Term(iTRAQ4plex); K1(iTRAQ4  | 1 | 1 |
| [R].vELLHNPAFcSLATTk.[R]         | N-Term(iTRAQ4plex); C10(Carbar | 1 | 1 |
| [R].hQQTVTIPPk.[S]               | N-Term(iTRAQ4plex); K10(iTRAQ  | 1 | 1 |
| [K].vYAYYNLEEScTR.[F]            | N-Term(iTRAQ4plex); C11(Carbar | 1 | 1 |
| [K].fVTVQATFGTQVVEk.[V]          | N-Term(iTRAQ4plex); K15(iTRAQ  | 1 | 1 |
| [R].yYGGGYGSTQATFMVFQALAQYQk.[D] | N-Term(iTRAQ4plex); K24(iTRAQ  | 1 | 1 |
| [R].hQQTVTIPPk.[S]               | N-Term(iTRAQ4plex); K10(iTRAQ  | 1 | 1 |
| [K].dIcEEQVNSLPGSITk.[A]         | N-Term(iTRAQ4plex); C3(Carbam  | 1 | 1 |
| [K].vYAYYNLEEScTR.[F]            | N-Term(iTRAQ4plex); C11(Carbar | 1 | 1 |
| [K].fVTVQATFGTQVVEk.[V]          | N-Term(iTRAQ4plex); K15(iTRAQ  | 1 | 1 |
| [K].vYAYYNLEEScTR.[F]            | N-Term(iTRAQ4plex); C11(Carbar | 1 | 1 |
| [K].RAPSTWLTAYVvk.[V]            | K13(iTRAQ4plex)                | 1 | 1 |
| [R].hQQTVTIPPk.[S]               | N-Term(iTRAQ4plex); K10(iTRAQ  | 1 | 1 |
| [K].vYAYYNLEEScTR.[F]            | N-Term(iTRAQ4plex); C11(Carbar | 1 | 1 |
| [K].dYAGVFS DAGLFTTSSSGQQAQR.[A] | N-Term(iTRAQ4plex)             | 1 | 1 |
| [K].aDIGcTPGSGk.[D]              | N-Term(iTRAQ4plex); C5(Carbam  | 1 | 1 |
| [R].IkgPLLnk.[F]                 | N-Term(iTRAQ4plex); K2(iTRAQ4  | 1 | 1 |
| [R].sGIPIVTSPIYQHfTk.[T]         | N-Term(iTRAQ4plex); K16(iTRAQ  | 1 | 1 |
| [R].SGIPIVTSPIYQHfTk.[T]         | K16(iTRAQ4plex)                | 1 | 1 |
| [K].aGDFLEANYmNLQR.[S]           | N-Term(iTRAQ4plex); M10(Oxida  | 1 | 1 |
| [R].qGALELIk.[K]                 | N-Term(iTRAQ4plex); K8(iTRAQ4  | 1 | 1 |
| [R].yTYLImNk.[G]                 | N-Term(iTRAQ4plex); M7(Oxidat  | 1 | 1 |
| [K].aAVYHHFISDGVR.[K]            | N-Term(iTRAQ4plex)             | 1 | 1 |

|                                  |                                |   |   |
|----------------------------------|--------------------------------|---|---|
| [K].kVEGTAFVIFGIQDGEQR.[I]       | N-Term(iTRAQ4plex); K1(iTRAQ4  | 1 | 1 |
| [K].dQLTcNkFDLk.[V]              | N-Term(iTRAQ4plex); C5(Carbam  | 1 | 1 |
| [R].vVLVAVDk.[G]                 | N-Term(iTRAQ4plex); K8(iTRAQ4  | 1 | 1 |
| [R].vELLHNPAFcSLATtk.[R]         | N-Term(iTRAQ4plex); C10(Carbar | 1 | 1 |
| [R].tFISPIk.[C]                  | N-Term(iTRAQ4plex); K7(iTRAQ4  | 1 | 1 |
| [R].vPVAVQGEDTVQSLTQGDGVak.[L]   | N-Term(iTRAQ4plex); K22(iTRAQ  | 1 | 1 |
| [R].iHWESASLLR.[S]               | N-Term(iTRAQ4plex)             | 1 | 1 |
| [R].IESEETMVLEAHDAQGDVPVTVVHDFPG | N-Term(iTRAQ4plex); K30(iTRAQ  | 1 | 1 |
| [R].eALkLEEK.[K]                 | N-Term(iTRAQ4plex); K4(iTRAQ4  | 1 | 1 |
| [K].EDIPPADLSDQVPDTESETR.[I]     |                                | 1 | 1 |
| [K].aAVYHHFISDGVR.[K]            | N-Term(iTRAQ4plex)             | 1 | 1 |
| [K].fVTVQATFGTQVVEk.[V]          | N-Term(iTRAQ4plex); K15(iTRAQ  | 1 | 1 |
| [K].gYTQQLAFR.[Q]                | N-Term(iTRAQ4plex)             | 1 | 1 |
| [R].TVmVNIENPEGIPVk.[Q]          | M3(Oxidation); K15(iTRAQ4plex  | 1 | 1 |
| [K].vTIkPAPETEk.[R]              | N-Term(iTRAQ4plex); K4(iTRAQ4  | 1 | 1 |
| [R].fYHPEKEDGk.[L]               | N-Term(iTRAQ4plex); K6(iTRAQ4  | 1 | 1 |
| [K].IMNIFLk.[D]                  | N-Term(iTRAQ4plex); K7(iTRAQ4  | 1 | 1 |
| [K].eNEGFTVTAEGk.[G]             | N-Term(iTRAQ4plex); K12(iTRAQ  | 1 | 1 |
| [R].IVAYYTLIGASGQR.[E]           | N-Term(iTRAQ4plex)             | 1 | 1 |
| [K].AcEPGVDYVYk.[T]              | C2(Carbamidomethyl); K11(iTRA  | 1 | 1 |
| [K].sDDkVTLER.[L]                | N-Term(iTRAQ4plex); K4(iTRAQ4  | 1 | 1 |
| [K].aAVYHHFISDGVR.[K]            | N-Term(iTRAQ4plex)             | 1 | 1 |
| [K].gYTQQLAFR.[Q]                | N-Term(iTRAQ4plex)             | 1 | 1 |
| [K].fVTVQATFGTQVVEk.[V]          | N-Term(iTRAQ4plex); K15(iTRAQ  | 1 | 1 |
| [R].iSLPESLk.[R]                 | N-Term(iTRAQ4plex); K8(iTRAQ4  | 1 | 1 |
| [K].eDIPPADLSDQVPDTESETR.[I]     | N-Term(iTRAQ4plex)             | 1 | 1 |
| [K].TIYTPGSTVLYR.[I]             |                                | 1 | 1 |
| [K].vHQYFNVELIQPGAVk.[V]         | N-Term(iTRAQ4plex); K16(iTRAQ  | 1 | 1 |
| [K].aGDFLEANYmNLQR.[S]           | N-Term(iTRAQ4plex); M10(Oxida  | 1 | 1 |
| [R].tFISPIkR.[E]                 | N-Term(iTRAQ4plex); K7(iTRAQ4  | 1 | 1 |
| [K].ADIGcTPGSGk.[D]              | C5(Carbamidomethyl); K11(iTRA  | 1 | 1 |
| [K].rIPIEDGSGEVLSRk.[V]          | N-Term(iTRAQ4plex); K16(iTRAQ  | 1 | 1 |
| [K].gYTQQLAFR.[Q]                | N-Term(iTRAQ4plex)             | 1 | 1 |
| [K].rQGALELIkk.[G]               | N-Term(iTRAQ4plex); K9(iTRAQ4  | 1 | 1 |
| [R].qGALELIk.[K]                 | N-Term(iTRAQ4plex); K8(iTRAQ4  | 1 | 1 |
| [R].vVLVAVDk.[G]                 | N-Term(iTRAQ4plex); K8(iTRAQ4  | 1 | 1 |
| [K].aAVYHHFISDGVR.[K]            | N-Term(iTRAQ4plex)             | 1 | 1 |
| [K].sLYVSATVILHSGSDMVQAER.[S]    | N-Term(iTRAQ4plex)             | 1 | 1 |
| [R].IVAYYTLIGASGQR.[E]           | N-Term(iTRAQ4plex)             | 1 | 1 |
| [R].tkkQELSEAEQATR.[T]           | N-Term(iTRAQ4plex); K2(iTRAQ4  | 1 | 1 |
| [K].kVEGTAFVIFGIQDGEQR.[I]       | N-Term(iTRAQ4plex); K1(iTRAQ4  | 1 | 1 |
| [K].fVTVQATFGTQVVEk.[V]          | N-Term(iTRAQ4plex); K15(iTRAQ  | 1 | 1 |
| [R].fYHPEKEDGk.[L]               | N-Term(iTRAQ4plex); K6(iTRAQ4  | 1 | 1 |
| [K].vEGTAFVIFGIQDGEQR.[I]        | N-Term(iTRAQ4plex)             | 1 | 1 |
| [K].aGDFLEANYMNLQR.[S]           | N-Term(iTRAQ4plex)             | 1 | 1 |
| [K].dFDVPPVVR.[W]                | N-Term(iTRAQ4plex)             | 1 | 1 |
| [R].sYTVAIAGYALAQMGR.[L]         | N-Term(iTRAQ4plex)             | 1 | 1 |
| [R].vELLHNPAFcSLATtk.[R]         | N-Term(iTRAQ4plex); C10(Carbar | 1 | 1 |
| [K].fVTVQATFGTQVVEk.[V]          | N-Term(iTRAQ4plex); K15(iTRAQ  | 1 | 1 |
| [R].sGIPIVTSPIYQHFTk.[T]         | N-Term(iTRAQ4plex); K16(iTRAQ  | 1 | 1 |
| [K].eDIPPADLSDQVPDTESETR.[I]     | N-Term(iTRAQ4plex)             | 1 | 1 |
| [K].kVEGTAFVIFGIQDGEQR.[I]       | N-Term(iTRAQ4plex); K1(iTRAQ4  | 1 | 1 |

|                                   |                                |   |   |
|-----------------------------------|--------------------------------|---|---|
| [R].nTLIIYLDk.[V]                 | N-Term(iTRAQ4plex); K9(iTRAQ4  | 1 | 1 |
| [K].kVEGTAFVIFGIQDGEQR.[I]        | N-Term(iTRAQ4plex); K1(iTRAQ4  | 1 | 1 |
| [R].fISLGEAck.[K]                 | N-Term(iTRAQ4plex); C8(Carbam  | 1 | 1 |
| [K].dYAGVFS DAGLTFTSSSGQQAQR.[A]  | N-Term(iTRAQ4plex)             | 1 | 1 |
| [K].dIcEEQVNSLPGSITk.[A]          | N-Term(iTRAQ4plex); C3(Carbam  | 1 | 1 |
| [R].eGVQkEDIPPADLSDQVPDTESETR.[I] | N-Term(iTRAQ4plex); K5(iTRAQ4  | 1 | 1 |
| [K].vYAYYNLEEScTR.[F]             | N-Term(iTRAQ4plex); C11(Carbar | 1 | 1 |
| [R].rHQQTVTIPPk.[S]               | N-Term(iTRAQ4plex); K11(iTRAQ  | 1 | 1 |
| [K].fVTVQATFGTQVVEk.[V]           | N-Term(iTRAQ4plex); K15(iTRAQ  | 1 | 1 |
| [R].vPVAVQGEDTVQSLTQGDGVAK.[L]    | N-Term(iTRAQ4plex); K22(iTRAQ  | 1 | 1 |
| [K].aDIGcTPGSGk.[D]               | N-Term(iTRAQ4plex); C5(Carbam  | 1 | 1 |
| [K].rAPSTWLTAYVvk.[V]             | N-Term(iTRAQ4plex); K13(iTRAQ  | 1 | 1 |
| [K].sLYVSATVILHSGSDMVQAER.[S]     | N-Term(iTRAQ4plex)             | 1 | 1 |
| [R].yTYLIMNk.[G]                  | N-Term(iTRAQ4plex); K9(iTRAQ4  | 1 | 1 |
| [R].IESEETmVLEAHDAQGDVPVTVVHDFPG  | N-Term(iTRAQ4plex); K30(iTRAQ  | 1 | 1 |
| [R].IESEETmVLEAHDAQGDVPVTVVHDFPG  | N-Term(iTRAQ4plex); M7(Oxidat  | 1 | 1 |
| [K].IVLSSEk.[TL]                  | N-Term(iTRAQ4plex); K7(iTRAQ4  | 1 | 2 |
| [K].DFDFVPPVVR.[W]                |                                | 1 | 1 |
| [R].iSLPEslk.[R]                  | N-Term(iTRAQ4plex); K8(iTRAQ4  | 1 | 1 |
| [R].NTLIIYLDk.[V]                 | K9(iTRAQ4plex)                 | 1 | 1 |
| [K].eNEGFTVTAEGk.[G]              | N-Term(iTRAQ4plex); K12(iTRAQ  | 1 | 1 |
| [K].gQGTLSVVTmYHAK.[A]            | N-Term(iTRAQ4plex); M10(Oxida  | 1 | 1 |
| [R].iPIEDGSGEVVLSR.[K]            | N-Term(iTRAQ4plex)             | 1 | 1 |
| [K].eDIPPADLSDQVPDTESETR.[I]      | N-Term(iTRAQ4plex)             | 1 | 1 |
| [K].sDDkVTLEER.[L]                | N-Term(iTRAQ4plex); K4(iTRAQ4  | 1 | 1 |
| [K].kVEGTAFVIFGIQDGEQR.[I]        | N-Term(iTRAQ4plex); K1(iTRAQ4  | 1 | 1 |
| [R].iSLPEslk.[R]                  | N-Term(iTRAQ4plex); K8(iTRAQ4  | 1 | 1 |
| [K].vLLDGvQNPR.[A]                | N-Term(iTRAQ4plex)             | 1 | 1 |
| [R].iPIEDGSGEVVLSR.[K]            | N-Term(iTRAQ4plex)             | 1 | 1 |
| [K].dYAGVFS DAGLTFTSSSGQQAQR.[A]  | N-Term(iTRAQ4plex)             | 1 | 1 |
| [R].eVVADSVWVDVvk.[D]             | N-Term(iTRAQ4plex); K12(iTRAQ  | 1 | 1 |
| [R].IESEETmVLEAHDAQGDVPVTVVHDFPG  | N-Term(iTRAQ4plex); M7(Oxidat  | 1 | 1 |
| [K].dScVGS LVVk.[S]               | N-Term(iTRAQ4plex); C3(Carbam  | 1 | 1 |
| [K].dSITTWEILAVSmSDk.[K]          | N-Term(iTRAQ4plex); M13(Oxida  | 1 | 1 |
| [R].iSLPEslkR.[I]                 | N-Term(iTRAQ4plex); K8(iTRAQ4  | 1 | 1 |
| [K].eDIPPADLSDQVPDTESETR.[I]      | N-Term(iTRAQ4plex)             | 1 | 1 |
| [K].aAVYHHFISDGVR.[K]             | N-Term(iTRAQ4plex)             | 1 | 1 |
| [R].vELLHNPAFcSLATTk.[R]          | N-Term(iTRAQ4plex); C10(Carbar | 1 | 1 |
| [R].nTLIIYLDk.[V]                 | N-Term(iTRAQ4plex); K9(iTRAQ4  | 1 | 1 |
| [K].RIPIEDGSGEVVLSR.[K]           |                                | 1 | 1 |
| [K].gLEVTITAR.[F]                 | N-Term(iTRAQ4plex)             | 1 | 1 |
| [R].iHWESASLLR.[S]                | N-Term(iTRAQ4plex)             | 1 | 1 |
| [K].sDDkVTLEER.[L]                | N-Term(iTRAQ4plex); K4(iTRAQ4  | 1 | 1 |
| [R].fISLGEAckk.[V]                | N-Term(iTRAQ4plex); C8(Carbam  | 1 | 1 |
| [R].IFTVNHk.[L]                   | K7(iTRAQ4plex)                 | 1 | 1 |
| [K].fVTVQATFGTQVVEk.[V]           | N-Term(iTRAQ4plex); K15(iTRAQ  | 1 | 1 |
| [R].FYHPEkEDGk.[L]                | K6(iTRAQ4plex); K10(iTRAQ4ple  | 1 | 1 |
| [R].fYHPEkEDGk.[L]                | N-Term(iTRAQ4plex); K6(iTRAQ4  | 1 | 1 |
| [K].dYAGVFS DAGLTFTSSSGQQAQR.[A]  | N-Term(iTRAQ4plex)             | 1 | 1 |
| [R].tVmVNIENPEGIPVv.[Q]           | N-Term(iTRAQ4plex); M3(Oxidat  | 1 | 1 |
| [K].tiYTPGSTVLYR.[I]              | N-Term(iTRAQ4plex)             | 1 | 1 |
| [K].sDDkVTLEER.[L]                | N-Term(iTRAQ4plex); K4(iTRAQ4  | 1 | 1 |

|                                   |                               |   |   |
|-----------------------------------|-------------------------------|---|---|
| [R].iFTVNHk.[L]                   | N-Term(iTRAQ4plex); K7(iTRAQ4 | 1 | 1 |
| [R].iSLPESLk.[R]                  | N-Term(iTRAQ4plex); K8(iTRAQ4 | 1 | 1 |
| [K].dlcEEQVNSLPGSITk.[A]          | N-Term(iTRAQ4plex); C3(Carbam | 1 | 1 |
| [R].HQQTVTIPPk.[S]                | K10(iTRAQ4plex)               | 1 | 1 |
| [R].tFISPIk.[C]                   | N-Term(iTRAQ4plex); K7(iTRAQ4 | 1 | 1 |
| [K].vHQYFNVELIQPGAVk.[V]          | N-Term(iTRAQ4plex); K16(iTRAQ | 1 | 1 |
| [R].eALKLEEK.[K]                  | N-Term(iTRAQ4plex); K4(iTRAQ4 | 1 | 1 |
| [K].ISINTHPSQkPLSITVR.[T]         | N-Term(iTRAQ4plex); K10(iTRAQ | 1 | 1 |
| [R].qGALELIK.[K]                  | N-Term(iTRAQ4plex); K8(iTRAQ4 | 1 | 1 |
| [K].fVTVQATFGTQVVEk.[V]           | N-Term(iTRAQ4plex); K15(iTRAQ | 1 | 1 |
| [K].vEGTAFVIFGIQDGEQR.[I]         | N-Term(iTRAQ4plex)            | 1 | 1 |
| [K].IVLSSEk.[TL]                  | N-Term(iTRAQ4plex); K7(iTRAQ4 | 1 | 2 |
| [R].sGIPIVTSPYQIHFTk.[T]          | N-Term(iTRAQ4plex); K16(iTRAQ | 1 | 1 |
| [R].sGIPIVTSPYQIHFTk.[T]          | N-Term(iTRAQ4plex); K16(iTRAQ | 1 | 1 |
| [K].ENEGFTVTAEGk.[G]              | K12(iTRAQ4plex)               | 1 | 1 |
| [K].fYYIYNEk.[G]                  | N-Term(iTRAQ4plex); K8(iTRAQ4 | 1 | 1 |
| [R].IHWESASLLR.[S]                |                               | 1 | 1 |
| [R].NTLIYLDk.[V]                  | K9(iTRAQ4plex)                | 1 | 1 |
| [K].kVEGTAFVIFGIQDGEQR.[I]        | N-Term(iTRAQ4plex); K1(iTRAQ4 | 1 | 1 |
| [K].DTWVEHWPEEDEcQDEENQk.[Q]      | C13(Carbamidomethyl); K20(iTR | 1 | 1 |
| [R].TVMVNIENPEGIPVk.[Q]           | K15(iTRAQ4plex)               | 1 | 1 |
| [R].eVVADSVWVDVk.[D]              | N-Term(iTRAQ4plex); K12(iTRAQ | 1 | 1 |
| [R].hQQTVTIPPk.[S]                | N-Term(iTRAQ4plex); K10(iTRAQ | 1 | 1 |
| [K].fVTVQATFGTQVVEk.[V]           | N-Term(iTRAQ4plex); K15(iTRAQ | 1 | 1 |
| [R].tFISPIk.[C]                   | N-Term(iTRAQ4plex); K7(iTRAQ4 | 1 | 1 |
| [K].aDIGcTPGSGK.[D]               | N-Term(iTRAQ4plex); C5(Carbam | 1 | 1 |
| [K].ADIGcTPGSGk.[D]               | C5(Carbamidomethyl); K11(iTRA | 1 | 1 |
| [R].aEDLVGk.[S]                   | N-Term(iTRAQ4plex); K7(iTRAQ4 | 1 | 1 |
| [R].aSHLGLAR.[S]                  | N-Term(iTRAQ4plex)            | 1 | 1 |
| [K].vLLDGVQNPR.[A]                | N-Term(iTRAQ4plex)            | 1 | 1 |
| [R].iSLPESLkRIPIEDGSGEVLSR.[K]    | N-Term(iTRAQ4plex); K8(iTRAQ4 | 1 | 1 |
| [R].svQLTEk.[R]                   | N-Term(iTRAQ4plex); K7(iTRAQ4 | 1 | 1 |
| [R].yTYLIMNk.[G]                  | N-Term(iTRAQ4plex); K9(iTRAQ4 | 1 | 1 |
| [R].fISLGEAck.[K]                 | N-Term(iTRAQ4plex); C8(Carbam | 1 | 1 |
| [R].fISLGEAck.[K]                 | N-Term(iTRAQ4plex); C8(Carbam | 1 | 1 |
| [K].vEGTAFVIFGIQDGEQR.[I]         | N-Term(iTRAQ4plex)            | 1 | 1 |
| [K].akDQLTcNk.[F]                 | N-Term(iTRAQ4plex); K2(iTRAQ4 | 1 | 1 |
| [R].iPIEDGSGEVLSR.[K]             | N-Term(iTRAQ4plex)            | 1 | 1 |
| [R].vVLVAVDk.[G]                  | N-Term(iTRAQ4plex); K8(iTRAQ4 | 1 | 1 |
| [K].sDDkVTLEER.[L]                | N-Term(iTRAQ4plex); K4(iTRAQ4 | 1 | 1 |
| [K].AAVYHHFISDGVR.[K]             |                               | 1 | 1 |
| [R].fYHPEkedGk.[L]                | N-Term(iTRAQ4plex); K6(iTRAQ4 | 1 | 1 |
| [R].kvLLDGVQNPR.[A]               | N-Term(iTRAQ4plex); K1(iTRAQ4 | 1 | 1 |
| [R].IESEETMVMLEAHDAQGDVPVTVVHDFPG | N-Term(iTRAQ4plex); K30(iTRAQ | 1 | 1 |
| [R].aYYENSPQQVFSTEFVek.[E]        | N-Term(iTRAQ4plex); K18(iTRAQ | 1 | 1 |
| [K].fVTVQATFGTQVVEk.[V]           | N-Term(iTRAQ4plex); K15(iTRAQ | 1 | 1 |
| [K].DFDFVPPVVR.[W]                |                               | 1 | 1 |
| [K].kvFLDccNYITELR.[R]            | K1(iTRAQ4plex); C6(Carbamidon | 1 | 1 |
| [R].aYYENSPQQVFSTEFVek.[E]        | N-Term(iTRAQ4plex); K18(iTRAQ | 1 | 1 |
| [K].dDFVPPVVR.[W]                 | N-Term(iTRAQ4plex)            | 1 | 1 |
| [K].kvFLDccNYITELR.[R]            | N-Term(iTRAQ4plex); C6(Carbam | 1 | 1 |
| [R].nTLIYLDk.[V]                  | N-Term(iTRAQ4plex); K9(iTRAQ4 | 1 | 1 |

|                                  |                                |   |   |
|----------------------------------|--------------------------------|---|---|
| [R].iFTVNHk.[L]                  | N-Term(iTRAQ4plex); K7(iTRAQ4  | 1 | 1 |
| [R].IESEETMVLEAHDAQGDVPVTVVHDFPG | N-Term(iTRAQ4plex); K30(iTRAQ  | 1 | 1 |
| [K].gVFVLNkk.[N]                 | N-Term(iTRAQ4plex); K7(iTRAQ4  | 1 | 1 |
| [K].nTmLElCTR.[Y]                | N-Term(iTRAQ4plex); M3(Oxidati | 1 | 1 |
| [K].akDQLTcNk.[F]                | N-Term(iTRAQ4plex); K2(iTRAQ4  | 1 | 1 |
| [R].aSHLGLAR.[S]                 | N-Term(iTRAQ4plex)             | 1 | 1 |
| [R].kVLLDGVQNP.R.[A]             | N-Term(iTRAQ4plex); K1(iTRAQ4  | 1 | 1 |
| [K].dYAGVFSDAGLTFTSSSGQQAQR.[A]  | N-Term(iTRAQ4plex)             | 1 | 1 |
| [R].tFISPIk.[C]                  | N-Term(iTRAQ4plex); K7(iTRAQ4  | 1 | 1 |
| [R].IFTVNHkLLPVGR.[T]            | K7(iTRAQ4plex)                 | 1 | 1 |
| [R].iPIEDGSGEVLSR.[K]            | N-Term(iTRAQ4plex)             | 1 | 1 |
| [K].tiYTPGSTVLYR.[I]             | N-Term(iTRAQ4plex)             | 1 | 1 |
| [R].iSLPELk.[R]                  | N-Term(iTRAQ4plex); K8(iTRAQ4  | 1 | 1 |
| [R].qGALELk.[K]                  | N-Term(iTRAQ4plex); K8(iTRAQ4  | 1 | 1 |
| [R].svQLTEk.[R]                  | N-Term(iTRAQ4plex); K7(iTRAQ4  | 1 | 1 |
| [K].vLLDGVQNP.R.[A]              | N-Term(iTRAQ4plex)             | 1 | 1 |
| [R].fISLGEAck.[K]                | N-Term(iTRAQ4plex); C8(Carbam  | 1 | 1 |
| [K].EDIPPADLSDQVPDTESETR.[I]     |                                | 1 | 1 |
| [R].qPVPQQmTLk.[I]               | N-Term(iTRAQ4plex); M8(Oxidati | 1 | 1 |
| [R].fISLGEAck.[K]                | N-Term(iTRAQ4plex); C8(Carbam  | 1 | 1 |
| [K].dYAGVFSDAGLTFTSSSGQQAQR.[A]  | N-Term(iTRAQ4plex)             | 1 | 1 |
| [K].ISINTHPSQkPLSITVR.[T]        | N-Term(iTRAQ4plex); K10(iTRAQ  | 1 | 1 |
| [R].hQQTVTIPPk.[S]               | N-Term(iTRAQ4plex); K10(iTRAQ  | 1 | 1 |
| [K].kQELSEAEQATR.[T]             | N-Term(iTRAQ4plex); K1(iTRAQ4  | 1 | 1 |
| [K].dFDFVPPVVR.[W]               | N-Term(iTRAQ4plex)             | 1 | 1 |
| [K].SGSDEVQVQQQR.[T]             |                                | 1 | 1 |
| [K].tiYTPGSTVLYR.[I]             | N-Term(iTRAQ4plex)             | 1 | 1 |
| [R].kVLLDGVQNP.R.[A]             | N-Term(iTRAQ4plex); K1(iTRAQ4  | 1 | 1 |
| [R].LVAYYTLIGASGQR.[E]           |                                | 1 | 1 |
| [R].yTYLIMNk.[G]                 | N-Term(iTRAQ4plex); K9(iTRAQ4  | 1 | 1 |
| [R].fYHPEKEDGk.[L]               | N-Term(iTRAQ4plex); K6(iTRAQ4  | 1 | 1 |
| [R].sEPPEWLWNVEDLkEPPkNGISTk.[L] | N-Term(iTRAQ4plex); K15(iTRAQ  | 1 | 1 |
| [K].dYAGVFSDAGLTFTSSSGQQAQR.[A]  | N-Term(iTRAQ4plex)             | 1 | 1 |
| [R].tVMVNIENPEGIPVv.[Q]          | N-Term(iTRAQ4plex); K15(iTRAQ  | 1 | 1 |
| [R].VVLVAVDk.[G]                 | K8(iTRAQ4plex)                 | 1 | 1 |
| [K].ADIGcTPGSGk.[D]              | C5(Carbamidomethyl); K11(iTRA  | 1 | 1 |
| [K].sDDkVTLEER.[L]               | N-Term(iTRAQ4plex); K4(iTRAQ4  | 1 | 1 |
| [K].dAPDHQELNLDVSLQLPSR.[S]      | N-Term(iTRAQ4plex)             | 1 | 1 |
| [R].IHWESASLLR.[S]               |                                | 1 | 1 |
| [R].sEPPEWLWNVEDLkEPPk.[N]       | N-Term(iTRAQ4plex); K15(iTRAQ  | 1 | 1 |
| [K].DFDFVPPVVR.[W]               |                                | 1 | 1 |
| [K].vLLDGVQNP.R.[A]              | N-Term(iTRAQ4plex)             | 1 | 1 |
| [K].dFDFVPPVVR.[W]               | N-Term(iTRAQ4plex)             | 1 | 1 |
| [R].aEDLVGk.[S]                  | N-Term(iTRAQ4plex); K7(iTRAQ4  | 1 | 1 |
| [K].DFDFVPPVVR.[W]               |                                | 1 | 1 |
| [R].yTYLIMNk.[G]                 | N-Term(iTRAQ4plex); K9(iTRAQ4  | 1 | 1 |
| [K].eDIPPADLSDQVPDTESETR.[I]     | N-Term(iTRAQ4plex)             | 1 | 1 |
| [K].fVTVQATFGTQVVEk.[V]          | N-Term(iTRAQ4plex); K15(iTRAQ  | 1 | 1 |
| [K].gQGTLSVVTmYHAK.[A]           | N-Term(iTRAQ4plex); M10(Oxida  | 1 | 1 |
| [R].iFTVNHk.[L]                  | N-Term(iTRAQ4plex); K7(iTRAQ4  | 1 | 1 |
| [K].TGLQEVEVv.[A]                | K9(iTRAQ4plex)                 | 1 | 1 |
| [K].dQLTcNk.[F]                  | N-Term(iTRAQ4plex); C5(Carbam  | 1 | 1 |

|                                  |                                |   |   |
|----------------------------------|--------------------------------|---|---|
| [K].VLLDGVQNPR.[A]               |                                | 1 | 1 |
| [R].VELLHNPAFCSLATTk.[R]         | C10(Carbamidomethyl); K16(iTR  | 1 | 1 |
| [K].rIPIEDGSGEVLSR.[K]           | N-Term(iTRAQ4plex)             | 1 | 1 |
| [K].IMNIFLk.[D]                  | N-Term(iTRAQ4plex); K7(iTRAQ4  | 1 | 1 |
| [R].NTLIIYLDk.[V]                | K9(iTRAQ4plex)                 | 1 | 1 |
| [R].LVAYYTLIGASGQR.[E]           |                                | 1 | 1 |
| [K].gQGTLSVVTmYHAK.[A]           | N-Term(iTRAQ4plex); M10(Oxida  | 1 | 1 |
| [K].kQELSEAEQATR.[T]             | N-Term(iTRAQ4plex); K1(iTRAQ4  | 1 | 1 |
| [R].iLLQGTPVAQmTEDAVDAER.[L]     | N-Term(iTRAQ4plex); M11(Oxida  | 1 | 1 |
| [R].eALKLEEK.[K]                 | N-Term(iTRAQ4plex); K4(iTRAQ4  | 1 | 1 |
| [K].kVEGTAfVIFGIQDGEQR.[I]       | N-Term(iTRAQ4plex); K1(iTRAQ4  | 1 | 1 |
| [K].fVTVQATFGTQVVEk.[V]          | N-Term(iTRAQ4plex); K15(iTRAQ  | 1 | 1 |
| [R].tkkQELSEAEQATR.[T]           | N-Term(iTRAQ4plex); K2(iTRAQ4  | 1 | 1 |
| [R].iSLPESLk.[R]                 | N-Term(iTRAQ4plex); K8(iTRAQ4  | 1 | 1 |
| [K].aDIGcTPGSGk.[D]              | N-Term(iTRAQ4plex); C5(Carbam  | 1 | 1 |
| [R].fYHPEKEDGk.[L]               | N-Term(iTRAQ4plex); K6(iTRAQ4  | 1 | 1 |
| [R].IeSEETMVLEAHDAQGDVPVTVVHDFPG | N-Term(iTRAQ4plex); K30(iTRAQ  | 1 | 1 |
| [K].IVLSSEk.[TL]                 | N-Term(iTRAQ4plex); K7(iTRAQ4  | 1 | 2 |
| [R].tFISPIk.[C]                  | N-Term(iTRAQ4plex); K7(iTRAQ4  | 1 | 1 |
| [R].IeSEETMVLEAHDAQGDVPVTVVHDFPG | N-Term(iTRAQ4plex); K30(iTRAQ  | 1 | 1 |
| [R].iHWESASLLR.[S]               | N-Term(iTRAQ4plex)             | 1 | 1 |
| [K].sLYVSATVILHSGSDMVQAER.[S]    | N-Term(iTRAQ4plex)             | 1 | 1 |
| [K].EDIPPADLSQVPDTESETR.[I]      |                                | 1 | 1 |
| [R].tELRPGETLNVNFLLR.[M]         | N-Term(iTRAQ4plex)             | 1 | 1 |
| [R].tVmVNIENPEGIPVk.[Q]          | N-Term(iTRAQ4plex); M3(Oxidati | 1 | 1 |
| [K].gVFVLNk.[K]                  | N-Term(iTRAQ4plex); K7(iTRAQ4  | 1 | 1 |
| [R].HQQTVTIPPk.[S]               | K10(iTRAQ4plex)                | 1 | 1 |
| [R].IFTVNHKLLPVGR.[T]            | K7(iTRAQ4plex)                 | 1 | 1 |
| [R].kVLLDGVQNPR.[A]              | N-Term(iTRAQ4plex); K1(iTRAQ4  | 1 | 1 |
| [R].sVQLTEk.[R]                  | N-Term(iTRAQ4plex); K7(iTRAQ4  | 1 | 1 |
| [R].qGALELIk.[K]                 | N-Term(iTRAQ4plex); K8(iTRAQ4  | 1 | 1 |
| [K].EDIPPADLSQVPDTESETR.[I]      |                                | 1 | 1 |
| [R].FISLGEAck.[K]                | C8(Carbamidomethyl); K9(iTRAC  | 1 | 1 |
| [K].aAVYHHFISDGVR.[K]            | N-Term(iTRAQ4plex)             | 1 | 1 |
| [K].aKDQLTcNk.[F]                | N-Term(iTRAQ4plex); C7(Carbam  | 1 | 1 |
| [R].vELLHNPAFCSLATTkR.[R]        | N-Term(iTRAQ4plex); C10(Carbar | 1 | 1 |
| [R].IHWESASLLR.[S]               |                                | 1 | 1 |
| [K].acEPGVdYVyk.[T]              | N-Term(iTRAQ4plex); C2(Carbam  | 1 | 1 |
| [R].aEDLVGk.[S]                  | N-Term(iTRAQ4plex); K7(iTRAQ4  | 1 | 1 |
| [K].eDIPPADLSQVPDTESETR.[I]      | N-Term(iTRAQ4plex)             | 1 | 1 |
| [R].sVQLTEk.[R]                  | N-Term(iTRAQ4plex); K7(iTRAQ4  | 1 | 1 |
| [R].fISLGEAck.[K]                | N-Term(iTRAQ4plex); C8(Carbam  | 1 | 1 |
| [K].IWDVVEk.[A]                  | K7(iTRAQ4plex)                 | 1 | 1 |
| [K].fYYIYNEk.[G]                 | N-Term(iTRAQ4plex); K8(iTRAQ4  | 1 | 1 |
| [R].aYYENSPQQVFSTEFVek.[E]       | N-Term(iTRAQ4plex); K18(iTRAQ  | 1 | 1 |
| [R].tVMVNIENPEGIPVk.[Q]          | N-Term(iTRAQ4plex); K15(iTRAQ  | 1 | 1 |
| [K].eDIPPADLSQVPDTESETR.[I]      | N-Term(iTRAQ4plex)             | 1 | 1 |
| [K].EDIPPADLSQVPDTESETR.[I]      |                                | 1 | 1 |
| [R].IDkAcEPGVdYVykTR.[L]         | N-Term(iTRAQ4plex); K3(iTRAQ4  | 1 | 1 |
| [R].VELLHNPAFCSLATTk.[R]         | C10(Carbamidomethyl); K16(iTR  | 1 | 1 |
| [K].TGLQEVEVk.[A]                | K9(iTRAQ4plex)                 | 1 | 1 |
| [R].HQQTVTIPPk.[S]               | K10(iTRAQ4plex)                | 1 | 1 |

|                                   |                                |   |   |
|-----------------------------------|--------------------------------|---|---|
| [K].IVLSSEK.[TL]                  | N-Term(iTRAQ4plex); K7(iTRAQ4  | 1 | 2 |
| [K].aDIGcTPGSGk.[D]               | N-Term(iTRAQ4plex); C5(Carbam  | 1 | 1 |
| [K].aDIGcTPGSGk.[D]               | N-Term(iTRAQ4plex); C5(Carbam  | 1 | 1 |
| [R].fYHPEkEDGk.[L]                | N-Term(iTRAQ4plex); K6(iTRAQ4  | 1 | 1 |
| [K].IVLSSEK.[TL]                  | N-Term(iTRAQ4plex); K7(iTRAQ4  | 1 | 2 |
| [R].fYHPEkEDGk.[L]                | N-Term(iTRAQ4plex); K6(iTRAQ4  | 1 | 1 |
| [K].fVTVQATFGTQVVEk.[V]           | N-Term(iTRAQ4plex); K15(iTRAQ  | 1 | 1 |
| [R].iFTVNHk.[L]                   | N-Term(iTRAQ4plex); K7(iTRAQ4  | 1 | 1 |
| [R].yTYLIMNk.[G]                  | N-Term(iTRAQ4plex); K9(iTRAQ4  | 1 | 1 |
| [K].sGSDEVQVGQQR.[T]              | N-Term(iTRAQ4plex)             | 1 | 1 |
| [K].gVFVLNk.[K]                   | N-Term(iTRAQ4plex); K7(iTRAQ4  | 1 | 1 |
| [K].IVLSSEK.[TL]                  | N-Term(iTRAQ4plex); K7(iTRAQ4  | 1 | 2 |
| [R].seETkENEGFTVTAEGk.[G]         | N-Term(iTRAQ4plex); K5(iTRAQ4  | 1 | 1 |
| [R].ISLPESLk.[R]                  | K8(iTRAQ4plex)                 | 1 | 1 |
| [K].kLVLSSEK.[T]                  | N-Term(iTRAQ4plex); K1(iTRAQ4  | 1 | 1 |
| [K].gQGTLSVVTmYHAK.[A]            | N-Term(iTRAQ4plex); M10(Oxida  | 1 | 1 |
| [R].VVLVAVDk.[G]                  | K8(iTRAQ4plex)                 | 1 | 1 |
| [R].ISLPESLk.[R]                  | K8(iTRAQ4plex)                 | 1 | 1 |
| [K].dTWVEHWPEDEcQDEENQk.[Q]       | N-Term(iTRAQ4plex); C13(Carbar | 1 | 1 |
| [R].tVMVNIENPEGIPVk.[Q]           | N-Term(iTRAQ4plex); K15(iTRAQ  | 1 | 1 |
| [K].fVTVQATFGTQVVEk.[V]           | N-Term(iTRAQ4plex); K15(iTRAQ  | 1 | 1 |
| [K].vTIkPAPETEK.[R]               | N-Term(iTRAQ4plex); K4(iTRAQ4  | 1 | 1 |
| [K].sGSDEVQVGQQR.[T]              | N-Term(iTRAQ4plex)             | 1 | 1 |
| [R].sEFPESWLWNVEDLkEPPkNGISTk.[L] | N-Term(iTRAQ4plex); K15(iTRAQ  | 1 | 1 |
| [K].iWDVVEk.[A]                   | N-Term(iTRAQ4plex); K7(iTRAQ4  | 1 | 1 |
| [R].hQQTVTIPPk.[S]                | N-Term(iTRAQ4plex); K10(iTRAQ  | 1 | 1 |
| [R].TkkQELSEAEQATR.[T]            | K2(iTRAQ4plex); K3(iTRAQ4plex) | 1 | 1 |
| [K].sGSDEVQVGQQR.[T]              | N-Term(iTRAQ4plex)             | 1 | 1 |
| [K].dQLTcNk.[F]                   | N-Term(iTRAQ4plex); C5(Carbam  | 1 | 1 |
| [R].iSLPESLk.[R]                  | N-Term(iTRAQ4plex); K8(iTRAQ4  | 1 | 1 |
| [K].tGLQEVEVk.[A]                 | N-Term(iTRAQ4plex); K9(iTRAQ4  | 1 | 1 |
| [R].VPVAVQGEDTVQSLTQGDGVAK.[L]    | K22(iTRAQ4plex)                | 1 | 1 |
| [K].gVFVLNk.[K]                   | N-Term(iTRAQ4plex); K7(iTRAQ4  | 1 | 1 |
| [R].iFTVNHk.[L]                   | N-Term(iTRAQ4plex); K7(iTRAQ4  | 1 | 1 |
| [R].sVQLTEk.[R]                   | N-Term(iTRAQ4plex); K7(iTRAQ4  | 1 | 1 |
| [K].LVLSSSEK.[TL]                 | K7(iTRAQ4plex)                 | 1 | 2 |
| [K].kVEGTAFVIFGIQDGEQR.[I]        | N-Term(iTRAQ4plex); K1(iTRAQ4  | 1 | 1 |
| [K].vLLDGvQNPR.[A]                | N-Term(iTRAQ4plex)             | 1 | 1 |
| [R].qPSSAFAAFVk.[R]               | N-Term(iTRAQ4plex); K11(iTRAQ  | 1 | 1 |
| [R].vPVAVQGEDTVQSLTQGDGVAK.[L]    | N-Term(iTRAQ4plex); K22(iTRAQ  | 1 | 1 |
| [K].akDQLTcNk.[F]                 | N-Term(iTRAQ4plex); K2(iTRAQ4  | 1 | 1 |
| [K].kVEGTAFVIFGIQDGEQR.[I]        | N-Term(iTRAQ4plex); K1(iTRAQ4  | 1 | 1 |
| [K].iWDVVEk.[A]                   | N-Term(iTRAQ4plex); K7(iTRAQ4  | 1 | 1 |
| [K].iWDVVEk.[A]                   | N-Term(iTRAQ4plex); K7(iTRAQ4  | 1 | 1 |
| [K].gLEVTITAR.[F]                 | N-Term(iTRAQ4plex)             | 1 | 1 |
| [R].IVAYYTLIGASGQR.[E]            | N-Term(iTRAQ4plex)             | 1 | 1 |
| [R].fYHPEkEDGk.[L]                | N-Term(iTRAQ4plex); K6(iTRAQ4  | 1 | 1 |
| [K].nTmILEIcTR.[Y]                | N-Term(iTRAQ4plex); M3(Oxidat  | 1 | 1 |
| [R].IHWESASLLR.[S]                |                                | 1 | 1 |
| [R].IESEETMVLEAHDAQGDVPVTVVHDFPG  | N-Term(iTRAQ4plex); K30(iTRAQ  | 1 | 1 |
| [K].dScVGLVVK.[S]                 | N-Term(iTRAQ4plex); C3(Carbam  | 1 | 1 |
| [R].yTYLImNk.[G]                  | N-Term(iTRAQ4plex); M7(Oxidat  | 1 | 1 |

|                                   |                                          |   |   |
|-----------------------------------|------------------------------------------|---|---|
| [R].vPVAVQGEDTVQSLTQGDGVak.[L]    | N-Term(iTRAQ4plex); K22(iTRAQ4plex)      | 1 | 1 |
| [K].AcEPGVDYVYkTR.[L]             | C2(Carbamidomethyl); K11(iTRAQ4plex)     | 1 | 1 |
| [K].eNEGFTVTAEGk.[G]              | N-Term(iTRAQ4plex); K12(iTRAQ4plex)      | 1 | 1 |
| [K].DFDFVPPVVR.[W]                |                                          | 1 | 1 |
| [K].qcQDLGAFTEsmVFGcPN.[-]        | N-Term(iTRAQ4plex); C2(Carbamidomethyl)  | 1 | 1 |
| [K].dFDFVPPVVR.[W]                | N-Term(iTRAQ4plex)                       | 1 | 1 |
| [K].fVTVQATFGTQVVEk.[V]           | N-Term(iTRAQ4plex); K15(iTRAQ4plex)      | 1 | 1 |
| [K].ImNIFlk.[D]                   | N-Term(iTRAQ4plex); M2(Oxidation)        | 1 | 1 |
| [K].ISINTHPSQkPLSITVR.[T]         | N-Term(iTRAQ4plex)                       | 1 | 1 |
| [K].dYAGVFSdagLTFTSSGQQAQR.[A]    | N-Term(iTRAQ4plex)                       | 1 | 1 |
| [K].fVTVQATFGTQVVEk.[V]           | N-Term(iTRAQ4plex); K15(iTRAQ4plex)      | 1 | 1 |
| [K].sLYVSATVILHSGSDMVQAER.[S]     | N-Term(iTRAQ4plex)                       | 1 | 1 |
| [R].IESEETMvLEAHDAQGDVPVTVTVHDFPG | N-Term(iTRAQ4plex); K30(iTRAQ4plex)      | 1 | 1 |
| [K].kGYTQQLaFR.[Q]                | N-Term(iTRAQ4plex); K1(iTRAQ4plex)       | 1 | 1 |
| [K].sDDkvtLEER.[L]                | N-Term(iTRAQ4plex); K4(iTRAQ4plex)       | 1 | 1 |
| [K].gVFVLNk.[K]                   | N-Term(iTRAQ4plex); K7(iTRAQ4plex)       | 1 | 1 |
| [K].gLEVTITAR.[F]                 | N-Term(iTRAQ4plex)                       | 1 | 1 |
| [K].sDDkvtLEER.[L]                | N-Term(iTRAQ4plex); K4(iTRAQ4plex)       | 1 | 1 |
| [K].TGLQEVEVk.[A]                 | K9(iTRAQ4plex)                           | 1 | 1 |
| [K].iWDVVEk.[A]                   | N-Term(iTRAQ4plex); K7(iTRAQ4plex)       | 1 | 1 |
| [R].tFISPIk.[C]                   | N-Term(iTRAQ4plex); K7(iTRAQ4plex)       | 1 | 1 |
| [K].IVLSSEk.[TL]                  | N-Term(iTRAQ4plex); K7(iTRAQ4plex)       | 1 | 2 |
| [K].nTMILEIcTR.[Y]                | N-Term(iTRAQ4plex); C8(Carbamidomethyl)  | 1 | 1 |
| [K].fYYIYNEk.[G]                  | N-Term(iTRAQ4plex); K8(iTRAQ4plex)       | 1 | 1 |
| [K].AcEPGVDYVYk.[T]               | C2(Carbamidomethyl); K11(iTRAQ4plex)     | 1 | 1 |
| [K].vYAYYNLEEScTR.[F]             | N-Term(iTRAQ4plex); C11(Carbamidomethyl) | 1 | 1 |
| [K].nTmILEIcTR.[Y]                | N-Term(iTRAQ4plex); M3(Oxidation)        | 1 | 1 |
| [K].acEPGVDYVYkTR.[L]             | N-Term(iTRAQ4plex); C2(Carbamidomethyl)  | 1 | 1 |
| [R].iFTVNHk.[L]                   | N-Term(iTRAQ4plex); K7(iTRAQ4plex)       | 1 | 1 |
| [R].iFTVNHk.[L]                   | N-Term(iTRAQ4plex); K7(iTRAQ4plex)       | 1 | 1 |
| [K].rAPSTWLTAYVvK.[V]             | N-Term(iTRAQ4plex); K13(iTRAQ4plex)      | 1 | 1 |
| [R].iHWESASLLR.[S]                | N-Term(iTRAQ4plex)                       | 1 | 1 |
| [R].TVMVNIENPEGIPVk.[Q]           | K15(iTRAQ4plex)                          | 1 | 1 |
| [K].NTMILEIcTR.[Y]                | C8(Carbamidomethyl)                      | 1 | 1 |
| [R].eVVADSVWVDVk.[D]              | N-Term(iTRAQ4plex); K12(iTRAQ4plex)      | 1 | 1 |
| [K].iWDVVEk.[A]                   | N-Term(iTRAQ4plex); K7(iTRAQ4plex)       | 1 | 1 |
| [K].dQLTcNk.[F]                   | N-Term(iTRAQ4plex); C5(Carbamidomethyl)  | 1 | 1 |
| [K].dIcEEQVNSLPGSITk.[A]          | N-Term(iTRAQ4plex); C3(Carbamidomethyl)  | 1 | 1 |
| [K].rQGALELIk.[K]                 | N-Term(iTRAQ4plex); K9(iTRAQ4plex)       | 1 | 1 |
| [R].yTYLImNk.[G]                  | N-Term(iTRAQ4plex); M7(Oxidation)        | 1 | 1 |
| [R].YYTYLIMNk.[G]                 | K9(iTRAQ4plex)                           | 1 | 1 |
| [K].EDIPPADLSdqVPDTESETR.[I]      |                                          | 1 | 1 |
| [R].iSLPEslk.[R]                  | N-Term(iTRAQ4plex); K8(iTRAQ4plex)       | 1 | 1 |
| [R].HQQTVTIPPk.[S]                | K10(iTRAQ4plex)                          | 1 | 1 |
| [K].aDIGcTPGSGk.[D]               | N-Term(iTRAQ4plex); C5(Carbamidomethyl)  | 1 | 1 |
| [K].kvFLDccNYITELR.[R]            | N-Term(iTRAQ4plex); K1(iTRAQ4plex)       | 1 | 1 |
| [R].iSLPEslk.[R]                  | N-Term(iTRAQ4plex); K8(iTRAQ4plex)       | 1 | 1 |
| [K].ISINTHPSQkPLSITVR.[T]         | N-Term(iTRAQ4plex); K10(iTRAQ4plex)      | 1 | 1 |
| [K].fYYIYNEk.[G]                  | N-Term(iTRAQ4plex); K8(iTRAQ4plex)       | 1 | 1 |
| [R].nTLIIYLDk.[V]                 | N-Term(iTRAQ4plex); K9(iTRAQ4plex)       | 1 | 1 |
| [K].vLLDGvQNPR.[A]                | N-Term(iTRAQ4plex)                       | 1 | 1 |
| [R].vVLVAVDk.[G]                  | N-Term(iTRAQ4plex); K8(iTRAQ4plex)       | 1 | 1 |



|                                   |                                |   |   |
|-----------------------------------|--------------------------------|---|---|
| [K].iWDVVEK.[A]                   | N-Term(iTRAQ4plex); K7(iTRAQ4  | 1 | 1 |
| [K].ENEGFTVTAEGK.[G]              | K12(iTRAQ4plex)                | 1 | 1 |
| [K].GYTQQLAFR.[Q]                 |                                | 1 | 1 |
| [R].svQLTEK.[R]                   | N-Term(iTRAQ4plex); K7(iTRAQ4  | 1 | 1 |
| [K].kVEGTAFVIFGIQDGEQR.[I]        | N-Term(iTRAQ4plex); K1(iTRAQ4  | 1 | 1 |
| [R].aEDLVGK.[S]                   | N-Term(iTRAQ4plex); K7(iTRAQ4  | 1 | 1 |
| [K].sLYVSATVILHSGSDMVQAER.[S]     | N-Term(iTRAQ4plex)             | 1 | 1 |
| [R].sEFPEswLWNVEDLkEPPkNGISTk.[L] | N-Term(iTRAQ4plex); K15(iTRAQ  | 1 | 1 |
| [K].akDQLTcNk.[F]                 | N-Term(iTRAQ4plex); K2(iTRAQ4  | 1 | 1 |
| [K].LSINTHPSQkPLSITVR.[T]         | K10(iTRAQ4plex)                | 1 | 1 |
| [K].gVFVLNk.[K]                   | N-Term(iTRAQ4plex); K7(iTRAQ4  | 1 | 1 |
| [K].gLEVTITAR.[F]                 | N-Term(iTRAQ4plex)             | 1 | 1 |
| [R].qPVPGQQMTLkIEGDHGAR.[V]       | N-Term(iTRAQ4plex); K11(iTRAQ  | 1 | 1 |
| [K].kGYTQQLAFR.[Q]                | N-Term(iTRAQ4plex); K1(iTRAQ4  | 1 | 1 |
| [K].tGLQEVEVK.[A]                 | N-Term(iTRAQ4plex)             | 1 | 1 |
| [K].qcQDLGAFTEsmVVFgCpN.[-]       | N-Term(iTRAQ4plex); C2(Carbam  | 1 | 1 |
| [R].LESEETMVLEAHDAQGDVPVTVVHDFPG  | K30(iTRAQ4plex)                | 1 | 1 |
| [K].acEPGVDYVYk.[T]               | N-Term(iTRAQ4plex); C2(Carbam  | 1 | 1 |
| [R].nTLIIYLDk.[V]                 | N-Term(iTRAQ4plex); K9(iTRAQ4  | 1 | 1 |
| [R].iLLQGTPVAQmTEDAVDAER.[L]      | N-Term(iTRAQ4plex); M11(Oxida  | 1 | 1 |
| [R].fiSLGEAckk.[V]                | N-Term(iTRAQ4plex); C8(Carbam  | 1 | 1 |
| [R].iLLQGTPVAQmTEDAVDAER.[L]      | N-Term(iTRAQ4plex); M11(Oxida  | 1 | 1 |
| [K].kGYTQQLAFR.[Q]                | N-Term(iTRAQ4plex); K1(iTRAQ4  | 1 | 1 |
| [K].vHQYFNVELIQPGAVk.[V]          | N-Term(iTRAQ4plex); K16(iTRAQ  | 1 | 1 |
| [K].iWDVVEK.[A]                   | K7(iTRAQ4plex)                 | 1 | 1 |
| [R].iSLPEsLkR.[I]                 | K8(iTRAQ4plex)                 | 1 | 1 |
| [K].GQGTLsVVtMYHak.[A]            | K14(iTRAQ4plex)                | 1 | 1 |
| [K].VTIkPAPETEk.[R]               | K4(iTRAQ4plex); K11(iTRAQ4ple  | 1 | 1 |
| [K].eDIPPADLSDQVPDTESETR.[I]      | N-Term(iTRAQ4plex)             | 1 | 1 |
| [K].EDIPPADLSDQVPDTESETR.[I]      |                                | 1 | 1 |
| [K].TGLQEVEVK.[A]                 | K9(iTRAQ4plex)                 | 1 | 1 |
| [K].TGLQEVEVK.[A]                 | K9(iTRAQ4plex)                 | 1 | 1 |
| [R].IESEETMVLEAHDAQGDVPVTVVHDFPG  | N-Term(iTRAQ4plex); K30(iTRAQ  | 1 | 1 |
| [R].kVLLDGVQNP.R.[A]              | N-Term(iTRAQ4plex)             | 1 | 1 |
| [R].qGALELIk.[K]                  | N-Term(iTRAQ4plex); K8(iTRAQ4  | 1 | 1 |
| [K].iVLsSEk.[TL]                  | N-Term(iTRAQ4plex); K7(iTRAQ4  | 1 | 2 |
| [R].iVAYYTLIGASGQR.[E]            | N-Term(iTRAQ4plex)             | 1 | 1 |
| [K].EDIPPADLSDQVPDTESETR.[I]      |                                | 1 | 1 |
| [K].kVEGTAFVIFGIQDGEQR.[I]        | N-Term(iTRAQ4plex); K1(iTRAQ4  | 1 | 1 |
| [K].acEPGVDYVYk.[T]               | N-Term(iTRAQ4plex); C2(Carbam  | 1 | 1 |
| [R].kVLLDGVQNP.R.[A]              | K1(iTRAQ4plex)                 | 1 | 1 |
| [R].tFISPIk.[C]                   | N-Term(iTRAQ4plex); K7(iTRAQ4  | 1 | 1 |
| [K].iWDVVEK.[A]                   | N-Term(iTRAQ4plex); K7(iTRAQ4  | 1 | 1 |
| [R].vVLVAVDk.[G]                  | N-Term(iTRAQ4plex); K8(iTRAQ4  | 1 | 1 |
| [K].dQLTcNk.[F]                   | N-Term(iTRAQ4plex); C5(Carbam  | 1 | 1 |
| [R].QPSSAFAAFVk.[R]               | K11(iTRAQ4plex)                | 1 | 1 |
| [K].iSINTHPSQkPLSITVR.[T]         | N-Term(iTRAQ4plex); K10(iTRAQ  | 1 | 1 |
| [R].svQLTEK.[R]                   | N-Term(iTRAQ4plex); K7(iTRAQ4  | 1 | 1 |
| [R].sNLDEDIIAEENIVSR.[S]          | N-Term(iTRAQ4plex)             | 1 | 1 |
| [K].sLYVSATVILHSGSDMVQAER.[S]     | N-Term(iTRAQ4plex)             | 1 | 1 |
| [R].YYTYLIImNk.[G]                | M7(Oxidation); K9(iTRAQ4plex)  | 1 | 1 |
| [R].LkGPLLNk.[F]                  | K2(iTRAQ4plex); K8(iTRAQ4plex) | 1 | 1 |

|                                  |                                          |   |   |
|----------------------------------|------------------------------------------|---|---|
| [K].DIcEEQVNSLPGSITk.[A]         | C3(Carbamidomethyl); K16(iTRAQ4plex)     | 1 | 1 |
| [K].kVEGTAfVIFGIQDGEQR.[I]       | N-Term(iTRAQ4plex); K1(iTRAQ4plex)       | 1 | 1 |
| [K].fYYIYNEk.[G]                 | N-Term(iTRAQ4plex); K8(iTRAQ4plex)       | 1 | 1 |
| [K].EDIPPADLSdqVpDTESETR.[I]     |                                          | 1 | 1 |
| [K].vTIkPAPETEk.[R]              | N-Term(iTRAQ4plex); K4(iTRAQ4plex)       | 1 | 1 |
| [K].sSLSVPYVIVPLK.[T]            | N-Term(iTRAQ4plex)                       | 1 | 1 |
| [R].qPVPgQqMtlk.[I]              | N-Term(iTRAQ4plex); M8(Oxidation)        | 1 | 1 |
| [R].tELRPGETLNVNfLLR.[M]         | N-Term(iTRAQ4plex)                       | 1 | 1 |
| [K].dQLTcNk.[F]                  | N-Term(iTRAQ4plex); C5(Carbamidomethyl)  | 1 | 1 |
| [R].iSLPEsLk.[R]                 | N-Term(iTRAQ4plex); K8(iTRAQ4plex)       | 1 | 1 |
| [R].iFTVNHk.[L]                  | N-Term(iTRAQ4plex); K7(iTRAQ4plex)       | 1 | 1 |
| [K].dFDfVPPVVR.[W]               | N-Term(iTRAQ4plex)                       | 1 | 1 |
| [R].hQQTVTIppk.[S]               | N-Term(iTRAQ4plex); K10(iTRAQ4plex)      | 1 | 1 |
| [K].nkLTQSk.[IV]                 | N-Term(iTRAQ4plex); K2(iTRAQ4plex)       | 1 | 2 |
| [K].dYAGVfSDAGLTfTSSSGQQTAQR.[A] | N-Term(iTRAQ4plex)                       | 1 | 1 |
| [K].fYYIYNEk.[G]                 | K8(iTRAQ4plex)                           | 1 | 1 |
| [K].GYTQQLAFR.[Q]                |                                          | 1 | 1 |
| [K].gVFVLNk.[K]                  | N-Term(iTRAQ4plex); K7(iTRAQ4plex)       | 1 | 1 |
| [R].FYHPEkEDGk.[L]               | K6(iTRAQ4plex); K10(iTRAQ4plex)          | 1 | 1 |
| [K].gVFVLNk.[K]                  | N-Term(iTRAQ4plex); K7(iTRAQ4plex)       | 1 | 1 |
| [K].fVTVQATfGTQVVEk.[V]          | N-Term(iTRAQ4plex); K15(iTRAQ4plex)      | 1 | 1 |
| [K].sDDkVTLER.[L]                | N-Term(iTRAQ4plex); K4(iTRAQ4plex)       | 1 | 1 |
| [K].kQELSEAEQATR.[T]             | N-Term(iTRAQ4plex); K1(iTRAQ4plex)       | 1 | 1 |
| [K].qkPDGVfQEDAPVIHQEMIGGLR.[N]  | N-Term(iTRAQ4plex); K2(iTRAQ4plex)       | 1 | 1 |
| [R].VVLVAVDk.[G]                 | K8(iTRAQ4plex)                           | 1 | 1 |
| [R].VVLVAVDk.[G]                 | K8(iTRAQ4plex)                           | 1 | 1 |
| [K].dYAGVfSDAGLTfTSSSGQQTAQR.[A] | N-Term(iTRAQ4plex)                       | 1 | 1 |
| [R].YYTYLImNk.[G]                | M7(Oxidation); K9(iTRAQ4plex)            | 1 | 1 |
| [R].IHWESASLLR.[S]               |                                          | 1 | 1 |
| [K].fVTVQATfGTQVVEk.[V]          | N-Term(iTRAQ4plex); K15(iTRAQ4plex)      | 1 | 1 |
| [R].sNLDEDIIAEENIVSR.[S]         | N-Term(iTRAQ4plex)                       | 1 | 1 |
| [R].svQLTEk.[R]                  | N-Term(iTRAQ4plex); K7(iTRAQ4plex)       | 1 | 1 |
| [R].eVVADSVWVDVk.[D]             | N-Term(iTRAQ4plex); K12(iTRAQ4plex)      | 1 | 1 |
| [K].ISINThPSQkPLSITVR.[T]        | N-Term(iTRAQ4plex); K10(iTRAQ4plex)      | 1 | 1 |
| [R].yTYLIMNk.[G]                 | N-Term(iTRAQ4plex); K9(iTRAQ4plex)       | 1 | 1 |
| [K].dTWVEHWPEEDeCQDEENQk.[Q]     | N-Term(iTRAQ4plex); C13(Carbamidomethyl) | 1 | 1 |
| [K].TGLQEVVek.[A]                | K9(iTRAQ4plex)                           | 1 | 1 |
| [K].kVEGTAfVIFGIQDGEQR.[I]       | N-Term(iTRAQ4plex); K1(iTRAQ4plex)       | 1 | 1 |
| [R].tVMVNIENPEGIPVk.[Q]          | N-Term(iTRAQ4plex); K15(iTRAQ4plex)      | 1 | 1 |
| [K].dAPDHQELNLDVSLQLPSR.[S]      | N-Term(iTRAQ4plex)                       | 1 | 1 |
| [K].nTMILEICtr.[Y]               | N-Term(iTRAQ4plex); C8(Carbamidomethyl)  | 1 | 1 |
| [K].vFLDccNYITELR.[R]            | N-Term(iTRAQ4plex); C5(Carbamidomethyl)  | 1 | 1 |
| [R].HQQTVTIppk.[S]               | K10(iTRAQ4plex)                          | 1 | 1 |
| [R].kVLLDGVQNPV.[A]              | N-Term(iTRAQ4plex); K1(iTRAQ4plex)       | 1 | 1 |
| [K].EDIPPADLSdqVpDTESETR.[I]     |                                          | 1 | 1 |
| [K].dQLTcNk.[F]                  | N-Term(iTRAQ4plex); C5(Carbamidomethyl)  | 1 | 1 |
| [R].svQLTEKR.[M]                 |                                          | 1 | 1 |
| [R].svQLTEk.[R]                  | N-Term(iTRAQ4plex); K7(iTRAQ4plex)       | 1 | 1 |
| [K].acEPGVDYVYkTR.[L]            | N-Term(iTRAQ4plex); C2(Carbamidomethyl)  | 1 | 1 |
| [K].ISINThPSQkPLSITVR.[T]        | N-Term(iTRAQ4plex); K10(iTRAQ4plex)      | 1 | 1 |
| [R].sYTVAIAGYALAQMGV.[L]         | N-Term(iTRAQ4plex)                       | 1 | 1 |
| [K].kQELSEAEQATR.[T]             | N-Term(iTRAQ4plex); K1(iTRAQ4plex)       | 1 | 1 |

|                                  |                                |   |   |
|----------------------------------|--------------------------------|---|---|
| [R].ILLQGTPVAQMTEDAVIDAER.[L]    |                                | 1 | 1 |
| [K].IVLSSEK.[TL]                 | N-Term(iTRAQ4plex); K7(iTRAQ4  | 1 | 2 |
| [R].yYTYLImNk.[G]                | N-Term(iTRAQ4plex); M7(Oxidati | 1 | 1 |
| [R].IVAYYTLIGASGQR.[E]           | N-Term(iTRAQ4plex)             | 1 | 1 |
| [K].LMNIFLk.[D]                  | K7(iTRAQ4plex)                 | 1 | 1 |
| [R].TVMVNIENPEGIPvk.[Q]          | K15(iTRAQ4plex)                | 1 | 1 |
| [K].iEGDHGAR.[V]                 | N-Term(iTRAQ4plex)             | 1 | 1 |
| [R].cAEENcFIQk.[S]               | C1(Carbamidomethyl); C6(Carba  | 1 | 1 |
| [R].IFTVNHk.[L]                  | K7(iTRAQ4plex)                 | 1 | 1 |
| [K].aGDFLEANYMNLQR.[S]           | N-Term(iTRAQ4plex)             | 1 | 1 |
| [R].kVLLDGVQNPk.[A]              | N-Term(iTRAQ4plex)             | 1 | 1 |
| [K].gYTQQLAFR.[Q]                | N-Term(iTRAQ4plex)             | 1 | 1 |
| [R].kVLLDGVQNPk.[A]              | K1(iTRAQ4plex)                 | 1 | 1 |
| [K].IMNIFLk.[D]                  | N-Term(iTRAQ4plex); K7(iTRAQ4  | 1 | 1 |
| [K].iWDVVEk.[A]                  | N-Term(iTRAQ4plex); K7(iTRAQ4  | 1 | 1 |
| [K].sGSDEVQVQQR.[T]              | N-Term(iTRAQ4plex)             | 1 | 1 |
| [K].kVEGTAFVIFGIQDGEQR.[I]       | N-Term(iTRAQ4plex); K1(iTRAQ4  | 1 | 1 |
| [K].IWDVVEk.[A]                  | K7(iTRAQ4plex)                 | 1 | 1 |
| [R].IHWESASLLR.[S]               |                                | 1 | 1 |
| [K].gLEVTITAR.[F]                | N-Term(iTRAQ4plex)             | 1 | 1 |
| [R].iFTVNHk.[L]                  | N-Term(iTRAQ4plex); K7(iTRAQ4  | 1 | 1 |
| [R].qGALELIK.[K]                 | N-Term(iTRAQ4plex); K8(iTRAQ4  | 1 | 1 |
| [K].gLEVTITAR.[F]                | N-Term(iTRAQ4plex)             | 1 | 1 |
| [R].sEFPEswLWNVEDLkEPPk.[N]      | N-Term(iTRAQ4plex); K15(iTRAQ  | 1 | 1 |
| [K].EDIPPADLSQVDPTESETR.[I]      |                                | 1 | 1 |
| [R].LESEETMVLEAHDAQGDVPVTVVHDFPG | K30(iTRAQ4plex)                | 1 | 1 |
| [K].aAVYHHFISDGVR.[K]            | N-Term(iTRAQ4plex)             | 1 | 1 |
| [R].RHQQTVTIPPk.[S]              | K11(iTRAQ4plex)                | 1 | 1 |
| [K].gLEVTITAR.[F]                | N-Term(iTRAQ4plex)             | 1 | 1 |
| [K].kVFLDccNYITELR.[R]           | N-Term(iTRAQ4plex); K1(iTRAQ4  | 1 | 1 |
| [R].iFTVNHk.[L]                  | N-Term(iTRAQ4plex); K7(iTRAQ4  | 1 | 1 |
| [K].acEPGVDYVyk.[T]              | N-Term(iTRAQ4plex); C2(Carbam  | 1 | 1 |
| [K].aAVYHHFISDGVR.[K]            | N-Term(iTRAQ4plex)             | 1 | 1 |
| [R].eVVADSVWVDVvk.[D]            | N-Term(iTRAQ4plex); K12(iTRAQ  | 1 | 1 |
| [R].kVLLDGVQNPk.[A]              | N-Term(iTRAQ4plex); K1(iTRAQ4  | 1 | 1 |
| [K].eDIPPADLSQVDPTESETR.[I]      | N-Term(iTRAQ4plex)             | 1 | 1 |
| [R].IHWESASLLR.[S]               |                                | 1 | 1 |
| [R].svQLTEk.[R]                  | N-Term(iTRAQ4plex); K7(iTRAQ4  | 1 | 1 |
| [K].kLVLSSEK.[T]                 | K1(iTRAQ4plex); K8(iTRAQ4plex) | 1 | 1 |
| [K].aGDFLEANYMNLQR.[S]           | N-Term(iTRAQ4plex)             | 1 | 1 |
| [K].kLVLSSEK.[T]                 | N-Term(iTRAQ4plex); K8(iTRAQ4  | 1 | 1 |
| [R].aEDLVGk.[S]                  | N-Term(iTRAQ4plex); K7(iTRAQ4  | 1 | 1 |
| [K].dFDfVPPVVR.[W]               | N-Term(iTRAQ4plex)             | 1 | 1 |
| [K].aAVYHHFISDGVR.[K]            | N-Term(iTRAQ4plex)             | 1 | 1 |
| [R].TELRPGETLNVNfLLR.[M]         |                                | 1 | 1 |
| [K].iWDVVEk.[A]                  | N-Term(iTRAQ4plex); K7(iTRAQ4  | 1 | 1 |
| [R].IESEETMVLEAHDAQGDVPVTVVHDFPG | N-Term(iTRAQ4plex); K30(iTRAQ  | 1 | 1 |
| [K].fVTVQATFGTQVVEk.[V]          | N-Term(iTRAQ4plex); K15(iTRAQ  | 1 | 1 |
| [K].fVTVQATFGTQVVEk.[V]          | N-Term(iTRAQ4plex); K15(iTRAQ  | 1 | 1 |
| [R].ISLPESLk.[R]                 | K8(iTRAQ4plex)                 | 1 | 1 |
| [K].vRVELLHNPAFcSLATtk.[R]       | N-Term(iTRAQ4plex); C12(Carbar | 1 | 1 |
| [K].ADIGcTPGSGk.[D]              | C5(Carbamidomethyl); K11(iTRA  | 1 | 1 |

|                                   |                                |   |   |
|-----------------------------------|--------------------------------|---|---|
| [K].vSHSEDDcLAFk.[V]              | N-Term(iTRAQ4plex); C8(Carbam  | 1 | 1 |
| [K].GQGTLSVVTMYHak.[A]            | K14(iTRAQ4plex)                | 1 | 1 |
| [R].tVmVNIENPEGIPVk.[Q]           | N-Term(iTRAQ4plex); M3(Oxidati | 1 | 1 |
| [K].aGDFLEANYMNLQR.[S]            | N-Term(iTRAQ4plex)             | 1 | 1 |
| [R].eGVQkEDIPPADLSDQVPDTESETR.[I] | N-Term(iTRAQ4plex); K5(iTRAQ4  | 1 | 1 |
| [R].cAEENcFIQk.[S]                | C1(Carbamidomethyl); C6(Carba  | 1 | 1 |
| [K].rIPIEDGSGEVVLSR.[K]           | N-Term(iTRAQ4plex)             | 1 | 1 |
| [K].fVTVQATFGTQVVEk.[V]           | N-Term(iTRAQ4plex); K15(iTRAQ  | 1 | 1 |
| [K].dFDfVPPVVR.[W]                | N-Term(iTRAQ4plex)             | 1 | 1 |
| [R].IVAYYTLIGASGQR.[E]            | N-Term(iTRAQ4plex)             | 1 | 1 |
| [K].NTMILEIcTR.[Y]                | C8(Carbamidomethyl)            | 1 | 1 |
| [R].aSHLGLAR.[S]                  | N-Term(iTRAQ4plex)             | 1 | 1 |
| [K].dQLTcNk.[F]                   | N-Term(iTRAQ4plex); C5(Carbam  | 1 | 1 |
| [R].eALKLEEK.[K]                  | N-Term(iTRAQ4plex); K4(iTRAQ4  | 1 | 1 |
| [R].fiSLGEAck.[K]                 | N-Term(iTRAQ4plex); C8(Carbam  | 1 | 1 |
| [K].eNEGFTVTAEGk.[G]              | N-Term(iTRAQ4plex); K12(iTRAQ  | 1 | 1 |
| [R].vELLHNPAFcSLATtk.[R]          | N-Term(iTRAQ4plex); C10(Carbar | 1 | 1 |
| [R].eVVADSVWVDVk.[D]              | N-Term(iTRAQ4plex); K12(iTRAQ  | 1 | 1 |
| [R].tkkQELSEAEQATR.[T]            | N-Term(iTRAQ4plex); K3(iTRAQ4  | 1 | 1 |
| [K].fYYIYNEk.[G]                  | N-Term(iTRAQ4plex); K8(iTRAQ4  | 1 | 1 |
| [R].tkkQELSEAEQATR.[T]            | N-Term(iTRAQ4plex); K2(iTRAQ4  | 1 | 1 |
| [K].kQELSEAEQATR.[T]              | N-Term(iTRAQ4plex); K1(iTRAQ4  | 1 | 1 |
| [K].iWDVVEk.[A]                   | N-Term(iTRAQ4plex); K7(iTRAQ4  | 1 | 1 |
| [K].fYYIYNEK.[G]                  | K8(iTRAQ4plex)                 | 1 | 1 |
| [K].EDIPPADLSDQVPDTESETR.[I]      |                                | 1 | 1 |
| [K].vLLDGvQNPR.[A]                | N-Term(iTRAQ4plex)             | 1 | 1 |
| [K].gVFVLNk.[K]                   | N-Term(iTRAQ4plex); K7(iTRAQ4  | 1 | 1 |
| [K].akDQLTcNk.[F]                 | N-Term(iTRAQ4plex); K2(iTRAQ4  | 1 | 1 |
| [R].aEDLVGk.[S]                   | N-Term(iTRAQ4plex); K7(iTRAQ4  | 1 | 1 |
| [K].SSLSVPYVIVPLk.[T]             | K13(iTRAQ4plex)                | 1 | 1 |
| [K].dYAGVFSdagLFTFTSSGQQAQR.[A]   | N-Term(iTRAQ4plex)             | 1 | 1 |
| [K].tGLQEVEVk.[A]                 | N-Term(iTRAQ4plex); K9(iTRAQ4  | 1 | 1 |
| [R].vVLVAVDk.[G]                  | N-Term(iTRAQ4plex); K8(iTRAQ4  | 1 | 1 |
| [R].vELLHNPAFcSLATtk.[R]          | N-Term(iTRAQ4plex); C10(Carbar | 1 | 1 |
| [K].dAPDHQELNLDVSLQLPSR.[S]       | N-Term(iTRAQ4plex)             | 1 | 1 |
| [K].kQELSEAEQATR.[T]              | N-Term(iTRAQ4plex); K1(iTRAQ4  | 1 | 1 |
| [K].IMNIFLk.[D]                   | N-Term(iTRAQ4plex); K7(iTRAQ4  | 1 | 1 |
| [R].aEDLVGk.[S]                   | N-Term(iTRAQ4plex); K7(iTRAQ4  | 1 | 1 |
| [K].TGLQEVEVk.[A]                 | K9(iTRAQ4plex)                 | 1 | 1 |
| [K].kQELSEAEQATR.[T]              | N-Term(iTRAQ4plex)             | 1 | 1 |
| [R].IkGPLLNk.[F]                  | N-Term(iTRAQ4plex); K2(iTRAQ4  | 1 | 1 |
| [K].kQELSEAEQATR.[T]              | K1(iTRAQ4plex)                 | 1 | 1 |
| [R].qPVPgQQmTLk.[I]               | N-Term(iTRAQ4plex); M8(Oxidati | 1 | 1 |
| [R].eGVQkEDIPPADLSDQVPDTESETR.[I] | N-Term(iTRAQ4plex); K5(iTRAQ4  | 1 | 1 |
| [R].sYTVAIAGYALaQMGR.[L]          | N-Term(iTRAQ4plex)             | 1 | 1 |
| [R].vVLVAVDk.[G]                  | K8(iTRAQ4plex)                 | 1 | 1 |
| [R].qPVPgQQmTLk.[I]               | N-Term(iTRAQ4plex); M8(Oxidati | 1 | 1 |
| [R].IESEETMVLEAHDAQGDVPVTVVHDFPG  | N-Term(iTRAQ4plex); K30(iTRAQ  | 1 | 1 |
| [K].VSHSEDDcLAFk.[V]              | C8(Carbamidomethyl); K12(iTRA  | 1 | 1 |
| [K].gYTQQLAFR.[Q]                 | N-Term(iTRAQ4plex)             | 1 | 1 |
| [R].iSLPESLk.[R]                  | N-Term(iTRAQ4plex); K8(iTRAQ4  | 1 | 1 |
| [R].sGIPIVtSPYQIHfTk.[T]          | N-Term(iTRAQ4plex); K16(iTRAQ  | 1 | 1 |

|                                   |                                |   |   |
|-----------------------------------|--------------------------------|---|---|
| [K].VHQYFNVELIQPGAVk.[V]          | K16(iTRAQ4plex)                | 1 | 1 |
| [K].vLLDGVQNPR.[A]                | N-Term(iTRAQ4plex)             | 1 | 1 |
| [K].LMNIFLk.[D]                   | K7(iTRAQ4plex)                 | 1 | 1 |
| [K].vFLDccNYITELR.[R]             | N-Term(iTRAQ4plex); C5(Carbam  | 1 | 1 |
| [K].vLLDGVQNPR.[A]                | N-Term(iTRAQ4plex)             | 1 | 1 |
| [R].sYTVAIAGYALAQMGR.[L]          | N-Term(iTRAQ4plex)             | 1 | 1 |
| [R].yTYLImNk.[G]                  | N-Term(iTRAQ4plex); M7(Oxidati | 1 | 1 |
| [K].ADIGcTPGSGk.[D]               | C5(Carbamidomethyl); K11(iTRA  | 1 | 1 |
| [R].eGVQkEDIPPADLSDQVPDTESETR.[I] | N-Term(iTRAQ4plex); K5(iTRAQ4  | 1 | 1 |
| [K].aAVYHHFISDGVR.[K]             | N-Term(iTRAQ4plex)             | 1 | 1 |
| [R].iHWESASLLR.[S]                | N-Term(iTRAQ4plex)             | 1 | 1 |
| [K].ImNIFLk.[D]                   | N-Term(iTRAQ4plex); M2(Oxidati | 1 | 1 |
| [K].sDDkVTLEER.[L]                | N-Term(iTRAQ4plex); K4(iTRAQ4  | 1 | 1 |
| [K].kVEGTAFVIFGIQDGEQR.[I]        | N-Term(iTRAQ4plex); K1(iTRAQ4  | 1 | 1 |
| [R].svQLTEk.[R]                   | N-Term(iTRAQ4plex); K7(iTRAQ4  | 1 | 1 |
| [K].kQELSEAEQATR.[T]              | K1(iTRAQ4plex)                 | 1 | 1 |
| [K].kQELSEAEQATR.[T]              | N-Term(iTRAQ4plex)             | 1 | 1 |
| [R].aYYENSPQQVFSTEFVek.[E]        | N-Term(iTRAQ4plex); K18(iTRAQ  | 1 | 1 |
| [R].eVVADSVWVDVek.[D]             | N-Term(iTRAQ4plex); K12(iTRAQ  | 1 | 1 |
| [R].iFTVNHk.[L]                   | N-Term(iTRAQ4plex); K7(iTRAQ4  | 1 | 1 |
| [K].fVTVQATFGTQVVEk.[V]           | N-Term(iTRAQ4plex); K15(iTRAQ  | 1 | 1 |
| [K].fYYIYNEk.[G]                  | N-Term(iTRAQ4plex); K8(iTRAQ4  | 1 | 1 |
| [K].AcEPGVdYVyk.[T]               | C2(Carbamidomethyl); K11(iTRA  | 1 | 1 |
| [R].RHQQTVTIPPk.[S]               | K11(iTRAQ4plex)                | 1 | 1 |
| [K].gQGTLSVVTmYHak.[A]            | N-Term(iTRAQ4plex); M10(Oxida  | 1 | 1 |
| [R].aEDLVGk.[S]                   | N-Term(iTRAQ4plex); K7(iTRAQ4  | 1 | 1 |
| [K].vEGTAFVIFGIQDGEQR.[I]         | N-Term(iTRAQ4plex)             | 1 | 1 |
| [R].yTYLImNk.[G]                  | N-Term(iTRAQ4plex); M7(Oxidati | 1 | 1 |
| [K].EDIPPADLSDQVPDTESETR.[I]      |                                | 1 | 1 |
| [R].FYHPEkEDGk.[L]                | K6(iTRAQ4plex); K10(iTRAQ4ple  | 1 | 1 |
| [K].VSHSEDDcLAFk.[V]              | C8(Carbamidomethyl); K12(iTRA  | 1 | 1 |
| [K].vLLDGVQNPR.[A]                | N-Term(iTRAQ4plex)             | 1 | 1 |
| [R].iLLQGTPVAQMTEDAVDAER.[L]      | N-Term(iTRAQ4plex)             | 1 | 1 |
| [K].aDIGcTPGSGk.[D]               | N-Term(iTRAQ4plex); C5(Carbam  | 1 | 1 |
| [K].kGYTQQLAFR.[Q]                | N-Term(iTRAQ4plex); K1(iTRAQ4  | 1 | 1 |
| [K].vEGTAFVIFGIQDGEQR.[I]         | N-Term(iTRAQ4plex)             | 1 | 1 |
| [K].vSHSEDDcLAFk.[V]              | N-Term(iTRAQ4plex); C8(Carbam  | 1 | 1 |
| [R].iFTVNHk.[L]                   | N-Term(iTRAQ4plex); K7(iTRAQ4  | 1 | 1 |
| [K].EDIPPADLSDQVPDTESETR.[I]      |                                | 1 | 1 |
| [K].vLLDGVQNPR.[A]                | N-Term(iTRAQ4plex)             | 1 | 1 |
| [R].aEDLVGk.[S]                   | N-Term(iTRAQ4plex); K7(iTRAQ4  | 1 | 1 |
| [R].qPVPGQQMTLk.[I]               | N-Term(iTRAQ4plex); K11(iTRAQ  | 1 | 1 |
| [R].IESEETMVLEAHDAQGDVPVTVVHDFPG  | N-Term(iTRAQ4plex); K30(iTRAQ  | 1 | 1 |
| [K].dFDfVPPVVR.[W]                | N-Term(iTRAQ4plex)             | 1 | 1 |
| [K].vSHSEDDcLAFk.[V]              | N-Term(iTRAQ4plex); C8(Carbam  | 1 | 1 |
| [K].fYYIYNEk.[G]                  | N-Term(iTRAQ4plex); K8(iTRAQ4  | 1 | 1 |
| [K].dQLTcNk.[F]                   | N-Term(iTRAQ4plex); C5(Carbam  | 1 | 1 |
| [K].sLYVSATVILHSGSDMVQAER.[S]     | N-Term(iTRAQ4plex)             | 1 | 1 |
| [R].aSHLGLAR.[S]                  | N-Term(iTRAQ4plex)             | 1 | 1 |
| [R].tVmVNIENPEGIPVk.[Q]           | N-Term(iTRAQ4plex); M3(Oxidati | 1 | 1 |
| [K].sDDkVTLEER.[L]                | N-Term(iTRAQ4plex); K4(iTRAQ4  | 1 | 1 |
| [K].TIYTPGSTVLYR.[I]              |                                | 1 | 1 |

|                                    |                                |   |   |
|------------------------------------|--------------------------------|---|---|
| [R].kSLkVVPEGIR.[M]                | N-Term(iTRAQ4plex); K4(iTRAQ4  | 1 | 1 |
| [R].kSLkVVPEGIR.[M]                | K1(iTRAQ4plex); K4(iTRAQ4plex) | 1 | 1 |
| [K].dYAGVFS DAGLTFTSSSGQQT AQR.[A] | N-Term(iTRAQ4plex)             | 1 | 1 |
| [K].kVEGTAFVIFGIQDGEQR.[I]         | N-Term(iTRAQ4plex); K1(iTRAQ4  | 1 | 1 |
| [K].ENEGFTVTAEGk.[G]               | K12(iTRAQ4plex)                | 1 | 1 |
| [K].kVEGTAFVIFGIQDGEQR.[I]         | N-Term(iTRAQ4plex); K1(iTRAQ4  | 1 | 1 |
| [R].tFISPIk.[C]                    | N-Term(iTRAQ4plex); K7(iTRAQ4  | 1 | 1 |
| [K].DicEEQVNSLPGSITk.[A]           | C3(Carbamidomethyl); K16(iTRA  | 1 | 1 |
| [R].TELRPGETLNVNFLLR.[M]           |                                | 1 | 1 |
| [K].iEGDHGAR.[V]                   | N-Term(iTRAQ4plex)             | 1 | 1 |
| [R].RHQQTVTIPPk.[S]                | K11(iTRAQ4plex)                | 1 | 1 |
| [K].EDIPPADLSDQVPDTESETR.[I]       |                                | 1 | 1 |
| [R].yTYLImNk.[G]                   | N-Term(iTRAQ4plex); M7(Oxidati | 1 | 1 |
| [R].sGIPIVTS PYQIHFTk.[T]          | N-Term(iTRAQ4plex); K16(iTRAQ  | 1 | 1 |
| [R].iLLQGTPVAQmTEDAVDAER.[L]       | N-Term(iTRAQ4plex); M11(Oxida  | 1 | 1 |
| [K].vHQYFNVELIQPGAVk.[V]           | N-Term(iTRAQ4plex); K16(iTRAQ  | 1 | 1 |
| [K].vYAYYNLEEScTR.[F]              | N-Term(iTRAQ4plex); C11(Carbar | 1 | 1 |
| [R].qGALELIk.[K]                   | N-Term(iTRAQ4plex); K8(iTRAQ4  | 1 | 1 |
| [K].fVTVQATFGTQVVEk.[V]            | N-Term(iTRAQ4plex); K15(iTRAQ  | 1 | 1 |
| [K].kQELSEAEQATR.[T]               | N-Term(iTRAQ4plex)             | 1 | 1 |
| [R].LkGPLLnk.[F]                   | K2(iTRAQ4plex); K8(iTRAQ4plex) | 1 | 1 |
| [R].lkGPLLnk.[F]                   | N-Term(iTRAQ4plex); K2(iTRAQ4  | 1 | 1 |
| [R].qPVPGQQMTLk.[I]                | N-Term(iTRAQ4plex); K11(iTRAQ  | 1 | 1 |
| [K].DFDFVPPVVR.[W]                 |                                | 1 | 1 |
| [R].sEPESWLWNVEDLkEPPk.[N]         | N-Term(iTRAQ4plex); K15(iTRAQ  | 1 | 1 |
| [K].vSHSEDDcLAFk.[V]               | N-Term(iTRAQ4plex); C8(Carbam  | 1 | 1 |
| [R].sVQLTEk.[R]                    | N-Term(iTRAQ4plex); K7(iTRAQ4  | 1 | 1 |
| [K].IVLSSEk.[TL]                   | N-Term(iTRAQ4plex); K7(iTRAQ4  | 1 | 2 |
| [K].VTIKPAPETEk.[R]                | K4(iTRAQ4plex); K11(iTRAQ4ple  | 1 | 1 |
| [R].aEDLVGk.[S]                    | N-Term(iTRAQ4plex); K7(iTRAQ4  | 1 | 1 |
| [R].hQQQVTIPPk.[S]                 | N-Term(iTRAQ4plex); K10(iTRAQ  | 1 | 1 |
| [R].sYTVAIAGYAL AQMGR.[L]          | N-Term(iTRAQ4plex)             | 1 | 1 |
| [K].dQLTcNk.[F]                    | N-Term(iTRAQ4plex); C5(Carbam  | 1 | 1 |
| [K].rPQDAkNTMILEIcTR.[Y]           | N-Term(iTRAQ4plex); K6(iTRAQ4  | 1 | 1 |
| [K].TIYTPGSTVLYR.[I]               |                                | 1 | 1 |
| [K].acEPGVDYVyk.[T]                | N-Term(iTRAQ4plex); C2(Carbam  | 1 | 1 |
| [K].ADIGcTPGSGk.[D]                | C5(Carbamidomethyl); K11(iTRA  | 1 | 1 |
| [R].YYTYLIMNk.[G]                  | K9(iTRAQ4plex)                 | 1 | 1 |
| [K].LLSGGNTLHLVSTTk.[T]            | K15(iTRAQ4plex)                | 1 | 1 |
| [R].eELcTMFIR.[E]                  | N-Term(iTRAQ4plex); C4(Carbam  | 1 | 1 |
| [R].NLQNNAEWVYQGAIR.[Q]            |                                | 1 | 1 |
| [K].vLVDHFGYTk.[D]                 | N-Term(iTRAQ4plex); K10(iTRAQ  | 1 | 1 |
| [K].LLSGGNTLHLVSTTk.[T]            | K15(iTRAQ4plex)                | 1 | 1 |
| [K].tEVIPPLIENR.[Q]                | N-Term(iTRAQ4plex)             | 1 | 1 |
| [K].tEVIPPLIENR.[Q]                | N-Term(iTRAQ4plex)             | 1 | 1 |
| [K].tEVIPPLIENR.[Q]                | N-Term(iTRAQ4plex)             | 1 | 1 |
| [K].tEVIPPLIENR.[Q]                | N-Term(iTRAQ4plex)             | 1 | 1 |
| [K].tEVIPPLIENR.[Q]                | N-Term(iTRAQ4plex)             | 1 | 1 |
| [K].dNVFDGLVR.[V]                  | N-Term(iTRAQ4plex)             | 1 | 1 |
| [K].fPEVDVLTK.[Y]                  | N-Term(iTRAQ4plex); K9(iTRAQ4  | 1 | 1 |
| [K].ESQLPTVMDFR.[K]                |                                | 1 | 1 |
| [K].eSQLPTVMDFR.[K]                | N-Term(iTRAQ4plex)             | 1 | 1 |

|                                |                                         |   |   |
|--------------------------------|-----------------------------------------|---|---|
| [K].eSQLPTVMDFR.[K]            | N-Term(iTRAQ4plex)                      | 1 | 1 |
| [K].eSQLPTVMDFR.[K]            | N-Term(iTRAQ4plex)                      | 1 | 1 |
| [R].tEHGSEMLFFGNAIEGk.[S]      | N-Term(iTRAQ4plex); K17(iTRAQ4plex)     | 1 | 1 |
| [R].tEHGSEMLFFGNAIEGk.[S]      | N-Term(iTRAQ4plex); K17(iTRAQ4plex)     | 1 | 1 |
| [K].IDFSSQADLR.[N]             | N-Term(iTRAQ4plex)                      | 1 | 1 |
| [K].eSQLPTVMDFR.[K]            | N-Term(iTRAQ4plex); M8(Oxidation)       | 1 | 1 |
| [R].aTLYALSHAVNNYHk.[T]        | N-Term(iTRAQ4plex); K15(iTRAQ4plex)     | 1 | 1 |
| [K].qVFLYPEk.[D]               | N-Term(iTRAQ4plex); K8(iTRAQ4plex)      | 1 | 1 |
| [R].nNALDFVtk.[S]              | N-Term(iTRAQ4plex); K9(iTRAQ4plex)      | 1 | 1 |
| [R].nNALDFVtk.[S]              | N-Term(iTRAQ4plex); K9(iTRAQ4plex)      | 1 | 1 |
| [R].aTLYALSHAVNNYHk.[T]        | N-Term(iTRAQ4plex); K15(iTRAQ4plex)     | 1 | 1 |
| [R].aTLYALSHAVNNYHk.[T]        | N-Term(iTRAQ4plex); K15(iTRAQ4plex)     | 1 | 1 |
| [K].hINIDQFVR.[K]              | N-Term(iTRAQ4plex)                      | 1 | 1 |
| [K].dFSLWEk.[T]                | N-Term(iTRAQ4plex); K7(iTRAQ4plex)      | 1 | 1 |
| [K].IAELSATAQEIIk.[S]          | K13(iTRAQ4plex)                         | 1 | 1 |
| [K].nTLELSNGVIVk.[I]           | N-Term(iTRAQ4plex); K12(iTRAQ4plex)     | 1 | 1 |
| [K].sPAFTDLHLR.[Y]             | N-Term(iTRAQ4plex)                      | 1 | 1 |
| [K].aTGVLYDYVnk.[Y]            | N-Term(iTRAQ4plex); K11(iTRAQ4plex)     | 1 | 1 |
| [K].aTGVLYDYVnk.[Y]            | N-Term(iTRAQ4plex); K11(iTRAQ4plex)     | 1 | 1 |
| [R].vSTAFVYtk.[N]              | N-Term(iTRAQ4plex); K9(iTRAQ4plex)      | 1 | 1 |
| [K].nSEEFAAAMSR.[Y]            | N-Term(iTRAQ4plex)                      | 1 | 1 |
| [K].kIISDYHQQR.[Y]             | N-Term(iTRAQ4plex); K1(iTRAQ4plex)      | 1 | 1 |
| [K].nSEEFAAAMSR.[Y]            | N-Term(iTRAQ4plex)                      | 1 | 1 |
| [R].kYTYNYEAESSGVPGTADSR.[S]   | N-Term(iTRAQ4plex); K1(iTRAQ4plex)      | 1 | 1 |
| [K].iISDYHQQR.[Y]              | N-Term(iTRAQ4plex)                      | 1 | 1 |
| [K].IHVAGNLk.[G]               | N-Term(iTRAQ4plex); K8(iTRAQ4plex)      | 1 | 1 |
| [R].sEYQADYESLR.[F]            | N-Term(iTRAQ4plex)                      | 1 | 1 |
| [R].IYSLWEHSTk.[N]             | K10(iTRAQ4plex)                         | 1 | 1 |
| [K].cVQSTkPSLMIQk.[A]          | N-Term(iTRAQ4plex); C1(Carbamidomethyl) | 1 | 1 |
| [K].cVQSTkPSLMIQk.[A]          | N-Term(iTRAQ4plex); C1(Carbamidomethyl) | 1 | 1 |
| [K].iISDYHQQR.[Y]              | N-Term(iTRAQ4plex)                      | 1 | 1 |
| [K].iISDYHQQR.[Y]              | N-Term(iTRAQ4plex)                      | 1 | 1 |
| [K].iISDYHQQR.[Y]              | N-Term(iTRAQ4plex)                      | 1 | 1 |
| [K].IVELAHQYk.[L]              | N-Term(iTRAQ4plex); K9(iTRAQ4plex)      | 1 | 1 |
| [K].LATALSLSNk.[F]             | K10(iTRAQ4plex)                         | 1 | 1 |
| [K].iISDYHQQR.[Y]              | N-Term(iTRAQ4plex)                      | 1 | 1 |
| [R].kYTYNYEAESSGVPGTADSR.[S]   | K1(iTRAQ4plex)                          | 1 | 1 |
| [R].kYTYNYEAESSGVPGTADSR.[S]   | N-Term(iTRAQ4plex)                      | 1 | 1 |
| [K].yHWEHTGLTLR.[E]            | N-Term(iTRAQ4plex)                      | 1 | 1 |
| [K].svGFHLPSR.[E]              | N-Term(iTRAQ4plex)                      | 1 | 1 |
| [K].svGFHLPSR.[E]              | N-Term(iTRAQ4plex)                      | 1 | 1 |
| [R].yEVDQQIQVLMdk.[L]          | N-Term(iTRAQ4plex); K13(iTRAQ4plex)     | 1 | 1 |
| [R].yEVDQQIQVLMdk.[L]          | N-Term(iTRAQ4plex); K13(iTRAQ4plex)     | 1 | 1 |
| [R].yEDGTLSTSTSDLQSGIIk.[N]    | N-Term(iTRAQ4plex); K20(iTRAQ4plex)     | 1 | 1 |
| [K].IDDIWNLEVk.[E]             | K10(iTRAQ4plex)                         | 1 | 1 |
| [K].yHWEHTGLTLR.[E]            | N-Term(iTRAQ4plex)                      | 1 | 1 |
| [K].yHWEHTGLTLR.[E]            | N-Term(iTRAQ4plex)                      | 1 | 1 |
| [K].dkDQEVLLQTFLLDDASPGDKR.[L] | N-Term(iTRAQ4plex); K2(iTRAQ4plex)      | 1 | 1 |
| [K].dkDQEVLLQTFLLDDASPGDKR.[L] | N-Term(iTRAQ4plex); K2(iTRAQ4plex)      | 1 | 1 |
| [K].dkDQEVLLQTFLLDDASPGDKR.[L] | N-Term(iTRAQ4plex); K2(iTRAQ4plex)      | 1 | 1 |
| [K].dkDQEVLLQTFLLDDASPGDKR.[L] | N-Term(iTRAQ4plex); K2(iTRAQ4plex)      | 1 | 1 |
| [K].IQDFSDQLSDYYEK.[F]         | N-Term(iTRAQ4plex); K14(iTRAQ4plex)     | 1 | 1 |

|                               |                                |   |   |
|-------------------------------|--------------------------------|---|---|
| [R].iTENDIQIALDDAK.[I]        | N-Term(iTRAQ4plex); K14(iTRAQ4 | 1 | 1 |
| [K].IQDFSDQLSDYYEK.[F]        | N-Term(iTRAQ4plex); K14(iTRAQ4 | 1 | 1 |
| [K].IQDFSDQLSDYYEK.[F]        | N-Term(iTRAQ4plex); K14(iTRAQ4 | 1 | 1 |
| [R].iTENDIQIALDDAK.[I]        | N-Term(iTRAQ4plex); K14(iTRAQ4 | 1 | 1 |
| [R].iTENDIQIALDDAK.[I]        | N-Term(iTRAQ4plex); K14(iTRAQ4 | 1 | 1 |
| [R].iTENDIQIALDDAK.[I]        | N-Term(iTRAQ4plex); K14(iTRAQ4 | 1 | 1 |
| [K].dkDQEVLLQTFLLDDASPGDK.[R] | N-Term(iTRAQ4plex); K2(iTRAQ4  | 1 | 1 |
| [K].dkDQEVLLQTFLLDDASPGDK.[R] | N-Term(iTRAQ4plex); K2(iTRAQ4  | 1 | 1 |
| [K].dkDQEVLLQTFLLDDASPGDK.[R] | N-Term(iTRAQ4plex); K2(iTRAQ4  | 1 | 1 |
| [K].dkDQEVLLQTFLLDDASPGDK.[R] | N-Term(iTRAQ4plex); K2(iTRAQ4  | 1 | 1 |
| [K].dkDQEVLLQTFLLDDASPGDK.[R] | N-Term(iTRAQ4plex); K2(iTRAQ4  | 1 | 1 |
| [K].dkDQEVLLQTFLLDDASPGDK.[R] | N-Term(iTRAQ4plex); K2(iTRAQ4  | 1 | 1 |
| [K].dkDQEVLLQTFLLDDASPGDK.[R] | N-Term(iTRAQ4plex); K2(iTRAQ4  | 1 | 1 |
| [K].dkDQEVLLQTFLLDDASPGDK.[R] | N-Term(iTRAQ4plex); K2(iTRAQ4  | 1 | 1 |
| [K].dkDQEVLLQTFLLDDASPGDK.[R] | N-Term(iTRAQ4plex); K2(iTRAQ4  | 1 | 1 |
| [K].dkDQEVLLQTFLLDDASPGDK.[R] | N-Term(iTRAQ4plex); K2(iTRAQ4  | 1 | 1 |
| [K].dEPTYILNIK.[R]            | N-Term(iTRAQ4plex); K10(iTRAQ4 | 1 | 1 |
| [R].eYSGTIASEANTYLNSK.[S]     | N-Term(iTRAQ4plex); K17(iTRAQ4 | 1 | 1 |
| [K].FPEVDVLTk.[Y]             | K9(iTRAQ4plex)                 | 1 | 1 |
| [K].mTSNFPVLDSDYPk.[S]        | N-Term(iTRAQ4plex); M1(Oxidati | 1 | 1 |
| [K].IALWGEHTGQLYSK.[F]        | N-Term(iTRAQ4plex); K14(iTRAQ4 | 1 | 1 |
| [K].ITISEQNIQR.[A]            | N-Term(iTRAQ4plex)             | 1 | 1 |
| [K].ITISEQNIQR.[A]            | N-Term(iTRAQ4plex)             | 1 | 1 |
| [K].IATALSLSNK.[F]            | N-Term(iTRAQ4plex); K10(iTRAQ4 | 1 | 1 |
| [K].IATALSLSNK.[F]            | N-Term(iTRAQ4plex); K10(iTRAQ4 | 1 | 1 |
| [K].IATALSLSNK.[F]            | N-Term(iTRAQ4plex); K10(iTRAQ4 | 1 | 1 |
| [K].iNNQLTLDSNTk.[Y]          | N-Term(iTRAQ4plex); K12(iTRAQ4 | 1 | 1 |
| [K].IATALSLSNK.[F]            | N-Term(iTRAQ4plex); K10(iTRAQ4 | 1 | 1 |
| [K].skPTVSSSMEFk.[Y]          | N-Term(iTRAQ4plex); K2(iTRAQ4  | 1 | 1 |
| [K].skPTVSSSMEFk.[Y]          | N-Term(iTRAQ4plex); K2(iTRAQ4  | 1 | 1 |
| [K].hiYAISSAALSASYk.[A]       | N-Term(iTRAQ4plex); K15(iTRAQ4 | 1 | 1 |
| [K].mGLAFESTk.[S]             | N-Term(iTRAQ4plex); K9(iTRAQ4  | 1 | 1 |
| [K].mGLAFESTk.[S]             | N-Term(iTRAQ4plex); K9(iTRAQ4  | 1 | 1 |
| [R].iGQDGIStSATTNLk.[C]       | N-Term(iTRAQ4plex); K15(iTRAQ4 | 1 | 1 |
| [K].aHLDIAGSLEGLHR.[F]        | N-Term(iTRAQ4plex)             | 1 | 1 |
| [K].qGFFPDSVnk.[A]            | N-Term(iTRAQ4plex); K10(iTRAQ4 | 1 | 1 |
| [K].aHLDIAGSLEGLHR.[F]        | N-Term(iTRAQ4plex)             | 1 | 1 |
| [K].SPAFTDLHLR.[Y]            |                                | 1 | 1 |
| [K].SPAFTDLHLR.[Y]            |                                | 1 | 1 |
| [R].khVAEAIck.[E]             | N-Term(iTRAQ4plex); K1(iTRAQ4  | 1 | 1 |
| [K].dQEVLLQTFLLDDASPGDK.[R]   | N-Term(iTRAQ4plex); K18(iTRAQ4 | 1 | 1 |
| [K].ILSGGNTLHLVSTTk.[T]       | N-Term(iTRAQ4plex); K15(iTRAQ4 | 1 | 1 |
| [K].IISDYHQFR.[Y]             |                                | 1 | 1 |
| [K].ILSGGNTLHLVSTTk.[T]       | N-Term(iTRAQ4plex); K15(iTRAQ4 | 1 | 1 |
| [K].nkYGMVAQVTQTLk.[L]        | N-Term(iTRAQ4plex); K2(iTRAQ4  | 1 | 1 |
| [K].fVTQAEGAk.[Q]             | N-Term(iTRAQ4plex); K9(iTRAQ4  | 1 | 1 |
| [R].fQFPgkPGIYTR.[E]          | N-Term(iTRAQ4plex); K6(iTRAQ4  | 1 | 1 |
| [K].ILSGGNTLHLVSTTk.[T]       | N-Term(iTRAQ4plex); K15(iTRAQ4 | 1 | 1 |
| [K].kLTISEQNIQR.[A]           | N-Term(iTRAQ4plex); K1(iTRAQ4  | 1 | 1 |
| [K].kLTISEQNIQR.[A]           | N-Term(iTRAQ4plex); K1(iTRAQ4  | 1 | 1 |
| [K].kLTISEQNIQR.[A]           | N-Term(iTRAQ4plex); K1(iTRAQ4  | 1 | 1 |
| [K].ILSGGNTLHLVSTTk.[T]       | N-Term(iTRAQ4plex); K15(iTRAQ4 | 1 | 1 |



|                               |                                |   |   |
|-------------------------------|--------------------------------|---|---|
| [R].kSISAALEhk.[V]            | N-Term(iTRAQ4plex); K1(iTRAQ4  | 1 | 1 |
| [R].fQFPgkPGIYTR.[E]          | N-Term(iTRAQ4plex); K6(iTRAQ4  | 1 | 1 |
| [R].fQFPgkPGIYTR.[E]          | N-Term(iTRAQ4plex); K6(iTRAQ4  | 1 | 1 |
| [K].ILSGGNTLHLVSTTk.[T]       | N-Term(iTRAQ4plex); K15(iTRAQ  | 1 | 1 |
| [R].TSSFALNLPTEVvk.[F]        | K15(iTRAQ4plex)                | 1 | 1 |
| [K].hINIDQFVR.[K]             | N-Term(iTRAQ4plex)             | 1 | 1 |
| [K].hINIDQFVR.[K]             | N-Term(iTRAQ4plex)             | 1 | 1 |
| [K].hINIDQFVR.[K]             | N-Term(iTRAQ4plex)             | 1 | 1 |
| [K].yHWEHTGLTLR.[E]           | N-Term(iTRAQ4plex)             | 1 | 1 |
| [K].yHWEHTGLTLR.[E]           | N-Term(iTRAQ4plex)             | 1 | 1 |
| [K].yHWEHTGLTLR.[E]           | N-Term(iTRAQ4plex)             | 1 | 1 |
| [R].tLADLTLDSPIk.[V]          | N-Term(iTRAQ4plex); K13(iTRAQ  | 1 | 1 |
| [K].yHWEHTGLTLR.[E]           | N-Term(iTRAQ4plex)             | 1 | 1 |
| [K].LLSGGNTLHLVSTTk.[T]       | K15(iTRAQ4plex)                | 1 | 1 |
| [R].seILAHWSPak.[L]           | N-Term(iTRAQ4plex); K11(iTRAQ  | 1 | 1 |
| [K].vLVDHFGYtk.[D]            | N-Term(iTRAQ4plex); K10(iTRAQ  | 1 | 1 |
| [K].yHWEHTGLTLR.[E]           | N-Term(iTRAQ4plex)             | 1 | 1 |
| [K].yHWEHTGLTLR.[E]           | N-Term(iTRAQ4plex)             | 1 | 1 |
| [K].yHWEHTGLTLR.[E]           | N-Term(iTRAQ4plex)             | 1 | 1 |
| [K].ILLQmDSSATAYGSTVskR.[V]   | N-Term(iTRAQ4plex); M5(Oxidati | 1 | 1 |
| [K].wNFYYSQSSPDkk.[L]         | N-Term(iTRAQ4plex); K13(iTRAQ  | 1 | 1 |
| [K].aHLDIAGSLEGHLR.[F]        | N-Term(iTRAQ4plex)             | 1 | 1 |
| [K].wNFYYSQSSPDkk.[L]         | N-Term(iTRAQ4plex); K13(iTRAQ  | 1 | 1 |
| [K].aHLDIAGSLEGHLR.[F]        | N-Term(iTRAQ4plex)             | 1 | 1 |
| [K].aHLDIAGSLEGHLR.[F]        | N-Term(iTRAQ4plex)             | 1 | 1 |
| [K].aHLDIAGSLEGHLR.[F]        | N-Term(iTRAQ4plex)             | 1 | 1 |
| [K].aHLDIAGSLEGHLR.[F]        | N-Term(iTRAQ4plex)             | 1 | 1 |
| [K].IPQQANDYLNFSNWER.[Q]      | N-Term(iTRAQ4plex)             | 1 | 1 |
| [R].gIISALLVPPETEEAk.[Q]      | N-Term(iTRAQ4plex); K16(iTRAQ  | 1 | 1 |
| [R].gIISALLVPPETEEAk.[Q]      | N-Term(iTRAQ4plex); K16(iTRAQ  | 1 | 1 |
| [R].gIISALLVPPETEEAk.[Q]      | N-Term(iTRAQ4plex); K16(iTRAQ  | 1 | 1 |
| [K].wNFYYSQSSPDkk.[L]         | N-Term(iTRAQ4plex); K13(iTRAQ  | 1 | 1 |
| [K].aHLDIAGSLEGHLR.[F]        | N-Term(iTRAQ4plex)             | 1 | 1 |
| [K].wNFYYSQSSPDkk.[L]         | N-Term(iTRAQ4plex); K13(iTRAQ  | 1 | 1 |
| [R].iYSLWEHSTk.[N]            | N-Term(iTRAQ4plex); K10(iTRAQ  | 1 | 1 |
| [K].yGmVAQVTQTLk.[L]          | N-Term(iTRAQ4plex); M3(Oxidati | 1 | 1 |
| [K].yGmVAQVTQTLk.[L]          | N-Term(iTRAQ4plex); M3(Oxidati | 1 | 1 |
| [R].iYSLWEHSTk.[N]            | N-Term(iTRAQ4plex); K10(iTRAQ  | 1 | 1 |
| [R].iYSLWEHSTk.[N]            | N-Term(iTRAQ4plex); K10(iTRAQ  | 1 | 1 |
| [R].iYSLWEHSTk.[N]            | N-Term(iTRAQ4plex); K10(iTRAQ  | 1 | 1 |
| [K].IATALSLSNK.[F]            | N-Term(iTRAQ4plex); K10(iTRAQ  | 1 | 1 |
| [K].kLQSTTVMNPYmk.[L]         | N-Term(iTRAQ4plex); K1(iTRAQ4  | 1 | 1 |
| [K].GFEPTLEALFGk.[Q]          | K12(iTRAQ4plex)                | 1 | 1 |
| [K].aQNLYQELLTQEGQASFOGLk.[D] | N-Term(iTRAQ4plex); K21(iTRAQ  | 1 | 1 |
| [K].kiISDYHQQFR.[Y]           | N-Term(iTRAQ4plex); K1(iTRAQ4  | 1 | 1 |
| [K].rHIQNIDIQHLAGk.[L]        | N-Term(iTRAQ4plex); K14(iTRAQ  | 1 | 1 |
| [K].iISDYHQQFR.[Y]            | N-Term(iTRAQ4plex)             | 1 | 1 |
| [K].iISDYHQQFR.[Y]            | N-Term(iTRAQ4plex)             | 1 | 1 |
| [K].svGFHLPSR.[E]             | N-Term(iTRAQ4plex)             | 1 | 1 |
| [K].svGFHLPSR.[E]             | N-Term(iTRAQ4plex)             | 1 | 1 |
| [K].vSALLTPAEQTGTWk.[L]       | N-Term(iTRAQ4plex); K15(iTRAQ  | 1 | 1 |
| [K].vSALLTPAEQTGTWk.[L]       | N-Term(iTRAQ4plex); K15(iTRAQ  | 1 | 1 |

|                              |                                     |   |   |
|------------------------------|-------------------------------------|---|---|
| [K].eQHFLPFSYk.[N]           | N-Term(iTRAQ4plex); K11(iTRAQ4plex) | 1 | 1 |
| [K].iVQILPWEQNEQVk.[N]       | N-Term(iTRAQ4plex); K14(iTRAQ4plex) | 1 | 1 |
| [R].qTIIVLENVQR.[N]          | N-Term(iTRAQ4plex)                  | 1 | 1 |
| [R].qTIIVLENVQR.[N]          | N-Term(iTRAQ4plex)                  | 1 | 1 |
| [R].qTIIVLENVQR.[N]          | N-Term(iTRAQ4plex)                  | 1 | 1 |
| [K].iVQILPWEQNEQVk.[N]       | N-Term(iTRAQ4plex); K14(iTRAQ4plex) | 1 | 1 |
| [K].iVQILPWEQNEQVk.[N]       | N-Term(iTRAQ4plex); K14(iTRAQ4plex) | 1 | 1 |
| [K].ILLQMDSSATAYGSTVSk.[R]   | N-Term(iTRAQ4plex); K18(iTRAQ4plex) | 1 | 1 |
| [K].ILLQMDSSATAYGSTVSk.[R]   | N-Term(iTRAQ4plex); K18(iTRAQ4plex) | 1 | 1 |
| [R].IPSVQINFk.[D]            | K9(iTRAQ4plex)                      | 1 | 1 |
| [K].iTEVALMGHLScdTk.[E]      | N-Term(iTRAQ4plex); C12(Carbamoyl)  | 1 | 1 |
| [R].evGTVLSQVYSk.[V]         | N-Term(iTRAQ4plex); K12(iTRAQ4plex) | 1 | 1 |
| [K].yGMVAQVTQTLk.[L]         | N-Term(iTRAQ4plex); K12(iTRAQ4plex) | 1 | 1 |
| [K].yGMVAQVTQTLk.[L]         | N-Term(iTRAQ4plex); K12(iTRAQ4plex) | 1 | 1 |
| [K].yGMVAQVTQTLk.[L]         | N-Term(iTRAQ4plex); K12(iTRAQ4plex) | 1 | 1 |
| [K].yGMVAQVTQTLk.[L]         | N-Term(iTRAQ4plex); K12(iTRAQ4plex) | 1 | 1 |
| [K].svSLPSLDPASak.[I]        | N-Term(iTRAQ4plex); K13(iTRAQ4plex) | 1 | 1 |
| [K].svSLPSLDPASak.[I]        | N-Term(iTRAQ4plex); K13(iTRAQ4plex) | 1 | 1 |
| [R].evGTVLSQVYSk.[V]         | N-Term(iTRAQ4plex); K12(iTRAQ4plex) | 1 | 1 |
| [K].svSLPSLDPASak.[I]        | N-Term(iTRAQ4plex); K13(iTRAQ4plex) | 1 | 1 |
| [K].svSLPSLDPASak.[I]        | N-Term(iTRAQ4plex); K13(iTRAQ4plex) | 1 | 1 |
| [R].evGTVLSQVYSk.[V]         | N-Term(iTRAQ4plex); K12(iTRAQ4plex) | 1 | 1 |
| [K].aTGVLVDYVnk.[Y]          | N-Term(iTRAQ4plex); K11(iTRAQ4plex) | 1 | 1 |
| [K].niILPVYDk.[S]            | N-Term(iTRAQ4plex); K9(iTRAQ4plex)  | 1 | 1 |
| [R].vIGNmGQTMEQLTPELk.[S]    | N-Term(iTRAQ4plex); M5(Oxidation)   | 1 | 1 |
| [K].niILPVYDk.[S]            | N-Term(iTRAQ4plex); K9(iTRAQ4plex)  | 1 | 1 |
| [R].tIDQmLNSELQWPVPDIYLR.[D] | N-Term(iTRAQ4plex); M5(Oxidation)   | 1 | 1 |
| [R].nLQNNAEWVYQGAIR.[Q]      | N-Term(iTRAQ4plex)                  | 1 | 1 |
| [R].nLQNNAEWVYQGAIR.[Q]      | N-Term(iTRAQ4plex)                  | 1 | 1 |
| [K].wNFYSPQSSPDK.[K]         | N-Term(iTRAQ4plex); K13(iTRAQ4plex) | 1 | 1 |
| [K].wNFYSPQSSPDK.[K]         | N-Term(iTRAQ4plex); K13(iTRAQ4plex) | 1 | 1 |
| [R].nLQNNAEWVYQGAIR.[Q]      | N-Term(iTRAQ4plex)                  | 1 | 1 |
| [K].wNFYSPQSSPDK.[K]         | N-Term(iTRAQ4plex); K13(iTRAQ4plex) | 1 | 1 |
| [R].seILAHWSPak.[L]          | N-Term(iTRAQ4plex); K11(iTRAQ4plex) | 1 | 1 |
| [K].vLVDHFGYTk.[D]           | N-Term(iTRAQ4plex); K10(iTRAQ4plex) | 1 | 1 |
| [K].sPAFTDLHLR.[Y]           | N-Term(iTRAQ4plex)                  | 1 | 1 |
| [K].sPAFTDLHLR.[Y]           | N-Term(iTRAQ4plex)                  | 1 | 1 |
| [K].sPAFTDLHLR.[Y]           | N-Term(iTRAQ4plex)                  | 1 | 1 |
| [K].sPAFTDLHLR.[Y]           | N-Term(iTRAQ4plex)                  | 1 | 1 |
| [R].vSTAFVYTk.[N]            | N-Term(iTRAQ4plex); K9(iTRAQ4plex)  | 1 | 1 |
| [K].mGLAFESTk.[S]            | N-Term(iTRAQ4plex); K9(iTRAQ4plex)  | 1 | 1 |
| [K].IDVTTSIGR.[R]            | N-Term(iTRAQ4plex)                  | 1 | 1 |
| [R].hiQNIDIQHLAGk.[L]        | N-Term(iTRAQ4plex); K13(iTRAQ4plex) | 1 | 1 |
| [R].hiQNIDIQHLAGk.[L]        | N-Term(iTRAQ4plex); K13(iTRAQ4plex) | 1 | 1 |
| [K].IDVTTSIGR.[R]            | N-Term(iTRAQ4plex)                  | 1 | 1 |
| [R].hiQNIDIQHLAGk.[L]        | N-Term(iTRAQ4plex); K13(iTRAQ4plex) | 1 | 1 |
| [K].IISDYHQQFR.[Y]           |                                     | 1 | 1 |
| [R].hiQNIDIQHLAGk.[L]        | N-Term(iTRAQ4plex); K13(iTRAQ4plex) | 1 | 1 |
| [R].seILAHWSPak.[L]          | N-Term(iTRAQ4plex); K11(iTRAQ4plex) | 1 | 1 |
| [K].vLVDHFGYTk.[D]           | N-Term(iTRAQ4plex); K10(iTRAQ4plex) | 1 | 1 |
| [K].aHLDIAGSLEGHRL.[F]       | N-Term(iTRAQ4plex)                  | 1 | 1 |
| [K].aHLDIAGSLEGHRL.[F]       | N-Term(iTRAQ4plex)                  | 1 | 1 |

|                                 |                                     |   |   |
|---------------------------------|-------------------------------------|---|---|
| [K].IQSTTVMNPYmk.[L]            | N-Term(iTRAQ4plex); K12(iTRAQ4plex) | 1 | 1 |
| [R].SPSQADINk.[I]               | K9(iTRAQ4plex)                      | 1 | 1 |
| [K].yGmVAQVTQTLk.[L]            | N-Term(iTRAQ4plex); M3(Oxidation)   | 1 | 1 |
| [R].ITLDIQnk.[K]                | N-Term(iTRAQ4plex); K8(iTRAQ4plex)  | 1 | 1 |
| [K].sPAFTDLHLR.[Y]              | N-Term(iTRAQ4plex)                  | 1 | 1 |
| [K].yGmVAQVTQTLk.[L]            | N-Term(iTRAQ4plex); M3(Oxidation)   | 1 | 1 |
| [K].aHLDIAGSLEGHRL.[F]          | N-Term(iTRAQ4plex)                  | 1 | 1 |
| [K].iEGNLIFDPNNYLpk.[E]         | N-Term(iTRAQ4plex); K15(iTRAQ4plex) | 1 | 1 |
| [K].iEGNLIFDPNNYLpk.[E]         | N-Term(iTRAQ4plex); K15(iTRAQ4plex) | 1 | 1 |
| [R].gIISALLVPPETEEAk.[Q]        | N-Term(iTRAQ4plex); K16(iTRAQ4plex) | 1 | 1 |
| [R].gIISALLVPPETEEAk.[Q]        | N-Term(iTRAQ4plex); K16(iTRAQ4plex) | 1 | 1 |
| [K].nLTDFAEQYSIQDWak.[R]        | N-Term(iTRAQ4plex); K16(iTRAQ4plex) | 1 | 1 |
| [R].IELELRPTGIEQYSVSATYELQR.[E] | N-Term(iTRAQ4plex)                  | 1 | 1 |
| [K].aQNLQYQELLTQEGQASFOGLk.[D]  | N-Term(iTRAQ4plex); K21(iTRAQ4plex) | 1 | 1 |
| [K].iDDIWNLEVk.[E]              | N-Term(iTRAQ4plex); K10(iTRAQ4plex) | 1 | 1 |
| [K].iDDIWNLEVk.[E]              | N-Term(iTRAQ4plex); K10(iTRAQ4plex) | 1 | 1 |
| [K].iDDIWNLEVk.[E]              | N-Term(iTRAQ4plex); K10(iTRAQ4plex) | 1 | 1 |
| [K].qVFLYPEKDEPTYILNIk.[R]      | N-Term(iTRAQ4plex); K8(iTRAQ4plex)  | 1 | 1 |
| [R].vIGNMGQTMEQLTPELk.[S]       | N-Term(iTRAQ4plex); K17(iTRAQ4plex) | 1 | 1 |
| [K].qVFLYPEKDEPTYILNIk.[R]      | N-Term(iTRAQ4plex); K8(iTRAQ4plex)  | 1 | 1 |
| [K].qVFLYPEKDEPTYILNIk.[R]      | N-Term(iTRAQ4plex); K8(iTRAQ4plex)  | 1 | 1 |
| [K].qVFLYPEKDEPTYILNIk.[R]      | N-Term(iTRAQ4plex); K8(iTRAQ4plex)  | 1 | 1 |
| [K].iDDIWNLEVk.[E]              | N-Term(iTRAQ4plex); K10(iTRAQ4plex) | 1 | 1 |
| [K].iDDIWNLEVk.[E]              | N-Term(iTRAQ4plex); K10(iTRAQ4plex) | 1 | 1 |
| [R].IELELRPTGIEQYSVSATYELQR.[E] | N-Term(iTRAQ4plex)                  | 1 | 1 |
| [K].iDDIWNLEVKENFAGEATLQR.[I]   | N-Term(iTRAQ4plex); K10(iTRAQ4plex) | 1 | 1 |
| [K].aQNLQYQELLTQEGQASFOGLk.[D]  | N-Term(iTRAQ4plex); K21(iTRAQ4plex) | 1 | 1 |
| [K].VNWEEEEASGLLTSLk.[D]        | K16(iTRAQ4plex)                     | 1 | 1 |
| [K].VNWEEEEASGLLTSLk.[D]        | K16(iTRAQ4plex)                     | 1 | 1 |
| [K].vNWEEEEASGLLTSLk.[D]        | N-Term(iTRAQ4plex); K16(iTRAQ4plex) | 1 | 1 |
| [R].eEYFDPSIVGWTvk.[Y]          | N-Term(iTRAQ4plex); K14(iTRAQ4plex) | 1 | 1 |
| [K].aQNLQYQELLTQEGQASFOGLk.[D]  | N-Term(iTRAQ4plex); K21(iTRAQ4plex) | 1 | 1 |
| [R].IELELRPTGIEQYSVSATYELQR.[E] | N-Term(iTRAQ4plex)                  | 1 | 1 |
| [K].nLTDFAEQYSIQDWak.[R]        | N-Term(iTRAQ4plex); K16(iTRAQ4plex) | 1 | 1 |
| [R].IELELRPTGIEQYSVSATYELQR.[E] | N-Term(iTRAQ4plex)                  | 1 | 1 |
| [K].iEGNLIFDPNNYLpk.[E]         | N-Term(iTRAQ4plex); K15(iTRAQ4plex) | 1 | 1 |
| [K].nLTDFAEQYSIQDWak.[R]        | N-Term(iTRAQ4plex); K16(iTRAQ4plex) | 1 | 1 |
| [K].aQNLQYQELLTQEGQASFOGLk.[D]  | N-Term(iTRAQ4plex); K21(iTRAQ4plex) | 1 | 1 |
| [R].iLGEELGFASLHDLQLLgk.[L]     | N-Term(iTRAQ4plex); K19(iTRAQ4plex) | 1 | 1 |
| [K].gFEPTLEALFGk.[Q]            | N-Term(iTRAQ4plex); K12(iTRAQ4plex) | 1 | 1 |
| [K].gFEPTLEALFGk.[Q]            | N-Term(iTRAQ4plex); K12(iTRAQ4plex) | 1 | 1 |
| [K].vNWEEEEASGLLTSLk.[D]        | N-Term(iTRAQ4plex); K16(iTRAQ4plex) | 1 | 1 |
| [K].fPEVDVLTk.[Y]               | N-Term(iTRAQ4plex); K9(iTRAQ4plex)  | 1 | 1 |
| [R].niQEYLSILTDPDGk.[G]         | N-Term(iTRAQ4plex); K15(iTRAQ4plex) | 1 | 1 |
| [R].niQEYLSILTDPDGk.[G]         | N-Term(iTRAQ4plex); K15(iTRAQ4plex) | 1 | 1 |
| [K].iEFEWNTGTNVDTk.[K]          | N-Term(iTRAQ4plex); K14(iTRAQ4plex) | 1 | 1 |
| [K].NFVASHIANILNSEELDIQDLk.[K]  | K22(iTRAQ4plex)                     | 1 | 1 |
| [K].aTVAVYLESLQDTk.[I]          | N-Term(iTRAQ4plex); K14(iTRAQ4plex) | 1 | 1 |
| [K].svSDGIAALDLNAVANK.[I]       | N-Term(iTRAQ4plex); K17(iTRAQ4plex) | 1 | 1 |
| [K].aDSVVDLLSYNVQGSGETTYDhk.[N] | N-Term(iTRAQ4plex); K23(iTRAQ4plex) | 1 | 1 |
| [K].aLVEQGFVPEIk.[T]            | N-Term(iTRAQ4plex); K13(iTRAQ4plex) | 1 | 1 |
| [K].aLVEQGFVPEIk.[T]            | N-Term(iTRAQ4plex); K13(iTRAQ4plex) | 1 | 1 |

|                                    |                                         |   |   |
|------------------------------------|-----------------------------------------|---|---|
| [K].iAELSATAQEIIk.[S]              | N-Term(iTRAQ4plex); K13(iTRAQ4plex)     | 1 | 1 |
| [K].iAELSATAQEIIk.[S]              | N-Term(iTRAQ4plex); K13(iTRAQ4plex)     | 1 | 1 |
| [K].iAELSATAQEIIk.[S]              | N-Term(iTRAQ4plex); K13(iTRAQ4plex)     | 1 | 1 |
| [K].sVSDGIAALDLNAVANK.[I]          | N-Term(iTRAQ4plex); K17(iTRAQ4plex)     | 1 | 1 |
| [K].sVSDGIAALDLNAVANK.[I]          | N-Term(iTRAQ4plex); K17(iTRAQ4plex)     | 1 | 1 |
| [K].mTSNFPVDLSDYPK.[S]             | N-Term(iTRAQ4plex); K14(iTRAQ4plex)     | 1 | 1 |
| [K].KmTSNFPVDLSDYPK.[S]            | M2(Oxidation); K15(iTRAQ4plex)          | 1 | 1 |
| [K].iAELSATAQEIIk.[S]              | N-Term(iTRAQ4plex); K13(iTRAQ4plex)     | 1 | 1 |
| [K].sVSDGIAALDLNAVANK.[I]          | N-Term(iTRAQ4plex); K17(iTRAQ4plex)     | 1 | 1 |
| [K].yEGLQEWEGk.[A]                 | N-Term(iTRAQ4plex); K10(iTRAQ4plex)     | 1 | 1 |
| [K].yEGLQEWEGk.[A]                 | N-Term(iTRAQ4plex); K10(iTRAQ4plex)     | 1 | 1 |
| [K].tQFNNNEYSQDLDAYNTk.[D]         | N-Term(iTRAQ4plex); K18(iTRAQ4plex)     | 1 | 1 |
| [K].eVYGFNPEGk.[A]                 | N-Term(iTRAQ4plex); K10(iTRAQ4plex)     | 1 | 1 |
| [K].yTYNYEAESSGVPGTADSR.[S]        | N-Term(iTRAQ4plex)                      | 1 | 1 |
| [K].gNVATEISTER.[D]                | N-Term(iTRAQ4plex)                      | 1 | 1 |
| [R].sSVkLQGTSk.[I]                 | N-Term(iTRAQ4plex); K4(iTRAQ4plex)      | 1 | 1 |
| [R].kHVAEAIck.[E]                  | N-Term(iTRAQ4plex); K1(iTRAQ4plex)      | 1 | 1 |
| [R].iLGEELGFASLHDLQLLGk.[L]        | N-Term(iTRAQ4plex); K19(iTRAQ4plex)     | 1 | 1 |
| [R].kHVAEAIck.[E]                  | N-Term(iTRAQ4plex); K1(iTRAQ4plex)      | 1 | 1 |
| [R].iLGEELGFASLHDLQLLGk.[L]        | N-Term(iTRAQ4plex); K19(iTRAQ4plex)     | 1 | 1 |
| [R].kHVAEAIck.[E]                  | N-Term(iTRAQ4plex); C8(Carbamidomethyl) | 1 | 1 |
| [R].kHVAEAIck.[E]                  | K1(iTRAQ4plex); C8(Carbamidomethyl)     | 1 | 1 |
| [R].kGNVATEISTER.[D]               | N-Term(iTRAQ4plex); K1(iTRAQ4plex)      | 1 | 1 |
| [K].nFVASHIANILNSEELDIQDLk.[K]     | N-Term(iTRAQ4plex); K22(iTRAQ4plex)     | 1 | 1 |
| [K].nFVASHIANILNSEELDIQDLk.[K]     | N-Term(iTRAQ4plex); K22(iTRAQ4plex)     | 1 | 1 |
| [K].IEVLNFDQANAQLSNPK.[I]          | N-Term(iTRAQ4plex); K18(iTRAQ4plex)     | 1 | 1 |
| [K].gIStSAASPAVGTVGmDmDEDDDFsk.[W] | N-Term(iTRAQ4plex); M16(Oxidation)      | 1 | 1 |
| [K].gIStSAASPAVGTVGmDmDEDDDFsk.[W] | N-Term(iTRAQ4plex); M16(Oxidation)      | 1 | 1 |
| [K].gIStSAASPAVGTVGmDmDEDDDFsk.[W] | N-Term(iTRAQ4plex); M16(Oxidation)      | 1 | 1 |
| [K].gIStSAASPAVGTVGMDmDEDDDFsk.[W] | N-Term(iTRAQ4plex); M18(Oxidation)      | 1 | 1 |
| [R].sPSQADINK.[I]                  | N-Term(iTRAQ4plex); K9(iTRAQ4plex)      | 1 | 1 |
| [K].tILGTmPAFEVSLQALQk.[A]         | N-Term(iTRAQ4plex); M6(Oxidation)       | 1 | 1 |
| [K].iEIPLPFGGk.[S]                 | N-Term(iTRAQ4plex); K10(iTRAQ4plex)     | 1 | 1 |
| [K].IIVAMSSWLQk.[A]                | N-Term(iTRAQ4plex); K11(iTRAQ4plex)     | 1 | 1 |
| [K].iEIPLPFGGk.[S]                 | N-Term(iTRAQ4plex); K10(iTRAQ4plex)     | 1 | 1 |
| [K].fDHTNSLNIAGLSLDFSSk.[L]        | N-Term(iTRAQ4plex); K19(iTRAQ4plex)     | 1 | 1 |
| [K].iEIPLPFGGk.[S]                 | N-Term(iTRAQ4plex); K10(iTRAQ4plex)     | 1 | 1 |
| [K].aVSMPSFSILGSDVR.[V]            | N-Term(iTRAQ4plex)                      | 1 | 1 |
| [R].IAAYLMLMR.[S]                  | N-Term(iTRAQ4plex)                      | 1 | 1 |
| [R].IAAYLMLMR.[S]                  | N-Term(iTRAQ4plex)                      | 1 | 1 |
| [R].kGNVATEISTER.[D]               | N-Term(iTRAQ4plex); K1(iTRAQ4plex)      | 1 | 1 |
| [K].nmEVSVAATTK.[A]                | N-Term(iTRAQ4plex); M2(Oxidation)       | 1 | 1 |
| [K].sLDEHYHIR.[V]                  | N-Term(iTRAQ4plex)                      | 1 | 1 |
| [R].kGNVATEISTER.[D]               | N-Term(iTRAQ4plex); K1(iTRAQ4plex)      | 1 | 1 |
| [R].kGNVATEISTER.[D]               | N-Term(iTRAQ4plex); K1(iTRAQ4plex)      | 1 | 1 |
| [R].kGNVATEISTER.[D]               | N-Term(iTRAQ4plex); K1(iTRAQ4plex)      | 1 | 1 |
| [R].kGNVATEISTER.[D]               | N-Term(iTRAQ4plex); K1(iTRAQ4plex)      | 1 | 1 |
| [K].aVSMPSFSILGSDVR.[V]            | N-Term(iTRAQ4plex)                      | 1 | 1 |
| [R].tSSFALNLPTLPEVK.[F]            | N-Term(iTRAQ4plex); K15(iTRAQ4plex)     | 1 | 1 |
| [K].IPQQANDYLNSFNWER.[Q]           | N-Term(iTRAQ4plex)                      | 1 | 1 |
| [K].sNTVASLHTEK.[N]                | N-Term(iTRAQ4plex); K11(iTRAQ4plex)     | 1 | 1 |
| [R].tSSFALNLPTLPEVK.[F]            | N-Term(iTRAQ4plex); K15(iTRAQ4plex)     | 1 | 1 |

|                                       |                                |   |   |
|---------------------------------------|--------------------------------|---|---|
| [K].IPQQANDYLNFSNWER.[Q]              | N-Term(iTRAQ4plex)             | 1 | 1 |
| [K].qHIEAIDVR.[V]                     | N-Term(iTRAQ4plex)             | 1 | 1 |
| [K].hVAEAIck.[E]                      | N-Term(iTRAQ4plex); C7(Carbam  | 1 | 1 |
| [K].qHIEAIDVR.[V]                     | N-Term(iTRAQ4plex)             | 1 | 1 |
| [R].tLQGIPQMIGEVR.[K]                 | N-Term(iTRAQ4plex)             | 1 | 1 |
| [R].tLQGIPQMIGEVR.[K]                 | N-Term(iTRAQ4plex)             | 1 | 1 |
| [R].tLQGIPQMIGEVR.[K]                 | N-Term(iTRAQ4plex)             | 1 | 1 |
| [R].sEQADYESLR.[F]                    | N-Term(iTRAQ4plex)             | 1 | 1 |
| [R].tLQGIPQMIGEVR.[K]                 | N-Term(iTRAQ4plex)             | 1 | 1 |
| [K].aASGTTGTYQEWk.[D]                 | N-Term(iTRAQ4plex); K13(iTRAQ  | 1 | 1 |
| [K].eNFAGEATLQR.[I]                   | N-Term(iTRAQ4plex)             | 1 | 1 |
| [K].aASGTTGTYQEWk.[D]                 | N-Term(iTRAQ4plex); K13(iTRAQ  | 1 | 1 |
| [R].SEYQADYESLR.[F]                   |                                | 1 | 1 |
| [R].kYTYNYEAESSGVPGTADSR.[S]          | N-Term(iTRAQ4plex)             | 1 | 1 |
| [R].kYTYNYEAESSGVPGTADSR.[S]          | K1(iTRAQ4plex)                 | 1 | 1 |
| [K].dSYDLHDLk.[I]                     | N-Term(iTRAQ4plex); K9(iTRAQ4  | 1 | 1 |
| [K].eNFAGEATLQR.[I]                   | N-Term(iTRAQ4plex)             | 1 | 1 |
| [K].nSEEFAMMSR.[Y]                    | N-Term(iTRAQ4plex)             | 1 | 1 |
| [K].eNFAGEATLQR.[I]                   | N-Term(iTRAQ4plex)             | 1 | 1 |
| [K].tILGTmPAFEVSLQALQk.[A]            | N-Term(iTRAQ4plex); M6(Oxidati | 1 | 1 |
| [R].IPYTIITPPLk.[D]                   | N-Term(iTRAQ4plex); K12(iTRAQ  | 1 | 1 |
| [R].sEQADYESLR.[F]                    | N-Term(iTRAQ4plex)             | 1 | 1 |
| [R].sEQADYESLR.[F]                    | N-Term(iTRAQ4plex)             | 1 | 1 |
| [K].iEDGTLASK.[T]                     | N-Term(iTRAQ4plex); K9(iTRAQ4  | 1 | 1 |
| [K].tIHDLHLFIENIDFNk.[S]              | N-Term(iTRAQ4plex); K16(iTRAQ  | 1 | 1 |
| [K].tIHDLHLFIENIDFNk.[S]              | N-Term(iTRAQ4plex); K16(iTRAQ  | 1 | 1 |
| [K].tIHDLHLFIENIDFNk.[S]              | N-Term(iTRAQ4plex); K16(iTRAQ  | 1 | 1 |
| [K].tIHDLHLFIENIDFNk.[S]              | N-Term(iTRAQ4plex); K16(iTRAQ  | 1 | 1 |
| [R].hSITNPLAVLcEFISQSIk.[S]           | N-Term(iTRAQ4plex); C11(Carbar | 1 | 1 |
| [R].hSITNPLAVLcEFISQSIk.[S]           | N-Term(iTRAQ4plex); C11(Carbar | 1 | 1 |
| [K].yENYELTLk.[S]                     | N-Term(iTRAQ4plex); K9(iTRAQ4  | 1 | 1 |
| [R].eSDEETQIk.[V]                     | N-Term(iTRAQ4plex); K9(iTRAQ4  | 1 | 1 |
| [K].hLIDSLIDFLNFPR.[F]                | N-Term(iTRAQ4plex)             | 1 | 1 |
| [R].eSDEETQIk.[V]                     | N-Term(iTRAQ4plex); K9(iTRAQ4  | 1 | 1 |
| [K].hLIDSLIDFLNFPR.[F]                | N-Term(iTRAQ4plex)             | 1 | 1 |
| [R].qSMTLSSEVQIPDFDVLGTILR.[V]        | N-Term(iTRAQ4plex)             | 1 | 1 |
| [K].IADFELPTIIVPEQTIEIPSIk.[F]        | K22(iTRAQ4plex)                | 1 | 1 |
| [R].iHSGSFQSQVELSNDQEk.[A]            | N-Term(iTRAQ4plex); K18(iTRAQ  | 1 | 1 |
| [R].iHSGSFQSQVELSNDQEk.[A]            | N-Term(iTRAQ4plex); K18(iTRAQ  | 1 | 1 |
| [R].kYTYNYEAESSGVPGTADSR.[S]          | N-Term(iTRAQ4plex); K1(iTRAQ4  | 1 | 1 |
| [R].kYTYNYEAESSGVPGTADSR.[S]          | N-Term(iTRAQ4plex); K1(iTRAQ4  | 1 | 1 |
| [R].iHSGSFQSQVELSNDQEk.[A]            | N-Term(iTRAQ4plex); K18(iTRAQ  | 1 | 1 |
| [K].nQDVHSINLPFFETLQEYFER.[N]         | N-Term(iTRAQ4plex)             | 1 | 1 |
| [R].iHSGSFQSQVELSNDQEk.[A]            | N-Term(iTRAQ4plex); K18(iTRAQ  | 1 | 1 |
| [K].tTLTAFGFASADLIEIGLEgk.[G]         | N-Term(iTRAQ4plex); K21(iTRAQ  | 1 | 1 |
| [K].ySQPEDSLIPFEITVPESQLTVSQFTLPk.[S] | N-Term(iTRAQ4plex); K30(iTRAQ  | 1 | 1 |
| [K].ySQPEDSLIPFEITVPESQLTVSQFTLPk.[S] | N-Term(iTRAQ4plex); K30(iTRAQ  | 1 | 1 |
| [K].sGSSTASWIQNVDTk.[Y]               | N-Term(iTRAQ4plex); K15(iTRAQ  | 1 | 1 |
| [R].tIDQMLNSELQWPVPDIYLR.[D]          | N-Term(iTRAQ4plex)             | 1 | 1 |
| [K].iADFELPTIIVPEQTIEIPSIk.[F]        | N-Term(iTRAQ4plex); K22(iTRAQ  | 1 | 1 |
| [K].iADFELPTIIVPEQTIEIPSIk.[F]        | N-Term(iTRAQ4plex); K22(iTRAQ  | 1 | 1 |
| [K].iADFELPTIIVPEQTIEIPSIk.[F]        | N-Term(iTRAQ4plex); K22(iTRAQ  | 1 | 1 |

|                                    |                                          |   |   |
|------------------------------------|------------------------------------------|---|---|
| [K].aSGSLPYTQTLQDHLNSLk.[E]        | N-Term(iTRAQ4plex); K19(iTRAQ4plex)      | 1 | 1 |
| [K].yGMVAQVTQTLk.[L]               | N-Term(iTRAQ4plex); K12(iTRAQ4plex)      | 1 | 1 |
| [K].aSGSLPYTQTLQDHLNSLk.[E]        | N-Term(iTRAQ4plex); K19(iTRAQ4plex)      | 1 | 1 |
| [K].aTFQTPDFIVPLTDLR.[I]           | N-Term(iTRAQ4plex)                       | 1 | 1 |
| [R].vPSYTLILPSLELPVLHVPR.[N]       | N-Term(iTRAQ4plex)                       | 1 | 1 |
| [R].dFSAEYEEDGk.[Y]                | N-Term(iTRAQ4plex); K11(iTRAQ4plex)      | 1 | 1 |
| [R].dFSAEYEEDGk.[Y]                | N-Term(iTRAQ4plex); K11(iTRAQ4plex)      | 1 | 1 |
| [R].dFSAEYEEDGk.[Y]                | N-Term(iTRAQ4plex); K11(iTRAQ4plex)      | 1 | 1 |
| [K].sFDYHQFVDETNDk.[I]             | N-Term(iTRAQ4plex); K14(iTRAQ4plex)      | 1 | 1 |
| [K].aTFQTPDFIVPLTDLR.[I]           | N-Term(iTRAQ4plex)                       | 1 | 1 |
| [R].vHANPLLDVVTYLVALIPEPSAQQLR.[E] | N-Term(iTRAQ4plex)                       | 1 | 1 |
| [R].vHANPLLDVVTYLVALIPEPSAQQLR.[E] | N-Term(iTRAQ4plex)                       | 1 | 1 |
| [K].tILGTMPAFEVSLQALQk.[A]         | N-Term(iTRAQ4plex); K18(iTRAQ4plex)      | 1 | 1 |
| [R].tGISPLALik.[G]                 | N-Term(iTRAQ4plex); K10(iTRAQ4plex)      | 1 | 1 |
| [K].tILGTMPAFEVSLQALQk.[A]         | N-Term(iTRAQ4plex); K18(iTRAQ4plex)      | 1 | 1 |
| [R].dFSAEYEEDGk.[Y]                | N-Term(iTRAQ4plex); K11(iTRAQ4plex)      | 1 | 1 |
| [K].vELEVPLcSFILk.[T]              | N-Term(iTRAQ4plex); C9(Carbamidomethyl)  | 1 | 1 |
| [K].vPLLLSEPINIIDALEMR.[D]         | N-Term(iTRAQ4plex)                       | 1 | 1 |
| [K].nSEEFAMMSR.[Y]                 | N-Term(iTRAQ4plex)                       | 1 | 1 |
| [R].kYTYNYEAESSGVPGTADSR.[S]       | N-Term(iTRAQ4plex); K1(iTRAQ4plex)       | 1 | 1 |
| [R].kYTYNYEAESSGVPGTADSR.[S]       | N-Term(iTRAQ4plex); K1(iTRAQ4plex)       | 1 | 1 |
| [K].fSVPAGIVIPSFQALTAR.[F]         | N-Term(iTRAQ4plex)                       | 1 | 1 |
| [K].vPLLLSEPINIIDALEMR.[D]         | N-Term(iTRAQ4plex)                       | 1 | 1 |
| [K].INDLNSVLVMPFTFHVPTDLQVPSck.[L] | N-Term(iTRAQ4plex); C25(Carbamidomethyl) | 1 | 1 |
| [K].dkIGVELTGR.[T]                 | N-Term(iTRAQ4plex); K2(iTRAQ4plex)       | 1 | 1 |
| [K].ISLESLSYFSIESSTk.[G]           | N-Term(iTRAQ4plex); K17(iTRAQ4plex)      | 1 | 1 |
| [K].ISLESLSYFSIESSTk.[G]           | N-Term(iTRAQ4plex); K17(iTRAQ4plex)      | 1 | 1 |
| [R].vPSYTLILPSLELPVLHVPR.[N]       | N-Term(iTRAQ4plex)                       | 1 | 1 |
| [K].vQGVFESHK.[L]                  | N-Term(iTRAQ4plex)                       | 1 | 1 |
| [K].eFNLQNMGLPDFHIPENLFLk.[S]      | N-Term(iTRAQ4plex); K21(iTRAQ4plex)      | 1 | 1 |
| [K].sPAFTDLHLR.[Y]                 | N-Term(iTRAQ4plex)                       | 1 | 1 |
| [K].eSQLPTVMDFR.[K]                | N-Term(iTRAQ4plex)                       | 1 | 1 |
| [K].svSLPSLDPASak.[I]              | N-Term(iTRAQ4plex); K13(iTRAQ4plex)      | 1 | 1 |
| [K].fPEVDVLTk.[Y]                  | N-Term(iTRAQ4plex); K9(iTRAQ4plex)       | 1 | 1 |
| [K].gMALFGEGk.[A]                  | N-Term(iTRAQ4plex); K9(iTRAQ4plex)       | 1 | 1 |
| [R].kGNVATEISTER.[D]               | N-Term(iTRAQ4plex); K1(iTRAQ4plex)       | 1 | 1 |
| [R].IELELRPTGEIEQYSVATYELQR.[E]    | N-Term(iTRAQ4plex)                       | 1 | 1 |
| [K].IEIQSQVDSQHVGHSLTAK.[G]        | N-Term(iTRAQ4plex); K20(iTRAQ4plex)      | 1 | 1 |
| [K].aHLDIAGSLEGLR.[F]              | N-Term(iTRAQ4plex)                       | 1 | 1 |
| [R].ksISAALeHK.[V]                 | N-Term(iTRAQ4plex); K1(iTRAQ4plex)       | 1 | 1 |
| [R].mYQMDIQQLQR.[Y]                | N-Term(iTRAQ4plex)                       | 1 | 1 |
| [K].IDVTTSIGR.[R]                  | N-Term(iTRAQ4plex)                       | 1 | 1 |
| [K].IAELSATAQEIIk.[S]              | K13(iTRAQ4plex)                          | 1 | 1 |
| [K].yHWEHTGLTLR.[E]                | N-Term(iTRAQ4plex)                       | 1 | 1 |
| [K].nIILPVYDk.[S]                  | N-Term(iTRAQ4plex); K9(iTRAQ4plex)       | 1 | 1 |
| [R].TLQGIPQMIGEVIR.[K]             |                                          | 1 | 1 |
| [K].IDVTTSIGR.[R]                  | N-Term(iTRAQ4plex)                       | 1 | 1 |
| [R].iHSGSFQSQVELSNDQEk.[A]         | N-Term(iTRAQ4plex); K18(iTRAQ4plex)      | 1 | 1 |
| [K].aGHIAWTSSGk.[G]                | N-Term(iTRAQ4plex); K11(iTRAQ4plex)      | 1 | 1 |
| [R].QTIIIVLENVQR.[N]               |                                          | 1 | 1 |
| [K].hiYAISSAALSASYk.[A]            | N-Term(iTRAQ4plex); K15(iTRAQ4plex)      | 1 | 1 |
| [K].yHWEHTGLTLR.[E]                | N-Term(iTRAQ4plex)                       | 1 | 1 |

|                                  |                                |   |   |
|----------------------------------|--------------------------------|---|---|
| [K].svGFHLPSR.[E]                | N-Term(iTRAQ4plex)             | 1 | 1 |
| [K].eNFAGEATLQR.[I]              | N-Term(iTRAQ4plex)             | 1 | 1 |
| [K].kMGLAFESTk.[S]               | N-Term(iTRAQ4plex); K1(iTRAQ4  | 1 | 1 |
| [K].qVFLYPEk.[D]                 | N-Term(iTRAQ4plex); K8(iTRAQ4  | 1 | 1 |
| [R].sEYQADYESLR.[F]              | N-Term(iTRAQ4plex)             | 1 | 1 |
| [R].aLVDTLk.[F]                  | N-Term(iTRAQ4plex); K7(iTRAQ4  | 1 | 1 |
| [K].gMTRPLSTLISSQScQYTLDAk.[R]   | N-Term(iTRAQ4plex); C16(Carbar | 1 | 1 |
| [R].qTIIVVLENVQR.[N]             | N-Term(iTRAQ4plex)             | 1 | 1 |
| [K].hINIDQFVR.[K]                | N-Term(iTRAQ4plex)             | 1 | 1 |
| [K].iAIANIIDEIEk.[L]             | N-Term(iTRAQ4plex); K13(iTRAQ  | 1 | 1 |
| [K].iAELSATAQEIIk.[S]            | N-Term(iTRAQ4plex); K13(iTRAQ  | 1 | 1 |
| [K].FSVPAGIVIPSFQALTAR.[F]       |                                | 1 | 1 |
| [K].IATALSLSNk.[F]               | N-Term(iTRAQ4plex); K10(iTRAQ  | 1 | 1 |
| [R].kYTYNYEAESSGVPGTADSR.[S]     | N-Term(iTRAQ4plex); K1(iTRAQ4  | 1 | 1 |
| [K].aTGVLVDYVnk.[Y]              | N-Term(iTRAQ4plex); K11(iTRAQ  | 1 | 1 |
| [K].dFSLWEk.[T]                  | N-Term(iTRAQ4plex); K7(iTRAQ4  | 1 | 1 |
| [R].nNALDFVtk.[S]                | N-Term(iTRAQ4plex); K9(iTRAQ4  | 1 | 1 |
| [K].svGFHLPSR.[E]                | N-Term(iTRAQ4plex)             | 1 | 1 |
| [K].nMEVSVATTTk.[A]              | N-Term(iTRAQ4plex); K11(iTRAQ  | 1 | 1 |
| [K].IDFSSQADLR.[N]               | N-Term(iTRAQ4plex)             | 1 | 1 |
| [K].IALWGEHTGQLYSk.[F]           | N-Term(iTRAQ4plex); K14(iTRAQ  | 1 | 1 |
| [K].eVYGFNPEGk.[A]               | N-Term(iTRAQ4plex); K10(iTRAQ  | 1 | 1 |
| [K].fLDMLIk.[K]                  | N-Term(iTRAQ4plex); K7(iTRAQ4  | 1 | 1 |
| [K].fDHTNSLNIAGLSLDFSSk.[L]      | N-Term(iTRAQ4plex); K19(iTRAQ  | 1 | 1 |
| [R].aLVDTLk.[F]                  | N-Term(iTRAQ4plex); K7(iTRAQ4  | 1 | 1 |
| [R].vLLDQLGTTISFER.[I]           | N-Term(iTRAQ4plex)             | 1 | 1 |
| [K].iGVELTGR.[T]                 | N-Term(iTRAQ4plex)             | 1 | 1 |
| [K].TEVIPPLIENR.[Q]              |                                | 1 | 1 |
| [R].eSDEETQIk.[V]                | N-Term(iTRAQ4plex); K9(iTRAQ4  | 1 | 1 |
| [R].IELELRPTGEIEQYSVSATYELQR.[E] | N-Term(iTRAQ4plex)             | 1 | 1 |
| [K].qVFLYPEkDEPTYILNIk.[R]       | N-Term(iTRAQ4plex); K8(iTRAQ4  | 1 | 1 |
| [R].FQFPGkPGIYTR.[E]             | K6(iTRAQ4plex)                 | 1 | 1 |
| [R].dFSAEYEEEDGk.[Y]             | N-Term(iTRAQ4plex); K11(iTRAQ  | 1 | 1 |
| [K].eVYGFNPEGk.[A]               | N-Term(iTRAQ4plex); K10(iTRAQ  | 1 | 1 |
| [K].NSEEFAAAMSR.[Y]              |                                | 1 | 1 |
| [K].ENFAGEATLQR.[I]              |                                | 1 | 1 |
| [K].fRETLEDTR.[D]                | N-Term(iTRAQ4plex)             | 1 | 1 |
| [K].sPAFTDLHLR.[Y]               | N-Term(iTRAQ4plex)             | 1 | 1 |
| [K].IEDGTLASK.[T]                | K9(iTRAQ4plex)                 | 1 | 1 |
| [K].ITISEQNIQR.[A]               | N-Term(iTRAQ4plex)             | 1 | 1 |
| [K].EVYGFNPEGk.[A]               | K10(iTRAQ4plex)                | 1 | 1 |
| [K].nSEEFAAAMSR.[Y]              | N-Term(iTRAQ4plex)             | 1 | 1 |
| [K].vSALLTPAEQTGTWk.[L]          | N-Term(iTRAQ4plex); K15(iTRAQ  | 1 | 1 |
| [R].VNDESTEGKTSYR.[L]            | K9(iTRAQ4plex)                 | 1 | 1 |
| [R].kGNVATEISTER.[D]             | N-Term(iTRAQ4plex); K1(iTRAQ4  | 1 | 1 |
| [K].fPEVDVLTk.[Y]                | K9(iTRAQ4plex)                 | 1 | 1 |
| [K].nSEEFAAAmSR.[Y]              | N-Term(iTRAQ4plex); M9(Oxidati | 1 | 1 |
| [K].iAELSATAQEIIk.[S]            | N-Term(iTRAQ4plex); K13(iTRAQ  | 1 | 1 |
| [K].fPEVDVLTk.[Y]                | N-Term(iTRAQ4plex); K9(iTRAQ4  | 1 | 1 |
| [K].ATGVLYDYVnk.[Y]              | K11(iTRAQ4plex)                | 1 | 1 |
| [K].nSLkIEIPLPFGGk.[S]           | N-Term(iTRAQ4plex); K4(iTRAQ4  | 1 | 1 |
| [R].hiQNIDIQHLAGk.[L]            | N-Term(iTRAQ4plex); K13(iTRAQ  | 1 | 1 |

|                            |                                     |   |   |
|----------------------------|-------------------------------------|---|---|
| [K].aHLDIAGSLEGHLR.[F]     | N-Term(iTRAQ4plex)                  | 1 | 1 |
| [R].tLADLTLLDSPIk.[V]      | N-Term(iTRAQ4plex); K13(iTRAQ4plex) | 1 | 1 |
| [K].tEVIPPLIENR.[Q]        | N-Term(iTRAQ4plex)                  | 1 | 1 |
| [R].gIIALLVPPETEAAk.[Q]    | N-Term(iTRAQ4plex); K16(iTRAQ4plex) | 1 | 1 |
| [R].qTIIVVLENVQR.[N]       | N-Term(iTRAQ4plex)                  | 1 | 1 |
| [K].hINIDQFVR.[K]          | N-Term(iTRAQ4plex)                  | 1 | 1 |
| [R].kGNVATEISTER.[D]       | N-Term(iTRAQ4plex); K1(iTRAQ4plex)  | 1 | 1 |
| [K].kLTISEQNIQR.[A]        | N-Term(iTRAQ4plex); K1(iTRAQ4plex)  | 1 | 1 |
| [R].VTQEFHmk.[V]           | K8(iTRAQ4plex)                      | 1 | 1 |
| [K].ATGVLYDYVnk.[Y]        | K11(iTRAQ4plex)                     | 1 | 1 |
| [R].TPALHFk.[S]            | K7(iTRAQ4plex)                      | 1 | 1 |
| [K].ISNVLQQVk.[I]          | N-Term(iTRAQ4plex); K9(iTRAQ4plex)  | 1 | 1 |
| [K].aLYWVNGQVPDGVSk.[V]    | N-Term(iTRAQ4plex); K15(iTRAQ4plex) | 1 | 1 |
| [R].IPYTIITPPLk.[D]        | N-Term(iTRAQ4plex); K12(iTRAQ4plex) | 1 | 1 |
| [K].eVYGFNPEGk.[A]         | N-Term(iTRAQ4plex); K10(iTRAQ4plex) | 1 | 1 |
| [R].vNQNLVYESGSLNFSk.[L]   | N-Term(iTRAQ4plex); K16(iTRAQ4plex) | 1 | 1 |
| [K].IFLEETk.[A]            | N-Term(iTRAQ4plex); K7(iTRAQ4plex)  | 1 | 1 |
| [K].aHLDIAGSLEGHLR.[F]     | N-Term(iTRAQ4plex)                  | 1 | 1 |
| [K].sQAIATk.[K]            | N-Term(iTRAQ4plex); K7(iTRAQ4plex)  | 1 | 1 |
| [K].LDVTTSIGR.[R]          |                                     | 1 | 1 |
| [K].eSQLPTVmDFR.[K]        | N-Term(iTRAQ4plex); M8(Oxidation)   | 1 | 1 |
| [R].eFQVPTFTIPk.[L]        | N-Term(iTRAQ4plex); K11(iTRAQ4plex) | 1 | 1 |
| [R].qIDDIDVR.[F]           | N-Term(iTRAQ4plex)                  | 1 | 1 |
| [K].dNVFDGLVR.[V]          | N-Term(iTRAQ4plex)                  | 1 | 1 |
| [K].sLWDFLk.[L]            | N-Term(iTRAQ4plex); K7(iTRAQ4plex)  | 1 | 1 |
| [K].fVTAEGAk.[Q]           | N-Term(iTRAQ4plex); K9(iTRAQ4plex)  | 1 | 1 |
| [K].yNALDLTNNgk.[L]        | N-Term(iTRAQ4plex); K11(iTRAQ4plex) | 1 | 1 |
| [K].IAIPEGk.[Q]            | N-Term(iTRAQ4plex); K7(iTRAQ4plex)  | 1 | 1 |
| [K].qGFFPDSVnk.[A]         | N-Term(iTRAQ4plex); K10(iTRAQ4plex) | 1 | 1 |
| [K].iEFEWNTGTNVDTk.[K]     | N-Term(iTRAQ4plex); K14(iTRAQ4plex) | 1 | 1 |
| [R].dAVEkPQEFTIVAFVk.[Y]   | N-Term(iTRAQ4plex); K5(iTRAQ4plex)  | 1 | 1 |
| [K].nMEVSVATTTk.[A]        | N-Term(iTRAQ4plex); K11(iTRAQ4plex) | 1 | 1 |
| [K].ILLQmDSSATAYGSTVSk.[R] | N-Term(iTRAQ4plex); M5(Oxidation)   | 1 | 1 |
| [K].YHWEHTGLTLR.[E]        |                                     | 1 | 1 |
| [K].ILSGGNTLHLVSTTk.[T]    | N-Term(iTRAQ4plex); K15(iTRAQ4plex) | 1 | 1 |
| [R].iYSLWEHSTk.[N]         | N-Term(iTRAQ4plex); K10(iTRAQ4plex) | 1 | 1 |
| [K].gTYGLScQR.[D]          | N-Term(iTRAQ4plex); C7(Carbamid)    | 1 | 1 |
| [R].ITENDIQIALDDAk.[I]     | K14(iTRAQ4plex)                     | 1 | 1 |
| [K].sLHMYANR.[L]           | N-Term(iTRAQ4plex)                  | 1 | 1 |
| [K].gAYQNNEIk.[H]          | N-Term(iTRAQ4plex); K9(iTRAQ4plex)  | 1 | 1 |
| [K].sLHMYANR.[L]           | N-Term(iTRAQ4plex)                  | 1 | 1 |
| [K].sLHMYANR.[L]           | N-Term(iTRAQ4plex)                  | 1 | 1 |
| [K].sISAALeHk.[V]          | N-Term(iTRAQ4plex); K9(iTRAQ4plex)  | 1 | 1 |
| [K].aTGVLVLYDYVnk.[Y]      | N-Term(iTRAQ4plex); K11(iTRAQ4plex) | 1 | 1 |
| [K].FVTAEGAk.[Q]           | K9(iTRAQ4plex)                      | 1 | 1 |
| [R].iGQDGISTSATTNLk.[C]    | N-Term(iTRAQ4plex); K15(iTRAQ4plex) | 1 | 1 |
| [K].YHWEHTGLTLR.[E]        |                                     | 1 | 1 |
| [K].tSQcTLk.[E]            | N-Term(iTRAQ4plex); C4(Carbamid)    | 1 | 1 |
| [K].iVQILPWEQNEQVk.[N]     | N-Term(iTRAQ4plex); K14(iTRAQ4plex) | 1 | 1 |
| [K].mGLAFESTk.[S]          | N-Term(iTRAQ4plex); K9(iTRAQ4plex)  | 1 | 1 |
| [K].ISLPDFk.[E]            | N-Term(iTRAQ4plex); K7(iTRAQ4plex)  | 1 | 1 |
| [K].SPAFTDLHLR.[Y]         | N-Term(iTRAQ4plex)                  | 1 | 1 |



|                                |                                |   |   |
|--------------------------------|--------------------------------|---|---|
| [K].gMALFGEGk.[A]              | N-Term(iTRAQ4plex); K9(iTRAQ4  | 1 | 1 |
| [R].mNFkQELNGNTk.[S]           | N-Term(iTRAQ4plex); K4(iTRAQ4  | 1 | 1 |
| [K].iNPLALK.[E]                | N-Term(iTRAQ4plex); K7(iTRAQ4  | 1 | 1 |
| [K].tEVIPPLIENR.[Q]            | N-Term(iTRAQ4plex)             | 1 | 1 |
| [R].NLQNNAEWVYQGAIR.[Q]        |                                | 1 | 1 |
| [K].svGFHLPSR.[E]              | N-Term(iTRAQ4plex)             | 1 | 1 |
| [K].dEPTYILNIk.[R]             | N-Term(iTRAQ4plex); K10(iTRAQ  | 1 | 1 |
| [K].dFSLWEk.[T]                | N-Term(iTRAQ4plex); K7(iTRAQ4  | 1 | 1 |
| [K].kMTSNFPVDLSDYPk.[S]        | N-Term(iTRAQ4plex); K1(iTRAQ4  | 1 | 1 |
| [R].iPSVQINfk.[D]              | N-Term(iTRAQ4plex); K9(iTRAQ4  | 1 | 1 |
| [R].iLGEELGFASLHDLQLLGk.[L]    | N-Term(iTRAQ4plex); K19(iTRAQ  | 1 | 1 |
| [K].vNWEEEEASGLLTSk.[D]        | N-Term(iTRAQ4plex); K16(iTRAQ  | 1 | 1 |
| [K].dNVFDGLVR.[V]              | N-Term(iTRAQ4plex)             | 1 | 1 |
| [K].iEFEWNTGTNVDTk.[K]         | N-Term(iTRAQ4plex); K14(iTRAQ  | 1 | 1 |
| [R].eFQVPTFTIPk.[L]            | N-Term(iTRAQ4plex); K11(iTRAQ  | 1 | 1 |
| [R].kYTYNYEAESSGVPGTADSR.[S]   | N-Term(iTRAQ4plex); K1(iTRAQ4  | 1 | 1 |
| [K].tSQcTLk.[E]                | N-Term(iTRAQ4plex); C4(Carbam  | 1 | 1 |
| [K].ATGVLYDYVnk.[Y]            | K11(iTRAQ4plex)                | 1 | 1 |
| [K].iEFEWNTGTNVDTk.[K]         | N-Term(iTRAQ4plex); K14(iTRAQ  | 1 | 1 |
| [K].gNVATEISTER.[D]            | N-Term(iTRAQ4plex)             | 1 | 1 |
| [K].nFVASHIANILNSEELDIQDLk.[K] | N-Term(iTRAQ4plex); K22(iTRAQ  | 1 | 1 |
| [R].eSDEETQk.[V]               | N-Term(iTRAQ4plex); K9(iTRAQ4  | 1 | 1 |
| [R].qIDDIDVR.[F]               | N-Term(iTRAQ4plex)             | 1 | 1 |
| [K].TFIEDVnk.[F]               | K8(iTRAQ4plex)                 | 1 | 1 |
| [K].SVSLPSLDPASAK.[I]          | K13(iTRAQ4plex)                | 1 | 1 |
| [K].qAEAVLk.[T]                | N-Term(iTRAQ4plex); K7(iTRAQ4  | 1 | 1 |
| [K].IIVAmSSWLQk.[A]            | N-Term(iTRAQ4plex); M5(Oxidati | 1 | 1 |
| [K].nSEEFAAAMSR.[Y]            | N-Term(iTRAQ4plex)             | 1 | 1 |
| [K].kIISDYHQQFR.[Y]            | N-Term(iTRAQ4plex); K1(iTRAQ4  | 1 | 1 |
| [R].ITLDIQNkk.[I]              | N-Term(iTRAQ4plex); K8(iTRAQ4  | 1 | 1 |
| [K].tkNSEEFAAAMSR.[Y]          | N-Term(iTRAQ4plex); K2(iTRAQ4  | 1 | 1 |
| [R].NNALDFVTK.[S]              | K9(iTRAQ4plex)                 | 1 | 1 |
| [R].QIDDIDVR.[F]               |                                | 1 | 1 |
| [K].yHWEHTGLTLR.[E]            | N-Term(iTRAQ4plex)             | 1 | 1 |
| [R].tLADLTLLDSPIk.[V]          | N-Term(iTRAQ4plex); K13(iTRAQ  | 1 | 1 |
| [K].aEPLAFTFSHDYk.[G]          | N-Term(iTRAQ4plex); K13(iTRAQ  | 1 | 1 |
| [R].eSDEETQk.[V]               | N-Term(iTRAQ4plex); K9(iTRAQ4  | 1 | 1 |
| [K].IVQILPWEQNEQVk.[N]         | K14(iTRAQ4plex)                | 1 | 1 |
| [K].IIDVISMYR.[E]              | N-Term(iTRAQ4plex)             | 1 | 1 |
| [K].yHWEHTGLTLR.[E]            | N-Term(iTRAQ4plex)             | 1 | 1 |
| [R].eELcTMFIR.[E]              | N-Term(iTRAQ4plex); C4(Carbam  | 1 | 1 |
| [K].IISDYHQQFR.[Y]             |                                | 1 | 1 |
| [K].qGFFPDSVnk.[A]             | N-Term(iTRAQ4plex); K10(iTRAQ  | 1 | 1 |
| [R].fQFPgkPGIYTR.[E]           | N-Term(iTRAQ4plex); K6(iTRAQ4  | 1 | 1 |
| [K].ITISEQNIQR.[A]             | N-Term(iTRAQ4plex)             | 1 | 1 |
| [K].AHLDIAGSLEGHLR.[F]         |                                | 1 | 1 |
| [K].sLHMYANR.[L]               | N-Term(iTRAQ4plex)             | 1 | 1 |
| [K].svGFHLPSR.[E]              | N-Term(iTRAQ4plex)             | 1 | 1 |
| [R].mYQmDIQQELQR.[Y]           | N-Term(iTRAQ4plex); M1(Oxidati | 1 | 1 |
| [K].nSLkIEIPLPFGGk.[S]         | N-Term(iTRAQ4plex); K4(iTRAQ4  | 1 | 1 |
| [K].yENYELTLk.[S]              | N-Term(iTRAQ4plex); K9(iTRAQ4  | 1 | 1 |
| [R].LNGEIQAELPQk.[A]           | K13(iTRAQ4plex)                | 1 | 1 |

|                                  |                                |   |   |
|----------------------------------|--------------------------------|---|---|
| [R].ITLPDFR.[L]                  |                                | 1 | 1 |
| [R].TGISPLALIk.[G]               | K10(iTRAQ4plex)                | 1 | 1 |
| [K].eSQLPTVmDFR.[K]              | N-Term(iTRAQ4plex); M8(Oxidati | 1 | 1 |
| [K].eNLcLNLHk.[F]                | N-Term(iTRAQ4plex); C4(Carbam  | 1 | 1 |
| [R].VSSFYAk.[G]                  | K7(iTRAQ4plex)                 | 1 | 1 |
| [K].SHDELPR.[T]                  | N-Term(iTRAQ4plex)             | 1 | 1 |
| [K].gAYQNNEIk.[H]                | N-Term(iTRAQ4plex); K9(iTRAQ4  | 1 | 1 |
| [R].vIGNmGQTMEQLTPELk.[S]        | N-Term(iTRAQ4plex); M5(Oxidati | 1 | 1 |
| [K].gFEPTLEALFGk.[Q]             | N-Term(iTRAQ4plex); K12(iTRAQ  | 1 | 1 |
| [R].IELELRPTGEIEQYSVSATYELQR.[E] | N-Term(iTRAQ4plex)             | 1 | 1 |
| [K].kLTISEQNIQR.[A]              | N-Term(iTRAQ4plex)             | 1 | 1 |
| [K].kLTISEQNIQR.[A]              | K1(iTRAQ4plex)                 | 1 | 1 |
| [K].ILLQMDSSATAYGSTVSk.[R]       | N-Term(iTRAQ4plex); K18(iTRAQ  | 1 | 1 |
| [K].FVTOAEGAk.[Q]                | K9(iTRAQ4plex)                 | 1 | 1 |
| [R].SPSQADINK.[I]                | K9(iTRAQ4plex)                 | 1 | 1 |
| [R].HIQNIDIQHLAGk.[L]            | K13(iTRAQ4plex)                | 1 | 1 |
| [K].IFLEETk.[A]                  | N-Term(iTRAQ4plex); K7(iTRAQ4  | 1 | 1 |
| [K].nLLVALk.[D]                  | N-Term(iTRAQ4plex); K7(iTRAQ4  | 1 | 1 |
| [K].sLHmYANR.[L]                 | N-Term(iTRAQ4plex); M4(Oxidati | 1 | 1 |
| [K].qSFDLSVk.[A]                 | N-Term(iTRAQ4plex); K8(iTRAQ4  | 1 | 1 |
| [K].iEGNLI FDPNNYLpk.[E]         | N-Term(iTRAQ4plex); K15(iTRAQ  | 1 | 1 |
| [K].iNPLALK.[E]                  | N-Term(iTRAQ4plex); K7(iTRAQ4  | 1 | 1 |
| [R].aTLYALSHAVNNYHk.[T]          | N-Term(iTRAQ4plex); K15(iTRAQ  | 1 | 1 |
| [R].SPSQADINK.[I]                | N-Term(iTRAQ4plex); K9(iTRAQ4  | 1 | 1 |
| [R].vPQTDMTFR.[H]                | N-Term(iTRAQ4plex)             | 1 | 1 |
| [R].IELELRPTGEIEQYSVSATYELQR.[E] | N-Term(iTRAQ4plex)             | 1 | 1 |
| [K].tGLkeFLk.[T]                 | N-Term(iTRAQ4plex); K4(iTRAQ4  | 1 | 1 |
| [K].sLWDFLk.[L]                  | N-Term(iTRAQ4plex); K7(iTRAQ4  | 1 | 1 |
| [K].SHDELPR.[T]                  | N-Term(iTRAQ4plex)             | 1 | 1 |
| [K].FLDSNIk.[F]                  | K7(iTRAQ4plex)                 | 1 | 1 |
| [K].wNFYYSPOQSSPDkk.[L]          | N-Term(iTRAQ4plex); K13(iTRAQ  | 1 | 1 |
| [K].cVQSTkPSLMIQk.[A]            | C1(Carbamidomethyl); K6(iTRAC  | 1 | 1 |
| [K].aHLDIAGSLEGLHR.[F]           | N-Term(iTRAQ4plex)             | 1 | 1 |
| [K].sLHMYANR.[L]                 | N-Term(iTRAQ4plex)             | 1 | 1 |
| [K].SVGFHLPSR.[E]                |                                | 1 | 1 |
| [R].SPSQADINK.[I]                | N-Term(iTRAQ4plex); K9(iTRAQ4  | 1 | 1 |
| [K].SGSSTASWIQNVDTk.[Y]          | K15(iTRAQ4plex)                | 1 | 1 |
| [K].iAIANIIDEIIEk.[L]            | N-Term(iTRAQ4plex); K13(iTRAQ  | 1 | 1 |
| [K].IEDGTLASK.[T]                | K9(iTRAQ4plex)                 | 1 | 1 |
| [R].eIFNMAR.[D]                  | N-Term(iTRAQ4plex)             | 1 | 1 |
| [K].mGLAFESTk.[S]                | N-Term(iTRAQ4plex); K9(iTRAQ4  | 1 | 1 |
| [K].mTSNFPVDLSDYpk.[S]           | N-Term(iTRAQ4plex); K14(iTRAQ  | 1 | 1 |
| [K].yEGLQEWEGk.[A]               | N-Term(iTRAQ4plex); K10(iTRAQ  | 1 | 1 |
| [R].vkYTLNk.[N]                  | N-Term(iTRAQ4plex); K2(iTRAQ4  | 1 | 1 |
| [K].yHWEHTGLTLR.[E]              | N-Term(iTRAQ4plex)             | 1 | 1 |
| [K].qAEAVLk.[T]                  | N-Term(iTRAQ4plex); K7(iTRAQ4  | 1 | 1 |
| [R].SEILAHWSPAk.[L]              | K11(iTRAQ4plex)                | 1 | 1 |
| [K].mGLAFESTk.[S]                | N-Term(iTRAQ4plex); K9(iTRAQ4  | 1 | 1 |
| [K].eQHFLFPFSYk.[N]              | N-Term(iTRAQ4plex); K11(iTRAQ  | 1 | 1 |
| [K].sQAIATk.[K]                  | N-Term(iTRAQ4plex); K7(iTRAQ4  | 1 | 1 |
| [K].eSQLPTVMDFR.[K]              | N-Term(iTRAQ4plex)             | 1 | 1 |
| [K].sLHmYANR.[L]                 | N-Term(iTRAQ4plex); M4(Oxidati | 1 | 1 |

|                               |                                |   |   |
|-------------------------------|--------------------------------|---|---|
| [K].iTEVALMGHLSdDTk.[E]       | N-Term(iTRAQ4plex); C12(Carbar | 1 | 1 |
| [K].MTSNFPVDSLSDYPk.[S]       | K14(iTRAQ4plex)                | 1 | 1 |
| [K].IkQHIEAIDVR.[V]           | N-Term(iTRAQ4plex); K2(iTRAQ4  | 1 | 1 |
| [K].NIILPVYDk.[S]             | K9(iTRAQ4plex)                 | 1 | 1 |
| [R].eFQVPTFTIPk.[L]           | N-Term(iTRAQ4plex); K11(iTRAQ  | 1 | 1 |
| [K].VEDIPLAR.[I]              |                                | 1 | 1 |
| [R].QIDDIDVR.[F]              |                                | 1 | 1 |
| [R].vAWHYDEEK.[I]             | N-Term(iTRAQ4plex); K9(iTRAQ4  | 1 | 1 |
| [R].kGNVATEISTER.[D]          | N-Term(iTRAQ4plex)             | 1 | 1 |
| [K].avSmPSFSILGSDVR.[V]       | N-Term(iTRAQ4plex); M4(Oxidati | 1 | 1 |
| [R].kGNVATEISTER.[D]          | K1(iTRAQ4plex)                 | 1 | 1 |
| [R].eSDEETQIk.[V]             | N-Term(iTRAQ4plex); K9(iTRAQ4  | 1 | 1 |
| [K].aTVAVYLESLQDTk.[I]        | N-Term(iTRAQ4plex); K14(iTRAQ  | 1 | 1 |
| [R].mYQMDIQQELQR.[Y]          | N-Term(iTRAQ4plex)             | 1 | 1 |
| [K].mGLAFESTk.[S]             | N-Term(iTRAQ4plex); M1(Oxidati | 1 | 1 |
| [K].iISDYHQQFR.[Y]            | N-Term(iTRAQ4plex)             | 1 | 1 |
| [K].qTEATMTFk.[Y]             | N-Term(iTRAQ4plex); K9(iTRAQ4  | 1 | 1 |
| [K].nPNGYSFSIPVk.[V]          | N-Term(iTRAQ4plex); K12(iTRAQ  | 1 | 1 |
| [K].wNFYSPQSSPDkk.[L]         | N-Term(iTRAQ4plex); K13(iTRAQ  | 1 | 1 |
| [R].vSTAFVYTk.[N]             | N-Term(iTRAQ4plex); K9(iTRAQ4  | 1 | 1 |
| [K].aTVAVYLESLQDTk.[I]        | N-Term(iTRAQ4plex); K14(iTRAQ  | 1 | 1 |
| [K].iDDIWNLEVk.[E]            | N-Term(iTRAQ4plex); K10(iTRAQ  | 1 | 1 |
| [R].TLADLTLLDSPIk.[V]         | K13(iTRAQ4plex)                | 1 | 1 |
| [K].NSEEFAAAMSR.[Y]           |                                | 1 | 1 |
| [K].ALVEQGFTVPEIk.[T]         | K13(iTRAQ4plex)                | 1 | 1 |
| [K].dNVFDGLVR.[V]             | N-Term(iTRAQ4plex)             | 1 | 1 |
| [K].mGLAFESTk.[S]             | N-Term(iTRAQ4plex); K9(iTRAQ4  | 1 | 1 |
| [K].MGLAFESTk.[S]             | K9(iTRAQ4plex)                 | 1 | 1 |
| [K].aHLDIAGSLEGHLR.[F]        | N-Term(iTRAQ4plex)             | 1 | 1 |
| [R].eELcTMFIR.[E]             | N-Term(iTRAQ4plex); C4(Carbam  | 1 | 1 |
| [K].aTGVLVDYVnk.[Y]           | N-Term(iTRAQ4plex); K11(iTRAQ  | 1 | 1 |
| [K].sLHMYANR.[L]              | N-Term(iTRAQ4plex)             | 1 | 1 |
| [K].fPEVDVLTK.[Y]             | N-Term(iTRAQ4plex); K9(iTRAQ4  | 1 | 1 |
| [R].nLQNNAEWVYQGAIR.[Q]       | N-Term(iTRAQ4plex)             | 1 | 1 |
| [R].dFSAEYEEDGk.[Y]           | N-Term(iTRAQ4plex); K11(iTRAQ  | 1 | 1 |
| [K].ILSGGNTLHLVSTTk.[T]       | N-Term(iTRAQ4plex); K15(iTRAQ  | 1 | 1 |
| [K].aTGVLVDYVnk.[Y]           | N-Term(iTRAQ4plex); K11(iTRAQ  | 1 | 1 |
| [K].mTSNFPVDSLSDYPk.[S]       | N-Term(iTRAQ4plex); M1(Oxidati | 1 | 1 |
| [K].tEVIPLIENR.[Q]            | N-Term(iTRAQ4plex)             | 1 | 1 |
| [R].rNLQNNAEWVYQGAIR.[Q]      | N-Term(iTRAQ4plex)             | 1 | 1 |
| [K].sLHmYANR.[L]              | N-Term(iTRAQ4plex); M4(Oxidati | 1 | 1 |
| [K].sQAIATk.[K]               | N-Term(iTRAQ4plex); K7(iTRAQ4  | 1 | 1 |
| [K].aSGSLPYTQTLQDHLNSLk.[E]   | N-Term(iTRAQ4plex); K19(iTRAQ  | 1 | 1 |
| [R].eVGTVLSQVYSK.[V]          | N-Term(iTRAQ4plex); K12(iTRAQ  | 1 | 1 |
| [R].dFSAEYEEDGkYEGLQEWEGk.[A] | N-Term(iTRAQ4plex); K11(iTRAQ  | 1 | 1 |
| [K].IkQHIEAIDVR.[V]           | N-Term(iTRAQ4plex); K2(iTRAQ4  | 1 | 1 |
| [K].fPEVDVLTK.[Y]             | N-Term(iTRAQ4plex); K9(iTRAQ4  | 1 | 1 |
| [R].FFGEGTk.[K]               | K7(iTRAQ4plex)                 | 1 | 1 |
| [R].eSDEETQIk.[V]             | N-Term(iTRAQ4plex); K9(iTRAQ4  | 1 | 1 |
| [R].iYSLWEHSTk.[N]            | N-Term(iTRAQ4plex); K10(iTRAQ  | 1 | 1 |
| [K].qTEATmTFk.[Y]             | N-Term(iTRAQ4plex); M6(Oxidati | 1 | 1 |
| [K].nLTDFAEQYSIQDWak.[R]      | N-Term(iTRAQ4plex); K16(iTRAQ  | 1 | 1 |

|                                 |                               |   |   |
|---------------------------------|-------------------------------|---|---|
| [R].dAVEkPQEFTIVAFvk.[Y]        | N-Term(iTRAQ4plex); K5(iTRAQ4 | 1 | 1 |
| [RK].aAIQALR.[RK]               | N-Term(iTRAQ4plex)            | 1 | 1 |
| [K].iEGNLIFDPNNYLpk.[E]         | N-Term(iTRAQ4plex); K15(iTRAQ | 1 | 1 |
| [K].shDELPR.[T]                 | N-Term(iTRAQ4plex)            | 1 | 1 |
| [K].IIVAMSSWLQk.[A]             | N-Term(iTRAQ4plex); K11(iTRAQ | 1 | 1 |
| [K].aVSMPSFSILGSDVR.[V]         | N-Term(iTRAQ4plex)            | 1 | 1 |
| [K].qTEATmTFk.[Y]               | N-Term(iTRAQ4plex); M6(Oxidat | 1 | 1 |
| [R].TGISPLALIk.[G]              | K10(iTRAQ4plex)               | 1 | 1 |
| [K].IQSTTVMNPMYk.[L]            | N-Term(iTRAQ4plex); K12(iTRAQ | 1 | 1 |
| [K].shDELPR.[T]                 | N-Term(iTRAQ4plex)            | 1 | 1 |
| [K].dNVFDGLVR.[V]               | N-Term(iTRAQ4plex)            | 1 | 1 |
| [R].eSDEETQIk.[V]               | N-Term(iTRAQ4plex); K9(iTRAQ4 | 1 | 1 |
| [R].VRESDEETQIk.[V]             | K11(iTRAQ4plex)               | 1 | 1 |
| [R].vPQTDMTFR.[H]               | N-Term(iTRAQ4plex)            | 1 | 1 |
| [K].dkAQNLyQELLTQEGQASfQGLk.[D] | N-Term(iTRAQ4plex); K2(iTRAQ4 | 1 | 1 |
| [K].vEDIPLAR.[I]                | N-Term(iTRAQ4plex)            | 1 | 1 |
| [K].fVtQAEGAk.[Q]               | N-Term(iTRAQ4plex); K9(iTRAQ4 | 1 | 1 |
| [K].svGFHLPSR.[E]               | N-Term(iTRAQ4plex)            | 1 | 1 |
| [K].hVAEAIck.[E]                | N-Term(iTRAQ4plex); C7(Carbam | 1 | 1 |
| [K].yHWEHTGLTLR.[E]             | N-Term(iTRAQ4plex)            | 1 | 1 |
| [R].sPSQADINk.[I]               | N-Term(iTRAQ4plex); K9(iTRAQ4 | 1 | 1 |
| [R].eSDEETQIk.[V]               | N-Term(iTRAQ4plex); K9(iTRAQ4 | 1 | 1 |
| [R].kGNVATEISTER.[D]            | K1(iTRAQ4plex)                | 1 | 1 |
| [R].kGNVATEISTER.[D]            | N-Term(iTRAQ4plex)            | 1 | 1 |
| [K].svGFHLPSR.[E]               | N-Term(iTRAQ4plex)            | 1 | 1 |
| [K].iAELSATAQEIIk.[S]           | N-Term(iTRAQ4plex); K13(iTRAQ | 1 | 1 |
| [K].fPEVDVLtk.[Y]               | N-Term(iTRAQ4plex); K9(iTRAQ4 | 1 | 1 |
| [K].ISLPDFk.[E]                 | N-Term(iTRAQ4plex); K7(iTRAQ4 | 1 | 1 |
| [K].iAELSATAQEIIk.[S]           | N-Term(iTRAQ4plex); K13(iTRAQ | 1 | 1 |
| [K].sLWDFLk.[L]                 | N-Term(iTRAQ4plex); K7(iTRAQ4 | 1 | 1 |
| [K].eNFAGEATLQR.[I]             | N-Term(iTRAQ4plex)            | 1 | 1 |
| [K].sLHmYANR.[L]                | N-Term(iTRAQ4plex); M4(Oxidat | 1 | 1 |
| [K].fPEVDVLtk.[Y]               | N-Term(iTRAQ4plex); K9(iTRAQ4 | 1 | 1 |
| [K].nMEVSVATTTk.[A]             | N-Term(iTRAQ4plex); K11(iTRAQ | 1 | 1 |
| [R].eSDEETQIk.[V]               | N-Term(iTRAQ4plex); K9(iTRAQ4 | 1 | 1 |
| [K].skEVPEAR.[A]                | N-Term(iTRAQ4plex); K2(iTRAQ4 | 1 | 1 |
| [K].sLHMYANR.[L]                | N-Term(iTRAQ4plex)            | 1 | 1 |
| [R].vSTAFVYtk.[N]               | N-Term(iTRAQ4plex); K9(iTRAQ4 | 1 | 1 |
| [K].iVQILPWEQNEQvk.[N]          | N-Term(iTRAQ4plex); K14(iTRAQ | 1 | 1 |
| [K].ILSGGNTLHLVSTTk.[T]         | N-Term(iTRAQ4plex); K15(iTRAQ | 1 | 1 |
| [R].eELcTMFIR.[E]               | N-Term(iTRAQ4plex); C4(Carbam | 1 | 1 |
| [R].kYTYNYEAESSGVPGTADSR.[S]    | N-Term(iTRAQ4plex); K1(iTRAQ4 | 1 | 1 |
| [K].aHLDIAGSLEGLR.[F]           | N-Term(iTRAQ4plex)            | 1 | 1 |
| [K].HINIDQFVR.[K]               |                               | 1 | 1 |
| [R].eFQVPTFTIPk.[L]             | N-Term(iTRAQ4plex); K11(iTRAQ | 1 | 1 |
| [K].dkDQEVLLQTFLDDASPGDk.[R]    | N-Term(iTRAQ4plex); K2(iTRAQ4 | 1 | 1 |
| [R].kGNVATEISTER.[D]            | N-Term(iTRAQ4plex)            | 1 | 1 |
| [R].kGNVATEISTER.[D]            | K1(iTRAQ4plex)                | 1 | 1 |
| [K].sGSSTASWIQNVDtk.[Y]         | N-Term(iTRAQ4plex); K15(iTRAQ | 1 | 1 |
| [K].iISDYHQQFR.[Y]              | N-Term(iTRAQ4plex)            | 1 | 1 |
| [K].aHLDIAGSLEGLR.[F]           | N-Term(iTRAQ4plex)            | 1 | 1 |
| [R].mYQMIDIQQELQR.[Y]           | N-Term(iTRAQ4plex)            | 1 | 1 |

|                                  |                                |   |   |
|----------------------------------|--------------------------------|---|---|
| [K].qAEAVLk.[T]                  | N-Term(iTRAQ4plex); K7(iTRAQ4  | 1 | 1 |
| [R].hIQNIDIQHLAgk.[L]            | N-Term(iTRAQ4plex); K13(iTRAQ4 | 1 | 1 |
| [R].eSDEETQIk.[V]                | N-Term(iTRAQ4plex); K9(iTRAQ4  | 1 | 1 |
| [K].tSQcTLk.[E]                  | N-Term(iTRAQ4plex); C4(Carbam  | 1 | 1 |
| [R].eELcTMFIR.[E]                | N-Term(iTRAQ4plex); C4(Carbam  | 1 | 1 |
| [K].iEDGTLASk.[T]                | N-Term(iTRAQ4plex); K9(iTRAQ4  | 1 | 1 |
| [R].sPSQADINk.[I]                | N-Term(iTRAQ4plex); K9(iTRAQ4  | 1 | 1 |
| [K].kLQSTTVMNPMk.[L]             | N-Term(iTRAQ4plex); K1(iTRAQ4  | 1 | 1 |
| [K].nmEVSvATTTk.[A]              | N-Term(iTRAQ4plex); M2(Oxidati | 1 | 1 |
| [K].sQAIATk.[K]                  | N-Term(iTRAQ4plex); K7(iTRAQ4  | 1 | 1 |
| [K].sLHmYANR.[L]                 | N-Term(iTRAQ4plex); M4(Oxidati | 1 | 1 |
| [R].iPSVQINfk.[D]                | N-Term(iTRAQ4plex); K9(iTRAQ4  | 1 | 1 |
| [K].tSQcTLk.[E]                  | N-Term(iTRAQ4plex); C4(Carbam  | 1 | 1 |
| [K].iVQILPWEQNEQVk.[N]           | N-Term(iTRAQ4plex); K14(iTRAQ4 | 1 | 1 |
| [K].kLTISEQNIQR.[A]              | N-Term(iTRAQ4plex); K1(iTRAQ4  | 1 | 1 |
| [K].tQFNNEYSQDLDAYNTk.[D]        | N-Term(iTRAQ4plex); K18(iTRAQ4 | 1 | 1 |
| [K].eSQLPTVmDFR.[K]              | N-Term(iTRAQ4plex); M8(Oxidati | 1 | 1 |
| [K].kIISDYHQQFR.[Y]              | N-Term(iTRAQ4plex); K1(iTRAQ4  | 1 | 1 |
| [K].IHVAGNLk.[G]                 | N-Term(iTRAQ4plex); K8(iTRAQ4  | 1 | 1 |
| [R].ITLDIQNk.[K]                 | N-Term(iTRAQ4plex); K8(iTRAQ4  | 1 | 1 |
| [R].kYTYNYEAESSGVPGTADSR.[S]     | N-Term(iTRAQ4plex); K1(iTRAQ4  | 1 | 1 |
| [K].dSYDLHDLk.[I]                | N-Term(iTRAQ4plex); K9(iTRAQ4  | 1 | 1 |
| [K].hINIDQFVR.[K]                | N-Term(iTRAQ4plex)             | 1 | 1 |
| [K].qVFLYPEk.[D]                 | N-Term(iTRAQ4plex); K8(iTRAQ4  | 1 | 1 |
| [R].kYTYNYEAESSGVPGTADSR.[S]     | K1(iTRAQ4plex)                 | 1 | 1 |
| [R].kYTYNYEAESSGVPGTADSR.[S]     | N-Term(iTRAQ4plex)             | 1 | 1 |
| [K].aHLDIAGSLEGHLR.[F]           | N-Term(iTRAQ4plex)             | 1 | 1 |
| [K].mTSNFPVDLSDYpk.[S]           | N-Term(iTRAQ4plex); M1(Oxidati | 1 | 1 |
| [K].dkDQEVLLQTFLLDDASPGDK.[R]    | N-Term(iTRAQ4plex); K2(iTRAQ4  | 1 | 1 |
| [R].sPSQADINk.[I]                | N-Term(iTRAQ4plex); K9(iTRAQ4  | 1 | 1 |
| [K].ISNVLQQVk.[I]                | N-Term(iTRAQ4plex); K9(iTRAQ4  | 1 | 1 |
| [R].vIGNMGQTmEQLTPELk.[S]        | N-Term(iTRAQ4plex); M9(Oxidati | 1 | 1 |
| [K].tSQcTLk.[E]                  | N-Term(iTRAQ4plex); C4(Carbam  | 1 | 1 |
| [R].ITLDIQNk.[K]                 | N-Term(iTRAQ4plex); K8(iTRAQ4  | 1 | 1 |
| [K].nFVASHIANILNSEELDIQDLk.[K]   | N-Term(iTRAQ4plex); K22(iTRAQ4 | 1 | 1 |
| [R].evGTVLSQVYSk.[V]             | N-Term(iTRAQ4plex); K12(iTRAQ4 | 1 | 1 |
| [K].sQAIATk.[K]                  | N-Term(iTRAQ4plex); K7(iTRAQ4  | 1 | 1 |
| [R].QIDDIDVR.[F]                 |                                | 1 | 1 |
| [K].sLHMYANR.[L]                 | N-Term(iTRAQ4plex)             | 1 | 1 |
| [R].IELELRPTGEIEQYSVSATYELQR.[E] | N-Term(iTRAQ4plex)             | 1 | 1 |

| Protein Acc | # Missed Cle | DeltaScore | m/z [Da] | MH+ [Da] | DeltaM [ppm] | Deltam/z [D] | Isolation In |
|-------------|--------------|------------|----------|----------|--------------|--------------|--------------|
| P02042; P6  | 0            | 1          | 424.2276 | 1270.668 | 1.66         | 0.0007       | 6.509261     |
| P02042; P6  | 0            | 0.9136     | 479.9645 | 1437.879 | 0.68         | 0.00033      | 15.47896     |
| P02042; P6  | 0            | 0.883      | 719.4435 | 1437.88  | 1.26         | 0.00091      | 7.142306     |
| P02042; P6  | 0            | 0.825      | 479.9647 | 1437.88  | 1.06         | 0.00051      | 34.55009     |
| P02042; P6  | 0            | 0.9794     | 647.3928 | 1293.778 | 1.79         | 0.00116      | 26.37509     |
| P02042; P6  | 0            | 0.5        | 414.2438 | 1240.717 | 2.42         | 0.001        | 30.8405      |
| P02100; P0  | 0            | 0.9348     | 709.9196 | 1418.832 | 2.96         | 0.0021       | 14.76605     |
| P02100; P0  | 0            | 0.9286     | 709.9183 | 1418.829 | 1.16         | 0.00082      | 31.45067     |
| P02042; P6  | 0            | 0.9892     | 653.3716 | 1958.1   | 2.79         | 0.00182      | 13.43204     |
| P02042; P6  | 0            | 1          | 424.2276 | 1270.668 | 1.8          | 0.00076      | 0            |
| P02042      | 0            | 0.9767     | 416.584  | 1247.737 | 1.84         | 0.00076      | 9.137834     |
| P02042; P6  | 0            | 1          | 635.8383 | 1270.669 | 2.51         | 0.0016       | 11.28336     |
| P02042; P6  | 0            | 1          | 431.931  | 1293.778 | 1.94         | 0.00084      | 37.24517     |
| P02100; P0  | 0            | 1          | 637.8677 | 1274.728 | 1.97         | 0.00125      | 41.66899     |
| P02042      | 0            | 1          | 700.8832 | 1400.759 | -1.66        | -0.00116     | 29.07772     |
| B9A064; P0  | 0            | 1          | 729.7221 | 2187.152 | 4.67         | 0.0034       | 7.072478     |
| B9A064; P0  | 0            | 1          | 678.0274 | 2032.068 | 2.32         | 0.00157      | 15.40447     |
| B9A064; P0  | 0            | 1          | 678.0273 | 2032.067 | 2.23         | 0.00151      | 14.60128     |
| B9A064; P0  | 0            | 1          | 777.7546 | 2331.249 | 2.46         | 0.00191      | 7.245492     |
| B9A064; P0  | 0            | 1          | 777.755  | 2331.25  | 3.01         | 0.00234      | 20.78843     |
| B9A064; P0  | 0            | 0.962      | 667.3279 | 1999.969 | 2.89         | 0.00192      | 11.1451      |
| B9A064; P0  | 0            | 0.9583     | 667.3274 | 1999.968 | 2.15         | 0.00144      | 9.356668     |
| B9A064; P0  | 0            | 1          | 729.7219 | 2187.151 | 4.5          | 0.00328      | 10.86865     |
| B9A064; P0  | 0            | 0.9375     | 729.7202 | 2187.146 | 2.07         | 0.00151      | 0.969161     |
| B9A064; P0  | 0            | 1          | 500.7472 | 1999.967 | 1.75         | 0.00088      | 32.04743     |
| B9A064      | 0            | 0.7949     | 565.3661 | 1129.725 | 5.84         | 0.0033       | 10.01449     |
| B9A064      | 0            | 0.7568     | 565.3661 | 1129.725 | 5.84         | 0.0033       | 0            |
| B9A064      | 0            | 0.8947     | 377.2455 | 1129.722 | 3.26         | 0.00123      | 9.129904     |
| B9A064; P0  | 0            | 1          | 667.3258 | 1999.963 | -0.23        | -0.00015     | 17.3943      |
| B9A064; P0  | 0            | 0.8571     | 678.0297 | 2032.075 | 5.74         | 0.00389      | 0            |
| Q02325; P0  | 0            | 1          | 513.2464 | 1537.725 | 1.77         | 0.00091      | 8.781481     |
| Q02325; P0  | 0            | 1          | 769.3662 | 1537.725 | 2.02         | 0.00155      | 3.467448     |
| Q02325; P0  | 0            | 1          | 513.2459 | 1537.723 | 0.82         | 0.00042      | 28.60907     |
| Q02325; P0  | 0            | 0.9351     | 761.3681 | 1521.729 | 1.26         | 0.00096      | 3.723963     |
| Q02325; P0  | 0            | 0.875      | 507.9149 | 1521.73  | 1.98         | 0.001        | 3.228438     |
| Q02325; P0  | 0            | 0.8372     | 507.9146 | 1521.729 | 1.43         | 0.00073      | 11.80114     |
| Q02325; P0  | 0            | 1          | 513.2466 | 1537.725 | 2.13         | 0.00109      | 6.229238     |
| Q02325; Q1  | 0            | 0.8        | 584.823  | 1168.639 | 2.92         | 0.00171      | 12.57676     |
| Q02325; P0  | 0            | 0.8824     | 689.3164 | 1377.626 | 0.43         | 0.0003       | 0            |
| Q02325; Q1  | 0            | 0.5833     | 390.2174 | 1168.638 | 2.1          | 0.00082      | 27.11907     |
| Q02325; Q1  | 0            | 0.8182     | 584.8233 | 1168.639 | 3.44         | 0.00201      | 7.360862     |
| Q02325; P0  | 0            | 0.9756     | 689.3164 | 1377.625 | 0.34         | 0.00023      | 17.78435     |
| Q02325; P0  | 0            | 1          | 513.2463 | 1537.724 | 1.65         | 0.00085      | 12.06906     |
| Q02325; Q1  | 0            | 0.5833     | 390.2172 | 1168.637 | 1.55         | 0.00061      | 10.91142     |
| Q02325; P0  | 0            | 1          | 513.2466 | 1537.725 | 2.25         | 0.00115      | 59.04612     |
| Q02325; Q1  | 0            | 0.44       | 390.2168 | 1168.636 | 0.38         | 0.00015      | 14.30095     |
| PODJI8      | 0            | 1          | 774.6933 | 2322.065 | -0.1         | -0.00008     | 11.12954     |
| PODJI8      | 0            | 1          | 774.695  | 2322.07  | 2.03         | 0.00157      | 4.701438     |
| PODJI9; P0  | 0            | 0.9733     | 847.921  | 1694.835 | 3.12         | 0.00264      | 12.78635     |
| PODJI8      | 0            | 1          | 774.6944 | 2322.069 | 1.32         | 0.00102      | 0            |
| P35443; P4  | 0            | 0.975      | 675.0043 | 2022.998 | 3.06         | 0.00206      | 4.581845     |

|            |   |        |          |          |       |          |          |
|------------|---|--------|----------|----------|-------|----------|----------|
| P35443; P4 | 0 | 1      | 461.7607 | 1844.021 | 0.61  | 0.00028  | 43.29137 |
| P35443     | 0 | 0.9821 | 708.9905 | 2124.957 | 2.77  | 0.00196  | 3.831197 |
| P35443     | 0 | 0.7097 | 583.9708 | 1749.898 | 6.37  | 0.00372  | 23.27845 |
| P35443; P4 | 0 | 0.8095 | 657.4075 | 1313.808 | 3.48  | 0.00228  | 6.450108 |
| P02771     | 1 | 1      | 383.9939 | 1532.954 | 2.02  | 0.00077  | 0        |
| P02771     | 1 | 1      | 511.6558 | 1532.953 | 1.49  | 0.00076  | 11.12538 |
| P02771     | 1 | 1      | 511.6551 | 1532.951 | 0.18  | 0.00009  | 13.27279 |
| P02771     | 0 | 1      | 459.6222 | 1376.852 | 1.82  | 0.00083  | 30.62461 |
| P36980; QC | 0 | 0.8036 | 492.2609 | 1474.768 | 1.51  | 0.00074  | 4.42155  |
| P36980; QC | 0 | 1      | 540.294  | 1618.867 | -0.26 | -0.00014 | 18.41137 |
| P36980; QC | 0 | 1      | 540.2943 | 1618.868 | 0.2   | 0.00011  | 29.04418 |
| P36980     | 0 | 0.3617 | 512.3002 | 1023.593 | 0.61  | 0.00031  | 3.62429  |
| P36980     | 0 | 1      | 588.6351 | 1763.891 | 1.82  | 0.00107  | 40.7585  |
| Q9UJJ9     | 0 | 1      | 1021.808 | 3063.408 | 3.76  | 0.00384  | 5.008028 |
| Q9UJJ9     | 0 | 0.8182 | 532.8058 | 1064.604 | 2.88  | 0.00153  | 31.97983 |
| P08294     | 0 | 1      | 492.9486 | 1476.831 | 2.19  | 0.00108  | 8.144977 |
| P08294     | 0 | 1      | 540.9828 | 1620.934 | 2.23  | 0.0012   | 14.37619 |
| P08294     | 0 | 1      | 494.6007 | 1481.787 | 3.05  | 0.00151  | 0        |
| P08294     | 0 | 0.8462 | 494.6    | 1481.785 | 1.75  | 0.00087  | 5.127842 |
| P41222     | 0 | 1      | 733.3936 | 2198.166 | 3.55  | 0.0026   | 33.7404  |
| P41222     | 1 | 1      | 447.5964 | 1340.775 | -0.49 | -0.00022 | 47.1739  |
| Q15166     | 0 | 0.8654 | 439.2838 | 1315.837 | 2.05  | 0.0009   | 9.680024 |
| Q15166     | 0 | 0.8333 | 556.3351 | 1111.663 | 2.6   | 0.00144  | 14.96833 |
| Q15166     | 0 | 1      | 391.2498 | 1171.735 | 2.45  | 0.00096  | 43.53766 |
| Q15166     | 0 | 0.6552 | 658.4205 | 1315.834 | -0.16 | -0.00011 | 21.87804 |
| Q15166     | 0 | 1      | 439.2833 | 1315.835 | 0.94  | 0.00041  | 33.67272 |
| P04070     | 0 | 0.9677 | 585.3236 | 1753.956 | 3.06  | 0.00179  | 45.92674 |
| P04070     | 1 | 0.5405 | 630.0246 | 1888.059 | 3.27  | 0.00206  | 20.702   |
| P04070     | 1 | 0.6562 | 630.0234 | 1888.056 | 1.33  | 0.00084  | 10.52519 |
| P04070     | 1 | 0.5429 | 630.0241 | 1888.058 | 2.4   | 0.00151  | 46.83348 |
| P04070     | 0 | 1      | 585.3239 | 1753.957 | 3.58  | 0.0021   | 6.390798 |
| P04070     | 1 | 0.84   | 630.0242 | 1888.058 | 2.69  | 0.00169  | 25.22333 |
| P04070     | 1 | 0.6957 | 630.0237 | 1888.057 | 1.92  | 0.00121  | 18.22969 |
| P04070     | 0 | 0.2105 | 439.2436 | 1753.952 | 0.86  | 0.00038  | 30.03496 |
| P61769     | 0 | 0.9104 | 705.9202 | 1410.833 | 1.66  | 0.00117  | 0        |
| P61769     | 0 | 1      | 479.5921 | 1436.762 | -0.36 | -0.00017 | 32.90707 |
| P61769     | 0 | 0.9636 | 633.8691 | 1266.731 | 1.86  | 0.00118  | 0        |
| P00918     | 0 | 1      | 472.9681 | 1416.89  | -0.05 | -0.00002 | 29.17554 |
| P00918     | 0 | 0.7692 | 638.3926 | 1275.778 | 1.4   | 0.00089  | 0        |
| Q9BXR6; QC | 0 | 1      | 598.6377 | 1793.899 | 0.19  | 0.00011  | 33.30711 |
| Q9BXR6     | 0 | 0.8824 | 542.0378 | 2165.129 | 1.38  | 0.00075  | 12.74582 |
| Q9BXR6     | 0 | 0.8571 | 501.8317 | 1002.656 | 1.2   | 0.0006   | 70.55062 |
| Q76LX8     | 0 | 0.7742 | 427.9241 | 1281.758 | 2.38  | 0.00102  | 15.54964 |
| Q76LX8     | 0 | 1      | 536.3162 | 1606.934 | -3.48 | -0.00186 | 41.31217 |
| P33151     | 0 | 1      | 652.7131 | 1956.125 | 2.98  | 0.00194  | 18.02342 |
| P33151     | 0 | 0.9118 | 522.6035 | 1565.796 | 2.06  | 0.00108  | 20.3293  |
| Q13740     | 0 | 1      | 638.6848 | 1914.04  | 1.76  | 0.00112  | 38.91248 |
| Q13740     | 0 | 1      | 544.2796 | 1630.824 | 2.45  | 0.00133  | 0        |
| P63267; P6 | 0 | 1      | 487.2637 | 1459.777 | 0.94  | 0.00046  | 46.31744 |
| A5A3E0; P6 | 0 | 0.8636 | 645.6713 | 1934.999 | 2.72  | 0.00175  | 55.86254 |
| P08709     | 0 | 0.6364 | 527.9681 | 1581.89  | 1.13  | 0.0006   | 10.08972 |
| P08709     | 0 | 1      | 874.8304 | 2622.477 | 1.16  | 0.00102  | 42.82035 |

|            |   |        |          |          |       |          |          |
|------------|---|--------|----------|----------|-------|----------|----------|
| P00441     | 0 | 0.5    | 505.279  | 1513.822 | 0.7   | 0.00035  | 69.69789 |
| P00441     | 0 | 0.9524 | 573.3288 | 1145.65  | 2.99  | 0.00171  | 12.17622 |
| Q99784     | 0 | 0.7576 | 386.5692 | 1157.693 | 1.76  | 0.00068  | 18.11504 |
| Q99784     | 0 | 0.9655 | 473.2899 | 1417.855 | 3.35  | 0.00159  | 14.13693 |
| A5A3E0; Q9 | 0 | 1      | 554.2729 | 1660.804 | -0.37 | -0.0002  | 38.75434 |
| A5A3E0; Q9 | 0 | 1      | 505.9223 | 1515.752 | 2.11  | 0.00107  | 29.73994 |
| A5A3E0; Q9 | 0 | 1      | 554.2729 | 1660.804 | -0.37 | -0.0002  | 38.75434 |
| A5A3E0; Q9 | 0 | 1      | 505.9223 | 1515.752 | 2.11  | 0.00107  | 29.73994 |
| P11021     | 0 | 0.9608 | 523.8276 | 1046.648 | 3.05  | 0.0016   | 5.012991 |
| P11021     | 0 | 0.5405 | 423.9038 | 1269.697 | 3     | 0.00127  | 0        |
| P02452     | 0 | 0.9    | 877.9328 | 1754.858 | 2.3   | 0.00202  | 8.353262 |
| P02458; P0 | 0 | 0.4286 | 492.2642 | 1474.778 | 4.5   | 0.00221  | 0        |
| P02458; P0 | 0 | 0.7143 | 492.264  | 1474.777 | 4     | 0.00197  | 20.83963 |
| P02458; P0 | 0 | 1      | 492.2633 | 1474.775 | 2.57  | 0.00126  | 48.95316 |
| P05062     | 0 | 0.9615 | 510.6231 | 1529.855 | 1.44  | 0.00073  | 58.29253 |
| P05062     | 0 | 1      | 762.726  | 2286.163 | 0.28  | 0.00021  | 51.26673 |
| P22105; Q1 | 0 | 1      | 584.3294 | 1750.974 | 3.98  | 0.00232  | 6.555482 |
| P22105; Q1 | 0 | 0.6667 | 621.864  | 1242.721 | 2.59  | 0.00161  | 50.187   |
| P06702     | 0 | 0.4167 | 420.5719 | 1259.701 | 1.99  | 0.00084  | 22.3853  |
| P06702     | 1 | 1      | 479.9658 | 1437.883 | 2.76  | 0.00132  | 7.225609 |
| P23470     | 0 | 0.75   | 523.3655 | 1045.724 | 1.29  | 0.00068  | 42.90685 |
| P23470     | 0 | 1      | 481.9292 | 1443.773 | 2.84  | 0.00137  | 5.758438 |
| P13598     | 1 | 0.5909 | 406.2717 | 1216.8   | 1.27  | 0.00051  | 61.84037 |
| P13598     | 0 | 0.8333 | 623.4011 | 1868.189 | 3.4   | 0.00212  | 45.99354 |
| Q9UNN8     | 0 | 1      | 396.5589 | 1187.662 | -0.09 | -0.00003 | 47.25684 |
| Q9UNN8     | 0 | 1      | 484.6039 | 1451.797 | 1.47  | 0.00071  | 5.991768 |
| P05109     | 0 | 0.9773 | 555.814  | 1110.621 | 1.86  | 0.00103  | 5.130662 |
| P05109     | 0 | 0.7027 | 576.3337 | 1151.66  | 1.45  | 0.00084  | 25.93389 |
| Q9Y4L1     | 0 | 0.6296 | 647.8856 | 1294.764 | 2.37  | 0.00153  | 40.0595  |
| Q9Y4L1     | 1 | 1      | 486.2835 | 1456.836 | 1.44  | 0.0007   | 19.7084  |
| POCOL4; P0 | 0 | 0.88   | 814.4339 | 1627.861 | 2.17  | 0.00177  | 11.91346 |
| POCOL4; P0 | 0 | 0.72   | 543.2917 | 1627.861 | 2.17  | 0.00117  | 2.514847 |
| POCOL4; P0 | 0 | 0.9589 | 814.4331 | 1627.859 | 1.2   | 0.00098  | 6.002271 |
| POCOL4; P0 | 0 | 0.7451 | 543.2906 | 1627.857 | 0.14  | 0.00008  | 11.02971 |
| POCOL4; P0 | 0 | 0.9467 | 543.2921 | 1627.862 | 2.84  | 0.00154  | 8.938625 |
| POCOL4; P0 | 0 | 0.1429 | 440.0023 | 1756.987 | 0.38  | 0.00017  | 13.3462  |
| POCOL4; P0 | 1 | 0.8929 | 790.0978 | 2368.279 | 1.16  | 0.00092  | 9.614325 |
| POCOL4; P0 | 0 | 0.8214 | 543.2907 | 1627.857 | 0.25  | 0.00014  | 0        |
| POCOL4; P0 | 0 | 0.9559 | 610.679  | 1830.022 | 0.67  | 0.00041  | 8.518244 |
| POCOL4; P0 | 0 | 0.8901 | 915.5165 | 1830.026 | 2.58  | 0.00236  | 6.086547 |
| POCOL4; P0 | 0 | 0.8864 | 458.2622 | 1830.027 | 3.16  | 0.00145  | 2.335641 |
| POCOL4; P0 | 0 | 1      | 610.6807 | 1830.027 | 3.47  | 0.00212  | 17.67647 |
| POCOL4; P0 | 0 | 1      | 610.6804 | 1830.027 | 3.07  | 0.00187  | 9.608068 |
| POCOL4; P0 | 0 | 1      | 636.3515 | 1271.696 | 3.9   | 0.00248  | 14.22901 |
| POCOL4; P0 | 0 | 0.8824 | 459.9129 | 1377.724 | 1.79  | 0.00082  | 0        |
| POCOL4; P0 | 0 | 0.7368 | 557.8151 | 1114.623 | 1.21  | 0.00068  | 0        |
| POCOL4; P0 | 0 | 0.9608 | 636.3503 | 1271.693 | 1.98  | 0.00126  | 7.495775 |
| POCOL4; P0 | 1 | 0.7333 | 592.8256 | 2368.281 | 1.96  | 0.00116  | 2.025505 |
| POCOL4; P0 | 1 | 0.88   | 790.0981 | 2368.28  | 1.55  | 0.00122  | 4.007072 |
| POCOL4; P0 | 1 | 0.7407 | 592.8265 | 2368.284 | 3.5   | 0.00207  | 65.63628 |
| POCOL4; P0 | 1 | 0.963  | 790.0977 | 2368.279 | 1.09  | 0.00086  | 5.731484 |
| POCOL4; P0 | 1 | 0.9706 | 790.0981 | 2368.28  | 1.63  | 0.00129  | 6.935635 |



|            |   |        |          |          |      |         |          |
|------------|---|--------|----------|----------|------|---------|----------|
| POCOL4; PO | 1 | 1      | 571.8116 | 2284.225 | 7.79 | 0.00445 | 20.25506 |
| POCOL4; PO | 1 | 0.9118 | 762.0757 | 2284.213 | 2.61 | 0.00199 | 0        |
| POCOL4; PO | 0 | 1      | 710.0423 | 2128.112 | 3.17 | 0.00225 | 84.79305 |
| POCOL4; PO | 0 | 0.8197 | 615.872  | 1230.737 | 3.21 | 0.00198 | 13.4027  |
| POCOL4; PO | 0 | 1      | 542.2908 | 1083.574 | 1.49 | 0.00081 | 1.305774 |
| POCOL4; PO | 1 | 0.8049 | 470.6024 | 1409.793 | 3.44 | 0.00162 | 17.80892 |
| POCOL4; PO | 0 | 0.7    | 481.956  | 1443.854 | 4.79 | 0.00231 | 13.23638 |
| POCOL4; PO | 0 | 0.7015 | 662.3807 | 1323.754 | 2.28 | 0.00151 | 3.729706 |
| POCOL4; PO | 0 | 0.6579 | 524.311  | 1570.918 | 1.83 | 0.00096 | 6.544328 |
| POCOL4; PO | 1 | 0.9074 | 490.2613 | 1468.769 | 1.87 | 0.00091 | 25.50551 |
| POCOL4; PO | 1 | 0.9074 | 490.2613 | 1468.769 | 1.87 | 0.00091 | 25.50551 |
| POCOL4; PO | 1 | 1      | 490.2612 | 1468.769 | 1.8  | 0.00088 | 2.070895 |
| POCOL4; PO | 1 | 1      | 490.2612 | 1468.769 | 1.8  | 0.00088 | 2.070895 |
| POCOL4; PO | 0 | 1      | 904.4314 | 2711.28  | 2.11 | 0.00191 | 1.925776 |
| POCOL4; PO | 0 | 0.8333 | 399.5598 | 1196.665 | 2.57 | 0.00103 | 10.67162 |
| POCOL4; PO | 0 | 0.697  | 481.9547 | 1443.85  | 2.13 | 0.00102 | 11.48204 |
| POCOL4; PO | 0 | 1      | 899.0993 | 2695.283 | 1.62 | 0.00145 | 1.309225 |
| POCOL4; PO | 0 | 1      | 899.0989 | 2695.282 | 1.21 | 0.00108 | 2.199146 |
| POCOL4; PO | 0 | 1      | 851.0645 | 2551.179 | 0.73 | 0.00062 | 0        |
| POCOL4; PO | 0 | 0.9524 | 862.9702 | 1724.933 | 1.32 | 0.00114 | 7.43602  |
| POCOL4; PO | 0 | 0.9444 | 575.6502 | 1724.936 | 2.9  | 0.00167 | 28.3975  |
| POCOL4; PO | 0 | 0.9298 | 575.65   | 1724.936 | 2.69 | 0.00155 | 8.106833 |
| POCOL4; PO | 0 | 0.962  | 862.971  | 1724.935 | 2.24 | 0.00193 | 1.706079 |
| POCOL4; PO | 0 | 0.9268 | 575.6498 | 1724.935 | 2.37 | 0.00136 | 11.78024 |
| POCOL4; PO | 0 | 0.8571 | 862.9707 | 1724.934 | 1.89 | 0.00163 | 10.14675 |
| POCOL4; PO | 0 | 0.9815 | 575.6504 | 1724.937 | 3.33 | 0.00191 | 8.231376 |
| POCOL4; PO | 0 | 0.8571 | 590.9779 | 1770.919 | 2.76 | 0.00163 | 31.60502 |
| POCOL4; PO | 0 | 0.9104 | 590.9768 | 1770.916 | 0.8  | 0.00047 | 3.83896  |
| POCOL4; PO | 0 | 0.8462 | 885.9625 | 1770.918 | 1.91 | 0.00169 | 3.769225 |
| POCOL4; PO | 0 | 0.92   | 590.9765 | 1770.915 | 0.38 | 0.00023 | 4.631679 |
| POCOL4; PO | 0 | 0.5714 | 468.5796 | 1403.724 | 0.71 | 0.00033 | 27.22315 |
| POCOL4; PO | 0 | 0.987  | 702.3669 | 1403.726 | 2.39 | 0.00168 | 6.447455 |
| POCOL4; PO | 0 | 0.9189 | 459.9125 | 1377.723 | 0.72 | 0.00033 | 9.700747 |
| POCOL4; PO | 0 | 0.7647 | 599.3157 | 1197.624 | 0.75 | 0.00045 | 4.685958 |
| POCOL4; PO | 0 | 0.9167 | 459.9125 | 1377.723 | 0.72 | 0.00033 | 3.849536 |
| POCOL4; PO | 0 | 0.8649 | 459.9129 | 1377.724 | 1.79 | 0.00082 | 3.418623 |
| POCOL4; PO | 1 | 1      | 490.2617 | 1468.771 | 2.74 | 0.00134 | 68.65987 |
| POCOL4; PO | 0 | 0.9831 | 458.9499 | 1374.835 | 0.21 | 0.0001  | 8.918069 |
| POCOL4; PO | 0 | 0.7882 | 687.9224 | 1374.838 | 2.07 | 0.00142 | 6.157514 |
| POCOL4; PO | 1 | 1      | 490.2617 | 1468.771 | 2.74 | 0.00134 | 68.65987 |
| POCOL4; PO | 0 | 1      | 458.9507 | 1374.838 | 2.14 | 0.00098 | 8.437518 |
| POCOL4; PO | 0 | 0.9808 | 662.0079 | 1984.009 | 2.79 | 0.00184 | 19.66835 |
| POCOL4; PO | 0 | 1      | 572.7972 | 2288.167 | 2.69 | 0.00154 | 16.94717 |
| POCOL4; PO | 0 | 0.8723 | 722.4288 | 1443.85  | 2.62 | 0.00189 | 8.394596 |
| POCOL4; PO | 0 | 1      | 481.955  | 1443.85  | 2.64 | 0.00127 | 18.88451 |
| POCOL4; PO | 0 | 0.8706 | 790.413  | 2369.224 | 1.66 | 0.00131 | 7.247535 |
| POCOL4; PO | 1 | 1      | 538.2988 | 1612.882 | 8.3  | 0.00446 | 28.51182 |
| POCOL4; PO | 0 | 0.6596 | 576.7955 | 2304.16  | 2.01 | 0.00116 | 5.662117 |
| POCOL4; PO | 1 | 1      | 571.8084 | 2284.212 | 2.23 | 0.00128 | 2.234328 |
| POCOL4; PO | 1 | 1      | 762.0748 | 2284.21  | 1.33 | 0.00101 | 2.679379 |
| POCOL4; PO | 1 | 1      | 571.808  | 2284.21  | 1.59 | 0.00091 | 2.213109 |
| POCOL4; PO | 1 | 1      | 762.075  | 2284.21  | 1.65 | 0.00126 | 2.43145  |

|            |   |        |          |          |       |          |          |
|------------|---|--------|----------|----------|-------|----------|----------|
| POCOL4; PO | 0 | 1      | 634.368  | 1901.09  | 0.45  | 0.00029  | 7.470258 |
| POCOL4; PO | 0 | 1      | 476.0281 | 1901.091 | 0.99  | 0.00047  | 7.908507 |
| POCOL4; PO | 1 | 0.9792 | 762.0773 | 2284.217 | 4.7   | 0.00358  | 0        |
| POCOL4; PO | 1 | 1      | 571.8112 | 2284.223 | 7.04  | 0.00402  | 14.00352 |
| POCOL4; PO | 0 | 0.8525 | 409.8971 | 1227.677 | 1.47  | 0.0006   | 10.92853 |
| POCOL4; PO | 0 | 0.8636 | 614.3425 | 1227.678 | 2.4   | 0.00147  | 3.654341 |
| POCOL4; PO | 0 | 0.8621 | 409.8967 | 1227.676 | 0.65  | 0.00027  | 5.003325 |
| POCOL4; PO | 0 | 1      | 1126.59  | 2252.174 | 2.53  | 0.00285  | 1.71125  |
| POCOL4; PO | 0 | 1      | 751.3956 | 2252.172 | 1.88  | 0.00141  | 2.23579  |
| POCOL4; PO | 0 | 1      | 1215.597 | 3644.776 | 1.73  | 0.0021   | 0        |
| POCOL4; PO | 0 | 1      | 911.949  | 3644.774 | 1.14  | 0.00104  | 0.705887 |
| POCOL4; PO | 0 | 0.7143 | 399.5596 | 1196.664 | 2.19  | 0.00087  | 8.869975 |
| POCOL4; PO | 0 | 0.5517 | 524.3106 | 1570.917 | 1.13  | 0.00059  | 53.46223 |
| POCOL4; PO | 0 | 0.9231 | 698.9091 | 1396.811 | 2.23  | 0.00156  | 6.511384 |
| POCOL4; PO | 0 | 0.9855 | 617.0257 | 1849.063 | 2.77  | 0.00171  | 25.65826 |
| POCOL4; PO | 0 | 1      | 617.0252 | 1849.061 | 1.88  | 0.00116  | 47.37478 |
| POCOL4; PO | 0 | 0.94   | 733.3654 | 2198.082 | -1.93 | -0.00141 | 65.47301 |
| POCOL4; PO | 0 | 1      | 695.02   | 2083.046 | 1.08  | 0.00075  | 0        |
| POCOL4; PO | 0 | 1      | 617.025  | 1849.06  | 1.58  | 0.00097  | 19.06164 |
| POCOL4; PO | 0 | 1      | 617.0253 | 1849.061 | 2.08  | 0.00128  | 6.541273 |
| POCOL4; PO | 0 | 1      | 706.8581 | 2824.411 | 1.52  | 0.00107  | 3.352633 |
| POCOL4; PO | 0 | 1      | 763.3923 | 2288.162 | 0.74  | 0.00057  | 4.858709 |
| POCOL4; PO | 0 | 1      | 572.7972 | 2288.167 | 2.69  | 0.00154  | 3.311056 |
| POCOL4; PO | 0 | 1      | 763.3929 | 2288.164 | 1.46  | 0.00112  | 3.275803 |
| POCOL4; PO | 0 | 1      | 572.7966 | 2288.165 | 1.73  | 0.00099  | 1.890797 |
| POCOL4; PO | 0 | 1      | 942.143  | 2824.414 | 2.91  | 0.00274  | 1.905259 |
| POCOL4; PO | 0 | 1      | 942.1425 | 2824.413 | 2.32  | 0.00219  | 2.277306 |
| POCOL4; PO | 0 | 1      | 572.7976 | 2288.168 | 3.33  | 0.0019   | 3.885201 |
| POCOL4; PO | 0 | 1      | 706.8582 | 2824.411 | 1.6   | 0.00113  | 2.626854 |
| POCOL4; PO | 1 | 0.9091 | 418.0074 | 1669.008 | 1.63  | 0.00068  | 17.1066  |
| POCOL4; PO | 0 | 1      | 572.7955 | 2288.16  | -0.3  | -0.00017 | 0        |
| POCOL4; PO | 1 | 1      | 557.0079 | 1669.009 | 2.51  | 0.0014   | 10.70534 |
| POCOL4; PO | 0 | 1      | 710.0408 | 2128.108 | 1.02  | 0.00072  | 1.937721 |
| POCOL4; PO | 1 | 0.8864 | 418.006  | 1669.002 | -1.66 | -0.00069 | 8.256634 |
| POCOL4; PO | 1 | 0.9737 | 557.0076 | 1669.008 | 2.07  | 0.00115  | 13.86559 |
| POCOL4; PO | 0 | 1      | 532.7825 | 2128.108 | 1.15  | 0.00061  | 25.97721 |
| POCOL4; PO | 0 | 0.9375 | 710.0416 | 2128.11  | 2.22  | 0.00158  | 12.2241  |
| POCOL4; PO | 0 | 0.8421 | 679.3927 | 1357.778 | 2.88  | 0.00195  | 12.50909 |
| POCOL4; PO | 0 | 0.5957 | 453.2638 | 1357.777 | 1.99  | 0.0009   | 14.11089 |
| POCOL4; PO | 0 | 0.86   | 629.8673 | 1258.727 | 2.91  | 0.00183  | 22.45838 |
| POCOL4; PO | 0 | 0.8197 | 453.2637 | 1357.777 | 1.72  | 0.00078  | 6.476308 |
| POCOL4; PO | 0 | 0.9286 | 679.392  | 1357.777 | 1.89  | 0.00128  | 4.755651 |
| POCOL4; PO | 1 | 0.9787 | 557.0079 | 1669.009 | 2.51  | 0.0014   | 11.11647 |
| POCOL4; PO | 0 | 1      | 710.0415 | 2128.11  | 2.05  | 0.00145  | 0        |
| POCOL4; PO | 0 | 1      | 706.8581 | 2824.411 | 1.52  | 0.00107  | 1.25589  |
| POCOL4; PO | 0 | 0.9821 | 463.0205 | 1849.06  | 1.44  | 0.00067  | 8.049833 |
| POCOL4; PO | 0 | 0.8714 | 925.0349 | 1849.062 | 2.71  | 0.00251  | 5.728807 |
| POCOL4; PO | 0 | 0.9275 | 617.0245 | 1849.059 | 0.89  | 0.00055  | 9.125571 |
| POCOL4; PO | 0 | 1      | 463.0206 | 1849.061 | 1.77  | 0.00082  | 10.18817 |
| POCOL4; PO | 0 | 1      | 925.0341 | 1849.061 | 1.85  | 0.00171  | 0        |
| POCOL4; PO | 0 | 1      | 617.025  | 1849.06  | 1.58  | 0.00097  | 7.924266 |
| POCOL4; PO | 0 | 0.902  | 617.0258 | 1849.063 | 2.97  | 0.00183  | 39.13517 |

|            |   |        |          |          |       |          |          |
|------------|---|--------|----------|----------|-------|----------|----------|
| POCOL4; PO | 0 | 0.8367 | 568.9914 | 1704.96  | 2.51  | 0.00143  | 6.909508 |
| POCOL4; PO | 0 | 0.3689 | 1063.531 | 3188.578 | 1.4   | 0.00148  | 3.788276 |
| POCOL4; PO | 0 | 0.3882 | 797.8998 | 3188.577 | 1.03  | 0.00082  | 3.799753 |
| POCOL5     | 0 | 1      | 797.3952 | 1593.783 | 1.24  | 0.00099  | 1.954859 |
| POCOL4; PO | 0 | 1      | 710.0415 | 2128.11  | 2.05  | 0.00145  | 1.810176 |
| POCOL4; PO | 0 | 0.7188 | 399.5593 | 1196.663 | 1.5   | 0.0006   | 23.17154 |
| POCOL5     | 0 | 0.8298 | 531.9325 | 1593.783 | 1.12  | 0.00059  | 44.23657 |
| POCOL4; PO | 0 | 1      | 670.8411 | 1340.675 | 2.57  | 0.00172  | 4.709168 |
| POCOL4; PO | 0 | 0.8298 | 629.8673 | 1258.727 | 3     | 0.00189  | 8.2719   |
| POCOL4; PO | 0 | 0.8958 | 629.8668 | 1258.726 | 2.23  | 0.0014   | 32.32337 |
| POCOL4; PO | 0 | 1      | 911.9504 | 3644.78  | 2.74  | 0.0025   | 5.921183 |
| POCOL4; PO | 0 | 1      | 1215.599 | 3644.782 | 3.43  | 0.00417  | 0        |
| POCOL4; PO | 0 | 0.9912 | 876.4736 | 2627.406 | 2.03  | 0.00178  | 2.412186 |
| POCOL4; PO | 0 | 1      | 974.8275 | 2922.468 | 2.69  | 0.00262  | 0        |
| POCOL4; PO | 0 | 1      | 926.7924 | 2778.363 | 1.6   | 0.00148  | 26.17738 |
| POCOL4; PO | 0 | 1      | 1068.863 | 3204.576 | 2.1   | 0.00224  | 6.34409  |
| POCOL4; PO | 0 | 1      | 733.3691 | 2198.093 | 3.24  | 0.00237  | 42.34372 |
| POCOL4; PO | 0 | 1      | 1242.156 | 2483.305 | 2.4   | 0.00298  | 0        |
| POCOL4; PO | 0 | 1      | 1314.207 | 2627.406 | 1.99  | 0.00261  | 0        |
| POCOL4; PO | 0 | 0.9184 | 685.3339 | 2053.987 | 1.72  | 0.00117  | 2.506288 |
| POCOL4; PO | 1 | 1      | 538.2955 | 1612.872 | 2.05  | 0.0011   | 19.50909 |
| POCOL4; PO | 1 | 1      | 538.2947 | 1612.87  | 0.69  | 0.00037  | 38.42788 |
| POCOL4; PO | 0 | 0.8095 | 409.8974 | 1227.678 | 2.29  | 0.00094  | 12.2222  |
| POCOL4; PO | 0 | 0.7937 | 554.836  | 1108.665 | 3.85  | 0.00213  | 9.636339 |
| POCOL4; PO | 1 | 0.9773 | 538.295  | 1612.871 | 1.26  | 0.00068  | 15.72817 |
| POCOL4; PO | 1 | 0.9898 | 538.2946 | 1612.869 | 0.46  | 0.00025  | 8.549582 |
| POCOL4; PO | 1 | 1      | 538.2954 | 1612.872 | 1.94  | 0.00104  | 9.702331 |
| POCOL4; PO | 0 | 0.8    | 560.2935 | 1119.58  | 3.15  | 0.00177  | 11.31302 |
| POCOL4; PO | 0 | 0.9333 | 610.6798 | 1830.025 | 1.97  | 0.0012   | 44.52637 |
| POCOL4; PO | 1 | 0.9677 | 563.6411 | 1688.909 | 1.81  | 0.00102  | 4.968037 |
| POCOL4; PO | 0 | 1      | 1209.052 | 2417.098 | -0.21 | -0.00025 | 0        |
| POCOL4; PO | 0 | 1      | 806.3714 | 2417.1   | 0.59  | 0.00048  | 3.273516 |
| POCOL5     | 0 | 0.9059 | 526.6008 | 1577.788 | 1.08  | 0.00057  | 5.473201 |
| POCOL5     | 0 | 0.9451 | 789.3973 | 1577.787 | 0.66  | 0.00052  | 2.945702 |
| POCOL4; PO | 0 | 1      | 733.3657 | 2198.083 | -1.43 | -0.00105 | 36.81449 |
| POCOL4; PO | 0 | 1      | 733.3678 | 2198.089 | 1.4   | 0.00103  | 14.15553 |
| POCOL4; PO | 0 | 0.9783 | 733.3682 | 2198.09  | 1.9   | 0.00139  | 11.64252 |
| POCOL4; PO | 0 | 1      | 733.3679 | 2198.089 | 1.49  | 0.00109  | 8.001216 |
| POCOL4; PO | 0 | 1      | 629.9674 | 1887.888 | 1.43  | 0.0009   | 4.39021  |
| POCOL4; PO | 0 | 0.9048 | 944.447  | 1887.887 | 0.89  | 0.00084  | 3.799334 |
| POCOL4; PO | 0 | 0.9672 | 629.9689 | 1887.892 | 3.86  | 0.00243  | 21.66053 |
| POCOL4; PO | 0 | 1      | 723.0315 | 2167.08  | 1.69  | 0.00122  | 1.818813 |
| POCOL5     | 1 | 1      | 749.9358 | 2996.721 | 2.61  | 0.00196  | 23.85591 |
| POCOL4; PO | 0 | 0.7586 | 669.8612 | 1338.715 | 0.5   | 0.00034  | 6.654665 |
| POCOL4; PO | 0 | 0.9747 | 854.4799 | 1707.952 | 0.85  | 0.00072  | 3.551121 |
| POCOL4; PO | 0 | 1      | 569.9898 | 1707.955 | 2.16  | 0.00123  | 5.385142 |
| POCOL4; PO | 0 | 0.9722 | 568.9744 | 1704.909 | 2.28  | 0.00129  | 5.693548 |
| POCOL4; PO | 0 | 1      | 568.9751 | 1704.911 | 3.56  | 0.00203  | 9.272164 |
| POCOL4; PO | 0 | 0.9672 | 852.9576 | 1704.908 | 1.96  | 0.00167  | 6.551302 |
| POCOL4; PO | 0 | 1      | 568.9751 | 1704.911 | 3.56  | 0.00203  | 13.15989 |
| POCOL4; PO | 0 | 1      | 782.4294 | 1563.851 | 1.63  | 0.00128  | 0        |
| POCOL4; PO | 0 | 0.9474 | 568.9741 | 1704.908 | 1.85  | 0.00105  | 3.56933  |

|            |   |        |          |          |      |         |          |
|------------|---|--------|----------|----------|------|---------|----------|
| POCOL4; PO | 0 | 0.9184 | 852.9573 | 1704.907 | 1.53 | 0.00131 | 6.473444 |
| POCOL4; PO | 0 | 0.9362 | 780.9066 | 1560.806 | 2.07 | 0.00162 | 7.603855 |
| POCOL4; PO | 0 | 1      | 568.9749 | 1704.91  | 3.14 | 0.00178 | 9.686429 |
| POCOL4; PO | 0 | 0.9762 | 568.975  | 1704.911 | 3.46 | 0.00196 | 10.09111 |
| POCOL4; PO | 0 | 1      | 816.5032 | 1631.999 | 1    | 0.00082 | 10.48337 |
| POCOL4; PO | 0 | 0.9677 | 790.4136 | 2369.226 | 2.43 | 0.00192 | 6.811904 |
| POCOL4; PO | 0 | 1      | 481.9554 | 1443.852 | 3.52 | 0.0017  | 0        |
| POCOL4; PO | 0 | 0.7714 | 737.9129 | 1474.819 | 1.17 | 0.00086 | 4.098854 |
| POCOL4; PO | 0 | 0.9333 | 492.2779 | 1474.819 | 1.57 | 0.00077 | 5.518109 |
| POCOL4; PO | 0 | 0.9157 | 542.9428 | 1626.814 | 1.02 | 0.00056 | 0.859662 |
| POCOL4; PO | 0 | 1      | 763.4246 | 2288.259 | 1.75 | 0.00134 | 30.67124 |
| POCOL4; PO | 1 | 0.9677 | 621.8533 | 2484.391 | 2.4  | 0.00149 | 4.806307 |
| POCOL4; PO | 0 | 1      | 592.3666 | 1775.085 | 2.33 | 0.00138 | 3.065492 |
| POCOL4; PO | 0 | 1      | 791.7968 | 2373.376 | 0.63 | 0.0005  | 7.553562 |
| POCOL4; PO | 0 | 0.875  | 594.0998 | 2373.377 | 1.24 | 0.00074 | 27.68506 |
| POCOL5     | 0 | 0.9796 | 649.1345 | 3241.644 | 2.37 | 0.00154 | 10.06449 |
| POCOL4; PO | 0 | 0.7143 | 474.583  | 1421.734 | 3.31 | 0.00157 | 25.12729 |
| POCOL4; PO | 0 | 0.988  | 711.371  | 1421.735 | 3.6  | 0.00256 | 7.464592 |
| POCOL4; PO | 0 | 0.9434 | 474.5831 | 1421.735 | 3.5  | 0.00166 | 9.031528 |
| POCOL5     | 0 | 1      | 811.1661 | 3241.642 | 2.06 | 0.00167 | 3.946628 |
| POCOL4; PO | 0 | 1      | 619.5472 | 3093.707 | 1.91 | 0.00118 | 20.76154 |
| POCOL4; PO | 0 | 0.9189 | 442.9264 | 1326.765 | 1.94 | 0.00086 | 9.391974 |
| POCOL4; PO | 0 | 0.9737 | 569.9888 | 1707.952 | 0.45 | 0.00025 | 31.71992 |
| POCOL4; PO | 0 | 0.8736 | 663.8861 | 1326.765 | 2.25 | 0.00149 | 5.722034 |
| POCOL4; PO | 0 | 0.625  | 442.9256 | 1326.762 | 0.28 | 0.00012 | 9.223516 |
| POCOL4; PO | 0 | 1      | 774.1818 | 3093.705 | 1.4  | 0.00108 | 3.361939 |
| POCOL4; PO | 0 | 0.8333 | 442.9268 | 1326.766 | 2.83 | 0.00125 | 22.21581 |
| POCOL4; PO | 0 | 0.7561 | 442.9264 | 1326.765 | 2.01 | 0.00089 | 0        |
| POCOL4; PO | 0 | 0.8197 | 492.2781 | 1474.82  | 1.88 | 0.00092 | 42.95472 |
| POCOL4; PO | 0 | 0.8627 | 641.3524 | 1281.698 | 3.65 | 0.00234 | 12.25893 |
| POCOL4; PO | 0 | 1      | 639.3195 | 1277.632 | 3.15 | 0.00201 | 5.319107 |
| POCOL4; PO | 0 | 0.8889 | 562.6464 | 1685.925 | 3.27 | 0.00184 | 32.79515 |
| POCOL4; PO | 0 | 1      | 598.7885 | 1196.57  | 2.7  | 0.00162 | 4.36656  |
| POCOL4; PO | 0 | 1      | 598.7878 | 1196.568 | 1.68 | 0.00101 | 3.423467 |
| POCOL4; PO | 0 | 1      | 744.4514 | 1487.895 | 0.04 | 0.00003 | 14.81127 |
| POCOL4; PO | 0 | 1      | 644.3508 | 2574.381 | 0.99 | 0.00064 | 0.879733 |
| POCOL4; PO | 0 | 1      | 598.7885 | 1196.57  | 2.7  | 0.00162 | 3.088728 |
| POCOL4; PO | 0 | 1      | 598.7882 | 1196.569 | 2.3  | 0.00137 | 3.379773 |
| POCOL4; PO | 0 | 1      | 516.6178 | 1547.839 | 3.04 | 0.00157 | 8.099505 |
| POCOL4; PO | 1 | 0.8889 | 518.6359 | 1553.893 | 2.02 | 0.00105 | 11.67609 |
| POCOL4; PO | 1 | 0.92   | 518.6356 | 1553.892 | 1.55 | 0.0008  | 20.36515 |
| POCOL4; PO | 0 | 0.8654 | 641.3528 | 1281.698 | 4.22 | 0.00271 | 36.5496  |
| POCOL4; PO | 0 | 1      | 598.7875 | 1196.568 | 1.07 | 0.00064 | 3.110818 |
| POCOL4; PO | 0 | 1      | 598.789  | 1196.571 | 3.62 | 0.00217 | 0        |
| POCOL4; PO | 0 | 1      | 598.7886 | 1196.57  | 3.01 | 0.0018  | 3.209586 |
| POCOL4; PO | 0 | 1      | 598.7885 | 1196.57  | 2.7  | 0.00162 | 3.526876 |
| POCOL4; PO | 0 | 0.9508 | 636.3505 | 1271.694 | 2.27 | 0.00144 | 100      |
| POCOL4; PO | 0 | 1      | 919.8451 | 2757.521 | 1.91 | 0.00175 | 5.724564 |
| POCOL4; PO | 0 | 0.9091 | 581.1309 | 2901.626 | 2.74 | 0.00159 | 4.158038 |
| POCOL4; PO | 0 | 1      | 680.3757 | 2718.481 | 0.04 | 0.00002 | 2.192481 |
| POCOL4; PO | 0 | 1      | 544.5027 | 2718.484 | 1.31 | 0.00071 | 3.460773 |
| POCOL4; PO | 0 | 1      | 680.3768 | 2718.485 | 1.65 | 0.00112 | 2.076645 |

|            |   |        |          |          |      |         |          |
|------------|---|--------|----------|----------|------|---------|----------|
| POCOL4; PO | 0 | 1      | 1029.58  | 3086.725 | 2.5  | 0.00258 | 3.345291 |
| POCOL4; PO | 0 | 1      | 772.4356 | 3086.721 | 1.21 | 0.00094 | 5.352506 |
| POCOL4; PO | 0 | 0.9778 | 568.975  | 1704.911 | 3.46 | 0.00196 | 8.411469 |
| POCOL4; PO | 0 | 1      | 865.6581 | 4324.262 | 2.09 | 0.00181 | 2.478431 |
| POCOL4; PO | 0 | 1      | 568.975  | 1704.911 | 3.46 | 0.00196 | 11.15509 |
| POCOL4; PO | 0 | 0.975  | 568.9753 | 1704.911 | 3.99 | 0.00227 | 10.76766 |
| POCOL4; PO | 0 | 0.9574 | 568.9755 | 1704.912 | 4.32 | 0.00245 | 12.43042 |
| POCOL4; PO | 0 | 1      | 1081.82  | 4324.259 | 1.58 | 0.00171 | 2.319621 |
| POCOL4; PO | 0 | 1      | 568.975  | 1704.91  | 3.35 | 0.0019  | 8.388101 |
| POCOL4; PO | 0 | 1      | 568.975  | 1704.91  | 3.35 | 0.0019  | 7.974552 |
| POCOL4; PO | 0 | 0.7067 | 610.3615 | 1219.716 | 1.65 | 0.00101 | 18.36178 |
| POCOL4; PO | 0 | 0.7015 | 662.3806 | 1323.754 | 2.18 | 0.00145 | 5.777752 |
| POCOL4; PO | 0 | 1      | 974.8261 | 2922.464 | 1.18 | 0.00115 | 2.592923 |
| POCOL4; PO | 0 | 0.9846 | 1136.634 | 2272.262 | 0.5  | 0.00057 | 0        |
| POCOL4; PO | 0 | 1      | 763.3895 | 1525.772 | 0.61 | 0.00047 | 8.361775 |
| POCOL4; PO | 0 | 0.8571 | 691.3391 | 1381.671 | 1.48 | 0.00102 | 0        |
| POCOL4; PO | 0 | 0.9121 | 758.0922 | 2272.262 | 0.68 | 0.00052 | 3.574229 |
| POCOL5     | 0 | 0.7632 | 531.9326 | 1593.783 | 1.23 | 0.00065 | 39.5839  |
| POCOL4; PO | 1 | 0.697  | 470.6018 | 1409.791 | 2.15 | 0.00101 | 16.73803 |
| POCOL4; PO | 0 | 0.9931 | 1314.205 | 2627.403 | 0.96 | 0.00127 | 0        |
| POCOL4; PO | 0 | 1      | 729.1823 | 2913.707 | 0.96 | 0.0007  | 7.451555 |
| POCOL4; PO | 0 | 1      | 971.9078 | 2913.709 | 1.43 | 0.00139 | 3.05197  |
| POCOL4; PO | 0 | 1      | 592.3665 | 1775.085 | 2.02 | 0.0012  | 2.265197 |
| POCOL4; PO | 1 | 0.9048 | 420.9138 | 1260.727 | 0.52 | 0.00022 | 17.07265 |
| POCOL4; PO | 0 | 0.76   | 399.5595 | 1196.664 | 1.81 | 0.00072 | 67.22067 |
| POCOL4; PO | 0 | 0.7143 | 468.5802 | 1403.726 | 2.14 | 0.001   | 12.54043 |
| POCOL4; PO | 0 | 1      | 487.287  | 1459.846 | 3.35 | 0.00163 | 14.59365 |
| POCOL4; PO | 0 | 0.1515 | 433.9207 | 1299.748 | 2.28 | 0.00099 | 19.51768 |
| POCOL4; PO | 0 | 0.8611 | 852.9576 | 1704.908 | 1.96 | 0.00167 | 3.193368 |
| POCOL4; PO | 0 | 0.95   | 463.0204 | 1849.06  | 1.18 | 0.00054 | 18.91823 |
| POCOL4; PO | 0 | 1      | 598.788  | 1196.569 | 1.89 | 0.00113 | 3.521297 |
| POCOL4; PO | 0 | 0.75   | 399.5589 | 1196.662 | 0.43 | 0.00017 | 6.72325  |
| POCOL5     | 0 | 0.8485 | 1033.185 | 3097.54  | 2.1  | 0.00217 | 1.242798 |
| POCOL4; PO | 0 | 0.3429 | 885.9619 | 1770.917 | 1.29 | 0.00114 | 6.470485 |
| POCOL4; PO | 0 | 0.8367 | 629.3591 | 1257.711 | 2.27 | 0.00143 | 10.64508 |
| POCOL4; PO | 0 | 1      | 544.5025 | 2718.483 | 0.97 | 0.00053 | 29.77047 |
| POCOL4; PO | 0 | 0.6286 | 463.0205 | 1849.06  | 1.51 | 0.0007  | 4.319591 |
| POCOL4; PO | 0 | 1      | 399.5279 | 1196.569 | 2.29 | 0.00091 | 48.74908 |
| POCOL4; PO | 0 | 0.6579 | 520.9397 | 1560.805 | 1.24 | 0.00065 | 3.713353 |
| POCOL4; PO | 0 | 0.7436 | 468.5805 | 1403.727 | 2.79 | 0.00131 | 33.81586 |
| POCOL4; PO | 0 | 0.8    | 441.9229 | 1323.754 | 2.36 | 0.00104 | 14.17325 |
| POCOL4; PO | 0 | 0.8421 | 669.8644 | 1338.722 | 5.43 | 0.00363 | 17.00924 |
| POCOL4; PO | 0 | 0.75   | 520.9398 | 1560.805 | 1.36 | 0.00071 | 4.419956 |
| POCOL4; PO | 0 | 0.8182 | 409.8979 | 1227.679 | 3.48 | 0.00142 | 32.31134 |
| POCOL4; PO | 0 | 1      | 899.1001 | 2695.286 | 2.5  | 0.00224 | 4.423165 |
| POCOL4; PO | 0 | 0.9444 | 636.3513 | 1271.695 | 3.61 | 0.0023  | 100      |
| POCOL4; PO | 0 | 0.9268 | 852.9576 | 1704.908 | 1.96 | 0.00167 | 6.797606 |
| POCOL4; PO | 0 | 1      | 568.974  | 1704.907 | 1.63 | 0.00093 | 24.27141 |
| POCOL4; PO | 1 | 1      | 421.0057 | 1681.001 | 0.65 | 0.00027 | 15.98904 |
| POCOL4; PO | 0 | 1      | 542.2906 | 1083.574 | 1.04 | 0.00056 | 0        |
| POCOL4; PO | 0 | 0.9535 | 602.325  | 1203.643 | 2.68 | 0.00161 | 4.264612 |
| POCOL4; PO | 0 | 0.8667 | 662.0068 | 1984.006 | 1.22 | 0.00081 | 0        |

|            |   |        |          |          |       |          |          |
|------------|---|--------|----------|----------|-------|----------|----------|
| POCOL4; PO | 0 | 0.9714 | 569.99   | 1707.955 | 2.59  | 0.00147  | 14.00191 |
| POCOL4; PO | 1 | 1      | 538.2952 | 1612.871 | 1.6   | 0.00086  | 41.40491 |
| POCOL4; PO | 0 | 1      | 689.3657 | 1377.724 | 1.73  | 0.00119  | 2.458498 |
| POCOL4; PO | 0 | 0.9375 | 662.006  | 1984.004 | 0.02  | 0.00001  | 83.18974 |
| POCOL4; PO | 0 | 1      | 399.8803 | 1197.626 | 2.59  | 0.00104  | 7.288148 |
| POCOL4; PO | 0 | 1      | 626.8574 | 1252.708 | 1.42  | 0.00089  | 4.032603 |
| POCOL4; PO | 1 | 1      | 714.0414 | 2140.11  | 2.31  | 0.00165  | 12.5119  |
| POCOL4; PO | 0 | 1      | 399.5277 | 1196.569 | 1.9   | 0.00076  | 51.43059 |
| POCOL4; PO | 1 | 0.8485 | 418.0077 | 1669.009 | 2.36  | 0.00098  | 17.26229 |
| POCOL4; PO | 0 | 1      | 409.8975 | 1227.678 | 2.59  | 0.00106  | 43.0858  |
| POCOL4; PO | 0 | 0.7619 | 399.5596 | 1196.664 | 2.27  | 0.0009   | 39.83864 |
| POCOL4; PO | 1 | 0.7556 | 806.9397 | 1612.872 | 2.21  | 0.00178  | 5.22815  |
| POCOL5     | 0 | 0.7714 | 531.9326 | 1593.783 | 1.35  | 0.00072  | 0        |
| POCOL4; PO | 0 | 0.7895 | 698.9085 | 1396.81  | 1.35  | 0.00095  | 17.07978 |
| POCOL4; PO | 0 | 0.871  | 852.9581 | 1704.909 | 2.53  | 0.00216  | 8.635193 |
| POCOL4; PO | 0 | 0.4444 | 476.2759 | 1426.813 | -0.25 | -0.00012 | 11.83178 |
| POCOL4; PO | 0 | 0.9512 | 780.9061 | 1560.805 | 1.53  | 0.00119  | 10.07023 |
| POCOL4; PO | 1 | 1      | 459.2541 | 1833.994 | 3.3   | 0.00151  | 22.44029 |
| POCOL4; PO | 0 | 1      | 906.833  | 2718.484 | 1.37  | 0.00124  | 2.811582 |
| POCOL4; PO | 0 | 1      | 610.6805 | 1830.027 | 3.27  | 0.00199  | 9.225146 |
| POCOL4; PO | 0 | 1      | 410.9166 | 1230.735 | 2.08  | 0.00085  | 37.53095 |
| POCOL4; PO | 0 | 0.76   | 590.3304 | 1179.654 | 3.91  | 0.00231  | 0        |
| POCOL4; PO | 0 | 0.7759 | 492.2392 | 983.4711 | 1.79  | 0.00088  | 0        |
| POCOL4; PO | 0 | 0.8974 | 813.9114 | 1626.816 | 2.08  | 0.00169  | 11.69149 |
| POCOL4; PO | 1 | 1      | 535.7828 | 2140.11  | 2.28  | 0.00122  | 34.20444 |
| POCOL4; PO | 0 | 0.9062 | 542.9431 | 1626.815 | 1.47  | 0.0008   | 3.061351 |
| POCOL4; PO | 1 | 1      | 476.6142 | 1427.828 | 2.2   | 0.00105  | 38.80282 |
| POCOL4; PO | 0 | 0.4286 | 466.2755 | 1396.812 | 2.96  | 0.00138  | 7.190145 |
| POCOL4; PO | 1 | 0.6957 | 592.8262 | 2368.283 | 2.89  | 0.00171  | 0        |
| POCOL4; PO | 0 | 0.5312 | 814.434  | 1627.861 | 2.25  | 0.00183  | 10.15128 |
| POCOL4; PO | 0 | 0.9583 | 401.8856 | 1203.642 | 2.41  | 0.00097  | 13.84584 |
| POCOL4; PO | 0 | 0.7368 | 411.8785 | 1233.621 | 1.01  | 0.00042  | 5.811368 |
| POCOL4; PO | 0 | 0.8222 | 511.3119 | 1021.617 | 3.26  | 0.00167  | 36.4212  |
| POCOL4; PO | 0 | 1      | 401.8854 | 1203.642 | 1.88  | 0.00075  | 27.42783 |
| POCOL4; PO | 0 | 0.8667 | 511.3113 | 1021.615 | 2.13  | 0.00109  | 7.841673 |
| POCOL4; PO | 0 | 0.75   | 424.5696 | 1271.694 | 2.83  | 0.0012   | 14.03217 |
| POCOL4; PO | 0 | 0.8571 | 409.8972 | 1227.677 | 1.77  | 0.00072  | 37.2449  |
| POCOL4; PO | 1 | 1      | 420.9137 | 1260.727 | 0.3   | 0.00013  | 29.13715 |
| POCOL4; PO | 0 | 1      | 899.0994 | 2695.284 | 1.75  | 0.00157  | 71.5943  |
| POCOL4; PO | 0 | 0.9286 | 1348.146 | 2695.286 | 2.48  | 0.00334  | 0        |
| POCOL4; PO | 0 | 0.5714 | 466.2754 | 1396.812 | 2.76  | 0.00129  | 0        |
| POCOL4; PO | 0 | 0.9556 | 665.8625 | 1330.718 | 2.22  | 0.00148  | 3.229429 |
| POCOL4; PO | 0 | 0.9259 | 441.9233 | 1323.755 | 3.26  | 0.00144  | 36.00274 |
| POCOL4; PO | 0 | 0.7963 | 439.2596 | 877.512  | 1.03  | 0.00045  | 5.101516 |
| POCOL5     | 0 | 0.95   | 717.3466 | 1433.686 | 1.16  | 0.00083  | 7.366184 |
| POCOL4; PO | 0 | 0.9355 | 575.6501 | 1724.936 | 2.8   | 0.00161  | 12.00104 |
| POCOL4; PO | 0 | 1      | 598.7882 | 1196.569 | 2.3   | 0.00137  | 13.70312 |
| POCOL4; PO | 1 | 1      | 501.5902 | 1502.756 | 1.24  | 0.00062  | 0        |
| POCOL4; PO | 0 | 0.7805 | 780.9072 | 1560.807 | 2.85  | 0.00223  | 17.75122 |
| POCOL4; PO | 1 | 1      | 592.8243 | 2368.276 | -0.21 | -0.00012 | 3.518496 |
| POCOL4; PO | 1 | 0.8421 | 538.2929 | 1612.864 | -2.83 | -0.00152 | 86.75069 |
| POCOL4; PO | 1 | 0.9474 | 577.6785 | 1731.021 | 1.22  | 0.0007   | 39.13348 |

|            |   |        |          |          |      |         |          |
|------------|---|--------|----------|----------|------|---------|----------|
| POCOL4; PO | 0 | 0.7073 | 407.2438 | 1219.717 | 2.74 | 0.00111 | 40.93847 |
| POCOL4; PO | 0 | 0.9    | 680.3768 | 2718.485 | 1.74 | 0.00118 | 0        |
| POCOL4; PO | 0 | 0.7736 | 527.2651 | 1053.523 | 1.79 | 0.00094 | 31.35412 |
| POCOL4; PO | 1 | 0.9412 | 508.9726 | 1524.903 | 0.28 | 0.00014 | 40.52543 |
| POCOL4; PO | 1 | 0.9412 | 508.9726 | 1524.903 | 0.28 | 0.00014 | 40.52543 |
| POCOL5     | 0 | 0.8889 | 1081.218 | 3241.64  | 1.36 | 0.00147 | 1.881387 |
| POCOL4; PO | 1 | 0.8056 | 835.0076 | 1669.008 | 1.86 | 0.00155 | 6.720405 |
| POCOL4; PO | 0 | 0.5667 | 424.5695 | 1271.694 | 2.47 | 0.00105 | 16.01746 |
| POCOL4; PO | 1 | 0.7143 | 518.6358 | 1553.893 | 1.9  | 0.00098 | 18.45007 |
| POCOL4; PO | 0 | 0.95   | 548.3139 | 1095.621 | 2.33 | 0.00128 | 4.190257 |
| POCOL4; PO | 1 | 1      | 535.7826 | 2140.109 | 1.82 | 0.00097 | 23.43074 |
| POCOL4; PO | 0 | 1      | 526.7361 | 1052.465 | 0.53 | 0.00028 | 0        |
| POCOL4; PO | 0 | 0.9091 | 458.2622 | 1830.027 | 3.3  | 0.00151 | 38.84898 |
| POCOL4; PO | 0 | 0.2727 | 586.3351 | 1756.991 | 2.41 | 0.00141 | 7.217451 |
| POCOL4; PO | 0 | 0.8571 | 511.3111 | 1021.615 | 1.65 | 0.00084 | 7.670605 |
| POCOL4; PO | 0 | 0.6977 | 629.3596 | 1257.712 | 2.95 | 0.00185 | 5.895948 |
| POCOL4; PO | 0 | 0.7551 | 554.8356 | 1108.664 | 3.08 | 0.0017  | 11.00247 |
| POCOL4; PO | 0 | 1      | 617.3145 | 1233.622 | 1.64 | 0.00101 | 8.660937 |
| POCOL4; PO | 0 | 0.7838 | 554.8355 | 1108.664 | 2.86 | 0.00158 | 35.13182 |
| POCOL4; PO | 0 | 1      | 602.3248 | 1203.642 | 2.37 | 0.00143 | 6.424095 |
| POCOL4; PO | 1 | 0.9    | 630.8679 | 1260.729 | 1.84 | 0.00116 | 7.584723 |
| POCOL4; PO | 0 | 0.7143 | 722.4279 | 1443.848 | 1.27 | 0.00092 | 6.84609  |
| POCOL4; PO | 0 | 1      | 598.7878 | 1196.568 | 1.58 | 0.00095 | 6.408106 |
| POCOL4; PO | 0 | 0.9032 | 419.9082 | 1257.71  | 1.53 | 0.00064 | 17.20947 |
| POCOL4; PO | 0 | 0.8444 | 630.3146 | 1259.622 | 0.64 | 0.0004  | 2.893304 |
| POCOL4; PO | 0 | 0.8571 | 560.293  | 1119.579 | 2.17 | 0.00122 | 6.93324  |
| POCOL4; PO | 0 | 0.9487 | 607.3416 | 1213.676 | 3.03 | 0.00184 | 21.54747 |
| POCOL4; PO | 0 | 1      | 904.4326 | 2711.283 | 3.39 | 0.00306 | 0        |
| POCOL4; PO | 0 | 1      | 610.6796 | 1830.024 | 1.77 | 0.00108 | 0        |
| POCOL4; PO | 0 | 0.9583 | 590.9792 | 1770.923 | 4.93 | 0.00291 | 0        |
| POCOL4; PO | 0 | 0.8723 | 492.2389 | 983.4705 | 1.17 | 0.00058 | 11.76828 |
| POCOL4; PO | 0 | 1      | 852.9577 | 1704.908 | 2.03 | 0.00173 | 6.600808 |
| POCOL4; PO | 0 | 0.7368 | 511.3101 | 1021.613 | -0.2 | -0.0001 | 30.00844 |
| POCOL4; PO | 0 | 1      | 598.7905 | 1196.574 | 3.61 | 0.00216 | 0        |
| POCOL4; PO | 0 | 0.9697 | 399.5274 | 1196.568 | 1.14 | 0.00045 | 11.45088 |
| POCOL4; PO | 0 | 1      | 526.7377 | 1052.468 | 3.67 | 0.00193 | 0        |
| POCOL4; PO | 1 | 1      | 493.3085 | 1477.911 | 1.12 | 0.00055 | 42.24174 |
| POCOL4; PO | 1 | 0.75   | 592.8261 | 2368.282 | 2.68 | 0.00159 | 11.49942 |
| POCOL4; PO | 1 | 1      | 697.4254 | 2090.262 | 1.52 | 0.00106 | 33.36861 |
| POCOL4; PO | 0 | 0.8235 | 560.2942 | 1119.581 | 4.35 | 0.00244 | 15.10129 |
| POCOL4; PO | 0 | 1      | 806.3716 | 2417.1   | 0.9  | 0.00072 | 0        |
| POCOL4; PO | 0 | 0.9474 | 560.296  | 1119.585 | 7.52 | 0.00421 | 0        |
| POCOL4; PO | 0 | 0.8611 | 774.425  | 1547.843 | 5.53 | 0.00428 | 27.70102 |
| POCOL4; PO | 0 | 0.9778 | 488.7217 | 976.436  | 1.51 | 0.00074 | 25.58318 |
| POCOL4; PO | 0 | 0.75   | 554.8341 | 1108.661 | 0.43 | 0.00024 | 100      |
| POCOL4; PO | 0 | 0.8684 | 560.2941 | 1119.581 | 4.24 | 0.00238 | 2.274849 |
| POCOL4; PO | 0 | 0.9348 | 492.2383 | 983.4694 | 0.05 | 0.00003 | 16.58234 |
| POCOL4; PO | 0 | 0.7941 | 560.2938 | 1119.58  | 3.7  | 0.00207 | 0        |
| POCOL4; PO | 0 | 1      | 687.9223 | 1374.837 | 1.89 | 0.0013  | 5.978024 |
| POCOL4; PO | 1 | 0.9583 | 403.9734 | 1612.872 | 1.97 | 0.00079 | 21.62358 |
| POCOL4; PO | 0 | 0.8545 | 554.8359 | 1108.664 | 3.63 | 0.00201 | 18.59108 |
| POCOL4; PO | 1 | 0.8333 | 456.9215 | 1368.75  | 1.77 | 0.00081 | 16.56412 |

|            |   |        |          |          |       |          |          |
|------------|---|--------|----------|----------|-------|----------|----------|
| POCOL4; PO | 0 | 0.9091 | 482.7832 | 964.5591 | 0.7   | 0.00034  | 44.7948  |
| POCOL4; PO | 0 | 0.8421 | 525.8064 | 1050.606 | 2.08  | 0.00109  | 11.52102 |
| POCOL4; PO | 1 | 0.9    | 420.9141 | 1260.728 | 1.18  | 0.00049  | 37.17281 |
| POCOL4; PO | 0 | 0.7353 | 458.9526 | 1374.843 | 6.07  | 0.00278  | 39.229   |
| POCOL4; PO | 0 | 1      | 562.8051 | 1124.603 | 2.27  | 0.00128  | 11.01421 |
| POCOL4; PO | 0 | 1      | 482.756  | 964.5048 | 1.57  | 0.00076  | 11.29565 |
| POCOL4; PO | 0 | 0.9375 | 598.8365 | 1196.666 | 3.4   | 0.00203  | 16.29111 |
| POCOL4; PO | 0 | 0.9524 | 742.382  | 1483.757 | 1.16  | 0.00086  | 0        |
| POCOL4; PO | 0 | 0.8293 | 557.8166 | 1114.626 | 3.95  | 0.0022   | 13.47637 |
| POCOL4; PO | 0 |        | 586.3353 | 1756.991 | 2.72  | 0.00159  | 0        |
| POCOL4; PO | 0 | 1      | 399.5279 | 1196.569 | 2.21  | 0.00088  | 12.98866 |
| POCOL4; PO | 0 | 0.76   | 544.6714 | 1632     | 1.33  | 0.00072  | 8.001515 |
| POCOL4; PO | 0 | 0.9048 | 617.0269 | 1849.066 | 4.75  | 0.00293  | 29.99261 |
| POCOL4; PO | 0 | 1      | 458.9506 | 1374.837 | 1.88  | 0.00086  | 44.57616 |
| POCOL4; PO | 0 | 0.8684 | 525.806  | 1050.605 | 1.38  | 0.00072  | 21.83972 |
| POCOL4; PO | 0 | 1      | 447.5626 | 1340.673 | 1.2   | 0.00053  | 25.67226 |
| POCOL4; PO | 0 | 0      | 634.3692 | 1901.093 | 2.28  | 0.00145  | 16.75078 |
| POCOL4; PO | 0 | 0.9677 | 560.2945 | 1119.582 | 4.9   | 0.00274  | 0        |
| POCOL4; PO | 0 | 0.4    | 599.3169 | 1197.627 | 2.78  | 0.00167  | 3.641306 |
| POCOL4; PO | 0 | 0.8846 | 542.9433 | 1626.815 | 1.92  | 0.00104  | 5.438027 |
| POCOL4; PO | 0 | 0.6061 | 407.2438 | 1219.717 | 2.59  | 0.00105  | 13.25358 |
| POCOL4; PO | 1 | 1      | 714.0369 | 2140.096 | -3.93 | -0.00281 | 34.70642 |
| POCOL4; PO | 1 | 0.8125 | 621.8536 | 2484.393 | 2.99  | 0.00186  | 41.53924 |
| POCOL4; PO | 1 | 1      | 420.915  | 1260.73  | 3.21  | 0.00135  | 58.33232 |
| POCOL4; PO | 0 | 1      | 458.9503 | 1374.836 | 1.08  | 0.00049  | 76.27785 |
| POCOL4; PO | 0 | 1      | 548.3137 | 1095.62  | 2     | 0.0011   | 0        |
| POCOL4; PO | 0 | 0.75   | 419.9087 | 1257.711 | 2.62  | 0.0011   | 4.821672 |
| POCOL4; PO | 0 | 0.76   | 862.9706 | 1724.934 | 1.82  | 0.00157  | 43.96324 |
| POCOL4; PO | 0 | 1      | 674.577  | 2695.286 | 2.61  | 0.00176  | 0        |
| POCOL4; PO | 1 | 0.8    | 420.9142 | 1260.728 | 1.47  | 0.00062  | 30.87623 |
| POCOL4; PO | 0 | 1      | 730.4273 | 1459.847 | 3.99  | 0.00291  | 8.528147 |
| POCOL4; PO | 0 | 0.25   | 576.7958 | 2304.161 | 2.44  | 0.0014   | 29.14127 |
| POCOL4; PO | 0 | 0.9118 | 525.8063 | 1050.605 | 1.96  | 0.00103  | 3.130056 |
| POCOL4; PO | 0 | 1      | 780.9059 | 1560.805 | 1.29  | 0.00101  | 13.83405 |
| POCOL4; PO | 0 | 0.92   | 568.9929 | 1704.964 | 5.19  | 0.00295  | 8.115194 |
| POCOL4; PO | 0 | 0.7586 | 419.9086 | 1257.711 | 2.55  | 0.00107  | 46.55788 |
| POCOL4; PO | 0 | 1      | 542.291  | 1083.575 | 1.72  | 0.00093  | 6.112218 |
| POCOL4; PO | 0 | 0.9375 | 1064.557 | 2128.107 | 0.65  | 0.00069  | 0        |
| POCOL4; PO | 0 | 1      | 629.9681 | 1887.89  | 2.5   | 0.00157  | 78.46582 |
| POCOL4; PO | 0 | 1      | 562.8051 | 1124.603 | 2.38  | 0.00134  | 0        |
| POCOL4; PO | 0 | 1      | 548.3141 | 1095.621 | 2.67  | 0.00146  | 0        |
| POCOL4; PO | 0 | 1      | 568.9743 | 1704.908 | 2.17  | 0.00123  | 0        |
| POCOL4; PO | 1 | 1      | 421.0075 | 1681.008 | 4.86  | 0.00204  | 58.07848 |
| POCOL4; PO | 0 | 1      | 590.9782 | 1770.92  | 3.17  | 0.00187  | 0        |
| POCOL4; PO | 0 | 0.6207 | 630.3162 | 1259.625 | 3.25  | 0.00205  | 9.959315 |
| POCOL4; PO | 0 | 1      | 665.8615 | 1330.716 | 0.75  | 0.0005   | 0        |
| POCOL4; PO | 0 | 1      | 639.3193 | 1277.631 | 2.87  | 0.00183  | 14.56757 |
| P00739     | 0 | 1      | 505.2966 | 1513.875 | 1.48  | 0.00075  | 22.24131 |
| P00739; PO | 0 | 1      | 545.2894 | 1633.854 | 2.41  | 0.00131  | 8.85826  |
| P00739; PO | 0 | 0.6667 | 404.5835 | 1211.736 | 0.76  | 0.00031  | 23.85787 |
| P00739; PO | 0 | 0.8594 | 606.3724 | 1211.737 | 2.03  | 0.00123  | 6.361173 |
| P00739; PO | 0 | 0.575  | 404.583  | 1211.734 | -0.6  | -0.00024 | 14.35788 |



|            |   |        |          |          |       |          |          |
|------------|---|--------|----------|----------|-------|----------|----------|
| P00739     | 0 | 0.9211 | 534.0665 | 2133.244 | 0.95  | 0.00051  | 8.713562 |
| P00739; PO | 0 | 0.6452 | 404.5835 | 1211.736 | 0.68  | 0.00028  | 27.89671 |
| P00739     | 0 | 1      | 505.2962 | 1513.874 | 0.7   | 0.00035  | 28.60976 |
| P00739; PO | 0 | 1      | 789.972  | 1578.937 | 1.39  | 0.00109  | 5.505499 |
| P00739; PO | 0 | 1      | 526.9839 | 1578.937 | 1.65  | 0.00087  | 9.713168 |
| P00739; PO | 0 | 0.9362 | 717.9207 | 1434.834 | 1.11  | 0.00079  | 9.209297 |
| P00739; PO | 0 | 1      | 789.9721 | 1578.937 | 1.54  | 0.00122  | 7.52731  |
| P00739; PO | 0 | 0.9608 | 526.9834 | 1578.936 | 0.72  | 0.00038  | 6.662654 |
| P00739; PO | 0 | 1      | 533.9432 | 1599.815 | 2.84  | 0.00152  | 13.07789 |
| P00739; PO | 0 | 0.9863 | 800.4113 | 1599.815 | 3.08  | 0.00246  | 8.227809 |
| P00739; PO | 0 | 0.8714 | 800.411  | 1599.815 | 2.62  | 0.0021   | 0        |
| P00739; PO | 0 | 0.9821 | 545.2885 | 1633.851 | 0.73  | 0.0004   | 9.662613 |
| P00739; PO | 0 | 0.9565 | 545.2874 | 1633.848 | -1.4  | -0.00076 | 17.14644 |
| P00739; PO | 0 | 1      | 817.4298 | 1633.852 | 1.49  | 0.00122  | 5.912034 |
| P00739; PO | 0 | 1      | 545.2888 | 1633.852 | 1.18  | 0.00064  | 10.99026 |
| P00739; PO | 0 | 1      | 817.4294 | 1633.851 | 1.04  | 0.00085  | 9.215112 |
| P00739; PO | 0 | 0.9792 | 545.2889 | 1633.852 | 1.4   | 0.00077  | 40.41518 |
| P00739; PO | 0 | 1      | 545.2897 | 1633.855 | 2.97  | 0.00162  | 61.47524 |
| P00739; PO | 0 | 0.9211 | 545.2891 | 1633.853 | 1.74  | 0.00095  | 9.576406 |
| P00739; PO | 0 | 0.9615 | 545.2885 | 1633.851 | 0.73  | 0.0004   | 10.92377 |
| P00739; PO | 0 | 1      | 545.2891 | 1633.853 | 1.85  | 0.00101  | 7.647542 |
| P00739; PO | 0 | 0.9643 | 545.2882 | 1633.85  | 0.17  | 0.00009  | 7.670223 |
| P00739; PO | 0 | 0.9833 | 666.8856 | 1332.764 | 1.26  | 0.00084  | 6.644083 |
| P00739; PO | 0 | 1      | 607.3321 | 1819.982 | 2.58  | 0.00157  | 12.64681 |
| P00739; PO | 0 | 1      | 455.7507 | 1819.981 | 2.24  | 0.00102  | 11.57495 |
| P00739; PO | 1 | 0.4146 | 473.6367 | 1418.895 | 0.82  | 0.00039  | 28.42399 |
| P00739; PO | 1 | 0.9302 | 617.7175 | 1851.138 | 3.51  | 0.00217  | 19.44054 |
| P00739; PO | 0 | 0.8254 | 594.8354 | 1188.664 | 2.86  | 0.0017   | 10.16927 |
| P00739     | 0 | 0.8684 | 725.0243 | 2173.058 | 2.47  | 0.00179  | 0        |
| P00739; PO | 0 | 0.9744 | 817.4287 | 1633.85  | 0.14  | 0.00012  | 0        |
| P00739; PO | 0 | 0.9189 | 526.9843 | 1578.938 | 2.46  | 0.00129  | 10.61268 |
| P00739; PO | 0 | 1      | 604.8381 | 1208.669 | 1.98  | 0.00119  | 0        |
| P00739; PO | 0 | 1      | 604.837  | 1208.667 | 0.06  | 0.00003  | 5.94458  |
| P00739; PO | 0 | 1      | 604.8383 | 1208.669 | 2.18  | 0.00132  | 6.355654 |
| P00739; PO | 0 | 0.8333 | 545.2889 | 1633.852 | 1.52  | 0.00083  | 7.819473 |
| P00739; PO | 0 | 0.5556 | 444.9262 | 1332.764 | 1.3   | 0.00058  | 16.70804 |
| P00739; PO | 0 | 0.8387 | 594.8349 | 1188.663 | 2.04  | 0.00121  | 15.26654 |
| P00739; PO | 0 | 0.3125 | 404.5837 | 1211.736 | 1.13  | 0.00046  | 38.3526  |
| P00739; PO | 0 | 0.8621 | 526.9837 | 1578.937 | 1.3   | 0.00068  | 30.90254 |
| P00739; PO | 0 | 0.7692 | 444.9258 | 1332.763 | 0.61  | 0.00027  | 20.90685 |
| P00739; PO | 0 | 0.8889 | 450.258  | 1348.759 | 1.68  | 0.00076  | 28.44966 |
| P00739; PO | 0 | 0.7059 | 404.5837 | 1211.737 | 1.29  | 0.00052  | 32.86251 |
| P00739; PO | 0 | 0.5957 | 501.8018 | 1002.596 | 1.12  | 0.00056  | 26.13306 |
| P00739; PO | 0 | 0.381  | 404.5838 | 1211.737 | 1.44  | 0.00058  | 34.80645 |
| P00739; PO | 0 | 0.7037 | 404.5843 | 1211.738 | 2.8   | 0.00113  | 25.39663 |
| P00739; PO | 0 | 1      | 728.3563 | 1455.705 | -2.06 | -0.0015  | 0        |
| P00739; PO | 0 | 0.3784 | 573.8538 | 1146.7   | 2.73  | 0.00156  | 48.05908 |
| P00739; PO | 0 | 0.7347 | 534.3206 | 1067.634 | 0.94  | 0.0005   | 0        |
| P00739; PO | 0 | 0.9231 | 403.5613 | 1208.669 | 2.14  | 0.00086  | 9.922118 |
| P00739; PO | 0 | 0.5833 | 396.8925 | 1188.663 | 2.36  | 0.00094  | 0        |
| P00739; PO | 0 | 0.7333 | 604.8378 | 1208.668 | 1.47  | 0.00089  | 16.93134 |
| P00739; PO | 0 | 0.7812 | 604.8389 | 1208.67  | 3.19  | 0.00193  | 6.641055 |

|            |   |        |          |          |       |          |          |
|------------|---|--------|----------|----------|-------|----------|----------|
| P00739     | 0 | 0.8    | 757.4417 | 1513.876 | 2.06  | 0.00156  | 0        |
| P00739; PO | 0 | 0.8    | 604.8384 | 1208.67  | 2.48  | 0.0015   | 9.656388 |
| P00739; PO | 0 | 0.55   | 533.9431 | 1599.815 | 2.61  | 0.00139  | 29.20991 |
| P00739; PO | 0 | 0.5333 | 450.2581 | 1348.76  | 1.95  | 0.00088  | 42.17896 |
| P00739; PO | 0 | 0.625  | 573.852  | 1146.697 | -0.46 | -0.00027 | 22.40576 |
| P01861; PO | 0 | 0.9744 | 477.9235 | 1431.756 | 1.71  | 0.00081  | 13.87715 |
| P01861; PO | 0 | 1      | 716.3814 | 1431.756 | 1.44  | 0.00103  | 9.843532 |
| P01860     | 0 | 1      | 568.9728 | 1704.904 | 5.29  | 0.00301  | 12.98781 |
| P01857; PO | 0 | 0.8902 | 537.3005 | 1609.887 | 3.05  | 0.00164  | 13.45807 |
| P01860     | 0 | 1      | 568.9716 | 1704.9   | 3.25  | 0.00185  | 10.98584 |
| P01857; PO | 0 | 0.9608 | 805.447  | 1609.887 | 2.87  | 0.00231  | 0        |
| P01861; PO | 0 | 0.9429 | 477.9231 | 1431.755 | 0.81  | 0.00039  | 14.94996 |
| P01857; PO | 0 | 0.6667 | 483.9505 | 1449.837 | 2.21  | 0.00107  | 9.518343 |
| P01857; PO | 0 | 1      | 483.9502 | 1449.836 | 1.51  | 0.00073  | 24.07588 |
| P01860     | 0 | 1      | 500.585  | 1499.74  | 0.76  | 0.00038  | 0        |
| P01857; PO | 0 | 0.9643 | 563.8591 | 1126.711 | 3.07  | 0.00173  | 8.029201 |
| P01860     | 0 | 0.6667 | 665.8052 | 1330.603 | 2.39  | 0.00159  | 3.261047 |
| P01857; PO | 0 | 1      | 715.8931 | 1430.779 | 2.09  | 0.00149  | 3.09548  |
| P01857; PO | 0 | 1      | 477.5974 | 1430.778 | 1.06  | 0.0005   | 11.75311 |
| P01857; PO | 0 | 0.9697 | 715.8933 | 1430.779 | 2.34  | 0.00168  | 2.854816 |
| P01857; PO | 0 | 0.9672 | 715.8933 | 1430.779 | 2.34  | 0.00168  | 5.368532 |
| P01857; PO | 0 | 1      | 715.8925 | 1430.778 | 1.15  | 0.00082  | 0        |
| P01857; PO | 0 | 1      | 477.598  | 1430.779 | 2.33  | 0.00111  | 7.543014 |
| P01857; PO | 0 | 0.8621 | 477.5976 | 1430.778 | 1.5   | 0.00072  | 19.59222 |
| P01857; PO | 0 | 0.5357 | 537.3008 | 1609.888 | 3.5   | 0.00188  | 75.55756 |
| P01857; PO | 0 | 0.8889 | 563.8597 | 1126.712 | 4.26  | 0.0024   | 9.855687 |
| P01857; PO | 0 | 0.6981 | 426.218  | 851.4287 | -0.51 | -0.00022 | 5.356847 |
| P01857; PO | 0 | 0.7619 | 477.5977 | 1430.779 | 1.76  | 0.00084  | 49.38679 |
| P01861; PO | 0 | 0.8525 | 571.3118 | 1711.921 | 4.14  | 0.00236  | 10.60563 |
| P01861; PO | 0 | 0.9231 | 571.3099 | 1711.915 | 0.72  | 0.00041  | 8.676208 |
| P01861; PO | 0 | 0.9744 | 477.9235 | 1431.756 | 1.71  | 0.00081  | 13.87715 |
| P01861; PO | 0 | 1      | 716.3814 | 1431.756 | 1.44  | 0.00103  | 9.843532 |
| P01859     | 0 | 0.9138 | 732.0396 | 2194.104 | 2.77  | 0.00203  | 5.690258 |
| P01861; PO | 0 | 0.9429 | 477.9231 | 1431.755 | 0.81  | 0.00039  | 14.94996 |
| P01857; PO | 0 | 0.6667 | 483.9505 | 1449.837 | 2.21  | 0.00107  | 9.518343 |
| P01857; PO | 0 | 1      | 483.9502 | 1449.836 | 1.51  | 0.00073  | 24.07588 |
| P01859     | 0 | 1      | 668.9476 | 3340.709 | 0.26  | 0.00018  | 1.571693 |
| P01857; PO | 0 | 1      | 715.8931 | 1430.779 | 2.09  | 0.00149  | 3.09548  |
| P01857; PO | 0 | 1      | 477.5974 | 1430.778 | 1.06  | 0.0005   | 11.75311 |
| P01857; PO | 0 | 0.9697 | 715.8933 | 1430.779 | 2.34  | 0.00168  | 2.854816 |
| P01857; PO | 0 | 0.9672 | 715.8933 | 1430.779 | 2.34  | 0.00168  | 5.368532 |
| P01857; PO | 0 | 1      | 715.8925 | 1430.778 | 1.15  | 0.00082  | 0        |
| P01857; PO | 0 | 1      | 477.598  | 1430.779 | 2.33  | 0.00111  | 7.543014 |
| P01861; PO | 0 | 0.8571 | 856.4638 | 1711.92  | 3.79  | 0.00324  | 6.989905 |
| P01857; PO | 0 | 0.8621 | 477.5976 | 1430.778 | 1.5   | 0.00072  | 19.59222 |
| P01859     | 0 | 0.6735 | 556.8509 | 1112.695 | 2.47  | 0.00137  | 100      |
| P01859     | 0 | 0.7292 | 556.8519 | 1112.696 | 4.23  | 0.00235  | 0        |
| P01859     | 0 | 1      | 835.9345 | 3340.716 | 2.42  | 0.00202  | 4.225374 |
| P01857; PO | 0 | 0.6981 | 426.218  | 851.4287 | -0.51 | -0.00022 | 5.356847 |
| P01859     | 0 | 0.4    | 732.0386 | 2194.101 | 1.44  | 0.00105  | 12.75352 |
| P01857; PO | 0 | 0.7619 | 477.5977 | 1430.779 | 1.76  | 0.00084  | 49.38679 |
| Q13790     | 0 | 0.875  | 662.6901 | 1986.056 | 1.19  | 0.00079  | 7.805773 |

|            |   |        |          |          |       |          |          |
|------------|---|--------|----------|----------|-------|----------|----------|
| Q13790     | 0 | 0.7632 | 662.6874 | 1986.048 | -2.96 | -0.00196 | 21.35427 |
| Q13790     | 0 | 0.9038 | 662.6915 | 1986.06  | 3.22  | 0.00213  | 34.26013 |
| Q13790     | 0 | 1      | 740.8695 | 1480.732 | 1.92  | 0.00142  | 3.50881  |
| Q13790     | 0 | 0.9342 | 805.3857 | 1609.764 | 1.52  | 0.00122  | 7.707602 |
| Q13790     | 0 | 1      | 537.2594 | 1609.764 | 1.17  | 0.00063  | 11.6004  |
| Q13790     | 0 | 0.8182 | 537.259  | 1609.762 | 0.37  | 0.0002   | 21.61834 |
| P01034     | 0 | 0.9595 | 596.9708 | 1788.898 | 3.31  | 0.00197  | 2.723889 |
| P01034     | 0 | 1      | 894.9514 | 1788.896 | 2.09  | 0.00187  | 0        |
| P01034     | 0 | 1      | 602.3017 | 1804.891 | 2.1   | 0.00127  | 35.44664 |
| P01034     | 0 | 0.7568 | 505.6083 | 1514.81  | 0.7   | 0.00035  | 31.58549 |
| P01034     | 0 | 0.5938 | 408.8572 | 1224.557 | 1.87  | 0.00076  | 0        |
| P02775     | 0 | 0.75   | 463.6178 | 1388.839 | 2.67  | 0.00124  | 19.3585  |
| P02775     | 0 | 0.7969 | 694.9225 | 1388.838 | 1.85  | 0.00128  | 14.60299 |
| P02775     | 0 | 0.8889 | 620.0085 | 1858.011 | 0.76  | 0.00047  | 14.23052 |
| P02775     | 0 | 0.8846 | 376.8936 | 1128.666 | 4.15  | 0.00156  | 16.19851 |
| P02775     | 0 | 0.9091 | 465.2593 | 1858.015 | 3.12  | 0.00145  | 45.91182 |
| P14151     | 0 | 0.9189 | 445.2123 | 1333.622 | 2.05  | 0.00091  | 44.53681 |
| P14151     | 0 | 0.9455 | 726.6799 | 2178.025 | 2.9   | 0.00211  | 28.84433 |
| P14151     | 0 | 0.975  | 726.6803 | 2178.026 | 3.41  | 0.00247  | 4.053051 |
| P14151     | 0 | 0.7857 | 601.3298 | 1201.652 | 3.15  | 0.00189  | 4.11567  |
| Q15113     | 0 | 1      | 517.9089 | 1551.712 | 1.95  | 0.00101  | 28.86117 |
| Q15113     | 0 | 1      | 625.642  | 1874.912 | 3.8   | 0.00238  | 37.26224 |
| Q15113     | 0 | 0.8125 | 600.3443 | 1799.018 | 1.71  | 0.00102  | 44.85451 |
| P49908     | 0 | 0.84   | 668.871  | 1336.735 | 2.14  | 0.00143  | 10.30466 |
| P49908     | 0 | 0.8868 | 600.806  | 1200.605 | 2.46  | 0.00147  | 14.37117 |
| P49908     | 0 | 1      | 446.249  | 1336.733 | 0.44  | 0.0002   | 23.66555 |
| P49908     | 1 | 0.7857 | 426.2675 | 1276.788 | 4.15  | 0.00177  | 34.49136 |
| P49908     | 0 | 0.9032 | 600.8051 | 1200.603 | 0.93  | 0.00056  | 10.72482 |
| P16070     | 0 | 1      | 510.9573 | 1530.857 | 1.66  | 0.00085  | 6.603345 |
| P16070     | 0 | 1      | 510.9571 | 1530.857 | 1.19  | 0.0006   | 42.37265 |
| P16070     | 0 | 0.5263 | 441.2562 | 1321.754 | 2.55  | 0.00112  | 27.20519 |
| P16070     | 0 | 0.4286 | 441.2565 | 1321.755 | 3.24  | 0.00143  | 6.555589 |
| P16070     | 0 | 0.6207 | 399.2137 | 1195.627 | 2.86  | 0.00114  | 8.330242 |
| Q02325; Q1 | 0 | 0.8    | 584.823  | 1168.639 | 2.92  | 0.00171  | 12.57676 |
| Q15195; PC | 1 | 0.9167 | 475.6111 | 1424.819 | 0.93  | 0.00044  | 26.07081 |
| Q02325; Q1 | 0 | 0.5833 | 390.2174 | 1168.638 | 2.1   | 0.00082  | 27.11907 |
| Q15195; PC | 0 | 0.6585 | 569.3429 | 1137.679 | 2.41  | 0.00137  | 4.224358 |
| Q15195; PC | 0 | 0.6364 | 569.3433 | 1137.679 | 3.16  | 0.0018   | 14.98462 |
| Q02325; Q1 | 0 | 0.8182 | 584.8233 | 1168.639 | 3.44  | 0.00201  | 7.360862 |
| Q02325; Q1 | 0 | 0.5833 | 390.2172 | 1168.637 | 1.55  | 0.00061  | 10.91142 |
| Q02325; Q1 | 0 | 0.44   | 390.2168 | 1168.636 | 0.38  | 0.00015  | 14.30095 |
| Q15485     | 0 | 0.8889 | 664.34   | 1991.005 | 2.67  | 0.00178  | 0        |
| Q15485     | 0 | 0.9245 | 664.3398 | 1991.005 | 2.49  | 0.00165  | 0        |
| Q15485     | 0 | 1      | 601.3024 | 1201.597 | 0.41  | 0.00025  | 5.559122 |
| Q15485; OC | 0 | 0.4    | 525.2898 | 1049.572 | 0.58  | 0.00031  | 0        |
| P63267; P6 | 0 | 0.7826 | 483.9488 | 1449.832 | 6.36  | 0.00307  | 34.84767 |
| P63267; P6 | 0 | 1      | 487.2637 | 1459.777 | 0.94  | 0.00046  | 46.31744 |
| A5A3E0; P6 | 0 | 0.8636 | 645.6713 | 1934.999 | 2.72  | 0.00175  | 55.86254 |
| P63267; P6 | 0 | 0.7826 | 483.9488 | 1449.832 | 6.36  | 0.00307  | 34.84767 |
| P63267; P6 | 0 | 1      | 487.2637 | 1459.777 | 0.94  | 0.00046  | 46.31744 |
| A5A3E0; P6 | 0 | 0.8636 | 645.6713 | 1934.999 | 2.72  | 0.00175  | 55.86254 |
| Q9UNW1     | 0 | 0.9333 | 619.2996 | 1855.884 | 3.59  | 0.00222  | 0        |

|            |   |        |          |          |       |          |          |
|------------|---|--------|----------|----------|-------|----------|----------|
| Q9UNW1     | 0 | 0.8621 | 393.9082 | 1179.71  | 1.87  | 0.00073  | 37.77554 |
| Q9UNW1     | 0 | 1      | 694.9902 | 2082.956 | 0.44  | 0.00031  | 7.746798 |
| P13645     | 0 | 1      | 503.9196 | 1509.744 | 1.8   | 0.00091  | 39.63369 |
| P13645     | 0 | 0.5714 | 557.2896 | 1669.854 | 1.19  | 0.00066  | 0        |
| Q14532; O7 | 0 | 0.875  | 404.2042 | 807.4011 | 1.86  | 0.00075  | 3.074318 |
| O14786     | 0 | 0.6829 | 522.975  | 1566.911 | 0.77  | 0.0004   | 40.14544 |
| O14786     | 0 | 1      | 593.3361 | 1777.994 | 3.67  | 0.00217  | 30.00705 |
| O14786     | 0 | 0.6774 | 537.3516 | 1073.696 | 3.5   | 0.00188  | 23.04314 |
| Q9Y5Y7     | 0 | 0.5897 | 397.8992 | 1191.683 | 0.54  | 0.00021  | 5.773323 |
| Q9Y5Y7     | 0 | 0.5882 | 580.3881 | 1159.769 | 3.1   | 0.0018   | 43.75885 |
| Q9Y5Y7     | 0 | 0.6667 | 625.3942 | 1249.781 | 1.49  | 0.00093  | 50.40883 |
| Q9NPH3     | 0 | 0.5682 | 512.6077 | 1535.809 | -0.66 | -0.00034 | 22.06363 |
| Q9NPH3     | 0 | 0.814  | 545.8578 | 1090.708 | 0.82  | 0.00045  | 10.02885 |
| Q9NPH3     | 0 | 0.9    | 473.294  | 1417.867 | 1.18  | 0.00056  | 6.004278 |
| Q9HDC9     | 0 | 1      | 592.8535 | 1184.7   | 3.91  | 0.00231  | 4.244822 |
| Q9HDC9     | 0 | 0.4828 | 459.9312 | 1377.779 | 1.47  | 0.00067  | 22.26415 |
| Q9HDC9     | 0 | 0.3333 | 525.6472 | 1574.927 | 1.75  | 0.00092  | 37.24336 |
| P22105; Q1 | 0 | 1      | 584.3294 | 1750.974 | 3.98  | 0.00232  | 6.555482 |
| P22105     | 0 | 0.6    | 596.6733 | 1788.005 | 3.35  | 0.002    | 23.84114 |
| P22105; Q1 | 0 | 0.6667 | 621.864  | 1242.721 | 2.59  | 0.00161  | 50.187   |
| A5A3E0; Q9 | 0 | 1      | 554.2729 | 1660.804 | -0.37 | -0.0002  | 38.75434 |
| A5A3E0; P6 | 0 | 0.8636 | 645.6713 | 1934.999 | 2.72  | 0.00175  | 55.86254 |
| A5A3E0; Q9 | 0 | 1      | 505.9223 | 1515.752 | 2.11  | 0.00107  | 29.73994 |
| A5A3E0; Q9 | 0 | 1      | 554.2729 | 1660.804 | -0.37 | -0.0002  | 38.75434 |
| A5A3E0; P6 | 0 | 0.8636 | 645.6713 | 1934.999 | 2.72  | 0.00175  | 55.86254 |
| A5A3E0; Q9 | 0 | 1      | 505.9223 | 1515.752 | 2.11  | 0.00107  | 29.73994 |
| A5A3E0; Q9 | 0 | 1      | 554.2729 | 1660.804 | -0.37 | -0.0002  | 38.75434 |
| A5A3E0; P6 | 0 | 0.8636 | 645.6713 | 1934.999 | 2.72  | 0.00175  | 55.86254 |
| A5A3E0; Q9 | 0 | 1      | 505.9223 | 1515.752 | 2.11  | 0.00107  | 29.73994 |
| Q15063     | 0 | 1      | 453.9575 | 1359.858 | 0.56  | 0.00026  | 66.04424 |
| Q15063     | 0 | 0.7955 | 579.8727 | 1158.738 | 3.85  | 0.00223  | 7.175214 |
| Q15063     | 0 | 0.5333 | 573.3596 | 1145.712 | -1.1  | -0.00063 | 37.00546 |
| P04040     | 0 | 1      | 421.8919 | 1263.661 | 0.74  | 0.00031  | 26.83989 |
| P04040     | 0 | 0.9231 | 606.3483 | 1817.03  | 5.76  | 0.00349  | 31.67634 |
| P04040     | 0 | 0.95   | 653.0134 | 1957.026 | 1.17  | 0.00076  | 0        |
| P98160     | 0 | 0.8621 | 490.744  | 980.4806 | 1.07  | 0.00053  | 16.7303  |
| P98160     | 0 | 0.9444 | 635.663  | 1904.974 | 4.56  | 0.00289  | 42.13707 |
| P98160     | 0 | 0.973  | 575.2916 | 1149.576 | 5.93  | 0.00341  | 0        |
| POCOL4; PO | 0 | 0.88   | 814.4339 | 1627.861 | 2.17  | 0.00177  | 11.91346 |
| POCOL4; PO | 0 | 0.72   | 543.2917 | 1627.861 | 2.17  | 0.00117  | 2.514847 |
| POCOL4; PO | 0 | 0.9589 | 814.4331 | 1627.859 | 1.2   | 0.00098  | 6.002271 |
| POCOL4; PO | 0 | 0.7451 | 543.2906 | 1627.857 | 0.14  | 0.00008  | 11.02971 |
| POCOL4; PO | 0 | 0.9467 | 543.2921 | 1627.862 | 2.84  | 0.00154  | 8.938625 |
| POCOL4; PO | 0 | 0.1429 | 440.0023 | 1756.987 | 0.38  | 0.00017  | 13.3462  |
| POCOL4; PO | 1 | 0.8929 | 790.0978 | 2368.279 | 1.16  | 0.00092  | 9.614325 |
| POCOL4; PO | 0 | 0.8214 | 543.2907 | 1627.857 | 0.25  | 0.00014  | 0        |
| POCOL4; PO | 0 | 0.9559 | 610.679  | 1830.022 | 0.67  | 0.00041  | 8.518244 |
| POCOL4; PO | 0 | 0.8901 | 915.5165 | 1830.026 | 2.58  | 0.00236  | 6.086547 |
| POCOL4; PO | 0 | 0.8864 | 458.2622 | 1830.027 | 3.16  | 0.00145  | 2.335641 |
| POCOL4; PO | 0 | 1      | 610.6807 | 1830.027 | 3.47  | 0.00212  | 17.67647 |
| POCOL4; PO | 0 | 1      | 610.6804 | 1830.027 | 3.07  | 0.00187  | 9.608068 |
| POCOL4; PO | 0 | 1      | 636.3515 | 1271.696 | 3.9   | 0.00248  | 14.22901 |

|            |   |        |          |          |      |         |          |
|------------|---|--------|----------|----------|------|---------|----------|
| POCOL4; PO | 0 | 0.8824 | 459.9129 | 1377.724 | 1.79 | 0.00082 | 0        |
| POCOL4; PO | 0 | 0.7368 | 557.8151 | 1114.623 | 1.21 | 0.00068 | 0        |
| POCOL4; PO | 0 | 0.9608 | 636.3503 | 1271.693 | 1.98 | 0.00126 | 7.495775 |
| POCOL4; PO | 1 | 0.7333 | 592.8256 | 2368.281 | 1.96 | 0.00116 | 2.025505 |
| POCOL4; PO | 1 | 0.88   | 790.0981 | 2368.28  | 1.55 | 0.00122 | 4.007072 |
| POCOL4; PO | 1 | 0.7407 | 592.8265 | 2368.284 | 3.5  | 0.00207 | 65.63628 |
| POCOL4; PO | 1 | 0.963  | 790.0977 | 2368.279 | 1.09 | 0.00086 | 5.731484 |
| POCOL4; PO | 1 | 0.9706 | 790.0981 | 2368.28  | 1.63 | 0.00129 | 6.935635 |
| POCOL4; PO | 1 | 1      | 571.8116 | 2284.225 | 7.79 | 0.00445 | 20.25506 |
| POCOL4; PO | 1 | 0.9118 | 762.0757 | 2284.213 | 2.61 | 0.00199 | 0        |
| POCOL4; PO | 0 | 1      | 710.0423 | 2128.112 | 3.17 | 0.00225 | 84.79305 |
| POCOL4; PO | 0 | 0.8197 | 615.872  | 1230.737 | 3.21 | 0.00198 | 13.4027  |
| POCOL4; PO | 0 | 1      | 542.2908 | 1083.574 | 1.49 | 0.00081 | 1.305774 |
| POCOL4; PO | 1 | 0.8049 | 470.6024 | 1409.793 | 3.44 | 0.00162 | 17.80892 |
| POCOL4; PO | 0 | 0.7    | 481.956  | 1443.854 | 4.79 | 0.00231 | 13.23638 |
| POCOL4; PO | 0 | 0.7015 | 662.3807 | 1323.754 | 2.28 | 0.00151 | 3.729706 |
| POCOL4; PO | 0 | 0.6579 | 524.311  | 1570.918 | 1.83 | 0.00096 | 6.544328 |
| POCOL4; PO | 1 | 0.9074 | 490.2613 | 1468.769 | 1.87 | 0.00091 | 25.50551 |
| POCOL4; PO | 1 | 0.9074 | 490.2613 | 1468.769 | 1.87 | 0.00091 | 25.50551 |
| POCOL4; PO | 1 | 1      | 490.2612 | 1468.769 | 1.8  | 0.00088 | 2.070895 |
| POCOL4; PO | 1 | 1      | 490.2612 | 1468.769 | 1.8  | 0.00088 | 2.070895 |
| POCOL4; PO | 0 | 1      | 904.4314 | 2711.28  | 2.11 | 0.00191 | 1.925776 |
| POCOL4; PO | 0 | 0.8333 | 399.5598 | 1196.665 | 2.57 | 0.00103 | 10.67162 |
| POCOL4; PO | 0 | 0.697  | 481.9547 | 1443.85  | 2.13 | 0.00102 | 11.48204 |
| POCOL4; PO | 0 | 1      | 899.0993 | 2695.283 | 1.62 | 0.00145 | 1.309225 |
| POCOL4; PO | 0 | 1      | 899.0989 | 2695.282 | 1.21 | 0.00108 | 2.199146 |
| POCOL4; PO | 0 | 1      | 851.0645 | 2551.179 | 0.73 | 0.00062 | 0        |
| POCOL4; PO | 0 | 0.9524 | 862.9702 | 1724.933 | 1.32 | 0.00114 | 7.43602  |
| POCOL4; PO | 0 | 0.9444 | 575.6502 | 1724.936 | 2.9  | 0.00167 | 28.3975  |
| POCOL4; PO | 0 | 0.9298 | 575.65   | 1724.936 | 2.69 | 0.00155 | 8.106833 |
| POCOL4; PO | 0 | 0.962  | 862.971  | 1724.935 | 2.24 | 0.00193 | 1.706079 |
| POCOL4; PO | 0 | 0.9268 | 575.6498 | 1724.935 | 2.37 | 0.00136 | 11.78024 |
| POCOL4; PO | 0 | 0.8571 | 862.9707 | 1724.934 | 1.89 | 0.00163 | 10.14675 |
| POCOL4; PO | 0 | 0.9815 | 575.6504 | 1724.937 | 3.33 | 0.00191 | 8.231376 |
| POCOL4; PO | 0 | 0.8571 | 590.9779 | 1770.919 | 2.76 | 0.00163 | 31.60502 |
| POCOL4; PO | 0 | 0.9104 | 590.9768 | 1770.916 | 0.8  | 0.00047 | 3.83896  |
| POCOL4; PO | 0 | 0.8462 | 885.9625 | 1770.918 | 1.91 | 0.00169 | 3.769225 |
| POCOL4; PO | 0 | 0.92   | 590.9765 | 1770.915 | 0.38 | 0.00023 | 4.631679 |
| POCOL4; PO | 0 | 0.5714 | 468.5796 | 1403.724 | 0.71 | 0.00033 | 27.22315 |
| POCOL4; PO | 0 | 0.987  | 702.3669 | 1403.726 | 2.39 | 0.00168 | 6.447455 |
| POCOL4; PO | 0 | 0.9189 | 459.9125 | 1377.723 | 0.72 | 0.00033 | 9.700747 |
| POCOL4; PO | 0 | 0.7647 | 599.3157 | 1197.624 | 0.75 | 0.00045 | 4.685958 |
| POCOL4; PO | 0 | 0.9167 | 459.9125 | 1377.723 | 0.72 | 0.00033 | 3.849536 |
| POCOL4; PO | 0 | 0.8649 | 459.9129 | 1377.724 | 1.79 | 0.00082 | 3.418623 |
| POCOL4; PO | 1 | 1      | 490.2617 | 1468.771 | 2.74 | 0.00134 | 68.65987 |
| POCOL4; PO | 0 | 0.9831 | 458.9499 | 1374.835 | 0.21 | 0.0001  | 8.918069 |
| POCOL4; PO | 0 | 0.7882 | 687.9224 | 1374.838 | 2.07 | 0.00142 | 6.157514 |
| POCOL4; PO | 1 | 1      | 490.2617 | 1468.771 | 2.74 | 0.00134 | 68.65987 |
| POCOL4; PO | 0 | 1      | 458.9507 | 1374.838 | 2.14 | 0.00098 | 8.437518 |
| POCOL4; PO | 0 | 0.9808 | 662.0079 | 1984.009 | 2.79 | 0.00184 | 19.66835 |
| POCOL4; PO | 0 | 1      | 572.7972 | 2288.167 | 2.69 | 0.00154 | 16.94717 |
| POCOL4; PO | 0 | 0.8723 | 722.4288 | 1443.85  | 2.62 | 0.00189 | 8.394596 |

|            |   |        |          |          |       |          |          |
|------------|---|--------|----------|----------|-------|----------|----------|
| POCOL4; PO | 0 | 1      | 481.955  | 1443.85  | 2.64  | 0.00127  | 18.88451 |
| POCOL4; PO | 0 | 0.8706 | 790.413  | 2369.224 | 1.66  | 0.00131  | 7.247535 |
| POCOL4; PO | 1 | 1      | 538.2988 | 1612.882 | 8.3   | 0.00446  | 28.51182 |
| POCOL4; PO | 0 | 0.6596 | 576.7955 | 2304.16  | 2.01  | 0.00116  | 5.662117 |
| POCOL4; PO | 1 | 1      | 571.8084 | 2284.212 | 2.23  | 0.00128  | 2.234328 |
| POCOL4; PO | 1 | 1      | 762.0748 | 2284.21  | 1.33  | 0.00101  | 2.679379 |
| POCOL4; PO | 1 | 1      | 571.808  | 2284.21  | 1.59  | 0.00091  | 2.213109 |
| POCOL4; PO | 1 | 1      | 762.075  | 2284.21  | 1.65  | 0.00126  | 2.43145  |
| POCOL4; PO | 0 | 1      | 634.368  | 1901.09  | 0.45  | 0.00029  | 7.470258 |
| POCOL4; PO | 0 | 1      | 476.0281 | 1901.091 | 0.99  | 0.00047  | 7.908507 |
| POCOL4; PO | 1 | 0.9792 | 762.0773 | 2284.217 | 4.7   | 0.00358  | 0        |
| POCOL4; PO | 1 | 1      | 571.8112 | 2284.223 | 7.04  | 0.00402  | 14.00352 |
| POCOL4; PO | 0 | 0.8525 | 409.8971 | 1227.677 | 1.47  | 0.0006   | 10.92853 |
| POCOL4; PO | 0 | 0.8636 | 614.3425 | 1227.678 | 2.4   | 0.00147  | 3.654341 |
| POCOL4; PO | 0 | 0.8621 | 409.8967 | 1227.676 | 0.65  | 0.00027  | 5.003325 |
| POCOL4; PO | 0 | 1      | 1126.59  | 2252.174 | 2.53  | 0.00285  | 1.71125  |
| POCOL4; PO | 0 | 1      | 751.3956 | 2252.172 | 1.88  | 0.00141  | 2.23579  |
| POCOL4; PO | 0 | 1      | 1215.597 | 3644.776 | 1.73  | 0.0021   | 0        |
| POCOL4; PO | 0 | 1      | 911.949  | 3644.774 | 1.14  | 0.00104  | 0.705887 |
| POCOL4; PO | 0 | 0.7143 | 399.5596 | 1196.664 | 2.19  | 0.00087  | 8.869975 |
| POCOL4; PO | 0 | 0.5517 | 524.3106 | 1570.917 | 1.13  | 0.00059  | 53.46223 |
| POCOL4; PO | 0 | 0.9231 | 698.9091 | 1396.811 | 2.23  | 0.00156  | 6.511384 |
| POCOL4; PO | 0 | 0.9855 | 617.0257 | 1849.063 | 2.77  | 0.00171  | 25.65826 |
| POCOL4; PO | 0 | 1      | 617.0252 | 1849.061 | 1.88  | 0.00116  | 47.37478 |
| POCOL4; PO | 0 | 0.94   | 733.3654 | 2198.082 | -1.93 | -0.00141 | 65.47301 |
| POCOL4; PO | 0 | 1      | 695.02   | 2083.046 | 1.08  | 0.00075  | 0        |
| POCOL4; PO | 0 | 1      | 617.025  | 1849.06  | 1.58  | 0.00097  | 19.06164 |
| POCOL4; PO | 0 | 1      | 617.0253 | 1849.061 | 2.08  | 0.00128  | 6.541273 |
| POCOL4; PO | 0 | 1      | 706.8581 | 2824.411 | 1.52  | 0.00107  | 3.352633 |
| POCOL4; PO | 0 | 1      | 763.3923 | 2288.162 | 0.74  | 0.00057  | 4.858709 |
| POCOL4; PO | 0 | 1      | 572.7972 | 2288.167 | 2.69  | 0.00154  | 3.311056 |
| POCOL4; PO | 0 | 1      | 763.3929 | 2288.164 | 1.46  | 0.00112  | 3.275803 |
| POCOL4; PO | 0 | 1      | 572.7966 | 2288.165 | 1.73  | 0.00099  | 1.890797 |
| POCOL4; PO | 0 | 1      | 942.143  | 2824.414 | 2.91  | 0.00274  | 1.905259 |
| POCOL4; PO | 0 | 1      | 942.1425 | 2824.413 | 2.32  | 0.00219  | 2.277306 |
| POCOL4; PO | 0 | 1      | 572.7976 | 2288.168 | 3.33  | 0.0019   | 3.885201 |
| POCOL4; PO | 0 | 1      | 706.8582 | 2824.411 | 1.6   | 0.00113  | 2.626854 |
| POCOL4; PO | 1 | 0.9091 | 418.0074 | 1669.008 | 1.63  | 0.00068  | 17.1066  |
| POCOL4; PO | 0 | 1      | 572.7955 | 2288.16  | -0.3  | -0.00017 | 0        |
| POCOL4; PO | 1 | 1      | 557.0079 | 1669.009 | 2.51  | 0.0014   | 10.70534 |
| POCOL4; PO | 0 | 1      | 710.0408 | 2128.108 | 1.02  | 0.00072  | 1.937721 |
| POCOL4; PO | 1 | 0.8864 | 418.006  | 1669.002 | -1.66 | -0.00069 | 8.256634 |
| POCOL4; PO | 1 | 0.9737 | 557.0076 | 1669.008 | 2.07  | 0.00115  | 13.86559 |
| POCOL4; PO | 0 | 1      | 532.7825 | 2128.108 | 1.15  | 0.00061  | 25.97721 |
| POCOL4; PO | 0 | 0.9375 | 710.0416 | 2128.11  | 2.22  | 0.00158  | 12.2241  |
| POCOL4; PO | 0 | 0.8421 | 679.3927 | 1357.778 | 2.88  | 0.00195  | 12.50909 |
| POCOL4; PO | 0 | 0.5957 | 453.2638 | 1357.777 | 1.99  | 0.0009   | 14.11089 |
| POCOL4; PO | 0 | 0.86   | 629.8673 | 1258.727 | 2.91  | 0.00183  | 22.45838 |
| POCOL4; PO | 0 | 0.8197 | 453.2637 | 1357.777 | 1.72  | 0.00078  | 6.476308 |
| POCOL4; PO | 0 | 0.9286 | 679.392  | 1357.777 | 1.89  | 0.00128  | 4.755651 |
| POCOL4; PO | 1 | 0.9787 | 557.0079 | 1669.009 | 2.51  | 0.0014   | 11.11647 |
| POCOL4; PO | 0 | 1      | 710.0415 | 2128.11  | 2.05  | 0.00145  | 0        |

|            |   |        |          |          |       |          |          |
|------------|---|--------|----------|----------|-------|----------|----------|
| POCOL4; PO | 0 | 1      | 706.8581 | 2824.411 | 1.52  | 0.00107  | 1.25589  |
| POCOL4; PO | 0 | 0.9821 | 463.0205 | 1849.06  | 1.44  | 0.00067  | 8.049833 |
| POCOL4; PO | 0 | 0.8714 | 925.0349 | 1849.062 | 2.71  | 0.00251  | 5.728807 |
| POCOL4; PO | 0 | 0.9275 | 617.0245 | 1849.059 | 0.89  | 0.00055  | 9.125571 |
| POCOL4; PO | 0 | 1      | 463.0206 | 1849.061 | 1.77  | 0.00082  | 10.18817 |
| POCOL4; PO | 0 | 1      | 925.0341 | 1849.061 | 1.85  | 0.00171  | 0        |
| POCOL4; PO | 0 | 1      | 617.025  | 1849.06  | 1.58  | 0.00097  | 7.924266 |
| POCOL4; PO | 0 | 0.902  | 617.0258 | 1849.063 | 2.97  | 0.00183  | 39.13517 |
| POCOL4; PO | 0 | 0.8367 | 568.9914 | 1704.96  | 2.51  | 0.00143  | 6.909508 |
| POCOL4; PO | 0 | 0.3689 | 1063.531 | 3188.578 | 1.4   | 0.00148  | 3.788276 |
| POCOL4; PO | 0 | 0.3882 | 797.8998 | 3188.577 | 1.03  | 0.00082  | 3.799753 |
| POCOL4; PO | 0 | 1      | 710.0415 | 2128.11  | 2.05  | 0.00145  | 1.810176 |
| POCOL4; PO | 0 | 0.7188 | 399.5593 | 1196.663 | 1.5   | 0.0006   | 23.17154 |
| POCOL4; PO | 0 | 1      | 670.8411 | 1340.675 | 2.57  | 0.00172  | 4.709168 |
| POCOL4; PO | 0 | 0.8298 | 629.8673 | 1258.727 | 3     | 0.00189  | 8.2719   |
| POCOL4; PO | 0 | 0.8958 | 629.8668 | 1258.726 | 2.23  | 0.0014   | 32.32337 |
| POCOL4; PO | 0 | 1      | 911.9504 | 3644.78  | 2.74  | 0.0025   | 5.921183 |
| POCOL4; PO | 0 | 1      | 1215.599 | 3644.782 | 3.43  | 0.00417  | 0        |
| POCOL4     | 0 | 0.7759 | 531.9322 | 1593.782 | 0.54  | 0.00029  | 9.806005 |
| POCOL4; PO | 0 | 0.9912 | 876.4736 | 2627.406 | 2.03  | 0.00178  | 2.412186 |
| POCOL4; PO | 0 | 1      | 974.8275 | 2922.468 | 2.69  | 0.00262  | 0        |
| POCOL4; PO | 0 | 1      | 926.7924 | 2778.363 | 1.6   | 0.00148  | 26.17738 |
| POCOL4; PO | 0 | 1      | 1068.863 | 3204.576 | 2.1   | 0.00224  | 6.34409  |
| POCOL4; PO | 0 | 1      | 733.3691 | 2198.093 | 3.24  | 0.00237  | 42.34372 |
| POCOL4; PO | 0 | 1      | 1242.156 | 2483.305 | 2.4   | 0.00298  | 0        |
| POCOL4; PO | 0 | 1      | 1314.207 | 2627.406 | 1.99  | 0.00261  | 0        |
| POCOL4; PO | 0 | 0.9184 | 685.3339 | 2053.987 | 1.72  | 0.00117  | 2.506288 |
| POCOL4; PO | 1 | 1      | 538.2955 | 1612.872 | 2.05  | 0.0011   | 19.50909 |
| POCOL4; PO | 1 | 1      | 538.2947 | 1612.87  | 0.69  | 0.00037  | 38.42788 |
| POCOL4; PO | 0 | 0.8095 | 409.8974 | 1227.678 | 2.29  | 0.00094  | 12.2222  |
| POCOL4; PO | 0 | 0.7937 | 554.836  | 1108.665 | 3.85  | 0.00213  | 9.636339 |
| POCOL4; PO | 1 | 0.9773 | 538.295  | 1612.871 | 1.26  | 0.00068  | 15.72817 |
| POCOL4; PO | 1 | 0.9898 | 538.2946 | 1612.869 | 0.46  | 0.00025  | 8.549582 |
| POCOL4; PO | 1 | 1      | 538.2954 | 1612.872 | 1.94  | 0.00104  | 9.702331 |
| POCOL4; PO | 0 | 0.8    | 560.2935 | 1119.58  | 3.15  | 0.00177  | 11.31302 |
| POCOL4; PO | 0 | 0.9333 | 610.6798 | 1830.025 | 1.97  | 0.0012   | 44.52637 |
| POCOL4; PO | 1 | 0.9677 | 563.6411 | 1688.909 | 1.81  | 0.00102  | 4.968037 |
| POCOL4; PO | 0 | 1      | 1209.052 | 2417.098 | -0.21 | -0.00025 | 0        |
| POCOL4; PO | 0 | 1      | 806.3714 | 2417.1   | 0.59  | 0.00048  | 3.273516 |
| POCOL4     | 0 | 0.9762 | 819.8998 | 3276.577 | 1.87  | 0.00153  | 2.581899 |
| POCOL4     | 0 | 1      | 1092.862 | 3276.572 | 0.36  | 0.0004   | 1.932639 |
| POCOL4; PO | 0 | 1      | 733.3657 | 2198.083 | -1.43 | -0.00105 | 36.81449 |
| POCOL4; PO | 0 | 1      | 733.3678 | 2198.089 | 1.4   | 0.00103  | 14.15553 |
| POCOL4; PO | 0 | 0.9783 | 733.3682 | 2198.09  | 1.9   | 0.00139  | 11.64252 |
| POCOL4; PO | 0 | 1      | 733.3679 | 2198.089 | 1.49  | 0.00109  | 8.001216 |
| POCOL4; PO | 0 | 1      | 629.9674 | 1887.888 | 1.43  | 0.0009   | 4.39021  |
| POCOL4; PO | 0 | 0.9048 | 944.447  | 1887.887 | 0.89  | 0.00084  | 3.799334 |
| POCOL4; PO | 0 | 0.9672 | 629.9689 | 1887.892 | 3.86  | 0.00243  | 21.66053 |
| POCOL4; PO | 0 | 1      | 723.0315 | 2167.08  | 1.69  | 0.00122  | 1.818813 |
| POCOL4; PO | 0 | 0.7586 | 669.8612 | 1338.715 | 0.5   | 0.00034  | 6.654665 |
| POCOL4; PO | 0 | 0.9747 | 854.4799 | 1707.952 | 0.85  | 0.00072  | 3.551121 |
| POCOL4; PO | 0 | 1      | 569.9898 | 1707.955 | 2.16  | 0.00123  | 5.385142 |

|            |   |        |          |          |      |         |          |
|------------|---|--------|----------|----------|------|---------|----------|
| POCOL4; PO | 0 | 0.9722 | 568.9744 | 1704.909 | 2.28 | 0.00129 | 5.693548 |
| POCOL4; PO | 0 | 1      | 568.9751 | 1704.911 | 3.56 | 0.00203 | 9.272164 |
| POCOL4; PO | 0 | 0.9672 | 852.9576 | 1704.908 | 1.96 | 0.00167 | 6.551302 |
| POCOL4; PO | 0 | 1      | 568.9751 | 1704.911 | 3.56 | 0.00203 | 13.15989 |
| POCOL4; PO | 0 | 1      | 782.4294 | 1563.851 | 1.63 | 0.00128 | 0        |
| POCOL4; PO | 0 | 0.9474 | 568.9741 | 1704.908 | 1.85 | 0.00105 | 3.56933  |
| POCOL4; PO | 0 | 0.9184 | 852.9573 | 1704.907 | 1.53 | 0.00131 | 6.473444 |
| POCOL4; PO | 0 | 0.9362 | 780.9066 | 1560.806 | 2.07 | 0.00162 | 7.603855 |
| POCOL4; PO | 0 | 1      | 568.9749 | 1704.91  | 3.14 | 0.00178 | 9.686429 |
| POCOL4; PO | 0 | 0.9762 | 568.975  | 1704.911 | 3.46 | 0.00196 | 10.09111 |
| POCOL4; PO | 0 | 1      | 816.5032 | 1631.999 | 1    | 0.00082 | 10.48337 |
| POCOL4; PO | 0 | 0.9677 | 790.4136 | 2369.226 | 2.43 | 0.00192 | 6.811904 |
| POCOL4; PO | 0 | 1      | 481.9554 | 1443.852 | 3.52 | 0.0017  | 0        |
| POCOL4; PO | 0 | 0.7714 | 737.9129 | 1474.819 | 1.17 | 0.00086 | 4.098854 |
| POCOL4; PO | 0 | 0.9333 | 492.2779 | 1474.819 | 1.57 | 0.00077 | 5.518109 |
| POCOL4     | 0 | 0.9878 | 828.4674 | 1655.927 | 1.66 | 0.00137 | 22.2522  |
| POCOL4; PO | 0 | 0.9157 | 542.9428 | 1626.814 | 1.02 | 0.00056 | 0.859662 |
| POCOL4; PO | 0 | 1      | 763.4246 | 2288.259 | 1.75 | 0.00134 | 30.67124 |
| POCOL4; PO | 1 | 0.9677 | 621.8533 | 2484.391 | 2.4  | 0.00149 | 4.806307 |
| POCOL4; PO | 0 | 1      | 592.3666 | 1775.085 | 2.33 | 0.00138 | 3.065492 |
| POCOL4; PO | 0 | 1      | 791.7968 | 2373.376 | 0.63 | 0.0005  | 7.553562 |
| POCOL4; PO | 0 | 0.875  | 594.0998 | 2373.377 | 1.24 | 0.00074 | 27.68506 |
| POCOL4; PO | 0 | 0.7143 | 474.583  | 1421.734 | 3.31 | 0.00157 | 25.12729 |
| POCOL4; PO | 0 | 0.988  | 711.371  | 1421.735 | 3.6  | 0.00256 | 7.464592 |
| POCOL4; PO | 0 | 0.9434 | 474.5831 | 1421.735 | 3.5  | 0.00166 | 9.031528 |
| POCOL4; PO | 0 | 1      | 619.5472 | 3093.707 | 1.91 | 0.00118 | 20.76154 |
| POCOL4; PO | 0 | 0.9189 | 442.9264 | 1326.765 | 1.94 | 0.00086 | 9.391974 |
| POCOL4; PO | 0 | 0.9737 | 569.9888 | 1707.952 | 0.45 | 0.00025 | 31.71992 |
| POCOL4; PO | 0 | 0.8736 | 663.8861 | 1326.765 | 2.25 | 0.00149 | 5.722034 |
| POCOL4; PO | 0 | 0.625  | 442.9256 | 1326.762 | 0.28 | 0.00012 | 9.223516 |
| POCOL4; PO | 0 | 1      | 774.1818 | 3093.705 | 1.4  | 0.00108 | 3.361939 |
| POCOL4; PO | 0 | 0.8333 | 442.9268 | 1326.766 | 2.83 | 0.00125 | 22.21581 |
| POCOL4; PO | 0 | 0.7561 | 442.9264 | 1326.765 | 2.01 | 0.00089 | 0        |
| POCOL4; PO | 0 | 0.8197 | 492.2781 | 1474.82  | 1.88 | 0.00092 | 42.95472 |
| POCOL4; PO | 0 | 0.8627 | 641.3524 | 1281.698 | 3.65 | 0.00234 | 12.25893 |
| POCOL4; PO | 0 | 1      | 639.3195 | 1277.632 | 3.15 | 0.00201 | 5.319107 |
| POCOL4; PO | 0 | 0.8889 | 562.6464 | 1685.925 | 3.27 | 0.00184 | 32.79515 |
| POCOL4; PO | 0 | 1      | 598.7885 | 1196.57  | 2.7  | 0.00162 | 4.36656  |
| POCOL4; PO | 0 | 1      | 598.7878 | 1196.568 | 1.68 | 0.00101 | 3.423467 |
| POCOL4; PO | 0 | 1      | 744.4514 | 1487.895 | 0.04 | 0.00003 | 14.81127 |
| POCOL4; PO | 0 | 1      | 644.3508 | 2574.381 | 0.99 | 0.00064 | 0.879733 |
| POCOL4; PO | 0 | 1      | 598.7885 | 1196.57  | 2.7  | 0.00162 | 3.088728 |
| POCOL4; PO | 0 | 1      | 598.7882 | 1196.569 | 2.3  | 0.00137 | 3.379773 |
| POCOL4; PO | 0 | 1      | 516.6178 | 1547.839 | 3.04 | 0.00157 | 8.099505 |
| POCOL4; PO | 1 | 0.8889 | 518.6359 | 1553.893 | 2.02 | 0.00105 | 11.67609 |
| POCOL4; PO | 1 | 0.92   | 518.6356 | 1553.892 | 1.55 | 0.0008  | 20.36515 |
| POCOL4; PO | 0 | 0.8654 | 641.3528 | 1281.698 | 4.22 | 0.00271 | 36.5496  |
| POCOL4; PO | 0 | 1      | 598.7875 | 1196.568 | 1.07 | 0.00064 | 3.110818 |
| POCOL4; PO | 0 | 1      | 598.789  | 1196.571 | 3.62 | 0.00217 | 0        |
| POCOL4; PO | 0 | 1      | 598.7886 | 1196.57  | 3.01 | 0.0018  | 3.209586 |
| POCOL4; PO | 0 | 1      | 598.7885 | 1196.57  | 2.7  | 0.00162 | 3.526876 |
| POCOL4; PO | 0 | 0.9508 | 636.3505 | 1271.694 | 2.27 | 0.00144 | 100      |



|            |   |        |          |          |      |         |          |
|------------|---|--------|----------|----------|------|---------|----------|
| POCOL4; PO | 0 | 1      | 919.8451 | 2757.521 | 1.91 | 0.00175 | 5.724564 |
| POCOL4; PO | 0 | 0.9091 | 581.1309 | 2901.626 | 2.74 | 0.00159 | 4.158038 |
| POCOL4; PO | 0 | 1      | 680.3757 | 2718.481 | 0.04 | 0.00002 | 2.192481 |
| POCOL4; PO | 0 | 1      | 544.5027 | 2718.484 | 1.31 | 0.00071 | 3.460773 |
| POCOL4; PO | 0 | 1      | 680.3768 | 2718.485 | 1.65 | 0.00112 | 2.076645 |
| POCOL4; PO | 0 | 1      | 1029.58  | 3086.725 | 2.5  | 0.00258 | 3.345291 |
| POCOL4; PO | 0 | 1      | 772.4356 | 3086.721 | 1.21 | 0.00094 | 5.352506 |
| POCOL4; PO | 0 | 0.9778 | 568.975  | 1704.911 | 3.46 | 0.00196 | 8.411469 |
| POCOL4; PO | 0 | 1      | 865.6581 | 4324.262 | 2.09 | 0.00181 | 2.478431 |
| POCOL4; PO | 0 | 1      | 568.975  | 1704.911 | 3.46 | 0.00196 | 11.15509 |
| POCOL4; PO | 0 | 0.975  | 568.9753 | 1704.911 | 3.99 | 0.00227 | 10.76766 |
| POCOL4; PO | 0 | 0.9574 | 568.9755 | 1704.912 | 4.32 | 0.00245 | 12.43042 |
| POCOL4; PO | 0 | 1      | 1081.82  | 4324.259 | 1.58 | 0.00171 | 2.319621 |
| POCOL4; PO | 0 | 1      | 568.975  | 1704.91  | 3.35 | 0.0019  | 8.388101 |
| POCOL4; PO | 0 | 1      | 568.975  | 1704.91  | 3.35 | 0.0019  | 7.974552 |
| POCOL4; PO | 0 | 0.7067 | 610.3615 | 1219.716 | 1.65 | 0.00101 | 18.36178 |
| POCOL4; PO | 0 | 0.7015 | 662.3806 | 1323.754 | 2.18 | 0.00145 | 5.777752 |
| POCOL4; PO | 0 | 1      | 974.8261 | 2922.464 | 1.18 | 0.00115 | 2.592923 |
| POCOL4; PO | 0 | 0.9846 | 1136.634 | 2272.262 | 0.5  | 0.00057 | 0        |
| POCOL4     | 0 | 0.7636 | 577.3285 | 1153.65  | 3.62 | 0.00209 | 5.31738  |
| POCOL4; PO | 0 | 1      | 763.3895 | 1525.772 | 0.61 | 0.00047 | 8.361775 |
| POCOL4; PO | 0 | 0.8571 | 691.3391 | 1381.671 | 1.48 | 0.00102 | 0        |
| POCOL4; PO | 0 | 0.9121 | 758.0922 | 2272.262 | 0.68 | 0.00052 | 3.574229 |
| POCOL4; PO | 1 | 0.697  | 470.6018 | 1409.791 | 2.15 | 0.00101 | 16.73803 |
| POCOL4; PO | 0 | 0.9931 | 1314.205 | 2627.403 | 0.96 | 0.00127 | 0        |
| POCOL4; PO | 0 | 1      | 729.1823 | 2913.707 | 0.96 | 0.0007  | 7.451555 |
| POCOL4; PO | 0 | 1      | 971.9078 | 2913.709 | 1.43 | 0.00139 | 3.05197  |
| POCOL4; PO | 0 | 1      | 592.3665 | 1775.085 | 2.02 | 0.0012  | 2.265197 |
| POCOL4; PO | 1 | 0.9048 | 420.9138 | 1260.727 | 0.52 | 0.00022 | 17.07265 |
| POCOL4; PO | 0 | 0.76   | 399.5595 | 1196.664 | 1.81 | 0.00072 | 67.22067 |
| POCOL4; PO | 0 | 0.7143 | 468.5802 | 1403.726 | 2.14 | 0.001   | 12.54043 |
| POCOL4; PO | 0 | 1      | 487.287  | 1459.846 | 3.35 | 0.00163 | 14.59365 |
| POCOL4; PO | 0 | 0.1515 | 433.9207 | 1299.748 | 2.28 | 0.00099 | 19.51768 |
| POCOL4; PO | 0 | 0.8611 | 852.9576 | 1704.908 | 1.96 | 0.00167 | 3.193368 |
| POCOL4; PO | 0 | 0.95   | 463.0204 | 1849.06  | 1.18 | 0.00054 | 18.91823 |
| POCOL4; PO | 0 | 1      | 598.788  | 1196.569 | 1.89 | 0.00113 | 3.521297 |
| POCOL4; PO | 0 | 0.75   | 399.5589 | 1196.662 | 0.43 | 0.00017 | 6.72325  |
| POCOL4     | 0 | 0.9697 | 797.3947 | 1593.782 | 0.63 | 0.0005  | 2.018869 |
| POCOL4; PO | 0 | 0.3429 | 885.9619 | 1770.917 | 1.29 | 0.00114 | 6.470485 |
| POCOL4; PO | 0 | 0.8367 | 629.3591 | 1257.711 | 2.27 | 0.00143 | 10.64508 |
| POCOL4; PO | 0 | 1      | 544.5025 | 2718.483 | 0.97 | 0.00053 | 29.77047 |
| POCOL4; PO | 0 | 0.6286 | 463.0205 | 1849.06  | 1.51 | 0.0007  | 4.319591 |
| POCOL4; PO | 0 | 1      | 399.5279 | 1196.569 | 2.29 | 0.00091 | 48.74908 |
| POCOL4; PO | 0 | 0.6579 | 520.9397 | 1560.805 | 1.24 | 0.00065 | 3.713353 |
| POCOL4; PO | 0 | 0.7436 | 468.5805 | 1403.727 | 2.79 | 0.00131 | 33.81586 |
| POCOL4; PO | 0 | 0.8    | 441.9229 | 1323.754 | 2.36 | 0.00104 | 14.17325 |
| POCOL4; PO | 0 | 0.8421 | 669.8644 | 1338.722 | 5.43 | 0.00363 | 17.00924 |
| POCOL4; PO | 0 | 0.75   | 520.9398 | 1560.805 | 1.36 | 0.00071 | 4.419956 |
| POCOL4; PO | 0 | 0.8182 | 409.8979 | 1227.679 | 3.48 | 0.00142 | 32.31134 |
| POCOL4; PO | 0 | 1      | 899.1001 | 2695.286 | 2.5  | 0.00224 | 4.423165 |
| POCOL4; PO | 0 | 0.9444 | 636.3513 | 1271.695 | 3.61 | 0.0023  | 100      |
| POCOL4; PO | 0 | 0.9268 | 852.9576 | 1704.908 | 1.96 | 0.00167 | 6.797606 |

|            |   |        |          |          |       |          |          |
|------------|---|--------|----------|----------|-------|----------|----------|
| POCOL4; PO | 0 | 1      | 568.974  | 1704.907 | 1.63  | 0.00093  | 24.27141 |
| POCOL4; PO | 1 | 1      | 421.0057 | 1681.001 | 0.65  | 0.00027  | 15.98904 |
| POCOL4; PO | 0 | 1      | 542.2906 | 1083.574 | 1.04  | 0.00056  | 0        |
| POCOL4; PO | 0 | 0.9535 | 602.325  | 1203.643 | 2.68  | 0.00161  | 4.264612 |
| POCOL4; PO | 0 | 0.8667 | 662.0068 | 1984.006 | 1.22  | 0.00081  | 0        |
| POCOL4; PO | 0 | 0.9714 | 569.99   | 1707.955 | 2.59  | 0.00147  | 14.00191 |
| POCOL4; PO | 1 | 1      | 538.2952 | 1612.871 | 1.6   | 0.00086  | 41.40491 |
| POCOL4; PO | 0 | 1      | 689.3657 | 1377.724 | 1.73  | 0.00119  | 2.458498 |
| POCOL4; PO | 0 | 0.9375 | 662.006  | 1984.004 | 0.02  | 0.00001  | 83.18974 |
| POCOL4; PO | 0 | 1      | 399.8803 | 1197.626 | 2.59  | 0.00104  | 7.288148 |
| POCOL4; PO | 0 | 1      | 626.8574 | 1252.708 | 1.42  | 0.00089  | 4.032603 |
| POCOL4; PO | 1 | 1      | 714.0414 | 2140.11  | 2.31  | 0.00165  | 12.5119  |
| POCOL4; PO | 0 | 1      | 399.5277 | 1196.569 | 1.9   | 0.00076  | 51.43059 |
| POCOL4; PO | 1 | 0.8485 | 418.0077 | 1669.009 | 2.36  | 0.00098  | 17.26229 |
| POCOL4; PO | 0 | 1      | 409.8975 | 1227.678 | 2.59  | 0.00106  | 43.0858  |
| POCOL4; PO | 0 | 0.7619 | 399.5596 | 1196.664 | 2.27  | 0.0009   | 39.83864 |
| POCOL4; PO | 1 | 0.7556 | 806.9397 | 1612.872 | 2.21  | 0.00178  | 5.22815  |
| POCOL4; PO | 0 | 0.7895 | 698.9085 | 1396.81  | 1.35  | 0.00095  | 17.07978 |
| POCOL4; PO | 0 | 0.871  | 852.9581 | 1704.909 | 2.53  | 0.00216  | 8.635193 |
| POCOL4; PO | 0 | 0.4444 | 476.2759 | 1426.813 | -0.25 | -0.00012 | 11.83178 |
| POCOL4; PO | 0 | 0.9512 | 780.9061 | 1560.805 | 1.53  | 0.00119  | 10.07023 |
| POCOL4; PO | 1 | 1      | 459.2541 | 1833.994 | 3.3   | 0.00151  | 22.44029 |
| POCOL4; PO | 0 | 1      | 906.833  | 2718.484 | 1.37  | 0.00124  | 2.811582 |
| POCOL4; PO | 0 | 1      | 610.6805 | 1830.027 | 3.27  | 0.00199  | 9.225146 |
| POCOL4; PO | 0 | 1      | 410.9166 | 1230.735 | 2.08  | 0.00085  | 37.53095 |
| POCOL4; PO | 0 | 0.76   | 590.3304 | 1179.654 | 3.91  | 0.00231  | 0        |
| POCOL4; PO | 0 | 0.7759 | 492.2392 | 983.4711 | 1.79  | 0.00088  | 0        |
| POCOL4; PO | 0 | 0.8974 | 813.9114 | 1626.816 | 2.08  | 0.00169  | 11.69149 |
| POCOL4; PO | 1 | 1      | 535.7828 | 2140.11  | 2.28  | 0.00122  | 34.20444 |
| POCOL4; PO | 0 | 0.9062 | 542.9431 | 1626.815 | 1.47  | 0.0008   | 3.061351 |
| POCOL4; PO | 1 | 1      | 476.6142 | 1427.828 | 2.2   | 0.00105  | 38.80282 |
| POCOL4; PO | 0 | 0.4286 | 466.2755 | 1396.812 | 2.96  | 0.00138  | 7.190145 |
| POCOL4; PO | 1 | 0.6957 | 592.8262 | 2368.283 | 2.89  | 0.00171  | 0        |
| POCOL4; PO | 0 | 0.5312 | 814.434  | 1627.861 | 2.25  | 0.00183  | 10.15128 |
| POCOL4; PO | 0 | 0.9583 | 401.8856 | 1203.642 | 2.41  | 0.00097  | 13.84584 |
| POCOL4; PO | 0 | 0.7368 | 411.8785 | 1233.621 | 1.01  | 0.00042  | 5.811368 |
| POCOL4; PO | 0 | 0.8222 | 511.3119 | 1021.617 | 3.26  | 0.00167  | 36.4212  |
| POCOL4; PO | 0 | 1      | 401.8854 | 1203.642 | 1.88  | 0.00075  | 27.42783 |
| POCOL4; PO | 0 | 0.8667 | 511.3113 | 1021.615 | 2.13  | 0.00109  | 7.841673 |
| POCOL4; PO | 0 | 0.75   | 424.5696 | 1271.694 | 2.83  | 0.0012   | 14.03217 |
| POCOL4; PO | 0 | 0.8571 | 409.8972 | 1227.677 | 1.77  | 0.00072  | 37.2449  |
| POCOL4; PO | 1 | 1      | 420.9137 | 1260.727 | 0.3   | 0.00013  | 29.13715 |
| POCOL4; PO | 0 | 1      | 899.0994 | 2695.284 | 1.75  | 0.00157  | 71.5943  |
| POCOL4; PO | 0 | 0.9286 | 1348.146 | 2695.286 | 2.48  | 0.00334  | 0        |
| POCOL4; PO | 0 | 0.5714 | 466.2754 | 1396.812 | 2.76  | 0.00129  | 0        |
| POCOL4; PO | 0 | 0.9556 | 665.8625 | 1330.718 | 2.22  | 0.00148  | 3.229429 |
| POCOL4; PO | 0 | 0.9259 | 441.9233 | 1323.755 | 3.26  | 0.00144  | 36.00274 |
| POCOL4; PO | 0 | 0.7963 | 439.2596 | 877.512  | 1.03  | 0.00045  | 5.101516 |
| POCOL4; PO | 0 | 0.9355 | 575.6501 | 1724.936 | 2.8   | 0.00161  | 12.00104 |
| POCOL4; PO | 0 | 1      | 598.7882 | 1196.569 | 2.3   | 0.00137  | 13.70312 |
| POCOL4; PO | 1 | 1      | 501.5902 | 1502.756 | 1.24  | 0.00062  | 0        |
| POCOL4; PO | 0 | 0.7805 | 780.9072 | 1560.807 | 2.85  | 0.00223  | 17.75122 |

|            |   |        |          |          |       |          |          |
|------------|---|--------|----------|----------|-------|----------|----------|
| POCOL4; PO | 1 | 1      | 592.8243 | 2368.276 | -0.21 | -0.00012 | 3.518496 |
| POCOL4; PO | 1 | 0.8421 | 538.2929 | 1612.864 | -2.83 | -0.00152 | 86.75069 |
| POCOL4; PO | 1 | 0.9474 | 577.6785 | 1731.021 | 1.22  | 0.0007   | 39.13348 |
| POCOL4; PO | 0 | 0.7073 | 407.2438 | 1219.717 | 2.74  | 0.00111  | 40.93847 |
| POCOL4; PO | 0 | 0.9    | 680.3768 | 2718.485 | 1.74  | 0.00118  | 0        |
| POCOL4; PO | 0 | 0.7736 | 527.2651 | 1053.523 | 1.79  | 0.00094  | 31.35412 |
| POCOL4; PO | 1 | 0.9412 | 508.9726 | 1524.903 | 0.28  | 0.00014  | 40.52543 |
| POCOL4; PO | 1 | 0.9412 | 508.9726 | 1524.903 | 0.28  | 0.00014  | 40.52543 |
| POCOL4; PO | 1 | 0.8056 | 835.0076 | 1669.008 | 1.86  | 0.00155  | 6.720405 |
| POCOL4; PO | 0 | 0.5667 | 424.5695 | 1271.694 | 2.47  | 0.00105  | 16.01746 |
| POCOL4; PO | 1 | 0.7143 | 518.6358 | 1553.893 | 1.9   | 0.00098  | 18.45007 |
| POCOL4; PO | 0 | 0.95   | 548.3139 | 1095.621 | 2.33  | 0.00128  | 4.190257 |
| POCOL4; PO | 1 | 1      | 535.7826 | 2140.109 | 1.82  | 0.00097  | 23.43074 |
| POCOL4; PO | 0 | 1      | 526.7361 | 1052.465 | 0.53  | 0.00028  | 0        |
| POCOL4; PO | 0 | 0.9091 | 458.2622 | 1830.027 | 3.3   | 0.00151  | 38.84898 |
| POCOL4; PO | 0 | 0.2727 | 586.3351 | 1756.991 | 2.41  | 0.00141  | 7.217451 |
| POCOL4; PO | 0 | 0.8571 | 511.3111 | 1021.615 | 1.65  | 0.00084  | 7.670605 |
| POCOL4; PO | 0 | 0.6977 | 629.3596 | 1257.712 | 2.95  | 0.00185  | 5.895948 |
| POCOL4; PO | 0 | 0.7551 | 554.8356 | 1108.664 | 3.08  | 0.0017   | 11.00247 |
| POCOL4; PO | 0 | 1      | 617.3145 | 1233.622 | 1.64  | 0.00101  | 8.660937 |
| POCOL4     | 0 | 0.3    | 1092.866 | 3276.583 | 3.61  | 0.00394  | 2.290275 |
| POCOL4; PO | 0 | 0.7838 | 554.8355 | 1108.664 | 2.86  | 0.00158  | 35.13182 |
| POCOL4; PO | 0 | 1      | 602.3248 | 1203.642 | 2.37  | 0.00143  | 6.424095 |
| POCOL4; PO | 1 | 0.9    | 630.8679 | 1260.729 | 1.84  | 0.00116  | 7.584723 |
| POCOL4; PO | 0 | 0.7143 | 722.4279 | 1443.848 | 1.27  | 0.00092  | 6.84609  |
| POCOL4; PO | 0 | 1      | 598.7878 | 1196.568 | 1.58  | 0.00095  | 6.408106 |
| POCOL4; PO | 0 | 0.9032 | 419.9082 | 1257.71  | 1.53  | 0.00064  | 17.20947 |
| POCOL4; PO | 0 | 0.8444 | 630.3146 | 1259.622 | 0.64  | 0.0004   | 2.893304 |
| POCOL4; PO | 0 | 0.8571 | 560.293  | 1119.579 | 2.17  | 0.00122  | 6.93324  |
| POCOL4; PO | 0 | 0.9487 | 607.3416 | 1213.676 | 3.03  | 0.00184  | 21.54747 |
| POCOL4; PO | 0 | 1      | 904.4326 | 2711.283 | 3.39  | 0.00306  | 0        |
| POCOL4; PO | 0 | 1      | 610.6796 | 1830.024 | 1.77  | 0.00108  | 0        |
| POCOL4; PO | 0 | 0.9583 | 590.9792 | 1770.923 | 4.93  | 0.00291  | 0        |
| POCOL4; PO | 0 | 0.8723 | 492.2389 | 983.4705 | 1.17  | 0.00058  | 11.76828 |
| POCOL4; PO | 0 | 1      | 852.9577 | 1704.908 | 2.03  | 0.00173  | 6.600808 |
| POCOL4; PO | 0 | 0.7368 | 511.3101 | 1021.613 | -0.2  | -0.0001  | 30.00844 |
| POCOL4; PO | 0 | 1      | 598.7905 | 1196.574 | 3.61  | 0.00216  | 0        |
| POCOL4; PO | 0 | 0.9697 | 399.5274 | 1196.568 | 1.14  | 0.00045  | 11.45088 |
| POCOL4; PO | 0 | 1      | 526.7377 | 1052.468 | 3.67  | 0.00193  | 0        |
| POCOL4; PO | 1 | 1      | 493.3085 | 1477.911 | 1.12  | 0.00055  | 42.24174 |
| POCOL4; PO | 1 | 0.75   | 592.8261 | 2368.282 | 2.68  | 0.00159  | 11.49942 |
| POCOL4; PO | 1 | 1      | 697.4254 | 2090.262 | 1.52  | 0.00106  | 33.36861 |
| POCOL4; PO | 0 | 0.8235 | 560.2942 | 1119.581 | 4.35  | 0.00244  | 15.10129 |
| POCOL4; PO | 0 | 1      | 806.3716 | 2417.1   | 0.9   | 0.00072  | 0        |
| POCOL4; PO | 0 | 0.9474 | 560.296  | 1119.585 | 7.52  | 0.00421  | 0        |
| POCOL4; PO | 0 | 0.8611 | 774.425  | 1547.843 | 5.53  | 0.00428  | 27.70102 |
| POCOL4; PO | 0 | 0.9778 | 488.7217 | 976.436  | 1.51  | 0.00074  | 25.58318 |
| POCOL4; PO | 0 | 0.75   | 554.8341 | 1108.661 | 0.43  | 0.00024  | 100      |
| POCOL4; PO | 0 | 0.8684 | 560.2941 | 1119.581 | 4.24  | 0.00238  | 2.274849 |
| POCOL4; PO | 0 | 0.9348 | 492.2383 | 983.4694 | 0.05  | 0.00003  | 16.58234 |
| POCOL4; PO | 0 | 0.7941 | 560.2938 | 1119.58  | 3.7   | 0.00207  | 0        |
| POCOL4; PO | 0 | 1      | 687.9223 | 1374.837 | 1.89  | 0.0013   | 5.978024 |

|            |   |        |          |          |       |          |          |
|------------|---|--------|----------|----------|-------|----------|----------|
| POCOL4; PO | 1 | 0.9583 | 403.9734 | 1612.872 | 1.97  | 0.00079  | 21.62358 |
| POCOL4; PO | 0 | 0.8545 | 554.8359 | 1108.664 | 3.63  | 0.00201  | 18.59108 |
| POCOL4; PO | 1 | 0.8333 | 456.9215 | 1368.75  | 1.77  | 0.00081  | 16.56412 |
| POCOL4; PO | 0 | 0.9091 | 482.7832 | 964.5591 | 0.7   | 0.00034  | 44.7948  |
| POCOL4; PO | 0 | 0.8421 | 525.8064 | 1050.606 | 2.08  | 0.00109  | 11.52102 |
| POCOL4; PO | 1 | 0.9    | 420.9141 | 1260.728 | 1.18  | 0.00049  | 37.17281 |
| POCOL4; PO | 0 | 0.7353 | 458.9526 | 1374.843 | 6.07  | 0.00278  | 39.229   |
| POCOL4; PO | 0 | 1      | 562.8051 | 1124.603 | 2.27  | 0.00128  | 11.01421 |
| POCOL4; PO | 0 | 1      | 482.756  | 964.5048 | 1.57  | 0.00076  | 11.29565 |
| POCOL4; PO | 0 | 0.9375 | 598.8365 | 1196.666 | 3.4   | 0.00203  | 16.29111 |
| POCOL4; PO | 0 | 0.9524 | 742.382  | 1483.757 | 1.16  | 0.00086  | 0        |
| POCOL4; PO | 0 | 0.8293 | 557.8166 | 1114.626 | 3.95  | 0.0022   | 13.47637 |
| POCOL4; PO | 0 |        | 586.3353 | 1756.991 | 2.72  | 0.00159  | 0        |
| POCOL4; PO | 0 | 1      | 399.5279 | 1196.569 | 2.21  | 0.00088  | 12.98866 |
| POCOL4; PO | 0 | 0.76   | 544.6714 | 1632     | 1.33  | 0.00072  | 8.001515 |
| POCOL4; PO | 0 | 0.9048 | 617.0269 | 1849.066 | 4.75  | 0.00293  | 29.99261 |
| POCOL4; PO | 0 | 1      | 458.9506 | 1374.837 | 1.88  | 0.00086  | 44.57616 |
| POCOL4; PO | 0 | 0.8684 | 525.806  | 1050.605 | 1.38  | 0.00072  | 21.83972 |
| POCOL4; PO | 0 | 1      | 447.5626 | 1340.673 | 1.2   | 0.00053  | 25.67226 |
| POCOL4; PO | 0 | 0      | 634.3692 | 1901.093 | 2.28  | 0.00145  | 16.75078 |
| POCOL4     | 0 | 0.9259 | 1044.829 | 3132.473 | 1.28  | 0.00134  | 0.680275 |
| POCOL4; PO | 0 | 0.9677 | 560.2945 | 1119.582 | 4.9   | 0.00274  | 0        |
| POCOL4; PO | 0 | 0.4    | 599.3169 | 1197.627 | 2.78  | 0.00167  | 3.641306 |
| POCOL4; PO | 0 | 0.8846 | 542.9433 | 1626.815 | 1.92  | 0.00104  | 5.438027 |
| POCOL4; PO | 0 | 0.6061 | 407.2438 | 1219.717 | 2.59  | 0.00105  | 13.25358 |
| POCOL4; PO | 1 | 1      | 714.0369 | 2140.096 | -3.93 | -0.00281 | 34.70642 |
| POCOL4; PO | 1 | 0.8125 | 621.8536 | 2484.393 | 2.99  | 0.00186  | 41.53924 |
| POCOL4; PO | 1 | 1      | 420.915  | 1260.73  | 3.21  | 0.00135  | 58.33232 |
| POCOL4; PO | 0 | 1      | 458.9503 | 1374.836 | 1.08  | 0.00049  | 76.27785 |
| POCOL4; PO | 0 | 1      | 548.3137 | 1095.62  | 2     | 0.0011   | 0        |
| POCOL4; PO | 0 | 0.75   | 419.9087 | 1257.711 | 2.62  | 0.0011   | 4.821672 |
| POCOL4; PO | 0 | 0.76   | 862.9706 | 1724.934 | 1.82  | 0.00157  | 43.96324 |
| POCOL4; PO | 0 | 1      | 674.577  | 2695.286 | 2.61  | 0.00176  | 0        |
| POCOL4; PO | 1 | 0.8    | 420.9142 | 1260.728 | 1.47  | 0.00062  | 30.87623 |
| POCOL4; PO | 0 | 1      | 730.4273 | 1459.847 | 3.99  | 0.00291  | 8.528147 |
| POCOL4; PO | 0 | 0.25   | 576.7958 | 2304.161 | 2.44  | 0.0014   | 29.14127 |
| POCOL4; PO | 0 | 0.9118 | 525.8063 | 1050.605 | 1.96  | 0.00103  | 3.130056 |
| POCOL4; PO | 0 | 1      | 780.9059 | 1560.805 | 1.29  | 0.00101  | 13.83405 |
| POCOL4; PO | 0 | 0.92   | 568.9929 | 1704.964 | 5.19  | 0.00295  | 8.115194 |
| POCOL4; PO | 0 | 0.7586 | 419.9086 | 1257.711 | 2.55  | 0.00107  | 46.55788 |
| POCOL4; PO | 0 | 1      | 542.291  | 1083.575 | 1.72  | 0.00093  | 6.112218 |
| POCOL4; PO | 0 | 0.9375 | 1064.557 | 2128.107 | 0.65  | 0.00069  | 0        |
| POCOL4; PO | 0 | 1      | 629.9681 | 1887.89  | 2.5   | 0.00157  | 78.46582 |
| POCOL4; PO | 0 | 1      | 562.8051 | 1124.603 | 2.38  | 0.00134  | 0        |
| POCOL4; PO | 0 | 1      | 548.3141 | 1095.621 | 2.67  | 0.00146  | 0        |
| POCOL4; PO | 0 | 1      | 568.9743 | 1704.908 | 2.17  | 0.00123  | 0        |
| POCOL4; PO | 1 | 1      | 421.0075 | 1681.008 | 4.86  | 0.00204  | 58.07848 |
| POCOL4; PO | 0 | 1      | 590.9782 | 1770.92  | 3.17  | 0.00187  | 0        |
| POCOL4; PO | 0 | 0.6207 | 630.3162 | 1259.625 | 3.25  | 0.00205  | 9.959315 |
| POCOL4; PO | 0 | 1      | 665.8615 | 1330.716 | 0.75  | 0.0005   | 0        |
| POCOL4; PO | 0 | 1      | 639.3193 | 1277.631 | 2.87  | 0.00183  | 14.56757 |
| PO2655     | 0 | 0.8592 | 662.3746 | 1323.742 | 1.54  | 0.00102  | 14.8714  |

|        |   |        |          |          |       |          |          |
|--------|---|--------|----------|----------|-------|----------|----------|
| P02655 | 0 | 0.6415 | 441.919  | 1323.742 | 1.92  | 0.00085  | 10.41497 |
| P02655 | 0 | 0.8462 | 662.3749 | 1323.743 | 2.09  | 0.00139  | 5.537033 |
| P02655 | 0 | 0.8226 | 663.3707 | 1325.734 | 2.91  | 0.00193  | 13.41453 |
| P02655 | 0 | 0.7872 | 442.5827 | 1325.734 | 2.44  | 0.00108  | 15.04031 |
| P02655 | 0 | 0.8113 | 663.3702 | 1325.733 | 2.17  | 0.00144  | 28.09119 |
| P02655 | 0 | 1      | 590.324  | 1179.641 | 2.57  | 0.00151  | 4.025693 |
| P02655 | 0 | 0.7966 | 662.3749 | 1323.742 | 2     | 0.00133  | 7.405938 |
| P02655 | 0 | 0.8923 | 715.8507 | 1430.694 | 1.42  | 0.00102  | 27.43355 |
| P02655 | 0 | 0.7925 | 525.6036 | 1574.796 | 1.47  | 0.00077  | 14.19712 |
| P02655 | 0 | 1      | 841.1215 | 2521.35  | 1.44  | 0.00121  | 4.876062 |
| P02655 | 0 | 1      | 1261.179 | 2521.35  | 1.67  | 0.0021   | 0        |
| P02655 | 0 | 1      | 787.9017 | 1574.796 | 1.36  | 0.00107  | 6.65253  |
| P02655 | 0 | 1      | 787.9021 | 1574.797 | 1.82  | 0.00144  | 2.586982 |
| P02655 | 0 | 0.7963 | 525.6037 | 1574.797 | 1.58  | 0.00083  | 9.362435 |
| P02655 | 0 | 0.8108 | 442.5823 | 1325.732 | 1.47  | 0.00065  | 40.79031 |
| P02655 | 0 | 0.8049 | 662.3783 | 1323.749 | 7.17  | 0.00474  | 0        |
| P02655 | 0 | 0.5185 | 441.9187 | 1323.742 | 1.37  | 0.0006   | 10.65978 |
| P02655 | 0 | 0.8788 | 591.3184 | 1181.629 | 1     | 0.00059  | 32.11076 |
| P02655 | 0 | 0.1429 | 525.6038 | 1574.797 | 1.82  | 0.00095  | 4.033875 |
| P02655 | 0 | 0.68   | 394.548  | 1181.63  | 1.09  | 0.00043  | 6.971853 |
| P02655 | 0 | 0.6207 | 662.3726 | 1323.738 | -1.41 | -0.00093 | 18.63087 |
| P02655 | 0 | 0.8571 | 631.0933 | 2521.351 | 2.09  | 0.00132  | 5.803618 |
| P02745 | 1 | 1      | 687.1086 | 2745.413 | 0.04  | 0.00003  | 2.423619 |
| P02745 | 1 | 1      | 915.8117 | 2745.421 | 2.89  | 0.00265  | 17.71249 |
| P02745 | 0 | 1      | 825.0776 | 2473.218 | 1.04  | 0.00086  | 2.767003 |
| P02745 | 0 | 0.9825 | 978.5327 | 2933.584 | 1.32  | 0.00129  | 4.815495 |
| P02745 | 0 | 1      | 477.5781 | 1430.72  | 0.67  | 0.00032  | 42.39591 |
| P35542 | 0 | 1      | 638.827  | 1276.647 | 2.49  | 0.00159  | 3.479472 |
| P35542 | 0 | 0.8125 | 565.8333 | 1130.659 | 2.82  | 0.00159  | 6.147806 |
| P35542 | 0 | 1      | 431.5523 | 1292.642 | 2.98  | 0.00129  | 26.02918 |
| P35542 | 0 | 1      | 566.7759 | 1132.545 | 2.71  | 0.00154  | 10.89101 |
| P35542 | 0 | 1      | 638.8268 | 1276.646 | 2.11  | 0.00135  | 3.803209 |
| P35542 | 0 | 1      | 646.8243 | 1292.641 | 2.24  | 0.00145  | 0        |
| P35542 | 0 | 1      | 426.2199 | 1276.645 | 1.09  | 0.00047  | 34.71687 |
| P35542 | 0 | 0.6471 | 406.5799 | 1217.725 | 0.63  | 0.00026  | 9.542996 |
| P35542 | 0 | 0.7778 | 406.5803 | 1217.726 | 1.46  | 0.00059  | 11.04507 |
| P35542 | 0 | 0.8    | 377.5574 | 1130.658 | 1.51  | 0.00057  | 30.16945 |
| P35542 | 0 | 1      | 519.7589 | 1038.511 | 1.99  | 0.00103  | 25.10227 |
| P35542 | 0 | 0.3636 | 406.5811 | 1217.729 | 3.41  | 0.00139  | 19.70819 |
| P35542 | 0 | 0.6364 | 406.5804 | 1217.727 | 1.91  | 0.00078  | 17.12051 |
| P35542 | 0 | 0.6786 | 565.8326 | 1130.658 | 1.74  | 0.00098  | 42.02954 |
| P35542 | 0 | 0.7097 | 565.8342 | 1130.661 | 4.44  | 0.00251  | 0        |
| P02746 | 0 | 1      | 627.3399 | 1880.005 | 2.56  | 0.0016   | 8.28067  |
| P02746 | 0 | 0.9818 | 627.3401 | 1880.006 | 2.85  | 0.00179  | 10.93156 |
| P02746 | 0 | 0.8545 | 610.8233 | 1220.639 | 2.72  | 0.00166  | 3.670751 |
| P02746 | 0 | 1      | 669.9885 | 2007.951 | 2.34  | 0.00157  | 11.55478 |
| P02746 | 0 | 1      | 602.3099 | 1804.915 | 0.66  | 0.0004   | 31.65663 |
| P02746 | 0 | 0.973  | 538.77   | 1076.533 | -1.1  | -0.00059 | 10.61958 |
| P02746 | 0 | 0.7    | 407.5514 | 1220.64  | 3.04  | 0.00123  | 32.50603 |
| P13727 | 0 | 1      | 464.2411 | 1390.709 | 2.5   | 0.00116  | 15.51724 |
| P13727 | 0 | 1      | 602.3251 | 1804.961 | 1.87  | 0.00112  | 34.83067 |
| P13727 | 0 | 1      | 425.5459 | 1274.623 | 1.42  | 0.0006   | 23.42044 |

|            |   |        |          |          |       |          |          |
|------------|---|--------|----------|----------|-------|----------|----------|
| P13727     | 0 | 0.9259 | 706.3731 | 2117.105 | 0.26  | 0.00018  | 23.72067 |
| P13727     | 0 | 0.9118 | 706.3734 | 2117.106 | 0.69  | 0.00049  | 24.69586 |
| P13727     | 0 | 0.975  | 565.7649 | 1130.523 | 2.79  | 0.00158  | 25.40351 |
| P13727     | 0 | 1      | 695.857  | 1390.707 | 1.12  | 0.00078  | 0        |
| P13727     | 0 | 1      | 377.5117 | 1130.521 | 1.02  | 0.00038  | 14.01315 |
| P04180     | 0 | 1      | 831.645  | 3323.558 | 2.46  | 0.00204  | 20.63034 |
| P04180     | 0 | 0.9219 | 725.8657 | 1450.724 | 0.87  | 0.00063  | 15.96875 |
| P04180     | 0 | 1      | 790.4091 | 1579.811 | 0.93  | 0.00074  | 14.02369 |
| P04180     | 0 | 1      | 1108.526 | 3323.563 | 3.8   | 0.00421  | 0        |
| P04180     | 0 | 0.9412 | 510.2911 | 1528.859 | 1.45  | 0.00074  | 26.58681 |
| P04180     | 0 | 0.5926 | 527.2747 | 1579.81  | 0.15  | 0.00008  | 0        |
| P04180     | 0 | 0.85   | 527.2748 | 1579.81  | 0.27  | 0.00014  | 21.59788 |
| P04180     | 0 | 0.6667 | 510.2898 | 1528.855 | -0.94 | -0.00048 | 47.79652 |
| P08833     | 0 | 1      | 558.9869 | 1674.946 | 3.17  | 0.00177  | 44.31567 |
| P08833     | 0 | 0.9167 | 733.884  | 1466.761 | 2.13  | 0.00156  | 5.571077 |
| P08833     | 0 | 0.9796 | 489.5924 | 1466.763 | 3.41  | 0.00167  | 14.24485 |
| P08833     | 0 | 1      | 489.5916 | 1466.76  | 1.66  | 0.00081  | 0        |
| P08833     | 0 | 1      | 589.7824 | 1178.557 | 3.3   | 0.00194  | 0        |
| P08833     | 0 | 0.9286 | 733.8842 | 1466.761 | 2.3   | 0.00169  | 5.355354 |
| P08833     | 0 | 0.48   | 395.252  | 1183.741 | 1.09  | 0.00043  | 44.81193 |
| P08833     | 0 | 0.9825 | 765.9247 | 1530.842 | 2.21  | 0.00169  | 0        |
| P08833     | 0 | 0.9667 | 489.5909 | 1466.758 | 0.35  | 0.00017  | 59.20386 |
| P08833     | 0 | 0.6    | 517.329  | 1033.651 | 1.09  | 0.00056  | 0        |
| P08833     | 0 | 0.9444 | 558.9865 | 1674.945 | 2.41  | 0.00134  | 31.97291 |
| Q12805     | 0 | 1      | 613.2905 | 1837.857 | 1.1   | 0.00067  | 14.49924 |
| Q12805     | 0 | 1      | 691.9492 | 2073.833 | -3.03 | -0.0021  | 0        |
| Q12805     | 0 | 1      | 734.3211 | 1467.635 | 1.7   | 0.00125  | 3.682209 |
| Q12805     | 0 | 0.9474 | 682.906  | 1364.805 | 1.44  | 0.00099  | 4.025994 |
| Q12805     | 0 | 0.7    | 455.6065 | 1364.805 | 1.68  | 0.00076  | 43.65178 |
| Q12805     | 0 | 1      | 691.9495 | 2073.834 | -2.51 | -0.00173 | 0        |
| Q12805     | 0 | 0.625  | 919.4302 | 1837.853 | -1.05 | -0.00097 | 18.64239 |
| Q12805     | 0 | 0.4737 | 682.9071 | 1364.807 | 3.05  | 0.00208  | 6.377059 |
| P55056     | 0 | 1      | 563.9338 | 1689.787 | 3.33  | 0.00188  | 14.24275 |
| P55056     | 0 | 1      | 563.9336 | 1689.786 | 3     | 0.00169  | 49.68665 |
| P55056     | 0 | 0.64   | 608.8557 | 1216.704 | 1.96  | 0.00119  | 2.6773   |
| P55056     | 0 | 0.7885 | 584.8362 | 1168.665 | 4.07  | 0.00238  | 18.66071 |
| P55056     | 0 | 0.8571 | 584.8353 | 1168.663 | 2.4   | 0.0014   | 17.84568 |
| P55056     | 0 | 0.814  | 584.8357 | 1168.664 | 3.13  | 0.00183  | 8.575201 |
| P55056     | 0 | 0.8261 | 516.3219 | 1031.637 | 2.54  | 0.00131  | 31.48803 |
| P55056     | 0 | 0.8333 | 512.7836 | 1024.56  | 1.43  | 0.00073  | 27.56898 |
| P55056     | 0 | 0.5455 | 390.2254 | 1168.662 | 1.03  | 0.0004   | 4.714448 |
| P01591     | 0 | 1      | 863.8936 | 1726.78  | 0.88  | 0.00076  | 1.313522 |
| P01591     | 0 | 0.9375 | 767.362  | 1533.717 | 1.18  | 0.00091  | 2.645135 |
| P01591     | 0 | 0.8148 | 523.9502 | 1569.836 | 1.46  | 0.00076  | 5.896484 |
| P01591     | 0 | 0.8621 | 511.9097 | 1533.714 | -0.3  | -0.00015 | 9.917511 |
| P01591     | 0 | 0.3023 | 544.8503 | 1088.693 | 1.52  | 0.00083  | 30.48698 |
| P01591     | 0 | 1      | 767.3604 | 1533.713 | -0.96 | -0.00074 | 0        |
| Q7Z794; P3 | 0 | 0.9778 | 588.6707 | 1763.998 | 4.65  | 0.00273  | 64.9304  |
| P35908     | 0 | 0.7234 | 499.6144 | 1496.829 | 5.88  | 0.00294  | 20.98262 |
| P35908     | 0 | 1      | 440.8662 | 1320.584 | 0.95  | 0.00042  | 24.33473 |
| P35908     | 0 | 0.7    | 495.9237 | 1485.756 | 1.95  | 0.00096  | 62.97563 |
| P35908     | 0 | 0.5652 | 560.3561 | 1119.705 | 6.64  | 0.00372  | 5.87361  |

|            |   |        |          |          |       |          |          |
|------------|---|--------|----------|----------|-------|----------|----------|
| Q7Z794; P3 | 0 | 0.5    | 540.6342 | 1619.888 | 0.36  | 0.00019  | 5.406788 |
| P43121     | 0 | 0.7907 | 566.3201 | 1696.946 | 3.45  | 0.00195  | 3.684172 |
| P43121     | 0 | 1      | 581.9853 | 1743.941 | 3.2   | 0.00186  | 10.1243  |
| P43121     | 0 | 0.7692 | 469.9576 | 1407.858 | 1.55  | 0.00073  | 35.11899 |
| P43121     | 0 | 0.4211 | 602.8201 | 1204.633 | 3.21  | 0.00193  | 6.642983 |
| P43121     | 0 | 0.9259 | 872.4731 | 1743.939 | 1.88  | 0.00164  | 11.6148  |
| O43866     | 0 | 1      | 899.379  | 2696.122 | 4.23  | 0.0038   | 0        |
| O43866     | 0 | 0.8333 | 414.8883 | 1242.65  | 0.12  | 0.00005  | 23.7085  |
| O43866     | 0 | 0.9762 | 583.3112 | 1165.615 | 2.26  | 0.00132  | 8.060805 |
| O43866     | 0 | 1      | 611.9738 | 1833.907 | 1.39  | 0.00085  | 49.74887 |
| P32119     | 1 | 1      | 717.7642 | 2151.278 | 1.93  | 0.00139  | 35.17534 |
| Q06830; P3 | 0 | 0.9773 | 678.3939 | 1355.781 | 3.13  | 0.00212  | 7.229448 |
| Q06830; P3 | 0 | 0.7308 | 452.597  | 1355.776 | 0.12  | 0.00006  | 61.50156 |
| P32119     | 0 | 0.871  | 575.8593 | 1150.711 | 3.43  | 0.00197  | 51.97497 |
| P32119     | 0 | 1      | 468.9592 | 1404.863 | 3.89  | 0.00182  | 30.89872 |
| P02741     | 0 | 0.9574 | 703.7158 | 2109.133 | 3.33  | 0.00234  | 7.756295 |
| P02741     | 1 | 0.9688 | 613.017  | 1837.036 | 8.34  | 0.00511  | 29.84011 |
| P02741     | 0 | 0.6129 | 475.5945 | 1424.769 | 1.7   | 0.00081  | 59.3195  |
| P02741     | 0 | 1      | 433.9627 | 1299.874 | 0.9   | 0.00039  | 17.23426 |
| P02741     | 0 | 1      | 712.8859 | 1424.765 | -1.27 | -0.0009  | 41.47656 |
| Q6UX71     | 0 | 0.8205 | 481.6134 | 1442.826 | 1.48  | 0.00071  | 26.74689 |
| Q6UX71     | 0 | 0.9286 | 608.9473 | 1824.827 | -2.19 | -0.00133 | 9.35117  |
| Q6UX71     | 0 | 1      | 429.5543 | 1286.648 | 2.03  | 0.00087  | 0        |
| Q6UX71     | 0 | 1      | 431.2501 | 1291.736 | 0.39  | 0.00017  | 4.652308 |
| Q6UX71     | 0 | 1      | 643.8273 | 1286.647 | 1.31  | 0.00084  | 37.55793 |
| P13796     | 0 | 0.9706 | 625.3565 | 1874.055 | 1.94  | 0.00121  | 14.79839 |
| P13796     | 0 | 1      | 578.8624 | 1156.717 | 0.38  | 0.00022  | 23.36059 |
| P13796     | 0 | 0.5667 | 573.9966 | 1719.975 | 4.75  | 0.00272  | 0        |
| P13796     | 0 | 0.7714 | 480.2501 | 1438.736 | 1.3   | 0.00062  | 0        |
| P63267; P6 | 0 | 0.7826 | 483.9488 | 1449.832 | 6.36  | 0.00307  | 34.84767 |
| P63267; P6 | 0 | 1      | 487.2637 | 1459.777 | 0.94  | 0.00046  | 46.31744 |
| A5A3E0; P6 | 0 | 0.8636 | 645.6713 | 1934.999 | 2.72  | 0.00175  | 55.86254 |
| A5A3E0; Q9 | 0 | 1      | 505.9223 | 1515.752 | 2.11  | 0.00107  | 29.73994 |
| P63267; P6 | 0 | 0.7826 | 483.9488 | 1449.832 | 6.36  | 0.00307  | 34.84767 |
| P63267; P6 | 0 | 1      | 487.2637 | 1459.777 | 0.94  | 0.00046  | 46.31744 |
| A5A3E0; P6 | 0 | 0.8636 | 645.6713 | 1934.999 | 2.72  | 0.00175  | 55.86254 |
| A5A3E0; Q9 | 0 | 1      | 505.9223 | 1515.752 | 2.11  | 0.00107  | 29.73994 |
| O00187     | 0 | 1      | 912.4517 | 1823.896 | 1.91  | 0.00175  | 15.7204  |
| O00187     | 0 | 1      | 632.3079 | 1894.909 | 2.04  | 0.00129  | 16.74776 |
| O00187     | 1 | 1      | 487.9421 | 1461.812 | 2.44  | 0.00119  | 32.54512 |
| O00187     | 0 | 0.913  | 566.3087 | 1131.61  | 2.91  | 0.00165  | 3.02803  |
| P18428     | 0 | 1      | 464.9697 | 1392.895 | 0.48  | 0.00022  | 37.52213 |
| P18428     | 0 | 0.8222 | 696.3854 | 1391.763 | -1.16 | -0.00081 | 29.77236 |
| P18428     | 0 | 1      | 383.8941 | 1149.668 | 2.47  | 0.00094  | 25.23315 |
| P18428     | 0 | 1      | 572.3428 | 1715.014 | 2.55  | 0.00146  | 49.09436 |
| P15144     | 0 | 0.9091 | 671.6872 | 2013.047 | 4.56  | 0.00306  | 0        |
| P15144     | 1 | 1      | 434.9427 | 1302.813 | 2.95  | 0.00128  | 28.25023 |
| P15144     | 1 | 1      | 545.3    | 1633.885 | 2.58  | 0.0014   | 4.215817 |
| P15144     | 1 | 1      | 545.3    | 1633.885 | 2.58  | 0.0014   | 4.215817 |
| P15144     | 0 | 0.7778 | 515.8112 | 1030.615 | 2.41  | 0.00124  | 14.16548 |
| P07996     | 0 | 1      | 647.3102 | 1939.916 | 3.61  | 0.00233  | 14.82577 |
| P07996     | 0 | 0.4524 | 695.9067 | 1390.806 | 2.87  | 0.002    | 27.48921 |

|            |   |        |          |          |       |          |          |
|------------|---|--------|----------|----------|-------|----------|----------|
| P07996     | 0 | 1      | 493.573  | 1478.704 | 4.97  | 0.00245  | 12.68804 |
| P07996     | 0 | 0.48   | 540.9528 | 1620.844 | 2.03  | 0.00109  | 33.10731 |
| P02763     | 0 | 1      | 714.3925 | 2141.163 | 1.19  | 0.00085  | 5.92102  |
| P02763     | 0 | 1      | 536.0457 | 2141.161 | 0.36  | 0.00019  | 7.142251 |
| P02763     | 0 | 1      | 714.3925 | 2141.163 | 1.28  | 0.00091  | 6.891572 |
| P02763     | 0 | 1      | 536.0465 | 2141.164 | 1.84  | 0.00099  | 11.43514 |
| P02763     | 0 | 1      | 714.3924 | 2141.163 | 1.11  | 0.00079  | 9.436403 |
| P02763     | 0 | 1      | 943.9582 | 1886.909 | 0.86  | 0.00082  | 0        |
| P02763     | 0 | 1      | 629.6424 | 1886.913 | 2.73  | 0.00172  | 6.885006 |
| P02763     | 0 | 1      | 943.9593 | 1886.911 | 2.03  | 0.00191  | 0        |
| P02763     | 0 | 1      | 871.9072 | 1742.807 | 1.01  | 0.00088  | 25.03623 |
| P02763     | 0 | 0.9643 | 583.9594 | 1749.864 | 1.57  | 0.00092  | 11.7203  |
| P02763     | 0 | 0.9048 | 867.441  | 1733.875 | 5.17  | 0.00449  | 60.56815 |
| P02763     | 0 | 0.9718 | 867.4374 | 1733.867 | 0.95  | 0.00082  | 11.49671 |
| P02763     | 0 | 0.8621 | 578.6281 | 1733.87  | 2.28  | 0.00132  | 7.274514 |
| P02763     | 0 | 0.9048 | 475.0204 | 1897.06  | 1.78  | 0.00084  | 4.895586 |
| P02763     | 0 | 0.9388 | 629.6416 | 1886.91  | 1.47  | 0.00093  | 8.506496 |
| P02763; P1 | 0 | 0.7966 | 497.7645 | 994.5217 | 1.34  | 0.00066  | 5.573522 |
| P02763; P1 | 0 | 1      | 652.8492 | 1304.691 | 0.31  | 0.0002   | 3.561763 |
| P02763     | 0 | 0.7895 | 700.8693 | 1400.731 | 0.98  | 0.00069  | 7.169956 |
| P02763     | 0 | 1      | 633.0246 | 1897.059 | 1.46  | 0.00093  | 33.07316 |
| P02763     | 0 | 0.9375 | 475.0196 | 1897.057 | 0.1   | 0.00005  | 2.942715 |
| P02763     | 0 | 0.9375 | 475.0204 | 1897.06  | 1.65  | 0.00078  | 2.675806 |
| P02763     | 0 | 1      | 633.0249 | 1897.06  | 1.95  | 0.00123  | 2.284936 |
| P02763; P1 | 1 | 0.6667 | 484.2695 | 1450.794 | 0.2   | 0.0001   | 12.35338 |
| P02763; P1 | 0 | 0.8333 | 497.7651 | 994.5229 | 2.56  | 0.00127  | 0        |
| P02763; P1 | 1 | 0.7059 | 484.2695 | 1450.794 | 0.27  | 0.00013  | 29.48372 |
| P02763; P1 | 1 | 0.619  | 484.2691 | 1450.793 | -0.55 | -0.00027 | 12.07269 |
| P02763     | 0 | 1      | 629.6422 | 1886.912 | 2.34  | 0.00147  | 25.50508 |
| P02763; P1 | 1 | 0.6667 | 484.2699 | 1450.795 | 1.02  | 0.0005   | 28.49728 |
| P02763; P1 | 1 | 0.7    | 484.269  | 1450.792 | -0.87 | -0.00042 | 17.58412 |
| P02763     | 0 | 1      | 628.8189 | 1256.63  | 1.98  | 0.00124  | 5.176771 |
| P02763; P1 | 0 | 1      | 652.8502 | 1304.693 | 1.71  | 0.00112  | 4.641958 |
| P02763     | 0 | 1      | 666.3605 | 1997.067 | 4.43  | 0.00295  | 0        |
| P02763; P1 | 1 | 0.8824 | 484.2694 | 1450.794 | 0.14  | 0.00007  | 47.73605 |
| P02763     | 0 | 0.5263 | 467.5821 | 1400.732 | 1.24  | 0.00058  | 8.623795 |
| P02763     | 0 | 1      | 666.3593 | 1997.063 | 2.6   | 0.00173  | 11.48709 |
| P02763     | 0 | 1      | 500.0201 | 1997.058 | 0.15  | 0.00007  | 7.745005 |
| P02763; P1 | 1 | 0.5    | 436.2366 | 1306.695 | 2.87  | 0.00125  | 16.76086 |
| P02763     | 0 | 0.871  | 467.581  | 1400.729 | -1.05 | -0.00049 | 7.91581  |
| P02763; P1 | 0 | 1      | 580.7996 | 1160.592 | 2.78  | 0.00161  | 13.73507 |
| P02763     | 0 | 0.8    | 438.9952 | 1752.959 | 2.56  | 0.00112  | 5.344932 |
| P02763     | 0 | 1      | 628.8197 | 1256.632 | 3.34  | 0.0021   | 52.48353 |
| P02763     | 0 | 1      | 633.0247 | 1897.059 | 1.56  | 0.00099  | 25.11193 |
| P02763; P1 | 1 | 0.5    | 436.2366 | 1306.695 | 2.87  | 0.00125  | 16.76086 |
| P02763     | 0 | 1      | 629.6404 | 1886.907 | -0.47 | -0.0003  | 46.19625 |
| P02763     | 0 | 1      | 666.3589 | 1997.062 | 1.96  | 0.0013   | 6.146193 |
| P02763     | 0 | 0.0952 | 475.0215 | 1897.064 | 4.09  | 0.00194  | 0        |
| P01857; P0 | 0 | 0.8902 | 537.3005 | 1609.887 | 3.05  | 0.00164  | 13.45807 |
| P01857; P0 | 0 | 0.9608 | 805.447  | 1609.887 | 2.87  | 0.00231  | 0        |
| P01857     | 0 | 0.8448 | 492.2893 | 1474.853 | 1.69  | 0.00083  | 16.05057 |
| P01857     | 0 | 0.8873 | 737.9314 | 1474.856 | 3.21  | 0.00237  | 6.861941 |



|            |   |        |          |          |       |          |          |
|------------|---|--------|----------|----------|-------|----------|----------|
| P01857     | 0 | 0.8475 | 492.2898 | 1474.855 | 2.75  | 0.00135  | 14.36244 |
| P01857     | 0 | 0.9815 | 656.0087 | 1966.011 | 2.72  | 0.00178  | 7.961033 |
| P01857     | 0 | 1      | 656.0087 | 1966.012 | 2.81  | 0.00184  | 8.859803 |
| P01857; P0 | 0 | 0.6667 | 483.9505 | 1449.837 | 2.21  | 0.00107  | 9.518343 |
| P01857; P0 | 0 | 1      | 483.9502 | 1449.836 | 1.51  | 0.00073  | 24.07588 |
| P01857     | 0 | 1      | 721.3821 | 2162.132 | 2.65  | 0.00191  | 7.10177  |
| P01857     | 0 | 1      | 819.9475 | 3276.768 | 1.37  | 0.00112  | 3.988913 |
| P01857     | 0 | 1      | 656.1607 | 3276.774 | 3.26  | 0.00214  | 25.85149 |
| P01857     | 0 | 1      | 656.1602 | 3276.772 | 2.52  | 0.00165  | 7.613265 |
| P01857     | 0 | 1      | 607.5648 | 2427.237 | 2.43  | 0.00147  | 21.24873 |
| P01857     | 0 | 1      | 809.7507 | 2427.238 | 2.51  | 0.00203  | 5.750351 |
| P01857; P0 | 0 | 0.9643 | 563.8591 | 1126.711 | 3.07  | 0.00173  | 8.029201 |
| P01857; P0 | 0 | 1      | 715.8931 | 1430.779 | 2.09  | 0.00149  | 3.09548  |
| P01857; P0 | 0 | 1      | 477.5974 | 1430.778 | 1.06  | 0.0005   | 11.75311 |
| P01857; P0 | 0 | 0.9697 | 715.8933 | 1430.779 | 2.34  | 0.00168  | 2.854816 |
| P01857; P0 | 0 | 0.9672 | 715.8933 | 1430.779 | 2.34  | 0.00168  | 5.368532 |
| P01857; P0 | 0 | 1      | 715.8925 | 1430.778 | 1.15  | 0.00082  | 0        |
| P01857     | 0 | 0.913  | 627.3385 | 3132.663 | 0.55  | 0.00035  | 79.04011 |
| P01857; P0 | 0 | 1      | 477.598  | 1430.779 | 2.33  | 0.00111  | 7.543014 |
| P01857; P0 | 0 | 0.8621 | 477.5976 | 1430.778 | 1.5   | 0.00072  | 19.59222 |
| P01857; P0 | 0 | 0.5357 | 537.3008 | 1609.888 | 3.5   | 0.00188  | 75.55756 |
| P01857     | 0 | 0.7857 | 721.3821 | 2162.132 | 2.74  | 0.00197  | 17.24101 |
| P01857; P0 | 0 | 0.8889 | 563.8597 | 1126.712 | 4.26  | 0.0024   | 9.855687 |
| P01857     | 0 | 0.6458 | 665.8794 | 1330.752 | 2.1   | 0.0014   | 12.72256 |
| P01857     | 0 | 0.75   | 721.3826 | 2162.133 | 3.42  | 0.00246  | 55.10471 |
| P01857     | 0 | 1      | 721.3831 | 2162.135 | 4.01  | 0.00289  | 11.25961 |
| P01857     | 0 | 0.7143 | 673.3479 | 2018.029 | 2.61  | 0.00175  | 4.239983 |
| P01857     | 0 | 0.85   | 656.0088 | 1966.012 | 2.9   | 0.0019   | 8.825878 |
| P01857; P0 | 0 | 0.6981 | 426.218  | 851.4287 | -0.51 | -0.00022 | 5.356847 |
| P01857     | 0 | 1      | 721.3808 | 2162.128 | 0.88  | 0.00063  | 11.32693 |
| P01857     | 0 | 0.8182 | 737.9281 | 1474.849 | -1.26 | -0.00093 | 0        |
| P01857     | 0 | 0.5    | 607.5663 | 2427.243 | 4.84  | 0.00294  | 28.7832  |
| P01857; P0 | 0 | 0.7619 | 477.5977 | 1430.779 | 1.76  | 0.00084  | 49.38679 |
| P19652     | 0 | 0.9302 | 574.9561 | 1722.854 | 2.29  | 0.00131  | 2.16749  |
| P19652     | 0 | 1      | 853.9317 | 1706.856 | 0.7   | 0.0006   | 9.67487  |
| P19652     | 0 | 0.9677 | 569.6246 | 1706.859 | 2.48  | 0.00141  | 10.18598 |
| P19652     | 0 | 0.8095 | 569.6243 | 1706.858 | 1.94  | 0.00111  | 7.231671 |
| P19652     | 0 | 1      | 460.274  | 1378.807 | -0.11 | -0.00005 | 52.58355 |
| P19652     | 0 | 1      | 460.2744 | 1378.809 | 0.82  | 0.00037  | 5.731555 |
| P19652     | 0 | 1      | 689.9083 | 1378.809 | 1.22  | 0.00084  | 3.456521 |
| P19652     | 0 | 1      | 460.2745 | 1378.809 | 1.01  | 0.00047  | 16.47527 |
| P19652     | 0 | 1      | 460.2746 | 1378.809 | 1.21  | 0.00056  | 43.86533 |
| P19652     | 0 | 1      | 1129.043 | 2257.078 | 1.43  | 0.00161  | 0        |
| P19652     | 0 | 1      | 753.0307 | 2257.078 | 1.15  | 0.00087  | 2.772164 |
| P19652     | 0 | 1      | 548.0466 | 2189.164 | 1.91  | 0.00105  | 7.236839 |
| P19652     | 0 | 1      | 730.3926 | 2189.163 | 1.42  | 0.00103  | 11.63029 |
| P19652     | 0 | 1      | 548.0455 | 2189.16  | 0.02  | 0.00001  | 31.38284 |
| P19652     | 0 | 1      | 1129.04  | 2257.073 | -0.95 | -0.00107 | 0        |
| P19652     | 0 | 0.9889 | 753.0311 | 2257.079 | 1.64  | 0.00123  | 3.364546 |
| P02763; P1 | 0 | 0.7966 | 497.7645 | 994.5217 | 1.34  | 0.00066  | 5.573522 |
| P02763; P1 | 0 | 1      | 652.8492 | 1304.691 | 0.31  | 0.0002   | 3.561763 |
| P02763; P1 | 1 | 0.6667 | 484.2695 | 1450.794 | 0.2   | 0.0001   | 12.35338 |

|            |   |        |          |          |       |          |          |
|------------|---|--------|----------|----------|-------|----------|----------|
| P02763; P1 | 0 | 0.8333 | 497.7651 | 994.5229 | 2.56  | 0.00127  | 0        |
| P02763; P1 | 1 | 0.7059 | 484.2695 | 1450.794 | 0.27  | 0.00013  | 29.48372 |
| P19652     | 0 | 1      | 412.241  | 1234.708 | 2.38  | 0.00098  | 32.31036 |
| P02763; P1 | 1 | 0.619  | 484.2691 | 1450.793 | -0.55 | -0.00027 | 12.07269 |
| P19652     | 0 | 0.9722 | 574.9558 | 1722.853 | 1.65  | 0.00095  | 0        |
| P02763; P1 | 1 | 0.6667 | 484.2699 | 1450.795 | 1.02  | 0.0005   | 28.49728 |
| P19652     | 0 | 1      | 460.2734 | 1378.805 | -1.51 | -0.00069 | 8.542577 |
| P02763; P1 | 1 | 0.7    | 484.269  | 1450.792 | -0.87 | -0.00042 | 17.58412 |
| P19652     | 0 | 0.9333 | 853.9325 | 1706.858 | 1.63  | 0.00139  | 33.86631 |
| P02763; P1 | 0 | 1      | 652.8502 | 1304.693 | 1.71  | 0.00112  | 4.641958 |
| P02763; P1 | 1 | 0.8824 | 484.2694 | 1450.794 | 0.14  | 0.00007  | 47.73605 |
| P19652     | 0 | 1      | 574.9562 | 1722.854 | 2.5   | 0.00144  | 5.554844 |
| P02763; P1 | 1 | 0.5    | 436.2366 | 1306.695 | 2.87  | 0.00125  | 16.76086 |
| P02763; P1 | 0 | 1      | 580.7996 | 1160.592 | 2.78  | 0.00161  | 13.73507 |
| P19652     | 0 | 1      | 689.9075 | 1378.808 | 0.16  | 0.00011  | 0        |
| P19652     | 0 | 0.8333 | 478.2396 | 1432.704 | 1.45  | 0.00069  | 5.876993 |
| P19652     | 0 | 0.9643 | 689.9085 | 1378.81  | 1.49  | 0.00103  | 0        |
| P02763; P1 | 1 | 0.5    | 436.2366 | 1306.695 | 2.87  | 0.00125  | 16.76086 |
| P01834     | 0 | 1      | 722.0504 | 2164.137 | 2.52  | 0.00182  | 9.780593 |
| P01834     | 0 | 0.9    | 541.7892 | 2164.135 | 1.78  | 0.00096  | 8.307413 |
| P01834     | 0 | 1      | 745.4172 | 2234.237 | 2.64  | 0.00196  | 5.107466 |
| P01834     | 0 | 1      | 745.4171 | 2234.237 | 2.56  | 0.0019   | 5.193758 |
| P01834     | 0 | 1      | 745.416  | 2234.233 | 1.08  | 0.0008   | 5.242318 |
| P01834     | 0 | 1      | 745.4169 | 2234.236 | 2.23  | 0.00166  | 3.98656  |
| P01834     | 0 | 0.9412 | 597.6598 | 1790.965 | 1.25  | 0.00075  | 0        |
| P01834     | 0 | 0.8649 | 597.6612 | 1790.969 | 3.61  | 0.00215  | 5.476667 |
| P01834     | 0 | 0.8462 | 697.3833 | 2090.135 | 3.03  | 0.00211  | 23.38654 |
| P01834     | 0 | 1      | 648.0062 | 1942.004 | 3.52  | 0.00228  | 24.74631 |
| P01834     | 0 | 0.9667 | 971.5058 | 1942.004 | 3.62  | 0.00351  | 16.38128 |
| P01834     | 0 | 1      | 648.0059 | 1942.003 | 3.05  | 0.00197  | 61.85017 |
| P01834     | 0 | 0.8953 | 808.7309 | 2424.178 | 2.18  | 0.00176  | 6.063765 |
| P01834     | 0 | 0.99   | 808.7311 | 2424.179 | 2.48  | 0.00201  | 8.000682 |
| P01834     | 0 | 0.973  | 808.7309 | 2424.178 | 2.18  | 0.00176  | 21.56556 |
| P01834     | 0 | 0.8235 | 697.3823 | 2090.132 | 1.54  | 0.00107  | 0        |
| P01834     | 0 | 0.8889 | 541.7896 | 2164.137 | 2.57  | 0.00139  | 25.89116 |
| P01834     | 0 | 0.9688 | 722.0516 | 2164.14  | 4.3   | 0.0031   | 22.86751 |
| P01834     | 0 | 1      | 606.801  | 2424.182 | 3.89  | 0.00236  | 19.96503 |
| P01834     | 0 | 0.8696 | 597.661  | 1790.968 | 3.2   | 0.00191  | 35.47383 |
| P01834     | 0 | 0.4211 | 597.6605 | 1790.967 | 2.48  | 0.00148  | 23.48841 |
| P01834     | 0 | 0.7273 | 597.661  | 1790.968 | 3.3   | 0.00197  | 7.928895 |
| P01834     | 0 | 0.9048 | 808.7326 | 2424.183 | 4.29  | 0.00347  | 5.926784 |
| P01834     | 0 | 0.5294 | 697.3825 | 2090.133 | 1.8   | 0.00126  | 17.84052 |
| P01876     | 0 | 0.8986 | 610.3815 | 1219.756 | 4.74  | 0.00289  | 9.082395 |
| P01876     | 0 | 0.9062 | 538.3286 | 1075.65  | 1.87  | 0.00101  | 32.21341 |
| P01876; P0 | 0 | 1      | 660.6904 | 1980.057 | 2.38  | 0.00157  | 2.719908 |
| P01876; P0 | 0 | 1      | 660.6906 | 1980.057 | 2.75  | 0.00182  | 18.97561 |
| P01876; P0 | 1 | 1      | 693.1183 | 2769.451 | 3.08  | 0.00213  | 12.61343 |
| P01876     | 0 | 0.9326 | 610.3173 | 1828.937 | 2.99  | 0.00182  | 7.940055 |
| P01876; P0 | 0 | 0.8421 | 453.2509 | 1357.738 | 2.75  | 0.00124  | 17.89252 |
| P01876     | 0 | 1      | 961.1179 | 2881.339 | 2.8   | 0.00269  | 8.074305 |
| P01876     | 0 | 0.7727 | 864.9357 | 3456.721 | 0.39  | 0.00033  | 9.644367 |
| P01876     | 0 | 0.8333 | 864.9375 | 3456.728 | 2.51  | 0.00217  | 0        |

|            |   |        |          |          |       |          |          |
|------------|---|--------|----------|----------|-------|----------|----------|
| P01876; P0 | 0 | 0.75   | 542.798  | 1084.589 | 1.9   | 0.00103  | 16.38632 |
| P01876     | 0 | 1      | 864.9373 | 3456.727 | 2.29  | 0.00198  | 0        |
| P01876; P0 | 0 | 0.7941 | 542.7979 | 1084.588 | 1.56  | 0.00085  | 0        |
| P01876; P0 | 1 | 0.95   | 693.1158 | 2769.442 | -0.45 | -0.00031 | 35.64758 |
| P01876     | 0 | 0.8621 | 407.2557 | 1219.753 | 2.11  | 0.00086  | 37.25089 |
| P01876     | 0 | 0.88   | 555.2813 | 1663.829 | 3.25  | 0.0018   | 9.320871 |
| P01876     | 0 | 1      | 914.9714 | 1828.936 | 2     | 0.00183  | 8.756765 |
| P01876; P0 | 0 | 0.8605 | 559.8174 | 1118.627 | 3.99  | 0.00223  | 40.71346 |
| P35443; P4 | 0 | 0.975  | 675.0043 | 2022.998 | 3.06  | 0.00206  | 4.581845 |
| P35443; P4 | 0 | 1      | 461.7607 | 1844.021 | 0.61  | 0.00028  | 43.29137 |
| P49747     | 0 | 1      | 704.635  | 2111.89  | 2.6   | 0.00183  | 3.150305 |
| P49747     | 0 | 0.987  | 648.6239 | 1943.857 | 2.09  | 0.00135  | 6.503608 |
| P49747     | 0 | 0.9556 | 648.6247 | 1943.86  | 3.31  | 0.00214  | 4.213584 |
| P49747     | 0 | 0.9091 | 770.3763 | 1539.745 | 2.42  | 0.00187  | 4.921598 |
| P49747     | 0 | 0.7679 | 513.9195 | 1539.744 | 1.46  | 0.00075  | 10.19977 |
| P49747     | 0 | 0.9344 | 513.9192 | 1539.743 | 0.87  | 0.00045  | 0        |
| P35443; P4 | 0 | 0.8095 | 657.4075 | 1313.808 | 3.48  | 0.00228  | 6.450108 |
| P49747     | 0 | 0.9231 | 588.3127 | 1175.618 | 3.86  | 0.00227  | 41.96267 |
| P49747     | 0 | 1      | 704.6329 | 2111.884 | -0.35 | -0.00025 | 5.407792 |
| P49747     | 0 | 0.8462 | 586.6285 | 1757.871 | 1.33  | 0.00078  | 28.75407 |
| P02747     | 0 | 0.9    | 739.3748 | 2216.11  | 1.07  | 0.00079  | 11.37481 |
| P02747     | 0 | 1      | 739.3756 | 2216.112 | 2.23  | 0.00165  | 22.72268 |
| P02747     | 0 | 1      | 712.3843 | 1423.761 | 0.58  | 0.00041  | 7.910392 |
| P02747     | 0 | 0.8431 | 475.2597 | 1423.765 | 2.86  | 0.00136  | 16.58792 |
| P02747     | 0 | 0.9048 | 467.9371 | 1401.797 | 2.59  | 0.00121  | 28.81486 |
| P02747     | 0 | 1      | 739.3759 | 2216.113 | 2.56  | 0.00189  | 9.761957 |
| P02747     | 0 | 0.9667 | 554.7833 | 2216.111 | 1.76  | 0.00097  | 5.64569  |
| P02747     | 0 | 1      | 486.9323 | 1458.782 | 0.88  | 0.00043  | 4.525704 |
| P02747     | 0 | 1      | 534.967  | 1602.887 | 2.07  | 0.00111  | 0        |
| P02747     | 0 | 0.8718 | 614.8451 | 1228.683 | 1.85  | 0.00114  | 17.26646 |
| P02747     | 0 | 1      | 739.3761 | 2216.114 | 2.89  | 0.00214  | 7.130405 |
| P02747     | 0 | 1      | 486.9307 | 1458.778 | -2.44 | -0.00119 | 57.93151 |
| P02747     | 0 | 0.825  | 410.2329 | 1228.684 | 2.74  | 0.00112  | 0        |
| P02747     | 0 | 1      | 691.3405 | 2072.007 | 0.83  | 0.00057  | 0        |
| P02747     | 0 | 0.6364 | 614.8461 | 1228.685 | 3.54  | 0.00218  | 9.785963 |
| Q96IY4     | 0 | 0.9574 | 504.933  | 1512.784 | 1.87  | 0.00095  | 2.262344 |
| Q96IY4     | 0 | 1      | 756.8958 | 1512.784 | 1.9   | 0.00144  | 3.976117 |
| Q96IY4     | 0 | 0.8125 | 435.9191 | 1305.743 | 1.72  | 0.00075  | 41.30577 |
| Q96IY4     | 0 | 1      | 642.6412 | 1925.909 | 2.44  | 0.00157  | 24.68243 |
| Q96IY4     | 0 | 1      | 523.9413 | 1569.809 | 1.06  | 0.00055  | 48.40847 |
| Q96IY4     | 0 | 0.9    | 523.9415 | 1569.81  | 1.52  | 0.0008   | 5.358249 |
| Q96IY4     | 1 | 0.9773 | 686.7086 | 2058.111 | 2.03  | 0.00139  | 22.70815 |
| Q96IY4     | 1 | 0.9661 | 515.2824 | 2058.108 | 0.42  | 0.00022  | 8.380038 |
| Q96IY4     | 1 | 1      | 515.2806 | 2058.101 | -3.02 | -0.00155 | 4.180572 |
| Q96IY4     | 0 | 0.6429 | 504.9323 | 1512.782 | 0.54  | 0.00027  | 21.02876 |
| Q96IY4     | 0 | 0.5    | 653.3752 | 1305.743 | 1.99  | 0.0013   | 28.11555 |
| Q9NZP8     | 0 | 1      | 820.3797 | 2459.125 | 1.85  | 0.00151  | 0        |
| Q9NZP8; PC | 0 | 0.6491 | 480.274  | 959.5408 | 1.78  | 0.00085  | 8.877599 |
| Q9NZP8     | 0 | 0.9231 | 705.9165 | 1410.826 | 1.58  | 0.00112  | 35.6143  |
| Q9NZP8     | 0 | 1      | 568.0043 | 1701.998 | 3.08  | 0.00175  | 14.89096 |
| Q9NZP8     | 0 | 0.9434 | 568.0041 | 1701.998 | 2.76  | 0.00156  | 11.80002 |
| Q9NZP8     | 0 | 1      | 469.9152 | 1407.731 | 1.17  | 0.00055  | 17.19986 |

|            |   |        |          |          |       |          |          |
|------------|---|--------|----------|----------|-------|----------|----------|
| Q9NZP8     | 0 | 0.7812 | 376.8818 | 1128.631 | 2.44  | 0.00092  | 29.82521 |
| Q9NZP8     | 0 | 0.9143 | 814.9291 | 1628.851 | 1.64  | 0.00133  | 11.67713 |
| Q9NZP8     | 0 | 0.8605 | 564.8198 | 1128.632 | 3.69  | 0.00208  | 0        |
| Q9NZP8     | 0 | 1      | 568.0045 | 1701.999 | 3.51  | 0.00199  | 9.614187 |
| Q9NZP8     | 0 | 0.875  | 568.0026 | 1701.993 | 0.07  | 0.00004  | 20.91151 |
| P05090     | 0 | 0.8571 | 856.4788 | 1711.95  | 1.98  | 0.00169  | 4.151644 |
| P05090     | 0 | 0.9796 | 571.3221 | 1711.952 | 2.93  | 0.00167  | 9.000759 |
| P05090     | 0 | 0.75   | 856.479  | 1711.951 | 2.26  | 0.00194  | 6.08145  |
| P05090     | 0 | 0.8305 | 571.3222 | 1711.952 | 3.04  | 0.00173  | 15.43143 |
| P05090     | 0 | 0.9111 | 571.3218 | 1711.951 | 2.4   | 0.00137  | 13.45836 |
| P05090     | 0 | 0.9655 | 571.3221 | 1711.952 | 2.82  | 0.00161  | 10.15095 |
| P05090     | 0 | 0.9661 | 649.3293 | 1945.973 | 2.72  | 0.00176  | 13.71424 |
| P05090     | 0 | 0.8627 | 571.3221 | 1711.952 | 2.93  | 0.00167  | 13.82257 |
| P05090     | 0 | 0.7857 | 506.9635 | 1518.876 | 1.96  | 0.00099  | 11.07617 |
| P05090     | 0 | 1      | 571.3224 | 1711.953 | 3.36  | 0.00192  | 29.79873 |
| P05090     | 0 | 0.9104 | 571.3239 | 1711.957 | 5.93  | 0.00338  | 24.95804 |
| P05090     | 0 | 1      | 532.9379 | 1596.799 | 1.67  | 0.00089  | 0        |
| P05090     | 0 | 0.8333 | 649.328  | 1945.969 | 0.74  | 0.00048  | 10.49364 |
| P05090     | 0 | 0.5789 | 759.9419 | 1518.877 | 2.33  | 0.00177  | 7.085978 |
| P05090     | 0 | 0.9667 | 571.3229 | 1711.954 | 4.32  | 0.00247  | 54.0492  |
| P05090     | 1 | 0.9048 | 618.3394 | 1853.004 | 2.81  | 0.00174  | 10.93978 |
| P05090     | 0 | 0.6333 | 856.4785 | 1711.95  | 1.62  | 0.00139  | 6.436097 |
| P05090     | 0 | 0.4091 | 506.9633 | 1518.875 | 1.6   | 0.00081  | 26.18867 |
| P05090     | 0 | 0.9655 | 856.4805 | 1711.954 | 3.97  | 0.0034   | 6.581279 |
| P00746     | 0 | 1      | 520.3023 | 2078.187 | 1.13  | 0.00059  | 22.17647 |
| P00746     | 0 | 0.974  | 770.3915 | 2309.16  | 1.02  | 0.00079  | 3.706459 |
| P00746     | 0 | 1      | 476.2823 | 1902.107 | 1.61  | 0.00076  | 2.769631 |
| P00746     | 0 | 0.8438 | 634.708  | 1902.109 | 2.8   | 0.00178  | 10.37494 |
| P00746     | 0 | 0.9412 | 634.7071 | 1902.107 | 1.36  | 0.00086  | 58.39006 |
| P00746     | 0 | 0.8636 | 743.1526 | 2969.589 | 2.13  | 0.00158  | 4.847384 |
| P00746     | 0 | 1      | 693.4019 | 2078.191 | 3.08  | 0.00213  | 0        |
| P00746     | 1 | 1      | 559.3275 | 2234.288 | 0.93  | 0.00052  | 15.41343 |
| Q2TV78; P2 | 0 | 1      | 536.0283 | 2141.091 | -0.32 | -0.00017 | 41.41212 |
| Q2TV78; P2 | 0 | 0.92   | 429.0256 | 2141.099 | 3.35  | 0.00143  | 21.05733 |
| Q2TV78; P2 | 0 | 1      | 536.0294 | 2141.096 | 1.73  | 0.00092  | 41.93961 |
| Q2TV78; P2 | 0 | 1      | 832.9111 | 3328.623 | 2.7   | 0.00225  | 30.29306 |
| Q2TV78; P2 | 0 | 0.8571 | 580.8331 | 1160.659 | 3.83  | 0.00222  | 2.265286 |
| Q2TV78; P2 | 0 | 0.8125 | 580.8327 | 1160.658 | 3.2   | 0.00186  | 2.265191 |
| Q2TV78; P2 | 0 | 0.8148 | 506.6295 | 1517.874 | 1.42  | 0.00072  | 7.35443  |
| Q2TV78; P2 | 0 | 1      | 822.382  | 2465.131 | 1.67  | 0.00137  | 3.663897 |
| P11226     | 0 | 0.8636 | 620.3715 | 1239.736 | 1.46  | 0.00091  | 11.21213 |
| P11226     | 0 | 0.9362 | 770.4123 | 1539.817 | 1.86  | 0.00143  | 1.798474 |
| P11226     | 0 | 1      | 718.3438 | 1435.68  | 1.46  | 0.00105  | 11.42586 |
| P11226     | 0 | 0.8205 | 740.8806 | 1480.754 | 1.76  | 0.0013   | 6.814324 |
| P11226     | 0 | 0.875  | 494.2559 | 1480.753 | 1.33  | 0.00066  | 39.88413 |
| P11226     | 0 | 0.7188 | 513.9434 | 1539.816 | 0.7   | 0.00036  | 7.559332 |
| P11226     | 0 | 0.6452 | 479.2324 | 1435.683 | 3.13  | 0.0015   | 10.88133 |
| P11226     | 0 | 1      | 521.3205 | 1041.634 | 4.06  | 0.00211  | 29.28679 |
| P00915     | 0 | 0.925  | 591.0864 | 2361.324 | 4.26  | 0.00252  | 17.68858 |
| P00915     | 0 | 0.9804 | 737.9497 | 1474.892 | 1.09  | 0.0008   | 43.50139 |
| P00915     | 0 | 1      | 670.3009 | 1339.595 | 1.69  | 0.00113  | 2.367105 |
| P00915     | 0 | 0.6923 | 629.9033 | 1258.799 | 1.56  | 0.00098  | 18.99691 |

|        |   |        |          |          |       |          |          |
|--------|---|--------|----------|----------|-------|----------|----------|
| P00915 | 0 | 0.7347 | 557.8524 | 1114.697 | 1.99  | 0.00111  | 35.94655 |
| P00915 | 0 | 0.9836 | 670.3013 | 1339.595 | 2.32  | 0.00156  | 0        |
| P00915 | 0 | 0.7714 | 492.3029 | 1474.894 | 2.42  | 0.00119  | 33.31845 |
| P00915 | 0 | 0.9    | 575.6372 | 1724.897 | 2.05  | 0.00118  | 7.584534 |
| Q9NQ79 | 0 | 0.98   | 845.4349 | 1689.863 | 3.65  | 0.00309  | 19.54707 |
| Q9NQ79 | 0 | 0.9231 | 489.2755 | 1465.812 | 3.1   | 0.00152  | 0        |
| Q9NQ79 | 0 | 1      | 811.0687 | 2431.191 | 2.34  | 0.00189  | 3.476779 |
| Q9NQ79 | 0 | 0.7429 | 511.3004 | 1021.594 | 2.41  | 0.00123  | 23.89659 |
| Q9NQ79 | 0 | 0.4138 | 603.3059 | 1807.903 | 4.4   | 0.00265  | 42.04036 |
| Q9UGM5 | 0 | 0.75   | 546.627  | 1637.866 | 2.46  | 0.00134  | 10.6876  |
| Q9UGM5 | 0 | 1      | 452.9001 | 1356.686 | 0.54  | 0.00024  | 11.5939  |
| Q9UGM5 | 0 | 0.987  | 787.7648 | 2361.28  | 2.82  | 0.00222  | 5.240521 |
| Q9UGM5 | 0 | 0.9167 | 678.8474 | 1356.688 | 1.83  | 0.00124  | 4.205239 |
| Q9UGM5 | 0 | 0.9    | 555.9584 | 1665.861 | 3.42  | 0.0019   | 21.6245  |
| Q9UGM5 | 0 | 1      | 569.7858 | 1138.564 | 2.94  | 0.00167  | 2.995152 |
| Q9UGM5 | 0 | 0.8947 | 555.9575 | 1665.858 | 1.77  | 0.00098  | 17.51114 |
| Q9UGM5 | 0 | 0.88   | 678.8482 | 1356.689 | 3     | 0.00203  | 23.19679 |
| P22352 | 0 | 1      | 748.4141 | 2243.228 | 2.73  | 0.00204  | 5.704846 |
| P22352 | 0 | 0.7231 | 729.9172 | 1458.827 | 0.88  | 0.00064  | 4.831704 |
| P22352 | 0 | 1      | 615.0082 | 1843.01  | 2.65  | 0.00163  | 44.78246 |
| P22352 | 0 | 0.5818 | 518.8162 | 1036.625 | 0.94  | 0.00049  | 19.93784 |
| P22352 | 0 | 0.6296 | 486.9477 | 1458.829 | 1.85  | 0.0009   | 17.57738 |
| P22352 | 0 | 0.9091 | 748.4114 | 2243.22  | -0.87 | -0.00065 | 7.934869 |
| P22352 | 0 | 1      | 586.8012 | 1172.595 | 2.22  | 0.0013   | 41.96244 |
| P55058 | 0 | 0.8462 | 452.2451 | 1354.721 | 2.01  | 0.00091  | 17.81859 |
| P55058 | 0 | 0.9524 | 981.0424 | 1961.078 | 3.26  | 0.0032   | 4.468916 |
| P55058 | 0 | 1      | 491.2564 | 1471.755 | 2.57  | 0.00126  | 4.221241 |
| P55058 | 0 | 0.8065 | 591.3274 | 1181.648 | 3.38  | 0.00199  | 19.46548 |
| P55058 | 0 | 0.8824 | 648.6837 | 1944.036 | 6.49  | 0.00421  | 18.43232 |
| P22891 | 0 | 1      | 425.241  | 1273.708 | 1.21  | 0.00051  | 6.278729 |
| P22891 | 1 | 0.9677 | 618.689  | 1854.053 | 2.67  | 0.00165  | 44.81833 |
| P22891 | 0 | 0.7551 | 452.2589 | 1354.762 | 1.51  | 0.00068  | 10.16879 |
| P22891 | 0 | 0.8108 | 437.591  | 1310.759 | 2.09  | 0.00091  | 15.46497 |
| P22891 | 0 | 0.7222 | 655.8825 | 1310.758 | 1.47  | 0.00096  | 43.32256 |
| P22891 | 0 | 1      | 626.6416 | 1877.91  | -0.85 | -0.00053 | 63.89486 |
| P13591 | 0 | 0.875  | 602.3257 | 1804.963 | 3     | 0.0018   | 7.197617 |
| P13591 | 0 | 0.7209 | 490.9449 | 1470.82  | 3.22  | 0.00158  | 72.08906 |
| P13591 | 0 | 0.8627 | 499.6142 | 1496.828 | 5.46  | 0.00272  | 76.78727 |
| P13591 | 0 | 0.7368 | 477.2618 | 1429.771 | 2.17  | 0.00103  | 22.81896 |
| P13591 | 0 | 0.7105 | 518.3365 | 1035.666 | 0.47  | 0.00024  | 26.23435 |
| P13591 | 0 | 1      | 748.9139 | 1496.821 | 0.49  | 0.00037  | 40.27512 |
| Q9UHG3 | 0 | 0.5278 | 620.002  | 1857.991 | 2.31  | 0.00143  | 4.584499 |
| Q9UHG3 | 0 | 0.8293 | 488.6217 | 1463.851 | 0.86  | 0.00042  | 27.06753 |
| Q9UHG3 | 0 | 0.7419 | 753.9285 | 1506.85  | 3.42  | 0.00258  | 26.75832 |
| Q9UHG3 | 0 | 0.6667 | 452.2666 | 1354.785 | 2.31  | 0.00104  | 18.81942 |
| Q9UHG3 | 0 | 0.5517 | 411.9274 | 1233.768 | 1.69  | 0.0007   | 4.908089 |
| Q9UHG3 | 0 | 0.6207 | 617.389  | 1233.771 | 4.17  | 0.00258  | 19.64588 |
| Q15582 | 0 | 0.6857 | 491.2768 | 1471.816 | 1.34  | 0.00066  | 37.92909 |
| Q15582 | 0 | 1      | 441.8982 | 1323.68  | 2.1   | 0.00093  | 10.06358 |
| Q15582 | 1 | 1      | 464.9276 | 1392.768 | 1.02  | 0.00047  | 34.60479 |
| Q15582 | 0 | 0.6061 | 456.614  | 1367.827 | 1.76  | 0.0008   | 10.51156 |
| Q15582 | 0 | 0.3036 | 553.3403 | 1105.673 | 2.33  | 0.00129  | 9.373934 |

|            |   |        |          |          |       |          |          |
|------------|---|--------|----------|----------|-------|----------|----------|
| Q15582     | 0 | 1      | 441.8976 | 1323.678 | 0.79  | 0.00035  | 61.07894 |
| Q15582     | 0 | 1      | 441.8986 | 1323.681 | 2.86  | 0.00126  | 0        |
| P63267; P6 | 0 | 0.7826 | 483.9488 | 1449.832 | 6.36  | 0.00307  | 34.84767 |
| P63267; P6 | 0 | 1      | 487.2637 | 1459.777 | 0.94  | 0.00046  | 46.31744 |
| A5A3E0; Q9 | 0 | 1      | 554.2729 | 1660.804 | -0.37 | -0.0002  | 38.75434 |
| A5A3E0; P6 | 0 | 0.8636 | 645.6713 | 1934.999 | 2.72  | 0.00175  | 55.86254 |
| A5A3E0; Q9 | 0 | 1      | 505.9223 | 1515.752 | 2.11  | 0.00107  | 29.73994 |
| P63267; P6 | 0 | 0.7826 | 483.9488 | 1449.832 | 6.36  | 0.00307  | 34.84767 |
| P63267; P6 | 0 | 1      | 487.2637 | 1459.777 | 0.94  | 0.00046  | 46.31744 |
| A5A3E0; Q9 | 0 | 1      | 554.2729 | 1660.804 | -0.37 | -0.0002  | 38.75434 |
| A5A3E0; P6 | 0 | 0.8636 | 645.6713 | 1934.999 | 2.72  | 0.00175  | 55.86254 |
| A5A3E0; Q9 | 0 | 1      | 505.9223 | 1515.752 | 2.11  | 0.00107  | 29.73994 |
| Q92820     | 0 | 1      | 525.0145 | 1573.029 | 3.4   | 0.00178  | 31.22417 |
| Q92820     | 1 | 1      | 639.6994 | 1917.084 | 1.61  | 0.00103  | 0        |
| Q92820     | 0 | 0.9412 | 541.9752 | 1623.911 | 3.24  | 0.00175  | 26.37759 |
| Q92820     | 0 | 0.8649 | 455.9276 | 1365.768 | 1.79  | 0.00082  | 42.14945 |
| Q92820     | 0 | 0.5312 | 608.3486 | 1215.69  | 3     | 0.00183  | 22.03184 |
| P02042; P6 | 0 | 1      | 424.2276 | 1270.668 | 1.66  | 0.0007   | 6.509261 |
| P02042; P6 | 0 | 0.9136 | 479.9645 | 1437.879 | 0.68  | 0.00033  | 15.47896 |
| P02042; P6 | 0 | 0.883  | 719.4435 | 1437.88  | 1.26  | 0.00091  | 7.142306 |
| P02042; P6 | 0 | 0.825  | 479.9647 | 1437.88  | 1.06  | 0.00051  | 34.55009 |
| P68871     | 0 | 0.9508 | 610.8676 | 1220.728 | 3.14  | 0.00192  | 14.74708 |
| P68871     | 0 | 0.9821 | 407.5798 | 1220.725 | 0.6   | 0.00025  | 13.17877 |
| P68871     | 0 | 0.973  | 610.8671 | 1220.727 | 2.34  | 0.00143  | 8.040556 |
| P68871     | 0 | 0.9747 | 783.0566 | 2347.155 | 1.42  | 0.00111  | 5.412879 |
| P02042; P6 | 0 | 0.9794 | 647.3928 | 1293.778 | 1.79  | 0.00116  | 26.37509 |
| P02042; P6 | 0 | 0.5    | 414.2438 | 1240.717 | 2.42  | 0.001    | 30.8405  |
| P02100; P0 | 0 | 0.9348 | 709.9196 | 1418.832 | 2.96  | 0.0021   | 14.76605 |
| P02100; P0 | 0 | 0.9286 | 709.9183 | 1418.829 | 1.16  | 0.00082  | 31.45067 |
| P02042; P6 | 0 | 0.9892 | 653.3716 | 1958.1   | 2.79  | 0.00182  | 13.43204 |
| P68871     | 0 | 1      | 556.3072 | 1666.907 | 1.65  | 0.00092  | 5.811198 |
| P68871     | 0 | 1      | 556.3079 | 1666.909 | 2.86  | 0.00159  | 12.83933 |
| P68871     | 0 | 0.9851 | 589.6398 | 1766.905 | 3.63  | 0.00214  | 12.96153 |
| P68871     | 0 | 1      | 589.639  | 1766.902 | 2.18  | 0.00128  | 17.68098 |
| P02042; P6 | 0 | 1      | 424.2276 | 1270.668 | 1.8   | 0.00076  | 0        |
| P68871     | 0 | 1      | 517.0553 | 2065.199 | 0.52  | 0.00027  | 9.718471 |
| P68871     | 0 | 1      | 657.8375 | 1314.668 | 2.15  | 0.00142  | 18.45968 |
| P68871     | 0 | 0.7778 | 729.8886 | 1458.77  | 2.02  | 0.00147  | 54.17877 |
| P02042; P6 | 0 | 1      | 635.8383 | 1270.669 | 2.51  | 0.0016   | 11.28336 |
| P68871     | 0 | 0.8421 | 689.0705 | 2065.197 | -0.65 | -0.00045 | 44.00559 |
| P68871     | 0 | 0.9333 | 833.9583 | 1666.909 | 2.98  | 0.00248  | 20.78093 |
| P02042; P6 | 0 | 1      | 431.931  | 1293.778 | 1.94  | 0.00084  | 37.24517 |
| P02100; P0 | 0 | 1      | 637.8677 | 1274.728 | 1.97  | 0.00125  | 41.66899 |
| P68871     | 0 | 0.913  | 556.3105 | 1666.917 | 7.58  | 0.00421  | 0        |
| P68871     | 0 | 1      | 833.9558 | 1666.904 | 0.05  | 0.00004  | 33.34534 |
| P02656     | 0 | 0.8444 | 620.9914 | 1860.96  | 3.47  | 0.00215  | 8.620186 |
| P02656     | 1 | 0.9839 | 769.0842 | 2305.238 | 1.36  | 0.00105  | 3.286407 |
| P02656     | 0 | 0.875  | 495.605  | 1484.8   | 1.11  | 0.00055  | 7.288025 |
| P02656     | 0 | 0.9545 | 742.9041 | 1484.801 | 1.49  | 0.00111  | 9.683728 |
| P02656     | 0 | 0.9828 | 742.9031 | 1484.799 | 0.17  | 0.00013  | 25.90226 |
| P02656     | 0 | 0.907  | 495.6053 | 1484.801 | 1.73  | 0.00085  | 44.54293 |
| P02656     | 0 | 0.9535 | 495.6046 | 1484.799 | 0.37  | 0.00018  | 7.707762 |

|        |   |        |          |          |       |          |          |
|--------|---|--------|----------|----------|-------|----------|----------|
| P02656 | 0 | 1      | 742.9025 | 1484.798 | -0.73 | -0.00054 | 5.829767 |
| P02656 | 0 | 0.9362 | 495.6057 | 1484.802 | 2.53  | 0.00125  | 5.983118 |
| P02656 | 0 | 1      | 742.9045 | 1484.802 | 1.98  | 0.00147  | 10.57703 |
| P02656 | 0 | 1      | 761.0477 | 2281.129 | 1.28  | 0.00097  | 2.425762 |
| P02656 | 0 | 0.8816 | 620.9913 | 1860.959 | 3.27  | 0.00203  | 20.52575 |
| P02656 | 0 | 1      | 572.9587 | 1716.861 | 6.04  | 0.00346  | 50.35393 |
| P02656 | 0 | 0.8598 | 930.9808 | 1860.954 | 0.59  | 0.00055  | 3.548863 |
| P02656 | 0 | 0.8929 | 620.9894 | 1860.954 | 0.32  | 0.0002   | 4.585898 |
| P02656 | 0 | 0.902  | 620.9909 | 1860.958 | 2.68  | 0.00166  | 36.51932 |
| P02656 | 0 | 0.8148 | 620.9908 | 1860.958 | 2.58  | 0.0016   | 11.34842 |
| P02656 | 0 | 0.6481 | 593.8217 | 1186.636 | 1.28  | 0.00076  | 15.3524  |
| P02656 | 0 | 0.8718 | 495.6051 | 1484.801 | 1.36  | 0.00067  | 8.729263 |
| P02656 | 0 | 0.8857 | 495.6046 | 1484.799 | 0.25  | 0.00012  | 7.777669 |
| P02656 | 0 | 0.9818 | 670.8539 | 1340.7   | 2.84  | 0.0019   | 21.86194 |
| P02656 | 1 | 1      | 890.1232 | 2668.355 | 2.04  | 0.00181  | 3.022247 |
| P02656 | 0 | 1      | 495.6038 | 1484.797 | -1.23 | -0.00061 | 24.54805 |
| P02656 | 0 | 0.619  | 593.8224 | 1186.638 | 2.41  | 0.00143  | 100      |
| P02656 | 0 | 0.6522 | 620.9913 | 1860.959 | 3.37  | 0.00209  | 34.19717 |
| P02656 | 0 | 0.4412 | 593.8218 | 1186.636 | 1.38  | 0.00082  | 4.131884 |
| P02656 | 0 | 0.6923 | 593.8228 | 1186.638 | 3.03  | 0.0018   | 23.01978 |
| P02656 | 0 | 0.6512 | 593.8217 | 1186.636 | 1.28  | 0.00076  | 5.762704 |
| P02656 | 0 | 0.6071 | 593.822  | 1186.637 | 1.8   | 0.00107  | 32.81427 |
| P02656 | 0 | 0.7895 | 620.9908 | 1860.958 | 2.48  | 0.00154  | 4.094033 |
| P02656 | 0 | 1      | 858.9305 | 1716.854 | 1.5   | 0.00128  | 17.87755 |
| P05452 | 0 | 0.9302 | 534.662  | 1601.971 | -0.13 | -0.00007 | 23.18858 |
| P05452 | 0 | 0.9831 | 801.4912 | 1601.975 | 2.2   | 0.00176  | 33.21868 |
| P05452 | 0 | 0.9821 | 534.6631 | 1601.975 | 1.93  | 0.00103  | 11.3616  |
| P05452 | 0 | 0.9176 | 801.4913 | 1601.975 | 2.28  | 0.00182  | 7.669374 |
| P05452 | 0 | 1      | 484.5462 | 1451.624 | 1.5   | 0.00073  | 15.35178 |
| P05452 | 0 | 0.9844 | 611.9811 | 1833.929 | 3.69  | 0.00225  | 9.492293 |
| P05452 | 0 | 0.931  | 917.466  | 1833.925 | 1.43  | 0.00131  | 4.670127 |
| P05452 | 0 | 1      | 532.5801 | 1595.726 | 1.15  | 0.00061  | 12.67296 |
| P05452 | 0 | 1      | 532.5805 | 1595.727 | 1.84  | 0.00098  | 16.49493 |
| P05452 | 0 | 1      | 484.5461 | 1451.624 | 1.19  | 0.00057  | 2.882085 |
| P05452 | 0 | 0.6071 | 535.9661 | 1605.884 | -2.13 | -0.00114 | 41.79853 |
| P05452 | 0 | 1      | 726.3142 | 1451.621 | -0.65 | -0.00047 | 0        |
| P05452 | 0 | 1      | 484.5463 | 1451.624 | 1.63  | 0.00079  | 4.569598 |
| P05452 | 0 | 1      | 726.3152 | 1451.623 | 0.78  | 0.00056  | 0        |
| P05452 | 1 |        | 546.337  | 1091.667 | 0.48  | 0.00026  | 6.690168 |
| P05452 | 1 | 0.027  | 546.337  | 1091.667 | 0.48  | 0.00026  | 6.690168 |
| P05452 | 0 | 1      | 484.5465 | 1451.625 | 2.01  | 0.00097  | 5.928984 |
| P05452 | 1 | 0.7586 | 412.5949 | 1235.77  | 1.49  | 0.00061  | 32.89539 |
| P05452 | 0 | 1      | 726.3167 | 1451.626 | 2.79  | 0.00203  | 0        |
| P05452 | 0 | 0.7143 | 468.5916 | 1403.76  | 0.61  | 0.00029  | 0        |
| P05452 | 1 | 0.6667 | 618.3879 | 1235.769 | 0.22  | 0.00013  | 5.200743 |
| Q6UXB8 | 0 | 0.625  | 489.9291 | 1467.773 | 0.33  | 0.00016  | 38.85015 |
| Q6UXB8 | 0 | 0.9024 | 489.9297 | 1467.774 | 1.52  | 0.00074  | 16.42676 |
| Q6UXB8 | 0 | 1      | 968.5092 | 2903.513 | 2.35  | 0.00228  | 7.187781 |
| Q6UXB8 | 0 | 1      | 658.8442 | 1316.681 | 3.05  | 0.00201  | 0        |
| Q6UXB8 | 0 | 0.9655 | 439.565  | 1316.68  | 2.48  | 0.00109  | 13.92809 |
| Q6UXB8 | 0 | 1      | 494.9077 | 1482.709 | 0.9   | 0.00044  | 0        |
| Q6UXB8 | 0 | 0.95   | 477.9359 | 1431.793 | 2.19  | 0.00105  | 5.432574 |

|            |   |        |          |          |       |          |          |
|------------|---|--------|----------|----------|-------|----------|----------|
| Q6UXB8     | 0 | 1      | 563.2853 | 1687.841 | 2.17  | 0.00122  | 35.32702 |
| Q6UXB8     | 0 | 0.9535 | 734.3914 | 1467.775 | 2.21  | 0.00162  | 10.76006 |
| Q6UXB8     | 0 | 0.75   | 741.8581 | 1482.709 | 1.18  | 0.00087  | 0        |
| O00391     | 1 | 0.75   | 828.7732 | 2484.305 | 2.15  | 0.00178  | 71.58312 |
| O00391     | 0 | 1      | 731.0637 | 2191.176 | 1.71  | 0.00125  | 7.351919 |
| O00391     | 0 | 0.5172 | 548.9667 | 1644.885 | 1.18  | 0.00065  | 26.38286 |
| O00391     | 0 | 1      | 473.879  | 1419.623 | -0.01 | 0        | 0        |
| O00391     | 0 | 0.8182 | 518.3452 | 1035.683 | 2.48  | 0.00128  | 48.73775 |
| O00391     | 0 | 1      | 476.6089 | 1427.812 | 1.66  | 0.00079  | 31.30605 |
| O00391     | 0 | 1      | 1096.092 | 2191.177 | 2.11  | 0.00231  | 0        |
| P05154     | 0 | 0.9811 | 582.3491 | 1745.033 | 5.32  | 0.0031   | 37.22974 |
| P05154     | 0 | 1      | 568.3054 | 1702.902 | 5.65  | 0.00321  | 18.008   |
| P05154     | 0 | 0.9559 | 653.3438 | 1305.68  | 2.81  | 0.00184  | 5.178348 |
| P05154     | 0 | 0.9455 | 653.3428 | 1305.678 | 1.32  | 0.00086  | 8.775236 |
| P05154     | 0 | 0.8837 | 653.3439 | 1305.681 | 3     | 0.00196  | 20.51149 |
| P05154     | 0 | 0.9565 | 499.2495 | 1495.734 | 2.69  | 0.00134  | 18.63385 |
| P05154     | 0 | 0.2222 | 530.2871 | 1588.847 | 0.32  | 0.00017  | 5.666491 |
| P05154     | 0 | 0.625  | 646.3984 | 1291.789 | 2.39  | 0.00155  | 33.52577 |
| P05154     | 0 | 0.2273 | 530.2882 | 1588.85  | 2.51  | 0.00133  | 4.106297 |
| P05154     | 0 | 0.9615 | 499.2495 | 1495.734 | 2.76  | 0.00137  | 21.80467 |
| P12111     | 0 | 0.931  | 778.4375 | 2333.298 | 2.54  | 0.00198  | 10.05069 |
| P12111     | 0 | 0.9318 | 658.7308 | 1974.178 | 2.76  | 0.00182  | 9.931641 |
| P12111     | 0 | 1      | 625.7172 | 1875.137 | 3.39  | 0.00212  | 52.2477  |
| P12111     | 0 | 0.9688 | 573.9572 | 1719.857 | 2.56  | 0.00147  | 2.323016 |
| P12111     | 0 | 1      | 496.2538 | 991.5004 | 1.43  | 0.00071  | 4.987773 |
| P12111     | 1 | 1      | 379.4613 | 1514.823 | 1.88  | 0.00071  | 6.582224 |
| P19320     | 0 | 0.8833 | 646.0363 | 1936.094 | 3.15  | 0.00204  | 6.83571  |
| P19320     | 0 | 0.8409 | 677.3252 | 1353.643 | 2.09  | 0.00141  | 7.749067 |
| P19320; P4 | 0 | 0.54   | 566.3649 | 1131.722 | -0.23 | -0.00013 | 8.492911 |
| P19320     | 0 | 0.2778 | 573.3743 | 1145.741 | 2.63  | 0.0015   | 42.9141  |
| P19320     | 0 | 0.7917 | 554.6185 | 1661.841 | -2.21 | -0.00122 | 0        |
| P19320     | 0 | 1      | 552.6235 | 1655.856 | 0.94  | 0.00052  | 26.31883 |
| P08571     | 0 | 1      | 706.375  | 2117.11  | 5.17  | 0.00365  | 11.24365 |
| P08571     | 0 | 0.4545 | 624.8698 | 1248.732 | 2.64  | 0.00165  | 50.80756 |
| P08571     | 0 | 0.7561 | 693.3868 | 1385.766 | 1.97  | 0.00136  | 21.41239 |
| P08571     | 0 | 0.6087 | 462.594  | 1385.768 | 2.86  | 0.00132  | 75.718   |
| P08571     | 0 | 0.1429 | 761.4362 | 2282.294 | 1.27  | 0.00097  | 11.28704 |
| P08571     | 0 | 0.8    | 706.3733 | 2117.105 | 2.74  | 0.00194  | 6.2173   |
| P08571     | 0 | 0.3158 | 556.8143 | 1112.621 | 2.05  | 0.00114  | 7.441019 |
| P08571     | 0 | 1      | 715.3741 | 2144.108 | 1.78  | 0.00127  | 0        |
| Q9UK55     | 0 | 1      | 547.7511 | 2734.726 | 2.59  | 0.00142  | 17.53612 |
| Q9UK55     | 0 | 0.75   | 440.9165 | 1320.735 | 0.93  | 0.00041  | 12.63491 |
| Q9UK55     | 0 | 1      | 412.2183 | 1234.64  | 2.57  | 0.00106  | 31.22696 |
| Q9UK55     | 0 | 0.9756 | 747.4103 | 1493.813 | 2.97  | 0.00222  | 39.34453 |
| Q9UK55     | 0 | 0.9706 | 747.4087 | 1493.81  | 0.76  | 0.00057  | 30.36753 |
| Q9UK55     | 0 | 0.9583 | 574.9315 | 1722.78  | 3.6   | 0.00207  | 19.80302 |
| Q9UK55     | 0 | 0.8261 | 688.39   | 2063.155 | 1.23  | 0.00085  | 39.98726 |
| P07360     | 0 | 1      | 734.0147 | 2200.029 | 2.01  | 0.00148  | 2.233289 |
| P07360     | 0 | 1      | 734.0137 | 2200.027 | 0.76  | 0.00056  | 4.952258 |
| P07360     | 0 | 1      | 734.0145 | 2200.029 | 1.76  | 0.00129  | 10.54229 |
| P07360     | 0 | 0.8    | 528.3232 | 1582.955 | 2.08  | 0.0011   | 9.060866 |
| P07360     | 1 | 1      | 521.6293 | 1562.873 | 1.11  | 0.00058  | 9.402434 |



|            |   |        |          |          |       |          |          |
|------------|---|--------|----------|----------|-------|----------|----------|
| P07360     | 0 | 1      | 768.4039 | 2303.197 | 1.58  | 0.00121  | 2.703876 |
| P07360     | 0 | 1      | 768.3994 | 2303.184 | -4.23 | -0.00325 | 37.52563 |
| P07360     | 0 | 1      | 751.7325 | 2253.183 | 1.64  | 0.00123  | 4.190782 |
| P07360     | 0 | 0.907  | 588.9813 | 1764.929 | 2.59  | 0.00153  | 5.927134 |
| P07360     | 1 | 1      | 521.6298 | 1562.875 | 2.05  | 0.00107  | 21.03655 |
| P07360     | 0 | 0.65   | 751.7352 | 2253.191 | 5.14  | 0.00386  | 29.73279 |
| P07360     | 0 | 1      | 396.4942 | 1582.955 | 2.03  | 0.0008   | 42.47427 |
| P07360     | 1 | 1      | 521.6304 | 1562.877 | 3.22  | 0.00168  | 24.38052 |
| P07360     | 1 | 0.8966 | 391.4742 | 1562.875 | 2.31  | 0.0009   | 25.83555 |
| P07360     | 0 | 1      | 588.9813 | 1764.929 | 2.49  | 0.00146  | 2.219802 |
| P07360     | 0 | 0.9474 | 579.8124 | 1158.617 | 3.33  | 0.00193  | 0        |
| P07360     | 0 | 0.8824 | 576.5553 | 2303.199 | 2.58  | 0.00148  | 22.05381 |
| P07360     | 0 | 0.9048 | 579.8129 | 1158.618 | 4.18  | 0.00242  | 0        |
| P07360     | 0 | 0.9091 | 386.8765 | 1158.615 | 1.22  | 0.00047  | 19.45648 |
| P07360     | 0 | 0.7273 | 564.0516 | 2253.185 | 2.37  | 0.00133  | 7.591939 |
| P07360     | 0 | 0.9231 | 386.8769 | 1158.616 | 2.08  | 0.00081  | 34.41246 |
| P07360     | 0 | 0.8947 | 576.556  | 2303.202 | 3.85  | 0.00222  | 25.98046 |
| P69905     | 0 | 0.9844 | 558.6175 | 1673.838 | 0.94  | 0.00052  | 0        |
| P69905     | 1 | 1      | 535.329  | 1603.972 | -1.2  | -0.00064 | 36.94637 |
| P69905     | 0 | 0.9535 | 531.2802 | 2122.099 | 1.32  | 0.0007   | 7.071931 |
| P69905     | 0 | 1      | 495.255  | 1977.998 | 2.22  | 0.0011   | 20.77533 |
| P69905     | 0 | 1      | 558.6185 | 1673.841 | 2.8   | 0.00156  | 31.79922 |
| P69905     | 0 | 1      | 558.6181 | 1673.84  | 2.03  | 0.00113  | 8.392786 |
| P69905     | 0 | 0.3396 | 657.7462 | 3284.702 | 2.47  | 0.00162  | 2.783596 |
| P69905     | 0 | 1      | 680.3834 | 1359.76  | 0.82  | 0.00056  | 38.48998 |
| P69905     | 0 | 1      | 558.6185 | 1673.841 | 2.69  | 0.0015   | 30.51131 |
| P69905; P0 | 0 | 0.7719 | 553.8264 | 1106.646 | 0.68  | 0.00037  | 10.68246 |
| P69905; P0 | 0 | 0.7719 | 553.8285 | 1106.65  | 4.43  | 0.00245  | 9.041749 |
| P69905     | 0 | 1      | 608.3333 | 1215.659 | 2.33  | 0.00142  | 22.10156 |
| P69905     | 0 | 0.9259 | 459.256  | 1375.754 | 0.15  | 0.00007  | 20.88878 |
| P69905     | 0 | 0.84   | 514.3119 | 1540.921 | 1.47  | 0.00075  | 10.35098 |
| P69905     | 0 | 1      | 514.3123 | 1540.922 | 2.18  | 0.00112  | 13.44237 |
| P69905; P0 | 0 | 0.8462 | 481.7759 | 962.5444 | 1.74  | 0.00084  | 34.6242  |
| P69905     | 0 | 0.8571 | 531.281  | 2122.102 | 2.93  | 0.00155  | 10.92075 |
| P02654     | 0 | 0.878  | 497.2578 | 1489.759 | 1.57  | 0.00078  | 14.81891 |
| P02654     | 0 | 0.8596 | 745.3829 | 1489.759 | 1.38  | 0.00103  | 5.934212 |
| P02654     | 0 | 0.9804 | 745.3817 | 1489.756 | -0.26 | -0.0002  | 6.240797 |
| P02654     | 0 | 0.8356 | 673.3322 | 1345.657 | 1.9   | 0.00128  | 0        |
| P02654     | 1 | 0.8718 | 479.3005 | 1435.887 | 1.71  | 0.00082  | 10.77534 |
| P02654     | 0 | 0.8462 | 670.8518 | 1340.696 | 1.95  | 0.0013   | 2.743253 |
| P02654     | 0 | 0.8438 | 670.8512 | 1340.695 | 1.13  | 0.00075  | 5.239112 |
| P02654     | 0 | 0.873  | 670.8502 | 1340.693 | -0.42 | -0.00028 | 5.598434 |
| P02654     | 0 | 0.8986 | 670.8497 | 1340.692 | -1.06 | -0.00071 | 14.50503 |
| P02654     | 1 | 1      | 575.9982 | 1725.98  | 3.05  | 0.00175  | 9.467617 |
| P02654     | 1 | 0.8947 | 575.9977 | 1725.979 | 2.3   | 0.00133  | 15.25998 |
| P02654     | 1 | 0.1026 | 383.2322 | 1147.682 | 1.38  | 0.00053  | 8.709124 |
| P02654     | 1 | 0.8077 | 718.447  | 1435.887 | 1.63  | 0.00117  | 10.87461 |
| P02654     | 0 | 1      | 497.2574 | 1489.758 | 0.65  | 0.00032  | 10.89803 |
| P02654     | 0 | 0.8333 | 745.3795 | 1489.752 | -3.29 | -0.00245 | 37.86101 |
| P02654     | 0 | 0.6842 | 447.5701 | 1340.696 | 1.66  | 0.00074  | 12.05745 |
| P02654     | 0 | 0.6    | 525.8065 | 1050.606 | 2.31  | 0.00121  | 17.77835 |
| P02654     | 2 | 1      | 395.487  | 1578.926 | 1.48  | 0.00058  | 0        |

|        |   |        |          |          |       |          |          |
|--------|---|--------|----------|----------|-------|----------|----------|
| P02654 | 0 | 1      | 497.2575 | 1489.758 | 0.84  | 0.00041  | 7.796483 |
| P02654 | 0 | 0.902  | 598.8007 | 1196.594 | 2.19  | 0.00131  | 5.507139 |
| P02654 | 1 | 1      | 592.9722 | 1776.902 | 2.15  | 0.00127  | 30.33248 |
| P02654 | 0 | 0.6047 | 525.8063 | 1050.605 | 1.96  | 0.00103  | 9.785151 |
| P02654 | 0 | 0.8636 | 497.2568 | 1489.756 | -0.39 | -0.0002  | 3.015112 |
| P02654 | 0 | 0.875  | 497.2577 | 1489.759 | 1.39  | 0.00069  | 25.30824 |
| P02654 | 0 | 0.6875 | 670.8527 | 1340.698 | 3.31  | 0.00222  | 0        |
| P02654 | 2 | 1      | 395.487  | 1578.926 | 1.48  | 0.00058  | 0        |
| P02654 | 0 | 0.7027 | 525.8064 | 1050.606 | 2.08  | 0.00109  | 10.22051 |
| P02654 | 0 | 1      | 673.3328 | 1345.658 | 2.89  | 0.00195  | 19.67318 |
| P00742 | 0 | 0.8235 | 495.9291 | 1485.773 | 1.42  | 0.0007   | 8.302235 |
| P00742 | 0 | 1      | 536.9429 | 1608.814 | 1.62  | 0.00087  | 12.10183 |
| P00742 | 0 | 1      | 701.3602 | 1401.713 | 2.25  | 0.00158  | 4.826756 |
| P00742 | 0 | 0.963  | 467.9092 | 1401.713 | 2.33  | 0.00109  | 5.968043 |
| P00742 | 0 | 1      | 688.0002 | 2061.986 | 2.01  | 0.00138  | 0        |
| P00742 | 0 | 0.9767 | 687.9982 | 2061.98  | -1.01 | -0.00069 | 9.272799 |
| P00742 | 0 | 0.8846 | 589.8268 | 1178.646 | 1.91  | 0.00113  | 9.58318  |
| P00742 | 0 | 1      | 743.39   | 1485.773 | 1.47  | 0.00109  | 29.34441 |
| P00742 | 0 | 0.5581 | 633.3389 | 1265.67  | 1.93  | 0.00122  | 3.963283 |
| P00742 | 0 | 0.7419 | 422.5619 | 1265.671 | 2.52  | 0.00106  | 7.715523 |
| P00742 | 0 | 0.8966 | 519.2976 | 1037.588 | 1.86  | 0.00097  | 24.02707 |
| P00742 | 0 | 0.8636 | 517.776  | 1034.545 | 2.55  | 0.00132  | 24.67109 |
| P00742 | 0 | 0.8649 | 447.2467 | 893.4861 | 2.38  | 0.00106  | 25.03457 |
| P00742 | 0 | 0.6774 | 633.3394 | 1265.671 | 2.7   | 0.00171  | 4.380492 |
| P00742 | 0 | 1      | 536.942  | 1608.812 | -0.08 | -0.00004 | 29.5193  |
| Q96KN2 | 0 | 1      | 799.0972 | 2395.277 | 2.6   | 0.00208  | 9.669096 |
| Q96KN2 | 0 | 1      | 718.3729 | 2153.104 | 1.66  | 0.00119  | 36.91257 |
| Q96KN2 | 0 | 0.9167 | 764.4538 | 1527.9   | 1.22  | 0.00093  | 19.74153 |
| Q96KN2 | 0 | 0.8958 | 764.4543 | 1527.901 | 1.86  | 0.00142  | 17.95419 |
| Q96KN2 | 0 | 0.9091 | 457.5845 | 1370.739 | 1.42  | 0.00065  | 3.076419 |
| Q96KN2 | 0 | 0.8889 | 450.906  | 1350.703 | 3.24  | 0.00146  | 40.52431 |
| Q96KN2 | 0 | 1      | 432.2628 | 1294.774 | 1.36  | 0.00059  | 11.68979 |
| Q96KN2 | 0 | 0.697  | 509.9712 | 1527.899 | 0.31  | 0.00016  | 11.6621  |
| Q96KN2 | 0 | 0.9643 | 599.5761 | 2395.283 | 4.97  | 0.00297  | 10.66611 |
| Q96KN2 | 0 | 1      | 440.5853 | 1319.741 | 2.16  | 0.00095  | 25.28683 |
| Q96KN2 | 0 | 0.8438 | 457.5837 | 1370.736 | -0.52 | -0.00024 | 0        |
| P17936 | 0 | 1      | 656.3506 | 1967.037 | 2.49  | 0.00164  | 2.203538 |
| P17936 | 0 | 1      | 756.9196 | 1512.832 | 1.19  | 0.0009   | 36.48552 |
| P17936 | 1 | 1      | 437.8799 | 1311.625 | 1.59  | 0.00069  | 9.573146 |
| P17936 | 0 | 0.9556 | 545.3314 | 1089.656 | 1.72  | 0.00094  | 3.958177 |
| P17936 | 0 | 1      | 656.3513 | 1967.039 | 3.61  | 0.00237  | 3.022174 |
| P17936 | 0 | 0.8485 | 443.2396 | 1327.704 | 0.87  | 0.00039  | 16.73485 |
| P17936 | 0 | 1      | 656.3521 | 1967.042 | 4.82  | 0.00316  | 47.64048 |
| P17936 | 0 | 0.9355 | 385.2296 | 1153.674 | 1.96  | 0.00076  | 21.46969 |
| P17936 | 0 | 1      | 656.3502 | 1967.036 | 1.84  | 0.00121  | 9.594666 |
| P17936 | 0 | 0.8    | 780.6988 | 2340.082 | 4.31  | 0.00336  | 31.58427 |
| P17936 | 0 | 1      | 577.3422 | 1153.677 | 4.46  | 0.00257  | 0        |
| O00533 | 0 | 0.9756 | 840.4498 | 2519.335 | 1.75  | 0.00147  | 3.379233 |
| O00533 | 0 | 0.9143 | 421.975  | 1684.878 | 1.65  | 0.00069  | 26.46294 |
| O00533 | 0 | 1      | 481.9526 | 1443.843 | 1.61  | 0.00078  | 25.40402 |
| O00533 | 0 | 0.9231 | 504.9055 | 1512.702 | 1.99  | 0.001    | 23.19218 |
| O00533 | 0 | 1      | 517.9416 | 1551.81  | 3.65  | 0.00189  | 22.47573 |

|        |   |        |          |          |       |          |          |
|--------|---|--------|----------|----------|-------|----------|----------|
| O00533 | 0 | 0.8571 | 581.3198 | 1741.945 | 0.71  | 0.00041  | 0        |
| O00533 | 0 | 0.88   | 524.9433 | 1572.815 | 0.35  | 0.00019  | 0        |
| P02652 | 1 | 0.963  | 530.3388 | 1589.002 | 1.19  | 0.00063  | 25.10849 |
| P02652 | 1 | 0.9583 | 530.3388 | 1589.002 | 1.19  | 0.00063  | 10.96668 |
| P02652 | 1 | 0.8    | 398.0058 | 1589.001 | 0.91  | 0.00036  | 9.180206 |
| P02652 | 1 | 0.9615 | 530.3392 | 1589.003 | 2     | 0.00106  | 26.62607 |
| P02652 | 0 | 1      | 832.0704 | 2494.197 | 1.5   | 0.00125  | 2.82802  |
| P02652 | 0 | 1      | 1247.6   | 2494.194 | 0.33  | 0.00042  | 0        |
| P02652 | 0 | 1      | 1319.653 | 2638.299 | 1.42  | 0.00188  | 4.611726 |
| P02652 | 1 | 1      | 544.662  | 1631.971 | 1.34  | 0.00073  | 8.625198 |
| P02652 | 1 | 1      | 544.6608 | 1631.968 | -0.9  | -0.00049 | 7.235825 |
| P02652 | 1 | 1      | 701.131  | 2801.502 | 2.14  | 0.0015   | 6.646177 |
| P02652 | 0 | 0.807  | 630.8569 | 1260.707 | 2.23  | 0.00141  | 17.98664 |
| P02652 | 0 | 0.9014 | 630.8552 | 1260.703 | -0.58 | -0.00036 | 5.575297 |
| P02652 | 0 | 0.8929 | 630.8552 | 1260.703 | -0.58 | -0.00036 | 5.708681 |
| P02652 | 0 | 0.8462 | 630.8552 | 1260.703 | -0.48 | -0.0003  | 5.530602 |
| P02652 | 0 | 0.6591 | 420.9059 | 1260.703 | -0.54 | -0.00023 | 8.431663 |
| P02652 | 0 | 0.8824 | 630.857  | 1260.707 | 2.33  | 0.00147  | 8.421275 |
| P02652 | 0 | 0.8889 | 630.8572 | 1260.707 | 2.62  | 0.00165  | 6.389449 |
| P02652 | 0 | 0.8889 | 630.8569 | 1260.707 | 2.23  | 0.00141  | 8.782099 |
| P02652 | 0 | 0.9074 | 630.8568 | 1260.706 | 1.94  | 0.00122  | 19.80364 |
| P02652 | 0 | 1      | 843.7726 | 2529.303 | 1.6   | 0.00135  | 2.054648 |
| P02652 | 0 | 1      | 880.104  | 2638.297 | 0.98  | 0.00086  | 10.27286 |
| P02652 | 0 | 0.8833 | 558.8059 | 1116.604 | 2.42  | 0.00135  | 3.238775 |
| P02652 | 1 | 0.1389 | 496.628  | 1487.87  | 1.58  | 0.00079  | 13.77181 |
| P02652 | 0 | 0.9322 | 558.806  | 1116.605 | 2.64  | 0.00147  | 36.40206 |
| P02652 | 0 | 0.8868 | 630.8578 | 1260.708 | 3.59  | 0.00226  | 5.058565 |
| P02652 | 0 | 0.9333 | 630.8575 | 1260.708 | 3.2   | 0.00202  | 68.03008 |
| P02652 | 0 | 0.7381 | 615.3912 | 1229.775 | 3.53  | 0.00217  | 6.764525 |
| P02652 | 0 | 0.6316 | 420.9059 | 1260.703 | -0.54 | -0.00023 | 7.916655 |
| P02652 | 0 | 0.6552 | 420.9074 | 1260.707 | 2.95  | 0.00124  | 15.40078 |
| P02652 | 1 | 0.5263 | 530.3388 | 1589.002 | 1.19  | 0.00063  | 46.0147  |
| P02652 | 1 | 1      | 530.3373 | 1588.997 | -1.46 | -0.00077 | 34.3315  |
| P02652 | 0 | 0.6053 | 420.906  | 1260.703 | -0.32 | -0.00013 | 8.649993 |
| P02652 | 1 | 0.7436 | 795.0046 | 1589.002 | 1.32  | 0.00104  | 7.867902 |
| P02652 | 0 | 0.5161 | 410.596  | 1229.774 | 2.3   | 0.00094  | 0        |
| P02652 | 0 | 0.5152 | 410.5952 | 1229.771 | 0.22  | 0.00009  | 0        |
| P02652 | 0 | 1      | 880.0996 | 2638.284 | -4.02 | -0.00354 | 29.53219 |
| P02652 | 1 | 0.675  | 482.3048 | 1444.9   | 1.36  | 0.00066  | 10.43697 |
| P02652 | 1 | 1      | 530.338  | 1588.999 | -0.19 | -0.0001  | 26.90374 |
| P02652 | 1 | 0.675  | 482.3048 | 1444.9   | 1.36  | 0.00066  | 10.43697 |
| P02652 | 0 | 0.7059 | 420.9065 | 1260.705 | 0.99  | 0.00041  | 5.477408 |
| P02652 | 0 | 0.84   | 615.3889 | 1229.77  | -0.25 | -0.00015 | 14.45453 |
| P02652 | 0 | 0.7143 | 420.9067 | 1260.706 | 1.49  | 0.00063  | 22.12584 |
| P02652 | 1 | 0.7727 | 482.3044 | 1444.899 | 0.54  | 0.00026  | 44.00708 |
| P02652 | 0 | 0.6829 | 543.3396 | 1085.672 | 2.99  | 0.00163  | 3.728235 |
| P02652 | 0 | 0.9333 | 1265.158 | 2529.308 | 3.49  | 0.00441  | 9.201798 |
| P02652 | 2 | 0.8824 | 466.0549 | 1861.198 | 0.52  | 0.00024  | 3.748977 |
| P02652 | 0 | 0.5806 | 410.5951 | 1229.771 | 0.07  | 0.00003  | 8.954934 |
| P02652 | 0 | 0.6207 | 420.9074 | 1260.707 | 2.95  | 0.00124  | 27.44842 |
| P02652 | 1 | 0.5294 | 530.34   | 1589.005 | 3.5   | 0.00185  | 36.13976 |
| P02652 | 0 | 0.8571 | 615.3889 | 1229.771 | -0.15 | -0.00009 | 5.542968 |

|        |   |        |          |          |       |          |          |
|--------|---|--------|----------|----------|-------|----------|----------|
| P02652 | 1 | 1      | 408.7473 | 1631.967 | -1.1  | -0.00045 | 37.86441 |
| P02652 | 0 | 0.6538 | 420.9069 | 1260.706 | 1.86  | 0.00078  | 6.528193 |
| P02652 | 1 | 0.7647 | 530.3383 | 1589     | 0.38  | 0.0002   | 43.63034 |
| P02652 | 1 | 0.3571 | 530.3395 | 1589.004 | 2.57  | 0.00136  | 45.25055 |
| P02652 | 0 | 0.7333 | 630.8572 | 1260.707 | 2.72  | 0.00171  | 51.25354 |
| P02652 | 1 | 0.25   | 530.3381 | 1589     | 0.04  | 0.00002  | 39.17081 |
| P02652 | 0 | 0.5517 | 420.9069 | 1260.706 | 1.93  | 0.00081  | 11.04731 |
| P02652 | 0 | 0.5862 | 615.3909 | 1229.775 | 3.13  | 0.00192  | 0        |
| P02652 | 1 | 0.6667 | 496.6276 | 1487.868 | 0.72  | 0.00036  | 59.65875 |
| P02652 | 1 | 0.6667 | 496.6276 | 1487.868 | 0.72  | 0.00036  | 59.65875 |
| P02652 | 0 | 0.75   | 420.9067 | 1260.705 | 1.35  | 0.00057  | 31.79425 |
| P02652 | 0 | 0.7429 | 543.3394 | 1085.672 | 2.66  | 0.00144  | 44.34234 |
| P02652 | 0 | 0.8636 | 420.9064 | 1260.705 | 0.62  | 0.00026  | 9.623656 |
| O75636 | 0 | 0.9167 | 584.7983 | 1168.589 | 2.18  | 0.00127  | 3.107245 |
| O75636 | 0 | 1      | 629.3304 | 1257.653 | 3.04  | 0.00191  | 1.396681 |
| O75636 | 0 | 1      | 419.8889 | 1257.652 | 1.94  | 0.00081  | 7.103546 |
| O75636 | 0 | 1      | 615.3573 | 1844.057 | 2.9   | 0.00178  | 8.683725 |
| O75636 | 0 | 0.8923 | 445.5835 | 1334.736 | 3.95  | 0.00176  | 15.93118 |
| O75636 | 0 | 1      | 1177.911 | 3531.718 | 0.65  | 0.00076  | 0        |
| O75636 | 0 | 1      | 883.6854 | 3531.72  | 1.04  | 0.00092  | 3.123639 |
| O75636 | 0 | 1      | 445.5833 | 1334.735 | 3.4   | 0.00151  | 53.92889 |
| O75636 | 0 | 1      | 814.7298 | 2442.175 | 1.88  | 0.00153  | 10.49986 |
| O75636 | 0 | 0.94   | 607.801  | 1214.595 | 2.11  | 0.00128  | 6.662632 |
| O75636 | 0 | 1      | 651.6976 | 1953.078 | 3.28  | 0.00214  | 6.688876 |
| O75636 | 0 | 1      | 419.8888 | 1257.652 | 1.72  | 0.00072  | 20.14346 |
| O75636 | 0 | 1      | 419.8892 | 1257.653 | 2.66  | 0.00112  | 29.38592 |
| O75636 | 0 | 1      | 512.7476 | 1024.488 | 3.09  | 0.00159  | 20.37806 |
| O75636 | 0 | 0.7059 | 461.7705 | 1844.06  | 4.52  | 0.00208  | 24.66369 |
| O75636 | 0 | 1      | 651.6966 | 1953.075 | 1.78  | 0.00116  | 67.19032 |
| O75636 | 0 | 0.8571 | 629.3301 | 1257.653 | 2.65  | 0.00167  | 0        |
| P43251 | 0 | 0.9873 | 612.3843 | 1223.761 | 1.78  | 0.00109  | 0        |
| P43251 | 0 | 0.92   | 456.6261 | 1367.864 | 1.73  | 0.00079  | 44.87801 |
| P43251 | 0 | 0.8286 | 456.6255 | 1367.862 | 0.39  | 0.00018  | 12.41496 |
| P43251 | 0 | 0.825  | 451.5606 | 1352.667 | 1.68  | 0.00076  | 19.22727 |
| P43251 | 0 | 1      | 1032.862 | 3096.571 | 4.04  | 0.00417  | 0        |
| P43251 | 0 | 0.9744 | 456.6276 | 1367.868 | 5.01  | 0.00229  | 21.11179 |
| P43251 | 0 | 1      | 684.4368 | 1367.866 | 3.73  | 0.00255  | 9.300961 |
| P43251 | 0 | 0.8136 | 735.3832 | 1469.759 | 2.98  | 0.00219  | 10.31168 |
| P43251 | 0 | 0.96   | 564.2695 | 1690.794 | -0.36 | -0.0002  | 15.92303 |
| P43251 | 0 | 0.9459 | 564.2702 | 1690.796 | 0.94  | 0.00053  | 46.81824 |
| P43251 | 0 | 0.8684 | 518.6259 | 1553.863 | 2.08  | 0.00108  | 25.06315 |
| P43251 | 0 | 0.8462 | 798.433  | 1595.859 | 2.41  | 0.00192  | 0        |
| P43251 | 0 | 0.8444 | 408.5918 | 1223.761 | 1.4   | 0.00057  | 9.877079 |
| P43251 | 0 | 0.6176 | 484.6171 | 1451.837 | 1.99  | 0.00097  | 12.88708 |
| P43251 | 0 | 0.4286 | 798.4324 | 1595.858 | 1.64  | 0.00131  | 7.004591 |
| P43251 | 0 | 0.8    | 777.436  | 1553.865 | 3.03  | 0.00236  | 13.22548 |
| P04278 | 0 | 0.9875 | 709.6945 | 2127.069 | 2.5   | 0.00177  | 9.663723 |
| P04278 | 0 | 1      | 709.6943 | 2127.068 | 2.16  | 0.00153  | 17.69253 |
| P04278 | 0 | 0.8868 | 553.3453 | 1105.683 | 1.23  | 0.00068  | 5.537842 |
| P04278 | 0 | 0.9231 | 793.4822 | 1585.957 | 1.63  | 0.00129  | 5.632803 |
| P04278 | 0 | 1      | 492.2718 | 1474.801 | 1.85  | 0.00091  | 22.55259 |
| P04278 | 0 | 1      | 887.5464 | 2660.625 | 1.57  | 0.00139  | 15.37864 |

|        |   |        |          |          |       |          |          |
|--------|---|--------|----------|----------|-------|----------|----------|
| P04278 | 0 | 1      | 520.0789 | 2596.365 | 1.61  | 0.00083  | 33.87479 |
| P04278 | 0 | 1      | 520.0792 | 2596.367 | 2.2   | 0.00114  | 22.98778 |
| P04278 | 0 | 1      | 405.2369 | 1213.696 | 2.34  | 0.00094  | 8.898788 |
| P04278 | 0 | 1      | 648.8319 | 1296.656 | 2.87  | 0.00186  | 25.54552 |
| P04278 | 0 | 0.8276 | 553.3464 | 1105.685 | 3.21  | 0.00178  | 38.45863 |
| O95445 | 1 | 1      | 502.5279 | 2007.09  | -0.21 | -0.00011 | 9.390475 |
| O95445 | 0 | 1      | 578.9704 | 1734.897 | 2.01  | 0.00117  | 25.36809 |
| O95445 | 0 | 1      | 578.9706 | 1734.897 | 2.33  | 0.00135  | 9.093753 |
| O95445 | 0 | 0.9773 | 578.9707 | 1734.898 | 2.54  | 0.00147  | 16.11567 |
| O95445 | 0 | 0.9773 | 867.9512 | 1734.895 | 1.18  | 0.00102  | 0        |
| O95445 | 0 | 0.8182 | 850.4544 | 2549.348 | 2.12  | 0.0018   | 0        |
| O95445 | 0 | 1      | 808.4101 | 3230.619 | 2.81  | 0.00227  | 6.492002 |
| O95445 | 0 | 0.9365 | 649.8476 | 1298.688 | 1.16  | 0.00075  | 5.899256 |
| O95445 | 0 | 0.9722 | 578.9708 | 1734.898 | 2.65  | 0.00153  | 73.89592 |
| O95445 | 0 | 0.7368 | 433.5678 | 1298.689 | 1.97  | 0.00085  | 13.88651 |
| O95445 | 0 | 1      | 661.7928 | 1322.578 | 1.5   | 0.001    | 12.91227 |
| O95445 | 0 | 1      | 850.4528 | 2549.344 | 0.32  | 0.00027  | 5.890569 |
| O95445 | 0 | 1      | 407.8889 | 1221.652 | 1.67  | 0.00068  | 10.65826 |
| O95445 | 0 | 0.8182 | 407.8887 | 1221.651 | 1.22  | 0.0005   | 9.773503 |
| O95445 | 0 | 1      | 661.7927 | 1322.578 | 1.32  | 0.00087  | 56.37947 |
| O95445 | 0 | 0.898  | 409.2511 | 817.4949 | 2.21  | 0.0009   | 7.144684 |
| O95445 | 0 | 0.8108 | 577.798  | 1154.589 | 3.85  | 0.00222  | 31.20136 |
| P23142 | 0 | 0.9643 | 565.3195 | 1693.944 | 2.74  | 0.00155  | 8.126082 |
| P23142 | 0 | 0.8438 | 440.5541 | 1319.648 | 1.17  | 0.00052  | 11.44509 |
| P23142 | 0 | 1      | 694.0154 | 2080.032 | 1.61  | 0.00112  | 9.129058 |
| P23142 | 0 | 1      | 737.6536 | 2210.946 | 1.88  | 0.00138  | 5.394526 |
| P23142 | 0 | 1      | 737.6533 | 2210.945 | 1.55  | 0.00114  | 25.79776 |
| P23142 | 0 | 1      | 440.5546 | 1319.649 | 2.42  | 0.00107  | 43.00533 |
| P23142 | 0 | 1      | 727.8196 | 1454.632 | 0.92  | 0.00067  | 6.089577 |
| P23142 | 0 | 1      | 872.6451 | 3487.558 | 0.17  | 0.00014  | 0        |
| P23142 | 0 | 1      | 460.5366 | 1379.595 | 2.32  | 0.00107  | 39.54801 |
| P23142 | 0 | 0.7419 | 632.3632 | 1263.719 | 3.45  | 0.00218  | 0        |
| P23142 | 0 | 1      | 737.653  | 2210.944 | 1.05  | 0.00077  | 76.07219 |
| P23142 | 0 | 0.7742 | 421.9101 | 1263.716 | 0.91  | 0.00038  | 19.28104 |
| P15169 | 0 | 0.7955 | 376.2289 | 1126.672 | 1.88  | 0.00071  | 28.3273  |
| P15169 | 0 | 0.86   | 615.3716 | 1229.736 | 2.12  | 0.00131  | 100      |
| P15169 | 0 | 0.9032 | 509.0213 | 2033.063 | 1.89  | 0.00096  | 6.820088 |
| P15169 | 0 | 1      | 526.5929 | 1577.764 | 1.93  | 0.00102  | 0        |
| P15169 | 0 | 0.9535 | 615.3716 | 1229.736 | 2.03  | 0.00125  | 10.49718 |
| P15169 | 0 | 0.9091 | 509.0206 | 2033.06  | 0.45  | 0.00023  | 64.02462 |
| P15169 | 0 | 0.8125 | 439.8955 | 1317.672 | 1.38  | 0.00061  | 22.91768 |
| P15169 | 0 | 0.6538 | 440.9022 | 1320.692 | 2.65  | 0.00117  | 37.38174 |
| P15169 | 0 | 0.8636 | 543.3208 | 1085.634 | 2.75  | 0.0015   | 0        |
| P15169 | 0 | 0.7647 | 545.2876 | 1089.568 | 2.07  | 0.00113  | 0        |
| P15169 | 0 | 0.9231 | 509.0215 | 2033.064 | 2.31  | 0.00117  | 8.721296 |
| P15169 | 0 | 0.8462 | 838.949  | 3352.774 | 0.79  | 0.00066  | 5.757579 |
| P15169 | 0 | 0.7955 | 563.8401 | 1126.673 | 2.51  | 0.00142  | 3.50319  |
| P15169 | 0 | 0.7143 | 678.3601 | 2033.066 | 2.97  | 0.00202  | 9.448347 |
| P48740 | 0 | 0.9787 | 677.3333 | 2029.985 | 2.03  | 0.00137  | 7.780985 |
| P48740 | 0 | 0.8868 | 498.7614 | 1992.024 | 1.3   | 0.00065  | 0        |
| P48740 | 0 | 1      | 664.68   | 1992.025 | 2.17  | 0.00144  | 53.43182 |
| P48740 | 0 | 0.88   | 498.7629 | 1992.03  | 4.25  | 0.00211  | 16.06669 |

|            |   |        |          |          |       |          |          |
|------------|---|--------|----------|----------|-------|----------|----------|
| P48740     | 0 | 0.9062 | 515.2734 | 1543.806 | 6.68  | 0.00344  | 6.147194 |
| P48740; PO | 0 | 1      | 564.259  | 1127.511 | 1.99  | 0.00112  | 2.876967 |
| P48740     | 0 | 0.8947 | 647.8574 | 1294.708 | 0.63  | 0.00041  | 20.98335 |
| P48740     | 0 | 0.9444 | 756.3977 | 1511.788 | 3.3   | 0.00249  | 3.826502 |
| P48740     | 0 | 0.9429 | 606.3044 | 1211.601 | 1.03  | 0.00062  | 0        |
| P48740     | 0 | 0.6333 | 509.2458 | 1525.723 | -0.53 | -0.00027 | 49.05505 |
| P48740     | 0 | 1      | 515.2687 | 1543.791 | -2.57 | -0.00132 | 45.6151  |
| P48740     | 0 | 1      | 577.3238 | 1729.957 | -0.85 | -0.00049 | 0        |
| P09172     | 0 | 0.7391 | 475.6256 | 1424.862 | 0.4   | 0.00019  | 10.34492 |
| P09172     | 0 | 1      | 505.6318 | 1514.881 | 1.79  | 0.00091  | 52.01717 |
| P09172     | 0 | 0.6923 | 441.9221 | 1323.752 | 0.42  | 0.00019  | 19.84711 |
| P09172     | 0 | 0.9667 | 775.0815 | 2323.23  | 1.11  | 0.00086  | 0        |
| P09172     | 0 | 1      | 715.3629 | 2144.074 | -1.58 | -0.00113 | 0        |
| P09172     | 1 | 0.7407 | 401.2796 | 1201.824 | 0.75  | 0.0003   | 7.528913 |
| P09172     | 0 | 1      | 757.9434 | 1514.879 | 0.92  | 0.00069  | 10.35315 |
| P09172     | 0 | 1      | 602.9788 | 1806.922 | 1.83  | 0.0011   | 43.25351 |
| P09172     | 0 | 0.9286 | 455.7541 | 1819.995 | 0.55  | 0.00025  | 16.27107 |
| P00748     | 0 | 1      | 824.7258 | 2472.163 | 1.39  | 0.00115  | 7.865944 |
| P00748     | 0 | 1      | 714.0139 | 2140.027 | 1.04  | 0.00074  | 27.26283 |
| P00748     | 0 | 1      | 473.5684 | 1418.691 | 2.76  | 0.0013   | 58.95689 |
| P00748     | 0 | 0.8571 | 560.8054 | 2240.2   | 2.32  | 0.0013   | 0        |
| P00748     | 0 | 1      | 385.8657 | 1155.583 | 1.37  | 0.00053  | 26.3201  |
| P00748     | 0 | 1      | 473.5675 | 1418.688 | 0.82  | 0.00039  | 31.95839 |
| P00748     | 0 | 1      | 381.8621 | 1143.572 | 1.68  | 0.00064  | 30.3688  |
| P00748     | 0 | 1      | 514.3414 | 1027.676 | 1.13  | 0.00058  | 22.56754 |
| P00748     | 0 | 0.6944 | 536.3004 | 1071.594 | 1.93  | 0.00103  | 6.621604 |
| P04220; PO | 0 | 1      | 465.2515 | 1393.74  | 1.57  | 0.00073  | 32.03212 |
| P04220; PO | 0 | 0.9273 | 697.3748 | 1393.742 | 3.16  | 0.0022   | 16.76457 |
| P04220; PO | 0 | 1      | 640.0442 | 1918.118 | 1.93  | 0.00123  | 5.983711 |
| P04220; PO | 0 | 1      | 480.2844 | 1918.116 | 0.81  | 0.00039  | 4.934416 |
| P04220; PO | 0 | 1      | 480.2846 | 1918.117 | 1.19  | 0.00057  | 26.15992 |
| P04220; PO | 0 | 1      | 625.3226 | 1249.638 | 1.78  | 0.00111  | 5.815742 |
| P04220; PO | 0 | 0.8333 | 502.0225 | 2005.068 | 0.74  | 0.00037  | 33.76444 |
| P04220; PO | 0 | 0.9848 | 669.0283 | 2005.07  | 1.78  | 0.00119  | 7.875226 |
| P04220; PO | 0 | 1      | 963.5733 | 1926.139 | 2.63  | 0.00253  | 9.84608  |
| P04220; PO | 0 | 1      | 582.2993 | 1744.883 | 1.35  | 0.00078  | 2.909007 |
| P04220; PO | 0 | 0.5556 | 585.8173 | 1170.627 | 2.38  | 0.00139  | 7.087362 |
| P04220; PO | 0 | 1      | 575.8695 | 1150.732 | 2.78  | 0.0016   | 5.647379 |
| P04220; PO | 0 | 1      | 500.2838 | 999.5604 | 1.23  | 0.00061  | 0        |
| P04220; PO | 0 | 0.9333 | 381.8922 | 1143.662 | 0.87  | 0.00033  | 23.20232 |
| P04220; PO | 0 | 0.5424 | 585.8171 | 1170.627 | 2.17  | 0.00127  | 20.0987  |
| P04220; PO | 0 | 0.8333 | 642.7177 | 1926.138 | 2.15  | 0.00138  | 8.946026 |
| P04220; PO | 0 | 0.8947 | 450.7702 | 900.5332 | 3.36  | 0.00151  | 18.34709 |
| P04220; PO | 0 | 1      | 582.3002 | 1744.886 | 3.02  | 0.00176  | 0        |
| P04220; PO | 0 | 1      | 575.8695 | 1150.732 | 2.68  | 0.00154  | 7.036704 |
| P04220; PO | 0 | 0.9333 | 669.0283 | 2005.07  | 1.87  | 0.00125  | 0        |
| P04220; PO | 0 | 1      | 502.0216 | 2005.064 | -1.09 | -0.00055 | 0        |
| P04220; PO | 0 | 0.6286 | 522.8208 | 1044.634 | 2.01  | 0.00105  | 27.21322 |
| P04220; PO | 0 | 1      | 500.2843 | 999.5613 | 2.15  | 0.00107  | 0        |
| P04220; PO | 0 | 1      | 640.0452 | 1918.121 | 3.46  | 0.00221  | 0        |
| P04220; PO | 0 | 0.9474 | 669.031  | 2005.078 | 5.89  | 0.00394  | 70.9072  |
| P04220; PO | 0 | 1      | 572.3357 | 1143.664 | 2.56  | 0.00146  | 23.70536 |

|            |   |        |          |          |       |          |          |
|------------|---|--------|----------|----------|-------|----------|----------|
| P04220; PO | 0 | 0.8214 | 522.8209 | 1044.634 | 2.13  | 0.00111  | 0        |
| P04220; PO | 0 | 0.9688 | 384.2483 | 1150.73  | 1.47  | 0.00056  | 5.071266 |
| P04220; PO | 0 | 1      | 575.8692 | 1150.731 | 2.25  | 0.0013   | 0        |
| P04220; PO | 0 | 0.84   | 522.8204 | 1044.634 | 1.31  | 0.00068  | 53.48961 |
| P04220; PO | 0 | 1      | 572.3355 | 1143.664 | 2.13  | 0.00122  | 0        |
| P04220; PO | 0 | 0.8276 | 522.8203 | 1044.633 | 0.96  | 0.0005   | 23.53466 |
| P04220; PO | 0 | 0.7273 | 522.8204 | 1044.633 | 1.19  | 0.00062  | 6.409844 |
| P20851     | 0 | 0.7188 | 614.989  | 1842.952 | 2.19  | 0.00134  | 16.67333 |
| P20851     | 0 | 0.987  | 776.6318 | 3103.505 | -1.75 | -0.00136 | 2.447053 |
| P20851     | 0 | 0.9423 | 1035.175 | 3103.511 | -0.04 | -0.00004 | 20.21488 |
| P20851     | 0 | 1      | 792.0577 | 2374.158 | 0.95  | 0.00075  | 4.226348 |
| P20851     | 0 | 0.9459 | 633.0182 | 1897.04  | 3.01  | 0.00191  | 44.35191 |
| P20851     | 0 | 0.9535 | 633.0176 | 1897.038 | 2.14  | 0.00136  | 45.97803 |
| P20851     | 0 | 0.9333 | 469.2657 | 1874.041 | -0.37 | -0.00017 | 11.42643 |
| P20851     | 0 | 1      | 625.3538 | 1874.047 | 2.67  | 0.00167  | 10.20266 |
| P20851     | 0 | 1      | 469.2657 | 1874.041 | -0.5  | -0.00023 | 30.311   |
| P20851     | 0 | 1      | 1022.498 | 2043.989 | -0.89 | -0.00091 | 5.887505 |
| P20851     | 0 | 0.8929 | 432.259  | 1294.763 | 1.27  | 0.00055  | 62.45133 |
| P20851     | 0 | 0.8889 | 647.8854 | 1294.763 | 1.99  | 0.00129  | 28.60997 |
| P20851     | 0 | 0.2121 | 620.3192 | 1858.943 | -0.15 | -0.00009 | 70.20193 |
| P20851     | 0 | 0.9677 | 481.5755 | 1442.712 | 0.72  | 0.00035  | 7.258524 |
| P20851     | 0 | 0.8837 | 531.3225 | 1061.638 | 2.98  | 0.00158  | 25.02668 |
| P20851     | 0 | 1      | 744.0244 | 2230.059 | 1.95  | 0.00145  | 71.98204 |
| P20851     | 0 | 1      | 792.0571 | 2374.157 | 0.18  | 0.00014  | 19.49184 |
| Q14520     | 0 | 1      | 684.6924 | 2052.063 | 2.02  | 0.00138  | 33.1315  |
| Q14520     | 0 | 1      | 684.6928 | 2052.064 | 2.56  | 0.00175  | 8.957685 |
| Q14520     | 0 | 1      | 684.692  | 2052.062 | 1.49  | 0.00102  | 0        |
| Q14520     | 0 | 1      | 576.2972 | 1726.877 | 3.98  | 0.00229  | 5.675166 |
| Q14520     | 0 | 1      | 863.9403 | 1726.873 | 1.69  | 0.00146  | 3.268286 |
| Q14520     | 0 | 1      | 576.2971 | 1726.877 | 3.66  | 0.00211  | 1.388424 |
| Q14520     | 0 | 0.98   | 781.3747 | 1561.742 | 2.55  | 0.00199  | 6.9965   |
| Q14520     | 0 | 1      | 521.2516 | 1561.74  | 1.33  | 0.00069  | 10.59657 |
| Q14520     | 0 | 0.7778 | 634.8325 | 1268.658 | 2.4   | 0.00152  | 13.49475 |
| Q14520     | 0 | 0.8596 | 634.8318 | 1268.656 | 1.24  | 0.00079  | 0        |
| Q14520     | 1 | 1      | 406.9644 | 1624.836 | 2.18  | 0.00089  | 9.939571 |
| Q14520     | 0 | 0.9211 | 629.3574 | 1886.058 | 2.52  | 0.00158  | 16.3625  |
| Q14520     | 0 | 0.9697 | 472.2695 | 1886.056 | 1.77  | 0.00083  | 8.510356 |
| Q14520     | 0 | 0.7273 | 513.7708 | 2052.061 | 1.45  | 0.00074  | 11.7863  |
| Q14520     | 0 | 0.9167 | 555.9868 | 1665.946 | 2.71  | 0.0015   | 18.55164 |
| Q14520     | 0 | 0.2353 | 513.7712 | 2052.063 | 2.28  | 0.00117  | 3.205098 |
| Q14520     | 0 | 0.9231 | 423.5559 | 1268.653 | -1.36 | -0.00058 | 46.4451  |
| Q14520     | 0 | 1      | 576.2955 | 1726.872 | 0.9   | 0.00052  | 45.60072 |
| Q14520     | 0 | 0.4286 | 425.5907 | 1274.758 | 1.43  | 0.00061  | 2.937158 |
| Q14520     | 0 | 0.814  | 581.3066 | 1161.606 | 1.22  | 0.00071  | 43.83019 |
| Q14520     | 0 | 1      | 863.9406 | 1726.874 | 2.04  | 0.00176  | 5.942664 |
| Q14520     | 1 | 1      | 406.9649 | 1624.838 | 3.46  | 0.00141  | 16.73187 |
| Q14520     | 1 | 1      | 542.2825 | 1624.833 | 0.43  | 0.00023  | 32.54614 |
| Q14520     | 0 | 1      | 423.5577 | 1268.658 | 2.89  | 0.00122  | 0        |
| Q14520     | 0 | 0.5455 | 513.7701 | 2052.058 | 0.02  | 0.00001  | 12.21202 |
| P02743     | 2 | 0.9412 | 739.3879 | 2954.53  | 1.57  | 0.00116  | 5.390469 |
| P02743     | 0 | 0.9787 | 517.5961 | 1550.774 | 1.21  | 0.00062  | 42.67443 |
| P02743     | 0 | 0.9041 | 775.8911 | 1550.775 | 1.84  | 0.00143  | 3.376059 |

|        |   |        |          |          |       |          |          |
|--------|---|--------|----------|----------|-------|----------|----------|
| P02743 | 0 | 1      | 517.5963 | 1550.774 | 1.44  | 0.00075  | 6.281616 |
| P02743 | 1 | 0.9143 | 522.9638 | 1566.877 | 2.49  | 0.0013   | 12.12665 |
| P02743 | 0 | 1      | 561.3062 | 1681.904 | 2.48  | 0.00139  | 11.08428 |
| P02743 | 0 | 0.9241 | 841.4553 | 1681.903 | 1.98  | 0.00167  | 5.796036 |
| P02743 | 0 | 0.9444 | 561.3066 | 1681.905 | 3.25  | 0.00182  | 33.52917 |
| P02743 | 0 | 0.96   | 561.3059 | 1681.903 | 1.94  | 0.00109  | 13.65944 |
| P02743 | 0 | 0.8393 | 578.8052 | 1156.603 | 2.92  | 0.00169  | 0        |
| P02743 | 0 | 0.8372 | 715.949  | 1430.891 | 1.14  | 0.00081  | 7.349054 |
| P02743 | 0 | 1      | 517.5966 | 1550.775 | 2.03  | 0.00105  | 59.45896 |
| P02743 | 0 | 0.8333 | 561.3058 | 1681.903 | 1.72  | 0.00096  | 47.29276 |
| P02743 | 0 | 0.9286 | 641.3712 | 1281.735 | 4.5   | 0.00288  | 12.6777  |
| P02743 | 0 | 1      | 788.0008 | 1574.994 | 1.95  | 0.00154  | 27.7945  |
| P02743 | 1 | 0.9697 | 783.9428 | 1566.878 | 3.35  | 0.00263  | 8.331266 |
| P02743 | 0 | 0.8367 | 655.8479 | 1310.689 | 1.84  | 0.00121  | 0        |
| P02743 | 1 | 0.5417 | 594.3405 | 1781.007 | 6.73  | 0.004    | 32.63989 |
| P02743 | 0 | 0.3333 | 485.6024 | 1454.793 | 2.98  | 0.00145  | 10.14863 |
| P02743 | 1 | 1      | 522.9635 | 1566.876 | 1.9   | 0.00099  | 18.26338 |
| P02743 | 0 | 0.8485 | 641.3717 | 1281.736 | 5.36  | 0.00343  | 17.90226 |
| P02743 | 1 | 0.8696 | 522.9653 | 1566.881 | 5.41  | 0.00283  | 32.80954 |
| P27918 | 0 | 1      | 433.474  | 1730.874 | 1.9   | 0.00082  | 36.13181 |
| P27918 | 0 | 1      | 433.4744 | 1730.876 | 2.75  | 0.00119  | 54.19877 |
| P27918 | 0 | 0.9846 | 883.1094 | 2647.314 | 1.42  | 0.00125  | 11.13248 |
| P27918 | 0 | 1      | 775.0263 | 2323.064 | 2.88  | 0.00223  | 0        |
| P27918 | 0 | 1      | 581.521  | 2323.062 | 1.93  | 0.00112  | 16.24206 |
| P27918 | 0 | 0.8718 | 433.4749 | 1730.878 | 4.02  | 0.00174  | 6.189634 |
| P27918 | 0 | 1      | 545.2755 | 1633.812 | 2.18  | 0.00119  | 5.385627 |
| P27918 | 0 | 1      | 603.9831 | 1809.935 | 2.89  | 0.00174  | 4.65006  |
| P27918 | 0 | 1      | 382.2148 | 1525.837 | 2.5   | 0.00095  | 45.63492 |
| P27918 | 0 | 1      | 509.2835 | 1525.836 | 1.65  | 0.00084  | 40.95387 |
| P27918 | 0 | 0.5957 | 615.3825 | 1229.758 | 3.87  | 0.00238  | 11.22651 |
| P27918 | 0 | 1      | 382.2148 | 1525.837 | 2.5   | 0.00095  | 45.63492 |
| P27918 | 0 | 1      | 640.3327 | 1279.658 | 2.1   | 0.00134  | 3.360073 |
| P27918 | 0 | 1      | 591.8191 | 1182.631 | 1.47  | 0.00087  | 2.869444 |
| P27918 | 0 | 1      | 382.2134 | 1525.832 | -1.18 | -0.00045 | 71.17059 |
| P27918 | 0 | 0.7368 | 410.5899 | 1229.755 | 1.85  | 0.00076  | 9.470749 |
| P27918 | 0 | 0.8333 | 394.8819 | 1182.631 | 1.58  | 0.00062  | 16.05436 |
| P02753 | 0 | 1      | 946.413  | 2837.225 | 0.55  | 0.00052  | 3.469536 |
| P02753 | 0 | 1      | 710.0607 | 2837.221 | -0.65 | -0.00046 | 24.56946 |
| P02753 | 0 | 1      | 946.4134 | 2837.226 | 0.94  | 0.00089  | 1.219239 |
| P02753 | 0 | 0.9667 | 483.2467 | 1447.726 | 1.6   | 0.00077  | 35.96778 |
| P02753 | 0 | 1      | 967.4628 | 2900.374 | 1.89  | 0.00183  | 4.658443 |
| P02753 | 1 | 1      | 893.9609 | 3572.822 | 1.82  | 0.00162  | 7.559333 |
| P02753 | 1 | 1      | 715.3693 | 3572.817 | 0.5   | 0.00036  | 11.00039 |
| P02753 | 1 | 1      | 1191.616 | 3572.833 | 5.02  | 0.00597  | 0        |
| P02753 | 0 | 1      | 967.4618 | 2900.371 | 0.82  | 0.00079  | 4.314328 |
| P02753 | 1 | 0.9859 | 715.3678 | 3572.81  | -1.55 | -0.00111 | 11.54692 |
| P02753 | 0 | 1      | 743.9188 | 1486.83  | 0.49  | 0.00036  | 32.72534 |
| P02753 | 0 | 1      | 743.9199 | 1486.832 | 1.88  | 0.0014   | 6.990964 |
| P02753 | 0 | 1      | 485.2683 | 1453.79  | 0.89  | 0.00043  | 60.75327 |
| P02753 | 0 | 0.9444 | 485.2686 | 1453.791 | 1.58  | 0.00077  | 19.33685 |
| P02753 | 0 | 1      | 737.0294 | 2209.074 | 0.96  | 0.00071  | 2.841416 |
| P02753 | 0 | 1      | 1105.041 | 2209.074 | 1     | 0.0011   | 0        |



|        |   |        |          |          |       |          |          |
|--------|---|--------|----------|----------|-------|----------|----------|
| P02753 | 1 | 1      | 893.9612 | 3572.823 | 2.16  | 0.00193  | 2.906531 |
| P02753 | 0 | 1      | 435.2127 | 1303.623 | 1.76  | 0.00077  | 29.57515 |
| P02753 | 0 | 0.9643 | 653.3267 | 1305.646 | 3.25  | 0.00212  | 28.69491 |
| P02753 | 0 | 0.4545 | 483.9196 | 1449.744 | 0.23  | 0.00011  | 10.13191 |
| P02753 | 0 | 0.6667 | 388.2057 | 1162.603 | 1.66  | 0.00064  | 0        |
| P02753 | 1 | 0.7568 | 434.8917 | 1302.661 | 1.71  | 0.00074  | 8.719847 |
| P02753 | 0 | 0.8788 | 483.9203 | 1449.746 | 1.62  | 0.00078  | 12.45729 |
| P02753 | 0 | 1      | 725.3771 | 1449.747 | 2.07  | 0.0015   | 11.12729 |
| P02753 | 0 | 0.8214 | 509.7535 | 1018.5   | 1.18  | 0.0006   | 31.83038 |
| P02753 | 0 | 0.8056 | 581.8051 | 1162.603 | 1.96  | 0.00114  | 3.496979 |
| P02753 | 0 | 0.7872 | 509.7541 | 1018.501 | 2.19  | 0.00112  | 14.96634 |
| P02753 | 0 | 0.9545 | 485.2685 | 1453.791 | 1.33  | 0.00064  | 58.43333 |
| P02753 | 0 | 0.9615 | 496.2818 | 1486.831 | 0.81  | 0.0004   | 39.45337 |
| P02753 | 0 | 0.8788 | 496.282  | 1486.832 | 1.3   | 0.00064  | 9.379045 |
| P02753 | 0 | 0.6154 | 581.8052 | 1162.603 | 2.17  | 0.00126  | 43.0453  |
| P02753 | 0 | 0.75   | 727.4004 | 1453.794 | 3.16  | 0.0023   | 14.88584 |
| P02753 | 1 | 0.6857 | 482.926  | 1446.763 | 2.06  | 0.00099  | 13.81189 |
| P02753 | 0 | 0.4    | 483.9201 | 1449.746 | 1.24  | 0.0006   | 21.14532 |
| P02753 | 0 | 0.6957 | 489.2511 | 1465.739 | -0.09 | -0.00004 | 25.64811 |
| P02753 | 0 | 1      | 972.793  | 2916.365 | 0.4   | 0.00039  | 0        |
| P02753 | 0 | 0.8889 | 435.8867 | 1305.646 | 2.84  | 0.00124  | 8.729925 |
| P02753 | 0 | 1      | 725.3743 | 1449.741 | -1.8  | -0.0013  | 5.332016 |
| P02753 | 0 | 0.4583 | 489.252  | 1465.741 | 1.85  | 0.0009   | 9.247739 |
| P02753 | 1 | 0.9286 | 651.8336 | 1302.66  | 1.18  | 0.00077  | 0        |
| P01019 | 0 | 1      | 721.413  | 1441.819 | 1.14  | 0.00082  | 29.1785  |
| P01019 | 0 | 0.8974 | 863.4635 | 1725.92  | 2.8   | 0.00242  | 17.11893 |
| P01019 | 0 | 0.8571 | 575.978  | 1725.919 | 2.58  | 0.00148  | 9.490314 |
| P01019 | 0 | 1      | 793.465  | 1585.923 | 2.19  | 0.00173  | 6.497079 |
| P01019 | 0 | 0.9348 | 529.3123 | 1585.922 | 1.91  | 0.00101  | 8.895675 |
| P01019 | 0 | 1      | 519.6599 | 1556.965 | 2.32  | 0.0012   | 28.77569 |
| P01019 | 0 | 0.9649 | 519.6596 | 1556.964 | 1.85  | 0.00096  | 13.92412 |
| P01019 | 0 | 1      | 778.9854 | 1556.964 | 1.39  | 0.00108  | 42.24855 |
| P01019 | 0 | 1      | 681.4034 | 2042.196 | 1.81  | 0.00123  | 1.379567 |
| P01019 | 0 | 1      | 1021.602 | 2042.196 | 2.06  | 0.0021   | 1.05458  |
| P01019 | 0 | 0.7857 | 791.4114 | 1581.816 | 1.75  | 0.00139  | 14.4685  |
| P01019 | 0 | 0.9556 | 471.6346 | 1412.889 | 1.65  | 0.00078  | 8.489688 |
| P01019 | 0 | 0.7    | 706.9487 | 1412.89  | 2.42  | 0.00171  | 13.88592 |
| P01019 | 0 | 0.7674 | 452.585  | 1355.74  | 1.5   | 0.00068  | 8.483099 |
| P01019 | 0 | 0.7391 | 678.3744 | 1355.742 | 2.3   | 0.00156  | 8.849647 |
| P01019 | 0 | 0.8214 | 678.3715 | 1355.736 | -2.03 | -0.00137 | 0        |
| P01019 | 0 | 0.7419 | 678.3732 | 1355.739 | 0.59  | 0.0004   | 13.21946 |
| P01019 | 0 | 0.914  | 623.0476 | 1867.128 | 2     | 0.00124  | 4.398575 |
| P01019 | 0 | 1      | 934.0671 | 1867.127 | 1.25  | 0.00117  | 3.467736 |
| P01019 | 0 | 1      | 912.1073 | 4556.507 | 0.74  | 0.00067  | 8.234467 |
| P01019 | 0 | 0.9836 | 821.4415 | 1641.876 | 1.89  | 0.00155  | 17.70982 |
| P01019 | 0 | 0.9487 | 863.4661 | 1725.925 | 5.77  | 0.00498  | 0        |
| P01019 | 0 | 0.76   | 457.9163 | 1371.734 | 0.74  | 0.00034  | 22.36007 |
| P01019 | 0 | 0.7143 | 634.8973 | 1268.787 | 2.13  | 0.00135  | 64.06026 |
| P01019 | 0 | 1      | 519.6589 | 1556.962 | 0.56  | 0.00029  | 56.07894 |
| P01019 | 0 | 0.9524 | 778.9864 | 1556.966 | 2.64  | 0.00206  | 14.87644 |
| P01019 | 0 | 0.7818 | 606.3225 | 1211.638 | 1.07  | 0.00065  | 45.39406 |
| P01019 | 0 | 1      | 721.4128 | 1441.818 | 0.8   | 0.00058  | 26.5273  |

|        |   |        |          |          |       |          |          |
|--------|---|--------|----------|----------|-------|----------|----------|
| P01019 | 0 | 0.7647 | 452.5837 | 1355.736 | -1.47 | -0.00067 | 5.465613 |
| P01019 | 0 | 0.7714 | 529.3096 | 1585.914 | -3.17 | -0.00168 | 18.35841 |
| P01019 | 0 | 0.9423 | 460.2463 | 919.4852 | -0.08 | -0.00004 | 40.67593 |
| P01019 | 0 | 1      | 706.9492 | 1412.891 | 3.02  | 0.00214  | 44.78402 |
| P01019 | 0 | 0.7059 | 532.2979 | 1063.589 | 1.13  | 0.0006   | 22.65428 |
| P01019 | 0 | 0.9    | 529.3121 | 1585.922 | 1.68  | 0.00089  | 14.01908 |
| P01019 | 0 | 0.8372 | 532.2992 | 1063.591 | 3.54  | 0.00188  | 46.90815 |
| P01019 | 0 | 0.7381 | 606.3233 | 1211.639 | 2.48  | 0.0015   | 14.54782 |
| P01019 | 0 | 0.8462 | 532.2993 | 1063.591 | 3.77  | 0.002    | 0        |
| P01019 | 0 | 0.878  | 532.2978 | 1063.588 | 0.9   | 0.00048  | 14.88288 |
| P08185 | 0 | 0.9592 | 384.9164 | 1152.735 | 0.26  | 0.0001   | 8.711287 |
| P08185 | 0 | 0.8788 | 488.4626 | 2438.284 | 0.73  | 0.00036  | 18.96157 |
| P08185 | 0 | 0.9571 | 610.3276 | 2438.288 | 2.7   | 0.00165  | 4.592879 |
| P08185 | 0 | 0.9783 | 488.463  | 2438.286 | 1.67  | 0.00081  | 7.141043 |
| P08185 | 0 | 0.9057 | 813.4345 | 2438.289 | 2.91  | 0.00236  | 3.636947 |
| P08185 | 0 | 1      | 610.3276 | 2438.289 | 2.8   | 0.00171  | 6.779522 |
| P08185 | 0 | 0.975  | 488.4629 | 2438.285 | 1.42  | 0.00069  | 17.37265 |
| P08185 | 0 | 0.8571 | 504.8209 | 1008.634 | 2.2   | 0.00111  | 13.98915 |
| P08185 | 0 | 1      | 854.7338 | 2562.187 | 1.08  | 0.00092  | 2.631478 |
| P08185 | 0 | 1      | 854.7336 | 2562.186 | 0.93  | 0.0008   | 13.80791 |
| P08185 | 0 | 0.8478 | 541.9475 | 1623.828 | 1.89  | 0.00102  | 0        |
| P08185 | 0 | 0.9722 | 812.4172 | 1623.827 | 1.44  | 0.00117  | 4.045117 |
| P08185 | 0 | 0.9706 | 685.0467 | 2053.126 | 2.3   | 0.00157  | 5.629933 |
| P08185 | 0 | 0.975  | 384.9174 | 1152.738 | 2.88  | 0.00111  | 23.33887 |
| P08185 | 0 | 0.8491 | 576.8732 | 1152.739 | 4.25  | 0.00245  | 5.176298 |
| P08185 | 0 | 1      | 854.7339 | 2562.187 | 1.22  | 0.00104  | 0        |
| P08185 | 0 | 0.9677 | 620.9898 | 1860.955 | 4.27  | 0.00265  | 32.90059 |
| P08185 | 0 | 0.9643 | 631.0143 | 1891.028 | 4.29  | 0.00271  | 17.57139 |
| P08185 | 0 | 0.9286 | 631.0132 | 1891.025 | 2.55  | 0.00161  | 40.74413 |
| P08185 | 0 | 0.9    | 610.3524 | 1219.698 | 2.18  | 0.00133  | 20.08575 |
| P08185 | 0 | 0.9167 | 610.3257 | 2438.281 | -0.3  | -0.00018 | 0        |
| P08185 | 0 | 0.7857 | 488.4629 | 2438.285 | 1.42  | 0.00069  | 0        |
| P08185 | 0 | 0.8919 | 620.9896 | 1860.954 | 3.98  | 0.00247  | 60.76868 |
| P08185 | 0 | 1      | 740.3657 | 1479.724 | 0.93  | 0.00069  | 6.876392 |
| P08185 | 0 | 0.6757 | 685.0466 | 2053.125 | 2.21  | 0.00151  | 6.749557 |
| P08185 | 0 | 0.8889 | 576.8722 | 1152.737 | 2.45  | 0.00141  | 24.75664 |
| P08185 | 0 | 0.9286 | 631.012  | 1891.021 | 0.52  | 0.00033  | 18.9997  |
| P08185 | 0 | 0.8421 | 402.2434 | 1204.716 | 1.43  | 0.00057  | 19.74021 |
| P08185 | 0 | 0.7742 | 631.0126 | 1891.023 | 1.48  | 0.00094  | 6.879228 |
| P08185 | 0 | 0.7586 | 384.9166 | 1152.735 | 0.74  | 0.00028  | 31.6497  |
| P08185 | 0 | 1      | 504.8208 | 1008.634 | 2.14  | 0.00108  | 14.25484 |
| P08185 | 0 | 0.7805 | 570.339  | 1139.671 | 3.89  | 0.00222  | 0        |
| P08185 | 0 | 0.7333 | 685.0471 | 2053.127 | 2.92  | 0.002    | 3.563947 |
| P08185 | 0 | 1      | 574.3015 | 2294.184 | 1.81  | 0.00104  | 39.44958 |
| P08185 | 0 | 0.9444 | 610.353  | 1219.699 | 3.08  | 0.00188  | 41.96978 |
| P08185 | 0 | 1      | 631.0126 | 1891.023 | 1.48  | 0.00094  | 19.94828 |
| P08185 | 0 | 0.65   | 541.9465 | 1623.825 | 0.08  | 0.00004  | 6.566654 |
| P08185 | 0 | 0.3043 | 1027.067 | 2053.127 | 3.02  | 0.0031   | 0        |
| P08185 | 0 | 0.4444 | 685.0463 | 2053.124 | 1.76  | 0.00121  | 0        |
| P27169 | 0 | 0.9385 | 736.933  | 1472.859 | 1.65  | 0.00122  | 7.083886 |
| P27169 | 0 | 0.9375 | 491.6243 | 1472.858 | 1.42  | 0.0007   | 7.632973 |
| P27169 | 0 | 0.8654 | 439.2838 | 1315.837 | 2.05  | 0.0009   | 9.680024 |

|        |   |        |          |          |       |          |          |
|--------|---|--------|----------|----------|-------|----------|----------|
| P27169 | 0 | 1      | 643.0247 | 1927.06  | 1.82  | 0.00117  | 15.6372  |
| P27169 | 0 | 0.8947 | 643.0252 | 1927.061 | 2.58  | 0.00166  | 20.84026 |
| P27169 | 0 | 1      | 676.6788 | 2028.022 | 1.22  | 0.00083  | 4.777874 |
| P27169 | 0 | 1      | 1014.516 | 2028.024 | 2.28  | 0.00231  | 0        |
| P27169 | 0 | 1      | 676.6791 | 2028.023 | 1.58  | 0.00107  | 4.514667 |
| P27169 | 0 | 1      | 536.652  | 1607.942 | 1.02  | 0.00055  | 3.577966 |
| P27169 | 0 | 1      | 804.4758 | 1607.944 | 2.7   | 0.00217  | 12.39954 |
| P27169 | 0 | 0.9767 | 536.6518 | 1607.941 | 0.56  | 0.0003   | 8.787539 |
| P27169 | 0 | 1      | 774.5814 | 3868.878 | 1.28  | 0.00099  | 4.807421 |
| P27169 | 0 | 1      | 967.9752 | 3868.879 | 1.49  | 0.00144  | 3.825256 |
| P27169 | 0 | 0.9259 | 491.624  | 1472.857 | 0.73  | 0.00036  | 11.33763 |
| P27169 | 0 | 0.9403 | 736.9329 | 1472.858 | 1.49  | 0.0011   | 3.595785 |
| P27169 | 0 | 1      | 896.827  | 2688.467 | 1.7   | 0.00153  | 6.084014 |
| P27169 | 0 | 1      | 1014.516 | 2028.024 | 2.16  | 0.00219  | 0.425983 |
| P27169 | 0 | 1      | 804.4752 | 1607.943 | 1.94  | 0.00156  | 42.5558  |
| P27169 | 0 | 0.8333 | 556.3351 | 1111.663 | 2.6   | 0.00144  | 14.96833 |
| P27169 | 0 | 1      | 422.2087 | 1264.611 | -2.91 | -0.00123 | 39.48569 |
| P27169 | 0 | 0.9459 | 618.3361 | 1235.665 | 2.1   | 0.0013   | 0        |
| P27169 | 0 | 1      | 391.2498 | 1171.735 | 2.45  | 0.00096  | 43.53766 |
| P27169 | 0 | 0.9375 | 491.6239 | 1472.857 | 0.55  | 0.00027  | 0        |
| P27169 | 0 | 0.6552 | 658.4205 | 1315.834 | -0.16 | -0.00011 | 21.87804 |
| P27169 | 0 | 1      | 439.2833 | 1315.835 | 0.94  | 0.00041  | 33.67272 |
| P27169 | 0 | 0.9333 | 412.5596 | 1235.664 | 1.62  | 0.00067  | 65.45844 |
| P27169 | 0 | 0.6842 | 491.6234 | 1472.856 | -0.45 | -0.00022 | 7.857613 |
| P00740 | 0 | 1      | 804.691  | 2412.058 | 2.86  | 0.0023   | 15.32988 |
| P00740 | 0 | 0.962  | 658.8306 | 1316.654 | 2.63  | 0.00173  | 2.931862 |
| P00740 | 0 | 0.875  | 598.3423 | 1793.012 | 3.49  | 0.00208  | 0        |
| P00740 | 0 | 0.9032 | 598.3424 | 1793.013 | 3.69  | 0.00221  | 0        |
| P00740 | 0 | 0.9846 | 620.3428 | 1859.014 | 2.7   | 0.00167  | 8.645572 |
| P00740 | 0 | 0.96   | 620.3412 | 1859.009 | 0.14  | 0.00009  | 64.45072 |
| P00740 | 0 | 0.9808 | 620.3414 | 1859.01  | 0.43  | 0.00027  | 21.30162 |
| P00740 | 0 | 1      | 613.821  | 2452.262 | 2.67  | 0.00164  | 5.017199 |
| P00740 | 0 | 0.8704 | 562.3326 | 1123.658 | 1.59  | 0.00089  | 2.843107 |
| P00740 | 0 | 1      | 449.0078 | 1793.01  | 1.95  | 0.00087  | 28.52361 |
| P00740 | 0 | 0.8261 | 658.3815 | 1315.756 | 4.3   | 0.00283  | 0        |
| P00740 | 0 | 1      | 551.9461 | 1653.824 | 3.58  | 0.00198  | 31.2692  |
| P00740 | 0 | 0.7778 | 603.8712 | 1206.735 | 1.96  | 0.00118  | 41.89011 |
| P00740 | 0 | 0.9444 | 449.0076 | 1793.009 | 1.47  | 0.00066  | 43.30343 |
| P00740 | 0 | 0.8    | 439.5561 | 1316.654 | 2.46  | 0.00108  | 17.1138  |
| P00740 | 0 | 0.8889 | 561.9593 | 1683.863 | 1.13  | 0.00063  | 2.786082 |
| P00740 | 0 | 0.75   | 531.8189 | 1062.631 | -0.06 | -0.00003 | 20.90695 |
| P00740 | 0 | 0.64   | 439.2573 | 1315.757 | 5.64  | 0.00247  | 36.78167 |
| O14791 | 0 | 1      | 578.9901 | 1734.956 | 4.5   | 0.0026   | 18.51563 |
| O14791 | 0 | 1      | 434.4933 | 1734.951 | 2     | 0.00087  | 14.75358 |
| O14791 | 0 | 0.7333 | 545.3296 | 1089.652 | 1.18  | 0.00064  | 8.734852 |
| O14791 | 0 | 0.8542 | 545.3295 | 1089.652 | 0.95  | 0.00052  | 4.997888 |
| O14791 | 1 | 0.7143 | 489.6195 | 1466.844 | 0.79  | 0.00039  | 27.0965  |
| O14791 | 0 | 0.9388 | 628.6855 | 1884.042 | 2.6   | 0.00163  | 14.59513 |
| O14791 | 0 | 0.6364 | 560.2927 | 1119.578 | 1.74  | 0.00097  | 36.13098 |
| O14791 | 0 | 0.7885 | 617.3512 | 1233.695 | 1.81  | 0.00112  | 6.741108 |
| O14791 | 0 | 0.7778 | 465.2733 | 1393.805 | 0.88  | 0.00041  | 4.342271 |
| O14791 | 1 | 0.4815 | 489.6196 | 1466.844 | 1.11  | 0.00054  | 32.63935 |

|        |   |        |          |          |       |          |          |
|--------|---|--------|----------|----------|-------|----------|----------|
| O14791 | 0 | 0.9615 | 617.3514 | 1233.696 | 2.21  | 0.00136  | 9.32138  |
| O14791 | 0 | 0.7576 | 411.9031 | 1233.695 | 1.38  | 0.00057  | 5.815896 |
| O14791 | 0 | 1      | 537.3018 | 1073.596 | 0.32  | 0.00017  | 7.688614 |
| O14791 | 0 | 0.3143 | 495.7526 | 990.4979 | 0.67  | 0.00033  | 0        |
| O14791 | 0 | 0.6818 | 411.9029 | 1233.694 | 1.01  | 0.00042  | 13.96441 |
| O14791 | 0 | 0.7059 | 617.3513 | 1233.695 | 2.01  | 0.00124  | 0        |
| O14791 | 0 | 0.5    | 398.8872 | 1194.647 | 1.31  | 0.00052  | 42.91328 |
| O14791 | 0 | 1      | 537.3023 | 1073.597 | 1.22  | 0.00066  | 9.14649  |
| O14791 | 0 | 0.75   | 697.4078 | 1393.808 | 3.04  | 0.00212  | 0        |
| P06276 | 0 | 0.7368 | 420.6038 | 1259.797 | 3.33  | 0.0014   | 15.94152 |
| P06276 | 0 | 0.8163 | 630.4023 | 1259.797 | 3.87  | 0.00244  | 6.036501 |
| P06276 | 0 | 0.8367 | 426.2467 | 1276.726 | 0.37  | 0.00016  | 17.46573 |
| P06276 | 0 | 0.9524 | 682.5798 | 2727.298 | 2.04  | 0.00139  | 4.929735 |
| P06276 | 0 | 0.9857 | 649.6761 | 1947.014 | 1.81  | 0.00117  | 8.842005 |
| P06276 | 0 | 0.913  | 505.9535 | 1515.846 | 0.69  | 0.00035  | 0        |
| P06276 | 0 | 0.9057 | 758.4288 | 1515.85  | 3.58  | 0.00271  | 27.49824 |
| P06276 | 0 | 0.8571 | 671.3618 | 1341.716 | 2.37  | 0.00159  | 6.694935 |
| P06276 | 1 | 0.7308 | 511.3359 | 1531.993 | 2.24  | 0.00114  | 14.91957 |
| P06276 | 1 | 0.8929 | 470.9498 | 1410.835 | 2.25  | 0.00106  | 37.8616  |
| P06276 | 0 | 0.973  | 468.9056 | 1404.702 | 1.73  | 0.00081  | 16.42976 |
| P06276 | 0 | 0.9286 | 674.3723 | 1347.737 | 2.52  | 0.0017   | 7.576026 |
| P06276 | 0 | 0.9706 | 686.3773 | 1371.747 | 3.16  | 0.00217  | 45.10973 |
| P02765 | 0 | 1      | 561.0378 | 2241.13  | 4.14  | 0.00232  | 11.08577 |
| P02765 | 0 | 1      | 561.0381 | 2241.131 | 4.57  | 0.00256  | 11.12582 |
| P02765 | 0 | 0.9697 | 561.0364 | 2241.124 | 1.52  | 0.00085  | 5.864598 |
| P02765 | 0 | 1      | 557.038  | 2225.13  | 2.1   | 0.00117  | 4.588538 |
| P02765 | 0 | 1      | 561.0374 | 2241.128 | 3.27  | 0.00183  | 8.537275 |
| P02765 | 0 | 1      | 561.0361 | 2241.122 | 0.98  | 0.00055  | 25.00367 |
| P02765 | 0 | 1      | 557.0371 | 2225.127 | 0.57  | 0.00032  | 28.35814 |
| P02765 | 0 | 1      | 561.037  | 2241.126 | 2.61  | 0.00146  | 0        |
| P02765 | 0 | 1      | 561.0377 | 2241.129 | 3.81  | 0.00214  | 35.15144 |
| P02765 | 0 | 1      | 561.0361 | 2241.122 | 0.98  | 0.00055  | 8.205567 |
| P02765 | 0 | 1      | 1008.541 | 2016.075 | 2.72  | 0.00275  | 0        |
| P02765 | 0 | 1      | 672.6959 | 2016.073 | 1.75  | 0.00118  | 1.172322 |
| P02765 | 0 | 1      | 1008.541 | 2016.074 | 2.18  | 0.0022   | 0        |
| P02765 | 0 | 1      | 525.0108 | 2097.021 | 1.52  | 0.0008   | 0        |
| P02765 | 0 | 1      | 561.037  | 2241.126 | 2.61  | 0.00146  | 15.84392 |
| P02765 | 0 | 1      | 561.0372 | 2241.127 | 2.94  | 0.00165  | 20.07414 |
| P02765 | 0 | 1      | 561.0347 | 2241.117 | -1.53 | -0.00085 | 25.51995 |
| P02765 | 0 | 1      | 561.0372 | 2241.127 | 2.94  | 0.00165  | 21.34471 |
| P02765 | 0 | 1      | 747.7125 | 2241.123 | 1.15  | 0.00086  | 0        |
| P02765 | 0 | 1      | 720.7301 | 2160.176 | 1.94  | 0.0014   | 4.863881 |
| P02765 | 0 | 1      | 557.038  | 2225.13  | 2.1   | 0.00117  | 7.35143  |
| P02765 | 0 | 1      | 557.038  | 2225.13  | 2.21  | 0.00123  | 6.513257 |
| P02765 | 0 | 1      | 557.0372 | 2225.127 | 0.79  | 0.00044  | 2.519679 |
| P02765 | 0 | 1      | 742.381  | 2225.128 | 1.37  | 0.00101  | 2.457513 |
| P02765 | 0 | 0.987  | 694.3471 | 2081.027 | 1.67  | 0.00116  | 1.334982 |
| P02765 | 0 | 1      | 561.0376 | 2241.129 | 3.7   | 0.00207  | 27.17808 |
| P02765 | 0 | 1      | 561.0365 | 2241.124 | 1.74  | 0.00098  | 14.63333 |
| P02765 | 0 | 1      | 557.038  | 2225.13  | 2.1   | 0.00117  | 2.167    |
| P02765 | 0 | 1      | 445.8317 | 2225.129 | 1.74  | 0.00077  | 32.19185 |
| P02765 | 0 | 1      | 742.3806 | 2225.127 | 0.79  | 0.00059  | 2.380493 |

|        |   |        |          |          |      |         |          |
|--------|---|--------|----------|----------|------|---------|----------|
| P02765 | 0 | 1      | 557.0377 | 2225.129 | 1.66 | 0.00093 | 0.171154 |
| P02765 | 0 | 1      | 694.347  | 2081.026 | 1.5  | 0.00104 | 0        |
| P02765 | 0 | 1      | 557.0382 | 2225.131 | 2.54 | 0.00141 | 4.674048 |
| P02765 | 0 | 1      | 747.7116 | 2241.12  | 0.01 | 0       | 10.25762 |
| P02765 | 0 | 1      | 561.036  | 2241.122 | 0.76 | 0.00043 | 5.47052  |
| P02765 | 0 | 1      | 561.0367 | 2241.125 | 2.18 | 0.00122 | 16.90218 |
| P02765 | 0 | 1      | 694.3477 | 2081.028 | 2.47 | 0.00171 | 3.961037 |
| P02765 | 0 | 1      | 521.0125 | 2081.028 | 2.25 | 0.00117 | 13.20379 |
| P02765 | 0 | 1      | 521.0126 | 2081.028 | 2.49 | 0.00129 | 0        |
| P02765 | 0 | 0.9556 | 694.3468 | 2081.026 | 1.23 | 0.00086 | 1.896299 |
| P02765 | 0 | 1      | 1217.924 | 3651.757 | 1.48 | 0.0018  | 3.22273  |
| P02765 | 0 | 1      | 913.6953 | 3651.759 | 2.09 | 0.00191 | 0        |
| P02765 | 0 | 1      | 540.7992 | 2160.175 | 1.56 | 0.00084 | 18.25223 |
| P02765 | 0 | 1      | 1080.591 | 2160.175 | 1.52 | 0.00164 | 0        |
| P02765 | 0 | 1      | 720.7288 | 2160.172 | 0.16 | 0.00011 | 2.420577 |
| P02765 | 0 | 1      | 540.7985 | 2160.172 | 0.32 | 0.00017 | 41.36589 |
| P02765 | 0 | 1      | 1274.646 | 3821.923 | 1.42 | 0.00181 | 0        |
| P02765 | 0 | 0.96   | 765.1904 | 3821.923 | 1.41 | 0.00108 | 13.95909 |
| P02765 | 0 | 1      | 720.7296 | 2160.174 | 1.17 | 0.00085 | 2.537074 |
| P02765 | 0 | 1      | 672.6951 | 2016.071 | 0.57 | 0.00038 | 5.42997  |
| P02765 | 0 | 1      | 956.2363 | 3821.923 | 1.46 | 0.0014  | 0        |
| P02765 | 0 | 0.9722 | 956.5098 | 2867.515 | 1.62 | 0.00154 | 11.48514 |
| P02765 | 0 | 0.75   | 495.6186 | 1484.841 | 6.81 | 0.00337 | 33.31622 |
| P02765 | 0 | 0.7857 | 551.332  | 1101.657 | 1.95 | 0.00107 | 26.79151 |
| P02765 | 0 | 1      | 908.4778 | 2723.419 | 3.95 | 0.00358 | 3.633132 |
| P02765 | 0 | 1      | 717.6342 | 2867.515 | 1.65 | 0.00119 | 4.069098 |
| P02765 | 0 | 1      | 1434.26  | 2867.513 | 0.94 | 0.00135 | 0        |
| P02765 | 0 | 0.9808 | 487.9977 | 1948.969 | 0.56 | 0.00027 | 8.130723 |
| P02765 | 0 | 1      | 974.9896 | 1948.972 | 2.14 | 0.00209 | 6.990175 |
| P02765 | 0 | 1      | 650.3278 | 1948.969 | 0.54 | 0.00035 | 8.384644 |
| P02765 | 0 | 0.9844 | 602.295  | 1804.87  | 2.65 | 0.0016  | 4.882636 |
| P02765 | 0 | 0.9792 | 487.9979 | 1948.97  | 1.06 | 0.00052 | 8.446928 |
| P02765 | 0 | 1      | 974.9897 | 1948.972 | 2.27 | 0.00221 | 5.025165 |
| P02765 | 0 | 1      | 650.3283 | 1948.97  | 1.29 | 0.00084 | 7.577567 |
| P02765 | 0 | 1      | 974.9899 | 1948.972 | 2.46 | 0.00239 | 9.155133 |
| P02765 | 0 | 0.9815 | 650.3287 | 1948.972 | 2.04 | 0.00133 | 27.28166 |
| P02765 | 0 | 0.9818 | 650.3284 | 1948.971 | 1.48 | 0.00096 | 10.36937 |
| P02765 | 0 | 0.9344 | 650.3289 | 1948.972 | 2.23 | 0.00145 | 13.05327 |
| P02765 | 0 | 1      | 650.3289 | 1948.972 | 2.23 | 0.00145 | 8.41076  |
| P02765 | 0 | 0.975  | 487.998  | 1948.97  | 1.25 | 0.00061 | 7.311262 |
| P02765 | 0 | 1      | 650.3277 | 1948.969 | 0.44 | 0.00029 | 8.011565 |
| P02765 | 0 | 0.9672 | 602.2952 | 1804.871 | 2.96 | 0.00178 | 2.952495 |
| P02765 | 0 | 0.8182 | 650.3286 | 1948.971 | 1.85 | 0.0012  | 6.408669 |
| P02765 | 0 | 1      | 717.6335 | 2867.512 | 0.72 | 0.00051 | 1.95078  |
| P02765 | 0 | 0.6486 | 495.616  | 1484.833 | 1.57 | 0.00078 | 17.82394 |
| P02765 | 0 | 0.5625 | 495.6153 | 1484.831 | 0.15 | 0.00008 | 7.78282  |
| P02765 | 0 | 0.8548 | 742.9205 | 1484.834 | 1.81 | 0.00134 | 5.984344 |
| P02765 | 0 | 0.7792 | 742.9204 | 1484.833 | 1.56 | 0.00116 | 5.222761 |
| P02765 | 0 | 0.7812 | 495.6153 | 1484.831 | 0.22 | 0.00011 | 8.701668 |
| P02765 | 0 | 0.7826 | 670.8693 | 1340.731 | 1.65 | 0.0011  | 0        |
| P02765 | 0 | 0.9592 | 650.329  | 1948.972 | 2.42 | 0.00157 | 16.47215 |
| P02765 | 0 | 1      | 669.2681 | 1337.529 | 1.09 | 0.00073 | 0        |

|        |   |        |          |          |       |          |          |
|--------|---|--------|----------|----------|-------|----------|----------|
| P02765 | 0 | 1      | 650.3291 | 1948.973 | 2.61  | 0.00169  | 59.94659 |
| P02765 | 0 | 0.9851 | 956.512  | 2867.521 | 3.85  | 0.00368  | 5.655369 |
| P02765 | 0 | 0.7368 | 495.6168 | 1484.836 | 3.18  | 0.00157  | 28.15335 |
| P02765 | 0 | 1      | 741.3184 | 1481.63  | 0.07  | 0.00005  | 0        |
| P02765 | 0 | 1      | 561.0365 | 2241.124 | 1.74  | 0.00098  | 0        |
| P02765 | 0 | 0.6    | 504.2837 | 1007.56  | -1.08 | -0.00055 | 0        |
| P02765 | 0 | 1      | 672.6959 | 2016.073 | 1.75  | 0.00118  | 0        |
| P02765 | 0 | 0.5208 | 504.2846 | 1007.562 | 0.8   | 0.0004   | 2.900759 |
| P02765 | 0 | 0.9583 | 495.6166 | 1484.835 | 2.74  | 0.00136  | 36.50672 |
| P02765 | 0 | 0.7143 | 495.6161 | 1484.834 | 1.82  | 0.0009   | 39.74815 |
| P02765 | 0 | 0.8621 | 650.3298 | 1948.975 | 3.73  | 0.00243  | 0        |
| P02765 | 0 | 0.8958 | 670.8692 | 1340.731 | 1.56  | 0.00104  | 31.0262  |
| P02765 | 0 | 0.9375 | 487.9979 | 1948.97  | 1.13  | 0.00055  | 50.32969 |
| P02765 | 0 | 0.8036 | 551.3305 | 1101.654 | -0.82 | -0.00045 | 0        |
| P02765 | 0 | 1      | 742.381  | 2225.129 | 1.45  | 0.00108  | 2.163415 |
| P02765 | 0 | 0.9444 | 495.6177 | 1484.838 | 4.96  | 0.00246  | 44.55171 |
| P02765 | 0 | 0.8857 | 447.5821 | 1340.732 | 2.07  | 0.00093  | 27.93489 |
| P02765 | 0 | 0.5818 | 504.284  | 1007.561 | -0.42 | -0.00021 | 3.437401 |
| P02765 | 0 | 0.8036 | 551.3323 | 1101.657 | 2.5   | 0.00138  | 14.67101 |
| P02765 | 0 | 0.5294 | 504.2843 | 1007.561 | 0.25  | 0.00013  | 4.740056 |
| P02765 | 0 | 1      | 699.6809 | 2097.028 | 4.67  | 0.00326  | 0        |
| P02765 | 0 | 1      | 561.0375 | 2241.128 | 3.49  | 0.00195  | 50.71252 |
| P02765 | 0 | 0.9474 | 495.6158 | 1484.833 | 1.14  | 0.00056  | 78.73918 |
| P02765 | 0 | 0.9655 | 747.7134 | 2241.126 | 2.37  | 0.00177  | 0        |
| P02765 | 0 | 0.7193 | 551.3325 | 1101.658 | 2.83  | 0.00156  | 6.232641 |
| P02765 | 0 | 0.7857 | 551.332  | 1101.657 | 1.83  | 0.00101  | 5.760327 |
| P02765 | 0 | 0.6364 | 495.6164 | 1484.835 | 2.31  | 0.00114  | 30.36004 |
| P02765 | 0 | 1      | 669.2687 | 1337.53  | 2     | 0.00134  | 8.910394 |
| P02765 | 0 | 0.5818 | 504.2835 | 1007.56  | -1.39 | -0.0007  | 5.081807 |
| P02765 | 0 | 1      | 720.7317 | 2160.181 | 4.14  | 0.00298  | 45.71784 |
| P02765 | 0 | 0.7391 | 650.3295 | 1948.974 | 3.17  | 0.00206  | 24.6255  |
| P02765 | 0 | 0.9667 | 479.2814 | 957.5555 | 3.02  | 0.00144  | 0        |
| P02765 | 0 | 0.7857 | 551.3319 | 1101.657 | 1.72  | 0.00095  | 5.530228 |
| P02765 | 0 | 1      | 561.0387 | 2241.133 | 5.66  | 0.00317  | 0        |
| P02765 | 0 | 0.7222 | 504.2842 | 1007.561 | -0.05 | -0.00003 | 0        |
| P02765 | 0 | 0.6905 | 504.2842 | 1007.561 | -0.11 | -0.00006 | 26.011   |
| P02765 | 0 | 0.8605 | 551.3314 | 1101.655 | 0.73  | 0.0004   | 0        |
| P02765 | 0 | 0.8    | 747.714  | 2241.127 | 3.19  | 0.00238  | 4.787404 |
| P02765 | 0 | 0.8824 | 495.6167 | 1484.836 | 3.05  | 0.00151  | 78.09561 |
| P02765 | 0 | 1      | 557.0371 | 2225.126 | 0.46  | 0.00025  | 21.53825 |
| P02765 | 0 | 0.9615 | 561.0381 | 2241.131 | 4.57  | 0.00256  | 3.687115 |
| P02765 | 0 | 0.7895 | 551.3314 | 1101.656 | 0.84  | 0.00046  | 15.15243 |
| P02765 | 0 | 0.6129 | 504.2857 | 1007.564 | 2.98  | 0.0015   | 28.41929 |
| P02765 | 0 | 0.7568 | 568.3248 | 1135.642 | 3.45  | 0.00196  | 0        |
| P02765 | 0 | 0.9667 | 479.2808 | 957.5544 | 1.87  | 0.00089  | 8.087171 |
| P02765 | 0 | 1      | 672.6964 | 2016.075 | 2.48  | 0.00166  | 1.396828 |
| P02765 | 0 | 1      | 447.5819 | 1340.731 | 1.66  | 0.00074  | 36.11278 |
| P02765 | 0 | 0.9667 | 479.2811 | 957.5549 | 2.38  | 0.00114  | 3.612337 |
| P02765 | 0 | 0.8235 | 650.3292 | 1948.973 | 2.79  | 0.00181  | 0        |
| P02765 | 0 | 1      | 557.0377 | 2225.129 | 1.55  | 0.00086  | 32.82062 |
| P02765 | 0 | 1      | 447.5822 | 1340.732 | 2.27  | 0.00102  | 35.98244 |
| P02765 | 0 | 0.7895 | 551.3306 | 1101.654 | -0.71 | -0.00039 | 13.36723 |

|            |   |        |          |          |       |          |          |
|------------|---|--------|----------|----------|-------|----------|----------|
| P02765     | 0 | 0.4286 | 487.9981 | 1948.97  | 1.38  | 0.00067  | 9.404763 |
| P02765     | 0 | 1      | 742.3807 | 2225.127 | 0.96  | 0.00071  | 2.700198 |
| P02765     | 0 | 1      | 1080.591 | 2160.175 | 1.63  | 0.00176  | 0        |
| P02765     | 0 | 0.72   | 487.9981 | 1948.97  | 1.44  | 0.0007   | 10.21205 |
| P02765     | 0 | 0.7895 | 551.3311 | 1101.655 | 0.17  | 0.0001   | 5.30816  |
| P02765     | 0 | 1      | 447.5818 | 1340.731 | 1.32  | 0.00059  | 0        |
| P02765     | 0 | 0.6667 | 602.2971 | 1804.877 | 6.1   | 0.00367  | 16.13634 |
| P02765     | 0 | 0.8158 | 551.3318 | 1101.656 | 1.5   | 0.00083  | 26.7378  |
| P02765     | 0 | 0.7    | 650.3291 | 1948.973 | 2.61  | 0.00169  | 30.76006 |
| P02765     | 0 | 1      | 557.0379 | 2225.13  | 1.99  | 0.00111  | 28.35987 |
| P02765     | 0 | 1      | 561.036  | 2241.122 | 0.76  | 0.00043  | 30.63366 |
| P02765     | 0 | 1      | 717.6348 | 2867.517 | 2.51  | 0.0018   | 13.62547 |
| P02765     | 0 | 0.6316 | 902.9365 | 1804.866 | 0.09  | 0.00008  | 4.724318 |
| P02765     | 0 | 0.9333 | 741.3187 | 1481.63  | 0.48  | 0.00036  | 0        |
| P02765     | 0 | 0.9756 | 479.2806 | 957.5539 | 1.42  | 0.00068  | 36.3133  |
| P00738     | 0 | 0.9692 | 623.3119 | 1867.921 | 2.6   | 0.00162  | 5.841087 |
| P00738     | 0 | 0.9231 | 623.3125 | 1867.923 | 3.58  | 0.00223  | 18.76155 |
| P00739; P0 | 0 | 1      | 545.2894 | 1633.854 | 2.41  | 0.00131  | 8.85826  |
| P00739; P0 | 0 | 0.6667 | 404.5835 | 1211.736 | 0.76  | 0.00031  | 23.85787 |
| P00739; P0 | 0 | 0.8594 | 606.3724 | 1211.737 | 2.03  | 0.00123  | 6.361173 |
| P00739; P0 | 0 | 0.575  | 404.583  | 1211.734 | -0.6  | -0.00024 | 14.35788 |
| P00738     | 1 | 1      | 442.5029 | 1766.99  | -0.96 | -0.00043 | 4.16309  |
| P00738     | 0 | 0.9216 | 497.9524 | 1491.843 | 1.19  | 0.00059  | 15.19254 |
| P00739; P0 | 0 | 0.6452 | 404.5835 | 1211.736 | 0.68  | 0.00028  | 27.89671 |
| P00738     | 0 | 0.8571 | 695.0775 | 2083.218 | 1.26  | 0.00087  | 7.109708 |
| P00738     | 0 | 1      | 615.8231 | 2460.271 | 3.62  | 0.00223  | 4.733875 |
| P00738     | 0 | 1      | 820.7597 | 2460.265 | 1.14  | 0.00094  | 4.056282 |
| P00739; P0 | 0 | 1      | 789.972  | 1578.937 | 1.39  | 0.00109  | 5.505499 |
| P00739; P0 | 0 | 1      | 526.9839 | 1578.937 | 1.65  | 0.00087  | 9.713168 |
| P00738     | 0 | 1      | 615.8215 | 2460.264 | 1.04  | 0.00064  | 9.948783 |
| P00738     | 0 | 1      | 772.7266 | 2316.165 | 2.43  | 0.00188  | 1.804138 |
| P00738     | 0 | 0.7778 | 497.9528 | 1491.844 | 1.87  | 0.00093  | 11.74532 |
| P00738     | 0 | 0.8778 | 746.4249 | 1491.843 | 1.1   | 0.00082  | 6.579601 |
| P00738     | 0 | 0.7708 | 497.9518 | 1491.841 | -0.04 | -0.00002 | 8.481789 |
| P00738     | 0 | 0.8889 | 746.4244 | 1491.842 | 0.44  | 0.00033  | 5.805256 |
| P00738     | 0 | 0.9778 | 623.3116 | 1867.92  | 2.11  | 0.00131  | 68.85376 |
| P00738     | 0 | 1      | 934.4636 | 1867.92  | 1.98  | 0.00185  | 0        |
| P00738     | 0 | 1      | 623.3114 | 1867.92  | 1.81  | 0.00113  | 20.64974 |
| P00738     | 0 | 0.8409 | 497.9523 | 1491.842 | 1.01  | 0.0005   | 4.707512 |
| P00738     | 0 | 0.717  | 617.98   | 1851.926 | 2.28  | 0.00141  | 0        |
| P00738     | 0 | 0.9762 | 617.9805 | 1851.927 | 3.07  | 0.0019   | 13.38197 |
| P00738     | 0 | 0.9663 | 617.9797 | 1851.925 | 1.78  | 0.0011   | 5.030733 |
| P00738     | 0 | 1      | 617.9806 | 1851.927 | 3.17  | 0.00196  | 51.99686 |
| P00739; P0 | 0 | 0.9362 | 717.9207 | 1434.834 | 1.11  | 0.00079  | 9.209297 |
| P00739; P0 | 0 | 1      | 789.9721 | 1578.937 | 1.54  | 0.00122  | 7.52731  |
| P00739; P0 | 0 | 0.9608 | 526.9834 | 1578.936 | 0.72  | 0.00038  | 6.662654 |
| P00738     | 1 | 1      | 427.4916 | 1706.944 | 0.44  | 0.00019  | 37.65122 |
| P00738     | 0 | 0.6889 | 717.8783 | 1434.749 | 1.82  | 0.00131  | 5.371442 |
| P00738     | 0 | 0.6818 | 717.878  | 1434.749 | 1.39  | 0.001    | 5.882028 |
| P00738     | 0 | 0.64   | 478.9212 | 1434.749 | 1.7   | 0.00081  | 19.30486 |
| P00738     | 0 | 0.7561 | 478.9214 | 1434.75  | 1.96  | 0.00094  | 9.009421 |
| P00739; P0 | 0 | 1      | 533.9432 | 1599.815 | 2.84  | 0.00152  | 13.07789 |

|            |   |        |          |          |       |          |          |
|------------|---|--------|----------|----------|-------|----------|----------|
| P00739; P0 | 0 | 0.9863 | 800.4113 | 1599.815 | 3.08  | 0.00246  | 8.227809 |
| P00738     | 0 | 0.9851 | 576.6287 | 1727.872 | 1.51  | 0.00087  | 10.05374 |
| P00738     | 0 | 1      | 864.4396 | 1727.872 | 1.73  | 0.0015   | 5.701071 |
| P00739; P0 | 0 | 0.8714 | 800.411  | 1599.815 | 2.62  | 0.0021   | 0        |
| P00738     | 0 | 1      | 864.439  | 1727.871 | 1.02  | 0.00089  | 6.966609 |
| P00738     | 0 | 0.9821 | 792.3877 | 1583.768 | 0.74  | 0.00059  | 0        |
| P00738     | 0 | 0.9792 | 576.6295 | 1727.874 | 2.78  | 0.0016   | 8.598439 |
| P00738     | 0 | 1      | 864.4403 | 1727.873 | 2.44  | 0.00211  | 21.27652 |
| P00738     | 0 | 0.9833 | 576.6281 | 1727.87  | 0.45  | 0.00026  | 9.288018 |
| P00738     | 0 | 1      | 576.6289 | 1727.872 | 1.72  | 0.00099  | 44.44397 |
| P00739; P0 | 0 | 0.9821 | 545.2885 | 1633.851 | 0.73  | 0.0004   | 9.662613 |
| P00739; P0 | 0 | 0.9565 | 545.2874 | 1633.848 | -1.4  | -0.00076 | 17.14644 |
| P00739; P0 | 0 | 1      | 817.4298 | 1633.852 | 1.49  | 0.00122  | 5.912034 |
| P00739; P0 | 0 | 1      | 545.2888 | 1633.852 | 1.18  | 0.00064  | 10.99026 |
| P00739; P0 | 0 | 1      | 817.4294 | 1633.851 | 1.04  | 0.00085  | 9.215112 |
| P00738     | 0 | 1      | 650.9179 | 3250.56  | 3.23  | 0.0021   | 3.063589 |
| P00738     | 0 | 1      | 650.9176 | 3250.559 | 2.76  | 0.00179  | 6.028208 |
| P00739; P0 | 0 | 0.9792 | 545.2889 | 1633.852 | 1.4   | 0.00077  | 40.41518 |
| P00739; P0 | 0 | 1      | 545.2897 | 1633.855 | 2.97  | 0.00162  | 61.47524 |
| P00739; P0 | 0 | 0.9211 | 545.2891 | 1633.853 | 1.74  | 0.00095  | 9.576406 |
| P00738     | 0 | 1      | 650.9177 | 3250.56  | 2.95  | 0.00191  | 21.74493 |
| P00739; P0 | 0 | 0.9615 | 545.2885 | 1633.851 | 0.73  | 0.0004   | 10.92377 |
| P00739; P0 | 0 | 1      | 545.2891 | 1633.853 | 1.85  | 0.00101  | 7.647542 |
| P00739; P0 | 0 | 0.9643 | 545.2882 | 1633.85  | 0.17  | 0.00009  | 7.670223 |
| P00739; P0 | 0 | 0.9833 | 666.8856 | 1332.764 | 1.26  | 0.00084  | 6.644083 |
| P00739; P0 | 0 | 1      | 607.3321 | 1819.982 | 2.58  | 0.00157  | 12.64681 |
| P00739; P0 | 0 | 1      | 455.7507 | 1819.981 | 2.24  | 0.00102  | 11.57495 |
| P00739; P0 | 1 | 0.4146 | 473.6367 | 1418.895 | 0.82  | 0.00039  | 28.42399 |
| P00739; P0 | 1 | 0.9302 | 617.7175 | 1851.138 | 3.51  | 0.00217  | 19.44054 |
| P00738     | 0 | 0.6579 | 497.9521 | 1491.842 | 0.58  | 0.00029  | 6.212155 |
| P00738     | 0 | 0.6875 | 478.9204 | 1434.746 | -0.15 | -0.00007 | 9.035597 |
| P00738     | 0 | 0.9167 | 562.8036 | 1124.6   | 2.67  | 0.0015   | 4.282324 |
| P00738     | 0 | 0.6364 | 478.9206 | 1434.747 | 0.36  | 0.00017  | 0        |
| P00739; P0 | 0 | 0.8254 | 594.8354 | 1188.664 | 2.86  | 0.0017   | 10.16927 |
| P00738     | 0 | 0.6087 | 478.921  | 1434.749 | 1.26  | 0.0006   | 16.79485 |
| P00738     | 0 | 0.6087 | 478.9213 | 1434.749 | 1.9   | 0.00091  | 7.888613 |
| P00739; P0 | 0 | 0.9744 | 817.4287 | 1633.85  | 0.14  | 0.00012  | 0        |
| P00739; P0 | 0 | 0.9189 | 526.9843 | 1578.938 | 2.46  | 0.00129  | 10.61268 |
| P00739; P0 | 0 | 1      | 604.8381 | 1208.669 | 1.98  | 0.00119  | 0        |
| P00738     | 0 | 0.8077 | 478.9202 | 1434.746 | -0.4  | -0.00019 | 15.9898  |
| P00739; P0 | 0 | 1      | 604.837  | 1208.667 | 0.06  | 0.00003  | 5.94458  |
| P00739; P0 | 0 | 1      | 604.8383 | 1208.669 | 2.18  | 0.00132  | 6.355654 |
| P00739; P0 | 0 | 0.8333 | 545.2889 | 1633.852 | 1.52  | 0.00083  | 7.819473 |
| P00738     | 0 | 1      | 926.4666 | 1851.926 | 2.48  | 0.0023   | 43.9442  |
| P00738     | 1 | 1      | 427.4915 | 1706.944 | 0.22  | 0.0001   | 79.15483 |
| P00738     | 0 | 0.913  | 478.9209 | 1434.748 | 1.07  | 0.00051  | 11.34952 |
| P00738     | 0 | 0.85   | 478.9213 | 1434.749 | 1.83  | 0.00088  | 34.76339 |
| P00739; P0 | 0 | 0.5556 | 444.9262 | 1332.764 | 1.3   | 0.00058  | 16.70804 |
| P00738     | 0 | 0.7458 | 674.3785 | 1347.75  | 8.11  | 0.00546  | 12.56084 |
| P00738     | 0 | 0.8125 | 478.9204 | 1434.747 | -0.08 | -0.00004 | 62.02139 |
| P00739; P0 | 0 | 0.8387 | 594.8349 | 1188.663 | 2.04  | 0.00121  | 15.26654 |
| P00739; P0 | 0 | 0.3125 | 404.5837 | 1211.736 | 1.13  | 0.00046  | 38.3526  |



|            |   |        |          |          |       |          |          |
|------------|---|--------|----------|----------|-------|----------|----------|
| P00738     | 0 | 0.6207 | 478.921  | 1434.749 | 1.26  | 0.0006   | 7.610994 |
| P00739; P0 | 0 | 0.8621 | 526.9837 | 1578.937 | 1.3   | 0.00068  | 30.90254 |
| P00739; P0 | 0 | 0.7692 | 444.9258 | 1332.763 | 0.61  | 0.00027  | 20.90685 |
| P00739; P0 | 0 | 0.8889 | 450.258  | 1348.759 | 1.68  | 0.00076  | 28.44966 |
| P00738     | 0 | 0.9655 | 576.6296 | 1727.874 | 3.1   | 0.00179  | 0        |
| P00739; P0 | 0 | 0.7059 | 404.5837 | 1211.737 | 1.29  | 0.00052  | 32.86251 |
| P00739; P0 | 0 | 0.5957 | 501.8018 | 1002.596 | 1.12  | 0.00056  | 26.13306 |
| P00739; P0 | 0 | 0.381  | 404.5838 | 1211.737 | 1.44  | 0.00058  | 34.80645 |
| P00738     | 0 | 0.9375 | 674.3762 | 1347.745 | 4.58  | 0.00308  | 20.71214 |
| P00739; P0 | 0 | 0.7037 | 404.5843 | 1211.738 | 2.8   | 0.00113  | 25.39663 |
| P00738     | 0 | 1      | 562.8035 | 1124.6   | 2.56  | 0.00144  | 41.50185 |
| P00738     | 2 | 1      | 409.0085 | 1633.012 | 0.16  | 0.00007  | 27.51033 |
| P00739; P0 | 0 | 1      | 728.3563 | 1455.705 | -2.06 | -0.0015  | 0        |
| P00739; P0 | 0 | 0.3784 | 573.8538 | 1146.7   | 2.73  | 0.00156  | 48.05908 |
| P00739; P0 | 0 | 0.7347 | 534.3206 | 1067.634 | 0.94  | 0.0005   | 0        |
| P00738     | 0 | 1      | 934.4642 | 1867.921 | 2.64  | 0.00246  | 3.733863 |
| P00738     | 0 | 0.72   | 617.9805 | 1851.927 | 2.97  | 0.00183  | 15.12336 |
| P00738     | 0 | 0.3478 | 478.9211 | 1434.749 | 1.45  | 0.00069  | 9.637491 |
| P00738     | 0 | 1      | 854.413  | 1707.819 | -0.3  | -0.00026 | 6.346492 |
| P00738     | 1 | 1      | 427.4917 | 1706.945 | 0.8   | 0.00034  | 13.9704  |
| P00739; P0 | 0 | 0.9231 | 403.5613 | 1208.669 | 2.14  | 0.00086  | 9.922118 |
| P00739; P0 | 0 | 0.5833 | 396.8925 | 1188.663 | 2.36  | 0.00094  | 0        |
| P00739; P0 | 0 | 0.7333 | 604.8378 | 1208.668 | 1.47  | 0.00089  | 16.93134 |
| P00738     | 0 | 0.52   | 497.9518 | 1491.841 | -0.1  | -0.00005 | 17.20039 |
| P00738     | 0 | 1      | 926.4667 | 1851.926 | 2.55  | 0.00236  | 21.70416 |
| P00739; P0 | 0 | 0.7812 | 604.8389 | 1208.67  | 3.19  | 0.00193  | 6.641055 |
| P00738     | 0 | 1      | 562.8035 | 1124.6   | 2.56  | 0.00144  | 22.53116 |
| P00738     | 0 | 1      | 562.8019 | 1124.597 | -0.27 | -0.00015 | 3.374265 |
| P00738     | 0 | 0.9231 | 478.9208 | 1434.748 | 0.87  | 0.00042  | 3.263679 |
| P00738     | 0 | 1      | 854.4148 | 1707.822 | 1.77  | 0.00151  | 8.850186 |
| P00738     | 0 | 1      | 490.7521 | 980.4969 | 2.14  | 0.00105  | 4.756501 |
| P00739; P0 | 0 | 0.8    | 604.8384 | 1208.67  | 2.48  | 0.0015   | 9.656388 |
| P00738     | 0 | 0.9677 | 562.8037 | 1124.6   | 2.77  | 0.00156  | 27.45691 |
| P00739; P0 | 0 | 0.55   | 533.9431 | 1599.815 | 2.61  | 0.00139  | 29.20991 |
| P00738     | 0 | 1      | 375.5381 | 1124.6   | 2.49  | 0.00093  | 0        |
| P00738     | 0 | 0.3889 | 478.9212 | 1434.749 | 1.58  | 0.00075  | 15.42829 |
| P00739; P0 | 0 | 0.5333 | 450.2581 | 1348.76  | 1.95  | 0.00088  | 42.17896 |
| P00738     | 0 | 1      | 617.9791 | 1851.923 | 0.8   | 0.00049  | 28.43826 |
| P00738     | 0 | 1      | 926.4666 | 1851.926 | 2.42  | 0.00224  | 37.28574 |
| P00738     | 0 | 1      | 576.6289 | 1727.872 | 1.83  | 0.00105  | 14.48663 |
| P00738     | 0 | 0.5556 | 521.5609 | 2083.222 | 2.98  | 0.00155  | 19.52695 |
| P00738     | 0 | 0.7273 | 695.0773 | 2083.217 | 0.91  | 0.00063  | 25.58336 |
| P00738     | 0 | 0.1579 | 449.9185 | 1347.741 | 1.51  | 0.00068  | 26.11288 |
| P00738     | 0 | 1      | 569.9457 | 1707.822 | 1.87  | 0.00107  | 44.09102 |
| P00738     | 1 | 1      | 427.4916 | 1706.945 | 0.58  | 0.00025  | 8.750884 |
| P00738     | 0 | 0.4167 | 695.0778 | 2083.219 | 1.61  | 0.00112  | 4.576386 |
| P00738     | 0 | 0.1    | 623.312  | 1867.921 | 2.69  | 0.00168  | 4.906315 |
| P00738     | 0 | 0.9231 | 432.725  | 1727.878 | 5.18  | 0.00224  | 0        |
| P00739; P0 | 0 | 0.625  | 573.852  | 1146.697 | -0.46 | -0.00027 | 22.40576 |
| P35527     | 0 | 1      | 896.3699 | 1791.733 | 2.73  | 0.00244  | 0        |
| P35527     | 0 | 1      | 616.8042 | 1232.601 | 2.69  | 0.00166  | 0        |
| P35527     | 0 | 1      | 618.2692 | 1235.531 | 1.99  | 0.00123  | 0        |

|            |   |        |          |          |       |          |          |
|------------|---|--------|----------|----------|-------|----------|----------|
| P35527     | 0 | 0.9872 | 625.6638 | 1874.977 | 3.7   | 0.00231  | 5.989451 |
| P35527     | 0 | 1      | 459.5715 | 1376.7   | 0     | 0        | 12.92555 |
| P35527     | 0 | 1      | 460.5502 | 1379.636 | 3.82  | 0.00176  | 51.88376 |
| P35527     | 0 | 0.725  | 602.8385 | 1204.67  | 3.61  | 0.00217  | 13.70412 |
| P35527     | 0 | 0.5429 | 470.601  | 1409.789 | 0.52  | 0.00025  | 0        |
| P35527     | 0 | 0.5385 | 376.1838 | 1126.537 | 0.98  | 0.00037  | 30.57482 |
| P35527     | 0 | 1      | 498.9421 | 1494.812 | 2.74  | 0.00136  | 15.6873  |
| P35527     | 0 | 0.8    | 605.8072 | 1210.607 | 5.32  | 0.00322  | 4.991724 |
| P35527     | 0 | 1      | 541.2506 | 1081.494 | -0.28 | -0.00015 | 0        |
| P35527     | 0 | 0.9286 | 616.8037 | 1232.6   | 1.9   | 0.00117  | 4.245039 |
| P35527     | 0 | 1      | 618.2686 | 1235.53  | 0.9   | 0.00056  | 0        |
| P35527     | 0 | 0.7568 | 521.2621 | 1041.517 | 1.3   | 0.00068  | 6.579479 |
| P35527     | 0 | 1      | 533.2537 | 1065.5   | 0.78  | 0.00042  | 9.834361 |
| P04264     | 0 | 0.8958 | 581.8569 | 1162.707 | 2.76  | 0.0016   | 49.20056 |
| P04264     | 0 | 0.9688 | 540.6227 | 1619.854 | 1.68  | 0.00091  | 24.21158 |
| P04264     | 0 | 0.9828 | 810.4312 | 1619.855 | 2.52  | 0.00204  | 3.679964 |
| Q7Z794; P3 | 0 | 0.9778 | 588.6707 | 1763.998 | 4.65  | 0.00273  | 64.9304  |
| P04264     | 0 | 0.8539 | 795.9645 | 1590.922 | 1.53  | 0.00121  | 7.791595 |
| P04264     | 0 | 0.9512 | 518.6195 | 1553.844 | 1.7   | 0.00088  | 21.95787 |
| P04264     | 0 | 0.88   | 589.3143 | 1177.621 | 2.69  | 0.00159  | 1.442891 |
| P04264     | 0 | 0.9714 | 581.8554 | 1162.703 | 0.03  | 0.00002  | 64.09101 |
| P04264     | 0 | 0.8605 | 589.3148 | 1177.622 | 3.52  | 0.00207  | 17.87667 |
| P04264     | 0 | 0.8605 | 589.3153 | 1177.623 | 4.45  | 0.00262  | 20.09166 |
| P04264     | 0 | 0.871  | 540.6227 | 1619.853 | 1.57  | 0.00085  | 0        |
| P04264     | 0 | 1      | 429.8895 | 1287.654 | 3.67  | 0.00158  | 38.94283 |
| P04264     | 0 | 0.9333 | 517.2623 | 1033.517 | 1.19  | 0.00061  | 14.48141 |
| P04264     | 0 | 1      | 637.2846 | 1909.839 | 1.21  | 0.00077  | 0        |
| P04264     | 0 | 0.7931 | 451.9145 | 1353.729 | 2.71  | 0.00122  | 22.81365 |
| P04264     | 0 | 0.8611 | 488.7997 | 976.5921 | 1.36  | 0.00067  | 21.70732 |
| P04264     | 0 | 0.5429 | 546.8114 | 1092.616 | 1.49  | 0.00081  | 41.32553 |
| P04264     | 0 | 0.7619 | 557.9708 | 1671.898 | 2.09  | 0.00116  | 40.34591 |
| P04264     | 0 | 0.7037 | 644.3298 | 1287.652 | 2.31  | 0.00149  | 5.924978 |
| Q7Z794; P3 | 0 | 0.5    | 540.6342 | 1619.888 | 0.36  | 0.00019  | 5.406788 |
| Q04756     | 0 | 1      | 489.8902 | 1467.656 | 0.33  | 0.00016  | 15.67211 |
| Q04756     | 0 | 1      | 862.4514 | 2585.34  | -1.06 | -0.00091 | 5.12492  |
| Q04756     | 1 | 1      | 580.6244 | 1739.859 | 3.47  | 0.00201  | 13.92158 |
| Q04756     | 0 | 1      | 400.9426 | 1600.749 | 2.89  | 0.00116  | 22.17219 |
| Q04756     | 0 | 1      | 702.3971 | 2105.177 | 2.11  | 0.00148  | 9.672229 |
| Q04756     | 0 | 0.8837 | 543.2987 | 1627.882 | 2.12  | 0.00115  | 25.94655 |
| Q04756     | 0 | 1      | 489.8906 | 1467.657 | 1.08  | 0.00053  | 33.91015 |
| Q04756     | 0 | 1      | 647.2974 | 1939.878 | 2.45  | 0.00158  | 9.49091  |
| Q04756     | 0 | 0.8333 | 862.4548 | 2585.35  | 2.83  | 0.00244  | 27.40079 |
| Q04756     | 0 | 1      | 569.921  | 1707.749 | 2.18  | 0.00124  | 10.88539 |
| Q04756     | 0 | 0.5862 | 647.2999 | 1939.885 | 6.41  | 0.00415  | 18.68185 |
| Q04756     | 0 | 0.6562 | 430.5486 | 1289.631 | 2.71  | 0.00117  | 8.129224 |
| Q04756     | 0 | 0.8571 | 694.0115 | 2080.02  | 1.85  | 0.00128  | 5.353076 |
| Q04756     | 0 | 0.8611 | 645.3189 | 1289.631 | 2.27  | 0.00146  | 3.193021 |
| Q04756     | 0 | 0.92   | 623.2983 | 1245.589 | 2.1   | 0.00131  | 0        |
| Q04756     | 0 | 0.8387 | 645.319  | 1289.631 | 2.37  | 0.00153  | 0        |
| Q04756     | 0 | 1      | 647.2971 | 1939.877 | 1.98  | 0.00128  | 0        |
| P03951     | 0 | 1      | 457.2388 | 1369.702 | 0.36  | 0.00016  | 31.20362 |
| P03951     | 0 | 0.8276 | 678.6613 | 2033.969 | 1.67  | 0.00113  | 11.89216 |

|        |   |        |          |          |       |          |          |
|--------|---|--------|----------|----------|-------|----------|----------|
| P03951 | 0 | 1      | 540.9323 | 1620.782 | -0.04 | -0.00002 | 16.12831 |
| P03951 | 0 | 0.8182 | 386.5452 | 1157.621 | 2.38  | 0.00092  | 18.98826 |
| P03951 | 0 | 1      | 540.2958 | 1618.873 | 1.05  | 0.00057  | 0        |
| P03951 | 0 | 1      | 470.2455 | 1408.722 | 4.52  | 0.00212  | 9.023875 |
| P03951 | 0 | 0.6944 | 533.6292 | 1598.873 | 1.81  | 0.00096  | 16.7834  |
| P03951 | 0 | 0.9615 | 745.3693 | 2234.093 | 2.02  | 0.0015   | 19.55761 |
| P03951 | 0 | 0.7273 | 562.8507 | 1124.694 | 2.12  | 0.00119  | 33.57146 |
| P03951 | 0 | 0.8824 | 581.3174 | 1161.627 | 3.71  | 0.00216  | 10.41822 |
| P03951 | 0 | 0.675  | 566.8511 | 1132.695 | 1.92  | 0.00109  | 7.214792 |
| Q92954 | 0 | 0.7895 | 629.3302 | 1885.976 | 3.41  | 0.00215  | 0        |
| Q92954 | 0 | 0.6042 | 523.8085 | 1046.61  | 1.31  | 0.00068  | 38.63663 |
| Q92954 | 0 | 0.8431 | 548.3112 | 1095.615 | 1.34  | 0.00074  | 0        |
| Q92954 | 0 | 1      | 802.9207 | 1604.834 | -0.61 | -0.00049 | 70.9383  |
| Q92954 | 0 | 1      | 599.0241 | 1795.058 | 1.1   | 0.00066  | 30.46271 |
| Q92954 | 1 | 0.8214 | 504.6029 | 1511.794 | 2     | 0.00101  | 43.43458 |
| Q92954 | 0 | 0.7447 | 561.8171 | 1122.627 | 2.26  | 0.00127  | 7.51176  |
| Q92954 | 0 | 0.7442 | 590.347  | 1179.687 | 3.71  | 0.00219  | 27.4754  |
| Q92954 | 0 | 0.5714 | 505.2523 | 1513.742 | 1.37  | 0.00069  | 4.088009 |
| Q92954 | 0 | 0.88   | 482.2738 | 1444.807 | 2.04  | 0.00098  | 12.76896 |
| Q92954 | 0 | 0.8571 | 535.6168 | 1604.836 | 0.49  | 0.00026  | 63.43634 |
| Q92954 | 0 | 1      | 452.5692 | 1355.693 | 2.26  | 0.00102  | 22.79264 |
| Q92954 | 0 | 0.6579 | 523.8086 | 1046.61  | 1.42  | 0.00075  | 100      |
| P02766 | 1 | 1      | 604.313  | 1810.924 | 1.68  | 0.00101  | 8.723731 |
| P02766 | 1 | 1      | 604.313  | 1810.924 | 1.68  | 0.00101  | 8.723731 |
| P02766 | 1 | 1      | 604.314  | 1810.927 | 3.29  | 0.00199  | 8.555555 |
| P02766 | 1 | 1      | 604.314  | 1810.927 | 3.29  | 0.00199  | 8.555555 |
| P02766 | 1 | 1      | 453.4865 | 1810.924 | 1.64  | 0.00074  | 11.30028 |
| P02766 | 1 | 1      | 453.4865 | 1810.924 | 1.64  | 0.00074  | 11.30028 |
| P02766 | 1 | 1      | 546.9898 | 1638.955 | -0.7  | -0.00038 | 69.78943 |
| P02766 | 0 | 1      | 378.4712 | 1510.863 | 1.24  | 0.00047  | 0        |
| P02766 | 0 | 1      | 504.291  | 1510.858 | -1.76 | -0.00089 | 36.4107  |
| P02766 | 0 | 1      | 504.2926 | 1510.863 | 1.39  | 0.0007   | 46.18596 |
| P02766 | 0 | 0.9474 | 561.6154 | 1682.832 | 3.03  | 0.0017   | 12.58949 |
| P02766 | 0 | 1      | 504.2918 | 1510.861 | -0.06 | -0.00003 | 25.94839 |
| P02766 | 1 | 0.9744 | 595.0262 | 1783.064 | 3.32  | 0.00197  | 18.96031 |
| P02766 | 1 | 1      | 446.5211 | 1783.063 | 2.56  | 0.00114  | 30.60761 |
| P02766 | 1 | 1      | 595.0264 | 1783.065 | 3.73  | 0.00222  | 20.62808 |
| P02766 | 1 | 1      | 446.5211 | 1783.063 | 2.56  | 0.00114  | 23.687   |
| P02766 | 0 | 1      | 504.2922 | 1510.862 | 0.61  | 0.00031  | 15.76781 |
| P02766 | 0 | 1      | 504.2927 | 1510.863 | 1.58  | 0.00079  | 4.898794 |
| P02766 | 0 | 1      | 755.9358 | 1510.864 | 2.15  | 0.00162  | 3.199323 |
| P02766 | 0 | 1      | 456.2576 | 1366.758 | -0.62 | -0.00028 | 35.6737  |
| P02766 | 0 | 1      | 504.2928 | 1510.864 | 1.88  | 0.00095  | 4.038014 |
| P02766 | 0 | 1      | 504.2926 | 1510.863 | 1.45  | 0.00073  | 5.446237 |
| P02766 | 0 | 1      | 456.2581 | 1366.76  | 0.52  | 0.00024  | 1.349752 |
| P02766 | 0 | 1      | 683.8842 | 1366.761 | 1.49  | 0.00102  | 1.013427 |
| P02766 | 0 | 1      | 456.2583 | 1366.76  | 1.06  | 0.00048  | 6.610992 |
| P02766 | 0 | 1      | 683.8845 | 1366.762 | 1.94  | 0.00133  | 3.713634 |
| P02766 | 0 | 1      | 456.2585 | 1366.761 | 1.46  | 0.00067  | 0        |
| P02766 | 0 | 1      | 683.8846 | 1366.762 | 2.21  | 0.00151  | 1.616585 |
| P02766 | 0 | 1      | 456.2587 | 1366.762 | 1.86  | 0.00085  | 22.64582 |
| P02766 | 0 | 1      | 456.2582 | 1366.76  | 0.66  | 0.0003   | 20.15794 |

|        |   |        |          |          |       |          |          |
|--------|---|--------|----------|----------|-------|----------|----------|
| P02766 | 0 | 1      | 649.5837 | 2595.313 | 2.28  | 0.00148  | 33.72268 |
| P02766 | 0 | 1      | 649.5843 | 2595.315 | 3.13  | 0.00203  | 15.1104  |
| P02766 | 0 | 1      | 865.7759 | 2595.313 | 2.26  | 0.00196  | 0        |
| P02766 | 0 | 1      | 649.5837 | 2595.313 | 2.19  | 0.00142  | 3.652207 |
| P02766 | 1 | 1      | 551.0881 | 2751.412 | 1.18  | 0.00065  | 9.041449 |
| P02766 | 0 | 0.9286 | 561.6155 | 1682.832 | 3.25  | 0.00182  | 8.779822 |
| P02766 | 1 | 1      | 695.1278 | 2777.489 | 1.45  | 0.00101  | 13.59384 |
| P02766 | 0 | 0.8548 | 841.9188 | 1682.83  | 2.28  | 0.00192  | 5.681471 |
| P02766 | 0 | 0.8772 | 561.6163 | 1682.834 | 4.77  | 0.00268  | 27.52516 |
| P02766 | 2 | 1      | 734.1531 | 2933.591 | 1.53  | 0.00112  | 6.366961 |
| P02766 | 1 | 1      | 926.502  | 2777.491 | 2.29  | 0.00212  | 5.705649 |
| P02766 | 0 | 0.9615 | 883.4907 | 2648.458 | 5.7   | 0.00503  | 3.644147 |
| P02766 | 1 | 1      | 1317.195 | 2633.383 | 0.11  | 0.00014  | 0        |
| P02766 | 1 | 1      | 878.4676 | 2633.388 | 1.96  | 0.00172  | 9.772348 |
| P02766 | 0 | 0.975  | 915.1246 | 2743.359 | 1.43  | 0.00131  | 7.383872 |
| P02766 | 2 | 1      | 930.5003 | 2789.486 | 0.79  | 0.00073  | 1.993159 |
| P02766 | 2 | 0.975  | 978.5361 | 2933.594 | 2.59  | 0.00254  | 4.089589 |
| P02766 | 2 | 1      | 734.1528 | 2933.59  | 1.11  | 0.00082  | 29.21631 |
| P02766 | 1 | 0.9688 | 701.8913 | 2804.543 | -0.1  | -0.00007 | 30.91034 |
| P02766 | 1 | 0.9815 | 604.3138 | 1810.927 | 2.99  | 0.00181  | 10.57843 |
| P02766 | 1 | 0.9815 | 604.3138 | 1810.927 | 2.99  | 0.00181  | 10.57843 |
| P02766 | 1 | 1      | 652.3477 | 1955.029 | 2.64  | 0.00172  | 23.58516 |
| P02766 | 1 | 0.9412 | 489.5123 | 1955.027 | 2.07  | 0.00101  | 27.99917 |
| P02766 | 1 | 0.7931 | 489.5127 | 1955.029 | 2.76  | 0.00135  | 67.56787 |
| P02766 | 1 | 1      | 652.3485 | 1955.031 | 3.86  | 0.00251  | 21.81575 |
| P02766 | 0 | 1      | 561.6154 | 1682.832 | 3.14  | 0.00176  | 13.93065 |
| P02766 | 0 | 0.7755 | 841.92   | 1682.833 | 3.73  | 0.00314  | 6.925662 |
| P02766 | 2 | 0.9302 | 734.1533 | 2933.591 | 1.7   | 0.00124  | 7.383788 |
| P02766 | 0 | 0.8571 | 686.5949 | 2743.358 | 0.94  | 0.00064  | 53.97847 |
| P02766 | 1 | 1      | 695.1276 | 2777.489 | 1.28  | 0.00089  | 7.305963 |
| P02766 | 1 | 1      | 410.4949 | 1638.958 | 1.15  | 0.00047  | 28.81027 |
| P02766 | 2 | 0.9487 | 930.501  | 2789.488 | 1.51  | 0.0014   | 2.755229 |
| P02766 | 2 | 1      | 698.1273 | 2789.487 | 1.09  | 0.00076  | 5.908988 |
| P02766 | 1 | 1      | 498.9571 | 1494.857 | 1.91  | 0.00095  | 23.97732 |
| P02766 | 1 | 1      | 446.521  | 1783.062 | 2.21  | 0.00099  | 58.7527  |
| P02766 | 0 | 0.9231 | 649.5831 | 2595.311 | 1.34  | 0.00087  | 39.86946 |
| P02766 | 0 | 1      | 504.2936 | 1510.866 | 3.51  | 0.00177  | 26.67206 |
| P02766 | 0 | 1      | 504.292  | 1510.862 | 0.3   | 0.00015  | 59.20649 |
| P02766 | 2 | 0.9375 | 790.4258 | 3158.681 | 5.94  | 0.00469  | 38.37012 |
| P02766 | 0 | 0.6744 | 769.8673 | 1538.727 | 1.87  | 0.00144  | 15.93497 |
| P02766 | 0 | 1      | 378.4714 | 1510.864 | 1.81  | 0.00068  | 0        |
| P02766 | 0 | 0.9231 | 378.4715 | 1510.864 | 2.13  | 0.00081  | 0        |
| P02766 | 0 | 1      | 649.5842 | 2595.315 | 2.94  | 0.00191  | 37.9038  |
| P02766 | 1 | 0.9565 | 926.5031 | 2777.495 | 3.48  | 0.00322  | 0        |
| P02766 | 1 | 0.75   | 935.5219 | 2804.551 | 2.62  | 0.00245  | 3.852736 |
| P02766 | 1 | 0.8889 | 551.0872 | 2751.407 | -0.48 | -0.00027 | 48.61059 |
| P02766 | 0 | 1      | 649.5834 | 2595.312 | 1.81  | 0.00118  | 61.17326 |
| P02760 | 1 | 0.9783 | 630.6621 | 1889.972 | 4.08  | 0.00257  | 6.066453 |
| P02760 | 0 | 1      | 607.3416 | 1213.676 | 3.03  | 0.00184  | 4.711957 |
| P02760 | 0 | 0.8929 | 607.3426 | 1213.678 | 4.74  | 0.00288  | 56.49397 |
| P02760 | 1 | 1      | 630.6607 | 1889.968 | 1.95  | 0.00123  | 0        |
| P02760 | 0 | 0.9074 | 607.342  | 1213.677 | 3.73  | 0.00226  | 13.06826 |

|        |   |        |          |          |       |          |          |
|--------|---|--------|----------|----------|-------|----------|----------|
| P02760 | 0 | 1      | 453.2635 | 1357.776 | 1.25  | 0.00057  | 5.807553 |
| P02760 | 0 | 0.931  | 679.3909 | 1357.774 | 0.18  | 0.00012  | 3.238925 |
| P02760 | 0 | 0.881  | 453.2635 | 1357.776 | 1.18  | 0.00054  | 13.44236 |
| P02760 | 0 | 0.9804 | 453.2643 | 1357.778 | 3.07  | 0.00139  | 41.72086 |
| P02760 | 0 | 0.9882 | 717.0421 | 2149.112 | 1.78  | 0.00127  | 6.641734 |
| P02760 | 0 | 1      | 843.4295 | 2528.274 | 1.4   | 0.00118  | 4.289174 |
| P02760 | 0 | 1      | 1264.64  | 2528.273 | 1.21  | 0.00154  | 0        |
| P02760 | 0 | 1      | 722.3751 | 2165.111 | 3.66  | 0.00264  | 16.20148 |
| P02760 | 0 | 0.9787 | 722.3735 | 2165.106 | 1.47  | 0.00106  | 2.092609 |
| P02760 | 0 | 1      | 926.9303 | 1852.853 | 1.6   | 0.00148  | 0        |
| P02760 | 0 | 1      | 618.29   | 1852.856 | 2.81  | 0.00174  | 0        |
| P02760 | 0 | 1      | 1032.533 | 2064.059 | 1.9   | 0.00196  | 0        |
| P02760 | 0 | 1      | 688.6907 | 2064.057 | 1.1   | 0.00076  | 4.418777 |
| P02760 | 0 | 1      | 688.6912 | 2064.059 | 1.9   | 0.0013   | 1.572001 |
| P02760 | 0 | 0.8421 | 417.2478 | 1249.729 | 2.6   | 0.00108  | 17.67913 |
| P02760 | 0 | 0.9672 | 417.2473 | 1249.727 | 1.57  | 0.00066  | 14.3636  |
| P02760 | 0 | 0.9206 | 625.3677 | 1249.728 | 2.15  | 0.00134  | 6.68641  |
| P02760 | 0 | 0.9804 | 417.2475 | 1249.728 | 1.87  | 0.00078  | 21.90099 |
| P02760 | 0 | 1      | 926.9312 | 1852.855 | 2.52  | 0.00234  | 4.79497  |
| P02760 | 0 | 1      | 926.9294 | 1852.852 | 0.68  | 0.00063  | 3.448659 |
| P02760 | 0 | 1      | 618.2897 | 1852.854 | 2.22  | 0.00137  | 4.206442 |
| P02760 | 0 | 1      | 926.9309 | 1852.854 | 2.19  | 0.00203  | 3.418346 |
| P02760 | 0 | 1      | 618.2911 | 1852.859 | 4.59  | 0.00284  | 3.601605 |
| P02760 | 0 | 0.9722 | 666.358  | 1997.059 | 1.83  | 0.00122  | 3.832776 |
| P02760 | 0 | 1      | 926.9312 | 1852.855 | 2.52  | 0.00234  | 8.143332 |
| P02760 | 0 | 1      | 926.9301 | 1852.853 | 1.4   | 0.0013   | 3.587534 |
| P02760 | 0 | 1      | 618.2894 | 1852.854 | 1.82  | 0.00113  | 4.871056 |
| P02760 | 0 | 1      | 926.9308 | 1852.854 | 2.13  | 0.00197  | 2.679948 |
| P02760 | 0 | 1      | 618.2902 | 1852.856 | 3.11  | 0.00192  | 8.575316 |
| P02760 | 1 | 0.9787 | 630.6605 | 1889.967 | 1.56  | 0.00099  | 3.411857 |
| P02760 | 1 | 0.878  | 473.2473 | 1889.967 | 1.88  | 0.00089  | 19.6838  |
| P02760 | 1 | 1      | 630.6614 | 1889.97  | 3.11  | 0.00196  | 11.61899 |
| P02760 | 0 | 1      | 926.9285 | 1852.85  | -0.31 | -0.00029 | 3.491387 |
| P02760 | 0 | 1      | 618.2887 | 1852.852 | 0.64  | 0.00039  | 4.156075 |
| P02760 | 0 | 1      | 854.8789 | 1708.751 | 1.31  | 0.00112  | 36.55689 |
| P02760 | 1 | 1      | 841.7178 | 2523.139 | 2.02  | 0.0017   | 28.27684 |
| P02760 | 1 | 1      | 631.5403 | 2523.14  | 2.26  | 0.00143  | 7.777102 |
| P02760 | 0 | 1      | 809.3887 | 1617.77  | 2.07  | 0.00167  | 6.920965 |
| P02760 | 0 | 1      | 848.9877 | 1696.968 | 0.94  | 0.0008   | 5.705739 |
| P02760 | 0 | 0.8491 | 566.327  | 1696.966 | -0.08 | -0.00004 | 0        |
| P02760 | 0 | 1      | 417.2467 | 1249.726 | 0.11  | 0.00004  | 47.01463 |
| P02760 | 0 | 0.9286 | 607.3422 | 1213.677 | 4.03  | 0.00245  | 38.22062 |
| P02760 | 0 | 0.9375 | 417.2466 | 1249.725 | -0.33 | -0.00014 | 24.35148 |
| P02760 | 0 | 1      | 618.2913 | 1852.859 | 4.79  | 0.00296  | 0        |
| P02760 | 0 | 0.9615 | 717.0418 | 2149.111 | 1.27  | 0.00091  | 47.31755 |
| P02760 | 0 | 0.7    | 666.3572 | 1997.057 | 0.64  | 0.00043  | 67.65759 |
| P02760 | 0 | 0.88   | 717.0411 | 2149.109 | 0.33  | 0.00024  | 44.92117 |
| P02760 | 0 | 1      | 776.9355 | 1552.864 | -0.46 | -0.00036 | 8.139161 |
| P02760 | 0 | 0.9667 | 618.2903 | 1852.856 | 3.21  | 0.00198  | 53.37071 |
| P02760 | 0 | 1      | 539.9277 | 1617.768 | 1     | 0.00054  | 44.46853 |
| P02760 | 1 | 0.9737 | 630.6621 | 1889.972 | 4.08  | 0.00257  | 14.84517 |
| P02760 | 0 | 0.8372 | 607.3412 | 1213.675 | 2.42  | 0.00147  | 0        |

|        |   |        |          |          |       |          |          |
|--------|---|--------|----------|----------|-------|----------|----------|
| P02760 | 0 | 0.9091 | 583.3206 | 1165.634 | 0.52  | 0.0003   | 3.327689 |
| P02760 | 1 | 1      | 841.7172 | 2523.137 | 1.23  | 0.00103  | 0        |
| P02760 | 0 | 0.9643 | 926.931  | 1852.855 | 2.39  | 0.00222  | 7.145191 |
| P02760 | 0 | 0.8696 | 625.3698 | 1249.732 | 5.37  | 0.00335  | 0        |
| P02760 | 0 | 0.8636 | 679.3912 | 1357.775 | 0.72  | 0.00049  | 19.13122 |
| P02760 | 0 | 0.8571 | 717.0406 | 2149.107 | -0.35 | -0.00025 | 14.13644 |
| P02760 | 0 | 1      | 640.6572 | 1919.957 | 1.98  | 0.00127  | 3.6789   |
| P02760 | 0 | 0.4762 | 666.3582 | 1997.06  | 2.2   | 0.00146  | 0        |
| P02760 | 0 | 1      | 688.6912 | 2064.059 | 1.9   | 0.0013   | 3.363958 |
| P02760 | 0 | 1      | 632.8254 | 2528.28  | 3.67  | 0.00232  | 4.224435 |
| P02760 | 0 | 0.8095 | 679.3919 | 1357.776 | 1.62  | 0.0011   | 20.50048 |
| P02760 | 0 | 0.8421 | 516.77   | 2064.058 | 1.48  | 0.00076  | 0        |
| P02760 | 0 | 1      | 960.4819 | 1919.957 | 1.8   | 0.00173  | 0        |
| P07357 | 0 | 0.9464 | 624.8417 | 1248.676 | 1.79  | 0.00112  | 2.9304   |
| P07357 | 0 | 1      | 534.6154 | 1601.832 | 0.57  | 0.0003   | 5.95897  |
| P07357 | 0 | 0.766  | 569.3078 | 1137.608 | 2.55  | 0.00145  | 4.53705  |
| P07357 | 0 | 1      | 632.8389 | 1264.671 | 1.45  | 0.00092  | 4.179696 |
| P07357 | 0 | 0.9756 | 534.6151 | 1601.831 | -0.12 | -0.00006 | 5.550167 |
| P07357 | 0 | 0.619  | 447.947  | 1341.827 | 0.79  | 0.00035  | 13.31176 |
| P07357 | 0 | 1      | 932.7454 | 2796.222 | 2.62  | 0.00245  | 0        |
| P07357 | 0 | 1      | 781.7493 | 2343.233 | 2     | 0.00156  | 11.48596 |
| P07357 | 0 | 1      | 781.7482 | 2343.23  | 0.51  | 0.0004   | 5.770126 |
| P07357 | 0 | 1      | 742.3592 | 2225.063 | -0.18 | -0.00013 | 41.80221 |
| P07357 | 0 | 1      | 742.361  | 2225.069 | 2.29  | 0.0017   | 7.027274 |
| P07357 | 0 | 1      | 553.2611 | 1657.769 | 1.28  | 0.00071  | 13.85172 |
| P07357 | 0 | 1      | 742.3605 | 2225.067 | 1.63  | 0.00121  | 18.31211 |
| P07357 | 0 | 1      | 645.8277 | 1290.648 | 1.96  | 0.00126  | 21.30411 |
| P07357 | 0 | 0.9655 | 670.3465 | 2009.025 | 1.88  | 0.00126  | 15.34272 |
| P07357 | 0 | 0.6176 | 447.5982 | 1340.78  | 1.76  | 0.00079  | 14.16252 |
| P07357 | 0 | 0.9804 | 486.5822 | 1457.732 | 2.37  | 0.00115  | 13.85847 |
| P07357 | 0 | 1      | 699.8108 | 2796.221 | 2.49  | 0.00174  | 33.06617 |
| P07357 | 0 | 0.7941 | 416.8966 | 1248.675 | 1.22  | 0.00051  | 13.37835 |
| P07357 | 0 | 0.7941 | 379.874  | 1137.608 | 1.84  | 0.0007   | 16.89205 |
| P07357 | 0 | 0.3514 | 671.4175 | 1341.828 | 1.75  | 0.00118  | 10.29956 |
| P07357 | 0 | 0.7045 | 559.8325 | 1118.658 | 1.43  | 0.0008   | 0        |
| P07357 | 0 | 0.7419 | 447.5984 | 1340.781 | 2.31  | 0.00103  | 29.75507 |
| P07357 | 0 | 0.8824 | 742.3613 | 2225.069 | 2.62  | 0.00194  | 11.68507 |
| P07357 | 0 | 1      | 694.3262 | 2080.964 | 1.25  | 0.00087  | 0        |
| P07357 | 0 | 0.9    | 503.0112 | 2009.023 | 0.9   | 0.00045  | 13.56808 |
| P80108 | 0 | 1      | 522.2871 | 1564.847 | 1.05  | 0.00055  | 3.513576 |
| P80108 | 0 | 1      | 572.3293 | 1714.973 | 0.72  | 0.00041  | 52.53463 |
| P80108 | 0 | 0.8485 | 528.9601 | 1584.866 | 0.07  | 0.00003  | 0        |
| P80108 | 0 | 0.8909 | 600.6665 | 1799.985 | 3.78  | 0.00227  | 4.061333 |
| P80108 | 0 | 0.5349 | 460.2595 | 1378.764 | 2.12  | 0.00098  | 7.805146 |
| P80108 | 0 | 1      | 851.1769 | 3401.686 | 2.02  | 0.00171  | 14.04497 |
| P80108 | 0 | 0.8358 | 670.853  | 1340.699 | 1.34  | 0.0009   | 20.02559 |
| P80108 | 0 | 1      | 416.5677 | 1247.689 | 1.73  | 0.00072  | 11.38222 |
| P80108 | 0 | 1      | 512.2664 | 1534.785 | 2.17  | 0.00111  | 10.16142 |
| P80108 | 0 | 0.6562 | 624.3483 | 1247.689 | 2.25  | 0.0014   | 20.44608 |
| P80108 | 0 | 0.6667 | 689.8848 | 1378.762 | 0.98  | 0.00068  | 4.286338 |
| P80108 | 0 | 1      | 631.6928 | 1893.064 | 3.46  | 0.00218  | 13.07485 |
| P80108 | 0 | 0.8846 | 732.3956 | 1463.784 | 4.58  | 0.00335  | 26.45258 |

|        |   |        |          |          |      |         |          |
|--------|---|--------|----------|----------|------|---------|----------|
| P80108 | 0 | 1      | 535.287  | 1603.846 | 3.51 | 0.00188 | 9.654145 |
| P80108 | 0 | 1      | 767.8955 | 1534.784 | 1.54 | 0.00118 | 43.34811 |
| P80108 | 0 | 1      | 947.0353 | 1893.063 | 3.31 | 0.00313 | 55.70242 |
| Q96PD5 | 0 | 0.9667 | 620.3179 | 1858.939 | 3.36 | 0.00208 | 18.83502 |
| Q96PD5 | 0 | 0.9706 | 465.4898 | 1858.937 | 2.3  | 0.00107 | 4.512564 |
| Q96PD5 | 0 | 1      | 520.2589 | 2078.014 | 1.4  | 0.00073 | 25.39145 |
| Q96PD5 | 0 | 0.9697 | 693.3425 | 2078.013 | 1.15 | 0.00079 | 0        |
| Q96PD5 | 0 | 0.9677 | 424.75   | 1695.978 | 0.4  | 0.00017 | 0        |
| Q96PD5 | 0 | 1      | 565.9998 | 1695.985 | 4.26 | 0.00241 | 33.23626 |
| Q96PD5 | 0 | 0.9667 | 424.7502 | 1695.979 | 0.91 | 0.00039 | 4.09347  |
| Q96PD5 | 0 | 1      | 565.9989 | 1695.982 | 2.75 | 0.00156 | 5.156072 |
| Q96PD5 | 0 | 1      | 746.8599 | 1492.713 | 1.69 | 0.00126 | 12.27376 |
| Q96PD5 | 0 | 1      | 818.9115 | 1636.816 | 2.2  | 0.0018  | 15.02804 |
| Q96PD5 | 0 | 1      | 630.3232 | 1888.955 | 2.94 | 0.00185 | 6.415331 |
| Q96PD5 | 0 | 1      | 630.3231 | 1888.955 | 2.75 | 0.00173 | 2.169342 |
| Q96PD5 | 0 | 1      | 823.4283 | 1645.849 | 2.22 | 0.00182 | 27.42413 |
| Q96PD5 | 0 | 0.9348 | 549.2871 | 1645.847 | 0.61 | 0.00034 | 8.716537 |
| Q96PD5 | 0 | 0.8039 | 549.2878 | 1645.849 | 1.95 | 0.00107 | 9.568415 |
| Q96PD5 | 0 | 0.7414 | 388.206  | 1162.603 | 2.29 | 0.00089 | 4.936467 |
| Q96PD5 | 0 | 1      | 800.6782 | 3199.691 | 0.86 | 0.00069 | 4.835224 |
| Q96PD5 | 0 | 1      | 1067.234 | 3199.689 | 0.08 | 0.00009 | 0        |
| Q96PD5 | 0 | 1      | 839.1868 | 3353.725 | 1.4  | 0.00117 | 1.40013  |
| Q96PD5 | 0 | 1      | 1118.582 | 3353.73  | 2.77 | 0.0031  | 2.055639 |
| Q96PD5 | 0 | 1      | 1009.218 | 3025.64  | 2.39 | 0.00241 | 3.646098 |
| Q96PD5 | 0 | 1      | 891.0826 | 2671.233 | 1.75 | 0.00156 | 2.705177 |
| Q96PD5 | 0 | 1      | 668.564  | 2671.234 | 2.09 | 0.00139 | 4.881982 |
| Q96PD5 | 0 | 0.9792 | 843.0491 | 2527.133 | 2.38 | 0.00201 | 24.23079 |
| Q96PD5 | 0 | 0.8846 | 549.2871 | 1645.847 | 0.5  | 0.00027 | 50.04065 |
| Q96PD5 | 0 | 1      | 472.9939 | 1888.954 | 2.19 | 0.00104 | 10.7794  |
| Q96PD5 | 0 | 0.7826 | 517.9647 | 1551.88  | 2.7  | 0.0014  | 6.63875  |
| Q96PD5 | 0 | 0.6316 | 611.8694 | 1222.731 | 2.42 | 0.00148 | 6.246268 |
| Q96PD5 | 0 | 0.1905 | 559.282  | 2234.106 | 1.55 | 0.00086 | 14.13651 |
| Q96PD5 | 0 | 1      | 843.0472 | 2527.127 | 0.14 | 0.00012 | 3.754347 |
| Q96PD5 | 0 | 0.9216 | 539.8176 | 1078.628 | 1.28 | 0.00069 | 3.471161 |
| Q96PD5 | 0 | 0.8636 | 745.3749 | 2234.11  | 3.41 | 0.00254 | 26.89815 |
| Q96PD5 | 0 | 1      | 693.3436 | 2078.016 | 2.65 | 0.00183 | 7.700942 |
| Q96PD5 | 0 | 1      | 472.9935 | 1888.952 | 1.42 | 0.00067 | 3.604031 |
| Q96PD5 | 0 | 0.8182 | 630.3242 | 1888.958 | 4.49 | 0.00283 | 30.50623 |
| Q96PD5 | 0 | 0.8571 | 745.3766 | 2234.115 | 5.62 | 0.00419 | 5.958794 |
| Q96PD5 | 0 | 0.6944 | 611.87   | 1222.733 | 3.42 | 0.00209 | 7.54864  |
| Q96PD5 | 0 | 1      | 388.7247 | 1551.877 | 1    | 0.00039 | 4.440742 |
| Q96PD5 | 0 | 0.5714 | 465.489  | 1858.934 | 0.73 | 0.00034 | 10.89546 |
| P02750 | 0 | 0.84   | 662.3916 | 1323.776 | 0.5  | 0.00033 | 0        |
| P02750 | 0 | 0.8627 | 662.3919 | 1323.776 | 0.87 | 0.00058 | 3.339704 |
| P02750 | 1 | 1      | 471.0467 | 1881.165 | 0.2  | 0.00009 | 64.66068 |
| P02750 | 1 | 1      | 392.2308 | 1565.902 | 1.45 | 0.00057 | 36.68343 |
| P02750 | 0 | 0.8305 | 594.8835 | 1188.76  | 3.7  | 0.0022  | 26.769   |
| P02750 | 0 | 0.9355 | 648.8622 | 1296.717 | 2.43 | 0.00158 | 4.41989  |
| P02750 | 0 | 0.925  | 432.9106 | 1296.717 | 2.42 | 0.00105 | 9.370338 |
| P02750 | 0 | 1      | 432.9104 | 1296.717 | 1.93 | 0.00083 | 38.42506 |
| P02750 | 0 | 0.7867 | 495.2806 | 989.5539 | 1.26 | 0.00063 | 13.27008 |
| P02750 | 0 | 0.551  | 378.5571 | 1133.657 | 1.67 | 0.00063 | 0        |

|        |   |        |          |          |      |         |          |
|--------|---|--------|----------|----------|------|---------|----------|
| P02750 | 0 | 0.8605 | 567.3326 | 1133.658 | 2.76 | 0.00157 | 11.63438 |
| P02750 | 0 | 1      | 1315.111 | 2629.215 | 1.69 | 0.00223 | 0        |
| P02750 | 0 | 0.9804 | 877.0761 | 2629.214 | 1.09 | 0.00095 | 3.347218 |
| P02750 | 0 | 1      | 1091.099 | 2181.191 | 1.21 | 0.00132 | 4.848787 |
| P02750 | 0 | 1      | 727.7352 | 2181.191 | 1.29 | 0.00094 | 1.937458 |
| P02750 | 0 | 0.9846 | 546.3091 | 2182.215 | 1.71 | 0.00093 | 7.362779 |
| P02750 | 0 | 0.9474 | 1091.613 | 2182.219 | 3.45 | 0.00377 | 15.58062 |
| P02750 | 0 | 1      | 728.0766 | 2182.215 | 1.94 | 0.00141 | 5.037887 |
| P02750 | 0 | 1      | 680.0424 | 2038.113 | 1.84 | 0.00125 | 6.470344 |
| P02750 | 0 | 0.6852 | 560.3084 | 1119.61  | 2.24 | 0.00125 | 6.07441  |
| P02750 | 0 | 1      | 876.8477 | 2628.529 | 2.72 | 0.00238 | 19.44095 |
| P02750 | 0 | 0.7436 | 441.9309 | 1323.778 | 2.06 | 0.00091 | 8.159548 |
| P02750 | 0 | 0.8293 | 662.3955 | 1323.784 | 6.31 | 0.00418 | 13.92442 |
| P02750 | 0 | 1      | 432.9105 | 1296.717 | 2.28 | 0.00099 | 15.79766 |
| P02750 | 0 | 0.85   | 396.9238 | 1188.757 | 1.27 | 0.0005  | 13.10366 |
| P02750 | 0 | 0.7647 | 662.3932 | 1323.779 | 2.9  | 0.00192 | 4.093449 |
| P02750 | 0 | 0.9318 | 648.8626 | 1296.718 | 3    | 0.00194 | 0        |
| P02750 | 1 | 1      | 532.9887 | 1596.951 | 3.12 | 0.00166 | 24.50469 |
| P02750 | 1 | 0.2963 | 484.9537 | 1452.846 | 1.46 | 0.00071 | 3.553243 |
| P02750 | 0 | 0.8049 | 576.8107 | 1152.614 | 1.9  | 0.00109 | 0        |
| P02750 | 0 | 0.8966 | 628.8677 | 1256.728 | 3.15 | 0.00198 | 3.516373 |
| P02750 | 0 | 1      | 419.5797 | 1256.725 | 0.44 | 0.00019 | 51.74453 |
| P02750 | 1 | 1      | 484.9531 | 1452.845 | 0.2  | 0.0001  | 35.53529 |
| P10909 | 0 | 0.8889 | 455.2685 | 1363.791 | 2.42 | 0.0011  | 10.12831 |
| P10909 | 0 | 0.9412 | 455.2676 | 1363.788 | 0.34 | 0.00015 | 8.700597 |
| P10909 | 0 | 0.9412 | 455.268  | 1363.789 | 1.21 | 0.00055 | 9.94537  |
| P10909 | 0 | 0.91   | 703.4126 | 1405.818 | 2.75 | 0.00193 | 11.692   |
| P10909 | 1 | 0.7727 | 560.0098 | 1678.015 | 2.18 | 0.00122 | 11.35592 |
| P10909 | 0 | 0.9706 | 673.3716 | 2018.1   | 3.75 | 0.00252 | 45.11676 |
| P10909 | 0 | 0.875  | 703.4116 | 1405.816 | 1.27 | 0.00089 | 17.49289 |
| P10909 | 0 | 1      | 504.9937 | 2016.953 | 1.55 | 0.00078 | 21.30131 |
| P10909 | 0 | 1      | 504.9937 | 2016.953 | 1.43 | 0.00072 | 11.56141 |
| P10909 | 0 | 1      | 504.9938 | 2016.953 | 1.61 | 0.00081 | 17.09357 |
| P10909 | 0 | 0.8947 | 513.2715 | 1537.8   | 1.33 | 0.00068 | 3.481364 |
| P10909 | 0 | 0.9881 | 769.403  | 1537.799 | 0.51 | 0.00039 | 3.272267 |
| P10909 | 0 | 0.6939 | 478.252  | 1432.741 | 0.98 | 0.00047 | 31.43902 |
| P10909 | 0 | 0.7541 | 716.8752 | 1432.743 | 2.16 | 0.00155 | 8.44053  |
| P10909 | 0 | 0.7895 | 478.2519 | 1432.741 | 0.72 | 0.00034 | 2.060853 |
| P10909 | 0 | 0.9403 | 631.3608 | 1261.714 | 1.91 | 0.00121 | 38.42494 |
| P10909 | 0 | 1      | 868.1334 | 2602.386 | 1.66 | 0.00144 | 5.16279  |
| P10909 | 0 | 0.8148 | 609.8275 | 1218.648 | 2.45 | 0.00149 | 3.712485 |
| P10909 | 0 | 0.8919 | 703.4115 | 1405.816 | 1.18 | 0.00083 | 5.882872 |
| P10909 | 0 | 0.9123 | 621.8389 | 1242.671 | 5.12 | 0.00318 | 5.045342 |
| P10909 | 0 | 0.697  | 469.2768 | 1405.816 | 1.2  | 0.00056 | 10.34423 |
| P10909 | 0 | 1      | 684.3502 | 2051.036 | 2.04 | 0.0014  | 29.53649 |
| P10909 | 0 | 0.7353 | 682.3986 | 1363.79  | 1.55 | 0.00106 | 10.072   |
| P10909 | 0 | 0.8929 | 684.3504 | 2051.037 | 2.4  | 0.00164 | 0        |
| P10909 | 0 | 0.6111 | 407.2342 | 1219.688 | 1.94 | 0.00079 | 36.75432 |
| P10909 | 1 | 0.8696 | 420.2589 | 1678.014 | 1.63 | 0.00068 | 0        |
| P10909 | 0 | 0.9    | 697.3527 | 1393.698 | 1.62 | 0.00113 | 4.176377 |
| P10909 | 0 | 0.7097 | 682.3987 | 1363.79  | 1.82 | 0.00124 | 5.961411 |
| P10909 | 1 | 0.9    | 530.2855 | 1588.842 | 0.57 | 0.0003  | 9.017067 |



|            |   |        |          |          |       |          |          |
|------------|---|--------|----------|----------|-------|----------|----------|
| P10909     | 0 | 0.9375 | 684.351  | 2051.038 | 3.29  | 0.00225  | 56.44411 |
| P10909     | 0 | 0.6923 | 537.7752 | 1074.543 | 0.52  | 0.00028  | 34.07301 |
| P10909     | 1 | 0.3571 | 447.2828 | 1339.834 | 2.05  | 0.00092  | 32.02862 |
| P10909     | 0 | 0.8864 | 697.3503 | 1393.693 | -1.71 | -0.00119 | 20.84895 |
| P10909     | 0 | 1      | 769.4052 | 1537.803 | 3.37  | 0.00259  | 66.33627 |
| P10909     | 0 | 0.7586 | 769.4052 | 1537.803 | 3.45  | 0.00265  | 8.770552 |
| P10909     | 0 | 0.8824 | 521.2825 | 2602.383 | 0.71  | 0.00037  | 27.60143 |
| P22792     | 1 | 0.8889 | 385.9957 | 1540.961 | 2.92  | 0.00113  | 0        |
| P22792     | 0 | 1      | 649.6686 | 1946.991 | 3.16  | 0.00205  | 20.21987 |
| P22792     | 0 | 1      | 649.6679 | 1946.989 | 2.03  | 0.00132  | 12.15317 |
| P22792     | 0 | 0.8333 | 414.257  | 1240.756 | 2.35  | 0.00097  | 0        |
| P22792     | 0 | 0.931  | 462.2902 | 1384.856 | 0.33  | 0.00015  | 29.22101 |
| P22792     | 0 | 0.9348 | 462.2908 | 1384.858 | 1.72  | 0.0008   | 11.61365 |
| P22792     | 0 | 1      | 896.7375 | 2688.198 | 1.74  | 0.00156  | 1.324496 |
| P22792     | 0 | 1      | 716.7336 | 2148.186 | 4.93  | 0.00353  | 25.80158 |
| P22792     | 0 | 1      | 630.6971 | 1890.077 | 4.32  | 0.00272  | 37.39886 |
| P22792     | 0 | 1      | 860.4635 | 2579.376 | 3.35  | 0.00288  | 9.340974 |
| P22792     | 0 | 1      | 834.232  | 3333.906 | 1.12  | 0.00093  | 5.295148 |
| P22792     | 0 | 0.9302 | 716.8699 | 1432.733 | 1.74  | 0.00124  | 13.93596 |
| P22792     | 0 | 0.6727 | 595.885  | 1190.763 | 2.34  | 0.00139  | 20.07149 |
| P22792     | 0 | 0.7551 | 448.2706 | 1342.797 | 2.97  | 0.00133  | 15.02739 |
| P22792     | 0 | 0.3333 | 567.3383 | 1133.669 | 3.21  | 0.00182  | 7.596039 |
| P22792     | 0 | 0.6765 | 692.9318 | 1384.856 | 0.65  | 0.00045  | 0        |
| P22792     | 0 | 0.9394 | 478.249  | 1432.733 | 1.69  | 0.0008   | 11.58672 |
| P22792     | 0 | 0.375  | 516.8127 | 1032.618 | 1.2   | 0.00062  | 22.07904 |
| P22792     | 0 | 0.2439 | 495.2862 | 989.5652 | 1.65  | 0.00082  | 8.911083 |
| P22792     | 0 | 0.3913 | 671.902  | 1342.797 | 2.55  | 0.00171  | 36.68053 |
| P22792     | 0 | 0.913  | 692.9322 | 1384.857 | 1.18  | 0.00082  | 12.48927 |
| Q2TV78; P2 | 0 | 1      | 536.0283 | 2141.091 | -0.32 | -0.00017 | 41.41212 |
| Q2TV78; P2 | 0 | 0.92   | 429.0256 | 2141.099 | 3.35  | 0.00143  | 21.05733 |
| Q2TV78; P2 | 0 | 1      | 536.0294 | 2141.096 | 1.73  | 0.00092  | 41.93961 |
| P26927     | 0 | 0.9184 | 602.9983 | 1806.98  | 3.98  | 0.0024   | 6.463499 |
| P26927     | 0 | 0.9167 | 477.9177 | 1431.739 | 1.7   | 0.00081  | 28.13566 |
| P26927     | 0 | 1      | 730.708  | 2190.109 | 2.59  | 0.00189  | 26.10289 |
| Q2TV78; P2 | 0 | 1      | 832.9111 | 3328.623 | 2.7   | 0.00225  | 30.29306 |
| P26927     | 0 | 1      | 740.3362 | 2218.994 | -0.1  | -0.00007 | 22.37329 |
| P26927     | 0 | 1      | 740.3339 | 2218.987 | -3.32 | -0.00245 | 23.03736 |
| P26927     | 0 | 0.6949 | 593.0054 | 1777.002 | 3.57  | 0.00211  | 23.43148 |
| Q2TV78; P2 | 0 | 0.8571 | 580.8331 | 1160.659 | 3.83  | 0.00222  | 2.265286 |
| Q2TV78; P2 | 0 | 0.8125 | 580.8327 | 1160.658 | 3.2   | 0.00186  | 2.265191 |
| Q2TV78; P2 | 0 | 0.8148 | 506.6295 | 1517.874 | 1.42  | 0.00072  | 7.35443  |
| P26927     | 0 | 0.6471 | 863.0938 | 2587.267 | 3.11  | 0.00268  | 36.06442 |
| P26927     | 0 | 1      | 448.2235 | 1342.656 | 1.42  | 0.00064  | 31.82818 |
| Q2TV78; P2 | 0 | 1      | 822.382  | 2465.131 | 1.67  | 0.00137  | 3.663897 |
| P26927     | 0 | 0.4839 | 586.8052 | 1172.603 | 2.49  | 0.00146  | 14.9315  |
| P25311     | 0 | 0.825  | 507.9278 | 1521.769 | 2.58  | 0.00131  | 18.61318 |
| P25311     | 0 | 0.6753 | 707.3818 | 1413.756 | 1.77  | 0.00125  | 7.541047 |
| P25311     | 0 | 0.8261 | 643.0243 | 1927.058 | 7.14  | 0.00459  | 17.22633 |
| P25311     | 0 | 0.9875 | 691.0548 | 2071.15  | 1.57  | 0.00108  | 5.381068 |
| P25311     | 0 | 0.88   | 1036.079 | 2071.151 | 2.2   | 0.00227  | 0        |
| P25311     | 0 | 1      | 705.3531 | 1409.699 | 1.13  | 0.00079  | 8.792508 |
| P25311     | 0 | 1      | 532.6008 | 1595.788 | 1.37  | 0.00073  | 11.19711 |

|        |   |        |          |          |      |         |          |
|--------|---|--------|----------|----------|------|---------|----------|
| P25311 | 0 | 1      | 798.3971 | 1595.787 | 0.84 | 0.00067 | 3.516333 |
| P25311 | 0 | 1      | 849.777  | 2547.317 | 2.09 | 0.00178 | 3.683234 |
| P25311 | 0 | 0.8714 | 566.3196 | 1696.944 | 2.58 | 0.00146 | 11.58587 |
| P25311 | 0 | 0.9836 | 516.78   | 2064.098 | 0.81 | 0.00042 | 10.47461 |
| P25311 | 0 | 1      | 688.705  | 2064.101 | 2    | 0.00137 | 9.214712 |
| P25311 | 1 | 0.8837 | 547.6364 | 1640.895 | 1.64 | 0.0009  | 19.81544 |
| P25311 | 0 | 1      | 1274.165 | 2547.323 | 4.64 | 0.00591 | 0        |
| P25311 | 1 | 0.9143 | 547.6362 | 1640.894 | 1.31 | 0.00072 | 17.38868 |
| P25311 | 1 | 1      | 607.6701 | 1820.996 | 3.31 | 0.00201 | 7.223686 |
| P25311 | 0 | 0.8077 | 636.3405 | 1271.674 | 2.02 | 0.00128 | 3.727094 |
| P25311 | 0 | 0.7593 | 636.3393 | 1271.671 | 0.1  | 0.00006 | 3.463441 |
| P25311 | 0 | 0.8727 | 638.821  | 1276.635 | 2.15 | 0.00138 | 0.63061  |
| P25311 | 0 | 1      | 726.3463 | 1451.685 | 1.27 | 0.00092 | 0        |
| P25311 | 0 | 0.8462 | 564.29   | 1127.573 | 3.26 | 0.00184 | 0        |
| P25311 | 0 | 0.7955 | 424.5623 | 1271.672 | 0.88 | 0.00037 | 4.625057 |
| P25311 | 0 | 0.9318 | 608.8281 | 1216.649 | 3.1  | 0.00189 | 7.277424 |
| P25311 | 0 | 0.8571 | 710.8725 | 1420.738 | 2.53 | 0.0018  | 5.626595 |
| P25311 | 0 | 0.9394 | 470.5708 | 1409.698 | 0.45 | 0.00021 | 10.96612 |
| P25311 | 1 | 0.9583 | 607.6694 | 1820.994 | 2.11 | 0.00128 | 3.749967 |
| P25311 | 1 | 1      | 911      | 1820.993 | 1.64 | 0.0015  | 0        |
| P25311 | 0 | 0.9756 | 475.9036 | 1425.696 | 2.87 | 0.00137 | 8.209058 |
| P25311 | 0 | 0.6327 | 635.3309 | 1269.654 | 2.18 | 0.00138 | 6.597437 |
| P25311 | 0 | 1      | 535.7977 | 1070.588 | 0.72 | 0.00038 | 8.109297 |
| P25311 | 0 | 0.7368 | 636.3399 | 1271.673 | 1.06 | 0.00067 | 1.980797 |
| P25311 | 0 | 0.9773 | 535.7981 | 1070.589 | 1.52 | 0.00081 | 14.65717 |
| P25311 | 0 | 1      | 507.9269 | 1521.766 | 0.78 | 0.00039 | 13.00636 |
| P25311 | 0 | 0.925  | 608.8265 | 1216.646 | 0.49 | 0.0003  | 14.90573 |
| P25311 | 0 | 0.9    | 564.2892 | 1127.571 | 1.74 | 0.00098 | 7.343258 |
| P25311 | 0 | 0.8333 | 477.2551 | 1429.751 | 1.5  | 0.00072 | 0        |
| P25311 | 0 | 1      | 713.3513 | 1425.695 | 2.2  | 0.00157 | 6.390464 |
| P25311 | 1 | 0.96   | 456.0031 | 1820.99  | 0.36 | 0.00016 | 62.4319  |
| P25311 | 1 | 0.9032 | 499.6016 | 1496.79  | 0.2  | 0.0001  | 0        |
| P25311 | 0 | 0.9737 | 535.7985 | 1070.59  | 2.2  | 0.00118 | 100      |
| P25311 | 0 | 0.8889 | 518.5425 | 2071.148 | 0.71 | 0.00037 | 3.767303 |
| P25311 | 0 | 0.6296 | 707.3825 | 1413.758 | 2.72 | 0.00193 | 0        |
| P25311 | 0 | 0.8421 | 474.2499 | 1420.735 | 0.74 | 0.00035 | 0        |
| P25311 | 0 | 0.3529 | 470.5714 | 1409.7   | 1.62 | 0.00076 | 64.80545 |
| P25311 | 0 | 1      | 424.5623 | 1271.672 | 0.95 | 0.0004  | 76.60391 |
| P51884 | 0 | 0.9014 | 757.4121 | 1513.817 | 1.83 | 0.00138 | 7.563082 |
| P51884 | 0 | 0.8909 | 505.277  | 1513.817 | 1.66 | 0.00084 | 10.19699 |
| P51884 | 0 | 1      | 652.3176 | 1954.938 | 0.55 | 0.00036 | 2.805971 |
| P51884 | 0 | 1      | 652.3185 | 1954.941 | 2.05 | 0.00134 | 3.931847 |
| P51884 | 0 | 1      | 977.9741 | 1954.941 | 1.94 | 0.00189 | 4.196792 |
| P51884 | 0 | 1      | 652.3185 | 1954.941 | 1.96 | 0.00128 | 4.272217 |
| P51884 | 0 | 1      | 977.9742 | 1954.941 | 2.06 | 0.00201 | 3.943734 |
| P51884 | 0 | 1      | 652.3184 | 1954.941 | 1.77 | 0.00115 | 6.473813 |
| P51884 | 0 | 1      | 652.3188 | 1954.942 | 2.43 | 0.00158 | 0        |
| P51884 | 0 | 0.8772 | 942.1609 | 2824.468 | 2.62 | 0.00247 | 7.86319  |
| P51884 | 0 | 0.7903 | 942.1602 | 2824.466 | 1.91 | 0.0018  | 3.031717 |
| P51884 | 0 | 0.7667 | 633.3909 | 1265.774 | 2.94 | 0.00186 | 6.457979 |
| P51884 | 0 | 0.9091 | 529.2984 | 1585.881 | 1.18 | 0.00062 | 47.50648 |
| P51884 | 1 | 0.8    | 537.655  | 1610.95  | 1.61 | 0.00087 | 31.72026 |

|        |   |        |          |          |       |          |          |
|--------|---|--------|----------|----------|-------|----------|----------|
| P51884 | 1 | 1      | 537.6552 | 1610.951 | 1.95  | 0.00105  | 19.27387 |
| P51884 | 1 | 0.92   | 403.4937 | 1610.953 | 3.35  | 0.00135  | 14.83369 |
| P51884 | 1 | 1      | 537.6551 | 1610.951 | 1.84  | 0.00099  | 18.67451 |
| P51884 | 1 | 0.8333 | 537.6554 | 1610.952 | 2.41  | 0.00129  | 23.79662 |
| P51884 | 0 | 0.8864 | 505.2679 | 1513.789 | 2.72  | 0.00137  | 43.97705 |
| P51884 | 0 | 0.5833 | 438.269  | 1312.792 | 1.75  | 0.00077  | 5.825379 |
| P51884 | 0 | 0.6949 | 512.7836 | 1024.56  | 2.36  | 0.00121  | 5.954332 |
| P51884 | 0 | 0.9057 | 656.9006 | 1312.794 | 2.97  | 0.00195  | 5.803599 |
| P51884 | 0 | 0.5926 | 438.2694 | 1312.794 | 2.73  | 0.00119  | 9.033003 |
| P51884 | 0 | 0.6341 | 438.2698 | 1312.795 | 3.64  | 0.00159  | 7.027594 |
| P51884 | 0 | 0.8764 | 942.1601 | 2824.466 | 1.78  | 0.00168  | 4.770613 |
| P51884 | 0 | 0.6757 | 906.9854 | 1812.963 | 1.21  | 0.0011   | 14.09965 |
| P51884 | 0 | 0.9167 | 604.9939 | 1812.967 | 3.26  | 0.00197  | 6.498007 |
| P51884 | 0 | 0.7241 | 505.2677 | 1513.789 | 2.48  | 0.00125  | 45.06312 |
| P51884 | 0 | 0.8148 | 505.2676 | 1513.788 | 2.24  | 0.00113  | 10.88825 |
| P51884 | 0 | 0.7872 | 505.2674 | 1513.788 | 1.82  | 0.00092  | 7.83718  |
| P51884 | 0 | 0.8667 | 505.2675 | 1513.788 | 1.94  | 0.00098  | 10.3331  |
| P51884 | 0 | 0.8772 | 505.2664 | 1513.785 | -0.24 | -0.00012 | 10.32465 |
| P51884 | 0 | 0.8438 | 757.3976 | 1513.788 | 1.99  | 0.0015   | 63.60633 |
| P51884 | 0 | 1      | 749.1072 | 2245.307 | 1.15  | 0.00086  | 6.281271 |
| P51884 | 0 | 1      | 505.2677 | 1513.789 | 2.48  | 0.00125  | 18.5999  |
| P51884 | 0 | 0.8571 | 505.2673 | 1513.787 | 1.64  | 0.00083  | 8.930131 |
| P51884 | 0 | 1      | 1123.157 | 2245.307 | 0.94  | 0.00105  | 0        |
| P51884 | 0 | 1      | 529.2991 | 1585.883 | 2.56  | 0.00136  | 9.4819   |
| P51884 | 0 | 1      | 529.2989 | 1585.882 | 2.1   | 0.00111  | 7.240224 |
| P51884 | 0 | 1      | 613.3396 | 1225.672 | 4.29  | 0.00263  | 55.86316 |
| P51884 | 0 | 1      | 977.9741 | 1954.941 | 2     | 0.00195  | 2.231015 |
| P51884 | 0 | 0.8919 | 604.9941 | 1812.968 | 3.56  | 0.00215  | 29.75869 |
| P51884 | 0 | 0.9211 | 906.9858 | 1812.964 | 1.75  | 0.00159  | 28.95293 |
| P51884 | 1 | 0.9259 | 403.4923 | 1610.948 | -0.14 | -0.00006 | 0        |
| P51884 | 0 | 0.5938 | 584.835  | 1168.663 | 2.79  | 0.00163  | 0        |
| P51884 | 0 | 0.8421 | 757.399  | 1513.791 | 3.84  | 0.00291  | 0        |
| P51884 | 0 | 0.9412 | 793.4443 | 1585.881 | 1.65  | 0.00131  | 27.8183  |
| P51884 | 0 | 0.8364 | 561.3401 | 1121.673 | 3.77  | 0.00211  | 15.32037 |
| P51884 | 1 | 0.2292 | 489.6211 | 1466.849 | 2.07  | 0.00101  | 59.09682 |
| P51884 | 0 | 0.9    | 422.5966 | 1265.775 | 3.46  | 0.00146  | 6.912282 |
| P51884 | 1 | 0.9167 | 805.9799 | 1610.952 | 2.91  | 0.00234  | 10.30568 |
| P51884 | 1 | 0.9167 | 403.4935 | 1610.952 | 2.74  | 0.0011   | 8.790588 |
| P51884 | 0 | 0.8    | 633.3897 | 1265.772 | 1.11  | 0.0007   | 35.26887 |
| P51884 | 0 | 0.6842 | 757.3984 | 1513.79  | 3.12  | 0.00236  | 6.541358 |
| P51884 | 0 | 0.75   | 422.5967 | 1265.775 | 3.68  | 0.00155  | 26.25572 |
| P51884 | 0 | 0.65   | 505.2669 | 1513.786 | 0.73  | 0.00037  | 0        |
| P51884 | 1 | 0.6875 | 442.2594 | 1324.764 | 2.29  | 0.00101  | 63.33822 |
| P51884 | 0 | 0.8846 | 834.9357 | 1668.864 | 2.94  | 0.00245  | 10.1926  |
| P51884 | 0 | 0.7879 | 584.8356 | 1168.664 | 3.84  | 0.00224  | 20.97486 |
| P51884 | 0 | 1      | 457.2332 | 1369.685 | 1.53  | 0.0007   | 1.778    |
| P51884 | 0 | 0.9375 | 656.9    | 1312.793 | 2.04  | 0.00134  | 11.11731 |
| P51884 | 0 | 1      | 584.8503 | 1168.693 | 4.6   | 0.00269  | 8.064291 |
| P51884 | 0 | 0.5714 | 481.2645 | 1441.779 | 1.47  | 0.00071  | 29.65026 |
| P51884 | 0 | 0.6471 | 502.2816 | 1003.556 | 1.79  | 0.0009   | 3.518802 |
| P51884 | 0 | 0.6    | 706.8721 | 2824.466 | 2.04  | 0.00144  | 23.38015 |
| P51884 | 0 | 1      | 604.9936 | 1812.966 | 2.76  | 0.00167  | 25.9606  |

|            |   |        |          |          |       |          |          |
|------------|---|--------|----------|----------|-------|----------|----------|
| P20742     | 0 | 0.973  | 509.2712 | 1525.799 | 4.4   | 0.00224  | 28.06613 |
| P01023; P2 | 0 | 0.7586 | 624.3599 | 1247.712 | 3.91  | 0.00244  | 0        |
| P01023; P2 | 0 | 1      | 622.3833 | 1865.135 | 3.18  | 0.00198  | 15.8727  |
| P01023; P2 | 0 | 1      | 467.0389 | 1865.134 | 2.22  | 0.00104  | 53.79703 |
| P20742     | 0 | 0.92   | 692.891  | 1384.775 | 3.03  | 0.0021   | 4.056625 |
| P01023; P2 | 0 | 0.6061 | 653.9038 | 1306.8   | 2.34  | 0.00153  | 5.954266 |
| P20742     | 0 | 0.6458 | 705.9096 | 1410.812 | 2.62  | 0.00185  | 48.15599 |
| P01023; P2 | 0 | 0.9899 | 743.0449 | 2227.12  | 2.48  | 0.00184  | 2.667964 |
| P01023; P2 | 0 | 1      | 1114.065 | 2227.122 | 3.53  | 0.00393  | 4.164521 |
| P01023; P2 | 0 | 1      | 1114.064 | 2227.12  | 2.54  | 0.00283  | 0        |
| P01023; P2 | 0 | 1      | 617.0515 | 1849.14  | 2.86  | 0.00177  | 16.97725 |
| P01023; P2 | 0 | 1      | 743.0453 | 2227.121 | 3.06  | 0.00227  | 3.090556 |
| P01023; P2 | 0 | 0.8621 | 463.0398 | 1849.137 | 1.54  | 0.00071  | 11.29244 |
| P20742     | 0 | 0.7959 | 597.8378 | 1194.668 | 6.31  | 0.00377  | 0        |
| P01023; P2 | 0 | 1      | 1095.084 | 2189.16  | 0.65  | 0.00071  | 0        |
| P01023; P2 | 0 | 1      | 730.3897 | 2189.154 | -1.9  | -0.00138 | 15.28631 |
| P01023; P2 | 0 | 1      | 1114.064 | 2227.121 | 2.98  | 0.00332  | 4.288647 |
| P20742     | 0 | 1      | 850.7846 | 2550.339 | 2.77  | 0.00235  | 36.17917 |
| P01023; P2 | 0 | 0.9655 | 464.609  | 1391.812 | 2.04  | 0.00094  | 50.13607 |
| P20742     | 0 | 1      | 509.9017 | 1527.69  | -2.61 | -0.00133 | 17.29596 |
| P01023; P2 | 0 | 0.7105 | 436.2716 | 1306.8   | 2.21  | 0.00096  | 9.604411 |
| P01023; P2 | 0 | 0.6552 | 464.6081 | 1391.81  | 0     | 0        | 36.77136 |
| P20742     | 0 | 0.8542 | 464.6187 | 1391.842 | 4.95  | 0.0023   | 38.44375 |
| P01023; P2 | 0 | 1      | 617.0518 | 1849.141 | 3.36  | 0.00207  | 42.06173 |
| P20742     | 0 | 1      | 487.9373 | 1461.797 | 2.98  | 0.00145  | 0        |
| P01023; P2 | 0 | 0.8    | 464.6089 | 1391.812 | 1.77  | 0.00082  | 10.83583 |
| P20742     | 0 | 0.6222 | 610.3637 | 1219.72  | 5.35  | 0.00326  | 17.69543 |
| P20742     | 0 | 1      | 376.7014 | 1503.784 | 2.87  | 0.00108  | 13.63139 |
| P01023; P2 | 0 | 0.5714 | 464.6095 | 1391.814 | 3.02  | 0.0014   | 67.77657 |
| P01023; P2 | 0 | 0.75   | 436.2735 | 1306.806 | 6.63  | 0.00289  | 20.89936 |
| P20742     | 0 | 0.3    | 567.6388 | 1700.902 | 3.8   | 0.00216  | 18.50627 |
| P20742     | 0 | 1      | 553.2937 | 1657.867 | 5.76  | 0.00318  | 7.596171 |
| P20742     | 0 | 0.8788 | 508.2888 | 1522.852 | 3.32  | 0.00169  | 28.32264 |
| P01023; P2 | 0 | 0.7692 | 653.9042 | 1306.801 | 2.9   | 0.00189  | 44.47319 |
| P20742     | 0 | 0.7692 | 421.2567 | 1261.756 | 3.83  | 0.00161  | 3.963704 |
| P05543     | 0 | 0.9143 | 516.9409 | 1548.808 | 2.14  | 0.0011   | 12.70376 |
| P05543     | 0 | 0.913  | 774.908  | 1548.809 | 2.42  | 0.00188  | 5.665292 |
| P05543     | 0 | 0.8684 | 516.9407 | 1548.808 | 1.78  | 0.00092  | 25.64139 |
| P05543     | 0 | 1      | 1063.881 | 3189.629 | 7.29  | 0.00775  | 0        |
| P05543     | 0 | 0.9861 | 693.3495 | 1385.692 | 0.03  | 0.00002  | 0        |
| P05543     | 0 | 0.9048 | 765.4028 | 1529.798 | 2.97  | 0.00228  | 6.586249 |
| P05543     | 0 | 0.9348 | 510.6041 | 1529.798 | 2.69  | 0.00137  | 13.30512 |
| P05543     | 0 | 0.9559 | 591.2883 | 1771.85  | 3.38  | 0.002    | 8.918624 |
| P05543     | 0 | 0.7778 | 630.0282 | 1888.07  | 1.62  | 0.00102  | 7.909355 |
| P05543     | 0 | 1      | 944.5399 | 1888.072 | 2.89  | 0.00273  | 29.22699 |
| P05543     | 0 | 0.7917 | 674.8987 | 1348.79  | 2.59  | 0.00174  | 12.4781  |
| P05543     | 0 | 0.9412 | 687.4433 | 1373.879 | 2.51  | 0.00173  | 35.87976 |
| P05543     | 0 | 1      | 772.462  | 3086.826 | 3.13  | 0.00241  | 0        |
| P05543     | 0 | 0.6667 | 674.8991 | 1348.791 | 3.13  | 0.00211  | 3.048711 |
| P05543     | 1 | 0.5455 | 460.9299 | 1380.775 | 1.97  | 0.00091  | 10.72439 |
| P05543     | 0 | 1      | 385.5767 | 1154.716 | 1.78  | 0.00069  | 9.842741 |
| P05543     | 0 | 0.34   | 533.3506 | 1065.694 | 2.69  | 0.00143  | 13.70992 |

|        |   |        |          |          |       |          |          |
|--------|---|--------|----------|----------|-------|----------|----------|
| P05543 | 0 | 0.86   | 540.7895 | 1080.572 | 2.18  | 0.00118  | 0        |
| P05543 | 0 | 1      | 413.6158 | 1238.833 | 1.7   | 0.0007   | 16.36514 |
| P05543 | 0 | 0.3571 | 533.3497 | 1065.692 | 0.97  | 0.00052  | 14.33646 |
| P05543 | 0 | 1      | 385.5773 | 1154.717 | 3.29  | 0.00127  | 26.64528 |
| P05543 | 1 | 0.8667 | 527.0734 | 2105.272 | 1.16  | 0.00061  | 51.66877 |
| P05543 | 0 | 1      | 577.8622 | 1154.717 | 3.17  | 0.00183  | 0        |
| Q08380 | 0 | 1      | 1067.845 | 3201.52  | 2.87  | 0.00306  | 5.544907 |
| Q08380 | 1 | 1      | 466.2779 | 1396.819 | 2.91  | 0.00136  | 63.07315 |
| Q08380 | 1 | 0.9756 | 473.9653 | 1419.881 | 2.77  | 0.00131  | 10.32903 |
| Q08380 | 0 | 0.8    | 579.639  | 1736.902 | 5.09  | 0.00295  | 0        |
| Q08380 | 0 | 0.9831 | 868.9533 | 1736.899 | 3.27  | 0.00284  | 31.60339 |
| Q08380 | 0 | 0.6591 | 548.6667 | 1643.986 | 2.02  | 0.00111  | 13.19628 |
| Q08380 | 0 | 1      | 1298.607 | 2596.206 | 0.88  | 0.00114  | 0        |
| Q08380 | 0 | 1      | 866.0728 | 2596.204 | -0.14 | -0.00012 | 4.024243 |
| Q08380 | 0 | 0.8542 | 602.3149 | 1203.622 | 2.21  | 0.00133  | 4.190376 |
| Q08380 | 0 | 1      | 769.38   | 2306.125 | 1.95  | 0.0015   | 35.94759 |
| Q08380 | 0 | 0.8387 | 538.959  | 1614.862 | 2.9   | 0.00156  | 12.00686 |
| Q08380 | 1 | 0.9487 | 698.9114 | 1396.815 | 0.3   | 0.00021  | 2.752107 |
| Q08380 | 0 | 0.6571 | 490.9236 | 1470.756 | 0.44  | 0.00021  | 0        |
| Q08380 | 0 | 0.5556 | 476.7713 | 952.5354 | 2.25  | 0.00107  | 3.449421 |
| Q08380 | 1 | 1      | 473.9648 | 1419.88  | 1.87  | 0.00088  | 50.80263 |
| Q08380 | 0 | 0.7368 | 421.9311 | 1263.779 | 1.91  | 0.00081  | 30.74195 |
| Q08380 | 0 | 0.9091 | 675.8331 | 1350.659 | 2.21  | 0.00149  | 3.435979 |
| Q08380 | 0 | 0.8929 | 801.1342 | 3201.515 | 1.36  | 0.00109  | 3.802016 |
| Q08380 | 0 | 0.6765 | 632.3934 | 1263.78  | 2.67  | 0.00169  | 39.16169 |
| Q08380 | 0 | 1      | 391.8837 | 1173.636 | 1.74  | 0.00068  | 74.52272 |
| Q08380 | 0 | 0.48   | 548.6675 | 1643.988 | 3.47  | 0.0019   | 4.852496 |
| Q08380 | 0 | 0.7812 | 562.8145 | 1124.622 | 3.2   | 0.0018   | 0        |
| Q16610 | 0 | 1      | 727.6828 | 2181.034 | 1.59  | 0.00115  | 1.635897 |
| Q16610 | 0 | 1      | 580.9659 | 1740.883 | 4.42  | 0.00256  | 23.02398 |
| Q16610 | 0 | 0.963  | 630.7045 | 1890.099 | 2.64  | 0.00166  | 29.43839 |
| Q16610 | 0 | 1      | 1021.471 | 3062.399 | 2.07  | 0.00212  | 0        |
| Q16610 | 0 | 1      | 473.2304 | 1417.676 | 4.74  | 0.00224  | 68.70176 |
| Q16610 | 0 | 0.9839 | 725.387  | 1449.767 | 1.8   | 0.0013   | 8.155114 |
| Q16610 | 1 | 1      | 432.5599 | 1295.665 | 2.92  | 0.00126  | 24.70135 |
| Q16610 | 1 | 0.8333 | 432.5595 | 1295.664 | 2.14  | 0.00092  | 0        |
| Q16610 | 0 | 1      | 535.962  | 1605.871 | 1.72  | 0.00092  | 40.23181 |
| Q16610 | 0 | 0.7377 | 702.8589 | 1404.711 | 2.38  | 0.00167  | 29.03466 |
| Q16610 | 0 | 0.54   | 633.336  | 1265.665 | 2.48  | 0.00157  | 22.74282 |
| Q16610 | 0 | 1      | 727.682  | 2181.031 | 0.41  | 0.0003   | 15.68935 |
| Q16610 | 0 | 0.9655 | 630.7049 | 1890.1   | 3.32  | 0.00209  | 26.08136 |
| Q16610 | 0 | 0.9062 | 671.4158 | 1341.824 | 1.53  | 0.00103  | 22.6251  |
| Q16610 | 0 | 1      | 422.2026 | 1264.593 | 1.81  | 0.00076  | 0        |
| Q16610 | 0 | 1      | 632.8302 | 1264.653 | 4.35  | 0.00275  | 64.93069 |
| Q16610 | 0 | 1      | 422.2018 | 1264.591 | 0     | 0        | 5.274674 |
| Q16610 | 0 | 0.4545 | 580.3445 | 1159.682 | 1.2   | 0.00069  | 0        |
| Q16610 | 0 | 1      | 468.9082 | 1404.71  | 2     | 0.00094  | 47.07476 |
| Q16610 | 0 | 0.8947 | 483.9256 | 1449.762 | -1.18 | -0.00057 | 37.13136 |
| Q16610 | 0 | 1      | 580.9645 | 1740.879 | 2.1   | 0.00122  | 25.82335 |
| P08519 | 0 | 0.9111 | 532.6395 | 1595.904 | 0.3   | 0.00016  | 7.990748 |
| P08519 | 0 | 1      | 730.6848 | 2190.04  | -0.33 | -0.00024 | 17.81482 |
| P08519 | 1 | 1      | 559.9907 | 1677.958 | 1.15  | 0.00064  | 21.83714 |

|        |   |        |          |          |       |          |          |
|--------|---|--------|----------|----------|-------|----------|----------|
| P08519 | 0 | 0.9138 | 620.7087 | 1860.112 | 1.73  | 0.00107  | 1.917884 |
| P08519 | 0 | 0.9785 | 930.5585 | 1860.11  | 0.66  | 0.00061  | 28.1674  |
| P08519 | 0 | 0.9737 | 734.6746 | 2202.009 | 2.09  | 0.00153  | 12.73291 |
| P08519 | 0 | 0.5789 | 593.8146 | 1186.622 | 2.9   | 0.00172  | 0        |
| P08519 | 0 | 0.8548 | 593.8138 | 1186.62  | 1.67  | 0.00099  | 3.077636 |
| P08519 | 0 | 1      | 734.6737 | 2202.007 | 0.92  | 0.00068  | 25.90333 |
| P08519 | 0 | 1      | 547.9332 | 1641.785 | 2.31  | 0.00126  | 34.38179 |
| P08519 | 0 | 0.9574 | 585.8164 | 1170.625 | 1.62  | 0.00095  | 11.01561 |
| P08519 | 0 | 0.8056 | 426.2254 | 1276.662 | 2.2   | 0.00093  | 20.12176 |
| P08519 | 0 | 0.881  | 593.8134 | 1186.62  | 0.95  | 0.00056  | 5.617805 |
| P08519 | 0 | 0.7857 | 593.8134 | 1186.619 | 0.85  | 0.0005   | 0        |
| P08519 | 0 | 1      | 545.2564 | 1633.755 | 2.3   | 0.00125  | 45.62024 |
| P08519 | 0 | 1      | 702.6686 | 2105.991 | 0.33  | 0.00023  | 34.01252 |
| P08519 | 0 | 1      | 770.3529 | 2309.044 | -0.24 | -0.00018 | 0        |
| P08519 | 0 | 0.9024 | 521.7627 | 1042.518 | 1.68  | 0.00088  | 46.44989 |
| P08519 | 0 | 1      | 658.3561 | 2630.402 | 0.25  | 0.00016  | 7.382204 |
| P08519 | 0 | 0.7647 | 561.8162 | 1122.625 | 1.48  | 0.00083  | 6.989403 |
| P08519 | 0 | 0.6923 | 396.2115 | 1186.62  | 1.32  | 0.00052  | 54.46737 |
| P04217 | 0 | 0.875  | 411.568  | 1232.689 | 2.15  | 0.00088  | 51.60205 |
| P04217 | 0 | 1      | 467.7718 | 1868.065 | 1.63  | 0.00076  | 45.34072 |
| P04217 | 0 | 0.9714 | 623.3612 | 1868.069 | 3.54  | 0.0022   | 8.988138 |
| P04217 | 0 | 1      | 467.7721 | 1868.067 | 2.35  | 0.0011   | 33.64283 |
| P04217 | 0 | 1      | 506.272  | 1516.801 | 1.72  | 0.00087  | 7.296523 |
| P04217 | 0 | 0.9831 | 506.2717 | 1516.801 | 1.17  | 0.00059  | 4.769586 |
| P04217 | 0 | 0.9828 | 758.9043 | 1516.801 | 1.63  | 0.00123  | 3.517689 |
| P04217 | 0 | 1      | 506.2716 | 1516.8   | 0.81  | 0.00041  | 9.545256 |
| P04217 | 0 | 0.9677 | 686.853  | 1372.699 | 1.45  | 0.001    | 0        |
| P04217 | 0 | 0.9811 | 506.272  | 1516.801 | 1.66  | 0.00084  | 0        |
| P04217 | 0 | 0.9434 | 758.9042 | 1516.801 | 1.47  | 0.00111  | 0        |
| P04217 | 0 | 0.9831 | 506.2718 | 1516.801 | 1.36  | 0.00069  | 10.26194 |
| P04217 | 0 | 0.9744 | 506.2721 | 1516.802 | 1.9   | 0.00096  | 15.74285 |
| P04217 | 0 | 0.9434 | 686.8526 | 1372.698 | 0.83  | 0.00057  | 0        |
| P04217 | 0 | 1      | 506.2718 | 1516.801 | 1.36  | 0.00069  | 44.69265 |
| P04217 | 0 | 1      | 506.2724 | 1516.803 | 2.5   | 0.00127  | 3.744611 |
| P04217 | 0 | 0.9302 | 506.2718 | 1516.801 | 1.36  | 0.00069  | 8.640786 |
| P04217 | 0 | 0.9474 | 506.2732 | 1516.805 | 4.13  | 0.00209  | 56.73125 |
| P04217 | 0 | 1      | 467.772  | 1868.066 | 2.03  | 0.00095  | 18.26283 |
| P04217 | 0 | 0.9429 | 623.3602 | 1868.066 | 2.07  | 0.00129  | 8.748311 |
| P04217 | 0 | 1      | 467.7719 | 1868.066 | 1.9   | 0.00089  | 9.963365 |
| P04217 | 0 | 1      | 458.238  | 1372.699 | 1.82  | 0.00083  | 35.99899 |
| P04217 | 0 | 1      | 686.8525 | 1372.698 | 0.74  | 0.00051  | 14.64235 |
| P04217 | 0 | 1      | 467.7715 | 1868.064 | 0.98  | 0.00046  | 14.2805  |
| P04217 | 0 | 0.8696 | 616.8488 | 1232.69  | 2.8   | 0.00173  | 3.360213 |
| P04217 | 0 | 0.7826 | 616.8475 | 1232.688 | 0.82  | 0.00051  | 3.298528 |
| P04217 | 0 | 0.7455 | 411.5677 | 1232.689 | 1.48  | 0.00061  | 0        |
| P04217 | 0 | 0.7586 | 411.5678 | 1232.689 | 1.77  | 0.00073  | 5.301482 |
| P04217 | 0 | 0.7    | 518.2913 | 1552.859 | 1.23  | 0.00064  | 17.84344 |
| P04217 | 0 | 1      | 467.7719 | 1868.066 | 1.83  | 0.00085  | 0        |
| P04217 | 0 | 1      | 467.7715 | 1868.064 | 0.92  | 0.00043  | 4.719209 |
| P04217 | 0 | 1      | 623.3604 | 1868.067 | 2.36  | 0.00147  | 4.141427 |
| P04217 | 0 | 1      | 467.7713 | 1868.063 | 0.52  | 0.00024  | 4.65883  |
| P04217 | 0 | 1      | 467.7719 | 1868.066 | 1.9   | 0.00089  | 12.77589 |

|        |   |        |          |          |       |          |          |
|--------|---|--------|----------|----------|-------|----------|----------|
| P04217 | 0 | 1      | 467.7724 | 1868.068 | 2.94  | 0.00137  | 2.159503 |
| P04217 | 0 | 0.9688 | 623.3607 | 1868.067 | 2.75  | 0.00171  | 8.596077 |
| P04217 | 0 | 0.9333 | 623.3605 | 1868.067 | 2.56  | 0.00159  | 6.593993 |
| P04217 | 0 | 1      | 467.7719 | 1868.066 | 1.83  | 0.00085  | 6.86235  |
| P04217 | 0 | 1      | 467.7716 | 1868.065 | 1.31  | 0.00061  | 5.234429 |
| P04217 | 0 | 1      | 623.3613 | 1868.069 | 3.73  | 0.00232  | 8.452997 |
| P04217 | 0 | 1      | 467.7716 | 1868.064 | 1.11  | 0.00052  | 2.00179  |
| P04217 | 0 | 0.9394 | 623.3605 | 1868.067 | 2.56  | 0.00159  | 6.611272 |
| P04217 | 0 | 1      | 467.7713 | 1868.063 | 0.59  | 0.00027  | 2.607297 |
| P04217 | 0 | 1      | 467.7718 | 1868.065 | 1.7   | 0.00079  | 16.70205 |
| P04217 | 0 | 1      | 1308.156 | 2615.304 | 1.54  | 0.00202  | 0        |
| P04217 | 0 | 1      | 872.4393 | 2615.303 | 1.35  | 0.00118  | 1.901769 |
| P04217 | 0 | 1      | 506.2719 | 1516.801 | 1.42  | 0.00072  | 6.498134 |
| P04217 | 0 | 0.9868 | 544.797  | 1088.587 | 1.84  | 0.001    | 1.619553 |
| P04217 | 0 | 0.8969 | 776.9332 | 1552.859 | 1.12  | 0.00087  | 6.606741 |
| P04217 | 0 | 0.75   | 518.2919 | 1552.861 | 2.41  | 0.00125  | 9.461235 |
| P04217 | 0 | 0.8286 | 518.2914 | 1552.86  | 1.58  | 0.00082  | 12.2374  |
| P04217 | 0 | 0.7963 | 579.8725 | 1158.738 | 3.54  | 0.00205  | 46.9997  |
| P04217 | 0 | 0.7321 | 579.8728 | 1158.738 | 4.06  | 0.00235  | 8.94821  |
| P04217 | 0 | 0.75   | 579.8725 | 1158.738 | 3.54  | 0.00205  | 12.87578 |
| P04217 | 0 | 0.7581 | 579.8705 | 1158.734 | 0.17  | 0.0001   | 6.367818 |
| P04217 | 0 | 1      | 467.7718 | 1868.065 | 1.63  | 0.00076  | 5.550165 |
| P04217 | 0 | 1      | 623.361  | 1868.069 | 3.34  | 0.00208  | 3.685359 |
| P04217 | 0 | 1      | 467.7717 | 1868.065 | 1.37  | 0.00064  | 3.915395 |
| P04217 | 0 | 1      | 467.7716 | 1868.065 | 1.31  | 0.00061  | 5.165389 |
| P04217 | 0 | 0.9667 | 623.3604 | 1868.067 | 2.36  | 0.00147  | 2.388265 |
| P04217 | 0 | 1      | 467.7721 | 1868.067 | 2.35  | 0.0011   | 2.139393 |
| P04217 | 0 | 0.973  | 623.3609 | 1868.068 | 3.14  | 0.00196  | 6.439563 |
| P04217 | 0 | 1      | 467.7719 | 1868.066 | 1.76  | 0.00082  | 5.371679 |
| P04217 | 0 | 1      | 467.7716 | 1868.065 | 1.31  | 0.00061  | 4.100005 |
| P04217 | 0 | 1      | 467.7725 | 1868.068 | 3.07  | 0.00143  | 9.717034 |
| P04217 | 0 | 1      | 895.4683 | 1789.929 | 0.99  | 0.00088  | 0        |
| P04217 | 0 | 0.9592 | 597.3156 | 1789.932 | 2.68  | 0.0016   | 3.467098 |
| P04217 | 0 | 1      | 814.0983 | 2440.28  | -2.02 | -0.00164 | 62.97336 |
| P04217 | 0 | 0.9524 | 766.0663 | 2296.184 | 0.44  | 0.00034  | 0        |
| P04217 | 0 | 0.988  | 814.1005 | 2440.287 | 0.68  | 0.00056  | 2.23003  |
| P04217 | 0 | 0.9792 | 610.8279 | 2440.29  | 1.78  | 0.00109  | 1.612768 |
| P04217 | 0 | 0.9508 | 814.1014 | 2440.29  | 1.81  | 0.00147  | 2.35806  |
| P04217 | 0 | 0.9623 | 610.8284 | 2440.292 | 2.68  | 0.00163  | 10.53614 |
| P04217 | 0 | 1      | 1010.557 | 2020.107 | 2.4   | 0.00243  | 0        |
| P04217 | 0 | 1      | 674.04   | 2020.105 | 1.79  | 0.00121  | 31.06759 |
| P04217 | 0 | 1      | 674.0401 | 2020.106 | 1.97  | 0.00133  | 2.034718 |
| P04217 | 0 | 1      | 813.7937 | 2439.367 | -1.91 | -0.00156 | 38.38825 |
| P04217 | 0 | 1      | 491.5285 | 1963.092 | 3.55  | 0.00174  | 26.65485 |
| P04217 | 0 | 1      | 1220.192 | 2439.376 | 1.97  | 0.0024   | 0        |
| P04217 | 0 | 1      | 610.6006 | 2439.381 | 3.81  | 0.00232  | 6.4293   |
| P04217 | 0 | 1      | 764.7199 | 2292.145 | -0.62 | -0.00047 | 1.997291 |
| P04217 | 0 | 1      | 573.7936 | 2292.153 | 2.75  | 0.00158  | 10.47242 |
| P04217 | 0 | 1      | 573.7927 | 2292.149 | 1.05  | 0.0006   | 17.36331 |
| P04217 | 0 | 1      | 819.1279 | 2455.369 | 1.19  | 0.00097  | 32.55411 |
| P04217 | 0 | 1      | 764.7217 | 2292.151 | 1.86  | 0.00142  | 3.448748 |
| P04217 | 0 | 1      | 573.7933 | 2292.151 | 2.12  | 0.00121  | 5.824782 |

|        |   |        |          |          |       |          |          |
|--------|---|--------|----------|----------|-------|----------|----------|
| P04217 | 0 | 1      | 610.829  | 2440.294 | 3.58  | 0.00218  | 28.4765  |
| P04217 | 0 | 1      | 506.2703 | 1516.796 | -1.72 | -0.00087 | 43.00293 |
| P04217 | 0 | 0.9688 | 506.2728 | 1516.804 | 3.29  | 0.00166  | 20.46011 |
| P04217 | 0 | 1      | 458.2378 | 1372.699 | 1.55  | 0.00071  | 25.10944 |
| P04217 | 0 | 1      | 814.1011 | 2440.289 | 1.36  | 0.00111  | 18.35939 |
| P04217 | 0 | 0.9643 | 623.3609 | 1868.068 | 3.14  | 0.00196  | 10.4663  |
| P04217 | 0 | 1      | 467.772  | 1868.066 | 2.09  | 0.00098  | 37.14836 |
| P04217 | 0 | 1      | 623.3622 | 1868.072 | 5.3   | 0.0033   | 12.96531 |
| P04217 | 0 | 1      | 467.7719 | 1868.066 | 1.83  | 0.00085  | 37.82217 |
| P04217 | 0 | 0.8889 | 507.8203 | 1014.633 | 1.76  | 0.0009   | 25.31805 |
| P04217 | 0 | 1      | 674.0389 | 2020.102 | 0.25  | 0.00017  | 46.2002  |
| P04217 | 0 | 0.8367 | 386.9171 | 1158.737 | 2.73  | 0.00106  | 10.41233 |
| P04217 | 0 | 0.7442 | 616.8486 | 1232.69  | 2.5   | 0.00154  | 3.25241  |
| P04217 | 0 | 0.9796 | 544.7964 | 1088.586 | 0.72  | 0.00039  | 41.96601 |
| P04217 | 0 | 0.5263 | 616.8487 | 1232.69  | 2.7   | 0.00166  | 9.019933 |
| P04217 | 0 | 0.6667 | 386.9166 | 1158.735 | 1.47  | 0.00057  | 0        |
| P04217 | 0 | 0.9355 | 431.7461 | 1723.963 | 1.35  | 0.00058  | 0        |
| P04217 | 1 | 1      | 548.3064 | 1642.905 | 1.38  | 0.00076  | 34.05788 |
| P04217 | 0 | 1      | 506.2724 | 1516.803 | 2.44  | 0.00123  | 63.71977 |
| P04217 | 0 | 0.7843 | 579.8704 | 1158.733 | -0.15 | -0.00009 | 14.09051 |
| P04217 | 0 | 1      | 814.1014 | 2440.29  | 1.81  | 0.00147  | 10.27606 |
| P04217 | 0 | 0.6667 | 616.8485 | 1232.69  | 2.4   | 0.00148  | 0        |
| P04217 | 0 | 0.8367 | 507.8211 | 1014.635 | 3.33  | 0.00169  | 18.4179  |
| P04217 | 0 | 0.6471 | 616.8481 | 1232.689 | 1.71  | 0.00105  | 0        |
| P04217 | 0 | 0.8    | 493.7586 | 986.5099 | 1.11  | 0.00055  | 24.85661 |
| P04217 | 0 | 0.6923 | 467.7741 | 1868.075 | 6.67  | 0.00311  | 10.58773 |
| P04217 | 0 | 0.75   | 507.8202 | 1014.633 | 1.52  | 0.00077  | 3.468971 |
| P04217 | 0 | 0.4583 | 518.291  | 1552.858 | 0.76  | 0.00039  | 9.006186 |
| P04217 | 0 | 1      | 506.2736 | 1516.806 | 4.92  | 0.00249  | 17.67278 |
| P04217 | 0 | 0.9259 | 431.7462 | 1723.963 | 1.64  | 0.00071  | 12.52052 |
| P04217 | 0 | 1      | 537.767  | 2148.046 | 0.9   | 0.00048  | 45.72462 |
| P04217 | 0 | 0.8163 | 507.8203 | 1014.633 | 1.76  | 0.0009   | 2.283457 |
| P04217 | 0 | 0.913  | 431.7465 | 1723.964 | 2.27  | 0.00098  | 0        |
| P04217 | 0 | 1      | 579.8723 | 1158.737 | 3.11  | 0.0018   | 47.93823 |
| P04217 | 0 | 0.5926 | 518.2913 | 1552.859 | 1.35  | 0.0007   | 8.909708 |
| P04217 | 0 | 0.9231 | 579.8705 | 1158.734 | 0.17  | 0.0001   | 0        |
| P04217 | 1 | 0.0833 | 395.5761 | 1184.714 | 1.48  | 0.00058  | 4.865179 |
| P04217 | 0 | 1      | 758.9039 | 1516.801 | 1.14  | 0.00087  | 0        |
| P04217 | 0 | 0.375  | 616.8486 | 1232.69  | 2.6   | 0.0016   | 9.254614 |
| P04217 | 0 | 0.8125 | 575.3259 | 1723.963 | 1.75  | 0.00101  | 34.10489 |
| P04217 | 0 | 1      | 575.3259 | 1723.963 | 1.75  | 0.00101  | 23.29911 |
| P04217 | 0 | 0.5217 | 616.8486 | 1232.69  | 2.5   | 0.00154  | 3.731008 |
| P04217 | 0 | 0.1538 | 616.8466 | 1232.686 | -0.67 | -0.00041 | 0        |
| P04217 | 0 | 1      | 431.7459 | 1723.962 | 0.79  | 0.00034  | 0        |
| P04217 | 0 | 1      | 758.9043 | 1516.801 | 1.63  | 0.00123  | 0        |
| P04217 | 0 | 0.8333 | 507.8211 | 1014.635 | 3.33  | 0.00169  | 50.32187 |
| P02749 | 0 | 1      | 891.1047 | 2671.3   | 1.66  | 0.00148  | 3.980671 |
| P02749 | 0 | 1      | 668.5813 | 2671.303 | 3.05  | 0.00204  | 0        |
| P02749 | 0 | 1      | 891.1041 | 2671.298 | 0.98  | 0.00087  | 5.805277 |
| P02749 | 0 | 1      | 891.1046 | 2671.299 | 1.53  | 0.00136  | 5.273335 |
| P02749 | 0 | 1      | 668.5804 | 2671.3   | 1.68  | 0.00112  | 4.773991 |
| P02749 | 1 | 1      | 480.2802 | 1438.826 | 0.32  | 0.00015  | 22.63111 |



|        |   |        |          |          |       |         |          |
|--------|---|--------|----------|----------|-------|---------|----------|
| P02749 | 0 | 0.9615 | 464.9218 | 1392.751 | -0.43 | -0.0002 | 16.24735 |
| P02749 | 0 | 0.8095 | 587.3342 | 2346.315 | 1.93  | 0.00113 | 14.52776 |
| P02749 | 0 | 0.8125 | 782.7773 | 2346.317 | 2.98  | 0.00233 | 15.41712 |
| P02749 | 0 | 0.7931 | 587.3356 | 2346.321 | 4.43  | 0.0026  | 16.3359  |
| P02749 | 0 | 0.8837 | 583.8195 | 1166.632 | 2.61  | 0.00152 | 5.339758 |
| P02749 | 0 | 0.9375 | 464.9224 | 1392.753 | 0.88  | 0.00041 | 0        |
| P02749 | 0 | 0.9688 | 464.9227 | 1392.754 | 1.54  | 0.00072 | 7.969976 |
| P02749 | 0 | 0.8889 | 696.8809 | 1392.754 | 2.19  | 0.00152 | 6.979035 |
| P02749 | 0 | 0.9737 | 464.9227 | 1392.754 | 1.54  | 0.00072 | 7.401026 |
| P02749 | 0 | 1      | 464.9224 | 1392.753 | 0.88  | 0.00041 | 32.51595 |
| P02749 | 0 | 0.9355 | 587.3335 | 2346.312 | 0.79  | 0.00046 | 6.186659 |
| P02749 | 0 | 0.9787 | 782.7758 | 2346.313 | 1.11  | 0.00087 | 5.84372  |
| P02749 | 0 | 0.1579 | 551.3085 | 2202.212 | 1.73  | 0.00095 | 3.880956 |
| P02749 | 0 | 0.2162 | 734.7422 | 2202.212 | 1.71  | 0.00126 | 4.253729 |
| P02749 | 0 | 0.6098 | 734.7432 | 2202.215 | 3.13  | 0.00229 | 14.44538 |
| P02749 | 0 | 0.6098 | 734.7432 | 2202.215 | 3.13  | 0.00229 | 14.44538 |
| P02749 | 0 | 0.9318 | 782.7761 | 2346.314 | 1.42  | 0.00111 | 5.722111 |
| P02749 | 0 | 0.931  | 587.3338 | 2346.313 | 1.31  | 0.00077 | 5.993733 |
| P02749 | 0 | 0.9535 | 782.7763 | 2346.314 | 1.73  | 0.00135 | 5.95391  |
| P02749 | 1 | 0.9444 | 662.335  | 2646.318 | 2.55  | 0.00169 | 6.928754 |
| P02749 | 1 | 0.9592 | 882.777  | 2646.317 | 1.91  | 0.00169 | 10.25423 |
| P02749 | 1 | 0.9643 | 882.7767 | 2646.316 | 1.57  | 0.00138 | 42.73511 |
| P02749 | 0 | 1      | 844.0391 | 2530.103 | 1.8   | 0.00152 | 2.19392  |
| P02749 | 1 | 0.7059 | 662.3345 | 2646.316 | 1.72  | 0.00114 | 19.73788 |
| P02749 | 0 | 1      | 892.0722 | 2674.202 | 0.65  | 0.00058 | 0        |
| P02749 | 0 | 1      | 669.3066 | 2674.205 | 1.65  | 0.0011  | 4.001714 |
| P02749 | 1 | 0.8246 | 480.2808 | 1438.828 | 1.53  | 0.00073 | 100      |
| P02749 | 0 | 1      | 892.0731 | 2674.205 | 1.67  | 0.00149 | 4.326416 |
| P02749 | 0 | 1      | 892.0731 | 2674.205 | 1.61  | 0.00143 | 4.996123 |
| P02749 | 0 | 1      | 892.0729 | 2674.204 | 1.4   | 0.00125 | 3.725558 |
| P02749 | 0 | 1      | 669.3063 | 2674.204 | 1.19  | 0.0008  | 4.054362 |
| P02749 | 0 | 1      | 892.0721 | 2674.202 | 0.51  | 0.00046 | 3.885424 |
| P02749 | 0 | 1      | 892.0722 | 2674.202 | 0.65  | 0.00058 | 9.727498 |
| P02749 | 0 | 1      | 669.3073 | 2674.207 | 2.56  | 0.00171 | 3.607074 |
| P02749 | 0 | 1      | 669.307  | 2674.206 | 2.1   | 0.00141 | 5.63969  |
| P02749 | 0 | 1      | 892.0731 | 2674.205 | 1.67  | 0.00149 | 4.319246 |
| P02749 | 0 | 1      | 669.3068 | 2674.205 | 1.83  | 0.00122 | 3.584359 |
| P02749 | 0 | 1      | 892.0734 | 2674.206 | 1.95  | 0.00174 | 3.166668 |
| P02749 | 0 | 1      | 792.0443 | 2374.118 | 1.57  | 0.00124 | 5.913152 |
| P02749 | 0 | 1      | 792.0446 | 2374.119 | 2.03  | 0.00161 | 6.049882 |
| P02749 | 1 | 0.9077 | 730.4313 | 2189.279 | 1.64  | 0.0012  | 18.72259 |
| P02749 | 0 | 1      | 891.1045 | 2671.299 | 1.39  | 0.00124 | 7.4634   |
| P02749 | 1 | 0.9762 | 584.1017 | 2333.385 | 2.99  | 0.00175 | 7.213567 |
| P02749 | 1 | 1      | 778.4655 | 2333.382 | 1.74  | 0.00136 | 9.083534 |
| P02749 | 1 | 0.9077 | 730.4313 | 2189.279 | 1.64  | 0.0012  | 18.72259 |
| P02749 | 1 | 1      | 584.1013 | 2333.383 | 2.36  | 0.00138 | 4.830279 |
| P02749 | 1 | 1      | 778.4654 | 2333.382 | 1.59  | 0.00123 | 6.518513 |
| P02749 | 0 | 1      | 640.8245 | 1280.642 | 1.71  | 0.00109 | 9.349539 |
| P02749 | 0 | 1      | 741.6476 | 2963.569 | 1.48  | 0.0011  | 2.115092 |
| P02749 | 0 | 1      | 988.5264 | 2963.565 | 0.07  | 0.00007 | 1.032423 |
| P02749 | 0 | 1      | 940.4924 | 2819.463 | 0.16  | 0.00015 | 8.293025 |
| P02749 | 0 | 1      | 1482.288 | 2963.568 | 1.2   | 0.00178 | 0        |

|        |   |        |          |          |      |          |          |
|--------|---|--------|----------|----------|------|----------|----------|
| P02749 | 0 | 0.8611 | 511.7676 | 1022.528 | 1.37 | 0.0007   | 1.549752 |
| P02749 | 1 | 0.7895 | 662.3356 | 2646.321 | 3.48 | 0.0023   | 0        |
| P02749 | 0 | 1      | 843.0699 | 2527.195 | 0.77 | 0.00065  | 2.389004 |
| P02749 | 0 | 1      | 959.0449 | 1917.083 | 1.95 | 0.00186  | 18.49173 |
| P02749 | 0 | 1      | 891.1047 | 2671.3   | 1.66 | 0.00148  | 4.132637 |
| P02749 | 0 | 1      | 668.5806 | 2671.3   | 1.95 | 0.00131  | 1.577475 |
| P02749 | 0 | 1      | 669.3067 | 2674.205 | 1.74 | 0.00116  | 8.412983 |
| P02749 | 0 | 1      | 892.0733 | 2674.205 | 1.88 | 0.00168  | 3.761561 |
| P02749 | 1 | 1      | 719.9166 | 1438.826 | 0.24 | 0.00018  | 0        |
| P02749 | 0 | 0.087  | 734.7422 | 2202.212 | 1.71 | 0.00126  | 32.23905 |
| P02749 | 0 | 1      | 669.3067 | 2674.205 | 1.74 | 0.00116  | 32.63737 |
| P02749 | 0 | 0.9048 | 782.7769 | 2346.316 | 2.43 | 0.0019   | 25.57878 |
| P02749 | 0 | 1      | 892.0737 | 2674.207 | 2.36 | 0.0021   | 0        |
| P02749 | 0 | 1      | 392.5419 | 1175.611 | 2.59 | 0.00102  | 14.53529 |
| P02749 | 0 | 0.7714 | 583.819  | 1166.631 | 1.77 | 0.00103  | 0        |
| P02749 | 0 | 0.8919 | 583.8201 | 1166.633 | 3.65 | 0.00213  | 0        |
| P02749 | 0 | 1      | 568.7734 | 1136.54  | 1.93 | 0.0011   | 8.640901 |
| P02749 | 0 | 0.8235 | 568.7736 | 1136.54  | 2.26 | 0.00128  | 3.052112 |
| P02749 | 1 | 0.9474 | 493.7679 | 1972.05  | 1.06 | 0.00052  | 6.489329 |
| P02749 | 0 | 0.3158 | 470.0682 | 2346.312 | 0.56 | 0.00026  | 9.968227 |
| P02749 | 0 | 0.6087 | 734.7422 | 2202.212 | 1.71 | 0.00126  | 24.60968 |
| P02749 | 0 | 0.7895 | 782.7753 | 2346.311 | 0.41 | 0.00032  | 38.91525 |
| P02749 | 0 | 1      | 427.5524 | 1280.643 | 2.48 | 0.00106  | 2.404241 |
| P02749 | 0 | 0.8611 | 583.8181 | 1166.629 | 0.31 | 0.00018  | 3.05824  |
| P02749 | 0 | 1      | 427.552  | 1280.641 | 1.55 | 0.00066  | 6.83111  |
| P02749 | 0 | 0.7895 | 583.8198 | 1166.632 | 3.13 | 0.00183  | 3.420103 |
| P02749 | 0 | 0.1579 | 551.3083 | 2202.211 | 1.4  | 0.00077  | 14.06844 |
| P02749 | 0 | 0.1579 | 551.3083 | 2202.211 | 1.4  | 0.00077  | 14.06844 |
| P02749 | 0 | 1      | 513.5963 | 1538.774 | 2.88 | 0.00148  | 40.76123 |
| P02749 | 0 | 1      | 427.5526 | 1280.643 | 2.84 | 0.00121  | 16.75869 |
| P02749 | 0 | 1      | 669.3059 | 2674.202 | 0.55 | 0.00037  | 0        |
| P02749 | 0 | 1      | 387.2096 | 1159.614 | 0.82 | 0.00032  | 42.21714 |
| P02749 | 0 | 1      | 427.5517 | 1280.641 | 0.84 | 0.00036  | 14.1054  |
| P02749 | 0 | 1      | 640.825  | 1280.643 | 2.47 | 0.00158  | 3.114318 |
| P02749 | 0 | 0.7714 | 389.5492 | 1166.633 | 3.88 | 0.00151  | 0        |
| P02749 | 0 | 1      | 427.5523 | 1280.642 | 2.2  | 0.00094  | 50.21577 |
| P02749 | 0 | 0.7857 | 734.741  | 2202.209 | 0.13 | 0.0001   | 9.436034 |
| P02749 | 0 | 0.7857 | 734.741  | 2202.209 | 0.13 | 0.0001   | 9.436034 |
| P02749 | 0 | 1      | 464.9237 | 1392.756 | 3.65 | 0.00169  | 25.5619  |
| P02749 | 0 | 1      | 511.7676 | 1022.528 | 1.43 | 0.00073  | 7.928835 |
| P02749 | 1 | 0.5    | 730.4331 | 2189.285 | 4.07 | 0.00297  | 18.84471 |
| P02749 | 1 | 0.5    | 730.4331 | 2189.285 | 4.07 | 0.00297  | 18.84471 |
| P02749 | 0 | 1      | 511.7679 | 1022.529 | 1.97 | 0.00101  | 5.537322 |
| P02749 | 0 | 0.7333 | 734.7416 | 2202.21  | 0.88 | 0.00065  | 13.83534 |
| P02749 | 0 | 0.7333 | 734.7416 | 2202.21  | 0.88 | 0.00065  | 13.83534 |
| P02749 | 0 | 0.7222 | 782.778  | 2346.319 | 3.84 | 0.003    | 4.200603 |
| P02749 | 0 | 1      | 389.5484 | 1166.631 | 1.68 | 0.00065  | 35.17702 |
| P02749 | 0 | 0.6471 | 734.7415 | 2202.21  | 0.71 | 0.00052  | 10.88852 |
| P02749 | 0 | 0.6471 | 734.7415 | 2202.21  | 0.71 | 0.00052  | 10.88852 |
| P02749 | 0 | 1      | 892.0754 | 2674.212 | 4.21 | 0.00375  | 6.960771 |
| P02749 | 0 | 0.25   | 587.3348 | 2346.318 | 3.08 | 0.00181  | 4.048322 |
| P04004 | 0 | 1      | 604.2967 | 1810.876 | -1.1 | -0.00066 | 20.63791 |

|        |   |        |          |          |       |          |          |
|--------|---|--------|----------|----------|-------|----------|----------|
| P04004 | 0 | 1      | 604.299  | 1810.882 | 2.64  | 0.0016   | 0        |
| P04004 | 0 | 1      | 604.299  | 1810.882 | 2.74  | 0.00166  | 2.972012 |
| P04004 | 0 | 0.973  | 905.944  | 1810.881 | 1.74  | 0.00158  | 3.939086 |
| P04004 | 0 | 1      | 604.2977 | 1810.879 | 0.62  | 0.00037  | 4.435607 |
| P04004 | 0 | 0.9753 | 905.9446 | 1810.882 | 2.41  | 0.00219  | 3.19997  |
| P04004 | 0 | 1      | 604.2982 | 1810.88  | 1.43  | 0.00086  | 5.236632 |
| P04004 | 0 | 1      | 453.4752 | 1810.879 | 0.85  | 0.00038  | 27.35274 |
| P04004 | 0 | 0.8125 | 549.9863 | 1647.944 | 4.35  | 0.00239  | 8.535947 |
| P04004 | 0 | 1      | 604.2985 | 1810.881 | 1.93  | 0.00117  | 7.679681 |
| P04004 | 0 | 0.3684 | 392.5773 | 1175.717 | 2.87  | 0.00112  | 57.71684 |
| P04004 | 0 | 1      | 783.8836 | 1566.76  | 2.74  | 0.00214  | 45.8703  |
| P04004 | 0 | 1      | 783.8834 | 1566.76  | 2.5   | 0.00196  | 19.79913 |
| P04004 | 0 | 1      | 609.6303 | 1826.876 | 2.16  | 0.00132  | 9.352267 |
| P04004 | 0 | 1      | 604.3001 | 1810.886 | 4.46  | 0.00269  | 0        |
| P04004 | 0 | 0.3889 | 392.5769 | 1175.716 | 2.01  | 0.00079  | 25.27228 |
| P04004 | 0 | 0.7895 | 448.7658 | 1792.041 | 1.03  | 0.00046  | 43.70597 |
| P04004 | 0 | 0.9529 | 823.9132 | 1646.819 | 1.04  | 0.00086  | 1.53857  |
| P04004 | 0 | 0.9412 | 783.8828 | 1566.758 | 1.65  | 0.00129  | 4.879219 |
| P04004 | 0 | 0.9831 | 522.9245 | 1566.759 | 2.1   | 0.0011   | 7.884763 |
| P04004 | 0 | 0.9828 | 783.8831 | 1566.759 | 2.03  | 0.00159  | 5.261366 |
| P04004 | 0 | 0.9429 | 522.9243 | 1566.758 | 1.75  | 0.00092  | 4.753265 |
| P04004 | 0 | 0.9828 | 783.8816 | 1566.756 | 0.16  | 0.00013  | 3.355197 |
| P04004 | 0 | 1      | 522.9238 | 1566.757 | 0.7   | 0.00037  | 4.358677 |
| P04004 | 0 | 1      | 907.4637 | 1813.92  | 1.38  | 0.00125  | 3.616855 |
| P04004 | 0 | 0.9551 | 711.8318 | 1422.656 | 1.91  | 0.00136  | 0        |
| P04004 | 0 | 0.9863 | 711.8311 | 1422.655 | 0.96  | 0.00068  | 0        |
| P04004 | 0 | 1      | 679.3377 | 1357.668 | 1.57  | 0.00106  | 5.780124 |
| P04004 | 0 | 0.9474 | 531.5894 | 1592.754 | 1.91  | 0.00101  | 9.137148 |
| P04004 | 1 | 0.8333 | 486.9327 | 1458.784 | 1.05  | 0.00051  | 10.16653 |
| P04004 | 1 | 0.7368 | 486.9327 | 1458.784 | 0.98  | 0.00048  | 5.622293 |
| P04004 | 0 | 1      | 679.3378 | 1357.668 | 1.75  | 0.00119  | 11.18523 |
| P04004 | 1 | 0.7059 | 486.9326 | 1458.783 | 0.8   | 0.00039  | 5.069892 |
| P04004 | 1 | 0.6053 | 486.9325 | 1458.783 | 0.54  | 0.00026  | 4.561823 |
| P04004 | 1 | 0.9706 | 531.6266 | 1592.865 | 1.69  | 0.0009   | 7.233706 |
| P04004 | 0 | 1      | 960.1405 | 2878.407 | 1.24  | 0.00119  | 7.251732 |
| P04004 | 0 | 1      | 556.2645 | 1666.779 | 2.15  | 0.00119  | 0.168595 |
| P04004 | 0 | 1      | 716.3583 | 2862.412 | 1.07  | 0.00076  | 8.136818 |
| P04004 | 0 | 1      | 954.8101 | 2862.416 | 2.5   | 0.00238  | 7.33891  |
| P04004 | 1 | 0.9231 | 486.9319 | 1458.781 | -0.65 | -0.00032 | 0        |
| P04004 | 0 | 0.9474 | 876.3946 | 2627.169 | 4.08  | 0.00357  | 0        |
| P04004 | 1 | 0.7619 | 486.9322 | 1458.782 | -0.08 | -0.00004 | 0        |
| P04004 | 0 | 0.9487 | 531.589  | 1592.752 | 1.22  | 0.00065  | 14.80103 |
| P04004 | 0 | 1      | 943.3971 | 3770.567 | 2.75  | 0.0026   | 2.132069 |
| P04004 | 1 | 1      | 483.592  | 1448.762 | 0.77  | 0.00037  | 27.39853 |
| P04004 | 0 | 1      | 605.3118 | 1813.921 | 1.84  | 0.00112  | 18.4481  |
| P04004 | 0 | 0.9535 | 453.2278 | 1357.669 | 2.05  | 0.00093  | 8.854127 |
| P04004 | 0 | 0.8286 | 651.8458 | 1302.684 | 2.57  | 0.00167  | 4.076452 |
| P04004 | 1 | 0.775  | 438.8991 | 1314.683 | 1.91  | 0.00084  | 10.13515 |
| P04004 | 0 | 0.55   | 392.5771 | 1175.717 | 2.32  | 0.00091  | 13.28334 |
| P04004 | 0 | 1      | 453.4764 | 1810.884 | 3.34  | 0.00151  | 36.4066  |
| P04004 | 0 | 1      | 556.2633 | 1666.775 | -0.05 | -0.00003 | 7.184883 |
| P04004 | 0 | 0.5    | 597.6469 | 1790.926 | 3.81  | 0.00227  | 7.779567 |

|            |   |        |          |          |       |          |          |
|------------|---|--------|----------|----------|-------|----------|----------|
| P04004     | 1 | 1      | 408.2212 | 1629.863 | 0.01  | 0        | 13.36487 |
| P04004     | 0 | 0.9    | 556.2651 | 1666.781 | 3.24  | 0.0018   | 59.78996 |
| P04004     | 0 | 0.9474 | 651.8458 | 1302.684 | 2.48  | 0.00161  | 7.478293 |
| P04004     | 1 | 0.875  | 438.8992 | 1314.683 | 2.19  | 0.00096  | 11.41148 |
| P04004     | 0 | 0.9375 | 522.9243 | 1566.758 | 1.64  | 0.00085  | 10.10336 |
| P04004     | 0 | 0.9688 | 783.8824 | 1566.757 | 1.18  | 0.00092  | 4.338346 |
| P04004     | 0 | 0.9804 | 607.2875 | 1213.568 | 3.17  | 0.00192  | 0        |
| P04004     | 0 | 0.8857 | 895.9642 | 1790.921 | 1.02  | 0.00092  | 6.269338 |
| P04004     | 0 | 0.9697 | 783.8831 | 1566.759 | 2.03  | 0.00159  | 0        |
| P04004     | 0 | 1      | 561.5977 | 1682.778 | 4.78  | 0.00268  | 25.54196 |
| P04004     | 1 | 0.5294 | 486.9334 | 1458.786 | 2.36  | 0.00115  | 9.338683 |
| P04004     | 0 | 0.9737 | 531.5862 | 1592.744 | -4.07 | -0.00216 | 0        |
| P04004     | 1 | 0.8485 | 438.8989 | 1314.682 | 1.56  | 0.00069  | 13.23536 |
| P04004     | 0 | 0.9394 | 605.3111 | 1813.919 | 0.63  | 0.00038  | 7.073317 |
| P04004     | 0 | 0.9474 | 598.0199 | 1792.045 | 3.25  | 0.00194  | 36.62289 |
| P04004     | 1 | 0.8696 | 438.8988 | 1314.682 | 1.36  | 0.00059  | 33.45156 |
| P04004     | 0 | 0.7368 | 796.8785 | 1592.75  | -0.42 | -0.00033 | 22.40794 |
| P04004     | 0 | 1      | 448.7665 | 1792.044 | 2.73  | 0.00122  | 57.48979 |
| P04004     | 0 | 1      | 833.8924 | 1666.778 | 1.24  | 0.00103  | 2.185148 |
| P04004     | 0 | 0.8421 | 895.9638 | 1790.92  | 0.48  | 0.00043  | 29.18975 |
| P04004     | 0 | 1      | 392.5768 | 1175.716 | 1.7   | 0.00067  | 33.43949 |
| P04220; P0 | 0 | 1      | 465.2515 | 1393.74  | 1.57  | 0.00073  | 32.03212 |
| P04220; P0 | 0 | 0.9273 | 697.3748 | 1393.742 | 3.16  | 0.0022   | 16.76457 |
| P04220; P0 | 0 | 1      | 640.0442 | 1918.118 | 1.93  | 0.00123  | 5.983711 |
| P04220; P0 | 0 | 1      | 480.2844 | 1918.116 | 0.81  | 0.00039  | 4.934416 |
| P04220; P0 | 0 | 1      | 480.2846 | 1918.117 | 1.19  | 0.00057  | 26.15992 |
| P04220; P0 | 0 | 1      | 625.3226 | 1249.638 | 1.78  | 0.00111  | 5.815742 |
| P01871     | 0 | 1      | 559.0185 | 1675.041 | 0.77  | 0.00043  | 7.077498 |
| P01871     | 0 | 0.9706 | 559.019  | 1675.043 | 1.75  | 0.00098  | 35.56913 |
| P04220; P0 | 0 | 0.8333 | 502.0225 | 2005.068 | 0.74  | 0.00037  | 33.76444 |
| P04220; P0 | 0 | 0.9848 | 669.0283 | 2005.07  | 1.78  | 0.00119  | 7.875226 |
| P01871     | 0 | 0.8649 | 522.6434 | 1565.916 | 0.93  | 0.00049  | 20.74918 |
| P01871     | 0 | 1      | 602.6325 | 1805.883 | 3.63  | 0.00218  | 8.371262 |
| P01871     | 0 | 0.8152 | 636.0099 | 1906.015 | 1.64  | 0.00104  | 7.662244 |
| P01871     | 0 | 0.8361 | 953.512  | 1906.017 | 2.51  | 0.0024   | 6.028083 |
| P01871     | 0 | 1      | 607.9641 | 1821.878 | 3.54  | 0.00215  | 0        |
| P01871     | 0 | 0.9833 | 602.6322 | 1805.882 | 3.12  | 0.00188  | 5.250598 |
| P04220; P0 | 0 | 1      | 963.5733 | 1926.139 | 2.63  | 0.00253  | 9.84608  |
| P04220; P0 | 0 | 1      | 582.2993 | 1744.883 | 1.35  | 0.00078  | 2.909007 |
| P04220; P0 | 0 | 0.5556 | 585.8173 | 1170.627 | 2.38  | 0.00139  | 7.087362 |
| P04220; P0 | 0 | 1      | 575.8695 | 1150.732 | 2.78  | 0.0016   | 5.647379 |
| P04220; P0 | 0 | 1      | 500.2838 | 999.5604 | 1.23  | 0.00061  | 0        |
| P04220; P0 | 0 | 0.9333 | 381.8922 | 1143.662 | 0.87  | 0.00033  | 23.20232 |
| P01871     | 0 | 0.8824 | 452.2239 | 1805.874 | -1.52 | -0.00068 | 69.11008 |
| P04220; P0 | 0 | 0.5424 | 585.8171 | 1170.627 | 2.17  | 0.00127  | 20.0987  |
| P01871     | 0 | 0.6944 | 522.6445 | 1565.919 | 3.04  | 0.00158  | 18.59729 |
| P04220; P0 | 0 | 0.8333 | 642.7177 | 1926.138 | 2.15  | 0.00138  | 8.946026 |
| P01871     | 0 | 0.9118 | 838.0234 | 1675.039 | -0.1  | -0.00008 | 3.986452 |
| P04220; P0 | 0 | 0.8947 | 450.7702 | 900.5332 | 3.36  | 0.00151  | 18.34709 |
| P04220; P0 | 0 | 1      | 582.3002 | 1744.886 | 3.02  | 0.00176  | 0        |
| P01871     | 0 | 0.8148 | 559.019  | 1675.043 | 1.75  | 0.00098  | 2.936554 |
| P01871     | 0 | 0.6207 | 522.6447 | 1565.919 | 3.39  | 0.00177  | 6.791483 |

|            |   |        |          |          |       |          |          |
|------------|---|--------|----------|----------|-------|----------|----------|
| P04220; PO | 0 | 1      | 575.8695 | 1150.732 | 2.68  | 0.00154  | 7.036704 |
| P04220; PO | 0 | 0.9333 | 669.0283 | 2005.07  | 1.87  | 0.00125  | 0        |
| P04220; PO | 0 | 1      | 502.0216 | 2005.064 | -1.09 | -0.00055 | 0        |
| P04220; PO | 0 | 0.6286 | 522.8208 | 1044.634 | 2.01  | 0.00105  | 27.21322 |
| P04220; PO | 0 | 1      | 500.2843 | 999.5613 | 2.15  | 0.00107  | 0        |
| P04220; PO | 0 | 1      | 640.0452 | 1918.121 | 3.46  | 0.00221  | 0        |
| P01871     | 0 | 0.7143 | 838.0233 | 1675.039 | -0.17 | -0.00014 | 5.722323 |
| P04220; PO | 0 | 0.9474 | 669.031  | 2005.078 | 5.89  | 0.00394  | 70.9072  |
| P01871     | 0 | 0.8148 | 838.0248 | 1675.042 | 1.58  | 0.00132  | 4.8058   |
| P04220; PO | 0 | 1      | 572.3357 | 1143.664 | 2.56  | 0.00146  | 23.70536 |
| P01871     | 0 | 1      | 394.5599 | 1181.665 | 1.83  | 0.00072  | 57.79884 |
| P04220; PO | 0 | 0.8214 | 522.8209 | 1044.634 | 2.13  | 0.00111  | 0        |
| P04220; PO | 0 | 0.9688 | 384.2483 | 1150.73  | 1.47  | 0.00056  | 5.071266 |
| P01871     | 1 | 0.8333 | 740.7289 | 2220.172 | 0.49  | 0.00036  | 0        |
| P01871     | 1 | 0.8333 | 740.7289 | 2220.172 | 0.49  | 0.00036  | 0        |
| P04220; PO | 0 | 1      | 575.8692 | 1150.731 | 2.25  | 0.0013   | 0        |
| P01871     | 0 | 0.2353 | 636.0113 | 1906.019 | 3.85  | 0.00245  | 13.51828 |
| P04220; PO | 0 | 0.84   | 522.8204 | 1044.634 | 1.31  | 0.00068  | 53.48961 |
| P04220; PO | 0 | 1      | 572.3355 | 1143.664 | 2.13  | 0.00122  | 0        |
| P04220; PO | 0 | 0.8276 | 522.8203 | 1044.633 | 0.96  | 0.0005   | 23.53466 |
| P04220; PO | 0 | 0.7273 | 522.8204 | 1044.633 | 1.19  | 0.00062  | 6.409844 |
| P07358     | 1 | 1      | 563.9639 | 1689.877 | 3.18  | 0.00179  | 10.43833 |
| P07358     | 1 | 1      | 563.9641 | 1689.878 | 3.61  | 0.00203  | 26.54396 |
| P07358     | 0 | 1      | 582.8198 | 1164.632 | 2.76  | 0.00161  | 10.924   |
| P07358     | 0 | 1      | 792.3518 | 2375.041 | 1.68  | 0.00133  | 40.51714 |
| P07358     | 0 | 1      | 792.3524 | 2375.043 | 2.38  | 0.00188  | 49.36799 |
| P07358     | 0 | 0.9804 | 673.0809 | 2689.302 | 2.15  | 0.00144  | 3.30985  |
| P07358     | 0 | 1      | 897.1053 | 2689.301 | 2.02  | 0.00181  | 4.317266 |
| P07358     | 0 | 1      | 1055.542 | 4219.147 | 4.9   | 0.00516  | 0        |
| P07358     | 1 | 1      | 563.9641 | 1689.878 | 3.5   | 0.00197  | 30.51527 |
| P07358     | 0 | 1      | 1203.125 | 2405.243 | 3.24  | 0.00389  | 71.62    |
| P07358     | 0 | 0.9867 | 756.3926 | 3022.548 | 0.36  | 0.00027  | 5.500639 |
| P07358     | 0 | 1      | 734.8221 | 1468.637 | 1.46  | 0.00107  | 3.550969 |
| P07358     | 0 | 1      | 734.8221 | 1468.637 | 1.46  | 0.00107  | 5.861677 |
| P07358     | 0 | 1      | 734.8222 | 1468.637 | 1.54  | 0.00113  | 5.611843 |
| P07358     | 0 | 1      | 767.3903 | 1533.773 | 1.74  | 0.00134  | 1.78136  |
| P07358     | 0 | 0.9512 | 511.9285 | 1533.771 | 0.18  | 0.00009  | 0        |
| P07358     | 0 | 1      | 582.8201 | 1164.633 | 3.29  | 0.00191  | 26.98871 |
| P07358     | 0 | 0.6552 | 450.5805 | 1349.727 | -2.56 | -0.00115 | 30.12641 |
| P07358     | 0 | 0.9286 | 527.6187 | 1580.842 | 2.56  | 0.00135  | 19.22535 |
| P07358     | 0 | 0.9583 | 527.6179 | 1580.839 | 0.94  | 0.00049  | 36.62271 |
| P07358     | 0 | 1      | 490.2177 | 1468.638 | 2.47  | 0.00121  | 0        |
| P07358     | 0 | 0.3415 | 537.8425 | 1074.678 | 1.45  | 0.00078  | 38.65061 |
| P07358     | 0 | 0.3721 | 537.843  | 1074.679 | 2.35  | 0.00127  | 23.17795 |
| P07358     | 1 | 1      | 563.9636 | 1689.876 | 2.74  | 0.00154  | 13.86621 |
| P07358     | 0 | 1      | 588.3222 | 1762.952 | 3.68  | 0.00216  | 0        |
| P07358     | 0 | 1      | 582.8203 | 1164.633 | 3.49  | 0.00204  | 9.41748  |
| P07358     | 0 | 1      | 543.7983 | 2172.171 | 2.4   | 0.0013   | 46.16141 |
| P07358     | 0 | 1      | 476.8879 | 1428.649 | 0.74  | 0.00035  | 69.17966 |
| P07358     | 1 | 0.7917 | 435.6021 | 1304.792 | 1.45  | 0.00063  | 15.58764 |
| P07358     | 0 | 0.4615 | 673.0811 | 2689.302 | 2.42  | 0.00163  | 0        |
| P07358     | 0 | 0.7586 | 767.3903 | 1533.773 | 1.74  | 0.00134  | 0        |

|        |   |        |          |          |       |          |          |
|--------|---|--------|----------|----------|-------|----------|----------|
| P07358 | 0 | 1      | 532.9471 | 1596.827 | -3.61 | -0.00192 | 31.03259 |
| P07358 | 1 | 1      | 435.602  | 1304.792 | 1.31  | 0.00057  | 33.86082 |
| P07358 | 0 | 0.6    | 388.8821 | 1164.632 | 2.17  | 0.00084  | 4.267658 |
| P04196 | 0 | 0.8667 | 545.6033 | 1634.795 | 1.44  | 0.00078  | 1.871024 |
| P04196 | 0 | 0.9221 | 705.0385 | 2113.101 | 3.07  | 0.00216  | 8.378069 |
| P04196 | 0 | 0.9643 | 1057.054 | 2113.102 | 3.45  | 0.00365  | 0        |
| P04196 | 0 | 1      | 392.629  | 1959.116 | 1.25  | 0.00049  | 50.52021 |
| P04196 | 0 | 1      | 913.9526 | 1826.898 | 2.81  | 0.00256  | 3.03904  |
| P04196 | 0 | 1      | 913.9532 | 1826.899 | 3.41  | 0.00311  | 0        |
| P04196 | 0 | 1      | 490.5347 | 1959.117 | 1.72  | 0.00084  | 10.04774 |
| P04196 | 0 | 0.1667 | 454.5088 | 1815.013 | 0.92  | 0.00042  | 15.18119 |
| P04196 | 0 | 1      | 841.9001 | 1682.793 | 1.24  | 0.00104  | 0.884863 |
| P04196 | 0 | 1      | 609.6363 | 1826.894 | 0.79  | 0.00048  | 4.865746 |
| P04196 | 0 | 1      | 913.9499 | 1826.893 | -0.2  | -0.00018 | 3.49339  |
| P04196 | 0 | 0.9467 | 529.0302 | 2113.099 | 2.11  | 0.00112  | 1.517609 |
| P04196 | 0 | 0.9464 | 1057.053 | 2113.099 | 2.07  | 0.00218  | 0        |
| P04196 | 0 | 0.8961 | 705.0366 | 2113.095 | 0.47  | 0.00033  | 4.539976 |
| P04196 | 0 | 0.991  | 985.0024 | 1968.997 | 2.66  | 0.00262  | 4.738513 |
| P04196 | 0 | 0.8    | 657.0036 | 1968.996 | 2.03  | 0.00133  | 2.401388 |
| P04196 | 0 | 1      | 392.6297 | 1959.119 | 2.88  | 0.00113  | 36.28401 |
| P04196 | 0 | 1      | 525.6365 | 1574.895 | 1.52  | 0.0008   | 29.59    |
| P04196 | 0 | 0.9512 | 705.0418 | 2113.111 | 7.84  | 0.00552  | 14.25234 |
| P04196 | 0 | 1      | 426.5501 | 1277.636 | 2.19  | 0.00093  | 5.333055 |
| P04196 | 0 | 1      | 426.5497 | 1277.635 | 1.34  | 0.00057  | 0        |
| P04196 | 1 | 1      | 603.6291 | 1808.873 | 1.87  | 0.00113  | 9.541204 |
| P04196 | 1 | 1      | 603.6289 | 1808.872 | 1.56  | 0.00094  | 10.07456 |
| P04196 | 1 | 1      | 697.4015 | 2786.584 | 4.44  | 0.00309  | 10.0829  |
| P04196 | 1 | 0.9661 | 558.1213 | 2786.578 | 2.09  | 0.00117  | 13.27547 |
| P04196 | 1 | 0.8824 | 558.1215 | 2786.578 | 2.31  | 0.00129  | 22.68667 |
| P04196 | 1 | 0.9697 | 558.1208 | 2786.575 | 1.11  | 0.00062  | 7.354231 |
| P04196 | 1 | 1      | 697.4008 | 2786.581 | 3.48  | 0.00242  | 6.285002 |
| P04196 | 1 | 1      | 618.9623 | 1854.872 | 2.25  | 0.00139  | 10.96086 |
| P04196 | 0 | 0.9623 | 418.2108 | 1252.618 | 2.18  | 0.00091  | 20.29903 |
| P04196 | 1 | 1      | 618.9624 | 1854.873 | 2.35  | 0.00145  | 8.439034 |
| P04196 | 1 | 1      | 618.9627 | 1854.874 | 2.84  | 0.00176  | 10.27925 |
| P04196 | 0 | 1      | 716.0405 | 2146.107 | 1.62  | 0.00116  | 16.35294 |
| P04196 | 0 | 0.9412 | 629.3509 | 2514.382 | 2.79  | 0.00175  | 5.761184 |
| P04196 | 0 | 1      | 791.8404 | 1582.674 | 1.42  | 0.00112  | 4.009649 |
| P04196 | 1 | 1      | 603.6299 | 1808.875 | 3.18  | 0.00192  | 11.6588  |
| P04196 | 0 | 1      | 418.2102 | 1252.616 | 0.79  | 0.00033  | 10.56521 |
| P04196 | 0 | 1      | 418.2101 | 1252.616 | 0.64  | 0.00027  | 10.00089 |
| P04196 | 0 | 0.8846 | 477.6031 | 1430.795 | 2.88  | 0.00137  | 8.389368 |
| P04196 | 0 | 0.9583 | 525.6362 | 1574.894 | 0.94  | 0.00049  | 50.52448 |
| P04196 | 0 | 0.9615 | 525.6367 | 1574.896 | 1.87  | 0.00098  | 22.44906 |
| P04196 | 0 | 1      | 394.4794 | 1574.896 | 1.98  | 0.00078  | 14.03827 |
| P04196 | 0 | 1      | 696.1163 | 2781.443 | 2.83  | 0.00197  | 4.827563 |
| P04196 | 0 | 1      | 557.0947 | 2781.445 | 3.28  | 0.00183  | 8.066754 |
| P04196 | 0 | 0.9167 | 696.1167 | 2781.445 | 3.44  | 0.00239  | 14.55443 |
| P04196 | 1 | 1      | 475.6103 | 1424.816 | 2.36  | 0.00112  | 19.41712 |
| P04196 | 0 | 0.8    | 557.095  | 2781.446 | 3.72  | 0.00207  | 24.08427 |
| P04196 | 0 | 1      | 426.55   | 1277.635 | 1.84  | 0.00078  | 0        |
| P04196 | 0 | 1      | 927.8198 | 2781.445 | 3.42  | 0.00318  | 8.309294 |

|        |   |        |          |          |       |          |          |
|--------|---|--------|----------|----------|-------|----------|----------|
| P04196 | 0 | 0.8519 | 537.282  | 2146.106 | 1.38  | 0.00074  | 3.63231  |
| P04196 | 0 | 1      | 525.6371 | 1574.897 | 2.57  | 0.00135  | 14.92081 |
| P04196 | 0 | 1      | 525.6362 | 1574.894 | 0.94  | 0.00049  | 31.06642 |
| P04196 | 1 | 1      | 464.4731 | 1854.871 | 1.19  | 0.00055  | 13.52289 |
| P04196 | 0 | 0.9286 | 716.0397 | 2146.105 | 0.59  | 0.00042  | 0        |
| P04196 | 0 | 1      | 426.5501 | 1277.636 | 2.12  | 0.0009   | 24.67882 |
| P04196 | 0 | 0.4091 | 537.8424 | 1074.678 | 1.33  | 0.00072  | 12.1311  |
| P04196 | 0 | 0.3333 | 537.8425 | 1074.678 | 1.45  | 0.00078  | 14.6035  |
| P04196 | 0 | 1      | 528.2296 | 1582.674 | 1.91  | 0.00101  | 26.85953 |
| P04196 | 0 | 1      | 528.2306 | 1582.677 | 3.76  | 0.00198  | 23.80724 |
| P04196 | 0 | 0.7333 | 545.6041 | 1634.798 | 2.89  | 0.00158  | 11.83561 |
| P04196 | 0 | 1      | 426.55   | 1277.635 | 1.84  | 0.00078  | 21.7995  |
| P04196 | 0 | 1      | 554.7606 | 1108.514 | 0.86  | 0.00048  | 3.110776 |
| P04196 | 0 | 0.26   | 537.8429 | 1074.679 | 2.24  | 0.0012   | 6.959748 |
| P04196 | 0 | 1      | 426.55   | 1277.635 | 1.84  | 0.00078  | 27.40044 |
| P04196 | 1 | 0.9688 | 464.4735 | 1854.872 | 2.18  | 0.00101  | 8.650406 |
| P04196 | 0 | 0      | 537.8431 | 1074.679 | 2.7   | 0.00145  | 46.21024 |
| P04196 | 0 | 0.3846 | 537.8422 | 1074.677 | 0.88  | 0.00047  | 6.377517 |
| P04196 | 0 | 0.7674 | 567.2709 | 1133.534 | 3.14  | 0.00178  | 0        |
| P04196 | 0 | 1      | 554.7615 | 1108.516 | 2.51  | 0.00139  | 8.653824 |
| P04196 | 0 | 0.875  | 838.7961 | 2514.374 | -0.34 | -0.00028 | 0        |
| P04196 | 0 | 0.9524 | 639.3216 | 1277.636 | 2.3   | 0.00147  | 0        |
| P04196 | 0 | 0.8    | 545.6027 | 1634.794 | 0.32  | 0.00017  | 29.51368 |
| P04196 | 0 | 0.9268 | 527.7933 | 1054.579 | 2.94  | 0.00155  | 30.509   |
| P04196 | 0 | 0.9375 | 455.7412 | 910.4751 | 1.08  | 0.00049  | 48.12349 |
| P04196 | 0 | 0.3191 | 537.8429 | 1074.679 | 2.24  | 0.0012   | 6.041926 |
| P04196 | 1 | 1      | 904.9398 | 1808.872 | 1.6   | 0.00145  | 3.63531  |
| P04196 | 0 | 1      | 817.8975 | 1634.788 | -3.26 | -0.00266 | 0        |
| P04196 | 0 | 0.7895 | 567.272  | 1133.537 | 5.19  | 0.00294  | 7.07225  |
| P04196 | 0 | 0.3125 | 537.8433 | 1074.679 | 2.92  | 0.00157  | 11.55303 |
| P04196 | 0 | 1      | 817.9004 | 1634.794 | 0.25  | 0.0002   | 21.16752 |
| P04196 | 1 | 0.8261 | 618.9627 | 1854.873 | 2.75  | 0.0017   | 10.69883 |
| P04196 | 0 | 0.6129 | 626.8115 | 1252.616 | 0.56  | 0.00035  | 0        |
| P04196 | 0 | 0.129  | 537.8434 | 1074.679 | 3.15  | 0.00169  | 35.42142 |
| P04196 | 0 | 0.6562 | 527.7925 | 1054.578 | 1.55  | 0.00082  | 16.80746 |
| P36955 | 0 | 0.7636 | 697.8879 | 1394.769 | 2.76  | 0.00192  | 9.999237 |
| P36955 | 0 | 0.95   | 448.6222 | 1343.852 | 1.54  | 0.00069  | 15.83408 |
| P36955 | 0 | 0.9714 | 672.4302 | 1343.853 | 2.34  | 0.00157  | 32.44493 |
| P36955 | 0 | 1      | 448.6223 | 1343.852 | 1.67  | 0.00075  | 11.10554 |
| P36955 | 0 | 0.9506 | 836.4478 | 1671.888 | 3.01  | 0.00252  | 15.31006 |
| P36955 | 0 | 1      | 557.9673 | 1671.887 | 2.45  | 0.00137  | 10.5872  |
| P36955 | 0 | 0.9333 | 557.9671 | 1671.887 | 2.13  | 0.00118  | 5.558527 |
| P36955 | 0 | 1      | 748.7327 | 2244.184 | 2.04  | 0.00153  | 43.38021 |
| P36955 | 0 | 0.9032 | 764.3956 | 1527.784 | 1.78  | 0.00136  | 19.39532 |
| P36955 | 0 | 0.9667 | 769.9386 | 1538.87  | 2.02  | 0.00155  | 14.48951 |
| P36955 | 0 | 0.9362 | 513.6278 | 1538.869 | 1.21  | 0.00062  | 7.95679  |
| P36955 | 0 | 1      | 561.8021 | 2244.186 | 3.29  | 0.00184  | 2.098896 |
| P36955 | 0 | 1      | 748.7325 | 2244.183 | 1.72  | 0.00128  | 4.604881 |
| P36955 | 0 | 1      | 748.7336 | 2244.186 | 3.18  | 0.00238  | 18.07862 |
| P36955 | 0 | 0.9722 | 554.2668 | 1660.786 | 2.13  | 0.00118  | 2.629496 |
| P36955 | 0 | 1      | 830.8962 | 1660.785 | 1.77  | 0.00147  | 2.861014 |
| P36955 | 0 | 1      | 830.896  | 1660.785 | 1.48  | 0.00123  | 0        |

|        |   |        |          |          |       |          |          |
|--------|---|--------|----------|----------|-------|----------|----------|
| P36955 | 0 | 0.871  | 657.3644 | 1313.721 | 1.82  | 0.0012   | 20.75306 |
| P36955 | 0 | 1      | 568.6357 | 1703.892 | 3.03  | 0.00172  | 0        |
| P36955 | 0 | 1      | 793.1458 | 2377.423 | 2.43  | 0.00193  | 8.732281 |
| P36955 | 0 | 1      | 728.0969 | 2182.276 | 1.68  | 0.00122  | 5.081532 |
| P36955 | 0 | 1      | 1039.24  | 3115.705 | 2.69  | 0.00279  | 4.694012 |
| P36955 | 0 | 0.8772 | 501.6279 | 1502.869 | 1.61  | 0.00081  | 16.87963 |
| P36955 | 1 | 1      | 644.9993 | 1932.983 | 2.05  | 0.00132  | 6.304137 |
| P36955 | 1 | 1      | 644.9989 | 1932.982 | 1.48  | 0.00096  | 17.45774 |
| P36955 | 0 | 0.8864 | 657.3649 | 1313.723 | 2.66  | 0.00174  | 21.59336 |
| P36955 | 0 | 0.913  | 706.7137 | 2118.127 | 0.44  | 0.00031  | 27.39898 |
| P36955 | 0 | 0.7818 | 758.8452 | 1516.683 | 1.87  | 0.00142  | 4.452028 |
| P36955 | 0 | 1      | 633.3732 | 1265.739 | 3.82  | 0.00242  | 4.903155 |
| P36955 | 0 | 0.7381 | 513.6283 | 1538.87  | 2.28  | 0.00117  | 6.366084 |
| P36955 | 0 | 0.9268 | 852.4495 | 1703.892 | 2.61  | 0.00222  | 3.201324 |
| P36955 | 0 | 1      | 633.3723 | 1265.737 | 2.37  | 0.0015   | 6.473435 |
| P36955 | 0 | 0.7143 | 396.9399 | 1188.805 | 0.85  | 0.00034  | 16.32648 |
| P36955 | 0 | 0.9091 | 482.5787 | 1445.722 | 2.16  | 0.00104  | 6.221749 |
| P36955 | 0 | 0.931  | 554.2665 | 1660.785 | 1.58  | 0.00088  | 7.481616 |
| P36955 | 0 | 0.881  | 594.907  | 1188.807 | 2.37  | 0.00141  | 41.41627 |
| P36955 | 0 | 0.6538 | 465.5943 | 1394.768 | 2.57  | 0.0012   | 0        |
| P36955 | 1 | 1      | 725.7218 | 2175.151 | 7.36  | 0.00533  | 6.280447 |
| P36955 | 1 | 0.9394 | 596.9662 | 1788.884 | 3.79  | 0.00226  | 54.25206 |
| P36955 | 1 | 0.9394 | 596.9662 | 1788.884 | 3.79  | 0.00226  | 54.25206 |
| P36955 | 0 | 1      | 396.9403 | 1188.806 | 1.92  | 0.00076  | 11.23302 |
| P36955 | 0 | 0.7083 | 438.5797 | 1313.725 | 4.25  | 0.00186  | 13.72674 |
| P36955 | 0 | 0.75   | 513.627  | 1538.866 | -0.21 | -0.00011 | 4.669147 |
| P36955 | 0 | 1      | 422.5834 | 1265.736 | 0.96  | 0.00041  | 45.36097 |
| P36955 | 0 | 1      | 836.4507 | 1671.894 | 6.59  | 0.00551  | 33.16814 |
| P36955 | 0 | 0.9286 | 672.4302 | 1343.853 | 2.25  | 0.00151  | 31.12382 |
| P35858 | 0 | 1      | 533.6469 | 1598.926 | 0.91  | 0.00049  | 5.389612 |
| P35858 | 0 | 1      | 400.4872 | 1598.927 | 1.52  | 0.00061  | 19.20371 |
| P35858 | 0 | 1      | 400.4874 | 1598.928 | 1.9   | 0.00076  | 16.05134 |
| P35858 | 0 | 1      | 493.628  | 1478.869 | 1.43  | 0.00071  | 25.24733 |
| P35858 | 0 | 0.8636 | 594.3565 | 1187.706 | 3.29  | 0.00196  | 8.47803  |
| P35858 | 0 | 1      | 463.5774 | 1388.718 | -1.03 | -0.00048 | 41.22989 |
| P35858 | 0 | 1      | 463.5789 | 1388.722 | 2.07  | 0.00096  | 6.000164 |
| P35858 | 0 | 0.9365 | 711.6901 | 2133.056 | 2.66  | 0.00189  | 8.242767 |
| P35858 | 0 | 0.875  | 522.3046 | 1043.602 | 2.12  | 0.00111  | 3.951901 |
| P35858 | 0 | 0.9583 | 415.5446 | 1244.619 | 1.78  | 0.00074  | 42.08899 |
| P35858 | 0 | 1      | 445.5941 | 1334.768 | 1.85  | 0.00082  | 38.7625  |
| P35858 | 0 | 0.875  | 541.624  | 1622.857 | 1.24  | 0.00067  | 3.943749 |
| P35858 | 0 | 0.76   | 395.5487 | 1184.631 | 1.86  | 0.00074  | 6.30772  |
| P35858 | 0 | 0.7551 | 395.5487 | 1184.632 | 1.94  | 0.00077  | 14.68786 |
| P35858 | 0 | 0.871  | 929.1733 | 2785.505 | 2.89  | 0.00268  | 3.399588 |
| P35858 | 0 | 0.9692 | 697.131  | 2785.502 | 1.77  | 0.00123  | 4.313786 |
| P35858 | 0 | 1      | 804.467  | 1607.927 | 1.84  | 0.00148  | 5.22083  |
| P35858 | 0 | 1      | 536.6472 | 1607.927 | 1.99  | 0.00107  | 8.078855 |
| P35858 | 0 | 0.8958 | 697.1312 | 2785.503 | 1.94  | 0.00135  | 8.024984 |
| P35858 | 0 | 1      | 732.4158 | 1463.824 | 1.87  | 0.00137  | 25.78742 |
| P35858 | 0 | 0.8222 | 622.3333 | 1864.985 | 3.54  | 0.0022   | 3.53594  |
| P35858 | 0 | 0.9333 | 872.0438 | 1743.08  | 1.88  | 0.00164  | 8.871238 |
| P35858 | 0 | 1      | 785.7714 | 2355.3   | 4     | 0.00314  | 42.10468 |



|            |   |        |          |          |       |          |          |
|------------|---|--------|----------|----------|-------|----------|----------|
| P35858     | 0 | 1      | 908.0297 | 1815.052 | 1.39  | 0.00126  | 17.05075 |
| P35858     | 0 | 0.974  | 605.69   | 1815.055 | 3.2   | 0.00194  | 1.539676 |
| P35858     | 0 | 1      | 693.88   | 1386.753 | 2.13  | 0.00148  | 13.75502 |
| P35858     | 0 | 1      | 953.5509 | 1906.095 | 1.41  | 0.00134  | 7.353093 |
| P35858     | 0 | 1      | 406.4701 | 1622.859 | 1.98  | 0.00081  | 35.73656 |
| P35858     | 0 | 0.7115 | 503.8006 | 1006.594 | 0.76  | 0.00038  | 4.715031 |
| P35858     | 0 | 0.7778 | 711.6907 | 2133.058 | 3.6   | 0.00256  | 33.77448 |
| P35858     | 0 | 0.7241 | 697.1315 | 2785.504 | 2.47  | 0.00172  | 8.069437 |
| P35858     | 0 | 0.8462 | 929.1719 | 2785.501 | 1.31  | 0.00122  | 3.697706 |
| P35858     | 0 | 0.875  | 594.3568 | 1187.706 | 3.81  | 0.00226  | 33.84117 |
| P35858     | 0 | 0.7879 | 396.5729 | 1187.704 | 2.07  | 0.00082  | 0        |
| P35858     | 0 | 1      | 621.8279 | 1242.649 | 0.72  | 0.00045  | 25.64685 |
| P35858     | 0 | 1      | 533.647  | 1598.926 | 1.03  | 0.00055  | 41.89381 |
| P35858     | 0 | 0.8293 | 525.8325 | 1050.658 | 2.65  | 0.00139  | 17.65205 |
| P35858     | 0 | 1      | 693.8806 | 1386.754 | 3.01  | 0.00209  | 13.39086 |
| P35858     | 0 | 1      | 463.5783 | 1388.72  | 0.95  | 0.00044  | 32.9597  |
| P35858     | 0 | 0.9444 | 811.934  | 1622.861 | 3.36  | 0.00272  | 6.006824 |
| P35858     | 0 | 0.5333 | 697.1307 | 2785.501 | 1.24  | 0.00086  | 6.41454  |
| P35858     | 0 | 1      | 462.9224 | 1386.753 | 1.99  | 0.00092  | 42.73395 |
| P09871     | 0 | 0.8308 | 1040.532 | 2080.057 | 3.51  | 0.00365  | 28.03457 |
| P09871     | 0 | 0.9787 | 694.0219 | 2080.051 | 0.51  | 0.00036  | 0        |
| P09871     | 1 | 1      | 743.8488 | 2972.373 | -2.71 | -0.00201 | 33.75748 |
| P09871     | 1 | 0.95   | 991.4686 | 2972.391 | 3.4   | 0.00336  | 0        |
| P09871     | 0 | 0.9216 | 694.0226 | 2080.053 | 1.57  | 0.00109  | 2.627485 |
| P09871     | 0 | 0.8228 | 694.0229 | 2080.054 | 1.92  | 0.00133  | 63.77286 |
| P09871     | 1 | 1      | 743.8514 | 2972.384 | 0.91  | 0.00067  | 0        |
| P09871     | 0 | 0.9231 | 684.7112 | 2052.119 | -1.24 | -0.00085 | 11.42735 |
| P09871     | 0 | 0.9855 | 684.7129 | 2052.124 | 1.26  | 0.00086  | 7.055655 |
| P09871     | 0 | 1      | 803.0768 | 2407.216 | 2.19  | 0.00176  | 28.86472 |
| P09871     | 0 | 0.5556 | 499.7745 | 1996.076 | 2.2   | 0.0011   | 17.65178 |
| P09871     | 0 | 0.8652 | 846.9512 | 1692.895 | 1.6   | 0.00136  | 3.926589 |
| P09871     | 0 | 0.8689 | 678.8663 | 1356.725 | 2.2   | 0.00149  | 7.856259 |
| P09871     | 0 | 0.9524 | 684.7136 | 2052.126 | 2.24  | 0.00153  | 19.16875 |
| P09871     | 0 | 0.8718 | 830.9255 | 1660.844 | 0.97  | 0.00081  | 3.706363 |
| P09871     | 0 | 0.6905 | 442.221  | 1765.862 | 1.39  | 0.00061  | 15.40198 |
| P09871     | 0 | 1      | 596.2973 | 1786.877 | 0.66  | 0.00039  | 42.90478 |
| P09871     | 0 | 0.7344 | 638.8727 | 1276.738 | 2.45  | 0.00156  | 5.547648 |
| P09871     | 0 | 0.6923 | 581.8585 | 1162.71  | 2.74  | 0.00159  | 3.94896  |
| P09871     | 0 | 1      | 495.7754 | 1980.08  | 1.43  | 0.00071  | 12.07963 |
| P09871     | 0 | 1      | 711.3799 | 1421.752 | 1.4   | 0.00099  | 30.30542 |
| P09871     | 0 | 1      | 639.3295 | 1277.652 | 2.61  | 0.00167  | 24.91023 |
| P09871     | 0 | 0.9667 | 825.4247 | 2474.259 | 1.66  | 0.00137  | 3.619407 |
| P09871     | 0 | 1      | 497.2447 | 1489.72  | 1.75  | 0.00087  | 45.71563 |
| P09871     | 0 | 0.8043 | 581.8586 | 1162.71  | 3.06  | 0.00178  | 6.365846 |
| P09871     | 0 | 1      | 602.5602 | 2407.219 | 3.51  | 0.00211  | 7.649306 |
| P09871     | 0 | 0.9545 | 883.4371 | 1765.867 | 4.17  | 0.00368  | 14.60784 |
| P09871     | 0 | 0.8919 | 684.7139 | 2052.127 | 2.69  | 0.00184  | 31.0742  |
| P48740; P0 | 0 | 1      | 564.259  | 1127.511 | 1.99  | 0.00112  | 2.876967 |
| P09871     | 0 | 0.85   | 619.322  | 2474.266 | 4.29  | 0.00265  | 46.77302 |
| P09871     | 0 | 0.9444 | 589.2943 | 1765.868 | 4.92  | 0.0029   | 5.180348 |
| P09871     | 0 | 0.8462 | 581.8586 | 1162.71  | 3.06  | 0.00178  | 8.288093 |
| P09871     | 0 | 0.9615 | 589.2937 | 1765.867 | 3.99  | 0.00235  | 32.24091 |

|        |   |        |          |          |       |          |          |
|--------|---|--------|----------|----------|-------|----------|----------|
| P09871 | 0 | 0.2667 | 1040.531 | 2080.055 | 2.34  | 0.00243  | 8.7313   |
| P09871 | 0 | 0.6579 | 426.2496 | 1276.734 | -0.64 | -0.00027 | 14.45341 |
| P09871 | 0 | 0.4667 | 499.773  | 1996.07  | -0.74 | -0.00037 | 25.86014 |
| P09871 | 0 | 0.6667 | 495.7746 | 1980.077 | -0.11 | -0.00005 | 28.13392 |
| P09871 | 0 | 0.6944 | 528.8132 | 1056.619 | 1.98  | 0.00105  | 11.61038 |
| P09871 | 0 | 1      | 449.2111 | 1345.619 | 2.81  | 0.00126  | 43.92967 |
| P09871 | 0 | 0.8    | 639.3295 | 1277.652 | 2.52  | 0.00161  | 9.942218 |
| P09871 | 0 | 0.9615 | 589.2926 | 1765.863 | 2.12  | 0.00125  | 7.74291  |
| P09871 | 0 | 0.56   | 554.2871 | 1660.847 | 2.73  | 0.00151  | 11.88295 |
| P09871 | 0 | 1      | 803.0772 | 2407.217 | 2.57  | 0.00207  | 12.02987 |
| P09871 | 0 | 0.8462 | 581.8585 | 1162.71  | 2.85  | 0.00166  | 24.34666 |
| P09871 | 1 | 0.8462 | 394.6046 | 1181.799 | 1.59  | 0.00063  | 49.87727 |
| P09871 | 0 | 0.4857 | 528.8131 | 1056.619 | 1.75  | 0.00093  | 20.8189  |
| P09871 | 0 | 1      | 660.6975 | 1980.078 | 0.52  | 0.00034  | 46.0041  |
| P05156 | 0 | 1      | 746.3646 | 2237.079 | 2.43  | 0.00181  | 51.57938 |
| P05156 | 0 | 0.8302 | 582.3074 | 1744.908 | 2.65  | 0.00154  | 9.603717 |
| P05156 | 0 | 0.9107 | 582.3075 | 1744.908 | 2.86  | 0.00166  | 22.03381 |
| P05156 | 0 | 0.9412 | 582.3076 | 1744.908 | 3.07  | 0.00178  | 11.87974 |
| P05156 | 0 | 0.9444 | 746.364  | 2237.077 | 1.69  | 0.00126  | 28.09837 |
| P05156 | 0 | 0.9677 | 746.3649 | 2237.08  | 2.84  | 0.00212  | 2.860582 |
| P05156 | 0 | 0.2439 | 722.1243 | 2885.475 | 0.23  | 0.00017  | 0        |
| P05156 | 0 | 1      | 744.0195 | 2230.044 | 1.88  | 0.0014   | 15.36472 |
| P05156 | 0 | 1      | 738.6876 | 2214.048 | 1.52  | 0.00113  | 5.621373 |
| P05156 | 0 | 0.6739 | 558.298  | 1672.88  | 3.06  | 0.00171  | 16.23565 |
| P05156 | 0 | 0.7021 | 558.2975 | 1672.878 | 2.08  | 0.00116  | 10.70521 |
| P05156 | 1 | 0.8364 | 792.4341 | 1583.861 | 2.1   | 0.00166  | 0        |
| P05156 | 0 | 0.9565 | 740.9257 | 1480.844 | 2.59  | 0.00192  | 6.642381 |
| P05156 | 0 | 0.6562 | 437.8932 | 1311.665 | 3.48  | 0.00152  | 63.48926 |
| P05156 | 0 | 1      | 704.3052 | 2110.901 | 1.91  | 0.00134  | 4.829153 |
| P05156 | 0 | 1      | 698.9731 | 2094.905 | 1.36  | 0.00095  | 8.653643 |
| P05156 | 0 | 1      | 1047.958 | 2094.908 | 2.85  | 0.00298  | 0.914089 |
| P05156 | 0 | 0.9412 | 698.9736 | 2094.906 | 1.97  | 0.00137  | 14.00094 |
| P05156 | 0 | 1      | 698.9736 | 2094.906 | 2.06  | 0.00144  | 18.73021 |
| P05156 | 0 | 1      | 802.3301 | 2404.976 | 1.7   | 0.00136  | 19.2885  |
| P05156 | 0 | 1      | 802.3301 | 2404.976 | 1.7   | 0.00136  | 4.820234 |
| P05156 | 0 | 1      | 601.9999 | 2404.978 | 2.63  | 0.00158  | 7.230313 |
| P05156 | 0 | 1      | 1202.992 | 2404.977 | 2.29  | 0.00275  | 0        |
| P05156 | 0 | 1      | 768.0881 | 2302.25  | 0.99  | 0.00076  | 5.977662 |
| P05156 | 0 | 1      | 802.3294 | 2404.974 | 0.86  | 0.00069  | 7.037961 |
| P05156 | 0 | 1      | 754.2963 | 2260.874 | 2.17  | 0.00163  | 1.57138  |
| P05156 | 0 | 1      | 602.0001 | 2404.979 | 2.94  | 0.00177  | 13.87017 |
| P05156 | 0 | 1      | 1202.991 | 2404.975 | 1.58  | 0.0019   | 0        |
| P05156 | 0 | 1      | 802.3297 | 2404.975 | 1.24  | 0.001    | 19.79661 |
| P05156 | 0 | 1      | 802.3292 | 2404.973 | 0.56  | 0.00045  | 22.48761 |
| P05156 | 0 | 0.9189 | 477.263  | 1429.774 | 2.25  | 0.00107  | 8.583925 |
| P05156 | 0 | 0.7179 | 576.3433 | 1727.015 | 3.48  | 0.002    | 6.793579 |
| P05156 | 1 | 0.8462 | 628.3768 | 1883.116 | 2.78  | 0.00175  | 14.15436 |
| P05156 | 0 | 0.9535 | 477.2609 | 1429.768 | -2.04 | -0.00097 | 35.31183 |
| P05156 | 0 | 0.8889 | 494.2853 | 1480.841 | 0.78  | 0.00039  | 11.48084 |
| P05156 | 0 | 1      | 472.2299 | 1414.675 | 1.5   | 0.00071  | 37.17046 |
| P05156 | 0 | 0.9524 | 494.2859 | 1480.843 | 1.9   | 0.00094  | 10.58906 |
| P05156 | 0 | 0.8542 | 575.8345 | 1150.662 | 2.57  | 0.00148  | 2.802928 |

|        |   |        |          |          |       |          |          |
|--------|---|--------|----------|----------|-------|----------|----------|
| P05156 | 0 | 1      | 802.3297 | 2404.975 | 1.24  | 0.001    | 11.3441  |
| P05156 | 0 | 0.5294 | 576.3426 | 1727.013 | 2.21  | 0.00127  | 4.145463 |
| P05156 | 1 | 1      | 396.7206 | 1583.86  | 1.78  | 0.0007   | 12.06563 |
| P05156 | 0 | 1      | 754.2958 | 2260.873 | 1.44  | 0.00108  | 0        |
| P05156 | 0 | 1      | 632.8241 | 1264.641 | 2.53  | 0.0016   | 5.045718 |
| P05156 | 0 | 0.5769 | 528.3077 | 1582.909 | 0.84  | 0.00044  | 5.235936 |
| P05156 | 0 | 0.8333 | 738.6877 | 2214.049 | 1.61  | 0.00119  | 9.243632 |
| P05156 | 0 | 0.8125 | 575.8367 | 1150.666 | 6.39  | 0.00368  | 27.92354 |
| P29622 | 1 | 0.8261 | 470.6457 | 1409.922 | 1.43  | 0.00067  | 31.3341  |
| P29622 | 0 | 0.6216 | 578.6372 | 1733.897 | 2.01  | 0.00116  | 0        |
| P29622 | 0 | 0.9247 | 780.7452 | 2340.221 | 1.58  | 0.00123  | 8.01772  |
| P29622 | 0 | 0.6349 | 867.4511 | 1733.895 | 0.89  | 0.00077  | 1.333021 |
| P29622 | 0 | 0.8302 | 525.3164 | 1573.934 | 2.58  | 0.00135  | 12.09627 |
| P29622 | 0 | 0.88   | 394.2394 | 1573.936 | 3.35  | 0.00132  | 47.2286  |
| P29622 | 0 | 0.8793 | 525.3159 | 1573.933 | 1.65  | 0.00086  | 10.61154 |
| P29622 | 0 | 1      | 446.2435 | 1336.716 | 2.14  | 0.00095  | 26.46877 |
| P29622 | 0 | 0.6531 | 639.8701 | 1278.733 | 2.53  | 0.00162  | 29.13237 |
| P29622 | 0 | 0.7297 | 652.409  | 1303.811 | 2.46  | 0.0016   | 7.788028 |
| P29622 | 0 | 0.8361 | 658.381  | 1315.755 | 3.56  | 0.00234  | 37.92939 |
| P29622 | 0 | 1      | 655.5989 | 2619.374 | 1.98  | 0.00129  | 42.28675 |
| P29622 | 0 | 1      | 691.624  | 2763.474 | 1.25  | 0.00086  | 5.390159 |
| P29622 | 0 | 1      | 599.0082 | 1795.01  | 6.09  | 0.00365  | 36.90794 |
| P29622 | 0 | 1      | 920.0116 | 1839.016 | 1.44  | 0.00133  | 25.15557 |
| P29622 | 0 | 0.9231 | 457.6551 | 2284.247 | 1.49  | 0.00068  | 4.56257  |
| P29622 | 0 | 0.9762 | 571.8177 | 2284.249 | 2.55  | 0.00146  | 1.941242 |
| P29622 | 0 | 1      | 541.3156 | 1621.932 | 1.15  | 0.00062  | 6.293672 |
| P29622 | 0 | 0.7143 | 525.3155 | 1573.932 | 0.95  | 0.0005   | 23.56716 |
| P29622 | 0 | 0.9545 | 571.8182 | 2284.251 | 3.41  | 0.00195  | 26.08594 |
| P29622 | 0 | 0.6486 | 867.4524 | 1733.898 | 2.37  | 0.00205  | 6.558759 |
| P29622 | 0 | 0.8846 | 559.6441 | 1676.918 | 2.38  | 0.00133  | 27.20576 |
| P29622 | 0 | 0.7692 | 780.7452 | 2340.221 | 1.58  | 0.00123  | 0        |
| P29622 | 0 | 1      | 541.3168 | 1621.936 | 3.29  | 0.00178  | 11.76832 |
| P29622 | 0 | 0.7561 | 639.8701 | 1278.733 | 2.53  | 0.00162  | 46.18365 |
| P29622 | 0 | 1      | 595.5383 | 2379.131 | 3.02  | 0.0018   | 1.527723 |
| P29622 | 0 | 0.8095 | 379.9126 | 1137.723 | -0.13 | -0.00005 | 45.33997 |
| P29622 | 0 | 0.8857 | 557.793  | 1114.579 | 2.24  | 0.00125  | 3.224221 |
| P29622 | 0 | 1      | 578.637  | 1733.897 | 1.8   | 0.00104  | 45.69037 |
| P29622 | 0 | 0.9394 | 668.8612 | 1336.715 | 1.6   | 0.00107  | 0        |
| P29622 | 0 | 0.4167 | 511.6095 | 1532.814 | 1.4   | 0.00071  | 4.620315 |
| P29622 | 0 | 0.9762 | 485.7413 | 970.4754 | 1.32  | 0.00064  | 15.5806  |
| P29622 | 0 | 0.7647 | 379.9133 | 1137.725 | 1.72  | 0.00065  | 56.82906 |
| P29622 | 0 | 0.625  | 426.915  | 1278.731 | 0.76  | 0.00032  | 44.48211 |
| P29622 | 0 | 0.4375 | 379.9132 | 1137.725 | 1.48  | 0.00056  | 6.59517  |
| P29622 | 0 | 1      | 485.7409 | 970.4745 | 0.44  | 0.00021  | 0        |
| P07225 | 1 | 1      | 489.5554 | 1955.2   | -0.76 | -0.00037 | 52.09441 |
| P07225 | 1 | 1      | 489.557  | 1955.206 | 2.42  | 0.00118  | 24.16482 |
| P07225 | 1 | 1      | 652.4075 | 1955.208 | 3.43  | 0.00223  | 3.54352  |
| P07225 | 1 | 1      | 489.5565 | 1955.204 | 1.48  | 0.00073  | 15.74467 |
| P07225 | 0 | 1      | 548.0277 | 2189.089 | 2.02  | 0.00111  | 8.093472 |
| P07225 | 0 | 1      | 730.3679 | 2189.089 | 2.22  | 0.00162  | 7.549598 |
| P07225 | 0 | 0.8571 | 448.2464 | 1342.725 | 0.74  | 0.00033  | 0        |
| P07225 | 0 | 1      | 726.0372 | 2176.097 | 1.49  | 0.00108  | 2.268145 |

|        |   |        |          |          |       |          |          |
|--------|---|--------|----------|----------|-------|----------|----------|
| P07225 | 0 | 0.9091 | 726.0364 | 2176.095 | 0.48  | 0.00035  | 0        |
| P07225 | 0 | 0.9459 | 708.0433 | 2122.115 | 1.25  | 0.00088  | 69.45781 |
| P07225 | 0 | 1      | 662.9539 | 1986.847 | 1.5   | 0.00099  | 7.562456 |
| P07225 | 0 | 1      | 993.9279 | 1986.848 | 2.12  | 0.00211  | 2.930743 |
| P07225 | 0 | 1      | 495.5996 | 1484.784 | 1.24  | 0.00061  | 46.86454 |
| P07225 | 0 | 0.5862 | 425.2441 | 1273.718 | 0.1   | 0.00004  | 5.363454 |
| P07225 | 1 | 1      | 391.8479 | 1955.21  | 4.55  | 0.00178  | 4.567848 |
| P07225 | 0 | 1      | 618.5644 | 2471.236 | 2.16  | 0.00133  | 46.39608 |
| P07225 | 0 | 0.3542 | 636.8674 | 1272.728 | -0.31 | -0.0002  | 54.32155 |
| P07225 | 0 | 1      | 662.954  | 1986.848 | 1.68  | 0.00112  | 4.724596 |
| P07225 | 0 | 1      | 453.9081 | 1359.71  | 1.13  | 0.00051  | 28.68501 |
| P07225 | 0 | 0.75   | 548.0267 | 2189.085 | 0.35  | 0.00019  | 23.54591 |
| P07225 | 0 | 1      | 581.7874 | 1162.567 | 2.15  | 0.00125  | 4.018451 |
| P07225 | 1 | 0.44   | 453.531  | 1811.102 | 1.54  | 0.0007   | 0        |
| P07225 | 1 | 0.44   | 453.531  | 1811.102 | 1.54  | 0.0007   | 0        |
| P07225 | 0 | 0.8108 | 550.8049 | 1100.603 | 1.51  | 0.00083  | 3.523383 |
| P07225 | 0 | 0.6429 | 436.8947 | 1308.67  | 2.34  | 0.00102  | 24.9109  |
| P07225 | 0 | 0.6327 | 537.8423 | 1074.677 | 1.11  | 0.00059  | 6.927693 |
| P07225 | 0 | 1      | 447.566  | 1340.683 | 2.17  | 0.00097  | 72.39617 |
| P07225 | 0 | 0.84   | 632.02   | 1894.046 | 2.8   | 0.00177  | 5.218619 |
| P07225 | 0 | 1      | 1030.787 | 3090.346 | 3.98  | 0.0041   | 0        |
| P07225 | 0 | 0.9333 | 654.838  | 1308.669 | 1.76  | 0.00115  | 3.647795 |
| P07225 | 0 | 0.9444 | 472.9489 | 1416.832 | 1.52  | 0.00072  | 33.89864 |
| P07225 | 0 | 0.973  | 637.3641 | 1273.721 | 2.53  | 0.00161  | 3.731318 |
| P07225 | 0 | 1      | 662.9535 | 1986.846 | 0.85  | 0.00057  | 69.39865 |
| P07225 | 0 | 0.8    | 947.5237 | 1894.04  | 0     | 0        | 0        |
| P07225 | 0 | 0.125  | 632.0192 | 1894.043 | 1.45  | 0.00091  | 3.703587 |
| P07225 | 1 | 1      | 489.556  | 1955.202 | 0.36  | 0.00018  | 25.0977  |
| P07225 | 0 | 1      | 680.3591 | 1359.711 | 1.99  | 0.00136  | 23.65166 |
| Q06033 | 0 | 0.8333 | 717.364  | 1433.721 | 1.74  | 0.00124  | 5.095287 |
| Q06033 | 0 | 0.7755 | 478.5783 | 1433.72  | 1.56  | 0.00074  | 4.124469 |
| Q06033 | 0 | 0.2909 | 524.337  | 1047.667 | 1.4   | 0.00073  | 16.05836 |
| Q06033 | 0 | 0.9848 | 674.3638 | 1347.72  | 2.44  | 0.00164  | 5.13249  |
| Q06033 | 0 | 0.8571 | 449.9106 | 1347.717 | 0.14  | 0.00006  | 3.799736 |
| Q06033 | 0 | 1      | 596.3308 | 1786.978 | -1.31 | -0.00078 | 27.80802 |
| Q06033 | 1 | 1      | 515.5504 | 2059.18  | 1.25  | 0.00064  | 7.552632 |
| Q06033 | 1 | 1      | 515.5504 | 2059.18  | 1.25  | 0.00064  | 27.59592 |
| Q06033 | 1 | 1      | 412.6416 | 2059.179 | 0.73  | 0.0003   | 14.9729  |
| Q06033 | 0 | 1      | 652.5955 | 2607.36  | 2.38  | 0.00155  | 15.97357 |
| Q06033 | 0 | 0.9792 | 869.7908 | 2607.358 | 1.52  | 0.00132  | 7.197168 |
| Q06033 | 0 | 0.875  | 652.5945 | 2607.356 | 0.89  | 0.00058  | 36.31327 |
| Q06033 | 0 | 1      | 626.9993 | 1878.983 | 2.26  | 0.00142  | 6.623813 |
| Q06033 | 0 | 0.9677 | 626.9994 | 1878.984 | 2.46  | 0.00154  | 4.493001 |
| Q06033 | 0 | 1      | 884.1866 | 3533.725 | 1.81  | 0.0016   | 8.859504 |
| Q06033 | 1 | 1      | 515.5504 | 2059.18  | 1.25  | 0.00064  | 14.88018 |
| Q06033 | 0 | 1      | 602.3126 | 1203.618 | 2.44  | 0.00147  | 14.28543 |
| Q06033 | 0 | 1      | 578.9656 | 1734.882 | 3.02  | 0.00175  | 29.57657 |
| Q06033 | 0 | 1      | 533.6088 | 1598.812 | 2.23  | 0.00119  | 7.847265 |
| Q06033 | 0 | 1      | 501.2535 | 1501.746 | 0.94  | 0.00047  | 54.43179 |
| Q06033 | 0 | 1      | 562.8388 | 1124.67  | 4.06  | 0.00228  | 0        |
| Q06033 | 0 | 1      | 632.6179 | 2527.45  | 1.61  | 0.00101  | 25.46742 |
| Q06033 | 0 | 0.7222 | 525.8157 | 1050.624 | 2.01  | 0.00105  | 48.52787 |

|        |   |        |          |          |       |          |          |
|--------|---|--------|----------|----------|-------|----------|----------|
| Q06033 | 1 | 1      | 479.5247 | 1915.077 | 0.91  | 0.00043  | 18.26378 |
| Q06033 | 1 | 1      | 479.5247 | 1915.077 | 0.91  | 0.00043  | 18.26378 |
| Q06033 | 0 | 0.225  | 524.3376 | 1047.668 | 2.56  | 0.00134  | 26.33937 |
| Q06033 | 0 | 1      | 406.8902 | 1218.656 | 2.11  | 0.00086  | 12.48371 |
| Q06033 | 0 | 0.9231 | 412.2218 | 1234.651 | 2.15  | 0.00089  | 8.826192 |
| Q06033 | 0 | 0.9444 | 406.8904 | 1218.657 | 2.71  | 0.0011   | 7.366235 |
| Q06033 | 0 | 0.4681 | 490.2879 | 979.5686 | 2.42  | 0.00118  | 0        |
| Q06033 | 0 | 1      | 406.8902 | 1218.656 | 2.26  | 0.00092  | 11.81282 |
| Q06033 | 0 | 1      | 406.8903 | 1218.656 | 2.49  | 0.00101  | 0        |
| Q06033 | 0 | 1      | 375.5609 | 1124.668 | 2.17  | 0.00081  | 7.676147 |
| Q06033 | 0 | 0.3696 | 452.286  | 903.5647 | 1.77  | 0.0008   | 8.108923 |
| Q06033 | 0 | 1      | 717.3626 | 1433.718 | -0.22 | -0.00016 | 32.01134 |
| Q06033 | 1 | 0.7143 | 417.9268 | 1251.766 | 2.12  | 0.00089  | 35.27917 |
| Q06033 | 0 | 0.6774 | 525.8158 | 1050.624 | 2.24  | 0.00118  | 56.26735 |
| Q06033 | 0 | 1      | 724.6178 | 2895.449 | 1.97  | 0.00142  | 19.02348 |
| Q06033 | 0 | 0.8333 | 724.6174 | 2895.448 | 1.38  | 0.001    | 43.64614 |
| P05546 | 0 | 0.8983 | 684.3933 | 1367.779 | 1.42  | 0.00097  | 5.107193 |
| P05546 | 0 | 0.8542 | 456.5982 | 1367.78  | 1.97  | 0.0009   | 10.54598 |
| P05546 | 0 | 1      | 422.9582 | 1688.811 | 1.45  | 0.00061  | 21.37404 |
| P05546 | 0 | 1      | 418.9596 | 1672.816 | 1.78  | 0.00074  | 20.61712 |
| P05546 | 0 | 0.9459 | 390.8149 | 1950.045 | 0.89  | 0.00035  | 13.15316 |
| P05546 | 0 | 0.9333 | 650.6873 | 1950.047 | 1.97  | 0.00128  | 12.74824 |
| P05546 | 0 | 1      | 488.2671 | 1950.046 | 1.46  | 0.00071  | 17.90572 |
| P05546 | 0 | 0.96   | 390.8151 | 1950.046 | 1.44  | 0.00056  | 49.93361 |
| P05546 | 0 | 0.9474 | 488.2668 | 1950.045 | 0.96  | 0.00047  | 7.269555 |
| P05546 | 0 | 0.8571 | 390.8152 | 1950.047 | 1.67  | 0.00065  | 38.90092 |
| P05546 | 0 | 1      | 650.6874 | 1950.048 | 2.06  | 0.00134  | 4.116437 |
| P05546 | 0 | 1      | 488.267  | 1950.046 | 1.34  | 0.00065  | 8.490896 |
| P05546 | 0 | 1      | 390.8153 | 1950.047 | 1.91  | 0.00074  | 42.34333 |
| P05546 | 0 | 0.8571 | 488.2669 | 1950.046 | 1.21  | 0.00059  | 31.47655 |
| P05546 | 0 | 1      | 614.8198 | 1228.632 | 1.94  | 0.00119  | 4.21518  |
| P05546 | 0 | 0.8222 | 456.5979 | 1367.779 | 1.3   | 0.00059  | 4.294487 |
| P05546 | 0 | 1      | 1300.645 | 2600.283 | 1.01  | 0.00132  | 0        |
| P05546 | 0 | 1      | 558.2769 | 1672.816 | 1.53  | 0.00085  | 8.989056 |
| P05546 | 0 | 1      | 418.9593 | 1672.815 | 1.12  | 0.00047  | 66.43404 |
| P05546 | 0 | 1      | 558.2771 | 1672.817 | 1.97  | 0.0011   | 31.87263 |
| P05546 | 0 | 0.9333 | 390.8153 | 1950.047 | 1.91  | 0.00074  | 16.67837 |
| P05546 | 0 | 1      | 754.3737 | 2261.107 | 1.31  | 0.00098  | 4.960749 |
| P05546 | 0 | 0.8596 | 594.3485 | 1187.69  | 1.87  | 0.00111  | 5.523003 |
| P05546 | 0 |        | 525.0418 | 2097.145 | 2.37  | 0.00124  | 30.4408  |
| P05546 | 0 | 0.9104 | 704.9274 | 1408.847 | 2.29  | 0.00161  | 9.035565 |
| P05546 | 0 | 0.831  | 514.7912 | 1028.575 | 1.59  | 0.00082  | 1.912749 |
| P05546 | 0 | 0.8621 | 684.3937 | 1367.78  | 2.14  | 0.00146  | 6.342637 |
| P05546 | 0 | 1      | 517.621  | 1550.849 | 2.45  | 0.00127  | 24.47589 |
| P05546 | 0 | 0.8723 | 586.842  | 1172.677 | 0.97  | 0.00057  | 9.827888 |
| P05546 | 0 | 0.8537 | 586.8425 | 1172.678 | 1.8   | 0.00106  | 8.092008 |
| P05546 | 0 | 0.8209 | 612.343  | 1223.679 | 2.9   | 0.00177  | 26.70862 |
| P05546 | 0 | 1      | 469.5863 | 1406.744 | 1.26  | 0.00059  | 8.773459 |
| P05546 | 0 | 0.9459 | 517.6221 | 1550.852 | 4.46  | 0.00231  | 13.27002 |
| P05546 | 0 | 0.7679 | 522.2977 | 1043.588 | 2.73  | 0.00142  | 8.028572 |
| P05546 | 0 | 0.8387 | 525.041  | 2097.142 | 0.97  | 0.00051  | 2.637595 |
| P05546 | 1 | 0.9655 | 390.8892 | 1170.653 | 2.5   | 0.00098  | 53.49796 |

|        |   |        |          |          |       |          |          |
|--------|---|--------|----------|----------|-------|----------|----------|
| P05546 | 0 | 0.5873 | 554.3557 | 1107.704 | 2.2   | 0.00122  | 11.93278 |
| P05546 | 0 | 0.7838 | 704.9271 | 1408.847 | 1.94  | 0.00137  | 34.49294 |
| P05546 | 0 | 0.7805 | 684.3939 | 1367.78  | 2.32  | 0.00158  | 10.88038 |
| P05546 | 0 | 0.9    | 418.9595 | 1672.816 | 1.7   | 0.00071  | 65.35334 |
| P05546 | 0 | 0.88   | 514.79   | 1028.573 | -0.66 | -0.00034 | 24.05058 |
| P05546 | 0 | 1      | 422.9584 | 1688.812 | 2.02  | 0.00085  | 20.28531 |
| P05546 | 0 | 1      | 706.3406 | 2117.007 | 2.64  | 0.00186  | 24.91445 |
| P05546 | 0 | 1      | 542.7686 | 1084.53  | 1.88  | 0.00102  | 25.37009 |
| P05546 | 0 | 0.6154 | 554.355  | 1107.703 | 0.99  | 0.00055  | 7.310923 |
| P05546 | 0 | 0.8649 | 586.8435 | 1172.68  | 3.57  | 0.00209  | 20.9722  |
| P05546 | 0 | 1      | 418.9595 | 1672.816 | 1.7   | 0.00071  | 50.979   |
| P05546 | 0 | 0.8095 | 594.3494 | 1187.691 | 3.41  | 0.00203  | 34.46654 |
| P05546 | 0 | 0.9032 | 819.3958 | 2456.173 | -2.01 | -0.00164 | 3.179378 |
| P05546 | 0 | 0.5833 | 554.355  | 1107.703 | 0.99  | 0.00055  | 6.6423   |
| P05546 | 0 | 0.9355 | 456.5972 | 1367.777 | -0.1  | -0.00005 | 8.576745 |
| P05546 | 0 | 0.7778 | 470.2872 | 1408.847 | 1.93  | 0.00091  | 9.667555 |
| P05546 | 0 | 0.88   | 632.8763 | 1264.745 | 2.56  | 0.00162  | 12.10985 |
| P05546 | 0 | 0.8571 | 488.2669 | 1950.046 | 1.15  | 0.00056  | 13.32102 |
| P05546 | 0 | 0.6226 | 482.3043 | 963.6013 | 1.84  | 0.00089  | 8.058602 |
| P05546 | 0 | 0.5667 | 391.5641 | 1172.678 | 1.84  | 0.00072  | 20.48727 |
| P05546 | 0 | 1      | 436.2154 | 1306.632 | 2     | 0.00087  | 59.08113 |
| P05546 | 0 | 0.6538 | 456.5978 | 1367.779 | 1.23  | 0.00056  | 34.88422 |
| P05546 | 0 | 0.8065 | 556.8062 | 1112.605 | 0.5   | 0.00028  | 17.30888 |
| P05546 | 0 | 0.6341 | 537.35   | 1073.693 | 0.54  | 0.00029  | 9.001741 |
| P05546 | 0 | 0.9143 | 537.7971 | 1074.587 | 1.45  | 0.00078  | 8.942545 |
| P05546 | 0 | 0.6047 | 537.3502 | 1073.693 | 0.88  | 0.00048  | 14.5428  |
| P05546 | 0 | 1      | 514.7903 | 1028.573 | -0.19 | -0.0001  | 48.03494 |
| P05546 | 0 | 0.7188 | 594.3494 | 1187.691 | 3.41  | 0.00203  | 30.62728 |
| P05546 | 0 | 0.4138 | 396.5682 | 1187.69  | 2.25  | 0.00089  | 12.97514 |
| P05546 | 0 | 1      | 418.9597 | 1672.817 | 2.07  | 0.00087  | 37.033   |
| P05546 | 0 | 1      | 422.958  | 1688.81  | 1.01  | 0.00043  | 23.03354 |
| P05546 | 0 | 0.7742 | 537.7969 | 1074.587 | 1.23  | 0.00066  | 14.1712  |
| P05546 | 0 | 1      | 558.2771 | 1672.817 | 1.97  | 0.0011   | 38.85274 |
| O75882 | 0 | 1      | 629.9962 | 1887.974 | 2.67  | 0.00168  | 20.40479 |
| O75882 | 0 | 1      | 629.9967 | 1887.976 | 3.45  | 0.00217  | 37.64902 |
| O75882 | 0 | 1      | 397.8196 | 1985.069 | 5.06  | 0.00201  | 9.054237 |
| O75882 | 0 | 1      | 497.0209 | 1985.062 | 1.55  | 0.00077  | 19.87938 |
| O75882 | 0 | 1      | 497.0212 | 1985.063 | 2.23  | 0.00111  | 25.03966 |
| O75882 | 0 | 0.9821 | 566.9973 | 1698.977 | 1.95  | 0.0011   | 0        |
| O75882 | 0 | 0.8222 | 425.4996 | 1698.977 | 1.47  | 0.00063  | 5.870743 |
| O75882 | 0 | 1      | 667.948  | 2001.829 | 1.65  | 0.0011   | 51.50071 |
| O75882 | 0 | 0.8676 | 707.8694 | 1414.731 | 3.01  | 0.00213  | 5.005092 |
| O75882 | 0 | 1      | 432.5839 | 1295.737 | 1.7   | 0.00073  | 18.61798 |
| O75882 | 0 | 0.76   | 425.4992 | 1698.975 | 0.54  | 0.00023  | 18.25538 |
| O75882 | 0 | 0.8857 | 635.8181 | 1270.629 | 2.98  | 0.00189  | 0        |
| O75882 | 0 | 0.6809 | 515.8109 | 1030.614 | 1.82  | 0.00094  | 100      |
| O75882 | 0 | 1      | 636.8228 | 1272.638 | 1.46  | 0.00093  | 36.89316 |
| O75882 | 0 | 0.9737 | 746.8445 | 1492.682 | 1.02  | 0.00076  | 26.07495 |
| O75882 | 0 | 0.973  | 498.2312 | 1492.679 | -0.76 | -0.00038 | 49.05568 |
| O75882 | 0 | 1      | 572.4954 | 2286.96  | 1.62  | 0.00092  | 4.33848  |
| O75882 | 0 | 1      | 472.9178 | 1416.739 | 0.11  | 0.00005  | 7.323316 |
| O75882 | 0 | 1      | 472.9185 | 1416.741 | 1.59  | 0.00075  | 29.52758 |

|        |   |        |          |          |       |          |          |
|--------|---|--------|----------|----------|-------|----------|----------|
| O75882 | 0 | 1      | 826.8613 | 1652.715 | 1.68  | 0.00139  | 3.657782 |
| O75882 | 0 | 1      | 551.5767 | 1652.715 | 1.78  | 0.00098  | 6.450633 |
| O75882 | 0 | 1      | 826.8612 | 1652.715 | 1.61  | 0.00133  | 3.96211  |
| O75882 | 0 | 1      | 551.577  | 1652.716 | 2.34  | 0.00129  | 4.07166  |
| O75882 | 0 | 1      | 826.8613 | 1652.715 | 1.75  | 0.00145  | 3.485675 |
| O75882 | 0 | 1      | 551.5757 | 1652.713 | 0.12  | 0.00007  | 17.29018 |
| O75882 | 0 | 1      | 551.5765 | 1652.715 | 1.45  | 0.0008   | 30.92761 |
| O75882 | 1 | 0.6905 | 432.2879 | 1294.849 | 2.55  | 0.0011   | 12.82202 |
| O75882 | 0 | 0.8485 | 629.9966 | 1887.975 | 3.35  | 0.00211  | 23.78763 |
| O75882 | 0 | 1      | 667.9496 | 2001.834 | 4.03  | 0.00269  | 38.54329 |
| O75882 | 0 | 0.5741 | 557.7854 | 1114.564 | 1.49  | 0.00083  | 0        |
| O75882 | 0 | 1      | 826.8616 | 1652.716 | 2.05  | 0.00169  | 0        |
| O75882 | 0 | 0.8889 | 600.989  | 1800.952 | 4.48  | 0.00269  | 0        |
| O75882 | 0 | 1      | 503.5645 | 1508.679 | 2.45  | 0.00123  | 32.19097 |
| O75882 | 0 | 0.8718 | 515.8102 | 1030.613 | 0.63  | 0.00033  | 4.302829 |
| O75882 | 0 | 1      | 447.2598 | 1339.765 | 2.69  | 0.0012   | 49.29813 |
| O75882 | 0 | 0.7674 | 585.8184 | 1170.629 | 4.25  | 0.00249  | 6.118416 |
| O75882 | 0 | 1      | 477.5803 | 1430.726 | 2.98  | 0.00142  | 33.68989 |
| O75882 | 0 | 1      | 472.2478 | 1414.729 | 1.21  | 0.00057  | 14.18521 |
| O75882 | 0 | 1      | 708.8743 | 1416.741 | 1.99  | 0.00141  | 12.73052 |
| O75882 | 0 | 0.9    | 648.3741 | 1295.741 | 4.53  | 0.00294  | 6.079935 |
| O75882 | 0 | 0.9714 | 759.3888 | 1517.77  | 3.43  | 0.0026   | 17.28933 |
| O75882 | 0 | 0.4857 | 650.4002 | 1299.793 | 2.02  | 0.00131  | 11.32585 |
| O75882 | 1 | 0.7391 | 432.2885 | 1294.851 | 4.03  | 0.00174  | 29.20449 |
| O75882 | 0 | 0.9643 | 849.9913 | 1698.975 | 0.77  | 0.00066  | 0        |
| O75882 | 0 | 1      | 506.5939 | 1517.767 | 1.29  | 0.00065  | 32.05256 |
| O75882 | 0 | 0.7941 | 715.8666 | 1430.726 | 2.61  | 0.00187  | 0        |
| O75882 | 0 | 1      | 762.9904 | 2286.957 | 0.26  | 0.0002   | 0        |
| P01011 | 0 | 1      | 732.7279 | 2196.169 | 2.45  | 0.00179  | 27.02432 |
| P01011 | 0 | 0.9878 | 727.3644 | 2180.079 | 1.66  | 0.0012   | 6.330095 |
| P01011 | 0 | 0.9412 | 727.3654 | 2180.082 | 3     | 0.00218  | 9.782677 |
| P01011 | 0 | 0.9111 | 727.3626 | 2180.073 | -0.86 | -0.00063 | 68.71194 |
| P01011 | 0 | 0.6818 | 639.9624 | 1917.873 | 2.94  | 0.00188  | 7.27101  |
| P01011 | 0 | 0.8507 | 639.962  | 1917.872 | 2.37  | 0.00152  | 5.345961 |
| P01011 | 0 | 0.8485 | 639.9616 | 1917.87  | 1.7   | 0.00109  | 4.447939 |
| P01011 | 0 | 0.7027 | 639.9614 | 1917.87  | 1.32  | 0.00084  | 5.952508 |
| P01011 | 0 | 0.8571 | 461.618  | 1382.839 | 2.67  | 0.00123  | 6.237031 |
| P01011 | 0 | 0.7667 | 480.7598 | 960.5123 | 1.43  | 0.00068  | 0        |
| P01011 | 0 | 0.2041 | 646.3469 | 1937.026 | 2.51  | 0.00162  | 4.420014 |
| P01011 | 0 | 0.8605 | 732.7282 | 2196.17  | 2.78  | 0.00204  | 0        |
| P01011 | 0 | 0.6    | 646.3474 | 1937.028 | 3.18  | 0.00205  | 57.40021 |
| P01011 | 0 | 0.4154 | 646.3469 | 1937.026 | 2.51  | 0.00162  | 8.768698 |
| P01011 | 0 | 0.4773 | 969.0175 | 1937.028 | 3.31  | 0.0032   | 11.5645  |
| P01011 | 0 | 0.8704 | 1098.588 | 2196.168 | 2.04  | 0.00224  | 7.102388 |
| P01011 | 0 | 0.9806 | 732.7275 | 2196.168 | 1.95  | 0.00142  | 5.536043 |
| P01011 | 0 | 0.377  | 646.3469 | 1937.026 | 2.42  | 0.00156  | 11.68077 |
| P01011 | 0 | 1      | 732.7278 | 2196.169 | 2.28  | 0.00167  | 10.44922 |
| P01011 | 0 | 0.2353 | 646.3472 | 1937.027 | 2.89  | 0.00187  | 11.58224 |
| P01011 | 0 | 0.4773 | 646.3459 | 1937.023 | 0.91  | 0.00059  | 0        |
| P01011 | 0 | 0.5738 | 646.3471 | 1937.027 | 2.8   | 0.00181  | 8.053593 |
| P01011 | 0 | 0.8    | 481.0129 | 1921.03  | 1.69  | 0.00081  | 17.55138 |
| P01011 | 0 | 0.9604 | 961.0207 | 1921.034 | 3.99  | 0.00384  | 11.11899 |

|        |   |        |          |          |       |          |          |
|--------|---|--------|----------|----------|-------|----------|----------|
| P01011 | 0 | 0.8769 | 641.0154 | 1921.032 | 2.78  | 0.00178  | 9.924909 |
| P01011 | 0 | 0.1818 | 646.3487 | 1937.032 | 5.26  | 0.00339  | 0        |
| P01011 | 0 | 0.5    | 646.3474 | 1937.028 | 3.18  | 0.00205  | 7.485449 |
| P01011 | 0 | 0.2619 | 646.3468 | 1937.026 | 2.33  | 0.0015   | 19.36611 |
| P01011 | 0 | 0.2683 | 646.3455 | 1937.022 | 0.34  | 0.00022  | 0        |
| P01011 | 0 | 0.1111 | 646.3491 | 1937.033 | 5.92  | 0.00382  | 0        |
| P01011 | 0 | 0.2162 | 646.3472 | 1937.027 | 2.99  | 0.00193  | 58.01707 |
| P01011 | 0 | 0.1364 | 646.3477 | 1937.028 | 3.65  | 0.00236  | 13.72743 |
| P01011 | 0 | 0.2903 | 646.3494 | 1937.034 | 6.39  | 0.00413  | 4.94283  |
| P01011 | 0 | 0.4068 | 646.3465 | 1937.025 | 1.85  | 0.0012   | 5.867637 |
| P01011 | 0 | 0.24   | 646.3467 | 1937.026 | 2.23  | 0.00144  | 4.32307  |
| P01011 | 0 | 0.9143 | 549.7972 | 2196.167 | 1.52  | 0.00084  | 10.23917 |
| P01011 | 0 | 0.6562 | 646.3472 | 1937.027 | 2.99  | 0.00193  | 24.55198 |
| P01011 | 0 | 0.9732 | 1098.587 | 2196.167 | 1.59  | 0.00175  | 0        |
| P01011 | 0 | 0.9806 | 732.7261 | 2196.164 | 0.03  | 0.00002  | 5.156268 |
| P01011 | 0 | 0.4737 | 646.3469 | 1937.026 | 2.51  | 0.00162  | 2.307965 |
| P01011 | 0 | 0.9683 | 727.361  | 2180.068 | -3.05 | -0.00221 | 45.86599 |
| P01011 | 0 | 0.9775 | 732.728  | 2196.169 | 2.53  | 0.00185  | 29.4907  |
| P01011 | 0 | 0.625  | 646.3466 | 1937.025 | 2.04  | 0.00132  | 0        |
| P01011 | 0 | 0.9709 | 732.7277 | 2196.168 | 2.11  | 0.00155  | 4.90298  |
| P01011 | 0 | 0.9709 | 732.7283 | 2196.17  | 3.03  | 0.00222  | 5.212932 |
| P01011 | 0 | 0.9806 | 732.7274 | 2196.168 | 1.78  | 0.0013   | 4.810615 |
| P01011 | 0 | 0.9074 | 727.3659 | 2180.083 | 3.76  | 0.00273  | 63.1729  |
| P01011 | 0 | 0.9907 | 732.7275 | 2196.168 | 1.86  | 0.00136  | 6.13323  |
| P01011 | 0 | 0.9231 | 727.3684 | 2180.091 | 7.2   | 0.00523  | 8.941708 |
| P01011 | 0 | 0.8718 | 727.3637 | 2180.076 | 0.65  | 0.00047  | 13.91943 |
| P01011 | 0 | 0.8889 | 727.3648 | 2180.08  | 2.24  | 0.00163  | 7.874072 |
| P01011 | 0 | 0.8056 | 727.3655 | 2180.082 | 3.17  | 0.0023   | 22.79355 |
| P01011 | 0 | 0.902  | 727.3649 | 2180.08  | 2.41  | 0.00175  | 23.50187 |
| P01011 | 0 | 0.9355 | 727.3643 | 2180.078 | 1.49  | 0.00108  | 21.47308 |
| P01011 | 0 | 0.9138 | 727.3662 | 2180.084 | 4.18  | 0.00304  | 4.732151 |
| P01011 | 0 | 0.8864 | 727.3658 | 2180.083 | 3.59  | 0.00261  | 22.91838 |
| P01011 | 0 | 0.8841 | 732.728  | 2196.17  | 2.61  | 0.00191  | 14.28222 |
| P01011 | 0 | 0.873  | 732.7272 | 2196.167 | 1.53  | 0.00112  | 7.208468 |
| P01011 | 0 | 0.9178 | 732.7252 | 2196.161 | -1.31 | -0.00096 | 28.62843 |
| P01011 | 0 | 0.9296 | 732.725  | 2196.161 | -1.47 | -0.00108 | 32.45002 |
| P01011 | 0 | 1      | 732.7276 | 2196.168 | 2.03  | 0.00149  | 0        |
| P01011 | 0 | 0.9077 | 732.7289 | 2196.172 | 3.78  | 0.00277  | 17.94738 |
| P01011 | 0 | 0.963  | 732.7278 | 2196.169 | 2.36  | 0.00173  | 10.48346 |
| P01011 | 0 | 0.956  | 732.7279 | 2196.169 | 2.45  | 0.00179  | 13.35351 |
| P01011 | 0 | 0.956  | 732.7275 | 2196.168 | 1.95  | 0.00142  | 12.45677 |
| P01011 | 0 | 0.9697 | 732.7279 | 2196.169 | 2.45  | 0.00179  | 5.133433 |
| P01011 | 0 | 0.9091 | 727.3635 | 2180.076 | 0.48  | 0.00035  | 8.529231 |
| P01011 | 0 | 0.8871 | 732.7271 | 2196.167 | 1.28  | 0.00094  | 8.839244 |
| P01011 | 0 | 0.8824 | 732.7262 | 2196.164 | 0.11  | 0.00008  | 23.46121 |
| P01011 | 0 | 0.8864 | 727.3653 | 2180.081 | 2.92  | 0.00212  | 58.99309 |
| P01011 | 0 | 0.9677 | 732.7281 | 2196.17  | 2.7   | 0.00197  | 5.998935 |
| P01011 | 0 | 0.9348 | 732.7287 | 2196.172 | 3.53  | 0.00258  | 0        |
| P01011 | 1 | 0.9538 | 779.3978 | 2336.179 | 1.22  | 0.00095  | 5.520219 |
| P01011 | 1 | 0.9783 | 779.3947 | 2336.17  | -2.78 | -0.00217 | 39.36861 |
| P01011 | 0 | 0.8846 | 675.401  | 1349.795 | 2.12  | 0.00143  | 6.799006 |
| P01011 | 0 | 0.8929 | 675.4013 | 1349.795 | 2.48  | 0.00167  | 6.737877 |



|        |   |        |          |          |       |          |          |
|--------|---|--------|----------|----------|-------|----------|----------|
| P01011 | 0 | 0.8833 | 675.4005 | 1349.794 | 1.4   | 0.00094  | 18.78126 |
| P01011 | 0 | 1      | 727.3643 | 2180.078 | 1.57  | 0.00114  | 10.39135 |
| P01011 | 0 | 1      | 727.3644 | 2180.079 | 1.74  | 0.00127  | 9.483211 |
| P01011 | 0 | 0.9867 | 727.3644 | 2180.079 | 1.66  | 0.0012   | 100      |
| P01011 | 0 | 1      | 727.3643 | 2180.078 | 1.49  | 0.00108  | 18.07335 |
| P01011 | 0 | 1      | 727.36   | 2180.065 | -4.39 | -0.00319 | 13.49717 |
| P01011 | 0 | 0.9747 | 727.3648 | 2180.08  | 2.16  | 0.00157  | 6.657966 |
| P01011 | 0 | 0.8974 | 727.3633 | 2180.075 | 0.15  | 0.00011  | 24.10193 |
| P01011 | 0 | 0.8936 | 727.3638 | 2180.077 | 0.82  | 0.00059  | 30.60896 |
| P01011 | 0 | 0.9524 | 727.3652 | 2180.081 | 2.75  | 0.002    | 9.344493 |
| P01011 | 0 | 0.95   | 727.3641 | 2180.078 | 1.24  | 0.0009   | 6.835411 |
| P01011 | 0 | 0.9565 | 727.3647 | 2180.08  | 2.08  | 0.00151  | 6.192315 |
| P01011 | 0 | 0.9577 | 727.3682 | 2180.09  | 6.95  | 0.00505  | 9.001811 |
| P01011 | 0 | 0.9524 | 727.3657 | 2180.083 | 3.5   | 0.00255  | 7.989721 |
| P01011 | 0 | 0.9636 | 727.3679 | 2180.089 | 6.44  | 0.00468  | 30.03227 |
| P01011 | 0 | 0.7778 | 552.8108 | 1104.614 | 1.23  | 0.00068  | 3.689874 |
| P01011 | 0 | 0.875  | 461.618  | 1382.839 | 2.67  | 0.00123  | 51.83607 |
| P01011 | 1 | 0.6458 | 475.6341 | 1424.888 | 2.83  | 0.00134  | 15.32195 |
| P01011 | 0 | 0.8431 | 461.6179 | 1382.839 | 2.33  | 0.00108  | 59.2453  |
| P01011 | 1 | 0.6579 | 475.6332 | 1424.885 | 1.03  | 0.00049  | 11.64417 |
| P01011 | 0 | 0.9306 | 691.9236 | 1382.84  | 2.96  | 0.00205  | 7.514454 |
| P01011 | 0 | 0.875  | 461.6173 | 1382.837 | 1.21  | 0.00056  | 10.50876 |
| P01011 | 0 | 0.7556 | 552.8118 | 1104.616 | 3.11  | 0.00172  | 15.82358 |
| P01011 | 0 | 0.78   | 461.6173 | 1382.837 | 1.14  | 0.00053  | 24.20318 |
| P01011 | 0 | 0.9691 | 732.7285 | 2196.171 | 3.2   | 0.00234  | 6.700497 |
| P01011 | 0 | 0.974  | 727.3649 | 2180.08  | 2.33  | 0.00169  | 5.278649 |
| P01011 | 0 | 0.9677 | 732.7282 | 2196.17  | 2.86  | 0.0021   | 3.910068 |
| P01011 | 0 | 0.971  | 727.3649 | 2180.08  | 2.41  | 0.00175  | 2.219801 |
| P01011 | 0 | 0.931  | 727.3662 | 2180.084 | 4.18  | 0.00304  | 9.922313 |
| P01011 | 0 | 0.8936 | 727.3643 | 2180.078 | 1.57  | 0.00114  | 3.000642 |
| P01011 | 0 | 0.8767 | 641.0156 | 1921.032 | 2.97  | 0.0019   | 5.808604 |
| P01011 | 0 | 0.9091 | 961.0204 | 1921.033 | 3.68  | 0.00353  | 19.02673 |
| P01011 | 0 | 0.907  | 461.6178 | 1382.839 | 2.27  | 0.00105  | 45.93854 |
| P01011 | 0 | 0.775  | 639.9617 | 1917.87  | 1.8   | 0.00115  | 31.56483 |
| P01011 | 0 | 0.9302 | 727.3646 | 2180.079 | 1.99  | 0.00145  | 9.477134 |
| P01011 | 0 | 0.9531 | 727.3594 | 2180.064 | -5.23 | -0.0038  | 12.40727 |
| P01011 | 1 | 0.9615 | 683.9828 | 3415.885 | 1.51  | 0.00103  | 12.98392 |
| P01011 | 0 | 0.7333 | 570.6362 | 1709.894 | 4.2   | 0.00239  | 9.848882 |
| P01011 | 1 | 0.0909 | 818.7027 | 3271.789 | 3.47  | 0.00284  | 80.72858 |
| P01011 | 0 | 1      | 608.3701 | 1215.733 | 1.85  | 0.00112  | 30.99804 |
| P01011 | 0 | 1      | 838.4446 | 2513.319 | -3.37 | -0.00282 | 45.07218 |
| P01011 | 0 | 0.9604 | 855.4495 | 1709.892 | 2.74  | 0.00234  | 7.78426  |
| P01011 | 0 | 0.8627 | 570.6356 | 1709.892 | 3.02  | 0.00172  | 11.24312 |
| P01011 | 0 | 1      | 1257.171 | 2513.335 | 2.95  | 0.00371  | 0        |
| P01011 | 0 | 0.9808 | 783.4017 | 1565.796 | 7.21  | 0.00565  | 6.032496 |
| P01011 | 0 | 1      | 680.4213 | 1359.835 | 1.91  | 0.0013   | 4.081489 |
| P01011 | 0 | 0.8125 | 680.4214 | 1359.836 | 2     | 0.00136  | 26.18096 |
| P01011 | 0 | 0.9206 | 680.4211 | 1359.835 | 1.55  | 0.00105  | 18.55902 |
| P01011 | 0 | 0.898  | 453.95   | 1359.835 | 1.92  | 0.00087  | 6.862297 |
| P01011 | 0 | 0.9344 | 680.4215 | 1359.836 | 2.09  | 0.00142  | 4.949018 |
| P01011 | 0 | 0.8868 | 680.4219 | 1359.837 | 2.81  | 0.00191  | 7.349617 |
| P01011 | 0 | 0.9062 | 862.1312 | 2584.379 | 1.58  | 0.00137  | 4.554194 |

|        |   |        |          |          |       |          |          |
|--------|---|--------|----------|----------|-------|----------|----------|
| P01011 | 0 | 0.9143 | 1292.694 | 2584.382 | 2.63  | 0.0034   | 0        |
| P01011 | 0 | 1      | 1176.617 | 2352.227 | 1.89  | 0.00222  | 1.434845 |
| P01011 | 0 | 1      | 784.7468 | 2352.226 | 1.52  | 0.00119  | 5.503526 |
| P01011 | 0 | 1      | 983.2015 | 2947.59  | 2.8   | 0.00275  | 4.112854 |
| P01011 | 0 | 0.9    | 737.6525 | 2947.588 | 2.17  | 0.0016   | 3.816468 |
| P01011 | 0 | 0.6667 | 646.3487 | 1937.032 | 5.26  | 0.00339  | 4.58301  |
| P01011 | 0 | 0.75   | 691.9226 | 1382.838 | 1.46  | 0.00101  | 7.544816 |
| P01011 | 0 | 0.6098 | 559.322  | 1117.637 | 3.06  | 0.00171  | 14.97183 |
| P01011 | 0 | 0.8696 | 679.3308 | 2035.978 | 2.44  | 0.00166  | 21.37796 |
| P01011 | 0 | 0.5484 | 576.8489 | 1152.691 | 3.41  | 0.00196  | 7.310606 |
| P01011 | 0 | 0.6364 | 684.6942 | 2052.068 | 3.01  | 0.00206  | 41.55156 |
| P01011 | 0 | 0.8387 | 727.3648 | 2180.08  | 2.24  | 0.00163  | 11.10891 |
| P01011 | 0 | 0.8333 | 732.7275 | 2196.168 | 1.86  | 0.00136  | 5.73735  |
| P01011 | 1 | 0.8947 | 848.9765 | 3392.884 | 2.21  | 0.00188  | 4.747308 |
| P01011 | 0 | 0.8065 | 413.5836 | 1238.736 | 2     | 0.00083  | 51.57315 |
| P01011 | 0 | 0.9756 | 783.4021 | 1565.797 | 7.68  | 0.00601  | 36.22265 |
| P01011 | 0 | 0.7561 | 450.6032 | 1349.795 | 2.25  | 0.00101  | 10.72296 |
| P01011 | 0 | 0.5238 | 552.8117 | 1104.616 | 2.78  | 0.00153  | 0        |
| P01011 | 0 | 0.9    | 545.7752 | 2180.079 | 1.85  | 0.00101  | 9.96628  |
| P01011 | 0 | 0.8857 | 732.7275 | 2196.168 | 1.86  | 0.00136  | 8.462298 |
| P01011 | 0 | 0.871  | 727.3668 | 2180.086 | 4.93  | 0.00358  | 9.234404 |
| P01011 | 0 | 0.88   | 480.2226 | 1917.868 | 0.74  | 0.00036  | 3.580239 |
| P01011 | 0 | 0.8889 | 549.7979 | 2196.17  | 2.75  | 0.00151  | 47.22902 |
| P01011 | 0 | 0.913  | 727.3632 | 2180.075 | -0.02 | -0.00002 | 59.61802 |
| P01011 | 0 | 0.5714 | 559.3209 | 1117.634 | 0.98  | 0.00055  | 3.94251  |
| P01011 | 0 | 0.5526 | 552.812  | 1104.617 | 3.44  | 0.0019   | 12.99882 |
| P01011 | 0 | 0.9429 | 727.3608 | 2180.068 | -3.3  | -0.0024  | 0        |
| P01011 | 0 | 0.3939 | 732.7288 | 2196.172 | 3.61  | 0.00265  | 5.816994 |
| P01011 | 1 | 0.7647 | 779.3991 | 2336.183 | 2.78  | 0.00217  | 1.928383 |
| P01011 | 0 | 0.7895 | 675.4005 | 1349.794 | 1.31  | 0.00088  | 29.49121 |
| P01011 | 0 | 0.973  | 691.9251 | 1382.843 | 5.08  | 0.00351  | 0        |
| P01011 | 0 | 0.9091 | 727.3637 | 2180.076 | 0.65  | 0.00047  | 55.27946 |
| P01011 | 0 | 0.9111 | 603.3504 | 1205.694 | 3.09  | 0.00186  | 3.656434 |
| P01011 | 0 | 0.7273 | 727.3648 | 2180.08  | 2.24  | 0.00163  | 4.636286 |
| P01011 | 0 | 0.75   | 461.6142 | 1382.828 | -5.54 | -0.00256 | 67.44629 |
| P01011 | 0 | 0.8065 | 727.3663 | 2180.084 | 4.26  | 0.0031   | 69.36417 |
| P01011 | 0 | 0.8214 | 450.6019 | 1349.791 | -0.47 | -0.00021 | 58.21704 |
| P01011 | 0 | 0.7455 | 480.7582 | 960.509  | -1.94 | -0.00093 | 18.37774 |
| P01011 | 0 | 0.8387 | 1098.59  | 2196.172 | 3.7   | 0.00407  | 1.41029  |
| P01011 | 0 | 0.5217 | 547.8198 | 1094.632 | 0.53  | 0.00029  | 0        |
| P01011 | 0 | 0.4667 | 592.9817 | 1776.931 | 3.46  | 0.00205  | 8.745883 |
| P01011 | 0 | 0.6818 | 727.3641 | 2180.078 | 1.32  | 0.00096  | 9.722131 |
| P01011 | 0 | 0.68   | 727.3658 | 2180.083 | 3.67  | 0.00267  | 4.955748 |
| P01011 | 0 | 0.6667 | 727.3644 | 2180.079 | 1.74  | 0.00127  | 0        |
| P01011 | 0 | 0.72   | 727.364  | 2180.077 | 1.07  | 0.00078  | 8.431595 |
| P01011 | 0 | 0.3077 | 646.3475 | 1937.028 | 3.46  | 0.00223  | 0        |
| P01011 | 0 | 0.7391 | 727.3669 | 2180.086 | 5.18  | 0.00377  | 6.854796 |
| P01011 | 0 | 1      | 639.9608 | 1917.868 | 0.37  | 0.00023  | 5.430933 |
| P01011 | 0 | 0.6842 | 576.849  | 1152.691 | 3.51  | 0.00203  | 35.08983 |
| P01011 | 0 | 0.7778 | 732.7262 | 2196.164 | 0.11  | 0.00008  | 24.11256 |
| P01011 | 0 | 0.4516 | 691.9232 | 1382.839 | 2.34  | 0.00162  | 7.880322 |
| P01011 | 0 | 0.9167 | 727.3641 | 2180.078 | 1.32  | 0.00096  | 15.89617 |

|        |   |        |          |          |       |          |          |
|--------|---|--------|----------|----------|-------|----------|----------|
| P01011 | 0 | 0.4286 | 727.3633 | 2180.075 | 0.15  | 0.00011  | 58.01072 |
| P01011 | 0 | 0.5769 | 504.7972 | 1008.587 | 2.45  | 0.00124  | 9.381697 |
| P01011 | 0 | 1      | 645.2933 | 1933.865 | 1.83  | 0.00118  | 13.65664 |
| P01011 | 0 | 0.7188 | 675.4021 | 1349.797 | 3.75  | 0.00253  | 39.30369 |
| P01011 | 0 | 0.5385 | 522.6028 | 1565.794 | 5.8   | 0.00303  | 12.50836 |
| P01011 | 0 | 0.5833 | 576.8491 | 1152.691 | 3.73  | 0.00215  | 27.61102 |
| P01011 | 0 | 0.3488 | 576.8499 | 1152.692 | 5     | 0.00288  | 0        |
| P01011 | 0 | 0.3846 | 855.4499 | 1709.893 | 3.24  | 0.00277  | 0        |
| P01011 | 0 | 0.6    | 675.403  | 1349.799 | 5.1   | 0.00344  | 18.30736 |
| P01011 | 0 | 0.359  | 576.8488 | 1152.69  | 3.09  | 0.00178  | 38.54438 |
| P01011 | 0 | 0.6154 | 619.8718 | 1238.736 | 2.13  | 0.00132  | 0        |
| P01011 | 0 | 0.7647 | 603.3508 | 1205.694 | 3.8   | 0.00229  | 27.74755 |
| P01011 | 0 | 1      | 645.2944 | 1933.869 | 3.44  | 0.00221  | 0        |
| P01011 | 0 | 1      | 959.4399 | 1917.872 | 2.86  | 0.00274  | 0        |
| P01011 | 0 | 0.7714 | 680.4222 | 1359.837 | 3.26  | 0.00221  | 46.98319 |
| P01011 | 0 | 0.4783 | 675.4006 | 1349.794 | 1.58  | 0.00106  | 30.54335 |
| P01011 | 0 | 0.2308 | 732.7273 | 2196.167 | 1.61  | 0.00118  | 5.95366  |
| P01011 | 0 | 0.9    | 732.7267 | 2196.166 | 0.78  | 0.00057  | 17.02778 |
| P01011 | 0 | 0.3333 | 384.9011 | 1152.689 | 1.7   | 0.00065  | 5.01408  |
| P01011 | 0 | 1      | 1090.545 | 2180.082 | 3.26  | 0.00355  | 0        |
| P01011 | 0 | 0.2273 | 969.0176 | 1937.028 | 3.37  | 0.00327  | 11.49991 |
| P08697 | 0 | 0.9841 | 620.9963 | 1860.974 | 2.73  | 0.00169  | 7.839658 |
| P08697 | 0 | 1      | 459.9076 | 1377.708 | 1.16  | 0.00053  | 24.45631 |
| P08697 | 0 | 1      | 747.7625 | 2241.273 | 1.58  | 0.00118  | 4.178572 |
| P08697 | 0 | 1      | 408.8752 | 1224.611 | 1.84  | 0.00075  | 11.05856 |
| P08697 | 0 | 0.9531 | 459.9077 | 1377.709 | 1.5   | 0.00069  | 11.22103 |
| P08697 | 0 | 1      | 689.3569 | 1377.707 | 0.04  | 0.00003  | 3.31067  |
| P08697 | 0 | 0.9459 | 459.9078 | 1377.709 | 1.76  | 0.00081  | 39.67487 |
| P08697 | 0 | 0.9762 | 808.7187 | 2424.142 | -1.2  | -0.00097 | 6.840429 |
| P08697 | 0 | 1      | 808.7206 | 2424.147 | 1.14  | 0.00092  | 1.0388   |
| P08697 | 1 | 1      | 1147.98  | 3441.926 | 4.24  | 0.00486  | 0        |
| P08697 | 0 | 1      | 806.4486 | 2417.331 | 2.19  | 0.00176  | 4.455618 |
| P08697 | 0 | 1      | 605.0864 | 2417.324 | -0.87 | -0.00053 | 22.27456 |
| P08697 | 0 | 1      | 758.4125 | 2273.223 | -0.46 | -0.00035 | 4.778725 |
| P08697 | 0 | 1      | 1209.167 | 2417.326 | -0.1  | -0.00013 | 0        |
| P08697 | 1 | 0.92   | 507.9724 | 1521.903 | 1.77  | 0.0009   | 31.3874  |
| P08697 | 0 | 1      | 557.5633 | 2227.231 | 2.85  | 0.00159  | 2.113505 |
| P08697 | 0 | 1      | 557.5609 | 2227.222 | -1.54 | -0.00086 | 43.05179 |
| P08697 | 0 | 1      | 743.0809 | 2227.228 | 1.37  | 0.00102  | 53.70806 |
| P08697 | 0 | 1      | 717.6367 | 2867.525 | 1.56  | 0.00112  | 3.556955 |
| P08697 | 0 | 1      | 956.5137 | 2867.526 | 2.05  | 0.00196  | 1.590074 |
| P08697 | 1 | 1      | 602.3309 | 1804.978 | 0.87  | 0.00052  | 14.54232 |
| P08697 | 1 | 1      | 452.0002 | 1804.979 | 1.41  | 0.00063  | 13.73543 |
| P08697 | 0 | 0.95   | 534.3026 | 1600.893 | 2.14  | 0.00114  | 13.17543 |
| P08697 | 0 | 0.9853 | 534.3022 | 1600.892 | 1.45  | 0.00077  | 10.64095 |
| P08697 | 0 | 0.9038 | 645.8314 | 1290.656 | 2.14  | 0.00138  | 6.25425  |
| P08697 | 0 | 0.9524 | 808.7217 | 2424.15  | 2.5   | 0.00202  | 2.095165 |
| P08697 | 0 | 0.9821 | 617.3068 | 1233.606 | 1.54  | 0.00095  | 7.332612 |
| P08697 | 0 | 0.9375 | 747.7647 | 2241.279 | 4.52  | 0.00338  | 25.70563 |
| P08697 | 0 | 0.7111 | 569.8397 | 1138.672 | 0.9   | 0.00051  | 10.01029 |
| P08697 | 0 | 0.85   | 743.0811 | 2227.229 | 1.62  | 0.0012   | 1.427455 |
| P08697 | 0 | 0.9455 | 426.7201 | 852.433  | 0.86  | 0.00036  | 16.26723 |

|            |   |        |          |          |       |          |          |
|------------|---|--------|----------|----------|-------|----------|----------|
| P08697     | 0 | 0.8438 | 930.9914 | 1860.976 | 3.29  | 0.00306  | 0        |
| P08697     | 1 | 0.0303 | 450.5816 | 1349.73  | 0.59  | 0.00026  | 7.403651 |
| P08697     | 0 | 0.7632 | 554.3007 | 1107.594 | 2.31  | 0.00128  | 12.01888 |
| P08697     | 0 | 1      | 569.8389 | 1138.67  | -0.49 | -0.00028 | 12.47715 |
| P08697     | 0 | 1      | 408.8751 | 1224.611 | 1.39  | 0.00057  | 34.50393 |
| P08697     | 1 |        | 450.5816 | 1349.73  | 0.59  | 0.00026  | 7.403651 |
| P08697     | 1 | 1      | 498.6156 | 1493.832 | 0.48  | 0.00024  | 3.019221 |
| P08697     | 0 | 0.975  | 617.3097 | 1233.612 | 6.19  | 0.00382  | 76.93299 |
| P08697     | 0 | 0.7045 | 539.3314 | 1077.656 | 0.86  | 0.00046  | 22.85773 |
| P08697     | 0 | 1      | 708.0306 | 2122.077 | 0.22  | 0.00016  | 12.51516 |
| P08697     | 0 | 0.8605 | 498.7713 | 996.5353 | 1.03  | 0.00051  | 1.454245 |
| P08697     | 0 | 0.5789 | 534.3027 | 1600.893 | 2.37  | 0.00126  | 7.435753 |
| P08697     | 0 | 0.8889 | 620.9967 | 1860.976 | 3.32  | 0.00206  | 32.792   |
| P08697     | 0 | 0.8095 | 569.8411 | 1138.675 | 3.36  | 0.00192  | 8.838999 |
| P08697     | 0 | 1      | 408.8759 | 1224.613 | 3.41  | 0.00139  | 47.78581 |
| P08697     | 0 | 0.66   | 539.332  | 1077.657 | 1.88  | 0.00101  | 6.402196 |
| P08697     | 0 | 0.9737 | 554.2999 | 1107.592 | 0.88  | 0.00049  | 6.456849 |
| P02748     | 0 | 0.8971 | 721.3851 | 1441.763 | 2.05  | 0.00148  | 28.50583 |
| P02748     | 0 | 0.8533 | 721.3855 | 1441.764 | 2.64  | 0.0019   | 13.72103 |
| P02748     | 0 | 0.7143 | 481.2588 | 1441.762 | 1.32  | 0.00063  | 7.952652 |
| P02748     | 1 | 1      | 661.3207 | 2642.261 | 2.66  | 0.00176  | 4.516679 |
| Q96BY6; PO | 1 | 0.6429 | 444.2751 | 1330.811 | 0.93  | 0.00041  | 11.91255 |
| P02748     | 0 | 0.8478 | 585.3345 | 1753.989 | 3.58  | 0.0021   | 3.53109  |
| P02748     | 0 | 0.88   | 585.3341 | 1753.988 | 2.96  | 0.00173  | 8.223726 |
| P02748     | 0 | 0.8605 | 585.3344 | 1753.989 | 3.38  | 0.00197  | 0        |
| Q96BY6; PO | 1 | 0.6429 | 444.2752 | 1330.811 | 1.06  | 0.00047  | 11.27259 |
| P02748     | 0 | 0.8235 | 655.3669 | 1309.726 | 2.49  | 0.00163  | 35.55614 |
| P02748     | 0 | 0.9024 | 485.2819 | 1453.831 | 3.95  | 0.00191  | 16.73701 |
| P02748     | 0 | 0.7556 | 485.2805 | 1453.827 | 1.18  | 0.00057  | 7.262913 |
| P02748     | 0 | 0.9103 | 800.4114 | 1599.816 | 1.31  | 0.00105  | 4.19293  |
| P02748     | 0 | 1      | 800.4117 | 1599.816 | 1.62  | 0.00129  | 0        |
| P02748     | 0 | 0.9762 | 510.9893 | 1530.953 | 2.32  | 0.00118  | 9.499393 |
| P02748     | 1 | 0.907  | 506.5877 | 1517.748 | 1.26  | 0.00064  | 8.212698 |
| P02748     | 0 | 1      | 604.6417 | 1811.911 | 2.89  | 0.00174  | 11.40588 |
| P02748     | 0 | 0.9608 | 765.9802 | 1530.953 | 2.23  | 0.00171  | 10.22955 |
| P02748     | 0 | 1      | 604.6416 | 1811.91  | 2.68  | 0.00162  | 8.477773 |
| P02748     | 0 | 0.973  | 604.6419 | 1811.911 | 3.19  | 0.00193  | 12.34804 |
| P02748     | 0 | 0.8571 | 588.3236 | 1175.64  | 0.84  | 0.0005   | 3.074739 |
| P02748     | 0 | 1      | 732.3498 | 2195.035 | 1.71  | 0.00125  | 4.295065 |
| P02748     | 0 | 0.9796 | 622.3576 | 1865.058 | 3.18  | 0.00198  | 4.854928 |
| P02748     | 0 | 1      | 622.357  | 1865.056 | 2.2   | 0.00137  | 8.400503 |
| P02748     | 0 | 1      | 1031.071 | 3091.198 | 2.97  | 0.00306  | 0        |
| P02748     | 0 | 0.74   | 605.8527 | 1210.698 | 4.87  | 0.00295  | 49.50336 |
| P02748     | 0 | 0.95   | 622.357  | 1865.056 | 2.2   | 0.00137  | 22.77367 |
| P02748     | 0 | 1      | 1031.069 | 3091.192 | 1.08  | 0.00111  | 1.76024  |
| P02748     | 0 | 1      | 1031.069 | 3091.194 | 1.55  | 0.0016   | 2.476987 |
| P02748     | 0 | 0.8776 | 588.3254 | 1175.644 | 4.06  | 0.00239  | 5.735367 |
| P02748     | 0 | 0.5217 | 467.0195 | 1865.056 | 2     | 0.00093  | 8.701584 |
| P02748     | 0 | 0.9048 | 623.8138 | 1246.62  | 1.49  | 0.00093  | 19.21581 |
| P02748     | 0 | 1      | 549.5145 | 2195.036 | 2.37  | 0.0013   | 53.77746 |
| P02748     | 0 | 0.5333 | 877.4957 | 1753.984 | 0.84  | 0.00074  | 23.87137 |
| P02748     | 0 | 0.7609 | 613.3387 | 1225.67  | 2.8   | 0.00171  | 16.93781 |

|        |   |        |          |          |       |          |          |
|--------|---|--------|----------|----------|-------|----------|----------|
| P02748 | 1 | 0.5135 | 627.3484 | 1880.031 | 3.22  | 0.00202  | 59.19175 |
| P02748 | 0 | 1      | 556.6071 | 1667.807 | 2.08  | 0.00116  | 18.06947 |
| P02748 | 0 | 1      | 516.2722 | 1031.537 | 0.38  | 0.0002   | 2.426755 |
| P02748 | 0 | 0.6    | 585.3356 | 1753.992 | 5.57  | 0.00326  | 6.639752 |
| P02748 | 0 | 0.7742 | 392.5518 | 1175.641 | 1.69  | 0.00066  | 3.590029 |
| P02748 | 0 | 1      | 541.2862 | 1081.565 | 0.47  | 0.00026  | 0        |
| P02748 | 0 | 0.6944 | 649.3345 | 1297.662 | 2.94  | 0.00191  | 28.59999 |
| P02748 | 0 | 1      | 551.762  | 1102.517 | 0.26  | 0.00014  | 13.45381 |
| P02748 | 0 | 0.9143 | 672.3293 | 1343.651 | 0.05  | 0.00003  | 9.411049 |
| P02748 | 0 | 1      | 773.5555 | 3091.2   | 3.66  | 0.00283  | 14.69446 |
| P02748 | 0 | 0.92   | 510.9885 | 1530.951 | 0.82  | 0.00042  | 3.92548  |
| P02748 | 0 | 0.9355 | 727.419  | 1453.831 | 3.75  | 0.00272  | 28.40584 |
| P02748 | 0 | 0.5    | 463.2709 | 925.5345 | 0.97  | 0.00045  | 14.30839 |
| P02748 | 0 | 0.9474 | 516.2721 | 1031.537 | 0.14  | 0.00007  | 20.68933 |
| P02748 | 0 | 1      | 448.5568 | 1343.656 | 3.42  | 0.00153  | 38.84637 |
| P02748 | 0 | 0.8696 | 877.497  | 1753.987 | 2.3   | 0.00202  | 24.86744 |
| P05155 | 0 | 0.7808 | 813.9149 | 1626.823 | 1.63  | 0.00133  | 27.45401 |
| P05155 | 0 | 0.75   | 630.8521 | 1260.697 | 4.15  | 0.00262  | 34.43736 |
| P05155 | 0 | 1      | 502.9379 | 1506.799 | 0.9   | 0.00045  | 16.22123 |
| P05155 | 0 | 0.9701 | 753.9038 | 1506.8   | 1.76  | 0.00132  | 6.8633   |
| P05155 | 0 | 1      | 502.9377 | 1506.799 | 0.59  | 0.0003   | 9.515435 |
| P05155 | 0 | 0.2308 | 678.3734 | 1355.74  | 0.86  | 0.00058  | 7.427076 |
| P05155 | 0 | 1      | 502.9385 | 1506.801 | 2.05  | 0.00103  | 11.18597 |
| P05155 | 0 | 0.8571 | 553.8557 | 1106.704 | 1.54  | 0.00085  | 17.3296  |
| P05155 | 1 | 0.9388 | 498.7966 | 1992.164 | 0.11  | 0.00006  | 7.109019 |
| P05155 | 1 | 1      | 498.7969 | 1992.166 | 0.78  | 0.00039  | 15.6536  |
| P05155 | 0 | 1      | 776.9479 | 1552.889 | 3.95  | 0.00306  | 34.64158 |
| P05155 | 0 | 0.7925 | 518.3001 | 1552.886 | 2.01  | 0.00104  | 8.647229 |
| P05155 | 0 | 0.9861 | 776.9457 | 1552.884 | 1.04  | 0.00081  | 6.178887 |
| P05155 | 0 | 0.9375 | 518.2991 | 1552.883 | 0.24  | 0.00013  | 11.20672 |
| P05155 | 0 | 0.8621 | 573.9962 | 1719.974 | 4.01  | 0.0023   | 4.546702 |
| P05155 | 0 | 0.9672 | 573.9957 | 1719.972 | 3.05  | 0.00175  | 8.324049 |
| P05155 | 0 | 0.94   | 609.6642 | 1826.978 | 1.14  | 0.00069  | 40.27356 |
| P05155 | 0 | 1      | 657.6989 | 1971.082 | 2.13  | 0.0014   | 70.74886 |
| P05155 | 1 | 1      | 664.7274 | 1992.168 | 1.74  | 0.00116  | 48.67271 |
| P05155 | 1 | 1      | 498.7972 | 1992.167 | 1.46  | 0.00073  | 6.137949 |
| P05155 | 1 | 1      | 498.7969 | 1992.166 | 0.78  | 0.00039  | 11.33153 |
| P05155 | 1 | 1      | 664.7276 | 1992.168 | 2.02  | 0.00134  | 6.572153 |
| P05155 | 1 | 1      | 498.7971 | 1992.167 | 1.21  | 0.0006   | 9.56251  |
| P05155 | 1 | 0.9286 | 664.7276 | 1992.168 | 2.02  | 0.00134  | 13.71631 |
| P05155 | 1 | 0.9762 | 498.7975 | 1992.168 | 2.01  | 0.001    | 10.88901 |
| P05155 | 1 | 0.9787 | 664.728  | 1992.169 | 2.57  | 0.00171  | 19.56452 |
| P05155 | 1 | 1      | 498.7977 | 1992.169 | 2.32  | 0.00115  | 6.897486 |
| P05155 | 1 | 1      | 664.7277 | 1992.169 | 2.2   | 0.00146  | 8.604988 |
| P05155 | 1 | 1      | 498.7972 | 1992.167 | 1.4   | 0.0007   | 5.554324 |
| P05155 | 1 | 1      | 725.7204 | 2175.147 | -0.18 | -0.00013 | 5.538439 |
| P05155 | 0 | 0.8868 | 633.3319 | 1897.981 | -0.49 | -0.00031 | 45.75161 |
| P05155 | 0 | 0.8913 | 633.3351 | 1897.991 | 4.72  | 0.00298  |          |
| P05155 | 0 | 0.5918 | 596.312  | 1786.921 | 2.47  | 0.00147  | 9.017102 |
| P05155 | 0 | 0.5263 | 596.3126 | 1786.923 | 3.5   | 0.00208  | 8.668063 |
| P05155 | 0 | 0.9892 | 941.4992 | 1881.991 | 2.13  | 0.002    | 5.764037 |
| P05155 | 0 | 1      | 628.0012 | 1881.989 | 1.11  | 0.0007   | 9.961451 |

|        |   |        |          |          |       |          |          |
|--------|---|--------|----------|----------|-------|----------|----------|
| P05155 | 0 | 0.9592 | 628.0028 | 1881.994 | 3.55  | 0.00223  | 21.20113 |
| P05155 | 0 | 0.9701 | 704.8952 | 1408.783 | 1.93  | 0.00136  | 100      |
| P05155 | 0 | 0.6364 | 590.9809 | 1770.928 | 3.48  | 0.00206  | 9.38533  |
| P05155 | 0 | 1      | 803.514  | 1606.021 | 1.63  | 0.00131  | 54.42621 |
| P05155 | 0 | 1      | 665.405  | 1329.803 | 1.19  | 0.00079  | 3.418461 |
| P05155 | 0 | 0.9655 | 657.6988 | 1971.082 | 1.95  | 0.00128  | 4.940819 |
| P05155 | 0 | 1      | 657.6975 | 1971.078 | -0.1  | -0.00006 | 4.593298 |
| P05155 | 0 | 0.9778 | 803.5136 | 1606.02  | 1.1   | 0.00088  | 8.854333 |
| P05155 | 0 | 1      | 657.6995 | 1971.084 | 3.06  | 0.00201  | 5.545911 |
| P05155 | 1 | 1      | 935.264  | 3738.034 | 1.89  | 0.00177  | 22.93683 |
| P05155 | 0 | 0.9643 | 558.7997 | 1116.592 | 2.4   | 0.00134  | 2.467804 |
| P05155 | 0 | 0.8696 | 553.8552 | 1106.703 | 0.66  | 0.00036  | 9.413018 |
| P05155 | 0 | 0.7442 | 420.9031 | 1260.695 | 2.45  | 0.00103  | 3.548035 |
| P05155 | 0 | 1      | 452.5848 | 1355.74  | 1.16  | 0.00052  | 33.89859 |
| P05155 | 0 | 0.7111 | 630.8511 | 1260.695 | 2.7   | 0.0017   | 1.952793 |
| P05155 | 0 | 1      | 502.9382 | 1506.8   | 1.56  | 0.00079  | 23.17642 |
| P05155 | 0 | 1      | 502.9386 | 1506.801 | 2.29  | 0.00115  | 10.60185 |
| P05155 | 1 | 1      | 616.696  | 1848.073 | 6.08  | 0.00374  | 47.06972 |
| P05155 | 1 | 1      | 616.696  | 1848.073 | 6.08  | 0.00374  | 47.06972 |
| P05155 | 0 | 0.9697 | 628.0021 | 1881.992 | 2.57  | 0.00161  | 6.722567 |
| P05155 | 0 | 0.7692 | 377.4554 | 1506.8   | 1.5   | 0.00056  | 24.43747 |
| P05155 | 0 | 1      | 493.5257 | 1971.081 | 1.51  | 0.00074  | 47.32162 |
| P05155 | 0 | 0.7209 | 630.8511 | 1260.695 | 2.7   | 0.0017   | 8.381699 |
| P05155 | 1 | 0.72   | 462.7719 | 1848.066 | 2.04  | 0.00094  | 28.85786 |
| P05155 | 1 | 0.72   | 462.7719 | 1848.066 | 2.04  | 0.00094  | 28.85786 |
| P05155 | 0 | 1      | 502.9379 | 1506.799 | 0.9   | 0.00045  | 20.95833 |
| P05155 | 0 | 0.95   | 579.9674 | 1737.887 | 1.46  | 0.00085  | 4.890219 |
| P05155 | 1 | 0.9167 | 498.7984 | 1992.172 | 3.85  | 0.00192  | 42.96174 |
| P05155 | 0 | 1      | 454.9042 | 1362.698 | 1.85  | 0.00084  | 7.62984  |
| P05155 | 0 | 0.8913 | 593.3541 | 1185.701 | 1.65  | 0.00098  | 12.90112 |
| P05155 | 0 | 0.8462 | 628.0024 | 1881.993 | 3.06  | 0.00192  | 9.43808  |
| P05155 | 0 | 0.8065 | 408.5546 | 1223.649 | 0.59  | 0.00024  | 8.87458  |
| P05155 | 0 | 0.92   | 518.3002 | 1552.886 | 2.37  | 0.00122  | 46.51334 |
| P05155 | 0 | 0.9143 | 454.9046 | 1362.699 | 2.59  | 0.00118  | 10.32163 |
| P05155 | 0 | 0.9048 | 612.3295 | 1223.652 | 2.57  | 0.00157  | 15.76263 |
| P05155 | 0 | 0.7407 | 408.555  | 1223.651 | 1.64  | 0.00067  | 5.195457 |
| P05155 | 0 | 0.7297 | 704.8955 | 1408.784 | 2.37  | 0.00167  | 6.081885 |
| P05155 | 0 | 0.9524 | 606.3232 | 1211.639 | 2.38  | 0.00144  | 20.57968 |
| P05155 | 0 | 1      | 502.9376 | 1506.798 | 0.41  | 0.00021  | 35.68925 |
| P05155 | 0 | 0.9216 | 455.7354 | 910.4634 | 0.61  | 0.00028  | 4.795763 |
| P05155 | 0 | 0.8889 | 797.1044 | 2389.299 | 0.85  | 0.00067  | 3.498694 |
| P05155 | 0 | 0.9615 | 573.9966 | 1719.975 | 4.65  | 0.00266  | 26.31799 |
| P05155 | 0 | 0.7778 | 630.851  | 1260.695 | 2.41  | 0.00152  | 34.86462 |
| P05155 | 0 | 1      | 413.8869 | 1239.646 | 2.27  | 0.00094  | 13.30621 |
| P05155 | 0 | 0.8889 | 427.2237 | 853.4401 | 1.34  | 0.00057  | 0        |
| P05155 | 0 | 0.7442 | 630.8501 | 1260.693 | 1.05  | 0.00066  | 3.153018 |
| P05155 | 1 | 0.8636 | 664.731  | 1992.179 | 7.16  | 0.00476  | 0        |
| P05155 | 0 | 1      | 657.6984 | 1971.081 | 1.39  | 0.00091  | 11.03835 |
| P05155 | 1 | 1      | 412.2425 | 1234.713 | 1.96  | 0.00081  | 15.56115 |
| P05155 | 0 | 0.8571 | 518.2988 | 1552.882 | -0.35 | -0.00018 | 27.90638 |
| P05155 | 0 | 0.9355 | 493.5274 | 1971.088 | 4.97  | 0.00245  | 40.7527  |
| P05155 | 0 | 0.8571 | 547.8005 | 1094.594 | -0.21 | -0.00012 | 31.73866 |

|            |   |        |          |          |       |          |          |
|------------|---|--------|----------|----------|-------|----------|----------|
| P05155     | 0 | 0.8571 | 558.7996 | 1116.592 | 2.18  | 0.00122  | 63.81391 |
| P05155     | 0 | 1      | 502.9384 | 1506.801 | 1.99  | 0.001    | 10.98347 |
| P05155     | 0 | 0.875  | 408.5553 | 1223.651 | 2.39  | 0.00097  | 10.37905 |
| P05155     | 0 | 0.7857 | 869.4476 | 1737.888 | 1.75  | 0.00152  | 4.719529 |
| P05155     | 0 | 1      | 536.0128 | 1606.024 | 3.45  | 0.00185  | 3.772555 |
| P05155     | 0 | 0.7037 | 408.5558 | 1223.653 | 3.58  | 0.00146  | 11.29998 |
| P05155     | 0 | 0.8974 | 455.7358 | 910.4643 | 1.61  | 0.00074  | 31.77118 |
| P05155     | 1 | 1      | 725.7156 | 2175.132 | -6.75 | -0.00489 | 17.1963  |
| P05155     | 0 | 0.6429 | 633.3344 | 1897.989 | 3.56  | 0.00225  | 36.11507 |
| P05155     | 0 | 0.4444 | 454.9038 | 1362.697 | 0.84  | 0.00038  | 55.81579 |
| P05155     | 0 | 1      | 869.4512 | 1737.895 | 5.89  | 0.00512  | 0        |
| P05155     | 0 | 0.9592 | 455.7362 | 910.4651 | 2.49  | 0.00113  | 27.91975 |
| P05155     | 0 | 1      | 986.0445 | 1971.082 | 1.89  | 0.00186  | 2.959084 |
| P05155     | 0 | 0.4545 | 518.3004 | 1552.887 | 2.72  | 0.00141  | 23.34968 |
| P05155     | 0 | 0.9535 | 455.7355 | 910.4637 | 0.94  | 0.00043  | 9.749778 |
| P00736     | 0 | 0.95   | 511.0303 | 2041.099 | 3.38  | 0.00172  | 27.90041 |
| P00736     | 0 | 1      | 961.4528 | 2882.344 | -0.06 | -0.00005 | 0        |
| P00736     | 0 | 0.9318 | 617.9728 | 1851.904 | 3.33  | 0.00205  | 10.13322 |
| P00736     | 0 | 0.8947 | 617.9717 | 1851.9   | 1.45  | 0.00089  | 20.09036 |
| P00736     | 0 | 1      | 924.7883 | 2772.35  | 1.27  | 0.00117  | 8.43507  |
| P00736     | 0 | 1      | 906.4727 | 1811.938 | 2.13  | 0.00193  | 0        |
| P00736     | 0 | 1      | 604.6511 | 1811.939 | 2.39  | 0.00144  | 3.331318 |
| P00736     | 0 | 1      | 606.327  | 1816.967 | 2.6   | 0.00158  | 0.160225 |
| P00736     | 0 | 0.9615 | 454.9956 | 1816.961 | -0.6  | -0.00027 | 6.288332 |
| P00736     | 0 | 1      | 826.6499 | 3303.578 | 1.7   | 0.0014   | 2.62586  |
| P00736     | 0 | 1      | 708.0069 | 2122.006 | 1.4   | 0.00099  | 2.711348 |
| P00736     | 0 | 1      | 708.0074 | 2122.008 | 2.09  | 0.00148  | 33.77083 |
| P00736     | 0 | 0.975  | 757.3685 | 3026.452 | 2.1   | 0.00159  | 20.5592  |
| P00736     | 0 | 1      | 1009.489 | 3026.452 | 2.1   | 0.00212  | 2.933997 |
| P00736     | 0 | 1      | 924.7891 | 2772.353 | 2.13  | 0.00197  | 12.56448 |
| P00736     | 0 | 0.9322 | 693.8444 | 2772.356 | 3.14  | 0.00217  | 7.017009 |
| P00736     | 1 | 1      | 500.9468 | 1500.826 | 3.55  | 0.00178  | 73.07345 |
| P00736     | 0 | 1      | 649.9982 | 1947.98  | 1.6   | 0.00104  | 15.28736 |
| P00736     | 0 | 1      | 649.9985 | 1947.981 | 2.07  | 0.00135  | 21.4896  |
| Q9NZP8; PC | 0 | 0.6491 | 480.274  | 959.5408 | 1.78  | 0.00085  | 8.877599 |
| P00736     | 0 | 0.9318 | 617.9724 | 1851.903 | 2.64  | 0.00163  | 6.600594 |
| P00736     | 0 | 0.898  | 653.3421 | 1305.677 | 1.38  | 0.0009   | 46.35346 |
| P00736     | 0 | 0.8429 | 800.0894 | 2398.254 | 0.5   | 0.0004   | 0        |
| P00736     | 0 | 0.9783 | 715.69   | 2145.055 | 1.39  | 0.001    | 5.288332 |
| P00736     | 0 | 1      | 568.0043 | 1701.998 | 3.08  | 0.00175  | 14.89096 |
| P00736     | 0 | 0.9434 | 568.0041 | 1701.998 | 2.76  | 0.00156  | 11.80002 |
| P00736     | 0 | 0.8485 | 715.6907 | 2145.057 | 2.33  | 0.00167  | 8.851177 |
| P00736     | 0 | 0.5581 | 535.3534 | 1069.7   | 2.18  | 0.00117  | 12.6987  |
| P00736     | 0 | 0.9394 | 522.9417 | 1566.81  | 1.79  | 0.00094  | 14.56185 |
| P00736     | 0 | 1      | 604.6517 | 1811.941 | 3.5   | 0.00212  | 12.41443 |
| P00736     | 0 | 0.625  | 719.4215 | 1437.836 | 0.85  | 0.00061  | 13.78449 |
| P00736     | 0 | 0.8947 | 562.3063 | 1123.605 | 2.37  | 0.00133  | 100      |
| P00736     | 0 | 1      | 708.0064 | 2122.004 | 0.62  | 0.00044  | 6.306197 |
| P00736     | 0 | 0.64   | 506.298  | 1011.589 | 4.41  | 0.00223  | 19.29176 |
| P00736     | 0 | 0.6    | 404.8818 | 1212.631 | 1.87  | 0.00076  | 13.69727 |
| P00736     | 0 | 1      | 568.0045 | 1701.999 | 3.51  | 0.00199  | 9.614187 |
| P00736     | 0 | 1      | 558.8004 | 1116.594 | 1.55  | 0.00087  | 0        |

|        |   |        |          |          |       |          |          |
|--------|---|--------|----------|----------|-------|----------|----------|
| P00736 | 0 | 0.6667 | 653.341  | 1305.675 | -0.3  | -0.00019 | 32.8207  |
| P00736 | 0 | 0.875  | 568.0026 | 1701.993 | 0.07  | 0.00004  | 20.91151 |
| P02649 | 0 | 1      | 547.9735 | 1641.906 | 1.07  | 0.00058  | 63.88305 |
| P02649 | 0 | 1      | 484.7795 | 968.5518 | -0.57 | -0.00028 | 0        |
| P02649 | 0 | 1      | 768.8624 | 1536.717 | 1.51  | 0.00116  | 0.67405  |
| P02649 | 0 | 0.9882 | 768.8618 | 1536.716 | 0.71  | 0.00055  | 0        |
| P02649 | 0 | 0.8916 | 597.974  | 1791.907 | 2.63  | 0.00157  | 5.035113 |
| P02649 | 0 | 0.9643 | 896.4563 | 1791.905 | 1.45  | 0.0013   | 3.264533 |
| P02649 | 0 | 0.9841 | 597.9753 | 1791.911 | 4.78  | 0.00286  | 58.71581 |
| P02649 | 0 | 0.7347 | 589.3262 | 1177.645 | 0.52  | 0.0003   | 3.096913 |
| P02649 | 0 | 0.9278 | 547.9735 | 1641.906 | 1.07  | 0.00058  | 4.750529 |
| P02649 | 0 | 1      | 821.4564 | 1641.906 | 0.93  | 0.00076  | 3.390358 |
| P02649 | 0 | 0.5741 | 609.8599 | 1218.712 | 3.27  | 0.00199  | 7.322783 |
| P02649 | 0 | 0.6667 | 609.8588 | 1218.71  | 1.56  | 0.00095  | 6.276953 |
| P02649 | 0 | 0.5918 | 546.8189 | 1092.63  | 2.03  | 0.00111  | 11.00255 |
| P02649 | 0 | 0.9324 | 547.9738 | 1641.907 | 1.74  | 0.00095  | 6.992116 |
| P02649 | 0 | 0.7937 | 517.2755 | 1033.544 | 1.07  | 0.00055  | 3.209466 |
| P02649 | 0 | 1      | 840.9127 | 1680.818 | 0.57  | 0.00048  | 2.619284 |
| P02649 | 0 | 1      | 560.9453 | 1680.821 | 2.49  | 0.00139  | 4.330383 |
| P02649 | 0 | 0.9907 | 910.8026 | 2730.393 | -0.5  | -0.00045 | 2.133987 |
| P02649 | 1 | 1      | 534.6459 | 1601.923 | 1.09  | 0.00058  | 9.328854 |
| P02649 | 0 | 1      | 611.7642 | 1222.521 | 1.7   | 0.00104  | 21.93635 |
| P02649 | 0 | 0.875  | 613.8236 | 1226.64  | 2.97  | 0.00182  | 5.634383 |
| P02649 | 0 | 0.8511 | 865.9273 | 1730.847 | 1.76  | 0.00152  | 0        |
| P02649 | 0 | 0.9796 | 625.6551 | 1874.951 | 2.32  | 0.00145  | 2.649611 |
| P02649 | 0 | 0.9663 | 937.9768 | 1874.946 | -0.08 | -0.00007 | 3.215361 |
| P02649 | 0 | 1      | 625.654  | 1874.947 | 0.57  | 0.00035  | 4.418406 |
| P02649 | 0 | 0.9355 | 625.655  | 1874.951 | 2.23  | 0.00139  | 59.07252 |
| P02649 | 0 | 1      | 603.3046 | 1807.899 | 0.93  | 0.00056  | 6.62564  |
| P02649 | 0 | 0.875  | 603.3054 | 1807.902 | 2.15  | 0.0013   | 0        |
| P02649 | 0 | 0.5472 | 546.7943 | 1092.581 | 3.4   | 0.00186  | 13.48895 |
| P02649 | 0 | 1      | 588.973  | 1764.904 | 2.63  | 0.00155  | 36.52353 |
| P02649 | 0 | 0.9318 | 696.3443 | 1391.681 | 2.1   | 0.00146  | 3.893229 |
| P02649 | 0 | 1      | 696.3441 | 1391.681 | 1.75  | 0.00122  | 3.123729 |
| P02649 | 0 | 0.875  | 557.7978 | 1114.588 | 2.86  | 0.0016   | 14.03979 |
| P02649 | 0 | 0.9302 | 590.6411 | 1769.909 | 2.83  | 0.00167  | 3.302549 |
| P02649 | 0 | 0.8936 | 885.4562 | 1769.905 | 0.74  | 0.00065  | 4.67049  |
| P02649 | 0 | 1      | 885.4563 | 1769.905 | 0.88  | 0.00078  | 1.521629 |
| P02649 | 0 | 0.52   | 546.7936 | 1092.58  | 2.28  | 0.00124  | 0        |
| P02649 | 1 | 0.7736 | 533.7425 | 1066.478 | 0.83  | 0.00044  | 0        |
| P02649 | 1 | 0.5417 | 388.2279 | 1162.669 | 1.78  | 0.00069  | 9.694468 |
| P02649 | 1 | 0.225  | 453.6012 | 1358.789 | 1.33  | 0.0006   | 4.996053 |
| P02649 | 0 | 0.9512 | 937.9791 | 1874.951 | 2.4   | 0.00225  | 3.426371 |
| P02649 | 1 | 0.56   | 388.2278 | 1162.669 | 1.47  | 0.00057  | 6.137087 |
| P02649 | 0 | 1      | 461.5438 | 1382.617 | 0.62  | 0.00029  | 27.8215  |
| P02649 | 1 | 1      | 501.6345 | 1502.889 | -0.24 | -0.00012 | 26.98673 |
| P02649 | 1 | 0.8235 | 401.2363 | 1601.923 | 1.2   | 0.00048  | 18.01991 |
| P02649 | 0 | 0.8537 | 393.2204 | 1177.647 | 1.83  | 0.00072  | 17.36686 |
| P02649 | 1 | 0.08   | 486.6118 | 1457.821 | 1.13  | 0.00055  | 9.721794 |
| P02649 | 0 | 0.9388 | 556.8325 | 1112.658 | 2.9   | 0.00161  | 4.814276 |
| P02649 | 0 | 0.6923 | 406.908  | 1218.709 | 0.7   | 0.00028  | 2.565988 |
| P02649 | 0 | 0.6792 | 474.7669 | 948.5264 | 0.29  | 0.00014  | 5.1737   |



|        |   |        |          |          |       |          |          |
|--------|---|--------|----------|----------|-------|----------|----------|
| P02649 | 0 | 0.5    | 546.7932 | 1092.579 | 1.5   | 0.00082  | 4.18807  |
| P02649 | 1 | 0.5714 | 388.2277 | 1162.669 | 1.31  | 0.00051  | 5.419596 |
| P02649 | 0 | 0.8125 | 621.8214 | 1242.635 | 3.39  | 0.00211  | 7.383902 |
| P02649 | 0 | 0.5714 | 406.9083 | 1218.71  | 1.6   | 0.00065  | 7.570036 |
| P02649 | 0 | 0.7143 | 515.7924 | 1030.577 | 1.23  | 0.00064  | 17.74095 |
| P02649 | 0 | 0.8571 | 629.8491 | 1258.691 | 2.91  | 0.00183  | 3.85592  |
| P02649 | 0 | 1      | 624.2932 | 1247.579 | 2.25  | 0.00141  | 8.483586 |
| P02649 | 0 | 0.9216 | 420.2348 | 1258.69  | 2.2   | 0.00092  | 8.112217 |
| P02649 | 1 | 0.8529 | 408.5794 | 1223.724 | 1.39  | 0.00056  | 28.66732 |
| P02649 | 0 | 0.9583 | 556.8312 | 1112.655 | 0.7   | 0.00039  | 2.878149 |
| P02649 | 0 | 1      | 749.406  | 1497.805 | 1.84  | 0.00138  | 0        |
| P02649 | 0 | 0.4583 | 546.7935 | 1092.58  | 1.94  | 0.00106  | 8.693021 |
| P02649 | 0 | 1      | 556.8323 | 1112.657 | 2.57  | 0.00143  | 14.15296 |
| P02649 | 0 | 0.8485 | 577.6211 | 1730.849 | 2.56  | 0.00148  | 0        |
| P02649 | 0 | 0.413  | 546.7932 | 1092.579 | 1.5   | 0.00082  | 5.677302 |
| P02649 | 1 | 0.55   | 388.2274 | 1162.668 | 0.44  | 0.00017  | 21.55532 |
| P02649 | 0 | 0.8065 | 414.8829 | 1242.634 | 2.45  | 0.00101  | 41.44863 |
| P02649 | 0 | 1      | 464.5653 | 1391.681 | 2.2   | 0.00102  | 44.11714 |
| P02649 | 0 | 0.9167 | 590.6408 | 1769.908 | 2.32  | 0.00137  | 0        |
| P02649 | 0 | 0.6444 | 474.7673 | 948.5273 | 1.25  | 0.00059  | 24.47377 |
| P02649 | 0 | 0.6389 | 546.7936 | 1092.58  | 2.28  | 0.00124  | 16.5644  |
| P02649 | 0 | 1      | 414.8838 | 1242.637 | 4.51  | 0.00187  | 10.56003 |
| P02649 | 0 | 0.6389 | 546.7924 | 1092.577 | -0.07 | -0.00004 | 6.913381 |
| P02649 | 0 | 0.8776 | 621.8213 | 1242.635 | 3.3   | 0.00205  | 9.90283  |
| P02649 | 0 | 1      | 625.6552 | 1874.951 | 2.42  | 0.00151  | 54.70777 |
| P02649 | 0 | 0.7    | 515.7929 | 1030.578 | 2.18  | 0.00112  | 31.20235 |
| P02649 | 0 | 1      | 821.4567 | 1641.906 | 1.22  | 0.001    | 27.65627 |
| P06681 | 0 | 1      | 410.5077 | 1639.009 | 1.99  | 0.00082  | 13.50525 |
| P06681 | 0 | 1      | 410.5081 | 1639.01  | 2.96  | 0.00121  | 26.47408 |
| P06681 | 0 | 1      | 547.0085 | 1639.011 | 3.27  | 0.00179  | 11.1284  |
| P06681 | 0 | 0.8421 | 402.5571 | 1205.657 | 1.57  | 0.00063  | 5.090429 |
| P06681 | 0 | 1      | 710.0172 | 2128.037 | 3.58  | 0.00254  | 32.14403 |
| P06681 | 1 | 1      | 930.692  | 3719.746 | 1.48  | 0.00138  | 1.808168 |
| P06681 | 0 | 1      | 547.0082 | 1639.01  | 2.71  | 0.00148  | 10.98159 |
| P06681 | 0 | 0.8889 | 684.9292 | 1368.851 | 4.26  | 0.00291  | 0        |
| P06681 | 0 | 0.9315 | 456.9541 | 1368.848 | 1.73  | 0.00079  | 12.28759 |
| P06681 | 0 | 1      | 456.9535 | 1368.846 | 0.39  | 0.00018  | 32.97034 |
| P06681 | 0 | 0.942  | 456.9542 | 1368.848 | 2.06  | 0.00094  | 11.08633 |
| P06681 | 0 | 0.7377 | 513.633  | 1538.884 | 1.53  | 0.00079  | 13.54907 |
| P06681 | 0 | 0.6545 | 769.9462 | 1538.885 | 1.94  | 0.00149  | 10.96665 |
| P06681 | 0 | 0.9333 | 456.9539 | 1368.847 | 1.26  | 0.00057  | 9.532727 |
| P06681 | 1 | 0.8974 | 790.4546 | 2369.349 | 2.18  | 0.00172  | 15.72494 |
| P06681 | 0 | 1      | 1049.081 | 2097.155 | 3.96  | 0.00415  | 3.882048 |
| P06681 | 0 | 1      | 699.7224 | 2097.153 | 2.61  | 0.00183  | 5.941878 |
| P06681 | 1 | 0.8889 | 629.0203 | 1885.046 | 2.26  | 0.00142  | 7.991782 |
| P06681 | 0 | 1      | 873.0729 | 2617.204 | 1.63  | 0.00142  | 4.471851 |
| P06681 | 0 | 0.8857 | 655.058  | 2617.21  | 3.86  | 0.00253  | 12.95572 |
| P06681 | 0 | 0.9706 | 467.253  | 1399.744 | 1.76  | 0.00082  | 9.149958 |
| P06681 | 0 | 1      | 700.3761 | 1399.745 | 2.12  | 0.00148  | 13.18542 |
| P06681 | 0 | 0.4921 | 589.3399 | 1177.673 | 4.98  | 0.00293  | 4.395614 |
| P06681 | 0 | 1      | 415.2036 | 1243.596 | 2.15  | 0.00089  | 13.71723 |
| P06681 | 0 | 0.9074 | 710.3599 | 1419.713 | 2.02  | 0.00144  | 2.862124 |

|        |   |        |          |          |       |          |          |
|--------|---|--------|----------|----------|-------|----------|----------|
| P06681 | 0 | 0.8966 | 473.909  | 1419.712 | 1.93  | 0.00091  | 17.3086  |
| P06681 | 0 | 1      | 648.0213 | 1942.049 | 1.8   | 0.00116  | 18.31386 |
| P06681 | 0 | 0.9429 | 486.2678 | 1942.049 | 1.85  | 0.0009   | 8.118219 |
| P06681 | 0 | 1      | 486.2679 | 1942.05  | 1.91  | 0.00093  | 0        |
| P06681 | 0 | 1      | 696.3769 | 1391.747 | 2.3   | 0.0016   | 12.51025 |
| P06681 | 0 | 1      | 882.7937 | 2646.367 | 1.4   | 0.00124  | 17.86039 |
| P06681 | 0 | 1      | 410.5084 | 1639.012 | 3.85  | 0.00158  | 5.635686 |
| P06681 | 0 | 0.9302 | 633.3363 | 1265.665 | 3.72  | 0.00235  | 26.21051 |
| P06681 | 0 | 0.6111 | 513.6334 | 1538.886 | 2.36  | 0.00121  | 0        |
| P06681 | 0 | 0.9677 | 415.2033 | 1243.595 | 1.49  | 0.00062  | 9.01186  |
| P06681 | 0 | 0.6333 | 454.2666 | 1360.785 | 1.94  | 0.00088  | 19.38161 |
| P06681 | 0 | 1      | 408.92   | 1224.746 | 1.91  | 0.00078  | 29.35849 |
| P06681 | 0 | 0.6207 | 402.557  | 1205.657 | 1.5   | 0.0006   | 12.21969 |
| P06681 | 0 | 0.88   | 547.0072 | 1639.007 | 0.92  | 0.0005   | 12.62806 |
| P06681 | 0 | 1      | 533.2835 | 1065.56  | -0.33 | -0.00018 | 33.82913 |
| P06681 | 0 | 1      | 464.5863 | 1391.744 | 0.75  | 0.00035  | 7.04821  |
| P06681 | 0 | 0.9149 | 628.3271 | 1255.647 | 5.58  | 0.0035   | 54.97927 |
| P06681 | 0 | 1      | 467.2515 | 1399.74  | -1.38 | -0.00064 | 30.97646 |
| P06681 | 0 | 0.7778 | 450.2425 | 1797.948 | 2.35  | 0.00105  | 0        |
| P06681 | 0 | 0.5    | 454.2662 | 1360.784 | 1     | 0.00045  |          |
| P06681 | 0 | 1      | 467.2512 | 1399.739 | -2.03 | -0.00095 | 49.61073 |
| P06681 | 0 | 0.5    | 454.2658 | 1360.783 | -0.01 | 0        | 0        |
| P06681 | 0 | 1      | 410.5083 | 1639.011 | 3.48  | 0.00143  | 14.3905  |
| P06681 | 0 | 0.2727 | 630.3826 | 1259.758 | 1.36  | 0.00086  | 32.51718 |
| P06681 | 0 | 0.8125 | 684.9275 | 1368.848 | 1.76  | 0.0012   | 22.25535 |
| P06681 | 0 | 0.963  | 456.9551 | 1368.851 | 3.87  | 0.00176  | 78.72992 |
| P06681 | 0 | 0.56   | 454.2658 | 1360.783 | 0.06  | 0.00003  | 56.19683 |
| P06681 | 0 | 0.5769 | 422.5588 | 1265.662 | 1.05  | 0.00044  | 27.49483 |
| P06681 | 0 | 1      | 498.9729 | 1494.904 | 0.51  | 0.00025  | 5.977794 |
| P06681 | 0 | 0.7647 | 668.0067 | 2002.005 | 0.64  | 0.00043  | 14.67508 |
| P06681 | 0 | 0.6818 | 668.0075 | 2002.008 | 1.83  | 0.00122  | 2.961311 |
| P06681 | 0 | 1      | 624.3258 | 1247.644 | 2.47  | 0.00154  | 0        |
| P06681 | 0 | 1      | 456.9544 | 1368.848 | 2.33  | 0.00106  | 60.27592 |
| P06681 | 0 | 0.5556 | 680.8964 | 1360.785 | 2.02  | 0.00138  | 5.173426 |
| P06681 | 0 | 0.9    | 668.0084 | 2002.011 | 3.2   | 0.00214  | 14.82103 |
| P06681 | 0 | 1      | 415.2034 | 1243.596 | 1.71  | 0.00071  | 25.58758 |
| P06681 | 0 | 0.9667 | 603.333  | 1205.659 | 3.31  | 0.00199  | 38.30157 |
| P06681 | 0 | 1      | 873.0741 | 2617.208 | 2.96  | 0.00258  | 8.958677 |
| P06681 | 0 | 0.35   | 769.9434 | 1538.88  | -1.63 | -0.00126 | 52.37825 |
| P12259 | 0 | 0.8    | 823.4912 | 1645.975 | 1.5   | 0.00123  | 3.613659 |
| P12259 | 0 | 0.9    | 549.3309 | 1645.978 | 3.27  | 0.00179  | 21.20807 |
| P12259 | 0 | 1      | 430.759  | 1720.014 | 2.04  | 0.00088  | 16.85813 |
| P12259 | 0 | 0.9545 | 728.3827 | 2183.134 | 5.16  | 0.00375  | 6.97278  |
| P12259 | 0 | 1      | 464.9432 | 1392.815 | 2     | 0.00093  | 0        |
| P12259 | 0 | 0.8393 | 614.0092 | 1840.013 | 2.49  | 0.00153  | 9.785065 |
| P12259 | 0 | 0.7955 | 427.2419 | 1279.711 | 1.32  | 0.00056  | 18.57211 |
| P12259 | 0 | 0.907  | 674.8799 | 1348.753 | 2.39  | 0.00161  | 6.708357 |
| P12259 | 0 | 1      | 758.6854 | 2274.042 | 1.24  | 0.00094  | 4.256592 |
| P12259 | 0 | 1      | 758.6852 | 2274.041 | 1.08  | 0.00082  | 0        |
| P12259 | 0 | 0.875  | 449.8819 | 1347.631 | 1.12  | 0.0005   | 55.14321 |
| P12259 | 1 | 1      | 555.6758 | 1665.013 | 2.2   | 0.00122  | 7.646373 |
| P12259 | 0 | 1      | 613.8669 | 1226.727 | 3.35  | 0.00206  | 12.79606 |

|        |   |        |          |          |       |          |          |
|--------|---|--------|----------|----------|-------|----------|----------|
| P12259 | 1 | 0.8125 | 527.9365 | 1581.795 | 1.06  | 0.00056  | 23.79537 |
| P12259 | 0 | 1      | 464.9422 | 1392.812 | -0.1  | -0.00005 | 27.47878 |
| P12259 | 0 | 0.9091 | 538.2697 | 1075.532 | -0.21 | -0.00011 | 39.1588  |
| P12259 | 0 | 0.9062 | 568.9397 | 1704.805 | 2.94  | 0.00167  | 0        |
| P12259 | 0 | 0.7778 | 561.3566 | 1121.706 | 2.26  | 0.00127  | 0        |
| P12259 | 0 | 0.7429 | 464.8075 | 928.6078 | 1.9   | 0.00088  | 25.38149 |
| P12259 | 0 | 0.6111 | 516.9608 | 1548.868 | 3.54  | 0.00183  | 43.93911 |
| P12259 | 1 | 1      | 553.965  | 1659.881 | 2.9   | 0.0016   | 45.93683 |
| P12259 | 0 | 1      | 475.9036 | 1425.696 | 2.74  | 0.0013   | 18.40945 |
| P12259 | 0 | 0.9375 | 592.6467 | 1775.926 | -1.25 | -0.00074 | 0        |
| P12259 | 0 | 1      | 614.0098 | 1840.015 | 3.49  | 0.00214  | 7.862066 |
| P12259 | 0 | 0.8372 | 542.3018 | 1083.596 | 0.51  | 0.00028  | 39.81616 |
| P12259 | 0 | 0.4583 | 501.9313 | 1503.779 | 3.16  | 0.00158  | 39.90562 |
| P02790 | 0 | 1      | 619.6309 | 1856.878 | 3.47  | 0.00215  | 0        |
| P02790 | 0 | 1      | 619.6306 | 1856.877 | 2.88  | 0.00178  | 11.39527 |
| P02790 | 0 | 0.9123 | 928.9419 | 1856.877 | 2.56  | 0.00238  | 0.986027 |
| P02790 | 0 | 1      | 748.3444 | 1495.681 | 1.84  | 0.00137  | 3.297979 |
| P02790 | 0 | 0.7714 | 661.3364 | 1981.995 | 2.97  | 0.00196  | 0        |
| P02790 | 0 | 0.7561 | 661.3356 | 1981.992 | 1.68  | 0.00111  | 4.924888 |
| P02790 | 0 | 0.75   | 477.6185 | 1430.841 | 3.6   | 0.00172  | 20.96952 |
| P02790 | 0 | 0.8382 | 643.8718 | 1286.736 | 1.96  | 0.00126  | 2.749575 |
| P02790 | 0 | 0.8525 | 715.9226 | 1430.838 | 1.5   | 0.00107  | 6.445424 |
| P02790 | 0 | 0.7609 | 477.6169 | 1430.836 | 0.15  | 0.00007  | 10.08243 |
| P02790 | 0 | 0.8167 | 715.9226 | 1430.838 | 1.5   | 0.00107  | 5.399431 |
| P02790 | 0 | 0.8116 | 643.872  | 1286.737 | 2.34  | 0.00151  | 0        |
| P02790 | 0 | 0.8364 | 477.6177 | 1430.838 | 1.87  | 0.00089  | 8.381349 |
| P02790 | 0 | 0.9744 | 619.6303 | 1856.876 | 2.49  | 0.00154  | 8.118405 |
| P02790 | 0 | 1      | 856.8897 | 1712.772 | 1.43  | 0.00122  | 0        |
| P02790 | 0 | 0.9839 | 619.6305 | 1856.877 | 2.78  | 0.00172  | 0        |
| P02790 | 0 | 0.9831 | 619.6304 | 1856.877 | 2.68  | 0.00166  | 3.010022 |
| P02790 | 0 | 1      | 928.9409 | 1856.874 | 1.44  | 0.00134  | 11.41802 |
| P02790 | 0 | 1      | 619.6305 | 1856.877 | 2.78  | 0.00172  | 27.65837 |
| P02790 | 0 | 1      | 928.9413 | 1856.875 | 1.9   | 0.00177  | 3.730076 |
| P02790 | 0 | 1      | 619.6302 | 1856.876 | 2.29  | 0.00142  | 5.1441   |
| P02790 | 0 | 1      | 928.941  | 1856.875 | 1.57  | 0.00146  | 3.205738 |
| P02790 | 0 | 1      | 619.6296 | 1856.874 | 1.3   | 0.00081  | 3.943996 |
| P02790 | 0 | 1      | 856.8898 | 1712.772 | 1.57  | 0.00135  | 0        |
| P02790 | 0 | 1      | 928.9392 | 1856.871 | -0.4  | -0.00037 | 3.468973 |
| P02790 | 0 | 1      | 619.629  | 1856.872 | 0.32  | 0.0002   | 3.844419 |
| P02790 | 0 | 1      | 928.9415 | 1856.876 | 2.1   | 0.00195  | 20.42489 |
| P02790 | 0 | 0.9796 | 619.6278 | 1856.869 | -1.56 | -0.00096 | 0        |
| P02790 | 0 | 1      | 619.6296 | 1856.874 | 1.4   | 0.00087  | 51.68941 |
| P02790 | 0 | 0.9811 | 928.9406 | 1856.874 | 1.11  | 0.00103  | 0        |
| P02790 | 0 | 0.6136 | 477.2701 | 1429.796 | 1.87  | 0.00089  | 16.11522 |
| P02790 | 0 | 0.8125 | 715.4013 | 1429.795 | 1.68  | 0.0012   | 6.416716 |
| P02790 | 0 | 0.7755 | 477.2695 | 1429.794 | 0.78  | 0.00037  | 9.378213 |
| P02790 | 0 | 0.85   | 715.4006 | 1429.794 | 0.66  | 0.00047  | 6.504476 |
| P02790 | 0 | 0.6731 | 477.2692 | 1429.793 | 0.07  | 0.00004  | 8.007553 |
| P02790 | 0 | 0.6364 | 477.2698 | 1429.795 | 1.36  | 0.00065  | 14.97369 |
| P02790 | 0 | 0.8167 | 715.4021 | 1429.797 | 2.79  | 0.002    | 1.351329 |
| P02790 | 0 | 0.9756 | 619.6297 | 1856.875 | 1.5   | 0.00093  | 52.51019 |
| P02790 | 0 | 1      | 881.4582 | 2642.36  | 8.92  | 0.00785  | 12.94534 |

|        |   |        |          |          |       |          |          |
|--------|---|--------|----------|----------|-------|----------|----------|
| P02790 | 0 | 1      | 836.7625 | 2508.273 | 2.19  | 0.00183  | 12.52815 |
| P02790 | 0 | 1      | 881.4507 | 2642.338 | 0.46  | 0.00041  | 37.1097  |
| P02790 | 0 | 1      | 788.7272 | 2364.167 | 0.8   | 0.00063  | 5.414624 |
| P02790 | 0 | 0.9867 | 881.4523 | 2642.342 | 2.19  | 0.00193  | 11.92839 |
| P02790 | 0 | 1      | 788.7276 | 2364.168 | 1.27  | 0.001    | 16.30295 |
| P02790 | 0 | 1      | 881.4545 | 2642.349 | 4.76  | 0.00419  | 0        |
| P02790 | 0 | 0.8889 | 881.4556 | 2642.352 | 5.94  | 0.00523  | 16.09009 |
| P02790 | 0 | 1      | 788.7268 | 2364.166 | 0.26  | 0.0002   | 5.961622 |
| P02790 | 0 | 0.9559 | 881.4538 | 2642.347 | 3.93  | 0.00346  | 26.74925 |
| P02790 | 0 | 1      | 881.4539 | 2642.347 | 4     | 0.00352  | 7.547066 |
| P02790 | 0 | 1      | 661.3407 | 2642.341 | 1.7   | 0.00113  | 2.296825 |
| P02790 | 0 | 0.9623 | 661.3396 | 2642.337 | 0.04  | 0.00003  | 6.085531 |
| P02790 | 0 | 1      | 881.4528 | 2642.344 | 2.75  | 0.00242  | 0        |
| P02790 | 0 | 0.9444 | 833.4163 | 2498.234 | 0     | 0        | 3.577184 |
| P02790 | 0 | 1      | 881.4544 | 2642.348 | 4.55  | 0.00401  | 9.295702 |
| P02790 | 0 | 1      | 881.4535 | 2642.346 | 3.58  | 0.00315  | 0.963353 |
| P02790 | 0 | 0.9683 | 881.4548 | 2642.35  | 5.04  | 0.00443  | 12.44493 |
| P02790 | 0 | 0.875  | 596.969  | 1788.892 | 3.09  | 0.00184  | 10.15062 |
| P02790 | 0 | 1      | 1254.638 | 2508.269 | 0.71  | 0.00089  | 0        |
| P02790 | 0 | 1      | 627.8233 | 2508.271 | 1.62  | 0.00102  | 2.070103 |
| P02790 | 0 | 1      | 1254.639 | 2508.271 | 1.29  | 0.00162  | 0.593852 |
| P02790 | 0 | 1      | 836.7606 | 2508.267 | -0.08 | -0.00007 | 2.472323 |
| P02790 | 0 | 1      | 627.823  | 2508.27  | 1.13  | 0.00071  | 2.384292 |
| P02790 | 0 | 1      | 836.762  | 2508.272 | 1.67  | 0.0014   | 6.247859 |
| P02790 | 0 | 1      | 836.7606 | 2508.267 | 0     | 0        | 2.162766 |
| P02790 | 0 | 1      | 836.7606 | 2508.267 | -0.08 | -0.00007 | 2.263237 |
| P02790 | 0 | 1      | 877.6769 | 3507.686 | 3.15  | 0.00276  | 20.54631 |
| P02790 | 0 | 1      | 627.8232 | 2508.271 | 1.52  | 0.00095  | 2.410218 |
| P02790 | 0 | 1      | 1254.639 | 2508.271 | 1.58  | 0.00198  | 2.55822  |
| P02790 | 0 | 0.9737 | 881.4526 | 2642.343 | 2.54  | 0.00224  | 7.15334  |
| P02790 | 0 | 0.8148 | 894.95   | 1788.893 | 3.2   | 0.00286  | 0        |
| P02790 | 0 | 0.9783 | 881.4563 | 2642.354 | 6.77  | 0.00596  | 40.10157 |
| P02790 | 0 | 0.9189 | 881.456  | 2642.353 | 6.42  | 0.00566  | 32.00636 |
| P02790 | 0 | 0.7451 | 477.6181 | 1430.84  | 2.7   | 0.00129  | 14.96517 |
| P02790 | 0 | 0.8148 | 477.6175 | 1430.838 | 1.42  | 0.00068  | 18.02268 |
| P02790 | 0 | 1      | 833.4177 | 2498.239 | 1.69  | 0.00141  | 0        |
| P02790 | 0 | 1      | 881.452  | 2642.342 | 1.92  | 0.00169  | 1.299401 |
| P02790 | 0 | 0.9    | 661.3415 | 2642.344 | 2.9   | 0.00192  | 2.895188 |
| P02790 | 0 | 0.9733 | 881.4523 | 2642.342 | 2.19  | 0.00193  | 2.08516  |
| P02790 | 0 | 0.9032 | 709.3702 | 2126.096 | 2.39  | 0.00169  | 5.0551   |
| P02790 | 0 | 0.907  | 532.2791 | 2126.094 | 1.64  | 0.00087  | 9.921781 |
| P02790 | 0 | 0.9231 | 532.279  | 2126.094 | 1.52  | 0.00081  | 0        |
| P02790 | 0 | 1      | 820.3936 | 1639.78  | -0.49 | -0.0004  | 3.125367 |
| P02790 | 0 | 1      | 547.2662 | 1639.784 | 1.96  | 0.00107  | 23.6427  |
| P02790 | 0 | 1      | 820.3953 | 1639.783 | 1.52  | 0.00125  | 3.587369 |
| P02790 | 0 | 1      | 547.2653 | 1639.781 | 0.4   | 0.00022  | 6.6714   |
| P02790 | 0 | 1      | 881.4582 | 2642.36  | 8.92  | 0.00785  | 18.69551 |
| P02790 | 0 | 0.9722 | 661.3387 | 2642.333 | -1.35 | -0.00089 | 6.004994 |
| P02790 | 0 | 1      | 881.4525 | 2642.343 | 2.4   | 0.00212  | 3.038657 |
| P02790 | 0 | 0.8919 | 893.4361 | 3570.723 | -0.28 | -0.00025 | 0        |
| P02790 | 0 | 1      | 661.34   | 2642.338 | 0.59  | 0.00039  | 2.249806 |
| P02790 | 0 | 1      | 881.4503 | 2642.336 | -0.09 | -0.00008 | 2.252324 |

|        |   |        |          |          |       |          |          |
|--------|---|--------|----------|----------|-------|----------|----------|
| P02790 | 0 | 1      | 1321.674 | 2642.34  | 1.3   | 0.00171  | 3.218996 |
| P02790 | 0 | 1      | 661.3404 | 2642.34  | 1.24  | 0.00082  | 2.291156 |
| P02790 | 0 | 1      | 881.4506 | 2642.337 | 0.25  | 0.00022  | 2.101504 |
| P02790 | 0 | 0.9091 | 532.2801 | 2126.099 | 3.59  | 0.00191  | 4.461025 |
| P02790 | 0 | 0.974  | 1063.551 | 2126.096 | 2.17  | 0.0023   | 0        |
| P02790 | 0 | 0.8478 | 496.253  | 1981.99  | 0.65  | 0.00032  | 5.877422 |
| P02790 | 0 | 0.9123 | 661.3356 | 1981.992 | 1.68  | 0.00111  | 15.5322  |
| P02790 | 0 | 0.9242 | 709.3687 | 2126.091 | 0.24  | 0.00017  | 4.61297  |
| P02790 | 0 | 0.9615 | 661.3356 | 1981.992 | 1.77  | 0.00117  | 7.369062 |
| P02790 | 0 | 1      | 532.2804 | 2126.1   | 4.16  | 0.00221  | 47.07515 |
| P02790 | 0 | 0.9375 | 709.3687 | 2126.092 | 0.32  | 0.00023  | 4.586155 |
| P02790 | 0 | 0.9167 | 661.334  | 1981.987 | -0.72 | -0.00048 | 6.218521 |
| P02790 | 0 | 0.9574 | 532.2791 | 2126.095 | 1.75  | 0.00093  | 5.106207 |
| P02790 | 0 | 0.8732 | 709.3699 | 2126.095 | 2.05  | 0.00145  | 12.23421 |
| P02790 | 0 | 0.8913 | 532.2788 | 2126.093 | 1.06  | 0.00057  | 5.081725 |
| P02790 | 0 | 0.9375 | 1063.552 | 2126.096 | 2.4   | 0.00255  | 0        |
| P02790 | 0 | 0.9315 | 709.3691 | 2126.093 | 0.84  | 0.0006   | 4.511355 |
| P02790 | 0 | 0.8854 | 814.9001 | 1628.793 | 1.82  | 0.00148  | 3.253555 |
| P02790 | 0 | 0.8974 | 532.2796 | 2126.097 | 2.67  | 0.00142  | 4.465581 |
| P02790 | 0 | 0.9077 | 1063.551 | 2126.095 | 1.94  | 0.00206  | 0        |
| P02790 | 0 | 1      | 455.5747 | 1364.71  | 1.28  | 0.00058  | 5.373659 |
| P02790 | 0 | 0.9677 | 682.8582 | 1364.709 | 0.82  | 0.00056  | 3.192588 |
| P02790 | 0 | 1      | 610.8079 | 1220.608 | 2.13  | 0.0013   | 0        |
| P02790 | 0 | 1      | 610.807  | 1220.607 | 0.63  | 0.00038  | 0.05162  |
| P02790 | 0 | 0.9683 | 682.8586 | 1364.71  | 1.45  | 0.00099  | 3.220432 |
| P02790 | 0 | 0.9242 | 682.8593 | 1364.711 | 2.52  | 0.00172  | 5.889195 |
| P02790 | 0 | 0.8889 | 682.8591 | 1364.711 | 2.25  | 0.00154  | 3.467011 |
| P02790 | 0 | 0.875  | 455.5751 | 1364.711 | 2.09  | 0.00095  | 4.505167 |
| P02790 | 0 | 0.7551 | 477.27   | 1429.795 | 1.74  | 0.00083  | 12.82662 |
| P02790 | 0 | 0.7385 | 715.4019 | 1429.797 | 2.54  | 0.00181  | 7.42549  |
| P02790 | 0 | 1      | 516.9294 | 1548.774 | 1.73  | 0.00089  | 42.04683 |
| P02790 | 0 | 0.6591 | 435.9205 | 1305.747 | 1.79  | 0.00078  | 0        |
| P02790 | 0 | 0.7857 | 702.3431 | 3507.687 | 3.34  | 0.00234  | 33.13522 |
| P02790 | 0 | 0.9474 | 877.6759 | 3507.682 | 1.97  | 0.00173  | 3.984314 |
| P02790 | 0 | 1      | 881.4567 | 2642.356 | 7.25  | 0.00639  | 26.98557 |
| P02790 | 0 | 1      | 836.7625 | 2508.273 | 2.26  | 0.00189  | 5.191063 |
| P02790 | 0 | 1      | 836.7622 | 2508.272 | 1.82  | 0.00152  | 22.10536 |
| P02790 | 0 | 1      | 788.7274 | 2364.168 | 1.03  | 0.00081  | 6.753419 |
| P02790 | 0 | 0.942  | 877.675  | 3507.678 | 0.92  | 0.00081  | 3.088639 |
| P02790 | 0 | 1      | 788.7271 | 2364.167 | 0.57  | 0.00045  | 0.146488 |
| P02790 | 0 | 0.9667 | 702.3418 | 3507.68  | 1.42  | 0.001    | 4.398482 |
| P02790 | 0 | 1      | 788.725  | 2364.161 | -1.99 | -0.00157 | 6.112413 |
| P02790 | 0 | 0.6531 | 877.6744 | 3507.676 | 0.23  | 0.0002   | 11.04581 |
| P02790 | 0 | 1      | 836.763  | 2508.274 | 2.84  | 0.00238  | 15.30525 |
| P02790 | 0 | 1      | 627.8238 | 2508.273 | 2.4   | 0.0015   | 0        |
| P02790 | 0 | 1      | 836.7622 | 2508.272 | 1.82  | 0.00152  | 2.725686 |
| P02790 | 0 | 1      | 836.7615 | 2508.27  | 1.02  | 0.00085  | 7.160137 |
| P02790 | 0 | 1      | 627.8237 | 2508.273 | 2.3   | 0.00144  | 2.590176 |
| P02790 | 0 | 1      | 836.7623 | 2508.272 | 1.97  | 0.00164  | 2.579544 |
| P02790 | 0 | 1      | 836.7624 | 2508.273 | 2.11  | 0.00177  | 11.04668 |
| P02790 | 0 | 1      | 627.8259 | 2508.282 | 5.71  | 0.00358  | 10.06347 |
| P02790 | 0 | 0.9765 | 881.4515 | 2642.34  | 1.36  | 0.0012   | 2.038263 |

|        |   |        |          |          |       |          |          |
|--------|---|--------|----------|----------|-------|----------|----------|
| P02790 | 2 | 1      | 809.9376 | 3236.728 | 1.14  | 0.00092  | 77.18871 |
| P02790 | 0 | 0.9623 | 661.3405 | 2642.34  | 1.43  | 0.00094  | 16.29011 |
| P02790 | 2 | 1      | 809.9376 | 3236.728 | 1.14  | 0.00092  | 77.18871 |
| P02790 | 0 | 0.973  | 881.452  | 2642.342 | 1.92  | 0.00169  | 2.1777   |
| P02790 | 0 | 1      | 659.3212 | 3292.577 | 1.7   | 0.00112  | 51.654   |
| P02790 | 0 | 1      | 687.4067 | 2060.205 | 1     | 0.00069  | 3.696815 |
| P02790 | 0 | 1      | 1030.608 | 2060.209 | 2.49  | 0.00257  | 0        |
| P02790 | 0 | 1      | 661.3413 | 2642.343 | 2.63  | 0.00174  | 5.358066 |
| P02790 | 0 | 0.5741 | 631.3828 | 1261.758 | 2.9   | 0.00183  | 18.94206 |
| P02790 | 0 | 1      | 836.762  | 2508.271 | 1.6   | 0.00134  | 8.311328 |
| P02790 | 0 | 0.8696 | 596.9689 | 1788.892 | 2.88  | 0.00172  | 9.381875 |
| P02790 | 0 | 0.7377 | 631.3829 | 1261.758 | 3     | 0.00189  | 13.57712 |
| P02790 | 0 | 0.5556 | 631.3826 | 1261.758 | 2.51  | 0.00158  | 26.15951 |
| P02790 | 0 | 0.7778 | 702.3413 | 3507.677 | 0.73  | 0.00051  | 6.197073 |
| P02790 | 0 | 0.9359 | 877.6748 | 3507.677 | 0.71  | 0.00063  | 4.171076 |
| P02790 | 0 | 0.9512 | 596.9683 | 1788.89  | 1.96  | 0.00117  | 12.11103 |
| P02790 | 1 | 1      | 608.3348 | 1822.99  | 3.13  | 0.0019   | 14.70978 |
| P02790 | 1 | 1      | 608.3348 | 1822.99  | 3.03  | 0.00184  | 20.55173 |
| P02790 | 0 | 1      | 547.2652 | 1639.781 | 0.17  | 0.00009  | 26.22812 |
| P02790 | 0 | 0.7879 | 655.8397 | 1310.672 | 2.68  | 0.00176  | 13.77399 |
| P02790 | 1 | 1      | 608.3342 | 1822.988 | 2.13  | 0.00129  | 8.693175 |
| P02790 | 0 | 0.84   | 655.8376 | 1310.668 | -0.58 | -0.00038 | 5.257352 |
| P02790 | 1 | 0.9783 | 560.3005 | 1678.887 | 2.9   | 0.00162  | 8.247183 |
| P02790 | 1 | 0.9783 | 560.3005 | 1678.887 | 2.9   | 0.00162  | 8.247183 |
| P02790 | 0 | 0.6515 | 643.351  | 1285.695 | 2.93  | 0.00188  | 16.66861 |
| P02790 | 0 | 1      | 836.7646 | 2508.279 | 4.74  | 0.00396  | 3.534253 |
| P02790 | 0 | 1      | 886.95   | 1772.893 | 0.43  | 0.00038  | 5.792911 |
| P02790 | 0 | 1      | 591.6365 | 1772.895 | 1.73  | 0.00102  | 8.111058 |
| P02790 | 0 | 1      | 886.9507 | 1772.894 | 1.25  | 0.00111  | 100      |
| P02790 | 0 | 0.9167 | 619.6317 | 1856.881 | 4.76  | 0.00294  | 10.44557 |
| P02790 | 0 | 0.9459 | 836.7592 | 2508.263 | -1.76 | -0.00147 | 5.125496 |
| P02790 | 0 | 1      | 928.9392 | 1856.871 | -0.33 | -0.00031 | 0        |
| P02790 | 0 | 0.975  | 774.8905 | 1548.774 | 1.81  | 0.0014   | 2.328142 |
| P02790 | 0 | 1      | 610.8088 | 1220.61  | 3.63  | 0.00221  | 0        |
| P02790 | 0 | 1      | 619.6301 | 1856.876 | 2.19  | 0.00136  | 5.682241 |
| P02790 | 0 | 0.8936 | 653.3774 | 1305.748 | 2.36  | 0.00154  | 6.496942 |
| P02790 | 0 | 0.9737 | 619.6301 | 1856.876 | 2.19  | 0.00136  | 5.828601 |
| P02790 | 0 | 0.7    | 437.5617 | 1310.67  | 1.32  | 0.00058  | 9.659534 |
| P02790 | 0 | 1      | 881.4524 | 2642.343 | 2.33  | 0.00205  | 75.46298 |
| P02790 | 0 | 1      | 643.7941 | 1286.581 | 2.36  | 0.00152  | 14.05585 |
| P02790 | 0 | 0.5902 | 631.3827 | 1261.758 | 2.71  | 0.00171  | 6.663101 |
| P02790 | 0 | 0.9833 | 591.7863 | 1182.565 | 3.15  | 0.00186  | 7.322608 |
| P02790 | 0 | 0.8    | 477.6177 | 1430.838 | 1.87  | 0.00089  | 15.00322 |
| P02790 | 1 | 0.5357 | 473.2918 | 1417.861 | 3.45  | 0.00163  | 2.276918 |
| P02790 | 0 | 0.9062 | 583.7886 | 1166.57  | 2.92  | 0.0017   | 6.038012 |
| P02790 | 0 | 0.6389 | 477.2701 | 1429.796 | 1.93  | 0.00092  | 48.99046 |
| P02790 | 0 | 0.7455 | 631.3826 | 1261.758 | 2.61  | 0.00165  | 22.1367  |
| P02790 | 0 | 0.8378 | 709.3705 | 2126.097 | 2.82  | 0.002    | 8.961815 |
| P02790 | 0 | 1      | 547.2653 | 1639.781 | 0.28  | 0.00015  | 39.89036 |
| P02790 | 0 | 1      | 836.7612 | 2508.269 | 0.65  | 0.00055  | 37.55566 |
| P02790 | 0 | 0.7105 | 477.2709 | 1429.798 | 3.6   | 0.00171  | 12.31586 |
| P02790 | 0 | 1      | 836.7631 | 2508.275 | 2.92  | 0.00244  | 7.317331 |

|        |   |        |          |          |       |          |          |
|--------|---|--------|----------|----------|-------|----------|----------|
| P02790 | 0 | 0.9211 | 881.4454 | 2642.322 | -5.57 | -0.0049  | 0        |
| P02790 | 0 | 1      | 434.8635 | 1302.576 | 2.38  | 0.00103  | 5.680776 |
| P02790 | 1 | 0.4    | 473.2902 | 1417.856 | 0.22  | 0.0001   | 7.874603 |
| P02790 | 0 | 0.7222 | 435.9208 | 1305.748 | 2.42  | 0.00105  | 4.18222  |
| P02790 | 0 | 1      | 643.7944 | 1286.581 | 2.83  | 0.00182  | 14.018   |
| P02790 | 0 | 0.8409 | 435.9207 | 1305.747 | 2.21  | 0.00096  | 9.81278  |
| P02790 | 0 | 0.7419 | 435.9211 | 1305.749 | 3.19  | 0.00139  | 55.32776 |
| P02790 | 0 | 1      | 619.6303 | 1856.876 | 2.39  | 0.00148  | 13.67699 |
| P02790 | 0 | 0.7742 | 619.6301 | 1856.876 | 2.09  | 0.0013   | 15.08523 |
| P02790 | 0 | 0.7619 | 682.8594 | 1364.712 | 2.7   | 0.00184  | 7.132895 |
| P02790 | 1 | 0.5    | 473.2912 | 1417.859 | 2.29  | 0.00108  | 0        |
| P02790 | 0 | 0.7143 | 715.4017 | 1429.796 | 2.2   | 0.00157  | 57.03716 |
| P02790 | 0 | 0.7391 | 477.6173 | 1430.837 | 1.04  | 0.0005   | 40.99088 |
| P02790 | 0 | 0.9688 | 596.9687 | 1788.892 | 2.58  | 0.00154  | 52.66348 |
| P02790 | 0 | 0.7593 | 631.3835 | 1261.76  | 3.96  | 0.0025   | 31.83052 |
| P02790 | 0 | 0.7297 | 715.4045 | 1429.802 | 6.12  | 0.00438  | 0        |
| P02790 | 0 | 0.5135 | 429.5835 | 1286.736 | 1.64  | 0.0007   | 6.032457 |
| P02790 | 0 | 0.8857 | 435.9211 | 1305.749 | 3.19  | 0.00139  | 0        |
| P02790 | 0 | 0.9211 | 653.3779 | 1305.748 | 3.02  | 0.00197  | 6.853622 |
| P02790 | 0 | 0.7879 | 435.9207 | 1305.747 | 2.21  | 0.00096  | 5.965112 |
| P02790 | 0 | 0.9231 | 682.8591 | 1364.711 | 2.16  | 0.00148  | 7.372588 |
| P02790 | 0 | 1      | 661.3391 | 2642.334 | -0.79 | -0.00052 | 74.81864 |
| P02790 | 0 | 1      | 547.265  | 1639.78  | -0.16 | -0.00009 | 21.79093 |
| P02790 | 0 | 1      | 643.7941 | 1286.581 | 2.36  | 0.00152  | 2.916619 |
| P02790 | 0 | 1      | 1254.64  | 2508.272 | 1.87  | 0.00235  | 0        |
| P02790 | 0 | 0.931  | 596.969  | 1788.892 | 3.09  | 0.00184  | 12.18355 |
| P02790 | 0 | 0.8205 | 437.5619 | 1310.671 | 1.88  | 0.00082  | 17.87706 |
| P02790 | 0 | 0.8889 | 653.3767 | 1305.746 | 1.15  | 0.00075  | 7.032547 |
| P02790 | 0 | 0.8148 | 496.2521 | 1981.987 | -1.07 | -0.00053 | 7.094138 |
| P02790 | 0 | 0.5667 | 619.6297 | 1856.875 | 1.5   | 0.00093  | 7.992166 |
| P02790 | 0 | 0.7222 | 715.4023 | 1429.797 | 3.14  | 0.00224  | 5.107313 |
| P02790 | 0 | 1      | 788.7274 | 2364.168 | 0.96  | 0.00075  | 26.47538 |
| P02790 | 0 | 0.8649 | 653.377  | 1305.747 | 1.62  | 0.00105  | 40.61971 |
| P02790 | 0 | 1      | 643.7953 | 1286.583 | 4.26  | 0.00274  | 34.49154 |
| P02790 | 0 | 1      | 547.2658 | 1639.783 | 1.18  | 0.00064  | 9.830676 |
| P02790 | 0 | 1      | 748.3438 | 1495.68  | 1.1   | 0.00083  | 30.44287 |
| P02790 | 0 | 0.9808 | 610.8086 | 1220.61  | 3.33  | 0.00203  | 11.51673 |
| P02790 | 0 | 0.85   | 477.6173 | 1430.837 | 0.98  | 0.00047  | 34.01669 |
| P02790 | 0 | 0.9773 | 429.5318 | 1286.581 | 2.42  | 0.00104  | 5.244845 |
| P02790 | 0 | 0.7586 | 591.6359 | 1772.893 | 0.7   | 0.00041  | 0        |
| P02790 | 0 | 0.8333 | 435.9211 | 1305.749 | 3.12  | 0.00136  | 3.608953 |
| P02790 | 0 | 0.8913 | 653.3756 | 1305.744 | -0.44 | -0.00029 | 5.760612 |
| P02790 | 0 | 0.4706 | 429.5837 | 1286.736 | 2.07  | 0.00089  | 4.268757 |
| P02790 | 0 | 1      | 610.808  | 1220.609 | 2.43  | 0.00148  | 14.43795 |
| P02790 | 0 | 1      | 643.7931 | 1286.579 | 0.84  | 0.00054  | 9.038958 |
| P02790 | 0 | 0.8108 | 653.3779 | 1305.749 | 3.11  | 0.00203  | 28.82355 |
| P02790 | 1 | 0.95   | 526.6532 | 1577.945 | 2.22  | 0.00117  | 56.87579 |
| P02790 | 0 | 0.8235 | 661.3311 | 1981.979 | -5.07 | -0.00335 | 80.61507 |
| P02790 | 0 | 0.9167 | 655.8397 | 1310.672 | 2.68  | 0.00176  | 21.05737 |
| P02790 | 0 | 0.6562 | 442.893  | 1326.665 | 0.74  | 0.00033  | 15.59977 |
| P02790 | 0 | 1      | 610.8076 | 1220.608 | 1.73  | 0.00106  | 28.2862  |
| P02790 | 1 | 1      | 526.6527 | 1577.944 | 1.29  | 0.00068  | 26.63778 |

|        |   |        |          |          |       |          |          |
|--------|---|--------|----------|----------|-------|----------|----------|
| P02790 | 0 | 1      | 547.2661 | 1639.784 | 1.85  | 0.00101  | 31.49541 |
| P02790 | 0 | 0.697  | 477.2705 | 1429.797 | 2.76  | 0.00132  | 37.93758 |
| P02790 | 0 | 0.9444 | 477.6194 | 1430.844 | 5.52  | 0.00263  | 82.64616 |
| P02790 | 0 | 0.92   | 477.2708 | 1429.798 | 3.53  | 0.00168  | 38.29065 |
| P02790 | 0 | 0.8478 | 663.837  | 1326.667 | 2.34  | 0.00155  | 6.187302 |
| P02790 | 0 | 0.5    | 477.2701 | 1429.796 | 2     | 0.00095  | 29.65926 |
| P02790 | 0 | 0.6774 | 437.5624 | 1310.672 | 2.93  | 0.00128  | 12.54712 |
| P02790 | 0 | 0.6047 | 559.3315 | 1117.656 | 2.74  | 0.00153  | 33.61863 |
| P02790 | 1 | 0.4783 | 473.2909 | 1417.858 | 1.7   | 0.00081  | 12.90563 |
| P02790 | 0 | 0.8409 | 435.92   | 1305.746 | 0.81  | 0.00035  | 9.173021 |
| P02790 | 0 | 0.7941 | 833.4172 | 2498.237 | 1.03  | 0.00086  | 2.598774 |
| P02790 | 0 | 0.7879 | 653.377  | 1305.747 | 1.62  | 0.00105  | 7.524767 |
| P02790 | 0 | 1      | 643.7937 | 1286.58  | 1.79  | 0.00115  | 6.727864 |
| P02790 | 0 | 0.875  | 442.8934 | 1326.666 | 1.5   | 0.00066  | 12.3796  |
| P02790 | 0 | 0.8958 | 653.3758 | 1305.744 | -0.16 | -0.0001  | 5.661051 |
| P02790 | 0 | 1      | 748.3423 | 1495.677 | -0.94 | -0.0007  | 0        |
| P02790 | 0 | 1      | 619.629  | 1856.872 | 0.32  | 0.0002   | 18.323   |
| P02790 | 0 | 0.8    | 437.5611 | 1310.669 | -0.01 | 0        | 8.671872 |
| P02790 | 1 | 0.675  | 709.4328 | 1417.858 | 1.78  | 0.00126  | 8.354035 |
| P02790 | 0 | 0.8333 | 881.4481 | 2642.33  | -2.52 | -0.00222 | 0        |
| P02790 | 0 | 1      | 788.7275 | 2364.168 | 1.11  | 0.00087  | 13.26155 |
| P02790 | 0 | 0.7586 | 442.8947 | 1326.67  | 4.61  | 0.00204  | 20.28485 |
| P02790 | 1 | 1      | 405.5642 | 1214.678 | 1.45  | 0.00059  | 9.480793 |
| P02790 | 0 | 0.6957 | 661.3417 | 2642.345 | 3.18  | 0.0021   | 46.17258 |
| P02790 | 0 | 1      | 651.7924 | 1302.578 | 3.7   | 0.00241  | 27.38969 |
| P02790 | 0 | 0.7    | 559.3322 | 1117.657 | 3.94  | 0.0022   | 0        |
| P02790 | 1 | 1      | 471.5978 | 1412.779 | 1.57  | 0.00074  | 19.02959 |
| P02790 | 0 | 0.625  | 715.4027 | 1429.798 | 3.56  | 0.00255  | 7.108372 |
| P02790 | 0 | 0.7667 | 631.3807 | 1261.754 | -0.39 | -0.00025 | 5.886368 |
| P02790 | 0 | 1      | 610.8067 | 1220.606 | 0.23  | 0.00014  | 23.12741 |
| P02790 | 0 | 1      | 429.5312 | 1286.579 | 0.92  | 0.0004   | 63.26123 |
| P02790 | 0 | 0.8519 | 682.859  | 1364.711 | 2.07  | 0.00142  | 0        |
| P02790 | 0 | 1      | 651.7897 | 1302.572 | -0.42 | -0.00027 | 24.52917 |
| P02790 | 0 | 0.8333 | 435.9198 | 1305.745 | 0.18  | 0.00008  | 10.08229 |
| P02790 | 0 | 0.7742 | 653.3781 | 1305.749 | 3.3   | 0.00215  | 0        |
| P02790 | 0 | 0.7209 | 559.3315 | 1117.656 | 2.85  | 0.00159  | 7.019646 |
| P02790 | 0 | 1      | 455.5754 | 1364.711 | 2.62  | 0.00119  | 35.94758 |
| P02790 | 0 | 1      | 643.7933 | 1286.579 | 1.22  | 0.00078  | 3.080237 |
| P02790 | 0 | 0.8571 | 596.9692 | 1788.893 | 3.5   | 0.00209  | 9.414963 |
| P02790 | 0 | 0.75   | 655.8402 | 1310.673 | 3.42  | 0.00224  | 13.53162 |
| P02790 | 0 | 1      | 643.7958 | 1286.584 | 5.01  | 0.00323  | 17.61691 |
| P02790 | 0 | 0.9545 | 610.8083 | 1220.609 | 2.83  | 0.00173  | 3.5931   |
| P02790 | 0 | 0.6818 | 643.3547 | 1285.702 | 8.72  | 0.00561  | 52.81116 |
| P02790 | 0 | 0.76   | 833.4227 | 2498.253 | 7.63  | 0.00635  | 73.57045 |
| P02790 | 0 | 1      | 619.6304 | 1856.877 | 2.68  | 0.00166  | 42.66243 |
| P02790 | 0 | 1      | 651.791  | 1302.575 | 1.55  | 0.00101  | 3.864536 |
| P02790 | 0 | 0.9565 | 643.7939 | 1286.58  | 2.07  | 0.00133  | 17.37591 |
| P02790 | 0 | 0.5833 | 437.5619 | 1310.671 | 1.95  | 0.00085  | 57.80194 |
| P02790 | 0 | 1      | 619.6301 | 1856.876 | 2.19  | 0.00136  | 37.83699 |
| P02790 | 0 | 0.4333 | 429.5848 | 1286.74  | 4.7   | 0.00202  | 19.87834 |
| P02790 | 0 | 1      | 610.8078 | 1220.608 | 2.03  | 0.00124  | 0        |
| P02790 | 0 | 1      | 596.9694 | 1788.894 | 3.7   | 0.00221  | 9.164256 |



|        |   |        |          |          |       |          |          |
|--------|---|--------|----------|----------|-------|----------|----------|
| P02790 | 0 | 0.6923 | 437.563  | 1310.674 | 4.32  | 0.00189  | 25.29589 |
| P02790 | 0 | 1      | 663.8368 | 1326.666 | 2.06  | 0.00137  | 4.283311 |
| P02790 | 0 | 1      | 687.405  | 2060.2   | -1.48 | -0.00102 | 54.21088 |
| P02790 | 0 | 0.8667 | 881.4553 | 2642.351 | 5.66  | 0.00498  | 0        |
| P02790 | 0 | 0.4444 | 627.8239 | 2508.274 | 2.5   | 0.00157  | 36.75036 |
| P02790 | 0 | 1      | 651.792  | 1302.577 | 3.05  | 0.00198  | 13.76973 |
| P02790 | 0 | 1      | 455.5758 | 1364.713 | 3.56  | 0.00162  | 56.38852 |
| P02790 | 0 | 0.65   | 709.3707 | 2126.098 | 3.17  | 0.00224  | 9.560533 |
| P02790 | 0 | 0.6667 | 886.9501 | 1772.893 | 0.57  | 0.0005   | 0        |
| P02790 | 0 | 0.7083 | 442.8929 | 1326.664 | 0.47  | 0.00021  | 25.79791 |
| P02790 | 0 | 0.8065 | 477.6173 | 1430.837 | 0.98  | 0.00047  | 9.734451 |
| P02790 | 0 | 0.6316 | 477.2704 | 1429.797 | 2.57  | 0.00123  | 30.02251 |
| P02790 | 0 | 0.7778 | 661.3417 | 2642.345 | 3.27  | 0.00216  | 8.619888 |
| P02790 | 0 | 0.6364 | 715.9225 | 1430.838 | 1.33  | 0.00095  | 5.997162 |
| P02790 | 0 | 0.9259 | 653.3778 | 1305.748 | 2.83  | 0.00185  | 14.76439 |
| P02790 | 0 | 1      | 455.5748 | 1364.71  | 1.48  | 0.00067  | 17.8491  |
| P02790 | 0 | 1      | 651.7924 | 1302.577 | 3.61  | 0.00235  | 0        |
| P02790 | 0 | 1      | 748.3455 | 1495.684 | 3.31  | 0.00247  | 0        |
| P02790 | 0 | 0.4118 | 661.3361 | 1981.994 | 2.51  | 0.00166  | 36.75528 |
| P02790 | 0 | 1      | 651.7917 | 1302.576 | 2.58  | 0.00168  | 19.30686 |
| P02790 | 0 | 1      | 651.7912 | 1302.575 | 1.83  | 0.00119  | 9.342721 |
| P04003 | 0 | 0.8462 | 577.9735 | 1731.906 | 2.77  | 0.0016   | 39.93862 |
| P04003 | 1 | 1      | 592.5422 | 2367.147 | 6.75  | 0.004    | 0        |
| P04003 | 0 | 1      | 791.3607 | 1581.714 | 1.63  | 0.00129  | 30.35863 |
| P04003 | 0 | 0.971  | 762.0198 | 2284.045 | 0.39  | 0.00029  | 4.122707 |
| P04003 | 0 | 0.9062 | 571.7678 | 2284.049 | 2.44  | 0.00139  | 9.958784 |
| P04003 | 0 | 0.9286 | 1142.527 | 2284.047 | 1.43  | 0.00164  | 0        |
| P04003 | 0 | 0.9692 | 762.0204 | 2284.047 | 1.19  | 0.0009   | 3.49351  |
| P04003 | 0 | 0.2703 | 840.7556 | 2520.252 | 2.3   | 0.00193  | 0        |
| P04003 | 0 | 0.907  | 697.3949 | 1393.783 | 1.28  | 0.00089  | 3.804579 |
| P04003 | 0 | 0.9821 | 697.3955 | 1393.784 | 2.15  | 0.0015   | 12.91592 |
| P04003 | 0 | 1      | 465.2655 | 1393.782 | 0.87  | 0.0004   | 9.287104 |
| P04003 | 0 | 0.9149 | 762.0212 | 2284.049 | 2.23  | 0.0017   | 10.20921 |
| P04003 | 0 | 0.9062 | 456.9064 | 1368.705 | 0.57  | 0.00026  | 9.161044 |
| P04003 | 0 | 0.9062 | 684.8564 | 1368.705 | 1.25  | 0.00086  | 5.453128 |
| P04003 | 0 | 0.9286 | 456.9068 | 1368.706 | 1.44  | 0.00066  | 6.328815 |
| P04003 | 0 | 1      | 575.9439 | 1725.817 | 2.01  | 0.00116  | 4.341281 |
| P04003 | 0 | 1      | 863.4114 | 1725.815 | 1.14  | 0.00098  | 3.270589 |
| P04003 | 0 | 1      | 575.9445 | 1725.819 | 3.07  | 0.00177  | 16.95031 |
| P04003 | 0 | 1      | 575.944  | 1725.817 | 2.23  | 0.00128  | 44.79838 |
| P04003 | 0 | 0.9592 | 665.1003 | 2657.38  | 1.42  | 0.00095  | 5.72896  |
| P04003 | 0 | 0.9643 | 473.8943 | 1419.668 | 2.08  | 0.00098  | 25.94194 |
| P04003 | 0 | 1      | 863.4118 | 1725.816 | 1.63  | 0.00141  | 5.102597 |
| P04003 | 0 | 1      | 575.9436 | 1725.816 | 1.59  | 0.00091  | 6.121918 |
| P04003 | 0 | 0.9756 | 886.4644 | 2657.379 | 1.11  | 0.00098  | 8.402198 |
| P04003 | 0 | 0.9    | 532.2813 | 2657.377 | 0.52  | 0.00028  | 8.856483 |
| P04003 | 0 | 1      | 866.4564 | 1731.906 | 2.54  | 0.0022   | 10.07373 |
| P04003 | 0 | 1      | 577.9735 | 1731.906 | 2.77  | 0.0016   | 9.586963 |
| P04003 | 0 | 1      | 665.1005 | 2657.38  | 1.61  | 0.00107  | 6.675801 |
| P04003 | 0 | 0.5849 | 618.883  | 1236.759 | 2.66  | 0.00165  | 6.128533 |
| P04003 | 0 | 1      | 723.0161 | 2167.034 | 1.53  | 0.0011   | 3.143506 |
| P04003 | 0 | 1      | 665.6967 | 1995.075 | 1.5   | 0.001    | 8.57529  |

|        |   |        |          |          |       |          |          |
|--------|---|--------|----------|----------|-------|----------|----------|
| P04003 | 0 | 0.6207 | 499.5237 | 1995.073 | 0.36  | 0.00018  | 4.095746 |
| P04003 | 0 | 1      | 665.6959 | 1995.073 | 0.4   | 0.00027  | 8.437095 |
| P04003 | 0 | 0.825  | 617.6623 | 1850.972 | 1.07  | 0.00066  | 2.227891 |
| P04003 | 0 | 1      | 583.3052 | 1747.901 | 2.9   | 0.00169  | 0        |
| P04003 | 0 | 0.7273 | 538.9785 | 1614.921 | 1.67  | 0.0009   | 6.003868 |
| P04003 | 0 | 0.8434 | 807.9638 | 1614.92  | 1.26  | 0.00102  | 3.590006 |
| P04003 | 0 | 1      | 521.9287 | 1563.771 | 2.48  | 0.00129  | 31.26053 |
| P04003 | 0 | 1      | 521.9275 | 1563.768 | 0.26  | 0.00013  | 44.10965 |
| P04003 | 0 | 0.9808 | 521.9279 | 1563.769 | 0.96  | 0.0005   | 13.91652 |
| P04003 | 0 | 1      | 737.6812 | 2211.029 | -0.42 | -0.00031 | 16.69851 |
| P04003 | 0 | 1      | 521.928  | 1563.769 | 1.19  | 0.00062  | 30.64044 |
| P04003 | 0 | 1      | 1006.484 | 3017.438 | 2.1   | 0.00211  | 3.853532 |
| P04003 | 0 | 0.9778 | 594.2934 | 1780.866 | 3.14  | 0.00187  | 28.99681 |
| P04003 | 0 | 1      | 594.293  | 1780.864 | 2.42  | 0.00144  | 7.631752 |
| P04003 | 0 | 1      | 594.2941 | 1780.868 | 4.27  | 0.00254  | 10.54688 |
| P04003 | 0 | 1      | 594.2935 | 1780.866 | 3.35  | 0.00199  | 8.394278 |
| P04003 | 0 | 1      | 594.2934 | 1780.866 | 3.14  | 0.00187  | 11.27181 |
| P04003 | 0 | 1      | 594.2935 | 1780.866 | 3.25  | 0.00193  | 4.428563 |
| P04003 | 0 | 0.8889 | 594.2932 | 1780.865 | 2.73  | 0.00162  | 10.73281 |
| P04003 | 0 | 1      | 594.2918 | 1780.861 | 0.37  | 0.00022  |          |
| P04003 | 0 | 1      | 594.2933 | 1780.865 | 2.94  | 0.00174  | 21.4029  |
| P04003 | 0 | 0.9821 | 743.8709 | 1486.735 | 0.53  | 0.00039  | 5.917057 |
| P04003 | 0 | 0.9804 | 496.2496 | 1486.734 | 0.4   | 0.0002   | 11.87973 |
| P04003 | 0 | 0.7    | 743.8714 | 1486.736 | 1.19  | 0.00088  | 100      |
| P04003 | 0 | 0.8571 | 743.8707 | 1486.734 | 0.28  | 0.00021  | 21.13439 |
| P04003 | 0 | 0.8889 | 743.8712 | 1486.735 | 0.86  | 0.00064  | 6.260056 |
| P04003 | 0 | 0.8958 | 496.2495 | 1486.734 | 0.03  | 0.00001  | 8.309007 |
| P04003 | 0 | 0.9459 | 577.9731 | 1731.905 | 2.03  | 0.00117  | 53.43172 |
| P04003 | 0 | 0.6538 | 412.9241 | 1236.758 | 1.96  | 0.00081  | 19.6584  |
| P04003 | 0 | 0.98   | 654.3664 | 1307.726 | 1.32  | 0.00086  | 7.611247 |
| P04003 | 0 | 1      | 424.2446 | 1270.719 | 0.99  | 0.00042  | 19.71972 |
| P04003 | 0 | 0.9333 | 496.2497 | 1486.734 | 0.46  | 0.00023  | 8.840238 |
| P04003 | 0 | 0.8837 | 697.395  | 1393.783 | 1.45  | 0.00101  | 18.66573 |
| P04003 | 0 | 0.4286 | 571.3325 | 1141.658 | 4.13  | 0.00236  | 3.239827 |
| P04003 | 0 | 0.641  | 496.2505 | 1486.737 | 2.18  | 0.00108  | 34.28121 |
| P04003 | 0 | 1      | 666.8434 | 2664.352 | 1.27  | 0.00085  | 38.21416 |
| P04003 | 0 | 1      | 665.6948 | 1995.07  | -1.34 | -0.00089 | 23.38381 |
| P04003 | 0 | 0.5263 | 618.8817 | 1236.756 | 0.59  | 0.00037  | 0        |
| P04003 | 0 | 1      | 654.3669 | 1307.726 | 2.07  | 0.00135  | 7.660088 |
| P04003 | 0 | 1      | 521.9275 | 1563.768 | 0.26  | 0.00013  | 50.3068  |
| P04003 | 0 | 0.8788 | 669.0999 | 2673.378 | 2.59  | 0.00173  | 6.195457 |
| P04003 | 0 | 0.8947 | 697.3961 | 1393.785 | 3.03  | 0.00211  | 13.96212 |
| P04003 | 0 | 0.9375 | 594.2937 | 1780.867 | 3.66  | 0.00217  | 9.182528 |
| P04003 | 0 | 1      | 665.1005 | 2657.38  | 1.61  | 0.00107  | 38.72942 |
| P04003 | 0 | 0.9677 | 697.3972 | 1393.787 | 4.52  | 0.00315  | 0        |
| P04003 | 0 | 1      | 625.3438 | 1249.68  | 1.24  | 0.00077  | 53.08512 |
| P04003 | 0 | 0.5741 | 557.3252 | 1113.643 | 2.15  | 0.0012   | 4.562491 |
| P04003 | 0 | 0.4848 | 618.8818 | 1236.756 | 0.79  | 0.00049  | 0        |
| P04003 | 0 | 0.8846 | 594.2935 | 1780.866 | 3.25  | 0.00193  | 4.399632 |
| P04003 | 0 | 0.5    | 571.3317 | 1141.656 | 2.74  | 0.00156  | 16.66837 |
| P04003 | 0 | 1      | 391.6986 | 1563.773 | 3.33  | 0.0013   | 44.70418 |
| P04003 | 1 | 0.9048 | 443.2823 | 1327.832 | 1.04  | 0.00046  | 12.28446 |

|        |   |        |          |          |       |          |          |
|--------|---|--------|----------|----------|-------|----------|----------|
| P04003 | 0 | 1      | 782.3881 | 1563.769 | 0.85  | 0.00066  | 8.99669  |
| P04003 | 0 | 0.6129 | 618.8828 | 1236.758 | 2.37  | 0.00146  | 41.83931 |
| P04003 | 0 | 1      | 465.2658 | 1393.783 | 1.53  | 0.00071  | 4.642035 |
| P04003 | 0 | 1      | 654.3666 | 1307.726 | 1.69  | 0.00111  | 6.419182 |
| P04003 | 0 | 0.4872 | 412.9236 | 1236.756 | 0.63  | 0.00026  | 6.752341 |
| P04003 | 1 | 0.1    | 710.6102 | 2839.419 | 2.87  | 0.00204  | 22.72827 |
| P04003 | 0 | 1      | 710.3374 | 1419.668 | 1.46  | 0.00104  | 0        |
| P04003 | 0 | 0.8276 | 424.8901 | 1272.656 | 2.26  | 0.00096  | 3.071523 |
| P04003 | 0 | 1      | 529.9382 | 1587.8   | 0.54  | 0.00028  | 22.28356 |
| P04003 | 0 | 0.9167 | 594.2911 | 1780.859 | -0.66 | -0.00039 | 0        |
| P04003 | 0 | 0.5926 | 557.3262 | 1113.645 | 3.9   | 0.00217  | 4.750621 |
| P04003 | 0 | 0.96   | 594.2925 | 1780.863 | 1.7   | 0.00101  | 12.30907 |
| P04003 | 0 | 0.8421 | 594.2921 | 1780.862 | 0.98  | 0.00058  | 18.51723 |
| P04003 | 0 | 0.9167 | 571.7678 | 2284.049 | 2.33  | 0.00133  | 16.62981 |
| P04003 | 0 | 0.84   | 594.2941 | 1780.868 | 4.27  | 0.00254  | 22.99557 |
| P04003 | 0 | 0.5862 | 412.9233 | 1236.755 | 0.04  | 0.00002  | 0        |
| P04003 | 0 | 1      | 594.2938 | 1780.867 | 3.76  | 0.00223  | 45.42695 |
| P04003 | 0 | 0.9556 | 582.3161 | 1163.625 | 2.75  | 0.0016   | 0        |
| P04003 | 0 | 0.6818 | 666.8449 | 2664.358 | 3.38  | 0.00225  | 5.265999 |
| P04003 | 0 | 0.8182 | 496.2497 | 1486.735 | 0.58  | 0.00029  | 32.4411  |
| P04003 | 0 | 0.6    | 546.8314 | 1092.656 | 2.02  | 0.0011   | 2.89266  |
| P04003 | 0 | 1      | 689.6487 | 2066.931 | 1.71  | 0.00118  | 38.6515  |
| P04003 | 0 | 0.8857 | 636.8303 | 1272.653 | 0.43  | 0.00027  | 3.067272 |
| P04003 | 0 | 1      | 723.0165 | 2167.035 | 2.12  | 0.00153  | 0        |
| P04003 | 0 | 0.913  | 998.0417 | 1995.076 | 1.85  | 0.00184  | 4.148412 |
| P04003 | 0 | 0.9    | 594.2933 | 1780.865 | 3.04  | 0.0018   | 12.26732 |
| P04003 | 0 | 0.931  | 654.3668 | 1307.726 | 1.97  | 0.00129  | 18.28392 |
| P04003 | 0 | 0.8846 | 436.5799 | 1307.725 | 1.1   | 0.00048  | 2.087198 |
| P04003 | 0 | 0.2083 | 617.6627 | 1850.974 | 1.76  | 0.00109  | 11.55008 |
| P04003 | 0 | 0.8846 | 436.5802 | 1307.726 | 1.66  | 0.00072  | 9.386792 |
| P04003 | 0 | 0.8333 | 594.2935 | 1780.866 | 3.25  | 0.00193  | 19.40338 |
| P04003 | 0 | 0.9545 | 436.5791 | 1307.723 | -0.86 | -0.00037 | 36.24191 |
| P04003 | 0 | 1      | 782.3893 | 1563.771 | 2.41  | 0.00189  | 0        |
| P04003 | 0 | 0.8571 | 665.6947 | 1995.07  | -1.43 | -0.00095 | 0        |
| P04003 | 0 | 0.8276 | 636.8328 | 1272.658 | 4.45  | 0.00283  | 13.46358 |
| P04003 | 0 | 0.9091 | 594.293  | 1780.865 | 2.53  | 0.0015   | 45.06875 |
| P04003 | 0 | 0.8125 | 594.2929 | 1780.864 | 2.22  | 0.00132  | 37.84834 |
| P04003 | 0 | 0.7143 | 496.254  | 1486.747 | 9.2   | 0.00456  | 21.89094 |
| P04003 | 0 | 0.6667 | 630.8229 | 2520.27  | 9.3   | 0.00586  | 80.25001 |
| P04003 | 0 | 0.9091 | 594.2943 | 1780.868 | 4.69  | 0.00278  | 21.22748 |
| P03952 | 0 | 1      | 1007.493 | 3020.463 | 0.81  | 0.00082  | 3.181053 |
| P03952 | 0 | 0.9583 | 802.4149 | 1603.822 | 1.74  | 0.00139  | 3.011365 |
| P03952 | 0 | 1      | 535.2791 | 1603.823 | 1.85  | 0.00099  | 13.20701 |
| P03952 | 1 | 0.9091 | 578.0175 | 1732.038 | 2.85  | 0.00164  | 21.81792 |
| P03952 | 1 | 1      | 578.0176 | 1732.038 | 3.06  | 0.00177  | 12.43199 |
| P03952 | 1 | 0.8571 | 578.0179 | 1732.039 | 3.69  | 0.00213  | 16.64993 |
| P03952 | 0 | 1      | 703.3482 | 1405.689 | -0.09 | -0.00006 | 0        |
| P03952 | 0 | 1      | 517.2692 | 1549.793 | 1.04  | 0.00054  | 10.85589 |
| P03952 | 0 | 0.9839 | 661.3574 | 1321.707 | 1.5   | 0.00099  | 3.710219 |
| P03952 | 0 | 0.8615 | 611.3337 | 1831.987 | 2.22  | 0.00136  | 7.481466 |
| P03952 | 0 | 0.8103 | 562.3014 | 1684.89  | 2.24  | 0.00126  | 8.835663 |
| P03952 | 0 | 1      | 842.9477 | 1684.888 | 1.35  | 0.00113  | 9.833282 |

|            |   |        |          |          |       |          |          |
|------------|---|--------|----------|----------|-------|----------|----------|
| P03952     | 1 | 1      | 455.9296 | 1365.774 | 1.01  | 0.00046  | 44.15098 |
| P03952     | 0 | 0.9796 | 823.3984 | 2468.181 | 0.45  | 0.00037  | 2.843171 |
| P03952     | 0 | 0.8776 | 603.354  | 1205.701 | 2.3   | 0.00138  | 6.096952 |
| P03952     | 0 | 1      | 528.5988 | 1583.782 | 3.62  | 0.00191  | 5.541241 |
| P03952     | 0 | 0.9778 | 452.9117 | 1356.72  | 1.56  | 0.0007   | 10.34233 |
| P03952     | 0 | 1      | 731.66   | 2192.965 | 0.46  | 0.00034  | 36.83466 |
| P03952     | 0 | 1      | 775.4006 | 1549.794 | 1.72  | 0.00133  | 7.716219 |
| P03952     | 0 | 1      | 517.2687 | 1549.791 | 0.1   | 0.00005  | 10.97659 |
| P03952     | 0 | 1      | 375.1787 | 1497.693 | 0.78  | 0.00029  | 17.94917 |
| P03952     | 0 | 1      | 499.9023 | 1497.692 | 0.35  | 0.00017  | 18.98055 |
| P03952     | 0 | 1      | 482.6175 | 1445.838 | 1.64  | 0.00079  | 10.01029 |
| P03952     | 0 | 0.9286 | 528.6392 | 1583.903 | 2.15  | 0.00114  | 14.429   |
| P03952     | 1 | 0.8929 | 433.7643 | 1732.036 | 1.54  | 0.00067  | 14.46412 |
| P03952     | 0 | 0.8727 | 482.2323 | 963.4574 | 1.01  | 0.00049  | 16.44532 |
| P03952     | 1 | 0.96   | 433.7646 | 1732.036 | 2.03  | 0.00088  | 5.421066 |
| P03952     | 0 | 0.9655 | 622.8648 | 1244.722 | 1.8   | 0.00112  | 20.13895 |
| P03952     | 0 | 0.9459 | 482.6176 | 1445.838 | 1.89  | 0.00091  | 13.68931 |
| P03952     | 0 | 0.5517 | 444.2701 | 1330.796 | 1.89  | 0.00084  | 13.07454 |
| P03952     | 0 | 0.7959 | 612.3477 | 1223.688 | 0.52  | 0.00032  | 9.290229 |
| P03952     | 0 | 0.85   | 404.8775 | 1212.618 | 1.27  | 0.00051  | 30.5583  |
| P03952     | 0 | 1      | 460.5992 | 1379.783 | 4.08  | 0.00188  | 30.37824 |
| P03952; P2 | 0 | 0.9333 | 426.565  | 1277.681 | 3.41  | 0.00145  | 0        |
| P03952     | 0 | 1      | 460.5978 | 1379.779 | 1.02  | 0.00047  | 42.17579 |
| P03952     | 0 | 1      | 441.2408 | 1321.708 | 1.9   | 0.00084  | 0        |
| P03952     | 0 | 0.9231 | 916.4963 | 1831.985 | 1.46  | 0.00134  | 6.034744 |
| P03952     | 0 | 0.9429 | 775.4016 | 1549.796 | 2.98  | 0.00231  | 2.149021 |
| P03952     | 0 | 0.8824 | 528.639  | 1583.903 | 1.92  | 0.00101  | 32.58677 |
| P03952     | 0 | 1      | 452.9136 | 1356.726 | 5.74  | 0.0026   | 5.166926 |
| P03952     | 0 | 1      | 482.2324 | 963.4575 | 1.08  | 0.00052  | 7.208748 |
| P03952     | 0 | 0.7667 | 451.9029 | 1353.694 | 1.4   | 0.00063  | 20.73062 |
| P03952     | 0 | 0.92   | 517.2681 | 1549.79  | -1.08 | -0.00056 | 23.66366 |
| P03952     | 1 | 0.5714 | 433.7641 | 1732.035 | 0.97  | 0.00042  | 5.24967  |
| P03952     | 1 | 0.7419 | 529.9819 | 1587.931 | 0.27  | 0.00014  | 67.18843 |
| P03952     | 1 | 0.7419 | 529.9819 | 1587.931 | 0.27  | 0.00014  | 67.18843 |
| P03952     | 0 | 1      | 404.8774 | 1212.618 | 1.2   | 0.00048  | 38.38169 |
| P03952     | 0 | 1      | 605.3419 | 1209.676 | 3.88  | 0.00235  | 46.42304 |
| P03952     | 0 | 0.8438 | 612.3497 | 1223.692 | 3.91  | 0.00239  | 41.04689 |
| P03952     | 0 | 0.9667 | 775.4001 | 1549.793 | 1.01  | 0.00079  | 0        |
| P03952     | 0 | 0.7778 | 612.3498 | 1223.692 | 4.01  | 0.00245  | 38.50381 |
| P19827     | 0 | 1      | 502.2592 | 2006.015 | 2.88  | 0.00144  | 45.20381 |
| P19827     | 0 | 1      | 689.3588 | 3442.765 | 2.68  | 0.00184  | 13.48158 |
| P19827     | 0 | 1      | 861.4465 | 3442.764 | 2.47  | 0.00213  | 0        |
| P19827     | 0 | 1      | 689.3613 | 3442.777 | 6.22  | 0.00429  | 34.94258 |
| P19827     | 0 | 0.9882 | 669.3419 | 2006.011 | 1.09  | 0.00073  | 0        |
| P19827     | 0 | 1      | 857.4479 | 3426.77  | 2.64  | 0.00226  | 13.56148 |
| P19827     | 0 | 1      | 857.4478 | 3426.769 | 2.42  | 0.00207  | 1.49261  |
| P19827     | 0 | 0.9615 | 686.1593 | 3426.767 | 1.9   | 0.0013   | 7.658159 |
| P19827     | 0 | 1      | 857.4468 | 3426.766 | 1.35  | 0.00116  | 3.932991 |
| P19827     | 0 | 1      | 686.1589 | 3426.766 | 1.37  | 0.00094  | 6.987109 |
| P19827     | 0 | 1      | 857.4465 | 3426.764 | 0.93  | 0.00079  | 5.578273 |
| P19827     | 0 | 1      | 861.446  | 3442.762 | 1.9   | 0.00164  | 0        |
| P19827     | 0 | 1      | 717.3759 | 2150.113 | 0.98  | 0.00071  | 0        |

|        |   |        |          |          |      |          |          |
|--------|---|--------|----------|----------|------|----------|----------|
| P19827 | 0 | 0.9831 | 717.3772 | 2150.117 | 2.77 | 0.00199  | 1.731905 |
| P19827 | 0 | 1      | 455.8993 | 1365.683 | 1.36 | 0.00062  | 3.450308 |
| P19827 | 0 | 0.8406 | 724.917  | 1448.827 | 1.94 | 0.00141  | 5.241786 |
| P19827 | 0 | 0.6889 | 483.6135 | 1448.826 | 1.47 | 0.00071  | 9.13039  |
| P19827 | 0 | 0.8769 | 512.2838 | 1534.837 | 1.39 | 0.00071  | 7.962925 |
| P19827 | 0 | 0.9487 | 767.9216 | 1534.836 | 0.92 | 0.00071  | 3.609533 |
| P19827 | 0 | 1      | 695.8709 | 1390.734 | 1.38 | 0.00096  | 5.172676 |
| P19827 | 0 | 1      | 686.1582 | 3426.762 | 0.3  | 0.0002   | 9.128318 |
| P19827 | 0 | 1      | 857.4466 | 3426.765 | 1.07 | 0.00092  | 7.652941 |
| P19827 | 0 | 0.75   | 724.9168 | 1448.826 | 1.61 | 0.00116  | 41.33025 |
| P19827 | 0 | 0.9143 | 717.3764 | 2150.115 | 1.67 | 0.00119  | 0        |
| P19827 | 0 | 0.9881 | 717.3766 | 2150.115 | 1.92 | 0.00138  | 2.873098 |
| P19827 | 0 | 1      | 538.2837 | 2150.113 | 0.86 | 0.00046  | 10.13554 |
| P19827 | 0 | 1      | 538.2836 | 2150.113 | 0.75 | 0.0004   | 4.308006 |
| P19827 | 0 | 1      | 717.3754 | 2150.112 | 0.3  | 0.00022  | 2.36122  |
| P19827 | 0 | 1      | 1075.56  | 2150.113 | 0.82 | 0.00088  | 0        |
| P19827 | 0 | 0.7    | 521.626  | 1562.864 | 2.09 | 0.00109  | 11.93568 |
| P19827 | 0 | 0.6389 | 521.6256 | 1562.862 | 1.27 | 0.00066  | 29.19496 |
| P19827 | 0 | 0.8889 | 455.8996 | 1365.684 | 2.16 | 0.00098  | 3.740248 |
| P19827 | 1 | 1      | 525.3148 | 1573.93  | 2.23 | 0.00117  | 7.2367   |
| P19827 | 1 | 1      | 525.3151 | 1573.931 | 2.69 | 0.00141  | 13.50332 |
| P19827 | 0 | 0.9767 | 669.3391 | 2006.003 | -3.2 | -0.00214 | 8.538748 |
| P19827 | 0 | 1      | 1003.511 | 2006.014 | 2.65 | 0.00266  | 0        |
| P19827 | 0 | 1      | 669.3416 | 2006.01  | 0.64 | 0.00042  | 0        |
| P19827 | 0 | 1      | 502.2577 | 2006.009 | 0.02 | 0.00001  | 12.30029 |
| P19827 | 0 | 0.8636 | 717.3763 | 2150.114 | 1.5  | 0.00107  | 2.724067 |
| P19827 | 0 | 0.9245 | 717.3799 | 2150.125 | 6.61 | 0.00473  | 7.377326 |
| P19827 | 0 | 0.9    | 721.3932 | 2162.165 | 6.12 | 0.00441  | 22.2168  |
| P19827 | 0 | 0.9697 | 541.2951 | 2162.159 | 3.15 | 0.0017   | 11.17634 |
| P19827 | 0 | 1      | 721.3903 | 2162.156 | 2.14 | 0.00154  | 4.324872 |
| P19827 | 0 | 1      | 721.3911 | 2162.159 | 3.15 | 0.00227  | 9.064602 |
| P19827 | 0 | 0.8043 | 689.4046 | 1377.802 | 2.84 | 0.00196  | 0        |
| P19827 | 0 | 0.8197 | 689.4047 | 1377.802 | 3.02 | 0.00208  | 7.309332 |
| P19827 | 0 | 0.825  | 459.9379 | 1377.799 | 0.88 | 0.00041  | 9.876637 |
| P19827 | 0 | 1      | 407.8652 | 1221.581 | 1.35 | 0.00055  | 33.46538 |
| P19827 | 0 | 0.9268 | 455.899  | 1365.682 | 0.69 | 0.00031  | 37.74993 |
| P19827 | 0 | 0.8302 | 689.4067 | 1377.806 | 5.94 | 0.00409  | 28.11077 |
| P19827 | 1 | 1      | 477.281  | 1429.828 | 2.82 | 0.00135  | 50.93655 |
| P19827 | 1 | 1      | 477.281  | 1429.828 | 2.82 | 0.00135  | 50.93655 |
| P19827 | 0 | 0.775  | 521.6256 | 1562.862 | 1.27 | 0.00066  | 20.27046 |
| P19827 | 0 | 0.8571 | 660.609  | 2639.414 | 2.58 | 0.0017   | 4.423915 |
| P19827 | 0 | 0.9706 | 880.4749 | 2639.41  | 1.08 | 0.00095  | 32.80231 |
| P19827 | 0 | 0.9242 | 586.6712 | 1757.999 | 3.59 | 0.0021   | 10.66379 |
| P19827 | 0 | 0.931  | 586.6711 | 1757.999 | 3.48 | 0.00204  | 8.329605 |
| P19827 | 0 | 0.9551 | 616.0784 | 2461.292 | 2.68 | 0.00165  | 2.491924 |
| P19827 | 0 | 0.95   | 716.7116 | 2148.12  | 1.73 | 0.00124  | 5.98686  |
| P19827 | 0 | 1      | 1074.563 | 2148.119 | 1.23 | 0.00132  | 0        |
| P19827 | 0 | 1      | 716.7106 | 2148.117 | 0.28 | 0.0002   | 0.907566 |
| P19827 | 0 | 1      | 716.7108 | 2148.118 | 0.54 | 0.00038  | 2.442147 |
| P19827 | 0 | 0.9091 | 807.9176 | 1614.828 | 2.19 | 0.00177  | 0        |
| P19827 | 0 | 0.987  | 538.9471 | 1614.827 | 1.42 | 0.00077  | 5.792378 |
| P19827 | 0 | 0.9881 | 807.916  | 1614.825 | 0.22 | 0.00018  | 3.191833 |

|        |   |        |          |          |       |          |          |
|--------|---|--------|----------|----------|-------|----------|----------|
| P19827 | 0 | 1      | 538.9467 | 1614.826 | 0.74  | 0.0004   | 10.91788 |
| P19827 | 0 | 0.9524 | 455.8996 | 1365.684 | 2.16  | 0.00098  | 16.29556 |
| P19827 | 0 | 1      | 455.8993 | 1365.683 | 1.36  | 0.00062  | 41.6964  |
| P19827 | 0 | 0.9892 | 821.0991 | 2461.283 | -1.09 | -0.00089 | 7.442227 |
| P19827 | 1 | 1      | 523.9715 | 1569.9   | 2.47  | 0.00129  | 38.97852 |
| P19827 | 0 | 1      | 790.9352 | 1580.863 | 2.79  | 0.00221  | 11.04541 |
| P19827 | 0 | 0.2857 | 1004.143 | 3010.416 | 4.83  | 0.00484  | 31.44452 |
| P19827 | 0 | 0.2157 | 581.3602 | 1161.713 | 4.35  | 0.00252  | 10.98513 |
| P19827 | 0 | 1      | 461.2311 | 1381.679 | 1.66  | 0.00077  | 19.4267  |
| P19827 | 0 | 1      | 461.2299 | 1381.675 | -0.79 | -0.00036 | 26.6718  |
| P19827 | 0 | 1      | 461.231  | 1381.678 | 1.53  | 0.00071  | 4.753454 |
| P19827 | 0 | 1      | 691.3434 | 1381.68  | 2.4   | 0.00166  | 2.939857 |
| P19827 | 0 | 1      | 461.2312 | 1381.679 | 2     | 0.00092  | 20.77578 |
| P19827 | 0 | 0.8932 | 579.3191 | 1157.631 | 3.11  | 0.0018   | 15.08549 |
| P19827 | 0 | 1      | 461.2311 | 1381.679 | 1.73  | 0.0008   | 5.567979 |
| P19827 | 0 | 1      | 489.2369 | 1465.696 | 1.45  | 0.00071  | 21.17375 |
| P19827 | 0 | 1      | 683.3458 | 1365.684 | 2.1   | 0.00144  | 2.56214  |
| P19827 | 0 | 1      | 461.2314 | 1381.68  | 2.46  | 0.00113  | 0        |
| P19827 | 0 | 0.8846 | 455.8996 | 1365.684 | 2.16  | 0.00098  | 27.66081 |
| P19827 | 0 | 0.6129 | 521.6267 | 1562.865 | 3.26  | 0.0017   | 27.20622 |
| P19827 | 0 | 0.6897 | 521.6246 | 1562.859 | -0.61 | -0.00032 | 0        |
| P19827 | 0 | 0.8039 | 521.6265 | 1562.865 | 2.91  | 0.00152  | 3.906552 |
| P19827 | 0 | 0.8667 | 521.6262 | 1562.864 | 2.44  | 0.00127  | 15.79935 |
| P19827 | 0 | 1      | 821.1016 | 2461.29  | 1.96  | 0.00161  | 5.867411 |
| P19827 | 0 | 1      | 767.7294 | 2301.174 | 1.38  | 0.00106  | 2.659213 |
| P19827 | 0 | 1      | 538.9471 | 1614.827 | 1.54  | 0.00083  | 35.01103 |
| P19827 | 0 | 1      | 541.2948 | 2162.157 | 2.58  | 0.0014   | 24.73973 |
| P19827 | 0 | 0.9701 | 617.3741 | 1850.108 | 2.56  | 0.00158  | 9.627854 |
| P19827 | 0 | 1      | 1151.091 | 2301.174 | 1.54  | 0.00178  | 0        |
| P19827 | 0 | 1      | 512.2834 | 1534.836 | 0.68  | 0.00035  | 0        |
| P19827 | 0 | 1      | 407.8647 | 1221.58  | 0.23  | 0.00009  | 57.65248 |
| P19827 | 0 | 0.7353 | 526.9575 | 1578.858 | 1.77  | 0.00093  | 29.93312 |
| P19827 | 0 | 0.5556 | 526.9578 | 1578.859 | 2.23  | 0.00118  | 11.36375 |
| P19827 | 0 | 1      | 461.2312 | 1381.679 | 1.93  | 0.00089  | 31.67815 |
| P19827 | 0 | 0.875  | 434.5826 | 1301.733 | 2.86  | 0.00124  | 8.967201 |
| P19827 | 0 | 0.9242 | 434.5827 | 1301.733 | 3.14  | 0.00136  | 20.19686 |
| P19827 | 0 | 0.814  | 668.678  | 2004.02  | 2.53  | 0.00169  | 9.587754 |
| P19827 | 0 | 0.7941 | 660.6072 | 2639.407 | -0.01 | -0.00001 | 6.559213 |
| P19827 | 0 | 0.7941 | 459.9383 | 1377.8   | 1.61  | 0.00074  | 49.88604 |
| P19827 | 0 | 0.6923 | 586.6691 | 1757.993 | 0.05  | 0.00003  | 28.33368 |
| P19827 | 0 | 0.5641 | 651.3696 | 1301.732 | 2     | 0.0013   | 10.39654 |
| P19827 | 0 | 0.9643 | 717.372  | 2150.101 | -4.55 | -0.00326 | 22.14915 |
| P19827 | 0 | 0.6333 | 586.6704 | 1757.996 | 2.13  | 0.00125  | 0        |
| P19827 | 0 | 1      | 695.8708 | 1390.734 | 1.29  | 0.0009   | 8.017869 |
| P19827 | 0 | 1      | 541.2936 | 2162.152 | 0.32  | 0.00018  | 21.67015 |
| P19827 | 0 | 0.8214 | 716.7107 | 2148.118 | 0.45  | 0.00032  | 20.02151 |
| P19827 | 0 | 1      | 768.0705 | 2302.197 | 2.67  | 0.00205  | 6.141106 |
| P19827 | 0 | 1      | 857.4502 | 3426.779 | 5.27  | 0.00452  | 24.66161 |
| P19827 | 0 | 1      | 669.3433 | 2006.015 | 3.1   | 0.00207  | 17.90654 |
| P19827 | 0 | 1      | 857.4487 | 3426.773 | 3.56  | 0.00305  | 3.807626 |
| P19827 | 0 | 1      | 413.1972 | 1237.577 | 2.29  | 0.00094  | 37.50584 |
| P19827 | 0 | 0.4545 | 651.3693 | 1301.731 | 1.53  | 0.001    | 3.310628 |

|        |   |        |          |          |       |          |          |
|--------|---|--------|----------|----------|-------|----------|----------|
| P19827 | 1 | 1      | 523.971  | 1569.898 | 1.42  | 0.00075  | 25.78511 |
| P19827 | 0 | 1      | 790.9399 | 1580.872 | 8.74  | 0.00691  | 80.02103 |
| P19827 | 0 | 0.1556 | 387.9087 | 1161.711 | 2.84  | 0.0011   | 11.47964 |
| P19827 | 0 | 1      | 790.9354 | 1580.863 | 3.02  | 0.00239  | 46.53669 |
| P19827 | 0 | 0.4483 | 669.3432 | 2006.015 | 3.01  | 0.00201  | 0        |
| P19827 | 0 | 0.6857 | 617.3533 | 1233.699 | 2.79  | 0.00172  | 100      |
| P19827 | 0 | 0.6923 | 669.3408 | 2006.008 | -0.64 | -0.00043 | 0        |
| P19827 | 0 | 0.95   | 660.609  | 2639.414 | 2.67  | 0.00176  | 8.209394 |
| P19827 | 1 | 0.913  | 564.3189 | 1690.942 | 3.84  | 0.00216  | 37.00291 |
| P19827 | 0 | 0.8333 | 716.711  | 2148.118 | 0.88  | 0.00063  | 7.836177 |
| P19827 | 0 | 0.9444 | 735.8668 | 1470.726 | 2.66  | 0.00196  | 0        |
| P19827 | 0 | 0.9032 | 454.2737 | 1360.807 | 2.09  | 0.00095  | 0        |
| P19827 | 0 | 1      | 538.2839 | 2150.114 | 1.21  | 0.00065  | 41.15789 |
| P19827 | 0 | 1      | 538.2839 | 2150.114 | 1.21  | 0.00065  | 14.89626 |
| P19827 | 0 | 0.3913 | 586.6699 | 1757.995 | 1.4   | 0.00082  | 7.913471 |
| P19827 | 0 | 1      | 413.1973 | 1237.577 | 2.51  | 0.00103  | 0        |
| P19827 | 0 | 1      | 512.2849 | 1534.84  | 3.66  | 0.00187  | 3.630345 |
| P19827 | 0 | 0.8667 | 660.6094 | 2639.416 | 3.23  | 0.00213  | 2.544646 |
| P19827 | 0 | 0.9444 | 669.3415 | 2006.01  | 0.45  | 0.0003   | 12.58709 |
| P19827 | 0 | 0.9565 | 1003.512 | 2006.016 | 3.62  | 0.00363  | 38.91499 |
| P19827 | 0 | 0.7895 | 689.4028 | 1377.798 | 0.18  | 0.00013  | 38.76474 |
| P19827 | 0 | 1      | 861.4435 | 3442.752 | -1.08 | -0.00093 | 53.56005 |
| P19827 | 0 | 0.9091 | 790.9343 | 1580.861 | 1.71  | 0.00135  | 42.16343 |
| P19827 | 0 | 1      | 880.4799 | 2639.425 | 6.77  | 0.00596  | 44.87915 |
| P01009 | 0 | 0.977  | 698.0612 | 2092.169 | 2.32  | 0.00162  | 5.433722 |
| P01009 | 0 | 1      | 782.7242 | 2346.158 | 3.83  | 0.00299  | 6.141326 |
| P01009 | 0 | 0.971  | 782.7229 | 2346.154 | 2.11  | 0.00165  | 5.524452 |
| P01009 | 0 | 1      | 782.7232 | 2346.155 | 2.5   | 0.00195  | 14.48193 |
| P01009 | 0 | 1      | 782.7235 | 2346.156 | 2.81  | 0.0022   | 0        |
| P01009 | 0 | 1      | 384.708  | 1535.81  | 2.5   | 0.00096  | 8.622455 |
| P01009 | 0 | 0.9111 | 512.6083 | 1535.81  | 2.59  | 0.00132  | 9.173017 |
| P01009 | 0 | 0.9091 | 512.6075 | 1535.808 | 1.04  | 0.00053  | 8.395659 |
| P01009 | 0 | 1      | 768.4086 | 1535.81  | 2.2   | 0.00169  | 6.984836 |
| P01009 | 0 | 0.9783 | 708.0489 | 2122.132 | 2.41  | 0.0017   | 6.271567 |
| P01009 | 0 | 1      | 517.9398 | 1551.805 | 2.14  | 0.00111  | 9.003087 |
| P01009 | 1 | 0.92   | 423.7341 | 1691.915 | 4.12  | 0.00174  | 58.0178  |
| P01009 | 0 | 0.9868 | 698.0613 | 2092.169 | 2.58  | 0.0018   | 4.925614 |
| P01009 | 0 | 0.9483 | 523.7976 | 2092.169 | 2.17  | 0.00113  | 6.05226  |
| P01009 | 0 | 1      | 698.061  | 2092.169 | 2.15  | 0.0015   | 4.687449 |
| P01009 | 0 | 0.9259 | 523.7976 | 2092.168 | 2.05  | 0.00107  | 6.546816 |
| P01009 | 0 | 0.931  | 523.7976 | 2092.168 | 2.05  | 0.00107  | 9.874651 |
| P01009 | 0 | 1      | 698.0612 | 2092.169 | 2.41  | 0.00168  | 20.87814 |
| P01009 | 0 | 0.9888 | 698.061  | 2092.169 | 2.15  | 0.0015   | 8.912704 |
| P01009 | 0 | 0.9167 | 523.7976 | 2092.168 | 2.05  | 0.00107  | 11.11422 |
| P01009 | 0 | 1      | 523.7973 | 2092.167 | 1.58  | 0.00083  | 10.89053 |
| P01009 | 0 | 0.5556 | 523.7982 | 2092.171 | 3.22  | 0.00168  | 14.33731 |
| P01009 | 0 | 0.7609 | 698.0609 | 2092.168 | 1.88  | 0.00131  | 9.910221 |
| P01009 | 0 | 1      | 523.797  | 2092.166 | 1     | 0.00052  | 14.32156 |
| P01009 | 0 | 0.9877 | 698.0608 | 2092.168 | 1.8   | 0.00125  | 10.55522 |
| P01009 | 0 | 0.931  | 523.7976 | 2092.168 | 2.05  | 0.00107  | 8.526839 |
| P01009 | 0 | 0.9483 | 523.7974 | 2092.168 | 1.7   | 0.00089  | 5.175604 |
| P01009 | 0 | 1      | 698.061  | 2092.168 | 2.06  | 0.00143  | 8.604578 |

|        |   |        |          |          |       |          |          |
|--------|---|--------|----------|----------|-------|----------|----------|
| P01009 | 0 | 0.95   | 523.7974 | 2092.168 | 1.82  | 0.00095  | 4.959618 |
| P01009 | 0 | 0.9802 | 698.061  | 2092.169 | 2.15  | 0.0015   | 4.42185  |
| P01009 | 0 | 0.9429 | 782.7212 | 2346.149 | -0.08 | -0.00006 | 38.86    |
| P01009 | 0 | 1      | 517.7491 | 2067.975 | 1.1   | 0.00057  | 4.4005   |
| P01009 | 0 | 1      | 414.4007 | 2067.975 | 1.1   | 0.00046  | 11.48153 |
| P01009 | 0 | 1      | 734.6884 | 2202.051 | 1.53  | 0.00112  | 9.848578 |
| P01009 | 0 | 1      | 734.6887 | 2202.051 | 1.95  | 0.00143  | 8.407268 |
| P01009 | 0 | 1      | 734.6893 | 2202.053 | 2.86  | 0.0021   | 7.605814 |
| P01009 | 0 | 0.6863 | 588.8593 | 1176.711 | 3.02  | 0.00178  | 4.365268 |
| P01009 | 0 | 1      | 414.4015 | 2067.978 | 2.88  | 0.00119  | 14.70936 |
| P01009 | 0 | 1      | 517.7499 | 2067.978 | 2.75  | 0.00142  | 0        |
| P01009 | 0 | 0.8235 | 512.6075 | 1535.808 | 1.04  | 0.00053  | 25.11739 |
| P01009 | 0 | 1      | 464.5734 | 1391.706 | 0.87  | 0.0004   | 27.96925 |
| P01009 | 0 | 1      | 464.5738 | 1391.707 | 1.79  | 0.00083  | 36.60539 |
| P01009 | 0 | 0.9167 | 699.9091 | 1398.811 | 1.86  | 0.0013   | 26.5344  |
| P01009 | 0 | 0.83   | 699.9085 | 1398.81  | 1.07  | 0.00075  | 6.723844 |
| P01009 | 0 | 1      | 849.7878 | 2547.349 | 1.85  | 0.00157  | 9.545839 |
| P01009 | 0 | 1      | 716.3893 | 2862.535 | -3.42 | -0.00245 | 44.16753 |
| P01009 | 0 | 0.7344 | 855.1213 | 2563.349 | 4.01  | 0.00343  | 13.23696 |
| P01009 | 0 | 0.9747 | 734.6877 | 2202.049 | 0.7   | 0.00051  | 1.286083 |
| P01009 | 0 | 1      | 414.401  | 2067.976 | 1.69  | 0.0007   | 9.884032 |
| P01009 | 0 | 0.7368 | 689.9969 | 2067.976 | 1.87  | 0.00129  | 12.52984 |
| P01009 | 0 | 0.9565 | 517.7493 | 2067.975 | 1.45  | 0.00075  | 13.57144 |
| P01009 | 0 | 1      | 414.4009 | 2067.975 | 1.55  | 0.00064  | 9.095506 |
| P01009 | 0 | 1      | 414.4011 | 2067.976 | 1.92  | 0.00079  | 5.651325 |
| P01009 | 0 | 0.9615 | 517.7497 | 2067.977 | 2.28  | 0.00118  | 21.97212 |
| P01009 | 0 | 1      | 517.749  | 2067.974 | 0.86  | 0.00044  | 6.118406 |
| P01009 | 0 | 1      | 517.7495 | 2067.976 | 1.92  | 0.00099  | 20.14589 |
| P01009 | 0 | 1      | 414.401  | 2067.976 | 1.84  | 0.00076  | 35.59876 |
| P01009 | 0 | 0.9545 | 689.9968 | 2067.976 | 1.69  | 0.00117  | 8.142431 |
| P01009 | 0 | 0.9535 | 689.9965 | 2067.975 | 1.34  | 0.00092  | 8.560637 |
| P01009 | 0 | 0.9355 | 727.3588 | 2180.062 | 1.01  | 0.00074  | 15.31083 |
| P01009 | 0 | 0.9167 | 727.3613 | 2180.069 | 4.37  | 0.00318  | 18.02864 |
| P01009 | 0 | 1      | 682.9161 | 1364.825 | 2.55  | 0.00174  | 37.2782  |
| P01009 | 0 | 0.8475 | 682.9161 | 1364.825 | 2.64  | 0.0018   | 9.894423 |
| P01009 | 0 | 0.9697 | 572.8274 | 2288.288 | 1.77  | 0.00101  | 5.600205 |
| P01009 | 0 | 1      | 763.434  | 2288.288 | 1.67  | 0.00127  | 10.15979 |
| P01009 | 0 | 0.8065 | 588.8605 | 1176.714 | 4.99  | 0.00294  | 6.339751 |
| P01009 | 0 | 0.9831 | 727.3611 | 2180.069 | 4.12  | 0.00299  | 0        |
| P01009 | 0 | 0.9355 | 727.3607 | 2180.067 | 3.53  | 0.00257  | 9.033413 |
| P01009 | 0 | 1      | 727.3593 | 2180.063 | 1.6   | 0.00116  | 4.105151 |
| P01009 | 0 | 0.9677 | 545.7716 | 2180.064 | 2.13  | 0.00116  | 17.75195 |
| P01009 | 0 | 1      | 727.3594 | 2180.064 | 1.77  | 0.00128  | 8.700187 |
| P01009 | 0 | 1      | 727.3601 | 2180.066 | 2.69  | 0.00196  | 8.861632 |
| P01009 | 0 | 0.9111 | 487.7713 | 1948.064 | 0.77  | 0.00037  | 4.733218 |
| P01009 | 0 | 0.8971 | 652.4141 | 1303.821 | 1.7   | 0.00111  | 7.254396 |
| P01009 | 0 | 0.8542 | 435.2784 | 1303.821 | 1.48  | 0.00064  | 10.96723 |
| P01009 | 0 | 0.9512 | 650.0268 | 1948.066 | 1.97  | 0.00128  | 0.507883 |
| P01009 | 0 | 0.9636 | 650.0267 | 1948.065 | 1.78  | 0.00115  | 6.154496 |
| P01009 | 0 | 0.9655 | 650.0266 | 1948.065 | 1.68  | 0.00109  | 8.665689 |
| P01009 | 0 | 0.8364 | 588.8594 | 1176.712 | 3.23  | 0.0019   | 14.02577 |
| P01009 | 0 | 0.8065 | 588.859  | 1176.711 | 2.5   | 0.00147  | 6.818508 |



|        |   |        |          |          |       |          |          |
|--------|---|--------|----------|----------|-------|----------|----------|
| P01009 | 0 | 0.8154 | 622.3547 | 1865.049 | 2.33  | 0.00145  | 11.06829 |
| P01009 | 1 | 1      | 793.4399 | 2378.305 | 2.21  | 0.00175  | 5.169472 |
| P01009 | 1 | 1      | 546.3451 | 1637.021 | 1.41  | 0.00077  | 13.22658 |
| P01009 | 1 | 0.8478 | 523.6396 | 1568.904 | 2.17  | 0.00114  | 34.55547 |
| P01009 | 0 | 1      | 893.488  | 1785.969 | 1.8   | 0.00161  | 19.74335 |
| P01009 | 0 | 1      | 572.8281 | 2288.291 | 3.05  | 0.00174  | 0        |
| P01009 | 0 | 0.8387 | 466.9416 | 1398.81  | 1.48  | 0.00069  | 10.98024 |
| P01009 | 0 | 0.8421 | 435.2776 | 1303.818 | -0.34 | -0.00015 | 0        |
| P01009 | 0 | 0.8448 | 648.8577 | 1296.708 | 3.39  | 0.0022   | 9.004613 |
| P01009 | 0 | 0.8667 | 587.293  | 2346.15  | 0.46  | 0.00027  | 0        |
| P01009 | 0 | 0.8983 | 580.364  | 1159.721 | 3.51  | 0.00203  | 24.51538 |
| P01009 | 0 | 0.9286 | 727.3615 | 2180.07  | 4.62  | 0.00336  | 4.089424 |
| P01009 | 0 | 1      | 689.9988 | 2067.982 | 4.7   | 0.00324  | 21.25354 |
| P01009 | 0 | 0.9655 | 517.9399 | 1551.805 | 2.38  | 0.00123  | 14.28182 |
| P01009 | 1 | 0.8966 | 595.332  | 2378.306 | 2.72  | 0.00162  | 5.649186 |
| P01009 | 0 | 0.9688 | 512.6078 | 1535.809 | 1.51  | 0.00078  | 19.15731 |
| P01009 | 0 | 0.8261 | 727.3598 | 2180.065 | 2.36  | 0.00171  | 7.234739 |
| P01009 | 0 | 1      | 517.9406 | 1551.807 | 3.79  | 0.00196  | 17.10749 |
| P01009 | 0 | 1      | 419.2385 | 2092.164 | -0.26 | -0.00011 | 18.0356  |
| P01009 | 0 | 0.7692 | 487.7715 | 1948.064 | 1.08  | 0.00053  | 23.69799 |
| P01009 | 0 | 0.9149 | 682.9153 | 1364.823 | 1.48  | 0.00101  | 15.09725 |
| P01009 | 0 | 0.8333 | 727.3598 | 2180.065 | 2.36  | 0.00171  | 6.33804  |
| P01009 | 1 | 0.9    | 423.7333 | 1691.912 | 2.32  | 0.00098  | 15.96248 |
| P01009 | 0 | 0.973  | 435.2784 | 1303.821 | 1.34  | 0.00058  | 2.534157 |
| P01009 | 1 | 1      | 427.7541 | 1707.995 | 2.36  | 0.00101  | 12.65208 |
| P01009 | 0 | 0.7895 | 516.8072 | 1032.607 | 1.32  | 0.00068  | 2.489809 |
| P01009 | 2 | 1      | 821.4711 | 4103.326 | 2.56  | 0.0021   | 54.49115 |
| P01009 | 0 | 0.9697 | 481.7244 | 1923.876 | 2.96  | 0.00142  | 22.51917 |
| P01009 | 1 | 0.9091 | 570.004  | 1707.997 | 3.94  | 0.00224  | 11.98104 |
| P01009 | 0 | 0.963  | 517.9395 | 1551.804 | 1.55  | 0.0008   | 2.921595 |
| P01009 | 0 | 1      | 512.6069 | 1535.806 | -0.27 | -0.00014 | 18.46076 |
| P01009 | 0 | 0.7059 | 466.942  | 1398.812 | 2.33  | 0.00108  | 2.619329 |
| P01009 | 1 | 0.9333 | 498.3108 | 1492.918 | 0.92  | 0.00046  | 56.97076 |
| P01009 | 1 | 0.9333 | 498.3108 | 1492.918 | 0.92  | 0.00046  | 56.97076 |
| P01009 | 0 | 1      | 782.7225 | 2346.153 | 1.64  | 0.00128  | 0        |
| P01009 | 0 | 0.9706 | 768.4095 | 1535.812 | 3.39  | 0.0026   | 0        |
| P01009 | 0 | 1      | 698.0629 | 2092.174 | 4.77  | 0.00333  | 46.18001 |
| P01009 | 0 | 1      | 517.9391 | 1551.803 | 0.84  | 0.00044  | 16.23649 |
| P01009 | 0 | 0.7727 | 487.7708 | 1948.062 | -0.23 | -0.00011 | 15.97938 |
| P01009 | 0 | 0.5536 | 534.3134 | 1067.62  | 3.19  | 0.0017   | 52.66739 |
| P01009 | 1 | 0.9048 | 564.6407 | 1691.908 | -0.05 | -0.00003 | 25.19209 |
| P01009 | 0 | 0.8788 | 679.3271 | 2035.967 | 4.45  | 0.00302  | 23.23125 |
| P01009 | 0 | 1      | 512.6085 | 1535.811 | 2.83  | 0.00145  | 49.13342 |
| P01009 | 0 | 1      | 517.7485 | 2067.972 | -0.08 | -0.00004 | 10.75574 |
| P01009 | 0 | 1      | 517.939  | 1551.802 | 0.61  | 0.00031  | 19.86617 |
| P01009 | 0 | 1      | 512.6079 | 1535.809 | 1.75  | 0.0009   | 35.8756  |
| P01009 | 0 | 0.9091 | 517.9392 | 1551.803 | 0.96  | 0.0005   | 0        |
| P01009 | 0 | 1      | 517.7513 | 2067.983 | 5.35  | 0.00276  | 18.78118 |
| P01009 | 0 | 0.6757 | 588.8591 | 1176.711 | 2.71  | 0.00159  | 9.181252 |
| P01009 | 1 | 1      | 551.6777 | 1653.018 | 3.11  | 0.00171  | 32.65193 |
| P01009 | 0 | 0.9167 | 517.7504 | 2067.98  | 3.69  | 0.00191  | 4.244313 |
| P01009 | 0 | 0.6786 | 380.9051 | 1140.701 | 2.47  | 0.00094  | 7.936327 |

|        |   |        |          |          |       |          |          |
|--------|---|--------|----------|----------|-------|----------|----------|
| P01009 | 0 | 0.6744 | 576.8069 | 1152.606 | 4.15  | 0.00239  | 9.460225 |
| P01009 | 0 | 0.4667 | 432.9063 | 1296.704 | 0.46  | 0.0002   | 0        |
| P01009 | 0 | 0.8148 | 380.9052 | 1140.701 | 2.63  | 0.001    | 11.21393 |
| P01009 | 0 | 1      | 469.9053 | 1407.701 | 1.44  | 0.00067  | 46.5127  |
| P01009 | 0 | 0.566  | 534.311  | 1067.615 | -1.27 | -0.00068 | 0        |
| P01009 | 0 | 0.6047 | 534.3125 | 1067.618 | 1.48  | 0.00079  | 0        |
| P01009 | 0 | 0.8889 | 481.7241 | 1923.875 | 2.33  | 0.00112  | 0        |
| P01009 | 0 | 1      | 734.6887 | 2202.052 | 2.03  | 0.00149  | 10.25356 |
| P01009 | 0 | 0.5909 | 534.313  | 1067.619 | 2.39  | 0.00128  | 43.99587 |
| P01009 | 0 | 1      | 464.5738 | 1391.707 | 1.72  | 0.0008   | 15.97469 |
| P01009 | 0 | 0.9231 | 460.2635 | 1378.776 | 2.68  | 0.00123  | 14.56658 |
| P01009 | 0 | 0.7917 | 380.9053 | 1140.701 | 3.03  | 0.00115  | 0        |
| P01009 | 0 | 0.8621 | 679.3259 | 2035.963 | 2.65  | 0.0018   | 0        |
| P01009 | 0 | 0.9375 | 481.7244 | 1923.876 | 2.83  | 0.00136  | 27.36067 |
| P01009 | 0 | 1      | 580.3643 | 1159.721 | 3.93  | 0.00228  | 29.44305 |
| P01009 | 0 | 0.75   | 588.8596 | 1176.712 | 3.43  | 0.00202  | 48.50661 |
| P01009 | 0 | 0.9444 | 517.94   | 1551.805 | 2.61  | 0.00135  | 66.69722 |
| P01009 | 0 | 1      | 460.263  | 1378.774 | 1.61  | 0.00074  | 65.71242 |
| P01009 | 0 | 0.7143 | 380.9054 | 1140.702 | 3.35  | 0.00127  | 18.26698 |
| P01009 | 0 | 0.6111 | 387.2445 | 1159.719 | 2.05  | 0.00079  | 0        |
| P01009 | 0 | 0.8929 | 734.6871 | 2202.047 | -0.13 | -0.0001  | 43.43968 |
| P01009 | 0 | 0.6444 | 542.311  | 1083.615 | 3.33  | 0.0018   | 8.749046 |
| P01009 | 0 | 0.62   | 534.3124 | 1067.618 | 1.36  | 0.00073  | 14.71317 |
| P01009 | 0 | 1      | 481.7239 | 1923.874 | 1.76  | 0.00084  | 19.45606 |
| P01009 | 0 | 1      | 460.2625 | 1378.773 | 0.48  | 0.00022  | 13.02051 |
| P01009 | 0 | 0.6078 | 534.3148 | 1067.622 | 5.71  | 0.00305  | 12.7456  |
| P01009 | 0 | 0.6316 | 517.9397 | 1551.805 | 2.02  | 0.00105  | 9.649161 |
| P01009 | 0 | 1      | 512.6086 | 1535.811 | 3.18  | 0.00163  | 18.42324 |
| P01009 | 0 | 0.5938 | 570.8543 | 1140.701 | 2.91  | 0.00166  | 10.23295 |
| P01009 | 0 | 0.7727 | 517.94   | 1551.805 | 2.61  | 0.00135  | 7.889136 |
| P01009 | 0 | 1      | 460.263  | 1378.774 | 1.68  | 0.00077  | 10.6939  |
| P01009 | 0 | 0.85   | 517.9397 | 1551.805 | 2.02  | 0.00105  | 36.80188 |
| P01009 | 0 | 1      | 460.2644 | 1378.779 | 4.67  | 0.00215  | 27.10742 |
| P01009 | 0 | 0.6875 | 587.2951 | 2346.159 | 4     | 0.00235  | 20.28561 |
| P01009 | 1 | 0.9375 | 564.6428 | 1691.914 | 3.73  | 0.00211  | 0        |
| P01009 | 0 | 0.5    | 466.9423 | 1398.812 | 2.92  | 0.00136  | 6.061275 |
| P01009 | 0 | 0.6207 | 570.8543 | 1140.701 | 2.91  | 0.00166  | 0        |
| P01009 | 0 | 0.9091 | 517.9396 | 1551.804 | 1.9   | 0.00099  | 5.780658 |
| P01009 | 0 | 1      | 641.9638 | 1923.877 | 3.48  | 0.00223  | 0        |
| P01009 | 0 | 0.7222 | 588.8605 | 1176.714 | 5.09  | 0.003    | 0        |
| P01009 | 0 | 0.64   | 699.9097 | 1398.812 | 2.73  | 0.00191  | 15.97701 |
| P01009 | 0 | 0.9474 | 517.9407 | 1551.807 | 3.91  | 0.00202  | 16.26337 |
| P01009 | 0 | 0.5714 | 542.3112 | 1083.615 | 3.78  | 0.00205  | 0        |
| P01009 | 0 | 0.75   | 460.2631 | 1378.775 | 1.81  | 0.00083  | 18.47471 |
| P01009 | 0 | 0.8421 | 517.9398 | 1551.805 | 2.26  | 0.00117  | 0        |
| P01009 | 0 | 0.75   | 782.7217 | 2346.15  | 0.55  | 0.00043  | 60.65384 |
| P01009 | 0 | 0.7143 | 414.4016 | 2067.979 | 3.24  | 0.00134  | 19.46744 |
| P01009 | 0 | 0.7273 | 380.9052 | 1140.701 | 2.71  | 0.00103  | 15.84191 |
| P01009 | 0 | 0.9231 | 517.9398 | 1551.805 | 2.14  | 0.00111  | 19.50717 |
| P01009 | 0 | 0.5    | 487.7712 | 1948.063 | 0.45  | 0.00022  | 24.09866 |
| P01009 | 0 | 1      | 481.7243 | 1923.875 | 2.71  | 0.0013   | 49.24791 |
| P01009 | 0 | 0.8421 | 517.9405 | 1551.807 | 3.56  | 0.00184  | 60.73491 |

|        |   |        |          |          |       |          |          |
|--------|---|--------|----------|----------|-------|----------|----------|
| P01009 | 0 | 0.9375 | 698.0612 | 2092.169 | 2.41  | 0.00168  | 62.37026 |
| P00734 | 0 | 1      | 513.96   | 1539.866 | 2.24  | 0.00115  | 49.76067 |
| P00734 | 0 | 1      | 770.4363 | 1539.865 | 2.17  | 0.00167  | 6.47825  |
| P00734 | 0 | 0.95   | 513.9602 | 1539.866 | 2.59  | 0.00133  | 8.753925 |
| P00734 | 1 | 1      | 859.423  | 2576.254 | 1.71  | 0.00147  | 4.394521 |
| P00734 | 1 | 1      | 859.4229 | 2576.254 | 1.56  | 0.00134  | 2.067361 |
| P00734 | 1 | 1      | 859.4241 | 2576.258 | 2.99  | 0.00256  | 6.401958 |
| P00734 | 0 | 1      | 760.0465 | 2278.125 | 1.84  | 0.0014   | 11.75831 |
| P00734 | 0 | 1      | 570.2874 | 2278.128 | 3.09  | 0.00176  | 6.360729 |
| P00734 | 0 | 1      | 760.0465 | 2278.125 | 1.76  | 0.00133  | 5.774871 |
| P00734 | 1 | 1      | 644.8192 | 2576.255 | 1.96  | 0.00126  | 2.082619 |
| P00734 | 0 | 0.8043 | 646.8308 | 1292.654 | 0.35  | 0.00023  | 3.333771 |
| P00734 | 0 | 0.7925 | 431.557  | 1292.656 | 2.09  | 0.0009   | 5.480378 |
| P00734 | 1 | 1      | 859.4225 | 2576.253 | 1.14  | 0.00098  | 2.029225 |
| P00734 | 0 | 0.8246 | 569.283  | 1705.835 | 2.52  | 0.00143  | 12.54033 |
| P00734 | 0 | 1      | 853.4199 | 1705.833 | 1.38  | 0.00118  | 2.980192 |
| P00734 | 0 | 1      | 705.0024 | 2112.993 | 0.23  | 0.00016  | 18.14559 |
| P00734 | 0 | 1      | 705.0033 | 2112.995 | 1.44  | 0.00102  | 2.599225 |
| P00734 | 0 | 1      | 1057.002 | 2112.997 | 2.06  | 0.00217  | 3.483287 |
| P00734 | 0 | 1      | 705.0029 | 2112.994 | 0.84  | 0.00059  | 2.48871  |
| P00734 | 0 | 1      | 781.369  | 1561.731 | 1.6   | 0.00125  | 0        |
| P00734 | 0 | 0.931  | 669.855  | 1338.703 | 0.39  | 0.00026  | 3.307719 |
| P00734 | 0 | 0.6863 | 669.8559 | 1338.705 | 1.76  | 0.00118  | 6.121565 |
| P00734 | 0 | 1      | 767.0202 | 2299.046 | 1.88  | 0.00144  | 3.114969 |
| P00734 | 0 | 0.9365 | 1108.044 | 2215.082 | 1.57  | 0.00173  | 0        |
| P00734 | 0 | 1      | 739.0319 | 2215.081 | 1.31  | 0.00097  | 2.722798 |
| P00734 | 0 | 1      | 445.2326 | 1333.683 | 1.72  | 0.00076  | 17.18909 |
| P00734 | 1 | 1      | 864.7549 | 2592.25  | 2.08  | 0.0018   | 2.556294 |
| P00734 | 0 | 1      | 703.3452 | 2108.021 | 5.27  | 0.0037   | 31.528   |
| P00734 | 0 | 0.8367 | 581.8462 | 1162.685 | 2.45  | 0.00143  | 4.296452 |
| P00734 | 0 | 1      | 576.3145 | 2302.236 | 4.61  | 0.00265  | 39.08431 |
| P00734 | 0 | 1      | 576.3131 | 2302.231 | 2.17  | 0.00125  | 4.791936 |
| P00734 | 0 | 0.9778 | 768.0817 | 2302.23  | 2.09  | 0.00161  | 5.875336 |
| P00734 | 0 | 1      | 576.3126 | 2302.228 | 1.21  | 0.0007   | 4.861984 |
| P00734 | 0 | 1      | 768.081  | 2302.228 | 1.22  | 0.00094  | 7.864848 |
| P00734 | 0 | 1      | 527.7585 | 2108.012 | 1.01  | 0.00053  | 1.476094 |
| P00734 | 0 | 1      | 895.4666 | 1789.926 | 1.39  | 0.00125  | 3.182745 |
| P00734 | 0 | 0.9444 | 597.3143 | 1789.928 | 2.68  | 0.0016   | 5.261855 |
| P00734 | 0 | 0.9726 | 703.3425 | 2108.013 | 1.45  | 0.00102  | 2.325186 |
| P00734 | 0 | 1      | 655.3092 | 1963.913 | 2.62  | 0.00171  | 20.78196 |
| P00734 | 0 | 1      | 703.3394 | 2108.004 | -2.98 | -0.0021  | 0        |
| P00734 | 0 | 0.7959 | 597.3126 | 1789.923 | -0.08 | -0.00005 | 0        |
| P00734 | 0 | 0.9718 | 703.3427 | 2108.013 | 1.62  | 0.00114  | 3.511152 |
| P00734 | 1 | 0.9851 | 688.0467 | 2062.126 | 2.44  | 0.00168  | 7.226352 |
| P00734 | 1 | 0.9773 | 1031.566 | 2062.124 | 1.74  | 0.00179  | 0        |
| P00734 | 1 | 1      | 516.2864 | 2062.124 | 1.55  | 0.0008   | 8.826856 |
| P00734 | 1 | 0.987  | 688.0452 | 2062.121 | 0.22  | 0.00015  | 8.166163 |
| P00734 | 1 | 0.9219 | 516.286  | 2062.122 | 0.84  | 0.00043  | 4.71712  |
| P00734 | 1 | 0.963  | 688.0465 | 2062.125 | 2.09  | 0.00143  | 20.99533 |
| P00734 | 1 | 0.8519 | 640.0125 | 1918.023 | 2.38  | 0.00152  | 2.811429 |
| P00734 | 1 | 0.9057 | 640.0141 | 1918.028 | 4.86  | 0.00311  | 2.680002 |
| P00734 | 1 | 0.9057 | 640.0141 | 1918.028 | 4.86  | 0.00311  | 2.680002 |

|        |   |        |          |          |       |         |          |
|--------|---|--------|----------|----------|-------|---------|----------|
| P00734 | 1 | 0.8519 | 640.0125 | 1918.023 | 2.38  | 0.00152 | 2.811429 |
| P00734 | 0 | 1      | 853.4196 | 1705.832 | 0.95  | 0.00081 | 3.597428 |
| P00734 | 0 | 0.875  | 569.2823 | 1705.832 | 1.23  | 0.0007  | 4.208252 |
| P00734 | 0 | 1      | 543.7813 | 2172.103 | 1.69  | 0.00092 | 0        |
| P00734 | 0 | 1      | 724.7054 | 2172.102 | 0.93  | 0.00068 | 5.923318 |
| P00734 | 0 | 1      | 676.6718 | 2028.001 | 1.58  | 0.00107 | 2.497174 |
| P00734 | 0 | 1      | 724.7058 | 2172.103 | 1.44  | 0.00104 | 4.902156 |
| P00734 | 0 | 1      | 543.7815 | 2172.104 | 2.02  | 0.0011  | 14.46146 |
| P00734 | 1 | 1      | 609.3127 | 2434.229 | 2.88  | 0.00175 | 14.84324 |
| P00734 | 0 | 1      | 504.8974 | 2520.458 | 0.13  | 0.00007 | 4.606958 |
| P00734 | 0 | 0.9839 | 630.8705 | 2520.46  | 1.07  | 0.00067 | 4.616477 |
| P00734 | 0 | 0.9487 | 840.825  | 2520.46  | 1.22  | 0.00102 | 4.698193 |
| P00734 | 0 | 0.9744 | 605.6158 | 1814.833 | 2.12  | 0.00128 | 46.89226 |
| P00734 | 0 | 1      | 907.9196 | 1814.832 | 1.56  | 0.00141 | 6.731294 |
| P00734 | 0 | 1      | 605.6163 | 1814.834 | 2.83  | 0.00171 | 8.451031 |
| P00734 | 0 | 0.9615 | 835.8682 | 1670.729 | 1.26  | 0.00105 | 0        |
| P00734 | 0 | 1      | 668.6349 | 2003.89  | 2.04  | 0.00136 | 27.87104 |
| P00734 | 0 | 0.9255 | 739.0323 | 2215.082 | 1.89  | 0.0014  | 35.10147 |
| P00734 | 0 | 0.9519 | 690.9977 | 2070.979 | 1.26  | 0.00087 | 0        |
| P00734 | 0 | 0.7397 | 597.8055 | 1194.604 | 3.11  | 0.00186 | 0        |
| P00734 | 0 | 1      | 703.3422 | 2108.012 | 0.93  | 0.00065 | 8.029567 |
| P00734 | 0 | 1      | 1035.993 | 2070.979 | 1.33  | 0.00137 | 1.041664 |
| P00734 | 0 | 0.9221 | 1108.045 | 2215.082 | 1.68  | 0.00186 | 0.448723 |
| P00734 | 0 | 0.9506 | 739.0313 | 2215.079 | 0.49  | 0.00036 | 2.463844 |
| P00734 | 0 | 0.9516 | 690.9977 | 2070.978 | 1.17  | 0.00081 | 8.762603 |
| P00734 | 0 | 1      | 994.451  | 1987.895 | 1.8   | 0.00179 | 1.049487 |
| P00734 | 0 | 1      | 663.3029 | 1987.894 | 1.46  | 0.00097 | 2.437717 |
| P00734 | 0 | 1      | 663.3027 | 1987.893 | 1.18  | 0.00078 | 27.02884 |
| P00734 | 0 | 1      | 610.9478 | 1830.829 | 2.65  | 0.00162 | 12.4272  |
| P00734 | 1 | 0.9474 | 657.65   | 1970.935 | 2.59  | 0.0017  | 6.036096 |
| P00734 | 1 | 1      | 493.4888 | 1970.933 | 1.53  | 0.00075 | 7.657181 |
| P00734 | 0 | 0.9286 | 753.4078 | 2258.209 | 2.45  | 0.00184 | 13.15956 |
| P00734 | 0 | 1      | 610.9472 | 1830.827 | 1.65  | 0.001   | 18.44653 |
| P00734 | 0 | 0.8571 | 565.3051 | 2258.199 | -2.12 | -0.0012 | 0        |
| P00734 | 0 | 1      | 1205.109 | 2409.211 | 1.84  | 0.00222 | 0        |
| P00734 | 0 | 1      | 698.3842 | 1395.761 | 0.82  | 0.00058 | 0        |
| P00734 | 0 | 1      | 576.3134 | 2302.232 | 2.59  | 0.00149 | 3.996655 |
| P00734 | 0 | 1      | 761.7562 | 2283.254 | 0.78  | 0.00059 | 8.970378 |
| P00734 | 0 | 0.9787 | 571.5687 | 2283.253 | 0.29  | 0.00017 | 4.838962 |
| P00734 | 0 | 0.8923 | 713.7227 | 2139.153 | 1.55  | 0.0011  | 35.75386 |
| P00734 | 0 | 0.9714 | 576.3151 | 2302.238 | 5.56  | 0.0032  | 13.1512  |
| P00734 | 0 | 0.9429 | 513.9597 | 1539.865 | 1.64  | 0.00084 | 9.704891 |
| P00734 | 1 | 0.8571 | 644.8188 | 2576.253 | 1.3   | 0.00084 | 37.07825 |
| P00734 | 0 | 0.7812 | 509.7947 | 1018.582 | 1.85  | 0.00094 | 0        |
| P00734 | 0 | 0.8824 | 739.0329 | 2215.084 | 2.72  | 0.00201 | 68.18793 |
| P00734 | 0 | 0.7963 | 581.8447 | 1162.682 | -0.17 | -0.0001 | 5.742953 |
| P00734 | 0 | 1      | 676.6728 | 2028.004 | 3.02  | 0.00204 | 3.791553 |
| P00734 | 1 | 0.8824 | 688.0481 | 2062.13  | 4.49  | 0.00308 | 34.32111 |
| P00734 | 0 | 1      | 630.8732 | 2520.471 | 5.33  | 0.00336 | 49.17168 |
| P00734 | 0 | 0.92   | 703.3426 | 2108.013 | 1.53  | 0.00108 | 26.67206 |
| P00734 | 0 | 0.6857 | 575.3061 | 1149.605 | 2.49  | 0.00143 | 11.07978 |
| P00734 | 0 | 0.7    | 431.5569 | 1292.656 | 1.73  | 0.00075 | 0        |

|        |   |        |          |          |       |          |          |
|--------|---|--------|----------|----------|-------|----------|----------|
| P00734 | 0 | 1      | 610.949  | 1830.832 | 4.55  | 0.00277  | 40.37957 |
| P00734 | 0 | 1      | 610.9483 | 1830.83  | 3.45  | 0.0021   | 29.62363 |
| P00734 | 0 | 1      | 669.8556 | 1338.704 | 1.31  | 0.00087  | 42.91862 |
| P00734 | 0 | 0.8431 | 647.3538 | 1293.7   | -2.9  | -0.00187 | 31.49639 |
| P00734 | 0 | 1      | 668.6356 | 2003.892 | 3.13  | 0.00209  | 23.29771 |
| P00734 | 0 | 0.7903 | 509.7946 | 1018.582 | 1.73  | 0.00088  | 3.200408 |
| P00734 | 0 | 1      | 397.1983 | 1189.58  | 1.3   | 0.00051  | 28.84335 |
| P00734 | 0 | 1      | 705      | 2112.985 | -3.24 | -0.00228 | 69.70944 |
| P00734 | 0 | 1      | 663.3024 | 1987.893 | 0.82  | 0.00054  | 65.98457 |
| P00734 | 0 | 0.9444 | 570.2867 | 2278.125 | 1.91  | 0.00109  | 0        |
| P00734 | 0 | 0.8864 | 509.7953 | 1018.583 | 2.99  | 0.00152  | 6.146496 |
| P00734 | 0 | 0.7083 | 581.8462 | 1162.685 | 2.45  | 0.00143  | 25.93431 |
| P00734 | 0 | 0.8611 | 558.2686 | 1115.53  | 2.39  | 0.00133  | 2.790368 |
| P00734 | 0 | 1      | 513.9605 | 1539.867 | 3.19  | 0.00164  | 0        |
| P00734 | 0 | 0.9048 | 739.0341 | 2215.088 | 4.37  | 0.00323  | 0        |
| P00734 | 0 | 0.7895 | 509.7953 | 1018.583 | 2.99  | 0.00152  | 5.348005 |
| P00734 | 0 | 0.7273 | 581.8453 | 1162.683 | 0.88  | 0.00051  | 62.92154 |
| P00734 | 0 | 0.6522 | 540.2882 | 2158.131 | 3.34  | 0.0018   | 5.673255 |
| P00734 | 0 | 0.6522 | 540.2882 | 2158.131 | 3.34  | 0.0018   | 5.673255 |
| P00734 | 0 | 1      | 574.2844 | 2294.116 | 0.07  | 0.00004  | 20.45494 |
| P00734 | 0 | 0.8298 | 581.8462 | 1162.685 | 2.45  | 0.00143  | 62.14581 |
| P00734 | 0 | 1      | 576.3115 | 2302.224 | -0.59 | -0.00034 | 0        |
| P00734 | 0 | 0.8824 | 739.0336 | 2215.086 | 3.71  | 0.00274  | 27.80495 |
| P00734 | 0 | 0.0417 | 388.2329 | 1162.684 | 1.73  | 0.00067  | 9.63743  |
| P00734 | 0 | 0.8889 | 570.2893 | 2278.135 | 6.41  | 0.00365  | 12.01935 |
| P00734 | 0 | 0.7333 | 753.4132 | 2258.225 | 9.5   | 0.00715  | 54.92905 |
| P00734 | 0 | 1      | 513.9604 | 1539.867 | 2.95  | 0.00151  | 33.1649  |
| P00734 | 0 | 0.7727 | 669.8563 | 1338.705 | 2.31  | 0.00155  | 69.71092 |
| P00734 | 0 | 1      | 605.6157 | 1814.832 | 1.82  | 0.0011   | 33.17545 |
| P00734 | 0 | 0.7857 | 461.2517 | 2302.229 | 1.59  | 0.00073  | 12.70343 |
| P00734 | 1 | 0.8333 | 688.0462 | 2062.124 | 1.73  | 0.00119  | 42.66354 |
| P00734 | 0 | 0.9143 | 558.2693 | 1115.531 | 3.7   | 0.00206  | 12.96578 |
| P00734 | 0 | 1      | 767.021  | 2299.048 | 2.91  | 0.00223  | 62.64981 |
| P10643 | 0 | 1      | 1036.144 | 3106.418 | 2.19  | 0.00227  | 2.642919 |
| P10643 | 0 | 1      | 777.359  | 3106.414 | 0.79  | 0.00062  | 50.86609 |
| P10643 | 0 | 1      | 525.9396 | 1575.804 | 1.76  | 0.00092  | 28.08379 |
| P10643 | 0 | 0.7368 | 469.9095 | 1407.714 | 1.69  | 0.00079  | 12.52279 |
| P10643 | 0 | 0.9697 | 427.8866 | 1281.645 | 2.14  | 0.00092  | 14.3509  |
| P10643 | 0 | 1      | 724.3167 | 2170.935 | 1.39  | 0.001    | 26.63113 |
| P10643 | 0 | 0.9792 | 638.9906 | 1914.957 | 3.28  | 0.0021   | 0        |
| P10643 | 0 | 1      | 801.0701 | 2401.196 | 2.17  | 0.00173  | 2.03494  |
| P10643 | 0 | 0.9077 | 682.4271 | 1363.847 | 2.25  | 0.00154  | 10.14361 |
| P10643 | 0 | 0.9062 | 682.4254 | 1363.843 | -0.34 | -0.00023 | 8.723853 |
| P10643 | 0 | 0.8462 | 694.3905 | 1387.774 | 1.87  | 0.0013   | 8.763278 |
| P10643 | 0 | 1      | 525.9394 | 1575.804 | 1.41  | 0.00074  | 20.85897 |
| P10643 | 0 | 1      | 801.0695 | 2401.194 | 1.48  | 0.00118  | 2.164092 |
| P10643 | 0 | 1      | 653.3319 | 1957.981 | 1.82  | 0.00119  | 2.687197 |
| P10643 | 0 | 0.9394 | 733.8752 | 1466.743 | 2.25  | 0.00165  | 6.70365  |
| P10643 | 0 | 1      | 489.586  | 1466.743 | 2.35  | 0.00115  | 18.54493 |
| P10643 | 0 | 0.8824 | 401.9623 | 1604.827 | 0.21  | 0.00008  | 67.14551 |
| P10643 | 0 | 0.9048 | 637.8518 | 1274.696 | 2.36  | 0.00151  | 3.344769 |
| P10643 | 0 | 0.8367 | 425.5698 | 1274.695 | 1.25  | 0.00053  | 19.06293 |

|            |   |        |          |          |       |          |          |
|------------|---|--------|----------|----------|-------|----------|----------|
| P10643     | 0 | 1      | 644.3236 | 1930.956 | 5.38  | 0.00347  | 0        |
| P10643     | 0 | 1      | 582.0019 | 1743.991 | 1.6   | 0.00093  | 7.38562  |
| P10643     | 0 | 0.9818 | 698.7225 | 2094.153 | 2.63  | 0.00184  | 0        |
| P10643     | 0 | 0.9348 | 698.7224 | 2094.153 | 2.46  | 0.00172  | 100      |
| P10643     | 0 | 0.9733 | 907.1173 | 2719.337 | 1.06  | 0.00096  | 0        |
| P10643     | 0 | 1      | 672.7707 | 3359.824 | 0.71  | 0.00048  | 23.96056 |
| P10643     | 0 | 1      | 542.5854 | 1625.742 | 2.24  | 0.00121  | 31.23117 |
| P10643     | 0 | 1      | 813.3738 | 1625.74  | 1.42  | 0.00116  | 1.472206 |
| P10643     | 0 | 1      | 542.5847 | 1625.739 | 0.89  | 0.00048  | 4.334108 |
| P10643     | 0 | 0.9231 | 813.3736 | 1625.74  | 1.2   | 0.00097  | 3.400315 |
| P10643     | 1 | 1      | 563.3205 | 2250.26  | 5.2   | 0.00292  | 55.59766 |
| P10643     | 0 | 0.9167 | 542.5851 | 1625.741 | 1.79  | 0.00097  | 13.58461 |
| P10643     | 0 | 1      | 531.2704 | 1591.797 | 0.18  | 0.0001   | 24.6174  |
| P10643     | 0 | 1      | 641.3257 | 1281.644 | 1.25  | 0.0008   | 2.998437 |
| P10643     | 0 | 1      | 653.3331 | 1957.985 | 3.6   | 0.00235  | 56.40202 |
| P10643     | 0 | 0.8056 | 455.287  | 1363.847 | 1.91  | 0.00087  | 9.55512  |
| P10643     | 0 | 1      | 698.2927 | 1395.578 | 2.24  | 0.00156  | 14.00042 |
| P10643; Q1 | 0 | 0.3182 | 552.8297 | 1104.652 | 1.58  | 0.00087  | 37.41586 |
| P10643     | 0 | 1      | 840.7129 | 3359.83  | 2.31  | 0.00194  | 4.799808 |
| P10643     | 0 | 1      | 394.707  | 1575.806 | 2.95  | 0.00116  | 0        |
| P10643     | 0 | 0.5429 | 650.6876 | 1950.048 | 1.55  | 0.00101  | 3.61094  |
| P10643     | 0 | 0.9778 | 622.3403 | 1243.673 | 3.48  | 0.00216  | 12.59542 |
| P10643     | 0 | 0.7241 | 499.9193 | 1497.743 | 0.75  | 0.00038  | 5.025897 |
| P10643     | 0 | 0.7333 | 393.2219 | 1177.651 | 1.81  | 0.00071  | 14.51093 |
| P10643     | 0 | 0.95   | 411.2618 | 1231.771 | 1.68  | 0.00069  | 37.88374 |
| P10643     | 0 | 1      | 555.7857 | 1110.564 | 3.34  | 0.00185  | 0        |
| P10643     | 0 | 0.5556 | 704.3622 | 1407.717 | 4.04  | 0.00284  | 3.339082 |
| P10643     | 0 | 1      | 821.3718 | 1641.736 | 2.13  | 0.00175  | 0        |
| P10643     | 0 | 0.7188 | 667.879  | 1334.751 | 3.64  | 0.00243  | 0        |
| P10643     | 0 | 1      | 547.9149 | 1641.73  | -1.63 | -0.00089 | 14.22023 |
| P10643     | 0 | 0.9286 | 445.5875 | 1334.748 | 1.58  | 0.0007   | 36.26385 |
| P10643; Q1 | 0 | 0.1795 | 552.8323 | 1104.657 | 6.33  | 0.00349  | 14.71871 |
| P10643     | 0 | 1      | 445.5876 | 1334.748 | 1.78  | 0.00079  | 47.78157 |
| P10643     | 0 | 0.88   | 489.5856 | 1466.742 | 1.54  | 0.00075  | 9.343733 |
| P10643     | 0 | 1      | 813.3751 | 1625.743 | 3     | 0.00244  | 45.85756 |
| P01008     | 1 | 1      | 655.0224 | 1963.053 | 2.01  | 0.00132  | 8.555601 |
| P01008     | 1 | 1      | 558.9554 | 1674.852 | 4.19  | 0.00234  | 6.044933 |
| P01008     | 1 | 1      | 472.2924 | 1414.863 | 0.49  | 0.00023  | 3.490838 |
| P01008     | 0 | 1      | 1069.066 | 2137.125 | 7.66  | 0.00819  | 22.66182 |
| P01008     | 0 | 0.9091 | 713.0447 | 2137.12  | 5.03  | 0.00358  | 12.47531 |
| P01008     | 0 | 0.7727 | 665.0089 | 1993.012 | 2.67  | 0.00178  | 5.004417 |
| P01008     | 0 | 0.9209 | 997.0103 | 1993.013 | 3.26  | 0.00325  | 7.580603 |
| P01008     | 0 | 1      | 461.228  | 1381.67  | 0.73  | 0.00034  | 11.10926 |
| P01008     | 1 | 0.9773 | 551.9613 | 1653.869 | 2.31  | 0.00127  | 12.91835 |
| P01008     | 0 | 0.625  | 713.0425 | 2137.113 | 1.86  | 0.00132  | 0        |
| P01008     | 0 | 0.975  | 459.6146 | 1376.829 | 0.67  | 0.00031  | 2.431956 |
| P01008     | 0 | 0.7368 | 459.6141 | 1376.828 | -0.39 | -0.00018 | 4.859914 |
| P01008     | 0 | 0.8864 | 606.322  | 1816.951 | 2.27  | 0.00138  | 65.34048 |
| P01008     | 1 | 1      | 472.2929 | 1414.864 | 1.59  | 0.00075  | 7.565009 |
| P01008     | 1 | 1      | 472.2932 | 1414.865 | 2.17  | 0.00103  | 53.76545 |
| P01008     | 0 | 1      | 691.3391 | 1381.671 | 1.76  | 0.00122  | 8.470169 |
| P01008     | 1 | 0.0208 | 424.2588 | 1270.762 | 1.4   | 0.00059  | 15.20503 |

|        |   |        |          |          |       |          |          |
|--------|---|--------|----------|----------|-------|----------|----------|
| P01008 | 0 | 0.9492 | 558.2877 | 1672.849 | 2.08  | 0.00116  | 4.363789 |
| P01008 | 0 | 0.878  | 558.2885 | 1672.851 | 3.39  | 0.00189  | 8.292937 |
| P01008 | 1 | 0.98   | 551.9605 | 1653.867 | 0.76  | 0.00042  | 6.685843 |
| P01008 | 0 | 0.9444 | 777.3744 | 1553.742 | 1.3   | 0.00101  | 3.103992 |
| P01008 | 0 | 0.9385 | 606.3212 | 1816.949 | 0.96  | 0.00058  | 8.578529 |
| P01008 | 0 | 0.96   | 454.9929 | 1816.95  | 1.33  | 0.0006   | 8.737457 |
| P01008 | 0 | 0.9375 | 908.9791 | 1816.951 | 2.01  | 0.00183  | 5.757835 |
| P01008 | 0 | 0.931  | 606.3209 | 1816.948 | 0.56  | 0.00034  | 7.967163 |
| P01008 | 0 | 0.9362 | 495.594  | 1484.767 | 1.35  | 0.00067  | 6.22054  |
| P01008 | 0 | 0.9714 | 543.6278 | 1628.869 | 0.85  | 0.00046  | 18.1036  |
| P01008 | 0 | 0.8727 | 814.9382 | 1628.869 | 0.97  | 0.00079  | 9.03714  |
| P01008 | 0 | 0.8718 | 543.6282 | 1628.87  | 1.52  | 0.00083  | 8.595205 |
| P01008 | 0 | 0.8511 | 814.9373 | 1628.867 | -0.08 | -0.00007 | 0        |
| P01008 | 0 | 0.9167 | 543.6282 | 1628.87  | 1.63  | 0.00089  | 38.73887 |
| P01008 | 0 | 1      | 691.3387 | 1381.67  | 1.14  | 0.00079  | 8.002794 |
| P01008 | 1 | 1      | 625.7056 | 1875.102 | 4.24  | 0.00265  | 13.23384 |
| P01008 | 0 | 0.807  | 528.3209 | 1055.635 | 1.53  | 0.00081  | 16.72213 |
| P01008 | 0 | 0.825  | 718.3738 | 2153.107 | 1.37  | 0.00098  | 9.284603 |
| P01008 | 0 | 0.9592 | 1069.06  | 2137.113 | 2.06  | 0.00221  | 0        |
| P01008 | 0 | 0.7792 | 713.0421 | 2137.112 | 1.26  | 0.0009   | 4.931117 |
| P01008 | 0 | 0.8514 | 860.0015 | 1718.996 | 1.57  | 0.00135  | 6.480305 |
| P01008 | 0 | 0.8077 | 573.6694 | 1718.994 | 0.28  | 0.00016  | 8.617599 |
| P01008 | 0 | 0.95   | 701.0816 | 2101.23  | 0     | 0        | 8.351913 |
| P01008 | 0 | 0.9839 | 526.064  | 2101.234 | 1.91  | 0.001    | 6.438447 |
| P01008 | 0 | 1      | 701.0826 | 2101.233 | 1.48  | 0.00104  | 10.83515 |
| P01008 | 0 | 1      | 526.0634 | 2101.232 | 0.75  | 0.00039  | 18.27925 |
| P01008 | 0 | 0.7586 | 799.4103 | 1597.813 | 2.03  | 0.00162  | 10.38351 |
| P01008 | 0 | 1      | 533.276  | 1597.813 | 2.14  | 0.00114  | 9.060894 |
| P01008 | 0 | 1      | 533.2753 | 1597.811 | 0.76  | 0.00041  | 10.33013 |
| P01008 | 0 | 0.2037 | 685.6293 | 2054.873 | 1.32  | 0.0009   | 2.700342 |
| P01008 | 2 | 1      | 763.45   | 3813.221 | 4.22  | 0.00322  | 16.86756 |
| P01008 | 0 | 0.194  | 685.6296 | 2054.874 | 1.76  | 0.00121  | 6.667533 |
| P01008 | 0 | 1      | 691.3392 | 1381.671 | 1.85  | 0.00128  | 12.77742 |
| P01008 | 1 | 1      | 915.0343 | 3657.115 | 3.26  | 0.00298  | 18.34693 |
| P01008 | 0 | 1      | 691.3398 | 1381.672 | 2.73  | 0.00189  | 0        |
| P01008 | 0 | 1      | 767.4344 | 1533.862 | 2.32  | 0.00178  | 3.862999 |
| P01008 | 0 | 1      | 767.4338 | 1533.86  | 1.52  | 0.00117  | 7.468942 |
| P01008 | 0 | 1      | 680.298  | 2038.879 | 1.74  | 0.00118  | 39.52968 |
| P01008 | 0 | 1      | 533.2748 | 1597.81  | -0.15 | -0.00008 | 70.36616 |
| P01008 | 1 | 0.9744 | 551.96   | 1653.866 | -0.02 | -0.00001 | 18.82848 |
| P01008 | 0 | 1      | 459.6142 | 1376.828 | -0.12 | -0.00006 | 15.79805 |
| P01008 | 0 | 0.9802 | 812.4237 | 2435.256 | 1.21  | 0.00098  | 0        |
| P01008 | 0 | 1      | 691.3391 | 1381.671 | 1.76  | 0.00122  | 5.048982 |
| P01008 | 1 | 1      | 551.9601 | 1653.866 | 0.09  | 0.00005  | 30.0529  |
| P01008 | 1 | 1      | 721.6984 | 2163.081 | 1.74  | 0.00126  | 6.939695 |
| P01008 | 1 |        | 424.2588 | 1270.762 | 1.4   | 0.00059  | 15.20503 |
| P01008 | 0 | 0.9756 | 461.2286 | 1381.671 | 1.86  | 0.00086  | 4.196344 |
| P01008 | 0 | 0.6667 | 598.8439 | 1196.68  | 3.32  | 0.00198  | 5.639536 |
| P01008 | 0 | 1      | 685.6298 | 2054.875 | 2.03  | 0.00139  | 29.25652 |
| P01008 | 0 | 1      | 685.6298 | 2054.875 | 2.03  | 0.00139  | 29.25652 |
| P01008 | 0 | 0.8444 | 495.5936 | 1484.766 | 0.61  | 0.0003   | 60.71108 |
| P01008 | 0 | 1      | 691.3371 | 1381.667 | -1.16 | -0.0008  | 0        |

|        |   |        |          |          |       |          |          |
|--------|---|--------|----------|----------|-------|----------|----------|
| P01008 | 0 | 1      | 701.0823 | 2101.232 | 0.96  | 0.00067  | 36.74249 |
| P01008 | 0 | 1      | 461.2286 | 1381.671 | 1.99  | 0.00092  | 37.48006 |
| P01008 | 0 | 0.9091 | 495.5942 | 1484.768 | 1.66  | 0.00082  | 0        |
| P01008 | 0 | 1      | 543.6285 | 1628.871 | 2.08  | 0.00113  | 42.52659 |
| P01008 | 0 | 0.6667 | 454.9929 | 1816.95  | 1.33  | 0.0006   | 4.059965 |
| P01008 | 0 | 0.9787 | 691.3397 | 1381.672 | 2.56  | 0.00177  | 4.04736  |
| P01008 | 0 | 0.7391 | 407.9727 | 1628.869 | 0.95  | 0.00039  | 0        |
| P01008 | 0 | 0.6905 | 598.8402 | 1196.673 | -2.81 | -0.00168 | 14.13431 |
| P01008 | 0 | 0.6957 | 407.9727 | 1628.869 | 0.88  | 0.00036  | 0        |
| P01008 | 1 | 1      | 472.2941 | 1414.868 | 4.05  | 0.00191  | 48.20914 |
| P01008 | 0 | 0.3571 | 787.9496 | 1574.892 | 0.55  | 0.00044  | 11.68216 |
| P01008 | 1 |        | 402.5805 | 1205.727 | 2.01  | 0.00081  | 13.49336 |
| P01008 | 0 | 0.975  | 543.6279 | 1628.869 | 1.07  | 0.00058  | 24.526   |
| P01008 | 0 | 0.7719 | 526.7916 | 1052.576 | 1.46  | 0.00077  | 2.342458 |
| P01008 | 0 | 0.6842 | 564.3146 | 1127.622 | 2.97  | 0.00167  | 18.88368 |
| P01008 | 0 | 1      | 543.6292 | 1628.873 | 3.43  | 0.00186  | 21.51781 |
| P01008 | 0 | 0.8148 | 528.3214 | 1055.635 | 2.34  | 0.00123  | 3.301655 |
| P01008 | 0 | 0.7857 | 713.0436 | 2137.116 | 3.49  | 0.00248  | 23.45052 |
| P01008 | 0 | 0.5    | 606.3241 | 1816.958 | 5.8   | 0.00351  | 15.05096 |
| P01008 | 0 | 0.8846 | 573.6714 | 1719     | 3.8   | 0.00217  | 3.99653  |
| P01008 | 2 | 0.875  | 409.2416 | 1633.944 | 4.19  | 0.00171  | 21.16237 |
| P01008 | 0 | 0.6735 | 564.3146 | 1127.622 | 2.86  | 0.00161  | 6.180216 |
| P01008 | 1 | 0.7879 | 551.9616 | 1653.87  | 2.86  | 0.00158  | 12.15017 |
| P01008 | 1 | 1      | 586.2687 | 2342.053 | 3.21  | 0.00188  | 0        |
| P01008 | 0 | 0.7931 | 606.3229 | 1816.954 | 3.89  | 0.00235  | 6.560986 |
| P01008 | 0 | 1      | 685.632  | 2054.881 | 5.15  | 0.00353  | 0        |
| P01008 | 0 | 1      | 685.632  | 2054.881 | 5.15  | 0.00353  | 0        |
| P01008 | 1 | 0.8333 | 625.7039 | 1875.097 | 1.51  | 0.00094  | 0        |
| P01008 | 0 | 0.25   | 718.3731 | 2153.105 | 0.35  | 0.00025  | 0        |
| P01008 | 0 | 1      | 695.3832 | 1389.759 | 2.39  | 0.00166  | 36.70161 |
| P01008 | 1 | 0.7895 | 417.2541 | 1249.748 | 0.93  | 0.00039  | 6.831983 |
| P01008 | 0 | 0.85   | 533.2758 | 1597.813 | 1.68  | 0.00089  | 5.076517 |
| P01008 | 0 | 0.88   | 454.9936 | 1816.952 | 2.87  | 0.0013   | 41.03553 |
| P01008 | 0 | 0.5172 | 376.5447 | 1127.619 | 0.74  | 0.00028  | 15.15065 |
| P01008 | 0 | 1      | 691.3394 | 1381.671 | 2.11  | 0.00146  | 3.125758 |
| P01008 | 0 | 0.6667 | 461.2298 | 1381.675 | 4.51  | 0.00208  | 25.69714 |
| P01008 | 0 | 1      | 680.2991 | 2038.883 | 3.45  | 0.00234  | 43.75751 |
| P01008 | 0 | 0.4375 | 718.374  | 2153.107 | 1.63  | 0.00117  | 12.90257 |
| P01008 | 0 | 0.84   | 777.3729 | 1553.738 | -0.67 | -0.00052 | 12.10988 |
| P01008 | 0 | 0.6364 | 564.3145 | 1127.622 | 2.64  | 0.00149  | 15.29742 |
| P01008 | 0 | 0.8462 | 574.8502 | 1148.693 | 1.12  | 0.00064  | 11.74024 |
| P01008 | 1 | 0      | 402.5804 | 1205.727 | 1.78  | 0.00071  | 23.94239 |
| P01008 | 1 | 0.7353 | 625.3781 | 1249.749 | 1.84  | 0.00115  | 2.335834 |
| P01008 | 0 | 0.625  | 407.9733 | 1628.871 | 2.3   | 0.00094  | 0        |
| P01008 | 0 | 0.8125 | 533.2741 | 1597.808 | -1.41 | -0.00075 | 12.47126 |
| P01008 | 1 |        | 402.5798 | 1205.725 | 0.26  | 0.0001   | 0        |
| P01008 | 0 | 0.8065 | 688.9188 | 1376.83  | 1.5   | 0.00103  | 15.91041 |
| P01008 | 0 | 0.9    | 574.8508 | 1148.694 | 2.29  | 0.00131  | 29.4141  |
| P01008 | 0 | 0.7143 | 407.9739 | 1628.874 | 3.87  | 0.00158  | 0        |
| P01008 | 0 | 1      | 518.5856 | 1553.742 | 1.84  | 0.00095  | 21.30715 |
| P01008 | 0 | 0.9048 | 383.5687 | 1148.692 | -0.12 | -0.00004 | 7.819993 |
| P01008 | 1 | 1      | 781.3564 | 2342.055 | 3.95  | 0.00308  | 8.452435 |



|        |   |        |          |          |       |          |          |
|--------|---|--------|----------|----------|-------|----------|----------|
| P13671 | 0 | 0.9516 | 638.3417 | 1275.676 | 2.86  | 0.00182  | 16.10202 |
| P13671 | 0 | 0.973  | 826.1    | 2476.285 | 1.79  | 0.00148  | 3.049857 |
| P13671 | 0 | 0.9746 | 826.1001 | 2476.286 | 1.94  | 0.0016   | 4.455562 |
| P13671 | 0 | 0.989  | 826.1001 | 2476.286 | 1.94  | 0.0016   | 7.03271  |
| P13671 | 0 | 0.9714 | 611.0492 | 2441.175 | 2.73  | 0.00166  | 30.82302 |
| P13671 | 0 | 1      | 669.0273 | 2005.067 | 2.47  | 0.00165  | 19.04386 |
| P13671 | 0 | 0.8286 | 570.6334 | 1709.886 | 4.55  | 0.00259  | 14.27956 |
| P13671 | 0 | 1      | 669.0269 | 2005.066 | 1.83  | 0.00123  | 1.57153  |
| P13671 | 0 | 1      | 669.0266 | 2005.065 | 1.47  | 0.00098  | 0        |
| P13671 | 0 | 0.8333 | 570.6318 | 1709.881 | 1.77  | 0.00101  | 3.807343 |
| P13671 | 0 | 0.7451 | 505.2769 | 1513.816 | 1.29  | 0.00065  | 10.28144 |
| P13671 | 0 | 0.9048 | 757.4119 | 1513.817 | 1.66  | 0.00126  | 100      |
| P13671 | 0 | 1      | 718.7366 | 2154.195 | 1.15  | 0.00083  | 2.044003 |
| P13671 | 0 | 1      | 1077.602 | 2154.196 | 1.58  | 0.00171  | 0        |
| P13671 | 0 | 1      | 981.1137 | 2941.326 | 1.12  | 0.0011   | 5.687417 |
| P13671 | 1 | 0.95   | 426.9815 | 1704.904 | 1.37  | 0.00059  | 27.22173 |
| P13671 | 0 | 0.6863 | 591.3431 | 1181.679 | 1.83  | 0.00108  | 15.73541 |
| P13671 | 0 | 0.8462 | 390.8998 | 1170.685 | 1.33  | 0.00052  | 36.13808 |
| P13671 | 1 | 0.9259 | 426.9824 | 1704.908 | 3.31  | 0.00141  | 24.37625 |
| P13671 | 1 | 1      | 568.9727 | 1704.903 | 0.84  | 0.00048  | 0        |
| P13671 | 0 | 1      | 686.318  | 2056.939 | 2.32  | 0.00159  | 32.20995 |
| P13671 | 0 | 0.8367 | 512.2855 | 1534.842 | 1.92  | 0.00098  | 6.602458 |
| P13671 | 0 | 0.8529 | 390.8997 | 1170.685 | 1.1   | 0.00043  | 42.50411 |
| P13671 | 0 | 0.9423 | 585.848  | 1170.689 | 4.55  | 0.00266  | 0        |
| P13671 | 0 | 0.9778 | 892.96   | 1784.913 | 2.06  | 0.00184  | 6.604506 |
| P13671 | 0 | 0.939  | 595.6427 | 1784.914 | 2.49  | 0.00148  | 7.826789 |
| P13671 | 0 | 0.7234 | 547.8019 | 1094.597 | 3.14  | 0.00172  | 7.152237 |
| P13671 | 0 | 1      | 516.9406 | 1548.807 | 4.14  | 0.00214  | 53.79244 |
| P13671 | 1 | 0.8889 | 375.9785 | 1500.892 | -0.66 | -0.00025 | 34.51408 |
| P13671 | 1 | 1      | 375.9805 | 1500.9   | 4.63  | 0.00174  | 17.11764 |
| P13671 | 0 | 1      | 390.9005 | 1170.687 | 3.06  | 0.00119  | 70.66444 |
| P13671 | 0 | 0.85   | 669.0267 | 2005.066 | 1.65  | 0.0011   | 33.55584 |
| P13671 | 1 | 0.9655 | 495.6384 | 1484.901 | 1.57  | 0.00078  | 0        |
| P13671 | 0 | 0.6744 | 576.7957 | 1152.584 | 2.84  | 0.00163  | 14.9211  |
| P13671 | 1 | 1      | 758.3466 | 2273.025 | 1.69  | 0.00128  | 18.26722 |
| P13671 | 0 | 1      | 814.3945 | 2441.169 | 0.31  | 0.00025  | 0        |
| P13671 | 0 | 0.7297 | 710.3926 | 1419.778 | 2.39  | 0.0017   | 0        |
| P13671 | 0 | 1      | 667.6138 | 2000.827 | 1.16  | 0.00077  | 10.16739 |
| P13671 | 0 | 0.7812 | 473.9306 | 1419.777 | 1.93  | 0.00091  | 22.29041 |
| P13671 | 0 | 0.9024 | 517.2996 | 1033.592 | 0.73  | 0.00038  | 11.05105 |
| P13671 | 0 | 0.6585 | 576.7957 | 1152.584 | 2.84  | 0.00163  | 5.53384  |
| P13671 | 1 | 1      | 534.3165 | 1600.935 | 2.06  | 0.0011   | 19.86281 |
| P13671 | 0 | 0.6    | 410.2375 | 1228.698 | 1.4   | 0.00057  | 15.49434 |
| P13671 | 0 | 0.5714 | 620.9923 | 1860.962 | 1.03  | 0.00064  | 0        |
| P13671 | 0 | 0.1667 | 492.2888 | 1474.852 | 0.7   | 0.00034  | 24.1463  |
| P13671 | 0 | 1      | 523.794  | 1046.581 | 2.04  | 0.00107  | 41.30789 |
| P13671 | 1 | 0.7429 | 742.9531 | 1484.899 | 0.45  | 0.00034  | 0        |
| P13671 | 0 | 0.84   | 504.937  | 1512.796 | 1.87  | 0.00094  | 7.761663 |
| P13671 | 1 | 1      | 400.9893 | 1600.935 | 2.25  | 0.0009   | 11.38574 |
| P13671 | 0 | 0.7241 | 394.5646 | 1181.679 | 1.98  | 0.00078  | 30.83162 |
| P13671 | 0 | 0.8846 | 512.2856 | 1534.842 | 2.27  | 0.00116  | 17.65926 |
| P13671 | 0 | 1      | 397.5658 | 1190.683 | 1.93  | 0.00076  | 5.471869 |

|        |   |        |          |          |       |          |          |
|--------|---|--------|----------|----------|-------|----------|----------|
| P13671 | 0 | 0.5714 | 405.8893 | 1215.653 | 2.26  | 0.00092  | 29.38384 |
| P13671 | 0 | 0.25   | 505.277  | 1513.817 | 1.66  | 0.00084  | 0        |
| P13671 | 0 | 0.625  | 405.889  | 1215.652 | 1.51  | 0.00061  | 51.00243 |
| P13671 | 0 | 0.963  | 608.3303 | 1215.653 | 2.25  | 0.00137  | 28.56708 |
| P13671 | 0 | 0.56   | 757.4141 | 1513.821 | 4.57  | 0.00346  | 5.035923 |
| P13671 | 0 | 0.5    | 504.9363 | 1512.794 | 0.36  | 0.00018  | 20.19027 |
| P13671 | 0 | 0.7826 | 517.2994 | 1033.592 | 0.49  | 0.00026  | 44.12528 |
| P43652 | 0 | 0.8    | 442.2485 | 1324.731 | 1.82  | 0.0008   | 30.10625 |
| P43652 | 0 | 0.9254 | 638.8432 | 1276.679 | 3.69  | 0.00236  | 5.401321 |
| P43652 | 0 | 1      | 486.9039 | 1458.697 | 1.42  | 0.00069  | 37.00771 |
| P43652 | 0 | 1      | 1054.153 | 3160.445 | 2.96  | 0.00312  | 8.888538 |
| P43652 | 0 | 1      | 671.9017 | 1342.796 | 2.09  | 0.0014   | 8.7066   |
| P43652 | 0 | 0.9444 | 638.8427 | 1276.678 | 2.93  | 0.00187  | 6.047142 |
| P43652 | 1 | 1      | 530.6473 | 1589.927 | 1.94  | 0.00103  | 5.831529 |
| P43652 | 0 | 1      | 1054.153 | 3160.444 | 2.84  | 0.00299  | 8.709172 |
| P43652 | 0 | 1      | 790.866  | 3160.442 | 2.2   | 0.00174  | 3.166996 |
| P43652 | 0 | 0.7647 | 442.2485 | 1324.731 | 1.82  | 0.0008   | 8.517861 |
| P43652 | 0 | 0.7812 | 442.2484 | 1324.731 | 1.68  | 0.00074  | 10.9256  |
| P43652 | 0 | 1      | 865.1037 | 2593.297 | 2.44  | 0.00211  | 0        |
| P43652 | 0 | 1      | 1016.526 | 2032.044 | 2.31  | 0.00235  | 1.8546   |
| P43652 | 0 | 0.8605 | 544.7912 | 2176.143 | 0.63  | 0.00034  | 4.044751 |
| P43652 | 0 | 1      | 486.903  | 1458.694 | -0.33 | -0.00016 | 8.392772 |
| P43652 | 0 | 0.7222 | 478.6136 | 1433.826 | 2.04  | 0.00098  | 14.4332  |
| P43652 | 1 | 0.8333 | 398.2375 | 1589.928 | 2.43  | 0.00096  | 7.338655 |
| P43652 | 1 | 1      | 530.6474 | 1589.928 | 2.05  | 0.00109  | 4.593416 |
| P43652 | 1 | 0.9412 | 398.2369 | 1589.926 | 0.81  | 0.00032  | 0        |
| P43652 | 1 | 1      | 530.6473 | 1589.927 | 1.94  | 0.00103  | 0        |
| P43652 | 1 | 0.9701 | 530.6473 | 1589.927 | 1.94  | 0.00103  | 4.436812 |
| P43652 | 0 | 0.6875 | 440.9434 | 1320.816 | 2.1   | 0.00092  | 8.158227 |
| P43652 | 0 | 0.7727 | 660.9116 | 1320.816 | 2.3   | 0.00152  | 6.18975  |
| P43652 | 0 | 1      | 1088.577 | 2176.146 | 2.04  | 0.00222  | 0        |
| P43652 | 1 | 0.9615 | 398.2376 | 1589.928 | 2.58  | 0.00103  | 4.560969 |
| P43652 | 1 | 1      | 530.6474 | 1589.928 | 2.05  | 0.00109  | 4.689648 |
| P43652 | 1 | 0.84   | 398.2377 | 1589.929 | 2.89  | 0.00115  | 4.004899 |
| P43652 | 1 | 1      | 530.6473 | 1589.927 | 1.82  | 0.00096  | 4.000896 |
| P43652 | 1 | 1      | 482.6125 | 1445.823 | 0.34  | 0.00017  | 2.008573 |
| P43652 | 0 | 1      | 913.1375 | 2737.398 | 2.08  | 0.0019   | 3.910165 |
| P43652 | 0 | 1      | 685.1052 | 2737.399 | 2.48  | 0.0017   | 5.704614 |
| P43652 | 0 | 0.9048 | 478.9289 | 1434.772 | 2.32  | 0.00111  | 11.15421 |
| P43652 | 0 | 1      | 1129.181 | 3385.529 | 1.08  | 0.00122  | 0        |
| P43652 | 0 | 1      | 883.1658 | 3529.641 | 3.95  | 0.00349  | 9.399137 |
| P43652 | 1 | 0.8182 | 612.8416 | 2448.344 | 2.35  | 0.00144  | 6.264833 |
| P43652 | 1 | 0.8704 | 816.7854 | 2448.342 | 1.24  | 0.00101  | 6.135121 |
| P43652 | 1 | 1      | 745.4    | 2978.578 | 2.34  | 0.00174  | 8.194013 |
| P43652 | 1 | 1      | 745.4    | 2978.578 | 2.34  | 0.00174  | 8.194013 |
| P43652 | 0 | 0.95   | 668.0504 | 2002.137 | 2.74  | 0.00183  | 0        |
| P43652 | 0 | 0.7797 | 668.0509 | 2002.138 | 3.56  | 0.00237  | 23.41767 |
| P43652 | 0 | 0.7708 | 1001.572 | 2002.137 | 2.74  | 0.00274  | 7.144054 |
| P43652 | 0 | 1      | 668.0494 | 2002.134 | 1.36  | 0.00091  | 7.795515 |
| P43652 | 1 | 0.9855 | 781.4256 | 3122.681 | 2.3   | 0.0018   | 4.736406 |
| P43652 | 1 | 1      | 1041.572 | 3122.701 | 8.89  | 0.00926  | 0        |
| P43652 | 0 | 1      | 707.8594 | 1414.711 | 1.57  | 0.00111  | 24.50251 |

|        |   |        |          |          |       |          |          |
|--------|---|--------|----------|----------|-------|----------|----------|
| P43652 | 0 | 0.9241 | 707.8599 | 1414.712 | 2.26  | 0.0016   | 6.334191 |
| P43652 | 0 | 1      | 764.8453 | 1528.683 | 0.94  | 0.00072  | 3.37145  |
| P43652 | 0 | 1      | 510.233  | 1528.684 | 1.71  | 0.00087  | 7.725793 |
| P43652 | 0 | 1      | 486.9037 | 1458.696 | 0.98  | 0.00048  | 5.635805 |
| P43652 | 0 | 1      | 486.9036 | 1458.696 | 0.92  | 0.00045  | 27.7282  |
| P43652 | 0 | 1      | 534.9382 | 1602.8   | 1.82  | 0.00097  | 8.778147 |
| P43652 | 0 | 1      | 534.9387 | 1602.802 | 2.85  | 0.00152  | 8.367504 |
| P43652 | 0 | 0.8222 | 607.0431 | 1819.115 | 3.48  | 0.00211  | 17.13243 |
| P43652 | 0 | 0.9091 | 867.9698 | 1734.932 | 1.6   | 0.00138  | 9.411367 |
| P43652 | 0 | 1      | 637.6407 | 1910.908 | 1.62  | 0.00103  | 15.03099 |
| P43652 | 0 | 1      | 578.9822 | 1734.932 | 1.41  | 0.00082  | 4.940291 |
| P43652 | 0 | 1      | 955.9577 | 1910.908 | 1.95  | 0.00186  | 8.962317 |
| P43652 | 0 | 0.9623 | 578.983  | 1734.935 | 2.89  | 0.00167  | 3.139548 |
| P43652 | 0 | 0.9873 | 692.7949 | 1384.582 | 1.93  | 0.00134  | 14.58209 |
| P43652 | 0 | 0.9455 | 692.7944 | 1384.581 | 1.23  | 0.00085  | 0        |
| P43652 | 0 | 0.9057 | 640.3427 | 1279.678 | 2.58  | 0.00165  | 16.52666 |
| P43652 | 0 | 1      | 661.3623 | 1321.717 | 2.8   | 0.00185  | 13.67644 |
| P43652 | 0 | 0.8793 | 692.7947 | 1384.582 | 1.67  | 0.00115  | 3.215612 |
| P43652 | 1 | 0.75   | 530.6485 | 1589.931 | 4.12  | 0.00219  | 46.61637 |
| P43652 | 0 | 1      | 534.9378 | 1602.799 | 1.14  | 0.00061  | 0        |
| P43652 | 0 | 1      | 486.9038 | 1458.697 | 1.23  | 0.0006   | 55.34235 |
| P43652 | 0 | 0.9412 | 478.9287 | 1434.772 | 2.01  | 0.00096  | 27.00776 |
| P43652 | 0 | 1      | 534.9371 | 1602.797 | -0.12 | -0.00006 | 9.675637 |
| P43652 | 1 | 0.3125 | 479.2641 | 1435.778 | 1.33  | 0.00064  | 14.21353 |
| P43652 | 0 | 0.5893 | 526.795  | 1052.583 | 0.09  | 0.00004  | 0        |
| P43652 | 0 | 1      | 640.3427 | 1279.678 | 2.58  | 0.00165  | 24.31348 |
| P43652 | 0 | 0.7    | 395.9058 | 1185.703 | 1.1   | 0.00044  | 20.36769 |
| P43652 | 0 | 0.8163 | 560.8719 | 1120.737 | 2.92  | 0.00164  | 38.18472 |
| P43652 | 0 | 1      | 426.2298 | 1276.675 | 0.34  | 0.00014  | 13.81138 |
| P43652 | 0 | 0.7541 | 560.8721 | 1120.737 | 3.35  | 0.00188  | 6.374237 |
| P43652 | 0 | 1      | 431.5622 | 1292.672 | 2.17  | 0.00093  | 14.10278 |
| P43652 | 0 | 0.9444 | 442.2493 | 1324.733 | 3.61  | 0.0016   | 23.24922 |
| P43652 | 0 | 0.963  | 559.8088 | 1118.61  | 1.66  | 0.00093  | 5.597795 |
| P43652 | 0 | 0.8519 | 441.2442 | 1321.718 | 3.28  | 0.00144  | 15.65447 |
| P43652 | 0 | 0.6333 | 426.2297 | 1276.675 | 0.12  | 0.00005  | 17.67797 |
| P43652 | 1 | 0.9706 | 482.6133 | 1445.825 | 2.05  | 0.00099  | 43.69828 |
| P43652 | 0 | 0.8947 | 707.8584 | 1414.71  | 0.19  | 0.00013  | 0        |
| P43652 | 0 | 1      | 566.3311 | 1131.655 | 3.24  | 0.00183  | 5.560405 |
| P43652 | 0 | 1      | 377.8893 | 1131.653 | 1.85  | 0.0007   | 3.336759 |
| P43652 | 0 | 0.75   | 395.9059 | 1185.703 | 1.33  | 0.00053  | 29.40627 |
| P43652 | 0 | 0.1739 | 395.9059 | 1185.703 | 1.18  | 0.00047  | 34.90573 |
| P43652 | 0 | 0.6333 | 426.2311 | 1276.679 | 3.49  | 0.00149  | 4.011516 |
| P43652 | 0 | 0.439  | 526.7961 | 1052.585 | 2.29  | 0.0012   | 0        |
| P43652 | 0 | 0.7907 | 448.2709 | 1342.798 | 3.58  | 0.0016   | 4.487895 |
| P43652 | 0 | 0.6111 | 660.9116 | 1320.816 | 2.3   | 0.00152  | 14.65388 |
| P43652 | 0 | 0.9355 | 448.2701 | 1342.796 | 1.94  | 0.00087  | 0        |
| P43652 | 0 | 0.8947 | 646.8407 | 1292.674 | 3.71  | 0.0024   | 7.852165 |
| P43652 | 0 | 0.9524 | 635.8088 | 1270.61  | 2.43  | 0.00154  | 43.07589 |
| P43652 | 0 | 0.5854 | 593.356  | 1185.705 | 2.66  | 0.00157  | 0        |
| P43652 | 0 | 1      | 377.8898 | 1131.655 | 3.07  | 0.00116  | 26.66956 |
| P43652 | 0 | 0.6111 | 534.9388 | 1602.802 | 3.08  | 0.00164  | 26.06594 |
| P43652 | 0 | 1      | 377.8894 | 1131.654 | 2.1   | 0.00079  | 21.89651 |

|        |   |        |          |          |       |          |          |
|--------|---|--------|----------|----------|-------|----------|----------|
| P43652 | 0 | 0.9211 | 472.2422 | 1414.712 | 1.95  | 0.00092  | 8.636809 |
| P43652 | 0 | 1      | 605.8128 | 1210.618 | 1.74  | 0.00105  | 11.60806 |
| P43652 | 0 | 1      | 566.331  | 1131.655 | 3.02  | 0.00171  | 16.48912 |
| P43652 | 0 | 1      | 478.614  | 1433.827 | 2.94  | 0.0014   | 32.40703 |
| P43652 | 0 | 1      | 1006.116 | 3016.334 | 0.15  | 0.00015  | 0        |
| P43652 | 0 | 0.9787 | 494.2794 | 987.5514 | 2.24  | 0.00111  | 0        |
| P43652 | 0 | 0.88   | 637.6412 | 1910.909 | 2.39  | 0.00152  | 11.10922 |
| P43652 | 0 | 0.6    | 442.2481 | 1324.73  | 0.78  | 0.00034  | 6.327705 |
| P43652 | 0 | 0.4615 | 526.7959 | 1052.585 | 1.82  | 0.00096  | 7.326452 |
| P43652 | 0 | 1      | 378.1959 | 1132.573 | 0.61  | 0.00023  | 35.69987 |
| P43652 | 0 | 0.4359 | 526.7966 | 1052.586 | 3.22  | 0.00169  | 0        |
| P43652 | 0 | 0.9375 | 589.3093 | 1177.611 | -0.16 | -0.0001  | 0        |
| P43652 | 0 | 0.5263 | 440.9429 | 1320.814 | 0.99  | 0.00044  | 39.05444 |
| P43652 | 0 | 0.8409 | 561.8089 | 1122.611 | 3.4   | 0.00191  | 10.14421 |
| P43652 | 0 | 1      | 431.5616 | 1292.67  | 0.61  | 0.00026  | 28.0056  |
| P43652 | 0 | 0.4483 | 526.7957 | 1052.584 | 1.48  | 0.00078  | 42.59482 |
| P43652 | 0 | 1      | 494.279  | 987.5507 | 1.44  | 0.00071  | 6.296525 |
| P43652 | 0 | 0.9189 | 635.8091 | 1270.611 | 3     | 0.00191  | 0        |
| P43652 | 0 | 1      | 486.9034 | 1458.696 | 0.42  | 0.0002   | 79.00513 |
| P43652 | 0 | 1      | 427.2311 | 1279.679 | 3.09  | 0.00132  | 27.60504 |
| P43652 | 0 | 0.8718 | 561.8086 | 1122.61  | 2.85  | 0.0016   | 25.70295 |
| P43652 | 0 | 1      | 431.562  | 1292.671 | 1.6   | 0.00069  | 74.15913 |
| P43652 | 0 | 0.8462 | 427.2297 | 1279.675 | -0.06 | -0.00002 | 0        |
| P43652 | 0 | 1      | 404.2108 | 1210.618 | 1.3   | 0.00053  | 17.00945 |
| P43652 | 0 | 0.9375 | 637.6412 | 1910.909 | 2.49  | 0.00158  | 0        |
| P43652 | 1 | 1      | 530.6478 | 1589.929 | 2.86  | 0.00151  | 45.22499 |
| P43652 | 0 | 0.2941 | 377.8898 | 1131.655 | 3.07  | 0.00116  | 36.78856 |
| P43652 | 0 | 1      | 494.2795 | 987.5516 | 2.43  | 0.0012   | 6.577944 |
| P43652 | 0 | 0.4737 | 472.2421 | 1414.712 | 1.69  | 0.0008   | 48.90598 |
| P43652 | 1 | 1      | 482.6135 | 1445.826 | 2.43  | 0.00117  | 37.36449 |
| P43652 | 1 | 0.7143 | 479.2654 | 1435.782 | 4.01  | 0.00192  | 38.4207  |
| P43652 | 1 | 0.9429 | 795.4673 | 1589.927 | 1.83  | 0.00145  | 0        |
| P01042 | 0 | 0.9149 | 770.4023 | 1539.797 | 2.66  | 0.00205  | 6.681793 |
| P01042 | 0 | 0.7846 | 513.9367 | 1539.796 | 1.46  | 0.00075  | 7.929009 |
| P01042 | 0 | 1      | 770.4014 | 1539.795 | 1.39  | 0.00107  | 5.82401  |
| P01042 | 0 | 0.9863 | 698.3505 | 1395.694 | 1.72  | 0.0012   | 5.75931  |
| P01042 | 0 | 0.9853 | 698.3506 | 1395.694 | 1.89  | 0.00132  | 18.80093 |
| P01042 | 0 | 0.766  | 402.2293 | 1204.673 | 2.04  | 0.00082  | 22.50484 |
| P01042 | 0 | 0.6316 | 488.3074 | 975.6075 | -0.17 | -0.00008 | 27.3522  |
| P01042 | 1 | 1      | 764.3976 | 2291.178 | 0.48  | 0.00037  | 13.80616 |
| P01042 | 0 | 0.7442 | 402.2293 | 1204.673 | 2.19  | 0.00088  | 4.146805 |
| P01042 | 0 | 0.7818 | 402.2287 | 1204.672 | 0.67  | 0.00027  | 5.28186  |
| P01042 | 0 | 1      | 764.3867 | 1527.766 | 1.82  | 0.00139  | 2.835009 |
| P01042 | 0 | 0.9583 | 764.3848 | 1527.762 | -0.73 | -0.00056 | 0        |
| P01042 | 1 | 1      | 487.2952 | 1459.871 | 7.2   | 0.00351  | 23.69765 |
| P01042 | 0 | 1      | 1009.996 | 2018.985 | 2.22  | 0.00224  | 3.021011 |
| P01042 | 0 | 1      | 809.7669 | 2427.286 | 0.12  | 0.0001   | 4.31959  |
| P01042 | 0 | 1      | 607.5783 | 2427.291 | 2.25  | 0.00137  | 4.088181 |
| P01042 | 0 | 0.9692 | 809.7702 | 2427.296 | 4.27  | 0.00345  | 10.51965 |
| P01042 | 0 | 1      | 607.5779 | 2427.29  | 1.65  | 0.001    | 4.421775 |
| P01042 | 0 | 0.8387 | 809.7686 | 2427.291 | 2.31  | 0.00187  | 23.68766 |
| P01042 | 0 | 0.978  | 809.7675 | 2427.288 | 0.95  | 0.00077  | 4.202127 |

|        |   |        |          |          |       |          |          |
|--------|---|--------|----------|----------|-------|----------|----------|
| P01042 | 0 | 0.9074 | 607.5794 | 2427.296 | 4.16  | 0.00253  | 0        |
| P01042 | 0 | 1      | 761.734  | 2283.187 | 1.68  | 0.00128  | 2.382827 |
| P01042 | 1 | 1      | 482.9506 | 1446.837 | 1.78  | 0.00086  | 10.22811 |
| P01042 | 1 | 1      | 482.9506 | 1446.837 | 1.78  | 0.00086  | 8.97442  |
| P01042 | 1 | 1      | 764.3993 | 2291.183 | 2.72  | 0.00208  | 0        |
| P01042 | 1 | 1      | 764.3971 | 2291.177 | -0.16 | -0.00012 | 7.040606 |
| P01042 | 0 | 1      | 673.6658 | 2018.983 | 1.43  | 0.00096  | 2.435777 |
| P01042 | 0 | 1      | 673.6661 | 2018.984 | 1.79  | 0.0012   | 4.742405 |
| P01042 | 0 | 0.6111 | 488.3085 | 975.6097 | 2.02  | 0.00099  | 5.461788 |
| P01042 | 0 | 0.5789 | 494.8246 | 988.642  | 2.66  | 0.00131  | 50.31135 |
| P01042 | 0 | 1      | 383.229  | 1147.673 | 1.87  | 0.00072  | 0        |
| P01042 | 0 | 0.8971 | 383.229  | 1147.672 | 1.71  | 0.00065  | 2.838167 |
| P01042 | 0 | 0.78   | 402.2294 | 1204.674 | 2.42  | 0.00097  | 14.09317 |
| P01042 | 0 | 0.7818 | 402.2288 | 1204.672 | 0.97  | 0.00039  | 5.102438 |
| P01042 | 0 | 0.8125 | 402.2298 | 1204.675 | 3.33  | 0.00134  | 3.405872 |
| P01042 | 0 | 0.7963 | 402.2291 | 1204.673 | 1.73  | 0.0007   | 8.370627 |
| P01042 | 0 | 0.8889 | 472.7434 | 1887.952 | 0.33  | 0.00016  | 5.556575 |
| P01042 | 0 | 1      | 944.4809 | 1887.955 | 1.71  | 0.00161  | 6.019237 |
| P01042 | 0 | 0.8594 | 629.9899 | 1887.955 | 1.99  | 0.00125  | 100      |
| P01042 | 1 | 1      | 537.2917 | 1609.861 | 2.18  | 0.00117  | 21.31787 |
| P01042 | 0 | 1      | 629.9895 | 1887.954 | 1.41  | 0.00089  | 100      |
| P01042 | 0 | 0.7846 | 513.9374 | 1539.798 | 2.77  | 0.00142  | 9.036447 |
| P01042 | 0 | 0.9318 | 770.4013 | 1539.795 | 1.31  | 0.00101  | 6.453742 |
| P01042 | 0 | 0.9577 | 629.9898 | 1887.955 | 1.8   | 0.00113  | 9.478793 |
| P01042 | 0 | 0.9697 | 799.0803 | 2395.226 | 2.35  | 0.00188  | 4.861084 |
| P01042 | 0 | 0.963  | 799.0794 | 2395.224 | 1.28  | 0.00102  | 3.932043 |
| P01042 | 0 | 0.9873 | 799.0799 | 2395.225 | 1.89  | 0.00151  | 3.761647 |
| P01042 | 0 | 1      | 799.0787 | 2395.222 | 0.44  | 0.00035  | 100      |
| P01042 | 0 | 1      | 1225.861 | 4900.423 | 3.04  | 0.00373  | 0        |
| P01042 | 1 | 0.9333 | 631.586  | 2523.322 | 2.62  | 0.00165  | 0        |
| P01042 | 1 | 0.9333 | 631.586  | 2523.322 | 2.62  | 0.00165  | 0        |
| P01042 | 1 | 1      | 667.611  | 2667.422 | 1.74  | 0.00116  | 4.754493 |
| P01042 | 1 | 0.9672 | 889.8123 | 2667.422 | 1.72  | 0.00153  | 5.378718 |
| P01042 | 0 | 0.9857 | 836.437  | 1671.867 | 0.78  | 0.00065  | 6.189695 |
| P01042 | 0 | 0.7931 | 557.9601 | 1671.866 | 0.15  | 0.00009  | 8.509763 |
| P01042 | 0 | 1      | 836.4376 | 1671.868 | 1.51  | 0.00126  | 17.89953 |
| P01042 | 1 | 0.96   | 632.1061 | 2525.403 | 0.38  | 0.00024  | 9.84887  |
| P01042 | 1 | 0.8043 | 624.4069 | 1247.807 | 1.48  | 0.00092  | 8.60861  |
| P01042 | 0 | 0.95   | 727.3826 | 1453.758 | 1.36  | 0.00099  | 5.150754 |
| P01042 | 0 | 1      | 485.2575 | 1453.758 | 1.3   | 0.00063  | 53.24663 |
| P01042 | 0 | 1      | 578.2933 | 2310.151 | 2.06  | 0.00119  | 0        |
| P01042 | 0 | 1      | 485.2581 | 1453.76  | 2.69  | 0.0013   | 0        |
| P01042 | 0 | 0.9231 | 485.2576 | 1453.758 | 1.68  | 0.00082  | 11.50979 |
| P01042 | 0 | 0.9432 | 727.3829 | 1453.758 | 1.78  | 0.00129  | 7.38668  |
| P01042 | 0 | 1      | 727.3818 | 1453.756 | 0.35  | 0.00025  | 5.586978 |
| P01042 | 0 | 0.9062 | 485.2566 | 1453.755 | -0.46 | -0.00022 | 8.363006 |
| P01042 | 0 | 1      | 462.8356 | 2310.149 | 1.1   | 0.00051  | 3.127691 |
| P01042 | 0 | 0.7792 | 751.7402 | 2253.206 | 0.62  | 0.00047  | 26.10412 |
| P01042 | 0 | 1      | 485.2579 | 1453.759 | 2.19  | 0.00106  | 39.89224 |
| P01042 | 0 | 0.8684 | 407.2364 | 1219.695 | 1.75  | 0.00071  | 9.865144 |
| P01042 | 0 | 1      | 541.6285 | 1622.871 | 2.91  | 0.00157  | 65.89758 |
| P01042 | 0 | 1      | 922.4299 | 1843.852 | 2.99  | 0.00276  | 11.224   |

|        |   |        |          |          |       |          |          |
|--------|---|--------|----------|----------|-------|----------|----------|
| P01042 | 0 | 0.8551 | 655.332  | 1309.657 | 2.17  | 0.00142  | 7.84863  |
| P01042 | 1 | 1      | 546.6893 | 2729.418 | 2.05  | 0.00112  | 15.58186 |
| P01042 | 1 | 0.8571 | 416.6068 | 1247.806 | 0.93  | 0.00039  | 15.65512 |
| P01042 | 0 | 0.8222 | 574.3392 | 1147.671 | 0.69  | 0.00039  | 3.194234 |
| P01042 | 0 | 0.5789 | 494.824  | 988.6407 | 1.42  | 0.0007   | 28.28269 |
| P01042 | 0 | 0.8333 | 574.3388 | 1147.67  | -0.06 | -0.00003 | 8.693646 |
| P01042 | 0 | 0.8049 | 727.3818 | 1453.756 | 0.26  | 0.00019  | 0        |
| P01042 | 0 | 1      | 709.3376 | 1417.668 | 1.33  | 0.00094  | 6.861341 |
| P01042 | 0 | 0.7321 | 655.3306 | 1309.654 | 0.02  | 0.00001  | 0        |
| P01042 | 0 | 0.8205 | 574.3404 | 1147.674 | 2.71  | 0.00155  | 3.178127 |
| P01042 | 0 | 0.1471 | 751.0474 | 2251.128 | 4     | 0.003    | 8.722005 |
| P01042 | 0 | 0.5789 | 494.824  | 988.6408 | 1.48  | 0.00073  | 13.36663 |
| P01042 | 0 | 0.807  | 494.824  | 988.6407 | 1.36  | 0.00067  | 10.86702 |
| P01042 | 0 | 0.8537 | 407.2368 | 1219.696 | 2.72  | 0.00111  | 9.465793 |
| P01042 | 1 | 0.8333 | 487.2931 | 1459.865 | 2.75  | 0.00134  | 7.314584 |
| P01042 | 0 | 1      | 629.9915 | 1887.96  | 4.51  | 0.00284  | 0        |
| P01042 | 0 | 0.878  | 407.2361 | 1219.694 | 1     | 0.0004   | 9.054293 |
| P01042 | 0 | 0.96   | 502.2886 | 1003.57  | 1.65  | 0.00083  | 15.08672 |
| P01042 | 0 | 1      | 637.2874 | 1273.567 | 2.73  | 0.00174  | 0        |
| P01042 | 0 | 0.8889 | 509.9267 | 1527.766 | 1.41  | 0.00072  | 10.12046 |
| P01042 | 0 | 0.8333 | 574.3391 | 1147.671 | 0.47  | 0.00027  | 6.427654 |
| P01042 | 0 | 1      | 473.2275 | 1417.668 | 1.32  | 0.00062  | 11.46027 |
| P01042 | 0 | 0.5789 | 494.8244 | 988.6415 | 2.16  | 0.00107  | 18.16507 |
| P01042 | 0 | 0.8519 | 407.2372 | 1219.697 | 3.7   | 0.0015   | 72.38647 |
| P01042 | 1 | 0.9231 | 667.6115 | 2667.424 | 2.47  | 0.00165  | 14.86222 |
| P01042 | 0 | 0.8333 | 799.0799 | 2395.225 | 1.89  | 0.00151  | 7.923137 |
| P01042 | 1 | 0.7632 | 630.924  | 1260.841 | 3.39  | 0.00214  | 0        |
| P01042 | 1 | 0.973  | 842.4697 | 2525.395 | -2.83 | -0.00238 | 34.30891 |
| P01042 | 0 | 0.8649 | 509.927  | 1527.766 | 2.01  | 0.00103  | 0        |
| P01042 | 0 | 0.7857 | 530.7886 | 1060.57  | 1.24  | 0.00066  | 0        |
| P01042 | 0 | 0.5102 | 494.8245 | 988.6417 | 2.35  | 0.00116  | 63.07803 |
| P01042 | 0 | 0.8966 | 557.9613 | 1671.869 | 2.34  | 0.00131  | 10.70925 |
| P01042 | 0 | 0.2941 | 513.9371 | 1539.797 | 2.29  | 0.00118  | 15.62038 |
| P01042 | 0 | 0.8214 | 407.2362 | 1219.694 | 1.22  | 0.0005   | 20.23017 |
| P01042 | 0 | 0.875  | 1127.106 | 2253.206 | 0.38  | 0.00043  | 52.58852 |
| P01042 | 0 | 1      | 402.2296 | 1204.674 | 3.02  | 0.00121  | 44.0244  |
| P01042 | 0 | 1      | 673.6665 | 2018.985 | 2.43  | 0.00163  | 32.2427  |
| P01042 | 0 | 0.9412 | 515.7723 | 1030.537 | 1.71  | 0.00088  | 0        |
| P01042 | 1 | 1      | 482.9507 | 1446.838 | 1.97  | 0.00095  | 42.10269 |
| P01042 | 0 | 0.84   | 557.9616 | 1671.87  | 2.89  | 0.00161  | 3.240114 |
| P01042 | 1 | 0.7667 | 451.5751 | 1352.711 | 3.39  | 0.00153  | 9.794243 |
| P01042 | 0 | 0.913  | 610.3519 | 1219.696 | 3.26  | 0.00199  | 6.050193 |
| P01042 | 0 | 0.6383 | 494.8243 | 988.6413 | 1.98  | 0.00098  | 15.96551 |
| P01042 | 0 | 1      | 629.9897 | 1887.955 | 1.7   | 0.00107  | 62.70786 |
| P01042 | 0 | 0.5588 | 599.5635 | 2395.232 | 4.9   | 0.00293  | 5.377209 |
| P01042 | 0 | 0.7097 | 513.936  | 1539.793 | 0.03  | 0.00002  | 0        |
| P01042 | 0 | 0.9706 | 764.3868 | 1527.766 | 1.9   | 0.00145  | 35.20038 |
| P01042 | 0 | 0.5833 | 799.0793 | 2395.223 | 1.13  | 0.0009   | 14.97971 |
| P01042 | 0 | 0.8333 | 610.3518 | 1219.696 | 3.06  | 0.00187  | 15.85079 |
| P01042 | 0 | 0.8293 | 587.8223 | 1174.637 | -0.28 | -0.00016 | 3.218603 |
| P01042 | 0 | 0.9259 | 629.9885 | 1887.951 | -0.24 | -0.00015 | 17.76644 |
| P01042 | 0 | 1      | 513.9365 | 1539.795 | 1.1   | 0.00057  | 32.67638 |

|        |   |        |          |          |       |          |          |
|--------|---|--------|----------|----------|-------|----------|----------|
| P01042 | 0 | 0.94   | 502.2883 | 1003.569 | 0.98  | 0.00049  | 0        |
| P01042 | 0 | 0.8788 | 610.3516 | 1219.696 | 2.76  | 0.00168  | 9.72617  |
| P01042 | 0 | 0.9444 | 629.9902 | 1887.956 | 2.57  | 0.00162  | 43.00935 |
| P01042 | 0 | 0.9143 | 465.9028 | 1395.694 | 1.79  | 0.00083  | 9.618615 |
| P01042 | 0 | 0.9429 | 396.5607 | 1187.668 | 3.41  | 0.00135  | 15.20208 |
| P01042 | 1 | 0.9512 | 434.917  | 1302.736 | 2.88  | 0.00125  | 0        |
| P01042 | 1 | 0.9512 | 434.917  | 1302.736 | 2.88  | 0.00125  | 0        |
| P01042 | 0 | 0.9024 | 698.348  | 1395.689 | -1.78 | -0.00124 | 0        |
| P01042 | 0 | 0.9062 | 392.2186 | 1174.641 | 2.93  | 0.00115  | 34.80474 |
| P01042 | 0 | 0.6667 | 488.3095 | 975.6118 | 4.21  | 0.00206  | 14.78632 |
| P01042 | 0 | 0.8913 | 610.3514 | 1219.696 | 2.56  | 0.00156  | 6.124978 |
| P01042 | 0 | 1      | 610.3518 | 1219.696 | 3.06  | 0.00187  | 6.901563 |
| P01042 | 0 | 0.6429 | 488.3085 | 975.6098 | 2.15  | 0.00105  | 5.037911 |
| P01042 | 1 | 0.8293 | 434.9167 | 1302.736 | 2.25  | 0.00098  | 14.38482 |
| P01042 | 1 | 0.8293 | 434.9167 | 1302.736 | 2.25  | 0.00098  | 14.38482 |
| P01042 | 0 | 1      | 637.2868 | 1273.566 | 1.87  | 0.00119  | 9.049982 |
| P01042 | 0 | 1      | 637.2873 | 1273.567 | 2.64  | 0.00168  | 13.94588 |
| P01042 | 0 | 1      | 407.2365 | 1219.695 | 2.05  | 0.00083  | 46.67579 |
| P01042 | 0 | 0.5357 | 757.072  | 2269.202 | 0.81  | 0.00062  | 12.88046 |
| P01042 | 0 | 0.625  | 629.9914 | 1887.96  | 4.41  | 0.00278  | 20.89967 |
| P01042 | 0 | 0.2963 | 513.9377 | 1539.799 | 3.36  | 0.00173  | 4.76165  |
| P01042 | 0 | 0.8824 | 513.9366 | 1539.795 | 1.22  | 0.00063  | 22.72678 |
| P01042 | 0 | 1      | 637.2873 | 1273.567 | 2.64  | 0.00168  | 3.627483 |
| P01042 | 0 | 0.9444 | 757.0721 | 2269.202 | 0.98  | 0.00074  | 10.94758 |
| P01042 | 0 | 0.6316 | 488.308  | 975.6088 | 1.09  | 0.00053  | 45.02955 |
| P01042 | 0 | 1      | 709.3372 | 1417.667 | 0.81  | 0.00057  | 11.23495 |
| P01042 | 0 | 0.675  | 494.824  | 988.6408 | 1.48  | 0.00073  | 7.152709 |
| P01042 | 0 | 0.871  | 465.9024 | 1395.693 | 1.07  | 0.0005   | 7.832078 |
| P01042 | 0 | 0.963  | 698.3494 | 1395.691 | 0.14  | 0.0001   | 28.54879 |
| P01042 | 0 | 0.675  | 494.8242 | 988.641  | 1.73  | 0.00086  | 9.10708  |
| P01042 | 1 | 1      | 573.5526 | 2291.189 | 5.03  | 0.00288  | 10.79374 |
| P01042 | 0 | 1      | 637.2882 | 1273.569 | 3.98  | 0.00253  | 0        |
| P01042 | 1 | 0.9333 | 667.612  | 2667.426 | 3.21  | 0.00214  | 34.76399 |
| P06396 | 0 | 0.7692 | 1059.589 | 2118.171 | 1.28  | 0.00135  | 4.321578 |
| P06396 | 0 | 1      | 706.7284 | 2118.171 | 1.01  | 0.00072  | 4.852993 |
| P06396 | 0 | 0.8333 | 536.639  | 1607.902 | 1.78  | 0.00095  | 13.88729 |
| P06396 | 0 | 0.9417 | 804.4551 | 1607.903 | 2.09  | 0.00168  | 7.370104 |
| P06396 | 0 | 1      | 536.6391 | 1607.903 | 2.01  | 0.00108  | 21.10782 |
| P06396 | 0 | 0.8148 | 564.3121 | 1127.617 | 4.21  | 0.00237  | 28.22671 |
| P06396 | 0 | 1      | 854.1033 | 2560.295 | 1.28  | 0.00109  | 3.452702 |
| P06396 | 0 | 0.9143 | 640.8293 | 2560.295 | 1.22  | 0.00078  | 0        |
| P06396 | 0 | 1      | 854.1033 | 2560.295 | 1.28  | 0.00109  | 3.858436 |
| P06396 | 0 | 1      | 640.8297 | 2560.297 | 1.8   | 0.00115  | 4.219265 |
| P06396 | 1 | 1      | 428.2664 | 1282.785 | 0.23  | 0.0001   | 23.32552 |
| P06396 | 0 | 1      | 854.1054 | 2560.301 | 3.64  | 0.0031   | 7.177437 |
| P06396 | 0 | 1      | 854.1033 | 2560.295 | 1.28  | 0.00109  | 4.593058 |
| P06396 | 0 | 1      | 640.8298 | 2560.297 | 1.99  | 0.00127  | 3.928206 |
| P06396 | 0 | 1      | 854.1024 | 2560.293 | 0.2   | 0.00017  | 4.518157 |
| P06396 | 0 | 1      | 1280.651 | 2560.295 | 1     | 0.00127  | 0.796913 |
| P06396 | 0 | 0.9286 | 854.1049 | 2560.3   | 3.06  | 0.00261  | 0        |
| P06396 | 0 | 0.9333 | 806.0695 | 2416.194 | 1.61  | 0.0013   | 1.268101 |
| P06396 | 1 | 1      | 428.2679 | 1282.789 | 3.73  | 0.00159  | 18.03263 |

|        |   |        |          |          |       |          |          |
|--------|---|--------|----------|----------|-------|----------|----------|
| P06396 | 1 | 1      | 747.6265 | 2987.484 | 3.77  | 0.00281  | 37.11326 |
| P06396 | 1 | 1      | 747.6273 | 2987.487 | 4.91  | 0.00367  | 7.945455 |
| P06396 | 1 | 1      | 514.9722 | 1542.902 | 1.62  | 0.00083  | 9.065966 |
| P06396 | 0 | 0.8955 | 473.9451 | 1419.821 | 1.39  | 0.00066  | 3.623176 |
| P06396 | 0 | 0.9706 | 671.0206 | 2011.047 | 2.82  | 0.00189  | 13.79376 |
| P06396 | 0 | 0.9825 | 671.0201 | 2011.046 | 2.09  | 0.0014   | 18.12832 |
| P06396 | 0 | 0.9804 | 671.0207 | 2011.048 | 3     | 0.00201  | 10.81399 |
| P06396 | 0 | 0.9375 | 709.3729 | 2126.104 | 1.53  | 0.00108  | 2.264488 |
| P06396 | 0 | 0.8947 | 709.3728 | 2126.104 | 1.44  | 0.00102  | 7.818883 |
| P06396 | 0 | 1      | 1063.557 | 2126.107 | 2.79  | 0.00297  | 7.132674 |
| P06396 | 0 | 0.9412 | 709.3746 | 2126.109 | 3.94  | 0.00279  | 22.67377 |
| P06396 | 0 | 0.9706 | 709.3735 | 2126.106 | 2.39  | 0.00169  | 10.92132 |
| P06396 | 0 | 0.7447 | 709.3742 | 2126.108 | 3.42  | 0.00242  | 27.62198 |
| P06396 | 0 | 0.9762 | 844.4219 | 2531.251 | 0.65  | 0.00055  | 3.692496 |
| P06396 | 0 | 0.9792 | 671.0206 | 2011.047 | 2.91  | 0.00195  | 34.79568 |
| P06396 | 0 | 1      | 844.4226 | 2531.253 | 1.45  | 0.00122  | 3.598106 |
| P06396 | 0 | 1      | 844.4224 | 2531.253 | 1.23  | 0.00104  | 0        |
| P06396 | 1 | 1      | 460.2446 | 1378.719 | -0.28 | -0.00013 | 0        |
| P06396 | 1 | 1      | 413.9016 | 1239.69  | 2.7   | 0.00112  | 12.9063  |
| P06396 | 0 | 0.7586 | 554.8276 | 1108.648 | 2.41  | 0.00134  | 21.00542 |
| P06396 | 0 | 0.6923 | 536.9369 | 1608.796 | 1.93  | 0.00104  | 12.38954 |
| P06396 | 0 | 0.8077 | 536.9368 | 1608.796 | 1.71  | 0.00092  | 35.3954  |
| P06396 | 1 | 0.9815 | 700.0353 | 2098.091 | 1.78  | 0.00124  | 10.35054 |
| P06396 | 0 | 1      | 488.9026 | 1464.693 | 1.55  | 0.00076  | 34.82188 |
| P06396 | 0 | 0.9718 | 513.784  | 1026.561 | 1.88  | 0.00096  | 2.849683 |
| P06396 | 0 | 1      | 998.2035 | 2992.596 | 0.3   | 0.0003   | 9.271144 |
| P06396 | 0 | 1      | 473.9456 | 1419.822 | 2.3   | 0.00109  | 15.1963  |
| P06396 | 0 | 0.9254 | 572.3044 | 1143.602 | 2.55  | 0.00146  | 5.04193  |
| P06396 | 0 | 1      | 611.813  | 1222.619 | 0.22  | 0.00014  | 100      |
| P06396 | 0 | 0.881  | 609.8143 | 1218.621 | 1.46  | 0.00089  | 4.664033 |
| P06396 | 0 | 1      | 585.8348 | 1170.662 | 1.33  | 0.00078  | 14.24858 |
| P06396 | 0 | 1      | 585.8355 | 1170.664 | 2.47  | 0.00145  | 19.3546  |
| P06396 | 0 | 0.8286 | 640.8324 | 2560.308 | 6.09  | 0.0039   | 0        |
| P06396 | 0 | 0.9444 | 1280.651 | 2560.295 | 1.28  | 0.00164  | 2.534681 |
| P06396 | 0 | 0.5143 | 444.2516 | 887.4959 | 1.57  | 0.0007   | 4.244547 |
| P06396 | 0 | 0.75   | 536.9388 | 1608.802 | 5.58  | 0.00299  | 13.70866 |
| P06396 | 0 | 0.8571 | 505.798  | 1010.589 | 1.43  | 0.00072  | 9.834462 |
| P06396 | 0 | 0.9032 | 640.8305 | 2560.3   | 3.13  | 0.002    | 0        |
| P06396 | 0 | 0.9231 | 671.0201 | 2011.046 | 2.18  | 0.00146  | 44.88815 |
| P06396 | 0 | 1      | 488.9019 | 1464.691 | 0.17  | 0.00009  | 29.6614  |
| P06396 | 0 | 0.9375 | 408.2125 | 1222.623 | 3.68  | 0.0015   | 0        |
| P06396 | 0 | 1      | 473.9454 | 1419.822 | 2.04  | 0.00096  | 31.01327 |
| P06396 | 1 | 0.7368 | 525.2772 | 2098.087 | -0.35 | -0.00019 | 27.12704 |
| P06396 | 0 | 0.5946 | 576.7869 | 1152.566 | 3.64  | 0.0021   | 3.903802 |
| P06396 | 1 | 1      | 641.897  | 1282.787 | 1.93  | 0.00124  | 7.035858 |
| P06396 | 0 | 0.775  | 482.7756 | 964.544  | 0.89  | 0.00043  | 0        |
| P06396 | 1 | 0.7391 | 401.2678 | 1201.789 | 1.47  | 0.00059  | 9.425853 |
| P06396 | 0 | 0.8605 | 523.3475 | 1045.688 | 1.65  | 0.00086  | 0        |
| P06396 | 0 | 0.65   | 536.9367 | 1608.796 | 1.59  | 0.00085  | 58.99189 |
| P06396 | 0 | 0.9032 | 609.8156 | 1218.624 | 3.56  | 0.00217  | 39.98104 |
| P06396 | 1 | 1      | 436.2864 | 1306.845 | 2.1   | 0.00092  | 54.4599  |
| P06396 | 0 | 0.5581 | 516.3026 | 1031.598 | 1.22  | 0.00063  | 2.898581 |



|        |   |        |          |          |       |          |          |
|--------|---|--------|----------|----------|-------|----------|----------|
| P06396 | 0 | 0.9767 | 571.8259 | 1142.645 | 0.63  | 0.00036  | 3.070138 |
| P06396 | 0 | 0.9667 | 609.816  | 1218.625 | 4.36  | 0.00266  | 0        |
| P06396 | 0 | 0.7209 | 523.3474 | 1045.687 | 1.42  | 0.00074  | 100      |
| P06396 | 1 | 1      | 386.4808 | 1542.902 | 1.33  | 0.00051  | 14.56154 |
| P06396 | 0 | 0.8919 | 564.3115 | 1127.616 | 3.12  | 0.00176  | 6.131098 |
| P06396 | 0 | 1      | 484.249  | 967.4907 | 0.74  | 0.00036  | 2.149233 |
| P06396 | 0 | 1      | 585.8364 | 1170.666 | 4.04  | 0.00236  | 22.41522 |
| P06396 | 0 | 0.7027 | 381.5539 | 1142.647 | 2.87  | 0.00109  | 3.404617 |
| P06396 | 0 | 0.75   | 522.3395 | 1043.672 | 1.44  | 0.00075  | 26.34965 |
| P06396 | 0 | 0.8    | 482.7758 | 964.5442 | 1.14  | 0.00055  | 24.3253  |
| P06396 | 0 | 0.8125 | 854.1025 | 2560.293 | 0.35  | 0.0003   | 5.999435 |
| P06396 | 0 | 0.8857 | 523.3477 | 1045.688 | 2.12  | 0.00111  | 0        |
| P06396 | 0 | 0.5    | 576.7859 | 1152.565 | 1.95  | 0.00112  | 0        |
| P02647 | 0 | 1      | 844.9425 | 1688.878 | 2.59  | 0.00219  | 0        |
| P02647 | 0 | 0.9583 | 844.9418 | 1688.876 | 1.72  | 0.00145  | 6.633591 |
| P02647 | 0 | 0.9571 | 563.6304 | 1688.877 | 2     | 0.00113  | 9.600135 |
| P02647 | 2 | 1      | 470.451  | 2348.226 | 1.72  | 0.00081  | 2.884918 |
| P02647 | 1 | 0.7872 | 567.2975 | 1699.878 | 3.72  | 0.00211  | 3.558731 |
| P02647 | 1 | 0.878  | 567.2968 | 1699.876 | 2.53  | 0.00143  | 7.240958 |
| P02647 | 1 | 0.8409 | 567.297  | 1699.876 | 2.85  | 0.00162  | 4.783349 |
| P02647 | 1 | 1      | 516.7697 | 2064.057 | -2.46 | -0.00127 | 13.59094 |
| P02647 | 0 | 1      | 699.6626 | 2096.973 | 1.78  | 0.00125  | 1.946368 |
| P02647 | 0 | 0.9464 | 699.6629 | 2096.974 | 2.22  | 0.00155  | 11.52986 |
| P02647 | 0 | 0.9455 | 699.6625 | 2096.973 | 1.7   | 0.00119  | 2.609882 |
| P02647 | 0 | 0.7045 | 563.6316 | 1688.88  | 4.06  | 0.00229  | 35.56144 |
| P02647 | 0 | 0.9444 | 699.6629 | 2096.974 | 2.22  | 0.00155  | 8.594824 |
| P02647 | 0 | 0.8511 | 699.6625 | 2096.973 | 1.7   | 0.00119  | 10.36652 |
| P02647 | 0 | 0.9804 | 699.6631 | 2096.975 | 2.48  | 0.00174  | 8.636162 |
| P02647 | 1 | 1      | 688.6932 | 2064.065 | 1.48  | 0.00102  | 5.538224 |
| P02647 | 0 | 0.9559 | 699.6631 | 2096.975 | 2.48  | 0.00174  | 9.949135 |
| P02647 | 0 | 0.9167 | 770.9185 | 1540.83  | 3.04  | 0.00234  | 16.92712 |
| P02647 | 0 | 0.9184 | 514.2811 | 1540.829 | 2.4   | 0.00123  | 8.841324 |
| P02647 | 0 | 0.9219 | 770.9183 | 1540.829 | 2.88  | 0.00222  | 5.868382 |
| P02647 | 0 | 1      | 651.6285 | 1952.871 | 1.86  | 0.00121  | 20.37416 |
| P02647 | 0 | 1      | 482.5895 | 1445.754 | 2.4   | 0.00116  | 12.40576 |
| P02647 | 0 | 1      | 501.9474 | 1503.828 | 1.28  | 0.00064  | 34.04776 |
| P02647 | 0 | 1      | 482.5893 | 1445.753 | 1.89  | 0.00091  | 0        |
| P02647 | 0 | 1      | 723.3799 | 1445.753 | 1.46  | 0.00105  | 0        |
| P02647 | 0 | 0.8387 | 434.2666 | 1300.785 | 2.03  | 0.00088  | 15.9908  |
| P02647 | 2 |        | 467.7679 | 1868.05  | 1.5   | 0.0007   | 5.348342 |
| P02647 | 2 | 0.0833 | 623.3552 | 1868.051 | 2.1   | 0.00131  | 3.255819 |
| P02647 | 0 | 0.9787 | 434.555  | 1301.65  | 1.45  | 0.00063  | 15.69891 |
| P02647 | 0 | 0.7925 | 690.4002 | 1379.793 | 2.1   | 0.00145  | 13.61261 |
| P02647 | 0 | 0.8824 | 741.0517 | 2221.141 | 1.18  | 0.00088  | 6.397406 |
| P02647 | 0 | 0.75   | 508.6362 | 1523.894 | 1.08  | 0.00055  | 2.333223 |
| P02647 | 0 | 0.9302 | 762.4508 | 1523.894 | 1.33  | 0.00101  | 8.999641 |
| P02647 | 0 | 0.806  | 508.6362 | 1523.894 | 1.08  | 0.00055  | 8.609177 |
| P02647 | 0 | 1      | 762.4506 | 1523.894 | 1.09  | 0.00083  | 2.488898 |
| P02647 | 0 | 0.9529 | 762.4507 | 1523.894 | 1.17  | 0.00089  | 3.445343 |
| P02647 | 0 | 0.8676 | 741.0527 | 2221.144 | 2.58  | 0.00191  | 7.858632 |
| P02647 | 0 | 0.9634 | 741.0523 | 2221.142 | 2.01  | 0.00149  | 0        |
| P02647 | 0 | 0.9231 | 741.0522 | 2221.142 | 1.84  | 0.00136  | 10.81566 |

|        |   |        |          |          |       |          |          |
|--------|---|--------|----------|----------|-------|----------|----------|
| P02647 | 0 | 0.913  | 741.0504 | 2221.137 | -0.55 | -0.00041 | 0        |
| P02647 | 0 | 0.9677 | 741.0513 | 2221.139 | 0.69  | 0.00051  | 8.675595 |
| P02647 | 0 | 1      | 693.0176 | 2077.038 | 1.12  | 0.00078  | 1.507469 |
| P02647 | 0 | 1      | 693.0179 | 2077.039 | 1.57  | 0.00108  | 27.82154 |
| P02647 | 0 | 1      | 741.0518 | 2221.141 | 1.35  | 0.001    | 4.535439 |
| P02647 | 0 | 0.8923 | 556.0413 | 2221.143 | 2.39  | 0.00133  | 8.563459 |
| P02647 | 0 | 1      | 1111.075 | 2221.142 | 1.9   | 0.00211  | 0.702934 |
| P02647 | 0 | 1      | 741.051  | 2221.138 | 0.19  | 0.00014  | 4.111861 |
| P02647 | 0 | 1      | 556.0408 | 2221.142 | 1.62  | 0.0009   | 7.394027 |
| P02647 | 0 | 1      | 1111.074 | 2221.14  | 1.13  | 0.00126  | 0.876546 |
| P02647 | 0 | 1      | 741.0508 | 2221.138 | -0.05 | -0.00004 | 4.415444 |
| P02647 | 0 | 1      | 556.0415 | 2221.144 | 2.83  | 0.00157  | 10.06732 |
| P02647 | 0 | 1      | 1111.074 | 2221.141 | 1.24  | 0.00138  | 0        |
| P02647 | 0 | 1      | 741.0507 | 2221.137 | -0.22 | -0.00016 | 4.368874 |
| P02647 | 0 | 0.9167 | 741.0525 | 2221.143 | 2.25  | 0.00167  | 0        |
| P02647 | 0 | 1      | 741.052  | 2221.141 | 1.6   | 0.00118  | 3.769292 |
| P02647 | 0 | 0.9903 | 1039.023 | 2077.04  | 1.81  | 0.00188  | 0        |
| P02647 | 0 | 0.9571 | 693.0172 | 2077.037 | 0.51  | 0.00035  | 2.379014 |
| P02647 | 0 | 0.931  | 741.0532 | 2221.145 | 3.24  | 0.0024   | 13.2833  |
| P02647 | 0 | 0.9565 | 741.0516 | 2221.14  | 1.1   | 0.00082  | 10.02585 |
| P02647 | 0 | 1      | 741.0511 | 2221.139 | 0.36  | 0.00027  | 12.5403  |
| P02647 | 0 | 1      | 741.0516 | 2221.14  | 1.1   | 0.00082  | 4.420992 |
| P02647 | 0 | 0.8654 | 1111.075 | 2221.143 | 2.45  | 0.00272  | 0.703947 |
| P02647 | 0 | 1      | 741.0517 | 2221.141 | 1.18  | 0.00088  | 4.647928 |
| P02647 | 0 | 1      | 1111.075 | 2221.142 | 1.9   | 0.00211  | 0.23766  |
| P02647 | 0 | 1      | 741.0509 | 2221.138 | 0.11  | 0.00008  | 4.506809 |
| P02647 | 0 | 0.9861 | 1111.074 | 2221.142 | 1.68  | 0.00187  | 0        |
| P02647 | 0 | 1      | 741.0508 | 2221.138 | -0.05 | -0.00004 | 4.306448 |
| P02647 | 0 | 0.9322 | 556.0411 | 2221.142 | 2.06  | 0.00114  | 3.809138 |
| P02647 | 0 | 0.9859 | 1111.074 | 2221.141 | 1.24  | 0.00138  | 6.381742 |
| P02647 | 0 | 1      | 741.0508 | 2221.138 | 0.03  | 0.00002  | 4.472652 |
| P02647 | 0 | 0.9892 | 1111.074 | 2221.14  | 0.91  | 0.00102  | 0.150761 |
| P02647 | 0 | 1      | 741.0507 | 2221.137 | -0.22 | -0.00016 | 4.293705 |
| P02647 | 0 | 0.8723 | 556.0411 | 2221.142 | 2.06  | 0.00114  | 3.845432 |
| P02647 | 0 | 1      | 1111.074 | 2221.14  | 1.13  | 0.00126  | 0        |
| P02647 | 0 | 1      | 741.0507 | 2221.138 | -0.14 | -0.0001  | 4.242296 |
| P02647 | 0 | 1      | 741.052  | 2221.141 | 1.6   | 0.00118  | 6.544406 |
| P02647 | 0 | 0.8889 | 741.0518 | 2221.141 | 1.35  | 0.001    | 13.04666 |
| P02647 | 0 | 0.8788 | 741.0507 | 2221.137 | -0.22 | -0.00016 | 12.97937 |
| P02647 | 0 | 1      | 741.0523 | 2221.142 | 1.93  | 0.00143  | 12.5852  |
| P02647 | 0 | 1      | 563.6307 | 1688.877 | 2.44  | 0.00137  | 34.51334 |
| P02647 | 0 | 0.9783 | 844.9421 | 1688.877 | 2.15  | 0.00182  | 7.286695 |
| P02647 | 0 | 0.9362 | 563.6306 | 1688.877 | 2.22  | 0.00125  | 8.778948 |
| P02647 | 0 | 1      | 844.941  | 1688.875 | 0.78  | 0.00066  | 6.123175 |
| P02647 | 0 | 0.9744 | 563.6294 | 1688.874 | 0.16  | 0.00009  | 8.293533 |
| P02647 | 0 | 1      | 844.9402 | 1688.873 | -0.16 | -0.00013 | 6.543588 |
| P02647 | 0 | 0.9747 | 563.6293 | 1688.873 | -0.06 | -0.00003 | 7.92499  |
| P02647 | 0 | 0.96   | 563.6317 | 1688.881 | 4.28  | 0.00241  | 20.01157 |
| P02647 | 0 | 0.9434 | 563.6317 | 1688.881 | 4.28  | 0.00241  | 38.87373 |
| P02647 | 0 | 0.7907 | 714.3414 | 1427.675 | 0.63  | 0.00045  | 4.203743 |
| P02647 | 0 | 0.6727 | 476.5633 | 1427.675 | 0.6   | 0.00029  | 2.480297 |
| P02647 | 0 | 0.9697 | 772.8882 | 1544.769 | -1.35 | -0.00104 | 0        |

|        |   |        |          |          |       |          |          |
|--------|---|--------|----------|----------|-------|----------|----------|
| P02647 | 0 | 0.9296 | 563.6308 | 1688.878 | 2.65  | 0.00149  | 18.27896 |
| P02647 | 0 | 0.9778 | 844.9417 | 1688.876 | 1.58  | 0.00133  | 6.48517  |
| P02647 | 0 | 0.9615 | 515.5961 | 1544.774 | 1.64  | 0.00085  | 4.429919 |
| P02647 | 0 | 1      | 772.8904 | 1544.774 | 1.49  | 0.00115  | 2.761238 |
| P02647 | 0 | 0.9483 | 741.0526 | 2221.143 | 2.42  | 0.00179  | 4.888702 |
| P02647 | 0 | 0.9048 | 741.0505 | 2221.137 | -0.38 | -0.00028 | 0        |
| P02647 | 0 | 0.62   | 560.3238 | 1119.64  | 0.22  | 0.00013  | 0        |
| P02647 | 0 | 0.9722 | 693.0178 | 2077.039 | 1.48  | 0.00102  | 22.79571 |
| P02647 | 0 | 0.9737 | 434.2667 | 1300.786 | 2.18  | 0.00094  | 12.08527 |
| P02647 | 0 | 0.9655 | 434.267  | 1300.787 | 2.95  | 0.00128  | 16.34788 |
| P02647 | 0 | 0.7778 | 434.267  | 1300.786 | 2.88  | 0.00125  | 30.12613 |
| P02647 | 0 | 1      | 501.9486 | 1503.831 | 3.72  | 0.00186  | 0        |
| P02647 | 0 | 0.8033 | 558.979  | 1674.922 | 1.92  | 0.00107  | 7.644935 |
| P02647 | 0 | 0.9318 | 837.9647 | 1674.922 | 1.67  | 0.0014   | 5.781969 |
| P02647 | 0 | 0.8065 | 434.2658 | 1300.783 | 0.13  | 0.00006  | 17.6015  |
| P02647 | 0 | 1      | 434.2669 | 1300.786 | 2.67  | 0.00116  | 14.19855 |
| P02647 | 0 | 0.7059 | 509.2768 | 1017.546 | 1.75  | 0.00089  | 2.482932 |
| P02647 | 0 | 0.9756 | 765.9125 | 1530.818 | 0.4   | 0.00031  | 15.2144  |
| P02647 | 0 | 1      | 482.5882 | 1445.75  | -0.32 | -0.00016 | 54.21256 |
| P02647 | 0 | 0.8448 | 434.5554 | 1301.652 | 2.37  | 0.00103  | 4.590828 |
| P02647 | 0 | 0.7719 | 586.301  | 1756.888 | 0.54  | 0.00032  | 3.970651 |
| P02647 | 0 | 0.9386 | 878.9481 | 1756.889 | 0.83  | 0.00073  | 3.874524 |
| P02647 | 0 | 0.8    | 762.4517 | 1523.896 | 2.53  | 0.00193  | 13.38053 |
| P02647 | 0 | 0.7708 | 508.6368 | 1523.896 | 2.28  | 0.00116  | 2.558283 |
| P02647 | 0 | 1      | 950.9997 | 1900.992 | 1.4   | 0.00133  | 5.849488 |
| P02647 | 0 | 1      | 634.3356 | 1900.992 | 1.52  | 0.00096  | 9.524952 |
| P02647 | 0 | 0.9254 | 634.3364 | 1900.995 | 2.68  | 0.0017   | 11.91869 |
| P02647 | 1 | 0.9231 | 632.3914 | 1895.16  | 1.03  | 0.00065  | 14.93789 |
| P02647 | 1 | 0.807  | 948.0842 | 1895.161 | 1.81  | 0.00172  | 7.26764  |
| P02647 | 1 | 0.9787 | 474.5456 | 1895.161 | 1.48  | 0.0007   | 11.75959 |
| P02647 | 1 | 0.9592 | 632.3916 | 1895.16  | 1.32  | 0.00084  | 17.75703 |
| P02647 | 1 | 0.9032 | 632.3916 | 1895.16  | 1.32  | 0.00084  | 10.92754 |
| P02647 | 1 | 0.9737 | 632.3903 | 1895.156 | -0.71 | -0.00045 | 66.89497 |
| P02647 | 0 | 0.8947 | 634.3367 | 1900.996 | 3.25  | 0.00206  | 12.36575 |
| P02647 | 0 | 0.9444 | 634.3366 | 1900.995 | 3.06  | 0.00194  | 6.441699 |
| P02647 | 0 | 0.9231 | 634.3353 | 1900.991 | 1.04  | 0.00066  | 5.650203 |
| P02647 | 0 | 1      | 501.9472 | 1503.827 | 0.98  | 0.00049  | 0        |
| P02647 | 1 | 1      | 529.2749 | 1585.81  | 1.28  | 0.00067  | 8.377966 |
| P02647 | 1 | 1      | 397.208  | 1585.81  | 1.15  | 0.00046  | 6.601691 |
| P02647 | 0 | 0.8621 | 762.4525 | 1523.898 | 3.49  | 0.00266  | 38.10745 |
| P02647 | 0 | 0.9789 | 837.9646 | 1674.922 | 1.6   | 0.00134  | 7.451027 |
| P02647 | 0 | 0.8077 | 558.9781 | 1674.92  | 0.28  | 0.00015  | 8.65478  |
| P02647 | 1 | 0.6061 | 830.7796 | 2490.324 | 0.47  | 0.00039  | 20.3045  |
| P02647 | 0 | 0.98   | 837.9641 | 1674.921 | 0.94  | 0.00079  | 9.894595 |
| P02647 | 0 | 0.8305 | 558.9781 | 1674.92  | 0.28  | 0.00015  | 8.035325 |
| P02647 | 1 | 0.9804 | 830.781  | 2490.328 | 2.16  | 0.00179  | 8.870957 |
| P02647 | 1 | 1      | 830.7801 | 2490.326 | 1.06  | 0.00088  | 4.209022 |
| P02647 | 0 | 0.99   | 837.9655 | 1674.924 | 2.69  | 0.00225  | 15.72826 |
| P02647 | 0 | 0.9074 | 558.9797 | 1674.925 | 3.23  | 0.0018   | 8.836884 |
| P02647 | 0 | 0.9143 | 765.9134 | 1530.82  | 1.52  | 0.00116  | 5.603437 |
| P02647 | 0 | 0.94   | 741.0517 | 2221.141 | 1.18  | 0.00088  | 9.548424 |
| P02647 | 0 | 1      | 837.9639 | 1674.92  | 0.72  | 0.0006   | 19.68897 |

|        |   |        |          |          |       |          |          |
|--------|---|--------|----------|----------|-------|----------|----------|
| P02647 | 0 | 1      | 837.9639 | 1674.92  | 0.72  | 0.0006   | 29.99844 |
| P02647 | 0 | 0.8657 | 558.978  | 1674.919 | 0.06  | 0.00003  | 8.076765 |
| P02647 | 1 | 0.8358 | 584.3574 | 1751.058 | 1.16  | 0.00068  | 0        |
| P02647 | 1 | 0.8358 | 584.3574 | 1751.058 | 1.16  | 0.00068  | 0        |
| P02647 | 0 | 0.907  | 741.0521 | 2221.142 | 1.68  | 0.00124  | 3.771213 |
| P02647 | 0 | 0.9231 | 762.4511 | 1523.895 | 1.73  | 0.00132  | 4.640319 |
| P02647 | 0 | 0.8254 | 508.6364 | 1523.895 | 1.5   | 0.00076  | 8.419141 |
| P02647 | 0 | 0.9333 | 762.4496 | 1523.892 | -0.27 | -0.00021 | 6.089044 |
| P02647 | 0 | 0.8901 | 765.9135 | 1530.82  | 1.59  | 0.00122  | 4.138356 |
| P02647 | 0 | 1      | 642.2914 | 1283.575 | 2.33  | 0.00149  | 23.06001 |
| P02647 | 0 | 0.75   | 434.5545 | 1301.649 | 0.33  | 0.00014  | 26.70376 |
| P02647 | 0 | 0.8684 | 434.555  | 1301.65  | 1.52  | 0.00066  | 16.79145 |
| P02647 | 0 | 1      | 651.329  | 1301.651 | 1.82  | 0.00118  | 3.764178 |
| P02647 | 0 | 0.8889 | 434.5551 | 1301.651 | 1.74  | 0.00075  | 1.296639 |
| P02647 | 0 | 0.7826 | 434.555  | 1301.65  | 1.52  | 0.00066  | 8.923704 |
| P02647 | 1 | 0.7442 | 792.9769 | 1584.946 | 1.97  | 0.00156  | 0        |
| P02647 | 1 | 1      | 528.9865 | 1584.945 | 1.04  | 0.00055  | 16.22796 |
| P02647 | 1 | 0.9796 | 632.3931 | 1895.165 | 3.74  | 0.00236  | 57.83123 |
| P02647 | 0 | 0.9531 | 634.3359 | 1900.993 | 2     | 0.00127  | 12.15117 |
| P02647 | 0 | 0.8636 | 634.3358 | 1900.993 | 1.81  | 0.00115  | 29.6317  |
| P02647 | 0 | 1      | 687.9105 | 1374.814 | 1.7   | 0.00117  | 3.931486 |
| P02647 | 0 | 1      | 501.9476 | 1503.828 | 1.65  | 0.00083  | 51.26196 |
| P02647 | 0 | 0.9322 | 634.3357 | 1900.993 | 1.62  | 0.00102  | 15.06355 |
| P02647 | 0 | 0.9464 | 634.3361 | 1900.994 | 2.29  | 0.00145  | 9.686314 |
| P02647 | 0 | 1      | 634.3347 | 1900.99  | 0.08  | 0.00005  | 8.407166 |
| P02647 | 0 | 0.974  | 759.9609 | 1518.914 | 0.72  | 0.00055  | 5.91537  |
| P02647 | 0 | 0.9825 | 634.3348 | 1900.99  | 0.17  | 0.00011  | 19.31782 |
| P02647 | 0 | 0.873  | 506.9766 | 1518.915 | 1.28  | 0.00065  | 8.104663 |
| P02647 | 0 | 0.9833 | 476.0035 | 1900.992 | 1.38  | 0.00066  | 0        |
| P02647 | 0 | 1      | 950.9995 | 1900.992 | 1.14  | 0.00109  | 5.783334 |
| P02647 | 0 | 0.9846 | 759.9607 | 1518.914 | 0.48  | 0.00037  | 5.668058 |
| P02647 | 0 | 0.98   | 506.9774 | 1518.918 | 2.78  | 0.00141  | 8.014697 |
| P02647 | 0 | 0.9038 | 951.0004 | 1900.993 | 2.11  | 0.002    | 0        |
| P02647 | 0 | 0.9846 | 759.9622 | 1518.917 | 2.41  | 0.00183  | 6.948265 |
| P02647 | 0 | 1      | 501.9473 | 1503.827 | 1.1   | 0.00055  | 12.28884 |
| P02647 | 0 | 1      | 501.9473 | 1503.827 | 1.1   | 0.00055  | 0        |
| P02647 | 0 | 1      | 501.9492 | 1503.833 | 4.87  | 0.00244  | 16.91023 |
| P02647 | 0 | 0.8333 | 634.3362 | 1900.994 | 2.48  | 0.00157  | 7.613402 |
| P02647 | 0 | 0.9    | 634.3369 | 1900.996 | 3.54  | 0.00225  | 16.34534 |
| P02647 | 1 | 1      | 528.9862 | 1584.944 | 0.34  | 0.00018  | 11.88418 |
| P02647 | 0 | 1      | 501.9475 | 1503.828 | 1.4   | 0.00007  | 19.35593 |
| P02647 | 0 | 0.8378 | 386.2325 | 1156.683 | 1.88  | 0.00072  | 20.14937 |
| P02647 | 0 | 0.8378 | 386.2325 | 1156.683 | 1.88  | 0.00072  | 20.14937 |
| P02647 | 0 | 1      | 482.589  | 1445.752 | 1.26  | 0.00061  | 7.066054 |
| P02647 | 0 | 0.8571 | 434.5552 | 1301.651 | 1.88  | 0.00081  | 0        |
| P02647 | 0 | 1      | 482.5887 | 1445.751 | 0.63  | 0.00003  | 49.77322 |
| P02647 | 0 | 0.9796 | 482.5888 | 1445.752 | 0.88  | 0.00042  | 17.09196 |
| P02647 | 0 | 0.8889 | 434.5547 | 1301.649 | 0.75  | 0.00033  | 0.094391 |
| P02647 | 0 | 1      | 434.5547 | 1301.649 | 0.75  | 0.00033  | 51.20749 |
| P02647 | 0 | 0.873  | 434.555  | 1301.65  | 1.45  | 0.00063  | 0.484491 |
| P02647 | 0 | 1      | 482.5888 | 1445.752 | 0.88  | 0.00042  | 48.25791 |
| P02647 | 0 | 0.875  | 434.5549 | 1301.65  | 1.31  | 0.00057  | 0.396241 |

|        |   |        |          |          |       |          |          |
|--------|---|--------|----------|----------|-------|----------|----------|
| P02647 | 0 | 1      | 482.5892 | 1445.753 | 1.83  | 0.00088  | 17.06632 |
| P02647 | 0 | 1      | 482.5887 | 1445.752 | 0.75  | 0.00036  | 5.194019 |
| P02647 | 0 | 1      | 482.5883 | 1445.75  | -0.13 | -0.00006 | 13.64258 |
| P02647 | 0 | 1      | 482.589  | 1445.752 | 1.32  | 0.00064  | 4.406243 |
| P02647 | 0 | 1      | 482.5892 | 1445.753 | 1.7   | 0.00082  | 10.64865 |
| P02647 | 0 | 1      | 723.3798 | 1445.752 | 1.29  | 0.00093  | 3.092375 |
| P02647 | 0 | 1      | 482.5884 | 1445.751 | 0.06  | 0.00003  | 4.649761 |
| P02647 | 0 | 1      | 501.9469 | 1503.826 | 0.25  | 0.00012  | 15.99891 |
| P02647 | 0 | 1      | 723.3804 | 1445.753 | 2.05  | 0.00148  | 0        |
| P02647 | 1 | 1      | 567.2967 | 1699.876 | 2.31  | 0.00131  | 10.16533 |
| P02647 | 1 | 1      | 567.296  | 1699.873 | 1.02  | 0.00058  | 8.106999 |
| P02647 | 1 | 0.8409 | 567.2969 | 1699.876 | 2.64  | 0.00149  | 8.174891 |
| P02647 | 1 | 0.8611 | 567.2974 | 1699.878 | 3.5   | 0.00198  | 7.827622 |
| P02647 | 0 | 1      | 698.8668 | 1396.726 | 2.49  | 0.00174  | 3.336842 |
| P02647 | 1 | 0.8919 | 567.2979 | 1699.879 | 4.47  | 0.00253  | 27.3749  |
| P02647 | 1 | 1      | 567.2964 | 1699.875 | 1.78  | 0.00101  | 7.38408  |
| P02647 | 1 | 0.8649 | 567.2972 | 1699.877 | 3.28  | 0.00186  | 8.639947 |
| P02647 | 0 | 0.9091 | 588.3158 | 1175.624 | 2.76  | 0.00162  | 3.744691 |
| P02647 | 0 | 0.8649 | 434.2664 | 1300.785 | 1.47  | 0.00064  | 14.38031 |
| P02647 | 0 | 1      | 434.2667 | 1300.785 | 2.11  | 0.00091  | 13.65612 |
| P02647 | 0 | 0.96   | 482.5882 | 1445.75  | -0.39 | -0.00019 | 44.09173 |
| P02647 | 0 | 0.9688 | 434.2658 | 1300.783 | -0.01 | 0        | 8.102496 |
| P02647 | 0 | 0.8824 | 434.2658 | 1300.783 | 0.06  | 0.00003  | 8.281363 |
| P02647 | 0 | 1      | 482.5892 | 1445.753 | 1.83  | 0.00088  | 5.38298  |
| P02647 | 0 | 1      | 501.948  | 1503.83  | 2.56  | 0.00128  | 21.80379 |
| P02647 | 2 | 1      | 503.7935 | 2012.152 | 1.57  | 0.00079  | 14.66811 |
| P02647 | 0 | 0.6667 | 509.2764 | 1017.546 | 0.97  | 0.00049  | 3.552976 |
| P02647 | 0 | 0.8966 | 434.2674 | 1300.788 | 3.72  | 0.00161  | 5.999357 |
| P02647 | 0 | 0.898  | 514.2809 | 1540.828 | 2.16  | 0.00111  | 9.294912 |
| P02647 | 0 | 1      | 770.916  | 1540.825 | -0.21 | -0.00016 | 6.178564 |
| P02647 | 0 | 0.9667 | 434.2668 | 1300.786 | 2.32  | 0.001    | 21.32402 |
| P02647 | 0 | 0.913  | 514.2806 | 1540.827 | 1.45  | 0.00074  | 6.598859 |
| P02647 | 0 | 0.8864 | 514.2805 | 1540.827 | 1.21  | 0.00062  | 8.023529 |
| P02647 | 0 | 1      | 770.9157 | 1540.824 | -0.61 | -0.00047 | 5.799671 |
| P02647 | 0 | 1      | 723.3796 | 1445.752 | 0.95  | 0.00069  | 3.080201 |
| P02647 | 0 | 0.9348 | 514.2802 | 1540.826 | 0.61  | 0.00032  | 9.670235 |
| P02647 | 1 | 1      | 537.9701 | 1611.896 | 1.39  | 0.00075  | 20.0581  |
| P02647 | 0 | 0.94   | 563.6308 | 1688.878 | 2.65  | 0.00149  | 13.14654 |
| P02647 | 0 | 1      | 482.5885 | 1445.751 | 0.37  | 0.00018  | 4.284438 |
| P02647 | 0 | 1      | 723.3804 | 1445.753 | 2.05  | 0.00148  | 3.325203 |
| P02647 | 0 | 1      | 482.5889 | 1445.752 | 1.2   | 0.00058  | 4.731243 |
| P02647 | 0 | 1      | 501.9477 | 1503.828 | 1.83  | 0.00092  | 24.31637 |
| P02647 | 0 | 1      | 501.9466 | 1503.825 | -0.36 | -0.00018 | 8.028794 |
| P02647 | 0 | 1      | 752.4171 | 1503.827 | 0.84  | 0.00063  | 5.547592 |
| P02647 | 0 | 1      | 501.9465 | 1503.825 | -0.48 | -0.00024 | 6.869234 |
| P02647 | 0 | 0.7021 | 509.2765 | 1017.546 | 1.21  | 0.00061  | 1.791536 |
| P02647 | 0 | 0.9512 | 514.2809 | 1540.828 | 2.04  | 0.00105  | 29.47437 |
| P02647 | 0 | 0.9444 | 693.0186 | 2077.041 | 2.62  | 0.00182  | 14.43799 |
| P02647 | 0 | 0.913  | 516.2639 | 1031.521 | 1.5   | 0.00077  | 1.358717 |
| P02647 | 0 | 0.9762 | 434.5554 | 1301.652 | 2.37  | 0.00103  | 21.27335 |
| P02647 | 0 | 0.96   | 501.9468 | 1503.826 | 0     | 0        | 59.16982 |
| P02647 | 0 | 1      | 699.6632 | 2096.975 | 2.66  | 0.00186  | 64.82291 |

|        |   |        |          |          |       |          |          |
|--------|---|--------|----------|----------|-------|----------|----------|
| P02647 | 0 | 0.8788 | 501.9486 | 1503.831 | 3.59  | 0.0018   | 54.46451 |
| P02647 | 0 | 0.9149 | 772.8893 | 1544.771 | -0.01 | -0.00001 | 0        |
| P02647 | 1 | 1      | 396.9912 | 1584.943 | -0.36 | -0.00014 | 12.45849 |
| P02647 | 0 | 0.7895 | 476.5638 | 1427.677 | 1.69  | 0.0008   | 37.60398 |
| P02647 | 0 | 0.925  | 563.6304 | 1688.877 | 2     | 0.00113  | 20.69114 |
| P02647 | 0 | 0.78   | 651.3292 | 1301.651 | 2.1   | 0.00136  | 0        |
| P02647 | 0 | 0.3529 | 714.3427 | 1427.678 | 2.51  | 0.00179  | 16.92611 |
| P02647 | 0 | 1      | 434.2651 | 1300.781 | -1.48 | -0.00064 | 36.14016 |
| P02647 | 0 | 1      | 651.3291 | 1301.651 | 1.91  | 0.00124  | 0        |
| P02647 | 1 | 0.9048 | 519.2628 | 1555.774 | 2.81  | 0.00146  | 11.01931 |
| P02647 | 1 | 0.9048 | 519.2628 | 1555.774 | 2.81  | 0.00146  | 11.01931 |
| P02647 | 0 | 0.8333 | 741.0515 | 2221.14  | 0.85  | 0.00063  | 5.141618 |
| P02647 | 0 | 1      | 482.5891 | 1445.753 | 1.45  | 0.0007   | 10.18239 |
| P02647 | 0 | 0.6557 | 488.2729 | 975.5384 | 0.46  | 0.00022  | 0        |
| P02647 | 0 | 0.6444 | 509.2767 | 1017.546 | 1.51  | 0.00077  | 0        |
| P02647 | 2 | 1      | 587.8123 | 2348.227 | 2.3   | 0.00135  | 0.550985 |
| P02647 | 0 | 0.8636 | 488.2727 | 975.5381 | 0.08  | 0.00004  | 4.785724 |
| P02647 | 0 | 0.7391 | 714.3413 | 1427.675 | 0.46  | 0.00033  | 8.90386  |
| P02647 | 1 | 0.8684 | 572.6286 | 1715.871 | 2.77  | 0.00158  | 9.342708 |
| P02647 | 0 | 0.913  | 772.8919 | 1544.777 | 3.39  | 0.00262  | 0        |
| P02647 | 0 | 0.8824 | 588.3145 | 1175.622 | 0.58  | 0.00034  | 3.178979 |
| P02647 | 0 | 0.8378 | 434.5552 | 1301.651 | 2.09  | 0.00091  | 39.99739 |
| P02647 | 0 | 1      | 434.5546 | 1301.649 | 0.61  | 0.00026  | 26.91794 |
| P02647 | 1 | 1      | 537.9702 | 1611.896 | 1.62  | 0.00087  | 6.36654  |
| P02647 | 0 | 1      | 482.5897 | 1445.754 | 2.71  | 0.00131  | 54.06726 |
| P02647 | 0 | 0.7576 | 741.0509 | 2221.138 | 0.11  | 0.00008  | 5.77091  |
| P02647 | 0 | 0.7647 | 509.2763 | 1017.545 | 0.73  | 0.00037  | 2.806286 |
| P02647 | 0 | 0.7576 | 634.3372 | 1900.997 | 3.93  | 0.00249  | 31.43967 |
| P02647 | 0 | 0.9189 | 514.2795 | 1540.824 | -0.69 | -0.00036 | 11.11472 |
| P02647 | 0 | 0.7021 | 509.2766 | 1017.546 | 1.45  | 0.00074  | 28.26963 |
| P02647 | 0 | 0.8571 | 634.3365 | 1900.995 | 2.87  | 0.00182  | 4.425326 |
| P02647 | 1 | 1      | 552.7991 | 2208.174 | 4.66  | 0.00257  | 23.11695 |
| P02647 | 0 | 0.9286 | 741.0516 | 2221.14  | 1.1   | 0.00082  | 11.00991 |
| P02647 | 0 | 0.75   | 714.3409 | 1427.674 | -0.05 | -0.00004 | 3.121211 |
| P02647 | 0 | 1      | 698.8661 | 1396.725 | 1.44  | 0.001    | 19.86818 |
| P02647 | 1 | 0.9167 | 433.234  | 1729.914 | 2.18  | 0.00094  | 9.524178 |
| P02647 | 0 | 0.7647 | 509.2764 | 1017.545 | 0.91  | 0.00046  | 3.059817 |
| P02647 | 0 | 0.5926 | 714.3422 | 1427.677 | 1.74  | 0.00124  | 31.96611 |
| P02647 | 0 | 0.9474 | 434.2661 | 1300.784 | 0.84  | 0.00036  | 55.02639 |
| P02647 | 1 | 1      | 528.9883 | 1584.95  | 4.5   | 0.00238  | 8.280834 |
| P02647 | 0 | 0.7297 | 563.6312 | 1688.879 | 3.41  | 0.00192  | 23.63972 |
| P02647 | 0 | 0.7059 | 509.2762 | 1017.545 | 0.49  | 0.00025  | 3.314902 |
| P02647 | 0 | 0.7442 | 509.2765 | 1017.546 | 1.09  | 0.00055  | 8.107929 |
| P02647 | 0 | 0.9756 | 514.2791 | 1540.823 | -1.41 | -0.00072 | 0        |
| P02647 | 0 | 0.7297 | 508.6368 | 1523.896 | 2.34  | 0.00119  | 9.470936 |
| P02647 | 0 | 0.9474 | 651.3291 | 1301.651 | 1.91  | 0.00124  | 12.9716  |
| P02647 | 0 | 1      | 723.3796 | 1445.752 | 0.95  | 0.00069  | 16.16673 |
| P02647 | 0 | 0.963  | 514.2828 | 1540.834 | 5.84  | 0.003    | 51.7985  |
| P02647 | 0 | 0.7778 | 509.2769 | 1017.546 | 1.87  | 0.00095  | 5.294312 |
| P02647 | 0 | 1      | 482.5905 | 1445.757 | 4.42  | 0.00213  | 59.87727 |
| P02647 | 0 | 0.913  | 588.3153 | 1175.623 | 1.93  | 0.00113  | 4.639504 |
| P02647 | 0 | 0.55   | 509.2759 | 1017.544 | -0.05 | -0.00003 | 0        |

|        |   |        |          |          |       |          |          |
|--------|---|--------|----------|----------|-------|----------|----------|
| P02647 | 1 | 0.7778 | 504.7897 | 1008.572 | 2.43  | 0.00123  | 27.79346 |
| P02647 | 0 | 0.2083 | 395.5682 | 1184.69  | 2.05  | 0.00081  | 10.88983 |
| P02647 | 0 | 0.7674 | 772.8929 | 1544.778 | 4.66  | 0.0036   | 9.914625 |
| P02647 | 2 | 0.037  | 467.7679 | 1868.05  | 1.5   | 0.0007   | 5.348342 |
| P02647 | 1 | 1      | 433.2335 | 1729.912 | 1.19  | 0.00052  | 16.82448 |
| P02647 | 0 | 0.4286 | 592.8486 | 1184.69  | 1.9   | 0.00113  | 4.501509 |
| P02647 | 0 | 0.88   | 741.0529 | 2221.144 | 2.83  | 0.0021   | 16.25623 |
| P02647 | 0 | 0.5    | 508.6364 | 1523.895 | 1.5   | 0.00076  | 4.924573 |
| P02647 | 0 | 0.88   | 741.0513 | 2221.139 | 0.61  | 0.00045  | 15.99097 |
| P02647 | 0 | 0.5161 | 693.0189 | 2077.042 | 2.98  | 0.00206  | 0        |
| P02647 | 0 | 0.675  | 509.2759 | 1017.545 | 0.07  | 0.00003  | 0        |
| P02647 | 0 | 1      | 651.3285 | 1301.65  | 0.97  | 0.00063  | 0.116527 |
| P02647 | 0 | 0.8182 | 634.3353 | 1900.991 | 0.94  | 0.0006   | 36.89429 |
| P02647 | 0 | 0.62   | 560.3256 | 1119.644 | 3.5   | 0.00196  | 0        |
| P02647 | 0 | 0.9355 | 434.5542 | 1301.648 | -0.3  | -0.00013 | 0        |
| P02647 | 0 | 0.9714 | 482.589  | 1445.753 | 1.39  | 0.00067  | 4.37337  |
| P02647 | 0 | 1      | 651.6281 | 1952.87  | 1.2   | 0.00078  | 4.442463 |
| P02647 | 0 | 1      | 651.3284 | 1301.65  | 0.88  | 0.00057  | 0        |
| P02647 | 0 | 0.3333 | 714.342  | 1427.677 | 1.57  | 0.00112  | 22.07319 |
| P02647 | 1 | 0.8    | 482.6171 | 1445.837 | 3.66  | 0.00177  | 5.811739 |
| P02647 | 1 | 1      | 850.4404 | 1699.873 | 1.1   | 0.00094  | 6.32115  |
| P02647 | 0 | 0.62   | 560.3231 | 1119.639 | -0.97 | -0.00055 | 0        |
| P02647 | 1 | 0.1    | 480.9522 | 1440.842 | 0.62  | 0.0003   | 0        |
| P02647 | 0 | 1      | 516.2639 | 1031.521 | 1.5   | 0.00077  | 15.98257 |
| P02647 | 0 | 0.8462 | 563.6308 | 1688.878 | 2.65  | 0.00149  | 28.57557 |
| P02647 | 0 | 0.4103 | 560.3253 | 1119.643 | 2.95  | 0.00165  | 23.7137  |
| P02647 | 1 | 1      | 567.2966 | 1699.875 | 2.21  | 0.00125  | 25.82204 |
| P02647 | 0 | 0.9483 | 524.2617 | 1047.516 | 2.14  | 0.00112  | 4.240848 |
| P02647 | 0 | 1      | 650.2884 | 1299.57  | 1.61  | 0.00105  | 0        |
| P02647 | 0 | 0.5172 | 476.0033 | 1900.991 | 0.94  | 0.00044  | 0        |
| P02647 | 0 | 0.8889 | 558.9789 | 1674.922 | 1.7   | 0.00095  | 31.90879 |
| P02647 | 1 | 1      | 482.9216 | 1446.75  | 0.84  | 0.00041  | 7.203422 |
| P02647 | 0 | 0.8    | 741.0512 | 2221.139 | 0.44  | 0.00033  | 22.16891 |
| P02647 | 0 | 0.8611 | 434.5548 | 1301.65  | 1.03  | 0.00045  | 8.633673 |
| P02647 | 1 | 0.3871 | 434.582  | 1301.731 | 1.52  | 0.00066  | 36.35732 |
| P02647 | 0 | 0.9375 | 741.0525 | 2221.143 | 2.25  | 0.00167  | 0        |
| P02647 | 0 | 1      | 434.2675 | 1300.788 | 4.08  | 0.00177  | 5.041448 |
| P02647 | 0 | 0.7955 | 722.3394 | 1443.671 | 1.36  | 0.00098  | 4.369184 |
| P02647 | 0 | 0.8529 | 556.0423 | 2221.147 | 4.25  | 0.00236  | 3.510854 |
| P02647 | 0 | 0.5714 | 634.3378 | 1900.999 | 4.99  | 0.00316  | 31.1857  |
| P02647 | 0 | 0.3273 | 520.7971 | 1040.587 | 1.12  | 0.00058  | 29.46955 |
| P02647 | 0 | 0.8    | 651.3291 | 1301.651 | 1.91  | 0.00124  | 0        |
| P02647 | 0 | 0.375  | 395.5681 | 1184.69  | 1.66  | 0.00066  | 12.4829  |
| P02647 | 0 | 0.95   | 376.7126 | 1503.828 | 1.8   | 0.00068  | 24.14646 |
| P02647 | 0 | 1      | 482.5894 | 1445.754 | 2.21  | 0.00106  | 16.78702 |
| P02647 | 0 | 0.7222 | 488.2736 | 975.5398 | 1.9   | 0.00093  | 0        |
| P02647 | 0 | 0.4828 | 476.5635 | 1427.676 | 0.92  | 0.00044  | 0        |
| P02647 | 1 | 0.8125 | 567.2976 | 1699.878 | 3.82  | 0.00217  | 11.03061 |
| P02647 | 0 | 0.5806 | 563.6309 | 1688.878 | 2.76  | 0.00155  | 24.55579 |
| P02647 | 0 | 0.4524 | 592.8482 | 1184.689 | 1.18  | 0.0007   | 6.240132 |
| P02647 | 0 | 0.8333 | 1111.074 | 2221.14  | 1.13  | 0.00126  | 0        |
| P02647 | 0 | 0.8056 | 693.02   | 2077.045 | 4.56  | 0.00316  | 9.656229 |

|        |   |        |          |          |       |          |          |
|--------|---|--------|----------|----------|-------|----------|----------|
| P02647 | 0 | 0.6071 | 563.6296 | 1688.874 | 0.59  | 0.00033  | 24.9904  |
| P02647 | 0 | 0.5    | 395.5681 | 1184.69  | 1.74  | 0.00069  | 10.1567  |
| P02647 | 0 | 0.9667 | 770.9175 | 1540.828 | 1.85  | 0.00143  | 5.913793 |
| P02647 | 0 | 0.5    | 395.5681 | 1184.69  | 1.74  | 0.00069  | 10.96507 |
| P02647 | 0 | 1      | 482.5887 | 1445.752 | 0.69  | 0.00033  | 81.23305 |
| P02647 | 0 | 0.5405 | 509.2768 | 1017.546 | 1.75  | 0.00089  | 4.994334 |
| P02647 | 0 | 0.4286 | 395.5681 | 1184.69  | 1.58  | 0.00063  | 46.72958 |
| P02647 | 0 | 0.3333 | 395.5683 | 1184.69  | 2.2   | 0.00087  | 21.51325 |
| P02647 | 0 | 0.8125 | 558.9797 | 1674.924 | 3.12  | 0.00174  | 56.40453 |
| P02647 | 0 | 0.8824 | 1039.023 | 2077.039 | 1.69  | 0.00175  | 0        |
| P02647 | 0 | 0.7083 | 634.3356 | 1900.992 | 1.42  | 0.0009   | 3.769731 |
| P02647 | 0 | 0.7188 | 634.3357 | 1900.993 | 1.62  | 0.00102  | 20.47313 |
| P02647 | 0 | 0.7547 | 488.2733 | 975.5394 | 1.4   | 0.00068  | 5.154588 |
| P02647 | 0 | 0.65   | 453.9138 | 1359.727 | 2.28  | 0.00103  | 7.844263 |
| P02647 | 0 | 0.5238 | 634.3355 | 1900.992 | 1.33  | 0.00084  | 4.862034 |
| P02647 | 0 | 1      | 687.9103 | 1374.813 | 1.52  | 0.00104  | 26.27832 |
| P02647 | 0 | 1      | 514.278  | 1540.819 | -3.66 | -0.00188 | 19.47607 |
| P02647 | 1 | 0.8056 | 598.9979 | 1794.979 | 4.04  | 0.00242  | 61.71779 |
| P02647 | 0 | 0.9062 | 690.3992 | 1379.791 | 0.68  | 0.00047  | 28.98508 |
| P02647 | 1 | 0.6522 | 572.629  | 1715.872 | 3.41  | 0.00195  | 30.91411 |
| P02647 | 0 | 0.2727 | 634.3365 | 1900.995 | 2.87  | 0.00182  | 6.061941 |
| P02647 | 0 | 0.2941 | 395.5678 | 1184.689 | 1.04  | 0.00041  | 26.10808 |
| P02647 | 0 | 1      | 514.2777 | 1540.819 | -4.14 | -0.00213 | 32.12918 |
| P02647 | 0 | 0.7059 | 509.2764 | 1017.546 | 0.97  | 0.00049  | 42.57995 |
| P02647 | 0 | 0.3056 | 510.9447 | 1530.819 | 1.49  | 0.00076  | 0        |
| P02647 | 0 | 0.7381 | 509.277  | 1017.547 | 2.17  | 0.0011   | 29.90212 |
| P02647 | 1 | 1      | 397.2089 | 1585.814 | 3.54  | 0.0014   | 6.875036 |
| P02647 | 0 | 0.9524 | 434.2675 | 1300.788 | 3.93  | 0.00171  | 26.37    |
| P02647 | 0 | 0.6346 | 437.2251 | 873.4429 | 0.44  | 0.00019  | 9.852448 |
| P02647 | 0 | 0.7368 | 634.3366 | 1900.995 | 2.96  | 0.00188  | 40.59726 |
| P02647 | 0 | 0.6444 | 509.2762 | 1017.545 | 0.55  | 0.00028  | 2.88381  |
| P02647 | 0 | 0.8611 | 634.332  | 1900.981 | -4.26 | -0.0027  | 0        |
| P02647 | 1 | 1      | 396.9921 | 1584.946 | 1.95  | 0.00077  | 48.15558 |
| P02647 | 0 | 1      | 434.5547 | 1301.649 | 0.75  | 0.00033  | 41.53929 |
| P02647 | 0 | 0.875  | 434.5553 | 1301.651 | 2.3   | 0.001    | 50.04819 |
| P02647 | 1 | 1      | 482.6156 | 1445.832 | 0.5   | 0.00024  | 8.608278 |
| P02647 | 0 | 0.7778 | 556.0409 | 2221.142 | 1.73  | 0.00096  | 5.272471 |
| P02647 | 0 | 0.4231 | 693.0183 | 2077.04  | 2.09  | 0.00145  | 6.289457 |
| P02647 | 0 | 0.92   | 563.6298 | 1688.875 | 0.81  | 0.00046  | 18.39999 |
| P02647 | 0 | 0.3784 | 592.8486 | 1184.69  | 1.8   | 0.00107  | 10.95143 |
| P02647 | 0 | 0.875  | 563.6303 | 1688.876 | 1.68  | 0.00094  | 26.71309 |
| P02647 | 0 | 0.7368 | 434.2674 | 1300.788 | 3.86  | 0.00168  | 5.074654 |
| P02647 | 0 | 0.5962 | 437.2254 | 873.4436 | 1.28  | 0.00056  | 15.28374 |
| P02647 | 0 | 0.8621 | 514.2804 | 1540.827 | 1.09  | 0.00056  | 12.7544  |
| P02647 | 0 | 0.3611 | 592.8494 | 1184.691 | 3.14  | 0.00186  | 9.508512 |
| P02647 | 0 | 0.3571 | 592.8489 | 1184.69  | 2.32  | 0.00137  | 6.619897 |
| P02647 | 1 | 0.6429 | 567.2987 | 1699.882 | 5.87  | 0.00333  | 0        |
| P02647 | 0 | 0.9286 | 687.911  | 1374.815 | 2.41  | 0.00165  | 47.39672 |
| P02647 | 1 | 0.931  | 480.9526 | 1440.843 | 1.38  | 0.00066  | 6.461298 |
| P02647 | 1 | 0.931  | 480.9526 | 1440.843 | 1.38  | 0.00066  | 6.461298 |
| P02647 | 0 | 0.9722 | 588.3162 | 1175.625 | 3.38  | 0.00199  | 17.43835 |
| P02647 | 0 | 1      | 514.281  | 1540.828 | 2.28  | 0.00117  | 28.74172 |



|        |   |        |          |          |       |          |          |
|--------|---|--------|----------|----------|-------|----------|----------|
| P02647 | 0 | 0.6842 | 560.3248 | 1119.642 | 2.08  | 0.00116  | 27.27049 |
| P02647 | 1 | 0.675  | 584.3588 | 1751.062 | 3.46  | 0.00202  | 11.80095 |
| P02647 | 1 | 0.675  | 584.3588 | 1751.062 | 3.46  | 0.00202  | 11.80095 |
| P02647 | 0 | 0.75   | 488.2731 | 975.539  | 1.02  | 0.0005   | 0        |
| P02647 | 1 | 0.875  | 455.2765 | 1363.815 | -0.56 | -0.00025 | 70.0079  |
| P02647 | 0 | 0.88   | 434.5542 | 1301.648 | -0.37 | -0.00016 | 34.28686 |
| P02647 | 0 | 0.913  | 563.6314 | 1688.88  | 3.74  | 0.0021   | 74.66186 |
| P02647 | 0 | 0.7368 | 506.9764 | 1518.914 | 0.74  | 0.00037  | 19.22167 |
| P02647 | 0 | 0.9677 | 651.3289 | 1301.65  | 1.53  | 0.001    | 4.821892 |
| P02647 | 0 | 0.9655 | 770.9158 | 1540.824 | -0.37 | -0.00028 | 0        |
| P02647 | 0 | 0.8696 | 558.9796 | 1674.924 | 2.9   | 0.00162  | 5.813317 |
| P02647 | 1 | 0.6087 | 580.6597 | 1739.964 | 4.26  | 0.00247  | 19.83234 |
| P02647 | 1 | 0.6087 | 580.6597 | 1739.964 | 4.26  | 0.00247  | 19.83234 |
| P02647 | 0 | 0.5    | 510.9447 | 1530.819 | 1.49  | 0.00076  | 6.291279 |
| P02647 | 0 | 0.44   | 395.568  | 1184.69  | 1.51  | 0.00059  | 14.63811 |
| P02647 | 0 | 0.8333 | 563.6303 | 1688.876 | 1.79  | 0.00101  | 62.86998 |
| P02647 | 1 | 1      | 396.9924 | 1584.948 | 2.72  | 0.00108  | 33.51994 |
| P02647 | 0 | 0.2    | 506.9763 | 1518.914 | 0.62  | 0.00031  | 0        |
| P02647 | 0 | 0.8696 | 460.602  | 1379.791 | 0.78  | 0.00036  | 23.63401 |
| P02647 | 0 | 0.6486 | 560.3249 | 1119.643 | 2.19  | 0.00122  | 0        |
| P02647 | 0 | 0.8333 | 563.6289 | 1688.872 | -0.82 | -0.00046 | 53.00072 |
| P02647 | 0 | 0.4167 | 395.5674 | 1184.688 | -0.19 | -0.00008 | 9.05993  |
| P02647 | 0 | 0.8846 | 878.9481 | 1756.889 | 0.83  | 0.00073  | 6.310212 |
| P02647 | 1 | 0.8919 | 651.37   | 1301.733 | 2.57  | 0.00167  | 0        |
| P02647 | 0 | 1      | 698.8657 | 1396.724 | 0.91  | 0.00064  | 0        |
| P02647 | 0 | 0.64   | 693.0196 | 2077.044 | 4.03  | 0.00279  | 39.19797 |
| P02647 | 0 | 1      | 765.9137 | 1530.82  | 1.91  | 0.00146  | 66.56273 |
| P02647 | 1 | 1      | 396.9915 | 1584.944 | 0.57  | 0.00022  | 58.12054 |
| P02647 | 0 | 0.7241 | 509.2775 | 1017.548 | 3.19  | 0.00162  | 34.92838 |
| P02647 | 0 | 0.9583 | 563.6306 | 1688.877 | 2.33  | 0.00131  | 19.33183 |
| P02647 | 0 | 0.3529 | 395.5677 | 1184.688 | 0.58  | 0.00023  | 25.77604 |
| P02647 | 0 | 0.8696 | 514.2807 | 1540.828 | 1.68  | 0.00086  | 3.271445 |
| P02647 | 0 | 0.3333 | 592.8487 | 1184.69  | 2.01  | 0.00119  | 5.456939 |
| P02647 | 0 | 0.913  | 951.0015 | 1900.996 | 3.26  | 0.0031   | 14.06745 |
| P02647 | 0 | 1      | 563.6306 | 1688.877 | 2.22  | 0.00125  | 9.606052 |
| P02647 | 2 | 1      | 470.4506 | 2348.224 | 0.81  | 0.00038  | 48.11077 |
| P02647 | 1 | 0.9643 | 528.9871 | 1584.947 | 2.08  | 0.0011   | 4.057369 |
| P02647 | 0 | 1      | 516.2635 | 1031.52  | 0.67  | 0.00035  | 0        |
| P02647 | 1 | 1      | 567.2963 | 1699.874 | 1.67  | 0.00095  |          |
| P02647 | 0 | 0.9583 | 770.9184 | 1540.83  | 2.96  | 0.00228  | 4.30398  |
| P02647 | 0 | 0.7059 | 741.0516 | 2221.14  | 1.02  | 0.00075  | 8.490401 |
| P02647 | 0 | 0.9375 | 386.2326 | 1156.683 | 2.35  | 0.00091  | 6.323419 |
| P02647 | 0 | 0.9375 | 386.2326 | 1156.683 | 2.35  | 0.00091  | 6.323419 |
| P02647 | 0 | 0.8824 | 488.2726 | 975.538  | -0.04 | -0.00002 | 13.75586 |
| P02647 | 0 | 0.6481 | 488.2736 | 975.5399 | 1.96  | 0.00096  | 4.857963 |
| P02647 | 0 | 1      | 687.91   | 1374.813 | 1.08  | 0.00074  | 0        |
| P02647 | 0 | 0.9286 | 651.3291 | 1301.651 | 1.91  | 0.00124  | 0        |
| P02647 | 0 | 0.35   | 592.8496 | 1184.692 | 3.45  | 0.00204  | 13.72029 |
| P02647 | 0 | 0.625  | 772.8914 | 1544.775 | 2.68  | 0.00207  | 6.276814 |
| P02647 | 0 | 1      | 770.9172 | 1540.827 | 1.45  | 0.00112  | 4.724904 |
| P02647 | 0 | 0.9259 | 651.3273 | 1301.647 | -0.9  | -0.00059 | 38.92931 |
| P02647 | 0 | 1      | 453.9136 | 1359.726 | 2.01  | 0.00091  | 19.52173 |

|        |   |        |          |          |       |          |          |
|--------|---|--------|----------|----------|-------|----------|----------|
| P02647 | 0 | 0.9565 | 844.9372 | 1688.867 | -3.7  | -0.00312 | 5.385182 |
| P02647 | 0 | 1      | 434.2658 | 1300.783 | -0.01 | 0        | 20.01415 |
| P02647 | 0 | 0.7222 | 741.0521 | 2221.142 | 1.76  | 0.0013   | 5.857788 |
| P02647 | 0 | 0.625  | 524.9986 | 2096.973 | 1.46  | 0.00076  | 21.56983 |
| P02647 | 0 | 0.6452 | 509.2768 | 1017.546 | 1.69  | 0.00086  | 0        |
| P02647 | 0 |        | 510.9445 | 1530.819 | 1.07  | 0.00054  | 3.128819 |
| P02647 | 0 | 1      | 651.3303 | 1301.653 | 3.69  | 0.0024   | 21.20005 |
| P02647 | 0 | 1      | 481.8956 | 1443.672 | 1.85  | 0.00089  | 0        |
| P02647 | 0 | 0.9565 | 651.329  | 1301.651 | 1.82  | 0.00118  | 0        |
| P02647 | 0 | 0.34   | 520.7971 | 1040.587 | 1.12  | 0.00058  | 4.498678 |
| P02647 | 0 | 1      | 524.9981 | 2096.971 | 0.53  | 0.00028  | 57.62544 |
| P02774 | 1 | 0.6111 | 490.9566 | 1470.855 | 0.24  | 0.00012  | 0        |
| P02774 | 1 | 1      | 538.9914 | 1614.96  | 1.65  | 0.00089  | 31.65588 |
| P02774 | 1 | 0.8108 | 538.9918 | 1614.961 | 2.33  | 0.00125  | 13.57051 |
| P02774 | 1 | 0.8108 | 490.9571 | 1470.857 | 1.23  | 0.0006   | 20.95879 |
| P02774 | 0 | 0.8085 | 627.8627 | 1254.718 | 1.28  | 0.0008   | 0        |
| P02774 | 0 | 1      | 466.945  | 1398.82  | 1.26  | 0.00059  | 31.71915 |
| P02774 | 0 | 0.9556 | 486.9576 | 1458.858 | 1.72  | 0.00084  | 14.30832 |
| P02774 | 0 | 1      | 466.9454 | 1398.822 | 2.18  | 0.00101  | 4.3955   |
| P02774 | 0 | 1      | 521.9294 | 1563.774 | 1.43  | 0.00075  | 4.900436 |
| P02774 | 1 | 0.9348 | 500.3008 | 1498.888 | 2.53  | 0.00126  | 8.855756 |
| P02774 | 0 | 1      | 951.1099 | 2851.315 | 1.35  | 0.00128  | 0        |
| P02774 | 0 | 1      | 951.1103 | 2851.316 | 1.74  | 0.00165  | 1.909381 |
| P02774 | 0 | 1      | 820.8726 | 3280.468 | -0.07 | -0.00006 | 0        |
| P02774 | 0 | 1      | 1094.164 | 3280.476 | 2.3   | 0.00251  | 2.736547 |
| P02774 | 0 | 1      | 647.3232 | 1293.639 | 3.38  | 0.00219  | 0        |
| P02774 | 0 | 1      | 820.8735 | 3280.472 | 1.12  | 0.00092  | 3.000134 |
| P02774 | 0 | 1      | 1094.162 | 3280.473 | 1.18  | 0.00129  | 4.973901 |
| P02774 | 0 | 1      | 1094.163 | 3280.475 | 2.07  | 0.00227  | 3.167392 |
| P02774 | 0 | 1      | 1046.13  | 3136.374 | 2.37  | 0.00247  | 0        |
| P02774 | 0 | 1      | 820.8739 | 3280.474 | 1.57  | 0.00128  | 2.32485  |
| P02774 | 0 | 1      | 1094.163 | 3280.473 | 1.4   | 0.00153  | 4.092617 |
| P02774 | 0 | 1      | 820.8738 | 3280.473 | 1.42  | 0.00116  | 3.706261 |
| P02774 | 0 | 1      | 1094.162 | 3280.473 | 1.18  | 0.00129  | 3.366157 |
| P02774 | 0 | 1      | 820.8741 | 3280.475 | 1.79  | 0.00147  | 3.563561 |
| P02774 | 0 | 1      | 1094.161 | 3280.47  | 0.29  | 0.00031  | 0.371701 |
| P02774 | 0 | 1      | 951.112  | 2851.321 | 3.53  | 0.00336  | 2.176339 |
| P02774 | 0 | 1      | 1094.161 | 3280.469 | 0.06  | 0.00007  | 0        |
| P02774 | 0 | 1      | 1094.163 | 3280.476 | 2.18  | 0.00239  | 0        |
| P02774 | 0 | 1      | 903.0749 | 2707.21  | 0.3   | 0.00027  | 1.033127 |
| P02774 | 0 | 1      | 903.0756 | 2707.212 | 1.04  | 0.00094  | 3.303947 |
| P02774 | 0 | 1      | 903.0757 | 2707.213 | 1.25  | 0.00112  | 3.552674 |
| P02774 | 0 | 1      | 903.0756 | 2707.212 | 1.11  | 0.001    | 0.90396  |
| P02774 | 0 | 1      | 713.5844 | 2851.316 | 1.56  | 0.00111  | 17.41942 |
| P02774 | 0 | 1      | 903.0754 | 2707.212 | 0.91  | 0.00082  | 8.398432 |
| P02774 | 0 | 1      | 951.1096 | 2851.314 | 1.03  | 0.00098  | 2.100888 |
| P02774 | 0 | 1      | 713.5841 | 2851.315 | 1.13  | 0.00081  | 3.630751 |
| P02774 | 0 | 1      | 951.1101 | 2851.316 | 1.48  | 0.00141  | 2.136817 |
| P02774 | 0 | 0.9524 | 1094.165 | 3280.481 | 3.63  | 0.00397  | 0        |
| P02774 | 0 | 0.9556 | 1094.16  | 3280.465 | -1.17 | -0.00127 | 0        |
| P02774 | 0 | 0.9722 | 1094.162 | 3280.473 | 1.18  | 0.00129  | 0        |
| P02774 | 0 | 1      | 713.5848 | 2851.318 | 2.16  | 0.00154  | 1.929952 |

|        |   |        |          |          |       |          |          |
|--------|---|--------|----------|----------|-------|----------|----------|
| P02774 | 0 | 1      | 951.1091 | 2851.313 | 0.52  | 0.00049  | 2.119209 |
| P02774 | 0 | 0.9737 | 781.6965 | 2343.075 | 2.62  | 0.00205  | 4.922868 |
| P02774 | 0 | 1      | 781.6961 | 2343.074 | 2.07  | 0.00162  | 5.117416 |
| P02774 | 0 | 1      | 781.6963 | 2343.074 | 2.31  | 0.0018   | 6.954242 |
| P02774 | 0 | 1      | 713.5848 | 2851.318 | 2.16  | 0.00154  | 1.770994 |
| P02774 | 0 | 1      | 951.1096 | 2851.314 | 0.97  | 0.00092  | 2.142505 |
| P02774 | 0 | 1      | 951.109  | 2851.312 | 0.39  | 0.00037  | 7.917794 |
| P02774 | 0 | 0.9412 | 486.9577 | 1458.859 | 1.91  | 0.00093  | 24.18926 |
| P02774 | 0 | 1      | 466.9453 | 1398.821 | 1.91  | 0.00089  | 34.41379 |
| P02774 | 0 | 1      | 466.9449 | 1398.82  | 1.13  | 0.00053  | 3.145844 |
| P02774 | 0 | 1      | 466.9446 | 1398.819 | 0.41  | 0.00019  | 4.642865 |
| P02774 | 0 | 0.9531 | 699.9139 | 1398.821 | 1.49  | 0.00104  | 3.947916 |
| P02774 | 0 | 1      | 647.3221 | 1293.637 | 1.68  | 0.00109  | 0        |
| P02774 | 1 | 0.84   | 500.3007 | 1498.888 | 2.29  | 0.00114  | 12.94992 |
| P02774 | 1 | 0.9189 | 375.4781 | 1498.891 | 4.37  | 0.00164  | 4.137413 |
| P02774 | 1 | 0.9268 | 538.9918 | 1614.961 | 2.44  | 0.00131  | 7.952909 |
| P02774 | 1 | 0.6111 | 490.9569 | 1470.856 | 0.86  | 0.00042  | 6.215226 |
| P02774 | 1 | 0.9333 | 404.4956 | 1614.96  | 2.17  | 0.00087  | 13.29116 |
| P02774 | 1 | 1      | 538.9916 | 1614.96  | 1.99  | 0.00107  | 11.30998 |
| P02774 | 1 | 0.5667 | 490.9565 | 1470.855 | -0.01 | -0.00001 | 14.19141 |
| P02774 | 1 | 0.9783 | 538.9915 | 1614.96  | 1.87  | 0.00101  | 16.08534 |
| P02774 | 1 | 1      | 538.9911 | 1614.959 | 1.08  | 0.00058  | 7.951202 |
| P02774 | 1 | 0.9412 | 490.9571 | 1470.857 | 1.23  | 0.0006   | 7.538885 |
| P02774 | 1 | 0.9394 | 490.9569 | 1470.856 | 0.8   | 0.00039  | 13.20278 |
| P02774 | 1 | 0.8649 | 404.4957 | 1614.961 | 2.47  | 0.001    | 10.94688 |
| P02774 | 0 | 0.973  | 438.9237 | 1314.757 | 2.1   | 0.00092  | 0        |
| P02774 | 0 | 0.6032 | 547.8181 | 1094.629 | -1.45 | -0.00079 | 58.00685 |
| P02774 | 1 | 1      | 538.9923 | 1614.962 | 3.35  | 0.0018   | 19.00097 |
| P02774 | 1 | 0.9565 | 538.9913 | 1614.959 | 1.53  | 0.00082  | 50.19981 |
| P02774 | 0 | 0.975  | 486.9581 | 1458.86  | 2.66  | 0.00129  | 6.638851 |
| P02774 | 0 | 0.9787 | 486.9569 | 1458.856 | 0.21  | 0.0001   | 10.29313 |
| P02774 | 0 | 0.8333 | 729.933  | 1458.859 | 1.94  | 0.00141  | 6.351958 |
| P02774 | 0 | 0.9744 | 486.9584 | 1458.861 | 3.29  | 0.0016   | 21.30447 |
| P02774 | 0 | 0.9722 | 486.958  | 1458.86  | 2.54  | 0.00123  | 17.04759 |
| P02774 | 0 | 0.7857 | 729.9333 | 1458.859 | 2.36  | 0.00172  | 5.432534 |
| P02774 | 0 | 0.963  | 486.9574 | 1458.858 | 1.22  | 0.00059  | 8.799095 |
| P02774 | 0 | 0.9701 | 837.4489 | 1673.891 | 2.32  | 0.00194  | 12.35677 |
| P02774 | 1 | 0.8085 | 456.2815 | 1366.83  | 1.88  | 0.00086  | 13.72063 |
| P02774 | 1 | 0.9302 | 456.2805 | 1366.827 | -0.33 | -0.00015 | 11.19941 |
| P02774 | 0 | 1      | 558.6353 | 1673.891 | 2.72  | 0.00152  | 8.994144 |
| P02774 | 0 | 0.9848 | 837.4484 | 1673.89  | 1.74  | 0.00146  | 4.286998 |
| P02774 | 1 | 0.9091 | 532.5604 | 2127.22  | 1.05  | 0.00056  | 37.95059 |
| P02774 | 1 | 0.9375 | 709.7456 | 2127.222 | 2.29  | 0.00163  | 11.30849 |
| P02774 | 0 | 0.9516 | 837.4638 | 2510.377 | 1.87  | 0.00157  | 10.14027 |
| P02774 | 0 | 1      | 1327.742 | 2654.478 | 1.27  | 0.00168  | 0        |
| P02774 | 1 | 0.6111 | 490.9574 | 1470.858 | 1.79  | 0.00088  | 11.71552 |
| P02774 | 0 | 1      | 710.3397 | 1419.672 | 1.81  | 0.00128  | 0        |
| P02774 | 0 | 0.9565 | 486.9576 | 1458.858 | 1.72  | 0.00084  | 9.88282  |
| P02774 | 0 | 1      | 794.3482 | 2381.03  | 0.13  | 0.0001   | 3.922425 |
| P02774 | 0 | 1      | 1191.021 | 2381.034 | 1.88  | 0.00223  | 0.430304 |
| P02774 | 0 | 1      | 794.3496 | 2381.034 | 1.82  | 0.00144  | 3.735266 |
| P02774 | 0 | 1      | 596.0147 | 2381.037 | 3.05  | 0.00181  | 3.678235 |

|            |   |        |          |          |       |          |          |
|------------|---|--------|----------|----------|-------|----------|----------|
| P02774     | 0 | 1      | 794.3492 | 2381.033 | 1.44  | 0.00114  | 10.76576 |
| P02774     | 0 | 1      | 794.3468 | 2381.026 | -1.64 | -0.0013  | 22.57772 |
| P02774     | 0 | 0.8491 | 619.0132 | 1855.025 | 2.5   | 0.00155  | 8.034148 |
| P02774     | 0 | 1      | 781.6954 | 2343.072 | 1.14  | 0.00089  | 4.302599 |
| P02774     | 0 | 1      | 1172.041 | 2343.075 | 2.39  | 0.0028   | 0.388275 |
| P02774     | 0 | 1      | 781.696  | 2343.073 | 1.92  | 0.0015   | 4.072446 |
| P02774     | 0 | 1      | 781.6957 | 2343.072 | 1.53  | 0.00119  | 3.675288 |
| P02774     | 0 | 1      | 781.6962 | 2343.074 | 2.15  | 0.00168  | 7.841246 |
| P02774     | 0 | 1      | 1172.041 | 2343.074 | 2.18  | 0.00256  | 0        |
| P02774     | 0 | 1      | 781.6957 | 2343.072 | 1.53  | 0.00119  | 4.446748 |
| P02774     | 0 | 1      | 781.6958 | 2343.073 | 1.68  | 0.00132  | 24.25493 |
| P02774     | 0 | 0.9815 | 781.696  | 2343.074 | 2     | 0.00156  | 56.30687 |
| P02774     | 0 | 1      | 781.6964 | 2343.075 | 2.39  | 0.00186  | 4.596306 |
| P02774     | 0 | 0.9783 | 781.695  | 2343.07  | 0.59  | 0.00046  | 7.870258 |
| P02774     | 0 | 0.9286 | 781.6952 | 2343.071 | 0.9   | 0.00071  | 11.2229  |
| P02774     | 0 | 1      | 888.0463 | 2662.124 | 2.13  | 0.00189  | 33.88107 |
| P02774     | 0 | 1      | 781.6964 | 2343.075 | 2.39  | 0.00186  | 9.46622  |
| P02774     | 0 | 1      | 888.0462 | 2662.124 | 2     | 0.00177  | 35.21415 |
| P02774     | 0 | 1      | 781.6962 | 2343.074 | 2.23  | 0.00174  | 4.246404 |
| P02774     | 1 | 0.9    | 654.8546 | 2616.396 | 2     | 0.0013   | 8.424417 |
| P02774     | 0 | 1      | 888.0451 | 2662.121 | 0.76  | 0.00067  | 2.272625 |
| P02774     | 0 | 1      | 1331.564 | 2662.12  | 0.63  | 0.00083  | 0        |
| P02774     | 0 | 1      | 888.0451 | 2662.121 | 0.76  | 0.00067  | 25.48631 |
| P02774     | 0 | 1      | 661.569  | 2643.254 | 0.44  | 0.00029  | 2.907697 |
| P02774     | 0 | 1      | 881.7516 | 2643.24  | -4.8  | -0.00423 | 6.772026 |
| P02774     | 0 | 0.8305 | 620.8623 | 1240.717 | 2.73  | 0.00169  | 5.274197 |
| P02774     | 0 | 0.9722 | 414.2438 | 1240.717 | 2.35  | 0.00097  | 10.40087 |
| P02774; Q8 | 0 | 0.7759 | 483.298  | 965.5887 | 1.77  | 0.00086  | 4.257823 |
| P02774     | 0 | 1      | 833.723  | 2499.155 | 1.47  | 0.00123  | 42.39676 |
| P02774     | 0 | 1      | 803.686  | 2409.044 | 1.9   | 0.00153  | 2.184384 |
| P02774     | 0 | 1      | 851.7206 | 2553.147 | 2.48  | 0.00211  | 6.023157 |
| P02774     | 0 | 1      | 803.6861 | 2409.044 | 1.98  | 0.00159  | 2.764059 |
| P02774     | 0 | 1      | 661.5695 | 2643.256 | 1.17  | 0.00078  | 3.03529  |
| P02774     | 0 | 1      | 881.7567 | 2643.255 | 0.95  | 0.00084  | 4.300338 |
| P02774     | 0 | 0.9756 | 521.9299 | 1563.775 | 2.37  | 0.00123  | 12.7579  |
| P02774     | 0 | 1      | 521.9298 | 1563.775 | 2.02  | 0.00105  | 0        |
| P02774     | 0 | 1      | 702.3131 | 1403.619 | 1.05  | 0.00074  | 3.290761 |
| P02774     | 1 | 1      | 532.5607 | 2127.221 | 1.63  | 0.00086  | 6.384738 |
| P02774     | 1 | 0.9512 | 709.7448 | 2127.22  | 1.09  | 0.00077  | 10.79277 |
| P02774     | 1 | 0.9412 | 661.7117 | 1983.121 | 2.68  | 0.00177  | 13.48796 |
| P02774     | 0 | 0.8    | 613.8485 | 1226.69  | 2.09  | 0.00128  | 5.952579 |
| P02774     | 0 | 0.8689 | 613.8498 | 1226.692 | 4.27  | 0.00262  | 16.57302 |
| P02774     | 1 | 0.8182 | 496.5348 | 1983.117 | 1.07  | 0.00053  | 3.301055 |
| P02774     | 1 | 0.8182 | 496.5348 | 1983.117 | 1.07  | 0.00053  | 3.301055 |
| P02774     | 1 | 0.9412 | 661.7117 | 1983.121 | 2.68  | 0.00177  | 13.48796 |
| P02774     | 1 | 1      | 532.5609 | 2127.222 | 1.97  | 0.00105  | 11.83925 |
| P02774     | 1 | 1      | 709.746  | 2127.224 | 2.9   | 0.00205  | 7.800463 |
| P02774     | 0 | 1      | 647.3232 | 1293.639 | 3.38  | 0.00219  | 13.51746 |
| P02774     | 0 | 1      | 873.6816 | 3491.705 | -0.69 | -0.00061 | 6.178287 |
| P02774     | 1 | 1      | 532.562  | 2127.226 | 4.04  | 0.00215  | 5.654046 |
| P02774     | 1 | 0.9556 | 709.7449 | 2127.22  | 1.35  | 0.00095  | 11.39899 |
| P02774     | 0 | 1      | 1195.938 | 3585.799 | 2.03  | 0.00242  | 3.758381 |

|            |   |        |          |          |       |          |          |
|------------|---|--------|----------|----------|-------|----------|----------|
| P02774     | 0 | 0.8219 | 613.8474 | 1226.687 | 0.29  | 0.00018  | 6.339625 |
| P02774     | 1 | 0.9298 | 661.7118 | 1983.121 | 2.77  | 0.00183  | 3.706608 |
| P02774     | 1 | 0.7442 | 709.7462 | 2127.224 | 3.07  | 0.00217  | 29.39446 |
| P02774     | 1 | 0.9298 | 661.7118 | 1983.121 | 2.77  | 0.00183  | 3.706608 |
| P02774     | 0 | 1      | 579.2388 | 1735.702 | 1.25  | 0.00072  | 9.909491 |
| P02774     | 0 | 0.8788 | 613.8489 | 1226.691 | 2.88  | 0.00177  | 20.09252 |
| P02774     | 0 | 1      | 579.2389 | 1735.702 | 1.35  | 0.00078  | 6.410325 |
| P02774     | 0 | 0.7541 | 619.8386 | 1238.67  | 3.68  | 0.00228  | 14.61842 |
| P02774     | 0 | 0.973  | 521.9299 | 1563.775 | 2.37  | 0.00123  | 47.46926 |
| P02774     | 0 | 1      | 639.0418 | 2553.145 | 1.61  | 0.00103  | 3.738093 |
| P02774     | 0 | 1      | 851.7194 | 2553.144 | 1.05  | 0.00089  | 3.829121 |
| P02774     | 0 | 1      | 851.7202 | 2553.146 | 1.98  | 0.00168  | 3.820195 |
| P02774     | 0 | 1      | 647.3219 | 1293.637 | 1.4   | 0.00091  | 6.620681 |
| P02774     | 0 | 1      | 782.3905 | 1563.774 | 1.4   | 0.00109  | 6.16034  |
| P02774     | 0 | 0.9565 | 521.9299 | 1563.775 | 2.37  | 0.00123  | 12.92054 |
| P02774     | 0 | 1      | 796.3024 | 1591.598 | -0.08 | -0.00006 | 18.70213 |
| P02774     | 0 | 0.9286 | 1046.127 | 3136.367 | 0.26  | 0.00028  | 11.95869 |
| P02774     | 1 | 0.8966 | 490.9575 | 1470.858 | 1.98  | 0.00097  | 37.11122 |
| P02774     | 1 | 1      | 500.3004 | 1498.887 | 1.67  | 0.00084  | 48.35133 |
| P02774     | 0 | 0.7692 | 414.2431 | 1240.715 | 0.58  | 0.00024  | 8.470369 |
| P02774     | 0 | 1      | 733.6619 | 2198.971 | 1.91  | 0.0014   | 2.425757 |
| P02774     | 0 | 1      | 466.9455 | 1398.822 | 2.44  | 0.00114  | 17.51867 |
| P02774     | 0 | 1      | 1094.162 | 3280.47  | 0.51  | 0.00056  | 0        |
| P02774     | 0 | 1      | 418.9112 | 1254.719 | 2.05  | 0.00086  | 6.323921 |
| P02774     | 0 | 1      | 466.9453 | 1398.821 | 1.98  | 0.00092  | 59.28594 |
| P02774; Q8 | 0 | 0.7759 | 483.2975 | 965.5876 | 0.7   | 0.00034  | 0        |
| P02774     | 0 | 1      | 702.3134 | 1403.619 | 1.49  | 0.00104  | 7.404727 |
| P02774; Q8 | 0 | 0.7538 | 483.2982 | 965.5892 | 2.28  | 0.0011   | 16.79695 |
| P02774     | 0 | 1      | 431.8839 | 1293.637 | 1.98  | 0.00085  | 45.01679 |
| P02774     | 0 | 0.8333 | 486.9577 | 1458.859 | 1.91  | 0.00093  | 63.07834 |
| P02774     | 0 | 0.8696 | 619.8381 | 1238.669 | 2.9   | 0.00179  | 51.15693 |
| P02774     | 0 | 1      | 1094.162 | 3280.47  | 0.51  | 0.00056  | 0        |
| P02774     | 0 | 0.807  | 547.7863 | 1094.565 | 1.95  | 0.00107  | 4.801783 |
| P02774     | 0 | 1      | 702.3138 | 1403.62  | 2.09  | 0.00147  | 0        |
| P02774     | 0 | 0.8837 | 657.8814 | 1314.756 | 1.33  | 0.00087  | 24.88596 |
| P02774     | 1 | 0.9    | 654.8553 | 2616.399 | 3.11  | 0.00204  | 9.704162 |
| P02774     | 0 | 1      | 820.8737 | 3280.473 | 1.27  | 0.00104  | 24.73855 |
| P02774     | 0 | 0.913  | 1094.16  | 3280.466 | -0.83 | -0.00091 | 0        |
| P02774     | 0 | 0.9706 | 431.884  | 1293.637 | 2.05  | 0.00088  | 8.056562 |
| P02774     | 0 | 0.7241 | 414.2438 | 1240.717 | 2.27  | 0.00094  | 15.98284 |
| P02774     | 0 | 0.807  | 547.7866 | 1094.566 | 2.4   | 0.00131  | 5.446554 |
| P02774     | 0 | 0.975  | 473.8958 | 1419.673 | 2.27  | 0.00108  | 0        |
| P02774     | 0 | 0.8333 | 619.8365 | 1238.666 | 0.33  | 0.00021  | 5.273166 |
| P02774     | 1 | 0.625  | 490.9571 | 1470.857 | 1.3   | 0.00064  | 47.86494 |
| P02774; Q8 | 0 | 0.7538 | 483.2995 | 965.5917 | 4.87  | 0.00235  | 0        |
| P02774     | 0 | 0.96   | 781.6963 | 2343.074 | 2.31  | 0.0018   | 0        |
| P02774     | 0 | 0.8103 | 547.7869 | 1094.566 | 2.95  | 0.00162  | 0        |
| P02774     | 0 | 1      | 702.3131 | 1403.619 | 1.05  | 0.00074  | 5.512931 |
| P02774     | 0 | 1      | 702.3127 | 1403.618 | 0.53  | 0.00037  | 5.977122 |
| P02774     | 0 | 0.9348 | 418.9108 | 1254.718 | 1.1   | 0.00046  | 5.872527 |
| P02774     | 0 | 0.9375 | 521.93   | 1563.775 | 2.48  | 0.0013   | 12.33831 |
| P02774     | 0 | 0.7949 | 547.8188 | 1094.63  | -0.11 | -0.00006 | 16.16144 |

|            |   |        |          |          |       |          |          |
|------------|---|--------|----------|----------|-------|----------|----------|
| P02774     | 0 | 0.9318 | 438.9238 | 1314.757 | 2.24  | 0.00098  | 6.194859 |
| P02774     | 1 | 1      | 458.2897 | 1372.855 | 1.64  | 0.00075  | 39.88477 |
| P02774     | 1 | 1      | 456.2831 | 1366.835 | 5.37  | 0.00245  | 45.50527 |
| P02774; Q8 | 0 | 0.7925 | 483.298  | 965.5887 | 1.84  | 0.00089  | 8.885428 |
| P02774     | 0 | 1      | 418.9107 | 1254.717 | 0.81  | 0.00034  | 34.32304 |
| P02774; Q8 | 0 | 0.6458 | 483.2982 | 965.589  | 2.15  | 0.00104  | 8.608858 |
| P02774     | 0 | 1      | 414.2435 | 1240.716 | 1.61  | 0.00067  | 25.7203  |
| P02774     | 0 | 0.8667 | 438.9234 | 1314.756 | 1.41  | 0.00062  | 2.630655 |
| P02774     | 0 | 0.9565 | 414.2441 | 1240.718 | 3.16  | 0.00131  | 17.4832  |
| P02774     | 0 | 1      | 1094.163 | 3280.474 | 1.51  | 0.00166  | 1.546012 |
| P02774     | 0 | 0.4286 | 544.3531 | 1087.699 | 2.2   | 0.0012   | 6.535117 |
| P02774     | 0 | 1      | 781.6972 | 2343.077 | 3.48  | 0.00272  | 13.21325 |
| P02774     | 1 | 0.9091 | 490.9569 | 1470.856 | 0.8   | 0.00039  | 22.97277 |
| P02774     | 0 | 0.6111 | 414.2429 | 1240.714 | 0.13  | 0.00006  | 37.24466 |
| P02774     | 1 | 0.95   | 404.4955 | 1614.96  | 1.86  | 0.00075  | 50.54002 |
| P02774     | 0 | 0.5758 | 619.0153 | 1855.031 | 5.95  | 0.00368  | 34.67757 |
| P02774     | 0 | 0.9524 | 781.6947 | 2343.07  | 0.28  | 0.00022  | 9.719802 |
| P02774     | 1 | 0.9032 | 375.4775 | 1498.888 | 2.83  | 0.00106  | 4.185336 |
| P02774     | 0 | 0.8444 | 619.8381 | 1238.669 | 2.9   | 0.00179  | 0        |
| P02774; Q8 | 0 | 0.7895 | 483.2989 | 965.5904 | 3.61  | 0.00174  | 11.10543 |
| P02774     | 1 | 0.7381 | 683.9185 | 1366.83  | 1.6   | 0.0011   | 9.03268  |
| P02774     | 0 | 1      | 794.3481 | 2381.03  | -0.03 | -0.00002 | 2.984292 |
| P02774     | 0 | 0.675  | 613.8497 | 1226.692 | 4.18  | 0.00256  | 12.94419 |
| P02774     | 0 | 1      | 888.0439 | 2662.117 | -0.62 | -0.00055 | 9.919293 |
| P02774     | 0 | 0.72   | 515.3135 | 1029.62  | 1.38  | 0.00071  | 29.11964 |
| P02774     | 0 | 1      | 702.3129 | 1403.619 | 0.88  | 0.00062  | 9.475031 |
| P02774     | 0 | 0.6667 | 414.2438 | 1240.717 | 2.42  | 0.001    | 15.24767 |
| P02774     | 0 | 0.9545 | 781.6936 | 2343.066 | -1.13 | -0.00088 | 0        |
| P02774     | 0 | 1      | 547.7875 | 1094.568 | 4.07  | 0.00223  | 10.71735 |
| P02774     | 0 | 1      | 888.0454 | 2662.122 | 1.1   | 0.00098  | 9.207657 |
| P02774     | 0 | 0.9615 | 486.959  | 1458.862 | 4.54  | 0.00221  | 26.85228 |
| P02774     | 0 | 0.7879 | 657.8819 | 1314.757 | 2.07  | 0.00136  | 0        |
| P02774     | 1 | 1      | 461.6135 | 1382.826 | 2.58  | 0.00119  | 31.08832 |
| P02774     | 2 | 1      | 520.5311 | 2079.102 | 0.35  | 0.00018  | 29.02924 |
| P02774     | 0 | 0.6333 | 443.2626 | 885.5179 | 1.96  | 0.00087  | 5.905873 |
| P02774     | 0 | 1      | 794.3483 | 2381.03  | 0.28  | 0.00022  | 21.06667 |
| P02774     | 0 | 0.8571 | 664.3753 | 2654.479 | 1.95  | 0.00129  | 12.76943 |
| P02774     | 0 | 0.8621 | 541.7972 | 1082.587 | 2.04  | 0.0011   | 2.869317 |
| P02774     | 0 | 0.7917 | 781.6955 | 2343.072 | 1.29  | 0.00101  | 5.975255 |
| P02774     | 0 | 0.9259 | 820.8743 | 3280.475 | 2.01  | 0.00165  | 0.922815 |
| P02774     | 0 | 0.8182 | 547.7864 | 1094.565 | 2.06  | 0.00113  | 19.53961 |
| P02774     | 1 | 1      | 461.613  | 1382.824 | 1.39  | 0.00064  | 37.62499 |
| P02774     | 1 | 1      | 500.302  | 1498.891 | 4.85  | 0.00242  | 60.25291 |
| P02774; Q8 | 0 | 0.7458 | 483.2989 | 965.5906 | 3.73  | 0.0018   | 31.37271 |
| P02774     | 0 | 1      | 888.0466 | 2662.125 | 2.41  | 0.00214  | 3.621063 |
| P02774; Q8 | 0 | 0.7903 | 411.2469 | 821.4866 | 2.03  | 0.00083  | 12.27218 |
| P02774     | 0 | 1      | 1191.012 | 2381.017 | -5.51 | -0.00655 | 28.76226 |
| P02774     | 1 | 0.641  | 408.247  | 1222.726 | 0.74  | 0.0003   | 27.74141 |
| P02774     | 1 | 0.641  | 408.247  | 1222.726 | 0.74  | 0.0003   | 27.74141 |
| P02774     | 0 | 0.9231 | 781.697  | 2343.077 | 3.25  | 0.00254  | 6.079325 |
| P02774     | 0 | 0.5    | 515.3143 | 1029.621 | 3.04  | 0.00156  | 12.08007 |
| P02774     | 0 | 0.7143 | 627.8645 | 1254.722 | 4.2   | 0.00263  | 39.11585 |

|            |   |        |          |          |       |          |          |
|------------|---|--------|----------|----------|-------|----------|----------|
| P02774     | 0 | 1      | 521.9294 | 1563.774 | 1.31  | 0.00068  | 71.29767 |
| P02774     | 0 | 0.9355 | 782.3889 | 1563.771 | -0.63 | -0.00049 | 0        |
| P02774     | 0 | 1      | 951.1054 | 2851.301 | -3.47 | -0.00329 | 25.64327 |
| P02774     | 0 | 1      | 868.3553 | 1735.703 | 2.03  | 0.00176  | 67.67986 |
| P02774     | 0 | 0.8571 | 409.5681 | 1226.69  | 2.22  | 0.00091  | 10.41526 |
| P02774     | 0 | 0.1538 | 544.353  | 1087.699 | 1.98  | 0.00107  | 31.47065 |
| P02774     | 0 | 1      | 820.8715 | 3280.464 | -1.34 | -0.0011  | 20.50096 |
| P02774     | 0 | 1      | 647.3211 | 1293.635 | 0.17  | 0.00011  | 0        |
| P02774; Q8 | 0 | 0.7538 | 483.2971 | 965.5869 | -0.06 | -0.00003 | 11.14255 |
| P02774     | 0 | 1      | 584.5713 | 1751.699 | 2.64  | 0.00154  | 48.57916 |
| P02774     | 1 | 1      | 461.6138 | 1382.827 | 3.25  | 0.0015   | 39.0444  |
| P02774     | 0 | 1      | 521.9285 | 1563.771 | -0.33 | -0.00017 | 26.97382 |
| P02774     | 0 | 0.1081 | 544.3529 | 1087.699 | 1.86  | 0.00101  | 23.89579 |
| P02774     | 1 | 0.88   | 532.5598 | 2127.217 | 0.02  | 0.00001  | 20.23253 |
| P02774     | 0 | 0.6667 | 414.2437 | 1240.716 | 1.98  | 0.00082  | 3.051709 |
| P02774     | 0 | 0.575  | 547.786  | 1094.565 | 1.39  | 0.00076  | 35.94297 |
| P02774     | 0 | 0.8667 | 547.7872 | 1094.567 | 3.51  | 0.00192  | 20.08314 |
| P02774     | 0 | 0.3871 | 613.8492 | 1226.691 | 3.38  | 0.00207  | 100      |
| P02774     | 0 | 0.5957 | 544.3535 | 1087.7   | 2.87  | 0.00156  | 6.748145 |
| P02774     | 1 | 0.72   | 709.746  | 2127.224 | 2.9   | 0.00205  | 7.030743 |
| P02774     | 0 | 1      | 414.2434 | 1240.716 | 1.32  | 0.00054  | 42.03664 |
| P02774     | 0 | 0.6667 | 547.7866 | 1094.566 | 2.4   | 0.00131  | 36.53055 |
| P02774     | 0 | 0.875  | 431.8833 | 1293.635 | 0.49  | 0.00021  | 45.89429 |
| P02774     | 1 | 0.6757 | 413.5793 | 1238.723 | 2.35  | 0.00097  | 32.35081 |
| P02774     | 1 | 0.6757 | 413.5793 | 1238.723 | 2.35  | 0.00097  | 32.35081 |
| P02774     | 0 | 0.8108 | 547.7855 | 1094.564 | 0.39  | 0.00021  | 74.05232 |
| P02774     | 0 | 1      | 466.9455 | 1398.822 | 2.37  | 0.00111  | 55.68572 |
| P02774     | 0 | 0.7778 | 885.498  | 2654.479 | 1.95  | 0.00173  | 39.33886 |
| P02774     | 0 | 1      | 888.0461 | 2662.124 | 1.86  | 0.00165  | 4.083715 |
| P02774     | 0 | 0.6897 | 438.9231 | 1314.755 | 0.64  | 0.00028  | 23.3421  |
| P02774     | 0 | 1      | 796.3022 | 1591.597 | -0.39 | -0.00031 | 35.72642 |
| P02774     | 0 | 0.8235 | 521.9302 | 1563.776 | 2.84  | 0.00148  | 55.44266 |
| P02774     | 0 | 0.7647 | 547.7863 | 1094.565 | 1.95  | 0.00107  | 46.06146 |
| P02774     | 0 | 1      | 468.5445 | 1403.619 | 1.19  | 0.00056  | 9.279737 |
| P02774     | 1 | 0.5714 | 490.9572 | 1470.857 | 1.36  | 0.00067  | 63.94419 |
| P02774     | 0 | 1      | 1094.163 | 3280.475 | 1.85  | 0.00202  | 0        |
| P02774     | 0 | 0.5882 | 466.946  | 1398.824 | 3.62  | 0.00169  | 42.94089 |
| P02774     | 1 | 1      | 456.2817 | 1366.83  | 2.22  | 0.00101  | 15.38469 |
| P02774     | 0 | 0.7692 | 781.6976 | 2343.078 | 3.95  | 0.00309  | 50.58721 |
| P02774; Q8 | 0 | 0.6809 | 411.2463 | 821.4853 | 0.54  | 0.00022  | 17.26967 |
| P02774     | 0 | 1      | 888.0488 | 2662.132 | 4.95  | 0.0044   | 5.255212 |
| P02774     | 0 | 1      | 466.9448 | 1398.82  | 1     | 0.00047  | 11.40425 |
| P02774     | 0 | 1      | 833.7229 | 2499.154 | 1.33  | 0.0011   | 12.72684 |
| P02774     | 0 | 0.825  | 547.7856 | 1094.564 | 0.61  | 0.00033  | 49.57756 |
| P02774     | 0 | 0.6154 | 820.8718 | 3280.465 | -0.96 | -0.00079 | 22.74736 |
| P02774     | 0 | 0.9286 | 547.8206 | 1094.634 | 3.23  | 0.00177  | 10.2222  |
| P02774     | 1 | 0.4375 | 749.9471 | 1498.887 | 1.95  | 0.00146  | 14.02988 |
| P02774     | 1 | 0.7778 | 532.5611 | 2127.223 | 2.43  | 0.00129  | 13.75479 |
| P02774     | 0 | 1      | 733.6621 | 2198.972 | 2.16  | 0.00158  | 0        |
| P02774     | 0 | 0.9286 | 438.9239 | 1314.757 | 2.59  | 0.00114  | 7.129221 |
| P02774     | 0 | 1      | 579.2374 | 1735.698 | -1.28 | -0.00074 | 20.40243 |
| P02774     | 0 | 1      | 468.5446 | 1403.619 | 1.39  | 0.00065  | 8.146728 |

|        |   |        |          |          |       |          |          |
|--------|---|--------|----------|----------|-------|----------|----------|
| P02774 | 0 | 0.7429 | 547.7871 | 1094.567 | 3.29  | 0.0018   | 15.91132 |
| P02774 | 0 | 1      | 888.0449 | 2662.12  | 0.55  | 0.00049  | 70.35582 |
| P06727 | 0 | 0.9492 | 680.3805 | 1359.754 | 0.17  | 0.00011  | 2.960161 |
| P06727 | 0 | 0.8723 | 453.9234 | 1359.756 | 1.53  | 0.00069  | 9.45674  |
| P06727 | 0 | 0.9508 | 680.3806 | 1359.754 | 0.26  | 0.00018  | 4.028257 |
| P06727 | 0 | 0.8571 | 453.9232 | 1359.755 | 1.06  | 0.00048  | 4.073812 |
| P06727 | 0 | 0.8235 | 508.632  | 1523.881 | 1.98  | 0.00101  | 6.12747  |
| P06727 | 0 | 0.971  | 644.3378 | 1287.668 | 2.51  | 0.00161  | 0        |
| P06727 | 0 | 0.6744 | 616.3438 | 1847.017 | 4.3   | 0.00265  | 37.90068 |
| P06727 | 0 | 1      | 485.9407 | 1455.808 | 0.02  | 0.00001  | 26.61226 |
| P06727 | 0 | 1      | 1227.941 | 3681.807 | 1.1   | 0.00135  | 1.713722 |
| P06727 | 0 | 1      | 921.2083 | 3681.811 | 2.11  | 0.00194  | 3.172803 |
| P06727 | 0 | 1      | 1233.274 | 3697.808 | 2.7   | 0.00333  | 0        |
| P06727 | 0 | 0.9048 | 508.6312 | 1523.879 | 0.48  | 0.00025  | 10.60894 |
| P06727 | 0 | 0.9556 | 508.6315 | 1523.88  | 1.02  | 0.00052  | 15.54411 |
| P06727 | 0 | 1      | 459.2548 | 1375.75  | 0.97  | 0.00044  | 5.945319 |
| P06727 | 0 | 0.6667 | 508.6325 | 1523.883 | 2.95  | 0.0015   | 23.82719 |
| P06727 | 0 | 0.7895 | 508.6307 | 1523.878 | -0.48 | -0.00024 | 18.75703 |
| P06727 | 1 | 1      | 432.758  | 1728.01  | 3.11  | 0.00134  | 12.96531 |
| P06727 | 1 | 1      | 576.6749 | 1728.01  | 3.23  | 0.00186  | 26.38807 |
| P06727 | 1 | 1      | 432.7571 | 1728.007 | 1.21  | 0.00052  | 6.554672 |
| P06727 | 1 | 1      | 432.7561 | 1728.003 | -1.2  | -0.00052 | 0        |
| P06727 | 0 | 0.971  | 644.3378 | 1287.668 | 2.51  | 0.00161  | 0        |
| P06727 | 1 | 0.9362 | 557.795  | 2228.158 | 1.95  | 0.00109  | 7.521988 |
| P06727 | 0 | 1      | 485.9406 | 1455.807 | -0.3  | -0.00014 | 4.45916  |
| P06727 | 0 | 1      | 485.9414 | 1455.81  | 1.4   | 0.00068  | 17.3245  |
| P06727 | 0 | 0.2069 | 568.3085 | 1702.911 | 2.56  | 0.00145  | 2.108785 |
| P06727 | 0 | 0.9167 | 728.4081 | 1455.809 | 0.95  | 0.00069  | 18.70685 |
| P06727 | 0 | 1      | 485.941  | 1455.808 | 0.58  | 0.00028  | 3.132308 |
| P06727 | 0 | 0.2093 | 616.343  | 1847.015 | 3.11  | 0.00192  | 11.43126 |
| P06727 | 0 | 1      | 698.713  | 2094.124 | 1     | 0.0007   | 36.06151 |
| P06727 | 0 | 1      | 524.2882 | 2094.131 | 4.2   | 0.0022   | 34.54065 |
| P06727 | 0 | 0.9815 | 524.2865 | 2094.124 | 0.94  | 0.00049  | 5.559986 |
| P06727 | 0 | 0.2037 | 568.3082 | 1702.91  | 1.91  | 0.00109  | 16.58995 |
| P06727 | 1 | 1      | 432.7581 | 1728.011 | 3.4   | 0.00147  | 33.37627 |
| P06727 | 0 | 0.7385 | 488.2583 | 975.5093 | -1.32 | -0.00064 | 9.932269 |
| P06727 | 0 | 1      | 437.9071 | 1311.707 | 0.91  | 0.0004   | 0        |
| P06727 | 0 | 0.8571 | 680.3816 | 1359.756 | 1.78  | 0.00121  | 0        |
| P06727 | 0 | 0.8795 | 644.3375 | 1287.668 | 2.03  | 0.00131  | 0        |
| P06727 | 1 | 1      | 420.5622 | 1259.672 | 1.42  | 0.0006   | 5.253106 |
| P06727 | 0 | 1      | 691.3559 | 2072.053 | 0.12  | 0.00008  | 2.560395 |
| P06727 | 0 | 1      | 691.3562 | 2072.054 | 0.56  | 0.00039  | 2.336205 |
| P06727 | 0 | 1      | 691.3561 | 2072.054 | 0.47  | 0.00032  | 11.38219 |
| P06727 | 0 | 0.8788 | 477.9281 | 1431.77  | 1.7   | 0.00081  | 64.45287 |
| P06727 | 0 | 0.8923 | 716.3876 | 1431.768 | 0.54  | 0.00039  | 3.175633 |
| P06727 | 0 | 0.8545 | 477.9275 | 1431.768 | 0.55  | 0.00026  | 6.002842 |
| P06727 | 0 | 0.8298 | 716.3881 | 1431.769 | 1.22  | 0.00088  | 2.696838 |
| P06727 | 0 | 0.7826 | 551.7913 | 1102.575 | 1.24  | 0.00068  | 34.6492  |
| P06727 | 0 | 0.6429 | 688.3881 | 1375.769 | 1.27  | 0.00087  | 35.07481 |
| P06727 | 0 | 0.5636 | 459.2609 | 1375.768 | 0.81  | 0.00037  | 32.39775 |
| P06727 | 0 | 0.6724 | 688.3873 | 1375.767 | 0.2   | 0.00014  | 10.79175 |
| P06727 | 0 | 0.8039 | 623.8427 | 1246.678 | 1.77  | 0.0011   | 3.595778 |



|        |   |        |          |          |       |          |          |
|--------|---|--------|----------|----------|-------|----------|----------|
| P06727 | 0 | 0.9091 | 621.3596 | 1241.712 | 2.23  | 0.00138  | 5.21404  |
| P06727 | 0 | 0.9211 | 414.5747 | 1241.71  | 0.3   | 0.00012  | 8.905455 |
| P06727 | 0 | 0.8113 | 621.3595 | 1241.712 | 2.03  | 0.00126  | 4.161651 |
| P06727 | 0 | 0.8108 | 414.5747 | 1241.709 | 0.22  | 0.00009  | 0        |
| P06727 | 0 | 0.8163 | 567.8221 | 1134.637 | 1.16  | 0.00066  | 16.09152 |
| P06727 | 1 | 1      | 547.6269 | 1640.866 | 1.62  | 0.00089  | 8.863574 |
| P06727 | 1 | 1      | 547.6267 | 1640.866 | 1.28  | 0.0007   | 12.07576 |
| P06727 | 1 | 1      | 547.627  | 1640.866 | 1.73  | 0.00095  | 11.96443 |
| P06727 | 1 | 0.7179 | 421.9262 | 1263.764 | 0.58  | 0.00024  | 27.55602 |
| P06727 | 0 | 0.8806 | 492.2805 | 983.5536 | 1.64  | 0.00081  | 2.910095 |
| P06727 | 0 | 0.7455 | 560.3099 | 1119.612 | -0.12 | -0.00007 | 5.986587 |
| P06727 | 0 | 0.9048 | 546.9584 | 1638.861 | 1.86  | 0.00101  | 8.813287 |
| P06727 | 0 | 0.8442 | 819.9335 | 1638.86  | 1.27  | 0.00104  | 6.55032  |
| P06727 | 0 | 0.9848 | 546.9592 | 1638.863 | 3.31  | 0.00181  | 8.178195 |
| P06727 | 0 | 0.8923 | 848.4622 | 1695.917 | 0.94  | 0.0008   | 5.724376 |
| P06727 | 0 | 0.9286 | 644.3373 | 1287.667 | 1.75  | 0.00113  | 12.63548 |
| P06727 | 0 | 0.8919 | 644.3373 | 1287.667 | 1.65  | 0.00107  | 0        |
| P06727 | 0 | 1      | 571.3062 | 2282.203 | 2.15  | 0.00122  | 4.440652 |
| P06727 | 0 | 0.8675 | 644.3377 | 1287.668 | 2.32  | 0.00149  | 1.961263 |
| P06727 | 0 | 1      | 571.3081 | 2282.211 | 5.57  | 0.00318  | 62.94411 |
| P06727 | 0 | 0.9655 | 565.9764 | 1695.915 | -0.47 | -0.00026 | 8.078141 |
| P06727 | 0 | 0.9231 | 686.3735 | 1371.74  | -0.11 | -0.00008 | 13.8649  |
| P06727 | 1 | 0.5714 | 438.7477 | 1751.969 | -0.25 | -0.00011 | 33.4566  |
| P06727 | 0 | 0.7564 | 488.2597 | 975.5121 | 1.56  | 0.00076  | 0        |
| P06727 | 1 | 1      | 584.6623 | 1751.972 | 1.77  | 0.00104  | 13.97711 |
| P06727 | 0 | 0.6    | 624.8391 | 1248.671 | 0.29  | 0.00018  | 6.674681 |
| P06727 | 0 | 0.68   | 564.3319 | 1127.657 | 2.18  | 0.00123  | 3.19594  |
| P06727 | 0 | 0.1316 | 462.508  | 1847.01  | 0.69  | 0.00032  | 13.38709 |
| P06727 | 0 | 0.1731 | 616.3409 | 1847.008 | -0.36 | -0.00022 | 41.0845  |
| P06727 | 1 | 1      | 547.6269 | 1640.866 | 1.62  | 0.00089  | 14.29256 |
| P06727 | 1 | 0.6579 | 530.3025 | 1588.893 | 2.04  | 0.00108  | 7.031206 |
| P06727 | 0 | 0.9677 | 546.9578 | 1638.859 | 0.74  | 0.0004   | 11.29132 |
| P06727 | 0 | 0.881  | 621.3593 | 1241.711 | 1.73  | 0.00108  | 6.430236 |
| P06727 | 0 | 0.6176 | 414.5739 | 1241.707 | -1.69 | -0.0007  | 83.02617 |
| P06727 | 0 | 0.7778 | 565.9778 | 1695.919 | 1.91  | 0.00108  | 0        |
| P06727 | 0 | 1      | 573.6406 | 1718.907 | 3.33  | 0.00191  | 43.21102 |
| P06727 | 0 | 1      | 621.673  | 1863.005 | 0.48  | 0.0003   | 18.85314 |
| P06727 | 0 | 0.9825 | 608.3307 | 1215.654 | 2.21  | 0.00134  | 0        |
| P06727 | 0 | 0.7333 | 560.3109 | 1119.614 | 1.62  | 0.00091  | 0        |
| P06727 | 0 | 1      | 761.405  | 2282.2   | 1.08  | 0.00082  | 3.00439  |
| P06727 | 0 | 1      | 492.2794 | 983.5514 | -0.59 | -0.00029 | 9.874304 |
| P06727 | 0 | 0.85   | 567.8228 | 1134.638 | 2.34  | 0.00133  | 24.86612 |
| P06727 | 0 | 0.9211 | 414.5743 | 1241.708 | -0.59 | -0.00024 | 8.378055 |
| P06727 | 0 | 0.92   | 641.687  | 1923.046 | 2.04  | 0.00131  | 6.386996 |
| P06727 | 0 | 0.75   | 508.6315 | 1523.88  | 0.96  | 0.00049  | 14.29564 |
| P06727 | 0 | 0.8125 | 460.5969 | 1379.776 | -0.21 | -0.0001  | 34.3982  |
| P06727 | 1 | 1      | 547.6261 | 1640.864 | 0.17  | 0.00009  | 14.75041 |
| P06727 | 0 | 0.9062 | 524.2867 | 2094.125 | 1.41  | 0.00074  | 18.60154 |
| P06727 | 1 | 1      | 410.9719 | 1640.866 | 1.46  | 0.0006   | 16.50284 |
| P06727 | 0 | 0.7105 | 455.5868 | 1364.746 | 0.35  | 0.00016  | 7.692957 |
| P06727 | 0 | 0.8125 | 567.8209 | 1134.635 | -0.99 | -0.00056 | 5.167284 |
| P06727 | 0 | 1      | 414.5749 | 1241.71  | 0.67  | 0.00028  | 68.42307 |

|        |   |        |          |          |       |          |          |
|--------|---|--------|----------|----------|-------|----------|----------|
| P06727 | 0 | 1      | 641.6881 | 1923.05  | 3.66  | 0.00235  | 0        |
| P06727 | 0 | 0.74   | 488.2595 | 975.5116 | 1.12  | 0.00055  | 32.80059 |
| P06727 | 0 | 0.907  | 688.3786 | 1375.75  | 1.11  | 0.00076  | 2.541368 |
| P06727 | 0 | 0.76   | 560.3115 | 1119.616 | 2.82  | 0.00158  | 51.39714 |
| P06727 | 0 | 0.8372 | 567.8225 | 1134.638 | 1.69  | 0.00096  | 0.810582 |
| P06727 | 0 | 0.9231 | 567.8218 | 1134.636 | 0.62  | 0.00035  | 38.15883 |
| P06727 | 0 | 1      | 690.3925 | 1379.778 | 0.95  | 0.00066  | 6.02578  |
| P06727 | 0 | 1      | 485.9418 | 1455.811 | 2.28  | 0.00111  | 0        |
| P06727 | 0 | 1      | 644.3386 | 1287.67  | 3.74  | 0.00241  | 50.02164 |
| P06727 | 0 | 0.8235 | 623.8434 | 1246.679 | 2.85  | 0.00177  | 0        |
| P06727 | 0 | 0.7297 | 616.3367 | 1231.666 | 0.93  | 0.00057  | 12.06413 |
| P06727 | 1 | 0.963  | 378.212  | 1132.622 | -0.54 | -0.0002  | 25.40339 |
| P06727 | 0 | 1      | 459.2536 | 1375.746 | -1.56 | -0.00072 | 62.52724 |
| P06727 | 0 | 0.375  | 459.2616 | 1375.77  | 2.34  | 0.00107  | 49.72394 |
| P06727 | 0 | 1      | 614.3251 | 1227.643 | 4.16  | 0.00255  | 61.49575 |
| P06727 | 0 | 0.6571 | 624.8386 | 1248.67  | -0.39 | -0.00025 | 5.827014 |
| P06727 | 1 | 0.5238 | 416.9348 | 1248.79  | 0.93  | 0.00039  | 13.72218 |
| P06727 | 1 | 1      | 576.6737 | 1728.007 | 1.11  | 0.00064  | 68.68835 |
| P06727 | 0 | 0.3793 | 429.8934 | 1287.666 | 0.46  | 0.0002   | 40.90447 |
| P06727 | 0 | 0.6905 | 549.3079 | 1097.608 | 1.2   | 0.00066  | 24.27081 |
| P06727 | 0 | 1      | 682.8772 | 1364.747 | 1.37  | 0.00093  | 21.45703 |
| P06727 | 1 | 0.9167 | 584.6606 | 1751.967 | -1.05 | -0.00061 | 21.3231  |
| P06727 | 0 | 1      | 567.822  | 1134.637 | 0.94  | 0.00053  | 46.50326 |
| P06727 | 1 | 0.125  | 498.5348 | 1991.117 | 9.45  | 0.00471  | 27.9258  |
| P06727 | 0 | 0.9118 | 437.9075 | 1311.708 | 1.82  | 0.0008   | 61.70761 |
| P06727 | 0 | 0.8571 | 691.3562 | 2072.054 | 0.56  | 0.00039  | 7.475385 |
| P06727 | 0 | 0.5526 | 552.789  | 1104.571 | 2.11  | 0.00116  | 13.54788 |
| P06727 | 0 | 1      | 495.5926 | 1484.763 | 0.58  | 0.00029  | 47.19476 |
| P06727 | 0 | 0.5    | 643.3225 | 1927.953 | 1.02  | 0.00065  | 6.272182 |
| P06727 | 0 | 0.7391 | 680.3818 | 1359.756 | 2.05  | 0.0014   | 3.480474 |
| P06727 | 0 | 0.9189 | 614.3234 | 1227.639 | 1.37  | 0.00084  | 7.348125 |
| P06727 | 0 | 0.5429 | 564.3317 | 1127.656 | 1.75  | 0.00098  | 14.57245 |
| P06727 | 1 | 0.55   | 416.9349 | 1248.79  | 1.07  | 0.00045  | 22.4493  |
| P06727 | 0 | 0.95   | 477.9273 | 1431.767 | 0.04  | 0.00002  | 19.12751 |
| P06727 | 1 | 0.9574 | 630.3394 | 1259.671 | 0.95  | 0.0006   | 5.222537 |
| P06727 | 0 | 0.8929 | 560.3115 | 1119.616 | 2.82  | 0.00158  | 56.12635 |
| P06727 | 0 | 1      | 457.918  | 1371.74  | -0.21 | -0.0001  | 8.617443 |
| P06727 | 0 | 0.8    | 762.4434 | 1523.879 | 0.69  | 0.00053  | 5.255046 |
| P06727 | 0 | 0.6667 | 623.8425 | 1246.678 | 1.48  | 0.00092  | 30.21508 |
| P06727 | 0 | 0.7667 | 728.4088 | 1455.81  | 1.79  | 0.0013   | 18.20561 |
| P06727 | 1 | 1      | 547.626  | 1640.864 | 0.06  | 0.00003  | 33.06539 |
| P06727 | 1 | 0.5263 | 416.9347 | 1248.79  | 0.71  | 0.00029  | 27.50972 |
| P06727 | 0 | 0.5    | 462.5078 | 1847.009 | 0.3   | 0.00014  | 39.25159 |
| P06727 | 0 | 0.5556 | 552.7901 | 1104.573 | 4.1   | 0.00226  | 0        |
| P06727 | 0 | 0.6389 | 488.2588 | 975.5104 | -0.19 | -0.00009 | 22.1055  |
| P06727 | 0 | 1      | 742.8857 | 1484.764 | 1.25  | 0.00093  | 34.21469 |
| P04275 | 0 | 0.9434 | 816.3906 | 2447.157 | 0.38  | 0.00031  | 2.21813  |
| P04275 | 0 | 1      | 816.392  | 2447.162 | 2.1   | 0.00171  | 6.001658 |
| P04275 | 0 | 0.9111 | 588.9815 | 1764.93  | 2.9   | 0.00171  | 7.378235 |
| P04275 | 0 | 0.878  | 882.9679 | 1764.929 | 2.08  | 0.00184  | 7.120953 |
| P04275 | 0 | 0.6389 | 510.3039 | 1528.897 | 2.18  | 0.00111  | 45.90638 |
| P04275 | 0 | 1      | 853.4756 | 2558.412 | 2.48  | 0.00211  | 3.401361 |

|        |   |        |          |          |       |         |          |
|--------|---|--------|----------|----------|-------|---------|----------|
| P04275 | 0 | 1      | 767.7529 | 2301.244 | 1.05  | 0.00081 | 22.84845 |
| P04275 | 0 | 1      | 500.2304 | 1498.677 | 0.66  | 0.00033 | 10.61148 |
| P04275 | 0 | 1      | 605.6671 | 1814.987 | 4.56  | 0.00276 | 0        |
| P04275 | 0 | 1      | 426.5566 | 1277.655 | 0.99  | 0.00042 | 59.24736 |
| P04275 | 0 | 1      | 480.2385 | 1438.701 | 2.21  | 0.00106 | 58.1483  |
| P04275 | 0 | 0.7805 | 442.2282 | 1324.67  | 0.87  | 0.00038 | 8.0851   |
| P04275 | 0 | 0.7292 | 662.8394 | 1324.671 | 2.03  | 0.00134 | 21.44722 |
| P04275 | 0 | 0.6604 | 598.3169 | 1195.627 | 2.87  | 0.00171 | 7.044303 |
| P04275 | 0 | 0.9661 | 610.9149 | 1220.822 | 0.32  | 0.0002  | 46.55073 |
| P04275 | 0 | 0.8095 | 576.6539 | 1727.947 | 3.16  | 0.00182 | 31.35785 |
| P04275 | 1 | 1      | 561.9728 | 1683.904 | 3.55  | 0.00199 | 27.79349 |
| P04275 | 0 | 1      | 509.2938 | 1525.867 | 1.73  | 0.00088 | 60.20037 |
| P04275 | 0 | 1      | 591.8055 | 1182.604 | 3.7   | 0.00219 | 10.27722 |
| P04275 | 0 | 0.898  | 641.3529 | 1281.699 | 4.41  | 0.00283 | 12.44727 |
| P04275 | 0 | 1      | 441.2186 | 1321.641 | 2.18  | 0.00096 | 12.86118 |
| P04275 | 0 | 0.8788 | 545.3131 | 1089.619 | 1.5   | 0.00082 | 33.31208 |
| P04275 | 0 | 1      | 671.9686 | 2013.891 | 1.44  | 0.00096 | 34.09647 |
| P04275 | 1 | 0.9474 | 521.9753 | 1563.911 | 1.02  | 0.00053 | 32.03893 |
| P04275 | 0 | 1      | 488.2753 | 1462.811 | 0.01  | 0.00001 | 51.10168 |
| P04275 | 0 | 0.9091 | 533.6024 | 1598.793 | 1.01  | 0.00054 | 19.93452 |
| P04275 | 0 | 0.85   | 822.0936 | 2464.266 | 1.2   | 0.00099 | 9.721158 |
| P04275 | 0 | 0.8286 | 387.2112 | 1159.619 | 4.93  | 0.0019  | 15.81307 |
| P04275 | 0 | 0.7391 | 828.4188 | 3310.653 | -0.49 | -0.0004 | 3.680036 |
| P04275 | 0 | 0.3333 | 488.276  | 1462.814 | 1.58  | 0.00077 | 39.33599 |
| P04275 | 0 | 0.8293 | 399.2145 | 1195.629 | 5     | 0.00199 | 37.76895 |
| P04275 | 0 | 0.7778 | 568.3416 | 1135.676 | 1.08  | 0.00061 | 44.65006 |
| P04275 | 0 | 0.8462 | 796.4632 | 1591.919 | 0.97  | 0.00077 | 14.57251 |
| P04275 | 0 | 0.6176 | 495.2976 | 989.5879 | 1.89  | 0.00094 | 22.03168 |
| P04275 | 0 | 1      | 689.3414 | 1377.675 | 1.41  | 0.00097 | 0        |
| P04275 | 0 | 0.2857 | 521.6254 | 1562.862 | 0.92  | 0.00048 | 10.50297 |
| P04275 | 0 | 1      | 639.2921 | 1915.862 | 3.59  | 0.00229 | 6.513235 |
| P04275 | 0 | 1      | 657.3539 | 1313.701 | 2.74  | 0.0018  | 24.04216 |
| P00751 | 0 | 0.971  | 710.3867 | 1419.766 | 1.5   | 0.00107 | 0        |
| P00751 | 0 | 0.5714 | 555.345  | 1109.683 | 1.63  | 0.0009  | 8.607278 |
| P00751 | 0 | 0.9474 | 422.2594 | 1264.764 | 1.72  | 0.00072 | 11.96329 |
| P00751 | 1 | 1      | 510.9753 | 1530.911 | 1.2   | 0.00061 | 29.18293 |
| P00751 | 0 | 0.9661 | 533.5368 | 2131.125 | 2.47  | 0.00131 | 4.836981 |
| P00751 | 0 | 0.977  | 1066.066 | 2131.125 | 2.42  | 0.00258 | 0        |
| P00751 | 0 | 1      | 711.0461 | 2131.124 | 1.76  | 0.00125 | 4.960993 |
| P00751 | 1 | 0.9032 | 394.9765 | 1576.884 | 2.1   | 0.00083 | 14.35872 |
| P00751 | 0 | 0.8852 | 627.8516 | 1254.696 | 2.2   | 0.00138 | 5.725335 |
| P00751 | 0 | 0.8983 | 627.8518 | 1254.696 | 2.49  | 0.00156 | 6.496327 |
| P00751 | 0 | 1      | 422.2594 | 1264.764 | 1.57  | 0.00066 | 12.25582 |
| P00751 | 0 | 1      | 711.046  | 2131.123 | 1.5   | 0.00106 | 4.382853 |
| P00751 | 0 | 1      | 422.2596 | 1264.764 | 2.22  | 0.00094 | 13.90043 |
| P00751 | 0 | 0.8889 | 422.2598 | 1264.765 | 2.66  | 0.00112 | 13.5151  |
| P00751 | 1 | 0.7273 | 516.9888 | 1548.952 | 0.66  | 0.00034 | 13.35348 |
| P00751 | 0 | 1      | 756.3848 | 2267.14  | 0.2   | 0.00015 | 2.150215 |
| P00751 | 0 | 1      | 422.2618 | 1264.771 | 7.29  | 0.00307 | 21.17756 |
| P00751 | 0 | 0.8571 | 396.5961 | 1187.774 | 1.97  | 0.00078 | 19.4771  |
| P00751 | 0 | 0.8108 | 396.5956 | 1187.772 | 0.59  | 0.00023 | 11.55589 |
| P00751 | 0 | 0.8667 | 396.5962 | 1187.774 | 2.28  | 0.0009  | 31.0502  |

|        |   |        |          |          |       |          |          |
|--------|---|--------|----------|----------|-------|----------|----------|
| P00751 | 0 | 0.8889 | 396.5964 | 1187.775 | 2.67  | 0.00106  | 23.52549 |
| P00751 | 0 | 0.8462 | 396.5963 | 1187.774 | 2.51  | 0.00099  | 10.74182 |
| P00751 | 1 | 0.7241 | 394.9762 | 1576.883 | 1.41  | 0.00055  | 6.322933 |
| P00751 | 0 | 1      | 686.9892 | 2058.953 | 1.79  | 0.00123  | 9.820403 |
| P00751 | 0 | 0.973  | 1029.981 | 2058.954 | 2.45  | 0.00252  | 0        |
| P00751 | 0 | 1      | 686.9886 | 2058.951 | 0.9   | 0.00062  | 2.535333 |
| P00751 | 0 | 1      | 686.9895 | 2058.954 | 2.23  | 0.00153  | 1.570058 |
| P00751 | 0 | 0.7288 | 638.8823 | 1276.757 | 2.87  | 0.00183  | 5.540445 |
| P00751 | 0 | 0.96   | 521.9609 | 1563.868 | 1.39  | 0.00072  | 6.597873 |
| P00751 | 0 | 0.9722 | 782.4374 | 1563.867 | 0.89  | 0.00069  | 7.995002 |
| P00751 | 1 | 1      | 510.9746 | 1530.909 | 0.01  | 0        | 12.64827 |
| P00751 | 1 | 1      | 508.6362 | 1523.894 | 2.96  | 0.00151  | 5.860907 |
| P00751 | 0 | 1      | 422.2596 | 1264.764 | 2.15  | 0.00091  | 4.865951 |
| P00751 | 0 | 1      | 830.3937 | 3318.553 | 1.72  | 0.00143  | 11.6181  |
| P00751 | 1 | 0.8649 | 601.5865 | 2403.324 | 2.9   | 0.00174  | 6.990106 |
| P00751 | 1 | 0.9688 | 801.7785 | 2403.321 | 1.58  | 0.00127  | 4.910675 |
| P00751 | 1 | 0.5897 | 801.7799 | 2403.325 | 3.26  | 0.00261  | 19.21603 |
| P00751 | 0 | 1      | 987.1671 | 2959.487 | 2.89  | 0.00286  | 0        |
| P00751 | 0 | 1      | 516.2597 | 1546.765 | 1.79  | 0.00092  | 20.6384  |
| P00751 | 0 | 0.8929 | 481.9487 | 1443.831 | 1.21  | 0.00058  | 9.66556  |
| P00751 | 0 | 0.8472 | 722.4196 | 1443.832 | 1.47  | 0.00106  | 8.152803 |
| P00751 | 0 | 1      | 920.4788 | 2759.422 | -0.06 | -0.00005 | 14.83615 |
| P00751 | 0 | 1      | 968.5154 | 2903.532 | 2.7   | 0.00261  | 2.420519 |
| P00751 | 0 | 1      | 726.6376 | 2903.529 | 1.64  | 0.00119  | 2.85454  |
| P00751 | 0 | 0.8657 | 898.95   | 1796.893 | 1.2   | 0.00108  | 6.526073 |
| P00751 | 0 | 0.9733 | 599.6354 | 1796.892 | 0.72  | 0.00043  | 8.954595 |
| P00751 | 0 | 0.9286 | 599.6362 | 1796.894 | 2.04  | 0.00122  | 31.33358 |
| P00751 | 0 | 0.9054 | 670.3724 | 1339.737 | 2.04  | 0.00137  | 18.3385  |
| P00751 | 0 | 0.8983 | 670.3723 | 1339.737 | 1.86  | 0.00124  | 11.03575 |
| P00751 | 0 | 0.8824 | 708.3569 | 1415.706 | 1.39  | 0.00098  | 6.812879 |
| P00751 | 0 | 0.8409 | 708.3585 | 1415.71  | 3.63  | 0.00257  | 0        |
| P00751 | 1 | 0.75   | 526.2994 | 1576.884 | 1.92  | 0.00101  | 10.13564 |
| P00751 | 1 | 0.6667 | 788.9436 | 1576.88  | -0.51 | -0.0004  | 0        |
| P00751 | 0 | 1      | 1480.242 | 2959.477 | -0.48 | -0.00072 | 0        |
| P00751 | 1 | 1      | 508.6351 | 1523.891 | 0.68  | 0.00035  | 63.22187 |
| P00751 | 0 | 1      | 456.2074 | 1366.608 | 1.43  | 0.00065  | 16.23639 |
| P00751 | 0 | 1      | 1452.265 | 2903.522 | -0.58 | -0.00084 | 0        |
| P00751 | 0 | 1      | 690.6116 | 2759.425 | 1.02  | 0.00071  | 0        |
| P00751 | 0 | 1      | 987.1656 | 2959.482 | 1.41  | 0.00139  | 1.56303  |
| P00751 | 1 | 1      | 532.2913 | 1594.859 | 1.73  | 0.00092  | 13.60316 |
| P00751 | 1 | 1      | 532.291  | 1594.858 | 1.04  | 0.00055  | 7.796257 |
| P00751 | 0 | 0.9412 | 564.2938 | 1690.867 | 1.81  | 0.00102  | 35.69373 |
| P00751 | 0 | 1      | 564.2949 | 1690.87  | 3.76  | 0.00212  | 9.032003 |
| P00751 | 0 | 1      | 564.2948 | 1690.87  | 3.54  | 0.002    | 23.67762 |
| P00751 | 0 | 0.973  | 408.5679 | 1223.689 | 2.14  | 0.00087  | 30.70784 |
| P00751 | 1 | 0.8056 | 526.2996 | 1576.884 | 2.15  | 0.00113  | 27.09617 |
| P00751 | 0 | 1      | 504.2412 | 1510.709 | 1     | 0.00051  | 4.939027 |
| P00751 | 1 | 1      | 537.9826 | 1611.933 | 0.93  | 0.0005   | 15.40468 |
| P00751 | 0 | 0.7609 | 580.3274 | 1159.648 | 3.1   | 0.0018   | 5.770638 |
| P00751 | 0 | 0.963  | 638.6985 | 1914.081 | 2.67  | 0.0017   | 12.14157 |
| P00751 | 0 | 1      | 957.5457 | 1914.084 | 4.3   | 0.00412  | 9.426233 |
| P00751 | 0 | 0.9468 | 782.1772 | 3125.687 | 3.45  | 0.0027   | 7.368198 |

|        |   |        |          |          |       |          |          |
|--------|---|--------|----------|----------|-------|----------|----------|
| P00751 | 0 | 0.9925 | 1042.566 | 3125.684 | 2.5   | 0.00261  | 7.911452 |
| P00751 | 0 | 0.973  | 456.6019 | 1367.791 | 1.86  | 0.00085  | 39.62049 |
| P00751 | 0 | 1      | 456.6016 | 1367.79  | 1.19  | 0.00054  | 8.223703 |
| P00751 | 0 | 0.8684 | 795.4335 | 1589.86  | 2.35  | 0.00186  | 6.455199 |
| P00751 | 0 | 0.8571 | 795.4324 | 1589.857 | 0.96  | 0.00077  | 3.846954 |
| P00751 | 0 | 1      | 456.6009 | 1367.788 | -0.22 | -0.0001  | 6.019475 |
| P00751 | 0 | 0.9592 | 795.4333 | 1589.859 | 2.12  | 0.00168  | 4.24999  |
| P00751 | 0 | 1      | 504.2414 | 1510.71  | 1.37  | 0.00069  | 47.33707 |
| P00751 | 0 | 0.8519 | 636.3065 | 1271.606 | 2.51  | 0.0016   | 4.998684 |
| P00751 | 0 | 0.9756 | 698.7278 | 2094.169 | 1.35  | 0.00094  | 4.181775 |
| P00751 | 0 | 1      | 1047.589 | 2094.17  | 1.79  | 0.00187  | 0        |
| P00751 | 0 | 0.9815 | 723.3821 | 1445.757 | 2.17  | 0.00157  | 0        |
| P00751 | 0 | 0.875  | 664.5167 | 3318.555 | 2.21  | 0.00147  | 5.435781 |
| P00751 | 0 | 1      | 756.3847 | 2267.14  | 0.12  | 0.00009  | 0        |
| P00751 | 1 | 0.9355 | 394.9767 | 1576.885 | 2.57  | 0.00101  | 35.79996 |
| P00751 | 0 | 1      | 686.9891 | 2058.953 | 1.7   | 0.00117  | 4.0786   |
| P00751 | 0 | 0.7317 | 387.22   | 1159.645 | 1.25  | 0.00048  | 0        |
| P00751 | 0 | 0.9273 | 597.3141 | 1193.621 | 3.24  | 0.00193  | 6.20182  |
| P00751 | 0 | 0.8679 | 650.3694 | 1299.731 | 2.96  | 0.00192  | 7.51497  |
| P00751 | 0 | 0.7647 | 533.5364 | 2131.124 | 1.66  | 0.00089  | 3.996831 |
| P00751 | 1 | 1      | 797.9333 | 1594.859 | 1.66  | 0.00133  | 6.03642  |
| P00751 | 0 | 0.8095 | 396.5959 | 1187.773 | 1.43  | 0.00057  | 16.52132 |
| P00751 | 0 | 0.8448 | 795.433  | 1589.859 | 1.73  | 0.00138  | 4.13811  |
| P00751 | 0 | 0.766  | 580.3259 | 1159.644 | 0.47  | 0.00027  | 8.886348 |
| P00751 | 0 | 0.7778 | 580.3277 | 1159.648 | 3.63  | 0.0021   | 4.041078 |
| P00751 | 0 | 0.6944 | 722.4201 | 1443.833 | 2.24  | 0.00161  | 18.94279 |
| P00751 | 0 | 0.9524 | 472.5729 | 1415.704 | -0.18 | -0.00008 | 8.247107 |
| P00751 | 0 | 0.7234 | 447.2507 | 1339.738 | 2.1   | 0.00094  | 13.06293 |
| P00751 | 0 | 1      | 567.5424 | 2267.148 | 3.67  | 0.00208  | 8.801049 |
| P00751 | 0 | 0.9412 | 472.5748 | 1415.71  | 3.71  | 0.00175  | 11.46249 |
| P00751 | 0 | 1      | 698.7293 | 2094.173 | 3.44  | 0.0024   | 0        |
| P00751 | 1 | 0.6176 | 526.2996 | 1576.884 | 2.27  | 0.00119  | 13.94493 |
| P00751 | 0 | 0.9487 | 652.8472 | 1304.687 | 2.57  | 0.00167  | 0        |
| P00751 | 0 | 0.3953 | 555.3447 | 1109.682 | 1.08  | 0.0006   | 19.87695 |
| P00751 | 1 | 1      | 381.7286 | 1523.893 | 2.03  | 0.00077  | 48.87504 |
| P00751 | 0 | 0.9623 | 597.3142 | 1193.621 | 3.44  | 0.00206  | 2.793723 |
| P00751 | 0 | 1      | 638.9561 | 1914.854 | 3.39  | 0.00217  | 19.65021 |
| P00751 | 0 | 1      | 472.5729 | 1415.704 | -0.18 | -0.00008 | 42.16849 |
| P00751 | 0 | 0.7188 | 481.9486 | 1443.831 | 0.96  | 0.00046  | 9.288033 |
| P00751 | 0 | 0.5745 | 555.3455 | 1109.684 | 2.62  | 0.00145  | 2.848327 |
| P00751 | 0 | 1      | 632.8857 | 1264.764 | 2.09  | 0.00132  | 0        |
| P00751 | 0 | 0.8478 | 627.8525 | 1254.698 | 3.56  | 0.00223  | 9.552679 |
| P00751 | 1 | 0.8387 | 394.9766 | 1576.885 | 2.41  | 0.00095  | 15.53287 |
| P00751 | 0 | 1      | 504.2412 | 1510.709 | 0.88  | 0.00045  | 17.72828 |
| P00751 | 1 | 0.68   | 394.9763 | 1576.883 | 1.64  | 0.00065  | 6.605728 |
| P00751 | 1 | 1      | 394.9765 | 1576.884 | 2.1   | 0.00083  | 19.84956 |
| P00751 | 0 | 1      | 567.5418 | 2267.145 | 2.59  | 0.00147  | 38.75033 |
| P00751 | 0 | 1      | 435.5667 | 1304.686 | 1.43  | 0.00062  | 34.62851 |
| P00751 | 0 | 0.8333 | 521.9597 | 1563.865 | -0.96 | -0.0005  | 0        |
| P00751 | 0 | 0.8889 | 482.2899 | 963.5726 | 1.3   | 0.00063  | 19.68523 |
| P00751 | 1 | 0.9355 | 394.9765 | 1576.884 | 2.1   | 0.00083  | 22.0052  |
| P00751 | 0 | 0.9583 | 522.3395 | 1043.672 | 2.36  | 0.00123  | 27.13828 |

|        |   |        |          |          |       |          |          |
|--------|---|--------|----------|----------|-------|----------|----------|
| P00751 | 0 | 1      | 435.567  | 1304.686 | 2     | 0.00087  | 16.81132 |
| P00751 | 0 | 0.9535 | 795.4337 | 1589.86  | 2.58  | 0.00205  | 5.839256 |
| P00751 | 0 | 0.6667 | 711.0465 | 2131.125 | 2.27  | 0.00161  | 40.5974  |
| P00751 | 0 | 0.9167 | 521.9591 | 1563.863 | -2.13 | -0.00111 | 23.96799 |
| P00751 | 0 | 0.8276 | 711.0472 | 2131.127 | 3.22  | 0.00228  | 15.48601 |
| P00751 | 0 | 0.6    | 555.3458 | 1109.684 | 3.06  | 0.0017   | 31.50518 |
| P00751 | 1 | 0.6923 | 394.976  | 1576.882 | 0.79  | 0.00031  | 60.94225 |
| P00751 | 0 | 0.7619 | 599.6362 | 1796.894 | 1.94  | 0.00116  | 51.11195 |
| P00751 | 0 | 0.9333 | 482.2907 | 963.574  | 2.82  | 0.00136  | 30.00072 |
| P00751 | 0 | 0.7812 | 594.3909 | 1187.774 | 2.57  | 0.00153  | 7.733742 |
| P00751 | 0 | 1      | 555.8005 | 1110.594 | 2.38  | 0.00132  | 38.21141 |
| P00751 | 1 | 0.963  | 427.5829 | 1280.734 | 1.42  | 0.00061  | 15.70513 |
| P00751 | 0 | 0.6098 | 555.3455 | 1109.684 | 2.62  | 0.00145  | 34.25141 |
| P00751 | 0 | 0.9024 | 560.8347 | 1120.662 | 2.26  | 0.00127  | 2.26825  |
| P00751 | 0 | 1      | 456.6009 | 1367.788 | -0.35 | -0.00016 | 60.15947 |
| P00751 | 0 | 1      | 530.6243 | 1589.858 | 1.57  | 0.00083  | 8.884882 |
| P00751 | 0 | 0.9333 | 482.2902 | 963.5731 | 1.87  | 0.0009   | 4.96421  |
| P00751 | 1 | 0.9394 | 478.2647 | 1432.78  | 0.69  | 0.00033  | 18.21968 |
| P00751 | 1 | 0.9394 | 478.2647 | 1432.78  | 0.69  | 0.00033  | 18.21968 |
| P00751 | 0 | 1      | 530.6245 | 1589.859 | 1.91  | 0.00101  | 16.70636 |
| P00751 | 0 | 1      | 632.8857 | 1264.764 | 1.99  | 0.00126  | 0        |
| P00751 | 0 | 1      | 566.8311 | 1132.655 | 2.93  | 0.00166  | 40.41989 |
| P00751 | 0 | 0.9643 | 530.6242 | 1589.858 | 1.34  | 0.00071  | 25.86917 |
| P00751 | 0 | 0.2647 | 555.3464 | 1109.686 | 4.27  | 0.00237  | 22.60035 |
| P00751 | 0 | 0.75   | 564.2934 | 1690.866 | 1.05  | 0.00059  | 52.05381 |
| P00751 | 0 | 0.6579 | 580.3274 | 1159.648 | 3.1   | 0.0018   | 0        |
| P00751 | 0 | 0.4583 | 426.256  | 1276.754 | -0.1  | -0.00004 | 0        |
| P00751 | 0 | 0.8095 | 670.3723 | 1339.737 | 1.95  | 0.0013   | 15.45217 |
| P00751 | 0 | 0.7826 | 564.2919 | 1690.861 | -1.55 | -0.00087 | 16.24173 |
| P00751 | 0 | 0.5778 | 555.3444 | 1109.681 | 0.53  | 0.00029  | 5.686904 |
| P00751 | 1 | 0.9524 | 532.2911 | 1594.859 | 1.39  | 0.00074  | 4.331127 |
| P00751 | 0 | 1      | 396.5963 | 1187.774 | 2.43  | 0.00096  | 28.33862 |
| P00751 | 0 | 0.9524 | 530.6251 | 1589.861 | 3.07  | 0.00163  | 35.17256 |
| P00751 | 0 | 0.6875 | 580.3287 | 1159.65  | 5.42  | 0.00314  | 0        |
| P00751 | 0 | 0.9615 | 684.3979 | 1367.789 | -0.01 | -0.00001 | 0        |
| P00751 | 0 | 0.9512 | 723.3818 | 1445.756 | 1.66  | 0.0012   | 0        |
| P00751 | 0 | 0.7308 | 530.6244 | 1589.859 | 1.68  | 0.00089  | 19.86831 |
| P00751 | 0 | 0.7407 | 580.3283 | 1159.649 | 4.68  | 0.00271  | 22.41094 |
| P00751 | 0 | 0.8571 | 722.4171 | 1443.827 | -1.99 | -0.00144 | 29.72464 |
| P00751 | 0 | 0.9091 | 670.3724 | 1339.738 | 2.13  | 0.00143  | 45.99954 |
| P00751 | 1 | 0.7333 | 383.4837 | 1530.913 | 2.29  | 0.00088  | 38.27532 |
| P00751 | 0 | 0.75   | 482.2902 | 963.5732 | 1.93  | 0.00093  | 31.66308 |
| P00751 | 0 | 1      | 580.3257 | 1159.644 | 0.26  | 0.00015  | 11.84299 |
| P00751 | 0 | 0.5263 | 599.6369 | 1796.896 | 3.16  | 0.00189  | 23.02805 |
| Q14624 | 0 | 0.7097 | 658.3845 | 1315.762 | 2.15  | 0.00141  | 4.113268 |
| Q14624 | 0 | 0.7708 | 658.3846 | 1315.762 | 2.33  | 0.00153  | 35.02773 |
| Q14624 | 0 | 0.375  | 665.6874 | 1995.048 | 0.83  | 0.00055  | 8.119791 |
| Q14624 | 0 | 0.3288 | 998.0297 | 1995.052 | 3.07  | 0.00306  | 7.732388 |
| Q14624 | 0 | 0.4545 | 665.6887 | 1995.051 | 2.76  | 0.00183  | 0        |
| Q14624 | 0 | 0.96   | 671.02   | 2011.046 | 2.32  | 0.00156  | 8.135596 |
| Q14624 | 0 | 1      | 546.3308 | 1636.978 | 1.98  | 0.00108  | 12.81206 |
| Q14624 | 0 | 1      | 471.2581 | 1411.76  | 1.77  | 0.00083  | 24.70513 |

|        |   |        |          |          |      |         |          |
|--------|---|--------|----------|----------|------|---------|----------|
| Q14624 | 0 | 1      | 546.3308 | 1636.978 | 1.98 | 0.00108 | 11.63118 |
| Q14624 | 0 | 0.8393 | 746.9414 | 1492.876 | 1.98 | 0.00148 | 3.440629 |
| Q14624 | 0 | 0.8393 | 746.9414 | 1492.876 | 1.98 | 0.00148 | 3.440629 |
| Q14624 | 0 | 1      | 469.9257 | 1407.763 | -1.5 | -0.0007 | 5.428913 |
| Q14624 | 0 | 0.8667 | 469.9266 | 1407.765 | 0.32 | 0.00015 | 4.595383 |
| Q14624 | 0 | 1      | 471.2578 | 1411.759 | 1.25 | 0.00059 | 0.358704 |
| Q14624 | 0 | 1      | 471.2575 | 1411.758 | 0.41 | 0.00019 | 10.37742 |
| Q14624 | 0 | 0.9615 | 818.9929 | 1636.979 | 2.4  | 0.00196 | 9.2919   |
| Q14624 | 0 | 1      | 546.3309 | 1636.978 | 2.09 | 0.00114 | 12.19857 |
| Q14624 | 0 | 0.7826 | 419.2752 | 1255.811 | 1.77 | 0.00074 | 22.07832 |
| Q14624 | 0 | 0.8462 | 419.2749 | 1255.81  | 0.96 | 0.0004  | 13.32171 |
| Q14624 | 0 | 0.9048 | 419.2751 | 1255.811 | 1.55 | 0.00065 | 16.4774  |
| Q14624 | 0 | 1      | 506.297  | 1516.876 | 2.55 | 0.00129 | 9.428925 |
| Q14624 | 0 | 0.9355 | 469.9269 | 1407.766 | 0.97 | 0.00046 | 8.280146 |
| Q14624 | 0 | 1      | 695.3903 | 2084.156 | 2.04 | 0.00142 | 20.23833 |
| Q14624 | 0 | 1      | 521.7938 | 2084.153 | 0.63 | 0.00033 | 15.08535 |
| Q14624 | 0 | 1      | 853.7694 | 2559.294 | 5.06 | 0.00432 | 9.482236 |
| Q14624 | 0 | 1      | 853.7665 | 2559.285 | 1.7  | 0.00145 | 3.222097 |
| Q14624 | 0 | 1      | 853.7659 | 2559.283 | 0.98 | 0.00084 | 2.260718 |
| Q14624 | 0 | 1      | 521.7943 | 2084.155 | 1.45 | 0.00075 | 2.992401 |
| Q14624 | 0 | 1      | 695.3904 | 2084.157 | 2.22 | 0.00154 | 3.472803 |
| Q14624 | 0 | 1      | 805.7312 | 2415.179 | 0.16 | 0.00013 | 14.30131 |
| Q14624 | 0 | 0.9487 | 521.7943 | 2084.155 | 1.45 | 0.00075 | 24.92296 |
| Q14624 | 0 | 1      | 521.7944 | 2084.156 | 1.68 | 0.00088 | 30.26072 |
| Q14624 | 0 | 0.9277 | 652.6903 | 1956.056 | 2.32 | 0.00151 | 4.608788 |
| Q14624 | 0 | 0.8493 | 978.5319 | 1956.056 | 2.36 | 0.00231 | 3.452519 |
| Q14624 | 0 | 1      | 652.6901 | 1956.056 | 1.95 | 0.00127 | 4.919642 |
| Q14624 | 0 | 0.7358 | 478.281  | 1432.828 | 2.39 | 0.00114 | 11.84977 |
| Q14624 | 0 | 0.9375 | 716.9171 | 1432.827 | 1.31 | 0.00094 | 6.107421 |
| Q14624 | 0 | 0.725  | 478.2807 | 1432.828 | 1.81 | 0.00086 | 22.20437 |
| Q14624 | 0 | 1      | 467.5686 | 1400.691 | 0.85 | 0.0004  | 5.109924 |
| Q14624 | 0 | 0.9231 | 700.8499 | 1400.693 | 1.71 | 0.0012  | 3.438399 |
| Q14624 | 0 | 1      | 467.5687 | 1400.692 | 1.05 | 0.00049 | 22.05987 |
| Q14624 | 0 | 1      | 805.7322 | 2415.182 | 1.45 | 0.00117 | 3.124756 |
| Q14624 | 0 | 0.918  | 746.9412 | 1492.875 | 1.74 | 0.0013  | 8.979471 |
| Q14624 | 0 | 0.918  | 746.9412 | 1492.875 | 1.74 | 0.0013  | 8.979471 |
| Q14624 | 0 |        | 498.2967 | 1492.876 | 1.98 | 0.00098 | 27.49652 |
| Q14624 | 0 | 0.0476 | 498.2967 | 1492.876 | 1.98 | 0.00098 | 27.49652 |
| Q14624 | 0 | 0.5667 | 471.2581 | 1411.76  | 1.83 | 0.00086 | 3.905124 |
| Q14624 | 0 | 1      | 471.2582 | 1411.76  | 1.9  | 0.00089 | 10.49336 |
| Q14624 | 0 | 0.9545 | 419.2753 | 1255.811 | 1.91 | 0.0008  | 18.31216 |
| Q14624 | 0 | 1      | 776.7393 | 2328.203 | 1.22 | 0.00095 | 10.25939 |
| Q14624 | 0 | 1      | 582.8076 | 2328.208 | 3.37 | 0.00196 | 2.16315  |
| Q14624 | 0 | 1      | 776.7396 | 2328.204 | 1.61 | 0.00125 | 2.112437 |
| Q14624 | 0 | 1      | 582.8066 | 2328.204 | 1.69 | 0.00098 | 2.080431 |
| Q14624 | 0 | 1      | 466.4465 | 2328.203 | 1.22 | 0.00057 | 2.602665 |
| Q14624 | 0 | 1      | 776.7395 | 2328.204 | 1.46 | 0.00113 | 2.405439 |
| Q14624 | 0 | 1      | 582.806  | 2328.202 | 0.74 | 0.00043 | 2.54459  |
| Q14624 | 0 | 1      | 546.7809 | 2184.102 | 1.58 | 0.00086 | 5.596146 |
| Q14624 | 0 | 0.9697 | 679.6956 | 2037.072 | 2.16 | 0.00147 | 40.7143  |
| Q14624 | 0 | 0.871  | 611.3776 | 1221.748 | 2.73 | 0.00167 | 6.566058 |
| Q14624 | 0 | 0.9565 | 730.4354 | 1459.864 | 1.76 | 0.00128 | 7.97149  |

|        |   |        |          |          |       |          |          |
|--------|---|--------|----------|----------|-------|----------|----------|
| Q14624 | 0 | 0.9753 | 893.0194 | 1785.032 | 1.54  | 0.00137  | 10.76258 |
| Q14624 | 0 | 0.8485 | 679.6955 | 2037.072 | 2.07  | 0.0014   | 21.9471  |
| Q14624 | 0 | 0.9219 | 679.6955 | 2037.072 | 2.07  | 0.0014   | 7.640445 |
| Q14624 | 0 | 0.9412 | 730.4355 | 1459.864 | 1.84  | 0.00134  | 12.77989 |
| Q14624 | 0 | 0.6579 | 532.627  | 1595.866 | 1.99  | 0.00106  | 24.65868 |
| Q14624 | 1 | 1      | 1239.607 | 2478.206 | -1.13 | -0.00139 | 0        |
| Q14624 | 1 | 1      | 826.7421 | 2478.212 | 1.01  | 0.00084  | 3.265714 |
| Q14624 | 0 | 0.746  | 596.3785 | 1191.75  | 2.42  | 0.00144  | 16.77308 |
| Q14624 | 0 | 1      | 1183.959 | 3549.864 | 1.55  | 0.00184  | 0        |
| Q14624 | 0 | 1      | 888.2216 | 3549.864 | 1.81  | 0.0016   | 4.160551 |
| Q14624 | 0 | 1      | 786.9382 | 1572.869 | 1.76  | 0.00138  | 6.829504 |
| Q14624 | 0 | 1      | 532.6267 | 1595.866 | 1.53  | 0.00081  | 45.11316 |
| Q14624 | 0 | 0.7561 | 524.9615 | 1572.87  | 2.21  | 0.00116  | 7.873148 |
| Q14624 | 0 | 0.9759 | 786.9382 | 1572.869 | 1.68  | 0.00132  | 5.99601  |
| Q14624 | 0 | 0.8448 | 786.9389 | 1572.871 | 2.61  | 0.00205  | 9.835069 |
| Q14624 | 0 | 0.9508 | 532.6276 | 1595.868 | 3.14  | 0.00167  | 11.59124 |
| Q14624 | 1 | 0.766  | 666.3734 | 1997.106 | 1.47  | 0.00098  | 11.58917 |
| Q14624 | 1 | 0.9091 | 500.0312 | 1997.103 | 0.03  | 0.00001  | 12.73623 |
| Q14624 | 1 | 1      | 656.718  | 1968.139 | 2.07  | 0.00136  | 18.66892 |
| Q14624 | 0 | 0.8696 | 532.6267 | 1595.866 | 1.53  | 0.00081  | 25.25371 |
| Q14624 | 0 | 0.9483 | 532.6265 | 1595.865 | 1.07  | 0.00057  | 2.432889 |
| Q14624 | 0 | 0.9783 | 798.4368 | 1595.866 | 2.04  | 0.00162  | 6.339597 |
| Q14624 | 1 | 0.7755 | 666.3746 | 1997.109 | 3.3   | 0.0022   | 18.62988 |
| Q14624 | 1 | 0.814  | 500.032  | 1997.106 | 1.8   | 0.0009   | 24.28378 |
| Q14624 | 0 | 1      | 532.6272 | 1595.867 | 2.45  | 0.0013   | 9.502354 |
| Q14624 | 0 | 1      | 532.6272 | 1595.867 | 2.45  | 0.0013   | 14.90127 |
| Q14624 | 0 | 0.9677 | 524.9609 | 1572.868 | 1.17  | 0.00061  | 19.60567 |
| Q14624 | 0 | 0.8    | 668.4295 | 1335.852 | 2.06  | 0.00137  | 6.727183 |
| Q14624 | 0 | 0.9    | 583.3306 | 1165.654 | 4.25  | 0.00248  | 4.674911 |
| Q14624 | 0 | 0.8889 | 583.3295 | 1165.652 | 2.47  | 0.00144  | 8.092896 |
| Q14624 | 0 | 1      | 778.8792 | 3112.495 | 2.23  | 0.00173  | 4.01907  |
| Q14624 | 0 | 1      | 1038.171 | 3112.497 | 3     | 0.00311  | 2.157008 |
| Q14624 | 0 | 0.88   | 503.9585 | 1509.861 | 1.35  | 0.00068  | 18.8935  |
| Q14624 | 0 | 0.96   | 755.4349 | 1509.862 | 2.37  | 0.00179  | 10.50709 |
| Q14624 | 0 | 0.6667 | 532.6275 | 1595.868 | 3.02  | 0.00161  | 45.69793 |
| Q14624 | 0 | 0.6176 | 532.6275 | 1595.868 | 3.02  | 0.00161  | 42.15372 |
| Q14624 | 0 | 1      | 778.8787 | 3112.493 | 1.6   | 0.00124  | 6.993337 |
| Q14624 | 1 | 1      | 906.5217 | 2717.551 | 0.97  | 0.00088  | 9.581242 |
| Q14624 | 0 | 1      | 913.1631 | 2737.475 | 0.26  | 0.00023  | 1.695897 |
| Q14624 | 0 | 1      | 685.124  | 2737.474 | 0.1   | 0.00007  | 4.204047 |
| Q14624 | 0 | 0.5357 | 532.6257 | 1595.863 | -0.31 | -0.00016 | 52.55064 |
| Q14624 | 0 | 1      | 777.1648 | 3105.637 | 1.18  | 0.00092  | 3.316844 |
| Q14624 | 0 | 0.8837 | 410.2107 | 1228.617 | 1.92  | 0.00079  | 0        |
| Q14624 | 0 | 1      | 1035.885 | 3105.64  | 2.19  | 0.00226  | 1.99959  |
| Q14624 | 0 | 1      | 1038.17  | 3112.495 | 2.17  | 0.00225  |          |
| Q14624 | 0 | 0.88   | 611.3773 | 1221.747 | 2.33  | 0.00142  | 4.914336 |
| Q14624 | 0 | 1      | 467.5689 | 1400.692 | 1.38  | 0.00064  | 52.34058 |
| Q14624 | 0 | 1      | 471.258  | 1411.759 | 1.58  | 0.00074  | 64.20599 |
| Q14624 | 0 | 0.8889 | 419.2746 | 1255.809 | 0.38  | 0.00016  | 70.10477 |
| Q14624 | 0 | 0.8611 | 498.2974 | 1492.878 | 3.39  | 0.00168  | 18.18522 |
| Q14624 | 0 | 1      | 471.2575 | 1411.758 | 0.47  | 0.00022  | 71.95668 |
| Q14624 | 0 | 0.8913 | 786.9399 | 1572.872 | 3.85  | 0.00303  | 2.118155 |



|        |   |        |          |          |       |          |          |
|--------|---|--------|----------|----------|-------|----------|----------|
| Q14624 | 0 | 1      | 521.7943 | 2084.155 | 1.45  | 0.00075  | 1.620498 |
| Q14624 | 0 | 1      | 421.8931 | 1263.665 | 1.72  | 0.00073  | 1.864329 |
| Q14624 | 0 | 0.7759 | 539.3256 | 1077.644 | 1.4   | 0.00076  | 8.271564 |
| Q14624 | 0 | 0.6316 | 487.2923 | 1459.862 | 0.91  | 0.00044  | 8.898244 |
| Q14624 | 0 | 0.8649 | 536.8107 | 1072.614 | 2.03  | 0.00109  | 22.02081 |
| Q14624 | 0 | 0.8611 | 498.2974 | 1492.878 | 3.39  | 0.00168  | 18.18522 |
| Q14624 | 0 | 0.9    | 503.9594 | 1509.864 | 3.17  | 0.00159  | 47.41573 |
| Q14624 | 0 | 0.8095 | 469.927  | 1407.767 | 1.3   | 0.00061  | 23.12851 |
| Q14624 | 0 | 1      | 546.3294 | 1636.974 | -0.59 | -0.00032 | 7.700274 |
| Q14624 | 0 | 0.8372 | 389.2219 | 1165.651 | 1.83  | 0.00071  | 4.971799 |
| Q14624 | 0 | 0.5263 | 595.6823 | 1785.032 | 1.9   | 0.00113  | 8.592519 |
| Q14624 | 0 | 0.9388 | 591.3278 | 1181.648 | 3.74  | 0.00221  | 6.210682 |
| Q14624 | 0 | 1      | 485.7694 | 1940.056 | 3.01  | 0.00146  | 35.91664 |
| Q14624 | 0 | 1      | 467.5691 | 1400.693 | 1.77  | 0.00083  | 10.19489 |
| Q14624 | 0 | 0.9677 | 509.2912 | 1525.859 | 3.37  | 0.00171  | 67.67847 |
| Q14624 | 0 | 0.8667 | 475.2587 | 1423.761 | 1.28  | 0.00061  | 5.333531 |
| Q14624 | 0 | 0.2353 | 439.2584 | 1315.761 | 1.21  | 0.00053  | 0        |
| Q14624 | 0 | 0.8491 | 509.2781 | 1017.549 | 1.31  | 0.00067  | 0        |
| Q14624 | 0 | 0.1935 | 458.2614 | 1372.77  | -0.73 | -0.00034 | 0        |
| Q14624 | 0 | 0.9024 | 716.9171 | 1432.827 | 1.39  | 0.001    | 6.125665 |
| Q14624 | 0 | 0.7949 | 755.4349 | 1509.863 | 2.45  | 0.00185  | 8.199357 |
| Q14624 | 0 | 0.8085 | 539.3254 | 1077.644 | 1.06  | 0.00057  | 25.46513 |
| Q14624 | 0 | 1      | 409.9997 | 1636.977 | 1.49  | 0.00061  | 21.0881  |
| Q14624 | 0 | 0.1333 | 498.2969 | 1492.876 | 2.4   | 0.0012   | 1.978593 |
| Q14624 | 0 | 0.6765 | 658.3835 | 1315.76  | 0.57  | 0.00037  | 8.755822 |
| Q14624 | 0 | 0.7619 | 652.6892 | 1956.053 | 0.54  | 0.00035  | 25.586   |
| Q14624 | 1 | 0.6818 | 397.9319 | 1191.781 | 2.18  | 0.00087  | 28.94779 |
| Q14624 | 0 | 0.6842 | 798.4371 | 1595.867 | 2.34  | 0.00187  | 4.637139 |
| Q14624 | 0 | 0.913  | 469.9271 | 1407.767 | 1.37  | 0.00064  | 9.625572 |
| Q14624 | 0 | 0.9    | 484.5925 | 1451.763 | 1.29  | 0.00062  | 64.89587 |
| Q14624 | 0 | 0.9032 | 394.5537 | 1181.646 | 2.18  | 0.00086  | 13.45693 |
| Q14624 | 0 | 1      | 582.8055 | 2328.2   | -0.1  | -0.00006 | 9.428074 |
| Q14624 | 1 | 1      | 416.5948 | 1247.77  | 1.87  | 0.00078  | 31.57208 |
| Q14624 | 0 | 1      | 485.7682 | 1940.051 | 0.49  | 0.00024  | 33.45097 |
| Q14624 | 0 | 0.8545 | 509.2785 | 1017.55  | 2.09  | 0.00106  | 0        |
| Q14624 | 0 | 0.6207 | 487.2925 | 1459.863 | 1.35  | 0.00066  | 12.06372 |
| Q14624 | 0 | 0.6364 | 668.4291 | 1335.851 | 1.51  | 0.00101  | 18.77147 |
| Q14624 | 0 | 0.75   | 419.2763 | 1255.814 | 4.24  | 0.00178  | 26.44579 |
| Q14624 | 0 | 0.898  | 536.8098 | 1072.612 | 0.44  | 0.00023  | 3.065197 |
| Q14624 | 0 | 0.7317 | 407.9203 | 1221.746 | 1.47  | 0.0006   | 7.850217 |
| Q14624 | 0 | 1      | 1280.146 | 2559.285 | 1.85  | 0.00236  | 0        |
| Q14624 | 0 | 0.8889 | 704.3878 | 1407.768 | 2.59  | 0.00182  | 18.75771 |
| Q14624 | 0 | 0.8039 | 509.2785 | 1017.55  | 2.09  | 0.00106  | 12.98051 |
| Q14624 | 0 | 1      | 503.958  | 1509.859 | 0.32  | 0.00016  | 13.33152 |
| Q14624 | 0 | 1      | 506.2963 | 1516.874 | 1.1   | 0.00056  | 10.1642  |
| Q14624 | 0 | 1      | 472.8998 | 1416.685 | -0.2  | -0.00009 | 66.51241 |
| Q14624 | 0 | 0.6818 | 387.8886 | 1161.651 | 1.47  | 0.00057  | 25.12229 |
| Q14624 | 0 | 1      | 379.9735 | 1516.872 | -0.24 | -0.00009 | 0        |
| Q14624 | 0 | 1      | 464.7592 | 928.511  | 1.31  | 0.00061  | 10.03007 |
| Q14624 | 0 | 0.8824 | 532.6263 | 1595.864 | 0.73  | 0.00039  | 25.12149 |
| Q14624 | 0 | 0.875  | 546.3307 | 1636.978 | 1.76  | 0.00096  | 27.2962  |
| Q14624 | 0 | 1      | 778.8787 | 3112.493 | 1.6   | 0.00124  | 46.57545 |

|            |   |        |          |          |       |          |          |
|------------|---|--------|----------|----------|-------|----------|----------|
| Q14624     | 0 | 0.6538 | 509.2899 | 1525.855 | 0.91  | 0.00046  | 25.1102  |
| Q14624     | 0 | 0.75   | 387.8888 | 1161.652 | 1.94  | 0.00075  | 12.4556  |
| Q14624     | 0 | 1      | 466.4466 | 2328.204 | 1.48  | 0.00069  | 0        |
| Q14624     | 0 | 0.8621 | 786.9371 | 1572.867 | 0.28  | 0.00022  | 6.71518  |
| Q14624     | 0 | 0.5385 | 387.8893 | 1161.653 | 3.12  | 0.00121  | 53.24963 |
| Q14624     | 0 | 1      | 536.8107 | 1072.614 | 2.14  | 0.00115  | 25.961   |
| Q14624     | 0 | 0.9167 | 532.6271 | 1595.867 | 2.22  | 0.00118  | 13.15745 |
| Q14624     | 0 | 1      | 417.6367 | 2084.154 | 1.12  | 0.00047  | 0        |
| Q14624     | 0 | 0.8182 | 685.0264 | 2053.065 | 1.02  | 0.0007   | 0        |
| Q14624     | 0 | 0.6944 | 565.8273 | 1130.647 | 2.28  | 0.00129  | 7.318781 |
| Q14624     | 0 | 1      | 419.5361 | 1256.594 | 4.43  | 0.00186  | 27.67778 |
| Q14624     | 0 | 1      | 467.5691 | 1400.693 | 1.83  | 0.00086  | 59.47414 |
| Q14624     | 0 | 0.7429 | 565.8274 | 1130.648 | 2.39  | 0.00135  | 24.7302  |
| Q14624     | 0 | 1      | 421.8933 | 1263.665 | 2.16  | 0.00091  | 25.3494  |
| Q14624     | 0 | 0.7333 | 658.3851 | 1315.763 | 2.98  | 0.00196  | 12.49684 |
| Q14624     | 0 | 0.72   | 445.9554 | 1335.852 | 1.96  | 0.00087  | 9.324774 |
| Q14624     | 1 | 0.1818 | 497.9888 | 1491.952 | 1.11  | 0.00055  | 0        |
| Q14624     | 0 | 1      | 410.0009 | 1636.982 | 4.32  | 0.00177  | 27.01279 |
| Q14624     | 0 | 0.7    | 503.9586 | 1509.861 | 1.59  | 0.0008   | 23.09921 |
| Q14624     | 0 | 1      | 464.7593 | 928.5112 | 1.5   | 0.0007   | 28.10948 |
| Q14624     | 0 | 1      | 410      | 1636.978 | 2.08  | 0.00085  | 28.79648 |
| Q14624     | 0 | 0.8857 | 536.813  | 1072.619 | 6.35  | 0.00341  | 28.34657 |
| Q14624     | 0 | 0.8636 | 679.6954 | 2037.072 | 1.98  | 0.00134  | 2.856497 |
| Q14624     | 0 | 0.9375 | 410.0002 | 1636.979 | 2.68  | 0.0011   | 28.45953 |
| Q14624     | 0 | 0.9268 | 556.3577 | 1111.708 | 1.14  | 0.00063  | 0        |
| Q14624     | 0 | 0.8125 | 469.9278 | 1407.769 | 2.93  | 0.00137  | 16.69924 |
| Q14624     | 0 | 1      | 475.2594 | 1423.764 | 2.76  | 0.00131  | 24.79189 |
| Q14624     | 0 | 1      | 472.8998 | 1416.685 | -0.26 | -0.00012 | 72.11679 |
| Q14624     | 0 | 1      | 409.9997 | 1636.977 | 1.34  | 0.00055  | 13.88865 |
| Q14624     | 0 | 0.7647 | 387.8888 | 1161.652 | 1.94  | 0.00075  | 42.12729 |
| Q14624     | 0 | 1      | 478.2814 | 1432.83  | 3.28  | 0.00157  | 46.48137 |
| Q14624     | 0 | 0.8049 | 509.2777 | 1017.548 | 0.53  | 0.00027  | 5.478704 |
| Q14624     | 0 | 1      | 472.9012 | 1416.689 | 2.78  | 0.00131  | 38.26564 |
| Q14624     | 0 | 0.6    | 419.2752 | 1255.811 | 1.69  | 0.00071  | 31.67081 |
| Q14624     | 0 | 1      | 419.2753 | 1255.811 | 2.06  | 0.00086  | 40.696   |
| Q14624     | 0 | 0.9333 | 581.3295 | 1161.652 | 1.71  | 0.001    | 24.69508 |
| Q14624     | 0 | 0.4286 | 532.6259 | 1595.863 | -0.08 | -0.00004 | 21.58272 |
| Q14624     | 0 | 1      | 472.9008 | 1416.688 | 1.94  | 0.00091  | 55.13436 |
| Q14624     | 0 | 1      | 475.2595 | 1423.764 | 3.01  | 0.00143  | 0        |
| Q14624     | 0 | 0.4286 | 524.9604 | 1572.867 | 0.12  | 0.00006  | 0        |
| Q14624     | 0 | 1      | 475.2595 | 1423.764 | 3.01  | 0.00143  | 32.8395  |
| Q14624     | 0 | 1      | 498.2966 | 1492.875 | 1.85  | 0.00092  | 46.3236  |
| Q14624     | 0 | 0.875  | 387.8884 | 1161.651 | 0.91  | 0.00035  | 46.10957 |
| Q14624     | 0 | 1      | 419.5352 | 1256.591 | 2.32  | 0.00097  | 10.86871 |
| Q14624     | 0 | 1      | 509.2792 | 1017.551 | 3.47  | 0.00176  | 9.521961 |
| Q14624     | 0 | 0.8571 | 978.5327 | 1956.058 | 3.23  | 0.00316  | 2.977613 |
| Q14624     | 0 | 0.8077 | 726.3837 | 1451.76  | -0.7  | -0.00051 | 0        |
| Q14624     | 0 | 0.9259 | 611.3779 | 1221.748 | 3.23  | 0.00197  | 5.10031  |
| Q14624     | 0 | 1      | 536.8119 | 1072.617 | 4.3   | 0.00231  | 17.07041 |
| P08603; QC | 0 | 0.971  | 755.3972 | 1509.787 | 1.31  | 0.00099  | 3.569047 |
| P08603; QC | 0 | 1      | 503.9338 | 1509.787 | 1.18  | 0.0006   | 3.008636 |
| P08603     | 0 | 0.9024 | 562.0018 | 1683.991 | 1.44  | 0.00081  | 0        |

|            |   |        |          |          |       |          |          |
|------------|---|--------|----------|----------|-------|----------|----------|
| P08603     | 0 | 0.9655 | 562.0021 | 1683.992 | 1.98  | 0.00111  | 7.975345 |
| P08603     | 0 | 1      | 562.0022 | 1683.992 | 2.2   | 0.00124  | 8.347581 |
| P08603     | 0 | 1      | 842.4987 | 1683.99  | 1.01  | 0.00085  | 3.816402 |
| P08603     | 0 | 1      | 562.0022 | 1683.992 | 2.2   | 0.00124  | 9.283036 |
| P08603     | 0 | 1      | 611.9676 | 1833.888 | 0.89  | 0.00054  | 8.704879 |
| P08603     | 0 | 0.925  | 467.2519 | 1399.741 | 1.19  | 0.00056  | 37.38911 |
| P08603     | 0 | 0.9123 | 700.3748 | 1399.742 | 1.99  | 0.00139  | 4.915659 |
| P08603     | 0 | 0.8387 | 467.2518 | 1399.741 | 1     | 0.00047  | 33.73383 |
| P08603     | 0 | 0.9722 | 467.2519 | 1399.741 | 1.13  | 0.00053  | 7.840226 |
| P08603     | 0 | 0.9783 | 723.369  | 2890.454 | 6.7   | 0.00484  | 14.22767 |
| P08603     | 0 | 0.975  | 964.1514 | 2890.44  | 1.62  | 0.00156  | 4.037967 |
| P08603     | 0 | 0.8846 | 964.1523 | 2890.442 | 2.63  | 0.00253  | 0        |
| P08603     | 0 | 1      | 813.7198 | 2439.145 | 1.55  | 0.00126  | 4.398508 |
| P08603     | 0 | 1      | 813.7191 | 2439.143 | 0.73  | 0.00059  | 67.18699 |
| P08603     | 0 | 1      | 623.307  | 1245.607 | 1.72  | 0.00107  | 0        |
| P08603     | 0 | 1      | 604.3511 | 1207.695 | 2.87  | 0.00173  | 8.337082 |
| P08603     | 0 | 1      | 403.2355 | 1207.692 | 0.43  | 0.00017  | 9.428444 |
| P08603     | 0 | 0.9333 | 454.7475 | 1815.968 | 0.82  | 0.00037  | 9.918261 |
| P08603     | 0 | 0.9538 | 605.9952 | 1815.971 | 2.54  | 0.00154  | 7.482445 |
| P08603     | 0 | 0.7333 | 454.7476 | 1815.969 | 1.16  | 0.00052  | 0        |
| P08603     | 0 | 1      | 900.7938 | 2700.367 | 7.58  | 0.00682  | 31.01655 |
| P08603     | 0 | 1      | 900.7893 | 2700.353 | 2.56  | 0.00231  | 4.1572   |
| P08603     | 0 | 1      | 675.8434 | 2700.352 | 2.11  | 0.00142  | 2.242074 |
| P08603     | 0 | 1      | 900.7889 | 2700.352 | 2.22  | 0.002    | 3.391243 |
| P08603     | 1 | 1      | 524.3164 | 1570.935 | 2.49  | 0.0013   | 8.697868 |
| P08603     | 1 | 1      | 524.3164 | 1570.934 | 2.37  | 0.00124  | 23.56487 |
| P08603     | 1 | 0.5758 | 393.4884 | 1570.932 | 0.73  | 0.00029  | 7.132245 |
| Q02985; PC | 0 | 0.7879 | 474.622  | 1421.851 | 0.47  | 0.00022  | 9.169104 |
| Q02985; PC | 0 | 0.7391 | 474.6225 | 1421.853 | 1.5   | 0.00071  | 24.49958 |
| Q02985; PC | 0 | 0.8868 | 711.4302 | 1421.853 | 1.66  | 0.00118  | 7.879076 |
| Q02985; PC | 0 | 0.7273 | 474.6222 | 1421.852 | 0.92  | 0.00044  | 15.33165 |
| P08603     | 0 | 0.8235 | 467.2524 | 1399.743 | 2.37  | 0.00111  | 0        |
| P08603     | 0 | 0.8723 | 516.6213 | 1547.849 | -0.08 | -0.00004 | 7.515931 |
| P08603     | 0 | 0.8308 | 774.4289 | 1547.851 | 0.72  | 0.00056  | 6.97052  |
| P08603     | 0 | 0.8966 | 516.622  | 1547.851 | 1.22  | 0.00063  | 6.515483 |
| P08603     | 0 | 1      | 727.3569 | 1453.707 | 1.22  | 0.00089  | 20.25361 |
| P08603     | 0 | 1      | 463.9081 | 1389.71  | 2.27  | 0.00105  | 12.01466 |
| P08603     | 0 | 1      | 695.3585 | 1389.71  | 2.24  | 0.00156  | 4.24159  |
| P08603     | 0 | 0.4468 | 766.3857 | 2297.143 | 1.35  | 0.00104  | 5.645868 |
| P08603     | 0 | 1      | 769.714  | 2307.127 | 3.39  | 0.00261  | 2.674431 |
| P08603     | 0 | 1      | 777.3351 | 2329.991 | -1.49 | -0.00116 | 13.0928  |
| P08603     | 0 | 1      | 725.6581 | 2174.96  | 1.26  | 0.00092  | 8.744031 |
| P08603     | 0 | 1      | 617.2983 | 2466.171 | 3.3   | 0.00203  | 63.56646 |
| P08603     | 0 | 0.9355 | 822.7285 | 2466.171 | 3.1   | 0.00255  | 13.01577 |
| P08603     | 0 | 0.9583 | 654.3518 | 2614.385 | 4.99  | 0.00326  | 15.28613 |
| P08603     | 1 | 1      | 637.8068 | 2548.205 | 1.5   | 0.00095  | 8.906884 |
| P08603     | 0 | 0.8846 | 453.2239 | 1357.657 | 1.48  | 0.00067  | 41.73682 |
| P08603     | 0 | 0.9362 | 481.919  | 1443.742 | 2.28  | 0.0011   | 12.34117 |
| P08603     | 0 | 0.9    | 722.3746 | 1443.742 | 1.86  | 0.00135  | 6.220034 |
| P08603     | 1 | 1      | 637.8069 | 2548.206 | 1.59  | 0.00102  | 5.408194 |
| P08603     | 0 | 0.8684 | 517.6019 | 1550.791 | 2.27  | 0.00118  | 11.88309 |
| P08603     | 0 | 1      | 775.8986 | 1550.79  | 1.5   | 0.00116  | 30.11355 |

|            |   |        |          |          |       |          |          |
|------------|---|--------|----------|----------|-------|----------|----------|
| P08603     | 0 | 1      | 648.3215 | 1942.95  | 2.15  | 0.00139  | 27.1526  |
| P08603     | 0 | 1      | 621.7763 | 1242.545 | 2.74  | 0.0017   | 33.03737 |
| P08603     | 0 | 1      | 621.7763 | 1242.545 | 2.65  | 0.00164  | 38.68909 |
| P08603     | 0 | 1      | 693.8264 | 1386.645 | 1.04  | 0.00072  | 3.189405 |
| P08603     | 0 | 1      | 693.8268 | 1386.646 | 1.75  | 0.00121  | 3.335537 |
| P08603     | 0 | 1      | 741.8763 | 1482.745 | 1.84  | 0.00136  | 0        |
| P08603     | 0 | 1      | 494.9194 | 1482.744 | 0.66  | 0.00032  | 8.316276 |
| P08603     | 0 | 0.975  | 702.0218 | 2104.051 | 1.79  | 0.00126  | 4.786982 |
| P08603     | 0 | 1      | 822.7271 | 2466.167 | 1.4   | 0.00115  | 5.072587 |
| P08603     | 0 | 1      | 494.9195 | 1482.744 | 0.9   | 0.00045  | 31.73177 |
| P08603     | 0 | 1      | 722.368  | 2165.09  | 5.47  | 0.00395  | 20.86158 |
| P08603     | 0 | 1      | 494.9208 | 1482.748 | 3.37  | 0.00167  | 26.46812 |
| P08603     | 0 | 0.7308 | 675.8431 | 2700.351 | 1.65  | 0.00112  | 4.018898 |
| P08603     | 0 | 1      | 650.3234 | 1299.64  | 1.89  | 0.00123  | 37.06493 |
| P08603     | 0 | 1      | 623.3316 | 1245.656 | 4.26  | 0.00266  | 15.46071 |
| P08603     | 0 | 1      | 494.9205 | 1482.747 | 2.82  | 0.00139  | 19.47134 |
| P08603     | 0 | 0.9667 | 648.0106 | 1942.017 | 1.71  | 0.00111  | 10.5841  |
| P08603     | 0 | 1      | 667.321  | 1333.635 | 1.59  | 0.00106  | 3.304256 |
| P08603     | 0 | 0.875  | 436.902  | 1308.692 | 2.39  | 0.00104  | 69.20187 |
| P08603     | 0 | 0.9697 | 462.8868 | 1386.646 | 1.3   | 0.0006   | 9.885628 |
| P08603; QC | 0 | 1      | 683.3453 | 1365.683 | 0.21  | 0.00014  | 12.80095 |
| P08603     | 0 | 1      | 552.7719 | 1104.536 | 0.94  | 0.00052  | 20.77806 |
| P08603     | 0 | 0.8182 | 702.0217 | 2104.051 | 1.7   | 0.0012   | 24.7922  |
| P08603     | 0 | 0.8857 | 467.2535 | 1399.746 | 4.73  | 0.00221  | 0        |
| P08603     | 0 | 1      | 741.8782 | 1482.749 | 4.31  | 0.00319  | 0        |
| P08603     | 0 | 0.9375 | 675.8435 | 2700.352 | 2.2   | 0.00148  | 70.66231 |
| P08603     | 0 | 1      | 631.8281 | 1262.649 | 3.82  | 0.00241  | 22.99215 |
| P08603     | 0 | 0.5714 | 467.2525 | 1399.743 | 2.5   | 0.00117  | 11.81219 |
| P08603     | 0 | 1      | 624.8234 | 1248.64  | 1.7   | 0.00106  | 8.022172 |
| P08603     | 0 | 0.963  | 623.3304 | 1245.654 | 2.4   | 0.0015   | 6.733574 |
| P08603     | 0 | 1      | 486.2596 | 1942.016 | 1.33  | 0.00064  | 27.70929 |
| P08603     | 0 | 0.75   | 648.3214 | 1942.95  | 1.86  | 0.00121  | 4.978912 |
| P08603     | 0 | 1      | 595.2709 | 1189.535 | 3.33  | 0.00198  | 48.93077 |
| P08603     | 0 | 1      | 425.8789 | 1275.622 | 1.76  | 0.00075  | 43.38062 |
| P08603     | 0 | 0.8537 | 604.3533 | 1207.699 | 6.51  | 0.00393  | 33.56851 |
| P08603     | 0 | 0.9688 | 431.5703 | 1292.696 | 2.07  | 0.00089  | 8.20663  |
| P08603     | 1 | 0.875  | 476.2829 | 1426.834 | 3.82  | 0.00182  | 28.02704 |
| P08603     | 1 | 0.875  | 476.2829 | 1426.834 | 3.82  | 0.00182  | 28.02704 |
| P08603     | 0 | 1      | 485.2408 | 1453.708 | 2.05  | 0.00099  | 18.50875 |
| P08603     | 0 | 1      | 445.2164 | 1333.635 | 1.53  | 0.00068  | 22.57742 |
| P08603     | 0 | 1      | 421.5528 | 1262.644 | -0.18 | -0.00008 | 53.92863 |
| P08603     | 0 | 1      | 725.6587 | 2174.962 | 2.1   | 0.00153  | 0        |
| P08603     | 0 | 1      | 431.5708 | 1292.698 | 3.35  | 0.00144  | 7.344255 |
| P08603     | 0 | 1      | 617.2975 | 2466.168 | 2.01  | 0.00124  | 20.14208 |
| P08603     | 0 | 0.8333 | 964.1525 | 2890.443 | 2.76  | 0.00266  | 0        |
| P08603     | 0 | 0.875  | 481.9184 | 1443.741 | 1.07  | 0.00052  | 4.692261 |
| P08603     | 0 | 1      | 458.5552 | 1373.651 | 0.79  | 0.00036  | 6.832651 |
| P08603     | 0 | 1      | 425.8791 | 1275.623 | 2.19  | 0.00093  | 35.40481 |
| P08603; QC | 0 | 0.9231 | 509.265  | 1525.78  | 0.14  | 0.00007  | 0        |
| P08603; QC | 0 | 1      | 429.2259 | 1285.663 | 0.51  | 0.00022  | 17.08717 |
| P08603     | 0 | 1      | 900.7936 | 2700.366 | 7.44  | 0.0067   | 8.963806 |
| P08603     | 0 | 1      | 723.3629 | 2890.43  | -1.75 | -0.00126 | 30.87895 |

|            |   |        |          |          |       |          |          |
|------------|---|--------|----------|----------|-------|----------|----------|
| P08603     | 0 | 0.9583 | 559.7771 | 1118.547 | 4.32  | 0.00242  | 0        |
| P08603     | 1 | 0.625  | 584.7961 | 2336.163 | 2.3   | 0.00134  | 4.327932 |
| P08603     | 0 | 0.8293 | 592.3087 | 1183.61  | 4.08  | 0.00241  | 39.06714 |
| P08603     | 0 | 0.7    | 824.0966 | 2470.275 | 1.95  | 0.00161  | 15.4316  |
| P08603     | 0 | 1      | 669.8248 | 1338.642 | 1.23  | 0.00082  | 0        |
| P08603     | 0 | 0.4211 | 654.3507 | 2614.381 | 3.31  | 0.00216  | 9.29794  |
| P08603     | 1 | 1      | 785.9705 | 1570.934 | 1.84  | 0.00144  | 6.003601 |
| P08603     | 0 | 1      | 393.2052 | 1177.601 | -0.53 | -0.00021 | 5.701189 |
| P08603     | 0 | 1      | 393.2057 | 1177.603 | 0.79  | 0.00031  | 10.25868 |
| P08603     | 0 | 1      | 621.7745 | 1242.542 | -0.11 | -0.00007 | 0        |
| P08603     | 0 | 0.7778 | 611.9677 | 1833.888 | 0.99  | 0.0006   | 11.38106 |
| P08603     | 0 | 1      | 458.5556 | 1373.652 | 1.65  | 0.00076  | 65.87532 |
| P08603     | 0 | 1      | 1220.076 | 2439.146 | 1.86  | 0.00227  | 0        |
| P08603     | 0 | 1      | 675.8447 | 2700.357 | 4     | 0.0027   | 0        |
| P08603     | 1 | 1      | 637.8087 | 2548.213 | 4.37  | 0.00279  | 22.67767 |
| P08603; QC | 0 | 0.5    | 755.398  | 1509.789 | 2.28  | 0.00172  | 9.689037 |
| P08603     | 0 | 0.6923 | 562.0028 | 1683.994 | 3.29  | 0.00185  | 18.94243 |
| P08603     | 0 | 0.5882 | 421.752  | 1683.986 | -1.18 | -0.0005  | 66.43376 |
| P02787     | 0 | 1      | 622.6262 | 1865.864 | 1.23  | 0.00077  | 0        |
| P02787     | 0 | 1      | 622.6264 | 1865.865 | 1.53  | 0.00095  | 9.504395 |
| P02787     | 0 | 1      | 933.4363 | 1865.865 | 1.93  | 0.0018   | 10.24657 |
| P02787     | 0 | 1      | 447.2203 | 1339.646 | 1.39  | 0.00062  | 24.02737 |
| P02787     | 0 | 1      | 561.9439 | 1683.817 | 2.46  | 0.00138  | 6.094108 |
| P02787     | 0 | 1      | 749.8709 | 1498.735 | 1.16  | 0.00087  | 2.453113 |
| P02787     | 1 | 1      | 543.288  | 1627.849 | 1.78  | 0.00097  | 21.66813 |
| P02787     | 0 | 1      | 447.2205 | 1339.647 | 1.73  | 0.00077  | 35.3155  |
| P02787     | 0 | 1      | 459.243  | 1833.95  | -0.57 | -0.00026 | 5.927568 |
| P02787     | 1 | 1      | 537.9562 | 1611.854 | 1.52  | 0.00082  | 40.39764 |
| P02787     | 0 | 1      | 391.2204 | 1561.86  | 1.35  | 0.00053  | 65.95879 |
| P02787     | 0 | 1      | 521.2916 | 1561.86  | 1.71  | 0.00089  | 24.66203 |
| P02787     | 0 | 0.8837 | 541.6174 | 1622.838 | 0.42  | 0.00023  | 37.237   |
| P02787     | 0 | 1      | 811.9231 | 1622.839 | 1.26  | 0.00102  | 3.137086 |
| P02787     | 0 | 1      | 559.2696 | 1675.794 | 2.52  | 0.00141  | 15.28788 |
| P02787     | 0 | 0.95   | 522.2847 | 1564.839 | 2.08  | 0.00109  | 6.832556 |
| P02787     | 0 | 0.9024 | 522.2844 | 1564.839 | 1.5   | 0.00078  | 14.73976 |
| P02787     | 0 | 0.9615 | 521.2916 | 1561.86  | 1.71  | 0.00089  | 8.501781 |
| P02787     | 0 | 0.8393 | 640.0125 | 1918.023 | 1.54  | 0.00099  | 25.1615  |
| P02787     | 0 | 0.8594 | 640.0125 | 1918.023 | 1.54  | 0.00099  | 4.99184  |
| P02787     | 0 | 0.88   | 523.5927 | 1568.763 | 1.08  | 0.00057  | 12.22315 |
| P02787     | 0 | 0.8444 | 605.3244 | 1209.642 | 2.31  | 0.0014   | 31.93626 |
| P02787     | 0 | 1      | 535.9366 | 1605.795 | 1.16  | 0.00062  | 19.7394  |
| P02787     | 0 | 0.9268 | 622.678  | 1866.019 | 0.43  | 0.00027  | 5.828174 |
| P02787     | 0 | 0.9846 | 622.6789 | 1866.022 | 1.9   | 0.00118  | 8.714314 |
| P02787     | 0 | 0.9556 | 633.8505 | 1266.694 | 0.35  | 0.00022  | 33.82518 |
| P02787     | 0 | 0.8113 | 644.8563 | 1288.705 | 1.97  | 0.00127  | 4.36728  |
| P02787     | 1 | 1      | 675.9985 | 2025.981 | 1.41  | 0.00095  | 2.664398 |
| P02787     | 0 | 0.7838 | 590.3154 | 2358.24  | 2.83  | 0.00167  | 4.696531 |
| P02787     | 1 | 1      | 675.9993 | 2025.983 | 2.58  | 0.00175  | 23.73982 |
| P02787     | 0 | 1      | 568.6486 | 1703.931 | 4.17  | 0.00237  | 23.50902 |
| P02787     | 0 | 1      | 714.3408 | 1427.674 | 2.22  | 0.00159  | 7.965966 |
| P02787     | 0 | 0.7255 | 513.2756 | 1537.812 | 1.51  | 0.00077  | 8.013424 |
| P02787     | 0 | 0.9481 | 769.4105 | 1537.814 | 2.35  | 0.00181  | 13.05946 |

|        |   |        |          |          |       |          |          |
|--------|---|--------|----------|----------|-------|----------|----------|
| P02787 | 0 | 0.9815 | 469.5011 | 1874.983 | 2.23  | 0.00104  | 43.21069 |
| P02787 | 0 | 1      | 459.2439 | 1833.954 | 1.43  | 0.00066  | 7.96967  |
| P02787 | 0 | 1      | 459.2437 | 1833.953 | 1.1   | 0.0005   | 5.796868 |
| P02787 | 0 | 1      | 535.9371 | 1605.797 | 2.07  | 0.00111  | 27.5948  |
| P02787 | 0 | 1      | 469.5011 | 1874.982 | 2.1   | 0.00098  | 18.22964 |
| P02787 | 0 | 1      | 469.5011 | 1874.982 | 2.1   | 0.00098  | 12.0648  |
| P02787 | 0 | 1      | 563.2846 | 2250.116 | 2.55  | 0.00143  | 10.58652 |
| P02787 | 0 | 1      | 750.7097 | 2250.115 | 1.77  | 0.00133  | 6.019434 |
| P02787 | 0 | 1      | 750.7096 | 2250.114 | 1.61  | 0.00121  | 16.18424 |
| P02787 | 0 | 1      | 563.2839 | 2250.114 | 1.47  | 0.00082  | 9.478635 |
| P02787 | 0 | 1      | 750.7094 | 2250.114 | 1.28  | 0.00096  | 4.737927 |
| P02787 | 0 | 1      | 563.2847 | 2250.117 | 2.88  | 0.00162  | 5.629054 |
| P02787 | 0 | 1      | 750.7093 | 2250.113 | 1.2   | 0.0009   | 10.09671 |
| P02787 | 0 | 0.8837 | 581.8284 | 1162.65  | 3.2   | 0.00186  | 11.71037 |
| P02787 | 0 | 1      | 563.2846 | 2250.116 | 2.55  | 0.00143  | 7.735673 |
| P02787 | 0 | 1      | 750.7092 | 2250.113 | 1.04  | 0.00078  | 5.89638  |
| P02787 | 0 | 1      | 563.2847 | 2250.117 | 2.88  | 0.00162  | 9.054694 |
| P02787 | 0 | 1      | 772.4049 | 2315.2   | 1.1   | 0.00085  | 1.781895 |
| P02787 | 0 | 1      | 1158.104 | 2315.202 | 1.84  | 0.00213  | 0        |
| P02787 | 0 | 1      | 563.2844 | 2250.116 | 2.33  | 0.00131  | 7.555831 |
| P02787 | 0 | 1      | 485.6028 | 1454.794 | -1.03 | -0.0005  | 4.329264 |
| P02787 | 0 | 1      | 459.2431 | 1833.95  | -0.3  | -0.00014 | 22.65432 |
| P02787 | 0 | 1      | 563.2847 | 2250.117 | 2.77  | 0.00156  | 4.853487 |
| P02787 | 0 | 0.9697 | 750.7097 | 2250.114 | 1.69  | 0.00127  | 6.579433 |
| P02787 | 0 | 1      | 485.6036 | 1454.796 | 0.61  | 0.00029  | 4.794394 |
| P02787 | 0 | 1      | 750.7091 | 2250.113 | 0.96  | 0.00072  | 9.400943 |
| P02787 | 1 | 1      | 473.5981 | 1418.78  | 0.72  | 0.00034  | 33.83379 |
| P02787 | 0 | 0.9388 | 727.902  | 1454.797 | 0.97  | 0.00071  | 0        |
| P02787 | 0 | 1      | 670.325  | 1339.643 | -1.47 | -0.00099 | 15.96091 |
| P02787 | 0 | 1      | 622.6259 | 1865.863 | 0.74  | 0.00046  | 5.040756 |
| P02787 | 0 | 1      | 399.1865 | 1195.545 | 2     | 0.0008   | 35.61543 |
| P02787 | 0 | 1      | 670.3281 | 1339.649 | 3.17  | 0.00213  | 3.322643 |
| P02787 | 0 | 0.9091 | 571.2951 | 1141.583 | 3.27  | 0.00186  | 4.460028 |
| P02787 | 0 | 1      | 485.6043 | 1454.798 | 1.99  | 0.00097  | 6.109419 |
| P02787 | 0 | 0.84   | 554.8221 | 1108.637 | 2.29  | 0.00127  | 0        |
| P02787 | 0 | 1      | 485.6043 | 1454.798 | 1.99  | 0.00097  | 36.76691 |
| P02787 | 0 | 0.9444 | 521.2915 | 1561.86  | 1.48  | 0.00077  | 10.30852 |
| P02787 | 0 | 0.093  | 516.2631 | 1031.519 | 1.64  | 0.00085  | 3.208266 |
| P02787 | 0 | 0.9787 | 770.3615 | 1539.716 | 3.22  | 0.00248  | 0        |
| P02787 | 0 | 1      | 402.2049 | 1605.798 | 2.82  | 0.00113  | 30.23007 |
| P02787 | 0 | 0.9355 | 852.4713 | 1703.935 | 6.65  | 0.00567  | 0        |
| P02787 | 0 | 0.8478 | 605.3264 | 1209.645 | 5.54  | 0.00335  | 0        |
| P02787 | 1 | 0.92   | 423.9119 | 1269.721 | 1.08  | 0.00046  | 27.91417 |
| P02787 | 0 | 1      | 485.6035 | 1454.796 | 0.42  | 0.0002   | 35.38224 |
| P02787 | 0 | 1      | 473.2582 | 1417.76  | 3.03  | 0.00143  | 42.02169 |
| P02787 | 1 | 1      | 604.0092 | 1810.013 | 3.34  | 0.00201  | 16.17004 |
| P02787 | 0 | 0.8649 | 561.7996 | 1122.592 | 0.62  | 0.00035  | 0        |
| P02787 | 0 | 0.8889 | 430.2397 | 1288.705 | 1.46  | 0.00063  | 6.041776 |
| P02787 | 0 | 1      | 391.9646 | 1564.837 | 0.32  | 0.00013  | 32.35226 |
| P02787 | 1 | 1      | 471.9307 | 1413.778 | 0.98  | 0.00046  | 8.847574 |
| P02787 | 0 | 0.8421 | 605.3257 | 1209.644 | 4.43  | 0.00268  | 0        |
| P02787 | 0 | 0.75   | 671.9962 | 2013.974 | 1.39  | 0.00094  | 11.34497 |

|        |   |        |          |          |       |          |          |
|--------|---|--------|----------|----------|-------|----------|----------|
| P02787 | 0 | 0.8788 | 605.3242 | 1209.641 | 1.9   | 0.00115  | 1.507185 |
| P02787 | 0 | 0.9032 | 739.871  | 1478.735 | -0.1  | -0.00007 | 21.13222 |
| P02787 | 0 | 1      | 512.3088 | 1023.61  | 2.53  | 0.00129  | 36.36041 |
| P02787 | 0 | 0.9333 | 677.82   | 1354.633 | 1.38  | 0.00094  | 8.539092 |
| P02787 | 0 | 1      | 533.2728 | 1065.538 | 1.49  | 0.00079  | 0        |
| P02787 | 0 | 0.9091 | 541.6179 | 1622.839 | 1.32  | 0.00072  | 14.47225 |
| P02787 | 0 | 0.6667 | 447.2231 | 1339.655 | 0.29  | 0.00013  | 5.948778 |
| P02787 | 0 | 0.9706 | 512.3091 | 1023.611 | 3.12  | 0.0016   | 21.13083 |
| P02787 | 0 | 0.9524 | 671.9953 | 2013.971 | 0.12  | 0.00008  | 0        |
| P02787 | 0 | 0.9375 | 485.6043 | 1454.798 | 2.05  | 0.001    | 44.97449 |
| P02787 | 0 | 1      | 521.2938 | 1561.867 | 5.81  | 0.00303  | 17.00948 |
| P02787 | 1 | 0.913  | 675.9959 | 2025.973 | -2.39 | -0.00161 | 22.10481 |
| P02787 | 0 | 0.8261 | 702.676  | 2106.013 | 2.27  | 0.0016   | 5.847476 |
| P02787 | 0 | 1      | 512.3081 | 1023.609 | 1.21  | 0.00062  | 55.06925 |
| P02787 | 0 | 0.8333 | 535.9362 | 1605.794 | 0.48  | 0.00025  | 78.04005 |
| P02787 | 0 | 0.3333 | 422.9039 | 1266.697 | 3.18  | 0.00134  | 62.54387 |
| P02751 | 0 | 0.8684 | 686.3742 | 2057.108 | 4.07  | 0.00279  | 5.326117 |
| P02751 | 0 | 0.9    | 700.3784 | 2099.121 | 4.98  | 0.00348  | 10.42075 |
| P02751 | 0 | 0.6667 | 527.6313 | 1580.879 | 1.22  | 0.00064  | 9.309264 |
| P02751 | 0 | 1      | 535.9699 | 1605.895 | 1.36  | 0.00073  | 38.33139 |
| P02751 | 0 | 0.7679 | 802.4449 | 2405.32  | 0.05  | 0.00004  | 5.803614 |
| P02751 | 0 | 0.907  | 525.9559 | 1575.853 | 1.28  | 0.00067  | 8.228604 |
| P02751 | 0 | 0.9737 | 525.9561 | 1575.854 | 1.63  | 0.00086  | 21.18682 |
| P02751 | 0 | 0.7308 | 750.4022 | 1499.797 | -0.19 | -0.00014 | 12.56848 |
| P02751 | 0 | 1      | 880.0772 | 2638.217 | -0.35 | -0.00031 | 86.89754 |
| P02751 | 0 | 1      | 827.3877 | 2480.149 | 2.08  | 0.00172  | 6.165277 |
| P02751 | 0 | 1      | 847.4017 | 2540.191 | 0.96  | 0.00081  | 9.204536 |
| P02751 | 0 | 1      | 797.4309 | 3186.702 | 3.14  | 0.00251  | 36.04278 |
| P02751 | 0 | 0.9118 | 588.6808 | 1764.028 | 2.89  | 0.0017   | 15.90574 |
| P02751 | 0 | 0.9655 | 829.049  | 2485.132 | 1.24  | 0.00103  | 4.690374 |
| P02751 | 0 | 0.8824 | 651.3449 | 1952.02  | 6.76  | 0.0044   | 22.98104 |
| P02751 | 0 | 1      | 622.0371 | 2485.126 | -1.15 | -0.00071 | 18.22258 |
| P02751 | 0 | 1      | 619.2675 | 1855.788 | 2.74  | 0.0017   | 14.78157 |
| P02751 | 0 | 1      | 515.9291 | 1545.773 | 3.22  | 0.00166  | 0        |
| P02751 | 0 | 0.975  | 456.2575 | 1366.758 | 0.87  | 0.00039  | 33.47849 |
| P02751 | 0 | 0.8235 | 521.9442 | 1563.818 | 1.47  | 0.00077  | 6.625615 |
| P02751 | 0 | 1      | 686.3699 | 2057.095 | -2.16 | -0.00148 | 21.71024 |
| P02751 | 0 | 1      | 627.3427 | 1880.014 | 1.06  | 0.00067  | 17.1145  |
| P02751 | 0 | 0.9524 | 451.8868 | 1353.646 | -0.05 | -0.00002 | 64.70397 |
| P02751 | 0 | 0.8444 | 522.8189 | 1044.631 | 1.33  | 0.00069  | 15.40846 |
| P02751 | 0 | 1      | 893.3959 | 1785.785 | 0.4   | 0.00036  | 0        |
| P02751 | 0 | 0.9714 | 819.4238 | 2456.257 | 0.9   | 0.00073  | 9.832249 |
| P02751 | 0 | 0.9211 | 453.9307 | 1359.778 | 0.97  | 0.00044  | 51.20701 |
| P02751 | 0 | 0.9375 | 584.3232 | 1750.955 | 1.71  | 0.001    | 39.0821  |
| P02751 | 0 | 0.9688 | 761.4058 | 2282.203 | 3.52  | 0.00268  | 40.41438 |
| P02751 | 0 | 0.963  | 599.3019 | 1795.891 | 3.26  | 0.00195  | 2.837538 |
| P02751 | 0 | 1      | 522.8188 | 1044.63  | 1.09  | 0.00057  | 21.77069 |
| P02751 | 0 | 1      | 440.2506 | 1318.737 | 1.09  | 0.00048  | 18.58456 |
| P02751 | 0 | 1      | 847.4052 | 2540.201 | 4.99  | 0.00423  | 10.75723 |
| P02751 | 0 | 0.9167 | 539.7941 | 1078.581 | 1.34  | 0.00072  | 4.141369 |
| P02751 | 0 | 0.9545 | 690.388  | 2758.53  | 2.63  | 0.00182  | 21.19614 |
| P02751 | 0 | 1      | 470.7596 | 1880.017 | 2.68  | 0.00126  | 4.804381 |

|        |   |        |          |          |       |          |          |
|--------|---|--------|----------|----------|-------|----------|----------|
| P02751 | 0 | 0.9091 | 438.4943 | 1750.955 | 1.73  | 0.00076  | 35.49263 |
| P02751 | 0 | 0.9333 | 576.2799 | 1151.552 | 0.91  | 0.00052  | 26.79073 |
| P02751 | 0 | 1      | 508.7927 | 1016.578 | 2.36  | 0.0012   | 16.47688 |
| P02751 | 0 | 1      | 624.3151 | 1870.931 | 3.76  | 0.00234  | 23.51587 |
| P02751 | 0 | 1      | 625.627  | 1874.866 | 4.46  | 0.00279  | 11.34726 |
| P02751 | 0 | 1      | 677.3266 | 1353.646 | -0.02 | -0.00001 | 0        |
| P02751 | 0 | 1      | 624.3136 | 1870.926 | 1.31  | 0.00082  | 75.56871 |
| P02751 | 0 | 1      | 500.605  | 1499.8   | 1.96  | 0.00098  | 5.081048 |
| P02751 | 0 | 1      | 508.7925 | 1016.578 | 2     | 0.00102  | 14.37678 |
| P02751 | 1 | 1      | 632.6921 | 1896.062 | 1.87  | 0.00118  | 38.25325 |
| P02751 | 0 | 0.9062 | 627.8275 | 1254.648 | 2.48  | 0.00156  | 0        |
| P02751 | 0 | 0.8333 | 614.8196 | 2456.257 | 0.82  | 0.0005   | 12.91154 |
| P02751 | 0 | 0.5185 | 790.9413 | 1580.875 | -1.32 | -0.00105 | 61.37672 |
| P02751 | 0 | 0.8333 | 515.9277 | 1545.769 | 0.49  | 0.00025  | 20.01289 |
| P02751 | 0 | 0.5    | 802.4456 | 2405.322 | 0.97  | 0.00078  | 0        |
| P02751 | 0 | 0.7805 | 467.7429 | 934.4786 | 1.16  | 0.00054  | 13.37445 |
| P02751 | 0 | 0.5217 | 540.6455 | 1619.922 | 0.82  | 0.00044  | 11.20854 |
| P02751 | 0 | 0.5217 | 540.6455 | 1619.922 | 0.82  | 0.00044  | 11.20854 |
| P02751 | 0 | 0.7857 | 543.2712 | 1627.799 | -1.67 | -0.00091 | 3.663336 |
| P02751 | 0 | 1      | 624.3139 | 1870.927 | 1.8   | 0.00112  | 0        |
| P02751 | 0 | 0.871  | 539.7943 | 1078.581 | 1.56  | 0.00084  | 24.39417 |
| P19823 | 0 | 1      | 650.3271 | 1948.967 | 1.72  | 0.00112  | 9.94997  |
| P19823 | 0 | 1      | 650.3278 | 1948.969 | 2.85  | 0.00185  | 8.052189 |
| P19823 | 0 | 1      | 487.997  | 1948.966 | 1.53  | 0.00074  | 4.265851 |
| P19823 | 0 | 1      | 974.9878 | 1948.968 | 2.54  | 0.00248  | 2.881969 |
| P19823 | 0 | 1      | 650.3263 | 1948.964 | 0.5   | 0.00033  | 4.392503 |
| P19823 | 0 | 0.8857 | 487.9972 | 1948.967 | 1.78  | 0.00087  | 0        |
| P19823 | 0 | 0.871  | 650.3254 | 1948.962 | -0.91 | -0.00059 | 0        |
| P19823 | 0 | 0.898  | 892.7506 | 2676.237 | 1     | 0.00089  | 9.276464 |
| P19823 | 0 | 0.9756 | 892.7502 | 2676.236 | 0.59  | 0.00052  | 6.30511  |
| P19823 | 0 | 0.9896 | 892.7508 | 2676.238 | 1.2   | 0.00107  | 3.325036 |
| P19823 | 1 | 1      | 537.3124 | 1609.923 | 2.7   | 0.00145  | 10.59046 |
| P19823 | 0 | 0.9474 | 791.9324 | 1582.858 | 1.8   | 0.00142  | 28.17818 |
| P19823 | 1 | 1      | 537.3124 | 1609.923 | 2.7   | 0.00145  | 10.59046 |
| P19823 | 0 | 0.6567 | 487.2947 | 973.5821 | 2.28  | 0.00111  | 0        |
| P19823 | 0 | 1      | 440.0078 | 1757.009 | 1.92  | 0.00084  | 35.53595 |
| P19823 | 0 | 0.9298 | 646.6956 | 1938.072 | 2.45  | 0.00158  | 19.35045 |
| P19823 | 0 | 0.9726 | 646.6954 | 1938.072 | 2.26  | 0.00146  | 8.4884   |
| P19823 | 0 | 0.9846 | 646.6952 | 1938.071 | 1.88  | 0.00122  | 10.70938 |
| P19823 | 0 | 0.9375 | 646.6954 | 1938.072 | 2.17  | 0.0014   | 3.963539 |
| P19823 | 0 | 0.8649 | 646.6959 | 1938.073 | 3.02  | 0.00195  | 9.18661  |
| P19823 | 0 | 0.9242 | 646.6954 | 1938.072 | 2.26  | 0.00146  | 3.92616  |
| P19823 | 0 | 0.9412 | 646.6977 | 1938.079 | 5.76  | 0.00372  | 0        |
| P19823 | 0 | 0.9808 | 646.6938 | 1938.067 | -0.29 | -0.00019 | 69.33345 |
| P19823 | 0 | 0.7561 | 646.6937 | 1938.066 | -0.48 | -0.00031 | 4.899889 |
| P19823 | 0 | 0.8704 | 646.6958 | 1938.073 | 2.83  | 0.00183  | 31.77669 |
| P19823 | 0 | 0.8387 | 646.6953 | 1938.071 | 2.07  | 0.00134  | 0        |
| P19823 | 0 | 0.875  | 646.6955 | 1938.072 | 2.35  | 0.00152  | 62.30809 |
| P19823 | 0 | 0.6486 | 646.6951 | 1938.071 | 1.79  | 0.00116  | 5.113354 |
| P19823 | 0 | 0.6216 | 646.6946 | 1938.069 | 1.03  | 0.00067  | 0        |
| P19823 | 0 | 0.9155 | 646.695  | 1938.07  | 1.6   | 0.00103  | 7.7906   |
| P19823 | 0 | 0.8871 | 646.696  | 1938.073 | 3.11  | 0.00201  | 1.868179 |



|        |   |        |          |          |       |          |          |
|--------|---|--------|----------|----------|-------|----------|----------|
| P19823 | 0 | 0.9365 | 646.6962 | 1938.074 | 3.49  | 0.00225  | 24.73537 |
| P19823 | 0 | 0.9828 | 646.6954 | 1938.072 | 2.26  | 0.00146  | 11.13316 |
| P19823 | 0 | 0.9153 | 646.6958 | 1938.073 | 2.83  | 0.00183  | 14.23139 |
| P19823 | 0 | 0.8507 | 646.6956 | 1938.072 | 2.45  | 0.00158  | 8.314161 |
| P19823 | 0 | 0.8571 | 646.6957 | 1938.072 | 2.64  | 0.0017   | 8.881416 |
| P19823 | 0 | 0.9615 | 969.5386 | 1938.07  | 1.35  | 0.00131  | 5.24963  |
| P19823 | 0 | 0.9254 | 646.6951 | 1938.071 | 1.79  | 0.00116  | 8.118793 |
| P19823 | 0 | 0.9412 | 969.5389 | 1938.07  | 1.61  | 0.00156  | 8.203665 |
| P19823 | 0 | 0.9385 | 646.6952 | 1938.071 | 1.88  | 0.00122  | 9.259316 |
| P19823 | 0 | 0.9697 | 969.5399 | 1938.072 | 2.61  | 0.00253  | 5.975577 |
| P19823 | 0 | 0.9344 | 646.6953 | 1938.071 | 2.07  | 0.00134  | 7.482445 |
| P19823 | 0 | 0.9099 | 969.5392 | 1938.071 | 1.92  | 0.00186  | 6.717195 |
| P19823 | 0 | 0.8507 | 646.6952 | 1938.071 | 1.88  | 0.00122  | 8.474336 |
| P19823 | 0 | 0.9667 | 969.5394 | 1938.071 | 2.11  | 0.00204  | 6.14079  |
| P19823 | 0 | 0.9365 | 646.6951 | 1938.071 | 1.79  | 0.00116  | 5.21696  |
| P19823 | 0 | 0.9583 | 969.5398 | 1938.072 | 2.55  | 0.00247  | 0        |
| P19823 | 0 | 1      | 892.7507 | 2676.238 | 1.14  | 0.00101  | 3.234253 |
| P19823 | 0 | 0.9155 | 669.8155 | 2676.24  | 2.07  | 0.00138  | 3.85085  |
| P19823 | 0 | 1      | 892.7514 | 2676.24  | 1.89  | 0.00168  | 3.579168 |
| P19823 | 0 | 0.7818 | 669.817  | 2676.246 | 4.26  | 0.00285  | 0        |
| P19823 | 1 | 1      | 585.3468 | 1754.026 | 3.16  | 0.00185  | 9.447807 |
| P19823 | 0 | 0.9    | 649.8575 | 1298.708 | 2.13  | 0.00139  | 3.222637 |
| P19823 | 0 | 1      | 461.5809 | 1382.728 | 1.72  | 0.00079  | 33.65332 |
| P19823 | 0 | 1      | 691.8685 | 1382.73  | 2.96  | 0.00205  | 0        |
| P19823 | 0 | 0.9375 | 646.6957 | 1938.072 | 2.64  | 0.0017   | 15.8395  |
| P19823 | 0 | 0.8776 | 646.6956 | 1938.072 | 2.54  | 0.00164  | 2.94751  |
| P19823 | 1 | 1      | 426.5794 | 1277.724 | 2.6   | 0.00111  | 65.19814 |
| P19823 | 0 | 1      | 713.8437 | 2852.353 | 2.43  | 0.00173  | 5.87711  |
| P19823 | 0 | 1      | 951.4559 | 2852.353 | 2.54  | 0.00242  | 3.243751 |
| P19823 | 0 | 0.8036 | 657.8552 | 1314.703 | 2.45  | 0.00161  | 6.631094 |
| P19823 | 0 | 0.8704 | 657.8552 | 1314.703 | 2.45  | 0.00161  | 6.388641 |
| P19823 | 0 | 1      | 440.0079 | 1757.01  | 2.2   | 0.00097  | 13.27489 |
| P19823 | 0 | 1      | 586.3419 | 1757.011 | 2.93  | 0.00172  | 7.835824 |
| P19823 | 0 | 1      | 440.0075 | 1757.008 | 1.22  | 0.00054  | 9.294937 |
| P19823 | 0 | 1      | 440.008  | 1757.01  | 2.34  | 0.00103  | 0        |
| P19823 | 0 | 1      | 440.0079 | 1757.01  | 2.06  | 0.0009   | 19.87256 |
| P19823 | 0 | 1      | 795.7504 | 2385.237 | 0.33  | 0.00026  | 2.153241 |
| P19823 | 0 | 0.8    | 804.1174 | 2410.338 | 1.86  | 0.0015   | 11.58696 |
| P19823 | 0 | 0.987  | 804.1174 | 2410.338 | 1.86  | 0.0015   | 4.697958 |
| P19823 | 0 | 0.85   | 603.3404 | 2410.34  | 2.69  | 0.00162  | 24.76373 |
| P19823 | 0 | 0.9062 | 633.0913 | 2529.343 | 2.13  | 0.00135  | 4.982163 |
| P19823 | 0 | 1      | 993.7443 | 3971.955 | -0.06 | -0.00006 | 0        |
| P19823 | 0 | 0.6923 | 633.0917 | 2529.345 | 2.71  | 0.00172  | 5.41684  |
| P19823 | 0 | 0.9615 | 863.9825 | 1726.958 | 0.58  | 0.0005   | 3.752822 |
| P19823 | 0 | 0.9429 | 576.3245 | 1726.959 | 1.17  | 0.00068  | 5.235427 |
| P19823 | 0 | 1      | 413.5463 | 1238.624 | 0.57  | 0.00024  | 24.50912 |
| P19823 | 0 | 0.9429 | 619.8174 | 1238.627 | 3.12  | 0.00193  | 0        |
| P19823 | 0 | 0.9583 | 650.3269 | 1948.966 | 1.44  | 0.00094  | 20.58689 |
| P19823 | 0 | 0.4    | 538.307  | 1612.906 | 1.54  | 0.00083  | 9.306217 |
| P19823 | 0 | 0.68   | 569.9821 | 1707.932 | 0.47  | 0.00027  | 45.11551 |
| P19823 | 1 | 0.9737 | 425.2676 | 1273.788 | 4.12  | 0.00175  | 9.015192 |
| P19823 | 0 | 0.8205 | 569.9844 | 1707.939 | 4.54  | 0.00258  | 2.256958 |

|        |   |        |          |          |      |         |          |
|--------|---|--------|----------|----------|------|---------|----------|
| P19823 | 0 | 0.6618 | 487.2946 | 973.582  | 2.16 | 0.00105 | 8.322962 |
| P19823 | 0 | 0.9333 | 569.9841 | 1707.938 | 4.11 | 0.00234 | 19.01415 |
| P19823 | 0 | 0.6    | 569.9837 | 1707.937 | 3.36 | 0.00191 | 10.5902  |
| P19823 | 0 | 0.7179 | 427.7389 | 1707.934 | 1.64 | 0.0007  | 7.647493 |
| P19823 | 0 | 0.8472 | 854.4705 | 1707.934 | 1.73 | 0.00147 | 4.508567 |
| P19823 | 0 | 0.9804 | 569.9823 | 1707.932 | 0.9  | 0.00051 | 9.457501 |
| P19823 | 0 | 0.8108 | 569.9836 | 1707.936 | 3.25 | 0.00185 | 37.84072 |
| P19823 | 0 | 0.9636 | 645.3597 | 1934.065 | 1.58 | 0.00102 | 4.345253 |
| P19823 | 0 | 1      | 645.3603 | 1934.066 | 2.44 | 0.00157 | 4.595862 |
| P19823 | 0 | 1      | 645.3601 | 1934.066 | 2.06 | 0.00133 | 4.590316 |
| P19823 | 1 | 1      | 694.6116 | 2775.425 | 2.34 | 0.00162 | 7.80178  |
| P19823 | 0 | 0.9756 | 645.3604 | 1934.067 | 2.63 | 0.00169 |          |
| P19823 | 0 | 1      | 1087.904 | 3261.696 | 1.71 | 0.00186 | 62.70473 |
| P19823 | 0 | 1      | 585.2677 | 1169.528 | 2.2  | 0.00129 | 24.66706 |
| P19823 | 1 | 1      | 426.579  | 1277.722 | 1.6  | 0.00068 | 17.17769 |
| P19823 | 1 | 0.9737 | 497.2603 | 1489.766 | 1.71 | 0.00085 | 14.27363 |
| P19823 | 1 | 1      | 1060.628 | 2120.248 | 0.63 | 0.00067 | 14.49867 |
| P19823 | 1 | 1      | 707.421  | 2120.249 | 0.71 | 0.0005  | 17.34978 |
| P19823 | 0 | 0.619  | 559.3467 | 1117.686 | 3.72 | 0.00208 | 7.267285 |
| P19823 | 0 | 0.4483 | 559.3458 | 1117.684 | 2.09 | 0.00117 | 4.152959 |
| P19823 | 0 | 0.7193 | 559.3465 | 1117.686 | 3.4  | 0.0019  | 0        |
| P19823 | 0 | 0.5357 | 633.0913 | 2529.343 | 2.13 | 0.00135 | 4.119233 |
| P19823 | 0 | 0.6818 | 633.0914 | 2529.344 | 2.23 | 0.00141 | 40.51474 |
| P19823 | 0 | 0.5405 | 633.0911 | 2529.343 | 1.84 | 0.00117 | 14.56382 |
| P19823 | 0 | 0.9459 | 633.09   | 2529.338 | 0.11 | 0.00007 | 5.533314 |
| P19823 | 0 | 1      | 843.7858 | 2529.343 | 1.87 | 0.00158 | 4.670127 |
| P19823 | 0 | 0.6842 | 506.6739 | 2529.34  | 0.92 | 0.00047 | 6.745314 |
| P19823 | 0 | 0.9383 | 685.0523 | 2053.142 | 1.34 | 0.00092 | 5.95778  |
| P19823 | 0 | 0.9818 | 1027.075 | 2053.142 | 1.2  | 0.00123 | 0        |
| P19823 | 0 | 0.7959 | 439.2667 | 1315.785 | 2.34 | 0.00102 | 10.8255  |
| P19823 | 0 | 0.8816 | 658.3965 | 1315.786 | 2.53 | 0.00167 | 5.811566 |
| P19823 | 0 | 0.8444 | 439.2681 | 1315.79  | 5.54 | 0.00243 | 9.061821 |
| P19823 | 0 | 0.8714 | 924.5306 | 1848.054 | 2.11 | 0.00195 | 22.12577 |
| P19823 | 0 | 0.8356 | 616.6895 | 1848.054 | 2.17 | 0.00134 | 2.916738 |
| P19823 | 0 | 0.9016 | 657.3183 | 1313.629 | 1.3  | 0.00085 | 3.185106 |
| P19823 | 0 | 1      | 438.5482 | 1313.63  | 1.76 | 0.00077 | 8.299137 |
| P19823 | 0 | 1      | 741.4166 | 1481.826 | 1.82 | 0.00135 | 4.076958 |
| P19823 | 0 | 0.9302 | 494.6137 | 1481.827 | 2.29 | 0.00113 | 3.902989 |
| P19823 | 0 | 1      | 494.6136 | 1481.826 | 1.92 | 0.00095 | 26.34913 |
| P19823 | 0 | 0.9231 | 808.6273 | 4039.107 | 0.99 | 0.0008  | 0        |
| P19823 | 0 | 0.9508 | 547.9625 | 1641.873 | 2.57 | 0.00141 | 7.548377 |
| P19823 | 0 | 1      | 821.4393 | 1641.871 | 1.62 | 0.00133 | 5.004364 |
| P19823 | 0 | 1      | 1010.54  | 4039.137 | 8.32 | 0.0084  | 10.39841 |
| P19823 | 0 | 1      | 898.0829 | 2692.234 | 1.7  | 0.00153 | 5.25773  |
| P19823 | 0 | 1      | 413.5465 | 1238.625 | 1.09 | 0.00045 | 23.53882 |
| P19823 | 0 | 0.4545 | 575.3409 | 1149.675 | 2.49 | 0.00143 | 29.68867 |
| P19823 | 0 | 1      | 440.0078 | 1757.009 | 1.92 | 0.00084 | 6.392457 |
| P19823 | 0 | 1      | 461.5809 | 1382.728 | 1.85 | 0.00085 | 61.52487 |
| P19823 | 0 | 0.913  | 646.6968 | 1938.076 | 4.34 | 0.0028  | 0        |
| P19823 | 0 | 1      | 879.0085 | 1757.01  | 2.07 | 0.00182 | 0        |
| P19823 | 0 | 0.3261 | 559.3466 | 1117.686 | 3.51 | 0.00196 | 10.31867 |
| P19823 | 0 | 0.5435 | 559.3462 | 1117.685 | 2.85 | 0.00159 | 22.53005 |

|        |   |        |          |          |       |          |          |
|--------|---|--------|----------|----------|-------|----------|----------|
| P19823 | 0 | 0.76   | 597.066  | 2385.242 | 2.58  | 0.00154  | 19.71237 |
| P19823 | 0 | 0.8095 | 650.3284 | 1948.971 | 3.7   | 0.0024   | 0        |
| P19823 | 0 | 0.48   | 597.0665 | 2385.244 | 3.39  | 0.00202  | 10.65519 |
| P19823 | 0 | 0.8571 | 440.0079 | 1757.01  | 2.06  | 0.0009   | 10.94782 |
| P19823 | 1 | 0.7273 | 531.6392 | 1592.903 | 2.05  | 0.00109  | 4.205298 |
| P19823 | 0 | 0.8889 | 602.2933 | 1804.865 | 2.31  | 0.00139  | 4.622339 |
| P19823 | 0 | 1      | 461.5804 | 1382.727 | 0.59  | 0.00027  | 30.95078 |
| P19823 | 0 | 0.8148 | 645.3598 | 1934.065 | 1.68  | 0.00108  | 62.51734 |
| P19823 | 0 | 0.8889 | 646.6947 | 1938.07  | 1.13  | 0.00073  | 33.59188 |
| P19823 | 0 | 0.9091 | 969.5378 | 1938.068 | 0.47  | 0.00046  | 33.37907 |
| P19823 | 0 | 1      | 650.329  | 1948.973 | 4.73  | 0.00307  | 30.2214  |
| P19823 | 0 | 0.4444 | 403.9822 | 1612.907 | 1.8   | 0.00072  | 13.72105 |
| P19823 | 0 | 0.7872 | 586.3457 | 1171.684 | 3.27  | 0.00192  | 4.841331 |
| P19823 | 0 | 0.3778 | 510.801  | 1020.595 | 1.9   | 0.00097  | 7.314756 |
| P19823 | 0 | 1      | 461.5802 | 1382.726 | 0.33  | 0.00015  | 26.13413 |
| P19823 | 0 | 0.7632 | 560.8162 | 1120.625 | 1.83  | 0.00103  | 32.86502 |
| P19823 | 0 | 0.5526 | 383.8964 | 1149.675 | 2.58  | 0.00099  | 11.09172 |
| P19823 | 0 | 1      | 443.88   | 1329.626 | 2.28  | 0.00101  | 20.71251 |
| P19823 | 0 | 1      | 440.0079 | 1757.01  | 2.06  | 0.0009   | 38.88612 |
| P19823 | 0 | 1      | 479.723  | 958.4387 | 1.03  | 0.00049  | 1.236645 |
| P19823 | 0 | 1      | 669.366  | 1337.725 | 2.67  | 0.00178  | 0        |
| P19823 | 1 | 1      | 585.3467 | 1754.026 | 3.06  | 0.00179  | 20.01776 |
| P19823 | 0 | 0.5385 | 510.8004 | 1020.593 | 0.71  | 0.00036  | 26.29689 |
| P19823 | 0 | 0.4286 | 597.0659 | 2385.242 | 2.47  | 0.00147  | 0        |
| P19823 | 0 | 0.88   | 669.8137 | 2676.233 | -0.58 | -0.00039 | 19.21533 |
| P19823 | 0 | 1      | 898.0833 | 2692.235 | 2.11  | 0.00189  | 8.795095 |
| P19823 | 0 | 1      | 593.2656 | 1185.524 | 2.96  | 0.00175  | 19.80198 |
| P19823 | 2 | 0.0588 | 464.953  | 1392.844 | 2.28  | 0.00106  | 39.93721 |
| P19823 | 1 | 0.6667 | 377.2325 | 1129.683 | 1.71  | 0.00064  | 21.77676 |
| P19823 | 0 | 1      | 440.0073 | 1757.007 | 0.74  | 0.00032  | 50.02226 |
| P19823 | 0 | 0.5122 | 495.2921 | 989.577  | 2.2   | 0.00109  | 10.51057 |
| P19823 | 0 | 0.9167 | 646.6977 | 1938.079 | 5.76  | 0.00372  | 24.03932 |
| P19823 | 1 | 1      | 513.6148 | 1538.83  | 2     | 0.00102  | 61.11507 |
| P19823 | 0 | 0.8485 | 433.574  | 1298.708 | 1.94  | 0.00084  | 21.03227 |
| P19823 | 0 | 0.7556 | 547.8106 | 1094.614 | 1.85  | 0.00101  | 17.59296 |
| P19823 | 0 | 1      | 479.7232 | 958.4391 | 1.48  | 0.00071  | 1.961053 |
| P19823 | 0 | 0.6    | 538.3073 | 1612.907 | 1.99  | 0.00107  | 33.26962 |
| P19823 | 0 | 0.7826 | 645.3612 | 1934.069 | 3.86  | 0.00249  | 0        |
| P19823 | 0 | 0.7632 | 547.8106 | 1094.614 | 1.96  | 0.00107  | 30.49237 |
| P19823 | 0 | 1      | 993.7463 | 3971.964 | 2.03  | 0.00201  | 2.224888 |
| P19823 | 0 | 0.8333 | 547.8115 | 1094.616 | 3.52  | 0.00193  | 46.23673 |
| P19823 | 0 | 0.8966 | 446.2489 | 891.4905 | 1.24  | 0.00055  | 5.590342 |
| P19823 | 0 | 0.5484 | 575.3414 | 1149.676 | 3.34  | 0.00192  | 44.35783 |
| P19823 | 0 | 0.875  | 795.7543 | 2385.248 | 5.17  | 0.00411  | 21.14001 |
| P19823 | 0 | 0.6364 | 559.3455 | 1117.684 | 1.65  | 0.00092  | 0        |
| P19823 | 0 | 0.4516 | 438.9059 | 1314.703 | 2.46  | 0.00108  | 14.78954 |
| P19823 | 0 | 0.6286 | 510.801  | 1020.595 | 1.84  | 0.00094  | 0        |
| P19823 | 0 | 1      | 413.5466 | 1238.625 | 1.39  | 0.00057  | 78.91801 |
| P19823 | 0 | 0.9565 | 499.9279 | 1497.769 | 1.77  | 0.00088  | 16.7561  |
| P19823 | 0 | 0.9    | 518.2999 | 1035.593 | 1.06  | 0.00055  | 3.051961 |
| P19823 | 0 | 1      | 518.2996 | 1035.592 | 0.47  | 0.00024  | 3.583137 |
| P19823 | 0 | 0.7059 | 633.0897 | 2529.337 | -0.47 | -0.0003  | 28.20782 |

|        |   |        |          |          |       |          |          |
|--------|---|--------|----------|----------|-------|----------|----------|
| P19823 | 0 | 0.8571 | 969.5395 | 1938.072 | 2.24  | 0.00217  | 3.449175 |
| P19823 | 0 | 0.5    | 403.9825 | 1612.908 | 2.48  | 0.001    | 23.94367 |
| P19823 | 0 | 0.3684 | 495.2917 | 989.5761 | 1.34  | 0.00066  | 14.93933 |
| P19823 | 0 | 0.8605 | 547.8107 | 1094.614 | 2.19  | 0.0012   | 5.805288 |
| P19823 | 0 | 1      | 804.1176 | 2410.338 | 2.01  | 0.00162  | 22.72613 |
| P19823 | 0 | 0.5789 | 804.1174 | 2410.338 | 1.86  | 0.0015   | 0        |
| P19823 | 0 | 1      | 547.9625 | 1641.873 | 2.57  | 0.00141  | 72.589   |
| P19823 | 0 | 1      | 892.7502 | 2676.236 | 0.59  | 0.00052  | 11.12249 |
| P19823 | 0 | 0.7826 | 547.8106 | 1094.614 | 1.96  | 0.00107  | 14.67545 |
| P19823 | 0 | 0.9286 | 619.8159 | 1238.625 | 0.76  | 0.00047  | 0        |
| P19823 | 0 | 1      | 669.3663 | 1337.725 | 3.03  | 0.00203  | 5.97924  |
| P19823 | 0 | 0.8    | 487.2945 | 973.5818 | 1.97  | 0.00096  | 24.56739 |
| P19823 | 0 | 0.5714 | 575.3385 | 1149.67  | -1.76 | -0.00101 | 29.21977 |
| P19823 | 0 | 1      | 586.3427 | 1757.013 | 4.19  | 0.00245  | 0        |
| P19823 | 0 | 0.5    | 510.7988 | 1020.59  | -2.34 | -0.0012  | 0        |
| P19823 | 0 | 0.6316 | 383.8958 | 1149.673 | 0.91  | 0.00035  | 50.16993 |
| P19823 | 0 | 0.9231 | 413.5466 | 1238.625 | 1.24  | 0.00051  | 29.28199 |
| P19823 | 0 | 1      | 650.3268 | 1948.966 | 1.35  | 0.00088  | 23.32343 |
| P19823 | 0 | 1      | 440.007  | 1757.006 | 0.11  | 0.00005  | 8.228024 |
| P19823 | 1 | 1      | 439.2585 | 1754.012 | -4.53 | -0.00199 | 38.0364  |
| P19823 | 0 | 0.7234 | 487.297  | 973.5868 | 7.11  | 0.00346  | 0        |
| P19823 | 0 | 0      | 633.0895 | 2529.336 | -0.76 | -0.00048 | 21.60957 |
| P19823 | 0 | 1      | 547.81   | 1094.613 | 0.85  | 0.00046  | 7.859261 |
| P19823 | 0 | 0.8214 | 438.9063 | 1314.704 | 3.37  | 0.00148  | 41.12018 |
| P19823 | 0 | 0.8333 | 795.7526 | 2385.243 | 3.02  | 0.0024   | 35.26109 |
| P19823 | 0 | 0.6    | 495.2914 | 989.5755 | 0.72  | 0.00036  | 3.220678 |
| P19823 | 1 | 0.9412 | 497.2598 | 1489.765 | 0.67  | 0.00033  | 7.064361 |
| P19823 | 0 | 0.9167 | 673.8136 | 2692.233 | 1.13  | 0.00076  | 6.691668 |
| P19823 | 0 | 1      | 795.1981 | 3971.961 | 1.52  | 0.0012   | 0        |
| P19823 | 0 | 1      | 586.343  | 1757.015 | 4.81  | 0.00282  | 28.12617 |
| P00450 | 0 | 1      | 716.3232 | 1431.639 | 0.38  | 0.00027  | 22.10671 |
| P00450 | 0 | 0.9434 | 555.2869 | 1663.846 | 0.75  | 0.00041  | 0        |
| P00450 | 0 | 0.9884 | 760.3764 | 1519.746 | 1.84  | 0.0014   | 0        |
| P00450 | 1 | 1      | 538.5002 | 2688.472 | 1.5   | 0.00081  | 17.78234 |
| P00450 | 1 | 1      | 628.6398 | 1883.905 | 3.94  | 0.00247  | 5.385663 |
| P00450 | 0 | 0.6    | 490.2775 | 1468.818 | 1.9   | 0.00093  | 11.74921 |
| P00450 | 0 | 1      | 931.7825 | 2793.333 | 1.75  | 0.00163  | 3.441377 |
| P00450 | 0 | 1      | 931.7838 | 2793.337 | 3.13  | 0.00291  | 3.357131 |
| P00450 | 0 | 1      | 931.7835 | 2793.336 | 2.8   | 0.00261  | 5.249866 |
| P00450 | 0 | 1      | 931.7819 | 2793.331 | 1.09  | 0.00102  | 3.424155 |
| P00450 | 0 | 1      | 1397.171 | 2793.334 | 2.26  | 0.00315  | 5.354288 |
| P00450 | 0 | 1      | 699.0904 | 2793.34  | 4.21  | 0.00294  | 20.40367 |
| P00450 | 0 | 1      | 699.0888 | 2793.333 | 1.94  | 0.00136  | 2.919945 |
| P00450 | 0 | 1      | 931.7818 | 2793.331 | 1.03  | 0.00096  | 3.541387 |
| P00450 | 0 | 0.9841 | 662.8615 | 1324.716 | 1.98  | 0.00131  | 0        |
| P00450 | 0 | 1      | 442.2433 | 1324.715 | 1.67  | 0.00074  | 11.73983 |
| P00450 | 0 | 1      | 883.7482 | 2649.23  | 1.53  | 0.00135  | 3.212005 |
| P00450 | 0 | 1      | 1142.187 | 3424.548 | 1.35  | 0.00154  | 0.848651 |
| P00450 | 0 | 0.4375 | 490.2775 | 1468.818 | 1.96  | 0.00096  | 12.42609 |
| P00450 | 0 | 1      | 662.861  | 1324.715 | 1.34  | 0.00089  | 6.421204 |
| P00450 | 0 | 0.8983 | 442.2426 | 1324.713 | 0.15  | 0.00007  | 37.59397 |
| P00450 | 0 | 0.8611 | 734.9134 | 1468.82  | 3.03  | 0.00222  | 7.48674  |

|        |   |        |          |          |       |          |          |
|--------|---|--------|----------|----------|-------|----------|----------|
| P00450 | 0 | 0.6552 | 490.278  | 1468.819 | 2.89  | 0.00142  | 30.14811 |
| P00450 | 0 | 0.5    | 490.2771 | 1468.817 | 1.09  | 0.00053  | 12.09193 |
| P00450 | 1 | 1      | 628.639  | 1883.903 | 2.77  | 0.00174  | 7.20571  |
| P00450 | 1 | 1      | 862.9431 | 3448.75  | 2.95  | 0.00254  | 3.306401 |
| P00450 | 1 | 1      | 1150.254 | 3448.748 | 2.12  | 0.00243  | 4.316582 |
| P00450 | 0 | 1      | 442.2431 | 1324.715 | 1.4   | 0.00062  | 0        |
| P00450 | 0 | 0.9825 | 643.338  | 1927.999 | 2.93  | 0.00189  | 8.923564 |
| P00450 | 0 | 0.9828 | 643.3384 | 1928.001 | 3.6   | 0.00231  | 9.050024 |
| P00450 | 0 | 1      | 1316.202 | 2631.396 | 2.44  | 0.00321  | 0        |
| P00450 | 0 | 1      | 442.243  | 1324.714 | 1.12  | 0.0005   | 6.907844 |
| P00450 | 1 | 1      | 628.639  | 1883.902 | 2.67  | 0.00168  | 3.255791 |
| P00450 | 0 | 1      | 672.3326 | 2686.309 | 2.23  | 0.0015   | 6.145591 |
| P00450 | 0 | 1      | 672.3323 | 2686.307 | 1.69  | 0.00113  | 3.358502 |
| P00450 | 0 | 0.9296 | 672.3328 | 2686.309 | 2.5   | 0.00168  | 2.964321 |
| P00450 | 0 | 0.9559 | 672.333  | 2686.31  | 2.78  | 0.00186  | 2.729214 |
| P00450 | 0 | 0.9744 | 672.3314 | 2686.304 | 0.32  | 0.00022  | 0        |
| P00450 | 0 | 0.9792 | 672.3326 | 2686.308 | 2.14  | 0.00144  | 4.476688 |
| P00450 | 0 | 1      | 745.3688 | 2234.092 | 1.5   | 0.00111  | 15.52868 |
| P00450 | 0 | 1      | 1117.55  | 2234.092 | 1.67  | 0.00186  | 0        |
| P00450 | 0 | 1      | 1136.856 | 3408.554 | 1.87  | 0.00212  | 7.776856 |
| P00450 | 0 | 1      | 852.8937 | 3408.553 | 1.49  | 0.00127  | 1.380633 |
| P00450 | 0 | 1      | 1136.856 | 3408.553 | 1.33  | 0.00151  | 0        |
| P00450 | 1 | 1      | 729.8887 | 2916.533 | -0.25 | -0.00018 | 10.62074 |
| P00450 | 0 | 1      | 658.6039 | 2631.394 | 1.45  | 0.00096  | 3.434263 |
| P00450 | 2 | 1      | 770.605  | 3848.996 | -0.01 | -0.00001 | 0        |
| P00450 | 0 | 0.8684 | 705.6188 | 2819.454 | 1.46  | 0.00103  | 3.725968 |
| P00450 | 0 | 0.9767 | 940.4902 | 2819.456 | 2.39  | 0.00225  | 3.935268 |
| P00450 | 0 | 0.95   | 555.2874 | 1663.848 | 1.63  | 0.0009   | 4.835274 |
| P00450 | 0 | 1      | 832.4258 | 1663.844 | -0.31 | -0.00026 | 3.414218 |
| P00450 | 0 | 0.8718 | 705.6185 | 2819.452 | 1.02  | 0.00072  | 4.264041 |
| P00450 | 0 | 0.9636 | 940.4898 | 2819.455 | 1.87  | 0.00176  | 4.228877 |
| P00450 | 0 | 0.9118 | 940.4901 | 2819.456 | 2.2   | 0.00206  | 3.504708 |
| P00450 | 0 | 0.8769 | 505.9606 | 1515.867 | 1.33  | 0.00067  | 5.002064 |
| P00450 | 0 | 0.9524 | 832.4278 | 1663.848 | 2.11  | 0.00176  | 13.00554 |
| P00450 | 0 | 0.8125 | 940.4903 | 2819.456 | 2.46  | 0.00231  | 30.20859 |
| P00450 | 0 | 0.8056 | 705.6194 | 2819.456 | 2.24  | 0.00158  | 5.9952   |
| P00450 | 0 | 0.8298 | 705.6186 | 2819.453 | 1.11  | 0.00078  | 0        |
| P00450 | 0 | 0.8936 | 940.4902 | 2819.456 | 2.33  | 0.00219  | 7.487749 |
| P00450 | 0 | 0.8286 | 758.4374 | 1515.868 | 1.62  | 0.00123  | 19.38717 |
| P00450 | 0 | 0.9286 | 499.2859 | 1495.843 | -0.03 | -0.00001 | 53.20101 |
| P00450 | 0 | 1      | 586.9836 | 1758.936 | 3.62  | 0.00212  | 9.275547 |
| P00450 | 0 | 0.9302 | 879.9705 | 1758.934 | 2.17  | 0.00191  | 6.121106 |
| P00450 | 0 | 1      | 586.9816 | 1758.93  | 0.28  | 0.00017  | 8.026421 |
| P00450 | 0 | 0.86   | 499.2851 | 1495.841 | -1.62 | -0.00081 | 42.10028 |
| P00450 | 1 | 1      | 969.4645 | 2906.379 | 2.23  | 0.00216  | 5.443057 |
| P00450 | 1 | 1      | 727.3495 | 2906.376 | 1.22  | 0.00089  | 5.718077 |
| P00450 | 0 | 1      | 785.8994 | 3140.576 | 3.3   | 0.00259  | 24.12132 |
| P00450 | 1 | 1      | 969.4647 | 2906.38  | 2.42  | 0.00234  | 6.318775 |
| P00450 | 1 | 1      | 727.3475 | 2906.368 | -1.55 | -0.00113 | 6.256988 |
| P00450 | 1 | 1      | 969.4651 | 2906.381 | 2.8   | 0.00271  | 5.95311  |
| P00450 | 1 | 1      | 727.35   | 2906.378 | 1.97  | 0.00143  | 5.856743 |
| P00450 | 0 | 0.9444 | 879.9699 | 1758.933 | 1.54  | 0.00136  | 5.59929  |

|        |   |        |          |          |       |          |          |
|--------|---|--------|----------|----------|-------|----------|----------|
| P00450 | 0 | 0.9804 | 674.3188 | 1347.63  | 0.43  | 0.00029  | 3.096059 |
| P00450 | 0 | 1      | 586.687  | 1758.046 | 1.56  | 0.00091  | 7.870058 |
| P00450 | 0 | 0.9815 | 674.318  | 1347.629 | -0.75 | -0.00051 | 9.394844 |
| P00450 | 0 | 0.8889 | 879.5267 | 1758.046 | 1.33  | 0.00116  | 5.536721 |
| P00450 | 0 | 0.9508 | 674.3197 | 1347.632 | 1.79  | 0.0012   | 6.71616  |
| P00450 | 0 | 1      | 785.9022 | 3140.587 | 6.88  | 0.0054   | 12.26911 |
| P00450 | 1 | 1      | 974.7971 | 2922.377 | 3.19  | 0.0031   | 5.893039 |
| P00450 | 1 | 1      | 731.3487 | 2922.373 | 1.87  | 0.00136  | 5.526311 |
| P00450 | 1 | 1      | 974.7959 | 2922.373 | 1.93  | 0.00188  | 5.215619 |
| P00450 | 1 | 1      | 731.3488 | 2922.373 | 2.03  | 0.00149  | 6.459257 |
| P00450 | 0 | 1      | 662.8615 | 1324.716 | 1.98  | 0.00131  | 4.162364 |
| P00450 | 0 | 1      | 442.2437 | 1324.716 | 2.57  | 0.00114  | 24.06189 |
| P00450 | 0 | 0.127  | 1100.672 | 2200.338 | 1.33  | 0.00147  | 0        |
| P00450 | 0 | 0.9787 | 734.1173 | 2200.337 | 1.11  | 0.00081  | 5.333075 |
| P00450 | 2 | 0.5    | 513.6468 | 1538.926 | 1.47  | 0.00075  | 13.77847 |
| P00450 | 0 | 0.9787 | 734.1173 | 2200.337 | 1.11  | 0.00081  | 5.333075 |
| P00450 | 0 | 0.8033 | 490.2769 | 1468.816 | 0.65  | 0.00032  | 10.81433 |
| P00450 | 0 | 1      | 782.1525 | 2344.443 | 2.65  | 0.00207  | 7.184777 |
| P00450 | 0 | 0.9487 | 586.8665 | 2344.444 | 3.06  | 0.00179  | 2.36209  |
| P00450 | 0 | 1      | 1172.725 | 2344.443 | 2.6   | 0.00305  | 0        |
| P00450 | 0 | 1      | 1155.043 | 4617.15  | -2.47 | -0.00285 | 0        |
| P00450 | 0 | 1      | 924.2405 | 4617.173 | 2.56  | 0.00237  | 7.549236 |
| P00450 | 0 | 0.8043 | 493.9552 | 1479.851 | 1.83  | 0.0009   | 9.000023 |
| P00450 | 0 | 0.8649 | 740.4293 | 1479.851 | 2.05  | 0.00152  | 7.005876 |
| P00450 | 0 | 1      | 683.313  | 2047.924 | 0.88  | 0.0006   | 11.40783 |
| P00450 | 0 | 1      | 1024.467 | 2047.926 | 1.81  | 0.00186  | 3.644149 |
| P00450 | 0 | 1      | 683.3133 | 2047.925 | 1.33  | 0.00091  | 2.629423 |
| P00450 | 0 | 1      | 952.4161 | 1903.825 | 2.28  | 0.00217  | 0        |
| P00450 | 1 | 1      | 500.5142 | 1999.035 | 0.33  | 0.00016  | 43.95255 |
| P00450 | 1 | 0.9211 | 667.0178 | 1999.039 | 2.26  | 0.00151  | 12.60032 |
| P00450 | 1 | 0.9    | 500.5148 | 1999.037 | 1.43  | 0.00071  | 13.20689 |
| P00450 | 1 | 0.9211 | 667.0175 | 1999.038 | 1.71  | 0.00114  | 11.05159 |
| P00450 | 1 | 0.8846 | 500.5149 | 1999.038 | 1.61  | 0.00081  | 11.62384 |
| P00450 | 1 | 0.9318 | 667.0176 | 1999.038 | 1.99  | 0.00132  | 11.43828 |
| P00450 | 1 | 0.8276 | 500.5144 | 1999.036 | 0.76  | 0.00038  | 12.30724 |
| P00450 | 1 | 1      | 667.0181 | 1999.04  | 2.72  | 0.00181  | 16.28873 |
| P00450 | 0 | 0.9792 | 879.5293 | 1758.051 | 4.31  | 0.00379  | 29.65958 |
| P00450 | 0 | 1      | 586.687  | 1758.046 | 1.46  | 0.00085  | 0        |
| P00450 | 1 | 0.9048 | 667.0183 | 1999.04  | 2.99  | 0.00199  | 7.382736 |
| P00450 | 1 | 1      | 500.5147 | 1999.037 | 1.37  | 0.00068  | 0        |
| P00450 | 1 | 0.9091 | 667.0176 | 1999.038 | 1.89  | 0.00126  | 17.03421 |
| P00450 | 1 | 0.9677 | 500.5144 | 1999.036 | 0.76  | 0.00038  | 10.08507 |
| P00450 | 1 | 1      | 731.35   | 2922.378 | 3.62  | 0.00264  | 2.04298  |
| P00450 | 1 | 1      | 731.349  | 2922.374 | 2.28  | 0.00167  | 7.070083 |
| P00450 | 0 | 1      | 802.004  | 4005.991 | 2.02  | 0.00162  | 21.19365 |
| P00450 | 1 | 0.9032 | 500.5146 | 1999.036 | 1     | 0.0005   | 8.621091 |
| P00450 | 1 | 0.975  | 667.0179 | 1999.039 | 2.35  | 0.00157  | 11.03618 |
| P00450 | 1 | 0.8857 | 500.5147 | 1999.037 | 1.18  | 0.00059  | 8.682019 |
| P00450 | 1 | 0.9149 | 667.0176 | 1999.038 | 1.89  | 0.00126  | 10.40071 |
| P00450 | 1 | 0.9302 | 667.0187 | 1999.042 | 3.63  | 0.00242  | 6.343308 |
| P00450 | 1 | 0.975  | 577.9533 | 1731.845 | 1.93  | 0.00112  | 16.16106 |
| P00450 | 0 | 1      | 785.8979 | 3140.57  | 1.36  | 0.00107  | 7.190181 |

|        |   |        |          |          |       |          |          |
|--------|---|--------|----------|----------|-------|----------|----------|
| P00450 | 1 | 0.8    | 667.0178 | 1999.039 | 2.17  | 0.00144  | 12.09949 |
| P00450 | 1 | 1      | 500.5148 | 1999.037 | 1.43  | 0.00071  | 11.7835  |
| P00450 | 1 | 0.9024 | 667.0177 | 1999.039 | 2.08  | 0.00138  | 10.93154 |
| P00450 | 1 | 1      | 577.9537 | 1731.846 | 2.67  | 0.00154  | 19.3633  |
| P00450 | 1 | 0.9535 | 1000.023 | 1999.039 | 2.05  | 0.00205  | 0        |
| P00450 | 1 | 0.8889 | 577.9534 | 1731.846 | 2.15  | 0.00124  | 16.0069  |
| P00450 | 1 | 1      | 667.0175 | 1999.038 | 1.71  | 0.00114  | 13.85439 |
| P00450 | 1 | 0.931  | 500.5147 | 1999.037 | 1.18  | 0.00059  | 6.32183  |
| P00450 | 1 | 0.8919 | 667.0176 | 1999.038 | 1.89  | 0.00126  | 10.53005 |
| P00450 | 1 | 0.8667 | 577.9536 | 1731.846 | 2.46  | 0.00142  | 6.217479 |
| P00450 | 1 | 0.9    | 500.515  | 1999.038 | 1.8   | 0.0009   | 9.34144  |
| P00450 | 0 | 1      | 716.3237 | 1431.64  | 0.98  | 0.0007   | 0.999475 |
| P00450 | 0 | 0.9245 | 525.9193 | 1575.743 | 1.68  | 0.00088  | 5.883184 |
| P00450 | 0 | 0.9846 | 788.3753 | 1575.743 | 1.65  | 0.0013   | 3.334193 |
| P00450 | 0 | 0.9556 | 788.3753 | 1575.743 | 1.65  | 0.0013   | 100      |
| P00450 | 0 | 1      | 788.3751 | 1575.743 | 1.34  | 0.00106  | 100      |
| P00450 | 0 | 0.8776 | 651.3198 | 1301.632 | 2.93  | 0.0019   | 6.181798 |
| P00450 | 0 | 1      | 943.7922 | 2829.362 | 2.04  | 0.00193  | 2.960512 |
| P00450 | 0 | 1      | 731.8798 | 1462.752 | 2.29  | 0.00168  | 6.474932 |
| P00450 | 0 | 0.8103 | 594.8309 | 1188.654 | 3.52  | 0.00209  | 6.572426 |
| P00450 | 0 | 1      | 604.8247 | 2416.277 | 2.46  | 0.00149  | 11.9157  |
| P00450 | 0 | 0.875  | 806.0964 | 2416.275 | 1.46  | 0.00117  | 4.904213 |
| P00450 | 1 | 1      | 628.6384 | 1883.901 | 1.7   | 0.00107  | 13.25065 |
| P00450 | 1 | 1      | 628.6394 | 1883.904 | 3.35  | 0.00211  | 7.845357 |
| P00450 | 1 | 1      | 942.4544 | 1883.901 | 2.16  | 0.00204  | 2.77908  |
| P00450 | 1 | 1      | 628.6375 | 1883.898 | 0.24  | 0.00015  | 8.706073 |
| P00450 | 1 | 1      | 942.4545 | 1883.902 | 2.36  | 0.00222  | 7.306626 |
| P00450 | 1 | 0.9333 | 471.7304 | 1883.9   | 1.24  | 0.00058  | 6.87355  |
| P00450 | 1 | 0.9444 | 636.8489 | 2544.374 | 3.11  | 0.00198  | 49.05018 |
| P00450 | 0 | 0.9868 | 757.3682 | 1513.729 | 2.08  | 0.00157  | 5.889874 |
| P00450 | 1 | 0.9444 | 636.8489 | 2544.374 | 3.11  | 0.00198  | 49.05018 |
| P00450 | 1 | 0.9444 | 538.5002 | 2688.472 | 1.39  | 0.00075  | 14.23408 |
| P00450 | 1 | 1      | 538.5005 | 2688.473 | 1.96  | 0.00105  | 8.268015 |
| P00450 | 0 | 1      | 871.4406 | 4353.174 | -0.21 | -0.00018 | 0        |
| P00450 | 1 | 1      | 538.5006 | 2688.474 | 2.18  | 0.00117  | 8.091995 |
| P00450 | 1 | 1      | 672.8745 | 2688.476 | 2.94  | 0.00197  | 7.483015 |
| P00450 | 1 | 1      | 672.8748 | 2688.477 | 3.48  | 0.00234  | 5.055246 |
| P00450 | 1 | 1      | 538.5004 | 2688.473 | 1.73  | 0.00093  | 8.847569 |
| P00450 | 1 | 1      | 538.5007 | 2688.474 | 2.3   | 0.00124  | 9.509255 |
| P00450 | 1 | 1      | 672.8743 | 2688.475 | 2.67  | 0.00179  | 6.640608 |
| P00450 | 1 | 1      | 538.5009 | 2688.475 | 2.75  | 0.00148  | 11.57976 |
| P00450 | 1 | 1      | 672.874  | 2688.474 | 2.3   | 0.00155  | 7.855739 |
| P00450 | 1 | 1      | 538.5013 | 2688.478 | 3.55  | 0.00191  | 11.23257 |
| P00450 | 0 | 1      | 1407.186 | 2813.364 | 1.08  | 0.00151  | 0        |
| P00450 | 0 | 1      | 938.4608 | 2813.368 | 2.29  | 0.00214  | 17.25761 |
| P00450 | 0 | 1      | 704.0972 | 2813.367 | 1.98  | 0.00139  | 3.170245 |
| P00450 | 0 | 1      | 1001.527 | 3002.566 | 3.93  | 0.00394  | 9.767673 |
| P00450 | 1 | 0.093  | 618.9837 | 1854.937 | 2.28  | 0.00141  | 7.920289 |
| P00450 | 1 | 0.9787 | 618.984  | 1854.937 | 2.67  | 0.00165  | 0        |
| P00450 | 1 | 0.9787 | 618.984  | 1854.937 | 2.67  | 0.00165  | 0        |
| P00450 | 0 | 0.8873 | 860.4841 | 1719.961 | 1.51  | 0.0013   | 3.624142 |
| P00450 | 0 | 1      | 751.3945 | 3002.556 | 0.61  | 0.00046  | 4.879777 |

|        |   |        |          |          |       |          |          |
|--------|---|--------|----------|----------|-------|----------|----------|
| P00450 | 0 | 0.9811 | 643.3373 | 1927.997 | 1.89  | 0.00121  | 17.38432 |
| P00450 | 0 | 0.963  | 643.3386 | 1928.001 | 3.79  | 0.00243  | 13.15815 |
| P00450 | 0 | 0.8478 | 493.587  | 1478.746 | 1.71  | 0.00085  | 11.47195 |
| P00450 | 0 | 1      | 807.4756 | 1613.944 | 1.38  | 0.00111  | 3.260042 |
| P00450 | 0 | 0.8627 | 594.83   | 1188.653 | 2.08  | 0.00124  | 9.080737 |
| P00450 | 1 | 1      | 538.5006 | 2688.474 | 2.07  | 0.00111  | 16.70759 |
| P00450 | 0 | 1      | 802.0032 | 4005.987 | 1.03  | 0.00082  | 8.911998 |
| P00450 | 1 | 1      | 628.6387 | 1883.901 | 2.19  | 0.00137  | 16.25809 |
| P00450 | 1 | 0.0444 | 618.9841 | 1854.938 | 2.97  | 0.00184  | 10.26887 |
| P00450 | 1 | 0.9091 | 921.4298 | 2762.275 | 1.51  | 0.00139  | 3.626569 |
| P00450 | 0 | 0.8333 | 564.6967 | 2819.454 | 1.69  | 0.00095  | 31.19411 |
| P00450 | 1 | 0.0612 | 580.6051 | 1739.801 | 3.15  | 0.00182  | 0        |
| P00450 | 0 | 0.8958 | 449.8821 | 1347.632 | 1.39  | 0.00063  | 4.289437 |
| P00450 | 1 | 1      | 471.7307 | 1883.901 | 2.02  | 0.00095  | 5.756726 |
| P00450 | 1 | 0.9091 | 471.7307 | 1883.901 | 1.89  | 0.00089  | 12.30833 |
| P00450 | 0 | 1      | 602.2698 | 1203.532 | 3.94  | 0.00237  | 30.25021 |
| P00450 | 1 |        | 618.9841 | 1854.938 | 2.97  | 0.00184  | 10.26887 |
| P00450 | 0 | 0.9756 | 586.689  | 1758.053 | 5     | 0.00293  | 4.026516 |
| P00450 | 0 | 1      | 699.3066 | 1397.606 | 0.75  | 0.00052  | 0        |
| P00450 | 0 | 0.95   | 538.9481 | 1614.83  | 1.15  | 0.00062  | 18.24586 |
| P00450 | 0 | 0.825  | 525.9191 | 1575.743 | 1.22  | 0.00064  | 11.26662 |
| P00450 | 1 | 0.9286 | 538.5006 | 2688.474 | 2.07  | 0.00111  | 46.29192 |
| P00450 | 0 | 0.6786 | 422.2188 | 1264.642 | 0.63  | 0.00026  | 9.718333 |
| P00450 | 0 | 0.8571 | 594.8311 | 1188.655 | 3.93  | 0.00233  | 26.8159  |
| P00450 | 0 | 0.9091 | 555.2858 | 1663.843 | -1.23 | -0.00068 | 20.22786 |
| P00450 | 0 | 1      | 488.2555 | 1462.752 | 2.05  | 0.001    | 10.00049 |
| P00450 | 0 | 0.7561 | 505.9619 | 1515.871 | 4.05  | 0.00205  | 0        |
| P00450 | 0 | 0.9818 | 716.3244 | 1431.642 | 2     | 0.00143  | 0        |
| P00450 | 0 | 0.9697 | 493.5874 | 1478.748 | 2.46  | 0.00121  | 18.65011 |
| P00450 | 0 | 0.9394 | 555.2871 | 1663.847 | 1.08  | 0.0006   | 31.31767 |
| P00450 | 1 | 1      | 395.244  | 1577.954 | 1.53  | 0.0006   | 18.21799 |
| P00450 | 0 | 0.7692 | 632.8265 | 1264.646 | 3.66  | 0.00231  | 5.300094 |
| P00450 | 1 | 1      | 974.7965 | 2922.375 | 2.5   | 0.00243  | 6.809644 |
| P00450 | 0 | 1      | 602.2694 | 1203.531 | 3.13  | 0.00188  | 5.035251 |
| P00450 | 0 | 0.8605 | 594.8311 | 1188.655 | 3.83  | 0.00227  | 39.59385 |
| P00450 | 0 | 1      | 509.2362 | 1017.465 | 1.57  | 0.0008   | 15.31666 |
| P00450 | 0 | 0.7333 | 705.6195 | 2819.456 | 2.32  | 0.00164  | 9.356141 |
| P00450 | 1 | 0.8667 | 471.7309 | 1883.902 | 2.28  | 0.00107  | 7.773092 |
| P00450 | 0 | 0.9231 | 525.9194 | 1575.744 | 1.8   | 0.00095  | 18.44185 |
| P00450 | 0 | 0.7297 | 740.4313 | 1479.855 | 4.69  | 0.00347  | 37.03231 |
| P00450 | 0 | 0.9429 | 490.2773 | 1468.817 | 1.65  | 0.00081  | 9.253293 |
| P00450 | 0 | 0.7925 | 748.4236 | 1495.84  | -2.24 | -0.00168 | 0        |
| P00450 | 0 | 1      | 674.3192 | 1347.631 | 1.06  | 0.00072  | 45.57521 |
| P00450 | 0 | 1      | 449.8821 | 1347.632 | 1.39  | 0.00063  | 37.55172 |
| P00450 | 1 | 0.8333 | 500.5143 | 1999.035 | 0.51  | 0.00026  | 23.96867 |
| P00450 | 0 | 0.9565 | 488.2549 | 1462.75  | 0.87  | 0.00042  | 17.34964 |
| P00450 | 1 | 0.84   | 500.5153 | 1999.039 | 2.47  | 0.00123  | 8.39565  |
| P00450 | 0 | 1      | 651.3192 | 1301.631 | 1.89  | 0.00123  | 6.318223 |
| P00450 | 0 | 1      | 674.3201 | 1347.633 | 2.42  | 0.00163  | 2.63369  |
| P00450 | 1 | 1      | 1000.023 | 1999.039 | 2.36  | 0.00236  | 2.108837 |
| P00450 | 1 | 1      | 538.5012 | 2688.477 | 3.21  | 0.00172  | 17.27626 |
| P00450 | 0 | 1      | 490.2787 | 1468.821 | 4.33  | 0.00212  | 90.85908 |



|        |   |        |          |          |       |          |          |
|--------|---|--------|----------|----------|-------|----------|----------|
| P00450 | 0 | 1      | 488.2552 | 1462.751 | 1.3   | 0.00064  | 8.839616 |
| P00450 | 1 | 0.0556 | 618.9842 | 1854.938 | 3.07  | 0.0019   | 4.993354 |
| P00450 | 1 | 0.9091 | 896.8301 | 2688.476 | 2.83  | 0.00254  | 8.922627 |
| P00450 | 1 | 0.8667 | 727.3489 | 2906.374 | 0.38  | 0.00027  | 3.014759 |
| P00450 | 1 | 0.8966 | 618.9828 | 1854.934 | 0.8   | 0.00049  | 26.0316  |
| P00450 | 0 | 0.8485 | 586.9835 | 1758.936 | 3.51  | 0.00206  | 63.07257 |
| P00450 | 1 | 0.8966 | 618.9828 | 1854.934 | 0.8   | 0.00049  | 26.0316  |
| P00450 | 0 | 0.931  | 449.8824 | 1347.633 | 2.14  | 0.00096  | 5.200198 |
| P00450 | 0 | 1      | 699.3067 | 1397.606 | 0.83  | 0.00058  | 0        |
| P00450 | 0 | 0.6154 | 705.619  | 2819.454 | 1.63  | 0.00115  | 12.77    |
| P00450 | 0 | 1      | 931.7817 | 2793.33  | 0.9   | 0.00084  | 1.699859 |
| P00450 | 0 | 0.9677 | 586.9833 | 1758.935 | 3.2   | 0.00188  | 2.912965 |
| P00450 | 0 | 0.9167 | 705.6196 | 2819.456 | 2.5   | 0.00176  | 38.67909 |
| P00450 | 0 | 0.8148 | 396.8897 | 1188.654 | 3.53  | 0.0014   | 10.85422 |
| P00450 | 0 | 1      | 505.2484 | 1513.731 | 3.02  | 0.00152  | 8.54055  |
| P00450 | 1 | 0.9143 | 667.0195 | 1999.044 | 4.73  | 0.00315  | 3.584926 |
| P00450 | 0 | 0.7778 | 422.2197 | 1264.645 | 2.66  | 0.00112  | 72.40382 |
| P00450 | 1 | 1      | 672.8741 | 2688.475 | 2.39  | 0.00161  | 11.09231 |
| P00450 | 1 | 1      | 667.0186 | 1999.041 | 3.36  | 0.00224  | 23.38348 |
| P00450 | 0 | 0.55   | 422.2188 | 1264.642 | 0.56  | 0.00023  | 21.22042 |
| P00450 | 0 | 1      | 509.2367 | 1017.466 | 2.47  | 0.00126  | 19.66953 |
| P00450 | 1 | 0.9524 | 667.0172 | 1999.037 | 1.34  | 0.0009   | 0        |
| P00450 | 0 | 1      | 509.2357 | 1017.464 | 0.55  | 0.00028  | 6.67155  |
| P00450 | 0 | 1      | 699.3074 | 1397.607 | 1.79  | 0.00125  | 0        |
| P00450 | 0 | 0.8378 | 594.8304 | 1188.654 | 2.8   | 0.00166  | 12.774   |
| P00450 | 0 | 1      | 434.5487 | 1301.631 | 2.24  | 0.00097  | 16.7112  |
| P00450 | 0 | 0.8222 | 686.3879 | 1371.768 | 3.94  | 0.0027   | 30.87147 |
| P00450 | 0 | 0.6875 | 422.2197 | 1264.645 | 2.66  | 0.00112  | 30.70127 |
| P00450 | 0 | 0.5769 | 499.2868 | 1495.846 | 1.75  | 0.00087  | 0        |
| P00450 | 1 | 0.8148 | 667.0178 | 1999.039 | 2.26  | 0.00151  | 10.44033 |
| P00450 | 1 | 1      | 471.7312 | 1883.903 | 3.05  | 0.00144  | 33.6981  |
| P00450 | 0 | 0.9487 | 716.3253 | 1431.643 | 3.19  | 0.00229  | 0        |
| P00450 | 0 | 0.9231 | 788.3754 | 1575.743 | 1.73  | 0.00136  | 2.933596 |
| P00450 | 1 | 0.7083 | 667.0176 | 1999.038 | 1.89  | 0.00126  | 9.228986 |
| P00450 | 0 | 0.875  | 525.919  | 1575.742 | 1.1   | 0.00058  | 4.901604 |
| P00450 | 0 | 0.9302 | 686.3875 | 1371.768 | 3.32  | 0.00227  | 0        |
| P00450 | 1 | 0.8182 | 628.637  | 1883.897 | -0.44 | -0.00028 | 41.99125 |
| P00450 | 0 | 0.2    | 940.4899 | 2819.455 | 2.07  | 0.00194  | 4.724482 |
| P00450 | 0 | 0.4706 | 422.219  | 1264.642 | 0.92  | 0.00039  | 53.66337 |
| P00450 | 0 | 0      | 940.4904 | 2819.457 | 2.59  | 0.00243  | 8.52035  |
| P00450 | 0 | 1      | 505.2471 | 1513.727 | 0.54  | 0.00027  | 16.5705  |
| P00450 | 0 | 1      | 785.8976 | 3140.569 | 1.05  | 0.00082  | 0        |
| P00450 | 0 | 0.75   | 493.5877 | 1478.749 | 3.14  | 0.00155  | 9.698661 |
| P00450 | 0 | 0.9048 | 449.8828 | 1347.634 | 3.09  | 0.00139  | 8.997388 |
| P00450 | 0 | 0.92   | 442.2438 | 1324.717 | 2.92  | 0.00129  | 21.13564 |
| P00450 | 1 | 0.7308 | 577.9544 | 1731.849 | 3.94  | 0.00228  | 7.456669 |
| P00450 | 0 | 0.7368 | 731.8792 | 1462.751 | 1.37  | 0.00101  | 12.10836 |
| P00747 | 1 | 1      | 730.5664 | 3648.803 | 1.28  | 0.00094  | 4.895686 |
| P00747 | 1 | 0.9167 | 912.9573 | 3648.808 | 2.54  | 0.00232  | 11.91792 |
| P00747 | 1 | 1      | 730.567  | 3648.806 | 2.04  | 0.00149  | 3.862627 |
| P00747 | 1 | 1      | 912.957  | 3648.806 | 2.21  | 0.00201  | 0.579091 |
| P00747 | 0 | 1      | 1175.883 | 3525.635 | 1.9   | 0.00223  | 3.518208 |

|            |   |        |          |          |       |          |          |
|------------|---|--------|----------|----------|-------|----------|----------|
| P00747     | 0 | 1      | 882.1637 | 3525.633 | 1.22  | 0.00107  | 3.652641 |
| P00747     | 0 | 1      | 676.1271 | 3376.606 | 1.5   | 0.00101  | 40.21682 |
| P00747     | 0 | 1      | 1126.207 | 3376.608 | 1.9   | 0.00214  | 4.232334 |
| P00747     | 0 | 1      | 844.907  | 3376.606 | 1.52  | 0.00128  | 4.722673 |
| P00747     | 0 | 1      | 844.907  | 3376.606 | 1.45  | 0.00122  | 5.7482   |
| P00747     | 0 | 1      | 882.1637 | 3525.633 | 1.22  | 0.00107  | 3.497389 |
| P00747     | 1 | 0.9444 | 463.5806 | 1388.727 | 3.47  | 0.0016   | 3.494759 |
| P00747     | 1 | 0.8814 | 463.5799 | 1388.725 | 1.82  | 0.00084  | 3.857638 |
| P00747     | 1 | 1      | 598.3007 | 1792.888 | 2.85  | 0.0017   | 6.877428 |
| P00747     | 0 | 1      | 452.2418 | 1354.711 | 0.8   | 0.00036  | 0.029963 |
| P00747     | 0 | 1      | 512.8996 | 1536.684 | 2.5   | 0.00128  | 2.494043 |
| P00747     | 0 | 0.9388 | 481.5888 | 1442.752 | 0.59  | 0.00028  | 2.695117 |
| P00747     | 0 | 0.8269 | 507.5675 | 1520.688 | 1.57  | 0.0008   | 4.444267 |
| P00747     | 0 | 1      | 481.5885 | 1442.751 | 0.14  | 0.00007  | 6.999498 |
| P00747     | 0 | 0.875  | 507.5673 | 1520.687 | 1.15  | 0.00058  | 44.91856 |
| P00747     | 0 | 1      | 481.5904 | 1442.757 | 4.08  | 0.00196  | 36.5256  |
| P00747     | 0 | 1      | 721.8804 | 1442.754 | 1.91  | 0.00137  | 3.323581 |
| P00747     | 1 | 1      | 486.9495 | 1458.834 | -0.76 | -0.00037 | 24.86668 |
| P00747     | 1 | 1      | 703.3706 | 2108.097 | 1.1   | 0.00077  | 5.120021 |
| P00747     | 1 | 1      | 527.7796 | 2108.097 | 0.78  | 0.00041  | 3.422945 |
| P00747     | 0 | 0.9385 | 958.017  | 1915.027 | 2.09  | 0.002    | 2.786434 |
| P00747     | 0 | 0.9508 | 639.0132 | 1915.025 | 1.16  | 0.00074  | 2.415774 |
| P00747     | 0 | 0.9107 | 744.6068 | 2975.405 | 1.13  | 0.00084  | 3.812641 |
| P00747     | 0 | 1      | 880.814  | 2640.427 | 1.81  | 0.00159  | 14.32488 |
| P00747     | 0 | 1      | 660.8622 | 2640.427 | 1.73  | 0.00114  | 3.22368  |
| P00747     | 0 | 0.9873 | 880.8138 | 2640.427 | 1.67  | 0.00147  | 2.613445 |
| P00747     | 0 | 0.9836 | 660.8619 | 2640.426 | 1.27  | 0.00084  | 2.355811 |
| P00747     | 0 | 1      | 783.8793 | 1566.751 | 1.37  | 0.00107  | 3.440332 |
| P00747     | 0 | 1      | 660.8631 | 2640.431 | 3.03  | 0.002    | 5.836783 |
| P00747     | 0 | 1      | 651.337  | 1951.996 | 1.3   | 0.00085  | 4.381309 |
| P00747     | 0 | 0.975  | 806.4035 | 2417.196 | 1.32  | 0.00107  | 11.92917 |
| P00747     | 0 | 1      | 854.4384 | 2561.301 | 2.22  | 0.0019   | 3.00357  |
| P00747     | 0 | 1      | 792.1512 | 3165.583 | 8.43  | 0.00667  | 19.60836 |
| Q02325; PC | 0 | 1      | 513.2464 | 1537.725 | 1.77  | 0.00091  | 8.781481 |
| P00747     | 0 | 1      | 808.0349 | 2422.09  | 1.67  | 0.00135  | 4.347972 |
| Q02325; PC | 0 | 1      | 769.3662 | 1537.725 | 2.02  | 0.00155  | 3.467448 |
| Q02325; PC | 0 | 1      | 513.2459 | 1537.723 | 0.82  | 0.00042  | 28.60907 |
| P00747     | 0 | 1      | 808.0341 | 2422.088 | 0.69  | 0.00056  | 3.99156  |
| Q02325; PC | 0 | 0.9351 | 761.3681 | 1521.729 | 1.26  | 0.00096  | 3.723963 |
| Q02325; PC | 0 | 0.875  | 507.9149 | 1521.73  | 1.98  | 0.001    | 3.228438 |
| P00747     | 0 | 0.8909 | 642.8688 | 1284.73  | 1.79  | 0.00115  | 39.82595 |
| Q02325; PC | 0 | 0.8372 | 507.9146 | 1521.729 | 1.43  | 0.00073  | 11.80114 |
| P00747     | 1 | 1      | 645.3038 | 2578.194 | 2.5   | 0.00161  | 0        |
| P00747     | 0 | 0.9672 | 854.4377 | 2561.299 | 1.51  | 0.00129  | 26.36061 |
| P00747     | 1 | 1      | 860.0683 | 2578.19  | 1.27  | 0.00109  | 2.942597 |
| P00747     | 0 | 0.9388 | 691.3762 | 1381.745 | 2.31  | 0.00159  | 5.08467  |
| P00747     | 0 | 1      | 714.9196 | 1428.832 | 1.26  | 0.0009   | 6.917108 |
| P00747     | 0 | 0.9038 | 476.9483 | 1428.83  | 0.22  | 0.00011  | 8.36368  |
| P00747     | 1 | 1      | 486.9507 | 1458.837 | 1.63  | 0.00079  | 12.34657 |
| P00747     | 0 | 1      | 1050.525 | 3149.562 | 0.1   | 0.00011  | 0        |
| P00747     | 0 | 1      | 788.1453 | 3149.559 | -0.66 | -0.00052 | 22.21599 |
| P00747     | 0 | 1      | 854.4377 | 2561.299 | 1.44  | 0.00123  | 8.06766  |

|            |   |        |          |          |       |          |          |
|------------|---|--------|----------|----------|-------|----------|----------|
| P00747     | 0 | 1      | 1281.152 | 2561.296 | 0.44  | 0.00056  | 0        |
| P00747     | 0 | 0.967  | 739.3774 | 1477.748 | 2.64  | 0.00195  | 0        |
| P00747     | 0 | 0.9608 | 541.2877 | 1621.849 | 1.75  | 0.00095  | 8.033704 |
| P00747     | 0 | 0.9605 | 541.2886 | 1621.851 | 3.33  | 0.0018   | 8.39983  |
| P00747     | 0 | 0.9903 | 811.4282 | 1621.849 | 2.02  | 0.00164  | 7.061496 |
| P00747     | 0 | 1      | 760.001  | 2277.988 | 1.97  | 0.0015   | 22.67575 |
| P00747     | 0 | 0.9136 | 659.8961 | 1318.785 | 2.22  | 0.00147  | 7.322577 |
| P00747     | 0 | 1      | 683.9794 | 2049.924 | 1.49  | 0.00102  | 13.0671  |
| P00747     | 0 | 1      | 1025.466 | 2049.925 | 2     | 0.00205  | 0        |
| P00747     | 0 | 1      | 683.979  | 2049.922 | 0.96  | 0.00065  | 67.77734 |
| P00747     | 0 | 0.9216 | 694.6808 | 2082.028 | 1.92  | 0.00133  | 9.263757 |
| P00747     | 0 | 1      | 713.33   | 2137.975 | 1.12  | 0.0008   | 2.39857  |
| P00747     | 0 | 1      | 568.2732 | 2270.071 | -1.36 | -0.00077 | 13.89618 |
| P00747     | 0 | 0.9355 | 535.2493 | 2137.975 | 1.2   | 0.00064  | 28.11711 |
| P00747     | 0 | 1      | 568.2754 | 2270.08  | 2.51  | 0.00142  | 2.780312 |
| P00747     | 0 | 1      | 757.3637 | 2270.077 | 1.12  | 0.00084  | 2.605635 |
| P00747     | 0 | 1      | 614.8353 | 1228.663 | 0.77  | 0.00047  | 49.98136 |
| P00747     | 0 | 0.9149 | 759.8026 | 1518.598 | 1.39  | 0.00105  | 3.557089 |
| P00747     | 0 | 0.9111 | 476.9482 | 1428.83  | -0.1  | -0.00005 | 18.68519 |
| P00747     | 0 | 0.8889 | 772.7379 | 2316.199 | 2.15  | 0.00166  | 3.467148 |
| P00747     | 0 | 0.9841 | 579.8046 | 2316.197 | 1.14  | 0.00066  | 2.971408 |
| P00747     | 0 | 0.9296 | 772.7374 | 2316.198 | 1.59  | 0.00123  | 4.763189 |
| P00747     | 0 | 1      | 759.8024 | 1518.597 | 1.15  | 0.00087  | 2.512161 |
| P00747     | 1 | 1      | 784.3832 | 2351.135 | 0.99  | 0.00078  | 3.662739 |
| P00747     | 1 | 0.9394 | 474.2664 | 1894.044 | 0.49  | 0.00023  | 13.24818 |
| P00747     | 0 | 0.9036 | 587.8457 | 1174.684 | 3.55  | 0.00208  | 26.21953 |
| P00747     | 0 | 0.9833 | 694.6807 | 2082.028 | 1.83  | 0.00127  | 6.399704 |
| P00747     | 0 | 1      | 506.8709 | 1518.598 | 1.68  | 0.00085  | 0        |
| P00747     | 0 | 0.973  | 534.2643 | 1600.778 | 0.88  | 0.00047  | 0        |
| P00747     | 0 | 1      | 534.2653 | 1600.781 | 2.71  | 0.00145  | 2.800555 |
| P00747     | 0 | 0.9672 | 578.7842 | 1156.561 | 2.99  | 0.00173  | 6.694562 |
| P00747     | 1 | 1      | 586.2994 | 1756.884 | 3.07  | 0.0018   | 2.029201 |
| P00747     | 0 | 0.9167 | 616.8159 | 1232.625 | 2.56  | 0.00158  | 3.412278 |
| P00747     | 0 | 1      | 660.8616 | 2640.425 | 0.81  | 0.00053  | 20.54673 |
| Q02325; PC | 0 | 1      | 513.2466 | 1537.725 | 2.13  | 0.00109  | 6.229238 |
| Q02325; Q1 | 0 | 0.8    | 584.823  | 1168.639 | 2.92  | 0.00171  | 12.57676 |
| P00747     | 1 | 1      | 538.2646 | 1612.779 | 1.92  | 0.00103  | 9.582102 |
| Q02325; PC | 0 | 0.8824 | 689.3164 | 1377.626 | 0.43  | 0.0003   | 0        |
| P00747     | 0 | 0.641  | 411.5462 | 1232.624 | 2.15  | 0.00088  | 3.035464 |
| P00747     | 0 | 0.9167 | 641.0834 | 2561.312 | 6.58  | 0.00421  | 44.3318  |
| P00747     | 0 | 0.9024 | 440.2664 | 1318.785 | 1.96  | 0.00086  | 10.54698 |
| P00747     | 0 | 1      | 614.2825 | 1227.558 | 2.72  | 0.00167  | 2.705444 |
| P00747     | 0 | 1      | 614.2819 | 1227.557 | 1.73  | 0.00106  | 3.260478 |
| Q15195; PC | 1 | 0.9167 | 475.6111 | 1424.819 | 0.93  | 0.00044  | 26.07081 |
| P00747     | 0 | 1      | 579.8057 | 2316.201 | 3.04  | 0.00176  | 53.3778  |
| P00747     | 1 | 0.8571 | 411.6152 | 1232.831 | 0.77  | 0.00032  | 23.10683 |
| P00747     | 0 | 0.9783 | 640.8325 | 1280.658 | 2.38  | 0.00152  | 6.1394   |
| P00747     | 0 | 0.9429 | 579.8061 | 2316.203 | 3.67  | 0.00212  | 14.0905  |
| P00747     | 0 | 1      | 409.8572 | 1227.557 | 1.99  | 0.00081  | 15.82752 |
| Q02325; Q1 | 0 | 0.5833 | 390.2174 | 1168.638 | 2.1   | 0.00082  | 27.11907 |
| P00747     | 0 | 1      | 800.8936 | 1600.78  | 1.73  | 0.00138  | 29.56833 |
| P00747     | 1 | 1      | 439.9757 | 1756.881 | 1.61  | 0.00071  | 20.73718 |

|            |   |        |          |          |       |          |          |
|------------|---|--------|----------|----------|-------|----------|----------|
| P00747     | 0 | 1      | 481.5891 | 1442.753 | 1.22  | 0.00059  | 32.79889 |
| P00747     | 0 | 0.963  | 481.589  | 1442.752 | 1.09  | 0.00053  | 72.65716 |
| P00747     | 0 | 1      | 1211.549 | 2422.091 | 2.13  | 0.00258  | 5.020582 |
| P00747     | 0 | 0.8222 | 411.5459 | 1232.623 | 1.48  | 0.00061  | 4.400372 |
| P00747     | 0 | 0.6923 | 759.9997 | 2277.985 | 0.28  | 0.00021  | 0        |
| P00747     | 0 | 1      | 614.2817 | 1227.556 | 1.33  | 0.00082  | 13.94768 |
| P00747     | 0 | 0.9667 | 808.0374 | 2422.098 | 4.85  | 0.00391  | 14.40323 |
| P00747     | 0 | 1      | 759.8032 | 1518.599 | 2.19  | 0.00166  | 0        |
| P00747     | 0 | 0.9783 | 434.2262 | 1300.664 | 3.18  | 0.00138  | 9.721385 |
| P00747     | 0 | 0.8261 | 481.5898 | 1442.755 | 2.87  | 0.00138  | 54.97773 |
| P00747     | 0 | 1      | 506.8715 | 1518.6   | 2.83  | 0.00143  | 0        |
| P00747     | 0 | 0.9    | 493.2537 | 1477.746 | 1.85  | 0.00091  | 30.06171 |
| Q15195; PC | 0 | 0.6585 | 569.3429 | 1137.679 | 2.41  | 0.00137  | 4.224358 |
| P00747     | 0 | 1      | 687.752  | 1374.497 | 2.25  | 0.00155  | 3.964253 |
| P00747     | 1 | 0.7647 | 448.9766 | 1792.885 | 1.14  | 0.00051  | 48.01406 |
| Q15195; PC | 0 | 0.6364 | 569.3433 | 1137.679 | 3.16  | 0.0018   | 14.98462 |
| Q02325; Q1 | 0 | 0.8182 | 584.8233 | 1168.639 | 3.44  | 0.00201  | 7.360862 |
| P00747     | 0 | 1      | 534.2646 | 1600.779 | 1.34  | 0.00071  | 25.1992  |
| P00747     | 0 | 0.7407 | 476.9487 | 1428.831 | 0.99  | 0.00047  | 12.95988 |
| P00747     | 0 | 0.95   | 616.8146 | 1232.622 | 0.38  | 0.00023  | 3.19825  |
| Q02325; PC | 0 | 0.9756 | 689.3164 | 1377.625 | 0.34  | 0.00023  | 17.78435 |
| P00747     | 1 | 1      | 860.0686 | 2578.191 | 1.63  | 0.0014   | 1.81482  |
| P00747     | 0 | 1      | 614.2816 | 1227.556 | 1.13  | 0.00069  | 0        |
| P00747     | 1 | 0.8261 | 463.5798 | 1388.725 | 1.62  | 0.00075  | 33.17683 |
| P00747     | 0 | 0.9512 | 650.8346 | 1300.662 | 1.62  | 0.00105  | 6.612808 |
| P00747     | 0 | 0.9211 | 554.8056 | 1108.604 | 1.48  | 0.00082  | 9.773003 |
| Q02325; PC | 0 | 1      | 513.2463 | 1537.724 | 1.65  | 0.00085  | 12.06906 |
| P00747     | 0 | 1      | 542.23   | 1083.453 | 0.28  | 0.00015  | 20.15745 |
| P00747     | 0 | 1      | 433.5553 | 1298.651 | 1.98  | 0.00086  | 9.238378 |
| Q02325; Q1 | 0 | 0.5833 | 390.2172 | 1168.637 | 1.55  | 0.00061  | 10.91142 |
| P00747     | 0 | 1      | 452.2422 | 1354.712 | 1.81  | 0.00082  | 18.0479  |
| P00747     | 0 | 0.9429 | 691.3756 | 1381.744 | 1.51  | 0.00105  | 0        |
| P00747     | 0 | 1      | 488.7545 | 1951.996 | 1.23  | 0.0006   | 8.990506 |
| P00747     | 0 | 1      | 808.0363 | 2422.094 | 3.49  | 0.00281  | 6.695964 |
| Q02325; PC | 0 | 1      | 513.2466 | 1537.725 | 2.25  | 0.00115  | 59.04612 |
| P00747     | 0 | 1      | 543.7791 | 2172.095 | 1.22  | 0.00066  | 54.74105 |
| P00747     | 0 | 1      | 481.5891 | 1442.753 | 1.41  | 0.00068  | 53.9159  |
| P00747     | 1 | 0.4615 | 431.2716 | 1291.8   | 2.05  | 0.00088  | 26.72187 |
| P00747     | 0 | 0.8043 | 544.765  | 1088.523 | 3.13  | 0.00171  | 5.396366 |
| P00747     | 0 | 0.96   | 427.5569 | 1280.656 | 1.08  | 0.00046  | 13.96915 |
| P00747     | 0 | 0.7778 | 595.887  | 2975.406 | 1.41  | 0.00084  | 33.00044 |
| P00747     | 0 | 1      | 808.0319 | 2422.081 | -1.96 | -0.00158 | 23.8973  |
| P00747     | 0 | 1      | 409.8572 | 1227.557 | 1.99  | 0.00081  | 24.90139 |
| P00747     | 0 | 1      | 542.2302 | 1083.453 | 0.62  | 0.00033  | 0        |
| P00747     | 0 | 0.9    | 440.2658 | 1318.783 | 0.64  | 0.00028  | 58.24977 |
| P00747     | 0 | 0.8214 | 659.8959 | 1318.784 | 1.85  | 0.00122  | 13.02505 |
| P00747     | 0 | 1      | 759.8037 | 1518.6   | 2.83  | 0.00215  | 33.44288 |
| Q02325; Q1 | 0 | 0.44   | 390.2168 | 1168.636 | 0.38  | 0.00015  | 14.30095 |
| P00747     | 0 | 1      | 808.0354 | 2422.092 | 2.35  | 0.0019   | 8.092862 |
| P00747     | 1 | 1      | 729.9213 | 1458.835 | 0.15  | 0.00011  | 6.708826 |
| P00747     | 0 | 1      | 427.5574 | 1280.658 | 2.22  | 0.00095  | 8.818822 |
| P00747     | 1 | 1      | 588.5406 | 2351.141 | 3.27  | 0.00192  | 8.100157 |

|        |   |        |          |          |       |          |          |
|--------|---|--------|----------|----------|-------|----------|----------|
| P00747 | 0 | 1      | 409.8571 | 1227.557 | 1.84  | 0.00075  | 36.23005 |
| P02768 | 0 | 0.871  | 733.7176 | 2199.138 | 1.1   | 0.00081  | 21.3637  |
| P02768 | 0 | 0.907  | 733.7178 | 2199.139 | 1.43  | 0.00105  | 10.30752 |
| P02768 | 0 | 0.6279 | 549.617  | 1646.836 | 1.61  | 0.00088  | 18.50071 |
| P02768 | 0 | 0.7759 | 549.6168 | 1646.836 | 1.28  | 0.0007   | 8.822502 |
| P02768 | 0 | 1      | 823.9217 | 1646.836 | 1.4   | 0.00115  | 6.772108 |
| P02768 | 0 | 1      | 649.325  | 1945.96  | 1.91  | 0.00124  | 30.70978 |
| P02768 | 0 | 0.7692 | 549.6164 | 1646.835 | 0.5   | 0.00027  | 48.32998 |
| P02768 | 0 | 1      | 823.9234 | 1646.84  | 3.47  | 0.00286  | 13.53656 |
| P02768 | 2 | 1      | 580.8442 | 2320.355 | 3.03  | 0.00176  | 2.231667 |
| P02768 | 2 | 1      | 580.8442 | 2320.355 | 3.03  | 0.00176  | 2.231667 |
| P02768 | 2 | 1      | 580.8442 | 2320.355 | 3.03  | 0.00176  | 2.231667 |
| P02768 | 0 | 0.8485 | 644.9079 | 1288.809 | 0.52  | 0.00034  | 4.788717 |
| P02768 | 0 | 1      | 558.4926 | 2230.949 | 4.05  | 0.00226  | 15.2604  |
| P02768 | 0 | 1      | 893.8962 | 1786.785 | 1.47  | 0.00131  | 0        |
| P02768 | 1 | 0.8846 | 460.619  | 1379.843 | 1.49  | 0.00068  | 17.70241 |
| P02768 | 0 | 1      | 821.8445 | 1642.682 | 0.79  | 0.00065  | 0        |
| P02768 | 1 | 1      | 644.6516 | 1931.94  | 1.15  | 0.00074  | 0        |
| P02768 | 1 | 0.88   | 448.6027 | 1343.794 | 0.74  | 0.00033  | 7.348913 |
| P02768 | 0 | 0.8043 | 549.616  | 1646.833 | -0.28 | -0.00015 | 0        |
| P02768 | 0 | 0.7843 | 549.6169 | 1646.836 | 1.5   | 0.00082  | 5.454378 |
| P02768 | 0 | 0.8364 | 549.6162 | 1646.834 | 0.17  | 0.00009  | 0        |
| P02768 | 0 | 0.8    | 549.6172 | 1646.837 | 1.95  | 0.00107  | 14.95914 |
| P02768 | 0 | 0.7391 | 549.6169 | 1646.836 | 1.5   | 0.00082  | 7.448346 |
| P02768 | 0 | 0.8594 | 544.2855 | 1630.842 | 1.8   | 0.00098  | 0        |
| P02768 | 0 | 1      | 1088.191 | 3262.559 | 3.17  | 0.00344  | 0        |
| P02768 | 0 | 0.7442 | 544.2846 | 1630.839 | 0.12  | 0.00006  | 0        |
| P02768 | 0 | 0.9896 | 815.9249 | 1630.842 | 2.19  | 0.00178  | 2.43451  |
| P02768 | 0 | 0.875  | 544.2852 | 1630.841 | 1.35  | 0.00074  | 2.697887 |
| P02768 | 0 | 1      | 815.9241 | 1630.841 | 1.21  | 0.00099  | 5.672572 |
| P02768 | 0 | 0.8644 | 544.2853 | 1630.841 | 1.47  | 0.0008   | 7.664101 |
| P02768 | 0 | 1      | 815.9226 | 1630.838 | -0.58 | -0.00048 | 5.110016 |
| P02768 | 0 | 0.8806 | 544.2844 | 1630.839 | -0.22 | -0.00012 | 6.372628 |
| P02768 | 0 | 0.9388 | 815.9256 | 1630.844 | 3.08  | 0.00251  | 0        |
| P02768 | 0 | 0.8438 | 544.2848 | 1630.84  | 0.57  | 0.00031  | 0        |
| P02768 | 1 | 1      | 537.9871 | 1611.947 | 1.05  | 0.00056  | 17.51748 |
| P02768 | 1 | 0.9623 | 489.9529 | 1467.844 | 0.7   | 0.00034  | 4.440347 |
| P02768 | 1 | 0.7391 | 403.7423 | 1611.947 | 1.34  | 0.00054  | 8.245259 |
| P02768 | 1 | 0.7442 | 403.7423 | 1611.948 | 1.49  | 0.0006   | 2.568454 |
| P02768 | 1 | 1      | 537.9867 | 1611.946 | 0.25  | 0.00014  | 3.542316 |
| P02768 | 1 | 1      | 537.9872 | 1611.947 | 1.28  | 0.00069  | 21.85099 |
| P02768 | 1 | 1      | 537.9874 | 1611.948 | 1.5   | 0.00081  | 3.857814 |
| P02768 | 1 | 1      | 537.987  | 1611.946 | 0.82  | 0.00044  | 4.672218 |
| P02768 | 0 | 0.8974 | 733.717  | 2199.137 | 0.35  | 0.00026  | 3.277838 |
| P02768 | 0 | 1      | 733.7169 | 2199.136 | 0.18  | 0.00013  | 8.457705 |
| P02768 | 0 | 0.9286 | 733.717  | 2199.137 | 0.35  | 0.00026  | 3.277838 |
| P02768 | 0 | 0.9032 | 733.7175 | 2199.138 | 0.93  | 0.00068  | 20.36963 |
| P02768 | 0 | 0.9143 | 685.6838 | 2055.037 | 1.57  | 0.00107  | 3.619745 |
| P02768 | 0 | 0.8837 | 550.5397 | 2199.137 | 0.59  | 0.00033  | 3.605744 |
| P02768 | 0 | 0.8929 | 550.54   | 2199.138 | 1.04  | 0.00057  | 24.56736 |
| P02768 | 0 | 0.9394 | 550.5402 | 2199.139 | 1.37  | 0.00075  | 5.131604 |
| P02768 | 0 | 0.9245 | 733.7178 | 2199.139 | 1.35  | 0.00099  | 3.673026 |

|        |   |        |          |          |       |          |          |
|--------|---|--------|----------|----------|-------|----------|----------|
| P02768 | 0 | 0.8    | 719.4133 | 1437.819 | 0.08  | 0.00006  | 5.628948 |
| P02768 | 0 | 0.9825 | 479.945  | 1437.82  | 0.92  | 0.00044  | 7.775204 |
| P02768 | 0 | 0.9254 | 719.4133 | 1437.819 | 0.17  | 0.00012  | 5.613877 |
| P02768 | 0 | 0.9434 | 479.9448 | 1437.82  | 0.48  | 0.00023  | 7.297089 |
| P02768 | 0 | 1      | 823.9223 | 1646.837 | 2.14  | 0.00176  | 21.19716 |
| P02768 | 0 | 0.7843 | 649.3251 | 1945.961 | 2.09  | 0.00136  | 5.278109 |
| P02768 | 0 | 1      | 973.4839 | 1945.961 | 1.91  | 0.00186  | 4.78686  |
| P02768 | 0 | 1      | 649.3241 | 1945.958 | 0.49  | 0.00032  | 6.30794  |
| P02768 | 1 | 0.8889 | 489.9527 | 1467.843 | 0.27  | 0.00013  | 56.08204 |
| P02768 | 1 | 0.9216 | 643.3865 | 1928.145 | 1.56  | 0.001    | 21.80333 |
| P02768 | 1 | 0.766  | 472.973  | 1416.904 | 1.14  | 0.00054  | 5.472119 |
| P02768 | 1 | 0.766  | 472.973  | 1416.904 | 1.14  | 0.00054  | 5.472119 |
| P02768 | 1 | 1      | 643.3864 | 1928.145 | 1.46  | 0.00094  | 30.8559  |
| P02768 | 0 | 1      | 596.2678 | 1786.789 | 3.55  | 0.00211  | 0        |
| P02768 | 0 | 0.9588 | 653.3171 | 3262.556 | 2.35  | 0.00154  | 1.038449 |
| P02768 | 0 | 0.99   | 1088.192 | 3262.563 | 4.29  | 0.00466  | 5.510254 |
| P02768 | 1 | 1      | 537.9866 | 1611.945 | 0.14  | 0.00008  | 30.72844 |
| P02768 | 0 | 0.8714 | 820.3919 | 3278.546 | 0.62  | 0.00051  | 4.463821 |
| P02768 | 0 | 1      | 1093.523 | 3278.554 | 3.06  | 0.00335  | 0        |
| P02768 | 0 | 0.8269 | 820.3926 | 3278.549 | 1.59  | 0.0013   | 0.894572 |
| P02768 | 0 | 1      | 558.4915 | 2230.944 | 2.08  | 0.00116  | 0        |
| P02768 | 1 | 1      | 643.3865 | 1928.145 | 1.65  | 0.00106  | 16.6461  |
| P02768 | 1 | 1      | 643.3862 | 1928.144 | 1.08  | 0.00069  | 6.089679 |
| P02768 | 1 | 1      | 482.7914 | 1928.144 | 1.01  | 0.00049  | 3.559402 |
| P02768 | 1 | 1      | 964.5762 | 1928.145 | 1.72  | 0.00166  | 5.087317 |
| P02768 | 1 | 1      | 643.3856 | 1928.142 | 0.23  | 0.00014  | 6.46519  |
| P02768 | 1 | 1      | 482.7925 | 1928.148 | 3.35  | 0.00162  | 21.36076 |
| P02768 | 1 | 1      | 643.3915 | 1928.16  | 9.34  | 0.006    | 36.09347 |
| P02768 | 0 | 1      | 893.8964 | 1786.786 | 1.68  | 0.0015   | 2.820012 |
| P02768 | 0 | 1      | 596.2673 | 1786.787 | 2.73  | 0.00162  | 7.067748 |
| P02768 | 0 | 1      | 744.3204 | 2230.947 | 3.12  | 0.00232  | 4.436355 |
| P02768 | 0 | 0.8226 | 653.3753 | 1305.743 | 2.17  | 0.00142  | 22.60959 |
| P02768 | 0 | 1      | 435.9191 | 1305.743 | 1.79  | 0.00078  | 0        |
| P02768 | 0 | 0.9412 | 435.9189 | 1305.742 | 1.16  | 0.0005   | 7.045504 |
| P02768 | 0 | 0.9688 | 435.9187 | 1305.742 | 0.88  | 0.00038  | 7.138199 |
| P02768 | 0 | 0.9    | 653.3757 | 1305.744 | 2.83  | 0.00185  | 14.84928 |
| P02768 | 0 | 0.9412 | 435.9189 | 1305.742 | 1.16  | 0.0005   | 5.825669 |
| P02768 | 0 | 0.7778 | 653.3754 | 1305.743 | 2.27  | 0.00148  | 11.64397 |
| P02768 | 0 | 0.9375 | 435.9186 | 1305.741 | 0.6   | 0.00026  | 6.615524 |
| P02768 | 0 | 0.9818 | 485.9536 | 1455.846 | 1.5   | 0.00073  | 1.54249  |
| P02768 | 0 | 1      | 828.4772 | 1655.947 | 1.34  | 0.00111  | 2.927242 |
| P02768 | 0 | 1      | 733.7159 | 2199.133 | -1.15 | -0.00084 | 60.95162 |
| P02768 | 0 | 1      | 552.6542 | 1655.948 | 2     | 0.0011   | 4.395019 |
| P02768 | 1 | 1      | 595.353  | 1784.045 | 2.65  | 0.00157  | 3.641001 |
| P02768 | 1 | 1      | 643.3867 | 1928.146 | 1.93  | 0.00124  | 13.14684 |
| P02768 | 1 | 0.619  | 521.0068 | 1561.006 | 0.69  | 0.00036  | 9.167002 |
| P02768 | 1 | 0.6562 | 391.0069 | 1561.006 | 0.64  | 0.00025  | 31.00209 |
| P02768 | 1 | 0.5455 | 521.0071 | 1561.007 | 1.16  | 0.0006   | 9.427256 |
| P02768 | 1 | 0.6667 | 781.0068 | 1561.006 | 0.9   | 0.0007   | 8.717592 |
| P02768 | 1 | 0.6154 | 650.9818 | 1950.931 | 0.78  | 0.00051  | 0        |
| P02768 | 1 | 0.6154 | 650.9818 | 1950.931 | 0.78  | 0.00051  | 0        |
| P02768 | 1 | 1      | 595.353  | 1784.045 | 2.65  | 0.00157  | 3.641001 |

|        |   |        |          |          |      |         |          |
|--------|---|--------|----------|----------|------|---------|----------|
| P02768 | 0 | 1      | 596.2669 | 1786.786 | 2.01 | 0.0012  | 8.310125 |
| P02768 | 1 | 1      | 482.7914 | 1928.144 | 1.01 | 0.00049 | 5.38532  |
| P02768 | 1 | 1      | 643.3858 | 1928.143 | 0.51 | 0.00033 | 7.451637 |
| P02768 | 1 | 1      | 482.7912 | 1928.143 | 0.63 | 0.0003  | 19.87566 |
| P02768 | 1 | 1      | 643.3873 | 1928.147 | 2.88 | 0.00185 | 41.33638 |
| P02768 | 0 | 0.9535 | 980.1622 | 2938.472 | 1.37 | 0.00134 | 4.230921 |
| P02768 | 0 | 0.9167 | 735.3735 | 2938.472 | 1.35 | 0.00099 | 3.222918 |
| P02768 | 0 | 0.9815 | 735.3735 | 2938.472 | 1.35 | 0.00099 | 2.546407 |
| P02768 | 0 | 0.8529 | 735.3729 | 2938.47  | 0.52 | 0.00038 | 4.430845 |
| P02768 | 0 | 0.9362 | 778.4389 | 2333.302 | 1.14 | 0.00089 | 4.090406 |
| P02768 | 0 | 0.9362 | 778.4389 | 2333.302 | 1.14 | 0.00089 | 4.090406 |
| P02768 | 0 | 0.8846 | 735.3733 | 2938.471 | 1.1  | 0.00081 | 3.44506  |
| P02768 | 0 | 0.8947 | 980.1629 | 2938.474 | 2.06 | 0.00202 | 3.499089 |
| P02768 | 0 | 0.9231 | 735.3734 | 2938.472 | 1.18 | 0.00087 | 7.363093 |
| P02768 | 0 | 0.9375 | 980.1626 | 2938.473 | 1.75 | 0.00171 | 4.158357 |
| P02768 | 0 | 0.9184 | 735.3731 | 2938.471 | 0.85 | 0.00062 | 2.467205 |
| P02768 | 0 | 0.9429 | 980.1615 | 2938.47  | 0.62 | 0.00061 | 1.557643 |
| P02768 | 0 | 0.9322 | 735.3731 | 2938.471 | 0.85 | 0.00062 | 2.388836 |
| P02768 | 0 | 0.9245 | 735.3734 | 2938.472 | 1.18 | 0.00087 | 3.86522  |
| P02768 | 0 | 1      | 620.1063 | 2477.403 | 0.67 | 0.00042 | 4.946644 |
| P02768 | 0 | 1      | 826.4722 | 2477.402 | 0.16 | 0.00013 | 4.95781  |
| P02768 | 0 | 1      | 826.4724 | 2477.403 | 0.38 | 0.00031 | 4.688102 |
| P02768 | 0 | 1      | 620.1065 | 2477.404 | 1.06 | 0.00066 | 4.122445 |
| P02768 | 0 | 1      | 826.473  | 2477.404 | 1.12 | 0.00092 | 42.86511 |
| P02768 | 0 | 1      | 620.1069 | 2477.406 | 1.75 | 0.00109 | 5.987775 |
| P02768 | 0 | 1      | 826.4728 | 2477.404 | 0.9  | 0.00074 | 38.59062 |
| P02768 | 0 | 0.9697 | 739.3727 | 2954.469 | 1.99 | 0.00147 | 3.378802 |
| P02768 | 0 | 1      | 850.081  | 2548.228 | 0.64 | 0.00054 | 7.304874 |
| P02768 | 0 | 0.8857 | 637.8133 | 2548.231 | 1.78 | 0.00114 | 2.541619 |
| P02768 | 0 | 1      | 850.0814 | 2548.23  | 1.14 | 0.00097 | 1.545759 |
| P02768 | 0 | 0.8182 | 699.3486 | 2794.373 | 2.38 | 0.00166 | 1.65631  |
| P02768 | 0 | 1      | 850.0814 | 2548.23  | 1.07 | 0.00091 | 5.446584 |
| P02768 | 0 | 1      | 637.8133 | 2548.231 | 1.78 | 0.00114 | 31.80723 |
| P02768 | 0 | 1      | 850.0812 | 2548.229 | 0.85 | 0.00073 | 22.62414 |
| P02768 | 0 | 1      | 1016.055 | 2031.103 | 2.27 | 0.00231 | 14.02532 |
| P02768 | 2 | 1      | 551.7893 | 2204.135 | 0.03 | 0.00002 | 11.82606 |
| P02768 | 0 | 0.899  | 758.3395 | 1515.672 | 1.88 | 0.00143 | 5.358093 |
| P02768 | 0 | 0.9677 | 677.7052 | 2031.101 | 1.39 | 0.00094 | 7.472669 |
| P02768 | 0 | 1      | 696.2851 | 2086.841 | 1.53 | 0.00107 | 0.463014 |
| P02768 | 0 | 1      | 522.4655 | 2086.84  | 1.18 | 0.00061 | 0.275699 |
| P02768 | 0 | 1      | 696.2847 | 2086.84  | 1.01 | 0.0007  | 0        |
| P02768 | 1 | 0.8936 | 681.8779 | 1362.748 | 1.29 | 0.00088 | 8.390205 |
| P02768 | 0 | 0.9848 | 636.851  | 1272.695 | 1.64 | 0.00104 | 23.4501  |
| P02768 | 0 | 0.8478 | 682.3554 | 1363.704 | 0.35 | 0.00024 | 4.203078 |
| P02768 | 0 | 1      | 614.2736 | 1840.806 | 2.31 | 0.00142 | 3.627242 |
| P02768 | 0 | 1      | 460.9561 | 1840.803 | 0.41 | 0.00019 | 17.01606 |
| P02768 | 0 | 1      | 614.2729 | 1840.804 | 1.22 | 0.00075 | 6.553154 |
| P02768 | 0 | 1      | 641.8046 | 1282.602 | 1.53 | 0.00098 | 5.355431 |
| P02768 | 0 | 1      | 596.2679 | 1786.789 | 3.65 | 0.00217 | 18.91643 |
| P02768 | 0 | 0.9718 | 830.3897 | 1659.772 | 0.76 | 0.00063 | 5.996527 |
| P02768 | 0 | 0.9583 | 553.9296 | 1659.774 | 2.07 | 0.00115 | 7.297066 |
| P02768 | 0 | 1      | 579.9804 | 1737.926 | 1.47 | 0.00085 | 10.43756 |

|        |   |        |          |          |      |         |          |
|--------|---|--------|----------|----------|------|---------|----------|
| P02768 | 0 | 1      | 579.3555 | 1157.704 | 2.27 | 0.00131 | 1.320563 |
| P02768 | 1 | 0.8611 | 547.5558 | 2187.201 | 0.91 | 0.0005  | 3.55343  |
| P02768 | 1 | 0.88   | 729.7388 | 2187.202 | 1.19 | 0.00087 | 4.621848 |
| P02768 | 1 | 0.8966 | 729.7386 | 2187.201 | 0.86 | 0.00063 | 21.7097  |
| P02768 | 0 | 1      | 455.2398 | 1363.705 | 1.32 | 0.0006  | 7.525749 |
| P02768 | 1 | 0.7143 | 547.5571 | 2187.206 | 3.25 | 0.00178 | 0        |
| P02768 | 1 | 0.8824 | 729.7386 | 2187.201 | 0.86 | 0.00063 | 20.24694 |
| P02768 | 1 | 1      | 681.7046 | 2043.099 | 0.96 | 0.00065 | 39.23035 |
| P02768 | 0 | 1      | 577.9543 | 1731.848 | 1.24 | 0.00071 | 7.592054 |
| P02768 | 0 | 1      | 866.4277 | 1731.848 | 1.1  | 0.00095 | 5.000917 |
| P02768 | 0 | 1      | 577.955  | 1731.851 | 2.5  | 0.00145 | 4.271048 |
| P02768 | 0 | 0.7021 | 620.3278 | 1239.648 | 1.96 | 0.00122 | 6.874068 |
| P02768 | 0 | 0.7442 | 620.3271 | 1239.647 | 0.78 | 0.00049 | 5.200776 |
| P02768 | 0 | 1      | 866.4279 | 1731.849 | 1.38 | 0.0012  | 5.51892  |
| P02768 | 0 | 1      | 744.3187 | 2230.942 | 0.91 | 0.00068 | 2.018012 |
| P02768 | 0 | 1      | 558.4911 | 2230.943 | 1.31 | 0.00073 | 7.571762 |
| P02768 | 0 | 1      | 558.4915 | 2230.944 | 2.08 | 0.00116 | 2.285467 |
| P02768 | 0 | 1      | 744.3188 | 2230.942 | 0.99 | 0.00074 | 1.424317 |
| P02768 | 0 | 1      | 558.4904 | 2230.94  | 0.11 | 0.00006 | 3.343254 |
| P02768 | 0 | 1      | 579.3544 | 1157.701 | 0.37 | 0.00021 | 2.687329 |
| P02768 | 0 | 1      | 744.3192 | 2230.943 | 1.48 | 0.0011  | 4.571673 |
| P02768 | 0 | 0.9592 | 584.8278 | 1168.648 | 2.71 | 0.00158 | 27.78719 |
| P02768 | 0 | 1      | 744.3192 | 2230.943 | 1.48 | 0.0011  | 5.908863 |
| P02768 | 0 | 1      | 558.4915 | 2230.944 | 1.97 | 0.0011  | 2.546326 |
| P02768 | 0 | 1      | 579.3553 | 1157.703 | 1.95 | 0.00113 | 17.39894 |
| P02768 | 0 | 1      | 558.4909 | 2230.942 | 0.98 | 0.00055 | 24.3815  |
| P02768 | 0 | 1      | 596.2662 | 1786.784 | 0.78 | 0.00047 | 5.851484 |
| P02768 | 1 | 1      | 553.642  | 1658.912 | 0.1  | 0.00006 | 10.05854 |
| P02768 | 0 | 1      | 596.2664 | 1786.785 | 1.09 | 0.00065 | 6.068861 |
| P02768 | 0 | 1      | 566.2394 | 1696.704 | 2.23 | 0.00126 | 21.46559 |
| P02768 | 0 | 1      | 596.2669 | 1786.786 | 1.91 | 0.00114 | 6.373458 |
| P02768 | 0 | 1      | 893.8954 | 1786.783 | 0.52 | 0.00046 | 4.145344 |
| P02768 | 1 | 0.9773 | 553.6429 | 1658.914 | 1.76 | 0.00097 | 9.041361 |
| P02768 | 0 | 1      | 569.754  | 1138.501 | 2.37 | 0.00135 | 11.57822 |
| P02768 | 1 | 0.8667 | 544.2874 | 1630.848 | 0.28 | 0.00015 | 14.15329 |
| P02768 | 0 | 0.8788 | 679.8294 | 1358.652 | 1.11 | 0.00075 | 4.70115  |
| P02768 | 0 | 0.8769 | 679.8299 | 1358.653 | 1.83 | 0.00124 | 4.704859 |
| P02768 | 0 | 0.8769 | 679.8292 | 1358.651 | 0.75 | 0.00051 | 4.650176 |
| P02768 | 0 | 1      | 580.2503 | 1738.736 | 2.25 | 0.0013  | 6.976834 |
| P02768 | 0 | 1      | 821.8452 | 1642.683 | 1.53 | 0.00126 | 8.730055 |
| P02768 | 0 | 1      | 580.2504 | 1738.737 | 2.46 | 0.00142 | 12.78538 |
| P02768 | 0 | 1      | 869.8706 | 1738.734 | 0.85 | 0.00074 | 8.303005 |
| P02768 | 0 | 0.8769 | 679.8301 | 1358.653 | 2.19 | 0.00149 | 10.44248 |
| P02768 | 1 | 1      | 477.3047 | 1429.9   | 1.08 | 0.00051 | 9.018848 |
| P02768 | 0 | 1      | 893.8964 | 1786.786 | 1.68 | 0.0015  | 0        |
| P02768 | 0 | 1      | 596.2669 | 1786.786 | 2.01 | 0.0012  | 4.968367 |
| P02768 | 0 | 1      | 589.9696 | 1767.894 | 2.61 | 0.00154 | 6.634508 |
| P02768 | 0 | 1      | 893.8958 | 1786.784 | 0.92 | 0.00083 | 7.419555 |
| P02768 | 0 | 1      | 941.4791 | 2822.423 | 3.45 | 0.00325 | 14.59891 |
| P02768 | 1 | 0.1111 | 495.5316 | 1979.104 | 0.73 | 0.00036 | 12.45738 |
| P02768 | 1 | 1      | 483.7402 | 1931.939 | 0.42 | 0.0002  | 8.158053 |
| P02768 | 0 | 1      | 936.1461 | 2806.424 | 2.01 | 0.00188 | 4.97189  |



|        |   |        |          |          |       |          |          |
|--------|---|--------|----------|----------|-------|----------|----------|
| P02768 | 0 | 1      | 702.3608 | 2806.421 | 1.17  | 0.00082  | 5.141513 |
| P02768 | 1 | 0.9322 | 644.6512 | 1931.939 | 0.49  | 0.00032  | 8.407876 |
| P02768 | 1 | 1      | 644.6494 | 1931.934 | -2.35 | -0.00152 | 71.44086 |
| P02768 | 1 | 1      | 644.6503 | 1931.936 | -0.84 | -0.00054 | 63.50877 |
| P02768 | 1 | 1      | 644.6505 | 1931.937 | -0.55 | -0.00036 | 0        |
| P02768 | 1 | 1      | 966.4739 | 1931.94  | 1.25  | 0.00121  | 4.989229 |
| P02768 | 1 | 1      | 483.74   | 1931.938 | 0.04  | 0.00002  | 9.644781 |
| P02768 | 0 | 1      | 485.9534 | 1455.846 | 1.12  | 0.00055  | 10.22746 |
| P02768 | 1 | 1      | 644.6506 | 1931.937 | -0.46 | -0.0003  | 8.38799  |
| P02768 | 0 | 1      | 574.919  | 1722.742 | 2.86  | 0.00164  | 9.447586 |
| P02768 | 0 | 1      | 574.9182 | 1722.74  | 1.37  | 0.00079  | 6.84208  |
| P02768 | 0 | 1      | 861.8734 | 1722.739 | 1.1   | 0.00094  | 5.339647 |
| P02768 | 0 | 1      | 574.9171 | 1722.737 | -0.43 | -0.00025 | 6.714633 |
| P02768 | 0 | 1      | 861.8728 | 1722.738 | 0.46  | 0.0004   | 5.362154 |
| P02768 | 0 | 1      | 574.9176 | 1722.738 | 0.42  | 0.00024  | 6.192368 |
| P02768 | 0 | 1      | 861.8727 | 1722.738 | 0.32  | 0.00027  | 4.111784 |
| P02768 | 1 | 1      | 644.6499 | 1931.935 | -1.5  | -0.00097 | 16.30419 |
| P02768 | 1 | 1      | 644.651  | 1931.938 | 0.21  | 0.00013  | 20.82194 |
| P02768 | 1 | 1      | 644.6494 | 1931.934 | -2.26 | -0.00145 | 19.64737 |
| P02768 | 0 | 1      | 789.8226 | 1578.638 | 1.59  | 0.00126  | 30.54846 |
| P02768 | 1 | 1      | 644.6484 | 1931.931 | -3.87 | -0.00249 | 21.65026 |
| P02768 | 1 | 1      | 483.7401 | 1931.938 | 0.17  | 0.00008  | 41.05858 |
| P02768 | 0 | 1      | 574.918  | 1722.739 | 1.05  | 0.0006   | 35.43832 |
| P02768 | 0 | 1      | 435.2369 | 1737.926 | 1.01  | 0.00044  | 8.666703 |
| P02768 | 1 | 1      | 489.954  | 1467.847 | 2.89  | 0.00141  | 14.78901 |
| P02768 | 1 | 0.9355 | 644.6502 | 1931.936 | -1.03 | -0.00066 | 30.63243 |
| P02768 | 0 | 0.8919 | 719.4152 | 1437.823 | 2.72  | 0.00195  | 39.27457 |
| P02768 | 0 | 0.7719 | 539.3418 | 1077.676 | 0.51  | 0.00027  | 23.71292 |
| P02768 | 0 | 0.7436 | 453.5551 | 1358.651 | 0.43  | 0.00019  | 0        |
| P02768 | 0 | 0.7179 | 549.6159 | 1646.833 | -0.39 | -0.00021 | 0        |
| P02768 | 0 | 0.7586 | 539.3428 | 1077.678 | 2.32  | 0.00125  | 7.428948 |
| P02768 | 0 | 0.9661 | 512.7762 | 1024.545 | 1.91  | 0.00098  | 20.24165 |
| P02768 | 0 | 1      | 455.2398 | 1363.705 | 1.32  | 0.0006   | 9.82896  |
| P02768 | 1 | 1      | 448.6027 | 1343.793 | 0.67  | 0.0003   | 17.70633 |
| P02768 | 0 | 1      | 743.8731 | 1486.739 | 1.42  | 0.00106  | 23.9387  |
| P02768 | 0 | 0.8036 | 539.3414 | 1077.675 | -0.29 | -0.00015 | 10.49364 |
| P02768 | 0 | 1      | 566.2388 | 1696.702 | 1.26  | 0.00071  | 73.08008 |
| P02768 | 0 | 1      | 435.9193 | 1305.743 | 2.14  | 0.00093  | 13.98603 |
| P02768 | 0 | 1      | 596.2671 | 1786.787 | 2.32  | 0.00138  | 7.788616 |
| P02768 | 0 | 0.8571 | 636.8496 | 1272.692 | -0.57 | -0.00036 | 4.572615 |
| P02768 | 0 | 0.7838 | 453.5553 | 1358.651 | 0.97  | 0.00044  | 9.872382 |
| P02768 | 1 | 0.9412 | 681.8777 | 1362.748 | 1.02  | 0.00069  | 40.20883 |
| P02768 | 0 | 0.9    | 512.7764 | 1024.546 | 2.38  | 0.00122  | 23.0758  |
| P02768 | 0 | 1      | 553.9294 | 1659.774 | 1.74  | 0.00096  | 26.08163 |
| P02768 | 0 | 0.625  | 549.6165 | 1646.835 | 0.72  | 0.0004   | 62.64732 |
| P02768 | 0 | 0.8889 | 1093.521 | 3278.547 | 1.16  | 0.00127  | 4.071406 |
| P02768 | 1 | 0.8542 | 806.4769 | 1611.947 | 0.91  | 0.00073  | 7.701343 |
| P02768 | 0 | 0.8125 | 584.8261 | 1168.645 | -0.32 | -0.00019 | 5.558077 |
| P02768 | 0 | 0.7857 | 539.3424 | 1077.678 | 1.64  | 0.00088  | 22.84634 |
| P02768 | 0 | 1      | 744.3183 | 2230.94  | 0.33  | 0.00025  | 0        |
| P02768 | 0 | 1      | 553.9291 | 1659.773 | 1.19  | 0.00066  | 47.67428 |
| P02768 | 1 | 0.8333 | 547.5559 | 2187.202 | 1.02  | 0.00056  | 2.601221 |

|        |   |        |          |          |       |          |          |
|--------|---|--------|----------|----------|-------|----------|----------|
| P02768 | 0 | 1      | 821.8458 | 1642.684 | 2.35  | 0.00193  | 0        |
| P02768 | 1 | 0.4286 | 388.5662 | 1163.684 | 2.97  | 0.00115  | 25.86027 |
| P02768 | 0 | 1      | 455.2399 | 1363.705 | 1.52  | 0.00069  | 15.55305 |
| P02768 | 0 | 1      | 435.9189 | 1305.742 | 1.3   | 0.00056  | 5.106997 |
| P02768 | 0 | 0.7907 | 430.2745 | 1288.809 | 0.87  | 0.00037  | 7.16763  |
| P02768 | 0 | 0.9815 | 610.3048 | 1219.602 | 1     | 0.00061  | 2.182498 |
| P02768 | 0 | 0.7857 | 539.3412 | 1077.675 | -0.63 | -0.00034 | 28.31632 |
| P02768 | 1 | 0.9318 | 596.6186 | 1787.841 | 2.93  | 0.00174  | 3.456623 |
| P02768 | 1 | 0.125  | 596.6182 | 1787.84  | 2.31  | 0.00138  | 6.550745 |
| P02768 | 1 | 0.5517 | 521.0073 | 1561.007 | 1.63  | 0.00085  | 15.29519 |
| P02768 | 0 | 1      | 580.2504 | 1738.737 | 2.35  | 0.00136  | 20.15846 |
| P02768 | 0 | 1      | 455.2396 | 1363.704 | 0.78  | 0.00036  | 49.98822 |
| P02768 | 0 | 0.7941 | 552.8367 | 1104.666 | 1.44  | 0.0008   | 18.99468 |
| P02768 | 0 | 0.8696 | 850.0805 | 2548.227 | 0.06  | 0.00005  | 0        |
| P02768 | 1 | 0.9318 | 596.6186 | 1787.841 | 2.93  | 0.00174  | 3.456623 |
| P02768 | 0 | 0.6667 | 430.2747 | 1288.81  | 1.29  | 0.00055  | 0        |
| P02768 | 0 | 1      | 542.7798 | 1084.552 | 1.79  | 0.00097  | 2.749371 |
| P02768 | 0 | 0.7857 | 539.3422 | 1077.677 | 1.19  | 0.00064  | 4.301626 |
| P02768 | 0 | 1      | 542.7795 | 1084.552 | 1.34  | 0.00073  | 3.627981 |
| P02768 | 1 | 1      | 644.6497 | 1931.934 | -1.88 | -0.00121 | 71.1075  |
| P02768 | 0 | 0.8571 | 637.8138 | 2548.234 | 2.65  | 0.00169  | 59.17595 |
| P02768 | 0 | 0.6389 | 544.2857 | 1630.843 | 2.25  | 0.00122  | 9.035712 |
| P02768 | 1 | 0.85   | 644.6536 | 1931.946 | 4.19  | 0.0027   | 15.9724  |
| P02768 | 0 | 1      | 577.9554 | 1731.852 | 3.24  | 0.00187  | 42.2208  |
| P02768 | 0 | 0.8409 | 539.3417 | 1077.676 | 0.39  | 0.00021  | 28.96143 |
| P02768 | 0 | 0.5957 | 620.3273 | 1239.647 | 1.18  | 0.00073  | 14.23868 |
| P02768 | 0 | 0.6977 | 539.3143 | 1077.621 | 0.66  | 0.00035  | 0        |
| P02768 | 0 | 1      | 435.9189 | 1305.742 | 1.3   | 0.00056  | 25.39859 |
| P02768 | 0 | 0.8837 | 539.3144 | 1077.622 | 0.77  | 0.00042  | 100      |
| P02768 | 1 | 1      | 596.6188 | 1787.842 | 3.23  | 0.00193  | 9.187243 |
| P02768 | 1 | 1      | 537.9858 | 1611.943 | -1.34 | -0.00072 | 0        |
| P02768 | 0 | 0.7407 | 549.6166 | 1646.835 | 0.83  | 0.00046  | 0        |
| P02768 | 0 | 1      | 428.2077 | 1282.608 | 6.59  | 0.00282  | 31.12209 |
| P02768 | 0 | 1      | 553.9331 | 1659.785 | 8.36  | 0.00463  | 45.86778 |
| P02768 | 0 | 0.85   | 980.1629 | 2938.474 | 2.06  | 0.00202  | 3.013132 |
| P02768 | 0 | 1      | 522.4659 | 2086.842 | 2.11  | 0.0011   | 10.09212 |
| P02768 | 0 | 0.82   | 539.3433 | 1077.679 | 3.34  | 0.0018   | 31.63962 |
| P02768 | 0 | 0.8889 | 544.2843 | 1630.838 | -0.33 | -0.00018 | 20.10644 |
| P02768 | 1 | 0.9375 | 483.7404 | 1931.94  | 0.92  | 0.00045  | 3.093818 |
| P02768 | 1 | 1      | 715.4534 | 1429.9   | 1.07  | 0.00076  | 28.4628  |
| P02768 | 0 | 1      | 893.895  | 1786.783 | 0.11  | 0.00009  | 0        |
| P02768 | 0 | 1      | 435.9181 | 1305.74  | -0.67 | -0.00029 | 4.225839 |
| P02768 | 1 | 1      | 537.9888 | 1611.952 | 4.12  | 0.00221  | 51.33878 |
| P02768 | 0 | 0.8409 | 539.3422 | 1077.677 | 1.19  | 0.00064  | 28.95014 |
| P02768 | 0 | 1      | 542.7794 | 1084.552 | 1.12  | 0.00061  | 3.349341 |
| P02768 | 2 |        | 551.7908 | 2204.141 | 2.8   | 0.00154  | 27.97959 |
| P02768 | 1 | 1      | 596.6188 | 1787.842 | 3.23  | 0.00193  | 9.187243 |
| P02768 | 0 | 0.8824 | 620.1074 | 2477.408 | 2.44  | 0.00151  | 15.47137 |
| P02768 | 1 | 0.6522 | 403.7427 | 1611.949 | 2.48  | 0.001    | 46.24142 |
| P02768 | 0 | 1      | 455.2394 | 1363.704 | 0.38  | 0.00017  | 3.60887  |
| P02768 | 0 | 1      | 564.8002 | 1128.593 | 2.29  | 0.00129  | 24.55001 |
| P02768 | 0 | 0.1579 | 778.4388 | 2333.302 | 1.06  | 0.00083  | 0        |

|        |   |        |          |          |       |          |          |
|--------|---|--------|----------|----------|-------|----------|----------|
| P02768 | 0 | 1      | 522.4655 | 2086.84  | 1.29  | 0.00067  | 0        |
| P02768 | 0 | 0.8636 | 649.325  | 1945.96  | 1.81  | 0.00118  | 3.228806 |
| P02768 | 0 | 0.8421 | 539.3146 | 1077.622 | 1.11  | 0.0006   | 100      |
| P02768 | 0 | 0.7143 | 733.7184 | 2199.141 | 2.26  | 0.00166  | 32.43684 |
| P02768 | 0 | 0.9259 | 564.7999 | 1128.592 | 1.75  | 0.00099  | 4.327916 |
| P02768 | 0 | 0.5909 | 549.6186 | 1646.841 | 4.5   | 0.00247  | 80.52822 |
| P02768 | 0 | 1      | 580.2507 | 1738.737 | 2.88  | 0.00167  | 23.58636 |
| P02768 | 0 | 1      | 580.2496 | 1738.734 | 1.09  | 0.00063  | 16.43735 |
| P02768 | 1 | 0.9333 | 454.9209 | 1362.748 | 0.99  | 0.00045  | 42.73316 |
| P02768 | 0 | 1      | 580.2502 | 1738.736 | 2.14  | 0.00124  | 19.26483 |
| P02768 | 0 | 0.8039 | 539.3419 | 1077.677 | 0.73  | 0.00039  | 23.47288 |
| P02768 | 0 | 1      | 789.8221 | 1578.637 | 0.97  | 0.00077  | 44.37389 |
| P02768 | 0 | 1      | 580.2506 | 1738.737 | 2.77  | 0.00161  | 16.0844  |
| P02768 | 0 | 0.84   | 549.6177 | 1646.839 | 2.95  | 0.00162  | 0        |
| P02768 | 0 | 1      | 596.267  | 1786.786 | 2.11  | 0.00126  | 59.69704 |
| P02768 | 0 | 1      | 428.2061 | 1282.604 | 2.8   | 0.0012   | 52.10535 |
| P02768 | 0 | 1      | 564.8007 | 1128.594 | 3.16  | 0.00178  | 0        |
| P02768 | 1 | 0.9565 | 483.7406 | 1931.941 | 1.3   | 0.00063  | 28.05309 |
| P02768 | 0 | 1      | 542.7778 | 1084.548 | -1.81 | -0.00098 | 0        |
| P02768 | 1 | 1      | 483.7402 | 1931.939 | 0.42  | 0.0002   | 43.02632 |
| P02768 | 1 | 1      | 483.7398 | 1931.937 | -0.34 | -0.00016 | 50.73358 |
| P02768 | 1 | 1      | 483.7399 | 1931.938 | -0.09 | -0.00004 | 39.78196 |
| P02768 | 1 | 0.92   | 483.7404 | 1931.94  | 0.86  | 0.00042  | 19.38438 |
| P02768 | 0 | 1      | 529.9205 | 1587.747 | 1.74  | 0.00092  | 10.32073 |
| P02768 | 1 | 0.875  | 436.5997 | 1307.784 | 1.39  | 0.00061  | 24.9861  |
| P02768 | 0 | 1      | 435.9193 | 1305.743 | 2.14  | 0.00093  | 0        |
| P02768 | 0 | 0.7674 | 413.8872 | 1239.647 | 0.85  | 0.00035  | 7.137344 |
| P02768 | 2 | 0.9744 | 515.764  | 2060.034 | 0.52  | 0.00027  | 5.000806 |
| P02768 | 0 | 0.6842 | 647.364  | 1293.721 | 2.74  | 0.00178  | 7.428512 |
| P02768 | 0 | 0.5652 | 480.7853 | 960.5632 | 0.72  | 0.00035  | 29.4296  |
| P02768 | 0 | 0.8696 | 850.0811 | 2548.229 | 0.71  | 0.0006   | 12.98415 |
| P02768 | 0 | 0.6061 | 620.3275 | 1239.648 | 1.37  | 0.00085  | 49.46403 |
| P02768 | 0 | 0.875  | 637.8133 | 2548.231 | 1.78  | 0.00114  | 14.4873  |
| P02768 | 1 | 0.75   | 454.9201 | 1362.746 | -0.76 | -0.00034 | 7.269978 |
| P02768 | 2 | 0.1579 | 507.0409 | 2025.142 | 2.28  | 0.00116  | 9.550075 |
| P02768 | 0 | 0.8696 | 850.0813 | 2548.229 | 1     | 0.00085  | 9.173298 |
| P02768 | 0 | 1      | 507.3041 | 1013.601 | 1.88  | 0.00095  | 7.372126 |
| P02768 | 0 | 1      | 542.779  | 1084.551 | 0.33  | 0.00018  | 2.535678 |
| P02768 | 1 | 0.68   | 644.6502 | 1931.936 | -1.03 | -0.00066 | 37.70908 |
| P02768 | 0 | 0.9444 | 407.2057 | 1219.603 | 1.24  | 0.0005   | 4.587513 |
| P02768 | 0 | 0.6977 | 548.2762 | 1095.545 | 1.12  | 0.00061  | 6.410838 |
| P02768 | 0 | 0.8864 | 564.7999 | 1128.593 | 1.86  | 0.00105  | 6.011661 |
| P02768 | 0 | 0.8571 | 550.5404 | 2199.14  | 1.81  | 0.001    | 13.19618 |
| P02768 | 1 | 0.64   | 391.0072 | 1561.007 | 1.43  | 0.00056  | 27.2179  |
| P02768 | 0 | 1      | 455.2401 | 1363.706 | 1.86  | 0.00084  | 0        |
| P02768 | 0 | 1      | 744.3193 | 2230.943 | 1.65  | 0.00122  | 29.75278 |
| P02768 | 0 | 0.3429 | 531.9458 | 1593.823 | 0.62  | 0.00033  | 7.30972  |
| P02768 | 0 | 0.5238 | 980.1651 | 2938.481 | 4.3   | 0.00421  | 5.669075 |
| P02768 | 0 | 0.7037 | 1239.204 | 2477.401 | -0.25 | -0.00032 | 0        |
| P02768 | 0 | 1      | 679.8304 | 1358.654 | 2.64  | 0.00179  | 0        |
| P02768 | 0 | 0.8148 | 553.9294 | 1659.774 | 1.63  | 0.0009   | 22.5912  |
| P02768 | 0 | 0.7826 | 620.1069 | 2477.406 | 1.75  | 0.00109  | 1.669948 |

|        |   |        |          |          |       |          |          |
|--------|---|--------|----------|----------|-------|----------|----------|
| P02768 | 2 | 1      | 551.7914 | 2204.144 | 4.02  | 0.00222  | 4.86042  |
| P02768 | 0 | 0.5714 | 588.5004 | 2938.473 | 1.67  | 0.00098  | 0        |
| P02768 | 0 | 0.8333 | 850.0808 | 2548.228 | 0.42  | 0.00036  | 0        |
| P02768 | 0 | 0.8148 | 467.2911 | 933.575  | 1.38  | 0.00065  | 23.97549 |
| P02768 | 0 | 1      | 435.9202 | 1305.746 | 4.17  | 0.00182  | 19.71195 |
| P02768 | 0 | 1      | 607.7795 | 1214.552 | 3.16  | 0.00192  | 0        |
| P02768 | 0 | 0.9    | 390.2202 | 1168.646 | 0.76  | 0.0003   | 9.379023 |
| P02768 | 0 | 1      | 815.924  | 1630.841 | 1.14  | 0.00093  | 40.3561  |
| P02768 | 0 | 1      | 744.3176 | 2230.938 | -0.57 | -0.00042 | 0        |
| P02768 | 1 | 1      | 483.7397 | 1931.937 | -0.65 | -0.00032 | 50.08033 |
| P02768 | 0 | 1      | 558.4928 | 2230.949 | 4.38  | 0.00244  | 14.19997 |
| P02768 | 0 | 1      | 580.2492 | 1738.733 | 0.25  | 0.00014  | 69.09566 |
| P02768 | 0 | 0.2353 | 778.439  | 2333.302 | 1.22  | 0.00095  | 8.940798 |
| P02768 | 0 | 0.7949 | 581.3242 | 1161.641 | 2.35  | 0.00136  | 8.965211 |
| P02768 | 0 | 0.25   | 637.8142 | 2548.235 | 3.12  | 0.00199  | 51.99315 |
| P02768 | 0 | 0.5926 | 453.5547 | 1358.65  | -0.38 | -0.00017 | 0        |
| P02768 | 2 | 0.9744 | 515.764  | 2060.034 | 0.52  | 0.00027  | 5.000806 |
| P02768 | 0 | 0.7073 | 647.3658 | 1293.724 | 5.57  | 0.00361  | 0        |
| P02768 | 0 | 0.6842 | 572.8579 | 1144.709 | 2.41  | 0.00138  | 14.63735 |
| P02768 | 0 | 0.5778 | 480.7862 | 960.5652 | 2.75  | 0.00132  | 11.97689 |
| P02768 | 0 | 1      | 696.2856 | 2086.842 | 2.32  | 0.00162  | 0        |
| P02768 | 0 | 0.9697 | 743.8736 | 1486.74  | 2.08  | 0.00154  | 6.001875 |
| P02768 | 2 | 1      | 441.6334 | 2204.138 | 1.33  | 0.00059  | 10.21609 |
| P02768 | 0 | 0.9    | 653.3763 | 1305.745 | 3.67  | 0.00239  | 18.04017 |
| P02768 | 0 | 1      | 542.7791 | 1084.551 | 0.44  | 0.00024  | 2.516496 |
| P02768 | 0 | 0.8235 | 826.475  | 2477.411 | 3.63  | 0.003    | 37.47957 |
| P02768 | 0 | 1      | 564.8004 | 1128.594 | 2.72  | 0.00154  | 31.17029 |
| P02768 | 0 | 1      | 596.2671 | 1786.787 | 2.32  | 0.00138  | 68.96686 |
| P02768 | 0 | 0.2727 | 387.8844 | 1161.639 | 0.18  | 0.00007  | 71.88502 |
| P02768 | 1 | 0.9091 | 643.3872 | 1928.147 | 2.6   | 0.00167  | 4.356931 |
| P02768 | 0 | 0.9048 | 424.9024 | 1272.693 | 0.16  | 0.00007  | 3.625645 |
| P02768 | 1 | 0.2083 | 521.0057 | 1561.002 | -1.54 | -0.0008  | 22.31177 |
| P02768 | 0 | 0.7143 | 539.3145 | 1077.622 | 0.88  | 0.00048  | 5.960021 |
| P02768 | 0 | 0.8    | 649.3222 | 1945.952 | -2.42 | -0.00157 | 46.14616 |
| P02768 | 0 | 1      | 584.8269 | 1168.647 | 1.14  | 0.00067  | 10.77093 |
| P02768 | 0 | 0.7059 | 699.3487 | 2794.373 | 2.47  | 0.00172  | 17.04577 |
| P02768 | 1 | 1      | 644.6522 | 1931.942 | 2.1   | 0.00135  | 7.51436  |
| P02768 | 0 | 1      | 861.8739 | 1722.741 | 1.73  | 0.00149  | 0        |
| P02768 | 0 | 0.7949 | 552.8356 | 1104.664 | -0.54 | -0.0003  | 3.278935 |
| P02768 | 0 | 0.6923 | 480.7854 | 960.5635 | 1.04  | 0.0005   | 3.813688 |
| P02768 | 0 | 1      | 552.6544 | 1655.949 | 2.22  | 0.00122  | 36.04953 |
| P02768 | 0 | 0.96   | 413.8877 | 1239.648 | 2.03  | 0.00084  | 0        |
| P02768 | 2 | 1      | 441.6335 | 2204.138 | 1.54  | 0.00068  | 13.85383 |
| P02768 | 0 | 1      | 580.2496 | 1738.734 | 0.98  | 0.00057  | 9.17481  |
| P02768 | 0 | 1      | 580.2509 | 1738.738 | 3.2   | 0.00185  | 31.53621 |
| P02768 | 1 | 0.9524 | 482.7922 | 1928.147 | 2.66  | 0.00128  | 0        |
| P02768 | 0 | 0.4    | 850.08   | 2548.225 | -0.58 | -0.0005  | 0        |
| P02768 | 0 | 1      | 455.2395 | 1363.704 | 0.72  | 0.00033  | 28.61316 |
| P02768 | 0 | 0.8    | 637.8133 | 2548.231 | 1.78  | 0.00114  | 21.33987 |
| P02768 | 2 | 1      | 580.8454 | 2320.36  | 5.14  | 0.00298  | 21.81264 |
| P02768 | 2 | 1      | 580.8454 | 2320.36  | 5.14  | 0.00298  | 21.81264 |
| P02768 | 2 | 1      | 580.8454 | 2320.36  | 5.14  | 0.00298  | 21.81264 |

|        |   |        |          |          |       |          |          |
|--------|---|--------|----------|----------|-------|----------|----------|
| P02768 | 0 | 1      | 485.9538 | 1455.847 | 2     | 0.00097  | 3.911112 |
| P02768 | 0 | 1      | 1239.206 | 2477.404 | 1.12  | 0.00139  | 7.344357 |
| P02768 | 0 | 0.8571 | 637.8118 | 2548.225 | -0.52 | -0.00033 |          |
| P02768 | 0 | 1      | 564.7995 | 1128.592 | 1.1   | 0.00062  | 51.88667 |
| P02768 | 0 | 0.6667 | 644.9088 | 1288.81  | 1.94  | 0.00125  | 36.3767  |
| P02768 | 0 | 0.7778 | 815.9248 | 1630.842 | 2.11  | 0.00172  | 31.97009 |
| P02768 | 0 | 0.8636 | 539.3138 | 1077.62  | -0.25 | -0.00013 | 2.679921 |
| P02768 | 0 | 1      | 539.3142 | 1077.621 | 0.32  | 0.00017  | 37.06232 |
| P02768 | 0 | 1      | 580.2504 | 1738.737 | 2.35  | 0.00136  | 36.53078 |
| P02768 | 1 | 0.8235 | 483.7402 | 1931.939 | 0.48  | 0.00023  | 13.91497 |
| P02768 | 0 | 0.92   | 387.8849 | 1161.64  | 1.36  | 0.00053  | 18.04419 |
| P02768 | 0 | 1      | 387.8849 | 1161.64  | 1.52  | 0.00059  | 4.82237  |
| P02768 | 0 | 0.5    | 550.54   | 2199.138 | 1.15  | 0.00063  | 6.216532 |
| P02768 | 0 |        | 588.5004 | 2938.473 | 1.57  | 0.00092  | 3.169176 |
| P02768 | 0 | 0.6667 | 637.8136 | 2548.233 | 2.26  | 0.00144  | 67.94438 |
| P02768 | 0 | 1      | 558.4919 | 2230.946 | 2.74  | 0.00153  | 11.08828 |
| P02768 | 0 | 1      | 428.2068 | 1282.606 | 4.44  | 0.0019   | 14.55579 |
| P02768 | 0 | 1      | 574.9189 | 1722.742 | 2.65  | 0.00152  | 21.98879 |
| P02768 | 0 | 1      | 580.2506 | 1738.737 | 2.77  | 0.00161  | 19.36002 |
| P02768 | 0 | 0.9259 | 542.7785 | 1084.55  | -0.57 | -0.00031 | 25.97374 |
| P02768 | 0 | 0.25   | 544.2852 | 1630.841 | 1.24  | 0.00068  | 5.780238 |
| P02768 | 0 | 0.5758 | 480.7852 | 960.5631 | 0.59  | 0.00029  | 54.5745  |
| P02768 | 0 | 1      | 505.895  | 1515.67  | 0.99  | 0.0005   | 46.53205 |
| P01031 | 0 | 0.7288 | 731.9316 | 1462.856 | 3.49  | 0.00255  | 13.47209 |
| P01031 | 0 | 1      | 562.2818 | 1684.831 | 2.45  | 0.00137  | 7.348059 |
| P01031 | 0 | 0.8947 | 842.9185 | 1684.83  | 1.8   | 0.00152  | 3.331119 |
| P01031 | 0 | 1      | 562.2819 | 1684.831 | 2.56  | 0.00144  | 15.15485 |
| P01031 | 0 | 0.85   | 513.9574 | 1539.858 | 1.36  | 0.0007   | 8.26269  |
| P01031 | 0 | 0.7358 | 770.4342 | 1539.861 | 3.63  | 0.00279  | 0        |
| P01031 | 0 | 1      | 589.9637 | 1767.877 | 6.62  | 0.0039   | 33.93773 |
| P01031 | 0 | 0.9787 | 614.3645 | 1227.722 | 3.24  | 0.00199  | 9.977339 |
| P01031 | 0 | 0.9792 | 409.9115 | 1227.72  | 1.79  | 0.00073  | 3.042572 |
| P01031 | 0 | 0.8085 | 465.9236 | 1395.756 | 2.01  | 0.00094  | 4.820879 |
| P01031 | 0 | 0.8    | 551.6604 | 1652.967 | 3.18  | 0.00175  | 41.33758 |
| P01031 | 0 | 0.9048 | 413.9969 | 1652.966 | 2.55  | 0.00105  | 4.007162 |
| P01031 | 0 | 0.2609 | 514.3294 | 1540.974 | 4.67  | 0.0024   | 36.49748 |
| P01031 | 0 | 0.7333 | 385.9972 | 1540.967 | 0.3   | 0.00012  | 4.471771 |
| P01031 | 0 | 0.3793 | 514.3288 | 1540.972 | 3.48  | 0.00179  | 8.48204  |
| P01031 | 0 | 1      | 1219.63  | 3656.874 | -0.03 | -0.00004 | 0        |
| P01031 | 0 | 1      | 665.8359 | 1330.664 | 2.2   | 0.00146  | 0        |
| P01031 | 0 | 0.8889 | 675.8896 | 1350.772 | 1.88  | 0.00127  | 6.856209 |
| P01031 | 0 | 0.5333 | 612.8778 | 1224.748 | 3.29  | 0.00202  | 6.191976 |
| P01031 | 0 | 0.9884 | 709.7255 | 2127.162 | 2     | 0.00142  | 4.760758 |
| P01031 | 0 | 1      | 1064.084 | 2127.162 | 1.92  | 0.00204  | 0        |
| P01031 | 0 | 0.9664 | 1064.083 | 2127.159 | 0.89  | 0.00094  | 14.13525 |
| P01031 | 0 | 1      | 1183.156 | 2365.304 | 1.46  | 0.00172  | 0        |
| P01031 | 0 | 0.9737 | 789.107  | 2365.306 | 2.48  | 0.00196  | 5.878727 |
| P01031 | 0 | 0.6818 | 697.8812 | 1394.755 | 2.43  | 0.00169  | 5.350134 |
| P01031 | 0 | 0.8906 | 483.2304 | 1447.676 | -3.25 | -0.00157 | 25.57495 |
| P01031 | 0 | 0.9538 | 684.3508 | 1367.694 | 1.42  | 0.00097  | 7.562445 |
| P01031 | 0 | 1      | 1095.075 | 2189.143 | 5.75  | 0.0063   |          |
| P01031 | 0 | 1      | 730.382  | 2189.132 | 0.68  | 0.00049  | 6.877311 |

|        |   |        |          |          |       |          |          |
|--------|---|--------|----------|----------|-------|----------|----------|
| P01031 | 0 | 1      | 842.8656 | 2526.582 | 1.39  | 0.00117  | 12.85988 |
| P01031 | 0 | 1      | 632.4011 | 2526.582 | 1.46  | 0.00092  | 11.64872 |
| P01031 | 1 | 1      | 856.3585 | 2567.061 | -0.44 | -0.00038 | 0        |
| P01031 | 1 | 0.7317 | 445.2861 | 1333.844 | 1.62  | 0.00072  | 19.04945 |
| P01031 | 0 | 1      | 805.4287 | 2414.272 | 4.03  | 0.00325  | 2.2105   |
| P01031 | 0 | 1      | 862.4313 | 2585.279 | 0.25  | 0.00022  | 19.74035 |
| P01031 | 0 | 0.9104 | 531.2668 | 1591.786 | 1.6   | 0.00085  | 5.332033 |
| P01031 | 0 | 1      | 599.0184 | 1795.041 | 4.57  | 0.00273  | 28.34602 |
| P01031 | 0 | 0.9762 | 549.9952 | 1647.971 | 2.29  | 0.00126  | 15.34928 |
| P01031 | 0 | 1      | 613.643  | 1838.914 | 3.28  | 0.00201  | 8.181591 |
| P01031 | 0 | 1      | 753.7267 | 2259.166 | 2.15  | 0.00162  | 3.001609 |
| P01031 | 0 | 1      | 1130.087 | 2259.167 | 2.61  | 0.00295  | 0        |
| P01031 | 0 | 1      | 936.5189 | 2807.542 | -0.39 | -0.00037 | 17.29827 |
| P01031 | 0 | 1      | 728.3403 | 1455.673 | 1.62  | 0.00118  | 0        |
| P01031 | 0 | 1      | 1075.886 | 2150.765 | 1.11  | 0.00119  | 0        |
| P01031 | 0 | 1      | 968.2512 | 2902.739 | 5.91  | 0.00572  | 6.715281 |
| P01031 | 0 | 0.9048 | 635.7316 | 1905.18  | 1.47  | 0.00093  | 62.14106 |
| P01031 | 0 | 1      | 726.4379 | 2902.73  | 2.74  | 0.00198  | 4.52687  |
| P01031 | 1 | 0.7059 | 445.2858 | 1333.843 | 1.07  | 0.00048  | 32.00188 |
| P01031 | 0 | 1      | 635.7313 | 1905.179 | 0.89  | 0.00057  | 46.2723  |
| P01031 | 0 | 1      | 635.7323 | 1905.182 | 2.53  | 0.00161  | 52.74075 |
| P01031 | 0 | 1      | 765.6279 | 2294.869 | 1.72  | 0.00131  | 26.09533 |
| P01031 | 0 | 0.541  | 599.8602 | 1198.713 | 4.72  | 0.00283  | 9.887559 |
| P01031 | 0 | 1      | 800.3909 | 1599.775 | 0.93  | 0.00075  | 3.621832 |
| P01031 | 0 | 1      | 533.9301 | 1599.776 | 1.57  | 0.00084  | 6.26926  |
| P01031 | 0 | 0.6596 | 488.2899 | 1462.855 | 2.96  | 0.00144  | 25.10291 |
| P01031 | 0 | 0.6429 | 731.9318 | 1462.856 | 3.74  | 0.00274  | 21.23481 |
| P01031 | 0 | 0.9231 | 492.2625 | 1474.773 | 1.99  | 0.00098  | 14.74348 |
| P01031 | 0 | 1      | 416.8824 | 1248.633 | 2.04  | 0.00085  | 21.4586  |
| P01031 | 0 | 0.7037 | 570.8423 | 1140.677 | 7.35  | 0.00419  | 0        |
| P01031 | 0 | 1      | 665.8359 | 1330.664 | 2.2   | 0.00146  | 0        |
| P01031 | 0 | 1      | 624.8196 | 1248.632 | 1.47  | 0.00091  | 7.261602 |
| P01031 | 0 | 0.8387 | 466.2945 | 1396.869 | 3.17  | 0.00148  | 3.811645 |
| P01031 | 0 | 0.9032 | 456.5696 | 1367.694 | 1.43  | 0.00065  | 0        |
| P01031 | 0 | 0.9825 | 579.346  | 1157.685 | 3.35  | 0.00194  | 0        |
| P01031 | 0 | 0.8148 | 474.9348 | 1422.79  | 2.47  | 0.00117  | 49.14931 |
| P01031 | 0 | 0.7708 | 620.8576 | 1240.708 | 4.21  | 0.00261  | 0        |
| P01031 | 0 | 0.4444 | 449.514  | 1795.034 | 0.99  | 0.00044  | 7.724353 |
| P01031 | 0 | 1      | 562.2821 | 1684.832 | 2.99  | 0.00168  | 23.86173 |
| P01031 | 1 | 1      | 488.54   | 1951.138 | 2.21  | 0.00108  | 8.901708 |
| P01031 | 0 | 0.7317 | 474.7598 | 948.5123 | 0.44  | 0.00021  | 0        |
| P01031 | 0 | 1      | 416.882  | 1248.632 | 1.16  | 0.00048  | 41.0483  |
| P01031 | 1 | 0.85   | 541.6608 | 1622.968 | 0.95  | 0.00052  | 30.37296 |
| P01031 | 0 | 1      | 465.9232 | 1395.755 | 1.16  | 0.00054  | 0        |
| P01031 | 0 | 1      | 608.6951 | 1824.071 | -0.77 | -0.00047 | 0        |
| P01031 | 0 | 0.7297 | 503.6252 | 1508.861 | 1.17  | 0.00059  | 2.684187 |
| P01031 | 0 | 0.9231 | 591.7969 | 1182.586 | 1.31  | 0.00077  | 0        |
| P01031 | 0 | 0.96   | 394.8672 | 1182.587 | 1.68  | 0.00066  | 39.39681 |
| P01031 | 0 | 0.4359 | 531.3447 | 1061.682 | 1.13  | 0.0006   | 26.3804  |
| P01031 | 0 | 1      | 385.7194 | 1539.856 | 0.2   | 0.00008  | 12.05418 |
| P01031 | 1 | 0.5185 | 493.6268 | 1478.866 | 1.1   | 0.00054  | 24.74531 |
| P01031 | 1 | 0.5185 | 493.6268 | 1478.866 | 1.1   | 0.00054  | 24.74531 |

|        |   |        |          |          |       |          |          |
|--------|---|--------|----------|----------|-------|----------|----------|
| P01031 | 0 | 1      | 765.6266 | 2294.865 | 0.04  | 0.00003  | 0        |
| P01031 | 0 | 0.7097 | 465.5895 | 1394.754 | 1.63  | 0.00076  | 57.86474 |
| P01031 | 0 | 0.5455 | 514.3279 | 1540.969 | 1.82  | 0.00093  | 12.11005 |
| P01031 | 0 | 0.48   | 459.2937 | 917.5802 | 1.52  | 0.00007  | 7.131306 |
| P01031 | 0 | 0.6829 | 546.8121 | 1092.617 | 2.83  | 0.00155  | 10.14931 |
| P01031 | 0 | 1      | 800.3924 | 1599.778 | 2.77  | 0.00221  | 4.323926 |
| P01031 | 0 | 1      | 728.34   | 1455.673 | 1.12  | 0.00081  | 21.39882 |
| P01031 | 0 | 1      | 754.9342 | 1508.861 | 1.2   | 0.0009   | 40.02469 |
| P01031 | 1 | 1      | 452.5136 | 1807.033 | 0.56  | 0.00025  | 29.44942 |
| P01031 | 0 | 0.7667 | 546.8112 | 1092.615 | 1.15  | 0.00063  | 63.91224 |
| P01031 | 0 | 1      | 591.8906 | 1182.774 | 3.35  | 0.00198  | 27.00819 |
| P01031 | 1 | 0.9143 | 603.0169 | 1807.036 | 2.53  | 0.00152  | 0        |
| P01031 | 0 | 0.6585 | 599.8593 | 1198.711 | 3.29  | 0.00197  | 31.02072 |
| P01031 | 0 | 1      | 570.8397 | 1140.672 | 2.75  | 0.00157  | 15.68983 |
| P01031 | 0 | 0.8182 | 513.9562 | 1539.854 | -0.9  | -0.00046 | 0        |
| P01031 | 0 | 1      | 533.9302 | 1599.776 | 1.8   | 0.00096  | 41.23232 |
| P01031 | 0 | 0.5778 | 503.3321 | 1005.657 | 2.19  | 0.0011   | 10.69921 |
| P01031 | 1 | 0.75   | 406.4982 | 1622.971 | 2.9   | 0.00118  | 5.135925 |
| P01031 | 0 | 0.931  | 503.6252 | 1508.861 | 1.17  | 0.00059  | 33.49602 |
| P01031 | 0 | 0.92   | 531.2669 | 1591.786 | 1.71  | 0.00091  | 21.93405 |
| P01031 | 0 | 0.6154 | 459.2754 | 917.5436 | 1.26  | 0.00058  | 33.00624 |
| P01031 | 0 | 0.875  | 549.9953 | 1647.971 | 2.52  | 0.00138  | 0        |
| P01031 | 0 | 0.3469 | 503.3328 | 1005.658 | 3.59  | 0.0018   | 0        |
| P01031 | 0 | 0.3333 | 531.3451 | 1061.683 | 1.93  | 0.00103  | 47.7251  |
| P01031 | 0 | 0.8462 | 413.9964 | 1652.964 | 1.51  | 0.00062  | 8.021682 |
| P01031 | 1 | 1      | 562.5736 | 2247.273 | 3.25  | 0.00182  | 32.73191 |
| P01031 | 0 | 1      | 728.3401 | 1455.673 | 1.29  | 0.00094  | 13.44284 |
| P01031 | 1 | 0.5    | 474.9325 | 1422.783 | 2.05  | 0.00097  | 50.36946 |
| P01031 | 0 | 0.8485 | 397.8684 | 1191.591 | 1.9   | 0.00075  | 14.85106 |
| P01031 | 0 | 0.7179 | 593.8321 | 1186.657 | 3.07  | 0.00182  | 16.18551 |
| P01031 | 0 | 0.64   | 527.8072 | 1054.607 | 1.67  | 0.00088  | 30.81952 |
| P01031 | 0 | 0.9444 | 579.3447 | 1157.682 | 1.14  | 0.00066  | 0        |
| P01031 | 0 | 0.3636 | 503.3313 | 1005.655 | 0.67  | 0.00034  | 5.938673 |
| P01031 | 0 | 0.3158 | 394.9286 | 1182.771 | 1.1   | 0.00043  | 8.298322 |
| P01031 | 0 | 0.8966 | 551.6621 | 1652.972 | 6.17  | 0.0034   | 40.58726 |
| P01031 | 0 | 0.4651 | 531.3281 | 1061.649 | 4.13  | 0.00219  | 37.31525 |
| P01031 | 0 | 0.8966 | 624.8206 | 1248.634 | 3.03  | 0.00189  | 4.87297  |
| P01031 | 0 | 0.75   | 576.8466 | 1152.686 | -0.62 | -0.00036 | 38.39925 |
| P01031 | 0 | 1      | 728.3397 | 1455.672 | 0.7   | 0.00051  | 20.83271 |
| P01031 | 0 | 0.4545 | 384.902  | 1152.691 | 4.16  | 0.0016   | 5.812415 |
| P01031 | 0 | 0.5152 | 612.8785 | 1224.75  | 4.59  | 0.00281  | 10.54679 |
| P01031 | 0 | 0.6    | 531.2652 | 1591.781 | -1.39 | -0.00074 | 52.74384 |
| P01031 | 0 | 0.8947 | 503.6243 | 1508.858 | -0.65 | -0.00033 | 9.638051 |
| P01031 | 0 | 0.6786 | 546.8121 | 1092.617 | 2.72  | 0.00148  | 28.75905 |
| P01031 | 0 | 0.25   | 414.2397 | 1240.705 | 1.44  | 0.0006   | 0        |
| P01031 | 0 | 1      | 800.3919 | 1599.777 | 2.15  | 0.00172  | 13.5879  |
| P01031 | 0 | 0.8462 | 579.3474 | 1157.688 | 5.78  | 0.00335  | 26.57383 |
| P01023 | 0 | 0.7436 | 600.6645 | 1799.979 | 2.65  | 0.00159  | 65.51884 |
| P01023 | 0 | 0.9024 | 606.3267 | 1816.965 | 2.9   | 0.00176  | 4.060271 |
| P01023 | 0 | 0.8356 | 745.3494 | 2234.034 | 2.88  | 0.00215  | 3.139711 |
| P01023 | 0 | 0.7541 | 745.348  | 2234.03  | 1     | 0.00074  | 2.057614 |
| P01023 | 0 | 1      | 740.017  | 2218.036 | 1.79  | 0.00133  | 3.463063 |

|            |   |        |          |          |       |          |          |
|------------|---|--------|----------|----------|-------|----------|----------|
| P01023     | 0 | 1      | 555.2631 | 2218.031 | -0.77 | -0.00043 | 3.859825 |
| P01023     | 0 | 1      | 740.0166 | 2218.035 | 1.3   | 0.00096  | 2.106216 |
| P01023     | 0 | 1      | 740.0162 | 2218.034 | 0.72  | 0.00053  | 30.03285 |
| P01023     | 0 | 1      | 752.0698 | 2254.195 | 6.82  | 0.00512  | 46.39114 |
| P01023     | 0 | 1      | 702.3416 | 1403.676 | 0.9   | 0.00063  | 15.84251 |
| P01023     | 0 | 0.973  | 600.6645 | 1799.979 | 2.65  | 0.00159  | 25.26567 |
| P01023     | 0 | 0.9429 | 600.6644 | 1799.979 | 2.45  | 0.00147  | 6.787901 |
| P01023; P2 | 0 | 0.7586 | 624.3599 | 1247.712 | 3.91  | 0.00244  | 0        |
| P01023     | 0 | 1      | 423.2319 | 1689.906 | 1.1   | 0.00047  | 4.112817 |
| P01023     | 0 | 0.9107 | 600.665  | 1799.981 | 3.57  | 0.00214  | 9.141077 |
| P01023     | 0 | 0.9091 | 600.6645 | 1799.979 | 2.65  | 0.00159  | 9.499352 |
| P01023     | 0 | 0.9118 | 636.841  | 1272.675 | 1.45  | 0.00092  | 0        |
| P01023     | 0 | 1      | 600.665  | 1799.981 | 3.57  | 0.00214  | 39.26236 |
| P01023     | 0 | 1      | 946.1033 | 2836.295 | 1.79  | 0.00169  | 5.058046 |
| P01023     | 0 | 0.7895 | 600.6642 | 1799.978 | 2.15  | 0.00129  | 0        |
| P01023     | 0 | 0.9318 | 600.6635 | 1799.976 | 1.03  | 0.00062  | 44.61521 |
| P01023     | 0 | 0.8816 | 600.6651 | 1799.981 | 3.67  | 0.0022   | 11.29211 |
| P01023     | 0 | 0.8841 | 600.6655 | 1799.982 | 4.38  | 0.00263  | 5.541611 |
| P01023     | 0 | 0.8971 | 600.6646 | 1799.979 | 2.86  | 0.00171  | 5.962119 |
| P01023     | 0 | 0.8889 | 817.407  | 2450.206 | 1.39  | 0.00114  | 0        |
| P01023     | 0 | 0.9787 | 946.1035 | 2836.296 | 1.98  | 0.00187  | 3.996225 |
| P01023     | 0 | 1      | 946.1028 | 2836.294 | 1.27  | 0.0012   | 5.956341 |
| P01023     | 0 | 1      | 946.1038 | 2836.297 | 2.31  | 0.00218  | 3.119897 |
| P01023     | 0 | 1      | 946.103  | 2836.295 | 1.53  | 0.00145  | 3.524234 |
| P01023     | 0 | 1      | 709.8291 | 2836.295 | 1.55  | 0.0011   | 17.73108 |
| P01023     | 0 | 1      | 946.1043 | 2836.298 | 2.82  | 0.00267  | 2.3199   |
| P01023     | 0 | 0.9574 | 752.0655 | 2254.182 | 1.05  | 0.00079  | 0        |
| P01023     | 0 | 1      | 738.1119 | 2212.321 | 2.18  | 0.00161  | 11.28763 |
| P01023     | 0 | 0.9756 | 553.8356 | 2212.321 | 1.93  | 0.00107  | 7.029124 |
| P01023     | 0 | 0.9259 | 600.6647 | 1799.98  | 3.06  | 0.00184  | 16.56869 |
| P01023     | 0 | 0.8472 | 708.8914 | 1416.775 | 0.35  | 0.00025  | 3.838468 |
| P01023     | 0 | 0.8364 | 472.9308 | 1416.778 | 2.02  | 0.00095  | 7.412191 |
| P01023     | 0 | 0.9825 | 600.665  | 1799.981 | 3.57  | 0.00214  | 8.8484   |
| P01023     | 0 | 0.9104 | 600.6645 | 1799.979 | 2.65  | 0.00159  | 3.630693 |
| P01023     | 0 | 0.9077 | 600.6647 | 1799.98  | 3.06  | 0.00184  | 0        |
| P01023     | 0 | 0.8889 | 600.6647 | 1799.98  | 3.06  | 0.00184  | 9.541169 |
| P01023     | 0 | 0.9231 | 600.6648 | 1799.98  | 3.16  | 0.0019   | 14.34167 |
| P01023     | 0 | 0.9318 | 600.6646 | 1799.979 | 2.76  | 0.00165  | 18.00625 |
| P01023     | 0 | 0.9365 | 600.6649 | 1799.98  | 3.37  | 0.00202  | 8.552613 |
| P01023     | 0 | 1      | 458.2787 | 1372.822 | 1.77  | 0.00081  | 75.03383 |
| P01023     | 0 | 0.9385 | 600.6644 | 1799.979 | 2.55  | 0.00153  | 8.847381 |
| P01023     | 0 | 0.9178 | 600.6646 | 1799.979 | 2.76  | 0.00165  | 9.871824 |
| P01023     | 0 | 0.7925 | 600.6643 | 1799.978 | 2.25  | 0.00135  | 0        |
| P01023     | 0 | 0.8475 | 467.2539 | 1399.747 | 1.53  | 0.00071  | 5.215059 |
| P01023     | 0 | 0.9636 | 700.3765 | 1399.746 | 0.54  | 0.00038  | 3.086525 |
| P01023     | 0 | 1      | 467.253  | 1399.744 | -0.43 | -0.0002  | 12.04316 |
| P01023     | 0 | 1      | 549.0451 | 2193.159 | 2.42  | 0.00133  | 6.682052 |
| P01023; P2 | 0 | 1      | 622.3833 | 1865.135 | 3.18  | 0.00198  | 15.8727  |
| P01023; P2 | 0 | 1      | 467.0389 | 1865.134 | 2.22  | 0.00104  | 53.79703 |
| P01023     | 0 | 1      | 549.0453 | 2193.159 | 2.76  | 0.00151  | 13.8818  |
| P01023     | 0 | 1      | 518.3207 | 1552.947 | 3.35  | 0.00174  | 17.83922 |
| P01023     | 0 | 1      | 518.32   | 1552.945 | 1.94  | 0.001    | 12.895   |



|            |   |        |          |          |      |         |          |
|------------|---|--------|----------|----------|------|---------|----------|
| P01023     | 0 | 1      | 730.0338 | 2188.087 | 0.88 | 0.00065 | 9.869285 |
| P01023     | 0 | 0.9268 | 724.757  | 2172.256 | 2.07 | 0.0015  | 14.60529 |
| P01023     | 0 | 0.988  | 724.7572 | 2172.257 | 2.41 | 0.00175 | 6.73528  |
| P01023     | 0 | 0.8222 | 467.2544 | 1399.749 | 2.64 | 0.00123 | 29.99298 |
| P01023     | 0 | 1      | 686.9134 | 1372.82  | 0.31 | 0.00021 | 29.38097 |
| P01023     | 0 | 1      | 458.2786 | 1372.821 | 1.57 | 0.00072 | 35.90863 |
| P01023     | 0 | 0.9189 | 600.6641 | 1799.978 | 1.94 | 0.00117 | 5.935919 |
| P01023     | 0 | 0.98   | 600.6642 | 1799.978 | 2.15 | 0.00129 | 0        |
| P01023     | 0 | 0.9516 | 600.6641 | 1799.978 | 1.94 | 0.00117 | 0        |
| P01023     | 0 | 0.9762 | 542.9575 | 1626.858 | 1.72 | 0.00093 | 6.041781 |
| P01023     | 0 | 0.9184 | 549.0449 | 2193.158 | 2.09 | 0.00115 | 7.488667 |
| P01023     | 0 | 0.9697 | 615.0026 | 1842.993 | 3.24 | 0.00199 | 17.85872 |
| P01023     | 0 | 0.9701 | 713.0339 | 2137.087 | 1.24 | 0.00088 | 5.758836 |
| P01023     | 0 | 0.9    | 542.9574 | 1626.858 | 1.49 | 0.00081 | 7.878911 |
| P01023     | 0 | 1      | 813.9324 | 1626.857 | 1.39 | 0.00113 | 7.205064 |
| P01023; P2 | 0 | 0.6061 | 653.9038 | 1306.8   | 2.34 | 0.00153 | 5.954266 |
| P01023     | 0 | 1      | 669.6061 | 2675.402 | 1.27 | 0.00085 | 2.266198 |
| P01023     | 0 | 0.9773 | 667.9011 | 1334.795 | 2.08 | 0.00139 | 11.58764 |
| P01023     | 0 | 0.9792 | 615.0024 | 1842.993 | 2.84 | 0.00175 | 20.28931 |
| P01023     | 0 | 0.6863 | 615.0032 | 1842.995 | 4.14 | 0.00254 | 5.433955 |
| P01023     | 0 | 0.5484 | 615.0025 | 1842.993 | 3.04 | 0.00187 | 8.990729 |
| P01023     | 0 | 0.6923 | 615.0021 | 1842.992 | 2.45 | 0.0015  | 7.049337 |
| P01023     | 0 | 0.6154 | 615.0021 | 1842.992 | 2.45 | 0.0015  | 9.626925 |
| P01023     | 0 | 0.9074 | 615.0026 | 1842.993 | 3.14 | 0.00193 | 12.21332 |
| P01023     | 1 | 1      | 621.8855 | 2484.52  | 2.7  | 0.00168 | 8.62326  |
| P01023     | 0 | 1      | 868.9287 | 1736.85  | 1.38 | 0.0012  | 6.373858 |
| P01023     | 0 | 0.9714 | 579.6221 | 1736.852 | 2.36 | 0.00137 | 6.800303 |
| P01023     | 0 | 1      | 892.4728 | 2675.404 | 1.75 | 0.00156 | 3.653236 |
| P01023     | 0 | 0.9802 | 669.6061 | 2675.402 | 1.27 | 0.00085 | 5.482967 |
| P01023     | 1 | 1      | 497.7099 | 2484.52  | 2.73 | 0.00136 | 14.90488 |
| P01023     | 0 | 1      | 467.2535 | 1399.746 | 0.61 | 0.00029 | 0        |
| P01023     | 0 | 1      | 387.2061 | 1545.803 | 0.34 | 0.00013 | 5.037571 |
| P01023     | 0 | 1      | 423.2344 | 1689.916 | 6.95 | 0.00294 | 31.79756 |
| P01023     | 0 | 0.9545 | 468.9421 | 1404.812 | 2.04 | 0.00095 | 7.900205 |
| P01023     | 0 | 0.8611 | 702.9091 | 1404.811 | 1.37 | 0.00096 | 6.099411 |
| P01023     | 0 | 0.9744 | 636.0238 | 1906.057 | 2.34 | 0.00149 | 18.56458 |
| P01023     | 0 | 0.9756 | 636.0237 | 1906.057 | 2.25 | 0.00143 | 11.01091 |
| P01023     | 0 | 1      | 519.5781 | 1556.72  | 1.27 | 0.00066 | 26.70448 |
| P01023     | 0 | 0.9592 | 778.8635 | 1556.72  | 1.16 | 0.00091 | 0        |
| P01023     | 0 | 1      | 636.0238 | 1906.057 | 2.34 | 0.00149 | 53.67189 |
| P01023     | 0 | 0.5    | 636.0239 | 1906.057 | 2.44 | 0.00155 | 29.43455 |
| P01023     | 1 | 1      | 719.9817 | 3595.879 | 2.09 | 0.0015  | 16.71869 |
| P01023     | 1 | 1      | 1199.301 | 3595.887 | 4.34 | 0.0052  | 0        |
| P01023     | 0 | 0.9394 | 672.0964 | 2685.364 | 4.02 | 0.0027  | 13.98514 |
| P01023     | 0 | 1      | 865.4412 | 2594.309 | 1.57 | 0.00136 | 3.13237  |
| P01023     | 0 | 1      | 895.79   | 2685.355 | 0.84 | 0.00075 | 3.725401 |
| P01023     | 0 | 1      | 895.7903 | 2685.356 | 1.25 | 0.00112 | 4.04686  |
| P01023     | 0 | 1      | 895.7903 | 2685.356 | 1.18 | 0.00106 | 6.600752 |
| P01023     | 0 | 0.9189 | 895.7907 | 2685.357 | 1.59 | 0.00142 | 5.499063 |
| P01023     | 0 | 0.9231 | 672.0948 | 2685.357 | 1.56 | 0.00105 | 21.43341 |
| P01023     | 0 | 1      | 654.36   | 1961.065 | 1.62 | 0.00106 | 4.346309 |
| P01023     | 0 | 1      | 654.3604 | 1961.067 | 2.18 | 0.00143 | 6.267948 |

|            |   |        |          |          |      |          |          |
|------------|---|--------|----------|----------|------|----------|----------|
| P01023     | 0 | 1      | 691.6132 | 2763.431 | 1.62 | 0.00112  | 13.97519 |
| P01023     | 0 | 1      | 921.8156 | 2763.432 | 2    | 0.00185  | 10.62755 |
| P01023     | 0 | 0.9677 | 662.688  | 1986.049 | 1.92 | 0.00127  | 10.30199 |
| P01023     | 0 | 1      | 1117.284 | 3349.838 | 2.61 | 0.00291  | 12.13171 |
| P01023     | 0 | 1      | 838.2141 | 3349.834 | 1.64 | 0.00137  | 0.16785  |
| P01023     | 1 | 0.9118 | 603.6962 | 1809.074 | 1.82 | 0.0011   | 31.64408 |
| P01023     | 0 | 0.9808 | 561.634  | 1682.887 | 2.04 | 0.00115  | 8.237028 |
| P01023     | 0 | 0.74   | 631.6892 | 1893.053 | 2.98 | 0.00188  | 17.55057 |
| P01023     | 0 | 1      | 677.8773 | 1354.747 | 1.88 | 0.00127  | 2.220234 |
| P01023     | 0 | 1      | 783.7739 | 2349.307 | 4.02 | 0.00315  | 29.02278 |
| P01023     | 0 | 1      | 677.8772 | 1354.747 | 1.79 | 0.00121  | 2.754095 |
| P01023     | 1 | 1      | 667.3023 | 2666.187 | 1.92 | 0.00128  | 5.623496 |
| P01023     | 0 | 1      | 677.8773 | 1354.747 | 1.97 | 0.00134  | 5.492491 |
| P01023     | 1 | 1      | 667.3023 | 2666.187 | 1.83 | 0.00122  | 12.86255 |
| P01023     | 0 | 0.8684 | 768.9411 | 1536.875 | 0.72 | 0.00055  | 8.808555 |
| P01023     | 0 | 1      | 606.6401 | 1817.906 | 2.1  | 0.00127  | 13.22038 |
| P01023     | 0 | 1      | 455.2313 | 1817.903 | 0.65 | 0.0003   | 8.040416 |
| P01023     | 0 | 1      | 778.864  | 1556.721 | 1.79 | 0.00139  | 40.12609 |
| P01023     | 0 | 1      | 778.4401 | 2333.306 | 1.27 | 0.00098  | 4.35623  |
| P01023     | 0 | 1      | 519.5778 | 1556.719 | 0.57 | 0.00029  | 7.213981 |
| P01023     | 0 | 0.9583 | 778.8636 | 1556.72  | 1.32 | 0.00103  | 1.97534  |
| P01023     | 0 | 1      | 1167.156 | 2333.304 | 0.59 | 0.00069  | 0        |
| P01023     | 0 | 1      | 514.0389 | 2053.134 | 1.65 | 0.00085  | 23.81048 |
| P01023; P2 | 0 | 0.9899 | 743.0449 | 2227.12  | 2.48 | 0.00184  | 2.667964 |
| P01023     | 0 | 1      | 521.5719 | 1562.701 | 1.25 | 0.00065  | 5.452801 |
| P01023; P2 | 0 | 1      | 1114.065 | 2227.122 | 3.53 | 0.00393  | 4.164521 |
| P01023     | 0 | 1      | 521.572  | 1562.702 | 1.48 | 0.00077  | 23.34895 |
| P01023     | 0 | 1      | 423.232  | 1689.906 | 1.25 | 0.00053  | 5.262959 |
| P01023     | 0 | 1      | 563.9747 | 1689.909 | 3.2  | 0.0018   | 22.18463 |
| P01023     | 0 | 0.931  | 676.7228 | 2028.154 | 2.08 | 0.0014   | 50.31225 |
| P01023     | 0 | 1      | 515.9396 | 1545.804 | 1.42 | 0.00073  | 31.09629 |
| P01023     | 0 | 0.9831 | 685.3319 | 1369.657 | 1.98 | 0.00136  | 4.076197 |
| P01023     | 0 | 1      | 505.2575 | 1513.758 | 1.25 | 0.00063  | 16.81107 |
| P01023     | 0 | 1      | 677.8773 | 1354.747 | 1.97 | 0.00134  | 3.194145 |
| P01023     | 0 | 1      | 677.8773 | 1354.747 | 1.88 | 0.00127  | 3.806889 |
| P01023     | 0 | 0.9857 | 711.8984 | 1422.789 | 2.12 | 0.00151  | 6.787572 |
| P01023     | 0 | 0.7778 | 589.3388 | 1177.67  | 3.12 | 0.00184  | 9.470379 |
| P01023     | 0 | 0.8148 | 589.3383 | 1177.669 | 2.29 | 0.00135  | 6.338728 |
| P01023     | 0 | 0.7843 | 589.3382 | 1177.669 | 2.08 | 0.00123  | 14.11425 |
| P01023     | 0 | 0.7963 | 589.3383 | 1177.669 | 2.29 | 0.00135  | 6.168824 |
| P01023; P2 | 0 | 1      | 1114.064 | 2227.12  | 2.54 | 0.00283  | 0        |
| P01023; P2 | 0 | 1      | 617.0515 | 1849.14  | 2.86 | 0.00177  | 16.97725 |
| P01023; P2 | 0 | 1      | 743.0453 | 2227.121 | 3.06 | 0.00227  | 3.090556 |
| P01023; P2 | 0 | 0.8621 | 463.0398 | 1849.137 | 1.54 | 0.00071  | 11.29244 |
| P01023     | 0 | 1      | 607.07   | 2425.258 | -0.9 | -0.00055 | 43.2245  |
| P01023     | 0 | 1      | 1154.147 | 2307.288 | 2.06 | 0.00238  | 0        |
| P01023     | 0 | 1      | 769.7673 | 2307.287 | 1.9  | 0.00146  | 14.17074 |
| P01023     | 0 | 1      | 677.8777 | 1354.748 | 2.51 | 0.0017   | 2.123139 |
| P01023     | 0 | 1      | 1039.937 | 5195.658 | 3.87 | 0.00402  | 0        |
| P01023     | 0 | 1      | 677.8771 | 1354.747 | 1.7  | 0.00115  | 3.34785  |
| P01023     | 0 | 1      | 677.8771 | 1354.747 | 1.61 | 0.00109  | 3.531385 |
| P01023     | 0 | 1      | 677.8774 | 1354.748 | 2.15 | 0.00146  | 3.123936 |

|            |   |        |          |          |       |          |          |
|------------|---|--------|----------|----------|-------|----------|----------|
| P01023     | 0 | 1      | 677.8773 | 1354.747 | 1.97  | 0.00134  | 2.478673 |
| P01023; P2 | 0 | 1      | 1095.084 | 2189.16  | 0.65  | 0.00071  | 0        |
| P01023; P2 | 0 | 1      | 730.3897 | 2189.154 | -1.9  | -0.00138 | 15.28631 |
| P01023     | 0 | 1      | 702.3421 | 1403.677 | 1.69  | 0.00118  | 4.167675 |
| P01023     | 0 | 0.9868 | 752.0662 | 2254.184 | 2.03  | 0.00152  | 2.466944 |
| P01023     | 0 | 0.9661 | 752.0663 | 2254.184 | 2.11  | 0.00158  | 3.240089 |
| P01023     | 0 | 1      | 1033.556 | 3098.652 | 1.61  | 0.00166  | 0        |
| P01023     | 0 | 0.9701 | 838.2253 | 3349.88  | 1.68  | 0.0014   | 1.438799 |
| P01023     | 0 | 0.8889 | 752.0663 | 2254.184 | 2.11  | 0.00158  | 2.501437 |
| P01023; P2 | 0 | 1      | 1114.064 | 2227.121 | 2.98  | 0.00332  | 4.288647 |
| P01023     | 0 | 1      | 752.0661 | 2254.184 | 1.86  | 0.0014   | 1.864408 |
| P01023     | 0 | 1      | 521.572  | 1562.702 | 1.48  | 0.00077  | 51.19549 |
| P01023     | 0 | 1      | 606.6404 | 1817.907 | 2.5   | 0.00152  | 17.77935 |
| P01023     | 0 | 1      | 455.2316 | 1817.904 | 1.32  | 0.0006   | 9.142676 |
| P01023     | 0 | 1      | 518.319  | 1552.942 | 0.05  | 0.00003  | 28.66989 |
| P01023     | 0 | 1      | 455.2317 | 1817.905 | 1.52  | 0.00069  | 12.64895 |
| P01023     | 0 | 0.9925 | 1067.125 | 2133.242 | 0.39  | 0.00041  | 9.694853 |
| P01023     | 0 | 1      | 798.6685 | 2393.991 | 2.33  | 0.00186  | 61.75587 |
| P01023     | 0 | 1      | 798.6679 | 2393.989 | 1.64  | 0.00131  | 5.110663 |
| P01023     | 0 | 1      | 798.6679 | 2393.989 | 1.64  | 0.00131  | 7.813326 |
| P01023     | 0 | 1      | 711.7529 | 2133.244 | 1.47  | 0.00105  | 1.89923  |
| P01023     | 0 | 1      | 775.4192 | 3098.655 | 2.41  | 0.00187  | 0        |
| P01023     | 0 | 1      | 711.7528 | 2133.244 | 1.3   | 0.00092  | 22.4913  |
| P01023     | 0 | 0.4688 | 615.0017 | 1842.991 | 1.75  | 0.00108  | 5.753488 |
| P01023     | 0 | 1      | 677.8773 | 1354.747 | 1.88  | 0.00127  | 2.515475 |
| P01023     | 0 | 0.8696 | 477.2692 | 1906.055 | 1.41  | 0.00067  | 12.17062 |
| P01023     | 0 | 1      | 468.9413 | 1404.809 | 0.28  | 0.00013  | 43.92423 |
| P01023     | 0 | 1      | 471.544  | 1412.617 | 1.07  | 0.0005   | 0        |
| P01023     | 0 | 0.9474 | 468.941  | 1404.808 | -0.38 | -0.00018 | 37.72394 |
| P01023     | 0 | 0.9118 | 700.3777 | 1399.748 | 2.19  | 0.00154  | 6.289577 |
| P01023; P2 | 0 | 0.9655 | 464.609  | 1391.812 | 2.04  | 0.00094  | 50.13607 |
| P01023     | 0 | 0.9524 | 474.9347 | 1422.79  | 2.22  | 0.00105  | 10.07941 |
| P01023     | 0 | 0.75   | 802.1895 | 3205.736 | 2.86  | 0.00229  | 15.47247 |
| P01023     | 0 | 0.9756 | 452.2532 | 1354.745 | 0.21  | 0.00009  | 3.873488 |
| P01023     | 0 | 1      | 752.0646 | 2254.179 | -0.09 | -0.00006 | 0        |
| P01023     | 0 | 0.8182 | 405.2556 | 1213.752 | 1.34  | 0.00054  | 4.553275 |
| P01023     | 0 | 0.7872 | 486.7842 | 972.5611 | 1.74  | 0.00084  | 18.88784 |
| P01023     | 0 | 0.8571 | 468.5639 | 1403.677 | 1.85  | 0.00087  | 58.46535 |
| P01023     | 0 | 0.5    | 405.2554 | 1213.752 | 0.81  | 0.00033  | 39.57986 |
| P01023     | 0 | 0.5806 | 405.255  | 1213.751 | -0.09 | -0.00004 | 49.36704 |
| P01023     | 0 | 0.9429 | 600.6643 | 1799.978 | 2.35  | 0.00141  | 0        |
| P01023     | 0 | 0.814  | 677.8767 | 1354.746 | 1.07  | 0.00073  | 21.85669 |
| P01023     | 1 | 0.8    | 393.2269 | 1962.106 | 2.28  | 0.00089  | 23.59902 |
| P01023     | 0 | 0.8286 | 615.0046 | 1842.999 | 6.52  | 0.00401  | 0        |
| P01023     | 0 | 0.7586 | 405.2553 | 1213.751 | 0.51  | 0.00021  | 8.979755 |
| P01023     | 0 | 1      | 547.7781 | 2188.09  | 2.61  | 0.00143  | 32.73696 |
| P01023     | 1 | 0.4375 | 1151.263 | 3451.776 | 1.73  | 0.00199  | 5.981826 |
| P01023     | 0 | 0.5625 | 423.2327 | 1689.909 | 2.83  | 0.0012   | 46.02856 |
| P01023     | 0 | 0.7143 | 726.1441 | 3626.691 | 0.7   | 0.00051  | 2.533976 |
| P01023     | 0 | 0.9143 | 713.0324 | 2137.082 | -0.9  | -0.00064 | 0        |
| P01023     | 0 | 0.6667 | 393.2276 | 1177.668 | 1.34  | 0.00053  | 4.583789 |
| P01023     | 0 | 1      | 519.5779 | 1556.719 | 0.92  | 0.00048  | 44.75653 |

|            |   |        |          |          |       |          |          |
|------------|---|--------|----------|----------|-------|----------|----------|
| P01023     | 0 | 1      | 389.9351 | 1556.719 | 0.44  | 0.00017  | 30.94657 |
| P01023     | 0 | 0.9429 | 468.9408 | 1404.808 | -0.77 | -0.00036 | 18.63815 |
| P01023     | 1 | 1      | 631.2771 | 2522.087 | 2.52  | 0.00159  | 11.15758 |
| P01023     | 1 | 1      | 631.2771 | 2522.087 | 2.52  | 0.00159  | 11.15758 |
| P01023; P2 | 0 | 0.7105 | 436.2716 | 1306.8   | 2.21  | 0.00096  | 9.604411 |
| P01023     | 0 | 0.6444 | 393.2274 | 1177.668 | 0.8   | 0.00031  | 29.76438 |
| P01023     | 0 | 0.2564 | 470.2865 | 1408.845 | 3.29  | 0.00155  | 52.8643  |
| P01023     | 0 | 0.68   | 405.2556 | 1213.752 | 1.34  | 0.00054  | 75.17595 |
| P01023     | 0 | 0.6552 | 672.0945 | 2685.356 | 1.11  | 0.00074  | 2.29723  |
| P01023     | 0 | 1      | 521.5721 | 1562.702 | 1.6   | 0.00083  | 32.62658 |
| P01023     | 0 | 1      | 798.6696 | 2393.994 | 3.78  | 0.00302  | 8.278071 |
| P01023     | 0 | 0.5185 | 439.2957 | 1315.873 | 4.01  | 0.00176  | 14.33673 |
| P01023     | 0 | 0.8571 | 752.0658 | 2254.183 | 1.46  | 0.00109  | 11.14205 |
| P01023     | 0 | 0.975  | 452.2538 | 1354.747 | 1.56  | 0.0007   | 8.734811 |
| P01023     | 0 | 1      | 600.6636 | 1799.976 | 1.23  | 0.00074  | 32.24606 |
| P01023     | 0 | 0.9474 | 423.2329 | 1689.91  | 3.48  | 0.00147  | 8.568277 |
| P01023     | 0 | 0.9811 | 677.8775 | 1354.748 | 2.24  | 0.00152  | 2.232975 |
| P01023; P2 | 0 | 0.6552 | 464.6081 | 1391.81  | 0     | 0        | 36.77136 |
| P01023     | 0 | 0.6316 | 439.2942 | 1315.868 | 0.6   | 0.00026  | 18.97398 |
| P01023     | 0 | 0.9524 | 628.3242 | 1255.641 | -1.53 | -0.00096 | 11.70377 |
| P01023     | 0 | 1      | 900.4932 | 1799.979 | 2.8   | 0.00252  | 5.304621 |
| P01023     | 0 | 0.6222 | 527.3134 | 1053.62  | 1.23  | 0.00065  | 38.46835 |
| P01023     | 0 | 1      | 439.2946 | 1315.869 | 1.43  | 0.00063  | 34.20888 |
| P01023     | 0 | 1      | 798.6631 | 2393.975 | -4.4  | -0.00352 | 9.168782 |
| P01023; P2 | 0 | 1      | 617.0518 | 1849.141 | 3.36  | 0.00207  | 42.06173 |
| P01023     | 0 | 0.9211 | 745.3464 | 2234.025 | -1.14 | -0.00085 | 0        |
| P01023     | 0 | 1      | 752.066  | 2254.183 | 1.7   | 0.00128  | 4.003798 |
| P01023     | 0 | 0.9655 | 600.6644 | 1799.979 | 2.55  | 0.00153  | 2.951984 |
| P01023; P2 | 0 | 0.8    | 464.6089 | 1391.812 | 1.77  | 0.00082  | 10.83583 |
| P01023     | 0 | 0.7674 | 535.3288 | 1069.65  | 1.6   | 0.00086  | 8.342375 |
| P01023     | 0 | 0.7714 | 393.2278 | 1177.669 | 1.73  | 0.00068  | 15.26814 |
| P01023     | 0 | 0.6667 | 405.2558 | 1213.753 | 1.72  | 0.00069  | 48.55184 |
| P01023     | 0 | 0.9615 | 542.9572 | 1626.857 | 1.16  | 0.00063  | 0        |
| P01023     | 1 | 1      | 621.8861 | 2484.523 | 3.68  | 0.00229  | 7.659868 |
| P01023     | 0 | 0.9744 | 677.8779 | 1354.748 | 2.78  | 0.00189  | 4.563282 |
| P01023     | 0 | 1      | 518.3225 | 1552.953 | 6.77  | 0.00351  | 16.96815 |
| P01023     | 0 | 0.6842 | 491.0215 | 1961.064 | 0.9   | 0.00044  | 4.814834 |
| P01023     | 0 | 0.9048 | 600.6649 | 1799.98  | 3.26  | 0.00196  | 0        |
| P01023     | 0 | 0.9714 | 452.2538 | 1354.747 | 1.56  | 0.0007   | 5.141404 |
| P01023     | 0 | 1      | 662.6881 | 1986.05  | 2.02  | 0.00134  | 9.43444  |
| P01023     | 0 | 0.4444 | 745.3485 | 2234.031 | 1.65  | 0.00123  | 4.574406 |
| P01023; P2 | 0 | 0.5714 | 464.6095 | 1391.814 | 3.02  | 0.0014   | 67.77657 |
| P01023     | 0 | 0.3158 | 600.6645 | 1799.979 | 2.65  | 0.00159  | 53.22431 |
| P01023     | 0 | 1      | 946.1049 | 2836.3   | 3.47  | 0.00328  | 8.920265 |
| P01023     | 0 | 0.9524 | 477.2667 | 1906.045 | -3.91 | -0.00186 | 67.13512 |
| P01023     | 0 | 1      | 702.342  | 1403.677 | 1.51  | 0.00106  | 7.564545 |
| P01023     | 0 | 0.5938 | 708.8919 | 1416.777 | 1.12  | 0.0008   | 0        |
| P01023     | 0 | 0.8667 | 505.2576 | 1513.758 | 1.49  | 0.00075  | 25.45726 |
| P01023; P2 | 0 | 0.75   | 436.2735 | 1306.806 | 6.63  | 0.00289  | 20.89936 |
| P01023     | 0 | 0.825  | 452.2535 | 1354.746 | 1.02  | 0.00046  | 2.969825 |
| P01023     | 0 | 0.7    | 631.6887 | 1893.052 | 2.31  | 0.00146  | 44.51569 |
| P01023     | 0 | 0.9615 | 505.2578 | 1513.759 | 1.92  | 0.00097  | 13.41684 |

|            |   |        |          |          |       |          |          |
|------------|---|--------|----------|----------|-------|----------|----------|
| P01023     | 0 | 0.9474 | 752.0668 | 2254.186 | 2.84  | 0.00213  | 7.429555 |
| P01023     | 0 | 1      | 439.295  | 1315.87  | 2.41  | 0.00106  | 54.85983 |
| P01023     | 0 | 1      | 605.8259 | 1210.645 | 1.61  | 0.00098  | 0        |
| P01023     | 0 | 0.9048 | 649.3336 | 2594.312 | 2.83  | 0.00184  | 5.233872 |
| P01023     | 0 | 0.95   | 410.2448 | 1228.72  | 2.26  | 0.00092  | 4.187112 |
| P01023     | 0 | 1      | 730.0341 | 2188.088 | 1.39  | 0.00101  | 0        |
| P01023     | 0 | 0.92   | 474.9343 | 1422.788 | 1.32  | 0.00062  | 39.5909  |
| P01023     | 0 | 0.8182 | 486.7839 | 972.5605 | 1.05  | 0.00051  | 14.46875 |
| P01023     | 0 | 0.7895 | 636.0246 | 1906.059 | 3.59  | 0.00228  | 6.227667 |
| P01023     | 0 | 1      | 606.6391 | 1817.903 | 0.39  | 0.00024  | 0        |
| P01023     | 0 | 0.6429 | 752.0676 | 2254.188 | 3.81  | 0.00286  | 8.550724 |
| P01023     | 0 | 0.8421 | 639.8481 | 1278.689 | 3.51  | 0.00225  | 44.87497 |
| P01023     | 0 | 1      | 599.2527 | 2393.989 | 1.53  | 0.00092  | 18.53495 |
| P01023; P2 | 0 | 0.7692 | 653.9042 | 1306.801 | 2.9   | 0.00189  | 44.47319 |
| P01023     | 0 | 0.8113 | 517.2868 | 1033.566 | 1.67  | 0.00087  | 9.392795 |
| P01023     | 0 | 0.7143 | 575.7914 | 1150.576 | 3.01  | 0.00173  | 3.320632 |
| P01023     | 0 | 0.7391 | 615.0016 | 1842.99  | 1.55  | 0.00095  | 61.68029 |
| P01023     | 0 | 1      | 600.6661 | 1799.984 | 5.4   | 0.00324  | 21.15507 |
| P01023     | 0 | 1      | 599.2553 | 2393.999 | 5.81  | 0.00348  | 14.46319 |
| P01023     | 0 | 1      | 419.206  | 1673.802 | 1.37  | 0.00057  | 27.06233 |
| P01023     | 0 | 1      | 452.2541 | 1354.748 | 2.17  | 0.00098  | 2.590594 |
| P01023     | 0 | 0.5    | 549.0444 | 2193.156 | 1.09  | 0.0006   | 24.89062 |
| P01023     | 0 | 0.8333 | 654.3607 | 1961.067 | 2.65  | 0.00173  | 27.65699 |
| P01023     | 0 | 0.6207 | 393.2267 | 1177.666 | -0.91 | -0.00036 | 25.02374 |
| P01023     | 0 | 1      | 706.8131 | 1412.619 | 2.16  | 0.00152  | 49.13583 |
| P01023     | 0 | 0.6667 | 636.0241 | 1906.058 | 2.83  | 0.00179  | 49.4406  |
| P01023     | 0 | 1      | 388.9911 | 1552.942 | 0.08  | 0.00003  | 41.41932 |
| P01023     | 0 | 1      | 669.6071 | 2675.407 | 2.82  | 0.00188  | 25.44687 |
| P01023     | 0 | 0.8571 | 600.6645 | 1799.979 | 2.65  | 0.00159  | 4.70071  |
| P01023     | 0 | 1      | 615.002  | 1842.991 | 2.15  | 0.00132  | 67.14676 |
| P01023     | 0 | 1      | 547.7774 | 2188.088 | 1.38  | 0.00076  | 54.64318 |
| P01023     | 0 | 1      | 605.8272 | 1210.647 | 3.63  | 0.0022   | 13.26174 |
| P01023     | 0 | 0.9333 | 387.2065 | 1545.804 | 1.29  | 0.0005   | 5.772464 |
| P01023     | 0 | 0.7273 | 738.1112 | 2212.319 | 1.19  | 0.00088  | 5.444876 |
| P01023     | 0 | 0.4706 | 731.7236 | 2193.156 | 1.4   | 0.00102  | 71.64941 |
| P01023     | 0 | 1      | 521.5728 | 1562.704 | 2.89  | 0.0015   | 19.31788 |
| P01023     | 0 | 0.8    | 384.1964 | 1150.575 | 2.28  | 0.00088  | 7.292885 |
| P01023     | 0 | 1      | 662.6895 | 1986.054 | 4.14  | 0.00274  | 91.56047 |
| P01023     | 0 | 1      | 702.3418 | 1403.676 | 1.25  | 0.00088  | 0        |
| P01023     | 0 | 1      | 474.9342 | 1422.788 | 1.06  | 0.0005   | 38.92342 |
| P01023     | 0 | 0.7692 | 564.3023 | 2254.187 | 3.48  | 0.00196  | 13.82237 |
| P01023     | 0 | 1      | 745.3481 | 2234.03  | 1.16  | 0.00086  | 16.43969 |
| P01023     | 0 | 0.6957 | 841.9491 | 1682.891 | 4.15  | 0.0035   | 7.468262 |
| P01024     | 0 | 1      | 593.9952 | 1779.971 | 2.49  | 0.00148  | 37.95137 |
| P01024     | 0 | 0.8214 | 552.332  | 1103.657 | 2.34  | 0.00129  | 22.45925 |
| P01024     | 0 | 0.9434 | 648.6998 | 1944.085 | 6.86  | 0.00445  | 69.50312 |
| P01024     | 0 | 0.9298 | 648.6968 | 1944.076 | 2.34  | 0.00152  | 11.41728 |
| P01024     | 0 | 0.6047 | 601.295  | 1801.87  | 2.47  | 0.00148  | 23.21041 |
| P01024     | 0 | 0.9423 | 648.6976 | 1944.078 | 3.57  | 0.00231  | 16.26524 |
| P01024     | 0 | 1      | 545.5767 | 2179.285 | 2.16  | 0.00118  | 3.876989 |
| P01024     | 0 | 0.9143 | 486.7739 | 1944.074 | 1.14  | 0.00055  | 29.08276 |
| P01024     | 0 | 1      | 601.2952 | 1801.871 | 2.88  | 0.00173  | 25.90656 |

|        |   |        |          |          |       |          |          |
|--------|---|--------|----------|----------|-------|----------|----------|
| P01024 | 0 | 0.7447 | 509.5507 | 2035.181 | 1.42  | 0.00072  | 6.660112 |
| P01024 | 0 | 0.8966 | 679.065  | 2035.18  | 1.19  | 0.00081  | 4.139227 |
| P01024 | 0 | 1      | 545.5767 | 2179.285 | 2.16  | 0.00118  | 0        |
| P01024 | 0 | 0.9833 | 648.6969 | 1944.076 | 2.44  | 0.00158  | 10.29946 |
| P01024 | 0 | 0.9483 | 821.392  | 1641.777 | 4.69  | 0.00385  | 0        |
| P01024 | 0 | 1      | 781.4164 | 2342.235 | 1.12  | 0.00087  | 2.074238 |
| P01024 | 0 | 0.9464 | 829.4485 | 2486.331 | -1.26 | -0.00105 | 75.19083 |
| P01024 | 0 | 0.9531 | 821.3898 | 1641.772 | 2.01  | 0.00165  | 0        |
| P01024 | 0 | 1      | 764.4038 | 2291.197 | 9.63  | 0.00736  | 2.676936 |
| P01024 | 0 | 1      | 667.8662 | 1334.725 | 1.89  | 0.00126  | 4.218095 |
| P01024 | 0 | 1      | 773.0673 | 2317.187 | 2     | 0.00155  | 11.85977 |
| P01024 | 0 | 0.913  | 1159.097 | 2317.187 | 1.93  | 0.00224  | 0        |
| P01024 | 0 | 1      | 773.067  | 2317.186 | 1.61  | 0.00124  | 2.690153 |
| P01024 | 0 | 0.9524 | 545.3073 | 1633.907 | 2     | 0.00109  | 4.448252 |
| P01024 | 0 | 0.7321 | 545.3068 | 1633.906 | 1.1   | 0.0006   | 8.478786 |
| P01024 | 0 | 1      | 713.8809 | 2852.502 | 1.72  | 0.00122  | 19.79784 |
| P01024 | 0 | 0.9655 | 643.3654 | 1928.082 | 2.7   | 0.00173  | 10.92219 |
| P01024 | 0 | 0.9375 | 482.7758 | 1928.081 | 2.44  | 0.00118  | 30.63818 |
| P01024 | 0 | 0.9667 | 964.5443 | 1928.081 | 2.52  | 0.00243  | 6.61709  |
| P01024 | 0 | 0.9315 | 643.3641 | 1928.078 | 0.7   | 0.00045  | 8.456351 |
| P01024 | 0 | 1      | 677.8557 | 2708.401 | 2.26  | 0.00153  | 10.94703 |
| P01024 | 0 | 1      | 677.8557 | 2708.401 | 2.26  | 0.00153  | 10.94703 |
| P01024 | 0 | 0.9655 | 903.4715 | 2708.4   | 1.95  | 0.00176  | 1.543729 |
| P01024 | 0 | 0.9655 | 903.4715 | 2708.4   | 1.95  | 0.00176  | 1.543729 |
| P01024 | 0 | 0.7692 | 643.3655 | 1928.082 | 2.89  | 0.00186  | 23.44032 |
| P01024 | 0 | 1      | 951.5064 | 2852.504 | 2.73  | 0.00259  | 5.373587 |
| P01024 | 0 | 1      | 713.881  | 2852.502 | 1.89  | 0.00135  | 3.566138 |
| P01024 | 0 | 0.9756 | 677.855  | 2708.398 | 1.36  | 0.00092  | 4.459158 |
| P01024 | 0 | 0.9756 | 677.855  | 2708.398 | 1.36  | 0.00092  | 4.459158 |
| P01024 | 0 | 1      | 571.3068 | 2852.505 | 2.91  | 0.00166  | 18.25558 |
| P01024 | 0 | 1      | 717.88   | 2868.498 | 2.29  | 0.00164  | 17.22749 |
| P01024 | 0 | 0.9877 | 685.8701 | 1370.733 | 1.11  | 0.00076  | 0        |
| P01024 | 0 | 1      | 685.871  | 1370.735 | 2.44  | 0.00167  | 1.085531 |
| P01024 | 0 | 1      | 436.6629 | 2179.285 | 2.44  | 0.00106  | 5.054229 |
| P01024 | 0 | 1      | 727.0991 | 2179.283 | 1.16  | 0.00084  | 5.245312 |
| P01024 | 0 | 1      | 545.577  | 2179.286 | 2.84  | 0.00154  | 100      |
| P01024 | 0 | 1      | 727.0994 | 2179.284 | 1.67  | 0.00121  | 3.415468 |
| P01024 | 0 | 1      | 545.5765 | 2179.284 | 1.83  | 0.001    | 0.07832  |
| P01024 | 0 | 0.74   | 404.5566 | 1211.655 | 1.69  | 0.00068  | 7.581698 |
| P01024 | 1 | 1      | 559.3052 | 2234.199 | 0.05  | 0.00003  | 0        |
| P01024 | 1 | 1      | 559.3069 | 2234.206 | 3.11  | 0.00174  | 5.20824  |
| P01024 | 0 | 1      | 604.6198 | 1811.845 | 3.11  | 0.00188  | 26.74462 |
| P01024 | 1 | 0.7812 | 546.6722 | 1638.002 | 3.06  | 0.00167  | 32.58884 |
| P01024 | 0 | 1      | 906.4251 | 1811.843 | 2.14  | 0.00194  | 3.773589 |
| P01024 | 1 | 1      | 745.4066 | 2234.205 | 2.85  | 0.00212  | 5.490417 |
| P01024 | 0 | 1      | 545.5769 | 2179.286 | 2.61  | 0.00142  | 30.59536 |
| P01024 | 0 | 0.9394 | 604.6201 | 1811.846 | 3.72  | 0.00225  | 44.81252 |
| P01024 | 0 | 1      | 604.6201 | 1811.846 | 3.72  | 0.00225  | 25.64127 |
| P01024 | 0 | 1      | 517.9135 | 1551.726 | 1.94  | 0.00101  | 3.162104 |
| P01024 | 1 | 0.8056 | 382.488  | 1526.93  | 2.96  | 0.00113  | 34.47271 |
| P01024 | 1 | 1      | 500.6245 | 1499.859 | 1.09  | 0.00054  | 12.7227  |
| P01024 | 1 | 1      | 500.6247 | 1499.859 | 1.45  | 0.00073  | 9.206025 |

|        |   |        |          |          |      |         |          |
|--------|---|--------|----------|----------|------|---------|----------|
| P01024 | 1 | 1      | 500.6242 | 1499.858 | 0.54 | 0.00027 | 9.808579 |
| P01024 | 1 | 1      | 500.6242 | 1499.858 | 0.6  | 0.0003  | 0.457518 |
| P01024 | 1 | 1      | 500.6241 | 1499.858 | 0.36 | 0.00018 | 7.639125 |
| P01024 | 1 | 0.7736 | 559.9736 | 1677.906 | 3.2  | 0.00179 | 2.693383 |
| P01024 | 0 | 0.6176 | 479.6219 | 1436.851 | 3.31 | 0.00158 | 17.53735 |
| P01024 | 0 | 0.8269 | 717.3597 | 1433.712 | 1.47 | 0.00106 | 0        |
| P01024 | 0 | 0.1714 | 500.9683 | 1500.89  | 1.78 | 0.00089 | 36.92563 |
| P01024 | 0 | 0.6579 | 479.6218 | 1436.851 | 3.05 | 0.00146 | 17.65978 |
| P01024 | 0 | 1      | 404.7172 | 1615.847 | 0.58 | 0.00023 | 0        |
| P01024 | 0 | 0.6579 | 479.6212 | 1436.849 | 1.78 | 0.00085 | 4.07452  |
| P01024 | 1 | 0.6379 | 509.6471 | 1526.927 | 0.69 | 0.00035 | 8.713358 |
| P01024 | 1 | 1      | 462.6297 | 1385.875 | 2.01 | 0.00093 | 42.38081 |
| P01024 | 0 | 1      | 449.7461 | 1795.963 | 0.6  | 0.00027 | 14.97705 |
| P01024 | 0 | 0.8182 | 593.9951 | 1779.971 | 2.39 | 0.00142 | 12.24853 |
| P01024 | 2 | 0.475  | 505.3278 | 1513.969 | 1.39 | 0.0007  | 17.03609 |
| P01024 | 2 | 0.6038 | 505.3278 | 1513.969 | 1.33 | 0.00067 | 8.007991 |
| P01024 | 1 | 1      | 421.229  | 1681.894 | 1.84 | 0.00077 | 30.20753 |
| P01024 | 0 | 1      | 404.7175 | 1615.848 | 1.26 | 0.00051 | 5.012847 |
| P01024 | 0 | 1      | 539.2875 | 1615.848 | 1.08 | 0.00058 | 6.800458 |
| P01024 | 0 | 1      | 539.2874 | 1615.848 | 0.96 | 0.00052 | 40.68475 |
| P01024 | 1 | 0.25   | 509.6474 | 1526.928 | 1.35 | 0.00069 | 23.21803 |
| P01024 | 0 | 1      | 808.428  | 1615.849 | 1.58 | 0.00127 | 4.033058 |
| P01024 | 0 | 1      | 404.7176 | 1615.849 | 1.48 | 0.0006  | 25.83107 |
| P01024 | 0 | 1      | 539.2876 | 1615.848 | 1.3  | 0.0007  | 3.4591   |
| P01024 | 0 | 1      | 539.2878 | 1615.849 | 1.76 | 0.00095 | 10.41414 |
| P01024 | 0 | 0.9149 | 404.7178 | 1615.849 | 1.94 | 0.00078 | 6.508315 |
| P01024 | 0 | 0.9608 | 539.2878 | 1615.849 | 1.76 | 0.00095 | 10.07658 |
| P01024 | 0 | 1      | 708.5606 | 3538.774 | 3.46 | 0.00245 | 7.77293  |
| P01024 | 0 | 1      | 1079.048 | 2157.09  | 1.87 | 0.00202 | 0        |
| P01024 | 0 | 1      | 719.7012 | 2157.089 | 1.55 | 0.00112 | 0.297972 |
| P01024 | 0 | 1      | 1079.048 | 2157.09  | 1.87 | 0.00202 | 0        |
| P01024 | 0 | 1      | 719.7011 | 2157.089 | 1.38 | 0.001   | 0        |
| P01024 | 0 | 0.971  | 818.7418 | 2454.211 | 1.71 | 0.0014  | 7.653842 |
| P01024 | 0 | 0.987  | 818.7424 | 2454.213 | 2.38 | 0.00195 | 5.231061 |
| P01024 | 0 | 1      | 436.6633 | 2179.288 | 3.42 | 0.00149 | 51.87839 |
| P01024 | 0 | 1      | 719.7012 | 2157.089 | 1.55 | 0.00112 | 6.236691 |
| P01024 | 0 | 0.9859 | 723.0652 | 2167.181 | 1.55 | 0.00112 | 5.433462 |
| P01024 | 0 | 1      | 723.0645 | 2167.179 | 0.62 | 0.00045 | 6.48631  |
| P01024 | 0 | 1      | 545.5765 | 2179.284 | 1.94 | 0.00106 | 100      |
| P01024 | 0 | 1      | 708.5594 | 3538.768 | 1.82 | 0.00129 | 9.243796 |
| P01024 | 0 | 0.9565 | 885.4479 | 3538.77  | 2.41 | 0.00214 | 0        |
| P01024 | 0 | 1      | 885.4472 | 3538.767 | 1.59 | 0.0014  | 0.341497 |
| P01024 | 0 | 1      | 708.5595 | 3538.768 | 1.91 | 0.00135 | 5.899827 |
| P01024 | 0 | 1      | 885.4482 | 3538.771 | 2.76 | 0.00244 | 5.168289 |
| P01024 | 0 | 1      | 708.5593 | 3538.767 | 1.65 | 0.00117 | 3.159132 |
| P01024 | 0 | 1      | 708.5593 | 3538.767 | 1.65 | 0.00117 | 6.626089 |
| P01024 | 0 | 1      | 885.4475 | 3538.768 | 1.93 | 0.00171 | 0        |
| P01024 | 0 | 1      | 708.5598 | 3538.77  | 2.34 | 0.00166 | 3.931624 |
| P01024 | 0 | 1      | 885.4473 | 3538.767 | 1.72 | 0.00153 | 24.99987 |
| P01024 | 0 | 0.973  | 818.7416 | 2454.21  | 1.49 | 0.00121 | 5.830852 |
| P01024 | 0 | 1      | 818.7421 | 2454.212 | 2.08 | 0.0017  | 4.343169 |
| P01024 | 0 | 1      | 889.446  | 3554.762 | 1.64 | 0.00145 | 7.040766 |

|        |   |        |          |          |      |         |          |
|--------|---|--------|----------|----------|------|---------|----------|
| P01024 | 0 | 0.9545 | 614.3094 | 2454.216 | 3.67 | 0.00225 | 8.254519 |
| P01024 | 0 | 1      | 1227.609 | 2454.211 | 1.84 | 0.00226 | 0        |
| P01024 | 0 | 1      | 818.741  | 2454.209 | 0.74 | 0.0006  | 100      |
| P01024 | 0 | 1      | 818.7412 | 2454.209 | 0.96 | 0.00079 | 4.311306 |
| P01024 | 0 | 0.9423 | 614.3088 | 2454.213 | 2.67 | 0.00164 | 5.6736   |
| P01024 | 0 | 1      | 1227.61  | 2454.212 | 2.14 | 0.00262 | 0        |
| P01024 | 0 | 1      | 818.742  | 2454.211 | 1.93 | 0.00158 | 0.810201 |
| P01024 | 0 | 0.9811 | 818.7422 | 2454.212 | 2.16 | 0.00176 | 7.391229 |
| P01024 | 0 | 0.9737 | 770.7068 | 2310.106 | 0.5  | 0.00038 | 11.21178 |
| P01024 | 0 | 1      | 885.4475 | 3538.768 | 1.86 | 0.00165 | 0        |
| P01024 | 0 | 1      | 708.5595 | 3538.768 | 2    | 0.00141 | 3.006406 |
| P01024 | 0 | 1      | 885.4473 | 3538.767 | 1.72 | 0.00153 | 23.51777 |
| P01024 | 0 | 0.9    | 533.3051 | 2130.199 | 1.72 | 0.00091 | 17.39225 |
| P01024 | 0 | 0.963  | 885.448  | 3538.77  | 2.48 | 0.0022  | 0        |
| P01024 | 0 | 1      | 708.5591 | 3538.767 | 1.48 | 0.00105 | 3.553201 |
| P01024 | 0 | 1      | 885.4476 | 3538.769 | 2.07 | 0.00183 | 0.507234 |
| P01024 | 0 | 1      | 708.5595 | 3538.768 | 2    | 0.00141 | 3.487272 |
| P01024 | 0 | 1      | 885.4474 | 3538.768 | 1.79 | 0.00159 | 4.917524 |
| P01024 | 0 | 1      | 885.4476 | 3538.769 | 2.07 | 0.00183 | 0        |
| P01024 | 0 | 1      | 708.5591 | 3538.767 | 1.48 | 0.00105 | 5.691597 |
| P01024 | 0 | 1      | 885.448  | 3538.77  | 2.48 | 0.0022  | 0        |
| P01024 | 0 | 1      | 708.5595 | 3538.768 | 1.91 | 0.00135 | 3.317864 |
| P01024 | 0 | 0.8478 | 538.9664 | 1614.885 | 1.75 | 0.00094 | 10.92861 |
| P01024 | 0 | 0.8947 | 538.9663 | 1614.884 | 1.41 | 0.00076 | 5.872104 |
| P01024 | 0 | 0.9574 | 807.945  | 1614.883 | 0.51 | 0.00041 | 3.413648 |
| P01024 | 0 | 0.9667 | 648.6973 | 1944.077 | 3    | 0.00194 | 7.514337 |
| P01024 | 0 | 0.9661 | 545.3075 | 1633.908 | 2.45 | 0.00133 | 49.86577 |
| P01024 | 0 | 0.9348 | 586.3138 | 2342.233 | 0.56 | 0.00033 | 0        |
| P01024 | 0 | 0.9494 | 781.4172 | 2342.237 | 2.21 | 0.00173 | 2.119686 |
| P01024 | 0 | 0.9794 | 538.9661 | 1614.884 | 1.07 | 0.00058 | 3.013411 |
| P01024 | 0 | 1      | 1243.672 | 2486.336 | 0.98 | 0.00122 | 4.303097 |
| P01024 | 0 | 1      | 622.3396 | 2486.337 | 1.02 | 0.00063 | 4.441894 |
| P01024 | 0 | 1      | 829.4499 | 2486.335 | 0.43 | 0.00036 | 4.112293 |
| P01024 | 0 | 0.9821 | 622.3399 | 2486.338 | 1.51 | 0.00094 | 13.27589 |
| P01024 | 0 | 1      | 829.4497 | 2486.334 | 0.14 | 0.00011 | 4.470733 |
| P01024 | 0 | 1      | 764.404  | 2291.197 | 9.87 | 0.00754 | 13.31554 |
| P01024 | 0 | 1      | 764.4009 | 2291.188 | 5.88 | 0.00449 | 3.171816 |
| P01024 | 0 | 0.8721 | 817.4567 | 1633.906 | 1.37 | 0.00112 | 7.211819 |
| P01024 | 0 | 0.9355 | 545.3075 | 1633.908 | 2.45 | 0.00133 | 8.79669  |
| P01024 | 0 | 0.9877 | 817.457  | 1633.907 | 1.67 | 0.00137 | 100      |
| P01024 | 0 | 0.8772 | 817.4562 | 1633.905 | 0.7  | 0.00057 | 27.82294 |
| P01024 | 0 | 0.9298 | 892.4932 | 1783.979 | 2.66 | 0.00237 | 6.015945 |
| P01024 | 0 | 0.9667 | 545.3077 | 1633.909 | 2.9  | 0.00158 | 9.269956 |
| P01024 | 0 | 0.9524 | 817.4569 | 1633.907 | 1.6  | 0.0013  | 6.406536 |
| P01024 | 0 | 0.9508 | 545.3076 | 1633.908 | 2.67 | 0.00145 | 10.02113 |
| P01024 | 0 | 0.987  | 817.458  | 1633.909 | 2.94 | 0.0024  | 11.87791 |
| P01024 | 0 | 0.963  | 545.3074 | 1633.908 | 2.34 | 0.00127 | 8.653893 |
| P01024 | 0 | 0.9762 | 817.4572 | 1633.907 | 1.97 | 0.00161 | 19.651   |
| P01024 | 0 | 0.95   | 545.3076 | 1633.908 | 2.56 | 0.00139 | 12.01842 |
| P01024 | 0 | 0.9828 | 817.4578 | 1633.908 | 2.72 | 0.00222 | 36.32286 |
| P01024 | 0 | 1      | 545.3071 | 1633.907 | 1.66 | 0.00091 | 38.78336 |
| P01024 | 0 | 0.9561 | 817.457  | 1633.907 | 1.75 | 0.00143 | 12.78953 |



|        |   |        |          |          |      |         |          |
|--------|---|--------|----------|----------|------|---------|----------|
| P01024 | 0 | 0.8113 | 627.8696 | 1254.732 | 2.56 | 0.00161 | 2.607334 |
| P01024 | 0 | 0.8511 | 614.3352 | 1227.663 | 2.36 | 0.00145 | 20.10637 |
| P01024 | 0 | 0.48   | 493.8229 | 986.6385 | 1.86 | 0.00092 | 9.663264 |
| P01024 | 1 | 0.2903 | 439.2824 | 1315.832 | 1.91 | 0.00084 | 8.797668 |
| P01024 | 0 | 1      | 452.5906 | 1355.757 | 1.6  | 0.00072 | 45.51552 |
| P01024 | 1 | 0.3077 | 439.2826 | 1315.833 | 2.47 | 0.00108 | 27.98564 |
| P01024 | 0 | 1      | 452.5906 | 1355.757 | 1.6  | 0.00072 | 43.96957 |
| P01024 | 0 | 0.9762 | 505.6262 | 1514.864 | 2.52 | 0.00127 | 23.80364 |
| P01024 | 0 | 0.9649 | 757.9359 | 1514.865 | 2.81 | 0.00213 | 6.392227 |
| P01024 | 0 | 0.8833 | 599.3278 | 1795.969 | 4.14 | 0.00248 | 0        |
| P01024 | 0 | 0.8222 | 379.4718 | 1514.865 | 3.36 | 0.00127 | 55.39912 |
| P01024 | 0 | 1      | 505.626  | 1514.863 | 1.97 | 0.001   | 15.49325 |
| P01024 | 0 | 0.8636 | 599.3279 | 1795.969 | 4.24 | 0.00254 | 18.59867 |
| P01024 | 0 | 1      | 539.2883 | 1615.85  | 2.66 | 0.00143 | 25.12082 |
| P01024 | 0 | 0.7759 | 614.3356 | 1227.664 | 3.06 | 0.00188 | 2.981653 |
| P01024 | 0 | 0.4154 | 565.8745 | 1130.742 | 2.58 | 0.00146 | 7.371479 |
| P01024 | 0 | 1      | 436.6631 | 2179.286 | 2.79 | 0.00121 | 2.473919 |
| P01024 | 0 | 1      | 727.0996 | 2179.284 | 1.92 | 0.00139 | 7.673331 |
| P01024 | 0 | 1      | 545.5765 | 2179.284 | 1.83 | 0.001   | 6.238082 |
| P01024 | 0 | 0.7797 | 552.3321 | 1103.657 | 2.56 | 0.00141 | 3.287616 |
| P01024 | 0 | 0.7818 | 552.3318 | 1103.656 | 2.01 | 0.00111 | 2.873648 |
| P01024 | 0 | 0.7609 | 627.8701 | 1254.733 | 3.34 | 0.00209 | 3.136741 |
| P01024 | 0 | 0.7843 | 552.332  | 1103.657 | 2.45 | 0.00135 | 11.2597  |
| P01024 | 0 | 0.7966 | 552.3323 | 1103.657 | 3    | 0.00166 | 2.322246 |
| P01024 | 0 | 0.9792 | 678.3821 | 1355.757 | 1.34 | 0.00091 | 3.472347 |
| P01024 | 0 | 0.9153 | 452.5902 | 1355.756 | 0.65 | 0.00029 | 4.996224 |
| P01024 | 1 | 0.9444 | 398.9934 | 1592.952 | 2.8  | 0.00111 | 19.53598 |
| P01024 | 0 | 1      | 452.5904 | 1355.757 | 1.12 | 0.00051 | 9.758556 |
| P01024 | 1 | 0.85   | 531.6552 | 1592.951 | 2.15 | 0.00114 | 8.318783 |
| P01024 | 1 | 0.6667 | 531.6557 | 1592.953 | 3.19 | 0.00169 | 23.33697 |
| P01024 | 1 | 0.9286 | 398.9931 | 1592.951 | 2.03 | 0.00081 | 15.11184 |
| P01024 | 0 | 0.7805 | 717.3588 | 1433.71  | 0.19 | 0.00014 | 13.20949 |
| P01024 | 1 | 0.9412 | 398.9931 | 1592.951 | 1.95 | 0.00078 | 10.61745 |
| P01024 | 0 | 0.9091 | 452.5912 | 1355.759 | 2.81 | 0.00127 | 14.27592 |
| P01024 | 0 | 1      | 452.5906 | 1355.757 | 1.39 | 0.00063 | 15.19212 |
| P01024 | 0 | 0.9796 | 452.5908 | 1355.758 | 1.93 | 0.00087 | 14.00225 |
| P01024 | 1 | 0.7234 | 445.9579 | 1335.859 | 1.46 | 0.00065 | 25.19195 |
| P01024 | 0 | 0.7045 | 479.6211 | 1436.849 | 1.58 | 0.00076 | 8.234904 |
| P01024 | 0 | 0.7273 | 479.6212 | 1436.849 | 1.78 | 0.00085 | 9.625485 |
| P01024 | 1 | 0.7    | 559.9732 | 1677.905 | 2.44 | 0.00136 | 32.8424  |
| P01024 | 0 | 0.7179 | 479.6214 | 1436.85  | 2.35 | 0.00113 | 11.22186 |
| P01024 | 1 | 0.9167 | 398.9931 | 1592.95  | 1.88 | 0.00075 | 21.71409 |
| P01024 | 0 | 0.6585 | 479.6215 | 1436.85  | 2.41 | 0.00116 | 12.99561 |
| P01024 | 0 | 0.7619 | 479.6214 | 1436.85  | 2.35 | 0.00113 | 27.29515 |
| P01024 | 0 | 0.6667 | 479.6218 | 1436.851 | 3.11 | 0.00149 | 14.04478 |
| P01024 | 0 | 0.6905 | 479.6212 | 1436.849 | 1.9  | 0.00091 | 16.52369 |
| P01024 | 0 | 0.7333 | 479.6214 | 1436.85  | 2.29 | 0.00109 | 11.54833 |
| P01024 | 1 | 0.7111 | 445.9574 | 1335.858 | 0.37 | 0.00016 | 14.46041 |
| P01024 | 1 | 0.8974 | 761.4191 | 2282.243 | 1.99 | 0.00151 | 6.6009   |
| P01024 | 0 | 1      | 880.0888 | 2638.252 | 0.65 | 0.00057 | 3.87396  |
| P01024 | 0 | 0.5581 | 648.0346 | 1942.089 | 0.25 | 0.00016 | 39.22734 |
| P01024 | 1 | 0.9375 | 761.4193 | 2282.243 | 2.15 | 0.00164 | 3.963768 |

|        |   |        |          |          |       |          |          |
|--------|---|--------|----------|----------|-------|----------|----------|
| P01024 | 0 | 0.1864 | 565.8757 | 1130.744 | 4.74  | 0.00268  | 40.80844 |
| P01024 | 1 | 0.7609 | 761.4207 | 2282.247 | 4     | 0.00304  | 5.130354 |
| P01024 | 0 | 1      | 880.0868 | 2638.246 | -1.64 | -0.00144 | 2.652258 |
| P01024 | 1 | 0.9615 | 444.2821 | 1330.832 | 1.66  | 0.00074  | 9.334938 |
| P01024 | 1 | 1      | 761.4192 | 2282.243 | 2.07  | 0.00157  | 37.35952 |
| P01024 | 1 | 0.8889 | 761.4199 | 2282.245 | 2.95  | 0.00225  | 11.34416 |
| P01024 | 0 | 1      | 880.0892 | 2638.253 | 1.14  | 0.001    | 29.35386 |
| P01024 | 0 | 0.8519 | 593.9957 | 1779.972 | 3.31  | 0.00197  | 8.375484 |
| P01024 | 0 | 1      | 445.7482 | 1779.971 | 2.41  | 0.00107  | 39.3562  |
| P01024 | 1 | 0.8043 | 761.4177 | 2282.238 | 0.06  | 0.00005  | 20.46719 |
| P01024 | 0 | 0.9524 | 452.5903 | 1355.756 | 0.92  | 0.00042  | 13.98257 |
| P01024 | 1 | 0.9216 | 761.4191 | 2282.243 | 1.91  | 0.00145  | 4.502548 |
| P01024 | 0 | 1      | 539.2879 | 1615.849 | 1.87  | 0.00101  | 13.56889 |
| P01024 | 1 | 0.8824 | 761.4188 | 2282.242 | 1.51  | 0.00115  | 2.344328 |
| P01024 | 0 | 0.8868 | 452.5901 | 1355.756 | 0.38  | 0.00017  | 3.983469 |
| P01024 | 0 | 1      | 539.2878 | 1615.849 | 1.64  | 0.00088  | 13.87055 |
| P01024 | 1 | 0.9355 | 761.4181 | 2282.24  | 0.63  | 0.00048  | 7.413558 |
| P01024 | 1 | 0.9138 | 761.421  | 2282.249 | 4.48  | 0.00341  | 3.387928 |
| P01024 | 0 | 1      | 880.0869 | 2638.246 | -1.57 | -0.00138 | 2.419894 |
| P01024 | 1 | 0.9815 | 761.4202 | 2282.246 | 3.35  | 0.00255  | 5.263799 |
| P01024 | 1 | 0.8462 | 761.4199 | 2282.245 | 3.03  | 0.00231  | 3.173436 |
| P01024 | 1 | 0.9    | 761.4195 | 2282.244 | 2.47  | 0.00188  | 16.02841 |
| P01024 | 0 | 0.9324 | 670.6868 | 2010.046 | 2.23  | 0.00149  | 0        |
| P01024 | 0 | 0.8    | 648.0354 | 1942.092 | 1.48  | 0.00096  | 30.38441 |
| P01024 | 1 | 0.9672 | 761.4216 | 2282.25  | 5.28  | 0.00402  | 12.49604 |
| P01024 | 0 | 0.875  | 670.6866 | 2010.045 | 1.96  | 0.00131  | 0        |
| P01024 | 0 | 0.9833 | 880.0895 | 2638.254 | 1.48  | 0.0013   | 2.842493 |
| P01024 | 0 | 0.6579 | 648.0355 | 1942.092 | 1.67  | 0.00108  | 44.11722 |
| P01024 | 0 | 0.9231 | 670.6868 | 2010.046 | 2.32  | 0.00156  | 2.802096 |
| P01024 | 0 | 0.8986 | 648.0354 | 1942.092 | 1.48  | 0.00096  | 16.97169 |
| P01024 | 0 | 1      | 880.0879 | 2638.249 | -0.39 | -0.00034 | 4.352894 |
| P01024 | 1 | 0.9    | 761.4209 | 2282.248 | 4.32  | 0.00328  | 2.982988 |
| P01024 | 0 | 1      | 1084.054 | 2167.102 | 3.06  | 0.00331  | 8.356995 |
| P01024 | 0 | 0.1806 | 1042.547 | 2084.086 | 1.85  | 0.00193  | 5.602253 |
| P01024 | 0 | 0.3418 | 695.3663 | 2084.084 | 1     | 0.00069  | 4.510385 |
| P01024 | 0 | 1      | 1012.003 | 2022.999 | 2.86  | 0.00289  | 3.764683 |
| P01024 | 0 | 0.963  | 723.0391 | 2167.103 | 3.53  | 0.00255  | 8.778992 |
| P01024 | 0 | 0.4545 | 1031.486 | 3092.444 | 2.74  | 0.00283  | 9.352146 |
| P01024 | 0 | 0.9487 | 648.0374 | 1942.098 | 4.59  | 0.00297  | 0        |
| P01024 | 0 | 1      | 880.0918 | 2638.261 | 4.05  | 0.00356  | 5.807326 |
| P01024 | 0 | 1      | 1026.153 | 3076.445 | 1.54  | 0.00158  | 3.8727   |
| P01024 | 0 | 1      | 1080.466 | 2159.924 | 2.26  | 0.00245  | 9.413045 |
| P01024 | 0 | 1      | 768.6799 | 2304.025 | 1.61  | 0.00124  | 2.971451 |
| P01024 | 0 | 1      | 1152.516 | 2304.026 | 1.8   | 0.00207  | 3.204306 |
| P01024 | 0 | 0.6    | 970.4957 | 1939.984 | 2     | 0.00194  | 0        |
| P01024 | 0 |        | 773.8648 | 3092.437 | 0.63  | 0.00049  | 0        |
| P01024 | 0 | 0.0306 | 773.8648 | 3092.437 | 0.63  | 0.00049  | 0        |
| P01024 | 0 | 0.4545 | 1031.486 | 3092.444 | 2.74  | 0.00283  | 9.352146 |
| P01024 | 1 | 0.9344 | 761.4182 | 2282.24  | 0.71  | 0.00054  | 3.485296 |
| P01024 | 0 | 0.9306 | 670.6862 | 2010.044 | 1.32  | 0.00088  | 0        |
| P01024 | 1 | 0.9286 | 761.419  | 2282.242 | 1.75  | 0.00133  | 6.640753 |
| P01024 | 0 | 0.9355 | 670.6861 | 2010.044 | 1.23  | 0.00082  | 10.24611 |

|        |   |        |          |          |       |          |          |
|--------|---|--------|----------|----------|-------|----------|----------|
| P01024 | 1 | 0.902  | 761.4188 | 2282.242 | 1.59  | 0.00121  | 2.050617 |
| P01024 | 0 | 1      | 599.328  | 1795.969 | 4.45  | 0.00266  | 29.71358 |
| P01024 | 0 | 1      | 539.2877 | 1615.848 | 1.42  | 0.00076  | 17.5169  |
| P01024 | 0 | 1      | 539.2866 | 1615.845 | -0.62 | -0.00034 | 0        |
| P01024 | 0 | 0.9467 | 670.6867 | 2010.046 | 2.14  | 0.00143  | 3.880956 |
| P01024 | 0 | 1      | 539.2877 | 1615.848 | 1.42  | 0.00076  | 18.17202 |
| P01024 | 1 | 0.8906 | 761.419  | 2282.242 | 1.83  | 0.00139  | 4.562738 |
| P01024 | 0 | 0.9455 | 880.0884 | 2638.251 | 0.16  | 0.00015  | 0        |
| P01024 | 1 | 0.9535 | 761.4212 | 2282.249 | 4.72  | 0.00359  | 12.9066  |
| P01024 | 0 | 1      | 880.0883 | 2638.25  | 0.03  | 0.00002  | 0        |
| P01024 | 0 | 1      | 539.2873 | 1615.847 | 0.74  | 0.0004   | 4.549528 |
| P01024 | 1 | 0.8913 | 761.4191 | 2282.243 | 1.99  | 0.00151  | 4.720218 |
| P01024 | 0 | 0.9344 | 670.6871 | 2010.047 | 2.69  | 0.0018   | 6.167407 |
| P01024 | 0 | 1      | 880.085  | 2638.241 | -3.65 | -0.00321 | 30.59231 |
| P01024 | 0 | 0.8696 | 404.7176 | 1615.849 | 1.48  | 0.0006   | 42.89047 |
| P01024 | 0 | 1      | 539.2873 | 1615.847 | 0.74  | 0.0004   | 8.734681 |
| P01024 | 1 | 1      | 446.2946 | 1336.869 | 1.16  | 0.00052  | 20.85666 |
| P01024 | 0 | 1      | 539.2877 | 1615.849 | 1.53  | 0.00082  | 24.84494 |
| P01024 | 1 | 1      | 438.9669 | 1314.886 | 2.07  | 0.00091  | 12.78033 |
| P01024 | 1 | 1      | 761.4183 | 2282.24  | 0.87  | 0.00066  | 27.87403 |
| P01024 | 1 | 1      | 500.6249 | 1499.86  | 2     | 0.001    | 25.45837 |
| P01024 | 0 | 0.9677 | 670.687  | 2010.046 | 2.5   | 0.00168  | 4.018288 |
| P01024 | 0 | 0.9831 | 880.0894 | 2638.254 | 1.28  | 0.00112  | 2.684968 |
| P01024 | 0 | 0.925  | 404.7176 | 1615.849 | 1.56  | 0.00063  | 30.38656 |
| P01024 | 0 | 1      | 808.4278 | 1615.848 | 1.35  | 0.00109  | 3.145079 |
| P01024 | 0 | 1      | 808.4282 | 1615.849 | 1.88  | 0.00152  | 4.862577 |
| P01024 | 0 | 1      | 404.7175 | 1615.848 | 1.33  | 0.00054  | 19.44222 |
| P01024 | 0 | 1      | 539.2875 | 1615.848 | 1.19  | 0.00064  | 4.629321 |
| P01024 | 0 | 1      | 808.428  | 1615.849 | 1.65  | 0.00133  | 0        |
| P01024 | 0 | 0.9565 | 670.6865 | 2010.045 | 1.78  | 0.00119  | 3.172601 |
| P01024 | 0 | 1      | 404.7178 | 1615.849 | 1.94  | 0.00078  | 5.598609 |
| P01024 | 0 | 1      | 539.2875 | 1615.848 | 1.08  | 0.00058  | 4.269525 |
| P01024 | 0 | 1      | 808.4285 | 1615.85  | 2.18  | 0.00176  | 2.470858 |
| P01024 | 0 | 0.8852 | 404.7175 | 1615.848 | 1.33  | 0.00054  | 4.594302 |
| P01024 | 0 | 1      | 539.2877 | 1615.849 | 1.53  | 0.00082  | 4.341512 |
| P01024 | 0 | 1      | 808.4282 | 1615.849 | 1.8   | 0.00146  | 2.873106 |
| P01024 | 0 | 1      | 404.7173 | 1615.847 | 0.73  | 0.00029  | 4.789752 |
| P01024 | 1 | 0.9    | 761.4196 | 2282.244 | 2.63  | 0.002    | 0        |
| P01024 | 0 | 1      | 539.2875 | 1615.848 | 1.08  | 0.00058  | 4.012166 |
| P01024 | 1 | 0.8793 | 761.4183 | 2282.24  | 0.87  | 0.00066  | 32.48347 |
| P01024 | 0 | 0.975  | 648.0365 | 1942.095 | 3.18  | 0.00206  | 61.31683 |
| P01024 | 1 | 0.8824 | 571.3174 | 2282.248 | 4.12  | 0.00235  | 6.924332 |
| P01024 | 0 | 1      | 880.0885 | 2638.251 | 0.3   | 0.00027  | 12.97281 |
| P01024 | 0 | 0.9839 | 616.3031 | 1846.895 | -0.03 | -0.00002 | 4.132455 |
| P01024 | 0 | 0.5763 | 690.9221 | 1380.837 | 2.01  | 0.00139  | 36.86774 |
| P01024 | 0 | 1      | 923.9509 | 1846.894 | -0.19 | -0.00017 | 3.650021 |
| P01024 | 1 | 0.9167 | 761.419  | 2282.242 | 1.75  | 0.00133  | 7.377662 |
| P01024 | 0 | 0.8254 | 648.0364 | 1942.095 | 3.08  | 0.002    | 12.78503 |
| P01024 | 1 | 0.9333 | 761.4191 | 2282.243 | 1.91  | 0.00145  | 6.414845 |
| P01024 | 0 | 0.675  | 648.0352 | 1942.091 | 1.1   | 0.00071  | 26.09475 |
| P01024 | 0 | 0.9429 | 648.036  | 1942.093 | 2.42  | 0.00157  | 30.82415 |
| P01024 | 1 | 0.9048 | 571.3163 | 2282.243 | 2.2   | 0.00125  | 8.829834 |

|        |   |        |          |          |       |          |          |
|--------|---|--------|----------|----------|-------|----------|----------|
| P01024 | 0 | 1      | 923.9526 | 1846.898 | 1.73  | 0.0016   | 4.3608   |
| P01024 | 1 | 0.8261 | 761.4199 | 2282.245 | 2.95  | 0.00225  | 18.41693 |
| P01024 | 1 | 0.92   | 761.4189 | 2282.242 | 1.67  | 0.00127  | 18.11844 |
| P01024 | 0 | 0.6757 | 616.3038 | 1846.897 | 1.16  | 0.00071  | 3.551825 |
| P01024 | 0 | 1      | 880.0889 | 2638.252 | 0.79  | 0.00069  | 2.832625 |
| P01024 | 0 | 1      | 880.0894 | 2638.254 | 1.28  | 0.00112  | 2.80819  |
| P01024 | 0 | 0.987  | 660.3187 | 2638.253 | 1.02  | 0.00067  | 17.67423 |
| P01024 | 0 | 1      | 880.0898 | 2638.255 | 1.83  | 0.00161  | 2.018876 |
| P01024 | 0 | 0.4    | 648.0354 | 1942.092 | 1.48  | 0.00096  | 22.53575 |
| P01024 | 1 | 0.9787 | 707.0366 | 2119.095 | 1.64  | 0.00116  | 7.482587 |
| P01024 | 0 | 0.806  | 662.7039 | 1986.097 | 2.16  | 0.00143  | 4.808304 |
| P01024 | 1 | 0.9111 | 530.5298 | 2119.097 | 2.59  | 0.00137  | 17.67368 |
| P01024 | 1 | 0.9737 | 707.0364 | 2119.095 | 1.38  | 0.00098  | 7.659843 |
| P01024 | 0 | 1      | 1319.631 | 2638.255 | 2     | 0.00264  | 9.373337 |
| P01024 | 1 | 1      | 530.5297 | 2119.097 | 2.36  | 0.00125  | 43.08799 |
| P01024 | 0 | 0.9908 | 660.319  | 2638.254 | 1.48  | 0.00098  | 3.707511 |
| P01024 | 1 | 0.9815 | 707.037  | 2119.096 | 2.16  | 0.00153  | 6.283272 |
| P01024 | 0 | 0.8108 | 923.9515 | 1846.896 | 0.54  | 0.0005   | 0        |
| P01024 | 1 | 0.9412 | 761.4189 | 2282.242 | 1.67  | 0.00127  | 5.917617 |
| P01024 | 0 | 0.8429 | 648.0363 | 1942.094 | 2.8   | 0.00181  | 22.36613 |
| P01024 | 0 | 0.8036 | 648.0354 | 1942.092 | 1.48  | 0.00096  | 9.21777  |
| P01024 | 1 | 1      | 761.419  | 2282.242 | 1.75  | 0.00133  | 9.783814 |
| P01024 | 0 | 0.9231 | 648.0363 | 1942.094 | 2.89  | 0.00187  | 11.99699 |
| P01024 | 1 | 1      | 761.419  | 2282.242 | 1.75  | 0.00133  | 19.75056 |
| P01024 | 1 | 0.7941 | 571.3159 | 2282.242 | 1.56  | 0.00089  | 11.30107 |
| P01024 | 0 | 0.875  | 648.0355 | 1942.092 | 1.67  | 0.00108  | 3.824559 |
| P01024 | 1 | 0.9608 | 761.4165 | 2282.235 | -1.46 | -0.00111 | 9.068006 |
| P01024 | 1 | 0.8611 | 571.3149 | 2282.238 | -0.26 | -0.00015 | 14.39237 |
| P01024 | 0 | 0.9242 | 648.0361 | 1942.094 | 2.61  | 0.00169  | 7.364186 |
| P01024 | 1 | 0.9683 | 761.419  | 2282.242 | 1.75  | 0.00133  | 8.865488 |
| P01024 | 0 | 0.9211 | 648.0358 | 1942.093 | 2.05  | 0.00132  | 12.63833 |
| P01024 | 1 | 0.9383 | 761.4192 | 2282.243 | 2.07  | 0.00157  | 7.281392 |
| P01024 | 1 | 0.9375 | 761.4184 | 2282.241 | 1.03  | 0.00078  | 6.09685  |
| P01024 | 1 | 0.9344 | 761.4194 | 2282.244 | 2.31  | 0.00176  | 2.576102 |
| P01024 | 0 | 0.8909 | 648.0353 | 1942.091 | 1.39  | 0.0009   | 20.91998 |
| P01024 | 1 | 0.918  | 761.4193 | 2282.243 | 2.23  | 0.0017   | 7.300451 |
| P01024 | 0 | 0.8462 | 648.0355 | 1942.092 | 1.67  | 0.00108  | 2.028035 |
| P01024 | 1 | 0.8056 | 571.3177 | 2282.249 | 4.66  | 0.00266  | 9.397661 |
| P01024 | 1 | 0.8462 | 761.4197 | 2282.244 | 2.71  | 0.00206  | 10.88882 |
| P01024 | 0 | 0.8983 | 648.0366 | 1942.095 | 3.27  | 0.00212  | 8.427519 |
| P01024 | 0 | 0.7073 | 648.0366 | 1942.095 | 3.27  | 0.00212  | 14.12922 |
| P01024 | 1 | 0.9595 | 761.419  | 2282.242 | 1.75  | 0.00133  | 3.373013 |
| P01024 | 0 | 0.8382 | 648.036  | 1942.093 | 2.33  | 0.00151  | 10.09873 |
| P01024 | 0 | 0.9333 | 648.0361 | 1942.094 | 2.61  | 0.00169  | 35.28796 |
| P01024 | 1 | 0.9706 | 761.4194 | 2282.244 | 2.31  | 0.00176  | 8.841187 |
| P01024 | 0 | 0.9412 | 648.036  | 1942.093 | 2.42  | 0.00157  | 45.84824 |
| P01024 | 0 | 0.8043 | 648.0361 | 1942.094 | 2.61  | 0.00169  | 42.89344 |
| P01024 | 0 | 0.9474 | 648.0373 | 1942.097 | 4.4   | 0.00285  | 9.958298 |
| P01024 | 0 | 0.8816 | 648.0362 | 1942.094 | 2.71  | 0.00175  | 12.58057 |
| P01024 | 1 | 0.9062 | 761.4197 | 2282.244 | 2.71  | 0.00206  | 37.12178 |
| P01024 | 0 | 0.8769 | 648.0362 | 1942.094 | 2.71  | 0.00175  | 19.07158 |
| P01024 | 0 | 0.9    | 692.7304 | 2076.177 | 1.68  | 0.00117  | 11.53498 |

|        |   |        |          |          |      |         |          |
|--------|---|--------|----------|----------|------|---------|----------|
| P01024 | 1 | 1      | 761.4197 | 2282.244 | 2.71 | 0.00206 | 39.31753 |
| P01024 | 1 | 1      | 761.4191 | 2282.243 | 1.99 | 0.00151 | 22.55211 |
| P01024 | 1 | 0.75   | 571.3154 | 2282.24  | 0.59 | 0.00034 | 17.10268 |
| P01024 | 0 | 0.8657 | 648.0366 | 1942.095 | 3.27 | 0.00212 | 15.68917 |
| P01024 | 1 | 1      | 761.419  | 2282.242 | 1.83 | 0.00139 | 4.333237 |
| P01024 | 1 | 0.9661 | 571.318  | 2282.25  | 5.19 | 0.00296 | 29.19534 |
| P01024 | 0 | 0.8333 | 648.0356 | 1942.092 | 1.76 | 0.00114 | 5.695469 |
| P01024 | 1 | 1      | 761.4186 | 2282.241 | 1.35 | 0.00103 | 11.09221 |
| P01024 | 1 | 0.9074 | 571.317  | 2282.246 | 3.37 | 0.00193 | 3.669082 |
| P01024 | 0 | 0.9306 | 648.0364 | 1942.095 | 3.08 | 0.002   | 7.510995 |
| P01024 | 1 | 0.9677 | 761.4182 | 2282.24  | 0.79 | 0.0006  | 9.209319 |
| P01024 | 0 | 0.9265 | 648.0361 | 1942.094 | 2.52 | 0.00163 | 19.23264 |
| P01024 | 1 | 0.92   | 761.419  | 2282.242 | 1.83 | 0.00139 | 6.783161 |
| P01024 | 1 | 0.8627 | 571.3165 | 2282.244 | 2.63 | 0.0015  | 64.50167 |
| P01024 | 0 | 0.8551 | 648.0359 | 1942.093 | 2.23 | 0.00145 | 7.416413 |
| P01024 | 1 | 0.9143 | 571.3154 | 2282.24  | 0.59 | 0.00034 | 28.90779 |
| P01024 | 1 | 0.9074 | 761.4202 | 2282.246 | 3.43 | 0.00261 | 4.877081 |
| P01024 | 1 | 0.9429 | 761.4189 | 2282.242 | 1.67 | 0.00127 | 0        |
| P01024 | 0 | 0.8824 | 648.0367 | 1942.095 | 3.46 | 0.00224 | 39.88945 |
| P01024 | 0 | 0.9853 | 880.0902 | 2638.256 | 2.18 | 0.00192 | 1.615159 |
| P01024 | 0 | 0.8667 | 480.9416 | 1440.81  | 0.84 | 0.0004  | 62.54494 |
| P01024 | 0 | 0.8902 | 720.9092 | 1440.811 | 1.51 | 0.00109 | 6.512867 |
| P01024 | 0 | 0.7308 | 480.9422 | 1440.812 | 2.11 | 0.00101 | 8.009255 |
| P01024 | 0 | 0.625  | 480.9419 | 1440.811 | 1.48 | 0.00071 | 12.71878 |
| P01024 | 1 | 0.9688 | 761.4196 | 2282.244 | 2.55 | 0.00194 | 6.01217  |
| P01024 | 1 | 0.6111 | 761.4182 | 2282.24  | 0.71 | 0.00054 | 4.595315 |
| P01024 | 1 | 0.9149 | 761.4197 | 2282.245 | 2.79 | 0.00212 | 2.546978 |
| P01024 | 0 | 0.7407 | 587.8704 | 1174.734 | 4.28 | 0.00252 | 100      |
| P01024 | 0 | 0.6809 | 480.9418 | 1440.811 | 1.35 | 0.00065 | 10.30435 |
| P01024 | 0 | 0.8868 | 714.3781 | 1427.749 | 2.74 | 0.00196 | 7.10457  |
| P01024 | 0 | 0.9048 | 757.9217 | 1514.836 | 1.72 | 0.0013  | 3.729705 |
| P01024 | 1 | 0.9355 | 761.4182 | 2282.24  | 0.79 | 0.0006  | 7.376333 |
| P01024 | 0 | 0.8493 | 648.0371 | 1942.097 | 4.03 | 0.00261 | 42.1275  |
| P01024 | 0 | 1      | 880.0893 | 2638.253 | 1.21 | 0.00106 | 2.005251 |
| P01024 | 0 | 1      | 880.0894 | 2638.254 | 1.28 | 0.00112 | 2.189461 |
| P01024 | 1 | 0.9333 | 761.4188 | 2282.242 | 1.59 | 0.00121 | 5.802393 |
| P01024 | 0 | 1      | 880.0898 | 2638.255 | 1.83 | 0.00161 | 2.663171 |
| P01024 | 1 | 0.8605 | 761.4194 | 2282.244 | 2.39 | 0.00182 | 3.411147 |
| P01024 | 0 | 1      | 880.0891 | 2638.253 | 1    | 0.00088 | 19.3798  |
| P01024 | 0 | 0.7879 | 504.9399 | 1512.805 | 2.67 | 0.00135 | 3.554398 |
| P01024 | 0 | 1      | 880.089  | 2638.252 | 0.86 | 0.00076 | 2.795041 |
| P01024 | 1 | 0.9388 | 761.4191 | 2282.243 | 1.99 | 0.00151 | 12.38545 |
| P01024 | 0 | 1      | 676.8574 | 1352.707 | 2.49 | 0.00169 | 3.526554 |
| P01024 | 0 | 1      | 880.0894 | 2638.254 | 1.34 | 0.00118 | 1.781836 |
| P01024 | 1 | 0.8302 | 761.4189 | 2282.242 | 1.67 | 0.00127 | 9.75845  |
| P01024 | 1 | 0.8636 | 761.4189 | 2282.242 | 1.67 | 0.00127 | 19.41426 |
| P01024 | 0 | 0.9672 | 649.0171 | 1945.037 | 1.73 | 0.00112 | 2.948561 |
| P01024 | 0 | 0.9906 | 880.0892 | 2638.253 | 1.07 | 0.00094 | 2.259118 |
| P01024 | 1 | 0.8571 | 761.4183 | 2282.24  | 0.95 | 0.00072 | 3.701891 |
| P01024 | 0 | 1      | 1273.161 | 2545.314 | 1.75 | 0.00223 | 0        |
| P01024 | 0 | 0.8727 | 697.8679 | 1394.728 | 2.31 | 0.00161 | 2.820423 |
| P01024 | 0 | 1      | 1026.154 | 3076.447 | 2.02 | 0.00207 | 0        |

|        |   |        |          |          |       |          |          |
|--------|---|--------|----------|----------|-------|----------|----------|
| P01024 | 0 | 1      | 854.4403 | 2561.306 | 0.65  | 0.00055  | 20.43663 |
| P01024 | 0 | 1      | 1152.515 | 2304.023 | 0.85  | 0.00097  | 0        |
| P01024 | 0 | 1      | 768.6802 | 2304.026 | 1.93  | 0.00148  | 20.91209 |
| P01024 | 0 | 0.9481 | 849.1099 | 2545.315 | 2.06  | 0.00175  | 13.00192 |
| P01024 | 0 | 0.8571 | 505.6162 | 1514.834 | 0.26  | 0.00013  | 4.45005  |
| P01024 | 0 | 0.9836 | 757.9207 | 1514.834 | 0.35  | 0.00026  | 3.265729 |
| P01024 | 0 | 0.8833 | 505.6161 | 1514.834 | 0.14  | 0.00007  | 34.00026 |
| P01024 | 0 | 1      | 714.3777 | 1427.748 | 2.23  | 0.00159  | 5.633142 |
| P01024 | 0 | 0.7037 | 697.8673 | 1394.727 | 1.52  | 0.00106  | 4.278603 |
| P01024 | 0 | 0.8679 | 465.5812 | 1394.729 | 2.63  | 0.00122  | 2.14466  |
| P01024 | 0 | 0.8889 | 465.5808 | 1394.728 | 1.84  | 0.00086  | 7.897058 |
| P01024 | 0 | 0.6923 | 697.8668 | 1394.726 | 0.82  | 0.00057  | 3.40301  |
| P01024 | 0 | 1      | 717.8798 | 2868.497 | 2.03  | 0.00146  | 21.74616 |
| P01024 | 0 | 1      | 713.8815 | 2852.504 | 2.57  | 0.00184  | 7.306866 |
| P01024 | 1 | 1      | 1132.541 | 3395.607 | 0.67  | 0.00076  | 2.328988 |
| P01024 | 0 | 0.3544 | 695.3674 | 2084.088 | 2.58  | 0.00179  | 7.613627 |
| P01024 | 0 | 1      | 571.3061 | 2852.501 | 1.63  | 0.00093  | 35.7038  |
| P01024 | 0 | 1      | 951.5057 | 2852.502 | 2.02  | 0.00192  | 4.075742 |
| P01024 | 0 | 1      | 713.8803 | 2852.499 | 0.95  | 0.00068  | 4.116827 |
| P01024 | 0 | 0.6071 | 618.8715 | 1236.736 | 2.95  | 0.00182  | 2.426491 |
| P01024 | 1 | 1      | 421.2294 | 1681.896 | 2.93  | 0.00123  | 9.3031   |
| P01024 | 0 | 1      | 601.2946 | 1801.869 | 1.86  | 0.00112  | 29.28682 |
| P01024 | 0 | 1      | 901.438  | 1801.869 | 1.53  | 0.00138  | 2.430489 |
| P01024 | 2 | 1      | 477.5171 | 1907.047 | 1.59  | 0.00076  | 7.908171 |
| P01024 | 2 | 1      | 477.5171 | 1907.047 | 1.59  | 0.00076  | 7.908171 |
| P01024 | 0 | 0.9038 | 593.9949 | 1779.97  | 1.97  | 0.00117  | 13.00532 |
| P01024 | 2 | 0.0385 | 636.3539 | 1907.047 | 1.82  | 0.00116  | 10.6707  |
| P01024 | 2 |        | 636.3539 | 1907.047 | 1.82  | 0.00116  | 10.6707  |
| P01024 | 0 | 0.8955 | 593.9943 | 1779.968 | 0.95  | 0.00056  | 7.69036  |
| P01024 | 2 | 0.0556 | 477.5169 | 1907.046 | 1.08  | 0.00052  | 2.756554 |
| P01024 | 0 | 1      | 445.748  | 1779.97  | 2.07  | 0.00092  | 39.82608 |
| P01024 | 0 | 1      | 445.7482 | 1779.971 | 2.41  | 0.00107  | 28.93469 |
| P01024 | 2 | 1      | 477.5171 | 1907.047 | 1.59  | 0.00076  | 7.908171 |
| P01024 | 0 | 0.3953 | 438.2444 | 1312.719 | 0.91  | 0.0004   | 13.07735 |
| P01024 | 2 | 0.1017 | 636.3543 | 1907.048 | 2.4   | 0.00153  | 7.948243 |
| P01024 | 2 | 1      | 513.542  | 2051.146 | 0.22  | 0.00012  | 8.315079 |
| P01024 | 0 | 0.8714 | 584.8135 | 1168.62  | 3.89  | 0.00227  | 26.30187 |
| P01024 | 0 | 0.7826 | 614.3361 | 1227.665 | 3.85  | 0.00237  | 4.752878 |
| P01024 | 0 | 0.7674 | 627.8696 | 1254.732 | 2.66  | 0.00167  | 6.644507 |
| P01024 | 0 | 0.6731 | 418.9152 | 1254.731 | 1.97  | 0.00082  | 8.502866 |
| P01024 | 0 | 0.7544 | 627.8685 | 1254.73  | 0.91  | 0.00057  | 3.284029 |
| P01024 | 1 | 1      | 421.2282 | 1681.891 | -0.05 | -0.00002 | 5.48739  |
| P01024 | 0 | 0.551  | 438.2443 | 1312.718 | 0.77  | 0.00034  | 0        |
| P01024 | 0 | 1      | 645.3098 | 1289.612 | 3.35  | 0.00216  | 0        |
| P01024 | 0 | 0.6901 | 656.8638 | 1312.72  | 2.34  | 0.00153  | 20.74958 |
| P01024 | 0 | 0.2833 | 565.8744 | 1130.742 | 2.47  | 0.0014   | 8.799871 |
| P01024 | 0 | 0.1967 | 565.8749 | 1130.743 | 3.44  | 0.00195  | 7.904404 |
| P01024 | 0 | 0.1967 | 565.8751 | 1130.743 | 3.77  | 0.00213  | 7.201677 |
| P01024 | 1 | 1      | 591.0024 | 1770.993 | 5.4   | 0.00319  | 35.79666 |
| P01024 | 0 | 0.2456 | 565.8745 | 1130.742 | 2.69  | 0.00152  | 23.16597 |
| P01024 | 0 | 0.3433 | 565.8745 | 1130.742 | 2.69  | 0.00152  | 33.31018 |
| P01024 | 0 | 0.6912 | 656.8627 | 1312.718 | 0.66  | 0.00043  | 6.39124  |

|        |   |        |          |          |       |          |          |
|--------|---|--------|----------|----------|-------|----------|----------|
| P01024 | 0 | 0.3636 | 565.8747 | 1130.742 | 3.01  | 0.0017   | 19.92287 |
| P01024 | 0 | 0.2222 | 565.8762 | 1130.745 | 5.6   | 0.00317  | 10.83633 |
| P01024 | 0 | 0.5172 | 565.8757 | 1130.744 | 4.74  | 0.00268  | 31.21321 |
| P01024 | 0 | 1      | 713.8805 | 2852.5   | 1.2   | 0.00086  | 4.37348  |
| P01024 | 0 | 1      | 951.5114 | 2852.52  | 7.99  | 0.0076   | 8.863057 |
| P01024 | 0 | 1      | 571.3069 | 2852.505 | 3.02  | 0.00172  | 6.307643 |
| P01024 | 0 | 0.9688 | 880.0892 | 2638.253 | 1.07  | 0.00094  | 0        |
| P01024 | 1 | 0.9524 | 761.4188 | 2282.242 | 1.59  | 0.00121  | 6.822721 |
| P01024 | 1 | 0.92   | 571.3165 | 2282.244 | 2.63  | 0.0015   | 14.75939 |
| P01024 | 1 | 0.9444 | 761.4199 | 2282.245 | 2.95  | 0.00225  | 6.834059 |
| P01024 | 0 | 1      | 880.0909 | 2638.258 | 3.08  | 0.00271  | 1.977817 |
| P01024 | 1 | 0.7273 | 571.3174 | 2282.248 | 4.12  | 0.00235  | 29.9663  |
| P01024 | 0 | 0.6296 | 648.0359 | 1942.093 | 2.23  | 0.00145  | 2.570074 |
| P01024 | 0 | 0.9524 | 700.6989 | 2100.082 | 2.25  | 0.00157  | 7.063157 |
| P01024 | 1 | 1      | 786.103  | 2356.294 | 6.35  | 0.00498  | 25.93839 |
| P01024 | 0 | 1      | 767.7357 | 2301.193 | 2.14  | 0.00164  | 0        |
| P01024 | 0 | 1      | 700.6978 | 2100.079 | 0.68  | 0.00048  | 6.258474 |
| P01024 | 1 | 0.9149 | 691.3665 | 2762.444 | 1.49  | 0.00103  | 9.406418 |
| P01024 | 1 | 1      | 921.4932 | 2762.465 | 8.98  | 0.00827  | 53.4462  |
| P01024 | 0 | 1      | 832.0497 | 2494.135 | -5.38 | -0.00447 | 37.25452 |
| P01024 | 1 | 0.9556 | 691.3676 | 2762.448 | 2.99  | 0.00206  | 7.548436 |
| P01024 | 0 | 1      | 880.0878 | 2638.249 | -0.46 | -0.0004  | 37.87069 |
| P01024 | 1 | 0.7    | 571.3165 | 2282.244 | 2.52  | 0.00144  | 17.90386 |
| P01024 | 1 | 1      | 761.4188 | 2282.242 | 1.59  | 0.00121  | 8.225058 |
| P01024 | 0 | 1      | 1151.099 | 2301.19  | 1.01  | 0.00116  | 0        |
| P01024 | 0 | 1      | 767.7338 | 2301.187 | -0.33 | -0.00025 | 2.216884 |
| P01024 | 0 | 1      | 767.7341 | 2301.188 | 0.07  | 0.00006  | 0        |
| P01024 | 1 | 0.7674 | 571.3159 | 2282.242 | 1.56  | 0.00089  | 43.54082 |
| P01024 | 1 | 0.9733 | 761.4196 | 2282.244 | 2.55  | 0.00194  | 16.02232 |
| P01024 | 0 | 0.9667 | 670.6864 | 2010.045 | 1.68  | 0.00113  | 0        |
| P01024 | 0 | 0.9362 | 723.0656 | 2167.182 | 2.14  | 0.00155  | 30.98116 |
| P01024 | 0 | 0.9296 | 648.0353 | 1942.091 | 1.29  | 0.00084  | 0        |
| P01024 | 0 | 1      | 767.7347 | 2301.189 | 0.79  | 0.00061  | 2.489722 |
| P01024 | 0 | 1      | 1151.099 | 2301.192 | 1.75  | 0.00201  | 2.411083 |
| P01024 | 0 | 1      | 767.7343 | 2301.188 | 0.31  | 0.00024  | 2.613189 |
| P01024 | 0 | 1      | 773.0669 | 2317.186 | 1.53  | 0.00118  | 3.321414 |
| P01024 | 0 | 1      | 773.0666 | 2317.185 | 1.13  | 0.00088  | 7.997076 |
| P01024 | 0 | 0.7167 | 690.9208 | 1380.834 | 0.24  | 0.00017  | 16.69075 |
| P01024 | 0 | 1      | 713.8829 | 2852.51  | 4.54  | 0.00324  | 32.98532 |
| P01024 | 0 | 1      | 951.5057 | 2852.503 | 2.09  | 0.00198  | 5.438453 |
| P01024 | 0 | 1      | 713.8809 | 2852.502 | 1.8   | 0.00129  | 6.980599 |
| P01024 | 0 | 0.6774 | 690.9211 | 1380.835 | 0.6   | 0.00041  | 0.43442  |
| P01024 | 0 | 0.4222 | 690.9227 | 1380.838 | 2.98  | 0.00206  | 19.08362 |
| P01024 | 0 | 0.4375 | 460.95   | 1380.835 | 1.03  | 0.00047  | 10.35044 |
| P01024 | 0 | 0.9388 | 880.0903 | 2638.256 | 2.32  | 0.00204  | 1.309608 |
| P01024 | 0 | 1      | 667.8666 | 1334.726 | 2.62  | 0.00175  | 23.94862 |
| P01024 | 0 | 1      | 595.9641 | 1785.878 | 3.78  | 0.00225  | 15.42492 |
| P01024 | 0 | 1      | 851.9009 | 1702.795 | 1.09  | 0.00093  | 0        |
| P01024 | 0 | 0.9559 | 880.0897 | 2638.254 | 1.62  | 0.00143  | 5.393572 |
| P01024 | 1 | 0.963  | 761.4205 | 2282.247 | 3.83  | 0.00292  | 22.39546 |
| P01024 | 0 | 1      | 893.4394 | 1785.872 | 0.27  | 0.00024  | 3.290036 |
| P01024 | 0 | 1      | 595.9619 | 1785.871 | 0.09  | 0.00005  | 4.768652 |

|        |   |        |          |          |       |          |          |
|--------|---|--------|----------|----------|-------|----------|----------|
| P01024 | 1 | 0.9583 | 761.4193 | 2282.243 | 2.15  | 0.00164  | 7.155581 |
| P01024 | 1 | 0.9545 | 559.9734 | 1677.906 | 2.77  | 0.00155  | 13.46286 |
| P01024 | 0 | 1      | 803.0867 | 2407.246 | 2.02  | 0.00162  | 35.29527 |
| P01024 | 1 | 1      | 559.9726 | 1677.903 | 1.35  | 0.00075  | 2.592273 |
| P01024 | 0 | 0.9286 | 672.719  | 2016.142 | 3.27  | 0.0022   | 14.07725 |
| P01024 | 1 | 1      | 1015.173 | 3043.504 | 3.16  | 0.0032   | 3.560711 |
| P01024 | 1 | 0.8167 | 559.9728 | 1677.904 | 1.78  | 0.001    | 8.383908 |
| P01024 | 0 | 0.9759 | 812.4726 | 1623.938 | 1.89  | 0.00154  | 8.380633 |
| P01024 | 1 | 1      | 761.6304 | 3043.5   | 1.67  | 0.00127  | 6.169547 |
| P01024 | 1 | 1      | 1015.172 | 3043.502 | 2.31  | 0.00235  | 3.614882 |
| P01024 | 1 | 1      | 761.6302 | 3043.499 | 1.43  | 0.00109  | 5.421591 |
| P01024 | 1 | 1      | 1015.172 | 3043.501 | 2.19  | 0.00223  | 3.446305 |
| P01024 | 1 | 0.9315 | 839.4554 | 1677.903 | 1.5   | 0.00126  | 6.330214 |
| P01024 | 0 | 1      | 552.6459 | 1655.923 | -0.28 | -0.00016 | 4.693666 |
| P01024 | 0 | 1      | 828.4653 | 1655.923 | -0.2  | -0.00016 | 2.995376 |
| P01024 | 0 | 0.942  | 552.647  | 1655.927 | 1.71  | 0.00094  | 6.001133 |
| P01024 | 0 | 1      | 964.4166 | 2891.235 | 1.63  | 0.00157  | 3.977208 |
| P01024 | 1 | 1      | 761.6304 | 3043.5   | 1.67  | 0.00127  | 3.098587 |
| P01024 | 0 | 0.9286 | 828.4669 | 1655.926 | 1.64  | 0.00136  | 1.62189  |
| P01024 | 0 | 1      | 723.5653 | 2891.239 | 3.01  | 0.00218  | 1.558357 |
| P01024 | 0 | 1      | 964.4141 | 2891.228 | -0.91 | -0.00087 | 5.327418 |
| P01024 | 0 | 0.7843 | 541.9837 | 1623.937 | 1.06  | 0.00057  | 8.524255 |
| P01024 | 1 | 1      | 761.6303 | 3043.499 | 1.59  | 0.00121  | 5.496209 |
| P01024 | 0 | 1      | 760.1396 | 3037.537 | 5.63  | 0.00428  | 18.62157 |
| P01024 | 0 | 0.9091 | 828.4673 | 1655.927 | 2.16  | 0.00179  | 0        |
| P01024 | 1 | 1      | 1015.172 | 3043.502 | 2.43  | 0.00247  | 2.975655 |
| P01024 | 1 | 0.9167 | 839.4554 | 1677.903 | 1.5   | 0.00126  | 6.012403 |
| P01024 | 1 | 0.8636 | 559.9721 | 1677.902 | 0.47  | 0.00026  | 9.145682 |
| P01024 | 1 | 1      | 761.6303 | 3043.499 | 1.59  | 0.00121  | 4.715016 |
| P01024 | 1 | 1      | 839.4559 | 1677.904 | 2.08  | 0.00175  | 6.738241 |
| P01024 | 1 | 1      | 1015.172 | 3043.501 | 2.01  | 0.00204  | 2.69429  |
| P01024 | 1 | 0.8649 | 559.9725 | 1677.903 | 1.13  | 0.00063  | 8.912168 |
| P01024 | 1 | 0.8611 | 559.9727 | 1677.903 | 1.46  | 0.00081  | 10.37407 |
| P01024 | 1 | 1      | 761.63   | 3043.498 | 1.19  | 0.0009   | 3.646046 |
| P01024 | 0 | 1      | 735.8944 | 1470.782 | 1.15  | 0.00085  | 3.146883 |
| P01024 | 1 | 0.878  | 559.972  | 1677.901 | 0.26  | 0.00014  | 8.496011 |
| P01024 | 1 | 1      | 1015.171 | 3043.5   | 1.71  | 0.00174  | 3.635164 |
| P01024 | 1 | 1      | 761.6304 | 3043.5   | 1.67  | 0.00127  | 3.745147 |
| P01024 | 1 | 1      | 1015.172 | 3043.501 | 2.19  | 0.00223  | 2.810037 |
| P01024 | 1 | 1      | 761.6304 | 3043.5   | 1.67  | 0.00127  | 3.033229 |
| P01024 | 1 | 1      | 559.9721 | 1677.902 | 0.47  | 0.00026  | 0.523854 |
| P01024 | 1 | 0.8594 | 559.9721 | 1677.902 | 0.47  | 0.00026  | 8.91062  |
| P01024 | 1 | 1      | 1015.172 | 3043.501 | 1.95  | 0.00198  | 3.862218 |
| P01024 | 1 | 0.8676 | 559.9721 | 1677.902 | 0.47  | 0.00026  | 10.73318 |
| P01024 | 1 | 1      | 839.4556 | 1677.904 | 1.72  | 0.00144  | 6.822971 |
| P01024 | 1 | 0.9762 | 681.169  | 3401.816 | 2.32  | 0.00158  | 6.227491 |
| P01024 | 0 | 1      | 803.0862 | 2407.244 | 1.34  | 0.00107  | 11.63925 |
| P01024 | 0 | 0.9605 | 602.5671 | 2407.246 | 2.37  | 0.00143  | 1.873599 |
| P01024 | 1 | 0.9762 | 681.169  | 3401.816 | 2.32  | 0.00158  | 6.227491 |
| P01024 | 0 | 0.9815 | 602.567  | 2407.246 | 2.27  | 0.00137  | 1.536593 |
| P01024 | 0 | 0.7647 | 530.2702 | 1588.796 | 2.59  | 0.00137  | 9.449334 |
| P01024 | 0 | 1      | 794.9012 | 1588.795 | 1.98  | 0.00158  | 6.675832 |



|        |   |        |          |          |       |          |          |
|--------|---|--------|----------|----------|-------|----------|----------|
| P01024 | 0 | 0.8043 | 530.2701 | 1588.796 | 2.47  | 0.00131  | 8.618893 |
| P01024 | 0 | 1      | 794.8999 | 1588.793 | 0.37  | 0.00029  | 6.300881 |
| P01024 | 0 | 1      | 803.0841 | 2407.238 | -1.25 | -0.001   | 51.87331 |
| P01024 | 0 | 0.9231 | 648.0375 | 1942.098 | 4.69  | 0.00303  | 22.20974 |
| P01024 | 0 | 1      | 803.0864 | 2407.245 | 1.64  | 0.00132  | 14.36591 |
| P01024 | 0 | 0.8519 | 672.7173 | 2016.137 | 0.73  | 0.00049  | 36.51883 |
| P01024 | 0 | 0.98   | 602.5666 | 2407.245 | 1.56  | 0.00094  | 32.23099 |
| P01024 | 1 | 0.9722 | 709.9887 | 3545.914 | 1.14  | 0.00081  | 24.29012 |
| P01024 | 1 | 0.8936 | 761.4219 | 2282.251 | 5.68  | 0.00432  | 24.39528 |
| P01024 | 0 | 0.9104 | 648.0366 | 1942.095 | 3.27  | 0.00212  | 26.27517 |
| P01024 | 0 | 1      | 681.3621 | 2722.427 | 6.01  | 0.00409  | 2.187102 |
| P01024 | 0 | 1      | 803.0864 | 2407.245 | 1.57  | 0.00126  | 2.662729 |
| P01024 | 0 | 1      | 908.1432 | 2722.415 | 1.73  | 0.00157  | 1.670474 |
| P01024 | 0 | 1      | 803.0863 | 2407.244 | 1.49  | 0.0012   | 11.99712 |
| P01024 | 0 | 1      | 672.7195 | 2016.144 | 4.09  | 0.00275  | 7.898105 |
| P01024 | 1 | 0.9362 | 761.42   | 2282.245 | 3.11  | 0.00237  | 13.20814 |
| P01024 | 1 | 0.8605 | 503.9526 | 1509.843 | 0.9   | 0.00045  | 21.90457 |
| P01024 | 0 | 0.9091 | 717.36   | 1433.713 | 1.81  | 0.0013   | 0        |
| P01024 | 0 | 0.9688 | 648.0371 | 1942.097 | 4.03  | 0.00261  | 12.40545 |
| P01024 | 0 | 1      | 672.718  | 2016.139 | 1.73  | 0.00116  | 7.794504 |
| P01024 | 1 | 1      | 398.9937 | 1592.953 | 3.56  | 0.00142  | 32.30318 |
| P01024 | 1 | 0.6552 | 531.6546 | 1592.949 | 1.12  | 0.00059  | 8.137566 |
| P01024 | 0 | 1      | 624.6841 | 1872.038 | 2.09  | 0.00131  | 43.13214 |
| P01024 | 0 | 0.9783 | 595.9641 | 1785.878 | 3.78  | 0.00225  | 3.09141  |
| P01024 | 1 | 1      | 398.9934 | 1592.952 | 2.57  | 0.00102  | 22.51931 |
| P01024 | 0 | 0.8226 | 648.0361 | 1942.094 | 2.52  | 0.00163  | 29.06031 |
| P01024 | 0 | 0.8889 | 479.6198 | 1436.845 | -0.96 | -0.00046 | 21.67955 |
| P01024 | 0 | 1      | 733.4278 | 2198.269 | 0.62  | 0.00046  | 6.076848 |
| P01024 | 1 | 0.8421 | 761.4195 | 2282.244 | 2.47  | 0.00188  | 4.966627 |
| P01024 | 0 | 0.5417 | 479.6213 | 1436.849 | 2.16  | 0.00103  | 0        |
| P01024 | 0 | 0.7    | 479.621  | 1436.848 | 1.46  | 0.0007   | 9.365727 |
| P01024 | 0 | 1      | 1099.639 | 2198.271 | 1.74  | 0.00191  | 19.44694 |
| P01024 | 1 | 0.9259 | 398.9937 | 1592.953 | 3.49  | 0.00139  | 8.838181 |
| P01024 | 1 | 0.8462 | 531.6558 | 1592.953 | 3.42  | 0.00181  | 8.318171 |
| P01024 | 1 | 0.6333 | 531.6553 | 1592.951 | 2.5   | 0.00133  | 20.203   |
| P01024 | 0 | 0.9787 | 645.3292 | 1933.973 | 3.73  | 0.00241  | 17.64808 |
| P01024 | 0 | 1      | 786.7088 | 2358.112 | 2.27  | 0.00178  | 4.452007 |
| P01024 | 0 | 0.96   | 786.7091 | 2358.113 | 2.66  | 0.00209  | 1.724487 |
| P01024 | 0 | 1      | 908.4822 | 1815.957 | 1.49  | 0.00136  | 20.59525 |
| P01024 | 0 | 1      | 605.9898 | 1815.955 | 0.28  | 0.00017  | 8.500375 |
| P01024 | 0 | 1      | 672.7178 | 2016.139 | 1.45  | 0.00098  | 27.34234 |
| P01024 | 0 | 0.4259 | 819.1858 | 3273.721 | 2.52  | 0.00207  | 14.39419 |
| P01024 | 0 | 0.6667 | 504.79   | 2016.138 | 1.05  | 0.00053  | 0        |
| P01024 | 0 | 1      | 624.6846 | 1872.039 | 2.88  | 0.0018   | 5.494987 |
| P01024 | 0 | 0.9344 | 603.8002 | 1206.593 | 2.13  | 0.00128  | 5.173339 |
| P01024 | 0 | 1      | 672.7168 | 2016.136 | 0     | 0        | 0        |
| P01024 | 0 | 1      | 672.7169 | 2016.136 | 0.18  | 0.00012  | 2.600743 |
| P01024 | 0 | 0.9315 | 624.6843 | 1872.038 | 2.39  | 0.00149  | 0        |
| P01024 | 1 | 1      | 511.9381 | 1533.8   | 0.45  | 0.00023  | 52.28294 |
| P01024 | 1 | 1      | 511.9381 | 1533.8   | 0.45  | 0.00023  | 52.28294 |
| P01024 | 0 | 0.3651 | 1018.51  | 3053.515 | 0.07  | 0.00008  | 64.10399 |
| P01024 | 0 | 0.4359 | 1091.911 | 3273.717 | 1.2   | 0.00131  | 0        |

|        |   |        |          |          |       |          |          |
|--------|---|--------|----------|----------|-------|----------|----------|
| P01024 | 0 | 1      | 672.718  | 2016.14  | 1.82  | 0.00122  | 2.394669 |
| P01024 | 0 | 0.5429 | 648.0356 | 1942.092 | 1.76  | 0.00114  | 0        |
| P01024 | 1 | 0.9474 | 761.4205 | 2282.247 | 3.75  | 0.00286  | 20.58779 |
| P01024 | 0 | 1      | 981.0034 | 1960.999 | 2.58  | 0.00253  | 4.209519 |
| P01024 | 0 | 0.9789 | 654.3379 | 1960.999 | 2.42  | 0.00158  | 4.123317 |
| P01024 | 0 | 1      | 908.952  | 1816.897 | 2.39  | 0.00217  | 5.564895 |
| P01024 | 0 | 0.9419 | 606.3043 | 1816.898 | 3.36  | 0.00203  | 0        |
| P01024 | 0 | 0.9902 | 786.7083 | 2358.11  | 1.57  | 0.00123  | 12.13895 |
| P01024 | 0 | 0.9875 | 786.7087 | 2358.111 | 2.11  | 0.00166  | 4.081446 |
| P01024 | 0 | 0.9342 | 786.7084 | 2358.111 | 1.72  | 0.00135  | 10.20641 |
| P01024 | 0 | 1      | 786.7087 | 2358.112 | 2.19  | 0.00172  | 13.58159 |
| P01024 | 2 | 0.8333 | 513.5431 | 2051.151 | 2.37  | 0.00121  | 8.848928 |
| P01024 | 0 | 0.9881 | 786.7081 | 2358.11  | 1.41  | 0.00111  | 2.713516 |
| P01024 | 0 | 0.8958 | 564.0178 | 1690.039 | -0.23 | -0.00013 | 7.73945  |
| P01024 | 0 | 1      | 786.708  | 2358.109 | 1.26  | 0.00099  | 2.540077 |
| P01024 | 0 | 1      | 786.7079 | 2358.109 | 1.1   | 0.00087  | 11.85513 |
| P01024 | 0 | 1      | 803.088  | 2407.249 | 3.54  | 0.00284  | 22.6765  |
| P01024 | 0 | 1      | 1179.559 | 2358.111 | 2.07  | 0.00244  | 0        |
| P01024 | 0 | 1      | 786.7072 | 2358.107 | 0.25  | 0.0002   | 2.276945 |
| P01024 | 0 | 1      | 738.6737 | 2214.006 | 0.88  | 0.00065  | 15.34129 |
| P01024 | 0 | 1      | 786.7071 | 2358.107 | 0.09  | 0.00007  | 0        |
| P01024 | 0 | 1      | 916.3831 | 2747.135 | 2.27  | 0.00208  | 0        |
| P01024 | 0 | 1      | 786.7083 | 2358.11  | 1.57  | 0.00123  | 2.2667   |
| P01024 | 0 | 1      | 723.5643 | 2891.235 | 1.66  | 0.0012   | 3.960311 |
| P01024 | 0 | 1      | 964.4171 | 2891.237 | 2.2   | 0.00212  | 3.911639 |
| P01024 | 0 | 1      | 786.7084 | 2358.111 | 1.8   | 0.00142  | 2.630527 |
| P01024 | 0 | 1      | 916.3826 | 2747.133 | 1.74  | 0.00159  | 1.890722 |
| P01024 | 0 | 1      | 723.5649 | 2891.238 | 2.51  | 0.00181  | 4.850716 |
| P01024 | 0 | 0.9868 | 1179.559 | 2358.11  | 1.65  | 0.00195  | 0        |
| P01024 | 0 | 1      | 964.4173 | 2891.237 | 2.39  | 0.0023   | 4.045831 |
| P01024 | 0 | 1      | 1179.559 | 2358.11  | 1.55  | 0.00183  | 0.632811 |
| P01024 | 0 | 0.9881 | 786.7078 | 2358.109 | 0.95  | 0.00074  | 2.167222 |
| P01024 | 0 | 1      | 738.6737 | 2214.006 | 0.88  | 0.00065  | 2.17446  |
| P01024 | 0 | 1      | 1179.559 | 2358.11  | 1.65  | 0.00195  | 0        |
| P01024 | 0 | 1      | 786.7075 | 2358.108 | 0.64  | 0.0005   | 2.748203 |
| P01024 | 0 | 1      | 1179.559 | 2358.111 | 1.96  | 0.00231  | 0        |
| P01024 | 0 | 1      | 776.3668 | 1551.726 | 2.19  | 0.0017   | 3.667263 |
| P01024 | 0 | 1      | 1179.559 | 2358.11  | 1.55  | 0.00183  | 0        |
| P01024 | 0 | 1      | 738.6736 | 2214.006 | 0.79  | 0.00059  | 0        |
| P01024 | 0 | 1      | 786.7073 | 2358.107 | 0.4   | 0.00032  | 0        |
| P01024 | 0 | 1      | 786.7073 | 2358.107 | 0.4   | 0.00032  | 10.53674 |
| P01024 | 0 | 1      | 738.6737 | 2214.006 | 0.88  | 0.00065  | 0        |
| P01024 | 0 | 1      | 1179.558 | 2358.11  | 1.34  | 0.00158  | 0.44973  |
| P01024 | 0 | 1      | 1107.506 | 2214.006 | 0.55  | 0.00061  | 0        |
| P01024 | 0 | 1      | 786.7072 | 2358.107 | 0.25  | 0.0002   | 2.515662 |
| P01024 | 0 | 1      | 517.9131 | 1551.725 | 1.12  | 0.00058  | 17.80295 |
| P01024 | 0 | 1      | 738.6741 | 2214.008 | 1.46  | 0.00107  | 0.813458 |
| P01024 | 0 | 1      | 1179.559 | 2358.111 | 1.76  | 0.00207  | 0        |
| P01024 | 0 | 1      | 1107.508 | 2214.008 | 1.76  | 0.00195  | 0        |
| P01024 | 0 | 1      | 786.7075 | 2358.108 | 0.56  | 0.00044  | 2.434725 |
| P01024 | 0 | 1      | 964.4158 | 2891.233 | 0.87  | 0.00083  | 0        |
| P01024 | 0 | 1      | 517.9133 | 1551.725 | 1.59  | 0.00082  | 5.601008 |

|        |   |        |          |          |       |          |          |
|--------|---|--------|----------|----------|-------|----------|----------|
| P01024 | 0 | 0.0556 | 500.9685 | 1500.891 | 2.33  | 0.00117  | 17.86632 |
| P01024 | 0 | 0.8451 | 675.8524 | 1350.697 | 3.61  | 0.00244  | 5.715099 |
| P01024 | 1 | 1      | 561.3035 | 1681.896 | 2.9   | 0.00163  | 11.41621 |
| P01024 | 0 | 0.9535 | 450.9035 | 1350.696 | 2.51  | 0.00113  | 9.107911 |
| P01024 | 0 | 0.9467 | 605.9912 | 1815.959 | 2.5   | 0.00151  | 4.37279  |
| P01024 | 1 | 1      | 421.2293 | 1681.896 | 2.71  | 0.00114  | 46.18562 |
| P01024 | 0 | 1      | 803.083  | 2407.234 | -2.69 | -0.00216 | 5.200674 |
| P01024 | 0 | 0.9762 | 908.4826 | 1815.958 | 1.96  | 0.00178  | 1.333601 |
| P01024 | 1 | 0.9677 | 561.304  | 1681.898 | 3.88  | 0.00218  | 19.84244 |
| P01024 | 0 | 1      | 450.9023 | 1350.692 | -0.06 | -0.00003 | 8.526272 |
| P01024 | 0 | 0.8571 | 675.8502 | 1350.693 | 0.36  | 0.00024  | 5.892132 |
| P01024 | 0 | 1      | 845.5238 | 1690.04  | 0.61  | 0.00051  | 5.861838 |
| P01024 | 1 | 1      | 503.9525 | 1509.843 | 0.66  | 0.00033  | 9.706235 |
| P01024 | 0 | 0.8727 | 692.8614 | 1384.716 | 2.28  | 0.00158  | 3.602351 |
| P01024 | 0 | 1      | 462.2421 | 1384.712 | -0.44 | -0.0002  | 25.17028 |
| P01024 | 0 | 0.9878 | 605.9916 | 1815.96  | 3.3   | 0.002    | 14.41915 |
| P01024 | 0 | 0.9718 | 605.9915 | 1815.96  | 3     | 0.00182  | 3.277436 |
| P01024 | 0 | 0.956  | 605.9907 | 1815.957 | 1.69  | 0.00102  | 5.034089 |
| P01024 | 0 | 0.8    | 564.0195 | 1690.044 | 2.69  | 0.00152  | 13.88159 |
| P01024 | 0 | 0.0541 | 500.9681 | 1500.89  | 1.48  | 0.00074  | 31.71945 |
| P01024 | 0 | 1      | 916.3817 | 2747.13  | 0.74  | 0.00068  | 0        |
| P01024 | 0 | 0.8889 | 523.9392 | 1569.803 | 1.93  | 0.00101  | 11.74787 |
| P01024 | 0 | 0.8873 | 785.4058 | 1569.804 | 2.79  | 0.00219  | 6.450924 |
| P01024 | 0 | 0.9423 | 523.9397 | 1569.805 | 2.98  | 0.00156  | 10.41501 |
| P01024 | 0 | 0.9054 | 793.8826 | 1586.758 | 2.19  | 0.00174  | 7.39928  |
| P01024 | 0 | 1      | 529.5907 | 1586.758 | 1.91  | 0.00101  | 7.958789 |
| P01024 | 0 | 0.908  | 785.4047 | 1569.802 | 1.47  | 0.00115  | 5.638725 |
| P01024 | 0 | 0.9683 | 523.939  | 1569.802 | 1.58  | 0.00083  | 9.620114 |
| P01024 | 0 | 0.9302 | 803.0861 | 2407.244 | 1.19  | 0.00095  | 29.9456  |
| P01024 | 0 | 0.8941 | 785.4053 | 1569.803 | 2.25  | 0.00176  | 6.207455 |
| P01024 | 0 | 0.9831 | 785.4056 | 1569.804 | 2.56  | 0.00201  | 8.044439 |
| P01024 | 0 | 0.7917 | 430.922  | 1290.751 | 0.48  | 0.00021  | 9.421391 |
| P01024 | 0 | 0.85   | 645.8794 | 1290.752 | 0.61  | 0.00039  | 6.023853 |
| P01024 | 0 | 0.9545 | 565.947  | 1695.826 | 0.76  | 0.00043  | 14.45208 |
| P01024 | 0 | 0.975  | 565.949  | 1695.833 | 4.44  | 0.00251  | 6.368908 |
| P01024 | 0 | 1      | 565.9471 | 1695.827 | 1.09  | 0.00062  | 13.99445 |
| P01024 | 0 | 1      | 565.9454 | 1695.822 | -1.93 | -0.00109 | 37.97032 |
| P01024 | 0 | 0.8036 | 523.9392 | 1569.803 | 2.05  | 0.00107  | 12.92473 |
| P01024 | 0 | 0.7442 | 523.9388 | 1569.802 | 1.35  | 0.0007   | 9.152535 |
| P01024 | 0 | 1      | 529.5893 | 1586.753 | -0.74 | -0.00039 | 9.545547 |
| P01024 | 0 | 0.85   | 645.8804 | 1290.753 | 2.12  | 0.00137  | 13.54526 |
| P01024 | 0 | 0.8    | 645.8803 | 1290.753 | 2.03  | 0.00131  | 23.30298 |
| P01024 | 0 | 1      | 880.0892 | 2638.253 | 1.14  | 0.001    | 3.777273 |
| P01024 | 0 | 1      | 803.0862 | 2407.244 | 1.41  | 0.00113  | 18.91265 |
| P01024 | 1 | 1      | 763.3936 | 2288.166 | 1.89  | 0.00144  | 9.494504 |
| P01024 | 1 | 1      | 572.7972 | 2288.167 | 2.23  | 0.00128  | 5.214916 |
| P01024 | 0 | 1      | 803.0863 | 2407.244 | 1.49  | 0.0012   | 17.26485 |
| P01024 | 0 | 1      | 713.3535 | 1425.7   | 1.37  | 0.00098  | 0        |
| P01024 | 0 | 1      | 523.9382 | 1569.8   | 0.06  | 0.00003  | 16.93076 |
| P01024 | 0 | 0.7568 | 523.9393 | 1569.803 | 2.16  | 0.00113  | 12.72792 |
| P01024 | 0 | 0.6486 | 648.0358 | 1942.093 | 2.14  | 0.00139  | 61.4591  |
| P01024 | 0 | 1      | 565.9466 | 1695.825 | 0.12  | 0.00007  | 18.00137 |

|        |   |        |          |          |      |         |          |
|--------|---|--------|----------|----------|------|---------|----------|
| P01024 | 0 | 1      | 723.5641 | 2891.235 | 1.41 | 0.00102 | 3.882621 |
| P01024 | 0 | 1      | 964.4165 | 2891.235 | 1.56 | 0.00151 | 4.002057 |
| P01024 | 0 | 1      | 723.5643 | 2891.235 | 1.66 | 0.0012  | 4.522698 |
| P01024 | 0 | 1      | 964.4165 | 2891.235 | 1.56 | 0.00151 | 4.111323 |
| P01024 | 0 | 0.9545 | 786.7083 | 2358.11  | 1.65 | 0.00129 | 1.802467 |
| P01024 | 0 | 1      | 964.4174 | 2891.238 | 2.51 | 0.00242 | 3.996088 |
| P01024 | 0 | 0.9756 | 786.7078 | 2358.109 | 0.95 | 0.00074 | 9.148158 |
| P01024 | 0 | 0.9667 | 786.7075 | 2358.108 | 0.56 | 0.00044 | 12.89709 |
| P01024 | 0 | 1      | 565.9479 | 1695.829 | 2.38 | 0.00135 | 7.956236 |
| P01024 | 0 | 0.6111 | 722.8492 | 1444.691 | 0.84 | 0.00061 | 0        |
| P01024 | 0 | 0.7746 | 722.8498 | 1444.692 | 1.68 | 0.00122 | 4.950117 |
| P01024 | 0 | 1      | 565.9478 | 1695.829 | 2.28 | 0.00129 | 8.069776 |
| P01024 | 0 | 0.973  | 424.7125 | 1695.828 | 1.91 | 0.00081 | 10.01504 |
| P01024 | 0 | 1      | 529.5915 | 1586.76  | 3.41 | 0.0018  | 59.37828 |
| P01024 | 0 | 1      | 848.4178 | 1695.828 | 1.92 | 0.00163 | 6.612415 |
| P01024 | 0 | 1      | 565.9495 | 1695.834 | 5.19 | 0.00293 | 7.797422 |
| P01024 | 0 | 1      | 803.0863 | 2407.244 | 1.49 | 0.0012  | 5.790777 |
| P01024 | 1 | 1      | 493.9352 | 1479.791 | 1.27 | 0.00062 | 9.327494 |
| P01024 | 0 | 0.8182 | 662.7036 | 1986.096 | 1.7  | 0.00113 | 8.396692 |
| P01024 | 0 | 1      | 523.0395 | 2089.136 | 0.35 | 0.00018 | 33.54731 |
| P01024 | 1 | 1      | 903.5106 | 3611.021 | 2.2  | 0.00199 | 7.571024 |
| P01024 | 1 | 1      | 493.9352 | 1479.791 | 1.2  | 0.00059 | 8.739074 |
| P01024 | 0 | 0.6    | 497.2794 | 1986.096 | 1.36 | 0.00067 | 0        |
| P01024 | 1 | 0.9    | 740.3995 | 1479.792 | 1.69 | 0.00125 | 5.822781 |
| P01024 | 1 | 0.6957 | 493.9352 | 1479.791 | 1.08 | 0.00053 | 7.895748 |
| P01024 | 1 | 0.7143 | 493.935  | 1479.79  | 0.77 | 0.00038 | 8.352705 |
| P01024 | 0 | 1      | 697.0501 | 2089.136 | 0.18 | 0.00012 | 4.121869 |
| P01024 | 0 | 0.9375 | 451.2563 | 1351.754 | 3.67 | 0.00165 | 12.64542 |
| P01024 | 0 | 0.88   | 676.381  | 1351.755 | 3.95 | 0.00267 | 5.984123 |
| P01024 | 1 | 1      | 511.9386 | 1533.801 | 1.58 | 0.00081 | 10.0011  |
| P01024 | 1 | 1      | 511.9386 | 1533.801 | 1.58 | 0.00081 | 10.0011  |
| P01024 | 1 | 0.0192 | 767.4037 | 1533.8   | 0.77 | 0.00059 | 0        |
| P01024 | 1 |        | 767.4037 | 1533.8   | 0.77 | 0.00059 | 0        |
| P01024 | 1 | 0.9775 | 511.9387 | 1533.802 | 1.7  | 0.00087 | 10.11606 |
| P01024 | 0 | 0.8182 | 552.332  | 1103.657 | 2.34 | 0.00129 | 3.80226  |
| P01024 | 0 | 0.8    | 662.7039 | 1986.097 | 2.07 | 0.00137 | 17.05764 |
| P01024 | 0 | 0.5909 | 497.2801 | 1986.098 | 2.77 | 0.00138 | 26.10733 |
| P01024 | 1 | 0.9775 | 511.9387 | 1533.802 | 1.7  | 0.00087 | 10.11606 |
| P01024 | 1 | 0.0508 | 767.4042 | 1533.801 | 1.49 | 0.00114 | 2.393142 |
| P01024 | 1 | 1      | 511.9383 | 1533.8   | 0.92 | 0.00047 | 5.676223 |
| P01024 | 1 | 1      | 511.9383 | 1533.8   | 0.92 | 0.00047 | 5.676223 |
| P01024 | 1 | 0.0189 | 767.4045 | 1533.802 | 1.81 | 0.00139 | 4.351643 |
| P01024 | 1 |        | 767.4045 | 1533.802 | 1.81 | 0.00139 | 4.351643 |
| P01024 | 0 | 0.8889 | 717.3589 | 1433.711 | 0.28 | 0.0002  | 25.6715  |
| P01024 | 0 | 1      | 717.3594 | 1433.711 | 0.96 | 0.00069 | 3.758771 |
| P01024 | 0 | 1      | 523.0405 | 2089.14  | 2.33 | 0.00122 | 2.793945 |
| P01024 | 0 | 0.8511 | 697.0518 | 2089.141 | 2.63 | 0.00183 | 8.278879 |
| P01024 | 0 | 0.9365 | 697.0513 | 2089.139 | 1.93 | 0.00134 | 11.01583 |
| P01024 | 0 | 1      | 604.6191 | 1811.843 | 2.1  | 0.00127 | 26.4688  |
| P01024 | 0 | 1      | 906.4241 | 1811.841 | 1.06 | 0.00096 | 3.07593  |
| P01024 | 0 | 1      | 697.0515 | 2089.14  | 2.19 | 0.00153 | 5.108894 |
| P01024 | 0 | 1      | 523.0397 | 2089.137 | 0.7  | 0.00036 | 7.734283 |

|        |   |        |          |          |       |          |          |
|--------|---|--------|----------|----------|-------|----------|----------|
| P01024 | 1 | 0.9138 | 740.3995 | 1479.792 | 1.69  | 0.00125  | 7.956345 |
| P01024 | 1 | 0.85   | 493.9354 | 1479.792 | 1.64  | 0.00081  | 11.75138 |
| P01024 | 0 | 1      | 1045.073 | 2089.14  | 2.05  | 0.00214  | 0        |
| P01024 | 0 | 0.9184 | 478.5754 | 1433.711 | 0.97  | 0.00047  | 0        |
| P01024 | 0 | 1      | 717.3599 | 1433.713 | 1.73  | 0.00124  | 7.452931 |
| P01024 | 0 | 0.9464 | 478.5754 | 1433.712 | 1.16  | 0.00056  | 5.117208 |
| P01024 | 1 | 1      | 511.9386 | 1533.801 | 1.58  | 0.00081  | 18.14629 |
| P01024 | 1 | 0.9302 | 591.0009 | 1770.988 | 2.82  | 0.00166  | 7.884392 |
| P01024 | 0 | 1      | 908.4843 | 1815.961 | 3.78  | 0.00343  | 11.60523 |
| P01024 | 0 | 1      | 1253.224 | 2505.441 | 2.17  | 0.00272  | 1.435377 |
| P01024 | 0 | 1      | 834.3733 | 1667.739 | 1.38  | 0.00115  | 2.135336 |
| P01024 | 0 | 1      | 714.978  | 3570.861 | 2.87  | 0.00205  | 7.213333 |
| P01024 | 1 | 1      | 761.4207 | 2282.248 | 4.08  | 0.0031   | 16.4874  |
| P01024 | 1 | 1      | 590.9993 | 1770.983 | 0.13  | 0.00008  | 5.098004 |
| P01024 | 0 | 1      | 803.0869 | 2407.246 | 2.18  | 0.00175  | 0        |
| P01024 | 0 | 1      | 1190.957 | 3570.856 | 1.6   | 0.0019   | 3.82868  |
| P01024 | 0 | 0.9794 | 835.818  | 2505.439 | 1.66  | 0.00138  | 4.077807 |
| P01024 | 0 | 1      | 893.4719 | 3570.866 | 4.31  | 0.00385  | 1.44973  |
| P01024 | 0 | 0.9189 | 404.7183 | 1615.851 | 3.22  | 0.0013   | 0        |
| P01024 | 1 | 1      | 591.0018 | 1770.991 | 4.37  | 0.00258  | 0        |
| P01024 | 1 | 0.9608 | 591.0002 | 1770.986 | 1.78  | 0.00105  | 44.57871 |
| P01024 | 1 | 1      | 591.0009 | 1770.988 | 2.82  | 0.00166  | 3.603768 |
| P01024 | 1 | 1      | 591.0011 | 1770.989 | 3.23  | 0.00191  | 11.03367 |
| P01024 | 1 | 1      | 594.017  | 1780.036 | 0.22  | 0.00013  | 100      |
| P01024 | 1 | 1      | 591.0014 | 1770.99  | 3.75  | 0.00221  | 6.844754 |
| P01024 | 0 | 0.8776 | 627.1162 | 2505.443 | 2.99  | 0.00187  | 7.642929 |
| P01024 | 1 | 0.8214 | 586.8345 | 2344.316 | 4.85  | 0.00284  | 15.3471  |
| P01024 | 0 | 1      | 717.3601 | 1433.713 | 1.98  | 0.00142  | 3.097755 |
| P01024 | 0 | 0.6596 | 552.332  | 1103.657 | 2.34  | 0.00129  | 12.32221 |
| P01024 | 0 | 1      | 647.8582 | 2588.411 | 0.7   | 0.00045  | 15.99419 |
| P01024 | 0 | 1      | 649.0156 | 1945.032 | -0.53 | -0.00034 | 22.79784 |
| P01024 | 0 | 1      | 863.4756 | 2588.412 | 1.15  | 0.001    | 2.189114 |
| P01024 | 0 | 1      | 478.5763 | 1433.714 | 2.95  | 0.00141  | 2.969398 |
| P01024 | 0 | 0.7213 | 552.3322 | 1103.657 | 2.67  | 0.00147  | 2.507487 |
| P01024 | 1 | 1      | 511.9386 | 1533.801 | 1.58  | 0.00081  | 18.14629 |
| P01024 | 0 | 0.7222 | 552.3317 | 1103.656 | 1.89  | 0.00105  | 3.611325 |
| P01024 | 0 | 0.9091 | 649.0176 | 1945.038 | 2.49  | 0.00161  | 13.73777 |
| P01024 | 0 | 0.7963 | 552.3319 | 1103.656 | 2.12  | 0.00117  | 5.563288 |
| P01024 | 0 | 0.8649 | 533.306  | 2130.202 | 3.44  | 0.00183  | 22.98233 |
| P01024 | 0 | 1      | 697.0519 | 2089.141 | 2.81  | 0.00195  | 17.67736 |
| P01024 | 0 | 1      | 523.04   | 2089.138 | 1.4   | 0.00073  | 20.161   |
| P01024 | 0 | 0.2826 | 580.3702 | 1159.733 | 3.63  | 0.0021   | 11.92777 |
| P01024 | 0 | 1      | 1019.58  | 2038.153 | 1.88  | 0.00192  | 0        |
| P01024 | 0 | 0.9524 | 680.0558 | 2038.153 | 1.54  | 0.00105  | 5.07559  |
| P01024 | 0 | 0.7416 | 872.7719 | 2616.301 | 1.97  | 0.00172  | 3.75364  |
| P01024 | 0 | 1      | 631.3056 | 1261.604 | 1.62  | 0.00102  | 0        |
| P01024 | 0 | 1      | 1039.54  | 2078.073 | 2.65  | 0.00275  | 6.867674 |
| P01024 | 0 | 0.8906 | 555.8184 | 1110.63  | 2.68  | 0.00149  | 29.48924 |
| P01024 | 0 | 0.5385 | 479.6216 | 1436.85  | 2.67  | 0.00128  | 69.31403 |
| P01024 | 0 | 1      | 644.6965 | 1932.075 | 2.04  | 0.00131  | 1.960783 |
| P01024 | 0 | 0.8358 | 648.0357 | 1942.093 | 1.95  | 0.00126  | 32.6348  |
| P01024 | 0 | 0.9398 | 748.9081 | 1496.809 | 1.84  | 0.00138  | 6.352702 |

|        |   |        |          |          |       |          |          |
|--------|---|--------|----------|----------|-------|----------|----------|
| P01024 | 0 | 0.7143 | 479.6211 | 1436.849 | 1.65  | 0.00079  | 16.92912 |
| P01024 | 0 | 1      | 565.9473 | 1695.827 | 1.41  | 0.0008   | 37.40307 |
| P01024 | 0 | 1      | 604.6191 | 1811.843 | 2     | 0.00121  | 9.552627 |
| P01024 | 0 | 1      | 693.3632 | 2078.075 | 3.53  | 0.00244  | 11.78732 |
| P01024 | 0 | 1      | 1013.18  | 3037.524 | 1.56  | 0.00158  | 3.17395  |
| P01024 | 0 | 0.94   | 520.2738 | 2078.073 | 2.7   | 0.0014   | 8.665817 |
| P01024 | 0 | 1      | 786.7077 | 2358.109 | 0.87  | 0.00068  | 2.414361 |
| P01024 | 0 | 1      | 738.6743 | 2214.008 | 1.79  | 0.00132  | 0        |
| P01024 | 0 | 1      | 549.0034 | 1644.996 | 3.7   | 0.00203  | 12.73141 |
| P01024 | 0 | 0.9701 | 1179.559 | 2358.112 | 2.17  | 0.00256  | 1.179302 |
| P01024 | 0 | 1      | 692.7307 | 2076.177 | 2.04  | 0.00141  | 6.744061 |
| P01024 | 0 | 1      | 1179.558 | 2358.109 | 1.24  | 0.00146  | 0        |
| P01024 | 0 | 1      | 786.7083 | 2358.11  | 1.65  | 0.00129  | 2.17309  |
| P01024 | 0 | 1      | 1107.507 | 2214.007 | 1.1   | 0.00122  | 0        |
| P01024 | 0 | 1      | 786.707  | 2358.106 | -0.06 | -0.00005 | 10.78449 |
| P01024 | 0 | 0.9875 | 786.7071 | 2358.107 | 0.09  | 0.00007  | 2.401644 |
| P01024 | 0 | 0.9818 | 738.6736 | 2214.006 | 0.79  | 0.00059  | 0        |
| P01024 | 0 | 0.907  | 1179.558 | 2358.108 | 0.62  | 0.00073  | 7.491054 |
| P01024 | 0 | 1      | 786.7083 | 2358.11  | 1.57  | 0.00123  | 1.757187 |
| P01024 | 0 | 0.9516 | 786.7087 | 2358.112 | 2.19  | 0.00172  | 2.697949 |
| P01024 | 0 | 0.9512 | 786.7091 | 2358.113 | 2.66  | 0.00209  | 0        |
| P01024 | 0 | 1      | 1179.558 | 2358.109 | 1.24  | 0.00146  | 0        |
| P01024 | 0 | 1      | 1179.559 | 2358.111 | 2.07  | 0.00244  | 0        |
| P01024 | 0 | 1      | 786.7083 | 2358.11  | 1.57  | 0.00123  | 2.31205  |
| P01024 | 0 | 0.9403 | 648.0364 | 1942.095 | 3.08  | 0.002    | 11.95694 |
| P01024 | 0 | 1      | 760.1368 | 3037.526 | 2.01  | 0.00153  | 2.866978 |
| P01024 | 0 | 1      | 1179.559 | 2358.11  | 1.55  | 0.00183  | 0        |
| P01024 | 0 | 1      | 676.8575 | 1352.708 | 2.77  | 0.00187  | 8.078828 |
| P01024 | 0 | 1      | 786.7084 | 2358.111 | 1.72  | 0.00135  | 12.62063 |
| P01024 | 0 | 1      | 786.7081 | 2358.11  | 1.34  | 0.00105  | 2.66931  |
| P01024 | 0 | 1      | 412.0035 | 1644.992 | 1.43  | 0.00059  | 11.60258 |
| P01024 | 0 | 1      | 738.6763 | 2214.014 | 4.43  | 0.00327  | 0        |
| P01024 | 0 | 1      | 786.7083 | 2358.11  | 1.57  | 0.00123  | 2.493541 |
| P01024 | 0 | 0.9832 | 1179.559 | 2358.111 | 1.96  | 0.00231  | 0        |
| P01024 | 0 | 0.9804 | 786.7082 | 2358.11  | 1.49  | 0.00117  | 12.65049 |
| P01024 | 0 | 1      | 1107.507 | 2214.007 | 1.32  | 0.00147  | 0        |
| P01024 | 0 | 1      | 786.7073 | 2358.107 | 0.4   | 0.00032  | 0        |
| P01024 | 0 | 1      | 549.0028 | 1644.994 | 2.58  | 0.00142  | 12.55894 |
| P01024 | 1 | 0.9231 | 761.4193 | 2282.243 | 2.15  | 0.00164  | 5.187278 |
| P01024 | 0 | 1      | 693.3612 | 2078.069 | 0.53  | 0.00037  | 100      |
| P01024 | 0 | 1      | 786.7083 | 2358.11  | 1.65  | 0.00129  | 2.381968 |
| P01024 | 0 | 1      | 644.6955 | 1932.072 | 0.43  | 0.00027  | 7.762418 |
| P01024 | 0 | 1      | 786.708  | 2358.109 | 1.26  | 0.00099  | 4.247067 |
| P01024 | 0 | 0.9828 | 786.7084 | 2358.111 | 1.8   | 0.00142  | 0        |
| P01024 | 0 | 1      | 519.7998 | 2076.177 | 2.03  | 0.00105  | 4.927312 |
| P01024 | 0 | 0.95   | 648.0366 | 1942.095 | 3.27  | 0.00212  | 51.28757 |
| P01024 | 0 | 1      | 692.7293 | 2076.173 | 0.1   | 0.00007  | 4.260423 |
| P01024 | 0 | 1      | 693.3629 | 2078.074 | 3     | 0.00208  | 0        |
| P01024 | 0 | 1      | 908.4837 | 1815.96  | 3.17  | 0.00288  | 6.799383 |
| P01024 | 0 | 0.7963 | 648.0359 | 1942.093 | 2.23  | 0.00145  | 0        |
| P01024 | 0 | 1      | 1107.508 | 2214.008 | 1.54  | 0.00171  | 0        |
| P01024 | 0 | 1      | 786.7076 | 2358.108 | 0.79  | 0.00062  | 2.086887 |

|        |   |        |          |          |      |         |          |
|--------|---|--------|----------|----------|------|---------|----------|
| P01024 | 0 | 0.9787 | 738.6735 | 2214.006 | 0.63 | 0.00046 | 0        |
| P01024 | 0 | 0.9912 | 1179.558 | 2358.108 | 0.62 | 0.00073 | 0        |
| P01024 | 0 | 1      | 1107.507 | 2214.007 | 1.1  | 0.00122 | 1.135485 |
| P01024 | 0 | 1      | 549.0018 | 1644.991 | 0.69 | 0.00038 | 55.38434 |
| P01024 | 0 | 0.9905 | 786.7073 | 2358.107 | 0.4  | 0.00032 | 11.98888 |
| P01024 | 0 | 1      | 693.3613 | 2078.069 | 0.79 | 0.00055 | 7.245576 |
| P01024 | 0 | 1      | 1179.558 | 2358.109 | 1.13 | 0.00134 | 0        |
| P01024 | 0 | 1      | 786.7079 | 2358.109 | 1.1  | 0.00087 | 2.193598 |
| P01024 | 0 | 1      | 786.708  | 2358.109 | 1.26 | 0.00099 | 0        |
| P01024 | 0 | 0.9412 | 1179.559 | 2358.11  | 1.55 | 0.00183 | 0        |
| P01024 | 0 | 1      | 786.7089 | 2358.112 | 2.34 | 0.00184 | 3.404822 |
| P01024 | 0 | 0.6889 | 648.0358 | 1942.093 | 2.14 | 0.00139 | 10.80001 |
| P01024 | 0 | 1      | 710.7368 | 2130.196 | 0.43 | 0.00031 | 6.630315 |
| P01024 | 0 | 1      | 906.4243 | 1811.841 | 1.27 | 0.00115 | 3.480999 |
| P01024 | 0 | 0.9592 | 533.3053 | 2130.199 | 2.06 | 0.0011  | 4.179342 |
| P01024 | 0 | 0.7    | 479.6211 | 1436.849 | 1.71 | 0.00082 | 9.988125 |
| P01024 | 0 | 0.931  | 710.7381 | 2130.2   | 2.24 | 0.00159 | 20.30905 |
| P01024 | 0 | 0.8125 | 533.3049 | 2130.198 | 1.37 | 0.00073 | 3.872327 |
| P01024 | 0 | 1      | 756.4155 | 1511.824 | 1.32 | 0.001   | 0        |
| P01024 | 1 | 0.8039 | 761.419  | 2282.242 | 1.83 | 0.00139 | 4.587765 |
| P01024 | 0 | 1      | 703.3564 | 1405.705 | 1.1  | 0.00077 | 2.935766 |
| P01024 | 0 | 0.9268 | 469.2397 | 1405.704 | 0.33 | 0.00015 | 5.110014 |
| P01024 | 0 | 0.9552 | 703.3562 | 1405.705 | 0.84 | 0.00059 | 3.24194  |
| P01024 | 0 | 0.9778 | 710.7373 | 2130.197 | 1.12 | 0.0008  | 41.96458 |
| P01024 | 0 | 0.6071 | 533.3054 | 2130.2   | 2.18 | 0.00116 | 8.330234 |
| P01024 | 0 | 0.939  | 469.2402 | 1405.706 | 1.5  | 0.0007  | 8.418099 |
| P01024 | 0 | 0.8986 | 469.2401 | 1405.706 | 1.24 | 0.00058 | 11.80439 |
| P01024 | 0 | 0.9848 | 756.4179 | 1511.828 | 4.47 | 0.00338 | 0        |
| P01024 | 0 | 1      | 505.6265 | 1514.865 | 3.06 | 0.00155 | 31.84282 |
| P01024 | 1 | 0.9474 | 761.4187 | 2282.242 | 1.43 | 0.00109 | 6.781034 |
| P01024 | 0 | 1      | 697.0507 | 2089.137 | 0.97 | 0.00067 | 41.91027 |
| P01024 | 0 | 0.7143 | 479.621  | 1436.849 | 1.52 | 0.00073 | 9.121378 |
| P01024 | 0 | 0.9839 | 604.6186 | 1811.841 | 1.19 | 0.00072 | 4.647392 |
| P01024 | 0 | 0.6977 | 648.0353 | 1942.091 | 1.39 | 0.0009  | 3.402536 |
| P01024 | 0 | 1      | 989.8251 | 2967.461 | 0.59 | 0.00058 | 24.44282 |
| P01024 | 0 | 0.675  | 479.6217 | 1436.85  | 2.86 | 0.00137 | 14.99168 |
| P01024 | 0 | 1      | 693.3626 | 2078.073 | 2.56 | 0.00177 | 8.533365 |
| P01024 | 0 | 1      | 604.6196 | 1811.844 | 2.91 | 0.00176 | 4.846468 |
| P01024 | 0 | 0.8537 | 648.036  | 1942.093 | 2.33 | 0.00151 | 14.80847 |
| P01024 | 0 | 1      | 906.4246 | 1811.842 | 1.6  | 0.00145 | 3.176332 |
| P01024 | 1 | 1      | 545.9832 | 1635.935 | 0.62 | 0.00034 | 6.662004 |
| P01024 | 0 | 0.7692 | 718.9288 | 1436.85  | 2.72 | 0.00195 | 10.50089 |
| P01024 | 0 | 0.9    | 604.6193 | 1811.843 | 2.3  | 0.00139 | 1.624027 |
| P01024 | 0 | 0.8684 | 880.0891 | 2638.253 | 1    | 0.00088 | 5.065908 |
| P01024 | 0 | 1      | 450.9034 | 1350.696 | 2.24 | 0.00101 | 12.3407  |
| P01024 | 1 | 1      | 438.9665 | 1314.885 | 1.23 | 0.00054 | 9.635981 |
| P01024 | 0 | 1      | 692.7321 | 2076.182 | 4.07 | 0.00281 | 7.86514  |
| P01024 | 0 | 0.9756 | 644.697  | 1932.076 | 2.7  | 0.00174 | 25.59362 |
| P01024 | 0 | 1      | 601.2949 | 1801.87  | 2.27 | 0.00136 | 24.68689 |
| P01024 | 0 | 0.3721 | 580.3699 | 1159.733 | 3.21 | 0.00186 | 10.01686 |
| P01024 | 0 | 0.9512 | 504.9394 | 1512.804 | 1.64 | 0.00083 | 11.66531 |
| P01024 | 0 | 0.973  | 539.2869 | 1615.846 | 0.06 | 0.00003 | 0        |

|        |   |        |          |          |       |          |          |
|--------|---|--------|----------|----------|-------|----------|----------|
| P01024 | 1 | 0.9032 | 571.3172 | 2282.247 | 3.8   | 0.00217  | 19.10826 |
| P01024 | 1 | 1      | 605.3342 | 1813.988 | 2.06  | 0.00124  | 9.836341 |
| P01024 | 0 | 0.7213 | 565.8727 | 1130.738 | -0.44 | -0.00025 | 5.664781 |
| P01024 | 0 | 0.8462 | 523.0407 | 2089.141 | 2.68  | 0.0014   | 0        |
| P01024 | 0 | 0.7818 | 547.3486 | 1093.69  | 3.59  | 0.00196  | 34.84159 |
| P01024 | 0 | 0.8974 | 622.3387 | 2486.333 | -0.46 | -0.00028 | 6.755883 |
| P01024 | 0 | 0.6316 | 452.59   | 1355.755 | 0.18  | 0.00008  | 59.01131 |
| P01024 | 0 | 1      | 885.4464 | 3538.764 | 0.69  | 0.00061  | 0        |
| P01024 | 1 | 0.5    | 464.6212 | 1391.849 | 1.52  | 0.00071  | 21.85379 |
| P01024 | 0 | 1      | 738.6733 | 2214.005 | 0.46  | 0.00034  | 5.27091  |
| P01024 | 0 | 0.9286 | 404.7161 | 1615.843 | -2.14 | -0.00087 | 67.11542 |
| P01024 | 0 | 0.7027 | 648.0366 | 1942.095 | 3.37  | 0.00218  | 14.99859 |
| P01024 | 0 | 0.7273 | 409.8924 | 1227.663 | 2.03  | 0.00083  | 0        |
| P01024 | 0 | 0.9375 | 600.6632 | 1799.975 | 3.18  | 0.00191  | 46.48963 |
| P01024 | 0 | 1      | 549.0018 | 1644.991 | 0.69  | 0.00038  | 0        |
| P01024 | 1 | 1      | 421.2282 | 1681.891 | 0.1   | 0.00004  | 12.58134 |
| P01024 | 0 | 0.6296 | 583.8662 | 1166.725 | 3.6   | 0.0021   | 31.76363 |
| P01024 | 0 | 0.9375 | 523.9383 | 1569.8   | 0.3   | 0.00015  | 0        |
| P01024 | 0 | 0.8718 | 552.6473 | 1655.927 | 2.15  | 0.00119  | 25.54733 |
| P01024 | 0 | 0.6222 | 722.8503 | 1444.693 | 2.36  | 0.0017   | 9.415826 |
| P01024 | 1 | 1      | 493.9346 | 1479.789 | 0.03  | 0.00001  | 8.371916 |
| P01024 | 0 | 0.9643 | 404.7177 | 1615.849 | 1.79  | 0.00072  | 52.982   |
| P01024 | 0 | 0.7609 | 409.8924 | 1227.663 | 1.88  | 0.00077  | 6.827866 |
| P01024 | 0 | 0.6857 | 648.0349 | 1942.09  | 0.73  | 0.00047  | 31.79472 |
| P01024 | 0 | 0.7347 | 587.8698 | 1174.732 | 3.14  | 0.00184  | 32.21711 |
| P01024 | 0 | 1      | 786.7064 | 2358.105 | -0.76 | -0.0006  | 12.56548 |
| P01024 | 0 | 1      | 685.871  | 1370.735 | 2.44  | 0.00167  | 0        |
| P01024 | 0 | 0.7727 | 710.7374 | 2130.198 | 1.21  | 0.00086  | 19.86711 |
| P01024 | 0 | 0.95   | 601.2952 | 1801.871 | 2.78  | 0.00167  | 0        |
| P01024 | 1 | 1      | 470.6114 | 1409.82  | 1.36  | 0.00064  | 52.75338 |
| P01024 | 0 | 0.9516 | 603.7999 | 1206.592 | 1.62  | 0.00098  | 0        |
| P01024 | 2 | 1      | 511.5511 | 2043.183 | 1.21  | 0.00062  | 16.72536 |
| P01024 | 0 | 0.6727 | 614.3343 | 1227.661 | 0.87  | 0.00054  | 3.231944 |
| P01024 | 2 | 0.7895 | 397.7635 | 1588.032 | 3.3   | 0.00131  | 32.61517 |
| P01024 | 0 | 0.2609 | 580.3684 | 1159.73  | 0.58  | 0.00033  | 15.04164 |
| P01024 | 0 | 0.46   | 377.5851 | 1130.741 | 1.76  | 0.00066  | 8.214984 |
| P01024 | 0 | 0.9706 | 539.2885 | 1615.851 | 2.89  | 0.00156  | 5.965941 |
| P01024 | 0 | 1      | 602.5659 | 2407.242 | 0.45  | 0.00027  | 69.37263 |
| P01024 | 0 | 1      | 552.6475 | 1655.928 | 2.59  | 0.00143  | 2.689092 |
| P01024 | 2 | 0.913  | 513.5429 | 2051.15  | 2.01  | 0.00103  | 38.46426 |
| P01024 | 1 | 0.75   | 571.316  | 2282.242 | 1.77  | 0.00101  | 17.36365 |
| P01024 | 0 | 0.8286 | 648.0356 | 1942.092 | 1.86  | 0.0012   | 25.22486 |
| P01024 | 1 | 1      | 421.2298 | 1681.897 | 3.8   | 0.0016   | 12.73531 |
| P01024 | 0 | 1      | 670.6868 | 2010.046 | 2.23  | 0.00149  | 5.594165 |
| P01024 | 0 | 1      | 595.9638 | 1785.877 | 3.17  | 0.00188  | 74.90744 |
| P01024 | 0 | 1      | 667.8663 | 1334.725 | 2.07  | 0.00138  | 15.26435 |
| P01024 | 0 | 1      | 605.9918 | 1815.961 | 3.6   | 0.00218  | 19.28808 |
| P01024 | 0 | 1      | 697.0502 | 2089.136 | 0.26  | 0.00018  | 73.80787 |
| P01024 | 0 | 0.4595 | 648.0366 | 1942.095 | 3.27  | 0.00212  | 0        |
| P01024 | 0 | 0.7778 | 519.7997 | 2076.177 | 1.8   | 0.00093  | 19.37876 |
| P01024 | 0 | 1      | 786.7055 | 2358.102 | -1.93 | -0.00151 | 27.17006 |
| P01024 | 1 | 0.8889 | 571.3151 | 2282.239 | 0.16  | 0.00009  | 40.56333 |



|            |   |        |          |          |       |          |          |
|------------|---|--------|----------|----------|-------|----------|----------|
| P01024     | 0 | 0.2941 | 460.9499 | 1380.835 | 0.76  | 0.00035  | 13.82021 |
| P01024     | 1 | 1      | 761.4188 | 2282.242 | 1.51  | 0.00115  | 42.94876 |
| P01024     | 0 | 0.5405 | 438.2447 | 1312.72  | 1.74  | 0.00076  | 44.26881 |
| P01024     | 0 | 0.7419 | 880.0883 | 2638.25  | 0.1   | 0.00008  | 4.718264 |
| P01024     | 0 | 0.9667 | 693.3631 | 2078.075 | 3.35  | 0.00232  | 32.59631 |
| P01024     | 1 | 0.9583 | 1015.172 | 3043.501 | 1.95  | 0.00198  | 3.932519 |
| P01024     | 0 | 1      | 906.4251 | 1811.843 | 2.08  | 0.00188  | 0        |
| P01024     | 1 | 0.7647 | 531.6553 | 1592.951 | 2.38  | 0.00127  | 11.42001 |
| P01024     | 0 | 0.5312 | 648.0356 | 1942.092 | 1.76  | 0.00114  | 46.21769 |
| P01024     | 0 | 0.7857 | 829.4521 | 2486.342 | 3.08  | 0.00256  | 0        |
| P01024     | 0 | 0.931  | 450.903  | 1350.694 | 1.29  | 0.00058  | 26.43    |
| P01024     | 1 | 1      | 445.7653 | 1780.039 | 1.9   | 0.00084  | 35.36129 |
| P01024     | 0 | 1      | 803.086  | 2407.243 | 1.11  | 0.00089  | 0        |
| P01024     | 0 | 0.725  | 499.608  | 1496.809 | 2.16  | 0.00108  | 9.003232 |
| P01024     | 0 | 0.9545 | 885.4476 | 3538.769 | 2.07  | 0.00183  | 4.642412 |
| P01024     | 0 | 0.9375 | 889.4466 | 3554.765 | 2.32  | 0.00206  | 7.138779 |
| P01024; OS | 0 | 0.64   | 532.3343 | 1063.661 | 1.11  | 0.00059  | 0        |
| P01024     | 0 | 1      | 595.8157 | 1190.624 | 3.16  | 0.00188  | 0        |
| P01024     | 0 | 0.7321 | 587.8703 | 1174.733 | 4.08  | 0.00239  | 5.006826 |
| P01024     | 0 | 0.3061 | 618.8714 | 1236.736 | 2.85  | 0.00176  | 0        |
| P01024     | 0 | 0.9512 | 523.9369 | 1569.796 | -2.39 | -0.00125 | 20.28429 |
| P01024     | 0 | 0.6757 | 599.3275 | 1795.968 | 3.63  | 0.00218  | 9.194969 |
| P01024     | 0 | 0.9474 | 538.9665 | 1614.885 | 1.86  | 0.001    | 0        |
| P01024     | 0 | 0.8276 | 786.7083 | 2358.11  | 1.65  | 0.00129  | 10.04483 |
| P01024     | 1 | 1      | 493.9359 | 1479.793 | 2.57  | 0.00127  | 50.85025 |
| P01024     | 1 | 0.88   | 571.3156 | 2282.241 | 1.02  | 0.00058  | 3.871119 |
| P01024     | 0 | 0.7843 | 587.8693 | 1174.731 | 2.31  | 0.00136  | 19.15297 |
| P01024     | 0 | 0.7561 | 418.915  | 1254.73  | 1.31  | 0.00055  | 25.02604 |
| P01024     | 0 | 0.9412 | 807.9462 | 1614.885 | 2.02  | 0.00163  | 4.310209 |
| P01024     | 0 | 0.8667 | 880.0895 | 2638.254 | 1.48  | 0.0013   | 11.69024 |
| P01024     | 0 | 0.8857 | 545.3077 | 1633.909 | 2.9   | 0.00158  | 4.725809 |
| P01024     | 0 | 1      | 711.7586 | 3554.764 | 2.15  | 0.00153  | 6.804381 |
| P01024     | 0 | 0.9512 | 451.2561 | 1351.754 | 3.33  | 0.0015   | 4.115806 |
| P01024     | 0 | 0.6111 | 700.6988 | 2100.082 | 2.16  | 0.00151  | 4.487957 |
| P01024     | 1 | 1      | 444.2823 | 1330.832 | 2     | 0.00089  | 10.5811  |
| P01024     | 0 | 0.9259 | 786.7091 | 2358.113 | 2.66  | 0.00209  | 12.55509 |
| P01024     | 0 | 0.7391 | 404.7174 | 1615.848 | 1.11  | 0.00045  | 10.01746 |
| P01024     | 0 | 0.8261 | 697.0527 | 2089.144 | 3.95  | 0.00275  | 0        |
| P01024     | 0 | 0.5122 | 460.9497 | 1380.835 | 0.37  | 0.00017  | 4.090551 |
| P01024     | 1 | 1      | 542.9669 | 1626.886 | 3.11  | 0.00169  | 42.1939  |
| P01024     | 0 | 0.7727 | 552.3318 | 1103.656 | 2.01  | 0.00111  | 0        |
| P01024     | 0 | 0.8    | 452.5906 | 1355.757 | 1.6   | 0.00072  | 3.779116 |
| P01024     | 1 | 0.6875 | 493.9352 | 1479.791 | 1.27  | 0.00062  | 15.88511 |
| P01024     | 1 | 0.2857 | 480.9438 | 1440.817 | 3.2   | 0.00154  | 18.81922 |
| P01024     | 0 | 0.619  | 501.7972 | 1002.587 | 1.8   | 0.0009   | 3.435703 |
| P01024     | 0 | 0.6667 | 648.0366 | 1942.095 | 3.27  | 0.00212  | 38.26043 |
| P01024     | 1 | 0.4444 | 513.2687 | 1537.792 | 1.79  | 0.00092  | 7.464835 |
| P01024     | 1 | 0.7619 | 841.4518 | 1681.896 | 3.16  | 0.00266  | 0        |
| P01024     | 0 | 0.8065 | 880.0885 | 2638.251 | 0.3   | 0.00027  | 2.900106 |
| P01024     | 0 | 0.8889 | 648.6973 | 1944.077 | 3.1   | 0.00201  | 6.263824 |
| P01024     | 0 | 0.9429 | 757.922  | 1514.837 | 2.12  | 0.00161  | 3.076235 |
| P01024     | 1 | 1      | 493.9353 | 1479.791 | 1.33  | 0.00066  | 14.62449 |

|            |   |        |          |          |       |          |          |
|------------|---|--------|----------|----------|-------|----------|----------|
| P01024     | 0 | 0.4688 | 382.9013 | 1146.689 | 1.85  | 0.00071  | 8.958314 |
| P01024     | 0 | 0.7    | 392.2488 | 1174.732 | 2.69  | 0.00105  | 12.31742 |
| P01024     | 0 | 0.8077 | 693.3602 | 2078.066 | -0.79 | -0.00055 | 0        |
| P01024     | 0 | 0.1579 | 431.5867 | 1292.746 | 1.04  | 0.00045  | 62.15388 |
| P01024     | 0 | 0.8261 | 547.3486 | 1093.69  | 3.7   | 0.00202  | 24.98479 |
| P01024     | 0 | 1      | 533.3055 | 2130.2   | 2.41  | 0.00128  | 63.28512 |
| P01024     | 1 | 0.7692 | 464.6213 | 1391.849 | 1.65  | 0.00077  | 15.02949 |
| P01024     | 0 | 1      | 545.5769 | 2179.286 | 2.61  | 0.00142  | 23.56545 |
| P01024     | 0 | 0.2558 | 580.3687 | 1159.73  | 1.1   | 0.00064  | 5.791723 |
| P01024     | 0 | 0.2857 | 648.0354 | 1942.092 | 1.48  | 0.00096  | 36.76591 |
| P01024     | 0 | 0.9697 | 670.6865 | 2010.045 | 1.87  | 0.00125  | 3.212496 |
| P01024; OS | 0 | 0.62   | 532.3347 | 1063.662 | 1.8   | 0.00096  | 29.72895 |
| P01024     | 0 | 0.8611 | 692.7316 | 2076.18  | 3.36  | 0.00233  | 6.759931 |
| P01024     | 0 | 0.8846 | 519.8016 | 2076.184 | 5.44  | 0.00282  | 26.76847 |
| P01024     | 0 | 1      | 713.3527 | 1425.698 | 0.26  | 0.00018  | 18.99341 |
| P01024     | 0 | 1      | 714.38   | 1427.753 | 5.48  | 0.00391  | 7.388453 |
| P01024     | 0 | 0.86   | 606.331  | 1211.655 | 1.3   | 0.00079  | 0        |
| P01024     | 0 | 0.32   | 618.8709 | 1236.734 | 1.96  | 0.00121  | 1.957112 |
| P01024     | 1 | 0.7391 | 571.3159 | 2282.242 | 1.45  | 0.00083  | 1.791034 |
| P01024     | 0 | 1      | 687.5389 | 2747.134 | 1.93  | 0.00133  | 5.373046 |
| P01024     | 0 | 0.8974 | 595.3314 | 1783.98  | 2.86  | 0.0017   | 7.454174 |
| P01024     | 0 | 0.6667 | 545.3093 | 1633.913 | 5.7   | 0.0031   | 25.47194 |
| P01024     | 0 | 0.6905 | 718.9286 | 1436.85  | 2.47  | 0.00177  | 11.08955 |
| P01024     | 0 | 0.5312 | 648.0363 | 1942.094 | 2.8   | 0.00181  | 36.31767 |
| P01024     | 0 | 0.8222 | 547.3475 | 1093.688 | 1.69  | 0.00092  | 45.18101 |
| P01024     | 0 | 0.4483 | 603.8007 | 1206.594 | 2.94  | 0.00177  | 27.39233 |
| P01024     | 0 | 0.9524 | 603.7999 | 1206.593 | 1.72  | 0.00104  | 11.77612 |
| P01024     | 0 | 0.7636 | 510.3035 | 1019.6   | 2.21  | 0.00113  | 20.77922 |
| P01024     | 0 | 0.7959 | 484.7924 | 968.5774 | 1.72  | 0.00083  | 24.91194 |
| P01024     | 0 | 0.8    | 418.915  | 1254.731 | 1.53  | 0.00064  | 20.23393 |
| P01024     | 2 | 1      | 696.4076 | 2782.609 | 6.07  | 0.00422  | 24.44337 |
| P01024     | 0 | 0.68   | 546.8306 | 1092.654 | 3.27  | 0.00179  | 20.75942 |
| P01024     | 0 | 0.7419 | 499.6073 | 1496.807 | 0.75  | 0.00037  | 33.14555 |
| P01024     | 0 | 0.6279 | 656.8652 | 1312.723 | 4.38  | 0.00288  | 25.65546 |
| P01024     | 0 | 0.2353 | 438.245  | 1312.72  | 2.37  | 0.00104  | 9.080698 |
| P01024     | 0 | 0.9091 | 1005.526 | 2010.045 | 1.78  | 0.00179  | 0        |
| P01024     | 1 | 0.9714 | 503.9535 | 1509.846 | 2.6   | 0.00131  | 17.91397 |
| P01024     | 0 | 0.8333 | 807.9468 | 1614.886 | 2.7   | 0.00218  | 0        |
| P01024     | 0 | 0.4146 | 377.5851 | 1130.741 | 1.84  | 0.00069  | 5.956144 |
| P01024     | 1 | 0.7143 | 493.9356 | 1479.792 | 1.89  | 0.00093  | 24.89801 |
| P01024     | 0 | 1      | 491.2533 | 1471.745 | 0.86  | 0.00042  | 0        |
| P01024     | 1 | 1      | 421.2299 | 1681.898 | 4.02  | 0.00169  | 11.76248 |
| P01024     | 1 | 0.5806 | 509.6469 | 1526.926 | 0.33  | 0.00017  | 11.51297 |
| P01024     | 0 | 1      | 708.5617 | 3538.779 | 5.02  | 0.00355  | 6.348145 |
| P01024     | 0 | 1      | 818.7404 | 2454.207 | -0.08 | -0.00007 | 3.260694 |
| P01024     | 0 | 0.3846 | 648.0365 | 1942.095 | 3.18  | 0.00206  | 11.15637 |
| P01024     | 0 | 1      | 595.815  | 1190.623 | 1.93  | 0.00115  | 0.988152 |
| P01024     | 1 | 0.9487 | 659.0031 | 1974.995 | 2.45  | 0.00161  | 4.105151 |
| P01024     | 0 | 0.8621 | 818.7399 | 2454.205 | -0.68 | -0.00056 | 3.202533 |
| P01024     | 0 | 1      | 667.8659 | 1334.725 | 1.53  | 0.00102  | 3.419898 |
| P01024     | 1 | 0.9487 | 659.0031 | 1974.995 | 2.45  | 0.00161  | 4.105151 |
| P01024     | 0 | 0.5882 | 690.9219 | 1380.837 | 1.83  | 0.00127  | 13.61996 |

|        |   |        |          |          |       |          |          |
|--------|---|--------|----------|----------|-------|----------|----------|
| P01024 | 0 | 0.4483 | 382.9015 | 1146.69  | 2.33  | 0.00089  | 8.019503 |
| P01024 | 0 | 0.9565 | 708.5599 | 3538.771 | 2.6   | 0.00184  | 4.174822 |
| P01024 | 1 | 1      | 668.9388 | 1336.87  | 2.06  | 0.00138  | 5.169005 |
| P01024 | 0 | 1      | 705.8653 | 1410.723 | 2.26  | 0.00159  | 3.73944  |
| P01024 | 1 | 0.913  | 378.2163 | 1509.843 | 0.99  | 0.00037  | 13.65654 |
| P01024 | 0 | 0.8409 | 484.7918 | 968.5762 | 0.46  | 0.00022  | 41.4712  |
| P01024 | 1 | 0.4286 | 509.647  | 1526.927 | 0.57  | 0.00029  | 27.55706 |
| P01024 | 0 | 1      | 880.0903 | 2638.256 | 2.39  | 0.0021   | 2.396597 |
| P01024 | 0 | 0.8444 | 547.3482 | 1093.689 | 2.92  | 0.0016   | 0        |
| P01024 | 1 | 0.4048 | 410.2561 | 1638.003 | 3.39  | 0.00139  | 3.976753 |
| P01024 | 0 | 0.9302 | 807.9479 | 1614.889 | 4.14  | 0.00334  | 0        |
| P01024 | 0 | 1      | 505.6141 | 1514.828 | -3.85 | -0.00194 | 28.33048 |
| P01024 | 0 | 0.7414 | 587.8704 | 1174.733 | 4.18  | 0.00246  | 8.474478 |
| P01024 | 0 | 0.3514 | 387.2486 | 1159.731 | 2.04  | 0.00079  | 11.84036 |
| P01024 | 0 | 0.7021 | 546.831  | 1092.655 | 4.05  | 0.00221  | 3.266834 |
| P01024 | 0 | 0.7692 | 418.9153 | 1254.731 | 2.04  | 0.00085  | 14.52722 |
| P01024 | 0 | 0.2778 | 438.2442 | 1312.718 | 0.49  | 0.00021  | 8.690989 |
| P01024 | 0 | 0.9636 | 1107.508 | 2214.01  | 2.32  | 0.00256  | 0        |
| P01024 | 0 | 1      | 510.9579 | 1530.859 | 2.6   | 0.00133  | 14.25692 |
| P01024 | 0 | 0.641  | 656.8637 | 1312.72  | 2.15  | 0.00141  | 54.50566 |
| P01024 | 0 | 0.8788 | 880.0895 | 2638.254 | 1.41  | 0.00124  | 14.36848 |
| P01024 | 0 | 1      | 1090.146 | 2179.285 | 2.34  | 0.00255  | 0        |
| P01024 | 0 | 0.7105 | 718.9287 | 1436.85  | 2.63  | 0.00189  | 12.14149 |
| P01024 | 1 | 0.7308 | 559.9744 | 1677.909 | 4.62  | 0.00258  | 30.26162 |
| P01024 | 0 | 1      | 445.5797 | 1334.724 | 1.49  | 0.00066  | 5.667696 |
| P01024 | 0 | 0.9796 | 645.3084 | 1289.609 | 1.08  | 0.0007   | 26.4501  |
| P01024 | 0 | 0.8846 | 505.6169 | 1514.836 | 1.71  | 0.00086  | 51.20999 |
| P01024 | 1 | 0.5    | 509.6472 | 1526.927 | 0.93  | 0.00048  | 70.21364 |
| P01024 | 0 | 1      | 504.6129 | 1511.824 | 1.68  | 0.00085  | 5.873374 |
| P01024 | 0 | 0.9394 | 499.6079 | 1496.809 | 2.03  | 0.00101  | 6.715208 |
| P01024 | 1 | 1      | 421.229  | 1681.894 | 1.91  | 0.0008   | 22.77313 |
| P01024 | 2 | 1      | 702.1777 | 3506.859 | -1.73 | -0.00121 | 0.276747 |
| P01024 | 0 | 0.8667 | 880.0887 | 2638.252 | 0.51  | 0.00045  | 2.49393  |
| P01024 | 0 | 0.5385 | 482.7749 | 1928.078 | 0.6   | 0.00029  | 9.641109 |
| P01024 | 0 | 0.5538 | 493.8236 | 986.6399 | 3.28  | 0.00162  | 12.41327 |
| P01024 | 0 | 0.9516 | 603.8004 | 1206.594 | 2.53  | 0.00153  | 34.70613 |
| P01024 | 1 | 1      | 493.9356 | 1479.792 | 1.89  | 0.00093  | 49.40816 |
| P01024 | 0 | 1      | 764.3989 | 2291.182 | 3.16  | 0.00241  | 0        |
| P01024 | 0 | 0.7292 | 404.5564 | 1211.655 | 1.17  | 0.00047  | 0        |
| P01024 | 1 | 0.6786 | 691.3656 | 2762.441 | 0.16  | 0.00011  | 11.3296  |
| P01024 | 0 | 1      | 595.8152 | 1190.623 | 2.23  | 0.00133  | 0.933831 |
| P01024 | 0 | 0.8611 | 418.9151 | 1254.731 | 1.67  | 0.0007   | 56.51604 |
| P01024 | 0 | 1      | 667.8658 | 1334.724 | 1.43  | 0.00096  | 19.19712 |
| P01024 | 0 | 0.7903 | 510.3032 | 1019.599 | 1.62  | 0.00082  | 7.884241 |
| P01024 | 0 | 1      | 595.8157 | 1190.624 | 3.05  | 0.00182  | 0        |
| P01024 | 0 | 0.8    | 499.6081 | 1496.81  | 2.4   | 0.0012   | 15.24384 |
| P01024 | 0 | 0.9643 | 786.7085 | 2358.111 | 1.88  | 0.00148  | 11.44798 |
| P01024 | 0 | 0.875  | 648.0361 | 1942.094 | 2.52  | 0.00163  | 45.95354 |
| P01024 | 0 | 0.8667 | 599.3306 | 1795.977 | 8.83  | 0.00529  | 5.760993 |
| P01024 | 0 | 0.4167 | 382.9012 | 1146.689 | 1.45  | 0.00055  | 14.87472 |
| P01024 | 0 | 0.9348 | 573.8296 | 1146.652 | 2.82  | 0.00162  | 24.53609 |
| P01024 | 0 | 0.7174 | 583.8094 | 1166.612 | 3.2   | 0.00186  | 4.421603 |

|            |   |        |          |          |       |          |          |
|------------|---|--------|----------|----------|-------|----------|----------|
| P01024     | 0 | 0.7059 | 555.8184 | 1110.629 | 2.57  | 0.00143  | 0        |
| P01024     | 0 | 0.871  | 649.0172 | 1945.037 | 1.92  | 0.00125  | 21.66901 |
| P01024     | 1 | 0.8723 | 885.9965 | 1770.986 | 1.48  | 0.00131  | 3.572867 |
| P01024     | 0 | 0.4091 | 583.8655 | 1166.724 | 2.45  | 0.00143  | 2.912181 |
| P01024     | 0 | 0.4318 | 618.8712 | 1236.735 | 2.45  | 0.00152  | 0        |
| P01024     | 0 | 0.9706 | 504.6119 | 1511.821 | -0.26 | -0.00013 | 7.411877 |
| P01024     | 0 | 0.7297 | 599.3269 | 1795.966 | 2.61  | 0.00156  | 48.49725 |
| P01024     | 1 | 0.9535 | 839.4558 | 1677.904 | 2.01  | 0.00169  | 7.570782 |
| P01024     | 0 | 0.8929 | 1159.095 | 2317.182 | -0.18 | -0.00021 | 0        |
| P01024     | 1 | 0.6471 | 464.6212 | 1391.849 | 1.46  | 0.00068  | 11.90851 |
| P01024     | 1 | 1      | 761.4187 | 2282.242 | 1.43  | 0.00109  | 6.976895 |
| P01024     | 0 | 0.4062 | 648.0374 | 1942.098 | 4.5   | 0.00291  | 29.0237  |
| P01024     | 2 | 1      | 513.544  | 2051.154 | 4.03  | 0.00207  | 31.61909 |
| P01024     | 0 | 0.7321 | 587.8702 | 1174.733 | 3.87  | 0.00227  | 10.16192 |
| P01024     | 0 | 0.7895 | 450.9031 | 1350.695 | 1.57  | 0.0007   | 25.40508 |
| P01024     | 1 | 1      | 561.3036 | 1681.896 | 3.12  | 0.00175  | 23.94676 |
| P01024     | 0 | 0.875  | 885.4478 | 3538.769 | 2.28  | 0.00201  | 5.602897 |
| P01024; OS | 0 | 0.6735 | 532.3348 | 1063.662 | 2.14  | 0.00114  | 12.74101 |
| P01024     | 0 | 0.8889 | 547.3476 | 1093.688 | 1.8   | 0.00099  | 27.57678 |
| P01024     | 0 | 0.5833 | 885.4472 | 3538.767 | 1.59  | 0.0014   | 5.304733 |
| P01024     | 0 | 0.9118 | 452.5892 | 1355.753 | -1.58 | -0.00071 | 40.30692 |
| P01024     | 0 | 0.619  | 602.5674 | 2407.248 | 2.88  | 0.00173  | 8.66717  |
| P01024     | 0 | 1      | 738.6745 | 2214.009 | 2.03  | 0.0015   | 68.09644 |
| P01024     | 0 | 0.9333 | 504.7896 | 2016.136 | 0.27  | 0.00013  | 28.92328 |
| P01024     | 0 | 0.7692 | 648.6968 | 1944.076 | 2.25  | 0.00146  | 13.05819 |
| P01024     | 0 | 0.881  | 532.8397 | 1064.672 | 1.45  | 0.00077  | 10.64838 |
| P01024     | 0 | 0.3333 | 431.5873 | 1292.747 | 2.46  | 0.00106  | 14.96847 |
| P01024     | 1 | 0.6429 | 410.2564 | 1638.004 | 3.91  | 0.0016   | 39.34185 |
| P01024     | 1 | 0.5789 | 509.648  | 1526.929 | 2.43  | 0.00124  | 40.71249 |
| P01024     | 0 | 0.7021 | 546.83   | 1092.653 | 2.26  | 0.00124  | 5.814992 |
| P01024     | 0 | 0.2955 | 580.3701 | 1159.733 | 3.42  | 0.00198  | 0        |
| P01024     | 0 | 1      | 738.6751 | 2214.011 | 2.78  | 0.00205  | 0        |
| P01024     | 0 | 0.9455 | 584.8134 | 1168.62  | 3.68  | 0.00215  | 5.499272 |
| P01024     | 0 | 1      | 539.2888 | 1615.852 | 3.57  | 0.00192  | 48.38189 |
| P01024     | 1 | 0.1081 | 683.375  | 1365.743 | 2.11  | 0.00144  | 34.94502 |
| P01024     | 1 | 0.9545 | 526.0393 | 2101.135 | 0.45  | 0.00024  | 29.17065 |
| P01024     | 0 | 0.7381 | 404.5559 | 1211.653 | 0.11  | 0.00004  | 10.16623 |
| P01024     | 0 | 0.4    | 530.2695 | 1588.794 | 1.32  | 0.0007   | 4.461038 |
| P01024     | 0 | 0.8036 | 510.3033 | 1019.599 | 1.86  | 0.00095  | 5.634512 |
| P01024     | 0 | 1      | 786.7092 | 2358.113 | 2.73  | 0.00215  | 26.34435 |
| P01024     | 0 | 0.6667 | 546.8294 | 1092.652 | 1.15  | 0.00063  | 43.82499 |
| P01024     | 0 | 0.7    | 656.8638 | 1312.72  | 2.24  | 0.00147  | 10.86452 |
| P01024     | 0 | 0.7321 | 516.7971 | 1032.587 | 2.28  | 0.00118  | 4.9656   |
| P01024     | 0 | 0.75   | 476.5879 | 1427.749 | 2.88  | 0.00137  | 9.500804 |
| P01024     | 0 | 1      | 818.7427 | 2454.213 | 2.75  | 0.00225  | 29.58549 |
| P01024     | 0 | 0.8788 | 643.3632 | 1928.075 | -0.81 | -0.00052 | 25.97827 |
| P01024     | 0 | 0.9167 | 1179.559 | 2358.11  | 1.44  | 0.0017   | 0.870138 |
| P01024     | 0 | 1      | 738.6742 | 2214.008 | 1.62  | 0.0012   | 2.592724 |
| P01024     | 2 | 1      | 587.3208 | 2346.261 | 5.37  | 0.00315  | 0        |
| P01024     | 0 | 0.5588 | 487.0146 | 1945.036 | 1.57  | 0.00076  | 0        |
| P01024     | 0 | 0.8125 | 573.8293 | 1146.651 | 2.29  | 0.00131  | 12.43238 |
| P01024     | 0 | 0.5833 | 431.5877 | 1292.748 | 3.23  | 0.00139  | 67.68532 |

|            |   |        |          |          |       |          |          |
|------------|---|--------|----------|----------|-------|----------|----------|
| P01024; OS | 0 | 0.58   | 532.3359 | 1063.664 | 4.09  | 0.00218  | 14.26944 |
| P01024     | 0 | 1      | 450.9027 | 1350.694 | 0.75  | 0.00034  | 46.27835 |
| P01024     | 0 | 0.9565 | 450.9034 | 1350.696 | 2.38  | 0.00107  | 15.38576 |
| P01024     | 1 | 1      | 561.3032 | 1681.895 | 2.47  | 0.00138  | 13.82616 |
| P01024; OS | 0 | 0.5814 | 532.3342 | 1063.661 | 0.88  | 0.00047  | 6.692185 |
| P01024     | 1 | 1      | 421.2289 | 1681.894 | 1.62  | 0.00068  | 46.6876  |
| P01024     | 0 | 0.5172 | 648.0355 | 1942.092 | 1.67  | 0.00108  | 30.70085 |
| P01024     | 0 | 0.4375 | 382.9014 | 1146.69  | 2.09  | 0.0008   | 7.968709 |
| P01024     | 0 | 1      | 499.6076 | 1496.808 | 1.36  | 0.00068  | 19.43667 |
| P01024     | 0 | 1      | 478.5756 | 1433.712 | 1.55  | 0.00074  | 0        |
| P01024     | 0 | 0.8298 | 532.8407 | 1064.674 | 3.28  | 0.00175  | 25.85593 |
| P01024; OS | 0 | 0.4091 | 532.3358 | 1063.664 | 3.86  | 0.00206  | 60.61178 |
| P01024     | 1 | 0.8214 | 572.797  | 2288.166 | 1.91  | 0.00109  | 16.93087 |
| P01024     | 0 | 0.7692 | 515.8178 | 1030.628 | 1.82  | 0.00094  | 27.12353 |
| P01024     | 1 | 0.619  | 668.4338 | 1335.86  | 2.43  | 0.00163  | 10.67565 |
| P01024     | 0 | 0.7917 | 599.3273 | 1795.967 | 3.33  | 0.00199  | 0        |
| P01024     | 0 | 0.3654 | 493.8231 | 986.639  | 2.35  | 0.00116  | 20.43558 |
| P01024     | 0 | 0.7812 | 515.818  | 1030.629 | 2.17  | 0.00112  | 8.192772 |
| P01024     | 0 | 1      | 1446.123 | 2891.239 | 2.81  | 0.00407  | 0        |
| P01024     | 0 | 0.8214 | 643.3683 | 1928.09  | 7.16  | 0.0046   | 16.33719 |
| P01024     | 0 | 0.44   | 648.0344 | 1942.089 | -0.12 | -0.00008 | 11.52841 |
| P01024     | 0 | 0.3846 | 549.0026 | 1644.993 | 2.14  | 0.00117  | 65.45551 |
| P01024     | 0 | 1      | 478.576  | 1433.714 | 2.38  | 0.00114  | 13.83794 |
| P01024     | 2 | 1      | 702.1763 | 3506.853 | -3.64 | -0.00255 | 11.5659  |
| P01024     | 0 | 0.619  | 588.8493 | 1176.691 | 3.96  | 0.00233  | 14.91845 |
| P01024     | 0 | 0.25   | 479.6211 | 1436.849 | 1.71  | 0.00082  | 8.092014 |
| P01024     | 2 | 0.0345 | 477.517  | 1907.046 | 1.4   | 0.00067  | 47.09988 |
| P01024     | 0 | 0.9429 | 717.3608 | 1433.714 | 2.92  | 0.00209  | 0        |
| P01024     | 0 | 0.5333 | 583.8097 | 1166.612 | 3.72  | 0.00217  | 2.005855 |
| P01024     | 0 | 0.6842 | 392.249  | 1174.732 | 3.23  | 0.00127  | 7.749425 |
| P01024     | 0 | 0.7838 | 645.8811 | 1290.755 | 3.26  | 0.0021   | 28.04943 |
| P01024     | 0 | 0.8077 | 781.4174 | 2342.238 | 2.37  | 0.00185  | 2.017628 |
| P01024     | 0 | 0.925  | 532.8394 | 1064.672 | 0.87  | 0.00046  | 45.72959 |
| P01024     | 0 | 0.4815 | 382.9014 | 1146.69  | 2.09  | 0.0008   | 8.235432 |
| P01024     | 0 | 0.7317 | 546.8295 | 1092.652 | 1.37  | 0.00075  | 16.09895 |
| P01024; OS | 0 | 0.7091 | 460.2835 | 919.5597 | 1.83  | 0.00084  | 3.409078 |
| P01024     | 1 | 0.7692 | 571.3178 | 2282.249 | 4.76  | 0.00272  | 7.314544 |
| P01024     | 0 | 0.7568 | 627.8693 | 1254.731 | 2.17  | 0.00136  | 19.40027 |
| P01024     | 0 | 0.5455 | 480.9409 | 1440.808 | -0.49 | -0.00024 | 7.730431 |
| P01024     | 0 | 0.8214 | 622.3397 | 2486.337 | 1.11  | 0.00069  | 33.68331 |
| P01024     | 1 | 0.9091 | 503.9522 | 1509.842 | 0.17  | 0.00009  | 36.15313 |
| P01024     | 1 | 0.95   | 571.3153 | 2282.239 | 0.38  | 0.00022  | 10.12941 |
| P01024     | 0 | 0.6341 | 588.8485 | 1176.69  | 2.51  | 0.00148  | 0        |
| P01024     | 0 | 0.7143 | 588.8495 | 1176.692 | 4.27  | 0.00251  | 20.67884 |
| P01024     | 0 | 0.7667 | 552.3311 | 1103.655 | 0.68  | 0.00037  | 11.63104 |
| P01024     | 0 | 0.9062 | 828.4669 | 1655.927 | 1.72  | 0.00142  | 6.508906 |
| P01024     | 1 | 1      | 561.3042 | 1681.898 | 4.21  | 0.00236  | 0        |
| P01024     | 0 | 0.9231 | 470.9121 | 1410.722 | 1.23  | 0.00058  | 46.46935 |
| P01024     | 0 | 0.775  | 404.5564 | 1211.655 | 1.24  | 0.0005   | 7.829526 |
| P01024     | 0 | 0.8696 | 885.4484 | 3538.772 | 2.97  | 0.00262  | 4.292865 |
| P01024     | 0 | 0.9062 | 451.2558 | 1351.753 | 2.65  | 0.0012   | 2.493932 |
| P01024     | 0 | 0.931  | 504.9394 | 1512.804 | 1.7   | 0.00086  | 9.625627 |

|            |   |        |          |          |       |          |          |
|------------|---|--------|----------|----------|-------|----------|----------|
| P01024     | 0 | 1      | 622.3408 | 2486.341 | 2.88  | 0.00179  | 56.91244 |
| P01024     | 1 | 1      | 567.9521 | 1701.842 | 1.79  | 0.00101  | 4.987516 |
| P01024     | 0 | 0.5217 | 523.9392 | 1569.803 | 1.93  | 0.00101  | 9.810185 |
| P01024     | 0 | 1      | 595.8147 | 1190.622 | 1.41  | 0.00084  | 29.86287 |
| P01024     | 0 | 1      | 774.0101 | 2320.016 | -0.26 | -0.0002  | 64.8847  |
| P01024     | 0 | 0.9615 | 667.8656 | 1334.724 | 1.07  | 0.00071  | 36.45114 |
| P01024     | 0 | 0.4286 | 648.0367 | 1942.096 | 3.55  | 0.0023   | 27.95452 |
| P01024     | 0 | 0.6905 | 591.8643 | 1182.721 | 4.55  | 0.00269  | 15.44733 |
| P01024     | 0 | 0.3889 | 509.5517 | 2035.185 | 3.34  | 0.0017   | 39.1162  |
| P01024     | 0 | 0.8276 | 880.0883 | 2638.25  | 0.1   | 0.00008  | 1.559483 |
| P01024     | 0 | 0.4643 | 648.0376 | 1942.098 | 4.87  | 0.00316  | 12.78673 |
| P01024     | 0 | 0.9474 | 803.0861 | 2407.244 | 1.19  | 0.00095  | 77.91226 |
| P01024     | 0 | 1      | 885.4446 | 3538.757 | -1.31 | -0.00116 | 17.65957 |
| P01024     | 1 | 1      | 375.7207 | 1499.861 | 2.4   | 0.0009   | 30.85749 |
| P01024     | 1 | 0.9722 | 740.4    | 1479.793 | 2.27  | 0.00168  | 10.09031 |
| P01024     | 0 | 0.8913 | 532.8399 | 1064.673 | 1.79  | 0.00095  | 24.00579 |
| P01024     | 0 | 0.6875 | 552.3311 | 1103.655 | 0.68  | 0.00037  | 0        |
| P01024     | 1 | 1      | 493.935  | 1479.79  | 0.71  | 0.00035  | 14.55597 |
| P01024     | 0 | 0.7755 | 573.8312 | 1146.655 | 5.59  | 0.00321  | 35.92996 |
| P01024     | 0 | 0.6279 | 588.8482 | 1176.689 | 2.09  | 0.00123  | 6.332741 |
| P01024     | 0 | 0.8049 | 547.3478 | 1093.688 | 2.25  | 0.00123  | 34.99136 |
| P01024; OS | 0 | 0.7234 | 532.3346 | 1063.662 | 1.68  | 0.0009   | 5.901869 |
| P01024     | 0 | 1      | 465.5803 | 1394.726 | 0.73  | 0.00034  | 70.46812 |
| P01024     | 0 | 1      | 714.3776 | 1427.748 | 2.14  | 0.00153  | 6.180002 |
| P01024     | 0 | 0.6829 | 722.8483 | 1444.689 | -0.35 | -0.00025 | 0        |
| P01024     | 0 | 0.9545 | 604.6194 | 1811.844 | 2.51  | 0.00151  | 39.38744 |
| P01024     | 0 | 1      | 470.9125 | 1410.723 | 2.07  | 0.00097  | 31.41291 |
| P01024     | 1 | 1      | 615.9874 | 1845.948 | 3.79  | 0.00233  | 9.956991 |
| P01024     | 0 | 0.5    | 382.9011 | 1146.689 | 1.29  | 0.00049  | 13.73068 |
| P01024     | 0 | 0.3148 | 573.8496 | 1146.692 | 3.91  | 0.00224  | 5.263508 |
| P01024     | 1 | 1      | 594.017  | 1780.036 | 0.22  | 0.00013  | 0.140251 |
| P01024     | 0 | 1      | 452.5899 | 1355.755 | 0.04  | 0.00002  | 18.00065 |
| P01024     | 0 | 0.625  | 595.3309 | 1783.978 | 2.14  | 0.00127  | 24.50599 |
| P01024     | 0 | 1      | 625.8164 | 1250.626 | 1.9   | 0.00119  | 0        |
| P01024     | 0 | 0.8182 | 817.4566 | 1633.906 | 1.22  | 0.001    | 0        |
| P01024     | 0 | 0.7778 | 588.8489 | 1176.691 | 3.34  | 0.00196  | 31.07891 |
| P01024     | 0 | 0.65   | 583.8093 | 1166.611 | 2.99  | 0.00174  | 5.231005 |
| P01024     | 0 | 1      | 693.3605 | 2078.067 | -0.35 | -0.00024 | 12.40254 |
| P01024     | 1 | 0.1053 | 439.2823 | 1315.832 | 1.7   | 0.00075  | 36.19715 |
| P01024     | 0 | 0.6667 | 504.9395 | 1512.804 | 1.82  | 0.00092  | 6.677652 |
| P01024     | 0 | 0.9    | 676.8573 | 1352.707 | 2.4   | 0.00163  | 0        |
| P01024     | 0 | 1      | 738.6732 | 2214.005 | 0.21  | 0.00016  | 0        |
| P01024     | 0 | 0.7333 | 392.2481 | 1174.73  | 1.05  | 0.00041  | 9.140336 |
| P01024     | 0 | 0.7368 | 431.588  | 1292.749 | 3.87  | 0.00167  | 20.75518 |
| P01024     | 0 | 1      | 450.9038 | 1350.697 | 3.26  | 0.00147  | 44.20295 |
| P01024     | 1 | 0.9062 | 707.0376 | 2119.098 | 3.03  | 0.00214  | 26.8794  |
| P01024     | 0 | 0.7812 | 392.2481 | 1174.73  | 0.9   | 0.00035  | 5.281031 |
| P01024     | 0 | 1      | 545.5762 | 2179.283 | 1.38  | 0.00075  | 18.94294 |
| P01024     | 0 | 0.75   | 476.5867 | 1427.745 | 0.38  | 0.00018  | 15.49583 |
| P01024     | 0 | 0.6061 | 690.9211 | 1380.835 | 0.6   | 0.00041  | 0.43442  |
| P01024     | 0 | 0.7143 | 627.8698 | 1254.732 | 2.85  | 0.00179  | 28.77794 |
| P01024     | 0 | 0.0976 | 565.8764 | 1130.746 | 6.04  | 0.00341  | 0        |

|            |   |        |          |          |       |          |          |
|------------|---|--------|----------|----------|-------|----------|----------|
| P01024     | 0 | 0.6279 | 588.8492 | 1176.691 | 3.75  | 0.00221  | 10.89429 |
| P01024     | 0 | 0.775  | 475.9045 | 1425.699 | 0.7   | 0.00033  | 5.071131 |
| P01024     | 0 | 0.9111 | 542.2837 | 1083.56  | 1.79  | 0.00097  | 14.06775 |
| P01024     | 0 | 0.7556 | 546.8302 | 1092.653 | 2.6   | 0.00142  | 37.75628 |
| P01024     | 1 | 0.8077 | 571.3159 | 2282.242 | 1.56  | 0.00089  | 11.17065 |
| P01024     | 0 | 0.7959 | 510.304  | 1019.601 | 3.05  | 0.00156  | 24.16283 |
| P01024     | 0 | 1      | 803.0869 | 2407.246 | 2.18  | 0.00175  | 45.0176  |
| P01024     | 2 | 1      | 877.4714 | 3506.864 | -0.47 | -0.00041 | 25.37721 |
| P01024     | 1 | 0.6957 | 503.9533 | 1509.845 | 2.17  | 0.00109  | 17.82155 |
| P01024     | 0 | 0.7857 | 509.5507 | 2035.181 | 1.36  | 0.00069  | 24.83649 |
| P01024     | 0 | 0.84   | 532.84   | 1064.673 | 1.9   | 0.00101  | 18.29566 |
| P01024     | 0 | 0.4839 | 552.3323 | 1103.657 | 3     | 0.00166  | 8.732166 |
| P01024     | 1 | 1      | 588.3184 | 2350.252 | -0.9  | -0.00053 | 52.29385 |
| P01024     | 1 | 1      | 500.6247 | 1499.859 | 1.45  | 0.00073  | 17.85411 |
| P01024     | 0 | 0.6    | 573.829  | 1146.651 | 1.87  | 0.00107  | 0        |
| P01024     | 0 | 1      | 774.0101 | 2320.016 | -0.26 | -0.0002  | 0        |
| P01024     | 0 | 0.9    | 849.4223 | 3394.667 | 2.38  | 0.00202  | 8.229027 |
| P01024     | 0 | 0.6154 | 530.2708 | 1588.798 | 3.74  | 0.00198  | 0        |
| P01024     | 0 | 0.6364 | 690.9221 | 1380.837 | 2.01  | 0.00139  | 49.46531 |
| P01024     | 0 | 1      | 773.0664 | 2317.185 | 0.9   | 0.00069  | 0        |
| P01024     | 1 | 1      | 528.9768 | 1584.916 | 0.96  | 0.00051  | 15.75557 |
| P01024     | 0 | 1      | 773.065  | 2317.18  | -0.92 | -0.00071 | 14.31365 |
| P01024     | 1 | 1      | 375.7208 | 1499.861 | 2.81  | 0.00105  | 8.276955 |
| P01024     | 0 | 0.4643 | 1065.603 | 2130.2   | 2.13  | 0.00227  | 3.804996 |
| P01024     | 0 | 0.7719 | 516.797  | 1032.587 | 2.04  | 0.00105  | 9.618594 |
| P01024     | 1 | 0.7742 | 396.2483 | 1186.73  | 2.31  | 0.00091  | 3.043154 |
| P01024     | 0 | 1      | 545.9609 | 1635.868 | 2.19  | 0.0012   | 7.475727 |
| P01024     | 0 | 0.1667 | 500.9681 | 1500.89  | 1.36  | 0.00068  | 61.18779 |
| P01024     | 0 | 0.8636 | 786.7084 | 2358.111 | 1.8   | 0.00142  | 5.683824 |
| P01024     | 0 | 0.9    | 738.6745 | 2214.009 | 2.03  | 0.0015   | 0        |
| P01024     | 0 | 0.75   | 573.8301 | 1146.653 | 3.68  | 0.00211  | 13.30647 |
| P01024     | 0 | 0.6818 | 573.8301 | 1146.653 | 3.68  | 0.00211  | 4.15098  |
| P01024     | 0 | 0.6364 | 885.4469 | 3538.766 | 1.24  | 0.0011   | 1.33282  |
| P01024     | 1 | 1      | 461.6141 | 1382.828 | 3.07  | 0.00141  | 46.19294 |
| P01024     | 0 | 0.2826 | 580.3693 | 1159.731 | 2.16  | 0.00125  | 5.839186 |
| P01024; OS | 0 | 0.6591 | 532.3352 | 1063.663 | 2.83  | 0.00151  | 0        |
| P01024     | 0 | 0.8889 | 552.647  | 1655.926 | 1.6   | 0.00088  | 7.625573 |
| P01024     | 0 | 1      | 738.6738 | 2214.007 | 1.12  | 0.00083  | 30.875   |
| P01024     | 1 | 0.1176 | 571.3165 | 2282.244 | 2.52  | 0.00144  | 9.758818 |
| P01024     | 0 | 0.7692 | 530.2703 | 1588.796 | 2.82  | 0.00149  | 63.37735 |
| P01024     | 1 | 1      | 461.6141 | 1382.828 | 3.07  | 0.00141  | 46.19294 |
| P01024     | 0 | 0.7045 | 547.3479 | 1093.689 | 2.36  | 0.00129  | 35.03806 |
| P01024     | 0 | 0.7949 | 588.8486 | 1176.69  | 2.72  | 0.0016   | 15.17854 |
| P01024     | 0 | 0.5306 | 377.5849 | 1130.74  | 1.19  | 0.00045  | 7.857436 |
| P01024     | 0 | 0.6667 | 583.8093 | 1166.611 | 2.99  | 0.00174  | 5.105981 |
| P01024     | 0 | 0.6341 | 648.8601 | 1296.713 | 4.6   | 0.00298  | 9.97804  |
| P01024     | 0 | 1      | 436.6629 | 2179.285 | 2.37  | 0.00103  | 7.806824 |
| P01024     | 0 | 0.6562 | 546.8296 | 1092.652 | 1.48  | 0.00081  | 26.69226 |
| P01024     | 0 | 0.8889 | 654.3379 | 1960.999 | 2.42  | 0.00158  | 28.03566 |
| P01024     | 0 | 1      | 803.0845 | 2407.239 | -0.79 | -0.00064 | 17.11488 |
| P01024     | 0 | 0.7241 | 456.9049 | 1368.7   | 0.8   | 0.00036  | 45.79394 |
| P01024     | 1 | 0.2188 | 390.9329 | 1170.784 | 2.38  | 0.00093  | 32.48123 |

|            |   |        |          |          |       |          |          |
|------------|---|--------|----------|----------|-------|----------|----------|
| P01024     | 0 | 0.8824 | 645.329  | 1933.973 | 3.54  | 0.00228  | 2.558857 |
| P01024     | 1 | 0.625  | 761.4202 | 2282.246 | 3.35  | 0.00255  | 37.87062 |
| P01024     | 0 | 0.7059 | 476.588  | 1427.749 | 3.14  | 0.00149  | 21.40702 |
| P01024     | 0 | 0.9722 | 1107.507 | 2214.007 | 1.1   | 0.00122  | 0        |
| P01024     | 0 | 1      | 549.0041 | 1644.998 | 4.92  | 0.0027   | 8.657015 |
| P01024     | 0 | 0.8857 | 773.4728 | 1545.938 | 0.67  | 0.00052  | 18.10392 |
| P01024     | 0 | 0.8696 | 510.9579 | 1530.859 | 2.54  | 0.0013   | 15.93233 |
| P01024     | 0 | 0.9444 | 672.7202 | 2016.146 | 5.09  | 0.00342  | 10.68467 |
| P01024     | 0 | 0.6531 | 583.8099 | 1166.613 | 4.14  | 0.00241  | 6.83206  |
| P01024     | 0 | 0.7885 | 587.8677 | 1174.728 | -0.29 | -0.00017 | 5.546717 |
| P01024     | 0 | 0.551  | 573.8508 | 1146.694 | 6.04  | 0.00346  | 0        |
| P01024     | 0 | 1      | 667.8652 | 1334.723 | 0.43  | 0.00029  | 3.290244 |
| P01024     | 0 | 0.6286 | 718.9289 | 1436.851 | 2.89  | 0.00208  | 7.18483  |
| P01024; Q7 | 1 | 1      | 417.5987 | 1250.782 | 1.91  | 0.0008   | 11.28629 |
| P01024     | 0 | 0.8636 | 880.0898 | 2638.255 | 1.76  | 0.00155  | 1.77588  |
| P01024     | 0 | 1      | 642.3265 | 1283.646 | 2.2   | 0.00141  | 100      |
| P01024     | 0 | 0.8444 | 542.284  | 1083.561 | 2.35  | 0.00127  | 40.16504 |
| P01024     | 0 | 0.973  | 532.8395 | 1064.672 | 1.1   | 0.00059  | 59.57505 |
| P01024     | 1 | 0.381  | 513.2692 | 1537.793 | 2.74  | 0.00141  | 11.07192 |
| P01024     | 0 | 0.9375 | 532.8399 | 1064.673 | 1.79  | 0.00095  | 36.03547 |
| P01024     | 0 | 0.3333 | 648.0373 | 1942.097 | 4.4   | 0.00285  | 37.46886 |
| P01024     | 1 | 1      | 493.9353 | 1479.791 | 1.45  | 0.00072  | 17.96102 |
| P01024     | 1 | 0.7857 | 559.9728 | 1677.904 | 1.78  | 0.001    | 42.28728 |
| P01024     | 0 | 0.9444 | 571.3041 | 2852.491 | -1.9  | -0.00109 | 37.61379 |
| P01024     | 0 | 0.5593 | 493.8253 | 986.6433 | 6.74  | 0.00333  | 8.27927  |
| P01024     | 0 | 0.3478 | 493.8229 | 986.6385 | 1.92  | 0.00095  | 14.97456 |
| P01024     | 0 | 0.5455 | 660.3183 | 2638.251 | 0.46  | 0.0003   | 0        |
| P01024     | 0 | 0.9744 | 684.8541 | 1368.701 | 1.45  | 0.00099  | 22.58687 |
| P01024     | 0 | 0.6667 | 404.5563 | 1211.654 | 1.01  | 0.00041  | 0        |
| P01024     | 0 | 0.8571 | 648.0364 | 1942.095 | 3.08  | 0.002    | 56.59838 |
| P01024     | 0 | 1      | 654.338  | 1960.999 | 2.61  | 0.0017   | 31.65231 |
| P01024     | 0 | 0.6744 | 546.8297 | 1092.652 | 1.7   | 0.00093  | 10.98269 |
| P01024     | 0 | 0.8636 | 545.3074 | 1633.908 | 2.22  | 0.00121  | 5.323332 |
| P01024     | 0 | 1      | 545.5767 | 2179.285 | 2.16  | 0.00118  | 6.366291 |
| P01024     | 0 | 1      | 499.6072 | 1496.807 | 0.5   | 0.00025  | 37.56438 |
| P01024     | 0 | 1      | 964.4171 | 2891.237 | 2.2   | 0.00212  | 0        |
| P01024     | 0 | 0.6591 | 573.8298 | 1146.652 | 3.25  | 0.00186  | 7.657873 |
| P01024     | 1 | 0.8182 | 571.3152 | 2282.239 | 0.27  | 0.00016  | 0        |
| P01024     | 0 | 0.65   | 643.3654 | 1928.082 | 2.7   | 0.00173  | 10.68926 |
| P01024     | 0 | 1      | 764.4017 | 2291.19  | 6.84  | 0.00522  | 59.9624  |
| P01024     | 0 | 0.9583 | 465.5806 | 1394.727 | 1.45  | 0.00067  | 0        |
| P01024     | 0 | 1      | 923.9529 | 1846.898 | 1.99  | 0.00184  | 8.27962  |
| P01024     | 0 | 0.8    | 431.5872 | 1292.747 | 2.03  | 0.00088  | 48.54261 |
| P01024     | 1 | 0.4688 | 763.9675 | 1526.928 | 1.38  | 0.00105  | 6.767378 |
| P01024     | 0 | 1      | 738.6746 | 2214.009 | 2.2   | 0.00162  | 9.524781 |
| P01024     | 0 | 0.5588 | 583.8088 | 1166.61  | 2.25  | 0.00132  | 0        |
| P01024     | 1 | 0.7917 | 480.7777 | 960.5481 | 0.85  | 0.00041  | 0        |
| P01024     | 0 | 0.7368 | 546.8302 | 1092.653 | 2.6   | 0.00142  | 7.386324 |
| P01024     | 1 | 1      | 923.4755 | 1845.944 | 1.58  | 0.00146  | 0        |
| P01024     | 0 | 1      | 545.5764 | 2179.284 | 1.6   | 0.00087  | 0        |
| P01024     | 0 | 0.8182 | 605.9907 | 1815.957 | 1.69  | 0.00102  | 0        |
| P01024     | 1 | 0.6667 | 420.2318 | 1677.905 | 2.5   | 0.00105  | 6.231005 |



|            |   |        |          |          |       |          |          |
|------------|---|--------|----------|----------|-------|----------|----------|
| P01024     | 0 | 0.9048 | 719.702  | 2157.091 | 2.66  | 0.00191  | 17.48965 |
| P01024; OS | 0 | 0.7    | 532.3342 | 1063.661 | 0.88  | 0.00047  | 13.69359 |
| P01024     | 0 | 1      | 504.9383 | 1512.8   | -0.42 | -0.00021 | 70.8731  |
| P01024     | 0 | 0.9048 | 552.647  | 1655.927 | 1.71  | 0.00094  | 10.06548 |
| P01024     | 0 | 0.5439 | 511.814  | 1022.621 | 1.79  | 0.00091  | 13.52388 |
| P01024     | 0 | 0.7692 | 892.4914 | 1783.976 | 0.61  | 0.00054  | 0        |
| P01024     | 0 | 0.6061 | 499.7617 | 998.5161 | 2.54  | 0.00127  | 37.72398 |
| P01024     | 0 | 0.8846 | 721.8314 | 1442.656 | 2.16  | 0.00156  | 0        |
| P01024     | 0 | 0.6275 | 501.7972 | 1002.587 | 1.92  | 0.00096  | 15.65265 |
| P01024     | 0 | 0.88   | 893.4403 | 1785.873 | 1.22  | 0.00109  | 3.576018 |
| P01024     | 1 | 1      | 461.6135 | 1382.826 | 1.75  | 0.0008   | 43.02078 |
| P01024     | 0 | 0.8462 | 409.8927 | 1227.663 | 2.63  | 0.00107  | 17.33604 |
| P01024     | 1 | 1      | 461.6135 | 1382.826 | 1.75  | 0.0008   | 43.02078 |
| P01024     | 0 | 0.36   | 583.8642 | 1166.721 | 0.14  | 0.00008  | 6.085474 |
| P01024     | 0 | 0.7561 | 588.8494 | 1176.692 | 4.17  | 0.00245  | 46.93943 |
| P01024     | 0 | 0.9032 | 717.3599 | 1433.712 | 1.64  | 0.00118  | 7.014114 |
| P01024     | 1 | 0.75   | 571.3176 | 2282.249 | 4.55  | 0.0026   | 46.35453 |
| P01024     | 0 | 0.7451 | 516.7985 | 1032.59  | 5     | 0.00258  | 20.12809 |
| P01024     | 0 | 0.75   | 404.5563 | 1211.654 | 1.01  | 0.00041  | 12.67189 |
| P01024     | 0 | 0.7857 | 552.3328 | 1103.658 | 3.78  | 0.00208  | 0        |
| P01024     | 0 | 0.4828 | 382.901  | 1146.688 | 0.97  | 0.00037  | 8.258221 |
| P01024     | 0 | 0.3158 | 387.2485 | 1159.731 | 1.72  | 0.00067  | 8.386262 |
| P01024     | 0 | 0.8077 | 552.3323 | 1103.657 | 2.89  | 0.00159  | 33.58055 |
| P01024     | 1 | 0.8125 | 921.4885 | 2762.451 | 3.88  | 0.00357  | 27.81056 |
| P01024     | 0 | 1      | 738.6743 | 2214.008 | 1.79  | 0.00132  | 0        |
| P01024     | 0 | 0.9091 | 849.423  | 3394.67  | 3.24  | 0.00275  | 0        |
| P01024     | 0 | 1      | 539.2858 | 1615.843 | -1.98 | -0.00107 | 26.92057 |
| P01024     | 1 | 0.9333 | 483.6208 | 1448.848 | 1.66  | 0.0008   | 19.15943 |
| P01024     | 0 | 0.64   | 552.3325 | 1103.658 | 3.22  | 0.00178  | 65.16335 |
| P01024     | 1 | 0.75   | 707.0364 | 2119.095 | 1.38  | 0.00098  | 16.93656 |
| P01024     | 0 | 0.5952 | 573.8501 | 1146.693 | 4.87  | 0.00279  | 17.21188 |
| P01024     | 0 | 0.92   | 530.2697 | 1588.795 | 1.67  | 0.00088  | 26.71694 |
| P01024     | 0 | 0.9231 | 539.2875 | 1615.848 | 1.08  | 0.00058  | 64.33107 |
| P01024     | 0 | 0.7778 | 545.3074 | 1633.908 | 2.34  | 0.00127  | 46.42766 |
| P01024     | 1 | 0.5517 | 509.6466 | 1526.925 | -0.27 | -0.00014 | 13.50613 |
| P01024     | 0 | 0.7586 | 1179.559 | 2358.11  | 1.65  | 0.00195  | 0        |
| P01024     | 0 | 1      | 606.3318 | 1211.656 | 2.61  | 0.00158  | 0        |
| P01024     | 0 | 0.5667 | 546.8301 | 1092.653 | 2.49  | 0.00136  | 33.79175 |
| P01024     | 1 | 0.8108 | 397.9238 | 1191.757 | 1.47  | 0.00058  | 31.14958 |
| P01024     | 0 | 1      | 595.9642 | 1785.878 | 3.99  | 0.00237  | 53.43063 |
| P01024     | 1 | 0.8108 | 397.9238 | 1191.757 | 1.47  | 0.00058  | 31.14958 |
| P01024     | 0 | 0.7907 | 510.3038 | 1019.6   | 2.81  | 0.00143  | 40.43241 |
| P01024     | 0 | 1      | 667.8677 | 1334.728 | 4.18  | 0.00279  | 9.618825 |
| P01024     | 0 | 1      | 539.2864 | 1615.845 | -0.85 | -0.00046 | 10.45022 |
| P01024     | 0 | 0.6538 | 624.684  | 1872.037 | 1.9   | 0.00118  | 70.01386 |
| P01024     | 0 | 0.7292 | 588.8472 | 1176.687 | 0.33  | 0.00019  | 5.46774  |
| P01024     | 0 | 0.375  | 885.4479 | 3538.77  | 2.41  | 0.00214  | 12.32391 |
| P01024     | 0 | 1      | 648.0393 | 1942.103 | 7.42  | 0.0048   | 46.0386  |
| P01024     | 0 | 0.5    | 648.0366 | 1942.095 | 3.37  | 0.00218  | 45.49703 |
| P01024     | 0 | 0.7297 | 515.8174 | 1030.628 | 1.1   | 0.00057  | 10.45339 |
| P01024     | 1 | 0.9091 | 586.8334 | 2344.312 | 2.98  | 0.00174  | 29.16484 |
| P01024     | 0 | 0.9762 | 603.7993 | 1206.591 | 0.71  | 0.00043  | 0        |

|        |   |        |          |          |       |          |          |
|--------|---|--------|----------|----------|-------|----------|----------|
| P01024 | 0 | 0.9091 | 565.9467 | 1695.826 | 0.33  | 0.00019  | 12.09396 |
| P01024 | 0 | 1      | 545.9604 | 1635.867 | 1.3   | 0.00071  | 28.86658 |
| P01024 | 0 | 0.6818 | 648.6968 | 1944.076 | 2.34  | 0.00152  | 6.403956 |
| P01024 | 0 | 1      | 595.9636 | 1785.876 | 2.86  | 0.0017   | 11.40218 |
| P01024 | 1 | 0.8333 | 1015.172 | 3043.502 | 2.31  | 0.00235  | 0        |
| P01024 | 0 | 1      | 721.8312 | 1442.655 | 1.82  | 0.00132  | 0        |
| P01024 | 1 | 1      | 591.001  | 1770.988 | 3.02  | 0.00178  | 9.871649 |
| P01024 | 0 | 0      | 648.0371 | 1942.097 | 4.03  | 0.00261  | 25.08841 |
| P01024 | 0 | 1      | 667.8669 | 1334.726 | 2.99  | 0.00199  | 33.37525 |
| P01024 | 0 | 0.8182 | 828.4662 | 1655.925 | 0.83  | 0.00069  | 0        |
| P01024 | 0 | 1      | 625.8154 | 1250.624 | 0.34  | 0.00021  | 0        |
| P01024 | 0 | 0.7692 | 484.793  | 968.5787 | 3.04  | 0.00147  | 0        |
| P01024 | 0 | 0.7353 | 583.8091 | 1166.611 | 2.67  | 0.00156  | 25.27555 |
| P01024 | 1 | 0.6579 | 696.4278 | 1391.848 | 0.96  | 0.00067  | 10.75634 |
| P01024 | 0 | 0.3333 | 438.2441 | 1312.718 | 0.28  | 0.00012  | 34.31989 |
| P01024 | 0 | 1      | 785.4064 | 1569.805 | 3.57  | 0.0028   | 0        |
| P01024 | 0 | 0.6154 | 697.0513 | 2089.139 | 1.93  | 0.00134  | 7.758032 |
| P01024 | 0 | 0.8261 | 817.4573 | 1633.907 | 2.12  | 0.00173  | 2.249765 |
| P01024 | 2 |        | 477.517  | 1907.046 | 1.4   | 0.00067  | 47.09988 |
| P01024 | 0 | 0.48   | 476.5878 | 1427.749 | 2.69  | 0.00128  | 34.0836  |
| P01024 | 2 |        | 477.517  | 1907.046 | 1.4   | 0.00067  | 47.09988 |
| P01024 | 1 | 1      | 559.9732 | 1677.905 | 2.44  | 0.00136  | 42.87915 |
| P01024 | 0 | 0.6486 | 588.8486 | 1176.69  | 2.82  | 0.00166  | 35.02979 |
| P01024 | 0 | 1      | 642.3266 | 1283.646 | 2.39  | 0.00154  | 9.54295  |
| P01024 | 0 | 1      | 738.6741 | 2214.008 | 1.5   | 0.00111  |          |
| P01024 | 0 | 0.6774 | 627.8698 | 1254.732 | 2.95  | 0.00185  | 5.324896 |
| P01024 | 0 | 0.8286 | 532.8407 | 1064.674 | 3.28  | 0.00175  | 59.54812 |
| P01024 | 1 | 0.875  | 503.9526 | 1509.843 | 0.9   | 0.00045  | 44.28659 |
| P01024 | 0 | 0.6923 | 510.3031 | 1019.599 | 1.32  | 0.00067  | 48.52712 |
| P01024 | 0 | 0.9697 | 773.4727 | 1545.938 | 0.51  | 0.0004   | 25.30762 |
| P01024 | 0 | 1      | 1319.63  | 2638.253 | 1.16  | 0.00154  | 0        |
| P01024 | 0 | 0.7391 | 430.9224 | 1290.753 | 1.4   | 0.0006   | 12.97479 |
| P01024 | 0 |        | 377.5855 | 1130.742 | 2.73  | 0.00103  | 22.03847 |
| P01024 | 0 | 0.4118 | 523.0403 | 2089.139 | 1.86  | 0.00097  | 0        |
| P01024 | 0 | 1      | 764.4038 | 2291.197 | 9.55  | 0.0073   | 3.894335 |
| P01024 | 1 | 0.96   | 420.2315 | 1677.904 | 1.77  | 0.00074  | 22.23221 |
| P01024 | 0 | 0.1351 | 583.866  | 1166.725 | 3.28  | 0.00192  | 15.43483 |
| P01024 | 0 | 0.6857 | 510.3047 | 1019.602 | 4.55  | 0.00232  | 22.23052 |
| P01024 | 0 | 0.75   | 573.8297 | 1146.652 | 2.93  | 0.00168  | 0        |
| P01024 | 1 | 1      | 511.9389 | 1533.802 | 2.12  | 0.00108  | 28.30771 |
| P01024 | 1 | 0.7143 | 657.9472 | 1314.887 | 2.91  | 0.00191  | 8.861692 |
| P01024 | 1 | 1      | 511.9389 | 1533.802 | 2.12  | 0.00108  | 28.30771 |
| P01024 | 0 | 1      | 510.9577 | 1530.859 | 2.19  | 0.00111  | 35.90475 |
| P01024 | 1 | 0.8889 | 761.6302 | 3043.499 | 1.43  | 0.00109  | 9.393605 |
| P01024 | 0 | 0.92   | 605.9892 | 1815.953 | -0.73 | -0.00044 | 65.62952 |
| P01024 | 0 | 0.3659 | 493.8229 | 986.6386 | 1.98  | 0.00098  | 43.50087 |
| P01024 | 0 | 0.963  | 510.9578 | 1530.859 | 2.3   | 0.00118  | 34.0215  |
| P01024 | 0 | 1      | 708.5582 | 3538.762 | 0.1   | 0.00007  | 2.903505 |
| P01024 | 0 | 0.913  | 517.9133 | 1551.725 | 1.47  | 0.00076  | 4.754052 |
| P01024 | 0 | 0.9091 | 614.3358 | 1227.664 | 3.36  | 0.00206  | 9.028971 |
| P01024 | 0 | 0.5882 | 587.8706 | 1174.734 | 4.6   | 0.0027   | 55.9561  |
| P01024 | 0 | 0.6842 | 519.8005 | 2076.18  | 3.32  | 0.00173  | 23.49956 |

|        |   |        |          |          |       |          |          |
|--------|---|--------|----------|----------|-------|----------|----------|
| P01024 | 0 | 0.1364 | 662.7061 | 1986.104 | 5.39  | 0.00357  | 59.12737 |
| P01024 | 0 | 0.5789 | 418.9145 | 1254.729 | 0.29  | 0.00012  | 55.80648 |
| P01024 | 0 | 0.6512 | 511.8141 | 1022.621 | 1.97  | 0.00101  | 24.91138 |
| P01024 | 0 | 1      | 923.9516 | 1846.896 | 0.61  | 0.00056  | 6.842917 |
| P01024 | 0 | 0.9231 | 627.8695 | 1254.732 | 2.46  | 0.00155  | 18.4508  |
| P01024 | 0 | 0.9412 | 605.9926 | 1815.963 | 4.92  | 0.00298  | 12.95977 |
| P01024 | 0 | 0.6087 | 504.9394 | 1512.804 | 1.76  | 0.00089  | 10.91038 |
| P01024 | 0 | 0.975  | 603.8007 | 1206.594 | 3.04  | 0.00183  | 40.90488 |
| P01024 | 1 | 1      | 1015.172 | 3043.501 | 1.95  | 0.00198  | 0        |
| P01024 | 0 | 1      | 808.4291 | 1615.851 | 2.93  | 0.00237  | 5.879544 |
| P01024 | 0 | 0.7097 | 678.3828 | 1355.758 | 2.24  | 0.00152  | 0        |
| P01024 | 0 | 0.8    | 591.8637 | 1182.72  | 3.62  | 0.00214  | 11.66604 |
| P01024 | 1 | 1      | 740.3993 | 1479.791 | 1.36  | 0.001    | 0        |
| P01024 | 1 | 0.6111 | 571.3167 | 2282.245 | 2.95  | 0.00168  | 6.78936  |
| P01024 | 0 | 0.8222 | 546.8323 | 1092.657 | 6.51  | 0.00356  | 23.04784 |
| P01024 | 1 | 1      | 511.9396 | 1533.804 | 3.43  | 0.00175  | 54.79261 |
| P01024 | 1 | 1      | 511.9396 | 1533.804 | 3.43  | 0.00175  | 54.79261 |
| P01024 | 0 | 0.2727 | 614.3093 | 2454.215 | 3.47  | 0.00213  | 71.10449 |
| P01024 | 0 | 0.7727 | 545.3074 | 1633.908 | 2.22  | 0.00121  | 4.673029 |
| P01024 | 0 | 0.5    | 382.9013 | 1146.689 | 1.69  | 0.00064  | 20.9894  |
| P01024 | 0 | 0      | 648.0358 | 1942.093 | 2.14  | 0.00139  | 15.02305 |
| P01024 | 0 | 0.7419 | 476.5877 | 1427.749 | 2.56  | 0.00122  | 35.07749 |
| P01024 | 0 | 0.2    | 482.2353 | 1444.691 | 1     | 0.00048  | 0        |
| P01024 | 1 | 0.8824 | 483.6196 | 1448.844 | -0.87 | -0.00042 | 70.98856 |
| P01024 | 0 | 0.6471 | 599.3267 | 1795.965 | 2.21  | 0.00132  | 7.656238 |
| P01024 | 0 | 0.6944 | 510.304  | 1019.601 | 3.05  | 0.00156  | 47.45063 |
| P01024 | 0 | 0.7895 | 1005.524 | 2010.041 | -0.1  | -0.0001  | 31.16234 |
| P01024 | 0 | 1      | 756.904  | 1512.801 | -0.23 | -0.00017 | 0        |
| P01024 | 0 | 1      | 738.6748 | 2214.01  | 2.45  | 0.00181  | 0        |
| P01024 | 1 | 0.5385 | 513.2687 | 1537.791 | 1.67  | 0.00086  | 35.55772 |
| P01024 | 0 | 1      | 517.9134 | 1551.726 | 1.71  | 0.00088  | 0        |
| P01024 | 0 | 0.7778 | 627.8707 | 1254.734 | 4.31  | 0.00271  | 0        |
| P01024 | 0 | 1      | 576.0538 | 2301.193 | 2.43  | 0.0014   | 3.697288 |
| P01024 | 0 | 1      | 675.8515 | 1350.696 | 2.34  | 0.00158  | 0        |
| P01024 | 1 | 1      | 750.4333 | 1499.859 | 1.36  | 0.00102  | 5.85879  |
| P01024 | 0 | 0.8696 | 1005.526 | 2010.045 | 2.09  | 0.0021   | 6.91111  |
| P01024 | 0 | 1      | 565.949  | 1695.833 | 4.44  | 0.00251  | 25.1817  |
| P01024 | 0 | 0.4091 | 382.9016 | 1146.69  | 2.56  | 0.00098  | 0        |
| P01024 | 0 | 1      | 738.6745 | 2214.009 | 2.03  | 0.0015   | 7.746558 |
| P01024 | 0 | 0.7742 | 627.8712 | 1254.735 | 5.19  | 0.00325  | 9.546235 |
| P01024 | 0 | 0.8378 | 510.3045 | 1019.602 | 4.19  | 0.00214  | 37.3288  |
| P01024 | 0 | 0.8889 | 757.9358 | 1514.864 | 2.65  | 0.00201  | 6.703103 |
| P01024 | 0 | 1      | 885.4495 | 3538.776 | 4.21  | 0.00372  | 38.04567 |
| P01024 | 0 | 1      | 667.8658 | 1334.724 | 1.34  | 0.0009   | 42.41177 |
| P01024 | 0 | 1      | 565.9482 | 1695.83  | 3.03  | 0.00171  | 50.1368  |
| P01024 | 0 | 0.75   | 476.5885 | 1427.751 | 4.29  | 0.00204  | 17.43116 |
| P01024 | 0 | 0.3529 | 389.5414 | 1166.61  | 1.56  | 0.00061  | 25.66426 |
| P01024 | 0 | 1      | 803.0871 | 2407.247 | 2.48  | 0.00199  | 91.35889 |
| P01024 | 0 | 0.6857 | 484.7923 | 968.5773 | 1.53  | 0.00074  | 0        |
| P01024 | 0 | 0.3889 | 648.6958 | 1944.073 | 0.74  | 0.00048  | 8.421431 |
| P01024 | 1 | 1      | 740.3995 | 1479.792 | 1.69  | 0.00125  | 1.892336 |
| P01024 | 0 | 0.9    | 685.8709 | 1370.735 | 2.26  | 0.00155  | 0        |

|            |   |        |          |          |       |          |          |
|------------|---|--------|----------|----------|-------|----------|----------|
| P01024     | 2 |        | 379.2481 | 1513.97  | 2.34  | 0.00089  | 6.425385 |
| P01024     | 2 |        | 379.2481 | 1513.97  | 2.34  | 0.00089  | 6.425385 |
| P01024     | 0 | 1      | 880.0888 | 2638.252 | 0.65  | 0.00057  | 38.10561 |
| P01024     | 1 | 0.65   | 571.317  | 2282.246 | 3.48  | 0.00199  | 5.637302 |
| P01024     | 0 | 0.7778 | 475.9046 | 1425.699 | 1.08  | 0.00052  | 4.100976 |
| P01024     | 1 | 0.6154 | 761.4181 | 2282.24  | 0.63  | 0.00048  | 7.989108 |
| P01024     | 0 | 0.68   | 547.3478 | 1093.688 | 2.14  | 0.00117  | 6.111754 |
| P01024     | 0 | 1      | 645.3283 | 1933.97  | 2.41  | 0.00155  | 8.058928 |
| P01024     | 0 | 1      | 624.6843 | 1872.038 | 2.49  | 0.00155  | 20.54414 |
| P01024     | 0 | 0.7838 | 499.7615 | 998.5157 | 2.11  | 0.00105  | 4.442496 |
| P01024     | 1 | 0.375  | 483.6207 | 1448.847 | 1.41  | 0.00068  | 50.56187 |
| P01024     | 0 | 1      | 738.6741 | 2214.008 | 1.46  | 0.00107  | 16.46152 |
| P01024     | 0 | 0.5    | 504.9392 | 1512.803 | 1.22  | 0.00061  | 76.93637 |
| P01024     | 0 | 0.6667 | 1038.592 | 2076.177 | 1.99  | 0.00206  | 0        |
| P01024     | 0 | 0.6471 | 773.0701 | 2317.196 | 5.64  | 0.00436  | 18.98074 |
| P01024     | 0 | 0.7895 | 533.3093 | 2130.215 | 9.51  | 0.00507  | 40.89769 |
| P01024     | 0 | 1      | 604.6192 | 1811.843 | 2.2   | 0.00133  | 13.40726 |
| P01024     | 0 | 0.3    | 387.2478 | 1159.729 | -0.01 | 0        | 15.91447 |
| P01024     | 0 | 0.4    | 648.0372 | 1942.097 | 4.21  | 0.00273  | 10.10804 |
| P01024     | 1 | 0.0857 | 767.4038 | 1533.8   | 0.93  | 0.00072  | 0        |
| P01024     | 1 | 0.2258 | 390.933  | 1170.784 | 2.62  | 0.00102  | 35.96939 |
| P01024     | 1 | 0.913  | 438.9665 | 1314.885 | 1.16  | 0.00051  | 48.83235 |
| P01024     | 0 | 0.8095 | 505.626  | 1514.863 | 1.97  | 0.001    | 53.23386 |
| P01024     | 0 | 1      | 595.8145 | 1190.622 | 1.11  | 0.00066  | 3.525381 |
| P01024     | 1 | 0.75   | 921.4867 | 2762.446 | 1.96  | 0.0018   | 44.47349 |
| P01024     | 0 | 0.8333 | 424.7119 | 1695.826 | 0.4   | 0.00017  | 78.40486 |
| P01024     | 0 | 0.7    | 546.8297 | 1092.652 | 1.59  | 0.00087  | 6.653565 |
| P01024; OS | 0 | 0.7333 | 532.3348 | 1063.662 | 2.14  | 0.00114  | 6.09545  |
| P01024     | 0 | 0.1    | 500.9684 | 1500.891 | 2.15  | 0.00108  | 0        |
| P01024     | 0 | 0.4857 | 510.3042 | 1019.601 | 3.53  | 0.0018   | 43.21545 |
| P01024     | 0 | 0      | 479.6219 | 1436.851 | 3.24  | 0.00155  | 4.861784 |
| P01024     | 0 | 0.7143 | 605.9917 | 1815.961 | 3.4   | 0.00206  | 13.00969 |
| P01024     | 0 | 0.4138 | 583.8095 | 1166.612 | 3.3   | 0.00193  | 6.351749 |
| P01024     | 1 | 1      | 745.407  | 2234.207 | 3.5   | 0.00261  | 6.842923 |
| P01024     | 0 | 0.9231 | 685.8706 | 1370.734 | 1.82  | 0.00125  | 17.04296 |
| P01024     | 0 | 0.9444 | 530.2687 | 1588.791 | -0.29 | -0.00015 | 39.2995  |
| P01024     | 0 | 0.7059 | 603.7993 | 1206.591 | 0.71  | 0.00043  | 32.7053  |
| P01024     | 0 | 1      | 676.8594 | 1352.711 | 5.47  | 0.0037   | 22.19567 |
| P04114     | 0 | 0.9254 | 562.3297 | 1684.974 | 1.78  | 0.001    | 7.678353 |
| P04114     | 0 | 0.9091 | 671.8355 | 1342.664 | 1.54  | 0.00103  | 3.294633 |
| P04114     | 0 | 1      | 888.4462 | 1775.885 | 1.52  | 0.00135  | 0        |
| P04114     | 0 | 1      | 489.6132 | 1466.825 | 0.37  | 0.00018  | 66.47633 |
| P04114     | 0 | 0.6379 | 562.3297 | 1684.975 | 1.89  | 0.00106  | 6.588665 |
| P04114     | 0 | 1      | 475.6133 | 1424.825 | 1.78  | 0.00084  | 22.38718 |
| P04114     | 0 | 0.9091 | 712.9164 | 1424.825 | 1.79  | 0.00127  | 17.83965 |
| P04114     | 0 | 0.9535 | 475.6125 | 1424.823 | 0.04  | 0.00002  | 4.203761 |
| P04114     | 0 | 0.931  | 712.9156 | 1424.824 | 0.67  | 0.00048  | 3.233114 |
| P04114     | 0 | 0.9556 | 475.6128 | 1424.824 | 0.69  | 0.00033  | 0        |
| P04114     | 0 | 0.8909 | 589.82   | 1178.633 | 3.51  | 0.00207  | 2.316912 |
| P04114     | 0 | 1      | 668.3922 | 1335.777 | 0.7   | 0.00047  | 6.438231 |
| P04114     | 0 | 0.9839 | 661.8252 | 1322.643 | 1.66  | 0.0011   | 8.574846 |
| P04114     | 0 | 1      | 489.5864 | 1466.745 | 1.07  | 0.00052  | 3.751423 |

|        |   |        |          |          |      |         |          |
|--------|---|--------|----------|----------|------|---------|----------|
| P04114 | 0 | 0.9833 | 733.8754 | 1466.744 | 0.41 | 0.0003  | 3.531101 |
| P04114 | 0 | 0.95   | 733.8756 | 1466.744 | 0.66 | 0.00048 | 9.95089  |
| P04114 | 0 | 0.9744 | 719.0294 | 2155.074 | 0.15 | 0.00011 | 0        |
| P04114 | 0 | 1      | 719.0317 | 2155.081 | 3.46 | 0.00249 | 39.48687 |
| P04114 | 0 | 0.8913 | 648.3423 | 1295.677 | 4.71 | 0.00305 | 5.423463 |
| P04114 | 0 | 0.9688 | 494.9185 | 1482.741 | 1.97 | 0.00098 | 11.24194 |
| P04114 | 0 | 0.9608 | 498.2756 | 1990.08  | 2.82 | 0.0014  | 0        |
| P04114 | 0 | 0.9123 | 656.3834 | 1311.759 | 3.33 | 0.00218 | 9.090432 |
| P04114 | 0 | 0.8478 | 437.2508 | 1309.738 | 1.84 | 0.00081 | 8.858871 |
| P04114 | 0 | 1      | 655.3726 | 1309.738 | 1.85 | 0.00121 | 6.296742 |
| P04114 | 0 | 0.9857 | 498.2746 | 1990.076 | 0.79 | 0.0004  | 7.190231 |
| P04114 | 0 | 0.9861 | 664.032  | 1990.082 | 3.38 | 0.00224 | 11.43456 |
| P04114 | 0 | 0.9    | 429.2437 | 1285.717 | 2.46 | 0.00105 | 8.121521 |
| P04114 | 0 | 0.7963 | 606.8307 | 1212.654 | 3.15 | 0.00191 | 16.50888 |
| P04114 | 0 | 0.6    | 765.9476 | 1530.888 | 1.34 | 0.00103 | 3.660219 |
| P04114 | 0 | 0.6875 | 525.6519 | 1574.941 | 3.57 | 0.00188 | 12.50804 |
| P04114 | 0 | 0.9796 | 434.2431 | 1300.715 | 1.42 | 0.00062 | 9.703751 |
| P04114 | 0 | 0.875  | 765.9256 | 1530.844 | 2.17 | 0.00166 | 8.095461 |
| P04114 | 0 | 0.9464 | 510.9532 | 1530.845 | 2.81 | 0.00144 | 8.287645 |
| P04114 | 0 | 0.7292 | 652.3796 | 1303.752 | 1.54 | 0.001   | 58.58208 |
| P04114 | 0 | 1      | 452.8837 | 1356.637 | 2.36 | 0.00107 | 52.1926  |
| P04114 | 1 | 1      | 431.4948 | 1722.957 | 2.52 | 0.00109 | 36.84549 |
| P04114 | 0 | 0.75   | 678.8218 | 1356.636 | 2.19 | 0.00149 | 21.04242 |
| P04114 | 1 | 1      | 857.4137 | 2570.227 | 0.64 | 0.00055 | 5.86468  |
| P04114 | 0 | 1      | 484.2579 | 1450.759 | 2.29 | 0.00111 | 21.3595  |
| P04114 | 0 | 0.9167 | 380.5767 | 1139.716 | 1.51 | 0.00057 | 3.633371 |
| P04114 | 0 | 0.9268 | 752.8569 | 1504.706 | 1.9  | 0.00143 | 0        |
| P04114 | 0 | 1      | 469.919  | 1407.743 | 2.61 | 0.00123 | 39.37512 |
| P04114 | 0 | 0.9714 | 651.3749 | 1952.11  | 3.58 | 0.00233 | 13.91869 |
| P04114 | 0 | 1      | 488.782  | 1952.106 | 1.5  | 0.00073 | 10.98878 |
| P04114 | 0 | 0.9643 | 725.8831 | 1450.759 | 2.09 | 0.00152 | 2.580118 |
| P04114 | 0 | 1      | 484.2572 | 1450.757 | 0.78 | 0.00038 | 5.257349 |
| P04114 | 0 | 1      | 484.2577 | 1450.758 | 1.73 | 0.00083 | 32.02574 |
| P04114 | 0 | 1      | 463.6114 | 1388.82  | 4.11 | 0.0019  | 64.51563 |
| P04114 | 0 | 0.5818 | 581.3535 | 1161.7   | 3.17 | 0.00184 | 12.29018 |
| P04114 | 0 | 1      | 484.2573 | 1450.757 | 0.9  | 0.00044 | 36.95274 |
| P04114 | 1 | 0.907  | 809.3797 | 2426.125 | 0.71 | 0.00057 | 3.396551 |
| P04114 | 1 | 0.907  | 809.3797 | 2426.125 | 0.71 | 0.00057 | 3.396551 |
| P04114 | 0 | 0.963  | 389.9592 | 1556.815 | 3.89 | 0.00152 | 33.56322 |
| P04114 | 0 | 0.8889 | 381.8849 | 1143.64  | 0.88 | 0.00034 | 4.497948 |
| P04114 | 0 | 0.8286 | 381.8852 | 1143.641 | 1.76 | 0.00067 | 27.46516 |
| P04114 | 0 | 0.8923 | 633.007  | 1897.006 | 4.43 | 0.0028  | 8.623389 |
| P04114 | 0 | 0.878  | 633.0074 | 1897.008 | 5.11 | 0.00323 | 3.617055 |
| P04114 | 0 | 0.9608 | 806.0969 | 2416.276 | 2.69 | 0.00217 | 8.592494 |
| P04114 | 0 | 0.8077 | 694.8818 | 1388.756 | 1.59 | 0.0011  | 10.83513 |
| P04114 | 0 | 1      | 389.9584 | 1556.812 | 1.7  | 0.00066 | 11.19557 |
| P04114 | 0 | 1      | 519.609  | 1556.812 | 2.22 | 0.00115 | 44.70229 |
| P04114 | 2 | 0.987  | 706.3796 | 2822.497 | 2.53 | 0.00178 | 5.943409 |
| P04114 | 2 | 1      | 565.3049 | 2822.495 | 2    | 0.00113 | 7.988802 |
| P04114 | 2 | 0.9821 | 706.379  | 2822.494 | 1.66 | 0.00117 | 6.002202 |
| P04114 | 2 | 0.9722 | 941.5031 | 2822.495 | 1.84 | 0.00173 | 7.3026   |
| P04114 | 0 | 0.9659 | 680.3347 | 2038.99  | 2.37 | 0.00161 | 5.095828 |

|        |   |        |          |          |       |          |          |
|--------|---|--------|----------|----------|-------|----------|----------|
| P04114 | 0 | 0.913  | 616.3399 | 1847.005 | 2.78  | 0.00171  | 0        |
| P04114 | 0 | 0.9647 | 1019.998 | 2038.99  | 2.41  | 0.00245  | 5.225675 |
| P04114 | 0 | 0.8861 | 680.333  | 2038.984 | -0.23 | -0.00016 | 11.99382 |
| P04114 | 0 | 0.8713 | 924.0053 | 1847.003 | 1.73  | 0.0016   | 6.383188 |
| P04114 | 0 | 0.875  | 616.3391 | 1847.003 | 1.4   | 0.00086  | 8.113494 |
| P04114 | 0 | 0.9444 | 616.3388 | 1847.002 | 1     | 0.00062  | 0        |
| P04114 | 1 | 0.8519 | 889.4671 | 2666.387 | -0.65 | -0.00058 | 6.4054   |
| P04114 | 1 | 0.871  | 889.4705 | 2666.397 | 3.13  | 0.00278  | 0        |
| P04114 | 1 | 0.8824 | 889.4724 | 2666.403 | 5.26  | 0.00467  | 3.917206 |
| P04114 | 1 | 0.8571 | 667.3539 | 2666.394 | 1.95  | 0.0013   | 10.02872 |
| P04114 | 1 | 0.9545 | 667.3539 | 2666.394 | 1.95  | 0.0013   | 4.581666 |
| P04114 | 1 | 0.9821 | 889.4702 | 2666.396 | 2.78  | 0.00247  | 7.462214 |
| P04114 | 1 | 1      | 667.3541 | 2666.394 | 2.23  | 0.00149  | 5.646883 |
| P04114 | 1 | 0.9375 | 667.3561 | 2666.402 | 5.25  | 0.0035   | 2.791625 |
| P04114 | 1 | 1      | 889.4688 | 2666.392 | 1.27  | 0.00113  | 5.8158   |
| P04114 | 1 | 1      | 667.3533 | 2666.391 | 1.04  | 0.00069  | 5.912683 |
| P04114 | 0 | 0.8478 | 747.4257 | 1493.844 | -0.8  | -0.0006  | 12.95047 |
| P04114 | 0 | 1      | 712.6957 | 2136.072 | 1.21  | 0.00086  | 12.31516 |
| P04114 | 0 | 1      | 596.3419 | 1191.677 | 2.02  | 0.00121  | 0        |
| P04114 | 0 | 0.9487 | 639.9927 | 1917.963 | 6.7   | 0.00428  | 19.18038 |
| P04114 | 0 | 1      | 631.0175 | 1891.038 | 3.39  | 0.00213  | 76.19498 |
| P04114 | 0 | 0.8958 | 673.3828 | 1345.758 | 2.05  | 0.00138  | 4.090156 |
| P04114 | 0 | 1      | 449.2577 | 1345.759 | 2.24  | 0.00101  | 30.16427 |
| P04114 | 0 | 0.7143 | 435.9387 | 1305.802 | 2.75  | 0.0012   | 8.807224 |
| P04114 | 0 | 0.8454 | 653.4045 | 1305.802 | 2.91  | 0.0019   | 29.94927 |
| P04114 | 0 | 0.6809 | 435.9389 | 1305.802 | 3.25  | 0.00141  | 15.37336 |
| P04114 | 0 | 0.9574 | 550.3106 | 1648.917 | 3.92  | 0.00215  | 31.4659  |
| P04114 | 0 | 0.6056 | 653.4054 | 1305.804 | 4.21  | 0.00275  | 48.72275 |
| P04114 | 0 | 0.8704 | 587.3279 | 1759.969 | 3.79  | 0.00222  | 20.13526 |
| P04114 | 0 | 1      | 440.7473 | 1759.968 | 2.92  | 0.00128  | 44.98894 |
| P04114 | 0 | 1      | 624.0187 | 1870.042 | 5.56  | 0.00347  | 10.91581 |
| P04114 | 0 | 0.8462 | 424.5693 | 1271.693 | 1.97  | 0.00083  | 10.99942 |
| P04114 | 0 | 0.8333 | 636.3508 | 1271.694 | 2.84  | 0.00181  | 6.333439 |
| P04114 | 0 | 0.871  | 598.6691 | 1793.993 | 4.43  | 0.00265  | 17.94276 |
| P04114 | 0 | 1      | 544.9708 | 1632.898 | 2.52  | 0.00137  | 46.553   |
| P04114 | 0 | 0.8679 | 713.8829 | 1426.759 | 1.2   | 0.00086  | 5.914031 |
| P04114 | 0 | 0.9091 | 408.98   | 1632.898 | 2.55  | 0.00104  | 6.54188  |
| P04114 | 0 | 0.8667 | 386.2091 | 1156.613 | 1.43  | 0.00055  | 2.983732 |
| P04114 | 0 | 0.7222 | 386.2089 | 1156.612 | 1.03  | 0.0004   | 0        |
| P04114 | 1 | 1      | 496.6307 | 1487.877 | 3.07  | 0.00152  | 27.34733 |
| P04114 | 0 | 0.9873 | 760.3953 | 2279.171 | 2.95  | 0.00224  | 4.200677 |
| P04114 | 0 | 0.9851 | 610.3635 | 1829.076 | 1.3   | 0.00079  | 7.89661  |
| P04114 | 0 | 1      | 436.2236 | 1306.656 | 1.76  | 0.00077  | 8.513081 |
| P04114 | 0 | 0.9583 | 458.0248 | 1829.078 | 2.23  | 0.00102  | 6.325736 |
| P04114 | 1 | 1      | 504.044  | 2013.154 | 0.81  | 0.00041  | 13.48341 |
| P04114 | 0 | 1      | 619.8549 | 1238.703 | 3.44  | 0.00213  | 0        |
| P04114 | 0 | 1      | 425.4966 | 1698.964 | 4.36  | 0.00185  | 15.14044 |
| P04114 | 0 | 1      | 458.0247 | 1829.077 | 1.9   | 0.00087  | 29.18206 |
| P04114 | 1 | 0.8689 | 809.4819 | 1617.957 | 2.46  | 0.00199  | 6.531079 |
| P04114 | 1 | 0.9595 | 539.9903 | 1617.956 | 2.3   | 0.00124  | 9.001056 |
| P04114 | 1 | 0.9831 | 539.9904 | 1617.957 | 2.41  | 0.0013   | 0        |
| P04114 | 0 | 1      | 610.3646 | 1829.079 | 3.2   | 0.00195  | 14.39931 |

|        |   |        |          |          |       |          |          |
|--------|---|--------|----------|----------|-------|----------|----------|
| P04114 | 1 | 0.8333 | 379.7365 | 1515.924 | 1.63  | 0.00062  | 8.929523 |
| P04114 | 0 | 1      | 566.9913 | 1698.959 | 1.46  | 0.00082  | 9.002501 |
| P04114 | 0 | 1      | 566.9924 | 1698.963 | 3.29  | 0.00186  | 12.35811 |
| P04114 | 0 | 1      | 610.3641 | 1829.078 | 2.4   | 0.00147  | 2.496487 |
| P04114 | 0 | 0.9846 | 881.001  | 1760.995 | 1.89  | 0.00167  | 33.71863 |
| P04114 | 0 | 0.9375 | 643.3617 | 1285.716 | 2.16  | 0.00139  | 3.883469 |
| P04114 | 0 | 1      | 429.2428 | 1285.714 | 0.47  | 0.0002   | 5.591251 |
| P04114 | 0 | 1      | 429.2422 | 1285.712 | -1.1  | -0.00047 | 4.216781 |
| P04114 | 0 | 1      | 389.9582 | 1556.811 | 1.15  | 0.00045  | 5.762279 |
| P04114 | 0 | 1      | 519.6086 | 1556.811 | 1.39  | 0.00072  | 21.18047 |
| P04114 | 0 | 0.7895 | 389.9584 | 1556.812 | 1.86  | 0.00072  | 30.3497  |
| P04114 | 0 | 0.931  | 563.3434 | 1688.016 | 4.27  | 0.0024   | 12.26031 |
| P04114 | 0 | 1      | 519.6086 | 1556.811 | 1.39  | 0.00072  | 24.63093 |
| P04114 | 0 | 0.8205 | 562.3298 | 1684.975 | 2.11  | 0.00118  | 33.1318  |
| P04114 | 0 | 0.9412 | 509.6253 | 1526.861 | 2.85  | 0.00145  | 8.345437 |
| P04114 | 0 | 1      | 489.614  | 1466.827 | 1.93  | 0.00095  | 27.09693 |
| P04114 | 0 | 0.9804 | 389.9584 | 1556.812 | 1.86  | 0.00072  | 7.009489 |
| P04114 | 0 | 1      | 519.6083 | 1556.81  | 0.81  | 0.00042  | 21.66059 |
| P04114 | 0 | 1      | 389.9585 | 1556.812 | 1.93  | 0.00075  | 5.231515 |
| P04114 | 1 | 1      | 778.0864 | 2332.245 | 1.07  | 0.00083  | 12.5846  |
| P04114 | 1 | 1      | 727.0456 | 2179.122 | 1.76  | 0.00128  | 8.178112 |
| P04114 | 0 | 0.9483 | 408.9796 | 1632.897 | 1.8   | 0.00073  | 2.958793 |
| P04114 | 1 | 1      | 545.5361 | 2179.123 | 1.97  | 0.00108  | 48.91193 |
| P04114 | 0 | 0.9455 | 408.9798 | 1632.897 | 2.1   | 0.00086  | 8.520015 |
| P04114 | 0 | 0.8769 | 544.9705 | 1632.897 | 1.96  | 0.00106  | 4.175641 |
| P04114 | 0 | 0.8939 | 408.9798 | 1632.897 | 2.25  | 0.00092  | 2.026433 |
| P04114 | 0 | 0.9828 | 408.9801 | 1632.899 | 2.92  | 0.00119  | 0        |
| P04114 | 0 | 1      | 713.6856 | 2139.042 | 2.11  | 0.0015   | 3.288271 |
| P04114 | 0 | 1      | 652.3825 | 1955.133 | 1.27  | 0.00083  | 8.768548 |
| P04114 | 0 | 1      | 652.3817 | 1955.131 | 0.15  | 0.00009  | 7.621233 |
| P04114 | 0 | 1      | 978.0712 | 1955.135 | 2.49  | 0.00244  | 5.949591 |
| P04114 | 1 | 1      | 727.0458 | 2179.123 | 2.09  | 0.00152  | 5.67016  |
| P04114 | 0 | 0.9296 | 408.98   | 1632.898 | 2.77  | 0.00113  | 0        |
| P04114 | 1 | 1      | 545.5359 | 2179.122 | 1.53  | 0.00083  | 14.62965 |
| P04114 | 0 | 0.8043 | 517.9525 | 1551.843 | 1.32  | 0.00068  | 14.2568  |
| P04114 | 0 | 1      | 548.3088 | 1642.912 | 2.52  | 0.00138  | 43.39756 |
| P04114 | 0 | 0.9429 | 548.3082 | 1642.91  | 1.4   | 0.00077  | 19.71157 |
| P04114 | 0 | 0.8519 | 517.9527 | 1551.844 | 1.68  | 0.00087  | 10.19203 |
| P04114 | 0 | 0.9762 | 776.4258 | 1551.844 | 2.16  | 0.00167  | 5.909917 |
| P04114 | 0 | 0.775  | 517.9534 | 1551.846 | 3.09  | 0.0016   | 23.72988 |
| P04114 | 0 | 0.8101 | 653.4041 | 1305.801 | 2.16  | 0.00141  | 38.96466 |
| P04114 | 1 | 0.6667 | 494.0317 | 1973.105 | 6.39  | 0.00315  | 46.87059 |
| P04114 | 0 | 0.96   | 726.8959 | 1452.785 | -0.62 | -0.00045 | 16.091   |
| P04114 | 0 | 1      | 885.4732 | 2654.405 | 0.86  | 0.00076  | 33.80442 |
| P04114 | 1 | 1      | 431.494  | 1722.954 | 0.75  | 0.00032  | 13.90142 |
| P04114 | 1 | 0.8636 | 483.5366 | 1931.125 | 3.59  | 0.00173  | 36.22338 |
| P04114 | 0 | 1      | 484.2576 | 1450.758 | 1.6   | 0.00077  | 27.59557 |
| P04114 | 0 | 1      | 484.2579 | 1450.759 | 2.23  | 0.00108  | 3.419087 |
| P04114 | 0 | 0.8478 | 381.8851 | 1143.641 | 1.44  | 0.00055  | 5.363652 |
| P04114 | 0 | 0.8654 | 381.8853 | 1143.641 | 2     | 0.00076  | 4.556586 |
| P04114 | 0 | 0.9565 | 945.5362 | 1890.065 | 4.04  | 0.00382  | 6.96443  |
| P04114 | 0 | 0.9403 | 630.692  | 1890.062 | 2.13  | 0.00134  | 10.12971 |

|        |   |        |          |          |       |          |          |
|--------|---|--------|----------|----------|-------|----------|----------|
| P04114 | 0 | 0.9623 | 566.3161 | 1696.934 | 2.16  | 0.00122  | 8.412881 |
| P04114 | 0 | 0.9153 | 671.3865 | 2012.145 | 1.49  | 0.001    | 3.607776 |
| P04114 | 0 | 0.9375 | 778.4688 | 1555.93  | 0.91  | 0.00071  | 3.638077 |
| P04114 | 0 | 0.8824 | 778.4694 | 1555.932 | 1.78  | 0.00138  | 7.476841 |
| P04114 | 0 | 0.8254 | 519.3152 | 1555.931 | 1.41  | 0.00073  | 5.91614  |
| P04114 | 0 | 0.9655 | 671.3854 | 2012.142 | -0.15 | -0.0001  | 4.702208 |
| P04114 | 0 | 0.9167 | 1006.577 | 2012.147 | 2.5   | 0.00251  | 0        |
| P04114 | 0 | 0.9437 | 720.7217 | 2160.15  | 2.06  | 0.00149  | 10.2127  |
| P04114 | 0 | 0.9077 | 720.7244 | 2160.159 | 5.79  | 0.00417  | 11.03343 |
| P04114 | 0 | 0.8413 | 595.3588 | 1189.71  | 3.47  | 0.00207  | 22.21321 |
| P04114 | 0 | 0.4318 | 655.0149 | 1963.03  | 3.59  | 0.00235  | 32.08146 |
| P04114 | 0 | 0.7179 | 533.3072 | 1597.907 | 1.93  | 0.00103  | 38.52685 |
| P04114 | 0 | 0.8448 | 813.963  | 1626.919 | 3.63  | 0.00295  | 13.15825 |
| P04114 | 0 | 0.8793 | 542.9766 | 1626.915 | 1.48  | 0.0008   | 8.905892 |
| P04114 | 0 | 0.8684 | 813.9615 | 1626.916 | 1.83  | 0.00149  | 5.554574 |
| P04114 | 0 | 0.963  | 542.9769 | 1626.916 | 2.04  | 0.00111  | 16.62893 |
| P04114 | 0 | 0.9535 | 780.4491 | 1559.891 | 1.69  | 0.00132  | 4.984789 |
| P04114 | 0 | 0.94   | 520.6346 | 1559.889 | 0.58  | 0.0003   | 6.763074 |
| P04114 | 0 | 0.7436 | 533.3071 | 1597.907 | 1.7   | 0.00091  | 8.366426 |
| P04114 | 0 | 0.9545 | 780.4496 | 1559.892 | 2.31  | 0.0018   | 6.224965 |
| P04114 | 0 | 0.8983 | 520.6354 | 1559.892 | 2.23  | 0.00116  | 10.14761 |
| P04114 | 0 | 0.8592 | 533.307  | 1597.906 | 1.47  | 0.00078  | 19.34507 |
| P04114 | 0 | 0.973  | 510.9523 | 1530.842 | 1.08  | 0.00055  | 18.78366 |
| P04114 | 0 | 0.9149 | 681.9167 | 1362.826 | 1.91  | 0.0013   | 36.35106 |
| P04114 | 0 | 0.2051 | 731.7229 | 2193.154 | 2.01  | 0.00147  | 4.467676 |
| P04114 | 0 | 0.9167 | 681.917  | 1362.827 | 2.35  | 0.0016   | 6.684518 |
| P04114 | 0 | 1      | 864.45   | 2591.335 | 2.21  | 0.0019   | 15.50795 |
| P04114 | 0 | 1      | 640.6694 | 1919.994 | 4.86  | 0.00311  | 23.15222 |
| P04114 | 0 | 0.9885 | 960.4981 | 1919.989 | 2.35  | 0.00226  | 3.749805 |
| P04114 | 0 | 1      | 636.3137 | 1906.927 | 2.74  | 0.00174  | 9.12881  |
| P04114 | 0 | 0.92   | 953.9672 | 1906.927 | 2.98  | 0.00284  | 6.30678  |
| P04114 | 0 | 0.9194 | 640.6671 | 1919.987 | 1.14  | 0.00073  | 5.123522 |
| P04114 | 0 | 0.9804 | 636.3136 | 1906.926 | 2.55  | 0.00162  | 4.215791 |
| P04114 | 0 | 0.9412 | 509.625  | 1526.86  | 2.31  | 0.00117  | 22.15171 |
| P04114 | 0 | 1      | 733.9171 | 1466.827 | 1.63  | 0.0012   | 10.91737 |
| P04114 | 0 | 0.8103 | 434.2433 | 1300.715 | 1.7   | 0.00074  | 0        |
| P04114 | 0 | 0.9841 | 434.2428 | 1300.714 | 0.58  | 0.00025  | 4.837309 |
| P04114 | 0 | 0.8525 | 650.8615 | 1300.716 | 2.11  | 0.00137  | 5.013338 |
| P04114 | 0 | 0.9841 | 434.2434 | 1300.716 | 2.13  | 0.00092  | 2.068902 |
| P04114 | 0 | 0.8125 | 652.3801 | 1303.753 | 2.28  | 0.00149  | 22.2399  |
| P04114 | 0 | 0.8197 | 636.3507 | 1271.694 | 2.65  | 0.00168  | 13.77838 |
| P04114 | 0 | 0.8163 | 553.3215 | 1105.636 | 2.1   | 0.00116  | 100      |
| P04114 | 0 | 0.7213 | 592.3464 | 1775.025 | 4.48  | 0.00265  | 21.15675 |
| P04114 | 0 | 0.9231 | 444.5111 | 1775.022 | 3.24  | 0.00144  | 14.91415 |
| P04114 | 0 | 0.6383 | 553.3217 | 1105.636 | 2.54  | 0.0014   | 10.48274 |
| P04114 | 0 | 0.9524 | 444.5114 | 1775.024 | 3.93  | 0.00174  | 35.04399 |
| P04114 | 0 | 1      | 436.2229 | 1306.654 | 0.22  | 0.0001   | 24.99941 |
| P04114 | 0 | 0.9718 | 444.5109 | 1775.022 | 2.96  | 0.00131  | 24.08275 |
| P04114 | 0 | 1      | 509.6255 | 1526.862 | 3.33  | 0.00169  | 37.81144 |
| P04114 | 0 | 0.8261 | 489.6133 | 1466.825 | 0.43  | 0.00021  | 39.5967  |
| P04114 | 0 | 0.9804 | 408.9789 | 1632.894 | -0.07 | -0.00003 | 50.33401 |
| P04114 | 0 | 0.9556 | 408.9794 | 1632.896 | 1.12  | 0.00046  | 0        |



|        |   |        |          |          |       |          |          |
|--------|---|--------|----------|----------|-------|----------|----------|
| P04114 | 0 | 0.5676 | 567.6376 | 1700.898 | 1.76  | 0.001    | 0        |
| P04114 | 0 | 0.973  | 552.2963 | 1103.585 | 3.57  | 0.00197  | 0        |
| P04114 | 0 | 0.9231 | 548.3088 | 1642.912 | 2.63  | 0.00144  | 23.13322 |
| P04114 | 0 | 0.6    | 616.8793 | 1232.751 | 4.98  | 0.00307  | 13.23632 |
| P04114 | 0 | 0.7347 | 434.2436 | 1300.716 | 2.55  | 0.00111  | 0        |
| P04114 | 0 | 0.6452 | 548.3094 | 1642.914 | 3.63  | 0.00199  | 47.60517 |
| P04114 | 0 | 1      | 544.9698 | 1632.895 | 0.61  | 0.00033  | 29.77523 |
| P04114 | 0 | 0.9556 | 1018.062 | 2035.116 | 2.9   | 0.00295  | 1.110583 |
| P04114 | 0 | 0.8654 | 679.0435 | 2035.116 | 2.74  | 0.00186  | 4.767134 |
| P04114 | 0 | 0.9672 | 978.0712 | 1955.135 | 2.49  | 0.00244  | 7.043578 |
| P04114 | 0 | 1      | 652.3825 | 1955.133 | 1.27  | 0.00083  | 7.669722 |
| P04114 | 0 | 0.6667 | 739.7089 | 2217.112 | 2.53  | 0.00187  | 6.887114 |
| P04114 | 0 | 1      | 990.186  | 2968.543 | 1.68  | 0.00166  | 1.265898 |
| P04114 | 0 | 1      | 885.4752 | 2654.411 | 3.06  | 0.00271  | 10.83279 |
| P04114 | 0 | 0.8947 | 766.9329 | 1532.858 | 1.43  | 0.0011   | 21.28372 |
| P04114 | 0 | 0.8767 | 766.9331 | 1532.859 | 1.75  | 0.00134  | 100      |
| P04114 | 0 | 0.8846 | 766.9333 | 1532.859 | 1.99  | 0.00152  | 2.278606 |
| P04114 | 1 | 0.9286 | 661.3771 | 2642.487 | 2.34  | 0.00154  | 24.58482 |
| P04114 | 0 | 0.9753 | 726.3913 | 2177.159 | 2.07  | 0.0015   | 4.326257 |
| P04114 | 1 | 0.931  | 881.4991 | 2642.483 | 0.82  | 0.00072  | 38.10486 |
| P04114 | 1 | 1      | 881.4999 | 2642.485 | 1.79  | 0.00158  | 5.298659 |
| P04114 | 1 | 0.9231 | 661.3764 | 2642.484 | 1.23  | 0.00081  | 4.992674 |
| P04114 | 0 | 0.8873 | 766.9341 | 1532.861 | 3.02  | 0.00232  | 10.58554 |
| P04114 | 0 | 0.8235 | 511.6248 | 1532.86  | 2.32  | 0.00118  | 9.111108 |
| P04114 | 0 | 1      | 990.1854 | 2968.542 | 1.06  | 0.00105  | 3.258094 |
| P04114 | 1 | 0.9615 | 688.1147 | 2749.437 | -1.09 | -0.00075 | 21.76972 |
| P04114 | 0 | 0.9878 | 664.3563 | 2654.403 | 0.16  | 0.00011  | 17.53648 |
| P04114 | 0 | 1      | 946.0019 | 1890.997 | 1.9   | 0.00179  | 0.81828  |
| P04114 | 0 | 0.9872 | 631.004  | 1890.997 | 2.34  | 0.00148  | 2.842151 |
| P04114 | 0 | 1      | 1018.053 | 2035.1   | 2.24  | 0.00228  | 0        |
| P04114 | 0 | 0.7755 | 653.3458 | 1958.023 | 3.98  | 0.0026   | 7.281023 |
| P04114 | 0 | 1      | 664.358  | 2654.41  | 2.83  | 0.00188  | 5.125243 |
| P04114 | 0 | 1      | 990.1862 | 2968.544 | 1.86  | 0.00184  | 3.054319 |
| P04114 | 0 | 0.8696 | 739.7086 | 2217.111 | 2.12  | 0.00156  | 6.029101 |
| P04114 | 0 | 1      | 990.1868 | 2968.546 | 2.48  | 0.00245  | 2.412564 |
| P04114 | 0 | 0.9394 | 679.0427 | 2035.114 | 1.66  | 0.00113  | 6.690235 |
| P04114 | 0 | 0.961  | 739.7089 | 2217.112 | 2.53  | 0.00187  | 6.297403 |
| P04114 | 0 | 1      | 885.4745 | 2654.409 | 2.3   | 0.00204  | 6.865523 |
| P04114 | 0 | 1      | 781.1198 | 2341.345 | 3.39  | 0.00265  | 10.12054 |
| P04114 | 0 | 1      | 798.9486 | 1596.89  | 1.42  | 0.00113  | 7.018042 |
| P04114 | 0 | 0.9    | 532.9681 | 1596.89  | 1.45  | 0.00077  | 9.043949 |
| P04114 | 0 | 0      | 679.0385 | 2035.101 | 2.86  | 0.00194  | 3.180454 |
| P04114 | 0 | 0.7969 | 668.3933 | 1335.779 | 2.34  | 0.00157  | 23.95877 |
| P04114 | 0 | 1      | 997.5424 | 1994.078 | 4.58  | 0.00456  | 6.783185 |
| P04114 | 0 | 1      | 665.3634 | 1994.076 | 3.62  | 0.00241  | 5.099755 |
| P04114 | 0 | 0.9825 | 648.0007 | 1941.987 | 4.04  | 0.00261  | 20.39226 |
| P04114 | 0 | 1      | 876.468  | 2627.389 | 3.66  | 0.0032   | 4.093039 |
| P04114 | 0 | 0.9275 | 609.3458 | 1826.023 | 4.37  | 0.00266  | 8.175531 |
| P04114 | 0 | 1      | 649.3659 | 1946.083 | 1.8   | 0.00117  | 57.68742 |
| P04114 | 0 | 0.9661 | 697.3496 | 2786.376 | 1.47  | 0.00102  | 4.691191 |
| P04114 | 0 | 0.7619 | 860.0028 | 1718.998 | 3.06  | 0.00263  | 6.921578 |
| P04114 | 0 | 0.871  | 573.6707 | 1718.997 | 2.52  | 0.00144  | 9.282678 |

|        |   |        |          |          |       |          |          |
|--------|---|--------|----------|----------|-------|----------|----------|
| P04114 | 0 | 0.8689 | 559.0013 | 1674.989 | 0.77  | 0.00043  | 8.829419 |
| P04114 | 0 | 0.7624 | 837.9992 | 1674.991 | 1.87  | 0.00157  | 9.554386 |
| P04114 | 0 | 0.8393 | 559.0024 | 1674.993 | 2.85  | 0.00159  | 8.097444 |
| P04114 | 0 | 0.9518 | 973.5458 | 1946.084 | 2.43  | 0.00237  | 6.359791 |
| P04114 | 0 | 0.8961 | 649.3652 | 1946.081 | 0.76  | 0.00049  | 8.948442 |
| P04114 | 0 |        | 634.6584 | 1901.961 | 2.57  | 0.00163  | 9.278855 |
| P04114 | 1 | 0      | 634.6584 | 1901.961 | 8.98  | 0.00569  | 9.278855 |
| P04114 | 0 | 0.8293 | 559.002  | 1674.991 | 2.08  | 0.00116  | 19.47608 |
| P04114 | 0 | 0.9333 | 649.3657 | 1946.083 | 1.52  | 0.00098  | 5.197229 |
| P04114 | 0 | 0.8367 | 509.5968 | 1526.776 | 1.92  | 0.00098  | 5.553577 |
| P04114 | 0 | 1      | 763.892  | 1526.777 | 2.53  | 0.00193  | 7.115397 |
| P04114 | 0 | 1      | 818.3889 | 2453.152 | 2.49  | 0.00203  | 5.508376 |
| P04114 | 0 | 0.9412 | 714.3754 | 1427.743 | 1.8   | 0.00128  | 5.961722 |
| P04114 | 0 | 1      | 766.6821 | 2298.032 | 1.73  | 0.00132  | 3.830698 |
| P04114 | 0 | 0.9605 | 660.8481 | 1320.689 | 1     | 0.00066  | 3.41485  |
| P04114 | 1 | 0.75   | 489.6361 | 1466.894 | 2.28  | 0.00112  | 11.27147 |
| P04114 | 1 | 1      | 744.4418 | 1487.876 | 2.32  | 0.00173  | 0        |
| P04114 | 0 | 1      | 1171.174 | 2341.34  | 1.47  | 0.00172  | 0        |
| P04114 | 1 | 1      | 496.6309 | 1487.878 | 3.62  | 0.0018   | 13.93522 |
| P04114 | 0 | 1      | 781.1181 | 2341.34  | 1.2   | 0.00094  | 3.618087 |
| P04114 | 1 | 1      | 448.5964 | 1343.775 | 2.98  | 0.00133  | 28.67429 |
| P04114 | 1 | 1      | 448.5964 | 1343.775 | 2.98  | 0.00133  | 28.67429 |
| P04114 | 1 | 1      | 531.6339 | 1592.887 | 1.62  | 0.00086  | 15.81919 |
| P04114 | 0 | 1      | 924.5021 | 2771.492 | 3.64  | 0.00336  | 5.623271 |
| P04114 | 0 | 1      | 693.6268 | 2771.485 | 1.26  | 0.00087  | 3.825375 |
| P04114 | 0 | 1      | 779.423  | 2336.255 | 2.44  | 0.0019   | 74.60046 |
| P04114 | 0 | 1      | 731.5827 | 2923.309 | 0.91  | 0.00067  | 25.40523 |
| P04114 | 0 | 1      | 975.1092 | 2923.313 | 2.3   | 0.00224  | 29.14009 |
| P04114 | 0 | 0.2333 | 969.7773 | 2907.317 | 2.03  | 0.00197  | 3.722632 |
| P04114 | 0 | 0.1346 | 969.7779 | 2907.319 | 2.66  | 0.00258  | 4.022875 |
| P04114 | 0 | 0.6607 | 624.3495 | 1247.692 | 6.67  | 0.00416  | 7.128069 |
| P04114 | 0 | 0.9726 | 751.0908 | 2251.258 | -1.46 | -0.00109 | 16.65745 |
| P04114 | 0 | 0.7742 | 679.9194 | 1358.831 | 2.12  | 0.00144  | 100      |
| P04114 | 0 | 0.9412 | 521.978  | 1563.92  | 1.56  | 0.00082  | 7.950328 |
| P04114 | 0 | 0.898  | 453.6159 | 1358.833 | 3.37  | 0.00153  | 11.71059 |
| P04114 | 0 | 0.9273 | 785.4158 | 2354.233 | 4.13  | 0.00324  | 6.047787 |
| P04114 | 0 | 0.7674 | 679.9201 | 1358.833 | 3.2   | 0.00217  | 20.12064 |
| P04114 | 0 | 0.9574 | 570.6398 | 1709.905 | 2.15  | 0.00122  | 2.478134 |
| P04114 | 0 | 0.8596 | 613.3511 | 1225.695 | 2.66  | 0.00163  | 4.925251 |
| P04114 | 0 | 0.7656 | 613.3511 | 1225.695 | 2.56  | 0.00157  | 9.570259 |
| P04114 | 1 | 1      | 531.6342 | 1592.888 | 2.2   | 0.00117  | 14.52502 |
| P04114 | 0 | 0.975  | 495.601  | 1484.788 | 1.1   | 0.00054  | 19.16586 |
| P04114 | 0 | 0.5333 | 438.5636 | 1313.676 | 3.34  | 0.00146  | 49.12705 |
| P04114 | 1 | 0.9714 | 531.6345 | 1592.889 | 2.66  | 0.00141  | 9.830604 |
| P04114 | 1 | 1      | 796.9476 | 1592.888 | 2.05  | 0.00163  | 5.304429 |
| P04114 | 1 | 0.9571 | 531.6343 | 1592.888 | 2.43  | 0.00129  | 8.540796 |
| P04114 | 1 | 0.96   | 531.6337 | 1592.886 | 1.16  | 0.00062  | 11.44808 |
| P04114 | 0 | 0.962  | 855.4556 | 1709.904 | 1.59  | 0.00136  | 9.472838 |
| P04114 | 0 | 1      | 635.7042 | 1905.098 | 2.41  | 0.00153  | 9.50951  |
| P04114 | 0 | 1      | 713.6849 | 2139.04  | 1.17  | 0.00083  | 0.614829 |
| P04114 | 0 | 0.9231 | 492.2772 | 1474.817 | 4.51  | 0.00222  | 13.09839 |
| P04114 | 0 | 0.9167 | 635.7041 | 1905.098 | 2.22  | 0.00141  | 24.07677 |

|        |   |        |          |          |       |          |          |
|--------|---|--------|----------|----------|-------|----------|----------|
| P04114 | 0 | 1      | 713.6854 | 2139.042 | 1.85  | 0.00132  | 6.269534 |
| P04114 | 0 | 1      | 408.8998 | 1224.685 | 2.52  | 0.00103  | 43.7624  |
| P04114 | 0 | 0.7778 | 405.8976 | 1215.678 | 2.13  | 0.00086  | 46.19752 |
| P04114 | 0 | 0.8649 | 408.8997 | 1224.685 | 2.37  | 0.00097  | 11.07607 |
| P04114 | 0 | 0.6471 | 849.9897 | 1698.972 | 1.65  | 0.0014   | 3.543408 |
| P04114 | 0 | 0.6349 | 849.9908 | 1698.974 | 3.02  | 0.00256  | 28.83894 |
| P04114 | 0 | 0.6774 | 566.9968 | 1698.976 | 3.91  | 0.00221  | 5.67531  |
| P04114 | 0 | 0.9756 | 752.8569 | 1504.706 | 1.9   | 0.00143  | 0        |
| P04114 | 0 | 0.7705 | 566.9961 | 1698.974 | 2.61  | 0.00148  | 5.134623 |
| P04114 | 0 | 0.9828 | 844.4316 | 1687.856 | 1.8   | 0.00152  | 6.408613 |
| P04114 | 0 | 0.9242 | 690.3572 | 1379.707 | 2.64  | 0.00182  | 8.18026  |
| P04114 | 0 | 0.9841 | 563.2903 | 1687.856 | 1.98  | 0.00111  | 8.797332 |
| P04114 | 0 | 1      | 680.8049 | 1360.603 | 0.76  | 0.00052  | 39.95712 |
| P04114 | 1 | 1      | 809.3804 | 2426.127 | 1.54  | 0.00125  | 2.680119 |
| P04114 | 1 | 1      | 809.3804 | 2426.127 | 1.54  | 0.00125  | 2.680119 |
| P04114 | 0 | 0.7297 | 465.2469 | 1393.726 | 4.34  | 0.00201  | 12.91025 |
| P04114 | 0 | 0.8837 | 460.5734 | 1379.706 | 1.44  | 0.00066  | 29.12798 |
| P04114 | 0 | 0.7451 | 678.8217 | 1356.636 | 1.92  | 0.0013   | 6.564109 |
| P04114 | 0 | 0.8913 | 690.3566 | 1379.706 | 1.67  | 0.00115  | 5.964774 |
| P04114 | 0 | 0.9762 | 751.0942 | 2251.268 | 3.1   | 0.00233  | 27.40767 |
| P04114 | 0 | 0.8732 | 823.0147 | 1645.022 | 2.61  | 0.00215  | 8.732327 |
| P04114 | 0 | 1      | 752.8572 | 1504.707 | 2.38  | 0.00179  | 0.540075 |
| P04114 | 0 | 1      | 502.2406 | 1504.707 | 2.48  | 0.00124  | 13.3591  |
| P04114 | 0 | 0.5    | 611.3527 | 1221.698 | 4.23  | 0.00258  | 10.08818 |
| P04114 | 0 | 0.7727 | 753.0786 | 2257.221 | -0.28 | -0.00021 | 16.30729 |
| P04114 | 0 | 0.8491 | 565.063  | 2257.23  | 3.64  | 0.00205  | 6.513497 |
| P04114 | 0 | 0.8286 | 565.0628 | 2257.229 | 3.31  | 0.00187  | 10.84741 |
| P04114 | 0 | 0.8806 | 753.0805 | 2257.227 | 2.24  | 0.00168  | 5.544158 |
| P04114 | 0 | 0.9825 | 612.0926 | 2445.349 | 2.93  | 0.00179  | 3.301458 |
| P04114 | 0 | 1      | 815.7875 | 2445.348 | 2.66  | 0.00217  | 6.388143 |
| P04114 | 0 | 0.4634 | 730.8984 | 1460.79  | 1.43  | 0.00105  | 53.46321 |
| P04114 | 0 | 0.9091 | 683.8521 | 1366.697 | 2.16  | 0.00147  | 6.45603  |
| P04114 | 0 | 1      | 922.5156 | 1844.024 | 2.87  | 0.00265  | 6.768218 |
| P04114 | 0 | 0.9815 | 456.2371 | 1366.697 | 1.99  | 0.00091  | 10.52851 |
| P04114 | 0 | 1      | 615.3461 | 1844.024 | 2.8   | 0.00172  | 4.282447 |
| P04114 | 0 | 1      | 903.4734 | 2708.406 | 4.54  | 0.0041   | 5.410085 |
| P04114 | 0 | 1      | 870.8308 | 2610.478 | 0.63  | 0.00055  | 2.62994  |
| P04114 | 0 | 1      | 774.3927 | 2321.164 | 1.03  | 0.00079  | 2.451459 |
| P04114 | 0 | 1      | 774.3935 | 2321.166 | 2.05  | 0.00159  | 5.009547 |
| P04114 | 1 | 1      | 857.4145 | 2570.229 | 1.57  | 0.00134  | 4.126486 |
| P04114 | 1 | 1      | 643.3135 | 2570.232 | 2.8   | 0.0018   | 23.2908  |
| P04114 | 0 | 1      | 774.3938 | 2321.167 | 2.45  | 0.00189  | 3.006981 |
| P04114 | 0 | 1      | 924.1262 | 2770.364 | 1.67  | 0.00154  | 0        |
| P04114 | 0 | 1      | 581.0476 | 2321.169 | 3.2   | 0.00186  | 68.08711 |
| P04114 | 0 | 0.9903 | 814.7851 | 2442.341 | 1.53  | 0.00124  | 17.68    |
| P04114 | 0 | 1      | 1243.662 | 3728.971 | 4.22  | 0.00525  | 2.97666  |
| P04114 | 0 | 1      | 932.9959 | 3728.962 | 1.68  | 0.00157  | 2.676947 |
| P04114 | 0 | 1      | 623.6594 | 1868.964 | 2.31  | 0.00144  | 35.53183 |
| P04114 | 0 | 1      | 859.1171 | 2575.337 | 0.84  | 0.00072  | 6.398591 |
| P04114 | 0 | 1      | 918.8663 | 2754.584 | 2.23  | 0.00205  | 11.35834 |
| P04114 | 0 | 1      | 1377.797 | 2754.586 | 2.97  | 0.00409  | 0        |
| P04114 | 0 | 1      | 689.4013 | 2754.583 | 1.76  | 0.00121  | 3.151737 |

|        |   |        |          |          |       |          |          |
|--------|---|--------|----------|----------|-------|----------|----------|
| P04114 | 0 | 0.973  | 787.7615 | 2361.27  | 1.96  | 0.00155  | 5.434047 |
| P04114 | 0 | 0.8788 | 542.9771 | 1626.917 | 2.38  | 0.00129  | 8.469782 |
| P04114 | 0 | 1      | 591.0743 | 2361.276 | 4.36  | 0.00257  | 9.845611 |
| P04114 | 0 | 1      | 660.0316 | 1978.08  | 1.87  | 0.00124  | 1.182949 |
| P04114 | 0 | 0.8481 | 796.4785 | 2387.421 | 1.07  | 0.00085  | 3.365304 |
| P04114 | 0 | 1      | 526.5791 | 1577.723 | 1.15  | 0.0006   | 9.925909 |
| P04114 | 0 | 1      | 789.3655 | 1577.724 | 1.81  | 0.00143  | 5.763126 |
| P04114 | 0 | 1      | 526.5798 | 1577.725 | 2.54  | 0.00134  | 4.983511 |
| P04114 | 0 | 1      | 678.3239 | 2032.957 | 4     | 0.00271  | 9.880599 |
| P04114 | 0 | 0.9875 | 989.5439 | 1978.08  | 1.97  | 0.00195  | 0.833564 |
| P04114 | 0 | 1      | 1038.602 | 3113.792 | 2.46  | 0.00255  | 0        |
| P04114 | 0 | 1      | 779.2028 | 3113.789 | 1.65  | 0.00128  | 2.874561 |
| P04114 | 0 | 0.9865 | 745.7618 | 2235.271 | 2.18  | 0.00163  | 17.97917 |
| P04114 | 0 | 1      | 650.9267 | 1300.846 | 1.45  | 0.00094  | 25.32581 |
| P04114 | 0 | 1      | 1118.138 | 2235.268 | 0.91  | 0.00101  | 5.473608 |
| P04114 | 0 | 1      | 789.3654 | 1577.723 | 1.58  | 0.00125  | 32.11262 |
| P04114 | 0 | 0.8625 | 982.0609 | 1963.114 | -1.63 | -0.0016  | 0        |
| P04114 | 0 | 1      | 727.4221 | 2180.252 | 1.7   | 0.00124  | 3.574387 |
| P04114 | 0 | 0.8    | 452.8833 | 1356.635 | 1.35  | 0.00061  | 4.046149 |
| P04114 | 1 | 1      | 857.4147 | 2570.229 | 1.78  | 0.00153  | 5.172739 |
| P04114 | 1 | 1      | 643.3137 | 2570.233 | 3.08  | 0.00198  | 5.755325 |
| P04114 | 0 | 0.9588 | 1009.583 | 2018.159 | 1.54  | 0.00155  | 4.124088 |
| P04114 | 0 | 1      | 1090.63  | 2180.252 | 1.91  | 0.00208  | 0        |
| P04114 | 0 | 1      | 1087.244 | 3259.716 | 1.93  | 0.0021   | 2.341294 |
| P04114 | 1 | 0.8837 | 459.2771 | 1375.817 | 1.54  | 0.0007   | 50.32549 |
| P04114 | 0 | 0.9753 | 727.3933 | 2180.165 | 3.46  | 0.00252  | 8.947624 |
| P04114 | 0 | 1      | 1090.584 | 2180.161 | 1.4   | 0.00153  | 0        |
| P04114 | 0 | 0.8876 | 1194.215 | 2387.423 | 1.84  | 0.0022   | 0        |
| P04114 | 0 | 1      | 401.5526 | 1202.643 | 2.95  | 0.00118  | 15.63825 |
| P04114 | 0 | 1      | 935.4973 | 2804.477 | 3.22  | 0.00301  | 7.74254  |
| P04114 | 0 | 0.878  | 434.2429 | 1300.714 | 0.93  | 0.0004   | 38.63764 |
| P04114 | 0 | 1      | 489.5869 | 1466.746 | 2.19  | 0.00107  | 3.740947 |
| P04114 | 0 | 1      | 520.6357 | 1559.892 | 2.7   | 0.0014   | 30.20678 |
| P04114 | 0 | 0.75   | 668.3933 | 1335.779 | 2.34  | 0.00157  | 13.40576 |
| P04114 | 0 | 0.6596 | 599.3337 | 1197.66  | 5.19  | 0.00311  | 18.97291 |
| P04114 | 1 | 0.9688 | 531.6335 | 1592.886 | 0.93  | 0.0005   | 9.844166 |
| P04114 | 0 | 1      | 990.1861 | 2968.544 | 1.8   | 0.00178  | 0        |
| P04114 | 0 | 0.9091 | 616.8431 | 2464.35  | 4.34  | 0.00267  | 10.355   |
| P04114 | 0 | 0.8667 | 408.98   | 1632.898 | 2.55  | 0.00104  | 0        |
| P04114 | 1 | 0.7917 | 505.9801 | 1515.926 | 2.56  | 0.00129  | 65.27874 |
| P04114 | 0 | 0.9756 | 576.2882 | 1726.85  | 7.3   | 0.0042   | 0        |
| P04114 | 0 | 0.7907 | 553.322  | 1105.637 | 3.09  | 0.00171  | 13.05781 |
| P04114 | 0 | 0.6512 | 765.9483 | 1530.889 | 2.22  | 0.0017   | 10.05616 |
| P04114 | 0 | 0.9767 | 778.9092 | 1556.811 | 1.32  | 0.00103  | 0        |
| P04114 | 0 | 0.92   | 454.947  | 1362.826 | 2.08  | 0.00094  | 11.81164 |
| P04114 | 0 | 1      | 777.9386 | 1554.87  | 1.73  | 0.00135  | 2.255943 |
| P04114 | 0 | 0.8627 | 553.3215 | 1105.636 | 2.1   | 0.00116  | 18.25963 |
| P04114 | 0 | 0.9474 | 774.3926 | 2321.163 | 0.87  | 0.00067  | 5.593933 |
| P04114 | 0 | 1      | 468.2591 | 1402.763 | -3.77 | -0.00176 | 43.77733 |
| P04114 | 0 | 1      | 706.418  | 1411.829 | 1.36  | 0.00096  | 43.27026 |
| P04114 | 0 | 1      | 468.2642 | 1870.035 | 1.96  | 0.00092  | 42.51616 |
| P04114 | 0 | 1      | 778.9088 | 1556.81  | 0.78  | 0.0006   | 4.790524 |

|        |   |        |          |          |       |          |          |
|--------|---|--------|----------|----------|-------|----------|----------|
| P04114 | 0 | 0.9231 | 572.3258 | 1143.644 | 4.57  | 0.00262  | 21.38144 |
| P04114 | 0 | 0.8857 | 690.357  | 1379.707 | 2.29  | 0.00158  | 16.29279 |
| P04114 | 1 | 1      | 515.301  | 1543.889 | 0.47  | 0.00024  | 5.1334   |
| P04114 | 0 | 0.7419 | 437.9236 | 1311.756 | 0.92  | 0.0004   | 15.40873 |
| P04114 | 0 | 0.9762 | 502.2417 | 1504.711 | 4.61  | 0.00231  | 46.9518  |
| P04114 | 0 | 0.5397 | 524.3379 | 1047.669 | 3.15  | 0.00165  | 7.991071 |
| P04114 | 0 | 0.8485 | 708.8687 | 2832.453 | 1.91  | 0.00135  | 5.477514 |
| P04114 | 0 | 1      | 519.3155 | 1555.932 | 2     | 0.00104  | 21.14695 |
| P04114 | 0 | 1      | 429.2431 | 1285.715 | 1.04  | 0.00044  | 18.06917 |
| P04114 | 0 | 1      | 872.0322 | 1743.057 | 3.7   | 0.00323  | 45.23229 |
| P04114 | 0 | 0.6061 | 559.0025 | 1674.993 | 2.96  | 0.00165  | 41.08651 |
| P04114 | 0 | 1      | 937.5317 | 1874.056 | 1.47  | 0.00138  | 7.625896 |
| P04114 | 0 | 0.8974 | 435.9377 | 1305.798 | 0.3   | 0.00013  | 0        |
| P04114 | 1 | 1      | 643.3131 | 2570.231 | 2.23  | 0.00143  | 5.152909 |
| P04114 | 0 | 0.8235 | 510.9532 | 1530.845 | 2.87  | 0.00147  | 43.13586 |
| P04114 | 0 | 0.7963 | 606.8294 | 1212.651 | 0.93  | 0.00056  | 18.81751 |
| P04114 | 0 | 0.7561 | 437.2502 | 1309.736 | 0.45  | 0.00019  | 4.857244 |
| P04114 | 0 | 0.8205 | 572.3248 | 1143.642 | 2.76  | 0.00158  | 4.332971 |
| P04114 | 0 | 0.9429 | 490.2695 | 1468.794 | 1.37  | 0.00067  | 28.98824 |
| P04114 | 0 | 0.7826 | 432.5632 | 1295.675 | 2.91  | 0.00126  | 0        |
| P04114 | 0 | 0.9444 | 631.0177 | 1891.039 | 3.68  | 0.00232  | 27.89413 |
| P04114 | 0 | 1      | 476.5859 | 1427.743 | 1.66  | 0.00079  | 7.74175  |
| P04114 | 0 | 0.549  | 584.3593 | 1167.711 | 5.47  | 0.00319  | 24.44175 |
| P04114 | 0 | 0.9048 | 589.3124 | 2354.228 | 2.08  | 0.00122  | 7.929016 |
| P04114 | 0 | 0.625  | 524.3361 | 1047.665 | -0.23 | -0.00012 | 14.24474 |
| P04114 | 0 | 0.9143 | 868.4918 | 1735.976 | 3.06  | 0.00265  | 29.69016 |
| P04114 | 0 | 0.72   | 494.8002 | 988.5932 | 2.46  | 0.00122  | 7.122599 |
| P04114 | 0 | 0.98   | 640.8657 | 1280.724 | 2.57  | 0.00165  | 29.27769 |
| P04114 | 0 | 0.9722 | 456.2364 | 1366.695 | 0.38  | 0.00017  | 13.97264 |
| P04114 | 0 | 0.8485 | 990.1873 | 2968.547 | 2.97  | 0.00294  | 0        |
| P04114 | 1 | 0.7037 | 661.3765 | 2642.484 | 1.32  | 0.00087  | 60.38203 |
| P04114 | 0 | 0.0625 | 518.9573 | 1554.857 | 1.52  | 0.00079  | 22.36887 |
| P04114 | 0 | 1      | 789.3651 | 1577.723 | 1.27  | 0.001    | 67.85486 |
| P04114 | 0 | 0.8182 | 714.3757 | 1427.744 | 2.22  | 0.00159  | 12.4142  |
| P04114 | 0 | 1      | 606.7704 | 1212.533 | 1.76  | 0.00107  | 31.30492 |
| P04114 | 0 | 0.9149 | 618.3055 | 1235.604 | 1.88  | 0.00116  | 15.64159 |
| P04114 | 1 | 0.8571 | 437.5664 | 1310.684 | 1.83  | 0.0008   | 21.10795 |
| P04114 | 0 | 0.6857 | 434.2434 | 1300.716 | 2.13  | 0.00092  | 23.97023 |
| P04114 | 0 | 0.3636 | 539.3002 | 1077.593 | 2.09  | 0.00112  | 5.928447 |
| P04114 | 0 | 0.8611 | 449.2574 | 1345.758 | 1.5   | 0.00067  | 7.368335 |
| P04114 | 0 | 0.9836 | 642.3247 | 1283.642 | 2.58  | 0.00165  | 8.905486 |
| P04114 | 0 | 0.875  | 678.8218 | 1356.636 | 2.1   | 0.00143  | 4.43446  |
| P04114 | 0 | 0.8125 | 630.693  | 1890.064 | 3.68  | 0.00232  | 20.57629 |
| P04114 | 1 | 1      | 543.9334 | 1629.786 | 1.24  | 0.00067  | 0        |
| P04114 | 1 | 1      | 398.9776 | 1592.889 | 2.57  | 0.00102  | 21.53441 |
| P04114 | 0 | 0.8545 | 596.3422 | 1191.677 | 2.43  | 0.00145  | 22.90174 |
| P04114 | 0 | 1      | 458.2147 | 1372.629 | 0.79  | 0.00036  | 35.23486 |
| P04114 | 0 | 0.7222 | 559.0021 | 1674.992 | 2.19  | 0.00122  | 0        |
| P04114 | 0 | 0.8824 | 668.3947 | 1335.782 | 4.35  | 0.00291  | 0        |
| P04114 | 0 | 0.7959 | 693.8738 | 1386.74  | 1.25  | 0.00087  | 17.36086 |
| P04114 | 1 | 0.8125 | 649.0673 | 1945.187 | 1.34  | 0.00087  | 31.59378 |
| P04114 | 0 | 0.5    | 592.3461 | 1775.024 | 3.97  | 0.00235  | 13.28751 |

|        |   |        |          |          |      |         |          |
|--------|---|--------|----------|----------|------|---------|----------|
| P04114 | 0 | 0.8333 | 408.9791 | 1632.894 | 0.38 | 0.00015 | 35.73292 |
| P04114 | 0 | 0.878  | 844.5118 | 1688.016 | 4.74 | 0.004   | 9.772592 |
| P04114 | 0 | 0.7812 | 475.6134 | 1424.826 | 1.84 | 0.00087 | 16.68567 |
| P04114 | 0 | 1      | 652.3848 | 1955.14  | 4.83 | 0.00315 | 17.38629 |
| P04114 | 0 | 1      | 519.3153 | 1555.931 | 1.53 | 0.00079 | 18.9867  |
| P04114 | 0 | 1      | 429.2436 | 1285.716 | 2.32 | 0.00099 | 43.51598 |
| P04114 | 1 | 1      | 531.6339 | 1592.887 | 1.62 | 0.00086 | 5.577809 |
| P04114 | 1 | 1      | 405.2441 | 1617.954 | 1.16 | 0.00047 | 29.13526 |
| P04114 | 0 | 0.7576 | 388.5386 | 1163.601 | 1.21 | 0.00047 | 25.29027 |
| P04114 | 0 | 0.8837 | 693.8739 | 1386.741 | 1.43 | 0.00099 | 28.97383 |
| P04114 | 0 | 0.8923 | 479.2869 | 957.5665 | 2.76 | 0.00132 | 10.59847 |
| P04114 | 0 | 0.6444 | 658.9141 | 1316.821 | 5.2  | 0.00343 | 10.47006 |
| P04114 | 0 | 0.8387 | 641.0216 | 1921.05  | 4.22 | 0.0027  | 17.33551 |
| P04114 | 0 | 1      | 549.012  | 1645.022 | 2.24 | 0.00123 | 10.1757  |
| P04114 | 0 | 0.9302 | 476.586  | 1427.743 | 1.79 | 0.00085 | 26.06529 |
| P04114 | 0 | 0.8966 | 696.3746 | 2087.109 | 3.94 | 0.00274 | 12.27354 |
| P04114 | 0 | 0.5636 | 584.3486 | 1167.69  | 3.02 | 0.00177 | 35.23802 |
| P04114 | 0 | 0.7667 | 408.9797 | 1632.897 | 1.95 | 0.00079 | 0        |
| P04114 | 0 | 0.7907 | 503.8115 | 1006.616 | 2.25 | 0.00113 | 29.56282 |
| P04114 | 0 | 0.8261 | 481.2699 | 961.5325 | 1.22 | 0.00059 | 28.24526 |
| P04114 | 0 | 0.9737 | 741.874  | 1482.741 | 1.86 | 0.00138 | 5.334628 |
| P04114 | 0 | 0.9744 | 797.9594 | 1594.912 | 2.04 | 0.00163 | 7.560391 |
| P04114 | 0 | 0.8519 | 559.3023 | 1117.597 | 0.23 | 0.00013 | 3.2438   |
| P04114 | 0 | 0.9744 | 589.8195 | 1178.632 | 2.58 | 0.00152 | 16.99992 |
| P04114 | 0 | 0.6977 | 598.851  | 1196.695 | 2.4  | 0.00144 | 5.689356 |
| P04114 | 0 | 0.8158 | 413.5717 | 1238.701 | 1.78 | 0.00074 | 45.46464 |
| P04114 | 0 | 0.9375 | 504.2763 | 1510.814 | 2.71 | 0.00136 | 34.117   |
| P04114 | 0 | 0.6222 | 508.3247 | 1015.642 | 3.1  | 0.00157 | 0        |
| P04114 | 0 | 1      | 476.2578 | 1426.759 | 1.41 | 0.00067 | 17.83496 |
| P04114 | 0 | 0.8667 | 648.0002 | 1941.986 | 3.28 | 0.00213 | 7.412726 |
| P04114 | 0 | 0.8846 | 564.0787 | 2253.293 | 3.28 | 0.00185 | 9.35809  |
| P04114 | 0 | 0.6765 | 490.2697 | 1468.795 | 1.8  | 0.00088 | 10.6375  |
| P04114 | 0 | 0.7241 | 726.0536 | 2176.146 | 2.42 | 0.00176 | 0        |
| P04114 | 0 | 1      | 471.5745 | 1412.709 | 1.33 | 0.00063 | 29.49665 |
| P04114 | 0 | 1      | 610.3635 | 1829.076 | 1.4  | 0.00085 | 20.99583 |
| P04114 | 0 | 0.7586 | 388.7166 | 1551.845 | 2.3  | 0.00089 | 0        |
| P04114 | 0 | 0.7692 | 593.2959 | 1185.585 | 3.59 | 0.00213 | 16.28871 |
| P04114 | 0 | 0.6667 | 568.3062 | 1702.904 | 3.6  | 0.00204 | 9.471786 |
| P04114 | 0 | 1      | 379.1987 | 1135.581 | 1.39 | 0.00053 | 3.941931 |
| P04114 | 0 | 0.963  | 442.242  | 1324.711 | 1.09 | 0.00048 | 11.06562 |
| P04114 | 0 | 1      | 379.1989 | 1135.582 | 1.96 | 0.00074 | 18.39009 |
| P04114 | 0 | 0.9487 | 568.2955 | 1135.584 | 3.45 | 0.00196 | 11.92844 |
| P04114 | 0 | 0.4615 | 415.2477 | 1243.729 | 3.08 | 0.00127 | 53.5704  |
| P04114 | 0 | 0.8286 | 510.9526 | 1530.843 | 1.74 | 0.00089 | 31.4304  |
| P04114 | 0 | 0.9783 | 547.8032 | 1094.599 | 2.68 | 0.00147 | 0        |
| P04114 | 0 | 0.4375 | 598.669  | 1793.992 | 4.33 | 0.00259 | 9.169598 |
| P04114 | 0 | 1      | 471.5744 | 1412.709 | 1.26 | 0.0006  | 82.83998 |
| P04114 | 0 | 0.88   | 563.3138 | 1125.62  | 2.49 | 0.0014  | 2.415234 |
| P04114 | 0 | 0.55   | 671.3873 | 2012.147 | 2.76 | 0.00185 | 66.67792 |
| P04114 | 0 | 0.9211 | 424.569  | 1271.692 | 1.32 | 0.00056 | 3.705432 |
| P04114 | 0 | 0.7656 | 554.3385 | 1107.67  | 4.08 | 0.00226 | 6.78148  |
| P04114 | 0 | 0.8095 | 650.8615 | 1300.716 | 2.11 | 0.00137 | 3.730811 |

|        |   |        |          |          |      |         |          |
|--------|---|--------|----------|----------|------|---------|----------|
| P04114 | 0 | 0.6977 | 599.3345 | 1197.662 | 6.41 | 0.00384 | 0        |
| P04114 | 1 | 1      | 464.7579 | 1856.01  | 1.97 | 0.00091 | 23.24651 |
| P04114 | 0 | 0.5345 | 528.8574 | 1056.708 | 5.34 | 0.00282 | 29.44617 |
| P04114 | 0 | 0.9231 | 712.916  | 1424.825 | 1.19 | 0.00085 | 36.33414 |
| P04114 | 0 | 0.8974 | 592.6345 | 1775.889 | 3.64 | 0.00216 | 26.70787 |
| P04114 | 0 | 0.8974 | 572.3249 | 1143.643 | 2.97 | 0.0017  | 3.701596 |
| P04114 | 0 | 0.5294 | 498.6209 | 1493.848 | 1.95 | 0.00097 | 18.04885 |
| P04114 | 0 | 0.8571 | 606.8292 | 1212.651 | 0.73 | 0.00044 | 5.654098 |
| P04114 | 1 | 0.64   | 725.3915 | 2174.16  | 3.37 | 0.00244 | 20.1981  |
| P04114 | 0 | 0.963  | 667.4108 | 1333.814 | 4.55 | 0.00304 | 9.346652 |
| P04114 | 0 | 1      | 586.0907 | 2341.341 | 1.72 | 0.00101 | 4.296774 |
| P04114 | 0 | 0.3125 | 679.0392 | 2035.103 | 3.94 | 0.00267 | 38.06491 |
| P04114 | 0 | 0.975  | 589.82   | 1178.633 | 3.51 | 0.00207 | 67.9922  |
| P04114 | 0 | 0.8571 | 647.9993 | 1941.983 | 1.96 | 0.00127 | 17.42842 |
| P04114 | 0 | 0.8529 | 532.3088 | 1594.912 | 2.3  | 0.00122 | 8.794916 |
| P04114 | 1 | 0.8929 | 857.4152 | 2570.231 | 2.42 | 0.00208 | 5.513754 |
| P04114 | 0 | 0.8529 | 563.3138 | 1125.62  | 2.49 | 0.0014  | 100      |
| P04114 | 0 | 0.6829 | 462.9183 | 1386.74  | 1.38 | 0.00064 | 11.29119 |
| P04114 | 0 | 0.8636 | 647.9996 | 1941.984 | 2.34 | 0.00152 | 15.24193 |
| P04114 | 0 | 1      | 440.9013 | 1320.689 | 1.36 | 0.0006  | 16.92626 |
| P04114 | 0 | 0.8    | 693.6301 | 2771.498 | 6.01 | 0.00417 | 43.9791  |
| P04114 | 0 | 1      | 683.8517 | 1366.696 | 1.53 | 0.00105 | 17.61644 |
| P04114 | 0 | 0.7805 | 559.3042 | 1117.601 | 3.72 | 0.00208 | 18.39595 |
| P04114 | 0 | 0.7021 | 555.3033 | 1109.599 | 3.06 | 0.0017  | 27.91577 |
| P04114 | 0 | 0.775  | 472.6013 | 1415.789 | 2.12 | 0.001   | 3.065603 |
| P04114 | 0 | 0.6154 | 523.8268 | 1046.646 | 1.42 | 0.00074 | 100      |
| P04114 | 0 | 0.7    | 527.3103 | 1579.916 | 2.76 | 0.00145 | 38.10035 |
| P04114 | 0 | 0.7273 | 452.8834 | 1356.636 | 1.69 | 0.00076 | 58.14102 |
| P04114 | 1 | 0.9565 | 574.9907 | 1722.957 | 2.6  | 0.00149 | 6.556283 |
| P04114 | 1 | 0.7727 | 502.3195 | 1504.944 | 1.03 | 0.00052 | 22.05148 |
| P04114 | 1 | 1      | 577.2983 | 1729.88  | 1.25 | 0.00072 | 4.087327 |
| P04114 | 0 | 1      | 583.322  | 1165.637 | 2.83 | 0.00165 | 12.67647 |
| P04114 | 0 | 0.9815 | 487.2513 | 973.4954 | 0.52 | 0.00025 | 9.615032 |
| P04114 | 0 | 1      | 519.6096 | 1556.814 | 3.39 | 0.00176 | 43.07314 |
| P04114 | 0 | 0.8857 | 844.5092 | 1688.011 | 1.63 | 0.00138 | 22.93782 |
| P04114 | 0 | 0.8667 | 605.3206 | 1813.947 | 5.97 | 0.00361 | 62.41048 |
| P04114 | 0 | 0.9655 | 456.2378 | 1366.699 | 3.6  | 0.00164 | 32.05995 |
| P04114 | 0 | 0.6897 | 623.3543 | 1868.048 | 4.58 | 0.00285 | 41.39274 |
| P04114 | 0 | 0.8158 | 627.3582 | 1253.709 | 3.79 | 0.00237 | 11.91647 |
| P04114 | 0 | 0.8571 | 389.9578 | 1556.809 | 0.29 | 0.00011 | 8.657466 |
| P04114 | 0 | 0.8065 | 671.8374 | 1342.668 | 4.45 | 0.00299 | 24.3339  |
| P04114 | 0 | 1      | 436.2239 | 1306.657 | 2.46 | 0.00107 | 59.89769 |
| P04114 | 0 | 0.9714 | 476.2578 | 1426.759 | 1.34 | 0.00064 | 9.184903 |
| P04114 | 0 | 1      | 566.9929 | 1698.964 | 4.15 | 0.00235 | 8.691909 |
| P04114 | 0 | 1      | 449.257  | 1345.757 | 0.68 | 0.0003  | 20.25302 |
| P04114 | 0 | 1      | 496.9359 | 1488.793 | 0.96 | 0.00048 | 13.4424  |
| P04114 | 0 | 0.7632 | 568.295  | 1135.583 | 2.48 | 0.00141 | 3.606152 |
| P04114 | 0 | 0.6538 | 381.885  | 1143.641 | 1.28 | 0.00049 | 19.10435 |
| P04114 | 0 | 1      | 586.9474 | 1758.828 | 0.28 | 0.00016 | 4.946571 |
| P04114 | 1 | 0.5333 | 649.0688 | 1945.192 | 3.69 | 0.00239 | 54.63821 |
| P04114 | 0 | 0.9091 | 487.6022 | 1460.792 | 3.11 | 0.00152 | 60.62325 |
| P04114 | 0 | 0.9167 | 798.9584 | 1596.91  | 1.17 | 0.00093 | 0        |

|        |   |        |          |          |       |          |          |
|--------|---|--------|----------|----------|-------|----------|----------|
| P04114 | 0 | 0.7241 | 431.2463 | 861.4853 | 2.78  | 0.0012   | 0        |
| P04114 | 0 | 0.8125 | 578.8761 | 1156.745 | 2.38  | 0.00137  | 18.65723 |
| P04114 | 0 | 0.9062 | 741.8738 | 1482.74  | 1.61  | 0.0012   | 4.356606 |
| P04114 | 0 | 0.35   | 476.9353 | 1428.791 | 3.02  | 0.00144  | 10.94873 |
| P04114 | 0 | 0.8148 | 473.2625 | 945.5178 | 1.64  | 0.00078  |          |
| P04114 | 0 | 0.8919 | 499.2629 | 997.5185 | 0.16  | 0.00008  | 16.28428 |
| P04114 | 0 | 0.5938 | 662.8601 | 1324.713 | 2.27  | 0.00151  | 0        |
| P04114 | 0 | 0.4286 | 731.7217 | 2193.151 | 0.43  | 0.00031  | 17.52582 |
| P04114 | 0 | 1      | 798.9507 | 1596.894 | 4.17  | 0.00333  | 60.04685 |
| P04114 | 0 | 0.7895 | 742.891  | 2968.542 | 1.26  | 0.00094  | 0        |
| P04114 | 1 | 0.8611 | 491.9564 | 1473.855 | 2.82  | 0.00139  | 25.16206 |
| P04114 | 1 | 0.8611 | 491.9564 | 1473.855 | 2.82  | 0.00139  | 25.16206 |
| P04114 | 0 | 0.8077 | 720.7206 | 2160.147 | 0.62  | 0.00045  | 25.93238 |
| P04114 | 0 | 0.9565 | 547.8021 | 1094.597 | 0.67  | 0.00037  | 14.14915 |
| P04114 | 0 | 0.9412 | 552.2977 | 1103.588 | 6.11  | 0.00337  | 0        |
| P04114 | 0 | 0.5143 | 544.3123 | 1630.922 | 4.7   | 0.00256  | 62.94799 |
| P04114 | 0 | 0.6071 | 584.3499 | 1167.693 | 5.32  | 0.00311  | 29.66083 |
| P04114 | 0 | 0.5814 | 529.8646 | 1058.722 | 4.04  | 0.00214  | 13.16629 |
| P04114 | 0 | 1      | 384.5305 | 1151.577 | 1.76  | 0.00068  | 7.865205 |
| P04114 | 0 | 0.8649 | 606.3475 | 1211.688 | 0.32  | 0.0002   | 40.49014 |
| P04114 | 0 | 0.5652 | 509.5335 | 2035.112 | 0.97  | 0.00049  | 0        |
| P04114 | 0 | 0.6591 | 528.8544 | 1056.701 | -0.44 | -0.00023 | 24.29427 |
| P04114 | 0 | 0.913  | 498.2733 | 1990.071 | -1.72 | -0.00086 | 15.98617 |
| P04114 | 0 | 0.8611 | 624.3461 | 1247.685 | 1.19  | 0.00074  | 4.575662 |
| P04114 | 0 | 0.7381 | 619.8216 | 1238.636 | 3.18  | 0.00197  | 8.0049   |
| P04114 | 0 | 0.7143 | 742.8911 | 2968.543 | 1.43  | 0.00106  | 5.74543  |
| P04114 | 1 | 1      | 456.6258 | 1367.863 | 0.5   | 0.00023  | 66.83944 |
| P04114 | 0 | 0.6735 | 598.8509 | 1196.695 | 2.3   | 0.00137  | 9.345694 |
| P04114 | 0 | 0.9512 | 499.2633 | 997.5193 | 1.02  | 0.00051  | 100      |
| P04114 | 0 | 0.7692 | 490.7814 | 980.5555 | 2.26  | 0.00111  | 12.19601 |
| P04114 | 1 | 1      | 545.5355 | 2179.12  | 0.85  | 0.00046  | 32.61387 |
| P04114 | 0 | 0.3478 | 603.3401 | 1808.006 | 2.48  | 0.0015   | 4.793478 |
| P04114 | 0 | 1      | 408.9797 | 1632.897 | 2.02  | 0.00083  | 9.401805 |
| P04114 | 0 | 0.963  | 379.199  | 1135.583 | 2.36  | 0.00089  | 30.31279 |
| P04114 | 0 | 1      | 500.2723 | 999.5372 | 0.18  | 0.00009  | 21.24076 |
| P04114 | 0 | 0.8837 | 624.3478 | 1247.688 | 4.03  | 0.00251  | 12.60859 |
| P04114 | 0 | 1      | 575.627  | 1724.866 | 5.31  | 0.00305  | 7.452607 |
| P04114 | 0 | 0.3226 | 581.6907 | 1743.057 | 3.94  | 0.00229  | 25.37302 |
| P04114 | 0 | 0.3673 | 539.3005 | 1077.594 | 2.65  | 0.00143  | 0        |
| P04114 | 0 | 0.5135 | 512.7725 | 1024.538 | 1.01  | 0.00052  | 0        |
| P04114 | 0 | 0.9565 | 424.5695 | 1271.694 | 2.47  | 0.00105  | 47.45816 |
| P04114 | 0 |        | 951.4844 | 1901.962 | 3.09  | 0.00294  | 0        |
| P04114 | 0 | 0.4815 | 509.5967 | 1526.776 | 1.8   | 0.00092  | 3.944944 |
| P04114 | 1 | 0.6875 | 433.2789 | 1297.822 | 1.37  | 0.00059  | 26.54815 |
| P04114 | 0 | 1      | 389.958  | 1556.81  | 0.76  | 0.00029  | 29.78618 |
| P04114 | 0 | 0.3947 | 523.8275 | 1046.648 | 2.82  | 0.00147  | 8.292784 |
| P04114 | 0 | 0.9286 | 461.5909 | 1382.758 | 2.27  | 0.00105  | 49.00355 |
| P04114 | 0 | 0.8235 | 636.3516 | 1271.696 | 3.99  | 0.00254  | 48.80053 |
| P04114 | 0 | 1      | 566.315  | 1696.93  | 0.22  | 0.00012  | 10.78045 |
| P04114 | 0 | 0.881  | 503.812  | 1006.617 | 3.1   | 0.00156  | 66.16414 |
| P04114 | 0 | 0.92   | 733.8771 | 1466.747 | 2.66  | 0.00195  | 10.82374 |
| P04114 | 0 | 0.9091 | 384.5305 | 1151.577 | 1.84  | 0.00071  | 51.3965  |



|        |   |        |          |          |       |          |          |
|--------|---|--------|----------|----------|-------|----------|----------|
| P04114 | 0 | 0.8235 | 655.0134 | 1963.026 | 1.26  | 0.00082  | 20.16067 |
| P04114 | 0 | 0.8286 | 586.6242 | 1757.858 | 2.41  | 0.00141  | 8.220073 |
| P04114 | 1 | 1      | 537.3273 | 1609.967 | 2.89  | 0.00155  | 16.62476 |
| P04114 | 0 | 0.7381 | 406.9135 | 1218.726 | 3.58  | 0.00146  | 36.20231 |
| P04114 | 0 | 0.7619 | 532.3087 | 1594.911 | 1.96  | 0.00104  | 2.207071 |
| P04114 | 0 | 0.6923 | 456.7618 | 912.5163 | 1.57  | 0.00072  | 18.58581 |
| P04114 | 0 | 0.7333 | 487.2514 | 973.4955 | 0.59  | 0.00028  | 0        |
| P04114 | 0 | 0.9474 | 488.9186 | 1464.741 | 3.51  | 0.00171  | 27.57136 |
| P04114 | 1 | 1      | 483.5997 | 1448.785 | 1.46  | 0.0007   | 29.26477 |
| P04114 | 0 | 0.875  | 575.9712 | 1725.899 | 1.64  | 0.00095  | 15.17875 |
| P04114 | 1 | 1      | 483.5997 | 1448.785 | 1.46  | 0.0007   | 29.26477 |
| P04114 | 0 | 1      | 456.2367 | 1366.696 | 1.12  | 0.00051  | 2.481965 |
| P04114 | 0 | 0.76   | 609.3475 | 1826.028 | 7.18  | 0.00437  | 14.39218 |
| P04114 | 0 | 0.8621 | 863.9245 | 1726.842 | 2.57  | 0.00222  | 0        |
| P04114 | 0 | 0.6829 | 644.3485 | 1287.69  | 3.15  | 0.00203  | 2.884801 |
| P04114 | 0 | 1      | 484.257  | 1450.756 | 0.27  | 0.00013  | 0        |
| P04114 | 0 | 0.9655 | 448.9077 | 1344.709 | 1.01  | 0.00045  | 6.714863 |
| P04114 | 0 | 0.7917 | 537.6313 | 1610.879 | 0.78  | 0.00042  | 9.955923 |
| P04114 | 1 | 1      | 545.5356 | 2179.121 | 1.08  | 0.00059  | 57.07236 |
| P04114 | 0 | 0.6    | 652.3795 | 1303.752 | 1.35  | 0.00088  | 16.76585 |
| P04114 | 0 | 0.8333 | 913.5129 | 1826.018 | 1.94  | 0.00177  | 0        |
| P04114 | 0 | 0.5926 | 511.6245 | 1532.859 | 1.84  | 0.00094  | 3.979715 |
| P04114 | 0 | 0.8857 | 772.4589 | 1543.911 | 2.74  | 0.00212  | 23.75401 |
| P04114 | 0 | 0.9744 | 606.7705 | 1212.534 | 1.86  | 0.00113  | 7.611712 |
| P04114 | 0 | 0.6667 | 525.6348 | 1574.89  | -0.81 | -0.00043 | 62.46359 |
| P04114 | 0 | 0.9412 | 589.8203 | 1178.633 | 3.93  | 0.00231  | 17.3235  |
| P04114 | 0 | 0.9    | 424.5689 | 1271.692 | 1.03  | 0.00044  | 17.66537 |
| P04114 | 0 | 1      | 564.2968 | 1127.586 | -2.09 | -0.00118 | 12.27932 |
| P04114 | 0 | 1      | 544.9678 | 1632.889 | -2.98 | -0.00162 | 69.80656 |
| P04114 | 0 | 0.3929 | 671.8353 | 1342.663 | 1.27  | 0.00085  | 0        |
| P04114 | 0 | 0.8696 | 510.9531 | 1530.845 | 2.75  | 0.00141  | 12.49575 |
| P04114 | 0 | 1      | 379.1987 | 1135.581 | 1.39  | 0.00053  | 28.08025 |
| P04114 | 0 | 0.7222 | 445.9309 | 1335.778 | 1.53  | 0.00068  | 24.0488  |
| P04114 | 0 | 0.8824 | 640.6674 | 1919.988 | 1.62  | 0.00103  | 49.58657 |
| P04114 | 0 | 0.963  | 789.3654 | 1577.724 | 1.66  | 0.00131  | 39.02721 |
| P04114 | 0 | 0.9524 | 610.364  | 1829.077 | 2.2   | 0.00134  | 15.99836 |
| P04114 | 0 | 0.6452 | 510.9532 | 1530.845 | 2.93  | 0.0015   | 0        |
| P04114 | 0 | 0.7273 | 639.9907 | 1917.957 | 3.55  | 0.00227  | 13.02419 |
| P04114 | 0 | 1      | 712.9158 | 1424.824 | 1.02  | 0.00072  | 48.95623 |
| P04114 | 1 | 0.9375 | 692.7001 | 2076.086 | 0.07  | 0.00005  | 0        |
| P04114 | 0 | 1      | 384.5303 | 1151.576 | 1.44  | 0.00055  | 37.56325 |
| P04114 | 0 | 0.7857 | 503.8104 | 1006.614 | 0.01  | 0        | 4.539833 |
| P04114 | 0 | 1      | 787.7613 | 2361.269 | 1.73  | 0.00136  | 9.233197 |
| P04114 | 0 | 0.68   | 533.3076 | 1597.908 | 2.73  | 0.00145  | 10.16836 |
| P04114 | 1 | 0.8929 | 736.0996 | 2941.377 | 0.9   | 0.00066  | 0        |
| P04114 | 1 | 0.6429 | 403.2472 | 1609.967 | 2.58  | 0.00104  | 30.25116 |
| P04114 | 0 | 0.8462 | 668.3924 | 1335.778 | 0.97  | 0.00065  | 6.343143 |
| P04114 | 0 | 0.7857 | 465.2463 | 929.4853 | 0.41  | 0.00019  | 0        |
| P04114 | 0 | 1      | 683.8525 | 1366.698 | 2.78  | 0.0019   | 5.507437 |
| P04114 | 0 | 0.7778 | 776.4274 | 1551.848 | 4.28  | 0.00332  | 0        |
| P04114 | 0 | 1      | 680.856  | 1360.705 | 1.98  | 0.00135  | 4.593351 |
| P04114 | 0 | 0.64   | 1109.06  | 2217.113 | 2.7   | 0.00299  | 0        |

|        |   |        |          |          |       |          |          |
|--------|---|--------|----------|----------|-------|----------|----------|
| P04114 | 0 | 0.95   | 751.7687 | 2253.291 | 2.67  | 0.002    | 16.13864 |
| P04114 | 0 | 0.3333 | 443.7839 | 886.5605 | 1.66  | 0.00074  | 6.513032 |
| P04114 | 0 | 0.8857 | 679.047  | 2035.126 | 7.96  | 0.0054   | 66.55428 |
| P04114 | 0 | 0.8462 | 499.2637 | 997.5201 | 1.81  | 0.0009   | 26.86415 |
| P04114 | 0 | 0.5    | 782.4641 | 1563.921 | 2.39  | 0.00187  | 32.53048 |
| P04114 | 0 | 0.5556 | 855.4542 | 1709.901 | -0.06 | -0.00005 | 30.09697 |
| P04114 | 0 | 1      | 454.2395 | 1360.704 | 1.32  | 0.0006   | 42.21049 |
| P04114 | 0 | 0.7609 | 578.8763 | 1156.745 | 2.69  | 0.00156  | 0        |
| P04114 | 0 | 0.95   | 567.6401 | 1700.906 | 6.17  | 0.0035   | 0        |
| P04114 | 0 | 0.8684 | 499.2632 | 997.5192 | 0.9   | 0.00045  | 0        |
| P04114 | 0 | 0.8788 | 589.8195 | 1178.632 | 2.58  | 0.00152  | 34.24921 |
| P04114 | 0 | 1      | 683.8519 | 1366.697 | 1.89  | 0.00129  | 5.584842 |
| P04114 | 1 | 0.5    | 493.2609 | 1477.768 | 4.45  | 0.00219  | 0        |
| P04114 | 0 | 0.9149 | 619.8203 | 1238.633 | 1.02  | 0.00063  | 3.62824  |
| P04114 | 1 | 0.65   | 1014.548 | 3041.63  | 0.92  | 0.00093  | 5.633653 |
| P04114 | 0 | 0.8485 | 528.8129 | 1056.619 | 1.52  | 0.0008   | 12.03749 |
| P04114 | 0 | 0.9259 | 413.5711 | 1238.699 | 0.38  | 0.00016  | 26.96435 |
| P04114 | 0 | 0.8276 | 572.3242 | 1143.641 | 1.69  | 0.00097  | 7.07499  |
| P04114 | 0 | 0.9231 | 405.8975 | 1215.678 | 1.75  | 0.00071  | 42.82643 |
| P04114 | 0 | 0.8519 | 778.9095 | 1556.812 | 1.72  | 0.00134  | 0        |
| P04114 | 0 | 0.8065 | 416.5671 | 1247.687 | 2.57  | 0.00107  | 29.07967 |
| P04114 | 0 | 0.9355 | 683.8524 | 1366.697 | 2.51  | 0.00172  | 5.671254 |
| P04114 | 1 | 0.5517 | 483.6    | 1448.786 | 2.09  | 0.00101  | 9.429806 |
| P04114 | 1 | 0.5517 | 483.6    | 1448.786 | 2.09  | 0.00101  | 9.429806 |
| P04114 | 0 | 0.5556 | 381.8854 | 1143.642 | 2.32  | 0.00088  | 44.92138 |
| P04114 | 0 | 0.625  | 837.9999 | 1674.992 | 2.68  | 0.00224  | 27.47167 |
| P04114 | 0 | 0.4706 | 668.3938 | 1335.78  | 3.07  | 0.00205  | 15.5709  |
| P04114 | 0 | 0.7    | 554.3377 | 1107.668 | 2.65  | 0.00147  | 29.56052 |
| P04114 | 0 | 0.2105 | 559.0017 | 1674.991 | 1.54  | 0.00086  | 21.04757 |
| P04114 | 0 | 0.625  | 598.8518 | 1196.696 | 3.73  | 0.00223  | 8.297427 |
| P04114 | 0 | 1      | 460.574  | 1379.707 | 2.77  | 0.00127  | 5.296625 |
| P04114 | 0 | 1      | 384.5308 | 1151.578 | 2.56  | 0.00098  | 46.23136 |
| P04114 | 0 | 0.8158 | 445.9312 | 1335.779 | 2.08  | 0.00093  | 13.01136 |
| P04114 | 0 | 1      | 490.2721 | 1468.802 | 6.67  | 0.00326  | 37.78534 |
| P04114 | 0 | 1      | 456.2363 | 1366.694 | 0.32  | 0.00014  | 23.92336 |
| P04114 | 1 | 0.8    | 401.9031 | 1203.695 | 0.94  | 0.00038  | 74.92777 |
| P04114 | 0 | 1      | 379.1987 | 1135.582 | 1.47  | 0.00056  | 12.7689  |
| P04114 | 0 | 0.3548 | 435.2566 | 1303.755 | 4.08  | 0.00177  | 14.78458 |
| P04114 | 0 | 0.3333 | 671.3861 | 2012.144 | 0.94  | 0.00063  | 21.15609 |
| P04114 | 0 | 1      | 458.0238 | 1829.073 | -0.04 | -0.00002 | 37.48754 |
| P04114 | 0 | 0.7037 | 671.8359 | 1342.664 | 2.18  | 0.00146  | 5.378081 |
| P04114 | 1 | 0.6667 | 857.4135 | 2570.226 | 0.43  | 0.00037  | 22.92661 |
| P04114 | 0 | 1      | 544.9698 | 1632.895 | 0.61  | 0.00033  | 13.73358 |
| P04114 | 0 | 0.8519 | 381.2086 | 1141.611 | 0.03  | 0.00001  | 51.81804 |
| P04114 | 0 | 0.875  | 797.9578 | 1594.908 | 0.05  | 0.00004  | 0        |
| P04114 | 1 | 0.875  | 667.3571 | 2666.406 | 6.72  | 0.00448  | 25.33017 |
| P04114 | 1 | 1      | 483.6002 | 1448.786 | 2.4   | 0.00116  | 43.83767 |
| P04114 | 1 | 1      | 483.6002 | 1448.786 | 2.4   | 0.00116  | 43.83767 |
| P04114 | 0 | 1      | 623.6604 | 1868.967 | 3.98  | 0.00248  | 60.07015 |
| P04114 | 0 | 0.9231 | 484.2579 | 1450.759 | 2.17  | 0.00105  | 80.39879 |
| P04114 | 0 | 0.875  | 408.9796 | 1632.896 | 1.57  | 0.00064  | 40.50221 |
| P04114 | 0 | 1      | 576.2868 | 1726.846 | 4.96  | 0.00286  | 5.545444 |

|        |   |        |          |          |       |          |          |
|--------|---|--------|----------|----------|-------|----------|----------|
| P04114 | 0 | 0.4688 | 523.8263 | 1046.645 | 0.48  | 0.00025  | 47.28819 |
| P04114 | 0 | 0.28   | 592.3466 | 1775.025 | 4.9   | 0.0029   | 4.92606  |
| P04114 | 0 | 0.9697 | 456.2374 | 1366.698 | 2.73  | 0.00124  | 34.58175 |
| P04114 | 0 | 0.8421 | 563.3136 | 1125.62  | 2.06  | 0.00116  | 9.567071 |
| P04114 | 0 | 1      | 448.2268 | 1342.666 | 3.28  | 0.00147  | 20.17022 |
| P04114 | 0 | 0.5714 | 611.3518 | 1221.696 | 2.83  | 0.00173  | 0        |
| P04114 | 0 | 0.8077 | 416.5668 | 1247.686 | 1.99  | 0.00083  | 34.19727 |
| P04114 | 1 | 0.2222 | 658.3705 | 1973.097 | 2.38  | 0.00156  | 5.32258  |
| P04114 | 0 | 1      | 495.601  | 1484.789 | 1.16  | 0.00057  | 36.85239 |
| P04114 | 0 | 0.6667 | 503.8104 | 1006.613 | -0.05 | -0.00003 | 50.7957  |
| P04114 | 0 | 1      | 384.5307 | 1151.578 | 2.4   | 0.00092  | 16.65363 |
| P04114 | 0 | 0.7333 | 445.276  | 1333.813 | 3.95  | 0.00176  | 26.54824 |
| P04114 | 0 | 0.7027 | 563.3146 | 1125.622 | 3.9   | 0.0022   | 12.23474 |
| P04114 | 0 | 0.6429 | 503.7909 | 2012.142 | -0.06 | -0.00003 | 0        |
| P04114 | 1 | 0.5357 | 539.9907 | 1617.957 | 2.98  | 0.00161  | 18.57733 |
| P04114 | 0 | 0.9091 | 614.0441 | 2453.155 | 3.58  | 0.00219  | 11.70769 |
| P04114 | 0 | 0.8571 | 741.8737 | 1482.74  | 1.53  | 0.00113  | 5.908511 |
| P04114 | 1 | 1      | 574.9906 | 1722.957 | 2.5   | 0.00143  | 0        |
| P04114 | 0 | 0.8421 | 570.3633 | 1139.719 | 4.84  | 0.00276  | 9.484889 |
| P04114 | 0 | 0.6667 | 616.8785 | 1232.75  | 3.7   | 0.00228  | 48.82201 |
| P04114 | 1 | 0.9091 | 857.4175 | 2570.238 | 5.13  | 0.0044   | 16.86457 |
| P04114 | 0 | 0.1852 | 697.3662 | 1393.725 | 3.58  | 0.00249  | 13.03004 |
| P04114 | 0 | 1      | 429.2433 | 1285.715 | 1.61  | 0.00069  | 50.12146 |
| P04114 | 0 | 1      | 656.3823 | 1311.757 | 1.74  | 0.00114  | 24.46258 |
| P04114 | 1 | 1      | 607.2871 | 2426.127 | 1.56  | 0.00095  | 12.72344 |
| P04114 | 1 | 1      | 607.2871 | 2426.127 | 1.56  | 0.00095  | 12.72344 |
| P04114 | 0 | 0.8182 | 408.9793 | 1632.895 | 0.98  | 0.0004   | 0        |
| P04114 | 0 | 0.9412 | 639.9904 | 1917.957 | 3.17  | 0.00202  | 21.40736 |
| P04114 | 1 | 1      | 667.3552 | 2666.399 | 3.88  | 0.00258  | 0        |
| P04114 | 0 | 0.6154 | 624.3468 | 1247.686 | 2.36  | 0.00148  | 0        |
| P04114 | 0 | 0.6897 | 439.6128 | 1316.824 | 7.53  | 0.00331  | 19.38299 |
| P04114 | 0 | 0.5625 | 731.7227 | 2193.154 | 1.76  | 0.00129  | 16.50322 |
| P04114 | 0 | 0.8    | 563.3138 | 1125.62  | 2.49  | 0.0014   | 2.540552 |
| P04114 | 0 | 0.5385 | 411.5878 | 1232.749 | 2.99  | 0.00123  | 5.259064 |
| P04114 | 0 | 0.9231 | 924.5079 | 2771.509 | 9.85  | 0.0091   | 10.15452 |
| P04114 | 0 | 0.7391 | 799.4573 | 1597.907 | 2.09  | 0.00167  | 7.449416 |
| P04114 | 0 | 0.8684 | 503.8117 | 1006.616 | 2.49  | 0.00125  | 6.917277 |
| P04114 | 0 | 1      | 487.2519 | 973.4965 | 1.59  | 0.00077  | 38.9526  |
| P04114 | 0 | 0.931  | 568.2952 | 1135.583 | 2.91  | 0.00165  | 0        |
| P04114 | 0 | 1      | 990.1876 | 2968.548 | 3.28  | 0.00325  | 0        |

| Average Retention Time [min] | Ion Inject Time [min] | RT [min] | First Scan | Ions Score | Expectation Score | Percolator Score | Percolator Score |
|------------------------------|-----------------------|----------|------------|------------|-------------------|------------------|------------------|
| 136.5                        | 42.62                 | 42.7956  | 15305      | 34         | 0.011235          | 0                | 0.000676         |
| 128.4                        | 38.098                | 56.5524  | 18661      | 81         | 1.77E-07          | 0                | 1.04E-10         |
| 32.5                         | 91.42                 | 56.529   | 18651      | 94         | 8.47E-09          | 0                | 8.18E-10         |
| 153.3                        | 100                   | 56.0523  | 18469      | 40         | 0.002274          | 0                | 1.52E-06         |
| 5                            | 100                   | 32.578   | 10000      | 97         | 5.35E-09          | 0                | 1.41E-06         |
| 218                          | 60.917                | 45.2531  | 15660      | 40         | 0.003666          | 0                | 0.000843         |
| 52.2                         | 100                   | 116.2611 | 43618      | 46         | 0.000882          | 0                | 0.000708         |
| 15.6                         | 100                   | 115.7594 | 43412      | 42         | 0.001962          | 0                | 0.000598         |
| 32.3                         | 51.95                 | 118.5193 | 44604      | 93         | 1.93E-08          | 0                | 3.4E-10          |
| 19.6                         | 100                   | 42.2908  | 15115      | 27         | 0.05579           | 0.000273         | 0.002107         |
| 24.7                         | 100                   | 59.4108  | 19742      | 43         | 0.002247          | 0.000951         | 0.003631         |
| 14.6                         | 100                   | 42.8426  | 15324      | 38         | 0.00531           | 0.001576         | 0.008689         |
| 50.5                         | 100                   | 32.2894  | 9900       | 34         | 0.012222          | 0.002543         | 0.01623          |
| 3.4                          | 100                   | 101.6235 | 37492      | 28         | 0.058758          | 0.00337          | 0.0228           |
| 12.3                         | 100                   | 60.6426  | 24327      | 34         | 0.013326          | 0.004192         | 0.03059          |
| 5.3                          | 100                   | 98.9441  | 37101      | 49         | 0.000584          | 0                | 0.000667         |
| 10.1                         | 100                   | 113.316  | 41150      | 62         | 2.86E-05          | 0                | 2.45E-06         |
| 45                           | 58.884                | 113.8198 | 41372      | 76         | 9.65E-07          | 0                | 2.66E-08         |
| 2.9                          | 100                   | 97.0732  | 36701      | 78         | 7.96E-07          | 0                | 6.46E-08         |
| 5.8                          | 100                   | 96.5653  | 36497      | 53         | 0.000234          | 0                | 3.22E-06         |
| 28.4                         | 100                   | 55.7724  | 20330      | 79         | 3.37E-07          | 0                | 2.07E-08         |
| 23.6                         | 100                   | 55.2665  | 20128      | 72         | 1.67E-06          | 0                | 1.07E-08         |
| 10.9                         | 100                   | 98.4331  | 36902      | 32         | 0.02995           | 0.000868         | 0.003363         |
| 2.5                          | 100                   | 97.9273  | 36713      | 32         | 0.030294          | 0.001114         | 0.006369         |
| 29.4                         | 100                   | 55.3231  | 20150      | 12         | 1.406851          | 0.002376         | 0.01427          |
| 11                           | 100                   | 33.9012  | 11471      | 39         | 0.0029            | 0.002543         | 0.01566          |
| 12.4                         | 100                   | 33.396   | 11283      | 37         | 0.004419          | 0.00337          | 0.02421          |
| 41.7                         | 100                   | 33.4702  | 11309      | 38         | 0.003502          | 0.003892         | 0.02834          |
| 6.6                          | 100                   | 54.7591  | 19919      | 14         | 0.94506           | 0.006926         | 0.05025          |
| 7.2                          | 100                   | 108.7074 | 39281      | 21         | 0.379501          | 0.008559         | 0.06472          |
| 24.5                         | 100                   | 52.3207  | 18952      | 50         | 0.000152          | 0                | 7.24E-05         |
| 30.3                         | 100                   | 52.3185  | 18951      | 55         | 5.07E-05          | 0                | 5.12E-05         |
| 13.6                         | 100                   | 51.8075  | 18740      | 23         | 0.057439          | 0                | 0.001086         |
| 26.4                         | 53.888                | 66.088   | 24503      | 77         | 4.22E-07          | 0                | 2.12E-06         |
| 22                           | 100                   | 66.1143  | 24515      | 48         | 0.000322          | 0                | 3.98E-05         |
| 8.7                          | 100                   | 65.6044  | 24306      | 43         | 0.001071          | 0                | 0.000133         |
| 3.9                          | 100                   | 52.3586  | 18920      | 28         | 0.019184          | 0.000407         | 0.002133         |
| 107.9                        | 100                   | 15.9979  | 4815       | 55         | 0.000106          | 0.000525         | 0.002384         |
| 0.8                          | 100                   | 61.5478  | 22368      | 51         | 6.4E-05           | 0.000758         | 0.002779         |
| 365.3                        | 88.265                | 15.9601  | 4796       | 36         | 0.008971          | 0.001022         | 0.005551         |
| 210.7                        | 100                   | 15.8502  | 5016       | 55         | 0.000111          | 0.002012         | 0.01077          |
| 5                            | 100                   | 62.0585  | 22569      | 41         | 0.000623          | 0.002079         | 0.01135          |
| 3.3                          | 100                   | 51.8548  | 18726      | 25         | 0.041198          | 0.002777         | 0.01707          |
| 320.3                        | 6.942                 | 15.8454  | 5013       | 36         | 0.008892          | 0.003178         | 0.02046          |
| 20.4                         | 100                   | 58.6704  | 21487      | 12         | 0.876437          | 0.003533         | 0.0245           |
| 51.7                         | 100                   | 16.0092  | 4409       | 25         | 0.092658          | 0.007572         | 0.05456          |
| 9.7                          | 100                   | 97.3901  | 36844      | 71         | 1.05E-06          | 0                | 1.58E-08         |
| 5.7                          | 100                   | 96.8811  | 36621      | 90         | 1.51E-08          | 0                | 1.64E-11         |
| 234.2                        | 43.252                | 141.1588 | 54528      | 75         | 8.74E-07          | 0                | 2.96E-08         |
| 0.5                          | 100                   | 96.3715  | 36415      | 16         | 0.356223          | 0.006721         | 0.04914          |
| 1.3                          | 100                   | 119.0966 | 44520      | 40         | 0.003033          | 0                | 0.000181         |

|       |     |          |       |    |          |          |          |
|-------|-----|----------|-------|----|----------|----------|----------|
| 24.4  | 100 | 67.7032  | 23257 | 23 | 0.228884 | 0        | 2.61E-05 |
| 0     | 100 | 120.1973 | 45830 | 56 | 2.38E-05 | 0        | 4.15E-05 |
| 35.2  | 100 | 74.2911  | 27597 | 31 | 0.031801 | 0.000758 | 0.003183 |
| 17.2  | 100 | 50.0373  | 19768 | 42 | 0.001075 | 0.000951 | 0.00395  |
| 9.7   | 100 | 50.3476  | 16394 | 38 | 0.002314 | 0        | 0.000785 |
| 28.4  | 100 | 50.5343  | 16469 | 64 | 5.49E-06 | 0        | 1.03E-07 |
| 22.6  | 100 | 50.0302  | 16273 | 35 | 0.005165 | 0        | 0.00048  |
| 18.5  | 100 | 64.4695  | 21909 | 39 | 0.002796 | 0        | 0.000194 |
| 48.2  | 100 | 63.1396  | 22912 | 56 | 8.97E-05 | 0        | 0.00127  |
| 18.1  | 100 | 35.3676  | 13546 | 28 | 0.078746 | 0        | 0.000248 |
| 36.4  | 100 | 34.8637  | 13324 | 37 | 0.00876  | 0        | 2.93E-05 |
| 32.8  | 100 | 30.6673  | 10306 | 47 | 0.000365 | 0.000951 | 0.0039   |
| 17.2  | 100 | 58.0573  | 23222 | 23 | 0.182746 | 0.002012 | 0.01027  |
| 2.2   | 100 | 140.7153 | 54672 | 89 | 1.64E-08 | 0        | 9.37E-09 |
| 18    | 100 | 23.9633  | 8807  | 55 | 9.91E-05 | 0.000273 | 0.001952 |
| 20.7  | 100 | 53.9178  | 17735 | 33 | 0.026087 | 0        | 0.001006 |
| 12.4  | 100 | 58.7243  | 19640 | 48 | 0.00061  | 0        | 1.54E-05 |
| 21.5  | 100 | 64.9608  | 23657 | 33 | 0.018417 | 0        | 0.001432 |
| 20.4  | 100 | 64.4565  | 23453 | 13 | 2.092643 | 0.009514 | 0.07636  |
| 12.9  | 100 | 118.0987 | 44172 | 57 | 8.33E-05 | 0        | 3.55E-08 |
| 50.5  | 100 | 17.6964  | 5330  | 24 | 0.118408 | 0.002012 | 0.01044  |
| 47.3  | 100 | 77.4056  | 27322 | 52 | 9.06E-05 | 0        | 0.000235 |
| 66.1  | 100 | 48.415   | 19061 | 42 | 0.000957 | 0.001114 | 0.006252 |
| 10.8  | 100 | 62.7018  | 21210 | 19 | 0.236561 | 0.002376 | 0.01486  |
| 6.8   | 100 | 76.9582  | 27123 | 29 | 0.016286 | 0.002843 | 0.01833  |
| 18.3  | 100 | 76.9048  | 27099 | 20 | 0.130298 | 0.00337  | 0.02383  |
| 45.8  | 100 | 66.4856  | 24477 | 31 | 0.031461 | 0        | 0.000925 |
| 3.1   | 100 | 96.9058  | 34495 | 37 | 0.006925 | 0        | 0.00052  |
| 13    | 100 | 95.3582  | 35986 | 32 | 0.024652 | 0        | 3.74E-05 |
| 2.5   | 100 | 94.8476  | 35772 | 35 | 0.011273 | 0        | 0.00103  |
| 24.7  | 100 | 65.9842  | 24284 | 35 | 0.014679 | 0.00065  | 0.002668 |
| 3.3   | 100 | 97.4106  | 34694 | 25 | 0.124149 | 0.001022 | 0.005181 |
| 1.4   | 100 | 95.8668  | 36207 | 23 | 0.198384 | 0.001576 | 0.008698 |
| 7     | 100 | 66.7057  | 24562 | 19 | 0.504421 | 0.002079 | 0.01178  |
| 23.9  | 100 | 18.1952  | 5870  | 67 | 5.62E-06 | 0        | 5.06E-05 |
| 25.2  | 100 | 29.1246  | 10949 | 23 | 0.188989 | 0.000758 | 0.003223 |
| 11.8  | 100 | 16.5014  | 5332  | 55 | 0.000101 | 0.000758 | 0.003191 |
| 259.1 | 100 | 17.4153  | 5494  | 18 | 0.266877 | 0        | 7.56E-05 |
| 13.7  | 100 | 99.1469  | 37626 | 65 | 1.01E-05 | 0        | 0.00013  |
| 112.7 | 100 | 55.4456  | 22108 | 20 | 0.353985 | 0        | 0.00047  |
| 5.9   | 100 | 58.0737  | 23229 | 17 | 0.833107 | 0.001758 | 0.009141 |
| 129.2 | 100 | 38.2793  | 13140 | 42 | 0.000552 | 0.002543 | 0.0159   |
| 36.1  | 100 | 51.8987  | 16992 | 31 | 0.019621 | 0        | 0.000838 |
| 17.3  | 100 | 77.5913  | 27404 | 49 | 0.000383 | 0        | 0.000169 |
| 4.3   | 100 | 93.5095  | 34038 | 34 | 0.010931 | 0        | 0.00031  |
| 2.5   | 100 | 121.2913 | 47378 | 34 | 0.015099 | 0.001022 | 0.004976 |
| 18.6  | 100 | 88.6122  | 31184 | 40 | 0.004639 | 0        | 0.000697 |
| 10.4  | 100 | 89.0056  | 33863 | 25 | 0.092403 | 0.001114 | 0.006149 |
| 73    | 100 | 18.662   | 6086  | 19 | 0.577141 | 0        | 0.000657 |
| 0     | 100 | 109.3979 | 44927 | 22 | 0.255757 | 0.002079 | 0.01141  |
| 4.9   | 100 | 108.901  | 40498 | 33 | 0.018575 | 0.000758 | 0.002977 |
| 0.9   | 100 | 119.4946 | 45023 | 22 | 0.149549 | 0.001022 | 0.005158 |

|       |        |          |       |    |          |          |          |
|-------|--------|----------|-------|----|----------|----------|----------|
| 40.6  | 100    | 61.6062  | 22285 | 34 | 0.017153 | 0.000273 | 0.002083 |
| 4.7   | 100    | 102.3394 | 36650 | 42 | 0.002614 | 0.001945 | 0.01004  |
| 32.8  | 100    | 34.5593  | 10611 | 33 | 0.011432 | 0        | 0.001138 |
| 15    | 100    | 68.8122  | 25409 | 29 | 0.036753 | 0.003674 | 0.0266   |
| 16.1  | 100    | 62.5352  | 23029 | 27 | 0.042997 | 0        | 0.001487 |
| 17.3  | 100    | 42.1698  | 13276 | 31 | 0.018206 | 0.003892 | 0.0283   |
| 16.1  | 100    | 62.5352  | 23029 | 27 | 0.042997 | 0        | 0.001487 |
| 17.3  | 100    | 42.1698  | 13276 | 31 | 0.018206 | 0.003892 | 0.0283   |
| 49.8  | 100    | 44.1063  | 15188 | 51 | 0.000218 | 0.001022 | 0.005549 |
| 12.8  | 100    | 74.6121  | 27734 | 37 | 0.006367 | 0.001576 | 0.008165 |
| 6.2   | 100    | 103.3135 | 39989 | 30 | 0.025771 | 0.001114 | 0.006055 |
| 15.6  | 100    | 27.5498  | 8286  | 14 | 1.613118 | 0.001758 | 0.009665 |
| 16.2  | 100    | 62.636   | 22694 | 7  | 7.252389 | 0.005792 | 0.04291  |
| 27.1  | 100    | 26.4444  | 9863  | 1  | 29.2611  | 0.007836 | 0.0569   |
| 49.7  | 100    | 35.2718  | 13501 | 26 | 0.114444 | 0.001022 | 0.005355 |
| 0.4   | 100    | 86.507   | 32194 | 17 | 0.8561   | 0.002079 | 0.01143  |
| 1.4   | 100    | 93.8515  | 33306 | 42 | 0.003124 | 0.000525 | 0.002379 |
| 68.5  | 100    | 52.9124  | 19247 | 24 | 0.127393 | 0.004192 | 0.0301   |
| 62.6  | 100    | 23.5803  | 8060  | 36 | 0.009112 | 0.001022 | 0.004895 |
| 38.2  | 100    | 46.3238  | 16141 | 25 | 0.051912 | 0.002543 | 0.01612  |
| 30.3  | 100    | 65.1075  | 22174 | 44 | 8.29E-05 | 0.000868 | 0.003471 |
| 22.1  | 100    | 27.8216  | 9655  | 21 | 0.323192 | 0.003533 | 0.02459  |
| 439.9 | 100    | 17.362   | 5783  | 22 | 0.057444 | 0.001022 | 0.004849 |
| 0     | 100    | 120.7123 | 45555 | 18 | 0.049604 | 0.002843 | 0.01837  |
| 46.1  | 100    | 17.2032  | 5135  | 19 | 0.413638 | 0.001022 | 0.004812 |
| 23.9  | 100    | 88.3487  | 31925 | 16 | 1.003451 | 0.002843 | 0.01872  |
| 14    | 100    | 60.4298  | 22140 | 44 | 0.000925 | 0.001114 | 0.006175 |
| 36.4  | 100    | 53.0498  | 21093 | 37 | 0.0076   | 0.00337  | 0.0242   |
| 14.8  | 100    | 62.9565  | 23114 | 27 | 0.067586 | 0.002315 | 0.01333  |
| 31.7  | 100    | 57.0989  | 19001 | 18 | 0.590237 | 0.003674 | 0.0256   |
| 4     | 100    | 89.2679  | 33309 | 50 | 0.000365 | 0        | 0.000292 |
| 10.2  | 100    | 89.2582  | 33305 | 50 | 0.000341 | 0        | 0.000111 |
| 32.7  | 9.911  | 88.2598  | 32920 | 73 | 1.7E-06  | 0        | 2.7E-07  |
| 8.1   | 100    | 88.7576  | 33115 | 51 | 0.000317 | 0        | 0.000428 |
| 40.2  | 5.167  | 88.254   | 32917 | 75 | 1.1E-06  | 0        | 2.22E-07 |
| 28.1  | 100    | 51.1727  | 16713 | 21 | 0.342394 | 0        | 0.00128  |
| 5.1   | 100    | 83.0203  | 30853 | 28 | 0.057249 | 0        | 0.000185 |
| 18.4  | 100    | 87.7462  | 32706 | 56 | 9.99E-05 | 0        | 4.01E-06 |
| 31.3  | 1.662  | 68.5723  | 25304 | 68 | 6.49E-06 | 0        | 6.19E-07 |
| 29.6  | 58.28  | 68.6392  | 25332 | 91 | 2.73E-08 | 0        | 6.23E-10 |
| 9.4   | 100    | 68.7342  | 25374 | 44 | 0.001599 | 0        | 0.001198 |
| 6.3   | 100    | 69.5855  | 25716 | 41 | 0.002806 | 0        | 0.000797 |
| 25.7  | 100    | 69.0773  | 25515 | 65 | 1.33E-05 | 0        | 1.53E-07 |
| 49.3  | 43.781 | 63.7359  | 23418 | 46 | 0.000922 | 0        | 0.00108  |
| 46.9  | 100    | 57.6402  | 19219 | 34 | 0.014759 | 0        | 0.000641 |
| 4.1   | 100    | 64.3835  | 23662 | 57 | 5.05E-05 | 0        | 0.000423 |
| 77.6  | 17.356 | 64.239   | 23609 | 51 | 0.00025  | 0        | 0.001127 |
| 3.8   | 100    | 82.1746  | 30536 | 30 | 0.04226  | 0        | 0.00028  |
| 9.3   | 100    | 82.0119  | 30476 | 25 | 0.125128 | 0        | 6.58E-05 |
| 9.6   | 100    | 81.6708  | 30348 | 27 | 0.084903 | 0        | 0.000145 |
| 8.3   | 100    | 81.5063  | 30286 | 27 | 0.073003 | 0        | 0.000182 |
| 10.1  | 100    | 82.514   | 30664 | 34 | 0.014137 | 0        | 2.67E-05 |

|       |        |          |       |    |          |   |          |
|-------|--------|----------|-------|----|----------|---|----------|
| 7.6   | 100    | 55.121   | 18211 | 48 | 0.000783 | 0 | 8.29E-05 |
| 0.6   | 100    | 55.1236  | 18212 | 34 | 0.017944 | 0 | 0.000289 |
| 17.6  | 100    | 75.0969  | 27841 | 27 | 0.082775 | 0 | 0.000712 |
| 4.5   | 100    | 38.4029  | 11951 | 61 | 2.45E-05 | 0 | 0.001428 |
| 6.9   | 100    | 24.343   | 7906  | 58 | 3.01E-05 | 0 | 0.000982 |
| 21.8  | 100    | 39.3984  | 12297 | 41 | 0.002884 | 0 | 0.00143  |
| 38.4  | 100    | 23.0512  | 7414  | 40 | 0.003138 | 0 | 0.00093  |
| 14.7  | 100    | 29.8338  | 9961  | 67 | 7.81E-06 | 0 | 0.000122 |
| 33.1  | 100    | 35.4424  | 12046 | 38 | 0.004392 | 0 | 0.000236 |
| 11.5  | 100    | 45.9594  | 14674 | 54 | 0.00016  | 0 | 6.7E-05  |
| 11.5  | 100    | 45.9594  | 14674 | 54 | 0.00016  | 0 | 6.7E-05  |
| 20.2  | 100    | 46.4667  | 14867 | 65 | 1.17E-05 | 0 | 2.29E-05 |
| 20.2  | 100    | 46.4667  | 14867 | 65 | 1.17E-05 | 0 | 2.29E-05 |
| 9     | 100    | 119.4643 | 44656 | 57 | 4E-05    | 0 | 1.08E-05 |
| 32    | 100    | 15.1434  | 4255  | 30 | 0.034953 | 0 | 0.00116  |
| 36.4  | 100    | 14.8534  | 4147  | 33 | 0.015535 | 0 | 0.001312 |
| 1.8   | 100    | 132.4457 | 49151 | 43 | 0.001043 | 0 | 9.68E-05 |
| 23.5  | 35.082 | 131.9448 | 48972 | 53 | 9.9E-05  | 0 | 1.48E-08 |
| 0     | 100    | 130.3155 | 48421 | 29 | 0.015557 | 0 | 0.000455 |
| 6.1   | 100    | 108.8976 | 44732 | 63 | 2.03E-05 | 0 | 1.88E-05 |
| 5.3   | 100    | 108.7816 | 44688 | 54 | 0.000178 | 0 | 3.86E-05 |
| 5.9   | 100    | 109.2922 | 44884 | 57 | 8.93E-05 | 0 | 2.75E-05 |
| 8.2   | 100    | 109.4081 | 44932 | 79 | 5.35E-07 | 0 | 3.08E-08 |
| 20.6  | 100    | 110.3017 | 45328 | 41 | 0.003104 | 0 | 0.000444 |
| 5.4   | 100    | 109.9185 | 45151 | 70 | 4.03E-06 | 0 | 1.31E-06 |
| 24.3  | 100    | 109.7951 | 45095 | 54 | 0.000186 | 0 | 5.1E-06  |
| 3.2   | 100    | 102.4165 | 42057 | 42 | 0.002612 | 0 | 0.000411 |
| 6.8   | 12.361 | 101.9126 | 41863 | 67 | 8.38E-06 | 0 | 5.19E-06 |
| 7     | 85.262 | 101.5135 | 41704 | 65 | 1.24E-05 | 0 | 2.72E-06 |
| 9.3   | 3.983  | 101.4086 | 41662 | 75 | 1.23E-06 | 0 | 7.99E-07 |
| 22.2  | 100    | 43.3436  | 15514 | 35 | 0.009998 | 0 | 0.001017 |
| 17.6  | 100    | 43.1498  | 15436 | 77 | 7.29E-07 | 0 | 9.73E-07 |
| 23.1  | 100    | 59.1549  | 19798 | 37 | 0.007404 | 0 | 0.000254 |
| 84.1  | 4.349  | 60.1605  | 22041 | 51 | 0.000238 | 0 | 0.001305 |
| 135   | 11.242 | 58.1428  | 19424 | 48 | 0.000632 | 0 | 0.000298 |
| 53.1  | 100    | 58.645   | 19610 | 37 | 0.008415 | 0 | 0.000548 |
| 21.2  | 100    | 51.4576  | 18688 | 35 | 0.01139  | 0 | 0.000856 |
| 148.9 | 4.277  | 60.4305  | 20307 | 59 | 3.53E-05 | 0 | 4.71E-05 |
| 47    | 57.244 | 60.4589  | 20318 | 85 | 7.56E-08 | 0 | 7.63E-07 |
| 21.2  | 100    | 51.4576  | 18688 | 35 | 0.01139  | 0 | 0.000856 |
| 85.2  | 100    | 59.9213  | 20092 | 45 | 0.000782 | 0 | 8.08E-05 |
| 2.5   | 100    | 69.1152  | 23831 | 52 | 0.000221 | 0 | 7.54E-05 |
| 12    | 100    | 69.7858  | 24100 | 46 | 0.000868 | 0 | 1.33E-06 |
| 35.6  | 100    | 14.6067  | 4178  | 47 | 0.000648 | 0 | 0.001371 |
| 114.9 | 100    | 14.5851  | 4169  | 45 | 0.000957 | 0 | 0.000106 |
| 3.7   | 100    | 140.6238 | 57525 | 85 | 1.46E-07 | 0 | 1.47E-09 |
| 101.4 | 100    | 52.8074  | 17229 | 41 | 0.003715 | 0 | 6.14E-05 |
| 9.5   | 100    | 65.7441  | 22168 | 47 | 0.000832 | 0 | 4.49E-07 |
| 2.6   | 29.228 | 62.7411  | 20996 | 57 | 8.74E-05 | 0 | 1.45E-08 |
| 4.3   | 86.101 | 62.261   | 20810 | 56 | 0.000126 | 0 | 1.91E-09 |
| 2.2   | 17.673 | 62.2385  | 20800 | 55 | 0.000158 | 0 | 1.11E-08 |
| 2.4   | 100    | 62.7664  | 21006 | 62 | 2.99E-05 | 0 | 1.03E-09 |

|      |        |          |       |     |          |   |          |
|------|--------|----------|-------|-----|----------|---|----------|
| 61   | 7.949  | 64.4971  | 21692 | 42  | 0.001872 | 0 | 5.86E-07 |
| 61.6 | 100    | 64.4036  | 21656 | 28  | 0.054819 | 0 | 0.000122 |
| 0.3  | 100    | 63.2738  | 21208 | 48  | 0.000685 | 0 | 8.97E-06 |
| 13.8 | 100    | 63.2467  | 21197 | 47  | 0.000872 | 0 | 2.33E-07 |
| 91.8 | 36.913 | 27.7745  | 8361  | 61  | 2.54E-05 | 0 | 6.43E-05 |
| 90.4 | 36.259 | 27.4831  | 8265  | 44  | 0.001116 | 0 | 0.00114  |
| 81.8 | 2.313  | 27.2708  | 8193  | 58  | 5.54E-05 | 0 | 0.000169 |
| 67.9 | 94.792 | 140.8249 | 55398 | 83  | 2.48E-07 | 0 | 9.42E-10 |
| 31.9 | 71.454 | 140.8228 | 55397 | 70  | 4.35E-06 | 0 | 1.64E-09 |
| 40.3 | 100    | 140.767  | 55367 | 111 | 2.67E-10 | 0 | 3.12E-14 |
| 9.8  | 21.931 | 140.764  | 55365 | 102 | 2.03E-09 | 0 | 1.67E-11 |
| 23.9 | 100    | 15.2336  | 4161  | 35  | 0.009444 | 0 | 0.000265 |
| 10.5 | 100    | 36.2184  | 11223 | 29  | 0.031967 | 0 | 0.00066  |
| 70.2 | 25.217 | 97.3035  | 34650 | 65  | 9.96E-06 | 0 | 0.000237 |
| 7.9  | 100    | 89.41    | 31524 | 69  | 4.46E-06 | 0 | 5.63E-06 |
| 81.6 | 45.86  | 88.9059  | 31315 | 18  | 0.50117  | 0 | 4.47E-05 |
| 6.2  | 100    | 93.3989  | 33136 | 50  | 0.0003   | 0 | 0.000187 |
| 1.3  | 100    | 107.5418 | 38773 | 39  | 0.004615 | 0 | 0.000353 |
| 71   | 21.14  | 88.7522  | 31248 | 46  | 0.000913 | 0 | 1.78E-06 |
| 57   | 19.079 | 88.7406  | 31242 | 73  | 1.68E-06 | 0 | 2.44E-08 |
| 0.4  | 100    | 122.3613 | 44907 | 33  | 0.017932 | 0 | 2.38E-05 |
| 0    | 100    | 77.461   | 26758 | 37  | 0.007894 | 0 | 4.22E-05 |
| 40.3 | 98.337 | 77.2925  | 26698 | 30  | 0.036704 | 0 | 1.26E-06 |
| 0.9  | 100    | 76.9597  | 26568 | 58  | 6.44E-05 | 0 | 3.17E-08 |
| 2.7  | 33.561 | 76.7827  | 26502 | 52  | 0.000249 | 0 | 8.53E-09 |
| 7.2  | 100    | 122.012  | 44770 | 67  | 8.67E-06 | 0 | 5.41E-08 |
| 14   | 100    | 121.5059 | 44563 | 67  | 7.16E-06 | 0 | 2.01E-10 |
| 4.7  | 100    | 77.7994  | 26890 | 50  | 0.000388 | 0 | 2.32E-06 |
| 17.6 | 57.805 | 121.8591 | 44705 | 46  | 0.001035 | 0 | 1.31E-10 |
| 83.3 | 100    | 73.2864  | 25097 | 33  | 0.010149 | 0 | 0.000423 |
| 9.7  | 100    | 73.2003  | 25063 | 51  | 0.000313 | 0 | 1.03E-06 |
| 84.8 | 11.655 | 73.1817  | 25056 | 51  | 0.000162 | 0 | 6.44E-05 |
| 20.2 | 19.658 | 73.025   | 24994 | 68  | 6.72E-06 | 0 | 1.35E-09 |
| 17.5 | 100    | 72.7833  | 24890 | 44  | 0.000971 | 0 | 0.00061  |
| 11.8 | 100    | 72.6715  | 24849 | 38  | 0.003195 | 0 | 0.000192 |
| 12.6 | 100    | 72.6106  | 24825 | 20  | 0.460521 | 0 | 0.000975 |
| 1.6  | 100    | 72.5145  | 24786 | 32  | 0.029017 | 0 | 0.00059  |
| 22.8 | 100    | 73.338   | 25120 | 38  | 0.005127 | 0 | 0.000671 |
| 19.2 | 100    | 73.3893  | 25141 | 47  | 0.000678 | 0 | 9.08E-05 |
| 40.2 | 100    | 74.6971  | 25688 | 50  | 0.00034  | 0 | 0.000697 |
| 22.4 | 100    | 73.8929  | 25361 | 61  | 2.7E-05  | 0 | 9.8E-06  |
| 45.3 | 25.014 | 73.8421  | 25338 | 56  | 7.89E-05 | 0 | 2.84E-05 |
| 77.7 | 58.628 | 73.6921  | 25276 | 47  | 0.000343 | 0 | 3.77E-05 |
| 7    | 100    | 73.5365  | 25204 | 59  | 5.98E-05 | 0 | 7.6E-07  |
| 9.5  | 45.774 | 121.3538 | 44498 | 70  | 3.79E-06 | 0 | 2.63E-12 |
| 20.7 | 100    | 88.3457  | 31076 | 56  | 7.92E-05 | 0 | 2.72E-05 |
| 3.3  | 100    | 88.3158  | 31063 | 70  | 3.05E-06 | 0 | 1E-05    |
| 24.6 | 8.961  | 88.2375  | 31032 | 69  | 4.47E-06 | 0 | 1.08E-07 |
| 39.7 | 83.577 | 87.8389  | 30874 | 60  | 3.73E-05 | 0 | 4.86E-07 |
| 4.1  | 100    | 87.8135  | 30864 | 53  | 0.000175 | 0 | 8.15E-05 |
| 40.5 | 8.926  | 87.734   | 30829 | 70  | 3.92E-06 | 0 | 6.55E-08 |
| 12   | 100    | 87.2234  | 30620 | 51  | 0.00029  | 0 | 3.88E-05 |



|      |        |          |       |     |          |   |          |
|------|--------|----------|-------|-----|----------|---|----------|
| 7.5  | 100    | 82.965   | 28922 | 49  | 0.000515 | 0 | 0.000184 |
| 28.1 | 21.104 | 141.219  | 52667 | 103 | 1.97E-09 | 0 | 9.18E-13 |
| 24.5 | 25.115 | 141.2199 | 52668 | 85  | 1.22E-07 | 0 | 1.58E-09 |
| 12.1 | 100    | 72.5705  | 26651 | 58  | 4.53E-05 | 0 | 7.12E-05 |
| 5.4  | 100    | 72.2036  | 26489 | 54  | 0.00016  | 0 | 3.66E-06 |
| 29.3 | 100    | 15.0902  | 4200  | 32  | 0.018934 | 0 | 0.001467 |
| 18   | 100    | 72.4209  | 26587 | 47  | 0.000512 | 0 | 7.6E-06  |
| 41   | 39.332 | 75.7345  | 27926 | 79  | 3.14E-07 | 0 | 1.13E-06 |
| 31.8 | 60.692 | 74.1639  | 27309 | 47  | 0.000772 | 0 | 0.00134  |
| 53.1 | 39.716 | 73.6574  | 27114 | 48  | 0.000568 | 0 | 0.000118 |
| 15   | 100    | 140.8376 | 52461 | 100 | 3.33E-09 | 0 | 1.18E-11 |
| 14.4 | 100    | 140.8508 | 52467 | 100 | 3.17E-09 | 0 | 3.54E-12 |
| 16.6 | 17.954 | 140.8955 | 52491 | 114 | 1.51E-10 | 0 | 1.99E-13 |
| 13.7 | 53.167 | 140.782  | 52430 | 96  | 1.05E-08 | 0 | 4.32E-15 |
| 10.7 | 100    | 140.812  | 52447 | 61  | 2.6E-05  | 0 | 4.74E-08 |
| 9.6  | 100    | 141.0493 | 52573 | 86  | 7.35E-08 | 0 | 9.94E-09 |
| 29.4 | 100    | 83.6126  | 31114 | 39  | 0.004503 | 0 | 9.91E-05 |
| 4.2  | 100    | 140.9086 | 52498 | 112 | 2.33E-10 | 0 | 2.96E-10 |
| 14.1 | 100    | 140.9108 | 52499 | 93  | 1.81E-08 | 0 | 7.19E-10 |
| 5.9  | 89.163 | 69.8371  | 25536 | 49  | 0.000269 | 0 | 4.38E-05 |
| 20   | 100    | 54.2322  | 19276 | 41  | 0.003124 | 0 | 2.12E-05 |
| 15.6 | 100    | 54.7428  | 19488 | 39  | 0.004963 | 0 | 0.00039  |
| 20.2 | 100    | 26.8409  | 8079  | 42  | 0.00194  | 0 | 0.000292 |
| 50.9 | 100    | 49.2511  | 17310 | 63  | 1.29E-05 | 0 | 0.001194 |
| 61.4 | 86.948 | 51.2579  | 18094 | 88  | 7.3E-08  | 0 | 1.62E-09 |
| 37.9 | 5.492  | 50.751   | 17900 | 98  | 6.7E-09  | 0 | 1.06E-09 |
| 32   | 6.798  | 50.4588  | 17783 | 81  | 3.37E-07 | 0 | 7.65E-09 |
| 31.7 | 100    | 15.5013  | 4347  | 45  | 0.001132 | 0 | 0.00056  |
| 12.9 | 100    | 66.7191  | 24310 | 30  | 0.03666  | 0 | 0.000186 |
| 13.3 | 100    | 17.6396  | 5107  | 31  | 0.038553 | 0 | 0.000449 |
| 80   | 100    | 140.4503 | 55184 | 117 | 1.79E-11 | 0 | 4.57E-10 |
| 28.8 | 33.859 | 140.4313 | 55174 | 92  | 6.54E-09 | 0 | 3.8E-10  |
| 6.7  | 29.945 | 99.4279  | 37757 | 85  | 8.12E-08 | 0 | 1.81E-07 |
| 26.7 | 10.163 | 99.4035  | 37746 | 91  | 2.02E-08 | 0 | 1.47E-09 |
| 3.8  | 100    | 92.3529  | 34757 | 37  | 0.005719 | 0 | 0.001518 |
| 31.6 | 47.186 | 91.3458  | 34343 | 77  | 5.65E-07 | 0 | 2.11E-08 |
| 8    | 100    | 90.6739  | 34092 | 46  | 0.00076  | 0 | 5.77E-05 |
| 17.6 | 35.41  | 91.8496  | 34551 | 81  | 2.65E-07 | 0 | 8.98E-09 |
| 6    | 15.115 | 105.9902 | 40583 | 64  | 5.25E-06 | 0 | 1.72E-05 |
| 31.4 | 9.136  | 105.9557 | 40566 | 84  | 5.47E-08 | 0 | 3.26E-07 |
| 3.4  | 100    | 105.4805 | 40349 | 61  | 1.12E-05 | 0 | 3.97E-05 |
| 23.2 | 100    | 109.8544 | 40878 | 84  | 1.35E-07 | 0 | 7.11E-11 |
| 23.1 | 100    | 139.6837 | 53746 | 53  | 4.69E-05 | 0 | 4.91E-08 |
| 67.1 | 2.788  | 89.1158  | 33913 | 58  | 6.36E-05 | 0 | 6.91E-05 |
| 24.1 | 22.964 | 113.7589 | 42540 | 79  | 5.58E-07 | 0 | 1.02E-08 |
| 4.8  | 23.623 | 113.773  | 42546 | 70  | 4.57E-06 | 0 | 6.44E-07 |
| 2.5  | 100    | 96.2288  | 36939 | 36  | 0.012345 | 0 | 0.000803 |
| 20   | 92.912 | 95.72    | 36730 | 48  | 0.000681 | 0 | 0.000201 |
| 12.8 | 92.397 | 95.3405  | 36570 | 61  | 3.21E-05 | 0 | 2.74E-06 |
| 21.7 | 58.098 | 95.2157  | 36514 | 48  | 0.000715 | 0 | 6.71E-05 |
| 0.4  | 100    | 111.5192 | 41585 | 96  | 1.25E-08 | 0 | 4.37E-07 |
| 6.1  | 100    | 96.7351  | 37142 | 38  | 0.006612 | 0 | 0.000427 |

|       |        |          |       |     |          |   |          |
|-------|--------|----------|-------|-----|----------|---|----------|
| 13.7  | 100    | 94.8343  | 36346 | 49  | 0.000542 | 0 | 0.000166 |
| 0.6   | 100    | 93.0413  | 35567 | 47  | 0.000636 | 0 | 0.001342 |
| 10    | 49.412 | 94.7118  | 36292 | 44  | 0.001673 | 0 | 4.04E-05 |
| 10.5  | 100    | 94.2086  | 36078 | 42  | 0.002927 | 0 | 0.000223 |
| 172.1 | 3.96   | 140.5927 | 54187 | 66  | 4.58E-06 | 0 | 3.7E-06  |
| 2.4   | 100    | 141.2964 | 54969 | 31  | 0.037107 | 0 | 0.000972 |
| 116.1 | 100    | 13.6894  | 3914  | 34  | 0.013462 | 0 | 0.000401 |
| 33.2  | 30.596 | 102.8952 | 38052 | 70  | 4.45E-06 | 0 | 3.77E-06 |
| 3.8   | 100    | 102.945  | 38072 | 45  | 0.00162  | 0 | 0.000409 |
| 0     | 100    | 134.2669 | 52336 | 83  | 1.43E-07 | 0 | 1.69E-06 |
| 50    | 88.716 | 140.3717 | 54077 | 59  | 4.14E-05 | 0 | 1.31E-10 |
| 23.1  | 100    | 106.0869 | 39346 | 31  | 0.025658 | 0 | 3.04E-05 |
| 20.4  | 24.272 | 131.8755 | 50352 | 61  | 9.79E-06 | 0 | 3.44E-06 |
| 2.4   | 100    | 131.7344 | 50295 | 29  | 0.021095 | 0 | 0.00037  |
| 14.1  | 100    | 131.6865 | 50276 | 32  | 0.010348 | 0 | 5.66E-05 |
| 2.2   | 100    | 129.1129 | 49172 | 49  | 0.000493 | 0 | 4.19E-05 |
| 35.3  | 100    | 56.0867  | 20017 | 42  | 0.002163 | 0 | 0.000466 |
| 18.3  | 100    | 55.6399  | 19839 | 83  | 1.58E-07 | 0 | 5.33E-07 |
| 115.7 | 15.021 | 55.5809  | 19816 | 53  | 0.000179 | 0 | 4.01E-05 |
| 4.9   | 100    | 129.4087 | 49306 | 93  | 1.93E-08 | 0 | 3.44E-09 |
| 10.2  | 100    | 118.6687 | 44672 | 30  | 0.024394 | 0 | 7.31E-07 |
| 31.3  | 100    | 65.8261  | 24019 | 37  | 0.007226 | 0 | 7.79E-05 |
| 1.2   | 100    | 115.5712 | 43327 | 38  | 0.008063 | 0 | 0.000513 |
| 34.3  | 41.416 | 66.3411  | 24232 | 87  | 6.31E-08 | 0 | 1.04E-06 |
| 85.1  | 3.804  | 66.3295  | 24227 | 40  | 0.003611 | 0 | 0.000572 |
| 47.9  | 67.416 | 118.6178 | 44648 | 65  | 6.55E-06 | 0 | 6.01E-10 |
| 31.4  | 100    | 66.8323  | 24445 | 42  | 0.002197 | 0 | 4.43E-05 |
| 14.8  | 100    | 69.5341  | 25561 | 41  | 0.002798 | 0 | 9.15E-05 |
| 6.9   | 100    | 102.4402 | 37855 | 61  | 3.75E-05 | 0 | 0.000131 |
| 104.4 | 100    | 70.5957  | 28621 | 51  | 0.000339 | 0 | 8.28E-05 |
| 7.5   | 100    | 44.7688  | 15971 | 51  | 0.000164 | 0 | 0.00095  |
| 32.7  | 100    | 49.5078  | 19545 | 36  | 0.010699 | 0 | 0.000364 |
| 37.5  | 100    | 51.3075  | 18517 | 47  | 0.000273 | 0 | 0.000473 |
| 67.8  | 8.102  | 50.7373  | 18286 | 46  | 0.000346 | 0 | 0.000732 |
| 28.6  | 36.117 | 141.0307 | 54449 | 57  | 5.05E-05 | 0 | 0.000335 |
| 1.2   | 93.779 | 78.7188  | 27907 | 15  | 1.441885 | 0 | 1.12E-05 |
| 48.2  | 37.822 | 48.5438  | 17432 | 48  | 0.000252 | 0 | 0.000265 |
| 53.3  | 100    | 49.0478  | 17625 | 52  | 9.6E-05  | 0 | 9.06E-05 |
| 43    | 2.841  | 44.4835  | 17360 | 50  | 0.00044  | 0 | 6.17E-05 |
| 183.8 | 3.731  | 45.7493  | 17926 | 36  | 0.0089   | 0 | 0.00031  |
| 199.1 | 100    | 45.2421  | 17691 | 25  | 0.107395 | 0 | 2.5E-05  |
| 16.7  | 100    | 70.0835  | 28396 | 52  | 0.000254 | 0 | 0.001392 |
| 69.3  | 9.763  | 50.0654  | 18030 | 55  | 5.19E-05 | 0 | 0.000517 |
| 15.3  | 100    | 86.9561  | 32052 | 56  | 3.54E-05 | 0 | 0.000238 |
| 55    | 100    | 86.4548  | 31884 | 47  | 0.000338 | 0 | 0.000453 |
| 52.8  | 100    | 85.9505  | 31714 | 46  | 0.000376 | 0 | 0.000823 |
| 19.1  | 100    | 62.8898  | 25310 | 61  | 2.43E-05 | 0 | 0.000224 |
| 22.8  | 100    | 141.5457 | 54757 | 104 | 1.13E-09 | 0 | 5.24E-11 |
| 0.8   | 94.784 | 141.5358 | 54752 | 44  | 0.000857 | 0 | 0.000107 |
| 48.6  | 5.024  | 85.4972  | 30729 | 31  | 0.027214 | 0 | 9.03E-07 |
| 40.6  | 46.488 | 85.5514  | 30753 | 36  | 0.009587 | 0 | 8.5E-07  |
| 12.4  | 100    | 86.0002  | 30941 | 29  | 0.047697 | 0 | 4.7E-06  |

|       |        |          |       |     |          |          |          |
|-------|--------|----------|-------|-----|----------|----------|----------|
| 97.7  | 68.421 | 141.3667 | 54655 | 104 | 7.86E-10 | 0        | 9.21E-13 |
| 28.2  | 28.035 | 141.365  | 54654 | 77  | 3.58E-07 | 0        | 1.59E-10 |
| 8.7   | 49.164 | 56.4759  | 22547 | 45  | 0.001395 | 0        | 9.46E-05 |
| 59.1  | 56.71  | 141.3641 | 54653 | 61  | 2.07E-05 | 0        | 2.86E-11 |
| 32.2  | 27.704 | 55.971   | 22331 | 45  | 0.001404 | 0        | 0.000263 |
| 15.4  | 100    | 57.4837  | 22988 | 40  | 0.004929 | 0        | 0.000451 |
| 12    | 100    | 56.9805  | 22763 | 47  | 0.000826 | 0        | 9.79E-05 |
| 49.4  | 100    | 141.3746 | 54659 | 80  | 2.54E-07 | 0        | 2.66E-15 |
| 66.7  | 89.696 | 54.965   | 21914 | 36  | 0.011077 | 0        | 0.000423 |
| 63.2  | 35.493 | 55.4691  | 22120 | 47  | 0.000963 | 0        | 8.63E-05 |
| 186.9 | 100    | 55.4094  | 22092 | 75  | 1.36E-06 | 0        | 1.29E-05 |
| 29    | 6.483  | 29.8773  | 11246 | 67  | 8.03E-06 | 0        | 3.55E-05 |
| 37.3  | 5.899  | 140.8143 | 54315 | 98  | 5.94E-09 | 0        | 3.78E-16 |
| 44.7  | 100    | 140.7981 | 54306 | 65  | 1.03E-05 | 0        | 1.05E-10 |
| 329   | 23.386 | 140.7637 | 54285 | 50  | 0.000276 | 0        | 0.000596 |
| 2.4   | 100    | 140.7477 | 54275 | 63  | 9.58E-06 | 0        | 0.000346 |
| 11.2  | 8.762  | 140.7857 | 54299 | 91  | 2.69E-08 | 0        | 8.89E-13 |
| 11.2  | 100    | 71.792   | 29141 | 38  | 0.004087 | 0        | 0.000235 |
| 37.9  | 100    | 39.4948  | 15245 | 33  | 0.018954 | 0        | 0.000892 |
| 359.7 | 25.892 | 140.9153 | 54380 | 144 | 1.57E-13 | 0        | 8.74E-16 |
| 26.8  | 16.464 | 140.8922 | 54365 | 80  | 6.63E-08 | 0        | 1.12E-09 |
| 75.8  | 4.214  | 140.8914 | 54364 | 77  | 1.12E-07 | 0        | 1.31E-11 |
| 2.6   | 100    | 131.3715 | 50145 | 38  | 0.001849 | 0.000141 | 0.001645 |
| 143   | 14.753 | 20.9613  | 6517  | 21  | 0.316589 | 0.000141 | 0.001624 |
| 241.2 | 100    | 15.1572  | 4420  | 25  | 0.10876  | 0.000141 | 0.001795 |
| 79.5  | 100    | 42.6934  | 15268 | 42  | 0.001954 | 0.000141 | 0.001766 |
| 180.1 | 9.349  | 12.9888  | 3512  | 35  | 0.01421  | 0.000141 | 0.001562 |
| 135.5 | 100    | 14.4527  | 4114  | 33  | 0.015796 | 0.000141 | 0.001755 |
| 5.7   | 100    | 94.3311  | 36131 | 36  | 0.012243 | 0.000141 | 0.001813 |
| 5.8   | 100    | 87.3363  | 30665 | 40  | 0.003688 | 0.000141 | 0.001617 |
| 92.4  | 9.298  | 49.5573  | 17827 | 46  | 0.00035  | 0.000273 | 0.001872 |
| 175.8 | 1.368  | 15.2833  | 4700  | 32  | 0.02222  | 0.000273 | 0.002096 |
| 0     | 100    | 126.0139 | 46381 | 33  | 0.019225 | 0.000273 | 0.001933 |
| 1.3   | 100    | 102.0194 | 41908 | 35  | 0.01246  | 0.000273 | 0.001849 |
| 123   | 6.27   | 55.4692  | 20273 | 49  | 0.000428 | 0.000273 | 0.002032 |
| 18    | 100    | 86.0611  | 30966 | 4   | 14.60519 | 0.000273 | 0.00203  |
| 12.6  | 100    | 88.8532  | 31293 | 35  | 0.010982 | 0.000525 | 0.002525 |
| 9.1   | 100    | 50.9512  | 18371 | 40  | 0.001641 | 0.000525 | 0.002376 |
| 4.4   | 100    | 92.9945  | 35547 | 38  | 0.005154 | 0.000525 | 0.002223 |
| 55.5  | 100    | 42.6591  | 15255 | 39  | 0.003971 | 0.000525 | 0.00228  |
| 35.2  | 100    | 30.184   | 11381 | 40  | 0.003689 | 0.000525 | 0.002257 |
| 10    | 100    | 80.8186  | 30321 | 38  | 0.005858 | 0.000525 | 0.00234  |
| 9.5   | 100    | 92.486   | 35325 | 28  | 0.047809 | 0.00065  | 0.002717 |
| 56.2  | 100    | 25.9858  | 8517  | 22  | 0.173172 | 0.00065  | 0.002753 |
| 1.5   | 100    | 130.2483 | 50770 | 32  | 0.012544 | 0.00065  | 0.0027   |
| 30.9  | 100    | 64.3464  | 23648 | 36  | 0.009021 | 0.00065  | 0.002661 |
| 6.6   | 100    | 95.8415  | 36781 | 41  | 0.003176 | 0.000758 | 0.003231 |
| 26.4  | 100    | 54.453   | 21682 | 18  | 0.636048 | 0.000758 | 0.002837 |
| 24.9  | 100    | 34.9889  | 12437 | 21  | 0.201893 | 0.000758 | 0.003208 |
| 1.4   | 100    | 25.3718  | 8739  | 49  | 0.00028  | 0.000758 | 0.002786 |
| 21.8  | 100    | 36.9918  | 12421 | 43  | 0.001681 | 0.000758 | 0.002814 |
| 0.7   | 100    | 68.6113  | 23616 | 30  | 0.036682 | 0.000758 | 0.003169 |

|       |        |          |       |    |          |          |          |
|-------|--------|----------|-------|----|----------|----------|----------|
| 16.9  | 100    | 107.0417 | 39736 | 35 | 0.014632 | 0.000758 | 0.003046 |
| 20    | 100    | 50.2477  | 17699 | 20 | 0.439636 | 0.000758 | 0.002866 |
| 40.1  | 100    | 58.1853  | 19441 | 42 | 0.002178 | 0.000758 | 0.003197 |
| 3.3   | 100    | 72.4125  | 24746 | 32 | 0.025305 | 0.000868 | 0.003547 |
| 9     | 100    | 59.8076  | 21909 | 28 | 0.048458 | 0.000868 | 0.003453 |
| 14.2  | 100    | 87.9178  | 32927 | 54 | 0.00015  | 0.000868 | 0.003304 |
| 0     | 100    | 61.3458  | 22127 | 34 | 0.019248 | 0.000868 | 0.003345 |
| 7.9   | 100    | 49.9392  | 17979 | 38 | 0.002521 | 0.000951 | 0.00458  |
| 10    | 100    | 73.7936  | 25318 | 33 | 0.01012  | 0.000951 | 0.003884 |
| 37.6  | 100    | 26.769   | 8017  | 22 | 0.198996 | 0.000951 | 0.004389 |
| 151.3 | 100    | 28.4412  | 9169  | 21 | 0.274255 | 0.000951 | 0.004184 |
| 29.5  | 60.601 | 50.8013  | 17922 | 45 | 0.001265 | 0.000951 | 0.003781 |
| 0.6   | 100    | 71.294   | 26119 | 35 | 0.008176 | 0.000951 | 0.003998 |
| 8.9   | 100    | 96.8023  | 34454 | 38 | 0.004987 | 0.000951 | 0.00385  |
| 6.2   | 100    | 55.9974  | 22343 | 31 | 0.031363 | 0.000951 | 0.004134 |
| 23.4  | 100    | 23.3841  | 7544  | 36 | 0.008608 | 0.000951 | 0.003672 |
| 2.5   | 100    | 92.5365  | 35348 | 41 | 0.002789 | 0.000951 | 0.003737 |
| 20.8  | 100    | 44.9661  | 14298 | 19 | 0.592911 | 0.000951 | 0.004407 |
| 20.4  | 50.624 | 85.5502  | 30752 | 14 | 1.296896 | 0.001022 | 0.005598 |
| 6.5   | 100    | 68.066   | 25090 | 32 | 0.024082 | 0.001022 | 0.004993 |
| 90.3  | 100    | 38.3931  | 11947 | 41 | 0.003016 | 0.001022 | 0.005471 |
| 1.4   | 100    | 19.6052  | 6893  | 50 | 0.000478 | 0.001022 | 0.00572  |
| 2.1   | 100    | 21.9151  | 6486  | 58 | 1.68E-05 | 0.001022 | 0.005546 |
| 0.4   | 100    | 134.3722 | 52377 | 39 | 0.003568 | 0.001022 | 0.004713 |
| 21.5  | 100    | 64.0793  | 21525 | 15 | 1.415521 | 0.001114 | 0.005895 |
| 0     | 100    | 134.781  | 52522 | 32 | 0.019526 | 0.001114 | 0.006015 |
| 177.9 | 60.041 | 51.0796  | 16580 | 12 | 1.611266 | 0.001114 | 0.006232 |
| 38.2  | 88.529 | 97.3359  | 34663 | 35 | 0.009783 | 0.001114 | 0.006373 |
| 5.9   | 100    | 82.6757  | 30724 | 23 | 0.197078 | 0.001114 | 0.006186 |
| 1.3   | 100    | 88.7653  | 33118 | 32 | 0.023972 | 0.001114 | 0.006019 |
| 147.2 | 100    | 36.5873  | 12254 | 24 | 0.126205 | 0.001114 | 0.005914 |
| 5.5   | 100    | 56.714   | 18722 | 38 | 0.0034   | 0.00121  | 0.006567 |
| 33.8  | 100    | 21.5627  | 7263  | 45 | 0.000419 | 0.00121  | 0.006694 |
| 215.3 | 100    | 37.1717  | 12859 | 21 | 0.311047 | 0.00121  | 0.006606 |
| 75.5  | 100    | 21.2287  | 7631  | 45 | 0.000471 | 0.00121  | 0.006727 |
| 72    | 100    | 64.2058  | 23597 | 32 | 0.019505 | 0.00121  | 0.006836 |
| 49.9  | 100    | 27.2881  | 9435  | 21 | 0.243    | 0.00121  | 0.006795 |
| 71.9  | 100    | 20.4583  | 6326  | 15 | 1.37718  | 0.001308 | 0.006963 |
| 0.5   | 100    | 130.7487 | 50973 | 35 | 0.007438 | 0.00141  | 0.007362 |
| 0.4   | 100    | 131.6762 | 48876 | 28 | 0.038588 | 0.001498 | 0.007716 |
| 2.5   | 100    | 96.833   | 34467 | 35 | 0.008792 | 0.001498 | 0.007756 |
| 0.8   | 100    | 97.8545  | 34864 | 45 | 0.001426 | 0.001498 | 0.008047 |
| 254.9 | 88.162 | 29.6852  | 11172 | 27 | 0.086053 | 0.001498 | 0.007525 |
| 15.7  | 100    | 17.2362  | 4959  | 54 | 3.87E-05 | 0.001498 | 0.007704 |
| 1.9   | 100    | 93.634   | 35012 | 40 | 0.001604 | 0.001498 | 0.007948 |
| 0.8   | 100    | 108.9006 | 40900 | 31 | 0.037496 | 0.001576 | 0.008488 |
| 23    | 100    | 50.8572  | 18352 | 35 | 0.004509 | 0.001576 | 0.008377 |
| 5.2   | 100    | 23.4608  | 6987  | 25 | 0.095026 | 0.001576 | 0.00848  |
| 2.7   | 100    | 93.5444  | 35787 | 41 | 0.002885 | 0.001758 | 0.009304 |
| 6.8   | 100    | 83.1816  | 30912 | 10 | 4.180216 | 0.001758 | 0.009008 |
| 21.8  | 100    | 48.789   | 15780 | 19 | 0.459333 | 0.001758 | 0.009064 |
| 15.7  | 100    | 54.6071  | 17910 | 19 | 0.370237 | 0.001854 | 0.009877 |

|       |        |          |       |    |          |          |          |
|-------|--------|----------|-------|----|----------|----------|----------|
| 85.3  | 100    | 55.2853  | 22039 | 41 | 0.003421 | 0.001854 | 0.009886 |
| 2.3   | 100    | 84.9915  | 30515 | 20 | 0.381069 | 0.001854 | 0.00974  |
| 9.4   | 100    | 87.535   | 33203 | 53 | 0.000114 | 0.001854 | 0.009884 |
| 18.1  | 100    | 69.9052  | 23791 | 34 | 0.009677 | 0.001945 | 0.009944 |
| 18.1  | 100    | 69.9052  | 23791 | 34 | 0.009677 | 0.001945 | 0.009944 |
| 0     | 100    | 129.4264 | 49313 | 18 | 0.603525 | 0.002012 | 0.01056  |
| 18.3  | 100    | 73.2829  | 25095 | 36 | 0.004325 | 0.002012 | 0.01027  |
| 25.7  | 100    | 39.3319  | 14021 | 30 | 0.034473 | 0.002012 | 0.01105  |
| 24.9  | 60.269 | 46.2559  | 18148 | 28 | 0.055187 | 0.002012 | 0.01113  |
| 22    | 100    | 27.3098  | 9019  | 40 | 0.00291  | 0.002079 | 0.01236  |
| 4.3   | 100    | 60.9451  | 21966 | 16 | 1.164599 | 0.002079 | 0.01157  |
| 1.4   | 100    | 76.8884  | 28560 | 47 | 0.000106 | 0.002079 | 0.01179  |
| 8.5   | 100    | 68.2285  | 25155 | 22 | 0.239715 | 0.002079 | 0.01146  |
| 12.7  | 100    | 54.9115  | 18025 | 22 | 0.23456  | 0.002079 | 0.01171  |
| 160.6 | 100    | 21.7472  | 7848  | 49 | 0.000175 | 0.002079 | 0.01235  |
| 20.3  | 100    | 55.9748  | 20474 | 43 | 0.001514 | 0.002079 | 0.01214  |
| 158.7 | 100    | 48.3914  | 16964 | 49 | 0.000344 | 0.002079 | 0.01162  |
| 2.7   | 100    | 51.8746  | 16981 | 42 | 0.001511 | 0.002257 | 0.01254  |
| 40.6  | 100    | 48.9467  | 17724 | 37 | 0.005065 | 0.002315 | 0.01353  |
| 53.4  | 100    | 37.1228  | 12838 | 39 | 0.004542 | 0.002315 | 0.01399  |
| 28.1  | 100    | 21.0003  | 6533  | 40 | 0.003814 | 0.002315 | 0.01396  |
| 17.9  | 100    | 14.5627  | 4339  | 42 | 0.002059 | 0.002315 | 0.01414  |
| 5.6   | 100    | 20.1403  | 5925  | 29 | 0.017399 | 0.002315 | 0.01331  |
| 15.7  | 100    | 54.1497  | 19245 | 31 | 0.027445 | 0.002315 | 0.01389  |
| 2.6   | 100    | 89.5486  | 33417 | 45 | 0.000499 | 0.002315 | 0.01337  |
| 13.5  | 100    | 29.6322  | 9894  | 42 | 0.001941 | 0.002376 | 0.0142   |
| 0.8   | 100    | 67.9922  | 24809 | 39 | 0.004051 | 0.002376 | 0.01426  |
| 0.4   | 100    | 118.9592 | 44468 | 26 | 0.048103 | 0.002376 | 0.01538  |
| 5.6   | 100    | 67.6383  | 22906 | 22 | 0.228133 | 0.002376 | 0.0149   |
| 0.4   | 100    | 103.4072 | 38920 | 24 | 0.148157 | 0.002543 | 0.01589  |
| 11.1  | 100    | 49.3995  | 17315 | 47 | 0.000202 | 0.002543 | 0.01627  |
| 5.3   | 100    | 55.4912  | 22131 | 29 | 0.059686 | 0.002719 | 0.0165   |
| 49.5  | 100    | 51.7941  | 18295 | 38 | 0.002531 | 0.002719 | 0.01643  |
| 3.3   | 100    | 73.039   | 27067 | 41 | 0.001198 | 0.002777 | 0.01764  |
| 7.1   | 100    | 49.4342  | 17774 | 33 | 0.007658 | 0.002777 | 0.01714  |
| 2.3   | 100    | 76.389   | 28377 | 45 | 0.000183 | 0.002777 | 0.01811  |
| 17.3  | 100    | 38.6792  | 12049 | 15 | 0.62586  | 0.002843 | 0.01912  |
| 4.2   | 100    | 81.1647  | 30152 | 16 | 0.96557  | 0.002843 | 0.01835  |
| 10    | 100    | 115.4404 | 43267 | 25 | 0.026486 | 0.002843 | 0.01882  |
| 24.3  | 100    | 29.3442  | 9909  | 34 | 0.012605 | 0.002843 | 0.0185   |
| 0.9   | 100    | 131.3227 | 48755 | 17 | 0.199802 | 0.00302  | 0.01957  |
| 19.8  | 100    | 15.6188  | 4443  | 38 | 0.005685 | 0.003096 | 0.01998  |
| 3.5   | 100    | 44.7733  | 17486 | 36 | 0.011362 | 0.003096 | 0.01975  |
| 5.9   | 100    | 32.5455  | 12362 | 45 | 0.000111 | 0.003178 | 0.02042  |
| 286.5 | 14.86  | 48.1105  | 16851 | 44 | 0.001151 | 0.003254 | 0.02108  |
| 18.1  | 100    | 15.508   | 4245  | 38 | 0.005123 | 0.00337  | 0.02365  |
| 16.8  | 100    | 51.4392  | 18589 | 46 | 0.000214 | 0.00337  | 0.02393  |
| 28.1  | 100    | 15.6606  | 4651  | 34 | 0.012852 | 0.00337  | 0.02427  |
| 7.4   | 100    | 59.9512  | 20104 | 31 | 0.02295  | 0.00337  | 0.02188  |
| 23.4  | 100    | 50.429   | 17771 | 24 | 0.149969 | 0.00337  | 0.0225   |
| 166.3 | 11.56  | 47.8893  | 16761 | 55 | 8.87E-05 | 0.00337  | 0.0224   |
| 93.4  | 100    | 21.7412  | 6815  | 12 | 2.278812 | 0.00337  | 0.02261  |

|       |        |          |       |    |          |          |          |
|-------|--------|----------|-------|----|----------|----------|----------|
| 35.6  | 100    | 36.7923  | 12568 | 44 | 0.000909 | 0.00337  | 0.02225  |
| 122.2 | 100    | 27.9267  | 9366  | 38 | 0.005278 | 0.00337  | 0.0232   |
| 80.9  | 100    | 22.024   | 6927  | 10 | 4.226422 | 0.003736 | 0.02679  |
| 27.3  | 100    | 63.9559  | 21476 | 34 | 0.010451 | 0.003736 | 0.02759  |
| 30.9  | 100    | 28.2297  | 9360  | 38 | 0.00443  | 0.003736 | 0.02684  |
| 12.2  | 100    | 42.5484  | 13410 | 42 | 0.001484 | 0.003736 | 0.02702  |
| 28.1  | 100    | 15.167   | 4424  | 32 | 0.019411 | 0.003892 | 0.02823  |
| 0.9   | 100    | 86.4726  | 35311 | 42 | 0.001948 | 0.003967 | 0.02875  |
| 4.3   | 100    | 64.888   | 23854 | 41 | 0.001969 | 0.003967 | 0.02896  |
| 8.6   | 100    | 51.0118  | 16650 | 20 | 0.400611 | 0.004049 | 0.02917  |
| 10    | 100    | 48.4464  | 17396 | 26 | 0.039457 | 0.004124 | 0.02978  |
| 0.3   | 15.136 | 140.5935 | 54188 | 25 | 0.051774 | 0.004192 | 0.03068  |
| 9.2   | 100    | 86.0083  | 32098 | 21 | 0.239751 | 0.004192 | 0.03066  |
| 13.2  | 100    | 29.0411  | 8782  | 25 | 0.086254 | 0.004192 | 0.03053  |
| 47.9  | 100    | 28.4348  | 9558  | 38 | 0.004582 | 0.004266 | 0.03082  |
| 6.1   | 100    | 75.3261  | 27753 | 19 | 0.356023 | 0.004266 | 0.03096  |
| 11.2  | 100    | 65.0011  | 21883 | 7  | 5.690342 | 0.004581 | 0.03243  |
| 21.8  | 100    | 52.222   | 19525 | 31 | 0.02764  | 0.004643 | 0.03271  |
| 16.3  | 100    | 60.6649  | 22232 | 30 | 0.02877  | 0.004643 | 0.03275  |
| 0     | 100    | 133.765  | 52164 | 26 | 0.078683 | 0.005325 | 0.03677  |
| 5.8   | 100    | 54.7821  | 21826 | 33 | 0.023721 | 0.005325 | 0.03714  |
| 5.2   | 100    | 60.8432  | 21921 | 25 | 0.149431 | 0.005478 | 0.03803  |
| 8     | 100    | 105.5827 | 39145 | 16 | 0.685319 | 0.005478 | 0.03775  |
| 56.8  | 100    | 22.6155  | 7140  | 14 | 1.516766 | 0.005618 | 0.03883  |
| 53.3  | 100    | 61.3033  | 20651 | 24 | 0.102806 | 0.00573  | 0.04136  |
| 18.6  | 100    | 30.2243  | 10595 | 32 | 0.018423 | 0.00573  | 0.03989  |
| 35.6  | 100    | 54.9905  | 20080 | 28 | 0.054372 | 0.005792 | 0.04246  |
| 4.3   | 100    | 108.396  | 44538 | 25 | 0.123153 | 0.005792 | 0.04165  |
| 0     | 100    | 131.8233 | 48928 | 18 | 0.356005 | 0.00599  | 0.04512  |
| 62.3  | 100    | 20.9505  | 6395  | 15 | 1.15836  | 0.00599  | 0.04532  |
| 56.6  | 25.2   | 12.9905  | 3514  | 34 | 0.01483  | 0.00599  | 0.04398  |
| 6.7   | 100    | 65.241   | 21972 | 16 | 0.83758  | 0.006069 | 0.04556  |
| 31.3  | 100    | 27.8292  | 9152  | 34 | 0.010727 | 0.006428 | 0.04667  |
| 0.7   | 100    | 92.0328  | 35141 | 26 | 0.074499 | 0.006497 | 0.04826  |
| 4.6   | 100    | 82.4575  | 28704 | 25 | 0.145766 | 0.006497 | 0.0482   |
| 24.7  | 100    | 55.9955  | 20482 | 29 | 0.044195 | 0.006872 | 0.04986  |
| 0.9   | 100    | 25.6499  | 7625  | 38 | 0.003352 | 0.006991 | 0.05108  |
| 1.5   | 100    | 73.1533  | 25043 | 16 | 1.00751  | 0.006991 | 0.05113  |
| 1     | 100    | 101.7878 | 38776 | 18 | 0.207229 | 0.008361 | 0.06276  |
| 14.3  | 100    | 29.0904  | 8797  | 36 | 0.007078 | 0.0085   | 0.06326  |
| 16.8  | 100    | 27.8143  | 9210  | 30 | 0.02613  | 0.00861  | 0.06494  |
| 8.6   | 100    | 93.7085  | 35861 | 15 | 1.416968 | 0.00861  | 0.06521  |
| 23.2  | 100    | 35.4991  | 12630 | 17 | 0.439393 | 0.008997 | 0.06881  |
| 3.4   | 100    | 96.9093  | 36296 | 17 | 0.817572 | 0.009514 | 0.07616  |
| 1.3   | 100    | 39.2194  | 15131 | 29 | 0.023047 | 0.009818 | 0.07924  |
| 0.8   | 100    | 97.3501  | 34669 | 26 | 0.110113 | 0.009858 | 0.08095  |
| 6.3   | 100    | 44.2689  | 15775 | 32 | 0.014163 | 0.009858 | 0.08013  |
| 83.8  | 100    | 47.9199  | 15425 | 39 | 0.004006 | 0        | 2.34E-05 |
| 41.8  | 100    | 61.9521  | 22726 | 50 | 0.000412 | 0        | 1.38E-05 |
| 176.2 | 100    | 29.7766  | 9940  | 27 | 0.036387 | 0        | 0.000385 |
| 87.5  | 58.906 | 29.5153  | 9844  | 64 | 8.24E-06 | 0        | 4.33E-05 |
| 204.6 | 1.479  | 29.1783  | 9715  | 40 | 0.002451 | 0        | 0.00037  |

|       |        |          |       |    |          |          |          |
|-------|--------|----------|-------|----|----------|----------|----------|
| 16.9  | 100    | 76.8309  | 27070 | 38 | 0.003847 | 0        | 2.59E-06 |
| 104.7 | 100    | 30.1225  | 10551 | 31 | 0.017966 | 0        | 0.000834 |
| 26.9  | 100    | 52.428   | 17085 | 34 | 0.011764 | 0        | 0.00071  |
| 46.1  | 36.558 | 105.3527 | 37843 | 71 | 2.19E-06 | 0        | 3.77E-06 |
| 54.7  | 21.426 | 105.3515 | 37842 | 59 | 3.2E-05  | 0        | 1.31E-05 |
| 0.8   | 100    | 112.23   | 43158 | 47 | 0.000654 | 0        | 0.001119 |
| 12.5  | 100    | 103.7631 | 39632 | 54 | 0.000105 | 0        | 0.000141 |
| 10    | 100    | 104.1645 | 39795 | 51 | 0.000205 | 0        | 0.000382 |
| 22.5  | 46.021 | 76.936   | 28955 | 51 | 0.000244 | 0        | 0.000609 |
| 39.2  | 49.782 | 76.9442  | 28959 | 73 | 1.53E-06 | 0        | 3.82E-07 |
| 13.7  | 100    | 79.2378  | 29922 | 70 | 3.33E-06 | 0        | 7.58E-06 |
| 31.5  | 9.794  | 60.1176  | 24082 | 56 | 0.000103 | 0        | 1.67E-06 |
| 8     | 100    | 65.0286  | 26215 | 46 | 0.000926 | 0        | 0.000326 |
| 24    | 48.09  | 60.4262  | 24228 | 81 | 3.08E-07 | 0        | 7.23E-09 |
| 67.3  | 39.152 | 60.6296  | 24322 | 61 | 2.92E-05 | 0        | 8.86E-07 |
| 15    | 100    | 60.9354  | 24456 | 73 | 1.8E-06  | 0        | 1.54E-07 |
| 13.5  | 100    | 62.6598  | 25213 | 48 | 0.000603 | 0        | 3.09E-05 |
| 13.5  | 100    | 63.4511  | 25546 | 33 | 0.019397 | 0        | 0.001098 |
| 6.1   | 100    | 63.9631  | 25762 | 38 | 0.00639  | 0        | 0.000561 |
| 11.9  | 100    | 61.6377  | 24771 | 52 | 0.000224 | 0        | 1.74E-05 |
| 65.2  | 100    | 61.1345  | 24549 | 64 | 1.56E-05 | 0        | 9E-07    |
| 16.9  | 100    | 62.1464  | 24997 | 56 | 0.000104 | 0        | 3.72E-06 |
| 42.8  | 13.883 | 80.7425  | 28783 | 60 | 4.23E-05 | 0        | 0.000264 |
| 18.2  | 13.002 | 28.2075  | 10570 | 39 | 0.006137 | 0        | 0.000256 |
| 40.7  | 59.936 | 28.2619  | 10595 | 34 | 0.017458 | 0        | 5.54E-05 |
| 141.2 | 100    | 26.9988  | 10085 | 41 | 0.001384 | 0        | 0.000271 |
| 9     | 100    | 80.6862  | 28027 | 43 | 0.000528 | 0.000141 | 0.001599 |
| 7.2   | 100    | 70.2742  | 23933 | 63 | 2.17E-05 | 0.000273 | 0.001951 |
| 0.8   | 100    | 123.3889 | 46046 | 38 | 0.004607 | 0.000525 | 0.00229  |
| 7.5   | 100    | 59.9177  | 23999 | 39 | 0.005046 | 0.000525 | 0.002238 |
| 6     | 100    | 105.8523 | 38045 | 37 | 0.004907 | 0.00065  | 0.002753 |
| 33.2  | 100    | 54.5066  | 19392 | 42 | 0.002465 | 0.000758 | 0.003006 |
| 54    | 6.598  | 54.0023  | 19187 | 39 | 0.00479  | 0.000951 | 0.004348 |
| 67.9  | 8.063  | 55.0972  | 18100 | 41 | 0.003356 | 0.000951 | 0.004289 |
| 2.2   | 100    | 61.4478  | 22527 | 30 | 0.037149 | 0.000951 | 0.003709 |
| 69.3  | 50.212 | 80.8002  | 28808 | 27 | 0.083917 | 0.001022 | 0.005243 |
| 18.8  | 100    | 68.8243  | 23710 | 62 | 2.76E-05 | 0.00121  | 0.006489 |
| 84.9  | 100    | 30.7926  | 9388  | 16 | 0.489291 | 0.001308 | 0.007109 |
| 7.5   | 100    | 104.8459 | 37623 | 29 | 0.03327  | 0.001758 | 0.009312 |
| 35.1  | 100    | 80.2994  | 28596 | 26 | 0.108803 | 0.002012 | 0.01063  |
| 24.9  | 100    | 59.2607  | 19836 | 27 | 0.120416 | 0.002079 | 0.01231  |
| 63.1  | 100    | 29.6178  | 10345 | 17 | 0.352831 | 0.002079 | 0.01161  |
| 25.5  | 100    | 73.5652  | 27273 | 47 | 0.00047  | 0.002079 | 0.01138  |
| 48.4  | 100    | 30.2916  | 9209  | 21 | 0.168061 | 0.002257 | 0.01259  |
| 24.4  | 100    | 29.9415  | 9074  | 27 | 0.037779 | 0.002376 | 0.01445  |
| 6.1   | 100    | 75.142   | 28195 | 38 | 0.003263 | 0.002376 | 0.01422  |
| 90.3  | 100    | 80.6072  | 30228 | 37 | 0.007019 | 0.002376 | 0.01476  |
| 12.1  | 100    | 19.6926  | 6510  | 49 | 0.000239 | 0.002376 | 0.01521  |
| 85.6  | 79.972 | 54.0554  | 19208 | 26 | 0.096335 | 0.002777 | 0.01785  |
| 6.3   | 100    | 70.3953  | 23979 | 36 | 0.010075 | 0.002777 | 0.0179   |
| 13.9  | 100    | 54.5896  | 17903 | 30 | 0.03623  | 0.002777 | 0.01812  |
| 14    | 100    | 55.008   | 19593 | 32 | 0.024811 | 0.003096 | 0.02013  |

|       |        |          |       |    |          |          |          |
|-------|--------|----------|-------|----|----------|----------|----------|
| 5.6   | 100    | 47.9353  | 15431 | 30 | 0.029761 | 0.003674 | 0.02634  |
| 14.5  | 100    | 53.4978  | 18986 | 25 | 0.109846 | 0.004124 | 0.0295   |
| 31    | 100    | 75.8602  | 28505 | 20 | 0.284486 | 0.004424 | 0.03175  |
| 32.9  | 100    | 60.8055  | 20255 | 15 | 1.707911 | 0.005325 | 0.03727  |
| 163.2 | 2.232  | 80.1062  | 30007 | 40 | 0.002613 | 0.009858 | 0.08064  |
| 47.6  | 100    | 76.8754  | 27087 | 39 | 0.004285 | 0        | 0.000311 |
| 19.6  | 22.619 | 76.6704  | 27003 | 66 | 9.95E-06 | 0        | 6.4E-05  |
| 16.1  | 100    | 56.2003  | 20563 | 44 | 0.001742 | 0        | 0.00058  |
| 51.9  | 21.696 | 55.4247  | 20254 | 82 | 2.53E-07 | 0        | 2.96E-08 |
| 11    | 100    | 56.7029  | 20759 | 59 | 5.66E-05 | 0        | 2.6E-05  |
| 11    | 100    | 55.2124  | 20173 | 51 | 0.000354 | 0        | 0.000237 |
| 12.7  | 100    | 78.1928  | 27040 | 35 | 0.012459 | 0        | 0.001405 |
| 14.4  | 100    | 65.6113  | 23851 | 42 | 0.002258 | 0        | 0.000265 |
| 50.5  | 100    | 65.1101  | 23656 | 35 | 0.013226 | 0        | 0.00016  |
| 26.7  | 100    | 42.7484  | 14642 | 51 | 0.000187 | 0        | 0.000367 |
| 29.7  | 100    | 43.364   | 16892 | 56 | 2.72E-05 | 0        | 0.001211 |
| 30.9  | 100    | 36.8472  | 12903 | 45 | 0.000212 | 0        | 0.000556 |
| 12.8  | 100    | 52.8489  | 21002 | 54 | 0.000179 | 0        | 0.001206 |
| 28.7  | 100    | 51.79    | 20537 | 35 | 0.012749 | 0        | 0.000155 |
| 16.6  | 100    | 52.3398  | 20774 | 66 | 1.08E-05 | 0        | 8.87E-05 |
| 16.2  | 100    | 51.8301  | 20555 | 61 | 3.34E-05 | 0        | 0.000185 |
| 10.4  | 94.931 | 53.3526  | 21225 | 49 | 0.000609 | 0.000141 | 0.001565 |
| 10.2  | 100    | 52.2993  | 20756 | 34 | 0.017672 | 0.000273 | 0.001838 |
| 38.5  | 100    | 52.8003  | 20982 | 29 | 0.050402 | 0.000758 | 0.003159 |
| 12.6  | 100    | 53.9362  | 19161 | 28 | 0.061152 | 0.000951 | 0.003629 |
| 183.3 | 22.091 | 43.8666  | 17103 | 63 | 5.02E-06 | 0.001022 | 0.004811 |
| 3.8   | 100    | 58.0078  | 21234 | 53 | 4.68E-05 | 0.003674 | 0.02645  |
| 15.9  | 100    | 50.7685  | 20092 | 21 | 0.33301  | 0.006795 | 0.04974  |
| 19.8  | 62.074 | 62.4234  | 22910 | 61 | 3.84E-05 | 0        | 7.87E-06 |
| 11.5  | 100    | 61.9195  | 22713 | 52 | 0.000283 | 0        | 4.88E-05 |
| 47.6  | 100    | 76.8754  | 27087 | 39 | 0.004285 | 0        | 0.000311 |
| 19.6  | 22.619 | 76.6704  | 27003 | 66 | 9.95E-06 | 0        | 6.4E-05  |
| 19.8  | 100    | 129.5368 | 47724 | 58 | 6.13E-05 | 0        | 1.05E-07 |
| 12.7  | 100    | 78.1928  | 27040 | 35 | 0.012459 | 0        | 0.001405 |
| 14.4  | 100    | 65.6113  | 23851 | 42 | 0.002258 | 0        | 0.000265 |
| 50.5  | 100    | 65.1101  | 23656 | 35 | 0.013226 | 0        | 0.00016  |
| 9.9   | 100    | 112.3147 | 41919 | 26 | 0.090747 | 0        | 3.86E-06 |
| 12.8  | 100    | 52.8489  | 21002 | 54 | 0.000179 | 0        | 0.001206 |
| 28.7  | 100    | 51.79    | 20537 | 35 | 0.012749 | 0        | 0.000155 |
| 16.6  | 100    | 52.3398  | 20774 | 66 | 1.08E-05 | 0        | 8.87E-05 |
| 16.2  | 100    | 51.8301  | 20555 | 61 | 3.34E-05 | 0        | 0.000185 |
| 10.4  | 94.931 | 53.3526  | 21225 | 49 | 0.000609 | 0.000141 | 0.001565 |
| 10.2  | 100    | 52.2993  | 20756 | 34 | 0.017672 | 0.000273 | 0.001838 |
| 5     | 100    | 62.4348  | 22914 | 43 | 0.002401 | 0.000525 | 0.002404 |
| 38.5  | 100    | 52.8003  | 20982 | 29 | 0.050402 | 0.000758 | 0.003159 |
| 127.8 | 100    | 42.4985  | 16516 | 49 | 0.000197 | 0.000758 | 0.00319  |
| 84.9  | 100    | 43.0023  | 16740 | 48 | 0.000209 | 0.001114 | 0.005931 |
| 1.7   | 100    | 112.2493 | 41888 | 16 | 0.999812 | 0.001758 | 0.009118 |
| 3.8   | 100    | 58.0078  | 21234 | 53 | 4.68E-05 | 0.003674 | 0.02645  |
| 5     | 100    | 129.0358 | 47516 | 15 | 1.060492 | 0.003967 | 0.02868  |
| 15.9  | 100    | 50.7685  | 20092 | 21 | 0.33301  | 0.006795 | 0.04974  |
| 22.9  | 28.841 | 104.4696 | 37470 | 72 | 2.98E-06 | 0        | 1.81E-08 |



|       |        |          |       |    |          |          |          |
|-------|--------|----------|-------|----|----------|----------|----------|
| 5.1   | 100    | 103.9647 | 37272 | 38 | 0.007638 | 0        | 0.000567 |
| 6.5   | 100    | 104.9717 | 37673 | 52 | 0.000296 | 0        | 2.62E-05 |
| 31.7  | 9.257  | 141.2702 | 54957 | 66 | 6.91E-06 | 0        | 0.000479 |
| 58.7  | 83.044 | 57.3447  | 20768 | 76 | 5.07E-07 | 0        | 1.13E-05 |
| 59.7  | 41.802 | 57.3428  | 20767 | 47 | 0.00034  | 0.000951 | 0.003695 |
| 10.6  | 100    | 56.8346  | 20572 | 11 | 1.194285 | 0.009764 | 0.0784   |
| 5.9   | 100    | 112.7956 | 43892 | 74 | 1.23E-06 | 0        | 2.77E-07 |
| 12.5  | 100    | 112.7736 | 43882 | 54 | 0.000131 | 0        | 2.85E-05 |
| 4.5   | 100    | 94.6246  | 36255 | 25 | 0.093227 | 0.000525 | 0.002289 |
| 9.9   | 100    | 79.7727  | 29599 | 37 | 0.007344 | 0.000951 | 0.004017 |
| 7.9   | 100    | 13.368   | 3619  | 32 | 0.004778 | 0.002376 | 0.01452  |
| 28.9  | 100    | 70.6141  | 26128 | 48 | 0.000477 | 0        | 8.39E-05 |
| 38    | 100    | 70.6283  | 26133 | 64 | 1.2E-05  | 0        | 9.39E-06 |
| 5.3   | 100    | 51.4773  | 18696 | 36 | 0.011539 | 0.000525 | 0.002294 |
| 261.6 | 46.28  | 21.8078  | 6720  | 26 | 0.07192  | 0.001308 | 0.007055 |
| 11.5  | 100    | 51.5024  | 18705 | 22 | 0.281107 | 0.002257 | 0.0129   |
| 97.6  | 100    | 35.8417  | 11969 | 37 | 0.002362 | 0        | 0.000183 |
| 12.8  | 100    | 105.6297 | 40427 | 55 | 4.49E-05 | 0        | 6.03E-06 |
| 1.7   | 100    | 106.1336 | 40611 | 40 | 0.0017   | 0        | 0.001089 |
| 19.2  | 100    | 90.7859  | 32067 | 42 | 0.001977 | 0.000758 | 0.002991 |
| 27.8  | 100    | 29.4237  | 9810  | 30 | 0.009081 | 0        | 0.000133 |
| 11.5  | 100    | 63.5749  | 23162 | 54 | 9.45E-05 | 0        | 4.6E-05  |
| 3.6   | 100    | 88.5391  | 33200 | 32 | 0.023555 | 0.000525 | 0.002401 |
| 14.1  | 100    | 58.264   | 19324 | 50 | 0.00045  | 0        | 0.0006   |
| 27.5  | 100    | 117.6114 | 45870 | 53 | 0.000105 | 0        | 0.001307 |
| 51    | 100    | 58.4244  | 19382 | 24 | 0.155186 | 0.00065  | 0.002749 |
| 52.9  | 100    | 21.3431  | 7680  | 28 | 0.037843 | 0.002315 | 0.01357  |
| 4.5   | 100    | 117.1056 | 45662 | 31 | 0.013315 | 0.004803 | 0.03382  |
| 17.9  | 100    | 83.3873  | 29096 | 64 | 1.7E-05  | 0        | 5.26E-07 |
| 55.9  | 100    | 82.8847  | 28887 | 33 | 0.022685 | 0        | 0.000113 |
| 68.4  | 100    | 57.6834  | 19100 | 38 | 0.00548  | 0.000868 | 0.00358  |
| 57.6  | 100    | 57.1817  | 18901 | 28 | 0.055727 | 0.000951 | 0.00382  |
| 19.6  | 100    | 47.679   | 17106 | 29 | 0.043582 | 0.003674 | 0.02658  |
| 107.9 | 100    | 15.9979  | 4815  | 55 | 0.000106 | 0.000525 | 0.002384 |
| 28.5  | 100    | 60.0657  | 21587 | 24 | 0.139404 | 0.000951 | 0.004127 |
| 365.3 | 88.265 | 15.9601  | 4796  | 36 | 0.008971 | 0.001022 | 0.005551 |
| 81.7  | 95.302 | 64.8119  | 26118 | 41 | 0.001768 | 0.001758 | 0.009255 |
| 95.1  | 100    | 65.3198  | 26345 | 44 | 0.001045 | 0.002012 | 0.01083  |
| 210.7 | 100    | 15.8502  | 5016  | 55 | 0.000111 | 0.002012 | 0.01077  |
| 320.3 | 6.942  | 15.8454  | 5013  | 36 | 0.008892 | 0.003178 | 0.02046  |
| 51.7  | 100    | 16.0092  | 4409  | 25 | 0.092658 | 0.007572 | 0.05456  |
| 4.1   | 100    | 125.8763 | 46905 | 45 | 0.001043 | 0        | 0.000516 |
| 4     | 100    | 125.3696 | 46724 | 53 | 0.000155 | 0        | 0.000144 |
| 142.5 | 100    | 55.1347  | 21979 | 39 | 0.00193  | 0        | 0.000488 |
| 23.5  | 100    | 55.9589  | 20917 | 35 | 0.011063 | 0.003254 | 0.0214   |
| 13.4  | 100    | 62.9015  | 23093 | 46 | 0.001236 | 0        | 0.000318 |
| 73    | 100    | 18.662   | 6086  | 19 | 0.577141 | 0        | 0.000657 |
| 0     | 100    | 109.3979 | 44927 | 22 | 0.255757 | 0.002079 | 0.01141  |
| 13.4  | 100    | 62.9015  | 23093 | 46 | 0.001236 | 0        | 0.000318 |
| 73    | 100    | 18.662   | 6086  | 19 | 0.577141 | 0        | 0.000657 |
| 0     | 100    | 109.3979 | 44927 | 22 | 0.255757 | 0.002079 | 0.01141  |
| 3.8   | 100    | 127.6068 | 52375 | 45 | 0.000538 | 0        | 0.000346 |

|       |        |          |       |    |          |          |          |
|-------|--------|----------|-------|----|----------|----------|----------|
| 36.7  | 100    | 28.0045  | 8439  | 29 | 0.037882 | 0.000525 | 0.002438 |
| 0.8   | 100    | 102.3787 | 39228 | 25 | 0.036952 | 0.001308 | 0.007067 |
| 25.6  | 100    | 65.6895  | 24340 | 27 | 0.049312 | 0        | 0.000238 |
| 3.4   | 100    | 89.0439  | 33983 | 35 | 0.012436 | 0.000141 | 0.001807 |
| 11.3  | 100    | 27.3472  | 8248  | 48 | 9.39E-05 | 0.003967 | 0.02877  |
| 35.2  | 100    | 59.9049  | 19914 | 41 | 0.002605 | 0        | 0.00012  |
| 13.2  | 100    | 64.0816  | 21753 | 22 | 0.285968 | 0.002079 | 0.01174  |
| 21.2  | 100    | 30.4135  | 10674 | 31 | 0.01148  | 0.002376 | 0.01526  |
| 11.9  | 100    | 61.3362  | 22542 | 39 | 0.00578  | 0.000758 | 0.003126 |
| 24.5  | 100    | 89.7989  | 32499 | 51 | 8.37E-05 | 0.000758 | 0.003163 |
| 21.6  | 100    | 87.0039  | 31377 | 42 | 0.001444 | 0.000951 | 0.004101 |
| 7.1   | 100    | 97.159   | 36407 | 44 | 0.001925 | 0        | 0.00063  |
| 40.3  | 100    | 46.4351  | 16183 | 43 | 0.000541 | 0.001498 | 0.007678 |
| 3.5   | 100    | 99.9078  | 35663 | 20 | 0.255139 | 0.004643 | 0.03359  |
| 14.5  | 100    | 61.2807  | 20437 | 55 | 7.22E-05 | 0.000273 | 0.001891 |
| 3.3   | 100    | 103.5879 | 37130 | 29 | 0.048017 | 0.001758 | 0.009674 |
| 7.3   | 100    | 81.0321  | 30098 | 21 | 0.292307 | 0.002012 | 0.01114  |
| 1.4   | 100    | 93.8515  | 33306 | 42 | 0.003124 | 0.000525 | 0.002379 |
| 8.4   | 100    | 76.8767  | 28506 | 25 | 0.10949  | 0.001022 | 0.004974 |
| 68.5  | 100    | 52.9124  | 19247 | 24 | 0.127393 | 0.004192 | 0.0301   |
| 16.1  | 100    | 62.5352  | 23029 | 27 | 0.042997 | 0        | 0.001487 |
| 0     | 100    | 109.3979 | 44927 | 22 | 0.255757 | 0.002079 | 0.01141  |
| 17.3  | 100    | 42.1698  | 13276 | 31 | 0.018206 | 0.003892 | 0.0283   |
| 16.1  | 100    | 62.5352  | 23029 | 27 | 0.042997 | 0        | 0.001487 |
| 0     | 100    | 109.3979 | 44927 | 22 | 0.255757 | 0.002079 | 0.01141  |
| 17.3  | 100    | 42.1698  | 13276 | 31 | 0.018206 | 0.003892 | 0.0283   |
| 16.1  | 100    | 62.5352  | 23029 | 27 | 0.042997 | 0        | 0.001487 |
| 0     | 100    | 109.3979 | 44927 | 22 | 0.255757 | 0.002079 | 0.01141  |
| 17.3  | 100    | 42.1698  | 13276 | 31 | 0.018206 | 0.003892 | 0.0283   |
| 234.9 | 100    | 46.6629  | 16237 | 7  | 3.772812 | 0.001114 | 0.006152 |
| 15.9  | 100    | 52.2947  | 19014 | 44 | 0.000674 | 0.002315 | 0.01318  |
| 34.8  | 100    | 42.0243  | 16308 | 30 | 0.025828 | 0.004581 | 0.03248  |
| 39.3  | 100    | 42.1858  | 14559 | 31 | 0.026874 | 0.001576 | 0.008164 |
| 8.9   | 100    | 95.6035  | 34898 | 26 | 0.095888 | 0.00337  | 0.02267  |
| 5.7   | 100    | 84.426   | 30288 | 20 | 0.478467 | 0.003674 | 0.02512  |
| 5.4   | 100    | 17.7369  | 5142  | 58 | 2.47E-05 | 0.001576 | 0.008311 |
| 3.1   | 100    | 85.3497  | 31744 | 18 | 0.579149 | 0.004344 | 0.03159  |
| 12.3  | 100    | 57.2791  | 20739 | 37 | 0.004633 | 0.004643 | 0.03294  |
| 4     | 100    | 89.2679  | 33309 | 50 | 0.000365 | 0        | 0.000292 |
| 10.2  | 100    | 89.2582  | 33305 | 50 | 0.000341 | 0        | 0.000111 |
| 32.7  | 9.911  | 88.2598  | 32920 | 73 | 1.7E-06  | 0        | 2.7E-07  |
| 8.1   | 100    | 88.7576  | 33115 | 51 | 0.000317 | 0        | 0.000428 |
| 40.2  | 5.167  | 88.254   | 32917 | 75 | 1.1E-06  | 0        | 2.22E-07 |
| 28.1  | 100    | 51.1727  | 16713 | 21 | 0.342394 | 0        | 0.00128  |
| 5.1   | 100    | 83.0203  | 30853 | 28 | 0.057249 | 0        | 0.000185 |
| 18.4  | 100    | 87.7462  | 32706 | 56 | 9.99E-05 | 0        | 4.01E-06 |
| 31.3  | 1.662  | 68.5723  | 25304 | 68 | 6.49E-06 | 0        | 6.19E-07 |
| 29.6  | 58.28  | 68.6392  | 25332 | 91 | 2.73E-08 | 0        | 6.23E-10 |
| 9.4   | 100    | 68.7342  | 25374 | 44 | 0.001599 | 0        | 0.001198 |
| 6.3   | 100    | 69.5855  | 25716 | 41 | 0.002806 | 0        | 0.000797 |
| 25.7  | 100    | 69.0773  | 25515 | 65 | 1.33E-05 | 0        | 1.53E-07 |
| 49.3  | 43.781 | 63.7359  | 23418 | 46 | 0.000922 | 0        | 0.00108  |

|       |        |          |       |    |          |   |          |
|-------|--------|----------|-------|----|----------|---|----------|
| 46.9  | 100    | 57.6402  | 19219 | 34 | 0.014759 | 0 | 0.000641 |
| 4.1   | 100    | 64.3835  | 23662 | 57 | 5.05E-05 | 0 | 0.000423 |
| 77.6  | 17.356 | 64.239   | 23609 | 51 | 0.00025  | 0 | 0.001127 |
| 3.8   | 100    | 82.1746  | 30536 | 30 | 0.04226  | 0 | 0.00028  |
| 9.3   | 100    | 82.0119  | 30476 | 25 | 0.125128 | 0 | 6.58E-05 |
| 9.6   | 100    | 81.6708  | 30348 | 27 | 0.084903 | 0 | 0.000145 |
| 8.3   | 100    | 81.5063  | 30286 | 27 | 0.073003 | 0 | 0.000182 |
| 10.1  | 100    | 82.514   | 30664 | 34 | 0.014137 | 0 | 2.67E-05 |
| 7.6   | 100    | 55.121   | 18211 | 48 | 0.000783 | 0 | 8.29E-05 |
| 0.6   | 100    | 55.1236  | 18212 | 34 | 0.017944 | 0 | 0.000289 |
| 17.6  | 100    | 75.0969  | 27841 | 27 | 0.082775 | 0 | 0.000712 |
| 4.5   | 100    | 38.4029  | 11951 | 61 | 2.45E-05 | 0 | 0.001428 |
| 6.9   | 100    | 24.343   | 7906  | 58 | 3.01E-05 | 0 | 0.000982 |
| 21.8  | 100    | 39.3984  | 12297 | 41 | 0.002884 | 0 | 0.00143  |
| 38.4  | 100    | 23.0512  | 7414  | 40 | 0.003138 | 0 | 0.00093  |
| 14.7  | 100    | 29.8338  | 9961  | 67 | 7.81E-06 | 0 | 0.000122 |
| 33.1  | 100    | 35.4424  | 12046 | 38 | 0.004392 | 0 | 0.000236 |
| 11.5  | 100    | 45.9594  | 14674 | 54 | 0.00016  | 0 | 6.7E-05  |
| 11.5  | 100    | 45.9594  | 14674 | 54 | 0.00016  | 0 | 6.7E-05  |
| 20.2  | 100    | 46.4667  | 14867 | 65 | 1.17E-05 | 0 | 2.29E-05 |
| 20.2  | 100    | 46.4667  | 14867 | 65 | 1.17E-05 | 0 | 2.29E-05 |
| 9     | 100    | 119.4643 | 44656 | 57 | 4E-05    | 0 | 1.08E-05 |
| 32    | 100    | 15.1434  | 4255  | 30 | 0.034953 | 0 | 0.00116  |
| 36.4  | 100    | 14.8534  | 4147  | 33 | 0.015535 | 0 | 0.001312 |
| 1.8   | 100    | 132.4457 | 49151 | 43 | 0.001043 | 0 | 9.68E-05 |
| 23.5  | 35.082 | 131.9448 | 48972 | 53 | 9.9E-05  | 0 | 1.48E-08 |
| 0     | 100    | 130.3155 | 48421 | 29 | 0.015557 | 0 | 0.000455 |
| 6.1   | 100    | 108.8976 | 44732 | 63 | 2.03E-05 | 0 | 1.88E-05 |
| 5.3   | 100    | 108.7816 | 44688 | 54 | 0.000178 | 0 | 3.86E-05 |
| 5.9   | 100    | 109.2922 | 44884 | 57 | 8.93E-05 | 0 | 2.75E-05 |
| 8.2   | 100    | 109.4081 | 44932 | 79 | 5.35E-07 | 0 | 3.08E-08 |
| 20.6  | 100    | 110.3017 | 45328 | 41 | 0.003104 | 0 | 0.000444 |
| 5.4   | 100    | 109.9185 | 45151 | 70 | 4.03E-06 | 0 | 1.31E-06 |
| 24.3  | 100    | 109.7951 | 45095 | 54 | 0.000186 | 0 | 5.1E-06  |
| 3.2   | 100    | 102.4165 | 42057 | 42 | 0.002612 | 0 | 0.000411 |
| 6.8   | 12.361 | 101.9126 | 41863 | 67 | 8.38E-06 | 0 | 5.19E-06 |
| 7     | 85.262 | 101.5135 | 41704 | 65 | 1.24E-05 | 0 | 2.72E-06 |
| 9.3   | 3.983  | 101.4086 | 41662 | 75 | 1.23E-06 | 0 | 7.99E-07 |
| 22.2  | 100    | 43.3436  | 15514 | 35 | 0.009998 | 0 | 0.001017 |
| 17.6  | 100    | 43.1498  | 15436 | 77 | 7.29E-07 | 0 | 9.73E-07 |
| 23.1  | 100    | 59.1549  | 19798 | 37 | 0.007404 | 0 | 0.000254 |
| 84.1  | 4.349  | 60.1605  | 22041 | 51 | 0.000238 | 0 | 0.001305 |
| 135   | 11.242 | 58.1428  | 19424 | 48 | 0.000632 | 0 | 0.000298 |
| 53.1  | 100    | 58.645   | 19610 | 37 | 0.008415 | 0 | 0.000548 |
| 21.2  | 100    | 51.4576  | 18688 | 35 | 0.01139  | 0 | 0.000856 |
| 148.9 | 4.277  | 60.4305  | 20307 | 59 | 3.53E-05 | 0 | 4.71E-05 |
| 47    | 57.244 | 60.4589  | 20318 | 85 | 7.56E-08 | 0 | 7.63E-07 |
| 21.2  | 100    | 51.4576  | 18688 | 35 | 0.01139  | 0 | 0.000856 |
| 85.2  | 100    | 59.9213  | 20092 | 45 | 0.000782 | 0 | 8.08E-05 |
| 2.5   | 100    | 69.1152  | 23831 | 52 | 0.000221 | 0 | 7.54E-05 |
| 12    | 100    | 69.7858  | 24100 | 46 | 0.000868 | 0 | 1.33E-06 |
| 35.6  | 100    | 14.6067  | 4178  | 47 | 0.000648 | 0 | 0.001371 |

|       |        |          |       |     |          |   |          |
|-------|--------|----------|-------|-----|----------|---|----------|
| 114.9 | 100    | 14.5851  | 4169  | 45  | 0.000957 | 0 | 0.000106 |
| 3.7   | 100    | 140.6238 | 57525 | 85  | 1.46E-07 | 0 | 1.47E-09 |
| 101.4 | 100    | 52.8074  | 17229 | 41  | 0.003715 | 0 | 6.14E-05 |
| 9.5   | 100    | 65.7441  | 22168 | 47  | 0.000832 | 0 | 4.49E-07 |
| 2.6   | 29.228 | 62.7411  | 20996 | 57  | 8.74E-05 | 0 | 1.45E-08 |
| 4.3   | 86.101 | 62.261   | 20810 | 56  | 0.000126 | 0 | 1.91E-09 |
| 2.2   | 17.673 | 62.2385  | 20800 | 55  | 0.000158 | 0 | 1.11E-08 |
| 2.4   | 100    | 62.7664  | 21006 | 62  | 2.99E-05 | 0 | 1.03E-09 |
| 61    | 7.949  | 64.4971  | 21692 | 42  | 0.001872 | 0 | 5.86E-07 |
| 61.6  | 100    | 64.4036  | 21656 | 28  | 0.054819 | 0 | 0.000122 |
| 0.3   | 100    | 63.2738  | 21208 | 48  | 0.000685 | 0 | 8.97E-06 |
| 13.8  | 100    | 63.2467  | 21197 | 47  | 0.000872 | 0 | 2.33E-07 |
| 91.8  | 36.913 | 27.7745  | 8361  | 61  | 2.54E-05 | 0 | 6.43E-05 |
| 90.4  | 36.259 | 27.4831  | 8265  | 44  | 0.001116 | 0 | 0.00114  |
| 81.8  | 2.313  | 27.2708  | 8193  | 58  | 5.54E-05 | 0 | 0.000169 |
| 67.9  | 94.792 | 140.8249 | 55398 | 83  | 2.48E-07 | 0 | 9.42E-10 |
| 31.9  | 71.454 | 140.8228 | 55397 | 70  | 4.35E-06 | 0 | 1.64E-09 |
| 40.3  | 100    | 140.767  | 55367 | 111 | 2.67E-10 | 0 | 3.12E-14 |
| 9.8   | 21.931 | 140.764  | 55365 | 102 | 2.03E-09 | 0 | 1.67E-11 |
| 23.9  | 100    | 15.2336  | 4161  | 35  | 0.009444 | 0 | 0.000265 |
| 10.5  | 100    | 36.2184  | 11223 | 29  | 0.031967 | 0 | 0.00066  |
| 70.2  | 25.217 | 97.3035  | 34650 | 65  | 9.96E-06 | 0 | 0.000237 |
| 7.9   | 100    | 89.41    | 31524 | 69  | 4.46E-06 | 0 | 5.63E-06 |
| 81.6  | 45.86  | 88.9059  | 31315 | 18  | 0.50117  | 0 | 4.47E-05 |
| 6.2   | 100    | 93.3989  | 33136 | 50  | 0.0003   | 0 | 0.000187 |
| 1.3   | 100    | 107.5418 | 38773 | 39  | 0.004615 | 0 | 0.000353 |
| 71    | 21.14  | 88.7522  | 31248 | 46  | 0.000913 | 0 | 1.78E-06 |
| 57    | 19.079 | 88.7406  | 31242 | 73  | 1.68E-06 | 0 | 2.44E-08 |
| 0.4   | 100    | 122.3613 | 44907 | 33  | 0.017932 | 0 | 2.38E-05 |
| 0     | 100    | 77.461   | 26758 | 37  | 0.007894 | 0 | 4.22E-05 |
| 40.3  | 98.337 | 77.2925  | 26698 | 30  | 0.036704 | 0 | 1.26E-06 |
| 0.9   | 100    | 76.9597  | 26568 | 58  | 6.44E-05 | 0 | 3.17E-08 |
| 2.7   | 33.561 | 76.7827  | 26502 | 52  | 0.000249 | 0 | 8.53E-09 |
| 7.2   | 100    | 122.012  | 44770 | 67  | 8.67E-06 | 0 | 5.41E-08 |
| 14    | 100    | 121.5059 | 44563 | 67  | 7.16E-06 | 0 | 2.01E-10 |
| 4.7   | 100    | 77.7994  | 26890 | 50  | 0.000388 | 0 | 2.32E-06 |
| 17.6  | 57.805 | 121.8591 | 44705 | 46  | 0.001035 | 0 | 1.31E-10 |
| 83.3  | 100    | 73.2864  | 25097 | 33  | 0.010149 | 0 | 0.000423 |
| 9.7   | 100    | 73.2003  | 25063 | 51  | 0.000313 | 0 | 1.03E-06 |
| 84.8  | 11.655 | 73.1817  | 25056 | 51  | 0.000162 | 0 | 6.44E-05 |
| 20.2  | 19.658 | 73.025   | 24994 | 68  | 6.72E-06 | 0 | 1.35E-09 |
| 17.5  | 100    | 72.7833  | 24890 | 44  | 0.000971 | 0 | 0.00061  |
| 11.8  | 100    | 72.6715  | 24849 | 38  | 0.003195 | 0 | 0.000192 |
| 12.6  | 100    | 72.6106  | 24825 | 20  | 0.460521 | 0 | 0.000975 |
| 1.6   | 100    | 72.5145  | 24786 | 32  | 0.029017 | 0 | 0.00059  |
| 22.8  | 100    | 73.338   | 25120 | 38  | 0.005127 | 0 | 0.000671 |
| 19.2  | 100    | 73.3893  | 25141 | 47  | 0.000678 | 0 | 9.08E-05 |
| 40.2  | 100    | 74.6971  | 25688 | 50  | 0.00034  | 0 | 0.000697 |
| 22.4  | 100    | 73.8929  | 25361 | 61  | 2.7E-05  | 0 | 9.8E-06  |
| 45.3  | 25.014 | 73.8421  | 25338 | 56  | 7.89E-05 | 0 | 2.84E-05 |
| 77.7  | 58.628 | 73.6921  | 25276 | 47  | 0.000343 | 0 | 3.77E-05 |
| 7     | 100    | 73.5365  | 25204 | 59  | 5.98E-05 | 0 | 7.6E-07  |

|      |        |          |       |     |          |   |          |
|------|--------|----------|-------|-----|----------|---|----------|
| 9.5  | 45.774 | 121.3538 | 44498 | 70  | 3.79E-06 | 0 | 2.63E-12 |
| 20.7 | 100    | 88.3457  | 31076 | 56  | 7.92E-05 | 0 | 2.72E-05 |
| 3.3  | 100    | 88.3158  | 31063 | 70  | 3.05E-06 | 0 | 1E-05    |
| 24.6 | 8.961  | 88.2375  | 31032 | 69  | 4.47E-06 | 0 | 1.08E-07 |
| 39.7 | 83.577 | 87.8389  | 30874 | 60  | 3.73E-05 | 0 | 4.86E-07 |
| 4.1  | 100    | 87.8135  | 30864 | 53  | 0.000175 | 0 | 8.15E-05 |
| 40.5 | 8.926  | 87.734   | 30829 | 70  | 3.92E-06 | 0 | 6.55E-08 |
| 12   | 100    | 87.2234  | 30620 | 51  | 0.00029  | 0 | 3.88E-05 |
| 7.5  | 100    | 82.965   | 28922 | 49  | 0.000515 | 0 | 0.000184 |
| 28.1 | 21.104 | 141.219  | 52667 | 103 | 1.97E-09 | 0 | 9.18E-13 |
| 24.5 | 25.115 | 141.2199 | 52668 | 85  | 1.22E-07 | 0 | 1.58E-09 |
| 5.4  | 100    | 72.2036  | 26489 | 54  | 0.00016  | 0 | 3.66E-06 |
| 29.3 | 100    | 15.0902  | 4200  | 32  | 0.018934 | 0 | 0.001467 |
| 41   | 39.332 | 75.7345  | 27926 | 79  | 3.14E-07 | 0 | 1.13E-06 |
| 31.8 | 60.692 | 74.1639  | 27309 | 47  | 0.000772 | 0 | 0.00134  |
| 53.1 | 39.716 | 73.6574  | 27114 | 48  | 0.000568 | 0 | 0.000118 |
| 15   | 100    | 140.8376 | 52461 | 100 | 3.33E-09 | 0 | 1.18E-11 |
| 14.4 | 100    | 140.8508 | 52467 | 100 | 3.17E-09 | 0 | 3.54E-12 |
| 8.7  | 100    | 86.6666  | 32376 | 58  | 4.49E-05 | 0 | 1.55E-05 |
| 16.6 | 17.954 | 140.8955 | 52491 | 114 | 1.51E-10 | 0 | 1.99E-13 |
| 13.7 | 53.167 | 140.782  | 52430 | 96  | 1.05E-08 | 0 | 4.32E-15 |
| 10.7 | 100    | 140.812  | 52447 | 61  | 2.6E-05  | 0 | 4.74E-08 |
| 9.6  | 100    | 141.0493 | 52573 | 86  | 7.35E-08 | 0 | 9.94E-09 |
| 29.4 | 100    | 83.6126  | 31114 | 39  | 0.004503 | 0 | 9.91E-05 |
| 4.2  | 100    | 140.9086 | 52498 | 112 | 2.33E-10 | 0 | 2.96E-10 |
| 14.1 | 100    | 140.9108 | 52499 | 93  | 1.81E-08 | 0 | 7.19E-10 |
| 5.9  | 89.163 | 69.8371  | 25536 | 49  | 0.000269 | 0 | 4.38E-05 |
| 20   | 100    | 54.2322  | 19276 | 41  | 0.003124 | 0 | 2.12E-05 |
| 15.6 | 100    | 54.7428  | 19488 | 39  | 0.004963 | 0 | 0.00039  |
| 20.2 | 100    | 26.8409  | 8079  | 42  | 0.00194  | 0 | 0.000292 |
| 50.9 | 100    | 49.2511  | 17310 | 63  | 1.29E-05 | 0 | 0.001194 |
| 61.4 | 86.948 | 51.2579  | 18094 | 88  | 7.3E-08  | 0 | 1.62E-09 |
| 37.9 | 5.492  | 50.751   | 17900 | 98  | 6.7E-09  | 0 | 1.06E-09 |
| 32   | 6.798  | 50.4588  | 17783 | 81  | 3.37E-07 | 0 | 7.65E-09 |
| 31.7 | 100    | 15.5013  | 4347  | 45  | 0.001132 | 0 | 0.00056  |
| 12.9 | 100    | 66.7191  | 24310 | 30  | 0.03666  | 0 | 0.000186 |
| 13.3 | 100    | 17.6396  | 5107  | 31  | 0.038553 | 0 | 0.000449 |
| 80   | 100    | 140.4503 | 55184 | 117 | 1.79E-11 | 0 | 4.57E-10 |
| 28.8 | 33.859 | 140.4313 | 55174 | 92  | 6.54E-09 | 0 | 3.8E-10  |
| 4.3  | 77.959 | 136.9296 | 53583 | 84  | 1.06E-07 | 0 | 4.48E-09 |
| 6.8  | 18.544 | 136.8392 | 53546 | 96  | 6.89E-09 | 0 | 1.17E-09 |
| 3.8  | 100    | 92.3529  | 34757 | 37  | 0.005719 | 0 | 0.001518 |
| 31.6 | 47.186 | 91.3458  | 34343 | 77  | 5.65E-07 | 0 | 2.11E-08 |
| 8    | 100    | 90.6739  | 34092 | 46  | 0.00076  | 0 | 5.77E-05 |
| 17.6 | 35.41  | 91.8496  | 34551 | 81  | 2.65E-07 | 0 | 8.98E-09 |
| 6    | 15.115 | 105.9902 | 40583 | 64  | 5.25E-06 | 0 | 1.72E-05 |
| 31.4 | 9.136  | 105.9557 | 40566 | 84  | 5.47E-08 | 0 | 3.26E-07 |
| 3.4  | 100    | 105.4805 | 40349 | 61  | 1.12E-05 | 0 | 3.97E-05 |
| 23.2 | 100    | 109.8544 | 40878 | 84  | 1.35E-07 | 0 | 7.11E-11 |
| 67.1 | 2.788  | 89.1158  | 33913 | 58  | 6.36E-05 | 0 | 6.91E-05 |
| 24.1 | 22.964 | 113.7589 | 42540 | 79  | 5.58E-07 | 0 | 1.02E-08 |
| 4.8  | 23.623 | 113.773  | 42546 | 70  | 4.57E-06 | 0 | 6.44E-07 |

|       |        |          |       |    |          |   |          |
|-------|--------|----------|-------|----|----------|---|----------|
| 2.5   | 100    | 96.2288  | 36939 | 36 | 0.012345 | 0 | 0.000803 |
| 20    | 92.912 | 95.72    | 36730 | 48 | 0.000681 | 0 | 0.000201 |
| 12.8  | 92.397 | 95.3405  | 36570 | 61 | 3.21E-05 | 0 | 2.74E-06 |
| 21.7  | 58.098 | 95.2157  | 36514 | 48 | 0.000715 | 0 | 6.71E-05 |
| 0.4   | 100    | 111.5192 | 41585 | 96 | 1.25E-08 | 0 | 4.37E-07 |
| 6.1   | 100    | 96.7351  | 37142 | 38 | 0.006612 | 0 | 0.000427 |
| 13.7  | 100    | 94.8343  | 36346 | 49 | 0.000542 | 0 | 0.000166 |
| 0.6   | 100    | 93.0413  | 35567 | 47 | 0.000636 | 0 | 0.001342 |
| 10    | 49.412 | 94.7118  | 36292 | 44 | 0.001673 | 0 | 4.04E-05 |
| 10.5  | 100    | 94.2086  | 36078 | 42 | 0.002927 | 0 | 0.000223 |
| 172.1 | 3.96   | 140.5927 | 54187 | 66 | 4.58E-06 | 0 | 3.7E-06  |
| 2.4   | 100    | 141.2964 | 54969 | 31 | 0.037107 | 0 | 0.000972 |
| 116.1 | 100    | 13.6894  | 3914  | 34 | 0.013462 | 0 | 0.000401 |
| 33.2  | 30.596 | 102.8952 | 38052 | 70 | 4.45E-06 | 0 | 3.77E-06 |
| 3.8   | 100    | 102.945  | 38072 | 45 | 0.00162  | 0 | 0.000409 |
| 158.8 | 48.697 | 140.6731 | 54233 | 82 | 2.79E-07 | 0 | 2.39E-07 |
| 0     | 100    | 134.2669 | 52336 | 83 | 1.43E-07 | 0 | 1.69E-06 |
| 50    | 88.716 | 140.3717 | 54077 | 59 | 4.14E-05 | 0 | 1.31E-10 |
| 23.1  | 100    | 106.0869 | 39346 | 31 | 0.025658 | 0 | 3.04E-05 |
| 20.4  | 24.272 | 131.8755 | 50352 | 61 | 9.79E-06 | 0 | 3.44E-06 |
| 2.4   | 100    | 131.7344 | 50295 | 29 | 0.021095 | 0 | 0.00037  |
| 14.1  | 100    | 131.6865 | 50276 | 32 | 0.010348 | 0 | 5.66E-05 |
| 35.3  | 100    | 56.0867  | 20017 | 42 | 0.002163 | 0 | 0.000466 |
| 18.3  | 100    | 55.6399  | 19839 | 83 | 1.58E-07 | 0 | 5.33E-07 |
| 115.7 | 15.021 | 55.5809  | 19816 | 53 | 0.000179 | 0 | 4.01E-05 |
| 10.2  | 100    | 118.6687 | 44672 | 30 | 0.024394 | 0 | 7.31E-07 |
| 31.3  | 100    | 65.8261  | 24019 | 37 | 0.007226 | 0 | 7.79E-05 |
| 1.2   | 100    | 115.5712 | 43327 | 38 | 0.008063 | 0 | 0.000513 |
| 34.3  | 41.416 | 66.3411  | 24232 | 87 | 6.31E-08 | 0 | 1.04E-06 |
| 85.1  | 3.804  | 66.3295  | 24227 | 40 | 0.003611 | 0 | 0.000572 |
| 47.9  | 67.416 | 118.6178 | 44648 | 65 | 6.55E-06 | 0 | 6.01E-10 |
| 31.4  | 100    | 66.8323  | 24445 | 42 | 0.002197 | 0 | 4.43E-05 |
| 14.8  | 100    | 69.5341  | 25561 | 41 | 0.002798 | 0 | 9.15E-05 |
| 6.9   | 100    | 102.4402 | 37855 | 61 | 3.75E-05 | 0 | 0.000131 |
| 104.4 | 100    | 70.5957  | 28621 | 51 | 0.000339 | 0 | 8.28E-05 |
| 7.5   | 100    | 44.7688  | 15971 | 51 | 0.000164 | 0 | 0.00095  |
| 32.7  | 100    | 49.5078  | 19545 | 36 | 0.010699 | 0 | 0.000364 |
| 37.5  | 100    | 51.3075  | 18517 | 47 | 0.000273 | 0 | 0.000473 |
| 67.8  | 8.102  | 50.7373  | 18286 | 46 | 0.000346 | 0 | 0.000732 |
| 28.6  | 36.117 | 141.0307 | 54449 | 57 | 5.05E-05 | 0 | 0.000335 |
| 1.2   | 93.779 | 78.7188  | 27907 | 15 | 1.441885 | 0 | 1.12E-05 |
| 48.2  | 37.822 | 48.5438  | 17432 | 48 | 0.000252 | 0 | 0.000265 |
| 53.3  | 100    | 49.0478  | 17625 | 52 | 9.6E-05  | 0 | 9.06E-05 |
| 43    | 2.841  | 44.4835  | 17360 | 50 | 0.00044  | 0 | 6.17E-05 |
| 183.8 | 3.731  | 45.7493  | 17926 | 36 | 0.0089   | 0 | 0.00031  |
| 199.1 | 100    | 45.2421  | 17691 | 25 | 0.107395 | 0 | 2.5E-05  |
| 16.7  | 100    | 70.0835  | 28396 | 52 | 0.000254 | 0 | 0.001392 |
| 69.3  | 9.763  | 50.0654  | 18030 | 55 | 5.19E-05 | 0 | 0.000517 |
| 15.3  | 100    | 86.9561  | 32052 | 56 | 3.54E-05 | 0 | 0.000238 |
| 55    | 100    | 86.4548  | 31884 | 47 | 0.000338 | 0 | 0.000453 |
| 52.8  | 100    | 85.9505  | 31714 | 46 | 0.000376 | 0 | 0.000823 |
| 19.1  | 100    | 62.8898  | 25310 | 61 | 2.43E-05 | 0 | 0.000224 |

|       |        |          |       |     |          |          |          |
|-------|--------|----------|-------|-----|----------|----------|----------|
| 22.8  | 100    | 141.5457 | 54757 | 104 | 1.13E-09 | 0        | 5.24E-11 |
| 0.8   | 94.784 | 141.5358 | 54752 | 44  | 0.000857 | 0        | 0.000107 |
| 48.6  | 5.024  | 85.4972  | 30729 | 31  | 0.027214 | 0        | 9.03E-07 |
| 40.6  | 46.488 | 85.5514  | 30753 | 36  | 0.009587 | 0        | 8.5E-07  |
| 12.4  | 100    | 86.0002  | 30941 | 29  | 0.047697 | 0        | 4.7E-06  |
| 97.7  | 68.421 | 141.3667 | 54655 | 104 | 7.86E-10 | 0        | 9.21E-13 |
| 28.2  | 28.035 | 141.365  | 54654 | 77  | 3.58E-07 | 0        | 1.59E-10 |
| 8.7   | 49.164 | 56.4759  | 22547 | 45  | 0.001395 | 0        | 9.46E-05 |
| 59.1  | 56.71  | 141.3641 | 54653 | 61  | 2.07E-05 | 0        | 2.86E-11 |
| 32.2  | 27.704 | 55.971   | 22331 | 45  | 0.001404 | 0        | 0.000263 |
| 15.4  | 100    | 57.4837  | 22988 | 40  | 0.004929 | 0        | 0.000451 |
| 12    | 100    | 56.9805  | 22763 | 47  | 0.000826 | 0        | 9.79E-05 |
| 49.4  | 100    | 141.3746 | 54659 | 80  | 2.54E-07 | 0        | 2.66E-15 |
| 66.7  | 89.696 | 54.965   | 21914 | 36  | 0.011077 | 0        | 0.000423 |
| 63.2  | 35.493 | 55.4691  | 22120 | 47  | 0.000963 | 0        | 8.63E-05 |
| 186.9 | 100    | 55.4094  | 22092 | 75  | 1.36E-06 | 0        | 1.29E-05 |
| 29    | 6.483  | 29.8773  | 11246 | 67  | 8.03E-06 | 0        | 3.55E-05 |
| 37.3  | 5.899  | 140.8143 | 54315 | 98  | 5.94E-09 | 0        | 3.78E-16 |
| 44.7  | 100    | 140.7981 | 54306 | 65  | 1.03E-05 | 0        | 1.05E-10 |
| 93.8  | 9.067  | 31.7019  | 12009 | 55  | 0.000112 | 0        | 0.001177 |
| 329   | 23.386 | 140.7637 | 54285 | 50  | 0.000276 | 0        | 0.000596 |
| 2.4   | 100    | 140.7477 | 54275 | 63  | 9.58E-06 | 0        | 0.000346 |
| 11.2  | 8.762  | 140.7857 | 54299 | 91  | 2.69E-08 | 0        | 8.89E-13 |
| 37.9  | 100    | 39.4948  | 15245 | 33  | 0.018954 | 0        | 0.000892 |
| 359.7 | 25.892 | 140.9153 | 54380 | 144 | 1.57E-13 | 0        | 8.74E-16 |
| 26.8  | 16.464 | 140.8922 | 54365 | 80  | 6.63E-08 | 0        | 1.12E-09 |
| 75.8  | 4.214  | 140.8914 | 54364 | 77  | 1.12E-07 | 0        | 1.31E-11 |
| 2.6   | 100    | 131.3715 | 50145 | 38  | 0.001849 | 0.000141 | 0.001645 |
| 143   | 14.753 | 20.9613  | 6517  | 21  | 0.316589 | 0.000141 | 0.001624 |
| 241.2 | 100    | 15.1572  | 4420  | 25  | 0.10876  | 0.000141 | 0.001795 |
| 79.5  | 100    | 42.6934  | 15268 | 42  | 0.001954 | 0.000141 | 0.001766 |
| 180.1 | 9.349  | 12.9888  | 3512  | 35  | 0.01421  | 0.000141 | 0.001562 |
| 135.5 | 100    | 14.4527  | 4114  | 33  | 0.015796 | 0.000141 | 0.001755 |
| 5.7   | 100    | 94.3311  | 36131 | 36  | 0.012243 | 0.000141 | 0.001813 |
| 5.8   | 100    | 87.3363  | 30665 | 40  | 0.003688 | 0.000141 | 0.001617 |
| 92.4  | 9.298  | 49.5573  | 17827 | 46  | 0.00035  | 0.000273 | 0.001872 |
| 175.8 | 1.368  | 15.2833  | 4700  | 32  | 0.02222  | 0.000273 | 0.002096 |
| 8     | 100    | 87.0985  | 32559 | 33  | 0.011793 | 0.000273 | 0.002031 |
| 1.3   | 100    | 102.0194 | 41908 | 35  | 0.01246  | 0.000273 | 0.001849 |
| 123   | 6.27   | 55.4692  | 20273 | 49  | 0.000428 | 0.000273 | 0.002032 |
| 18    | 100    | 86.0611  | 30966 | 4   | 14.60519 | 0.000273 | 0.00203  |
| 12.6  | 100    | 88.8532  | 31293 | 35  | 0.010982 | 0.000525 | 0.002525 |
| 9.1   | 100    | 50.9512  | 18371 | 40  | 0.001641 | 0.000525 | 0.002376 |
| 4.4   | 100    | 92.9945  | 35547 | 38  | 0.005154 | 0.000525 | 0.002223 |
| 55.5  | 100    | 42.6591  | 15255 | 39  | 0.003971 | 0.000525 | 0.00228  |
| 35.2  | 100    | 30.184   | 11381 | 40  | 0.003689 | 0.000525 | 0.002257 |
| 10    | 100    | 80.8186  | 30321 | 38  | 0.005858 | 0.000525 | 0.00234  |
| 9.5   | 100    | 92.486   | 35325 | 28  | 0.047809 | 0.00065  | 0.002717 |
| 56.2  | 100    | 25.9858  | 8517  | 22  | 0.173172 | 0.00065  | 0.002753 |
| 1.5   | 100    | 130.2483 | 50770 | 32  | 0.012544 | 0.00065  | 0.0027   |
| 30.9  | 100    | 64.3464  | 23648 | 36  | 0.009021 | 0.00065  | 0.002661 |
| 6.6   | 100    | 95.8415  | 36781 | 41  | 0.003176 | 0.000758 | 0.003231 |

|       |        |          |       |    |          |          |          |
|-------|--------|----------|-------|----|----------|----------|----------|
| 26.4  | 100    | 54.453   | 21682 | 18 | 0.636048 | 0.000758 | 0.002837 |
| 24.9  | 100    | 34.9889  | 12437 | 21 | 0.201893 | 0.000758 | 0.003208 |
| 1.4   | 100    | 25.3718  | 8739  | 49 | 0.00028  | 0.000758 | 0.002786 |
| 21.8  | 100    | 36.9918  | 12421 | 43 | 0.001681 | 0.000758 | 0.002814 |
| 0.7   | 100    | 68.6113  | 23616 | 30 | 0.036682 | 0.000758 | 0.003169 |
| 16.9  | 100    | 107.0417 | 39736 | 35 | 0.014632 | 0.000758 | 0.003046 |
| 20    | 100    | 50.2477  | 17699 | 20 | 0.439636 | 0.000758 | 0.002866 |
| 40.1  | 100    | 58.1853  | 19441 | 42 | 0.002178 | 0.000758 | 0.003197 |
| 3.3   | 100    | 72.4125  | 24746 | 32 | 0.025305 | 0.000868 | 0.003547 |
| 9     | 100    | 59.8076  | 21909 | 28 | 0.048458 | 0.000868 | 0.003453 |
| 14.2  | 100    | 87.9178  | 32927 | 54 | 0.00015  | 0.000868 | 0.003304 |
| 0     | 100    | 61.3458  | 22127 | 34 | 0.019248 | 0.000868 | 0.003345 |
| 7.9   | 100    | 49.9392  | 17979 | 38 | 0.002521 | 0.000951 | 0.00458  |
| 10    | 100    | 73.7936  | 25318 | 33 | 0.01012  | 0.000951 | 0.003884 |
| 37.6  | 100    | 26.769   | 8017  | 22 | 0.198996 | 0.000951 | 0.004389 |
| 151.3 | 100    | 28.4412  | 9169  | 21 | 0.274255 | 0.000951 | 0.004184 |
| 29.5  | 60.601 | 50.8013  | 17922 | 45 | 0.001265 | 0.000951 | 0.003781 |
| 8.9   | 100    | 96.8023  | 34454 | 38 | 0.004987 | 0.000951 | 0.00385  |
| 6.2   | 100    | 55.9974  | 22343 | 31 | 0.031363 | 0.000951 | 0.004134 |
| 23.4  | 100    | 23.3841  | 7544  | 36 | 0.008608 | 0.000951 | 0.003672 |
| 2.5   | 100    | 92.5365  | 35348 | 41 | 0.002789 | 0.000951 | 0.003737 |
| 20.8  | 100    | 44.9661  | 14298 | 19 | 0.592911 | 0.000951 | 0.004407 |
| 20.4  | 50.624 | 85.5502  | 30752 | 14 | 1.296896 | 0.001022 | 0.005598 |
| 6.5   | 100    | 68.066   | 25090 | 32 | 0.024082 | 0.001022 | 0.004993 |
| 90.3  | 100    | 38.3931  | 11947 | 41 | 0.003016 | 0.001022 | 0.005471 |
| 1.4   | 100    | 19.6052  | 6893  | 50 | 0.000478 | 0.001022 | 0.00572  |
| 2.1   | 100    | 21.9151  | 6486  | 58 | 1.68E-05 | 0.001022 | 0.005546 |
| 0.4   | 100    | 134.3722 | 52377 | 39 | 0.003568 | 0.001022 | 0.004713 |
| 21.5  | 100    | 64.0793  | 21525 | 15 | 1.415521 | 0.001114 | 0.005895 |
| 0     | 100    | 134.781  | 52522 | 32 | 0.019526 | 0.001114 | 0.006015 |
| 177.9 | 60.041 | 51.0796  | 16580 | 12 | 1.611266 | 0.001114 | 0.006232 |
| 38.2  | 88.529 | 97.3359  | 34663 | 35 | 0.009783 | 0.001114 | 0.006373 |
| 5.9   | 100    | 82.6757  | 30724 | 23 | 0.197078 | 0.001114 | 0.006186 |
| 1.3   | 100    | 88.7653  | 33118 | 32 | 0.023972 | 0.001114 | 0.006019 |
| 147.2 | 100    | 36.5873  | 12254 | 24 | 0.126205 | 0.001114 | 0.005914 |
| 5.5   | 100    | 56.714   | 18722 | 38 | 0.0034   | 0.00121  | 0.006567 |
| 33.8  | 100    | 21.5627  | 7263  | 45 | 0.000419 | 0.00121  | 0.006694 |
| 215.3 | 100    | 37.1717  | 12859 | 21 | 0.311047 | 0.00121  | 0.006606 |
| 75.5  | 100    | 21.2287  | 7631  | 45 | 0.000471 | 0.00121  | 0.006727 |
| 72    | 100    | 64.2058  | 23597 | 32 | 0.019505 | 0.00121  | 0.006836 |
| 49.9  | 100    | 27.2881  | 9435  | 21 | 0.243    | 0.00121  | 0.006795 |
| 71.9  | 100    | 20.4583  | 6326  | 15 | 1.37718  | 0.001308 | 0.006963 |
| 0.5   | 100    | 130.7487 | 50973 | 35 | 0.007438 | 0.00141  | 0.007362 |
| 0.4   | 100    | 131.6762 | 48876 | 28 | 0.038588 | 0.001498 | 0.007716 |
| 2.5   | 100    | 96.833   | 34467 | 35 | 0.008792 | 0.001498 | 0.007756 |
| 0.8   | 100    | 97.8545  | 34864 | 45 | 0.001426 | 0.001498 | 0.008047 |
| 254.9 | 88.162 | 29.6852  | 11172 | 27 | 0.086053 | 0.001498 | 0.007525 |
| 15.7  | 100    | 17.2362  | 4959  | 54 | 3.87E-05 | 0.001498 | 0.007704 |
| 0.8   | 100    | 108.9006 | 40900 | 31 | 0.037496 | 0.001576 | 0.008488 |
| 23    | 100    | 50.8572  | 18352 | 35 | 0.004509 | 0.001576 | 0.008377 |
| 5.2   | 100    | 23.4608  | 6987  | 25 | 0.095026 | 0.001576 | 0.00848  |
| 2.7   | 100    | 93.5444  | 35787 | 41 | 0.002885 | 0.001758 | 0.009304 |



|       |        |          |       |    |          |          |          |
|-------|--------|----------|-------|----|----------|----------|----------|
| 6.8   | 100    | 83.1816  | 30912 | 10 | 4.180216 | 0.001758 | 0.009008 |
| 21.8  | 100    | 48.789   | 15780 | 19 | 0.459333 | 0.001758 | 0.009064 |
| 15.7  | 100    | 54.6071  | 17910 | 19 | 0.370237 | 0.001854 | 0.009877 |
| 85.3  | 100    | 55.2853  | 22039 | 41 | 0.003421 | 0.001854 | 0.009886 |
| 2.3   | 100    | 84.9915  | 30515 | 20 | 0.381069 | 0.001854 | 0.00974  |
| 9.4   | 100    | 87.535   | 33203 | 53 | 0.000114 | 0.001854 | 0.009884 |
| 18.1  | 100    | 69.9052  | 23791 | 34 | 0.009677 | 0.001945 | 0.009944 |
| 18.1  | 100    | 69.9052  | 23791 | 34 | 0.009677 | 0.001945 | 0.009944 |
| 18.3  | 100    | 73.2829  | 25095 | 36 | 0.004325 | 0.002012 | 0.01027  |
| 25.7  | 100    | 39.3319  | 14021 | 30 | 0.034473 | 0.002012 | 0.01105  |
| 24.9  | 60.269 | 46.2559  | 18148 | 28 | 0.055187 | 0.002012 | 0.01113  |
| 22    | 100    | 27.3098  | 9019  | 40 | 0.00291  | 0.002079 | 0.01236  |
| 4.3   | 100    | 60.9451  | 21966 | 16 | 1.164599 | 0.002079 | 0.01157  |
| 1.4   | 100    | 76.8884  | 28560 | 47 | 0.000106 | 0.002079 | 0.01179  |
| 8.5   | 100    | 68.2285  | 25155 | 22 | 0.239715 | 0.002079 | 0.01146  |
| 12.7  | 100    | 54.9115  | 18025 | 22 | 0.23456  | 0.002079 | 0.01171  |
| 160.6 | 100    | 21.7472  | 7848  | 49 | 0.000175 | 0.002079 | 0.01235  |
| 20.3  | 100    | 55.9748  | 20474 | 43 | 0.001514 | 0.002079 | 0.01214  |
| 158.7 | 100    | 48.3914  | 16964 | 49 | 0.000344 | 0.002079 | 0.01162  |
| 2.7   | 100    | 51.8746  | 16981 | 42 | 0.001511 | 0.002257 | 0.01254  |
| 0     | 100    | 137.3487 | 53753 | 20 | 0.265607 | 0.002257 | 0.01245  |
| 40.6  | 100    | 48.9467  | 17724 | 37 | 0.005065 | 0.002315 | 0.01353  |
| 53.4  | 100    | 37.1228  | 12838 | 39 | 0.004542 | 0.002315 | 0.01399  |
| 28.1  | 100    | 21.0003  | 6533  | 40 | 0.003814 | 0.002315 | 0.01396  |
| 17.9  | 100    | 14.5627  | 4339  | 42 | 0.002059 | 0.002315 | 0.01414  |
| 5.6   | 100    | 20.1403  | 5925  | 29 | 0.017399 | 0.002315 | 0.01331  |
| 15.7  | 100    | 54.1497  | 19245 | 31 | 0.027445 | 0.002315 | 0.01389  |
| 2.6   | 100    | 89.5486  | 33417 | 45 | 0.000499 | 0.002315 | 0.01337  |
| 13.5  | 100    | 29.6322  | 9894  | 42 | 0.001941 | 0.002376 | 0.0142   |
| 0.8   | 100    | 67.9922  | 24809 | 39 | 0.004051 | 0.002376 | 0.01426  |
| 0.4   | 100    | 118.9592 | 44468 | 26 | 0.048103 | 0.002376 | 0.01538  |
| 5.6   | 100    | 67.6383  | 22906 | 22 | 0.228133 | 0.002376 | 0.0149   |
| 0.4   | 100    | 103.4072 | 38920 | 24 | 0.148157 | 0.002543 | 0.01589  |
| 11.1  | 100    | 49.3995  | 17315 | 47 | 0.000202 | 0.002543 | 0.01627  |
| 5.3   | 100    | 55.4912  | 22131 | 29 | 0.059686 | 0.002719 | 0.0165   |
| 49.5  | 100    | 51.7941  | 18295 | 38 | 0.002531 | 0.002719 | 0.01643  |
| 3.3   | 100    | 73.039   | 27067 | 41 | 0.001198 | 0.002777 | 0.01764  |
| 7.1   | 100    | 49.4342  | 17774 | 33 | 0.007658 | 0.002777 | 0.01714  |
| 2.3   | 100    | 76.389   | 28377 | 45 | 0.000183 | 0.002777 | 0.01811  |
| 17.3  | 100    | 38.6792  | 12049 | 15 | 0.62586  | 0.002843 | 0.01912  |
| 4.2   | 100    | 81.1647  | 30152 | 16 | 0.96557  | 0.002843 | 0.01835  |
| 10    | 100    | 115.4404 | 43267 | 25 | 0.026486 | 0.002843 | 0.01882  |
| 24.3  | 100    | 29.3442  | 9909  | 34 | 0.012605 | 0.002843 | 0.0185   |
| 0.9   | 100    | 131.3227 | 48755 | 17 | 0.199802 | 0.00302  | 0.01957  |
| 19.8  | 100    | 15.6188  | 4443  | 38 | 0.005685 | 0.003096 | 0.01998  |
| 3.5   | 100    | 44.7733  | 17486 | 36 | 0.011362 | 0.003096 | 0.01975  |
| 5.9   | 100    | 32.5455  | 12362 | 45 | 0.000111 | 0.003178 | 0.02042  |
| 286.5 | 14.86  | 48.1105  | 16851 | 44 | 0.001151 | 0.003254 | 0.02108  |
| 18.1  | 100    | 15.508   | 4245  | 38 | 0.005123 | 0.00337  | 0.02365  |
| 16.8  | 100    | 51.4392  | 18589 | 46 | 0.000214 | 0.00337  | 0.02393  |
| 28.1  | 100    | 15.6606  | 4651  | 34 | 0.012852 | 0.00337  | 0.02427  |
| 7.4   | 100    | 59.9512  | 20104 | 31 | 0.02295  | 0.00337  | 0.02188  |

|       |        |          |       |    |          |          |          |
|-------|--------|----------|-------|----|----------|----------|----------|
| 23.4  | 100    | 50.429   | 17771 | 24 | 0.149969 | 0.00337  | 0.0225   |
| 166.3 | 11.56  | 47.8893  | 16761 | 55 | 8.87E-05 | 0.00337  | 0.0224   |
| 93.4  | 100    | 21.7412  | 6815  | 12 | 2.278812 | 0.00337  | 0.02261  |
| 35.6  | 100    | 36.7923  | 12568 | 44 | 0.000909 | 0.00337  | 0.02225  |
| 122.2 | 100    | 27.9267  | 9366  | 38 | 0.005278 | 0.00337  | 0.0232   |
| 80.9  | 100    | 22.024   | 6927  | 10 | 4.226422 | 0.003736 | 0.02679  |
| 27.3  | 100    | 63.9559  | 21476 | 34 | 0.010451 | 0.003736 | 0.02759  |
| 30.9  | 100    | 28.2297  | 9360  | 38 | 0.00443  | 0.003736 | 0.02684  |
| 12.2  | 100    | 42.5484  | 13410 | 42 | 0.001484 | 0.003736 | 0.02702  |
| 28.1  | 100    | 15.167   | 4424  | 32 | 0.019411 | 0.003892 | 0.02823  |
| 0.9   | 100    | 86.4726  | 35311 | 42 | 0.001948 | 0.003967 | 0.02875  |
| 4.3   | 100    | 64.888   | 23854 | 41 | 0.001969 | 0.003967 | 0.02896  |
| 8.6   | 100    | 51.0118  | 16650 | 20 | 0.400611 | 0.004049 | 0.02917  |
| 10    | 100    | 48.4464  | 17396 | 26 | 0.039457 | 0.004124 | 0.02978  |
| 0.3   | 15.136 | 140.5935 | 54188 | 25 | 0.051774 | 0.004192 | 0.03068  |
| 9.2   | 100    | 86.0083  | 32098 | 21 | 0.239751 | 0.004192 | 0.03066  |
| 13.2  | 100    | 29.0411  | 8782  | 25 | 0.086254 | 0.004192 | 0.03053  |
| 47.9  | 100    | 28.4348  | 9558  | 38 | 0.004582 | 0.004266 | 0.03082  |
| 6.1   | 100    | 75.3261  | 27753 | 19 | 0.356023 | 0.004266 | 0.03096  |
| 11.2  | 100    | 65.0011  | 21883 | 7  | 5.690342 | 0.004581 | 0.03243  |
| 0     | 100    | 129.303  | 50374 | 27 | 0.033701 | 0.004643 | 0.0331   |
| 21.8  | 100    | 52.222   | 19525 | 31 | 0.02764  | 0.004643 | 0.03271  |
| 16.3  | 100    | 60.6649  | 22232 | 30 | 0.02877  | 0.004643 | 0.03275  |
| 0     | 100    | 133.765  | 52164 | 26 | 0.078683 | 0.005325 | 0.03677  |
| 5.8   | 100    | 54.7821  | 21826 | 33 | 0.023721 | 0.005325 | 0.03714  |
| 5.2   | 100    | 60.8432  | 21921 | 25 | 0.149431 | 0.005478 | 0.03803  |
| 8     | 100    | 105.5827 | 39145 | 16 | 0.685319 | 0.005478 | 0.03775  |
| 56.8  | 100    | 22.6155  | 7140  | 14 | 1.516766 | 0.005618 | 0.03883  |
| 53.3  | 100    | 61.3033  | 20651 | 24 | 0.102806 | 0.00573  | 0.04136  |
| 18.6  | 100    | 30.2243  | 10595 | 32 | 0.018423 | 0.00573  | 0.03989  |
| 35.6  | 100    | 54.9905  | 20080 | 28 | 0.054372 | 0.005792 | 0.04246  |
| 4.3   | 100    | 108.396  | 44538 | 25 | 0.123153 | 0.005792 | 0.04165  |
| 0     | 100    | 131.8233 | 48928 | 18 | 0.356005 | 0.00599  | 0.04512  |
| 62.3  | 100    | 20.9505  | 6395  | 15 | 1.15836  | 0.00599  | 0.04532  |
| 56.6  | 25.2   | 12.9905  | 3514  | 34 | 0.01483  | 0.00599  | 0.04398  |
| 6.7   | 100    | 65.241   | 21972 | 16 | 0.83758  | 0.006069 | 0.04556  |
| 31.3  | 100    | 27.8292  | 9152  | 34 | 0.010727 | 0.006428 | 0.04667  |
| 0.7   | 100    | 92.0328  | 35141 | 26 | 0.074499 | 0.006497 | 0.04826  |
| 4.6   | 100    | 82.4575  | 28704 | 25 | 0.145766 | 0.006497 | 0.0482   |
| 24.7  | 100    | 55.9955  | 20482 | 29 | 0.044195 | 0.006872 | 0.04986  |
| 0.9   | 100    | 25.6499  | 7625  | 38 | 0.003352 | 0.006991 | 0.05108  |
| 1.5   | 100    | 73.1533  | 25043 | 16 | 1.00751  | 0.006991 | 0.05113  |
| 1     | 100    | 101.7878 | 38776 | 18 | 0.207229 | 0.008361 | 0.06276  |
| 14.3  | 100    | 29.0904  | 8797  | 36 | 0.007078 | 0.0085   | 0.06326  |
| 16.8  | 100    | 27.8143  | 9210  | 30 | 0.02613  | 0.00861  | 0.06494  |
| 8.6   | 100    | 93.7085  | 35861 | 15 | 1.416968 | 0.00861  | 0.06521  |
| 23.2  | 100    | 35.4991  | 12630 | 17 | 0.439393 | 0.008997 | 0.06881  |
| 3.4   | 100    | 96.9093  | 36296 | 17 | 0.817572 | 0.009514 | 0.07616  |
| 1.3   | 100    | 39.2194  | 15131 | 29 | 0.023047 | 0.009818 | 0.07924  |
| 0.8   | 100    | 97.3501  | 34669 | 26 | 0.110113 | 0.009858 | 0.08095  |
| 6.3   | 100    | 44.2689  | 15775 | 32 | 0.014163 | 0.009858 | 0.08013  |
| 57.8  | 37.263 | 89.2607  | 33976 | 71 | 3.62E-06 | 0        | 8.08E-05 |

|       |        |          |       |     |          |          |          |
|-------|--------|----------|-------|-----|----------|----------|----------|
| 30.4  | 100    | 89.633   | 34142 | 53  | 0.000246 | 0        | 0.000189 |
| 42.6  | 29.447 | 89.5989  | 34126 | 65  | 1.33E-05 | 0        | 0.000118 |
| 19.9  | 100    | 56.6738  | 20256 | 62  | 2.69E-05 | 0        | 2.2E-05  |
| 49.9  | 100    | 56.6452  | 20246 | 47  | 0.000722 | 0        | 0.000339 |
| 24.2  | 100    | 56.1722  | 20052 | 53  | 0.000175 | 0        | 6.4E-05  |
| 9     | 100    | 83.142   | 31287 | 61  | 3.59E-05 | 0        | 0.001331 |
| 37.1  | 28.831 | 50.157   | 19823 | 59  | 5.6E-05  | 0        | 0.000425 |
| 11.5  | 100    | 70.4702  | 28564 | 65  | 5.58E-06 | 0        | 0.000123 |
| 24.3  | 100    | 71.3738  | 28955 | 53  | 0.000141 | 0        | 6.6E-05  |
| 137.9 | 22.594 | 141.0246 | 54444 | 102 | 2.62E-09 | 0        | 3.11E-12 |
| 74.5  | 90.01  | 141.0608 | 54469 | 109 | 6.11E-10 | 0        | 5.71E-13 |
| 30.8  | 19.887 | 71.9292  | 29206 | 79  | 3.93E-07 | 0        | 4.54E-07 |
| 17.8  | 100    | 71.4242  | 28978 | 78  | 4.89E-07 | 0        | 3.02E-06 |
| 38.1  | 10.32  | 71.8825  | 29184 | 54  | 0.000124 | 0.000273 | 0.001972 |
| 19.9  | 100    | 56.1431  | 20040 | 37  | 0.007258 | 0.001114 | 0.005996 |
| 17.2  | 100    | 89.0956  | 33903 | 41  | 0.003423 | 0.002012 | 0.01063  |
| 28.7  | 100    | 49.8388  | 19681 | 27  | 0.086952 | 0.002543 | 0.01606  |
| 11.3  | 100    | 50.7103  | 18298 | 33  | 0.019234 | 0.003736 | 0.02692  |
| 9     | 100    | 73.853   | 27369 | 21  | 0.252496 | 0.007499 | 0.05419  |
| 22    | 100    | 50.7665  | 18320 | 25  | 0.121288 | 0.007836 | 0.05657  |
| 7.4   | 100    | 51.1602  | 20260 | 29  | 0.050639 | 0.009655 | 0.07707  |
| 2.8   | 76.799 | 141.0573 | 54467 | 14  | 1.892211 | 0.00971  | 0.07786  |
| 8.6   | 100    | 140.4507 | 54115 | 76  | 1.14E-06 | 0        | 5.03E-08 |
| 70.4  | 52.549 | 140.4341 | 54107 | 82  | 2.63E-07 | 0        | 5.23E-11 |
| 28.4  | 86.347 | 141.1367 | 54513 | 82  | 2E-07    | 0        | 6.97E-10 |
| 68.3  | 81.802 | 140.9471 | 54401 | 114 | 1.33E-10 | 0        | 3.41E-13 |
| 40.5  | 100    | 34.646   | 13228 | 35  | 0.008069 | 0.00065  | 0.00267  |
| 16.8  | 100    | 39.2516  | 12243 | 45  | 0.000707 | 0        | 0.000593 |
| 101.2 | 61.59  | 34.1915  | 12144 | 64  | 1.45E-05 | 0        | 0.000118 |
| 163   | 100    | 53.8451  | 19143 | 29  | 0.028469 | 0        | 0.000681 |
| 5.2   | 100    | 72.9695  | 27286 | 67  | 2.02E-06 | 0        | 0.000204 |
| 45.8  | 30.486 | 77.7878  | 29020 | 54  | 8.98E-05 | 0        | 6.11E-05 |
| 18.1  | 71.832 | 54.1543  | 19256 | 52  | 0.000138 | 0.000273 | 0.001878 |
| 5.5   | 100    | 77.806   | 29028 | 34  | 0.010763 | 0.000868 | 0.003573 |
| 133.6 | 6.834  | 30.9259  | 10873 | 17  | 0.747409 | 0.000951 | 0.003663 |
| 75.8  | 100    | 31.4821  | 11095 | 18  | 0.573387 | 0.000951 | 0.004332 |
| 82.1  | 100    | 33.7971  | 11992 | 45  | 0.001205 | 0.001022 | 0.004661 |
| 116.6 | 100    | 13.7347  | 3937  | 24  | 0.076571 | 0.003533 | 0.02469  |
| 33.1  | 100    | 32.0171  | 11298 | 11  | 2.64482  | 0.004643 | 0.0332   |
| 50    | 100    | 30.4216  | 10678 | 11  | 2.555336 | 0.006926 | 0.05016  |
| 24.6  | 100    | 33.6871  | 11948 | 28  | 0.065591 | 0.006991 | 0.0514   |
| 19.3  | 100    | 34.6937  | 12324 | 31  | 0.031121 | 0.006991 | 0.05138  |
| 11    | 56.424 | 86.767   | 35439 | 58  | 7.77E-05 | 0        | 1.37E-06 |
| 8.4   | 100    | 87.2763  | 35665 | 55  | 0.000129 | 0        | 1.14E-05 |
| 31.8  | 69.667 | 55.1729  | 19655 | 55  | 0.000105 | 0        | 4.26E-05 |
| 9.8   | 100    | 63.9662  | 23188 | 65  | 7.16E-06 | 0        | 6.22E-08 |
| 15.2  | 100    | 86.6608  | 31228 | 55  | 0.000108 | 0        | 1.25E-05 |
| 8.8   | 100    | 51.4858  | 16829 | 37  | 0.002923 | 0.002079 | 0.01194  |
| 3.2   | 100    | 54.9919  | 19586 | 30  | 0.034558 | 0.002777 | 0.01805  |
| 19.6  | 100    | 38.7827  | 12087 | 36  | 0.006828 | 0        | 0.000467 |
| 24.1  | 100    | 75.0395  | 26309 | 52  | 0.00029  | 0        | 2.01E-06 |
| 14.6  | 100    | 15.1376  | 4214  | 47  | 0.000345 | 0        | 3.06E-05 |

|       |        |          |       |    |          |          |          |
|-------|--------|----------|-------|----|----------|----------|----------|
| 2.1   | 100    | 98.4341  | 36096 | 54 | 0.000224 | 0        | 0.000163 |
| 2.9   | 100    | 98.9394  | 36320 | 34 | 0.020411 | 0        | 0.001018 |
| 0.3   | 100    | 14.5949  | 4029  | 40 | 0.000711 | 0.002543 | 0.01571  |
| 11.3  | 100    | 38.7294  | 12066 | 20 | 0.268735 | 0.003736 | 0.02776  |
| 15.7  | 100    | 14.5792  | 4023  | 25 | 0.016919 | 0.009514 | 0.07642  |
| 0.4   | 100    | 140.0325 | 51774 | 35 | 0.004915 | 0        | 0.000135 |
| 18.9  | 100    | 73.1251  | 26886 | 64 | 8.81E-06 | 0        | 4.41E-05 |
| 33.7  | 100    | 95.4321  | 36613 | 66 | 9.97E-06 | 0        | 6.57E-07 |
| 0.5   | 100    | 140.0066 | 51763 | 25 | 0.050426 | 0.000868 | 0.003268 |
| 7.5   | 100    | 52.8546  | 19225 | 34 | 0.017225 | 0.000951 | 0.004473 |
| 2.1   | 100    | 95.2564  | 36532 | 27 | 0.082233 | 0.001758 | 0.009293 |
| 17.1  | 100    | 55.9853  | 22337 | 20 | 0.421643 | 0.002843 | 0.01833  |
| 15.2  | 100    | 52.3501  | 19034 | 18 | 0.590287 | 0.003456 | 0.02431  |
| 40.3  | 100    | 48.4278  | 15625 | 32 | 0.02376  | 0        | 4.08E-05 |
| 13.9  | 100    | 17.5441  | 5557  | 48 | 0.000658 | 0        | 0.000541 |
| 18.7  | 100    | 17.4255  | 4896  | 49 | 0.000464 | 0        | 0.000153 |
| 35    | 100    | 41.6295  | 14759 | 41 | 0.003075 | 0        | 0.000548 |
| 0     | 100    | 14.2605  | 3916  | 59 | 1.87E-05 | 0.000273 | 0.001898 |
| 11.7  | 100    | 17.4375  | 4901  | 42 | 0.002232 | 0.000525 | 0.002574 |
| 157.1 | 100    | 21.3037  | 6754  | 25 | 0.044678 | 0.000525 | 0.002256 |
| 0     | 100    | 42.7366  | 13478 | 57 | 7.38E-05 | 0.000868 | 0.003433 |
| 49.1  | 100    | 17.4755  | 5227  | 30 | 0.036872 | 0.000951 | 0.004386 |
| 31.2  | 100    | 29.7739  | 11205 | 45 | 0.000589 | 0.002257 | 0.0124   |
| 16.2  | 100    | 51.1621  | 16612 | 18 | 0.56988  | 0.006222 | 0.04591  |
| 4.2   | 100    | 105.7324 | 40462 | 34 | 0.005639 | 0        | 0.00022  |
| 2.1   | 100    | 92.0457  | 33705 | 40 | 0.000147 | 0        | 0.00148  |
| 50    | 100    | 72.1026  | 26445 | 61 | 2.58E-06 | 0        | 1.62E-06 |
| 20.8  | 100    | 61.9011  | 22705 | 38 | 0.00577  | 0.001022 | 0.005062 |
| 62.4  | 100    | 61.6623  | 22606 | 20 | 0.418011 | 0.00121  | 0.006776 |
| 1.5   | 100    | 91.5401  | 33530 | 22 | 0.008538 | 0.004803 | 0.03388  |
| 0.3   | 100    | 105.7668 | 40475 | 24 | 0.041936 | 0.005325 | 0.03643  |
| 3.5   | 100    | 61.395   | 22508 | 19 | 0.432064 | 0.009764 | 0.07821  |
| 31.4  | 77.255 | 71.25    | 26382 | 62 | 6.52E-06 | 0        | 1.57E-06 |
| 14.6  | 100    | 70.7463  | 26188 | 42 | 0.000678 | 0        | 0.000274 |
| 71.9  | 100    | 67.0819  | 27078 | 50 | 0.000438 | 0        | 0.000176 |
| 14.8  | 100    | 76.5692  | 28272 | 52 | 0.000166 | 0.000407 | 0.002137 |
| 74.4  | 100    | 77.5421  | 26789 | 42 | 0.001583 | 0.001498 | 0.007876 |
| 125.8 | 71.582 | 78.0431  | 26982 | 43 | 0.001303 | 0.001576 | 0.008154 |
| 42.8  | 100    | 38.5268  | 14849 | 46 | 0.000664 | 0.002079 | 0.01136  |
| 9     | 100    | 68.7889  | 25129 | 42 | 0.001706 | 0.00337  | 0.02315  |
| 12.9  | 100    | 77.6029  | 26812 | 22 | 0.153289 | 0.009436 | 0.07121  |
| 43.4  | 83.507 | 140.9162 | 54769 | 81 | 6.17E-08 | 0        | 4.98E-05 |
| 64.9  | 100    | 109.5931 | 39341 | 80 | 1.07E-07 | 0        | 4.7E-07  |
| 11.6  | 100    | 70.9961  | 24210 | 27 | 0.08719  | 0.001022 | 0.005081 |
| 9.4   | 100    | 109.3417 | 39260 | 29 | 0.013345 | 0.001114 | 0.00643  |
| 180.8 | 82.736 | 44.6091  | 16014 | 43 | 0.00102  | 0.00382  | 0.02785  |
| 6.2   | 100    | 109.0915 | 39176 | 25 | 0.028134 | 0.00861  | 0.06513  |
| 30.4  | 100    | 62.3152  | 22519 | 45 | 0.001283 | 0        | 3.56E-05 |
| 12.2  | 100    | 59.9815  | 24025 | 47 | 0.000801 | 0.000273 | 0.001975 |
| 7.7   | 100    | 17.5011  | 5053  | 33 | 0.002071 | 0.000758 | 0.002872 |
| 45.6  | 100    | 40.6196  | 14248 | 30 | 0.029962 | 0.000951 | 0.004424 |
| 19    | 100    | 37.7807  | 12945 | 46 | 0.000698 | 0.001114 | 0.006217 |

|       |     |          |       |    |          |          |          |
|-------|-----|----------|-------|----|----------|----------|----------|
| 10.9  | 100 | 50.8872  | 18466 | 24 | 0.188628 | 0.00382  | 0.02795  |
| 1.5   | 100 | 96.0684  | 35974 | 43 | 0.002132 | 0        | 0.001065 |
| 7.3   | 100 | 65.7674  | 24197 | 55 | 0.000129 | 0        | 0.000113 |
| 24.9  | 100 | 53.5892  | 19023 | 39 | 0.003032 | 0        | 0.00065  |
| 29.8  | 100 | 48.3666  | 17366 | 38 | 0.007343 | 0.002777 | 0.01701  |
| 0.3   | 100 | 65.7791  | 24202 | 27 | 0.088611 | 0.00337  | 0.02297  |
| 1.7   | 100 | 140.245  | 54465 | 52 | 9.04E-06 | 0        | 1.53E-05 |
| 135.4 | 100 | 27.4884  | 8817  | 36 | 0.006943 | 0        | 0.000114 |
| 20.2  | 100 | 40.4052  | 14267 | 42 | 0.002462 | 0.000758 | 0.003217 |
| 11    | 100 | 58.8799  | 23563 | 25 | 0.096411 | 0.001945 | 0.009926 |
| 11.7  | 100 | 128.1578 | 48741 | 23 | 0.056439 | 0        | 0.000871 |
| 12.8  | 100 | 68.1603  | 25125 | 44 | 0.001643 | 0.000525 | 0.002627 |
| 14.4  | 100 | 68.3014  | 25188 | 26 | 0.093625 | 0.000868 | 0.003359 |
| 18.1  | 100 | 84.5682  | 31503 | 31 | 0.016686 | 0.001758 | 0.009587 |
| 116.2 | 100 | 31.6683  | 11168 | 17 | 0.372747 | 0.002079 | 0.01221  |
| 5.9   | 100 | 124.3954 | 45735 | 47 | 0.000762 | 0        | 0.000213 |
| 2.6   | 100 | 103.4197 | 37066 | 32 | 0.024397 | 0.000868 | 0.003544 |
| 10.6  | 100 | 83.2404  | 29034 | 31 | 0.032923 | 0.001022 | 0.004602 |
| 56.8  | 100 | 22.5653  | 7230  | 20 | 0.037074 | 0.001677 | 0.008912 |
| 4     | 100 | 83.2136  | 29024 | 23 | 0.197793 | 0.008559 | 0.06453  |
| 14.3  | 100 | 76.6978  | 27015 | 39 | 0.004755 | 0        | 0.000919 |
| 7.8   | 100 | 80.5492  | 29635 | 42 | 0.000665 | 0        | 0.000857 |
| 57.2  | 100 | 38.7393  | 13612 | 26 | 0.056355 | 0.000951 | 0.004397 |
| 17.7  | 100 | 18.7837  | 5503  | 16 | 1.09259  | 0.00337  | 0.02164  |
| 13.2  | 100 | 38.6907  | 13592 | 20 | 0.216923 | 0.004803 | 0.03413  |
| 3.1   | 100 | 113.6338 | 42594 | 34 | 0.013336 | 0        | 0.000802 |
| 22.2  | 100 | 98.7279  | 36227 | 46 | 0.000349 | 0        | 0.000889 |
| 2.7   | 100 | 82.5601  | 28748 | 30 | 0.04363  | 0.000273 | 0.001906 |
| 7.5   | 100 | 113.9333 | 43488 | 35 | 0.010905 | 0.000525 | 0.002293 |
| 13.4  | 100 | 62.9015  | 23093 | 46 | 0.001236 | 0        | 0.000318 |
| 73    | 100 | 18.662   | 6086  | 19 | 0.577141 | 0        | 0.000657 |
| 0     | 100 | 109.3979 | 44927 | 22 | 0.255757 | 0.002079 | 0.01141  |
| 17.3  | 100 | 42.1698  | 13276 | 31 | 0.018206 | 0.003892 | 0.0283   |
| 13.4  | 100 | 62.9015  | 23093 | 46 | 0.001236 | 0        | 0.000318 |
| 73    | 100 | 18.662   | 6086  | 19 | 0.577141 | 0        | 0.000657 |
| 0     | 100 | 109.3979 | 44927 | 22 | 0.255757 | 0.002079 | 0.01141  |
| 17.3  | 100 | 42.1698  | 13276 | 31 | 0.018206 | 0.003892 | 0.0283   |
| 6.5   | 100 | 58.8689  | 21566 | 42 | 0.001536 | 0        | 0.000169 |
| 2.7   | 100 | 69.9363  | 28333 | 36 | 0.005275 | 0.000951 | 0.003755 |
| 26.1  | 100 | 49.6113  | 16110 | 17 | 0.844982 | 0.001945 | 0.01016  |
| 65.7  | 100 | 87.6353  | 30786 | 46 | 0.000875 | 0.002079 | 0.01221  |
| 212.6 | 100 | 44.0211  | 13963 | 25 | 0.024571 | 0        | 0.000388 |
| 38    | 100 | 121.742  | 46016 | 45 | 0.00147  | 0.000525 | 0.002649 |
| 20.8  | 100 | 37.7844  | 11732 | 18 | 0.583036 | 0.001945 | 0.01022  |
| 32.9  | 100 | 90.2737  | 32709 | 14 | 0.977648 | 0.00337  | 0.02168  |
| 1.5   | 100 | 101.9061 | 38343 | 44 | 0.001604 | 0        | 0.000877 |
| 144.8 | 100 | 16.454   | 5026  | 26 | 0.048057 | 0.001498 | 0.007717 |
| 2.2   | 100 | 17.4562  | 5035  | 41 | 0.003807 | 0.001945 | 0.01007  |
| 2.2   | 100 | 17.4562  | 5035  | 41 | 0.003807 | 0.001945 | 0.01007  |
| 41.5  | 100 | 21.7222  | 7326  | 36 | 0.009299 | 0.003736 | 0.02687  |
| 2.4   | 100 | 81.8546  | 30994 | 30 | 0.017722 | 0.000758 | 0.003064 |
| 8.4   | 100 | 86.605   | 30359 | 42 | 0.002538 | 0.000868 | 0.003516 |

|       |        |          |       |    |          |          |          |
|-------|--------|----------|-------|----|----------|----------|----------|
| 21.1  | 100    | 24.3935  | 7994  | 16 | 0.370451 | 0.002543 | 0.01607  |
| 8.2   | 100    | 43.2427  | 15475 | 25 | 0.142027 | 0.003254 | 0.021    |
| 79.5  | 100    | 68.4802  | 25264 | 60 | 5.04E-05 | 0        | 1.07E-10 |
| 100.4 | 56.383 | 68.4195  | 25237 | 40 | 0.004552 | 0        | 1.66E-06 |
| 58.6  | 23.98  | 67.9752  | 25056 | 56 | 0.000123 | 0        | 1.51E-09 |
| 60.9  | 11.112 | 67.9068  | 25031 | 41 | 0.003336 | 0        | 1.01E-05 |
| 28.2  | 100    | 67.4712  | 24850 | 55 | 0.000134 | 0        | 6.54E-07 |
| 42.8  | 100    | 140.4495 | 51958 | 83 | 1.13E-07 | 0        | 1.14E-09 |
| 13.3  | 62.764 | 140.4167 | 51942 | 75 | 7.14E-07 | 0        | 2.1E-06  |
| 3.7   | 100    | 139.9244 | 51733 | 37 | 0.00466  | 0        | 0.000978 |
| 0.3   | 100    | 135.3865 | 55520 | 58 | 1.69E-05 | 0        | 0.000114 |
| 23    | 100    | 80.8845  | 32947 | 56 | 7.8E-05  | 0        | 1.82E-05 |
| 28.8  | 100    | 99.0496  | 40682 | 63 | 1.69E-05 | 0        | 2.01E-06 |
| 18.4  | 100    | 98.5372  | 40459 | 71 | 2.45E-06 | 0        | 1.05E-06 |
| 17.4  | 44.707 | 98.4929  | 40440 | 58 | 4.95E-05 | 0        | 3.81E-05 |
| 10.2  | 100    | 93.6122  | 33218 | 63 | 1.76E-05 | 0        | 2.38E-08 |
| 0.4   | 100    | 137.9499 | 54026 | 49 | 0.000258 | 0        | 0.000271 |
| 0.9   | 100    | 93.9485  | 35966 | 59 | 2.65E-05 | 0        | 0.001191 |
| 75.5  | 12.584 | 129.0238 | 49132 | 50 | 0.000398 | 0        | 0.000471 |
| 41.7  | 14.234 | 60.318   | 24179 | 57 | 6.09E-05 | 0        | 0.00013  |
| 27.8  | 100    | 82.4284  | 29476 | 36 | 0.009208 | 0        | 2.4E-06  |
| 24.3  | 11.135 | 81.8922  | 29264 | 64 | 1.61E-05 | 0        | 8.8E-08  |
| 25    | 37.196 | 82.3928  | 29463 | 64 | 1.6E-05  | 0        | 2.11E-08 |
| 17.7  | 43.374 | 81.9237  | 29277 | 60 | 3.65E-05 | 0        | 2.46E-08 |
| 122.9 | 61.841 | 39.9993  | 14111 | 24 | 0.166088 | 0        | 0.000339 |
| 1.3   | 100    | 93.4376  | 35735 | 54 | 0.000108 | 0.000141 | 0.001804 |
| 196.3 | 29.962 | 38.9866  | 13712 | 17 | 0.940458 | 0.000141 | 0.001571 |
| 146.8 | 17.387 | 39.4949  | 13918 | 21 | 0.382031 | 0.000141 | 0.00166  |
| 0.9   | 100    | 139.9017 | 51725 | 33 | 0.011463 | 0.000273 | 0.001857 |
| 79.5  | 100    | 40.5096  | 14307 | 21 | 0.378837 | 0.000273 | 0.002093 |
| 210.4 | 3.963  | 38.4845  | 13519 | 20 | 0.412561 | 0.000868 | 0.003477 |
| 20.4  | 100    | 97.3393  | 37398 | 48 | 0.000343 | 0.000951 | 0.004484 |
| 79.9  | 85.256 | 128.5138 | 48905 | 27 | 0.079526 | 0.001022 | 0.00496  |
| 9     | 100    | 67.8259  | 25003 | 27 | 0.083231 | 0.001022 | 0.005688 |
| 58    | 100    | 39.8452  | 13932 | 17 | 0.846862 | 0.00141  | 0.007295 |
| 25.9  | 36.139 | 60.349   | 24193 | 38 | 0.005377 | 0.001576 | 0.008277 |
| 9.5   | 100    | 67.3233  | 24793 | 17 | 0.977263 | 0.002012 | 0.01079  |
| 16.1  | 100    | 67.4355  | 24835 | 9  | 6.013092 | 0.002777 | 0.01695  |
| 27.1  | 100    | 39.5735  | 13948 | 28 | 0.062791 | 0.003178 | 0.0204   |
| 8     | 100    | 59.8402  | 23964 | 31 | 0.021465 | 0.003178 | 0.02063  |
| 2.3   | 100    | 112.0842 | 41816 | 43 | 0.001136 | 0.003254 | 0.02109  |
| 2.9   | 100    | 74.1449  | 25921 | 35 | 0.013227 | 0.00337  | 0.02246  |
| 4.1   | 100    | 96.8307  | 37181 | 30 | 0.023582 | 0.003892 | 0.02813  |
| 3.7   | 100    | 93.7172  | 33256 | 15 | 1.177691 | 0.006926 | 0.05099  |
| 27.1  | 100    | 39.5735  | 13948 | 28 | 0.062791 | 0.007836 | 0.05686  |
| 3.3   | 100    | 115.6314 | 44616 | 11 | 1.834149 | 0.007969 | 0.05837  |
| 2.5   | 100    | 62.6338  | 22660 | 13 | 2.091418 | 0.009818 | 0.07931  |
| 3     | 100    | 81.3816  | 29043 | 21 | 0.261973 | 0.009858 | 0.08003  |
| 51.9  | 21.696 | 55.4247  | 20254 | 82 | 2.53E-07 | 0        | 2.96E-08 |
| 11    | 100    | 55.2124  | 20173 | 51 | 0.000354 | 0        | 0.000237 |
| 98.4  | 100    | 73.0335  | 24997 | 58 | 6.58E-05 | 0        | 5.59E-06 |
| 26.1  | 79.917 | 73.4464  | 25165 | 71 | 3.03E-06 | 0        | 2.48E-06 |

|       |        |          |       |    |          |          |          |
|-------|--------|----------|-------|----|----------|----------|----------|
| 55.6  | 100    | 73.5343  | 25203 | 59 | 4.72E-05 | 0        | 8.09E-06 |
| 10.4  | 100    | 79.8694  | 29637 | 54 | 0.000155 | 0        | 5.8E-05  |
| 17    | 100    | 80.3755  | 29829 | 82 | 2.35E-07 | 0        | 8.48E-08 |
| 14.4  | 100    | 65.6113  | 23851 | 42 | 0.002258 | 0        | 0.000265 |
| 50.5  | 100    | 65.1101  | 23656 | 35 | 0.013226 | 0        | 0.00016  |
| 15.6  | 100    | 125.6491 | 48848 | 56 | 0.000115 | 0        | 1.87E-06 |
| 3.6   | 100    | 112.7181 | 42092 | 29 | 0.039904 | 0        | 0.000706 |
| 2.6   | 100    | 113.1209 | 42257 | 31 | 0.022456 | 0        | 0.000979 |
| 11    | 100    | 112.614  | 42047 | 44 | 0.001156 | 0        | 4.05E-07 |
| 7.3   | 100    | 126.2449 | 49360 | 48 | 0.000699 | 0        | 2.21E-05 |
| 10.8  | 100    | 126.1125 | 49308 | 69 | 4.65E-06 | 0        | 5.99E-08 |
| 29.7  | 100    | 43.364   | 16892 | 56 | 2.72E-05 | 0        | 0.001211 |
| 12.8  | 100    | 52.8489  | 21002 | 54 | 0.000179 | 0        | 0.001206 |
| 28.7  | 100    | 51.79    | 20537 | 35 | 0.012749 | 0        | 0.000155 |
| 16.6  | 100    | 52.3398  | 20774 | 66 | 1.08E-05 | 0        | 8.87E-05 |
| 16.2  | 100    | 51.8301  | 20555 | 61 | 3.34E-05 | 0        | 0.000185 |
| 10.4  | 94.931 | 53.3526  | 21225 | 49 | 0.000609 | 0.000141 | 0.001565 |
| 1.7   | 100    | 113.6579 | 42493 | 23 | 0.188063 | 0.000273 | 0.001824 |
| 10.2  | 100    | 52.2993  | 20756 | 34 | 0.017672 | 0.000273 | 0.001838 |
| 38.5  | 100    | 52.8003  | 20982 | 29 | 0.050402 | 0.000758 | 0.003159 |
| 12.6  | 100    | 53.9362  | 19161 | 28 | 0.061152 | 0.000951 | 0.003629 |
| 1.3   | 100    | 126.2269 | 49087 | 28 | 0.071156 | 0.001022 | 0.005575 |
| 183.3 | 22.091 | 43.8666  | 17103 | 63 | 5.02E-06 | 0.001022 | 0.004811 |
| 8.8   | 100    | 68.5224  | 25020 | 48 | 0.000669 | 0.001114 | 0.006225 |
| 0.7   | 100    | 125.1428 | 48639 | 16 | 1.197664 | 0.001308 | 0.00705  |
| 0     | 100    | 126.032  | 46388 | 21 | 0.320874 | 0.001758 | 0.009541 |
| 1.9   | 100    | 124.5934 | 48413 | 35 | 0.013117 | 0.002079 | 0.01227  |
| 5.3   | 100    | 81.2286  | 28240 | 20 | 0.399655 | 0.002376 | 0.01498  |
| 3.8   | 100    | 58.0078  | 21234 | 53 | 4.68E-05 | 0.003674 | 0.02645  |
| 0.3   | 100    | 129.0433 | 50271 | 13 | 2.323874 | 0.004192 | 0.03013  |
| 3.3   | 100    | 72.942   | 24958 | 33 | 0.023669 | 0.005618 | 0.0387   |
| 1.7   | 100    | 125.7424 | 49147 | 16 | 1.109329 | 0.006371 | 0.04638  |
| 15.9  | 100    | 50.7685  | 20092 | 21 | 0.33301  | 0.006795 | 0.04974  |
| 7.2   | 100    | 90.4712  | 33795 | 43 | 0.001506 | 0        | 0.000724 |
| 40.2  | 100    | 104.5551 | 39338 | 91 | 2.8E-08  | 0        | 5.08E-09 |
| 22.8  | 62.046 | 104.5218 | 39325 | 62 | 2.45E-05 | 0        | 3.11E-05 |
| 1.7   | 100    | 104.0174 | 39145 | 42 | 0.002321 | 0        | 0.00097  |
| 28.6  | 100    | 56.2473  | 18648 | 36 | 0.008913 | 0        | 0.000126 |
| 112.4 | 47.58  | 55.2042  | 18244 | 45 | 0.001223 | 0        | 3.59E-06 |
| 18    | 100    | 55.2577  | 18267 | 58 | 6.03E-05 | 0        | 5.72E-05 |
| 118.2 | 100    | 55.7243  | 18448 | 38 | 0.005339 | 0        | 3.82E-06 |
| 20.2  | 100    | 62.5019  | 20901 | 40 | 0.003935 | 0        | 4.68E-05 |
| 202.6 | 15.699 | 140.7391 | 55350 | 99 | 3.54E-09 | 0        | 1.19E-11 |
| 35.3  | 4.802  | 140.7376 | 55348 | 89 | 3.13E-08 | 0        | 1.94E-10 |
| 49.1  | 42.897 | 77.0014  | 28454 | 39 | 0.006243 | 0        | 2.92E-06 |
| 114.4 | 77.865 | 76.9224  | 28418 | 61 | 3.62E-05 | 0        | 2.53E-10 |
| 13.5  | 100    | 76.4934  | 28243 | 29 | 0.062797 | 0        | 0.000497 |
| 12.9  | 100    | 140.833  | 52457 | 51 | 0.000218 | 0        | 3.01E-06 |
| 32.8  | 100    | 140.8142 | 52448 | 91 | 2.29E-08 | 0        | 1.33E-10 |
| 0.9   | 100    | 93.9485  | 35966 | 59 | 2.65E-05 | 0        | 0.001191 |
| 75.5  | 12.584 | 129.0238 | 49132 | 50 | 0.000398 | 0        | 0.000471 |
| 122.9 | 61.841 | 39.9993  | 14111 | 24 | 0.166088 | 0        | 0.000339 |

|       |        |          |       |     |          |          |          |
|-------|--------|----------|-------|-----|----------|----------|----------|
| 1.3   | 100    | 93.4376  | 35735 | 54  | 0.000108 | 0.000141 | 0.001804 |
| 196.3 | 29.962 | 38.9866  | 13712 | 17  | 0.940458 | 0.000141 | 0.001571 |
| 12    | 100    | 53.3878  | 17537 | 35  | 0.012853 | 0.000141 | 0.001702 |
| 146.8 | 17.387 | 39.4949  | 13918 | 21  | 0.382031 | 0.000141 | 0.00166  |
| 7.3   | 100    | 89.9657  | 33585 | 36  | 0.007575 | 0.000273 | 0.002053 |
| 79.5  | 100    | 40.5096  | 14307 | 21  | 0.378837 | 0.000273 | 0.002093 |
| 36.8  | 100    | 54.7014  | 18047 | 27  | 0.077531 | 0.000868 | 0.003589 |
| 210.4 | 3.963  | 38.4845  | 13519 | 20  | 0.412561 | 0.000868 | 0.003477 |
| 7     | 100    | 104.0518 | 39157 | 30  | 0.037829 | 0.000951 | 0.004298 |
| 79.9  | 85.256 | 128.5138 | 48905 | 27  | 0.079526 | 0.001022 | 0.00496  |
| 58    | 100    | 39.8452  | 13932 | 17  | 0.846862 | 0.00141  | 0.007295 |
| 5.3   | 100    | 89.4506  | 33378 | 21  | 0.240738 | 0.002376 | 0.01535  |
| 27.1  | 100    | 39.5735  | 13948 | 28  | 0.062791 | 0.003178 | 0.0204   |
| 2.3   | 100    | 112.0842 | 41816 | 43  | 0.001136 | 0.003254 | 0.02109  |
| 7.5   | 100    | 55.7631  | 18464 | 28  | 0.054801 | 0.00337  | 0.02288  |
| 7.5   | 100    | 63.982   | 25769 | 24  | 0.087334 | 0.004643 | 0.03304  |
| 6.3   | 100    | 54.7546  | 18069 | 28  | 0.063451 | 0.005031 | 0.03522  |
| 27.1  | 100    | 39.5735  | 13948 | 28  | 0.062791 | 0.007836 | 0.05686  |
| 28    | 82.083 | 54.6995  | 19957 | 83  | 2.02E-07 | 0        | 5.12E-10 |
| 78.4  | 100    | 54.321   | 19816 | 40  | 0.004599 | 0        | 1.35E-06 |
| 8.9   | 100    | 129.3131 | 47633 | 68  | 6.55E-06 | 0        | 8.67E-08 |
| 8.4   | 100    | 130.8226 | 48239 | 77  | 7.24E-07 | 0        | 1.09E-07 |
| 28    | 77.294 | 129.82   | 47844 | 74  | 1.39E-06 | 0        | 2.9E-08  |
| 21.6  | 97.887 | 130.3213 | 48044 | 78  | 6.61E-07 | 0        | 4.75E-08 |
| 25.8  | 100    | 87.5083  | 32744 | 51  | 0.000359 | 0        | 1.28E-05 |
| 18.2  | 100    | 87.0013  | 32518 | 37  | 0.00915  | 0        | 0.00066  |
| 2.3   | 100    | 127.0867 | 49433 | 39  | 0.005764 | 0        | 0.00079  |
| 14.9  | 100    | 139.7262 | 53767 | 68  | 7.26E-06 | 0        | 4.45E-08 |
| 38.5  | 100    | 139.7126 | 53760 | 90  | 3.97E-08 | 0        | 4.11E-10 |
| 12.3  | 100    | 139.2217 | 53532 | 33  | 0.020711 | 0        | 0.000315 |
| 7.9   | 100    | 76.5268  | 28787 | 86  | 8.11E-08 | 0        | 5.08E-08 |
| 7.5   | 100    | 77.0313  | 28993 | 100 | 2.79E-09 | 0        | 1.36E-10 |
| 2.9   | 100    | 76.0224  | 28577 | 37  | 0.006473 | 0        | 0.00059  |
| 0     | 100    | 128.1006 | 49871 | 34  | 0.019766 | 0.000141 | 0.001597 |
| 25.1  | 100    | 54.824   | 20009 | 18  | 0.728246 | 0.000868 | 0.003596 |
| 1.8   | 100    | 54.196   | 19768 | 32  | 0.028134 | 0.000951 | 0.003838 |
| 10.5  | 100    | 76.1585  | 28630 | 27  | 0.065294 | 0.001576 | 0.008628 |
| 24.1  | 100    | 88.0161  | 32972 | 23  | 0.225976 | 0.002257 | 0.01294  |
| 5     | 100    | 86.4982  | 32301 | 19  | 0.642648 | 0.003533 | 0.0249   |
| 4.1   | 100    | 88.5252  | 33194 | 22  | 0.275694 | 0.005271 | 0.03593  |
| 1     | 100    | 73.5454  | 27533 | 21  | 0.239419 | 0.005618 | 0.03877  |
| 0     | 100    | 127.5921 | 49641 | 17  | 0.895192 | 0.00861  | 0.065    |
| 20.8  | 100    | 45.9077  | 15977 | 69  | 2.69E-06 | 0        | 0.000173 |
| 15.4  | 100    | 37.6595  | 13408 | 64  | 1.13E-05 | 0        | 0.000572 |
| 8.4   | 100    | 100.6661 | 35962 | 62  | 3.34E-05 | 0        | 7.86E-06 |
| 22    | 100    | 100.1648 | 35768 | 54  | 0.000182 | 0        | 1.97E-05 |
| 5.6   | 100    | 103.3487 | 37037 | 35  | 0.012529 | 0        | 2.49E-05 |
| 13    | 41.378 | 80.1619  | 29746 | 89  | 4.88E-08 | 0        | 2.22E-07 |
| 73.1  | 100    | 65.973   | 23997 | 38  | 0.005175 | 0        | 0.000881 |
| 0.3   | 100    | 101.6244 | 38708 | 32  | 0.009717 | 0        | 0.000815 |
| 3.5   | 100    | 125.3552 | 46129 | 22  | 0.199218 | 0.000525 | 0.002217 |
| 0.9   | 100    | 124.3449 | 45714 | 36  | 0.008067 | 0.000525 | 0.002555 |



|       |        |          |       |    |          |          |          |
|-------|--------|----------|-------|----|----------|----------|----------|
| 21.4  | 100    | 31.3358  | 10728 | 32 | 0.015945 | 0.001022 | 0.00522  |
| 0.6   | 100    | 124.8511 | 45914 | 22 | 0.216935 | 0.001022 | 0.005438 |
| 28.8  | 100    | 31.848   | 10926 | 34 | 0.009411 | 0.001022 | 0.005401 |
| 2.1   | 100    | 102.8443 | 36847 | 20 | 0.401029 | 0.002257 | 0.0127   |
| 92.7  | 100    | 45.4742  | 15805 | 29 | 0.032136 | 0.002315 | 0.01346  |
| 6.2   | 100    | 39.3149  | 15169 | 25 | 0.08661  | 0.002543 | 0.01572  |
| 3.7   | 100    | 80.285   | 29791 | 29 | 0.044731 | 0.003736 | 0.02698  |
| 20.5  | 100    | 22.299   | 6908  | 43 | 0.00215  | 0.003736 | 0.02718  |
| 1.3   | 100    | 119.0966 | 44520 | 40 | 0.003033 | 0        | 0.000181 |
| 24.4  | 100    | 67.7032  | 23257 | 23 | 0.228884 | 0        | 2.61E-05 |
| 7.1   | 100    | 112.4138 | 40252 | 67 | 2.47E-07 | 0        | 1.99E-06 |
| 16.1  | 100    | 96.0345  | 35605 | 77 | 1.1E-07  | 0        | 4.49E-07 |
| 6.6   | 100    | 95.5303  | 35427 | 45 | 0.000185 | 0        | 0.000283 |
| 24.3  | 100    | 98.8681  | 36651 | 77 | 3.85E-07 | 0        | 4.22E-07 |
| 23.3  | 100    | 98.7775  | 36618 | 56 | 4.73E-05 | 0        | 7.72E-05 |
| 7.7   | 100    | 98.2749  | 36435 | 61 | 1.61E-05 | 0        | 5.01E-05 |
| 17.2  | 100    | 50.0373  | 19768 | 42 | 0.001075 | 0.000951 | 0.00395  |
| 57.5  | 100    | 32.9842  | 11389 | 39 | 0.00402  | 0.001114 | 0.005873 |
| 1.3   | 100    | 111.9105 | 40084 | 22 | 0.006882 | 0.002257 | 0.01253  |
| 24.3  | 100    | 29.9484  | 11277 | 13 | 1.484461 | 0.002777 | 0.01796  |
| 1.4   | 100    | 77.6495  | 28789 | 40 | 0.003553 | 0        | 0.000176 |
| 46.8  | 100    | 78.1538  | 28971 | 78 | 6.61E-07 | 0        | 1.8E-08  |
| 13    | 100    | 20.3227  | 6383  | 63 | 2.11E-05 | 0        | 0.000125 |
| 44.6  | 100    | 20.2618  | 6360  | 51 | 0.000384 | 0        | 0.000261 |
| 20.5  | 100    | 36.4459  | 12964 | 42 | 0.002441 | 0        | 0.000303 |
| 6.9   | 100    | 76.6455  | 28305 | 66 | 1.08E-05 | 0        | 3.11E-06 |
| 14.3  | 100    | 76.2822  | 28157 | 30 | 0.03608  | 0        | 0.001524 |
| 7.5   | 100    | 23.9423  | 7145  | 31 | 0.026312 | 0        | 0.000409 |
| 20.7  | 100    | 24.1141  | 8872  | 40 | 0.004709 | 0        | 6.16E-06 |
| 47.9  | 100    | 74.8315  | 26219 | 39 | 0.005797 | 0.00065  | 0.002757 |
| 2     | 100    | 76.1426  | 28096 | 25 | 0.13803  | 0.001022 | 0.005126 |
| 72.9  | 100    | 22.957   | 8374  | 23 | 0.173184 | 0.001114 | 0.00643  |
| 6.7   | 100    | 74.9135  | 26256 | 40 | 0.004201 | 0.001114 | 0.005886 |
| 1.1   | 100    | 63.9447  | 21694 | 25 | 0.090849 | 0.002543 | 0.01618  |
| 44.5  | 100    | 75.3335  | 26441 | 22 | 0.2961   | 0.007213 | 0.05274  |
| 7.7   | 100    | 99.2167  | 37214 | 47 | 0.000595 | 0        | 1.53E-05 |
| 61.3  | 88.908 | 99.1318  | 37182 | 67 | 6.35E-06 | 0        | 9.22E-08 |
| 184   | 83.233 | 35.8417  | 12199 | 32 | 0.030685 | 0        | 0.000706 |
| 11.2  | 100    | 44.124   | 15820 | 47 | 0.000352 | 0        | 8.68E-05 |
| 14.2  | 100    | 58.0097  | 20769 | 33 | 0.01952  | 0        | 0.000684 |
| 33.7  | 100    | 58.5146  | 20971 | 60 | 3.45E-05 | 0        | 1.48E-07 |
| 5.8   | 100    | 48.1247  | 18925 | 44 | 0.001924 | 0        | 4.31E-05 |
| 6.8   | 100    | 48.5357  | 19115 | 59 | 5.62E-05 | 0        | 9.16E-06 |
| 11.6  | 100    | 48.022   | 18880 | 41 | 0.003759 | 0.000273 | 0.001828 |
| 2.1   | 100    | 98.7147  | 37011 | 14 | 1.354738 | 0.005325 | 0.03733  |
| 11.9  | 100    | 35.8341  | 12196 | 30 | 0.04373  | 0.009498 | 0.07205  |
| 0     | 100    | 88.3771  | 32969 | 57 | 2.27E-05 | 0        | 8.46E-08 |
| 154.1 | 100    | 50.2359  | 17655 | 57 | 4.1E-05  | 0        | 0.000508 |
| 46.3  | 100    | 117.5633 | 44175 | 78 | 4.11E-07 | 0        | 3.3E-06  |
| 14.7  | 100    | 91.6309  | 33258 | 39 | 0.00356  | 0        | 0.000351 |
| 34.5  | 94.541 | 91.1255  | 33057 | 53 | 0.000146 | 0        | 7.45E-05 |
| 43.1  | 100    | 41.5776  | 16106 | 32 | 0.022183 | 0.000951 | 0.004543 |

|       |        |          |       |    |          |          |          |
|-------|--------|----------|-------|----|----------|----------|----------|
| 302.8 | 84.671 | 18.981   | 6608  | 33 | 0.016814 | 0.000951 | 0.004006 |
| 1.2   | 100    | 56.9556  | 20816 | 35 | 0.010727 | 0.001022 | 0.0052   |
| 33.4  | 100    | 19.0246  | 6630  | 43 | 0.001377 | 0.002079 | 0.0119   |
| 12    | 100    | 86.8666  | 31319 | 15 | 0.918082 | 0.004643 | 0.03336  |
| 13.4  | 100    | 90.6188  | 32859 | 16 | 0.706669 | 0.009858 | 0.08111  |
| 11.6  | 100    | 103.0948 | 39896 | 49 | 0.000541 | 0        | 0.000649 |
| 13    | 75.842 | 102.8782 | 39799 | 49 | 0.000555 | 0        | 5.67E-06 |
| 9.5   | 100    | 102.5952 | 39676 | 48 | 0.000595 | 0        | 0.000531 |
| 19.2  | 100    | 102.3768 | 39575 | 59 | 4.72E-05 | 0        | 1.03E-06 |
| 2.7   | 100    | 103.8873 | 40227 | 45 | 0.001319 | 0        | 0.000287 |
| 14.4  | 78.728 | 103.3825 | 40015 | 58 | 7.09E-05 | 0        | 2.67E-05 |
| 8.8   | 100    | 94.3776  | 36150 | 59 | 3.98E-05 | 0        | 3.29E-06 |
| 13.7  | 100    | 65.661   | 26483 | 51 | 0.000297 | 0        | 6.12E-06 |
| 25.3  | 100    | 58.7667  | 23516 | 56 | 0.000109 | 0        | 2.08E-05 |
| 59.6  | 70.708 | 65.1597  | 26276 | 24 | 0.171759 | 0        | 0.000433 |
| 27.8  | 91.447 | 64.6566  | 26056 | 67 | 8.15E-06 | 0        | 4.11E-06 |
| 67.5  | 100    | 19.6155  | 6898  | 48 | 0.000411 | 0        | 9.61E-05 |
| 3.8   | 100    | 93.874   | 35932 | 24 | 0.124119 | 0.000141 | 0.00167  |
| 7.2   | 100    | 58.7689  | 23517 | 38 | 0.006837 | 0.000758 | 0.002813 |
| 13.9  | 100    | 64.1483  | 25835 | 30 | 0.042355 | 0.000868 | 0.003483 |
| 5.6   | 100    | 20.5268  | 7323  | 21 | 0.310449 | 0.002315 | 0.01378  |
| 6.7   | 100    | 103.5982 | 40102 | 30 | 0.039327 | 0.002543 | 0.0158   |
| 6.7   | 100    | 58.2604  | 23310 | 22 | 0.298753 | 0.002777 | 0.01793  |
| 2.5   | 100    | 64.6607  | 26058 | 29 | 0.054663 | 0.00337  | 0.02168  |
| 22    | 100    | 64.3957  | 21879 | 35 | 0.008589 | 0        | 1.62E-05 |
| 4.4   | 100    | 103.9546 | 37268 | 77 | 7E-07    | 0        | 1.09E-06 |
| 6.3   | 100    | 86.2769  | 31060 | 41 | 0.002292 | 0        | 3.69E-07 |
| 0.5   | 100    | 85.8551  | 30883 | 32 | 0.017171 | 0        | 0.000892 |
| 10.6  | 100    | 86.3651  | 31101 | 17 | 0.632448 | 0.000525 | 0.002349 |
| 1.3   | 100    | 125.0634 | 46619 | 22 | 0.218324 | 0.001854 | 0.009806 |
| 2.3   | 100    | 64.3705  | 21869 | 20 | 0.263865 | 0.002315 | 0.0132   |
| 13    | 100    | 50.4518  | 16437 | 15 | 0.627275 | 0.002315 | 0.01346  |
| 18.5  | 100    | 42.9023  | 14813 | 17 | 0.86333  | 0        | 0.00139  |
| 49.7  | 100    | 43.1511  | 14908 | 25 | 0.111888 | 0        | 9.3E-05  |
| 28.6  | 100    | 43.4067  | 15001 | 13 | 2.020192 | 0        | 0.001448 |
| 18.4  | 100    | 140.1763 | 52108 | 67 | 6.01E-06 | 0        | 4.12E-11 |
| 37.9  | 100    | 66.3641  | 24431 | 49 | 0.000565 | 0.000525 | 0.002625 |
| 35.3  | 100    | 65.862   | 24235 | 48 | 0.00064  | 0.000758 | 0.003066 |
| 3.4   | 100    | 101.2367 | 37330 | 27 | 0.086585 | 0.001498 | 0.007682 |
| 19.8  | 100    | 102.7374 | 39738 | 7  | 2.803667 | 0.002843 | 0.01914  |
| 26    | 100    | 109.6187 | 40781 | 66 | 5.13E-06 | 0        | 0.000186 |
| 7.1   | 100    | 115.2885 | 44921 | 47 | 0.000822 | 0        | 0.000748 |
| 40.5  | 100    | 82.2932  | 30526 | 63 | 7.54E-06 | 0        | 7.23E-05 |
| 16.3  | 92.994 | 56.9317  | 22743 | 39 | 0.004431 | 0        | 0.001032 |
| 14.6  | 100    | 56.8272  | 22701 | 40 | 0.003156 | 0.000141 | 0.001647 |
| 6.9   | 100    | 115.2344 | 44898 | 32 | 0.022516 | 0.000951 | 0.003624 |
| 3.2   | 100    | 82.1692  | 30479 | 31 | 0.014581 | 0.001498 | 0.007761 |
| 68.5  | 100    | 18.5543  | 6402  | 37 | 0.002912 | 0.002543 | 0.01587  |
| 27.8  | 100    | 48.8484  | 17154 | 40 | 0.003086 | 0        | 2.97E-05 |
| 26.5  | 100    | 130.126  | 49609 | 51 | 0.000167 | 0        | 8.7E-05  |
| 15.8  | 100    | 114.2409 | 43616 | 87 | 1.22E-08 | 0        | 0.000264 |
| 11.6  | 100    | 96.4654  | 35285 | 52 | 8.5E-05  | 0        | 0.000965 |

|       |        |          |       |    |          |          |          |
|-------|--------|----------|-------|----|----------|----------|----------|
| 14.2  | 100    | 74.1847  | 25488 | 49 | 0.000211 | 0.000525 | 0.002497 |
| 2.8   | 100    | 113.7294 | 43411 | 61 | 4.74E-06 | 0.000758 | 0.003192 |
| 8.3   | 100    | 130.0814 | 49590 | 35 | 0.007041 | 0.000758 | 0.00311  |
| 3     | 100    | 82.5821  | 30690 | 30 | 0.04597  | 0.001308 | 0.007132 |
| 9.6   | 100    | 123.5173 | 50732 | 50 | 0.000376 | 0        | 0.000998 |
| 25.6  | 100    | 40.6325  | 12746 | 39 | 0.00542  | 0        | 0.000729 |
| 16.2  | 100    | 140.3841 | 54519 | 81 | 2.63E-07 | 0        | 5.36E-11 |
| 31.2  | 100    | 64.1371  | 21777 | 35 | 0.007399 | 0.001022 | 0.004778 |
| 3.6   | 100    | 108.7208 | 42197 | 29 | 0.036458 | 0.001576 | 0.008367 |
| 2.6   | 100    | 77.4727  | 31534 | 52 | 0.000283 | 0        | 0.00012  |
| 13.2  | 100    | 61.3436  | 20462 | 34 | 0.010648 | 0        | 0.001334 |
| 43.7  | 58.739 | 141.1075 | 54494 | 77 | 8.36E-07 | 0        | 2.3E-08  |
| 11.8  | 100    | 61.6778  | 20587 | 36 | 0.005957 | 0.000758 | 0.003188 |
| 6.9   | 100    | 93.6636  | 33237 | 30 | 0.040208 | 0.002315 | 0.01339  |
| 32.1  | 100    | 36.964   | 12947 | 32 | 0.015961 | 0.002376 | 0.01542  |
| 13    | 100    | 93.1627  | 33036 | 19 | 0.530861 | 0.003674 | 0.02596  |
| 7     | 100    | 61.1724  | 20395 | 25 | 0.077992 | 0.004124 | 0.02983  |
| 11.7  | 100    | 114.0058 | 42648 | 37 | 0.007331 | 0        | 0.000047 |
| 70.8  | 100    | 121.6721 | 45985 | 65 | 1.47E-05 | 0        | 4.89E-05 |
| 14    | 85.046 | 72.5279  | 29469 | 54 | 0.000146 | 0        | 4.37E-05 |
| 61.9  | 100    | 30.81    | 10076 | 55 | 6.92E-05 | 0.00065  | 0.002747 |
| 11.8  | 100    | 121.6008 | 45951 | 27 | 0.095495 | 0.001576 | 0.008143 |
| 4.4   | 100    | 113.5003 | 42419 | 22 | 0.276997 | 0.001576 | 0.0081   |
| 114   | 100    | 104.9778 | 38883 | 27 | 0.043355 | 0.003533 | 0.02472  |
| 38.6  | 100    | 37.4313  | 11637 | 39 | 0.005064 | 0        | 0.00033  |
| 21.6  | 100    | 140.899  | 52493 | 84 | 1.9E-07  | 0        | 2.83E-09 |
| 7.9   | 100    | 66.9073  | 24444 | 42 | 0.002027 | 0        | 0.000718 |
| 25.5  | 100    | 81.5196  | 28349 | 31 | 0.029197 | 0.00337  | 0.02272  |
| 0.4   | 100    | 127.2304 | 49493 | 17 | 0.876307 | 0.004643 | 0.03332  |
| 18.6  | 100    | 19.7741  | 5689  | 36 | 0.01091  | 0        | 6.29E-05 |
| 26.2  | 100    | 91.566   | 32398 | 31 | 0.02587  | 0        | 0.000127 |
| 3.6   | 100    | 77.8843  | 28858 | 49 | 0.000472 | 0        | 6.73E-05 |
| 26.6  | 100    | 50.204   | 19844 | 37 | 0.007464 | 0.001022 | 0.005504 |
| 12.1  | 100    | 50.2177  | 19850 | 36 | 0.00916  | 0.001758 | 0.009325 |
| 31.9  | 100    | 77.5162  | 26779 | 18 | 0.375032 | 0.003254 | 0.02113  |
| 5.6   | 100    | 98.971   | 37543 | 56 | 9.58E-05 | 0        | 0.00011  |
| 28.1  | 100    | 58.4162  | 20948 | 43 | 0.001955 | 0        | 0.000142 |
| 12.7  | 100    | 74.4036  | 30266 | 51 | 0.0003   | 0        | 0.000179 |
| 15.1  | 100    | 64.2068  | 23348 | 38 | 0.005357 | 0.000525 | 0.002259 |
| 58.2  | 100    | 38.6899  | 13291 | 38 | 0.000517 | 0.002012 | 0.0104   |
| 14.2  | 100    | 73.9242  | 30072 | 20 | 0.399233 | 0.002777 | 0.01694  |
| 1.4   | 100    | 106.0371 | 39888 | 36 | 0.011662 | 0        | 0.001172 |
| 70    | 100    | 67.4844  | 22844 | 41 | 0.002888 | 0        | 0.000171 |
| 15.8  | 100    | 105.6182 | 37947 | 62 | 2.67E-05 | 0        | 5.94E-05 |
| 19.9  | 100    | 57.2712  | 20469 | 24 | 0.127857 | 0.002012 | 0.01108  |
| 3.4   | 100    | 67.9139  | 24778 | 29 | 0.029532 | 0.003736 | 0.02682  |
| 9     | 100    | 67.8863  | 24768 | 29 | 0.026203 | 0.006721 | 0.0496   |
| 31.9  | 100    | 50.0925  | 16200 | 35 | 0.011393 | 0        | 0.00036  |
| 19.9  | 100    | 39.3013  | 13840 | 36 | 0.009126 | 0.000141 | 0.001735 |
| 173.5 | 100    | 16.8062  | 5197  | 35 | 0.015027 | 0.000273 | 0.002112 |
| 39.1  | 100    | 49.1151  | 17257 | 33 | 0.011    | 0.000525 | 0.002632 |
| 116   | 100    | 45.1784  | 17661 | 56 | 7.39E-05 | 0.000868 | 0.003519 |

|       |        |          |       |    |          |          |          |
|-------|--------|----------|-------|----|----------|----------|----------|
| 36.1  | 100    | 39.8918  | 14069 | 26 | 0.083217 | 0.001308 | 0.006999 |
| 21.8  | 100    | 40.3894  | 14152 | 19 | 0.432354 | 0.00337  | 0.02328  |
| 13.4  | 100    | 62.9015  | 23093 | 46 | 0.001236 | 0        | 0.000318 |
| 73    | 100    | 18.662   | 6086  | 19 | 0.577141 | 0        | 0.000657 |
| 16.1  | 100    | 62.5352  | 23029 | 27 | 0.042997 | 0        | 0.001487 |
| 0     | 100    | 109.3979 | 44927 | 22 | 0.255757 | 0.002079 | 0.01141  |
| 17.3  | 100    | 42.1698  | 13276 | 31 | 0.018206 | 0.003892 | 0.0283   |
| 13.4  | 100    | 62.9015  | 23093 | 46 | 0.001236 | 0        | 0.000318 |
| 73    | 100    | 18.662   | 6086  | 19 | 0.577141 | 0        | 0.000657 |
| 16.1  | 100    | 62.5352  | 23029 | 27 | 0.042997 | 0        | 0.001487 |
| 0     | 100    | 109.3979 | 44927 | 22 | 0.255757 | 0.002079 | 0.01141  |
| 17.3  | 100    | 42.1698  | 13276 | 31 | 0.018206 | 0.003892 | 0.0283   |
| 27.5  | 100    | 76.3248  | 26855 | 43 | 0.000157 | 0        | 3.45E-05 |
| 5.5   | 100    | 62.4476  | 21103 | 33 | 0.016185 | 0.000951 | 0.004542 |
| 13.3  | 100    | 29.8816  | 11248 | 34 | 0.014152 | 0.000951 | 0.00448  |
| 57.1  | 100    | 66.1255  | 24063 | 37 | 0.008384 | 0.002315 | 0.01352  |
| 11.3  | 100    | 86.9952  | 35539 | 32 | 0.019858 | 0.003967 | 0.02867  |
| 136.5 | 42.62  | 42.7956  | 15305 | 34 | 0.011235 | 0        | 0.000676 |
| 128.4 | 38.098 | 56.5524  | 18661 | 81 | 1.77E-07 | 0        | 1.04E-10 |
| 32.5  | 91.42  | 56.529   | 18651 | 94 | 8.47E-09 | 0        | 8.18E-10 |
| 153.3 | 100    | 56.0523  | 18469 | 40 | 0.002274 | 0        | 1.52E-06 |
| 14.3  | 100    | 66.4007  | 22420 | 61 | 2.75E-05 | 0        | 5.34E-05 |
| 161.8 | 37.529 | 65.9704  | 22251 | 56 | 8.64E-05 | 0        | 0.000736 |
| 69.9  | 100    | 65.8921  | 22218 | 74 | 1.53E-06 | 0        | 2E-05    |
| 40    | 100    | 137.9664 | 51097 | 79 | 3.54E-07 | 0        | 6.84E-09 |
| 5     | 100    | 32.578   | 10000 | 97 | 5.35E-09 | 0        | 1.41E-06 |
| 218   | 60.917 | 45.2531  | 15660 | 40 | 0.003666 | 0        | 0.000843 |
| 52.2  | 100    | 116.2611 | 43618 | 46 | 0.000882 | 0        | 0.000708 |
| 15.6  | 100    | 115.7594 | 43412 | 42 | 0.001962 | 0        | 0.000598 |
| 32.3  | 51.95  | 118.5193 | 44604 | 93 | 1.93E-08 | 0        | 3.4E-10  |
| 44.3  | 100    | 60.8018  | 24393 | 34 | 0.017019 | 0        | 0.000113 |
| 39.8  | 32.837 | 61.3013  | 24619 | 54 | 0.000175 | 0        | 3.46E-06 |
| 13.5  | 90.28  | 56.2712  | 22450 | 67 | 8.22E-06 | 0        | 2.61E-06 |
| 57.1  | 100    | 55.7691  | 22241 | 60 | 4.42E-05 | 0        | 3.54E-07 |
| 19.6  | 100    | 42.2908  | 15115 | 27 | 0.05579  | 0.000273 | 0.002107 |
| 0     | 100    | 136.2321 | 52206 | 29 | 0.026509 | 0.000868 | 0.003465 |
| 2.1   | 100    | 90.8906  | 34681 | 44 | 0.000885 | 0.000951 | 0.004187 |
| 62.5  | 3.81   | 61.6254  | 24765 | 27 | 0.073294 | 0.001022 | 0.00542  |
| 14.6  | 100    | 42.8426  | 15324 | 38 | 0.00531  | 0.001576 | 0.008689 |
| 2.2   | 100    | 135.9832 | 52103 | 19 | 0.297089 | 0.002012 | 0.01115  |
| 5.3   | 100    | 61.3658  | 24648 | 30 | 0.048457 | 0.002315 | 0.01337  |
| 50.5  | 100    | 32.2894  | 9900  | 34 | 0.012222 | 0.002543 | 0.01623  |
| 3.4   | 100    | 101.6235 | 37492 | 28 | 0.058758 | 0.00337  | 0.0228   |
| 13.9  | 100    | 61.8522  | 22685 | 23 | 0.213535 | 0.004344 | 0.03128  |
| 5.8   | 100    | 60.8601  | 24421 | 23 | 0.218359 | 0.00728  | 0.05297  |
| 6.1   | 100    | 47.9894  | 15454 | 45 | 0.001234 | 0        | 0.000114 |
| 2.6   | 100    | 49.4564  | 17925 | 62 | 2.59E-05 | 0        | 1.75E-06 |
| 14.8  | 100    | 94.0005  | 33364 | 40 | 0.004031 | 0        | 0.000367 |
| 15.3  | 100    | 93.9898  | 33359 | 44 | 0.001412 | 0        | 0.000568 |
| 27.5  | 100    | 90.7902  | 32069 | 58 | 5.63E-05 | 0        | 1.48E-05 |
| 8.4   | 100    | 89.4578  | 31544 | 43 | 0.001747 | 0        | 0.000924 |
| 74.7  | 2.353  | 93.4972  | 33174 | 43 | 0.002068 | 0        | 0.000443 |

|       |        |          |       |     |          |          |          |
|-------|--------|----------|-------|-----|----------|----------|----------|
| 55.9  | 2.676  | 93.4856  | 33169 | 65  | 1.35E-05 | 0        | 9.61E-06 |
| 9.6   | 100    | 92.9958  | 32965 | 47  | 0.00077  | 0        | 0.000742 |
| 37.6  | 100    | 90.2248  | 33896 | 67  | 8.18E-06 | 0        | 3.71E-06 |
| 81.9  | 13.797 | 140.5206 | 55221 | 24  | 0.126161 | 0        | 3.32E-05 |
| 11.5  | 100    | 88.7781  | 33755 | 76  | 1.02E-06 | 0        | 3E-08    |
| 8.5   | 100    | 89.6973  | 34168 | 46  | 0.000836 | 0        | 0.000771 |
| 21.6  | 6.825  | 88.283   | 33538 | 107 | 8.28E-10 | 0        | 1.65E-10 |
| 12.7  | 1.127  | 88.2707  | 33532 | 84  | 1.62E-07 | 0        | 7.63E-08 |
| 21.4  | 100    | 87.7645  | 33306 | 51  | 0.000375 | 0        | 2.21E-06 |
| 10.3  | 100    | 80.6539  | 30249 | 54  | 0.000191 | 0        | 1.05E-05 |
| 31    | 100    | 47.6281  | 18704 | 54  | 0.000121 | 0        | 0.001297 |
| 7     | 100    | 90.721   | 32043 | 39  | 0.005454 | 0.000273 | 0.001966 |
| 4.9   | 100    | 100.1507 | 35762 | 35  | 0.012963 | 0.000525 | 0.002246 |
| 7.9   | 100    | 93.4007  | 35172 | 55  | 9.79E-05 | 0.000758 | 0.00287  |
| 1.5   | 100    | 133.4642 | 52146 | 22  | 0.233728 | 0.000758 | 0.002896 |
| 29    | 100    | 89.9341  | 33772 | 31  | 0.032867 | 0.001576 | 0.008183 |
| 80.9  | 100    | 47.6882  | 18731 | 42  | 0.002081 | 0.001758 | 0.00925  |
| 7.6   | 100    | 89.2848  | 33987 | 23  | 0.222838 | 0.002543 | 0.01616  |
| 18.8  | 100    | 48.7102  | 19197 | 34  | 0.010588 | 0.003736 | 0.02723  |
| 125.7 | 100    | 43.1906  | 16811 | 39  | 0.004031 | 0.003967 | 0.02884  |
| 144.8 | 6.568  | 48.196   | 18959 | 43  | 0.00157  | 0.00573  | 0.03994  |
| 14.9  | 100    | 49.2256  | 17835 | 28  | 0.047534 | 0.006428 | 0.04719  |
| 2.3   | 100    | 56.9923  | 22768 | 19  | 0.547631 | 0.006926 | 0.05047  |
| 0     | 100    | 90.1814  | 34382 | 20  | 0.335013 | 0.0081   | 0.05957  |
| 5.7   | 100    | 137.1938 | 50734 | 43  | 0.001138 | 0        | 0.000277 |
| 18.2  | 100    | 137.2299 | 50751 | 59  | 2.59E-05 | 0        | 5.37E-07 |
| 17    | 79.665 | 137.6973 | 50968 | 56  | 4.98E-05 | 0        | 2.25E-06 |
| 53.4  | 100    | 137.7428 | 50990 | 85  | 7.07E-08 | 0        | 7.28E-09 |
| 3.7   | 100    | 17.2132  | 4951  | 46  | 5.89E-05 | 0        | 0.001439 |
| 18.8  | 100    | 100.8911 | 38946 | 64  | 1.21E-05 | 0        | 5.44E-06 |
| 15.5  | 100    | 100.5627 | 38798 | 58  | 4.97E-05 | 0        | 3.75E-05 |
| 30.2  | 100    | 52.8174  | 19155 | 51  | 6.39E-05 | 0        | 1.91E-06 |
| 11.6  | 100    | 52.3147  | 18949 | 30  | 0.009418 | 0        | 0.000274 |
| 15.1  | 100    | 45.5901  | 16298 | 66  | 5.89E-07 | 0        | 8.43E-05 |
| 21.5  | 100    | 51.8222  | 20551 | 28  | 0.075391 | 0.000758 | 0.002888 |
| 0.3   | 100    | 45.9531  | 16446 | 54  | 8.6E-06  | 0.000951 | 0.004545 |
| 4.2   | 100    | 17.2476  | 4833  | 39  | 0.000295 | 0.001022 | 0.004642 |
| 0     | 100    | 17.2744  | 4843  | 48  | 3.57E-05 | 0.001022 | 0.00571  |
| 18.1  | 100    | 19.4926  | 5964  | 36  | 0.007415 | 0.001576 | 0.008494 |
| 18.1  | 100    | 19.4926  | 5964  | 37  | 0.006458 | 0.001576 | 0.008111 |
| 22.3  | 100    | 17.2076  | 5106  | 35  | 0.000733 | 0.002012 | 0.01028  |
| 149.4 | 100    | 25.9327  | 8205  | 29  | 0.026764 | 0.002257 | 0.01255  |
| 0.7   | 100    | 17.2318  | 5117  | 43  | 0.000113 | 0.003096 | 0.01998  |
| 25.9  | 100    | 73.4919  | 25633 | 29  | 0.061163 | 0.004643 | 0.03278  |
| 33.9  | 100    | 25.9743  | 8220  | 33  | 0.009051 | 0.00599  | 0.04532  |
| 3.9   | 100    | 110.9783 | 41647 | 40  | 0.004176 | 0        | 0.001535 |
| 7     | 100    | 111.4796 | 41849 | 41  | 0.003119 | 0        | 0.001319 |
| 12.7  | 100    | 140.2549 | 55085 | 40  | 0.004192 | 0        | 2.32E-05 |
| 24.2  | 100    | 15.7655  | 4969  | 43  | 0.001541 | 0        | 0.001246 |
| 153.3 | 17.749 | 15.7488  | 4961  | 29  | 0.038264 | 0        | 0.00088  |
| 204.2 | 100    | 17.9588  | 6101  | 59  | 2.12E-05 | 0        | 1.61E-06 |
| 11.2  | 100    | 79.2814  | 28147 | 40  | 0.004441 | 0        | 0.000831 |

|       |        |          |       |    |          |          |          |
|-------|--------|----------|-------|----|----------|----------|----------|
| 18.5  | 100    | 55.3122  | 20210 | 23 | 0.16199  | 0.000758 | 0.003189 |
| 11.6  | 100    | 111.5108 | 41860 | 43 | 0.001976 | 0.000868 | 0.003363 |
| 8     | 100    | 17.9896  | 6116  | 28 | 0.023237 | 0.00822  | 0.06026  |
| 0     | 100    | 119.6979 | 46316 | 32 | 0.028859 | 0        | 0.00097  |
| 45.6  | 100    | 140.5019 | 52271 | 81 | 3.86E-07 | 0        | 2.85E-08 |
| 33.1  | 100    | 60.7362  | 24366 | 29 | 0.054924 | 0        | 0.001536 |
| 39.2  | 100    | 20.5434  | 6572  | 46 | 0.000108 | 0        | 1.78E-05 |
| 53.2  | 100    | 63.7983  | 21637 | 55 | 9.97E-06 | 0.000868 | 0.003459 |
| 18    | 100    | 33.56    | 12779 | 25 | 0.112088 | 0.001576 | 0.008586 |
| 13.5  | 100    | 140.5139 | 52277 | 18 | 0.872246 | 0.003674 | 0.02548  |
| 10.8  | 100    | 130.5766 | 49812 | 53 | 0.000108 | 0        | 0.000178 |
| 23.5  | 100    | 118.334  | 44519 | 34 | 0.015033 | 0        | 0.000313 |
| 29.6  | 100    | 61.6567  | 22410 | 68 | 5.02E-06 | 0        | 3.14E-06 |
| 26.6  | 100    | 61.1513  | 22216 | 55 | 9.71E-05 | 0        | 2.95E-05 |
| 8.6   | 100    | 60.6409  | 22012 | 43 | 0.001698 | 0.000951 | 0.004486 |
| 8     | 100    | 89.7226  | 34180 | 23 | 0.109928 | 0.00121  | 0.006808 |
| 4.1   | 100    | 78.3761  | 29062 | 27 | 0.074288 | 0.001945 | 0.01003  |
| 15.7  | 100    | 85.9187  | 32061 | 32 | 0.01403  | 0.002843 | 0.01842  |
| 10.1  | 100    | 80.5487  | 29900 | 22 | 0.260427 | 0.004049 | 0.02914  |
| 11.1  | 100    | 49.0932  | 19360 | 26 | 0.05904  | 0.007358 | 0.05342  |
| 7.1   | 100    | 123.0246 | 46574 | 58 | 5.48E-05 | 0        | 5.2E-06  |
| 11.7  | 100    | 115.1847 | 43148 | 44 | 0.000599 | 0        | 0.000729 |
| 14.5  | 100    | 93.66    | 34099 | 35 | 0.004559 | 0        | 2.97E-05 |
| 2.9   | 100    | 99.15    | 36758 | 32 | 0.020334 | 0.00121  | 0.006459 |
| 5     | 100    | 17.4626  | 5038  | 46 | 0.000478 | 0.003674 | 0.02644  |
| 18.1  | 100    | 14.8019  | 4100  | 17 | 0.796785 | 0.003674 | 0.02547  |
| 13.7  | 100    | 132.4872 | 51712 | 60 | 3E-05    | 0        | 1.11E-06 |
| 17.4  | 100    | 79.0972  | 29064 | 44 | 0.00065  | 0        | 0.001135 |
| 16.1  | 100    | 97.4248  | 36859 | 50 | 0.000117 | 0.000951 | 0.003829 |
| 32.2  | 100    | 95.3626  | 35988 | 36 | 0.004155 | 0.00121  | 0.00685  |
| 5.4   | 100    | 75.4899  | 30703 | 24 | 0.119253 | 0.001945 | 0.01018  |
| 8.8   | 100    | 74.0655  | 27443 | 15 | 1.156644 | 0.002315 | 0.01371  |
| 9     | 100    | 135.1742 | 49900 | 54 | 0.000221 | 0        | 0.000194 |
| 23.8  | 100    | 76.6813  | 31206 | 44 | 0.001844 | 0        | 0.001454 |
| 2.7   | 100    | 51.3803  | 16788 | 41 | 0.00273  | 0.000951 | 0.003952 |
| 38.2  | 100    | 51.1902  | 16720 | 23 | 0.177432 | 0.001022 | 0.004628 |
| 55.7  | 100    | 141.0936 | 54486 | 7  | 5.512935 | 0.001758 | 0.009568 |
| 0     | 100    | 134.6692 | 49698 | 35 | 0.016764 | 0.001758 | 0.009424 |
| 110.5 | 100    | 39.8312  | 13926 | 38 | 0.00398  | 0.002376 | 0.01446  |
| 1     | 100    | 68.9828  | 23776 | 29 | 0.058191 | 0.002376 | 0.01429  |
| 5.3   | 100    | 106.2164 | 39406 | 17 | 0.011544 | 0        | 0.000533 |
| 71.9  | 100    | 28.8117  | 9577  | 28 | 0.07736  | 0.000525 | 0.002256 |
| 32.6  | 100    | 43.4486  | 15557 | 28 | 0.063548 | 0.000868 | 0.003511 |
| 12.5  | 100    | 78.5069  | 31974 | 41 | 0.003231 | 0.000951 | 0.004296 |
| 11.5  | 100    | 78.4759  | 31962 | 34 | 0.017976 | 0.00337  | 0.0229   |
| 5.8   | 100    | 103.9452 | 39703 | 24 | 0.033262 | 0.003674 | 0.02567  |
| 6.4   | 100    | 110.4924 | 41150 | 23 | 0.170133 | 0.003736 | 0.02753  |
| 16.1  | 100    | 120.4967 | 45036 | 90 | 1.74E-08 | 0        | 3.73E-10 |
| 36    | 100    | 119.9928 | 44856 | 85 | 4.7E-08  | 0        | 3.7E-12  |
| 31.7  | 100    | 119.4885 | 44666 | 92 | 1.14E-08 | 0        | 4.91E-11 |
| 33.4  | 17.807 | 29.0837  | 10134 | 30 | 0.018833 | 0        | 0.00011  |
| 75    | 28.801 | 61.3312  | 20457 | 46 | 0.001041 | 0        | 2.52E-06 |

|       |        |          |       |    |          |          |          |
|-------|--------|----------|-------|----|----------|----------|----------|
| 8.1   | 100    | 78.1788  | 27034 | 91 | 3.01E-08 | 0        | 4.29E-12 |
| 11.3  | 100    | 77.0674  | 28485 | 40 | 0.004211 | 0        | 0.000211 |
| 32.3  | 100    | 102.2871 | 38997 | 49 | 0.00059  | 0        | 1.23E-07 |
| 6.7   | 100    | 107.5189 | 41221 | 43 | 0.002448 | 0        | 0.000726 |
| 34.1  | 100    | 60.8275  | 20265 | 31 | 0.034747 | 0.000141 | 0.00168  |
| 3.7   | 100    | 101.783  | 38774 | 20 | 0.420585 | 0.000758 | 0.00294  |
| 51.3  | 100    | 29.0399  | 10117 | 9  | 2.77281  | 0.000868 | 0.003397 |
| 20.4  | 100    | 56.639   | 18694 | 35 | 0.014347 | 0.00121  | 0.006599 |
| 11.4  | 100    | 61.0235  | 20338 | 29 | 0.062572 | 0.00121  | 0.006689 |
| 0.4   | 100    | 107.0088 | 40993 | 27 | 0.081239 | 0.001498 | 0.007717 |
| 42.4  | 100    | 17.0988  | 5338  | 38 | 0.004896 | 0.001677 | 0.008929 |
| 3.4   | 100    | 78.2558  | 27064 | 17 | 0.933861 | 0.002012 | 0.01104  |
| 632.9 | 100    | 16.9586  | 5565  | 42 | 0.00188  | 0.002777 | 0.0174   |
| 163.5 | 2.261  | 16.9655  | 5570  | 44 | 0.001336 | 0.00337  | 0.02395  |
| 0     | 100    | 102.371  | 39036 | 22 | 0.307548 | 0.003674 | 0.0265   |
| 198.9 | 100    | 17.0901  | 5334  | 26 | 0.08779  | 0.008171 | 0.05995  |
| 6.6   | 100    | 77.7533  | 26871 | 19 | 0.559569 | 0.008361 | 0.06236  |
| 4     | 100    | 32.0657  | 9770  | 64 | 1.09E-05 | 0        | 2.49E-06 |
| 68.9  | 100    | 24.9659  | 8595  | 20 | 0.212201 | 0        | 0.001013 |
| 62    | 67.859 | 76.9715  | 26573 | 43 | 0.002084 | 0        | 8.2E-08  |
| 17    | 100    | 73.1782  | 25054 | 39 | 0.004273 | 0        | 0.000478 |
| 19.8  | 100    | 73.1669  | 27098 | 26 | 0.072692 | 0        | 0.000525 |
| 6.3   | 88.575 | 73.6697  | 27318 | 71 | 2.55E-06 | 0        | 6.35E-08 |
| 11.3  | 100    | 137.6248 | 52809 | 53 | 0.000204 | 0        | 1.52E-07 |
| 39.1  | 100    | 97.0872  | 35541 | 66 | 1.27E-05 | 0        | 2.83E-05 |
| 23.1  | 100    | 32.3884  | 12302 | 63 | 1.66E-05 | 0        | 2.22E-07 |
| 71    | 100    | 46.9287  | 16906 | 57 | 7.84E-05 | 0.000868 | 0.00352  |
| 189.9 | 100    | 47.4365  | 17105 | 57 | 7.17E-05 | 0.001022 | 0.005795 |
| 32.5  | 100    | 90.2841  | 32714 | 47 | 0.000663 | 0.001114 | 0.006108 |
| 10.6  | 100    | 79.0452  | 28049 | 27 | 0.092522 | 0.001677 | 0.008941 |
| 4.1   | 100    | 107.2705 | 39838 | 25 | 0.06507  | 0.002079 | 0.01218  |
| 4     | 100    | 107.7775 | 40043 | 22 | 0.127678 | 0.002843 | 0.01867  |
| 12.5  | 100    | 36.5171  | 14025 | 52 | 0.000207 | 0.002843 | 0.01833  |
| 13.8  | 100    | 70.249   | 24293 | 21 | 0.346777 | 0.004344 | 0.03155  |
| 11.5  | 100    | 88.9242  | 33180 | 41 | 0.002694 | 0        | 0.001308 |
| 55.1  | 20.145 | 88.4078  | 32983 | 57 | 6.97E-05 | 0        | 5.15E-05 |
| 105.7 | 3.53   | 87.9058  | 32773 | 51 | 0.000244 | 0        | 0.000737 |
| 4     | 100    | 83.3846  | 33969 | 73 | 9.17E-07 | 0        | 0.000134 |
| 214   | 28.094 | 17.4912  | 5851  | 39 | 0.001751 | 0        | 5.72E-05 |
| 19.9  | 100    | 76.1665  | 28634 | 65 | 1.03E-05 | 0        | 0.000138 |
| 28.9  | 100    | 75.1477  | 28198 | 64 | 1.14E-05 | 0        | 6.93E-05 |
| 109.3 | 1.895  | 74.6382  | 27977 | 63 | 1.46E-05 | 0        | 0.000122 |
| 121.1 | 2.38   | 74.3511  | 27868 | 69 | 3.84E-06 | 0        | 0.000104 |
| 81.2  | 36.034 | 48.1625  | 18944 | 40 | 0.002977 | 0        | 1.99E-05 |
| 30.1  | 100    | 47.6427  | 18711 | 38 | 0.005507 | 0        | 0.000825 |
| 15.5  | 100    | 13.6646  | 3716  | 39 | 0.004694 | 0.001022 | 0.00534  |
| 13.3  | 100    | 17.5092  | 5861  | 52 | 8.69E-05 | 0.001022 | 0.004787 |
| 72.3  | 16.753 | 88.4177  | 32987 | 34 | 0.01396  | 0.001114 | 0.005998 |
| 13.7  | 100    | 82.3981  | 30620 | 42 | 0.001805 | 0.00121  | 0.006584 |
| 61.4  | 22.582 | 74.6893  | 27999 | 38 | 0.005075 | 0.00121  | 0.006751 |
| 59.5  | 100    | 30.378   | 10194 | 55 | 8.51E-05 | 0.001498 | 0.007672 |
| 21.5  | 100    | 18.0118  | 5243  | 18 | 0.543264 | 0.001945 | 0.01005  |

|       |        |          |       |    |          |          |          |
|-------|--------|----------|-------|----|----------|----------|----------|
| 112.8 | 2.658  | 87.9159  | 32778 | 34 | 0.014839 | 0.002315 | 0.01322  |
| 30.1  | 92.798 | 70.0459  | 25640 | 51 | 0.000136 | 0.002376 | 0.01534  |
| 34.4  | 100    | 79.3611  | 28180 | 14 | 1.359536 | 0.002376 | 0.01424  |
| 73.5  | 100    | 30.6093  | 10429 | 43 | 0.001417 | 0.002843 | 0.01842  |
| 9.8   | 100    | 87.4044  | 32563 | 22 | 0.180895 | 0.00337  | 0.02199  |
| 10.2  | 100    | 86.3189  | 30231 | 16 | 0.752577 | 0.003892 | 0.02839  |
| 11.9  | 100    | 75.6563  | 28413 | 32 | 0.02293  | 0.005271 | 0.03573  |
| 21.5  | 100    | 18.0118  | 5243  | 18 | 0.543264 | 0.006721 | 0.04933  |
| 41.6  | 100    | 31.113   | 10637 | 37 | 0.005464 | 0.006926 | 0.05078  |
| 14.5  | 100    | 85.1751  | 31677 | 33 | 0.01027  | 0.006991 | 0.0515   |
| 7     | 100    | 115.0378 | 43104 | 51 | 0.000254 | 0        | 0.00024  |
| 79.9  | 81.873 | 51.8639  | 18850 | 40 | 0.00301  | 0        | 0.000225 |
| 15.2  | 100    | 52.9756  | 19272 | 46 | 0.000635 | 0        | 0.00039  |
| 11.4  | 100    | 52.5359  | 19106 | 54 | 9.98E-05 | 0        | 0.00026  |
| 6     | 100    | 137.3458 | 50803 | 41 | 0.001671 | 0        | 0.001387 |
| 1     | 100    | 136.8185 | 50579 | 43 | 0.000878 | 0.000141 | 0.00158  |
| 26.9  | 100    | 39.2271  | 13286 | 52 | 0.000265 | 0.000758 | 0.002823 |
| 10.4  | 100    | 115.309  | 43196 | 34 | 0.013765 | 0.000951 | 0.0043   |
| 98.3  | 70.344 | 86.6203  | 32240 | 43 | 0.001946 | 0.001576 | 0.008521 |
| 2.5   | 100    | 86.2692  | 32099 | 31 | 0.028165 | 0.002376 | 0.01429  |
| 79.2  | 100    | 40.4817  | 13950 | 29 | 0.030175 | 0.002777 | 0.01714  |
| 51.4  | 100    | 25.2772  | 8183  | 44 | 0.001282 | 0.003254 | 0.02111  |
| 12.8  | 100    | 37.6375  | 13400 | 37 | 0.002635 | 0.00337  | 0.02352  |
| 41.9  | 100    | 86.1143  | 32036 | 31 | 0.027772 | 0.003892 | 0.02806  |
| 15.8  | 100    | 51.3592  | 18651 | 19 | 0.422211 | 0.003967 | 0.02884  |
| 5.3   | 100    | 92.6248  | 34594 | 29 | 0.05622  | 0        | 0.000571 |
| 6.1   | 100    | 135.9466 | 55719 | 35 | 0.012508 | 0        | 0.000186 |
| 21.5  | 100    | 82.4489  | 33583 | 60 | 2.98E-05 | 0        | 1.71E-05 |
| 26.4  | 100    | 82.3978  | 33558 | 48 | 0.000392 | 0        | 0.000274 |
| 2.4   | 100    | 99.5292  | 35513 | 44 | 0.001527 | 0        | 0.000584 |
| 7.8   | 100    | 64.6269  | 23456 | 45 | 0.001394 | 0        | 0.000619 |
| 291.3 | 88.834 | 17.9704  | 5761  | 30 | 0.027286 | 0.000407 | 0.002156 |
| 4.3   | 100    | 82.2476  | 33497 | 33 | 0.013642 | 0.00121  | 0.006511 |
| 1.6   | 100    | 92.167   | 34421 | 28 | 0.074287 | 0.00141  | 0.007328 |
| 58    | 100    | 47.6305  | 16657 | 19 | 0.635684 | 0.001498 | 0.007531 |
| 1.4   | 100    | 99.0165  | 35313 | 32 | 0.022356 | 0.001498 | 0.007528 |
| 9.1   | 71.294 | 83.7071  | 31107 | 58 | 6.26E-05 | 0        | 2.29E-07 |
| 43.4  | 100    | 46.4074  | 18212 | 27 | 0.076038 | 0        | 0.001271 |
| 32.2  | 100    | 24.7965  | 8153  | 19 | 0.1632   | 0        | 0.00097  |
| 132   | 70.019 | 84.1472  | 30161 | 45 | 0.001022 | 0.000141 | 0.001665 |
| 1.9   | 100    | 82.5985  | 30708 | 25 | 0.144123 | 0.000273 | 0.00208  |
| 61.7  | 100    | 45.9754  | 15953 | 33 | 0.017576 | 0.000951 | 0.003743 |
| 4.3   | 100    | 83.2031  | 30920 | 16 | 0.977634 | 0.001114 | 0.0061   |
| 59    | 100    | 15.1256  | 4248  | 31 | 0.022048 | 0.002376 | 0.01517  |
| 0.4   | 100    | 82.096   | 30510 | 13 | 1.91797  | 0.004424 | 0.03169  |
| 2.8   | 100    | 83.6883  | 31523 | 15 | 0.477326 | 0.004643 | 0.03314  |
| 16.2  | 100    | 15.1821  | 4270  | 37 | 0.005492 | 0.006222 | 0.04609  |
| 2.2   | 100    | 133.0226 | 54592 | 41 | 0.003126 | 0        | 0.00014  |
| 37.6  | 100    | 41.1915  | 14218 | 35 | 0.011782 | 0.000273 | 0.001857 |
| 41.8  | 100    | 60.8174  | 21960 | 7  | 6.864832 | 0.000868 | 0.003551 |
| 6     | 100    | 54.0388  | 21507 | 26 | 0.0324   | 0.001308 | 0.006885 |
| 34.6  | 100    | 66.1089  | 24335 | 25 | 0.113507 | 0.002079 | 0.01177  |



|       |        |          |       |    |          |          |          |
|-------|--------|----------|-------|----|----------|----------|----------|
| 12.5  | 100    | 87.967   | 32950 | 21 | 0.398302 | 0.002376 | 0.01422  |
| 0.4   | 100    | 108.5492 | 42130 | 25 | 0.114888 | 0.00337  | 0.02236  |
| 50    | 100    | 38.011   | 13033 | 27 | 0.024215 | 0        | 0.00085  |
| 75.1  | 3.187  | 37.5093  | 12847 | 24 | 0.046568 | 0        | 0.000269 |
| 100.8 | 24.409 | 37.441   | 12819 | 25 | 0.042071 | 0        | 0.000148 |
| 106.6 | 11.673 | 37.0037  | 12651 | 26 | 0.030038 | 0        | 0.000372 |
| 38.6  | 15.936 | 141.0471 | 52572 | 88 | 3.97E-08 | 0        | 2.86E-08 |
| 1.4   | 100    | 141.057  | 52577 | 92 | 1.77E-08 | 0        | 1.16E-07 |
| 199.4 | 31.711 | 140.983  | 52538 | 88 | 5.7E-08  | 0        | 5.02E-11 |
| 37.2  | 85.652 | 54.4155  | 19362 | 30 | 0.033166 | 0        | 0.000531 |
| 44.9  | 99.842 | 53.9164  | 19168 | 31 | 0.025574 | 0        | 0.000186 |
| 5.3   | 69.748 | 141.671  | 54827 | 42 | 0.002369 | 0        | 5.44E-06 |
| 67.8  | 100    | 52.0155  | 18787 | 57 | 8.92E-05 | 0        | 0.000445 |
| 70.6  | 2.515  | 51.5123  | 18591 | 71 | 4.08E-06 | 0        | 0.000393 |
| 112.1 | 0.646  | 50.5008  | 18190 | 56 | 0.000116 | 0        | 0.001436 |
| 89.4  | 3.284  | 51.0062  | 18393 | 65 | 1.42E-05 | 0        | 0.000367 |
| 74.5  | 5.266  | 51.0068  | 18394 | 44 | 0.001901 | 0        | 0.001518 |
| 32.8  | 100    | 52.5184  | 18982 | 51 | 0.000341 | 0        | 0.001088 |
| 24.9  | 100    | 53.021   | 19170 | 54 | 0.000179 | 0        | 0.000652 |
| 18.5  | 100    | 54.0329  | 19542 | 54 | 0.000189 | 0        | 0.000956 |
| 42.3  | 100    | 49.9975  | 18000 | 54 | 0.000162 | 0        | 0.000511 |
| 5.8   | 27.548 | 142.8874 | 55531 | 42 | 0.002917 | 0        | 1.08E-07 |
| 31.3  | 100    | 140.9078 | 54375 | 36 | 0.00925  | 0        | 1.11E-05 |
| 38.9  | 100    | 43.1347  | 15344 | 60 | 2.82E-05 | 0.000141 | 0.001599 |
| 40.6  | 100    | 44.3989  | 15309 | 36 | 0.009938 | 0.000273 | 0.002081 |
| 30.9  | 67.803 | 42.6293  | 15152 | 59 | 3.95E-05 | 0.000525 | 0.002553 |
| 22    | 100    | 53.5227  | 19353 | 53 | 0.000197 | 0.000525 | 0.002256 |
| 20.8  | 100    | 57.2706  | 20735 | 45 | 0.00128  | 0.000525 | 0.002409 |
| 41    | 100    | 55.981   | 22335 | 42 | 0.001096 | 0.000525 | 0.002454 |
| 99.9  | 1.088  | 50.5014  | 18191 | 38 | 0.008166 | 0.000951 | 0.003665 |
| 34.1  | 100    | 54.2884  | 19641 | 29 | 0.050728 | 0.001022 | 0.005519 |
| 25.1  | 100    | 38.5168  | 13226 | 19 | 0.164851 | 0.001022 | 0.005769 |
| 34.8  | 100    | 38.621   | 12047 | 22 | 0.075681 | 0.001022 | 0.005079 |
| 89.2  | 3.381  | 51.513   | 18592 | 38 | 0.008045 | 0.001022 | 0.004931 |
| 24.2  | 53.677 | 37.4424  | 12820 | 39 | 0.001683 | 0.001114 | 0.006235 |
| 17.3  | 100    | 56.5222  | 22569 | 31 | 0.016949 | 0.00121  | 0.006757 |
| 8.5   | 100    | 55.0074  | 21931 | 33 | 0.009245 | 0.001308 | 0.006967 |
| 49.5  | 90.933 | 140.4956 | 55208 | 16 | 0.836322 | 0.001498 | 0.007699 |
| 14.4  | 100    | 36.4285  | 12957 | 40 | 0.001712 | 0.001498 | 0.007577 |
| 17.4  | 100    | 38.431   | 13684 | 25 | 0.038814 | 0.001498 | 0.007941 |
| 14.4  | 100    | 36.4285  | 12957 | 40 | 0.001712 | 0.001498 | 0.007577 |
| 19.6  | 100    | 53.0326  | 19174 | 34 | 0.015393 | 0.001758 | 0.009267 |
| 169.5 | 1.369  | 55.3552  | 22071 | 50 | 0.000214 | 0.001854 | 0.009717 |
| 63.7  | 100    | 52.0217  | 18790 | 28 | 0.062617 | 0.002079 | 0.0121   |
| 22.4  | 100    | 33.0851  | 11172 | 22 | 0.129522 | 0.002257 | 0.01277  |
| 16.8  | 100    | 51.257   | 20307 | 41 | 0.001583 | 0.002315 | 0.01393  |
| 0     | 100    | 142.925  | 55557 | 30 | 0.040547 | 0.002315 | 0.01416  |
| 26    | 100    | 28.7063  | 9535  | 17 | 0.053599 | 0.002777 | 0.01816  |
| 37.3  | 3.554  | 55.5119  | 22141 | 31 | 0.020272 | 0.002843 | 0.01869  |
| 27.8  | 100    | 54.826   | 19832 | 29 | 0.056656 | 0.00337  | 0.02269  |
| 40.4  | 100    | 41.5078  | 14335 | 17 | 0.236273 | 0.00362  | 0.02497  |
| 149.8 | 1.304  | 55.4774  | 22124 | 42 | 0.001353 | 0.003736 | 0.02677  |

|       |        |          |       |     |          |          |          |
|-------|--------|----------|-------|-----|----------|----------|----------|
| 181   | 100    | 53.8751  | 19155 | 8   | 4.551777 | 0.004124 | 0.02965  |
| 55.2  | 100    | 51.425   | 18583 | 26  | 0.103432 | 0.004124 | 0.02929  |
| 41.4  | 100    | 42.4031  | 14634 | 17  | 0.238774 | 0.004266 | 0.03075  |
| 27.3  | 100    | 39.0795  | 13437 | 14  | 0.440923 | 0.005031 | 0.03519  |
| 22.9  | 100    | 55.5489  | 20092 | 30  | 0.047477 | 0.005114 | 0.03544  |
| 18.3  | 100    | 39.5911  | 13620 | 16  | 0.31841  | 0.00573  | 0.0402   |
| 27.4  | 100    | 52.5287  | 18987 | 29  | 0.052681 | 0.005792 | 0.04224  |
| 13.8  | 100    | 56.4882  | 22553 | 29  | 0.023703 | 0.007423 | 0.05398  |
| 22.3  | 100    | 44.2537  | 15246 | 24  | 0.173952 | 0.007636 | 0.05483  |
| 22.3  | 100    | 44.2537  | 15246 | 24  | 0.173952 | 0.007636 | 0.05483  |
| 96.2  | 100    | 50.109   | 17600 | 24  | 0.185987 | 0.008962 | 0.06775  |
| 23.9  | 100    | 52.8547  | 21005 | 35  | 0.005577 | 0.009818 | 0.07916  |
| 27.5  | 100    | 53.5361  | 19358 | 22  | 0.246977 | 0.009858 | 0.08106  |
| 100.8 | 24.605 | 64.5538  | 23728 | 48  | 0.000413 | 0        | 0.000899 |
| 35    | 100    | 38.1495  | 11873 | 54  | 9.92E-05 | 0        | 0.000277 |
| 131.4 | 64.436 | 38.0925  | 11854 | 45  | 0.000754 | 0        | 0.000241 |
| 34.4  | 37.971 | 98.8038  | 35233 | 63  | 1.44E-05 | 0        | 1.54E-07 |
| 228.2 | 30.671 | 17.6612  | 5948  | 65  | 1.39E-05 | 0        | 9.75E-06 |
| 61.2  | 100    | 140.3448 | 54064 | 100 | 2.81E-09 | 0        | 1.97E-13 |
| 60.2  | 100    | 140.3404 | 54062 | 62  | 1.59E-05 | 0        | 6.09E-10 |
| 73.5  | 100    | 45.3813  | 15714 | 36  | 0.011316 | 0        | 8.52E-05 |
| 146.4 | 33.958 | 141.0257 | 54445 | 66  | 7.44E-06 | 0        | 1.53E-08 |
| 47.5  | 100    | 61.9851  | 24922 | 50  | 0.000176 | 0        | 0.00027  |
| 4.9   | 100    | 77.6478  | 28744 | 32  | 0.027476 | 0.000951 | 0.004419 |
| 18.3  | 100    | 35.6722  | 10998 | 31  | 0.019237 | 0.000951 | 0.004162 |
| 39.2  | 100    | 37.5896  | 11688 | 27  | 0.048728 | 0.00121  | 0.006481 |
| 3.6   | 100    | 57.8041  | 23117 | 47  | 0.000291 | 0.001498 | 0.007955 |
| 7.9   | 100    | 98.5944  | 35154 | 17  | 0.586302 | 0.001758 | 0.009613 |
| 5.7   | 100    | 78.4924  | 27157 | 16  | 1.055062 | 0.004581 | 0.03259  |
| 8.8   | 100    | 37.6474  | 11708 | 28  | 0.038175 | 0.00599  | 0.04486  |
| 2     | 100    | 33.442   | 10228 | 79  | 2.14E-07 | 0        | 5.44E-06 |
| 47.4  | 100    | 34.4253  | 11668 | 25  | 0.042094 | 0        | 0.000754 |
| 18.2  | 100    | 35.4055  | 10906 | 35  | 0.005268 | 0        | 0.000852 |
| 37.9  | 100    | 35.9457  | 12786 | 40  | 0.002753 | 0        | 0.000584 |
| 31    | 100    | 140.6321 | 55290 | 109 | 5.41E-10 | 0        | 1.74E-12 |
| 119.3 | 100    | 36.8131  | 11431 | 39  | 0.001371 | 0        | 0.000117 |
| 18.6  | 100    | 36.4021  | 11293 | 60  | 1.3E-05  | 0        | 0.000105 |
| 17    | 100    | 50.7639  | 20090 | 59  | 4.3E-05  | 0        | 0.000625 |
| 14.8  | 100    | 30.8289  | 10517 | 50  | 0.000116 | 0        | 0.000132 |
| 7.5   | 100    | 56.5877  | 21175 | 37  | 0.002741 | 0        | 0.000921 |
| 13.8  | 100    | 101.9283 | 36482 | 38  | 0.006731 | 0.000141 | 0.001623 |
| 6.4   | 100    | 133.5308 | 51045 | 39  | 0.005494 | 0.000758 | 0.003008 |
| 13.3  | 100    | 33.3653  | 10204 | 45  | 0.00056  | 0.000868 | 0.003398 |
| 0.8   | 100    | 100.3211 | 36947 | 34  | 0.013252 | 0.001022 | 0.004748 |
| 4.3   | 100    | 133.0267 | 50825 | 21  | 0.383249 | 0.006721 | 0.04928  |
| 2.6   | 100    | 101.9575 | 36495 | 25  | 0.109747 | 0.007636 | 0.05518  |
| 14.8  | 100    | 120.2427 | 44945 | 80  | 3.2E-07  | 0        | 5.86E-09 |
| 31.9  | 100    | 119.7383 | 44763 | 76  | 7.92E-07 | 0        | 1.19E-08 |
| 19.6  | 100    | 20.5148  | 6842  | 53  | 0.000166 | 0        | 0.001165 |
| 104.6 | 48.425 | 140.6586 | 54226 | 91  | 1.5E-08  | 0        | 1.97E-08 |
| 17.2  | 100    | 80.0733  | 29992 | 44  | 0.001648 | 0        | 2.65E-05 |
| 48.2  | 66.033 | 141.4243 | 54687 | 101 | 1.23E-10 | 0        | 2.6E-12  |

|       |        |          |       |     |          |          |          |
|-------|--------|----------|-------|-----|----------|----------|----------|
| 11.7  | 100    | 66.4021  | 22726 | 5   | 12.04597 | 0.000273 | 0.001916 |
| 12    | 100    | 66.9021  | 22934 | 10  | 3.901145 | 0.001022 | 0.004749 |
| 427   | 100    | 21.6583  | 7804  | 23  | 0.151315 | 0.00121  | 0.006544 |
| 31.9  | 100    | 137.4345 | 50845 | 26  | 0.06706  | 0.002177 | 0.01237  |
| 15.6  | 100    | 21.5356  | 7252  | 29  | 0.036733 | 0.007836 | 0.05606  |
| 19.3  | 100    | 74.4858  | 25606 | 42  | 0.002559 | 0        | 7.08E-06 |
| 24    | 100    | 86.6148  | 30363 | 31  | 0.028185 | 0        | 0.001149 |
| 47.3  | 57.426 | 86.1141  | 30142 | 51  | 0.000324 | 0        | 8.49E-06 |
| 7.1   | 100    | 85.6104  | 29940 | 44  | 0.001446 | 0        | 0.000255 |
| 8     | 100    | 86.2328  | 30193 | 44  | 0.001395 | 0        | 9.38E-05 |
| 2     | 100    | 132.7655 | 50722 | 33  | 0.02374  | 0        | 0.000355 |
| 35.8  | 94.559 | 141.038  | 54453 | 27  | 0.072323 | 0        | 1.97E-06 |
| 50.6  | 14.87  | 34.2074  | 13047 | 63  | 1.65E-05 | 0        | 6.6E-05  |
| 6.9   | 100    | 87.1187  | 30575 | 36  | 0.009716 | 0.000273 | 0.002098 |
| 40.3  | 92.422 | 34.1874  | 13039 | 38  | 0.005668 | 0.00065  | 0.002765 |
| 38.4  | 36.327 | 77.5443  | 28809 | 48  | 6.58E-05 | 0.000758 | 0.002791 |
| 2.5   | 100    | 132.2643 | 50512 | 14  | 1.916305 | 0.002079 | 0.01134  |
| 266   | 100    | 23.2404  | 7548  | 11  | 2.941853 | 0.002079 | 0.01233  |
| 281   | 52.425 | 22.733   | 7365  | 11  | 2.90892  | 0.002843 | 0.01903  |
| 15.9  | 100    | 77.0382  | 28619 | 28  | 0.005587 | 0.00337  | 0.02313  |
| 7.5   | 100    | 54.8787  | 18013 | 49  | 0.000182 | 0.003674 | 0.02519  |
| 9.6   | 100    | 64.6812  | 23545 | 37  | 0.005962 | 0.003674 | 0.02629  |
| 11    | 100    | 102.3096 | 36639 | 28  | 0.075043 | 0        | 0.00054  |
| 50    | 100    | 34.8932  | 11971 | 32  | 0.010466 | 0        | 0.000655 |
| 25.8  | 100    | 96.7312  | 37006 | 84  | 1.39E-07 | 0        | 7.23E-10 |
| 19.8  | 100    | 74.5237  | 27356 | 109 | 2.73E-11 | 0        | 9.28E-10 |
| 1.8   | 100    | 74.0225  | 27172 | 41  | 0.000171 | 0        | 0.00019  |
| 21.6  | 100    | 32.9084  | 10858 | 19  | 0.258604 | 0.001022 | 0.005014 |
| 10    | 100    | 66.2028  | 24178 | 30  | 0.004732 | 0.001022 | 0.005109 |
| 0     | 100    | 83.4476  | 31011 | 20  | 0.068049 | 0.001022 | 0.005522 |
| 193.9 | 100    | 17.3918  | 5800  | 18  | 0.049019 | 0.002012 | 0.01053  |
| 15.8  | 100    | 39.7033  | 13877 | 31  | 0.035028 | 0.002719 | 0.01681  |
| 0.5   | 100    | 75.0309  | 27539 | 15  | 0.078536 | 0.004344 | 0.0316   |
| 107.9 | 100    | 39.7584  | 13898 | 31  | 0.034454 | 0.005031 | 0.03487  |
| 17.4  | 100    | 40.2906  | 14370 | 44  | 0.000939 | 0        | 0.000555 |
| 43.5  | 100    | 76.7125  | 26472 | 50  | 0.000306 | 0        | 0.000138 |
| 7.2   | 100    | 63.8631  | 23146 | 31  | 0.034977 | 0        | 0.000215 |
| 52.6  | 100    | 17.3598  | 5782  | 49  | 0.00026  | 0        | 5.43E-06 |
| 56.2  | 100    | 76.3815  | 26344 | 43  | 0.001637 | 0.00065  | 0.002703 |
| 15.1  | 100    | 63.3628  | 22949 | 11  | 3.521782 | 0.00065  | 0.002696 |
| 11.3  | 100    | 52.1179  | 18863 | 32  | 0.017268 | 0.001022 | 0.005559 |
| 22.1  | 100    | 36.7053  | 12846 | 26  | 0.086762 | 0.001114 | 0.006125 |
| 11.3  | 100    | 44.1105  | 13995 | 44  | 0.000974 | 0.001758 | 0.009029 |
| 11.7  | 100    | 14.3999  | 3960  | 34  | 0.011262 | 0.002777 | 0.0172   |
| 24.4  | 100    | 64.418   | 23369 | 13  | 2.139941 | 0.004192 | 0.03039  |
| 0.7   | 100    | 100.8617 | 37177 | 13  | 1.453592 | 0.004643 | 0.03327  |
| 80.6  | 25.888 | 40.52    | 14450 | 44  | 0.000931 | 0.006926 | 0.05061  |
| 1.7   | 100    | 63.6304  | 23058 | 14  | 2.003758 | 0.007423 | 0.05356  |
| 6.6   | 100    | 108.5048 | 44579 | 47  | 0.000455 | 0        | 9.64E-05 |
| 25.2  | 100    | 71.0423  | 26200 | 53  | 0.000169 | 0        | 5.63E-06 |
| 8.8   | 100    | 70.8276  | 26105 | 25  | 0.116698 | 0        | 0.000216 |
| 34.1  | 100    | 70.4932  | 25963 | 50  | 0.000422 | 0        | 1.15E-05 |

|       |        |          |       |    |          |          |          |
|-------|--------|----------|-------|----|----------|----------|----------|
| 18.2  | 100    | 36.7984  | 12882 | 32 | 0.021538 | 0.000525 | 0.002422 |
| 39.7  | 100    | 52.5486  | 19680 | 43 | 0.000293 | 0.000525 | 0.002616 |
| 14.6  | 100    | 55.6847  | 19854 | 38 | 0.005782 | 0.001576 | 0.008698 |
| 4.1   | 100    | 118.928  | 46421 | 36 | 0.008671 | 0.002012 | 0.01086  |
| 7.6   | 100    | 56.7511  | 20732 | 35 | 0.005092 | 0.002315 | 0.01414  |
| 22.9  | 100    | 67.7293  | 24807 | 30 | 0.015391 | 0.002315 | 0.01297  |
| 40    | 100    | 35.9454  | 12550 | 20 | 0.29823  | 0.002843 | 0.01829  |
| 21.8  | 100    | 96.0027  | 35077 | 27 | 0.092975 | 0.003967 | 0.0288   |
| 31.7  | 100    | 61.0309  | 20544 | 46 | 0.000427 | 0        | 0.000143 |
| 69.5  | 100    | 46.9405  | 16911 | 36 | 0.009068 | 0        | 0.00066  |
| 14    | 100    | 55.5805  | 20320 | 39 | 0.00493  | 0        | 0.000181 |
| 0     | 100    | 90.9377  | 34192 | 30 | 0.047314 | 0        | 0.000644 |
| 5.6   | 100    | 63.737   | 25668 | 34 | 0.013938 | 0.000951 | 0.004212 |
| 30.3  | 100    | 31.5029  | 9581  | 27 | 0.004046 | 0.001308 | 0.006975 |
| 6     | 100    | 47.0101  | 16941 | 40 | 0.00329  | 0.001576 | 0.008158 |
| 1.9   | 100    | 90.4305  | 33777 | 24 | 0.149281 | 0.002177 | 0.01238  |
| 11.1  | 100    | 66.762   | 24328 | 14 | 1.845064 | 0.002257 | 0.01261  |
| 0.9   | 100    | 61.7035  | 22622 | 47 | 0.000381 | 0        | 7.06E-07 |
| 5.6   | 100    | 77.3619  | 28683 | 35 | 0.008202 | 0        | 8.31E-05 |
| 22.5  | 100    | 42.5407  | 13407 | 34 | 0.006744 | 0.000525 | 0.002429 |
| 7.6   | 100    | 95.7873  | 34980 | 21 | 0.360072 | 0.000951 | 0.004556 |
| 35.7  | 100    | 16.532   | 4895  | 23 | 0.090662 | 0.000951 | 0.003998 |
| 75.6  | 100    | 46.8101  | 15004 | 24 | 0.060096 | 0.001308 | 0.007031 |
| 49.1  | 100    | 32.2757  | 10942 | 21 | 0.116284 | 0.002257 | 0.01269  |
| 58.2  | 100    | 69.1655  | 23851 | 33 | 0.002811 | 0.002257 | 0.01265  |
| 95.3  | 82.303 | 51.7021  | 18696 | 36 | 0.006373 | 0.00337  | 0.024    |
| 94.5  | 100    | 61.7901  | 20837 | 31 | 0.031853 | 0        | 0.00099  |
| 20.8  | 100    | 62.155   | 20987 | 55 | 0.000132 | 0        | 4.39E-05 |
| 10.5  | 100    | 68.3011  | 23490 | 38 | 0.003948 | 0        | 2.28E-06 |
| 25.9  | 64.543 | 68.2676  | 23477 | 30 | 0.031417 | 0        | 1.09E-05 |
| 35.6  | 100    | 67.7641  | 23281 | 8  | 4.04808  | 0        | 0.000348 |
| 2.1   | 100    | 42.3346  | 13353 | 59 | 4E-05    | 0        | 0.000805 |
| 44.5  | 100    | 73.6842  | 25272 | 12 | 3.298147 | 0        | 0.000284 |
| 27.1  | 20.973 | 73.5238  | 25198 | 66 | 1.39E-05 | 0        | 3.17E-08 |
| 78.5  | 29.051 | 141.1555 | 54525 | 68 | 3.79E-06 | 0        | 9.4E-06  |
| 10.7  | 100    | 60.3675  | 24201 | 38 | 0.005717 | 0        | 0.001144 |
| 116.4 | 100    | 35.3919  | 12337 | 54 | 0.000117 | 0        | 0.000421 |
| 117.4 | 66.029 | 41.4192  | 14301 | 50 | 6.97E-05 | 0.000141 | 0.00167  |
| 6.2   | 100    | 17.2477  | 4963  | 61 | 1.34E-05 | 0.000273 | 0.001992 |
| 83.8  | 100    | 42.6872  | 15089 | 30 | 0.030711 | 0.000525 | 0.002637 |
| 107.5 | 40.56  | 35.1858  | 12247 | 59 | 3.3E-05  | 0.000758 | 0.00315  |
| 11    | 20.778 | 141.1576 | 54527 | 36 | 0.005901 | 0.000951 | 0.003801 |
| 11.2  | 100    | 45.2236  | 15705 | 57 | 4.68E-05 | 0.001022 | 0.00556  |
| 21.4  | 100    | 60.8762  | 24429 | 27 | 0.068138 | 0.001022 | 0.004643 |
| 19.9  | 100    | 40.9143  | 14112 | 49 | 8.56E-05 | 0.001308 | 0.006988 |
| 3.5   | 100    | 74.0386  | 25424 | 30 | 0.049752 | 0.001576 | 0.008857 |
| 27.7  | 100    | 73.1069  | 25023 | 12 | 3.440076 | 0.001576 | 0.008455 |
| 81.4  | 100    | 58.3334  | 19349 | 35 | 0.010747 | 0.001854 | 0.009804 |
| 14.5  | 100    | 37.9719  | 13320 | 47 | 0.000391 | 0.002012 | 0.01095  |
| 4     | 100    | 67.7951  | 23294 | 26 | 0.065645 | 0.002376 | 0.01545  |
| 6.2   | 100    | 73.0068  | 24986 | 19 | 0.62097  | 0.002843 | 0.01851  |
| 34.2  | 100    | 42.6323  | 15065 | 27 | 0.070428 | 0.00337  | 0.02319  |

|       |        |          |       |    |          |          |          |
|-------|--------|----------|-------|----|----------|----------|----------|
| 43.5  | 100    | 56.4419  | 18728 | 28 | 0.051559 | 0.00337  | 0.02421  |
| 26.1  | 100    | 41.1537  | 14203 | 32 | 0.003547 | 0.004049 | 0.02921  |
| 14.9  | 100    | 41.9238  | 14474 | 37 | 0.001121 | 0.005618 | 0.03866  |
| 50.3  | 100    | 57.9553  | 19349 | 25 | 0.118001 | 0.00599  | 0.04541  |
| 18.4  | 100    | 43.1379  | 15272 | 29 | 0.033816 | 0.006872 | 0.04992  |
| 231.5 | 51.448 | 56.9458  | 18937 | 29 | 0.045174 | 0.007057 | 0.05236  |
| 229.8 | 72.166 | 57.4492  | 19140 | 33 | 0.017575 | 0.009514 | 0.07399  |
| 21.7  | 100    | 87.1428  | 30586 | 32 | 0.025446 | 0        | 0.001182 |
| 21.5  | 100    | 139.9686 | 54950 | 77 | 5.42E-07 | 0        | 4.51E-08 |
| 3.7   | 100    | 139.9485 | 54940 | 52 | 0.0002   | 0        | 7.05E-06 |
| 15.7  | 100    | 98.3261  | 37248 | 64 | 1.32E-05 | 0        | 5.22E-09 |
| 9.6   | 100    | 105.6524 | 40426 | 37 | 0.007907 | 0        | 0.001204 |
| 7.2   | 100    | 105.4053 | 40317 | 43 | 0.002079 | 0        | 0.000115 |
| 57    | 100    | 68.0964  | 24956 | 30 | 0.042832 | 0        | 2.39E-05 |
| 57.9  | 66.954 | 67.9079  | 24878 | 36 | 0.010316 | 0        | 1.41E-06 |
| 55.2  | 75.569 | 67.5938  | 24752 | 19 | 0.501129 | 0        | 0.001146 |
| 101.3 | 100    | 140.8478 | 54340 | 27 | 0.046421 | 0        | 2.68E-05 |
| 10.6  | 100    | 62.5251  | 22610 | 28 | 0.049368 | 0.00141  | 0.007232 |
| 67.3  | 100    | 62.4954  | 22596 | 27 | 0.06022  | 0.001677 | 0.008911 |
| 9.7   | 100    | 71.9617  | 24574 | 33 | 0.019629 | 0.001758 | 0.009233 |
| 7.2   | 100    | 85.354   | 32258 | 31 | 0.017148 | 0.002079 | 0.0116   |
| 180.5 | 100    | 17.8962  | 6070  | 43 | 0.001441 | 0.002843 | 0.01928  |
| 10.9  | 100    | 97.9794  | 37090 | 11 | 1.425125 | 0.003254 | 0.02123  |
| 1.8   | 100    | 97.8185  | 37020 | 15 | 0.903909 | 0.007785 | 0.05549  |
| 38.9  | 100    | 84.6544  | 31469 | 22 | 0.238936 | 0        | 0.000186 |
| 50.1  | 100    | 84.1516  | 31282 | 32 | 0.029648 | 0        | 1.83E-05 |
| 30.5  | 100    | 83.6468  | 31083 | 31 | 0.032272 | 0        | 0.000329 |
| 11.2  | 100    | 65.3551  | 24036 | 42 | 0.001924 | 0        | 2.94E-06 |
| 6.5   | 100    | 64.8765  | 23850 | 51 | 0.00023  | 0        | 2.89E-05 |
| 16.9  | 100    | 64.8524  | 23840 | 35 | 0.009102 | 0        | 3.69E-05 |
| 22.7  | 100    | 51.9827  | 18894 | 50 | 0.000161 | 0        | 0.000351 |
| 123.3 | 28.888 | 51.7169  | 18795 | 34 | 0.005846 | 0        | 0.001306 |
| 14.6  | 100    | 51.7172  | 18277 | 63 | 1.33E-05 | 0        | 0.000132 |
| 23.7  | 100    | 51.2134  | 18074 | 57 | 5.22E-05 | 0        | 0.000435 |
| 57.8  | 100    | 45.7989  | 15880 | 28 | 0.055272 | 0        | 0.000356 |
| 8.2   | 100    | 22.9548  | 8373  | 38 | 0.006019 | 0        | 0.000128 |
| 129.4 | 82.725 | 22.8299  | 8317  | 33 | 0.018088 | 0        | 7.34E-06 |
| 11.2  | 100    | 84.2012  | 31303 | 11 | 3.312943 | 0.000951 | 0.003894 |
| 6.8   | 100    | 67.5322  | 27283 | 24 | 0.154993 | 0.000951 | 0.003687 |
| 6.3   | 100    | 84.705   | 31491 | 17 | 0.784971 | 0.001022 | 0.005508 |
| 23.8  | 100    | 52.2195  | 18987 | 39 | 0.003286 | 0.001576 | 0.008345 |
| 10.8  | 100    | 64.3485  | 23649 | 12 | 2.207131 | 0.002079 | 0.01167  |
| 9.6   | 100    | 50.9855  | 20182 | 28 | 0.052919 | 0.002079 | 0.01186  |
| 9.9   | 100    | 27.9683  | 9265  | 43 | 0.001677 | 0.002177 | 0.0124   |
| 3.1   | 100    | 65.3793  | 24046 | 25 | 0.09863  | 0.002257 | 0.01269  |
| 30.3  | 100    | 45.295   | 15678 | 19 | 0.455919 | 0.00496  | 0.03471  |
| 23.6  | 100    | 45.3614  | 15705 | 14 | 1.348465 | 0.00496  | 0.03459  |
| 44    | 100    | 51.3619  | 18139 | 32 | 0.020012 | 0.006654 | 0.04867  |
| 7.3   | 100    | 83.6973  | 31103 | 11 | 3.030896 | 0.00861  | 0.06505  |
| 8.9   | 100    | 101.0621 | 36117 | 34 | 0.015577 | 0        | 0.000577 |
| 10.8  | 100    | 76.3122  | 26317 | 47 | 0.000519 | 0        | 0.000474 |
| 23.6  | 100    | 76.2205  | 26281 | 73 | 1.39E-06 | 0        | 1.31E-06 |

|       |        |          |       |     |          |          |          |
|-------|--------|----------|-------|-----|----------|----------|----------|
| 14.1  | 100    | 75.8077  | 26119 | 61  | 2.16E-05 | 0        | 6.13E-05 |
| 21.6  | 100    | 81.3337  | 30533 | 35  | 0.014187 | 0        | 0.000486 |
| 89.5  | 35.648 | 50.5442  | 19989 | 87  | 8.61E-08 | 0        | 1.38E-07 |
| 19.6  | 47.22  | 50.5883  | 20009 | 79  | 5.53E-07 | 0        | 2.39E-06 |
| 38.2  | 49.436 | 51.0483  | 20209 | 72  | 2.93E-06 | 0        | 6.46E-06 |
| 12.3  | 100    | 52.2786  | 20746 | 75  | 1.33E-06 | 0        | 9.73E-06 |
| 10.4  | 100    | 66.4131  | 26796 | 56  | 5.49E-05 | 0        | 0.000886 |
| 49    | 100    | 140.6041 | 54193 | 43  | 0.000859 | 0.000951 | 0.004445 |
| 13.5  | 100    | 41.7666  | 13128 | 31  | 0.025942 | 0.000951 | 0.003682 |
| 63.4  | 100    | 50.0416  | 19770 | 24  | 0.176582 | 0.001022 | 0.004827 |
| 14.7  | 100    | 97.1496  | 37315 | 42  | 0.002346 | 0.001114 | 0.005883 |
| 78.8  | 15.485 | 140.7066 | 54252 | 28  | 0.016917 | 0.001576 | 0.008809 |
| 6.3   | 100    | 39.9608  | 12493 | 33  | 0.02288  | 0.001758 | 0.009012 |
| 4.1   | 100    | 37.2712  | 11551 | 49  | 0.000444 | 0.001758 | 0.008996 |
| 7.3   | 100    | 41.7332  | 14908 | 24  | 0.180432 | 0.002376 | 0.01509  |
| 7.7   | 100    | 38.5828  | 14872 | 21  | 0.280609 | 0.00337  | 0.02191  |
| 30.3  | 100    | 39.76    | 12421 | 23  | 0.230472 | 0.00599  | 0.04521  |
| 6.4   | 100    | 96.6463  | 37103 | 33  | 0.018092 | 0.007636 | 0.05457  |
| 24.3  | 100    | 39.9002  | 15412 | 23  | 0.20323  | 0.007636 | 0.05498  |
| 70.4  | 100    | 18.4134  | 5649  | 26  | 0.073408 | 0        | 0.000404 |
| 56.7  | 100    | 18.7542  | 6122  | 20  | 0.348688 | 0        | 0.000943 |
| 2.4   | 100    | 121.5418 | 44578 | 65  | 1.09E-05 | 0        | 2.37E-06 |
| 1.1   | 100    | 18.1813  | 6212  | 50  | 0.000121 | 0        | 1.52E-05 |
| 20.7  | 100    | 18.167   | 6205  | 52  | 7.66E-05 | 0        | 1.09E-06 |
| 302.6 | 100    | 17.4171  | 5814  | 39  | 0.005259 | 0        | 6.71E-06 |
| 18    | 45.05  | 68.6179  | 25181 | 54  | 0.000103 | 0        | 6.57E-06 |
| 50    | 100    | 61.9248  | 24895 | 31  | 0.032678 | 0        | 0.000333 |
| 200.9 | 100    | 19.4263  | 6402  | 12  | 2.687089 | 0.000868 | 0.003399 |
| 19.1  | 100    | 19.461   | 6419  | 22  | 0.25981  | 0.000951 | 0.004577 |
| 36.8  | 100    | 72.1971  | 24664 | 47  | 0.000563 | 0.001022 | 0.005558 |
| 200.9 | 100    | 19.4294  | 6404  | 12  | 2.813728 | 0.001498 | 0.00756  |
| 14.9  | 100    | 35.2371  | 12270 | 35  | 0.010893 | 0.002719 | 0.01664  |
| 85.7  | 17.67  | 13.1325  | 3671  | 37  | 0.005823 | 0.002777 | 0.01742  |
| 46.4  | 100    | 20.3184  | 6767  | 12  | 2.992649 | 0.00337  | 0.02204  |
| 15.2  | 100    | 71.7439  | 24488 | 19  | 0.319089 | 0.00861  | 0.06528  |
| 189.2 | 4.607  | 13.1189  | 3657  | 18  | 0.44476  | 0.009655 | 0.07665  |
| 4.7   | 100    | 106.0222 | 43553 | 65  | 9.78E-07 | 0        | 1.93E-10 |
| 0.8   | 100    | 105.6599 | 43387 | 30  | 0.00296  | 0        | 0.000129 |
| 4.3   | 70.358 | 105.5142 | 43324 | 72  | 2.19E-07 | 0        | 1.69E-10 |
| 49    | 100    | 23.9098  | 8187  | 30  | 0.025393 | 0        | 0.000445 |
| 41.1  | 5.872  | 140.5953 | 55268 | 108 | 3.58E-10 | 0        | 8.09E-12 |
| 55.7  | 12.815 | 140.2691 | 55092 | 101 | 2.94E-09 | 0        | 3.46E-14 |
| 46.7  | 50.443 | 140.2732 | 55095 | 82  | 2.46E-07 | 0        | 5E-10    |
| 39.9  | 100    | 140.2754 | 55096 | 100 | 4.22E-09 | 0        | 6.57E-14 |
| 36.9  | 36.979 | 140.6642 | 52363 | 101 | 1.59E-09 | 0        | 9.01E-12 |
| 21.7  | 100    | 140.3662 | 52200 | 71  | 3.03E-06 | 0        | 3.16E-08 |
| 18.4  | 100    | 113.6391 | 42484 | 52  | 0.000246 | 0        | 0.000233 |
| 51.2  | 100    | 114.142  | 42706 | 59  | 4.86E-05 | 0        | 6.12E-06 |
| 23.6  | 100    | 64.9732  | 24036 | 33  | 0.022407 | 0        | 0.000423 |
| 17.1  | 100    | 65.4761  | 24252 | 36  | 0.012175 | 0        | 0.000959 |
| 56.5  | 61.579 | 140.6573 | 54225 | 95  | 7.85E-09 | 0        | 4.13E-10 |
| 366.4 | 25.735 | 140.654  | 54222 | 93  | 1.36E-08 | 0        | 1.56E-11 |

|       |        |          |       |     |          |          |          |
|-------|--------|----------|-------|-----|----------|----------|----------|
| 17.8  | 100    | 142.7729 | 49689 | 78  | 6.8E-07  | 0        | 5.83E-10 |
| 11    | 100    | 17.57    | 5080  | 37  | 0.00262  | 0.000141 | 0.001571 |
| 6.5   | 100    | 72.224   | 24673 | 56  | 5.92E-05 | 0.00065  | 0.002714 |
| 19.6  | 100    | 79.4157  | 28204 | 33  | 0.017499 | 0.000951 | 0.003914 |
| 5.3   | 100    | 67.4532  | 25058 | 45  | 0.001034 | 0.000951 | 0.00415  |
| 7.2   | 100    | 18.1539  | 5291  | 37  | 0.004816 | 0.001022 | 0.005691 |
| 28.3  | 100    | 79.9277  | 28437 | 33  | 0.018463 | 0.00121  | 0.006523 |
| 15.5  | 100    | 79.8943  | 28422 | 35  | 0.011521 | 0.001308 | 0.007184 |
| 24.9  | 76.038 | 62.9786  | 23220 | 56  | 3.07E-05 | 0.001308 | 0.007038 |
| 79.3  | 28.657 | 67.8749  | 25232 | 36  | 0.006842 | 0.001498 | 0.00782  |
| 13.3  | 100    | 62.9831  | 22929 | 47  | 0.000289 | 0.001758 | 0.00908  |
| 12.7  | 100    | 64.4637  | 23827 | 22  | 0.290344 | 0.002079 | 0.0119   |
| 47.1  | 100    | 78.1821  | 27668 | 26  | 0.094394 | 0.002543 | 0.01567  |
| 9     | 31.881 | 114.1116 | 42693 | 33  | 0.019296 | 0.002777 | 0.01703  |
| 106.2 | 30.711 | 67.3722  | 25026 | 26  | 0.084754 | 0.002777 | 0.01772  |
| 6.5   | 100    | 64.9635  | 24032 | 32  | 0.024944 | 0.00337  | 0.02189  |
| 6.7   | 100    | 18.7607  | 5495  | 35  | 0.012306 | 0.00337  | 0.02355  |
| 23    | 100    | 83.2077  | 29021 | 25  | 0.104205 | 0.003736 | 0.02766  |
| 23.6  | 100    | 58.9604  | 19727 | 23  | 0.158346 | 0.003736 | 0.02661  |
| 0     | 100    | 129.392  | 50412 | 13  | 0.797555 | 0.003967 | 0.0289   |
| 11.4  | 100    | 72.4048  | 24743 | 36  | 0.005712 | 0.00496  | 0.03474  |
| 13    | 100    | 83.1247  | 28988 | 37  | 0.00685  | 0.005687 | 0.03939  |
| 20.3  | 100    | 61.2267  | 20416 | 24  | 0.111073 | 0.00599  | 0.0444   |
| 0     | 100    | 18.1917  | 5305  | 42  | 0.001629 | 0.00822  | 0.06028  |
| 2.4   | 100    | 94.8375  | 35481 | 56  | 7.61E-05 | 0        | 0.000717 |
| 17.2  | 100    | 106.8462 | 43906 | 78  | 6.49E-07 | 0        | 1.12E-07 |
| 7.8   | 30.539 | 106.8165 | 43894 | 49  | 0.000467 | 0        | 0.000447 |
| 18.5  | 65.284 | 86.7889  | 32429 | 54  | 0.000124 | 0        | 0.000576 |
| 19.7  | 17.629 | 86.7726  | 32422 | 46  | 0.000778 | 0        | 0.000358 |
| 2.6   | 100    | 85.3238  | 31813 | 40  | 0.000921 | 0        | 0.000777 |
| 15.4  | 50.226 | 92.2426  | 34716 | 57  | 2.31E-05 | 0        | 1.31E-06 |
| 28.7  | 42.377 | 91.8422  | 34548 | 62  | 7.61E-06 | 0        | 1.51E-06 |
| 7.1   | 55.337 | 140.6801 | 54238 | 89  | 2.35E-08 | 0        | 4.58E-10 |
| 421.4 | 27.074 | 140.677  | 54236 | 80  | 2.2E-07  | 0        | 1.78E-08 |
| 1.7   | 100    | 139.692  | 54258 | 56  | 8.01E-05 | 0        | 0.0002   |
| 26.4  | 81.452 | 121.876  | 46079 | 45  | 0.000299 | 0        | 0.001268 |
| 14.5  | 100    | 121.9335 | 46106 | 60  | 8.86E-06 | 0        | 0.000218 |
| 15.8  | 100    | 86.6883  | 31240 | 43  | 0.001727 | 0        | 0.00047  |
| 71.2  | 77.079 | 86.6981  | 31244 | 69  | 4.01E-06 | 0        | 3.65E-05 |
| 22.1  | 100    | 87.2556  | 31482 | 56  | 8.05E-05 | 0        | 0.000448 |
| 41.8  | 100    | 86.1963  | 31023 | 62  | 2.21E-05 | 0        | 2.6E-05  |
| 2.2   | 5.522  | 141.0491 | 54461 | 93  | 8.29E-09 | 0        | 2.45E-10 |
| 124.4 | 2.839  | 141.0478 | 54459 | 108 | 2.29E-10 | 0        | 8.46E-11 |
| 13.6  | 100    | 141.4356 | 54693 | 51  | 8.47E-05 | 0        | 1.22E-10 |
| 62.8  | 31.568 | 141.3909 | 54668 | 61  | 3.35E-05 | 0        | 1.14E-07 |
| 8.4   | 100    | 107.3694 | 44127 | 39  | 0.005216 | 0.00065  | 0.002693 |
| 29.5  | 100    | 59.3501  | 19869 | 25  | 0.112169 | 0.000758 | 0.002956 |
| 6     | 100    | 105.4742 | 39097 | 49  | 0.000173 | 0.000951 | 0.004322 |
| 8.3   | 100    | 91.7434  | 34506 | 25  | 0.034481 | 0.000951 | 0.004193 |
| 2.9   | 100    | 92.3452  | 34754 | 42  | 0.000625 | 0.001022 | 0.005213 |
| 13.9  | 100    | 64.388   | 21876 | 55  | 8.46E-05 | 0.001022 | 0.005419 |
| 3     | 100    | 95.3433  | 35691 | 41  | 0.002918 | 0.001022 | 0.004965 |

|       |        |          |       |    |          |          |          |
|-------|--------|----------|-------|----|----------|----------|----------|
| 7.3   | 100    | 86.1794  | 31017 | 34 | 0.012151 | 0.001576 | 0.008243 |
| 7.1   | 100    | 87.4066  | 32564 | 35 | 0.009474 | 0.001945 | 0.009928 |
| 22.7  | 100    | 51.0699  | 18988 | 52 | 0.000126 | 0.002376 | 0.01526  |
| 69.6  | 100    | 121.4262 | 45875 | 25 | 0.027223 | 0.002777 | 0.01766  |
| 32.4  | 100    | 29.7832  | 9955  | 34 | 0.015701 | 0.004266 | 0.03077  |
| 2.5   | 100    | 86.2677  | 32204 | 20 | 0.279043 | 0.004643 | 0.0332   |
| 34.3  | 100    | 31.2427  | 10692 | 43 | 0.001845 | 0.004803 | 0.03398  |
| 9.7   | 100    | 64.8937  | 22088 | 42 | 0.002046 | 0.007057 | 0.05262  |
| 24    | 100    | 15.9056  | 4553  | 39 | 0.004657 | 0.00728  | 0.05288  |
| 185.2 | 37.977 | 56.412   | 21096 | 41 | 0.002952 | 0.00971  | 0.07747  |
| 223.8 | 4.005  | 24.6205  | 8011  | 49 | 0.000103 | 0        | 0.000183 |
| 15.6  | 100    | 76.7155  | 27023 | 33 | 0.023539 | 0        | 4.07E-05 |
| 34.5  | 45.418 | 77.6445  | 27427 | 70 | 4.84E-06 | 0        | 5E-09    |
| 57.8  | 36.059 | 77.7302  | 27466 | 46 | 0.001098 | 0        | 1.09E-08 |
| 5     | 100    | 77.3731  | 27308 | 53 | 0.000233 | 0        | 2.3E-05  |
| 32.4  | 100    | 77.1406  | 27202 | 69 | 5.67E-06 | 0        | 1.32E-09 |
| 96.8  | 95.75  | 77.2201  | 27238 | 40 | 0.003981 | 0        | 5.22E-08 |
| 17.6  | 100    | 23.1     | 7871  | 56 | 1.68E-05 | 0        | 0.00056  |
| 3.6   | 100    | 132.1848 | 48737 | 92 | 9.54E-09 | 0        | 1.39E-10 |
| 5     | 100    | 132.6902 | 48933 | 91 | 1.14E-08 | 0        | 4.71E-11 |
| 15.9  | 100    | 96.4669  | 34328 | 46 | 0.000786 | 0        | 7.36E-05 |
| 25.4  | 20.972 | 96.3897  | 34297 | 72 | 2.4E-06  | 0        | 2.34E-06 |
| 28    | 59.755 | 120.5193 | 44142 | 68 | 6.59E-06 | 0        | 7.9E-08  |
| 37.9  | 100    | 25.1774  | 7551  | 40 | 0.000748 | 0        | 0.001476 |
| 13.7  | 100    | 25.3203  | 7594  | 53 | 3.78E-05 | 0        | 0.001278 |
| 3.7   | 100    | 138.8665 | 51507 | 51 | 0.000103 | 0        | 2.62E-06 |
| 17.9  | 100    | 112.4719 | 43745 | 31 | 0.030067 | 0        | 0.001304 |
| 48.9  | 100    | 140.18   | 53984 | 28 | 0.062586 | 0        | 0.000461 |
| 5.9   | 100    | 128.7642 | 49017 | 42 | 0.002685 | 0        | 0.000668 |
| 37.4  | 100    | 83.1451  | 29763 | 50 | 0.000399 | 0        | 0.00014  |
| 6.6   | 100    | 78.152   | 27655 | 36 | 0.012541 | 0        | 0.000613 |
| 17.5  | 100    | 78.2332  | 27693 | 14 | 1.566556 | 0        | 0.000718 |
| 4.1   | 100    | 111.961  | 43511 | 37 | 0.008261 | 0.000273 | 0.001835 |
| 1.9   | 100    | 95.9178  | 34094 | 55 | 6.83E-05 | 0.000273 | 0.001972 |
| 5.8   | 100    | 121.0256 | 44350 | 37 | 0.007867 | 0.000525 | 0.002216 |
| 17.8  | 100    | 24.4032  | 7929  | 45 | 0.000223 | 0.000758 | 0.002791 |
| 3.9   | 100    | 129.2736 | 49245 | 28 | 0.068134 | 0.000951 | 0.00447  |
| 122.7 | 100    | 26.642   | 9949  | 38 | 0.005837 | 0.000951 | 0.004237 |
| 0     | 100    | 127.304  | 48390 | 31 | 0.032016 | 0.000951 | 0.004586 |
| 31.9  | 100    | 25.6475  | 7624  | 29 | 0.010244 | 0.00121  | 0.006841 |
| 17.8  | 100    | 22.4346  | 7180  | 46 | 0.000173 | 0.00121  | 0.006608 |
| 107.6 | 100    | 23.4111  | 8567  | 41 | 0.001766 | 0.00141  | 0.007283 |
| 4.4   | 100    | 120.0161 | 43930 | 30 | 0.042748 | 0.001498 | 0.007872 |
| 25.5  | 100    | 73.409   | 25599 | 23 | 0.215019 | 0.001945 | 0.01     |
| 12    | 100    | 83.7501  | 30000 | 36 | 0.011902 | 0.002012 | 0.01123  |
| 1     | 100    | 127.8113 | 48590 | 16 | 1.173183 | 0.006991 | 0.05152  |
| 8     | 100    | 95.9637  | 34112 | 20 | 0.376691 | 0.007785 | 0.05567  |
| 1.2   | 100    | 120.5466 | 44153 | 23 | 0.195137 | 0.008746 | 0.06655  |
| 2.8   | 100    | 111.8241 | 41712 | 9  | 4.857019 | 0.009858 | 0.08176  |
| 53.6  | 76.286 | 69.6783  | 25750 | 65 | 1.22E-05 | 0        | 1.93E-06 |
| 72.8  | 45.772 | 69.665   | 25744 | 32 | 0.02281  | 0        | 0.000454 |
| 47.3  | 100    | 77.4056  | 27322 | 52 | 9.06E-05 | 0        | 0.000235 |



|       |        |          |       |    |          |          |          |
|-------|--------|----------|-------|----|----------|----------|----------|
| 15    | 100    | 82.4842  | 33600 | 64 | 1.69E-05 | 0        | 5.55E-07 |
| 4.8   | 100    | 81.9695  | 33389 | 38 | 0.006683 | 0        | 0.000127 |
| 62.9  | 31.856 | 122.8432 | 45109 | 63 | 1.64E-05 | 0        | 5.84E-06 |
| 16.3  | 66.657 | 122.8814 | 45125 | 78 | 5.75E-07 | 0        | 7.71E-08 |
| 13    | 100    | 122.1348 | 47392 | 63 | 1.97E-05 | 0        | 8.32E-07 |
| 9.2   | 100    | 110.2791 | 41059 | 40 | 0.002878 | 0        | 0.000195 |
| 7.1   | 100    | 110.415  | 41115 | 54 | 0.000122 | 0        | 8.35E-05 |
| 15.7  | 36.553 | 110.7829 | 41272 | 43 | 0.00151  | 0        | 9.78E-05 |
| 92.6  | 77.993 | 140.2341 | 54010 | 67 | 6.08E-06 | 0        | 2.94E-12 |
| 133.5 | 90.932 | 140.2323 | 54009 | 91 | 2.44E-08 | 0        | 1.28E-13 |
| 27.1  | 100    | 68.5198  | 27728 | 27 | 0.074874 | 0        | 0.001018 |
| 44.7  | 100    | 68.5036  | 27720 | 67 | 8.12E-06 | 0        | 1.96E-06 |
| 4     | 59.668 | 141.082  | 55534 | 27 | 0.064447 | 0.000141 | 0.001634 |
| 8.1   | 100    | 122.1587 | 47402 | 32 | 0.024732 | 0.000868 | 0.003301 |
| 8.2   | 100    | 110.4371 | 41124 | 32 | 0.017839 | 0.000951 | 0.003758 |
| 66.1  | 100    | 48.415   | 19061 | 42 | 0.000957 | 0.001114 | 0.006252 |
| 16.8  | 100    | 5.932    | 1686  | 24 | 0.07762  | 0.001576 | 0.008162 |
| 13.5  | 100    | 18.6438  | 6447  | 37 | 0.009438 | 0.002315 | 0.01327  |
| 10.8  | 100    | 62.7018  | 21210 | 19 | 0.236561 | 0.002376 | 0.01486  |
| 22.4  | 100    | 69.1633  | 25547 | 16 | 0.904215 | 0.002719 | 0.01668  |
| 6.8   | 100    | 76.9582  | 27123 | 29 | 0.016286 | 0.002843 | 0.01833  |
| 18.3  | 100    | 76.9048  | 27099 | 20 | 0.130298 | 0.00337  | 0.02383  |
| 103.9 | 100    | 46.2788  | 16077 | 30 | 0.038086 | 0.00337  | 0.02237  |
| 3.5   | 100    | 68.0154  | 27507 | 19 | 0.492846 | 0.008171 | 0.06001  |
| 1.6   | 100    | 131.2987 | 53854 | 51 | 2.89E-05 | 0        | 0.000533 |
| 45.6  | 100    | 70.4416  | 23998 | 79 | 2.44E-07 | 0        | 1.94E-06 |
| 13.8  | 100    | 31.0091  | 9462  | 56 | 0.000103 | 0        | 2.14E-06 |
| 9.6   | 100    | 30.5017  | 9287  | 31 | 0.036652 | 0        | 0.000769 |
| 27.4  | 100    | 81.956   | 28507 | 65 | 1.57E-05 | 0        | 5.88E-08 |
| 25.9  | 100    | 81.452   | 28324 | 50 | 0.000473 | 0        | 4.38E-06 |
| 11.1  | 100    | 82.4634  | 28707 | 52 | 0.000318 | 0        | 7.9E-05  |
| 18.7  | 100    | 84.9385  | 32079 | 55 | 0.000128 | 0        | 1.3E-07  |
| 239   | 51.42  | 16.8353  | 5498  | 54 | 0.000114 | 0        | 0.001409 |
| 48.8  | 100    | 31.0069  | 9461  | 17 | 0.97598  | 0.000141 | 0.001795 |
| 25.7  | 100    | 77.2703  | 28577 | 46 | 0.001024 | 0.000273 | 0.00192  |
| 10.4  | 100    | 88.8559  | 33792 | 38 | 0.00421  | 0.000273 | 0.002017 |
| 14.2  | 100    | 92.5773  | 33638 | 36 | 0.006804 | 0.000758 | 0.002851 |
| 43.2  | 100    | 30.5038  | 9288  | 18 | 0.762936 | 0.000951 | 0.003623 |
| 12.2  | 100    | 70.4919  | 24019 | 25 | 0.062109 | 0.00121  | 0.006611 |
| 3.5   | 100    | 65.971   | 26605 | 18 | 0.537714 | 0.002719 | 0.01672  |
| 5.5   | 100    | 84.4958  | 30316 | 32 | 0.01819  | 0.004192 | 0.03022  |
| 13.1  | 100    | 77.4704  | 28663 | 25 | 0.12986  | 0.007213 | 0.05274  |
| 26.8  | 100    | 16.8417  | 5214  | 36 | 0.012105 | 0        | 2.64E-06 |
| 88.9  | 100    | 16.8287  | 5208  | 37 | 0.008495 | 0        | 1.44E-06 |
| 52.2  | 100    | 49.9775  | 17547 | 45 | 0.001125 | 0        | 0.000372 |
| 33.6  | 100    | 48.0393  | 16782 | 48 | 0.000498 | 0        | 0.000288 |
| 113.8 | 100    | 38.0669  | 13354 | 28 | 0.063966 | 0        | 0.000178 |
| 32.7  | 100    | 85.651   | 30794 | 49 | 0.000571 | 0        | 5.02E-07 |
| 39.9  | 100    | 57.2663  | 20733 | 44 | 0.001314 | 0        | 0.001257 |
| 106.3 | 49.509 | 67.0484  | 24499 | 52 | 0.000291 | 0        | 0.000718 |
| 79.6  | 100    | 64.2215  | 21582 | 36 | 0.010678 | 0.000758 | 0.002918 |
| 50.9  | 100    | 37.061   | 12981 | 27 | 0.084908 | 0.000868 | 0.003324 |

|       |        |          |       |    |          |          |          |
|-------|--------|----------|-------|----|----------|----------|----------|
| 139.3 | 69.098 | 66.9478  | 24461 | 26 | 0.112766 | 0.001758 | 0.009325 |
| 28    | 100    | 66.7177  | 24368 | 33 | 0.020606 | 0.002315 | 0.01301  |
| 4.8   | 100    | 121.1095 | 47298 | 38 | 0.004648 | 0.002376 | 0.01483  |
| 26.5  | 100    | 56.676   | 21217 | 35 | 0.004636 | 0.002843 | 0.01843  |
| 22.1  | 100    | 65.6603  | 24329 | 22 | 0.294315 | 0.00337  | 0.02189  |
| 9.4   | 100    | 65.4643  | 24246 | 34 | 0.019778 | 0.003736 | 0.02676  |
| 16.1  | 100    | 73.406   | 27315 | 24 | 0.135193 | 0.004581 | 0.03251  |
| 7.4   | 100    | 121.6124 | 47501 | 36 | 0.009446 | 0.005196 | 0.0356   |
| 14.8  | 100    | 63.9868  | 21488 | 24 | 0.152344 | 0.005792 | 0.04212  |
| 65.9  | 100    | 45.7949  | 15932 | 38 | 0.003173 | 0        | 0.000541 |
| 9     | 100    | 45.7654  | 15920 | 49 | 0.000223 | 0        | 0.000856 |
| 39.5  | 100    | 35.5825  | 12661 | 49 | 0.000585 | 0        | 0.000847 |
| 1.6   | 100    | 111.0808 | 42674 | 42 | 0.001348 | 0        | 5.99E-05 |
| 11.6  | 100    | 114.1841 | 43981 | 70 | 3.8E-06  | 0        | 1.44E-06 |
| 10.5  | 100    | 118.2799 | 44492 | 46 | 0.001086 | 0        | 0.000655 |
| 18.2  | 100    | 118.3262 | 44515 | 53 | 0.000196 | 0        | 0.000352 |
| 25    | 100    | 50.5977  | 18354 | 42 | 0.001909 | 0.000273 | 0.002055 |
| 14.4  | 100    | 31.4657  | 9620  | 26 | 0.014434 | 0.000273 | 0.001823 |
| 228.8 | 19.86  | 19.1422  | 6687  | 28 | 0.045934 | 0.000758 | 0.002854 |
| 46.9  | 100    | 59.8709  | 21564 | 37 | 0.004983 | 0.000951 | 0.003903 |
| 39.7  | 100    | 124.0453 | 47010 | 42 | 0.002946 | 0.002543 | 0.01592  |
| 4.5   | 100    | 109.4456 | 40714 | 34 | 0.013379 | 0.003674 | 0.02653  |
| 7.9   | 100    | 49.512   | 16072 | 28 | 0.066702 | 0        | 0.000331 |
| 10.7  | 100    | 50.0547  | 16281 | 40 | 0.004456 | 0        | 0.000512 |
| 8.5   | 100    | 52.2412  | 17120 | 33 | 0.020522 | 0        | 0.000593 |
| 15.8  | 65.298 | 48.9569  | 15844 | 42 | 0.002528 | 0        | 0.000201 |
| 25.4  | 100    | 56.3767  | 18704 | 39 | 0.004956 | 0        | 2.07E-07 |
| 24.9  | 100    | 56.9317  | 18930 | 27 | 0.086039 | 0        | 9.03E-05 |
| 21.3  | 100    | 57.0824  | 18995 | 48 | 0.000593 | 0        | 1.43E-06 |
| 9.9   | 100    | 53.2994  | 17505 | 36 | 0.010175 | 0        | 0.000301 |
| 14.5  | 100    | 55.1054  | 18204 | 44 | 0.001604 | 0        | 5.18E-05 |
| 10.1  | 100    | 55.6118  | 18403 | 33 | 0.022372 | 0        | 0.000223 |
| 0     | 100    | 74.5862  | 27646 | 60 | 4.43E-05 | 0        | 0.000248 |
| 0     | 23.367 | 74.1169  | 27463 | 80 | 4.62E-07 | 0        | 2.54E-09 |
| 0     | 65.235 | 74.0828  | 27450 | 95 | 1.42E-08 | 0        | 6.84E-07 |
| 8.6   | 100    | 43.4083  | 13726 | 37 | 0.006369 | 0        | 0.000556 |
| 8.2   | 100    | 47.7874  | 15374 | 39 | 0.005291 | 0        | 0.000105 |
| 8.8   | 100    | 47.2399  | 15171 | 45 | 0.001454 | 0        | 2.18E-05 |
| 6.6   | 100    | 44.7897  | 14234 | 47 | 0.000795 | 0        | 8.21E-06 |
| 94.4  | 100    | 45.2952  | 14418 | 58 | 6.45E-05 | 0        | 1.26E-08 |
| 3.5   | 100    | 45.3867  | 14453 | 80 | 4.35E-07 | 0        | 1.16E-09 |
| 1.3   | 100    | 76.9802  | 27133 | 43 | 0.001875 | 0        | 0.00022  |
| 32.6  | 100    | 61.5921  | 20764 | 78 | 7.46E-07 | 0        | 9.98E-10 |
| 21.3  | 59.057 | 61.0871  | 20567 | 64 | 1.71E-05 | 0        | 3.45E-08 |
| 33.8  | 11.075 | 60.5863  | 20374 | 70 | 3.85E-06 | 0        | 1.64E-09 |
| 10.3  | 100    | 60.7349  | 20431 | 87 | 8.19E-08 | 0        | 7.1E-11  |
| 0     | 100    | 59.0637  | 19767 | 77 | 6.2E-07  | 0        | 2.12E-07 |
| 9.7   | 100    | 59.4098  | 19890 | 50 | 0.00042  | 0        | 1.22E-05 |
| 9.1   | 100    | 58.905   | 19706 | 40 | 0.004408 | 0        | 0.000106 |
| 26.2  | 2.582  | 60.0796  | 20157 | 74 | 1.83E-06 | 0        | 1.37E-08 |
| 64.3  | 67.581 | 60.1601  | 20194 | 64 | 1.86E-05 | 0        | 2.26E-09 |
| 17    | 17.239 | 60.2309  | 20226 | 88 | 7.08E-08 | 0        | 4.42E-11 |

|       |        |          |       |    |          |   |          |
|-------|--------|----------|-------|----|----------|---|----------|
| 278   | 100    | 60.0638  | 20149 | 47 | 0.000868 | 0 | 6.25E-08 |
| 0.4   | 100    | 59.5673  | 19950 | 60 | 3.07E-05 | 0 | 2.34E-05 |
| 22.8  | 100    | 56.3824  | 18592 | 36 | 0.010862 | 0 | 0.000163 |
| 2.1   | 100    | 50.5509  | 16381 | 28 | 0.070701 | 0 | 0.000544 |
| 35.5  | 100    | 50.4592  | 16344 | 74 | 1.76E-06 | 0 | 7.84E-10 |
| 9.6   | 100    | 49.9553  | 16148 | 51 | 0.000302 | 0 | 5.51E-05 |
| 0.4   | 100    | 66.1211  | 22307 | 53 | 0.000157 | 0 | 0.00012  |
| 21.8  | 100    | 66.4338  | 22434 | 58 | 4.95E-05 | 0 | 3.73E-07 |
| 9     | 100    | 65.9311  | 22235 | 35 | 0.009401 | 0 | 0.000245 |
| 0.8   | 100    | 66.6238  | 22509 | 45 | 0.001041 | 0 | 0.000444 |
| 20.7  | 100    | 141.2692 | 55638 | 89 | 2.87E-08 | 0 | 5.19E-13 |
| 11.6  | 79.604 | 141.267  | 55637 | 73 | 1.33E-06 | 0 | 7.94E-11 |
| 40.9  | 67.678 | 77.5213  | 28687 | 87 | 7.62E-08 | 0 | 1.28E-10 |
| 11.4  | 17.399 | 77.279   | 28582 | 75 | 1.29E-06 | 0 | 1.27E-06 |
| 27.3  | 2.931  | 77.2678  | 28576 | 97 | 7.64E-09 | 0 | 5.89E-12 |
| 31.6  | 52.218 | 77.0141  | 28460 | 42 | 0.002798 | 0 | 1.16E-05 |
| 318.7 | 100    | 141.1629 | 52635 | 83 | 1.54E-07 | 0 | 5.65E-17 |
| 14.9  | 100    | 141.1721 | 52640 | 25 | 0.091685 | 0 | 3.02E-05 |
| 7.3   | 25.353 | 77.7768  | 28807 | 92 | 2.32E-08 | 0 | 3.46E-13 |
| 0.4   | 100    | 73.3476  | 26985 | 48 | 0.000736 | 0 | 0.000129 |
| 44.9  | 17.061 | 141.1606 | 52634 | 79 | 3.44E-07 | 0 | 2.95E-13 |
| 9.8   | 100    | 140.9451 | 52517 | 36 | 0.010616 | 0 | 0.000418 |
| 33.7  | 100    | 24.3028  | 7268  | 24 | 0.131191 | 0 | 0.001487 |
| 56.1  | 100    | 49.5631  | 17431 | 56 | 7.59E-05 | 0 | 0.001308 |
| 57.4  | 100    | 140.4113 | 52223 | 84 | 1.81E-07 | 0 | 1.14E-07 |
| 92.5  | 7.596  | 140.4341 | 52234 | 76 | 1.01E-06 | 0 | 9.94E-08 |
| 264   | 100    | 140.4379 | 52236 | 89 | 5.51E-08 | 0 | 4.63E-09 |
| 19.8  | 39.444 | 102.7654 | 39750 | 52 | 0.00018  | 0 | 1.68E-06 |
| 23.8  | 81.391 | 102.7591 | 39747 | 73 | 1.43E-06 | 0 | 6.94E-07 |
| 45.3  | 4.548  | 102.7014 | 39723 | 56 | 7.44E-05 | 0 | 4.96E-08 |
| 17.1  | 89.901 | 102.4234 | 39596 | 64 | 8.45E-06 | 0 | 6.15E-06 |
| 21.2  | 15.431 | 102.262  | 39521 | 48 | 0.00055  | 0 | 6.69E-06 |
| 18.3  | 41.328 | 102.2493 | 39515 | 83 | 1.49E-07 | 0 | 8.47E-08 |
| 26.1  | 7.056  | 103.204  | 39944 | 59 | 3.84E-05 | 0 | 2.08E-07 |
| 14.7  | 100    | 103.2627 | 39967 | 72 | 2.03E-06 | 0 | 1.27E-06 |
| 9.2   | 100    | 105.2285 | 40761 | 54 | 0.00012  | 0 | 3.35E-06 |
| 11.7  | 100    | 104.7232 | 40564 | 55 | 9.83E-05 | 0 | 4.26E-06 |
| 7     | 100    | 104.2164 | 40360 | 61 | 2.69E-05 | 0 | 1.67E-06 |
| 37.4  | 44.078 | 103.7104 | 40148 | 76 | 7.29E-07 | 0 | 2.21E-09 |
| 21.3  | 98.47  | 103.2687 | 39970 | 40 | 0.00318  | 0 | 4.88E-06 |
| 48    | 2.068  | 102.1928 | 39492 | 55 | 8.82E-05 | 0 | 9.91E-08 |
| 8.8   | 100    | 101.9112 | 39366 | 61 | 1.48E-05 | 0 | 6.52E-05 |
| 3.3   | 100    | 101.1383 | 39043 | 33 | 0.015361 | 0 | 0.000628 |
| 53.4  | 100    | 140.4327 | 54106 | 67 | 7.29E-06 | 0 | 1.4E-07  |
| 36.1  | 100    | 62.8044  | 22765 | 37 | 0.008002 | 0 | 0.000392 |
| 103.3 | 1.839  | 58.5008  | 20985 | 32 | 0.022807 | 0 | 0.001462 |
| 29.4  | 19.634 | 58.5266  | 20997 | 62 | 2.51E-05 | 0 | 0.000133 |
| 23.2  | 16.596 | 59.031   | 21217 | 77 | 8.13E-07 | 0 | 1.68E-05 |
| 88.2  | 2.186  | 59.0065  | 21205 | 32 | 0.025355 | 0 | 0.000825 |
| 2.9   | 100    | 55.3794  | 19735 | 69 | 4.7E-06  | 0 | 0.000162 |
| 11    | 100    | 64.9538  | 26180 | 49 | 0.000434 | 0 | 5.66E-06 |
| 0     | 83.324 | 123.5543 | 43712 | 70 | 4.63E-08 | 0 | 0.001356 |

|       |        |          |       |    |          |          |          |
|-------|--------|----------|-------|----|----------|----------|----------|
| 91.8  | 100    | 61.9292  | 24897 | 35 | 0.009044 | 0        | 1.52E-06 |
| 4.4   | 100    | 141.0554 | 50470 | 67 | 7.82E-06 | 0        | 2.37E-07 |
| 108.8 | 100    | 19.1062  | 6669  | 38 | 0.006571 | 0        | 0.000807 |
| 12.1  | 100    | 66.3507  | 24809 | 36 | 0.000666 | 0.000141 | 0.00158  |
| 8.8   | 100    | 48.4729  | 15645 | 27 | 0.076248 | 0.000141 | 0.001563 |
| 64.5  | 100    | 18.735   | 5622  | 55 | 0.000117 | 0.000141 | 0.001643 |
| 1.3   | 100    | 74.6181  | 27659 | 43 | 0.001956 | 0.000273 | 0.002042 |
| 66.4  | 100    | 41.8225  | 15295 | 48 | 0.000566 | 0.000525 | 0.002545 |
| 61.8  | 100    | 23.1774  | 8472  | 24 | 0.13661  | 0.000525 | 0.002302 |
| 51.5  | 100    | 57.9913  | 20775 | 21 | 0.285826 | 0.000525 | 0.002421 |
| 2.3   | 100    | 59.5481  | 19943 | 29 | 0.044827 | 0.000525 | 0.002624 |
| 5.3   | 100    | 58.1493  | 21290 | 48 | 0.000602 | 0.00065  | 0.002751 |
| 15.8  | 100    | 62.1101  | 24979 | 16 | 0.783858 | 0.000758 | 0.002925 |
| 111.9 | 100    | 41.7342  | 14410 | 56 | 8E-05    | 0.000758 | 0.002962 |
| 0.4   | 100    | 61.7385  | 20817 | 29 | 0.053978 | 0.000868 | 0.003573 |
| 73    | 100    | 24.7121  | 8500  | 18 | 0.549913 | 0.000868 | 0.003351 |
| 75.6  | 100    | 55.363   | 19728 | 35 | 0.011568 | 0.000951 | 0.004536 |
| 56.6  | 100    | 13.1685  | 3599  | 55 | 0.000102 | 0.000951 | 0.004398 |
| 67.6  | 100    | 52.3267  | 17045 | 56 | 9.12E-05 | 0.000951 | 0.003668 |
| 92    | 11.013 | 41.318   | 15094 | 51 | 0.000264 | 0.000951 | 0.004368 |
| 2.3   | 100    | 43.307   | 13690 | 31 | 0.028849 | 0.000951 | 0.004478 |
| 16.6  | 100    | 54.1872  | 17844 | 22 | 0.283907 | 0.001022 | 0.004873 |
| 44.9  | 100    | 52.5148  | 20851 | 19 | 0.528687 | 0.001022 | 0.005106 |
| 0     | 100    | 50.048   | 16184 | 29 | 0.057405 | 0.001022 | 0.00512  |
| 141.8 | 24.207 | 50.0672  | 17632 | 57 | 7.2E-05  | 0.001022 | 0.005773 |
| 248.5 | 100    | 51.2978  | 16661 | 56 | 7.71E-05 | 0.001114 | 0.006044 |
| 75.3  | 100    | 50.4037  | 17726 | 22 | 0.252973 | 0.001114 | 0.006286 |
| 0.8   | 100    | 120.8279 | 42864 | 49 | 6.12E-06 | 0.001114 | 0.006132 |
| 25.3  | 100    | 13.1254  | 3548  | 55 | 0.000112 | 0.001114 | 0.00588  |
| 10.7  | 100    | 76.7577  | 28348 | 17 | 0.75459  | 0.001114 | 0.006366 |
| 5.3   | 100    | 64.4517  | 25969 | 23 | 0.150036 | 0.001114 | 0.006189 |
| 41.7  | 100    | 41.4272  | 14797 | 60 | 2.42E-05 | 0.001308 | 0.00704  |
| 255.4 | 50.377 | 50.2867  | 16274 | 56 | 7.75E-05 | 0.00141  | 0.007347 |
| 6.3   | 100    | 52.7941  | 17328 | 29 | 0.052043 | 0.001498 | 0.007851 |
| 20.3  | 100    | 13.2182  | 3563  | 36 | 0.008014 | 0.001498 | 0.007492 |
| 27    | 100    | 40.8077  | 14886 | 42 | 0.002041 | 0.001498 | 0.007852 |
| 27.8  | 100    | 45.854   | 15956 | 43 | 0.001542 | 0.001576 | 0.00835  |
| 0.4   | 100    | 44.8807  | 14267 | 25 | 0.14212  | 0.001854 | 0.009824 |
| 52.8  | 100    | 57.0647  | 20407 | 17 | 0.655641 | 0.002012 | 0.01122  |
| 5.6   | 100    | 67.5717  | 22879 | 21 | 0.334886 | 0.002079 | 0.01221  |
| 10.6  | 100    | 58.4012  | 19521 | 26 | 0.110892 | 0.002315 | 0.01373  |
| 167.9 | 6.1    | 49.852   | 17547 | 57 | 7.13E-05 | 0.002315 | 0.01335  |
| 33.9  | 100    | 17.9809  | 5618  | 31 | 0.025492 | 0.002315 | 0.01325  |
| 18.8  | 100    | 30.1485  | 11365 | 37 | 0.007311 | 0.002315 | 0.01345  |
| 85.3  | 100    | 40.9766  | 14137 | 60 | 2.33E-05 | 0.002376 | 0.01523  |
| 1.5   | 100    | 72.8611  | 25373 | 32 | 0.023897 | 0.002543 | 0.01624  |
| 28.2  | 100    | 58.1368  | 21284 | 20 | 0.327723 | 0.002543 | 0.01612  |
| 52.8  | 100    | 41.93    | 14983 | 60 | 2.25E-05 | 0.002719 | 0.01679  |
| 5.6   | 100    | 62.5793  | 20930 | 17 | 0.670461 | 0.002777 | 0.01703  |
| 7.1   | 100    | 66.3054  | 22682 | 21 | 0.343727 | 0.002843 | 0.01883  |
| 20.5  | 100    | 57.6323  | 21084 | 21 | 0.285561 | 0.003096 | 0.02019  |
| 176.4 | 1.071  | 50.5819  | 16394 | 57 | 6.98E-05 | 0.003674 | 0.02542  |

|       |        |          |       |    |          |          |          |
|-------|--------|----------|-------|----|----------|----------|----------|
| 2.9   | 100    | 101.7584 | 39297 | 14 | 1.144513 | 0.003892 | 0.02823  |
| 0.4   | 100    | 61.2359  | 20624 | 18 | 0.629434 | 0.003967 | 0.02886  |
| 0.9   | 100    | 77.792   | 28815 | 20 | 0.388557 | 0.004192 | 0.03007  |
| 2.4   | 100    | 103.7724 | 40176 | 25 | 0.110058 | 0.004504 | 0.03207  |
| 201   | 1.051  | 50.7933  | 16473 | 57 | 7.53E-05 | 0.004803 | 0.03418  |
| 31.3  | 100    | 54.8554  | 19536 | 20 | 0.386212 | 0.004803 | 0.03399  |
| 1.2   | 100    | 102.9454 | 39826 | 24 | 0.084153 | 0.005325 | 0.03695  |
| 157   | 100    | 51.802   | 16849 | 38 | 0.005208 | 0.005556 | 0.0381   |
| 1.8   | 100    | 106.2895 | 41201 | 20 | 0.327622 | 0.00599  | 0.04496  |
| 13.9  | 100    | 57.5373  | 19040 | 19 | 0.478905 | 0.006371 | 0.0465   |
| 52.4  | 100    | 45.8024  | 14616 | 5  | 13.78874 | 0.006428 | 0.04698  |
| 21.2  | 100    | 142.7938 | 49699 | 12 | 2.429005 | 0.006428 | 0.04696  |
| 0     | 100    | 102.4573 | 39612 | 19 | 0.22279  | 0.007836 | 0.05651  |
| 3.4   | 100    | 39.4188  | 13887 | 30 | 0.002432 | 0.007969 | 0.05826  |
| 41.3  | 100    | 40.745   | 12771 | 41 | 0.001616 | 0.0085   | 0.06378  |
| 8.4   | 100    | 83.5074  | 31031 | 65 | 8.07E-06 | 0        | 9.17E-07 |
| 1.5   | 100    | 83.0026  | 30846 | 39 | 0.003554 | 0        | 0.00055  |
| 41.8  | 100    | 61.9521  | 22726 | 50 | 0.000412 | 0        | 1.38E-05 |
| 176.2 | 100    | 29.7766  | 9940  | 27 | 0.036387 | 0        | 0.000385 |
| 87.5  | 58.906 | 29.5153  | 9844  | 64 | 8.24E-06 | 0        | 4.33E-05 |
| 204.6 | 1.479  | 29.1783  | 9715  | 40 | 0.002451 | 0        | 0.00037  |
| 65.2  | 100    | 37.2643  | 12750 | 20 | 0.384054 | 0        | 0.001143 |
| 22.9  | 100    | 68.3849  | 23522 | 51 | 0.000359 | 0        | 0.000343 |
| 104.7 | 100    | 30.1225  | 10551 | 31 | 0.017966 | 0        | 0.000834 |
| 4.5   | 100    | 97.4068  | 34692 | 35 | 0.006245 | 0        | 0.000111 |
| 10.2  | 100    | 89.1531  | 31415 | 52 | 0.000287 | 0        | 1.16E-05 |
| 67.9  | 20.986 | 88.823   | 31279 | 73 | 2.4E-06  | 0        | 1.13E-10 |
| 46.1  | 36.558 | 105.3527 | 37843 | 71 | 2.19E-06 | 0        | 3.77E-06 |
| 54.7  | 21.426 | 105.3515 | 37842 | 59 | 3.2E-05  | 0        | 1.31E-05 |
| 54.1  | 27.133 | 88.6446  | 31199 | 70 | 4.58E-06 | 0        | 6.54E-08 |
| 2.2   | 100    | 84.963   | 29701 | 51 | 0.000343 | 0        | 3.79E-05 |
| 38.2  | 100    | 83.2834  | 29052 | 54 | 0.000177 | 0        | 0.0002   |
| 57.7  | 18.817 | 82.9768  | 28927 | 90 | 4.76E-08 | 0        | 5.18E-07 |
| 85.2  | 1.849  | 82.7756  | 28841 | 48 | 0.000795 | 0        | 0.000783 |
| 63.8  | 13.642 | 82.4732  | 28711 | 90 | 4.6E-08  | 0        | 1.72E-07 |
| 6.8   | 100    | 87.1236  | 32570 | 45 | 0.000774 | 0        | 3.41E-05 |
| 7.9   | 100    | 82.2799  | 30582 | 36 | 0.006006 | 0        | 0.001201 |
| 15.5  | 83.672 | 82.2638  | 30575 | 77 | 5.77E-07 | 0        | 2.41E-07 |
| 11.6  | 100    | 69.0388  | 25226 | 44 | 0.001733 | 0        | 0.001208 |
| 5.2   | 100    | 98.1898  | 37185 | 53 | 0.000164 | 0        | 3.32E-05 |
| 18.8  | 100    | 95.3957  | 36002 | 42 | 0.001985 | 0        | 0.000101 |
| 9.6   | 32.944 | 94.8586  | 35777 | 89 | 4.15E-08 | 0        | 9.36E-08 |
| 10.9  | 90.631 | 94.3554  | 35556 | 36 | 0.007855 | 0        | 0.001165 |
| 0.8   | 100    | 112.23   | 43158 | 47 | 0.000654 | 0        | 0.001119 |
| 12.5  | 100    | 103.7631 | 39632 | 54 | 0.000105 | 0        | 0.000141 |
| 10    | 100    | 104.1645 | 39795 | 51 | 0.000205 | 0        | 0.000382 |
| 172   | 68.845 | 14.8614  | 4489  | 19 | 0.568499 | 0        | 0.000562 |
| 72    | 100    | 39.8986  | 13954 | 45 | 0.001004 | 0        | 0.000236 |
| 88    | 73.106 | 39.397   | 13755 | 45 | 0.00116  | 0        | 0.000784 |
| 210.2 | 71.516 | 16.1587  | 5175  | 25 | 0.093803 | 0        | 0.000734 |
| 106   | 36.347 | 37.0359  | 12437 | 41 | 0.002488 | 0        | 0.000584 |
| 22.5  | 46.021 | 76.936   | 28955 | 51 | 0.000244 | 0        | 0.000609 |

|       |        |          |       |    |          |          |          |
|-------|--------|----------|-------|----|----------|----------|----------|
| 39.2  | 49.782 | 76.9442  | 28959 | 73 | 1.53E-06 | 0        | 3.82E-07 |
| 28.1  | 7.917  | 75.8908  | 28519 | 67 | 6.54E-06 | 0        | 4.01E-06 |
| 32.4  | 37.66  | 75.9076  | 28527 | 72 | 1.88E-06 | 0        | 4.36E-07 |
| 13.7  | 100    | 79.2378  | 29922 | 70 | 3.33E-06 | 0        | 7.58E-06 |
| 37.2  | 17.689 | 75.3979  | 28306 | 80 | 3.3E-07  | 0        | 7.67E-08 |
| 3.8   | 100    | 73.6639  | 27582 | 56 | 4.86E-05 | 0        | 0.000238 |
| 13.5  | 100    | 74.8835  | 28079 | 48 | 0.000589 | 0        | 6.84E-05 |
| 14.3  | 100    | 74.8943  | 28084 | 70 | 3.28E-06 | 0        | 4.85E-07 |
| 25.2  | 6.714  | 75.3862  | 28301 | 60 | 2.88E-05 | 0        | 2.99E-05 |
| 32.8  | 100    | 74.3812  | 27879 | 42 | 0.001841 | 0        | 0.000274 |
| 31.5  | 9.794  | 60.1176  | 24082 | 56 | 0.000103 | 0        | 1.67E-06 |
| 8     | 100    | 65.0286  | 26215 | 46 | 0.000926 | 0        | 0.000326 |
| 24    | 48.09  | 60.4262  | 24228 | 81 | 3.08E-07 | 0        | 7.23E-09 |
| 67.3  | 39.152 | 60.6296  | 24322 | 61 | 2.92E-05 | 0        | 8.86E-07 |
| 15    | 100    | 60.9354  | 24456 | 73 | 1.8E-06  | 0        | 1.54E-07 |
| 7.1   | 100    | 63.3337  | 25494 | 31 | 0.018898 | 0        | 2.9E-05  |
| 7.6   | 100    | 62.8267  | 25285 | 46 | 0.000554 | 0        | 2.54E-07 |
| 13.5  | 100    | 62.6598  | 25213 | 48 | 0.000603 | 0        | 3.09E-05 |
| 13.5  | 100    | 63.4511  | 25546 | 33 | 0.019397 | 0        | 0.001098 |
| 6.1   | 100    | 63.9631  | 25762 | 38 | 0.00639  | 0        | 0.000561 |
| 13    | 100    | 63.8367  | 25713 | 11 | 1.571736 | 0        | 0.000868 |
| 11.9  | 100    | 61.6377  | 24771 | 52 | 0.000224 | 0        | 1.74E-05 |
| 65.2  | 100    | 61.1345  | 24549 | 64 | 1.56E-05 | 0        | 9E-07    |
| 16.9  | 100    | 62.1464  | 24997 | 56 | 0.000104 | 0        | 3.72E-06 |
| 42.8  | 13.883 | 80.7425  | 28783 | 60 | 4.23E-05 | 0        | 0.000264 |
| 18.2  | 13.002 | 28.2075  | 10570 | 39 | 0.006137 | 0        | 0.000256 |
| 40.7  | 59.936 | 28.2619  | 10595 | 34 | 0.017458 | 0        | 5.54E-05 |
| 141.2 | 100    | 26.9988  | 10085 | 41 | 0.001384 | 0        | 0.000271 |
| 9     | 100    | 80.6862  | 28027 | 43 | 0.000528 | 0.000141 | 0.001599 |
| 22.2  | 100    | 82.2698  | 28628 | 38 | 0.006343 | 0.000141 | 0.001678 |
| 109.7 | 6.139  | 39.3169  | 13722 | 32 | 0.018402 | 0.000273 | 0.001868 |
| 69.5  | 100    | 53.5851  | 17526 | 48 | 0.000464 | 0.000273 | 0.002125 |
| 13.4  | 100    | 16.2154  | 4472  | 22 | 0.183522 | 0.000273 | 0.001842 |
| 7.2   | 100    | 70.2742  | 23933 | 63 | 2.17E-05 | 0.000273 | 0.001951 |
| 44.7  | 100    | 40.3523  | 14135 | 23 | 0.145724 | 0.000525 | 0.002182 |
| 31.2  | 100    | 16.1623  | 4656  | 23 | 0.180531 | 0.000525 | 0.00253  |
| 7.5   | 100    | 59.9177  | 23999 | 39 | 0.005046 | 0.000525 | 0.002238 |
| 6     | 100    | 105.8523 | 38045 | 37 | 0.004907 | 0.00065  | 0.002753 |
| 33.2  | 100    | 54.5066  | 19392 | 42 | 0.002465 | 0.000758 | 0.003006 |
| 85.2  | 5.259  | 39.8197  | 13921 | 26 | 0.080771 | 0.000868 | 0.003424 |
| 54    | 6.598  | 54.0023  | 19187 | 39 | 0.00479  | 0.000951 | 0.004348 |
| 67.9  | 8.063  | 55.0972  | 18100 | 41 | 0.003356 | 0.000951 | 0.004289 |
| 2.2   | 100    | 61.4478  | 22527 | 30 | 0.037149 | 0.000951 | 0.003709 |
| 11.7  | 24.352 | 94.4456  | 35592 | 23 | 0.155755 | 0.000951 | 0.004356 |
| 39.2  | 100    | 14.8882  | 4160  | 17 | 0.920266 | 0.001022 | 0.004954 |
| 102.1 | 100    | 36.5275  | 12232 | 23 | 0.148083 | 0.001022 | 0.005483 |
| 62.4  | 100    | 40.8572  | 14345 | 20 | 0.350658 | 0.001022 | 0.005656 |
| 69.3  | 50.212 | 80.8002  | 28808 | 27 | 0.083917 | 0.001022 | 0.005243 |
| 7     | 100    | 68.934   | 25184 | 59 | 5.25E-05 | 0.001114 | 0.006182 |
| 40.2  | 100    | 41.3702  | 14546 | 16 | 0.712646 | 0.001114 | 0.006261 |
| 18.8  | 100    | 68.8243  | 23710 | 62 | 2.76E-05 | 0.00121  | 0.006489 |
| 84.9  | 100    | 30.7926  | 9388  | 16 | 0.489291 | 0.001308 | 0.007109 |

|       |        |          |       |    |          |          |          |
|-------|--------|----------|-------|----|----------|----------|----------|
| 12.6  | 100    | 16.15    | 4571  | 29 | 0.043705 | 0.001758 | 0.009342 |
| 7.5   | 100    | 104.8459 | 37623 | 29 | 0.03327  | 0.001758 | 0.009312 |
| 35.1  | 100    | 80.2994  | 28596 | 26 | 0.108803 | 0.002012 | 0.01063  |
| 24.9  | 100    | 59.2607  | 19836 | 27 | 0.120416 | 0.002079 | 0.01231  |
| 9.2   | 100    | 76.4016  | 28736 | 29 | 0.04507  | 0.002079 | 0.01158  |
| 63.1  | 100    | 29.6178  | 10345 | 17 | 0.352831 | 0.002079 | 0.01161  |
| 25.5  | 100    | 73.5652  | 27273 | 47 | 0.00047  | 0.002079 | 0.01138  |
| 48.4  | 100    | 30.2916  | 9209  | 21 | 0.168061 | 0.002257 | 0.01259  |
| 1.5   | 100    | 69.4377  | 25379 | 48 | 0.000772 | 0.002315 | 0.01368  |
| 24.4  | 100    | 29.9415  | 9074  | 27 | 0.037779 | 0.002376 | 0.01445  |
| 76.9  | 100    | 51.1167  | 16692 | 30 | 0.028895 | 0.002376 | 0.01473  |
| 86.5  | 100    | 16.5173  | 4805  | 1  | 10.31754 | 0.002376 | 0.01421  |
| 6.1   | 100    | 75.142   | 28195 | 38 | 0.003263 | 0.002376 | 0.01422  |
| 90.3  | 100    | 80.6072  | 30228 | 37 | 0.007019 | 0.002376 | 0.01476  |
| 12.1  | 100    | 19.6926  | 6510  | 49 | 0.000239 | 0.002376 | 0.01521  |
| 4.1   | 100    | 83.5285  | 31038 | 25 | 0.074952 | 0.002543 | 0.01595  |
| 4.3   | 100    | 95.9164  | 35914 | 25 | 0.092411 | 0.002719 | 0.01642  |
| 15    | 100    | 26.4972  | 8416  | 23 | 0.154714 | 0.002777 | 0.01819  |
| 0.4   | 100    | 84.7361  | 31502 | 33 | 0.008449 | 0.002777 | 0.01807  |
| 66.5  | 100    | 14.7706  | 4248  | 11 | 3.235773 | 0.002777 | 0.01817  |
| 85.6  | 79.972 | 54.0554  | 19208 | 26 | 0.096335 | 0.002777 | 0.01785  |
| 6.3   | 100    | 70.3953  | 23979 | 36 | 0.010075 | 0.002777 | 0.0179   |
| 13.9  | 100    | 54.5896  | 17903 | 30 | 0.03623  | 0.002777 | 0.01812  |
| 9.5   | 100    | 83.7869  | 29253 | 25 | 0.135596 | 0.002843 | 0.01905  |
| 3.8   | 100    | 94.9488  | 35813 | 22 | 0.192683 | 0.002843 | 0.01861  |
| 14    | 100    | 55.008   | 19593 | 32 | 0.024811 | 0.003096 | 0.02013  |
| 149   | 50.003 | 51.8436  | 18332 | 36 | 0.007995 | 0.00337  | 0.02167  |
| 127.4 | 1.429  | 53.0807  | 17337 | 47 | 0.00059  | 0.00337  | 0.02161  |
| 25    | 100    | 29.8196  | 9972  | 13 | 1.447122 | 0.003533 | 0.02447  |
| 0.4   | 100    | 85.2436  | 31703 | 35 | 0.00583  | 0.00382  | 0.02785  |
| 10.3  | 100    | 41.1902  | 12934 | 42 | 0.001097 | 0.00382  | 0.02794  |
| 14.5  | 100    | 53.4978  | 18986 | 25 | 0.109846 | 0.004124 | 0.0295   |
| 116.3 | 23.07  | 51.891   | 18352 | 31 | 0.025518 | 0.004192 | 0.03004  |
| 31    | 100    | 75.8602  | 28505 | 20 | 0.284486 | 0.004424 | 0.03175  |
| 23.9  | 100    | 52.7989  | 17225 | 33 | 0.016026 | 0.004643 | 0.03362  |
| 30.4  | 100    | 38.8158  | 13529 | 18 | 0.468195 | 0.004643 | 0.03349  |
| 32.9  | 100    | 60.8055  | 20255 | 15 | 1.707911 | 0.005325 | 0.03727  |
| 5.8   | 100    | 97.1932  | 36755 | 9  | 3.858318 | 0.00573  | 0.041    |
| 1.8   | 100    | 96.0071  | 35951 | 14 | 1.263937 | 0.005792 | 0.04191  |
| 5.8   | 100    | 77.3762  | 29126 | 21 | 0.225767 | 0.006428 | 0.04672  |
| 2.2   | 100    | 97.4642  | 34714 | 9  | 2.02431  | 0.006721 | 0.04895  |
| 1.9   | 100    | 92.0983  | 33451 | 11 | 1.432298 | 0.007636 | 0.05524  |
| 7.8   | 100    | 68.9768  | 25201 | 19 | 0.625089 | 0.0081   | 0.05955  |
| 0     | 100    | 84.8904  | 31567 | 14 | 0.717912 | 0.008293 | 0.06214  |
| 22    | 100    | 30.822   | 10081 | 13 | 2.379477 | 0.008361 | 0.06304  |
| 1.6   | 100    | 97.9077  | 34886 | 12 | 1.135098 | 0.00861  | 0.06583  |
| 0.6   | 100    | 81.75    | 30371 | 10 | 2.580956 | 0.009514 | 0.07629  |
| 14.4  | 100    | 75.6588  | 28414 | 26 | 0.086429 | 0.009818 | 0.07881  |
| 163.2 | 2.232  | 80.1062  | 30007 | 40 | 0.002613 | 0.009858 | 0.08064  |
| 0     | 100    | 15.0342  | 4180  | 68 | 1.56E-07 | 0        | 0.000112 |
| 0     | 100    | 17.0124  | 4876  | 79 | 2.06E-07 | 0        | 1.66E-05 |
| 0     | 100    | 15.5038  | 4348  | 65 | 7.28E-07 | 0        | 0.00019  |

|       |        |          |       |    |          |          |          |
|-------|--------|----------|-------|----|----------|----------|----------|
| 8.7   | 100    | 101.9199 | 39370 | 78 | 6.99E-07 | 0        | 1.81E-06 |
| 136.6 | 100    | 39.5232  | 13809 | 28 | 0.049486 | 0        | 4.63E-05 |
| 36.3  | 100    | 42.3383  | 14482 | 48 | 0.000151 | 0        | 0.000132 |
| 94.6  | 100    | 62.0563  | 24954 | 40 | 0.004359 | 0        | 0.000645 |
| 31.6  | 100    | 53.5234  | 21291 | 35 | 0.011817 | 0        | 0.000697 |
| 59.6  | 100    | 20.9054  | 6498  | 39 | 0.00147  | 0        | 0.000618 |
| 23.7  | 100    | 50.8804  | 20136 | 42 | 0.003153 | 0.000141 | 0.00167  |
| 53    | 100    | 45.649   | 17878 | 35 | 0.009364 | 0.000525 | 0.002474 |
| 0     | 100    | 13.5445  | 3675  | 58 | 1.29E-05 | 0.000868 | 0.003269 |
| 1.9   | 100    | 35.8936  | 12530 | 56 | 4.72E-05 | 0.000951 | 0.004345 |
| 0.4   | 100    | 30.412   | 10210 | 48 | 4.61E-05 | 0.001758 | 0.009113 |
| 86.7  | 100    | 65.034   | 23908 | 37 | 0.003361 | 0.00337  | 0.02272  |
| 3.6   | 100    | 17.375   | 5006  | 41 | 0.000945 | 0.00337  | 0.02358  |
| 21    | 100    | 38.3498  | 13654 | 48 | 0.000519 | 0        | 0.000984 |
| 10.8  | 100    | 100.5054 | 35900 | 32 | 0.023494 | 0        | 0.000382 |
| 23.2  | 100    | 100.4019 | 35859 | 58 | 6.75E-05 | 0        | 1.33E-05 |
| 30.4  | 100    | 62.3152  | 22519 | 45 | 0.001283 | 0        | 3.56E-05 |
| 43.3  | 13.859 | 140.5494 | 55242 | 89 | 4.06E-08 | 0        | 2.52E-08 |
| 8.5   | 100    | 94.2129  | 36080 | 41 | 0.00322  | 0        | 0.000583 |
| 71.7  | 100    | 62.0538  | 22567 | 50 | 0.000408 | 0        | 0.000115 |
| 22    | 100    | 37.7589  | 12936 | 35 | 0.012157 | 0.000141 | 0.001657 |
| 28.6  | 100    | 61.5453  | 22367 | 43 | 0.002265 | 0.000525 | 0.002461 |
| 35.7  | 100    | 61.0425  | 22170 | 43 | 0.001863 | 0.001022 | 0.004763 |
| 3.2   | 100    | 99.9667  | 35686 | 31 | 0.032505 | 0.001022 | 0.004837 |
| 22    | 100    | 66.4378  | 24274 | 38 | 0.003494 | 0.001576 | 0.008765 |
| 5.6   | 100    | 22.2287  | 6586  | 45 | 0.000525 | 0.001576 | 0.008635 |
| 3.7   | 100    | 54.9441  | 18141 | 23 | 0.025078 | 0.002257 | 0.0126   |
| 24.8  | 100    | 64.786   | 23586 | 29 | 0.044251 | 0.002315 | 0.01401  |
| 56.4  | 100    | 37.6224  | 13395 | 36 | 0.00525  | 0.002543 | 0.01635  |
| 89.1  | 100    | 42.9202  | 15261 | 35 | 0.014497 | 0.002719 | 0.01682  |
| 4.2   | 100    | 95.0026  | 35835 | 21 | 0.322829 | 0.002777 | 0.01787  |
| 5.2   | 100    | 66.363   | 24242 | 27 | 0.042112 | 0.00337  | 0.02356  |
| 10.9  | 100    | 50.8872  | 18466 | 24 | 0.188628 | 0.00382  | 0.02795  |
| 30.8  | 100    | 18.943   | 6201  | 28 | 0.011033 | 0        | 0.00076  |
| 1.8   | 100    | 101.1524 | 36154 | 34 | 0.016839 | 0        | 0.000576 |
| 64.2  | 100    | 15.8357  | 5008  | 29 | 0.03494  | 0        | 0.001459 |
| 147.9 | 100    | 13.9719  | 4049  | 72 | 8.34E-07 | 0        | 2.18E-07 |
| 4.2   | 97.901 | 134.9207 | 51654 | 72 | 2.68E-06 | 0        | 2.57E-07 |
| 8     | 100    | 67.7042  | 27361 | 43 | 0.002095 | 0        | 0.000833 |
| 159.6 | 100    | 18.5951  | 6423  | 30 | 0.006216 | 0        | 3.82E-05 |
| 23    | 100    | 60.2335  | 21860 | 90 | 9.46E-09 | 0        | 4.2E-10  |
| 0     | 100    | 101.6612 | 36367 | 24 | 0.150442 | 0.001308 | 0.00703  |
| 10    | 100    | 40.652   | 14261 | 18 | 0.076075 | 0.001498 | 0.007868 |
| 0.9   | 100    | 64.7324  | 23607 | 29 | 0.014145 | 0.001576 | 0.008123 |
| 12.7  | 100    | 73.2767  | 27420 | 32 | 0.009322 | 0.002315 | 0.01402  |
| 7.2   | 100    | 66.2485  | 26724 | 14 | 1.272187 | 0.00337  | 0.0232   |
| 52    | 100    | 73.4745  | 27502 | 36 | 0.003943 | 0.004124 | 0.02972  |
| 48.7  | 100    | 77.646   | 29245 | 25 | 0.032577 | 0.004344 | 0.03164  |
| 56.3  | 42.834 | 73.2184  | 27395 | 31 | 0.014131 | 0.005792 | 0.04182  |
| 2.1   | 100    | 59.7332  | 21677 | 17 | 0.181987 | 0.00861  | 0.06497  |
| 16.1  | 100    | 63.4516  | 21278 | 42 | 0.001971 | 0        | 0.000722 |
| 1.3   | 100    | 124.1181 | 47042 | 29 | 0.025922 | 0        | 0.000641 |



|       |        |          |       |     |          |          |          |
|-------|--------|----------|-------|-----|----------|----------|----------|
| 36.5  | 100    | 22.2584  | 7010  | 32  | 0.013288 | 0        | 6.41E-05 |
| 23.7  | 100    | 25.4092  | 8755  | 44  | 0.001115 | 0.000141 | 0.001581 |
| 47.6  | 100    | 55.1884  | 21999 | 35  | 0.015485 | 0.000141 | 0.001581 |
| 16    | 100    | 65.6531  | 22132 | 41  | 0.002478 | 0.000525 | 0.002229 |
| 8.1   | 100    | 96.7174  | 36221 | 36  | 0.009025 | 0.000758 | 0.003011 |
| 0     | 100    | 107.3369 | 40338 | 26  | 0.072353 | 0.001022 | 0.00503  |
| 52.9  | 100    | 62.186   | 20781 | 44  | 0.000579 | 0.001022 | 0.004627 |
| 22.5  | 100    | 69.4861  | 25893 | 34  | 0.015992 | 0.002257 | 0.01278  |
| 20.6  | 100    | 23.5119  | 8034  | 40  | 0.002873 | 0.003533 | 0.02454  |
| 51.3  | 100    | 53.2898  | 21200 | 38  | 0.006136 | 0        | 2.35E-05 |
| 50    | 100    | 34.1234  | 11664 | 48  | 0.000577 | 0.000951 | 0.003834 |
| 17.7  | 100    | 52.059   | 19449 | 51  | 0.000187 | 0.001022 | 0.004904 |
| 10.3  | 100    | 117.7234 | 43029 | 35  | 0.012496 | 0.001022 | 0.005767 |
| 2.3   | 100    | 130.2226 | 49657 | 17  | 0.470779 | 0.001022 | 0.005652 |
| 18    | 100    | 43.5686  | 14965 | 28  | 0.056349 | 0.001114 | 0.006148 |
| 81.1  | 100    | 57.0329  | 21380 | 47  | 0.000757 | 0.001114 | 0.006117 |
| 43.9  | 86.041 | 53.7291  | 19091 | 43  | 0.001751 | 0.001758 | 0.009292 |
| 0.4   | 100    | 99.3097  | 38260 | 28  | 0.038139 | 0.002079 | 0.01202  |
| 5.5   | 100    | 58.871   | 21567 | 25  | 0.11601  | 0.002315 | 0.01312  |
| 6.4   | 100    | 117.366  | 42868 | 21  | 0.335784 | 0.002376 | 0.01426  |
| 105.8 | 100    | 27.9591  | 10469 | 20  | 0.235883 | 0.004504 | 0.03182  |
| 140.2 | 100    | 34.289   | 11734 | 38  | 0.00624  | 0.004643 | 0.03321  |
| 17.8  | 100    | 48.3777  | 15607 | 53  | 0.000187 | 0        | 8.86E-05 |
| 17.8  | 100    | 48.3777  | 15607 | 53  | 0.000187 | 0        | 8.86E-05 |
| 34.1  | 82.327 | 48.8817  | 15816 | 64  | 1.33E-05 | 0        | 2.25E-05 |
| 34.1  | 82.327 | 48.8817  | 15816 | 64  | 1.33E-05 | 0        | 2.25E-05 |
| 104.7 | 100    | 48.7699  | 15772 | 60  | 3.62E-05 | 0        | 3.29E-05 |
| 104.7 | 100    | 48.7699  | 15772 | 60  | 3.62E-05 | 0        | 3.29E-05 |
| 17.9  | 100    | 56.6071  | 18792 | 43  | 0.001567 | 0        | 0.000563 |
| 7.2   | 100    | 46.8584  | 15023 | 44  | 0.001313 | 0        | 0.000412 |
| 60.6  | 100    | 71.5641  | 24838 | 37  | 0.007456 | 0        | 0.000116 |
| 16.2  | 100    | 72.4133  | 25191 | 34  | 0.015244 | 0        | 0.000972 |
| 4.7   | 100    | 77.8208  | 31679 | 57  | 4.73E-05 | 0        | 0.000248 |
| 18.2  | 100    | 73.9068  | 25819 | 35  | 0.012063 | 0        | 0.001266 |
| 18.7  | 100    | 60.5211  | 20344 | 39  | 0.002184 | 0        | 0.000588 |
| 35.2  | 100    | 59.4949  | 19923 | 34  | 0.008292 | 0        | 3.34E-05 |
| 32.5  | 100    | 60.0117  | 20127 | 54  | 6.91E-05 | 0        | 1.4E-08  |
| 76.3  | 44.062 | 60.0016  | 20123 | 33  | 0.009219 | 0        | 2.21E-05 |
| 33.7  | 100    | 69.5479  | 24005 | 58  | 5.31E-05 | 0        | 2.15E-07 |
| 20.5  | 5.393  | 70.0519  | 24213 | 88  | 5.66E-08 | 0        | 5.1E-08  |
| 21    | 87.595 | 70.0923  | 24228 | 93  | 1.94E-08 | 0        | 2.75E-08 |
| 17.8  | 100    | 68.7027  | 23656 | 39  | 0.00606  | 0        | 0.001484 |
| 16.9  | 100    | 71.06    | 24633 | 63  | 1.96E-05 | 0        | 2.3E-06  |
| 24.9  | 44.488 | 70.558   | 24424 | 88  | 5.65E-08 | 0        | 2.58E-09 |
| 5.5   | 25.385 | 66.2711  | 22667 | 99  | 5.22E-09 | 0        | 6.95E-08 |
| 0     | 45.237 | 66.2829  | 22672 | 105 | 1.41E-09 | 0        | 2.45E-07 |
| 14.3  | 100    | 66.7727  | 22880 | 99  | 5.2E-09  | 0        | 2.7E-08  |
| 0.6   | 100    | 66.7865  | 22886 | 61  | 3.36E-05 | 0        | 0.000421 |
| 11    | 100    | 65.7653  | 22458 | 99  | 5.39E-09 | 0        | 3.75E-08 |
| 1.4   | 100    | 65.7816  | 22465 | 73  | 1.97E-06 | 0        | 6.73E-05 |
| 5.9   | 100    | 67.7797  | 23288 | 74  | 1.64E-06 | 0        | 1.2E-05  |
| 10.6  | 100    | 67.2753  | 23089 | 48  | 0.000763 | 0        | 0.000234 |

|       |        |          |       |     |          |          |          |
|-------|--------|----------|-------|-----|----------|----------|----------|
| 2.4   | 100    | 90.7017  | 32036 | 35  | 0.012328 | 0        | 0.000169 |
| 3.1   | 100    | 89.5853  | 31592 | 65  | 1.31E-05 | 0        | 4.21E-08 |
| 7.8   | 100    | 89.1591  | 31418 | 68  | 6.6E-06  | 0        | 1.1E-09  |
| 7.5   | 100    | 89.0835  | 31387 | 68  | 6.02E-06 | 0        | 7.51E-10 |
| 9.5   | 100    | 82.7206  | 28819 | 65  | 1.34E-05 | 0        | 2.06E-08 |
| 4.2   | 100    | 111.7949 | 43437 | 42  | 0.001527 | 0        | 0.000533 |
| 6.9   | 100    | 113.4699 | 42404 | 27  | 0.081002 | 0        | 0.000742 |
| 10.1  | 100    | 112.2857 | 43660 | 62  | 1.57E-05 | 0        | 1.95E-05 |
| 27.2  | 100    | 112.3141 | 43672 | 57  | 4.7E-05  | 0        | 0.0001   |
| 1.9   | 100    | 103.5974 | 38339 | 40  | 0.003328 | 0        | 0.00068  |
| 63    | 13.125 | 140.676  | 54235 | 99  | 4.95E-09 | 0        | 4.89E-09 |
| 128.1 | 90.439 | 140.6324 | 54209 | 104 | 1.3E-09  | 0        | 3.51E-11 |
| 52.4  | 100    | 140.4736 | 54127 | 111 | 3.95E-10 | 0        | 2.71E-09 |
| 77.1  | 14.02  | 140.4658 | 54123 | 89  | 5.64E-08 | 0        | 2.6E-06  |
| 3.2   | 100    | 140.3737 | 54514 | 40  | 0.003577 | 0        | 0.000107 |
| 4.5   | 26.808 | 120.4865 | 45457 | 64  | 1.74E-05 | 0        | 4.57E-06 |
| 0     | 56.739 | 123.5398 | 46799 | 40  | 0.0033   | 0        | 0.000113 |
| 6.2   | 100    | 123.0879 | 46603 | 41  | 0.002782 | 0        | 0.000323 |
| 13.4  | 100    | 122.0253 | 46148 | 32  | 0.01878  | 0        | 0.000295 |
| 12.6  | 100    | 50.2718  | 19872 | 54  | 0.000143 | 0        | 0.00019  |
| 12.6  | 100    | 50.2718  | 19872 | 54  | 0.000143 | 0        | 0.00019  |
| 17.5  | 100    | 51.1178  | 20241 | 25  | 0.125965 | 0        | 0.001514 |
| 61.3  | 100    | 51.1703  | 20265 | 34  | 0.01768  | 0        | 1.59E-05 |
| 24.5  | 100    | 51.6726  | 20484 | 29  | 0.050383 | 0        | 0.000982 |
| 17.9  | 61.635 | 51.6248  | 20464 | 49  | 0.000575 | 0        | 2.59E-05 |
| 109.9 | 42.046 | 74.3348  | 30236 | 42  | 0.001555 | 0        | 0.000227 |
| 3     | 100    | 74.764   | 30413 | 49  | 0.000313 | 0        | 0.000905 |
| 1.7   | 100    | 103.0957 | 38130 | 43  | 0.001739 | 0.000273 | 0.00184  |
| 1.7   | 100    | 140.364  | 54510 | 28  | 0.049199 | 0.000273 | 0.001829 |
| 6.7   | 100    | 140.6887 | 54242 | 38  | 0.006262 | 0.000525 | 0.002186 |
| 19.4  | 100    | 56.1781  | 18619 | 34  | 0.011618 | 0.000758 | 0.003061 |
| 0.5   | 100    | 120.9907 | 45676 | 39  | 0.005808 | 0.000868 | 0.003293 |
| 3.5   | 100    | 120.6632 | 45535 | 33  | 0.022706 | 0.000868 | 0.00329  |
| 36.7  | 100    | 50.0983  | 16299 | 34  | 0.014019 | 0.000951 | 0.004344 |
| 67.8  | 100    | 60.511   | 20339 | 23  | 0.101813 | 0.000951 | 0.003982 |
| 12.6  | 100    | 90.0867  | 31793 | 13  | 1.968185 | 0.001677 | 0.008916 |
| 13.5  | 100    | 72.9775  | 25419 | 30  | 0.034377 | 0.001758 | 0.009675 |
| 21    | 100    | 74.603   | 26116 | 25  | 0.125862 | 0.002012 | 0.01064  |
| 23.3  | 100    | 137.8373 | 52907 | 16  | 0.863935 | 0.002079 | 0.01138  |
| 1.5   | 100    | 111.8159 | 43446 | 43  | 0.000734 | 0.002079 | 0.01211  |
| 3.5   | 100    | 69.7663  | 24093 | 26  | 0.088973 | 0.002376 | 0.01469  |
| 2.2   | 100    | 70.2757  | 24304 | 26  | 0.101276 | 0.00337  | 0.02273  |
| 3.9   | 100    | 80.3391  | 28615 | 24  | 0.146914 | 0.003736 | 0.02753  |
| 0.3   | 100    | 113.6514 | 42490 | 23  | 0.193481 | 0.004192 | 0.03062  |
| 0     | 100    | 122.1244 | 46192 | 24  | 0.112755 | 0.004504 | 0.03218  |
| 19.7  | 100    | 69.9167  | 24156 | 9   | 5.27867  | 0.004581 | 0.03259  |
| 15    | 100    | 90.0944  | 31796 | 4   | 16.09279 | 0.005792 | 0.04168  |
| 8     | 100    | 17.09    | 5056  | 46  | 0.00105  | 0        | 9.12E-05 |
| 4.5   | 43.402 | 55.0383  | 20101 | 73  | 1.5E-06  | 0        | 0.000119 |
| 3.7   | 100    | 54.5394  | 19895 | 56  | 8.72E-05 | 0        | 0.001537 |
| 11.5  | 100    | 17.1499  | 5362  | 42  | 0.002372 | 0        | 3.33E-05 |
| 0     | 100    | 54.1362  | 19240 | 54  | 0.000135 | 0        | 0.001476 |

|       |        |          |       |     |          |          |          |
|-------|--------|----------|-------|-----|----------|----------|----------|
| 21.3  | 20.015 | 61.1325  | 22046 | 55  | 0.000104 | 0        | 2.19E-05 |
| 40    | 5.017  | 61.1058  | 22034 | 58  | 5.48E-05 | 0        | 3.67E-05 |
| 6.8   | 100    | 60.6276  | 21832 | 42  | 0.001939 | 0        | 0.000227 |
| 6.8   | 100    | 61.7017  | 22269 | 51  | 0.000264 | 0        | 0.00016  |
| 18.2  | 100    | 130.1485 | 50730 | 85  | 1.47E-07 | 0        | 6.1E-10  |
| 26.6  | 23.466 | 140.27   | 55093 | 121 | 3.17E-11 | 0        | 8.29E-14 |
| 17.5  | 100    | 140.2842 | 55100 | 129 | 4.98E-12 | 0        | 2.64E-14 |
| 4.3   | 100    | 113.206  | 43565 | 47  | 0.000916 | 0        | 0.000364 |
| 1.1   | 100    | 113.711  | 43780 | 47  | 0.000848 | 0        | 0.000185 |
| 4.6   | 100    | 117.4538 | 45806 | 37  | 0.002366 | 0        | 0.001408 |
| 6     | 100    | 113.2467 | 44092 | 40  | 0.001102 | 0        | 0.000162 |
| 16.8  | 67.643 | 126.0063 | 49264 | 63  | 2.22E-05 | 0        | 2.92E-06 |
| 9.6   | 17.696 | 125.9978 | 49260 | 67  | 8.45E-06 | 0        | 1.25E-06 |
| 4.1   | 100    | 125.4944 | 49041 | 50  | 0.000414 | 0        | 7.69E-05 |
| 295.8 | 100    | 18.9687  | 5705  | 57  | 9.29E-05 | 0        | 6.94E-05 |
| 188.6 | 36.593 | 19.4684  | 5874  | 61  | 3.46E-05 | 0        | 4.4E-05  |
| 10.1  | 100    | 19.486   | 5880  | 63  | 2E-05    | 0        | 0.000569 |
| 130.6 | 100    | 19.9702  | 6046  | 51  | 0.000361 | 0        | 9.17E-05 |
| 12.5  | 100    | 115.8445 | 44213 | 45  | 0.000372 | 0        | 9.77E-05 |
| 48.9  | 17.908 | 114.8405 | 43841 | 82  | 7.46E-08 | 0        | 3.82E-07 |
| 22.4  | 26.101 | 114.8843 | 43856 | 59  | 1.53E-05 | 0        | 2.58E-05 |
| 13.6  | 100    | 115.3445 | 44025 | 63  | 5.8E-06  | 0        | 1.88E-06 |
| 10.9  | 100    | 115.3895 | 44042 | 55  | 4.48E-05 | 0        | 4.33E-06 |
| 11.4  | 63.744 | 134.2012 | 51346 | 72  | 3.03E-06 | 0        | 9.76E-07 |
| 12.6  | 100    | 116.3465 | 44407 | 59  | 1.55E-05 | 0        | 9.04E-06 |
| 44.6  | 39.729 | 118.0384 | 45057 | 85  | 3.93E-08 | 0        | 8.39E-08 |
| 24.9  | 91.165 | 118.3341 | 45170 | 59  | 1.39E-05 | 0        | 1.28E-05 |
| 14.4  | 100    | 118.5439 | 45246 | 73  | 5.97E-07 | 0        | 6.76E-07 |
| 10.4  | 100    | 116.3486 | 44408 | 53  | 5.85E-05 | 0        | 1.4E-05  |
| 3.3   | 100    | 44.3175  | 15277 | 47  | 0.000695 | 0        | 0.00133  |
| 53    | 100    | 44.7302  | 15442 | 41  | 0.003041 | 0        | 0.00041  |
| 20.2  | 100    | 44.823   | 15483 | 39  | 0.004438 | 0        | 0.000105 |
| 60.3  | 2.864  | 114.3392 | 43654 | 78  | 1.72E-07 | 0        | 2.49E-06 |
| 37.8  | 4.664  | 114.3798 | 43669 | 59  | 1.47E-05 | 0        | 1.13E-05 |
| 22.3  | 20.144 | 113.3982 | 43290 | 47  | 0.000114 | 0        | 0.001025 |
| 0     | 100    | 48.1647  | 18945 | 58  | 1.33E-05 | 0        | 2.25E-06 |
| 9.8   | 100    | 47.7128  | 18743 | 56  | 2.12E-05 | 0        | 1.48E-07 |
| 42.9  | 100    | 56.817   | 20566 | 83  | 7.38E-08 | 0        | 1.31E-09 |
| 320.7 | 10.097 | 140.7621 | 54283 | 70  | 3.69E-06 | 0        | 4.95E-06 |
| 10.4  | 66.382 | 140.775  | 54293 | 53  | 0.000175 | 0        | 3.34E-05 |
| 40.5  | 100    | 13.1616  | 3560  | 32  | 0.02673  | 0.000141 | 0.001772 |
| 7.3   | 100    | 53.5602  | 17598 | 56  | 8.5E-05  | 0.000141 | 0.001713 |
| 56.6  | 100    | 20.8674  | 6365  | 32  | 0.024801 | 0.000273 | 0.001943 |
| 2.6   | 100    | 113.8749 | 43466 | 38  | 0.002123 | 0.000273 | 0.001951 |
| 2.7   | 100    | 132.6326 | 48910 | 26  | 0.111578 | 0.000525 | 0.002344 |
| 3.2   | 100    | 133.6977 | 51120 | 20  | 0.518147 | 0.000525 | 0.002184 |
| 3.4   | 100    | 129.6434 | 50519 | 25  | 0.1517   | 0.000525 | 0.002589 |
| 29.7  | 100    | 140.6971 | 54246 | 32  | 0.026839 | 0.00065  | 0.002708 |
| 2.2   | 100    | 117.1712 | 44729 | 30  | 0.012687 | 0.000758 | 0.003095 |
| 67.6  | 79.659 | 56.4039  | 20412 | 22  | 0.106839 | 0.000868 | 0.003491 |
| 4.1   | 100    | 17.1304  | 4788  | 38  | 0.005889 | 0.000868 | 0.0035   |
| 3.3   | 100    | 54.6229  | 17916 | 43  | 0.001504 | 0.00121  | 0.0065   |

|       |        |          |       |    |          |          |          |
|-------|--------|----------|-------|----|----------|----------|----------|
| 76.8  | 9.674  | 72.8541  | 29609 | 44 | 0.001779 | 0.001576 | 0.008552 |
| 0     | 100    | 47.647   | 18713 | 25 | 0.026818 | 0.002079 | 0.01222  |
| 2.9   | 100    | 113.6441 | 44270 | 28 | 0.016971 | 0.002257 | 0.01282  |
| 24.4  | 100    | 18.9851  | 5711  | 46 | 0.001112 | 0.002315 | 0.01306  |
| 6.8   | 100    | 60.6025  | 21822 | 22 | 0.222576 | 0.002376 | 0.01441  |
| 0     | 100    | 126.2979 | 49115 | 21 | 0.32582  | 0.002376 | 0.01513  |
| 0.5   | 100    | 125.3728 | 48994 | 29 | 0.036718 | 0.002777 | 0.01696  |
| 1.8   | 100    | 132.6065 | 50654 | 21 | 0.369574 | 0.002843 | 0.01908  |
| 0     | 100    | 126.5021 | 49461 | 30 | 0.049927 | 0.003533 | 0.02472  |
| 1.7   | 100    | 140.2929 | 55104 | 22 | 0.291775 | 0.004266 | 0.03082  |
| 10.3  | 100    | 61.8607  | 20655 | 21 | 0.246311 | 0.007785 | 0.05553  |
| 0.9   | 100    | 125.6671 | 49114 | 19 | 0.553809 | 0.008559 | 0.06464  |
| 0     | 100    | 125.7749 | 49162 | 26 | 0.089235 | 0.008962 | 0.06762  |
| 70.5  | 37.931 | 77.197   | 28622 | 56 | 0.000101 | 0        | 2.52E-05 |
| 18    | 100    | 25.9158  | 8489  | 40 | 0.003742 | 0        | 0.000369 |
| 97.5  | 51.508 | 43.9861  | 15766 | 47 | 0.000715 | 0        | 0.000644 |
| 25.4  | 100    | 57.8318  | 21190 | 41 | 0.003459 | 0        | 0.001193 |
| 17.3  | 100    | 26.877   | 9280  | 41 | 0.002879 | 0        | 0.000185 |
| 294.8 | 62.495 | 36.498   | 11324 | 42 | 0.001083 | 0        | 0.00055  |
| 0     | 100    | 102.4451 | 36691 | 56 | 1.21E-05 | 0        | 3.28E-06 |
| 13.3  | 100    | 138.1016 | 51161 | 96 | 1.28E-08 | 0        | 1.56E-11 |
| 10.7  | 100    | 138.6072 | 51389 | 89 | 5.77E-08 | 0        | 4.02E-11 |
| 7     | 100    | 96.6328  | 37098 | 35 | 0.008156 | 0        | 7.24E-05 |
| 11.9  | 100    | 97.1338  | 37309 | 64 | 9.91E-06 | 0        | 1.68E-07 |
| 14.2  | 100    | 43.5665  | 15442 | 42 | 0.000711 | 0        | 0.000407 |
| 4     | 100    | 98.0776  | 37567 | 62 | 1.54E-05 | 0        | 1.17E-05 |
| 36.4  | 100    | 69.2212  | 25429 | 53 | 0.000101 | 0        | 0.000623 |
| 9.5   | 100    | 43.2351  | 16833 | 58 | 5.59E-05 | 0        | 1.8E-06  |
| 171.5 | 94.734 | 23.4928  | 8603  | 34 | 0.013606 | 0        | 0.000803 |
| 46.3  | 100    | 18.9848  | 6610  | 51 | 0.000188 | 0        | 6.96E-06 |
| 1.8   | 100    | 102.1366 | 36572 | 15 | 0.157529 | 0.001022 | 0.005259 |
| 5.8   | 100    | 77.2081  | 28627 | 34 | 0.016518 | 0.001022 | 0.005775 |
| 12.6  | 100    | 44.0627  | 15796 | 34 | 0.015371 | 0.001758 | 0.009297 |
| 50.3  | 100    | 36.6534  | 11377 | 37 | 0.002889 | 0.002079 | 0.01229  |
| 119.4 | 100    | 16.6469  | 5120  | 44 | 0.001954 | 0.002376 | 0.01475  |
| 215.9 | 90.609 | 17.1428  | 5667  | 31 | 0.024021 | 0.002543 | 0.01567  |
| 1.3   | 100    | 99.7687  | 38471 | 17 | 0.519158 | 0.002777 | 0.01806  |
| 0.8   | 100    | 92.3573  | 35308 | 29 | 0.021127 | 0.002777 | 0.01724  |
| 19.2  | 100    | 42.8387  | 16665 | 10 | 3.562792 | 0.009514 | 0.07639  |
| 11.8  | 100    | 64.7204  | 23791 | 39 | 0.00585  | 0        | 0.000282 |
| 17.1  | 100    | 73.8914  | 25812 | 49 | 0.00047  | 0        | 0.000199 |
| 18.6  | 100    | 62.2528  | 20806 | 66 | 1.14E-05 | 0        | 3.51E-06 |
| 5.5   | 100    | 107.5719 | 38787 | 55 | 0.000149 | 0        | 0.000191 |
| 20.8  | 100    | 71.326   | 24332 | 43 | 0.002099 | 0        | 0.000277 |
| 45.5  | 84.63  | 140.3442 | 52190 | 77 | 6.02E-07 | 0        | 5.67E-12 |
| 16.2  | 100    | 73.6072  | 27291 | 67 | 7.07E-06 | 0        | 1.62E-05 |
| 27.9  | 100    | 65.1237  | 21928 | 34 | 0.017202 | 0.000951 | 0.004388 |
| 24    | 100    | 52.7101  | 20941 | 24 | 0.120503 | 0.000951 | 0.003829 |
| 33.3  | 100    | 64.9675  | 21869 | 32 | 0.027141 | 0.002079 | 0.01229  |
| 3.5   | 100    | 71.0337  | 24225 | 27 | 0.094618 | 0.002719 | 0.01667  |
| 2.2   | 100    | 90.5169  | 33812 | 23 | 0.184388 | 0.002777 | 0.01711  |
| 9.9   | 100    | 78.7111  | 32053 | 26 | 0.116812 | 0.003674 | 0.02549  |

|       |        |          |       |     |          |          |          |
|-------|--------|----------|-------|-----|----------|----------|----------|
| 3.7   | 100    | 92.6855  | 34616 | 25  | 0.152045 | 0.003674 | 0.02599  |
| 16.1  | 100    | 52.8526  | 21004 | 19  | 0.388571 | 0.004192 | 0.02992  |
| 3.1   | 100    | 90.7959  | 33916 | 18  | 0.590735 | 0.008034 | 0.05874  |
| 3.1   | 100    | 38.1622  | 11866 | 30  | 0.031275 | 0        | 0.000904 |
| 10.3  | 100    | 38.1017  | 11843 | 34  | 0.014682 | 0        | 1.02E-05 |
| 8.3   | 100    | 34.4533  | 10572 | 32  | 0.019475 | 0        | 0.000164 |
| 1.8   | 100    | 34.4558  | 10573 | 33  | 0.013117 | 0        | 0.000287 |
| 8.3   | 100    | 66.5933  | 22807 | 31  | 0.027435 | 0        | 0.000376 |
| 29.4  | 100    | 65.6344  | 22401 | 35  | 0.010165 | 0        | 0.000149 |
| 33.8  | 23.828 | 66.0887  | 22592 | 30  | 0.032251 | 0        | 1.87E-05 |
| 42    | 56.264 | 66.1399  | 22612 | 59  | 3.91E-05 | 0        | 2.58E-08 |
| 1.4   | 35.455 | 140.8576 | 55415 | 99  | 2.35E-09 | 0        | 2.99E-06 |
| 668.1 | 65.523 | 140.717  | 55337 | 73  | 1.35E-06 | 0        | 5.59E-08 |
| 12.4  | 100    | 90.9708  | 32140 | 65  | 9.69E-06 | 0        | 1.11E-05 |
| 7.3   | 100    | 88.5753  | 33214 | 56  | 7.72E-05 | 0        | 4.86E-05 |
| 21.6  | 76.028 | 86.5128  | 32773 | 74  | 1.34E-06 | 0        | 7.42E-07 |
| 57.3  | 34.813 | 86.1363  | 32602 | 46  | 0.000874 | 0        | 7.03E-06 |
| 15.9  | 100    | 86.6435  | 32826 | 51  | 0.000272 | 0        | 3.51E-06 |
| 13.5  | 100    | 62.4535  | 22994 | 58  | 5.08E-05 | 0        | 0.00074  |
| 137.3 | 71.817 | 140.3055 | 54044 | 40  | 0.003166 | 0        | 2.44E-08 |
| 36.3  | 100    | 140.3513 | 54067 | 43  | 0.001921 | 0        | 7.03E-06 |
| 8.3   | 39.351 | 141.4742 | 54717 | 102 | 2.14E-09 | 0        | 4.43E-11 |
| 81.9  | 100    | 141.4709 | 54715 | 111 | 2.68E-10 | 0        | 2.74E-12 |
| 16.2  | 20.171 | 141.4483 | 54701 | 114 | 1.3E-10  | 0        | 4.17E-15 |
| 16.6  | 54.809 | 67.6873  | 27353 | 100 | 1.24E-09 | 0        | 7.83E-15 |
| 2.8   | 62.571 | 67.7356  | 27376 | 60  | 1.2E-05  | 0        | 1.39E-07 |
| 0     | 100    | 64.7442  | 22025 | 48  | 0.000139 | 0.000273 | 0.001832 |
| 8.6   | 100    | 83.7029  | 31530 | 26  | 0.091854 | 0.000951 | 0.004206 |
| 3.2   | 100    | 88.2053  | 33051 | 31  | 0.024427 | 0.00121  | 0.006788 |
| 9.3   | 100    | 60.8673  | 20479 | 23  | 0.189684 | 0.002315 | 0.01394  |
| 57.7  | 18.064 | 75.2689  | 27728 | 38  | 0.004453 | 0.002315 | 0.01377  |
| 3.2   | 100    | 95.2725  | 36539 | 21  | 0.254071 | 0.002543 | 0.01614  |
| 0     | 100    | 67.6033  | 27315 | 29  | 0.010229 | 0.002843 | 0.01898  |
| 28.2  | 100    | 72.5133  | 26867 | 51  | 0.000234 | 0.003096 | 0.01971  |
| 0.9   | 100    | 95.0552  | 36446 | 22  | 0.208852 | 0.003254 | 0.02109  |
| 0.4   | 100    | 34.9655  | 10752 | 19  | 0.38494  | 0.00337  | 0.0234   |
| 2     | 100    | 90.7783  | 32064 | 22  | 0.212533 | 0.003674 | 0.02501  |
| 3     | 100    | 90.4674  | 31942 | 22  | 0.211205 | 0.003674 | 0.02649  |
| 0     | 100    | 95.8426  | 36653 | 21  | 0.277911 | 0.00599  | 0.04541  |
| 12.6  | 100    | 75.7701  | 27941 | 36  | 0.007855 | 0.006428 | 0.04736  |
| 6.2   | 100    | 60.9597  | 20515 | 24  | 0.169516 | 0.006872 | 0.04987  |
| 21    | 100    | 46.4506  | 14873 | 7   | 7.023205 | 0.009436 | 0.07121  |
| 10    | 100    | 100.8323 | 37902 | 50  | 0.000397 | 0        | 0.000481 |
| 40.4  | 13.154 | 97.9684  | 36728 | 51  | 0.000277 | 0        | 0.000948 |
| 57.5  | 100    | 57.787   | 19278 | 16  | 0.146013 | 0        | 0.000271 |
| 21.1  | 100    | 41.2569  | 12957 | 28  | 0.057777 | 0        | 0.000894 |
| 33.1  | 100    | 45.3379  | 15752 | 59  | 2.21E-05 | 0        | 8.18E-05 |
| 5     | 100    | 34.3871  | 11652 | 62  | 2.48E-05 | 0        | 0.000697 |
| 70.5  | 100    | 34.3698  | 11646 | 40  | 0.003526 | 0        | 0.000346 |
| 51.2  | 100    | 33.8646  | 11455 | 25  | 0.114445 | 0        | 0.001446 |
| 12.5  | 100    | 37.0366  | 11468 | 75  | 1.18E-06 | 0        | 0.00026  |
| 19.2  | 100    | 51.3162  | 16669 | 49  | 0.000494 | 0        | 0.001125 |

|       |        |          |       |     |          |          |          |
|-------|--------|----------|-------|-----|----------|----------|----------|
| 165.4 | 50.281 | 51.3138  | 16668 | 43  | 0.002059 | 0        | 0.000932 |
| 36.7  | 33.931 | 140.6833 | 55318 | 89  | 1.7E-08  | 0        | 1.78E-11 |
| 14.7  | 7.096  | 140.6815 | 55316 | 102 | 9.21E-10 | 0        | 1.04E-11 |
| 192.9 | 48.95  | 140.4338 | 55176 | 121 | 3.39E-11 | 0        | 1.02E-11 |
| 82.9  | 20.166 | 140.4303 | 55173 | 75  | 1.43E-06 | 0        | 4.74E-09 |
| 10.7  | 36.979 | 140.2748 | 52156 | 65  | 1.1E-05  | 0        | 5.26E-09 |
| 62.1  | 100    | 140.2771 | 52157 | 114 | 1.27E-10 | 0        | 6.87E-11 |
| 119.6 | 10.914 | 140.2722 | 52154 | 86  | 7.75E-08 | 0        | 1.29E-12 |
| 15.5  | 100    | 140.3943 | 52214 | 70  | 4.29E-06 | 0        | 2.2E-07  |
| 73.4  | 100    | 36.6388  | 12650 | 54  | 0.000171 | 0        | 0.000962 |
| 173.9 | 87.616 | 141.1619 | 54530 | 102 | 6.24E-10 | 0        | 5.51E-10 |
| 20.2  | 100    | 98.018   | 36746 | 39  | 0.004239 | 0.000273 | 0.002067 |
| 13.5  | 100    | 97.4644  | 36530 | 41  | 0.002284 | 0.000758 | 0.003167 |
| 18.6  | 100    | 34.4844  | 10583 | 30  | 0.041456 | 0.000951 | 0.004565 |
| 27.7  | 100    | 45.3162  | 15742 | 40  | 0.001807 | 0.000951 | 0.004311 |
| 3.9   | 100    | 98.4724  | 36916 | 34  | 0.013742 | 0.001114 | 0.006365 |
| 3.2   | 100    | 33.8867  | 11464 | 44  | 0.001555 | 0.00121  | 0.006763 |
| 30.9  | 100    | 65.7472  | 22450 | 20  | 0.230853 | 0.001758 | 0.009278 |
| 38    | 100    | 57.7929  | 19281 | 27  | 0.059273 | 0.002079 | 0.01214  |
| 0.4   | 100    | 28.1272  | 9770  | 41  | 0.003183 | 0.002719 | 0.01678  |
| 13.5  | 100    | 68.3792  | 23194 | 29  | 0.041316 | 0.003254 | 0.02093  |
| 30.6  | 100    | 68.5098  | 23244 | 22  | 0.182516 | 0.007636 | 0.05513  |
| 48.1  | 100    | 57.2915  | 19075 | 15  | 0.949419 | 0.009818 | 0.07951  |
| 31    | 100    | 43.9648  | 13942 | 27  | 0.079964 | 0        | 0.001234 |
| 82.1  | 14.206 | 44.469   | 14124 | 34  | 0.014557 | 0        | 0.000256 |
| 82.3  | 76.265 | 44.9737  | 14301 | 34  | 0.015014 | 0        | 0.00022  |
| 17.9  | 100    | 77.8183  | 31678 | 100 | 4.09E-09 | 0        | 5.79E-07 |
| 24.6  | 92.946 | 59.7403  | 21882 | 44  | 0.000838 | 0        | 4.14E-05 |
| 6.4   | 100    | 137.891  | 51060 | 34  | 0.017756 | 0        | 0.000491 |
| 65.5  | 26.482 | 77.4554  | 31527 | 80  | 4.14E-07 | 0        | 5E-07    |
| 29.9  | 66.913 | 57.4047  | 20527 | 48  | 0.000252 | 0        | 1E-07    |
| 27.8  | 93.584 | 57.3545  | 20504 | 50  | 0.000142 | 0        | 5.55E-08 |
| 24.3  | 100    | 57.2813  | 20473 | 53  | 8.44E-05 | 0        | 1.54E-06 |
| 1.6   | 68.614 | 136.2877 | 53316 | 57  | 8.35E-05 | 0        | 4.59E-05 |
| 32.7  | 8.165  | 136.2272 | 53292 | 84  | 1.74E-07 | 0        | 2.6E-07  |
| 2     | 100    | 95.1023  | 36374 | 49  | 0.00039  | 0        | 0.000312 |
| 24.7  | 100    | 95.5718  | 36551 | 61  | 2.9E-05  | 0        | 4.14E-06 |
| 5.6   | 100    | 95.6031  | 36563 | 57  | 7.28E-05 | 0        | 0.000215 |
| 28.2  | 57.731 | 70.9995  | 28804 | 67  | 9.14E-06 | 0        | 0.000866 |
| 5.3   | 100    | 69.9723  | 28348 | 67  | 8.87E-06 | 0        | 2.93E-08 |
| 98.3  | 26.999 | 66.5059  | 26836 | 54  | 0.000166 | 0        | 0.000853 |
| 43.7  | 12.885 | 77.3073  | 31465 | 74  | 1.69E-06 | 0        | 3.09E-06 |
| 16.7  | 100    | 45.9598  | 18016 | 57  | 7.26E-05 | 0.000141 | 0.001567 |
| 8.6   | 55.315 | 77.3762  | 31494 | 33  | 0.022506 | 0.000525 | 0.002358 |
| 6.9   | 100    | 89.232   | 33963 | 32  | 0.026506 | 0.000758 | 0.003186 |
| 10.1  | 100    | 44.0232  | 13964 | 34  | 0.01422  | 0.001022 | 0.004958 |
| 0.4   | 100    | 87.2985  | 33102 | 28  | 0.067739 | 0.001114 | 0.006077 |
| 31.5  | 100    | 43.4058  | 13725 | 18  | 0.819792 | 0.001945 | 0.009989 |
| 6.6   | 100    | 59.4596  | 21781 | 23  | 0.111136 | 0.001945 | 0.0102   |
| 0.3   | 100    | 130.3965 | 50834 | 40  | 0.003185 | 0.002079 | 0.01175  |
| 16.9  | 100    | 44.5234  | 14143 | 31  | 0.030938 | 0.002315 | 0.01393  |
| 3.2   | 100    | 78.0902  | 29438 | 20  | 0.393408 | 0.002376 | 0.01451  |

|       |        |          |       |    |          |          |          |
|-------|--------|----------|-------|----|----------|----------|----------|
| 1.7   | 100    | 85.1535  | 32172 | 16 | 0.950259 | 0.003178 | 0.02069  |
| 4     | 100    | 76.962   | 28966 | 39 | 0.002388 | 0.003736 | 0.02679  |
| 84.9  | 100    | 24.3584  | 8980  | 28 | 0.026334 | 0.004192 | 0.02992  |
| 0     | 100    | 129.8921 | 50624 | 44 | 0.000995 | 0.004266 | 0.03088  |
| 4.5   | 100    | 96.3099  | 34260 | 19 | 0.53515  | 0.008962 | 0.06759  |
| 7.7   | 100    | 131.8604 | 51425 | 29 | 0.055141 | 0.008997 | 0.06916  |
| 4     | 100    | 69.6589  | 28213 | 17 | 0.9397   | 0.009514 | 0.07367  |
| 17.5  | 100    | 51.0964  | 16683 | 27 | 0.018566 | 0        | 0.001045 |
| 17.4  | 100    | 91.2488  | 34088 | 54 | 0.000137 | 0        | 1.24E-06 |
| 26.7  | 85.136 | 90.7473  | 33899 | 64 | 1.4E-05  | 0        | 5.08E-08 |
| 15    | 100    | 54.1475  | 17829 | 60 | 1.95E-05 | 0        | 0.000214 |
| 39.3  | 100    | 69.0282  | 23795 | 29 | 0.022393 | 0        | 0.001052 |
| 140.6 | 19.91  | 69.538   | 24001 | 46 | 0.000392 | 0        | 9.81E-06 |
| 0.8   | 100    | 104.1773 | 40345 | 71 | 6.24E-07 | 0        | 8.15E-08 |
| 27.7  | 100    | 139.696  | 53752 | 62 | 2.49E-05 | 0        | 2.75E-06 |
| 13.9  | 100    | 105.513  | 39114 | 36 | 0.009862 | 0        | 0.000864 |
| 39.7  | 100    | 137.4512 | 52729 | 21 | 0.317287 | 0        | 4.4E-05  |
| 24.5  | 51.66  | 141.4438 | 54697 | 75 | 2.12E-07 | 0        | 7.24E-13 |
| 43.9  | 87.952 | 58.8135  | 23535 | 86 | 8.36E-08 | 0        | 7.58E-09 |
| 76.7  | 100    | 93.0326  | 33834 | 55 | 4.7E-05  | 0        | 0.001222 |
| 18.2  | 100    | 37.6067  | 14482 | 49 | 0.00038  | 0        | 0.000544 |
| 34.3  | 100    | 100.1786 | 38637 | 48 | 0.000603 | 0.000868 | 0.003434 |
| 7.5   | 100    | 69.1442  | 23843 | 34 | 0.006172 | 0.00121  | 0.006464 |
| 5.8   | 100    | 58.8596  | 23555 | 33 | 0.014163 | 0.001498 | 0.007485 |
| 408.3 | 100    | 48.8316  | 17148 | 40 | 0.003199 | 0.002257 | 0.01258  |
| 7.1   | 100    | 102.4359 | 39251 | 41 | 0.002833 | 0.00382  | 0.02793  |
| 12.5  | 100    | 37.5909  | 14475 | 23 | 0.158899 | 0.008559 | 0.06449  |
| 9.6   | 100    | 69.6524  | 24047 | 23 | 0.089768 | 0.009514 | 0.0727   |
| 18.5  | 100    | 42.9023  | 14813 | 17 | 0.86333  | 0        | 0.00139  |
| 49.7  | 100    | 43.1511  | 14908 | 25 | 0.111888 | 0        | 9.3E-05  |
| 28.6  | 100    | 43.4067  | 15001 | 13 | 2.020192 | 0        | 0.001448 |
| 9.7   | 100    | 60.5745  | 20368 | 49 | 0.000529 | 0        | 2.4E-05  |
| 105.1 | 100    | 23.4092  | 7991  | 36 | 0.009036 | 0        | 0.000221 |
| 5.4   | 100    | 71.1126  | 24256 | 47 | 0.000839 | 0        | 2.82E-05 |
| 18.4  | 100    | 140.1763 | 52108 | 67 | 6.01E-06 | 0        | 4.12E-11 |
| 13.3  | 100    | 118.605  | 46285 | 48 | 0.000128 | 0        | 1.29E-05 |
| 11.4  | 100    | 118.5057 | 46241 | 37 | 0.001546 | 0        | 0.000291 |
| 55.6  | 100    | 90.5661  | 32838 | 59 | 4.96E-05 | 0        | 2.23E-05 |
| 37.9  | 100    | 66.3641  | 24431 | 49 | 0.000565 | 0.000525 | 0.002625 |
| 35.3  | 100    | 65.862   | 24235 | 48 | 0.00064  | 0.000758 | 0.003066 |
| 3.4   | 100    | 101.2367 | 37330 | 27 | 0.086585 | 0.001498 | 0.007682 |
| 3.2   | 100    | 140.4257 | 54538 | 17 | 0.711325 | 0.002376 | 0.01527  |
| 21.2  | 100    | 59.4842  | 21406 | 26 | 0.047045 | 0.002543 | 0.01608  |
| 19.8  | 100    | 102.7374 | 39738 | 7  | 2.803667 | 0.002843 | 0.01914  |
| 43.7  | 100    | 50.8048  | 18434 | 31 | 0.01627  | 0.003674 | 0.02575  |
| 9.8   | 100    | 83.4092  | 30995 | 40 | 0.003093 | 0        | 0.000368 |
| 28.9  | 41.609 | 93.7512  | 38418 | 77 | 6.37E-07 | 0        | 3.03E-06 |
| 9.9   | 33.644 | 140.5812 | 52318 | 69 | 5.27E-06 | 0        | 7.53E-05 |
| 109.3 | 3.133  | 140.4945 | 52266 | 80 | 3.62E-07 | 0        | 9.98E-07 |
| 153.3 | 12.909 | 140.4953 | 52267 | 75 | 1.31E-06 | 0        | 3.3E-07  |
| 35    | 100    | 89.5432  | 34099 | 47 | 0.000518 | 0        | 0.000123 |
| 29    | 38.508 | 97.6104  | 37526 | 69 | 3.2E-06  | 0        | 1.14E-05 |

|       |        |          |       |     |          |          |          |
|-------|--------|----------|-------|-----|----------|----------|----------|
| 31.4  | 9.737  | 97.5819  | 37513 | 65  | 7.15E-06 | 0        | 2.98E-06 |
| 118.4 | 100    | 140.6865 | 54241 | 97  | 8.85E-09 | 0        | 8.15E-12 |
| 33.5  | 100    | 107.2492 | 39830 | 70  | 3.58E-06 | 0        | 4.82E-05 |
| 16.2  | 18.393 | 66.0517  | 24116 | 61  | 3.51E-05 | 0        | 1.17E-05 |
| 24.3  | 18.921 | 66.0169  | 24100 | 64  | 1.87E-05 | 0        | 9.57E-08 |
| 27.8  | 100    | 68.784   | 27834 | 43  | 0.001986 | 0        | 8.18E-05 |
| 377.3 | 100    | 140.7167 | 54257 | 108 | 6.87E-10 | 0        | 1.77E-12 |
| 7.5   | 100    | 68.2802  | 27621 | 35  | 0.01306  | 0        | 0.000836 |
| 40.3  | 25.547 | 42.0747  | 16331 | 57  | 9.2E-05  | 0        | 4.51E-07 |
| 55    | 83.075 | 67.3361  | 24619 | 52  | 0.000181 | 0        | 0.000166 |
| 66.8  | 3.783  | 66.8327  | 24414 | 54  | 9.89E-05 | 0        | 0.000305 |
| 0     | 100    | 91.746   | 35027 | 55  | 7.06E-05 | 0.000141 | 0.001649 |
| 0     | 100    | 91.2124  | 34858 | 49  | 0.000189 | 0.000273 | 0.001834 |
| 0     | 100    | 25.5577  | 7673  | 52  | 0.000144 | 0.000758 | 0.003058 |
| 31.3  | 13.491 | 66.9461  | 24460 | 44  | 0.001021 | 0.000951 | 0.004466 |
| 79    | 94.106 | 93.9773  | 35979 | 44  | 0.001311 | 0.001022 | 0.005031 |
| 26.4  | 100    | 62.4375  | 25122 | 35  | 0.012149 | 0.001022 | 0.005778 |
| 23.1  | 100    | 89.5453  | 34100 | 33  | 0.01242  | 0.001114 | 0.006113 |
| 11.4  | 100    | 40.3959  | 12647 | 24  | 0.191487 | 0.001114 | 0.006221 |
| 17.9  | 100    | 42.1996  | 16383 | 30  | 0.040743 | 0.001308 | 0.007089 |
| 48.9  | 100    | 62.7811  | 22754 | 41  | 0.001543 | 0.001576 | 0.008871 |
| 1.8   | 100    | 128.2126 | 50116 | 49  | 0.000378 | 0.001576 | 0.00884  |
| 192   | 71.783 | 35.6744  | 12694 | 43  | 0.000927 | 0.001758 | 0.009158 |
| 10.6  | 100    | 66.4893  | 24668 | 38  | 0.004722 | 0.001758 | 0.009402 |
| 124.9 | 100    | 36.1772  | 12868 | 44  | 0.000863 | 0.001945 | 0.01018  |
| 7.5   | 100    | 82.9074  | 30807 | 17  | 0.623037 | 0.002079 | 0.01134  |
| 100   | 100    | 93.4751  | 35753 | 40  | 0.003417 | 0.002257 | 0.01291  |
| 9.2   | 100    | 60.032   | 21786 | 40  | 0.002034 | 0.002843 | 0.01859  |
| 22.7  | 100    | 74.3612  | 30248 | 30  | 0.036825 | 0.00337  | 0.02207  |
| 18.7  | 100    | 62.7592  | 22744 | 37  | 0.003563 | 0.003456 | 0.02436  |
| 10.2  | 100    | 41.9454  | 16271 | 25  | 0.143277 | 0.003674 | 0.02644  |
| 15.7  | 100    | 67.3412  | 27200 | 31  | 0.032899 | 0.003967 | 0.02903  |
| 292.3 | 58.639 | 35.9092  | 12773 | 38  | 0.002771 | 0.004344 | 0.03131  |
| 1.5   | 74.735 | 140.5058 | 52273 | 18  | 0.644016 | 0.005114 | 0.0354   |
| 4.8   | 100    | 129.7491 | 50680 | 27  | 0.063007 | 0.00573  | 0.04063  |
| 3.5   | 100    | 61.9898  | 24924 | 19  | 0.49454  | 0.006721 | 0.04906  |
| 6.7   | 100    | 90.0522  | 34326 | 17  | 0.491038 | 0.007423 | 0.05384  |
| 5.9   | 100    | 66.4428  | 24267 | 16  | 0.62254  | 0.007785 | 0.05549  |
| 74.9  | 15.918 | 85.4479  | 31781 | 71  | 3.11E-06 | 0        | 2.12E-05 |
| 84.8  | 24.485 | 85.4187  | 31770 | 55  | 0.000121 | 0        | 0.000767 |
| 4.7   | 100    | 104.942  | 39483 | 34  | 0.0084   | 0        | 0.000745 |
| 10    | 100    | 104.4398 | 39295 | 54  | 8.58E-05 | 0        | 4.4E-06  |
| 8.1   | 100    | 104.4204 | 39288 | 50  | 0.000222 | 0        | 0.000157 |
| 17.4  | 90.503 | 103.9357 | 39114 | 53  | 9.89E-05 | 0        | 1.09E-05 |
| 11.6  | 100    | 103.9166 | 39107 | 61  | 1.59E-05 | 0        | 1.05E-06 |
| 11.2  | 100    | 103.4325 | 38931 | 57  | 4.1E-05  | 0        | 7.31E-07 |
| 1.8   | 100    | 102.9285 | 38744 | 41  | 0.001521 | 0        | 0.000473 |
| 0.6   | 100    | 139.0527 | 51438 | 57  | 8.76E-05 | 0        | 8.4E-07  |
| 3.3   | 100    | 138.549  | 51269 | 62  | 2.6E-05  | 0        | 4.79E-07 |
| 87.7  | 48.204 | 73.9583  | 25841 | 60  | 2.1E-05  | 0        | 0.000317 |
| 27.3  | 100    | 42.1892  | 15079 | 22  | 0.269884 | 0        | 0.000806 |
| 24.7  | 100    | 44.9952  | 16168 | 35  | 0.008172 | 0        | 0.000782 |



|       |        |          |       |    |          |          |          |
|-------|--------|----------|-------|----|----------|----------|----------|
| 119.6 | 46.973 | 54.2303  | 19782 | 43 | 0.001303 | 0        | 5.45E-07 |
| 59.9  | 100    | 53.7599  | 19593 | 25 | 0.082212 | 0        | 0.001559 |
| 89.4  | 17.35  | 53.7248  | 19577 | 36 | 0.006545 | 0        | 4.96E-06 |
| 37.1  | 100    | 53.2213  | 19370 | 30 | 0.028476 | 0        | 0.000531 |
| 37.8  | 100    | 17.5131  | 5542  | 44 | 0.001278 | 0        | 0.000058 |
| 23.8  | 100    | 68.3333  | 23174 | 48 | 0.000344 | 0        | 9.52E-05 |
| 1.8   | 100    | 85.8884  | 30050 | 59 | 3.26E-05 | 0        | 0.000759 |
| 40.6  | 59.62  | 67.535   | 24628 | 53 | 0.000112 | 0        | 0.000597 |
| 29.5  | 98.345 | 67.529   | 24625 | 54 | 0.000104 | 0        | 0.000377 |
| 5.2   | 100    | 67.0259  | 24435 | 41 | 0.001848 | 0        | 0.000905 |
| 14.9  | 83.794 | 135.935  | 53162 | 89 | 5.88E-08 | 0        | 1.77E-10 |
| 10.9  | 100    | 132.522  | 50618 | 37 | 0.009204 | 0        | 0.000363 |
| 1.5   | 100    | 132.973  | 50802 | 48 | 0.000735 | 0        | 0.000686 |
| 64.4  | 100    | 42.3006  | 14466 | 29 | 0.042433 | 0        | 0.000516 |
| 61.8  | 100    | 44.8042  | 15984 | 54 | 0.000157 | 0        | 7.04E-05 |
| 49.6  | 100    | 44.3017  | 15789 | 47 | 0.000694 | 0        | 1.42E-05 |
| 98.5  | 83.114 | 45.3203  | 16185 | 60 | 3.85E-05 | 0        | 9.24E-06 |
| 129.9 | 42.047 | 45.8236  | 16400 | 57 | 6.8E-05  | 0        | 1.7E-05  |
| 24.2  | 100    | 45.987   | 16461 | 64 | 1.55E-05 | 0        | 1.7E-06  |
| 167.1 | 86.011 | 141.1914 | 54550 | 75 | 5.46E-07 | 0        | 1.65E-09 |
| 35.3  | 100    | 43.6511  | 15545 | 25 | 0.102261 | 0        | 0.001418 |
| 85.5  | 21.457 | 46.3364  | 16595 | 63 | 1.66E-05 | 0        | 5.56E-06 |
| 150.1 | 100    | 141.2087 | 54563 | 97 | 3.97E-09 | 0        | 1.85E-09 |
| 65.5  | 8.496  | 40.4657  | 15655 | 52 | 0.000269 | 0        | 2.88E-06 |
| 17.2  | 100    | 40.97    | 15854 | 49 | 0.000436 | 0        | 2.52E-05 |
| 32.4  | 100    | 78.8559  | 29478 | 30 | 0.033377 | 0.000273 | 0.001975 |
| 4.9   | 100    | 103.4148 | 38923 | 40 | 0.002251 | 0.000273 | 0.001928 |
| 0.9   | 100    | 135.6465 | 50091 | 37 | 0.009299 | 0.000273 | 0.001952 |
| 6.4   | 100    | 133.0245 | 50824 | 38 | 0.007128 | 0.000525 | 0.002159 |
| 11.4  | 100    | 53.2529  | 19383 | 27 | 0.052316 | 0.000951 | 0.0038   |
| 98.4  | 100    | 90.1847  | 32673 | 32 | 0.016232 | 0.001022 | 0.005688 |
| 6.5   | 100    | 46.4925  | 16656 | 38 | 0.006388 | 0.001022 | 0.005226 |
| 6.3   | 100    | 40.4143  | 15633 | 34 | 0.016289 | 0.001498 | 0.007632 |
| 13.7  | 100    | 58.3899  | 19369 | 55 | 0.000109 | 0.001498 | 0.00768  |
| 11.2  | 100    | 35.0762  | 10792 | 48 | 0.000644 | 0.001498 | 0.00781  |
| 24.1  | 100    | 74.0082  | 25861 | 40 | 0.002281 | 0.001758 | 0.009012 |
| 12.6  | 100    | 53.752   | 19589 | 36 | 0.007    | 0.002012 | 0.01088  |
| 27.3  | 100    | 54.263   | 19795 | 25 | 0.088526 | 0.002012 | 0.01114  |
| 19.8  | 100    | 73.4546  | 25618 | 40 | 0.002578 | 0.002012 | 0.01083  |
| 6.9   | 100    | 45.4854  | 16255 | 38 | 0.005349 | 0.002012 | 0.0104   |
| 27.5  | 100    | 73.5072  | 25640 | 36 | 0.006197 | 0.002079 | 0.01135  |
| 15.7  | 100    | 17.4704  | 4912  | 20 | 0.313475 | 0.002257 | 0.01288  |
| 18.2  | 100    | 60.2675  | 20241 | 16 | 0.781167 | 0.002315 | 0.01353  |
| 0     | 100    | 132.3902 | 48812 | 26 | 0.107002 | 0.002376 | 0.01481  |
| 27.4  | 100    | 89.6756  | 32447 | 33 | 0.012847 | 0.00337  | 0.02355  |
| 12.4  | 100    | 39.8239  | 14041 | 31 | 0.018064 | 0.00337  | 0.02232  |
| 6.5   | 100    | 68.2284  | 23132 | 32 | 0.014758 | 0.003736 | 0.02674  |
| 14.8  | 100    | 62.2774  | 22502 | 42 | 0.001299 | 0.004124 | 0.02988  |
| 10.4  | 100    | 36.6655  | 14089 | 21 | 0.312134 | 0.004192 | 0.03052  |
| 23.5  | 34.222 | 88.5065  | 33639 | 51 | 0.000304 | 0.004643 | 0.03352  |
| 0.9   | 100    | 135.6732 | 53057 | 10 | 3.832161 | 0.005687 | 0.03934  |
| 1     | 100    | 132.4699 | 50596 | 21 | 0.338054 | 0.009514 | 0.07475  |

|       |        |          |       |     |          |          |          |
|-------|--------|----------|-------|-----|----------|----------|----------|
| 25.8  | 100    | 71.7732  | 26590 | 37  | 0.007512 | 0        | 0.001256 |
| 1.7   | 100    | 41.1617  | 12924 | 58  | 6.53E-05 | 0        | 0.001093 |
| 18.8  | 100    | 69.453   | 23964 | 38  | 0.001885 | 0        | 0.00038  |
| 30.3  | 100    | 68.8945  | 23740 | 26  | 0.027292 | 0        | 0.000813 |
| 11    | 100    | 75.91    | 26159 | 50  | 0.000331 | 0        | 0.00066  |
| 59.7  | 24.029 | 82.5673  | 28752 | 66  | 5.72E-06 | 0        | 6.42E-05 |
| 7.7   | 100    | 101.3962 | 38621 | 48  | 0.000567 | 0        | 0.000866 |
| 4.1   | 100    | 140.7393 | 52647 | 99  | 4.58E-09 | 0        | 1.31E-11 |
| 6.7   | 100    | 140.7415 | 52648 | 72  | 2.34E-06 | 0        | 2.04E-07 |
| 12.8  | 100    | 142.6867 | 49649 | 88  | 6.12E-08 | 0        | 2.46E-10 |
| 31    | 74.751 | 82.7526  | 29614 | 45  | 0.000303 | 0        | 3.7E-05  |
| 13.6  | 44.195 | 142.6845 | 49648 | 101 | 3.3E-09  | 0        | 1.44E-10 |
| 31.7  | 72.683 | 82.7185  | 29599 | 29  | 0.010851 | 0        | 0.000388 |
| 76.1  | 100    | 53.6865  | 21359 | 49  | 0.00051  | 0        | 0.001356 |
| 46    | 100    | 141.2897 | 54612 | 55  | 0.000144 | 0        | 2.45E-07 |
| 22.2  | 100    | 141.2919 | 54613 | 21  | 0.378657 | 0        | 6.34E-05 |
| 5.6   | 100    | 140.7002 | 50323 | 60  | 4.06E-05 | 0        | 2.24E-06 |
| 2.5   | 100    | 133.4412 | 51005 | 33  | 0.021403 | 0.000141 | 0.001689 |
| 40.5  | 100    | 45.0903  | 16203 | 29  | 0.048543 | 0.000273 | 0.002043 |
| 34.8  | 100    | 42.9885  | 15213 | 27  | 0.015208 | 0.000525 | 0.002515 |
| 103.8 | 27.461 | 82.5734  | 28755 | 38  | 0.003734 | 0.000868 | 0.003534 |
| 107.8 | 3.22   | 44.4921  | 15966 | 29  | 0.051258 | 0.001022 | 0.004747 |
| 14.4  | 100    | 80.1689  | 27814 | 48  | 0.000473 | 0.001022 | 0.005595 |
| 25.3  | 100    | 82.2423  | 29402 | 22  | 0.050176 | 0.001022 | 0.005519 |
| 95.6  | 100    | 41.5383  | 14346 | 19  | 0.560735 | 0.001022 | 0.004838 |
| 28.9  | 100    | 43.5981  | 15074 | 30  | 0.043765 | 0.001114 | 0.006038 |
| 33.1  | 100    | 50.0151  | 19759 | 45  | 0.001352 | 0.001308 | 0.007129 |
| 47.3  | 100    | 18.0397  | 5426  | 17  | 0.640395 | 0.001677 | 0.008913 |
| 26.1  | 100    | 43.9908  | 15768 | 28  | 0.05474  | 0.001758 | 0.009068 |
| 18.1  | 100    | 82.0668  | 28552 | 40  | 0.00273  | 0.002012 | 0.01066  |
| 3.6   | 100    | 99.6521  | 35562 | 30  | 0.038748 | 0.002079 | 0.01198  |
| 10.6  | 100    | 39.4447  | 13374 | 24  | 0.1388   | 0.002543 | 0.01599  |
| 24.4  | 100    | 40.0085  | 14260 | 33  | 0.025014 | 0.002777 | 0.01691  |
| 23.3  | 100    | 82.0647  | 28551 | 26  | 0.059215 | 0.003254 | 0.02131  |
| 29.8  | 100    | 61.7047  | 20596 | 26  | 0.090065 | 0.004344 | 0.03127  |
| 6.5   | 100    | 78.3965  | 29071 | 35  | 0.011893 | 0        | 0.001276 |
| 14.5  | 100    | 78.2752  | 29021 | 46  | 0.001033 | 0        | 0.000712 |
| 63.4  | 100    | 77.8901  | 28861 | 38  | 0.005456 | 0        | 0.000353 |
| 0.9   | 100    | 140.1032 | 55013 | 74  | 1.68E-06 | 0        | 1.03E-07 |
| 10.1  | 100    | 98.1903  | 37791 | 72  | 1.56E-06 | 0        | 5.89E-06 |
| 59.5  | 66.345 | 99.7408  | 38459 | 84  | 1.48E-07 | 0        | 1.31E-08 |
| 8.1   | 100    | 99.7745  | 38474 | 46  | 0.000837 | 0        | 0.001192 |
| 16.9  | 81.538 | 100.6117 | 38822 | 69  | 2.77E-06 | 0        | 4.61E-07 |
| 4.5   | 100    | 140.5286 | 54154 | 63  | 1.88E-05 | 0        | 1.45E-05 |
| 244.5 | 68.6   | 140.5019 | 54142 | 100 | 3.49E-09 | 0        | 1.58E-10 |
| 15.2  | 100    | 120.8313 | 45607 | 48  | 0.000578 | 0        | 0.000854 |
| 10.9  | 100    | 122.8992 | 46523 | 51  | 0.00011  | 0        | 0.000117 |
| 42.6  | 65.034 | 140.9276 | 54389 | 56  | 8.19E-06 | 0        | 4.76E-11 |
| 16.2  | 100    | 121.3309 | 45831 | 48  | 0.000631 | 0.000141 | 0.001584 |
| 129.4 | 82.855 | 23.5461  | 8625  | 22  | 0.263063 | 0.001022 | 0.005118 |
| 120.1 | 14.223 | 23.6849  | 8688  | 37  | 0.002524 | 0.00121  | 0.006835 |
| 68.6  | 100    | 82.1362  | 29361 | 50  | 4.43E-05 | 0.001498 | 0.007855 |

|       |        |          |       |     |          |          |          |
|-------|--------|----------|-------|-----|----------|----------|----------|
| 5.2   | 100    | 33.4981  | 10246 | 50  | 0.000246 | 0.002315 | 0.01381  |
| 101.4 | 100    | 15.5312  | 4411  | 20  | 0.021341 | 0.002315 | 0.01342  |
| 139.6 | 100    | 81.6367  | 29153 | 42  | 0.000279 | 0.002376 | 0.01436  |
| 190.8 | 100    | 24.8339  | 8542  | 31  | 0.008466 | 0.002543 | 0.01622  |
| 2     | 100    | 107.4725 | 39920 | 15  | 0.226622 | 0.004124 | 0.0294   |
| 9.3   | 100    | 24.8619  | 8553  | 32  | 0.008    | 0.004803 | 0.03412  |
| 1     | 100    | 117.9073 | 48417 | 42  | 0.001302 | 0        | 0.00026  |
| 148.6 | 34.134 | 16.4499  | 5024  | 31  | 0.026203 | 0        | 0.001054 |
| 26.5  | 100    | 56.997   | 18831 | 41  | 0.001574 | 0        | 0.000789 |
| 0.8   | 100    | 130.7131 | 48200 | 50  | 0.000435 | 0        | 0.000154 |
| 8.8   | 100    | 130.2357 | 48008 | 59  | 5.73E-05 | 0        | 2.29E-05 |
| 1.4   | 100    | 119.6006 | 46273 | 44  | 0.000952 | 0        | 0.000455 |
| 9.9   | 100    | 140.7117 | 52392 | 80  | 1.51E-07 | 0        | 2.98E-08 |
| 17.4  | 15.885 | 140.6966 | 52382 | 101 | 1.18E-09 | 0        | 1.6E-10  |
| 60.9  | 100    | 31.6285  | 10686 | 48  | 0.000408 | 0        | 0.001329 |
| 39.2  | 100    | 137.3711 | 52691 | 48  | 0.000422 | 0        | 5.19E-06 |
| 49.1  | 73.31  | 67.5843  | 24748 | 62  | 2.75E-05 | 0        | 3.98E-07 |
| 66.1  | 100    | 16.4605  | 5029  | 39  | 0.003937 | 0.000273 | 0.002079 |
| 10.6  | 100    | 65.4267  | 24231 | 35  | 0.009868 | 0.000525 | 0.002354 |
| 131.5 | 18.969 | 20.5225  | 7321  | 45  | 0.00054  | 0.001022 | 0.005226 |
| 35.1  | 100    | 56.4959  | 18637 | 28  | 0.02703  | 0.001022 | 0.004774 |
| 9.3   | 100    | 81.0363  | 28168 | 38  | 0.003167 | 0.001022 | 0.0053   |
| 15    | 100    | 73.1667  | 27111 | 33  | 0.009652 | 0.00121  | 0.00676  |
| 0     | 100    | 117.9462 | 48433 | 28  | 0.029762 | 0.00141  | 0.007228 |
| 17.1  | 100    | 81.0003  | 28155 | 34  | 0.007648 | 0.002079 | 0.01146  |
| 53    | 100    | 39.0321  | 13205 | 14  | 1.412267 | 0.002376 | 0.01512  |
| 0.5   | 100    | 119.0979 | 46055 | 25  | 0.074204 | 0.002843 | 0.01848  |
| 19.3  | 100    | 19.6589  | 6921  | 32  | 0.025356 | 0.00362  | 0.02492  |
| 11.5  | 100    | 74.6597  | 27678 | 59  | 2.24E-05 | 0        | 8.9E-08  |
| 11.4  | 100    | 46.5541  | 14902 | 43  | 0.001714 | 0        | 0.000383 |
| 5.9   | 100    | 86.5774  | 35359 | 27  | 0.052574 | 0        | 0.000162 |
| 28.3  | 100    | 140.4135 | 52224 | 88  | 1.38E-08 | 0        | 2.65E-10 |
| 97.6  | 100    | 13.5307  | 3837  | 19  | 0.176493 | 0        | 0.000661 |
| 63.8  | 58.936 | 100.551  | 37050 | 62  | 2.58E-05 | 0        | 6.27E-06 |
| 44.8  | 100    | 42.0486  | 14818 | 29  | 0.039333 | 0        | 0.000921 |
| 48    | 100    | 41.5457  | 14618 | 30  | 0.027641 | 0        | 0.000668 |
| 64.8  | 100    | 70.5136  | 25973 | 58  | 7.69E-05 | 0        | 1.21E-05 |
| 32.5  | 94.935 | 64.7717  | 26102 | 61  | 2.4E-05  | 0        | 4.16E-05 |
| 29.5  | 100    | 89.5122  | 34084 | 50  | 0.000408 | 0.000525 | 0.002616 |
| 1.8   | 100    | 75.1611  | 27868 | 26  | 0.039835 | 0.000525 | 0.002183 |
| 4.1   | 100    | 87.0847  | 35579 | 29  | 0.031897 | 0.000951 | 0.003693 |
| 7.5   | 100    | 130.1238 | 49608 | 32  | 0.011054 | 0.001022 | 0.004684 |
| 15    | 100    | 12.4938  | 3374  | 21  | 0.075303 | 0.002012 | 0.01027  |
| 13.8  | 100    | 82.8176  | 30797 | 33  | 0.01464  | 0.002079 | 0.0122   |
| 8.7   | 100    | 12.2447  | 3350  | 25  | 0.025989 | 0.002315 | 0.01353  |
| 13.2  | 100    | 97.0228  | 36347 | 33  | 0.020733 | 0.002376 | 0.01507  |
| 26.5  | 100    | 64.8302  | 26126 | 18  | 0.405656 | 0.005792 | 0.04247  |
| 7.8   | 100    | 100.6257 | 37081 | 19  | 0.467761 | 0.009514 | 0.07282  |
| 9.3   | 100    | 49.8933  | 16124 | 13  | 1.697678 | 0.009858 | 0.08125  |
| 9.1   | 100    | 72.5447  | 26879 | 45  | 0.001064 | 0        | 0.001327 |
| 8.7   | 100    | 99.792   | 40995 | 44  | 0.000763 | 0        | 2.69E-05 |
| 9.6   | 100    | 68.4082  | 23531 | 39  | 0.004736 | 0        | 0.000296 |

|       |        |          |       |    |          |          |          |
|-------|--------|----------|-------|----|----------|----------|----------|
| 18.9  | 58.173 | 140.473  | 52255 | 58 | 3.14E-05 | 0        | 5.31E-05 |
| 132.4 | 79.427 | 140.4693 | 52253 | 93 | 9.6E-09  | 0        | 4.95E-10 |
| 4     | 100    | 106.6469 | 41349 | 38 | 0.001634 | 0        | 0.000784 |
| 58.2  | 100    | 17.733   | 5985  | 57 | 6.34E-05 | 0        | 0.000184 |
| 33    | 42.157 | 42.1173  | 14849 | 62 | 1.75E-05 | 0        | 5.04E-05 |
| 6     | 100    | 68.9325  | 27899 | 40 | 0.00092  | 0        | 0.000117 |
| 89.8  | 100    | 49.3419  | 19469 | 28 | 0.029228 | 0        | 0.000124 |
| 69.8  | 100    | 25.83    | 9621  | 47 | 0.000576 | 0        | 0.000612 |
| 46    | 100    | 28.0806  | 9753  | 36 | 0.008018 | 0.000141 | 0.001565 |
| 21.3  | 100    | 17.7778  | 5369  | 42 | 0.001643 | 0.000141 | 0.001762 |
| 35.6  | 100    | 17.8308  | 5696  | 42 | 0.001903 | 0.000273 | 0.001923 |
| 95.3  | 100    | 48.2512  | 17330 | 26 | 0.024537 | 0.000273 | 0.002032 |
| 1.1   | 100    | 106.5853 | 40826 | 28 | 0.030009 | 0.000273 | 0.002028 |
| 0.5   | 100    | 113.2772 | 46515 | 25 | 0.042308 | 0.000758 | 0.003042 |
| 27    | 100    | 36.0843  | 12602 | 41 | 0.001142 | 0.00121  | 0.0066   |
| 4     | 100    | 84.4661  | 31463 | 18 | 0.588449 | 0.002543 | 0.01615  |
| 21.9  | 100    | 47.3507  | 16505 | 34 | 0.015111 | 0.003254 | 0.02113  |
| 35    | 100    | 41.7372  | 14700 | 26 | 0.070529 | 0.004266 | 0.03101  |
| 23.8  | 100    | 56.5201  | 18757 | 48 | 0.000703 | 0        | 0.000174 |
| 84.2  | 32.787 | 57.6069  | 19205 | 26 | 0.091457 | 0        | 7.45E-05 |
| 17.5  | 100    | 57.6911  | 19241 | 35 | 0.009917 | 0        | 2E-06    |
| 44.5  | 100    | 57.0555  | 18984 | 18 | 0.489585 | 0        | 0.000741 |
| 37.9  | 100    | 31.5318  | 10591 | 44 | 0.00162  | 0        | 2.39E-05 |
| 60    | 22.68  | 31.0301  | 10407 | 59 | 5.03E-05 | 0        | 9.06E-06 |
| 50.4  | 95.093 | 31.0202  | 10403 | 58 | 5.89E-05 | 0        | 4.04E-05 |
| 101.1 | 9.017  | 30.5832  | 10242 | 55 | 0.00011  | 0        | 1.44E-05 |
| 0     | 100    | 30.2448  | 10111 | 62 | 1.79E-05 | 0        | 0.000772 |
| 14.1  | 100    | 32.0397  | 10780 | 53 | 0.000201 | 0        | 1.61E-05 |
| 15.9  | 100    | 31.1378  | 9464  | 53 | 0.000178 | 0        | 0.000251 |
| 45.5  | 68.953 | 31.2536  | 9499  | 59 | 4.7E-05  | 0        | 4.46E-06 |
| 29.1  | 100    | 31.1204  | 9458  | 39 | 0.004641 | 0        | 5.98E-05 |
| 0     | 100    | 30.7376  | 9334  | 53 | 0.000125 | 0        | 0.000542 |
| 30.9  | 100    | 34.6165  | 11738 | 35 | 0.012884 | 0        | 0.000102 |
| 19    | 100    | 34.0651  | 11532 | 48 | 0.000636 | 0        | 1.39E-05 |
| 15.1  | 100    | 33.0506  | 11158 | 43 | 0.001799 | 0        | 5.13E-05 |
| 26.6  | 100    | 32.5473  | 10975 | 38 | 0.006688 | 0        | 0.000161 |
| 97.3  | 56.1   | 58.1103  | 19410 | 25 | 0.108197 | 0        | 0.000116 |
| 14.3  | 100    | 58.1928  | 19444 | 35 | 0.010962 | 0        | 2.08E-05 |
| 61.9  | 100    | 58.6139  | 19599 | 28 | 0.050029 | 0        | 5.52E-05 |
| 29.3  | 100    | 30.6397  | 10769 | 59 | 3.5E-05  | 0        | 0.00034  |
| 5.2   | 100    | 30.6303  | 10765 | 46 | 0.000582 | 0        | 0.000959 |
| 14.5  | 100    | 60.479   | 20129 | 18 | 0.489493 | 0        | 0.000758 |
| 61.6  | 95.323 | 58.9319  | 19569 | 69 | 6.32E-06 | 0        | 1.04E-06 |
| 100.5 | 1.487  | 58.4219  | 19381 | 69 | 5.84E-06 | 0        | 3.55E-05 |
| 13.8  | 100    | 57.9929  | 19221 | 55 | 0.000148 | 0        | 0.000012 |
| 56.8  | 38.172 | 58.4942  | 19411 | 58 | 6.91E-05 | 0        | 1.09E-05 |
| 39.2  | 100    | 65.9386  | 22238 | 40 | 0.004275 | 0        | 0.001051 |
| 16.6  | 100    | 65.7021  | 22151 | 35 | 0.009732 | 0        | 1.67E-05 |
| 66.7  | 4.417  | 62.6785  | 20971 | 28 | 0.056461 | 0        | 0.000111 |
| 33.2  | 21.698 | 62.6348  | 20952 | 37 | 0.006469 | 0        | 3.46E-06 |
| 60.4  | 7.528  | 62.1742  | 20776 | 26 | 0.076117 | 0        | 4.17E-05 |
| 20.6  | 100    | 61.6739  | 20585 | 23 | 0.147645 | 0        | 0.000233 |

|       |        |          |       |    |          |   |          |
|-------|--------|----------|-------|----|----------|---|----------|
| 17.8  | 100    | 61.168   | 20393 | 22 | 0.215716 | 0 | 0.000163 |
| 49.2  | 46.765 | 62.1318  | 20759 | 32 | 0.022293 | 0 | 2.91E-06 |
| 33.9  | 36.084 | 63.1358  | 21150 | 30 | 0.03151  | 0 | 5.09E-06 |
| 38.4  | 100    | 64.695   | 21770 | 25 | 0.114873 | 0 | 4.29E-05 |
| 41    | 35.671 | 64.1922  | 21569 | 27 | 0.069482 | 0 | 6.81E-05 |
| 47.8  | 100    | 64.1433  | 21548 | 32 | 0.019693 | 0 | 2.03E-06 |
| 64.6  | 14.388 | 63.6869  | 21370 | 25 | 0.109359 | 0 | 0.00012  |
| 35.9  | 68.153 | 63.6382  | 21351 | 33 | 0.018512 | 0 | 3.66E-06 |
| 73.6  | 8.399  | 63.1814  | 21170 | 28 | 0.048734 | 0 | 6.9E-05  |
| 20.9  | 100    | 65.201   | 21956 | 21 | 0.258951 | 0 | 0.000153 |
| 24    | 54.378 | 141.1302 | 55562 | 61 | 2.65E-05 | 0 | 6.87E-06 |
| 14    | 7.024  | 141.1241 | 55556 | 56 | 9.65E-05 | 0 | 8.38E-09 |
| 11.7  | 100    | 31.7849  | 9731  | 48 | 0.0006   | 0 | 6.58E-05 |
| 13.6  | 100    | 50.6277  | 17853 | 76 | 6.88E-07 | 0 | 0.00123  |
| 28.1  | 11.854 | 65.1755  | 23683 | 97 | 8.25E-09 | 0 | 2.35E-09 |
| 58.1  | 3.863  | 65.1658  | 23679 | 48 | 0.000635 | 0 | 0.000312 |
| 26.6  | 100    | 64.6619  | 23471 | 35 | 0.012387 | 0 | 0.001194 |
| 25.6  | 100    | 66.4289  | 24185 | 54 | 6.95E-05 | 0 | 0.001058 |
| 12.6  | 100    | 67.9385  | 24788 | 56 | 4.33E-05 | 0 | 0.000735 |
| 28.8  | 100    | 67.4353  | 24593 | 56 | 3.99E-05 | 0 | 0.000366 |
| 129.5 | 2.915  | 66.9314  | 24401 | 62 | 1.31E-05 | 0 | 0.001533 |
| 33.4  | 22.8   | 61.0868  | 22026 | 32 | 0.018759 | 0 | 3.73E-05 |
| 28.9  | 100    | 61.044   | 22006 | 35 | 0.009939 | 0 | 6.33E-06 |
| 33.8  | 15.988 | 60.574   | 21810 | 28 | 0.055446 | 0 | 5.49E-05 |
| 38.4  | 17.449 | 60.0715  | 21590 | 35 | 0.011478 | 0 | 1.82E-05 |
| 41.9  | 80.733 | 60.0269  | 21572 | 30 | 0.034106 | 0 | 3.29E-06 |
| 35    | 100    | 59.5666  | 21385 | 25 | 0.111899 | 0 | 0.000329 |
| 30.6  | 84.8   | 60.5299  | 21790 | 37 | 0.006112 | 0 | 1.52E-06 |
| 26.6  | 75.246 | 61.5904  | 22224 | 29 | 0.045243 | 0 | 6.08E-05 |
| 8     | 100    | 62.5987  | 22643 | 21 | 0.236523 | 0 | 0.001523 |
| 22.2  | 100    | 62.0957  | 22427 | 25 | 0.115403 | 0 | 0.00023  |
| 136.1 | 4.393  | 140.4294 | 55172 | 49 | 0.000458 | 0 | 3.97E-05 |
| 2     | 52.383 | 140.3752 | 55144 | 49 | 0.000473 | 0 | 0.000322 |
| 18.2  | 100    | 139.2361 | 53539 | 52 | 0.000257 | 0 | 3.25E-06 |
| 0     | 100    | 101.9142 | 37627 | 63 | 2.25E-05 | 0 | 1.48E-05 |
| 11.1  | 6.633  | 105.127  | 38953 | 83 | 2.09E-07 | 0 | 2.25E-11 |
| 16.2  | 24.565 | 105.185  | 38978 | 96 | 9.74E-09 | 0 | 4.15E-12 |
| 2.7   | 100    | 105.6283 | 39166 | 61 | 3.14E-05 | 0 | 9.93E-08 |
| 2.4   | 100    | 105.6865 | 39189 | 53 | 0.0002   | 0 | 5.34E-06 |
| 109.5 | 71.178 | 138.224  | 53083 | 86 | 1.02E-07 | 0 | 1.11E-08 |
| 43.4  | 100    | 138.3708 | 53148 | 48 | 0.000596 | 0 | 9.87E-07 |
| 25.5  | 8.359  | 137.8665 | 52921 | 63 | 1.94E-05 | 0 | 1.26E-07 |
| 205.1 | 54.98  | 141.2557 | 54593 | 76 | 8.3E-07  | 0 | 2.12E-09 |
| 31.1  | 100    | 51.3492  | 20347 | 17 | 0.819106 | 0 | 0.000429 |
| 261.8 | 22.895 | 141.2732 | 54603 | 88 | 3.88E-08 | 0 | 1.71E-10 |
| 11.3  | 100    | 141.2792 | 54607 | 75 | 8.25E-07 | 0 | 1.93E-07 |
| 12.9  | 100    | 92.8452  | 33752 | 73 | 1.89E-06 | 0 | 4.04E-11 |
| 31.7  | 39.448 | 92.8064  | 33733 | 55 | 0.000112 | 0 | 7.22E-08 |
| 18.1  | 100    | 96.2359  | 35180 | 52 | 0.000254 | 0 | 4.05E-07 |
| 40.5  | 71.723 | 140.9591 | 54407 | 62 | 1.71E-05 | 0 | 2.06E-06 |
| 1.8   | 100    | 92.3347  | 33539 | 54 | 0.000165 | 0 | 8.2E-06  |
| 23    | 45.617 | 92.2968  | 33524 | 59 | 4.82E-05 | 0 | 2.69E-08 |

|       |        |          |       |    |          |          |          |
|-------|--------|----------|-------|----|----------|----------|----------|
| 7.4   | 100    | 106.1982 | 39397 | 24 | 0.161283 | 0.000141 | 0.001723 |
| 114.3 | 58.943 | 30.5266  | 10218 | 28 | 0.063583 | 0.000141 | 0.001675 |
| 12.4  | 100    | 33.559   | 11344 | 32 | 0.023903 | 0.000141 | 0.001755 |
| 3.7   | 100    | 30.7834  | 9349  | 43 | 0.001269 | 0.000407 | 0.002135 |
| 0.5   | 100    | 107.6559 | 39992 | 28 | 0.071576 | 0.000525 | 0.002412 |
| 9.8   | 100    | 61.5461  | 22207 | 28 | 0.047448 | 0.00065  | 0.002658 |
| 38.8  | 100    | 59.1216  | 19787 | 16 | 0.818245 | 0.00065  | 0.002717 |
| 11.7  | 100    | 64.645   | 21751 | 26 | 0.086628 | 0.00065  | 0.002678 |
| 15.6  | 100    | 66.3636  | 22403 | 12 | 1.841695 | 0.000868 | 0.003446 |
| 30.8  | 100    | 64.7581  | 21791 | 45 | 0.000508 | 0.000868 | 0.003308 |
| 10.6  | 100    | 137.3616 | 52687 | 32 | 0.028366 | 0.000868 | 0.003488 |
| 31.8  | 23.717 | 66.981   | 24420 | 49 | 0.000213 | 0.000868 | 0.003324 |
| 21.6  | 100    | 59.4358  | 19751 | 43 | 0.002544 | 0.000951 | 0.003736 |
| 57.7  | 100    | 51.5048  | 18706 | 49 | 0.000401 | 0.001022 | 0.005553 |
| 28.3  | 100    | 59.9383  | 19927 | 38 | 0.008017 | 0.001022 | 0.004804 |
| 9.8   | 100    | 66.4785  | 24206 | 36 | 0.004492 | 0.001022 | 0.00527  |
| 4.4   | 100    | 53.8444  | 19125 | 31 | 0.034737 | 0.001022 | 0.005325 |
| 24.8  | 100    | 73.8759  | 25805 | 26 | 0.091846 | 0.001114 | 0.006317 |
| 24.9  | 100    | 34.9731  | 10755 | 20 | 0.378785 | 0.001114 | 0.006022 |
| 172.6 | 3.552  | 66.6678  | 24287 | 51 | 0.000151 | 0.001114 | 0.006055 |
| 0     | 100    | 106.1367 | 39369 | 24 | 0.156109 | 0.001308 | 0.007163 |
| 13.2  | 100    | 60.9431  | 20311 | 36 | 0.010389 | 0.001576 | 0.008629 |
| 15    | 100    | 50.6236  | 18364 | 49 | 0.000197 | 0.001758 | 0.009441 |
| 12.8  | 100    | 56.8529  | 18896 | 34 | 0.015863 | 0.002012 | 0.01125  |
| 7.9   | 100    | 66.3895  | 24254 | 45 | 0.00042  | 0.002012 | 0.01075  |
| 15.4  | 100    | 59.06    | 21186 | 13 | 1.347838 | 0.002079 | 0.01219  |
| 51.2  | 67.321 | 49.6608  | 17470 | 56 | 4.7E-05  | 0.002376 | 0.01441  |
| 9.8   | 100    | 63.5991  | 23046 | 24 | 0.178641 | 0.002376 | 0.01518  |
| 24.3  | 100    | 38.054   | 13053 | 22 | 0.261252 | 0.002376 | 0.01489  |
| 12.7  | 100    | 54.3557  | 19330 | 27 | 0.090348 | 0.002543 | 0.01565  |
| 24.2  | 100    | 84.9438  | 30495 | 14 | 1.090532 | 0.002777 | 0.01746  |
| 22.9  | 100    | 50.1651  | 17668 | 49 | 0.000227 | 0.002777 | 0.01759  |
| 1.7   | 100    | 53.3399  | 18919 | 23 | 0.206463 | 0.002777 | 0.01691  |
| 18.8  | 100    | 68.6194  | 25061 | 37 | 0.003531 | 0.00337  | 0.02402  |
| 12    | 100    | 62.8139  | 22731 | 27 | 0.087089 | 0.00337  | 0.02243  |
| 179.2 | 5.758  | 66.9111  | 24392 | 39 | 0.002142 | 0.004049 | 0.02921  |
| 14.3  | 100    | 27.2984  | 8230  | 36 | 0.005339 | 0.004643 | 0.03305  |
| 10.1  | 100    | 31.8727  | 9760  | 29 | 0.04357  | 0.005404 | 0.03765  |
| 7     | 100    | 57.1796  | 20434 | 32 | 0.029688 | 0.006299 | 0.04623  |
| 8.8   | 100    | 53.5611  | 19012 | 16 | 1.141499 | 0.007836 | 0.05692  |
| 9.5   | 100    | 53.0562  | 18809 | 14 | 1.511734 | 0.007836 | 0.05601  |
| 13.9  | 100    | 60.4395  | 20114 | 23 | 0.223654 | 0.008683 | 0.06604  |
| 9.7   | 100    | 63.7049  | 21376 | 26 | 0.113005 | 0.008746 | 0.06621  |
| 8.7   | 100    | 52.8347  | 18722 | 19 | 0.550004 | 0.008997 | 0.06791  |
| 8.3   | 100    | 31.522   | 10587 | 28 | 0.064041 | 0.008997 | 0.06796  |
| 70.1  | 100    | 49.7447  | 16164 | 42 | 0.000963 | 0.009764 | 0.07818  |
| 16.3  | 100    | 80.1851  | 29756 | 34 | 0.010986 | 0        | 2.39E-05 |
| 10.3  | 100    | 80.2304  | 29776 | 37 | 0.0066   | 0        | 0.000276 |
| 14.2  | 100    | 78.3852  | 31924 | 28 | 0.044284 | 0        | 0.000136 |
| 38.1  | 42.479 | 77.8811  | 31706 | 58 | 4.45E-05 | 0        | 3.11E-10 |
| 23.2  | 98.941 | 77.7485  | 31650 | 55 | 8.91E-05 | 0        | 5E-08    |
| 63.9  | 100    | 16.5058  | 5051  | 43 | 0.001956 | 0        | 2.07E-05 |

|       |        |          |       |    |          |   |          |
|-------|--------|----------|-------|----|----------|---|----------|
| 35.7  | 100    | 53.4067  | 17463 | 26 | 0.107956 | 0 | 0.00152  |
| 8.1   | 100    | 102.0551 | 36536 | 21 | 0.260472 | 0 | 0.000251 |
| 9.5   | 100    | 102.0407 | 36530 | 32 | 0.020614 | 0 | 9.93E-05 |
| 7.2   | 100    | 101.5494 | 36317 | 29 | 0.042223 | 0 | 0.000249 |
| 7.9   | 100    | 20.0112  | 5886  | 43 | 0.0018   | 0 | 0.001148 |
| 50.4  | 100    | 51.9766  | 18387 | 32 | 0.029544 | 0 | 0.000543 |
| 103.1 | 28.307 | 51.4662  | 18181 | 32 | 0.028704 | 0 | 0.000387 |
| 37.9  | 84.774 | 51.2191  | 18077 | 63 | 2.33E-05 | 0 | 5.66E-06 |
| 113.6 | 3.999  | 50.9634  | 17985 | 38 | 0.007095 | 0 | 0.000229 |
| 58.3  | 100    | 50.4579  | 17782 | 21 | 0.342353 | 0 | 0.000886 |
| 38.4  | 5.205  | 100.1783 | 38086 | 31 | 0.022419 | 0 | 2.72E-05 |
| 53.2  | 12.005 | 100.1578 | 38076 | 47 | 0.00061  | 0 | 2.6E-07  |
| 47.8  | 69.187 | 100.1191 | 38060 | 19 | 0.486397 | 0 | 0.000393 |
| 23    | 41.934 | 100.0616 | 38035 | 37 | 0.008843 | 0 | 2.75E-05 |
| 3.1   | 100    | 100.5675 | 38268 | 41 | 0.003477 | 0 | 0.000775 |
| 3.1   | 100    | 100.5675 | 38268 | 41 | 0.003477 | 0 | 0.000483 |
| 18    | 100    | 101.171  | 38525 | 44 | 0.00139  | 0 | 1.21E-06 |
| 33.2  | 18.953 | 100.6813 | 38320 | 29 | 0.043807 | 0 | 1.56E-05 |
| 49    | 25.89  | 100.6614 | 38311 | 43 | 0.001683 | 0 | 1.09E-06 |
| 11.9  | 100    | 109.7545 | 42608 | 36 | 0.010714 | 0 | 7.93E-06 |
| 15.5  | 100    | 109.5407 | 42524 | 49 | 0.000515 | 0 | 4.35E-07 |
| 10.7  | 100    | 110.0472 | 42727 | 28 | 0.056589 | 0 | 5.74E-05 |
| 13.3  | 100    | 110.3982 | 42867 | 75 | 1.33E-07 | 0 | 2.5E-08  |
| 3     | 100    | 110.2577 | 42810 | 34 | 0.015482 | 0 | 0.001361 |
| 2.7   | 100    | 112.1842 | 43616 | 41 | 0.000583 | 0 | 2.59E-05 |
| 32.2  | 36.072 | 112.3882 | 43706 | 59 | 1.1E-05  | 0 | 3.38E-09 |
| 59.1  | 22.764 | 16.5762  | 5369  | 57 | 7.26E-05 | 0 | 5.29E-06 |
| 7     | 100    | 116.7573 | 45526 | 46 | 0.000195 | 0 | 1.43E-05 |
| 7.5   | 100    | 117.2639 | 45727 | 53 | 4.18E-05 | 0 | 3.64E-08 |
| 25    | 22.71  | 113.1891 | 44064 | 82 | 5.59E-08 | 0 | 2.8E-11  |
| 42.5  | 27.23  | 112.8938 | 43936 | 61 | 7.6E-06  | 0 | 1.95E-09 |
| 41    | 14.214 | 112.6868 | 43844 | 88 | 1.42E-08 | 0 | 3.31E-12 |
| 2.9   | 100    | 114.7052 | 44684 | 50 | 8.23E-05 | 0 | 6.46E-06 |
| 2.7   | 100    | 114.4128 | 44560 | 33 | 0.00399  | 0 | 0.000172 |
| 10.4  | 100    | 113.9086 | 44373 | 43 | 0.000407 | 0 | 1.04E-05 |
| 25.7  | 80.342 | 113.695  | 44291 | 87 | 1.89E-08 | 0 | 6.48E-13 |
| 46.5  | 63.544 | 113.4039 | 44166 | 61 | 6.32E-06 | 0 | 2.53E-10 |
| 10.1  | 100    | 114.1971 | 44481 | 82 | 5.68E-08 | 0 | 1.69E-09 |
| 10.1  | 100    | 121.2195 | 47347 | 51 | 0.000132 | 0 | 9.44E-08 |
| 23    | 59.512 | 120.7157 | 47148 | 77 | 3.09E-07 | 0 | 3.13E-09 |
| 6.5   | 100    | 134.3365 | 51406 | 65 | 4.96E-06 | 0 | 5.5E-05  |
| 25.7  | 100    | 77.3784  | 31495 | 46 | 0.000632 | 0 | 9.57E-08 |
| 9     | 100    | 136.0603 | 52136 | 42 | 0.000698 | 0 | 2E-05    |
| 16.7  | 100    | 136.083  | 52146 | 38 | 0.00168  | 0 | 6.32E-07 |
| 6.5   | 100    | 134.3365 | 51406 | 65 | 4.96E-06 | 0 | 5.5E-05  |
| 48.1  | 56.593 | 135.5503 | 51920 | 34 | 0.004401 | 0 | 5.32E-06 |
| 25.7  | 68.496 | 135.5748 | 51932 | 42 | 0.000646 | 0 | 4.03E-07 |
| 88.4  | 34.362 | 43.3242  | 15420 | 38 | 0.004324 | 0 | 0.001069 |
| 28.3  | 25.792 | 141.0515 | 54464 | 69 | 5.37E-06 | 0 | 2.51E-08 |
| 107   | 14.455 | 141.0498 | 54462 | 63 | 2.01E-05 | 0 | 7.61E-09 |
| 39.3  | 72.473 | 141.0784 | 54479 | 45 | 0.001427 | 0 | 1.08E-05 |
| 1513  | 100    | 141.0731 | 54475 | 71 | 3.45E-06 | 0 | 1.29E-08 |

|       |        |          |       |    |          |          |          |
|-------|--------|----------|-------|----|----------|----------|----------|
| 4.1   | 38.968 | 37.6111  | 13187 | 72 | 1.49E-06 | 0        | 0.00057  |
| 8.2   | 100    | 67.4478  | 27245 | 19 | 0.455388 | 0        | 0.001314 |
| 4.9   | 100    | 73.5867  | 29926 | 41 | 0.001605 | 0        | 4.46E-06 |
| 70.5  | 100    | 140.9493 | 54402 | 96 | 8.71E-09 | 0        | 1.55E-06 |
| 11.8  | 100    | 76.8709  | 31285 | 28 | 0.0493   | 0        | 0.000112 |
| 7     | 100    | 77.2375  | 31438 | 45 | 0.000924 | 0        | 6.86E-05 |
| 3.6   | 100    | 72.8213  | 29594 | 52 | 5.09E-05 | 0        | 7.07E-06 |
| 8.9   | 100    | 72.8321  | 29599 | 71 | 7.08E-07 | 0        | 4.38E-08 |
| 56.1  | 100    | 16.4851  | 5325  | 37 | 0.007276 | 0.000141 | 0.001706 |
| 9.8   | 100    | 101.5842 | 36333 | 23 | 0.205871 | 0.000273 | 0.001875 |
| 5.6   | 100    | 117.036  | 45634 | 22 | 0.051463 | 0.000525 | 0.002372 |
| 5.9   | 100    | 101.5316 | 36310 | 21 | 0.26565  | 0.000758 | 0.002941 |
| 2.2   | 100    | 115.2202 | 44892 | 23 | 0.04853  | 0.001022 | 0.004627 |
| 111.6 | 100    | 13.5753  | 3804  | 37 | 0.005878 | 0.001022 | 0.004648 |
| 13.1  | 100    | 19.9324  | 6239  | 35 | 0.010573 | 0.001114 | 0.00612  |
| 40.4  | 100    | 19.9824  | 7078  | 37 | 0.007912 | 0.001114 | 0.005954 |
| 46.4  | 57.436 | 40.7013  | 14385 | 45 | 0.000428 | 0.00121  | 0.006482 |
| 34.4  | 19.345 | 40.9554  | 14491 | 51 | 0.00011  | 0.00121  | 0.00657  |
| 13.6  | 100    | 67.3707  | 22797 | 19 | 0.529084 | 0.001576 | 0.008239 |
| 0.9   | 100    | 100.3093 | 38145 | 19 | 0.431891 | 0.002079 | 0.01204  |
| 1.1   | 100    | 99.79    | 35617 | 23 | 0.193016 | 0.002079 | 0.01229  |
| 3.4   | 100    | 99.6541  | 37852 | 19 | 0.399418 | 0.002177 | 0.01238  |
| 41.2  | 100    | 43.2584  | 15395 | 22 | 0.157389 | 0.002315 | 0.0141   |
| 69.5  | 2.949  | 50.1119  | 18059 | 36 | 0.009088 | 0.002315 | 0.01361  |
| 285.2 | 44.916 | 44.057   | 15656 | 23 | 0.134444 | 0.002376 | 0.01462  |
| 59.7  | 22.558 | 48.8991  | 17115 | 38 | 0.005952 | 0.002376 | 0.01485  |
| 1.3   | 100    | 101.5273 | 36308 | 19 | 0.522273 | 0.002376 | 0.0146   |
| 1.3   | 100    | 101.5273 | 36308 | 19 | 0.522273 | 0.002376 | 0.0146   |
| 65.2  | 100    | 66.4597  | 22443 | 22 | 0.21184  | 0.002376 | 0.01433  |
| 72    | 100    | 44.5711  | 15859 | 21 | 0.217483 | 0.002777 | 0.01816  |
| 2.2   | 100    | 100.7069 | 38867 | 16 | 0.194753 | 0.002843 | 0.0183   |
| 112.5 | 100    | 25.7277  | 8123  | 15 | 0.889239 | 0.003254 | 0.02128  |
| 220.8 | 31.591 | 44.0662  | 15661 | 22 | 0.154211 | 0.003254 | 0.0211   |
| 33.7  | 100    | 44.9831  | 16034 | 27 | 0.054322 | 0.00337  | 0.02315  |
| 18.4  | 100    | 48.9706  | 17146 | 35 | 0.011784 | 0.00337  | 0.02192  |
| 32.7  | 100    | 39.6427  | 13975 | 19 | 0.303599 | 0.003736 | 0.0269   |
| 0.9   | 100    | 99.5565  | 37810 | 14 | 1.494066 | 0.003736 | 0.02679  |
| 0.9   | 100    | 99.5565  | 37810 | 14 | 1.494066 | 0.003736 | 0.02679  |
| 36.4  | 100    | 48.2614  | 16913 | 13 | 2.390134 | 0.004424 | 0.03169  |
| 18.3  | 100    | 38.2979  | 13319 | 41 | 0.00163  | 0.004643 | 0.03288  |
| 4.3   | 100    | 133.8334 | 51182 | 30 | 0.015744 | 0.00573  | 0.04052  |
| 4.3   | 100    | 133.8334 | 51182 | 30 | 0.015744 | 0.00573  | 0.04052  |
| 4.2   | 100    | 17.4343  | 5026  | 41 | 0.001913 | 0.005792 | 0.04176  |
| 1.5   | 100    | 96.9077  | 35463 | 15 | 1.281328 | 0.006428 | 0.04732  |
| 1.5   | 100    | 96.9077  | 35463 | 15 | 1.281328 | 0.006428 | 0.04732  |
| 2.3   | 100    | 94.195   | 35491 | 18 | 0.567271 | 0.007836 | 0.05598  |
| 40    | 100    | 49.9414  | 17991 | 20 | 0.301895 | 0.007969 | 0.05841  |
| 0.9   | 100    | 101.0711 | 38480 | 17 | 0.843828 | 0.008034 | 0.05869  |
| 0.9   | 100    | 101.0711 | 38480 | 17 | 0.843828 | 0.008034 | 0.05869  |
| 0     | 100    | 72.3192  | 29375 | 9  | 1.229486 | 0.008559 | 0.06417  |
| 0.4   | 100    | 101.187  | 38532 | 12 | 1.853354 | 0.009498 | 0.07178  |
| 10.8  | 100    | 68.2577  | 25168 | 22 | 0.156714 | 0        | 0.000456 |



|       |        |          |       |    |          |          |          |
|-------|--------|----------|-------|----|----------|----------|----------|
| 6.6   | 100    | 70.2701  | 25981 | 49 | 0.000289 | 0        | 2.2E-05  |
| 18.9  | 83.072 | 69.7683  | 25786 | 62 | 1.58E-05 | 0        | 3.43E-08 |
| 8.7   | 100    | 69.3993  | 25640 | 37 | 0.00421  | 0        | 0.000609 |
| 21.3  | 5.436  | 69.2644  | 25589 | 64 | 1E-05    | 0        | 8.17E-08 |
| 16.9  | 100    | 68.8984  | 25444 | 81 | 1.97E-07 | 0        | 5.95E-07 |
| 20.6  | 9.104  | 68.7614  | 25386 | 70 | 2.26E-06 | 0        | 7.06E-09 |
| 12.6  | 100    | 69.2743  | 25594 | 39 | 0.00314  | 0        | 8.48E-05 |
| 30.3  | 100    | 56.7098  | 18833 | 32 | 0.024672 | 0        | 0.000739 |
| 2.2   | 100    | 78.029   | 28923 | 34 | 0.009843 | 0        | 0.000431 |
| 93.6  | 100    | 15.8974  | 4549  | 19 | 0.370731 | 0        | 0.001391 |
| 19.6  | 100    | 86.6661  | 35398 | 36 | 0.00542  | 0        | 0.000372 |
| 14.9  | 100    | 87.1729  | 35618 | 39 | 0.002582 | 0        | 0.000464 |
| 21.1  | 42.365 | 43.7517  | 15676 | 49 | 0.000212 | 0        | 1.51E-06 |
| 7.2   | 100    | 62.3097  | 21049 | 41 | 0.001838 | 0        | 1.35E-05 |
| 282.6 | 67.707 | 15.9436  | 4788  | 18 | 0.489157 | 0        | 0.001273 |
| 24.9  | 100    | 68.2775  | 23481 | 19 | 0.374937 | 0        | 0.001288 |
| 0     | 100    | 140.9008 | 55436 | 85 | 9.3E-08  | 0        | 2.4E-06  |
| 20.4  | 100    | 124.6214 | 48696 | 51 | 0.00017  | 0        | 4.07E-05 |
| 9.3   | 100    | 123.1848 | 48129 | 59 | 2.55E-05 | 0        | 9.03E-06 |
| 44.2  | 31.068 | 123.114  | 48103 | 58 | 3.41E-05 | 0        | 3.31E-05 |
| 27    | 8.789  | 122.6803 | 47929 | 70 | 2.21E-06 | 0        | 2.1E-05  |
| 72    | 2.713  | 122.6078 | 47896 | 58 | 3.23E-05 | 0        | 1.06E-05 |
| 3.5   | 100    | 122.1704 | 47718 | 40 | 0.00186  | 0        | 0.000205 |
| 6.8   | 59.435 | 119.8214 | 45168 | 62 | 2.44E-05 | 0        | 2.85E-05 |
| 0.3   | 93.757 | 115.7038 | 44157 | 89 | 1.28E-08 | 0        | 6.57E-06 |
| 0.4   | 100    | 116.2076 | 44354 | 73 | 4.35E-07 | 0        | 2.57E-05 |
| 38.6  | 94.607 | 65.5262  | 23889 | 66 | 4.3E-06  | 0        | 3.54E-06 |
| 42.2  | 55.104 | 81.6529  | 30914 | 38 | 0.002067 | 0        | 0.000959 |
| 16.7  | 100    | 68.1108  | 24962 | 30 | 0.036873 | 0        | 0.000941 |
| 12.8  | 15.377 | 67.606   | 24758 | 38 | 0.006233 | 0        | 0.000871 |
| 47.2  | 100    | 66.029   | 24105 | 56 | 4.17E-05 | 0        | 4.51E-05 |
| 8.2   | 14.177 | 66.5876  | 24340 | 34 | 0.015407 | 0        | 0.000655 |
| 9.5   | 3.413  | 67.0944  | 24556 | 38 | 0.005779 | 0        | 0.000162 |
| 84.9  | 100    | 18.5234  | 6386  | 34 | 0.0199   | 0        | 3.64E-05 |
| 36.8  | 100    | 141.0958 | 54487 | 40 | 0.003365 | 0        | 7.32E-05 |
| 0.9   | 54.154 | 70.0464  | 28380 | 74 | 4.98E-07 | 0        | 1.92E-06 |
| 45.1  | 57.136 | 141.317  | 54628 | 65 | 9.5E-06  | 0        | 2.29E-06 |
| 196.6 | 30.087 | 141.303  | 54619 | 91 | 2.59E-08 | 0        | 9.67E-10 |
| 104.3 | 100    | 29.6058  | 11140 | 26 | 0.097832 | 0        | 0.001339 |
| 0.4   | 100    | 142.8727 | 53567 | 38 | 0.001094 | 0.000141 | 0.00157  |
| 5.9   | 100    | 29.8792  | 9053  | 21 | 0.295515 | 0.000141 | 0.001815 |
| 27    | 43.183 | 81.1508  | 30705 | 39 | 0.001938 | 0.000141 | 0.001642 |
| 0     | 100    | 74.1912  | 30177 | 17 | 0.029103 | 0.000273 | 0.001945 |
| 4.8   | 100    | 17.7521  | 5147  | 44 | 0.001687 | 0.000273 | 0.002008 |
| 16.3  | 86.167 | 119.8034 | 45160 | 32 | 0.021096 | 0.000525 | 0.002632 |
| 66.7  | 53.069 | 65.6088  | 23928 | 43 | 0.000954 | 0.000525 | 0.002537 |
| 49.5  | 68.183 | 87.7035  | 33277 | 35 | 0.010309 | 0.000758 | 0.003213 |
| 10.3  | 100    | 26.5593  | 7990  | 40 | 0.002704 | 0.000758 | 0.002783 |
| 38.1  | 100    | 15.9429  | 4388  | 20 | 0.326925 | 0.000758 | 0.00286  |
| 16    | 100    | 68.77    | 25390 | 31 | 0.020852 | 0.000868 | 0.003338 |
| 8.6   | 100    | 67.1718  | 23047 | 33 | 0.005871 | 0.000951 | 0.003719 |
| 2.2   | 100    | 128.9449 | 47480 | 30 | 0.044345 | 0.001022 | 0.005643 |

|       |        |          |       |    |          |          |          |
|-------|--------|----------|-------|----|----------|----------|----------|
| 103.3 | 100    | 52.2816  | 18503 | 26 | 0.100506 | 0.001022 | 0.004608 |
| 0     | 100    | 109.1072 | 42349 | 30 | 0.012243 | 0.001022 | 0.005479 |
| 49.6  | 41.132 | 48.1614  | 18943 | 38 | 0.005088 | 0.001022 | 0.00482  |
| 26.5  | 100    | 64.2762  | 23744 | 32 | 0.017057 | 0.001022 | 0.00553  |
| 0.6   | 100    | 124.2116 | 48533 | 32 | 0.013924 | 0.001022 | 0.004789 |
| 13.2  | 100    | 123.6168 | 48296 | 32 | 0.012614 | 0.001022 | 0.005372 |
| 6.6   | 100    | 62.6934  | 23096 | 51 | 8.58E-05 | 0.001114 | 0.006185 |
| 1.3   | 100    | 129.4009 | 48109 | 35 | 0.013189 | 0.001114 | 0.006158 |
| 8.8   | 100    | 124.1205 | 48498 | 33 | 0.011024 | 0.00121  | 0.006498 |
| 37.5  | 100    | 46.0978  | 18075 | 33 | 0.005826 | 0.002012 | 0.01051  |
| 9.1   | 100    | 29.0951  | 10937 | 17 | 0.770092 | 0.002079 | 0.01141  |
| 28.2  | 100    | 79.976   | 29952 | 38 | 0.001957 | 0.002376 | 0.0154   |
| 9.4   | 100    | 26.5254  | 7979  | 33 | 0.013743 | 0.002543 | 0.01603  |
| 4.6   | 100    | 85.8072  | 30862 | 33 | 0.018548 | 0.00302  | 0.01957  |
| 21.3  | 100    | 68.1461  | 23432 | 19 | 0.406348 | 0.00337  | 0.02292  |
| 88.6  | 100    | 63.7636  | 23539 | 23 | 0.119516 | 0.00337  | 0.02229  |
| 10.6  | 100    | 81.046   | 30664 | 19 | 0.190164 | 0.003674 | 0.02548  |
| 24.6  | 100    | 44.0764  | 13982 | 9  | 3.808522 | 0.003674 | 0.0264   |
| 0     | 100    | 70.1145  | 28409 | 25 | 0.034703 | 0.007836 | 0.0569   |
| 1.8   | 100    | 128.874  | 47449 | 19 | 0.533235 | 0.007836 | 0.05685  |
| 28.8  | 100    | 15.9277  | 4497  | 10 | 3.609508 | 0.008361 | 0.06271  |
| 94.5  | 100    | 61.7901  | 20837 | 31 | 0.031853 | 0        | 0.00099  |
| 20.8  | 100    | 62.155   | 20987 | 55 | 0.000132 | 0        | 4.39E-05 |
| 10.5  | 100    | 68.3011  | 23490 | 38 | 0.003948 | 0        | 2.28E-06 |
| 25.9  | 64.543 | 68.2676  | 23477 | 30 | 0.031417 | 0        | 1.09E-05 |
| 35.6  | 100    | 67.7641  | 23281 | 8  | 4.04808  | 0        | 0.000348 |
| 2.1   | 100    | 42.3346  | 13353 | 59 | 4E-05    | 0        | 0.000805 |
| 23.8  | 100    | 116.4874 | 42502 | 56 | 3.28E-05 | 0        | 9.2E-08  |
| 16.5  | 82.16  | 115.9779 | 42281 | 34 | 0.004781 | 0        | 3.53E-05 |
| 44.5  | 100    | 73.6842  | 25272 | 12 | 3.298147 | 0        | 0.000284 |
| 27.1  | 20.973 | 73.5238  | 25198 | 66 | 1.39E-05 | 0        | 3.17E-08 |
| 19.2  | 100    | 65.2564  | 23713 | 37 | 0.006952 | 0        | 0.000865 |
| 13.9  | 100    | 68.4738  | 25468 | 55 | 7.36E-05 | 0        | 9.6E-05  |
| 23.8  | 26.188 | 71.4655  | 26668 | 92 | 3.19E-08 | 0        | 9.39E-09 |
| 9.2   | 100    | 71.5283  | 26695 | 61 | 3.98E-05 | 0        | 1.79E-05 |
| 20.2  | 100    | 48.4273  | 16928 | 50 | 0.000187 | 0        | 2.44E-05 |
| 10.6  | 100    | 66.5942  | 24343 | 60 | 2.48E-05 | 0        | 1.01E-05 |
| 78.5  | 29.051 | 141.1555 | 54525 | 68 | 3.79E-06 | 0        | 9.4E-06  |
| 10.7  | 100    | 60.3675  | 24201 | 38 | 0.005717 | 0        | 0.001144 |
| 116.4 | 100    | 35.3919  | 12337 | 54 | 0.000117 | 0        | 0.000421 |
| 117.4 | 66.029 | 41.4192  | 14301 | 50 | 6.97E-05 | 0.000141 | 0.00167  |
| 6.2   | 100    | 17.2477  | 4963  | 61 | 1.34E-05 | 0.000273 | 0.001992 |
| 83.8  | 100    | 42.6872  | 15089 | 30 | 0.030711 | 0.000525 | 0.002637 |
| 8.5   | 100    | 66.7227  | 24396 | 34 | 0.008269 | 0.00065  | 0.002671 |
| 107.5 | 40.56  | 35.1858  | 12247 | 59 | 3.3E-05  | 0.000758 | 0.00315  |
| 21.7  | 100    | 65.8483  | 22201 | 36 | 0.007082 | 0.000951 | 0.004057 |
| 11    | 20.778 | 141.1576 | 54527 | 36 | 0.005901 | 0.000951 | 0.003801 |
| 10.5  | 100    | 116.1543 | 42355 | 34 | 0.005563 | 0.000951 | 0.004026 |
| 11.2  | 100    | 45.2236  | 15705 | 57 | 4.68E-05 | 0.001022 | 0.00556  |
| 21.4  | 100    | 60.8762  | 24429 | 27 | 0.068138 | 0.001022 | 0.004643 |
| 0.8   | 100    | 116.9916 | 42709 | 27 | 0.025675 | 0.001022 | 0.005648 |
| 15.9  | 100    | 64.7539  | 23505 | 29 | 0.032745 | 0.00121  | 0.006456 |

|       |        |          |       |    |          |          |          |
|-------|--------|----------|-------|----|----------|----------|----------|
| 19.9  | 100    | 40.9143  | 14112 | 49 | 8.56E-05 | 0.001308 | 0.006988 |
| 3.5   | 100    | 74.0386  | 25424 | 30 | 0.049752 | 0.001576 | 0.008857 |
| 27.7  | 100    | 73.1069  | 25023 | 12 | 3.440076 | 0.001576 | 0.008455 |
| 81.4  | 100    | 58.3334  | 19349 | 35 | 0.010747 | 0.001854 | 0.009804 |
| 14.5  | 100    | 37.9719  | 13320 | 47 | 0.000391 | 0.002012 | 0.01095  |
| 4     | 100    | 67.7951  | 23294 | 26 | 0.065645 | 0.002376 | 0.01545  |
| 2.3   | 100    | 115.6445 | 42147 | 21 | 0.120941 | 0.002843 | 0.0192   |
| 6.2   | 100    | 73.0068  | 24986 | 19 | 0.62097  | 0.002843 | 0.01851  |
| 4.9   | 100    | 116.6639 | 42579 | 27 | 0.023278 | 0.002931 | 0.01956  |
| 34.2  | 100    | 42.6323  | 15065 | 27 | 0.070428 | 0.00337  | 0.02319  |
| 106.5 | 100    | 13.1293  | 3646  | 24 | 0.16581  | 0.00337  | 0.02211  |
| 43.5  | 100    | 56.4419  | 18728 | 28 | 0.051559 | 0.00337  | 0.02421  |
| 26.1  | 100    | 41.1537  | 14203 | 32 | 0.003547 | 0.004049 | 0.02921  |
| 0.4   | 100    | 23.6592  | 7053  | 30 | 0.04265  | 0.004266 | 0.03071  |
| 0.4   | 100    | 23.6592  | 7053  | 30 | 0.04265  | 0.004266 | 0.03071  |
| 14.9  | 100    | 41.9238  | 14474 | 37 | 0.001121 | 0.005618 | 0.03866  |
| 4     | 100    | 70.9623  | 26466 | 17 | 0.857335 | 0.005865 | 0.04306  |
| 50.3  | 100    | 57.9553  | 19349 | 25 | 0.118001 | 0.00599  | 0.04541  |
| 18.4  | 100    | 43.1379  | 15272 | 29 | 0.033816 | 0.006872 | 0.04992  |
| 231.5 | 51.448 | 56.9458  | 18937 | 29 | 0.045174 | 0.007057 | 0.05236  |
| 229.8 | 72.166 | 57.4492  | 19140 | 33 | 0.017575 | 0.009514 | 0.07399  |
| 9.4   | 100    | 68.0796  | 25096 | 45 | 0.001259 | 0        | 0.000326 |
| 37.6  | 100    | 67.5743  | 24895 | 48 | 0.000695 | 0        | 8.69E-06 |
| 83.9  | 100    | 73.352   | 25573 | 46 | 0.001122 | 0        | 0.000793 |
| 18.2  | 100    | 81.5478  | 33209 | 40 | 0.000615 | 0        | 1.19E-05 |
| 13.7  | 100    | 81.4456  | 33168 | 26 | 0.016447 | 0        | 0.001072 |
| 8.9   | 100    | 98.4645  | 35106 | 51 | 0.000222 | 0        | 1.18E-05 |
| 17.5  | 100    | 98.3873  | 35075 | 49 | 0.000377 | 0        | 3.15E-06 |
| 6.3   | 100    | 140.7465 | 52410 | 68 | 4.7E-06  | 0        | 1.32E-11 |
| 15.3  | 100    | 62.2221  | 22478 | 30 | 0.038    | 0        | 0.000486 |
| 61.4  | 100    | 141.1778 | 54538 | 86 | 9.65E-08 | 0        | 4.11E-10 |
| 11    | 59.552 | 141.3185 | 54629 | 75 | 1.13E-06 | 0        | 1.76E-09 |
| 57.9  | 100    | 92.4398  | 34268 | 59 | 4.39E-06 | 0        | 6.13E-06 |
| 30.3  | 100    | 93.4498  | 34651 | 52 | 2.68E-05 | 0        | 8.88E-06 |
| 70.5  | 61.22  | 92.9464  | 34468 | 59 | 5.28E-06 | 0        | 9.45E-06 |
| 53    | 100    | 89.816   | 33521 | 45 | 0.001005 | 0.000141 | 0.001661 |
| 5.9   | 100    | 89.9512  | 33578 | 41 | 0.00267  | 0.000273 | 0.002026 |
| 133.3 | 100    | 75.6032  | 26040 | 40 | 0.004092 | 0.000525 | 0.002384 |
| 103.9 | 81.63  | 58.816   | 21123 | 29 | 0.049037 | 0.000525 | 0.002368 |
| 4.8   | 100    | 82.8979  | 29669 | 28 | 0.060799 | 0.000758 | 0.00293  |
| 15.8  | 100    | 83.4004  | 29858 | 24 | 0.179343 | 0.000868 | 0.003324 |
| 7.8   | 100    | 92.5632  | 34319 | 35 | 0.001084 | 0.000951 | 0.003976 |
| 48    | 100    | 52.5735  | 20878 | 41 | 0.001591 | 0.001022 | 0.004888 |
| 71.3  | 100    | 52.0698  | 20656 | 43 | 0.000952 | 0.001114 | 0.00632  |
| 3.9   | 100    | 67.069   | 24697 | 31 | 0.031453 | 0.001576 | 0.008837 |
| 0.4   | 100    | 128.7265 | 49000 | 26 | 0.123742 | 0.002543 | 0.01611  |
| 26.6  | 100    | 76.1086  | 26234 | 42 | 0.00229  | 0.002719 | 0.01683  |
| 18.6  | 100    | 33.3035  | 12672 | 9  | 5.627518 | 0.002777 | 0.01801  |
| 80.9  | 100    | 61.5067  | 22243 | 15 | 0.210055 | 0.002843 | 0.01899  |
| 77.7  | 30.231 | 28.9103  | 9360  | 24 | 0.121355 | 0.003533 | 0.02477  |
| 0.3   | 100    | 97.9572  | 34904 | 13 | 1.285647 | 0.003674 | 0.02505  |
| 11.5  | 100    | 90.5554  | 33827 | 29 | 0.038745 | 0.003736 | 0.02757  |

|       |        |          |       |     |          |          |          |
|-------|--------|----------|-------|-----|----------|----------|----------|
| 26.6  | 100    | 74.5122  | 26077 | 16  | 0.894323 | 0.004643 | 0.03321  |
| 102.8 | 38.165 | 28.7912  | 9315  | 21  | 0.266361 | 0.005325 | 0.03633  |
| 13.3  | 100    | 73.3806  | 25586 | 25  | 0.118791 | 0.007423 | 0.05399  |
| 15.3  | 100    | 99.8616  | 37490 | 45  | 0.000605 | 0        | 0.000151 |
| 92.6  | 100    | 140.5921 | 52024 | 77  | 8.66E-07 | 0        | 8.86E-10 |
| 14.6  | 100    | 140.6052 | 52030 | 84  | 1.86E-07 | 0        | 8.02E-09 |
| 48.8  | 100    | 14.5975  | 4054  | 15  | 1.063023 | 0        | 7.84E-05 |
| 59.9  | 100    | 140.7792 | 52110 | 83  | 1.28E-07 | 0        | 9.85E-09 |
| 7.7   | 100    | 132.2009 | 54242 | 39  | 0.003037 | 0        | 0.000247 |
| 130.8 | 100    | 14.367   | 4076  | 15  | 1.128359 | 0        | 1.91E-05 |
| 49.4  | 100    | 14.0427  | 3937  | 6   | 10.51831 | 0        | 0.000254 |
| 0     | 48.004 | 141.1338 | 57776 | 74  | 5.56E-07 | 0        | 2.99E-06 |
| 53.8  | 1.614  | 140.8073 | 57617 | 78  | 3.42E-07 | 0        | 1.47E-07 |
| 155.7 | 0.822  | 140.8066 | 57616 | 87  | 4.84E-08 | 0        | 2.29E-08 |
| 29.5  | 60.246 | 140.6253 | 57526 | 75  | 1.39E-06 | 0        | 3.06E-08 |
| 273.7 | 6.363  | 140.6159 | 57521 | 112 | 2.96E-10 | 0        | 6.86E-12 |
| 113.5 | 0.879  | 140.6152 | 57520 | 77  | 8.4E-07  | 0        | 3.12E-09 |
| 19.7  | 66.46  | 140.5867 | 57506 | 111 | 2.51E-10 | 0        | 6.22E-09 |
| 8.1   | 25.63  | 140.585  | 57505 | 55  | 0.000117 | 0        | 0.000112 |
| 76.7  | 100    | 14.3034  | 4049  | 6   | 9.066675 | 0        | 0.000958 |
| 13.2  | 100    | 26.508   | 9150  | 24  | 0.175947 | 0        | 0.001056 |
| 18    | 40.632 | 140.6277 | 55288 | 41  | 0.004154 | 0        | 0.000213 |
| 96.8  | 56.484 | 41.3537  | 13005 | 42  | 0.001672 | 0        | 0.000666 |
| 21.8  | 100    | 41.8561  | 13181 | 42  | 0.001435 | 0        | 0.000949 |
| 79.3  | 13.604 | 88.0696  | 33442 | 45  | 0.000594 | 0        | 1.77E-06 |
| 48.6  | 5.161  | 87.5655  | 33217 | 42  | 0.00129  | 0        | 2.31E-06 |
| 16.6  | 100    | 100.0027 | 36806 | 46  | 0.000395 | 0        | 5E-07    |
| 11.7  | 55.092 | 100.1162 | 36859 | 59  | 1.92E-05 | 0        | 6.48E-08 |
| 3.2   | 100    | 101.1257 | 37286 | 34  | 0.006973 | 0        | 2.36E-05 |
| 7.3   | 52.128 | 100.6214 | 37079 | 66  | 4.91E-06 | 0        | 4.3E-08  |
| 21.4  | 100    | 100.5056 | 37029 | 52  | 0.000108 | 0        | 3.07E-08 |
| 25.7  | 60.731 | 62.75    | 22740 | 49  | 0.000187 | 0        | 7.52E-07 |
| 32.4  | 100    | 12.833   | 3518  | 53  | 0.000103 | 0        | 5.38E-05 |
| 18.8  | 14.861 | 63.2557  | 22964 | 52  | 0.000111 | 0        | 4.01E-07 |
| 13.1  | 100    | 63.7582  | 23167 | 30  | 0.015802 | 0        | 0.000994 |
| 37.3  | 60.331 | 123.8437 | 46922 | 70  | 4.21E-06 | 0        | 2.93E-09 |
| 2.9   | 100    | 114.7761 | 42981 | 68  | 5.82E-06 | 0        | 1.86E-06 |
| 42.5  | 75.467 | 83.4601  | 31423 | 71  | 1.66E-07 | 0        | 6.29E-07 |
| 80.6  | 100    | 45.2629  | 17702 | 30  | 0.021109 | 0        | 1.5E-05  |
| 407   | 100    | 13.0403  | 3719  | 59  | 2.49E-05 | 0        | 1.88E-05 |
| 88.1  | 99.409 | 12.7396  | 3520  | 50  | 0.000218 | 0        | 4.43E-05 |
| 89    | 100    | 20.2535  | 7201  | 26  | 0.114549 | 0        | 0.001126 |
| 10    | 100    | 25.8963  | 9645  | 24  | 0.145415 | 0        | 0.001228 |
| 15.4  | 100    | 24.8043  | 9171  | 26  | 0.093208 | 0        | 0.001332 |
| 74.7  | 57.967 | 24.8959  | 9212  | 31  | 0.031299 | 0        | 0.000134 |
| 18    | 100    | 40.4257  | 15638 | 38  | 0.006536 | 0        | 1.09E-06 |
| 67.2  | 100    | 40.7074  | 15751 | 33  | 0.018374 | 0        | 1.45E-07 |
| 13    | 100    | 40.9289  | 15838 | 36  | 0.010182 | 0        | 5.29E-06 |
| 22.6  | 100    | 90.2194  | 32687 | 28  | 0.054335 | 0        | 0.000477 |
| 25    | 100    | 40.2028  | 15535 | 10  | 3.664882 | 0        | 0.000597 |
| 25.3  | 100    | 40.847   | 12821 | 41  | 0.00205  | 0.000141 | 0.001578 |
| 4.8   | 100    | 40.6722  | 15736 | 29  | 0.055759 | 0.000141 | 0.001645 |

|       |        |          |       |    |          |          |          |
|-------|--------|----------|-------|----|----------|----------|----------|
| 6.8   | 72.681 | 124.1821 | 47072 | 27 | 0.07371  | 0.000273 | 0.002039 |
| 34.8  | 100    | 25.3084  | 9398  | 20 | 0.360273 | 0.000525 | 0.002594 |
| 10.4  | 100    | 22.9802  | 8384  | 19 | 0.525545 | 0.00065  | 0.002775 |
| 19.6  | 100    | 62.8878  | 22801 | 23 | 0.087401 | 0.000758 | 0.002852 |
| 8.5   | 100    | 124.3488 | 47151 | 28 | 0.06817  | 0.000951 | 0.003936 |
| 121.2 | 100    | 38.7622  | 12078 | 35 | 0.008021 | 0.000951 | 0.004207 |
| 39.9  | 100    | 57.1424  | 20927 | 44 | 0.000824 | 0.001022 | 0.005172 |
| 28.1  | 100    | 56.3657  | 20118 | 36 | 0.004817 | 0.00141  | 0.007278 |
| 9.6   | 100    | 83.5555  | 31467 | 30 | 0.001893 | 0.001576 | 0.008288 |
| 4.8   | 100    | 83.0457  | 31246 | 32 | 0.001493 | 0.001576 | 0.008329 |
| 1     | 100    | 99.3578  | 37272 | 30 | 0.023084 | 0.002012 | 0.01064  |
| 51.1  | 100    | 39.2844  | 12254 | 35 | 0.007974 | 0.002079 | 0.01158  |
| 0     | 100    | 11.6413  | 3190  | 49 | 0.000115 | 0.002079 | 0.01177  |
| 196   | 29.656 | 57.6465  | 21120 | 50 | 0.0002   | 0.002257 | 0.01292  |
| 166.5 | 100    | 38.7806  | 12086 | 30 | 0.021168 | 0.002315 | 0.01296  |
| 12.3  | 100    | 63.3893  | 23018 | 32 | 0.011155 | 0.002315 | 0.01337  |
| 67.4  | 100    | 57.3785  | 20515 | 43 | 0.001008 | 0.002543 | 0.01562  |
| 28.4  | 100    | 58.1667  | 21320 | 39 | 0.002726 | 0.002777 | 0.01744  |
| 2.5   | 100    | 39.1122  | 12218 | 43 | 0.000526 | 0.002777 | 0.01806  |
| 0     | 100    | 12.0376  | 3431  | 43 | 0.000469 | 0.002777 | 0.01754  |
| 0.8   | 100    | 114.3744 | 42804 | 24 | 0.14266  | 0.003254 | 0.02097  |
| 30.5  | 100    | 41.3878  | 13019 | 42 | 0.001483 | 0.00337  | 0.02391  |
| 0.9   | 100    | 96.1175  | 35992 | 20 | 0.203437 | 0.00337  | 0.02315  |
| 59.8  | 100    | 43.9777  | 15132 | 41 | 0.001807 | 0.003674 | 0.02499  |
| 115.3 | 99.407 | 27.5936  | 9067  | 48 | 0.000143 | 0.003736 | 0.02762  |
| 134.8 | 5.462  | 56.8697  | 20312 | 47 | 0.000366 | 0.003736 | 0.02762  |
| 15    | 100    | 88.013   | 33419 | 30 | 0.021216 | 0.004192 | 0.03045  |
| 7.8   | 100    | 100.2625 | 37663 | 36 | 0.004674 | 0.004643 | 0.03313  |
| 2.1   | 100    | 37.2152  | 11532 | 38 | 0.001967 | 0.005196 | 0.03557  |
| 22.9  | 100    | 52.8426  | 19220 | 32 | 0.01149  | 0.005325 | 0.03708  |
| 5.1   | 100    | 99.2557  | 37229 | 25 | 0.067988 | 0.00573  | 0.04024  |
| 2.8   | 100    | 64.262   | 23371 | 23 | 0.079382 | 0.00573  | 0.04077  |
| 11.6  | 100    | 13.029   | 3715  | 31 | 0.015698 | 0.006428 | 0.047    |
| 26.1  | 100    | 51.9198  | 17000 | 31 | 0.015829 | 0.007969 | 0.05831  |
| 49    | 100    | 43.4737  | 14929 | 32 | 0.015297 | 0.009291 | 0.07084  |
| 1.1   | 100    | 115.7123 | 43333 | 55 | 0.000137 | 0        | 0.001281 |
| 49.6  | 100    | 65.7194  | 22159 | 40 | 0.001103 | 0        | 3.69E-05 |
| 10.2  | 100    | 65.7096  | 22155 | 70 | 1E-06    | 0        | 2.13E-05 |
| 18.5  | 100    | 65.2152  | 21962 | 36 | 0.002665 | 0        | 0.000153 |
| 19.3  | 100    | 111.4411 | 40393 | 81 | 3.23E-07 | 0        | 1.52E-06 |
| 35.4  | 79.766 | 111.4106 | 40380 | 65 | 1.41E-05 | 0        | 9.34E-06 |
| 3.5   | 100    | 110.9045 | 40184 | 45 | 0.001221 | 0        | 0.000706 |
| 30.1  | 100    | 105.881  | 38058 | 26 | 0.106482 | 0        | 4.89E-05 |
| 4     | 100    | 94.1289  | 35462 | 62 | 2.02E-05 | 0        | 0.000185 |
| 7.2   | 100    | 103.5835 | 39557 | 60 | 4.4E-05  | 0        | 7.73E-05 |
| 9.6   | 100    | 103.5717 | 39551 | 47 | 0.000704 | 0        | 0.00082  |
| 20.1  | 100    | 106.0158 | 40595 | 71 | 3.21E-06 | 0        | 3.67E-07 |
| 13.3  | 100    | 105.9715 | 40574 | 76 | 1.08E-06 | 0        | 4.08E-08 |
| 5.8   | 100    | 105.4605 | 40340 | 44 | 0.001929 | 0        | 2.9E-05  |
| 6.6   | 100    | 132.1756 | 51579 | 72 | 8.41E-07 | 0        | 7.68E-06 |
| 48    | 67.587 | 132.1407 | 51565 | 78 | 2.12E-07 | 0        | 3.01E-08 |
| 14    | 100    | 131.6389 | 51374 | 51 | 0.000113 | 0        | 0.000338 |

|       |        |          |       |     |          |          |          |
|-------|--------|----------|-------|-----|----------|----------|----------|
| 48.8  | 8.903  | 75.7576  | 28219 | 62  | 2.14E-05 | 0        | 2.97E-05 |
| 5.2   | 100    | 116.663  | 43806 | 42  | 0.002576 | 0        | 0.000642 |
| 62.4  | 100    | 141.6444 | 54814 | 77  | 1.67E-07 | 0        | 5.19E-10 |
| 54.2  | 9.749  | 141.1287 | 54507 | 93  | 8.32E-09 | 0        | 2.43E-11 |
| 5.6   | 100    | 141.6778 | 54831 | 95  | 7.74E-09 | 0        | 2.23E-12 |
| 25.5  | 100    | 63.8282  | 25709 | 57  | 7.13E-05 | 0        | 1.22E-05 |
| 9.9   | 38.988 | 73.4818  | 29880 | 63  | 1.89E-05 | 0        | 9.76E-07 |
| 12.1  | 100    | 72.9802  | 29661 | 60  | 3.95E-05 | 0        | 1.29E-06 |
| 40.6  | 100    | 36.7817  | 14141 | 44  | 0.001405 | 0        | 0.000871 |
| 6     | 98.381 | 140.8456 | 54339 | 23  | 0.228514 | 0.000141 | 0.001622 |
| 0     | 100    | 133.6718 | 52132 | 55  | 2.09E-05 | 0.000273 | 0.001819 |
| 18.5  | 100    | 54.2479  | 21595 | 40  | 0.003186 | 0.000525 | 0.002274 |
| 9.7   | 100    | 105.1271 | 39550 | 42  | 0.00284  | 0.00065  | 0.002759 |
| 5.4   | 100    | 116.6303 | 43790 | 41  | 0.00292  | 0.000868 | 0.003548 |
| 17.5  | 100    | 54.7264  | 19968 | 36  | 0.008552 | 0.000951 | 0.003955 |
| 434.1 | 63.645 | 17.3816  | 5183  | 14  | 0.039939 | 0.001022 | 0.005385 |
| 18.3  | 100    | 50.3731  | 19915 | 33  | 0.013144 | 0.001576 | 0.008649 |
| 1.2   | 100    | 131.6703 | 51386 | 29  | 0.017487 | 0.002012 | 0.01033  |
| 89.7  | 100    | 17.3966  | 5190  | 42  | 5.59E-05 | 0.002079 | 0.01141  |
| 3.8   | 100    | 115.82   | 43368 | 26  | 0.12077  | 0.002315 | 0.01409  |
| 3.3   | 100    | 109.0284 | 40549 | 44  | 0.001886 | 0.002376 | 0.0142   |
| 1.1   | 100    | 112      | 43530 | 33  | 0.014453 | 0.00337  | 0.02297  |
| 1.1   | 100    | 112      | 43530 | 33  | 0.014453 | 0.00337  | 0.02297  |
| 63.4  | 100    | 17.5208  | 4930  | 14  | 0.042285 | 0.003456 | 0.02428  |
| 16.1  | 100    | 76.0217  | 28326 | 24  | 0.153705 | 0.004192 | 0.03069  |
| 0.5   | 100    | 103.0679 | 39336 | 20  | 0.448928 | 0.004643 | 0.03328  |
| 121.4 | 100    | 54.7949  | 19997 | 23  | 0.168929 | 0.005271 | 0.03614  |
| 7.8   | 100    | 110.939  | 40198 | 32  | 0.02351  | 0.007636 | 0.05502  |
| 6.4   | 100    | 65.2075  | 21959 | 28  | 0.015297 | 0.009514 | 0.07389  |
| 36.7  | 40.966 | 48.1017  | 15497 | 53  | 0.000191 | 0        | 2.58E-07 |
| 25.9  | 100    | 48.2927  | 15574 | 30  | 0.030297 | 0        | 7.45E-06 |
| 13.1  | 100    | 47.7917  | 15376 | 33  | 0.016841 | 0        | 0.000193 |
| 32.6  | 100    | 30.768   | 9343  | 26  | 0.081303 | 0        | 0.000105 |
| 55.5  | 100    | 72.3707  | 25174 | 44  | 0.001325 | 0        | 0.000568 |
| 25.9  | 100    | 63.7906  | 21634 | 34  | 0.014241 | 0        | 0.00072  |
| 76.8  | 70.521 | 64.2935  | 21839 | 47  | 0.000741 | 0        | 8.4E-05  |
| 17.5  | 100    | 130.9727 | 48297 | 63  | 1.45E-05 | 0        | 4.1E-07  |
| 7.6   | 100    | 67.3533  | 22791 | 64  | 1.04E-05 | 0        | 0.001496 |
| 3.5   | 100    | 61.7287  | 20606 | 48  | 0.000311 | 0        | 0.000157 |
| 25.4  | 100    | 22.5282  | 6603  | 37  | 0.009172 | 0        | 0.000638 |
| 52.3  | 73.772 | 44.1248  | 14002 | 72  | 2.75E-06 | 0        | 8.42E-09 |
| 169.1 | 43.489 | 48.1722  | 15498 | 50  | 0.00029  | 0        | 0.000654 |
| 30.1  | 100    | 47.6692  | 15314 | 49  | 0.000376 | 0        | 0.000818 |
| 5.3   | 100    | 135.0439 | 49844 | 31  | 0.032586 | 0        | 0.000286 |
| 10.6  | 100    | 135.0625 | 49852 | 65  | 1.13E-05 | 0        | 3.92E-09 |
| 23.6  | 100    | 113.5407 | 41247 | 77  | 6.76E-07 | 0        | 1.33E-06 |
| 7.8   | 100    | 113.5614 | 41257 | 39  | 0.004052 | 0        | 5.88E-05 |
| 2.3   | 100    | 135.1922 | 52852 | 48  | 0.000592 | 0        | 2.04E-05 |
| 14.7  | 100    | 98.7222  | 37428 | 49  | 0.000552 | 0        | 0.001295 |
| 0.8   | 100    | 96.432   | 36440 | 45  | 0.001379 | 0        | 3.96E-05 |
| 284.7 | 86.078 | 140.6843 | 54240 | 105 | 3.04E-10 | 0        | 7.43E-09 |
| 7.3   | 100    | 116.6207 | 43786 | 33  | 0.01497  | 0        | 0.001324 |

|       |        |          |       |     |          |          |          |
|-------|--------|----------|-------|-----|----------|----------|----------|
| 176.8 | 19.404 | 141.1999 | 54556 | 87  | 6.36E-08 | 0        | 3.76E-09 |
| 3.7   | 47.853 | 141.2065 | 54562 | 77  | 5.45E-07 | 0        | 1.18E-06 |
| 38.1  | 100    | 57.621   | 23045 | 48  | 0.00064  | 0        | 0.000551 |
| 100.6 | 79.246 | 141.0004 | 54431 | 69  | 4.46E-06 | 0        | 4.53E-08 |
| 209.8 | 100    | 43.9643  | 13942 | 23  | 0.205965 | 0.000141 | 0.001589 |
| 2.1   | 100    | 85.7928  | 30012 | 52  | 9.57E-05 | 0.000141 | 0.00171  |
| 5.3   | 100    | 130.47   | 48103 | 27  | 0.064437 | 0.000141 | 0.001754 |
| 1.4   | 100    | 135.5697 | 50058 | 29  | 0.049979 | 0.000273 | 0.002055 |
| 2.6   | 100    | 135.1222 | 52823 | 26  | 0.084698 | 0.001022 | 0.005525 |
| 15.2  | 100    | 71.8618  | 24965 | 40  | 0.003202 | 0.001114 | 0.006024 |
| 9.1   | 100    | 71.9386  | 24997 | 33  | 0.018025 | 0.001576 | 0.008295 |
| 11.2  | 100    | 52.356   | 20781 | 43  | 0.001336 | 0.001945 | 0.01023  |
| 18.8  | 100    | 47.5924  | 15304 | 19  | 0.419458 | 0.002777 | 0.01786  |
| 75.3  | 100    | 60.0492  | 20144 | 41  | 0.000851 | 0.00337  | 0.02234  |
| 18.3  | 100    | 58.1478  | 21313 | 25  | 0.114268 | 0.003736 | 0.02723  |
| 20.7  | 100    | 67.2303  | 22747 | 15  | 1.246425 | 0.004124 | 0.02977  |
| 5.5   | 100    | 43.9452  | 13936 | 36  | 0.01087  | 0.004192 | 0.03001  |
| 0.5   | 100    | 134.5602 | 49653 | 15  | 1.17411  | 0.005271 | 0.03597  |
| 30.7  | 100    | 58.2481  | 21347 | 16  | 0.964949 | 0.00573  | 0.04036  |
| 12.8  | 100    | 140.3059 | 51889 | 65  | 1.22E-05 | 0        | 1.75E-07 |
| 6.6   | 100    | 140.2949 | 51884 | 94  | 1.57E-08 | 0        | 1.53E-09 |
| 0     | 100    | 140.058  | 51784 | 89  | 1.71E-08 | 0        | 1.27E-08 |
| 0     | 100    | 140.0402 | 51777 | 40  | 0.001903 | 0        | 0.000163 |
| 7.6   | 100    | 135.4507 | 50235 | 102 | 2.6E-09  | 0        | 1.63E-09 |
| 0.5   | 100    | 134.9487 | 50067 | 79  | 5.24E-07 | 0        | 3.68E-08 |
| 0.8   | 100    | 140.0643 | 57261 | 101 | 1.25E-09 | 0        | 4.17E-11 |
| 8.8   | 100    | 136.9287 | 50622 | 39  | 0.006067 | 0        | 0.000827 |
| 41.7  | 100    | 137.4301 | 50843 | 69  | 5.77E-06 | 0        | 8.75E-08 |
| 35.9  | 100    | 96.5513  | 34361 | 39  | 0.005646 | 0        | 2.67E-05 |
| 6.4   | 100    | 74.8865  | 25763 | 27  | 0.084902 | 0        | 0.000261 |
| 25.3  | 77.835 | 119.6132 | 46279 | 89  | 5.73E-08 | 0        | 1.52E-06 |
| 109.4 | 51.521 | 98.6049  | 37375 | 61  | 2.78E-05 | 0        | 0.000989 |
| 36.7  | 100    | 140.5463 | 52294 | 42  | 0.002825 | 0        | 6.61E-05 |
| 7.9   | 100    | 89.027   | 33873 | 39  | 0.00408  | 0        | 0.001438 |
| 30.9  | 100    | 74.373   | 27876 | 42  | 0.001584 | 0        | 0.00011  |
| 28.9  | 100    | 48.6539  | 19171 | 36  | 0.006066 | 0        | 0.000588 |
| 84.9  | 12.871 | 42.285   | 16424 | 64  | 1.58E-05 | 0        | 5.7E-06  |
| 37.9  | 50.594 | 82.2976  | 29425 | 52  | 0.00021  | 0        | 0.000501 |
| 31.9  | 50.244 | 80.167   | 28536 | 43  | 0.0023   | 0        | 6.99E-06 |
| 180.5 | 57.295 | 75.7077  | 30800 | 41  | 0.003281 | 0        | 5.75E-05 |
| 0     | 100    | 73.1705  | 29742 | 68  | 5.33E-06 | 0        | 6.56E-05 |
| 6.2   | 100    | 74.4874  | 30300 | 60  | 3.61E-05 | 0        | 1.14E-07 |
| 203.1 | 100    | 19.5734  | 6880  | 39  | 0.002118 | 0        | 2.96E-05 |
| 16.8  | 100    | 82.7991  | 29631 | 46  | 0.000887 | 0.000141 | 0.00157  |
| 16.1  | 100    | 96.8756  | 34483 | 19  | 0.56323  | 0.000273 | 0.00189  |
| 2.3   | 100    | 74.205   | 27801 | 44  | 0.000989 | 0.000525 | 0.00227  |
| 1.7   | 100    | 134.8749 | 51634 | 37  | 0.008346 | 0.000525 | 0.002487 |
| 39.7  | 100    | 52.5486  | 19680 | 43  | 0.000293 | 0.000525 | 0.002616 |
| 4.5   | 100    | 74.4201  | 30274 | 20  | 0.384501 | 0.000525 | 0.002342 |
| 6.4   | 100    | 74.6915  | 28000 | 36  | 0.0071   | 0.000868 | 0.003374 |
| 16.8  | 100    | 83.3045  | 29825 | 39  | 0.004486 | 0.000951 | 0.0044   |
| 22    | 100    | 75.4185  | 28316 | 26  | 0.063983 | 0.001022 | 0.005549 |

|       |        |          |       |    |          |          |          |
|-------|--------|----------|-------|----|----------|----------|----------|
| 1.1   | 100    | 135.5368 | 50266 | 30 | 0.040373 | 0.001022 | 0.005499 |
| 14.1  | 100    | 42.0221  | 16307 | 38 | 0.007815 | 0.001114 | 0.006298 |
| 30.1  | 100    | 67.0601  | 23001 | 15 | 1.467149 | 0.00121  | 0.006744 |
| 64.9  | 100    | 79.6625  | 28319 | 6  | 11.70361 | 0.002257 | 0.0125   |
| 110.5 | 99.946 | 54.2942  | 21616 | 36 | 0.004832 | 0.002376 | 0.01522  |
| 50.4  | 100    | 46.4809  | 16162 | 15 | 0.274184 | 0.002376 | 0.01477  |
| 0     | 100    | 110.7807 | 43030 | 35 | 0.011549 | 0.002719 | 0.01646  |
| 7     | 100    | 74.1776  | 27789 | 26 | 0.060945 | 0.002777 | 0.01734  |
| 6.4   | 100    | 89.3866  | 34031 | 25 | 0.103637 | 0.002777 | 0.01794  |
| 4.9   | 100    | 97.0579  | 34557 | 8  | 5.802223 | 0.003674 | 0.02577  |
| 13.3  | 100    | 83.8121  | 30025 | 26 | 0.074509 | 0.003967 | 0.02869  |
| 33    | 100    | 37.5907  | 11662 | 26 | 0.003821 | 0.004424 | 0.03172  |
| 45.5  | 100    | 54.8003  | 21835 | 35 | 0.006474 | 0.004581 | 0.03253  |
| 11    | 100    | 79.707   | 28340 | 6  | 13.17151 | 0.007057 | 0.05223  |
| 2.2   | 100    | 92.9987  | 34743 | 33 | 0.014081 | 0        | 0.001475 |
| 9.8   | 100    | 80.2526  | 29785 | 53 | 0.000183 | 0        | 0.000142 |
| 33    | 100    | 80.7586  | 29986 | 56 | 9.68E-05 | 0        | 1.27E-05 |
| 9.5   | 100    | 79.3926  | 32345 | 51 | 0.000255 | 0        | 0.000139 |
| 0     | 100    | 93.4793  | 38300 | 36 | 0.00582  | 0        | 0.000748 |
| 0     | 100    | 92.9762  | 38069 | 62 | 1.79E-05 | 0        | 8.93E-06 |
| 3     | 100    | 128.8482 | 47437 | 41 | 0.003995 | 0        | 0.000111 |
| 18.9  | 100    | 98.5179  | 37335 | 45 | 0.000574 | 0        | 8.22E-06 |
| 17.4  | 100    | 113.6553 | 43757 | 84 | 7.34E-08 | 0        | 1.71E-09 |
| 34.5  | 100    | 55.747   | 20320 | 46 | 0.001047 | 0        | 1.01E-05 |
| 32.7  | 52.3   | 55.2351  | 20115 | 47 | 0.000899 | 0        | 1.65E-05 |
| 32.2  | 100    | 14.75    | 4432  | 55 | 0.000124 | 0        | 0.000201 |
| 34.6  | 48.992 | 102.0753 | 37702 | 69 | 4.39E-06 | 0        | 3.48E-06 |
| 114   | 100    | 16.7179  | 5439  | 32 | 0.015876 | 0        | 0.001167 |
| 14.5  | 100    | 76.1541  | 28628 | 64 | 1.36E-06 | 0        | 5.77E-07 |
| 12.5  | 100    | 89.6274  | 34226 | 75 | 9E-08    | 0        | 1.7E-07  |
| 7.5   | 100    | 90.038   | 34380 | 45 | 0.000108 | 0        | 5.38E-05 |
| 4.2   | 100    | 90.6337  | 34622 | 51 | 2.62E-05 | 0        | 3.88E-05 |
| 22.6  | 89.454 | 90.1295  | 34416 | 60 | 3.56E-06 | 0        | 1.09E-06 |
| 4.4   | 100    | 82.8524  | 30577 | 78 | 8.11E-09 | 0        | 1.8E-07  |
| 51    | 94.401 | 82.3479  | 30386 | 87 | 9.88E-10 | 0        | 4.07E-09 |
| 8.8   | 100    | 82.2989  | 30366 | 40 | 4.83E-05 | 0        | 0.000493 |
| 7.6   | 100    | 82.1889  | 30326 | 53 | 2.4E-06  | 0        | 4.87E-05 |
| 76.4  | 10.114 | 140.817  | 54319 | 77 | 8.98E-07 | 0        | 7.65E-11 |
| 66.8  | 63.818 | 81.8435  | 30186 | 84 | 2.05E-09 | 0        | 1.54E-09 |
| 3.4   | 100    | 79.5449  | 29236 | 59 | 2.39E-07 | 0        | 7.02E-05 |
| 14.5  | 100    | 81.7922  | 30163 | 36 | 0.000144 | 0        | 0.000932 |
| 4.7   | 100    | 81.6864  | 30119 | 41 | 3.78E-05 | 0        | 0.000309 |
| 10.8  | 100    | 81.3389  | 29980 | 68 | 7.59E-08 | 0        | 6.9E-07  |
| 23.4  | 100    | 81.2459  | 29940 | 72 | 3.3E-08  | 0        | 1.98E-08 |
| 61.6  | 100    | 21.8631  | 7900  | 37 | 0.00728  | 0        | 0.000869 |
| 4.5   | 100    | 119.1545 | 44890 | 39 | 0.003207 | 0.000525 | 0.002516 |
| 7     | 100    | 93.442   | 34009 | 26 | 0.054419 | 0.000758 | 0.002859 |
| 20.8  | 100    | 21.9291  | 6991  | 43 | 0.001904 | 0.000868 | 0.003308 |
| 16.2  | 100    | 101.578  | 37472 | 36 | 0.008085 | 0.000868 | 0.00358  |
| 74.4  | 100    | 57.7138  | 20668 | 26 | 0.034925 | 0.000951 | 0.004092 |
| 79.8  | 60.045 | 102.0854 | 37707 | 42 | 0.001957 | 0.000951 | 0.00386  |
| 98.6  | 31.724 | 72.1791  | 26744 | 48 | 0.000548 | 0.000951 | 0.003822 |



|       |        |          |       |    |          |          |          |
|-------|--------|----------|-------|----|----------|----------|----------|
| 1.3   | 100    | 80.7384  | 29709 | 21 | 0.004168 | 0.000951 | 0.004032 |
| 2     | 100    | 118.6527 | 44664 | 34 | 0.010943 | 0.000951 | 0.003925 |
| 91.9  | 100    | 14.9799  | 4340  | 15 | 1.158006 | 0.00141  | 0.007234 |
| 0.8   | 100    | 79.0408  | 29042 | 29 | 0.000231 | 0.001945 | 0.01007  |
| 70.8  | 27.193 | 57.2429  | 19059 | 36 | 0.006005 | 0.002315 | 0.01342  |
| 3.7   | 100    | 120.4214 | 44100 | 26 | 0.081996 | 0.002843 | 0.01898  |
| 1.7   | 100    | 113.1506 | 43540 | 18 | 0.302478 | 0.003674 | 0.02645  |
| 36.2  | 100    | 71.6786  | 26552 | 32 | 0.026264 | 0.0085   | 0.06343  |
| 59.5  | 100    | 43.2574  | 14947 | 23 | 0.019871 | 0        | 0.001199 |
| 0     | 100    | 133.5748 | 49564 | 37 | 0.007685 | 0        | 0.000677 |
| 2     | 100    | 119.5644 | 49121 | 93 | 2.48E-08 | 0        | 2.47E-09 |
| 5     | 100    | 133.6109 | 54831 | 63 | 2.06E-05 | 0        | 1.88E-06 |
| 29.2  | 100    | 65.1926  | 22208 | 53 | 9.92E-05 | 0        | 2.56E-05 |
| 13.1  | 100    | 65.435   | 22317 | 50 | 0.000208 | 0        | 1.14E-05 |
| 68.5  | 46.259 | 65.6941  | 22427 | 58 | 3.85E-05 | 0        | 4.7E-07  |
| 25    | 100    | 79.8938  | 27708 | 37 | 0.007085 | 0        | 0.000246 |
| 82.8  | 45.139 | 79.9828  | 27743 | 49 | 0.000591 | 0        | 0.000175 |
| 41.3  | 54.612 | 116.6374 | 45054 | 74 | 7.38E-07 | 0        | 9.81E-06 |
| 17.7  | 100    | 113.8774 | 42595 | 61 | 2.88E-05 | 0        | 0.00034  |
| 7.1   | 100    | 111.6716 | 41647 | 50 | 0.000446 | 0        | 3.58E-07 |
| 5     | 100    | 119.3246 | 44953 | 48 | 0.000579 | 0        | 7.75E-06 |
| 39.2  | 67.704 | 116.3585 | 43664 | 29 | 0.047744 | 0        | 0.0007   |
| 416.7 | 100    | 140.7434 | 54273 | 85 | 1.38E-07 | 0        | 1.27E-10 |
| 4     | 100    | 91.8218  | 33340 | 39 | 0.005168 | 0        | 3.53E-05 |
| 3.5   | 100    | 91.8158  | 33337 | 42 | 0.00235  | 0        | 1.05E-06 |
| 25    | 100    | 72.7342  | 25318 | 22 | 0.215379 | 0.000273 | 0.001892 |
| 11.1  | 100    | 70.5561  | 24043 | 35 | 0.00705  | 0.000525 | 0.002364 |
| 7.8   | 100    | 91.314   | 33134 | 22 | 0.268159 | 0.000525 | 0.00234  |
| 2.5   | 100    | 133.5361 | 49550 | 37 | 0.008519 | 0.00065  | 0.002746 |
| 24.5  | 100    | 99.7349  | 36681 | 26 | 0.122658 | 0.000951 | 0.004377 |
| 1.8   | 100    | 120.068  | 49331 | 26 | 0.117267 | 0.000951 | 0.003833 |
| 22.8  | 100    | 73.2394  | 25526 | 17 | 0.678225 | 0.000951 | 0.00389  |
| 28.4  | 100    | 78.8172  | 29230 | 41 | 0.003338 | 0.001022 | 0.005295 |
| 4.3   | 100    | 85.6491  | 29955 | 22 | 0.129269 | 0.001758 | 0.009079 |
| 29.3  | 100    | 58.1231  | 19271 | 21 | 0.079146 | 0.002543 | 0.01578  |
| 157.4 | 54.119 | 32.1923  | 9869  | 35 | 0.005689 | 0.003096 | 0.01973  |
| 0     | 100    | 133.6281 | 54838 | 17 | 0.809097 | 0.003254 | 0.02122  |
| 26.3  | 100    | 80.2496  | 27848 | 33 | 0.018535 | 0.00337  | 0.02392  |
| 3.2   | 100    | 87.159   | 30593 | 24 | 0.180936 | 0.00337  | 0.02218  |
| 15.3  | 100    | 20.0471  | 6280  | 42 | 0.000588 | 0.003736 | 0.0278   |
| 65.7  | 100    | 58.169   | 19289 | 17 | 0.211985 | 0.006145 | 0.04574  |
| 16.5  | 100    | 79.8819  | 27703 | 24 | 0.177534 | 0.008034 | 0.05915  |
| 8.2   | 100    | 56.7004  | 20243 | 16 | 0.255496 | 0.008361 | 0.06249  |
| 3.6   | 100    | 20.136   | 5923  | 35 | 0.002309 | 0.008962 | 0.06771  |
| 45.9  | 100    | 44.4942  | 15967 | 5  | 1.733213 | 0        | 0.000141 |
| 31.4  | 100    | 45.5032  | 16354 | 21 | 0.04374  | 0        | 0.000232 |
| 12.3  | 100    | 45.017   | 16176 | 26 | 0.014369 | 0        | 0.000764 |
| 97.1  | 89.648 | 44.9991  | 16170 | 28 | 0.008921 | 0        | 4.76E-08 |
| 66    | 100    | 38.9207  | 13871 | 32 | 0.019277 | 0        | 3.74E-05 |
| 33.8  | 100    | 38.8946  | 13859 | 29 | 0.038494 | 0        | 3.05E-05 |
| 13.6  | 100    | 71.0976  | 24649 | 49 | 0.000377 | 0        | 0.001359 |
| 17.8  | 100    | 87.0015  | 30528 | 87 | 7.99E-08 | 0        | 8.21E-09 |

|       |        |          |       |    |          |          |          |
|-------|--------|----------|-------|----|----------|----------|----------|
| 4.4   | 100    | 87.5061  | 30733 | 44 | 0.001569 | 0        | 0.000133 |
| 3.5   | 100    | 118.0773 | 45632 | 37 | 0.008449 | 0        | 0.000297 |
| 31.2  | 82.838 | 106.9309 | 41474 | 68 | 4.79E-07 | 0        | 3.34E-06 |
| 17.5  | 100    | 106.929  | 41473 | 89 | 3.95E-09 | 0        | 4.7E-08  |
| 100.5 | 18.423 | 30.4591  | 11492 | 33 | 0.018889 | 0        | 0.000387 |
| 18.8  | 100    | 19.841   | 5833  | 29 | 0.055112 | 0.000141 | 0.001637 |
| 18.7  | 100    | 44.6262  | 16022 | 25 | 0.014101 | 0.000273 | 0.001823 |
| 19.1  | 60.306 | 57.936   | 23172 | 7  | 7.146631 | 0.000868 | 0.003567 |
| 6.3   | 100    | 56.5977  | 22602 | 48 | 0.000634 | 0.001022 | 0.005037 |
| 2.1   | 100    | 106.4156 | 41252 | 30 | 0.002531 | 0.001022 | 0.004952 |
| 308.6 | 39.884 | 17.5833  | 5904  | 27 | 0.063994 | 0.001114 | 0.006417 |
| 11.6  | 100    | 38.4097  | 13676 | 12 | 2.286729 | 0.001114 | 0.006057 |
| 53.9  | 100    | 85.7489  | 31990 | 37 | 0.003103 | 0.00121  | 0.006807 |
| 22.8  | 100    | 36.561   | 13010 | 25 | 0.040925 | 0.001308 | 0.006904 |
| 22.8  | 100    | 36.561   | 13010 | 25 | 0.040925 | 0.001308 | 0.006904 |
| 108   | 21.072 | 81.9666  | 29295 | 37 | 0.004661 | 0.001576 | 0.008203 |
| 10.5  | 100    | 62.1051  | 22854 | 28 | 0.044173 | 0.001758 | 0.009416 |
| 179.6 | 23.173 | 42.6865  | 16599 | 49 | 0.000238 | 0.001758 | 0.009628 |
| 36.9  | 100    | 52.1214  | 18435 | 20 | 0.334868 | 0.002079 | 0.01168  |
| 0     | 100    | 135.9996 | 53192 | 25 | 0.136451 | 0.002777 | 0.01747  |
| 0     | 100    | 84.9018  | 34603 | 12 | 0.290569 | 0.002931 | 0.01954  |
| 12.9  | 100    | 62.5213  | 23023 | 30 | 0.031778 | 0.003892 | 0.02855  |
| 9.7   | 100    | 58.4838  | 23402 | 18 | 0.559047 | 0.003967 | 0.02871  |
| 10.8  | 100    | 18.8416  | 6541  | 37 | 0.008366 | 0.004192 | 0.03054  |
| 0.5   | 100    | 107.4663 | 41705 | 14 | 0.105035 | 0.005325 | 0.03665  |
| 1.7   | 100    | 136.743  | 53507 | 20 | 0.473645 | 0.005618 | 0.0383   |
| 0     | 100    | 136.5075 | 53404 | 16 | 1.085149 | 0.006926 | 0.05034  |
| 13.7  | 100    | 46.9187  | 16902 | 7  | 1.2922   | 0.007423 | 0.05389  |
| 23.6  | 100    | 17.6883  | 5962  | 23 | 0.182133 | 0.009514 | 0.0752   |
| 32.3  | 100    | 98.6182  | 36974 | 48 | 0.000363 | 0        | 0.000309 |
| 5     | 100    | 98.153   | 36798 | 49 | 0.000344 | 0        | 0.00061  |
| 22.5  | 100    | 63.1842  | 23205 | 55 | 4.75E-05 | 0        | 0.001491 |
| 32.7  | 73.091 | 65.0074  | 23896 | 66 | 9.96E-06 | 0        | 1.02E-06 |
| 3.6   | 100    | 64.6849  | 23778 | 49 | 0.000503 | 0        | 0.000472 |
| 19    | 100    | 23.1456  | 7452  | 15 | 1.48312  | 0        | 0.001209 |
| 21.5  | 100    | 22.3306  | 7142  | 14 | 1.000981 | 0        | 0.000511 |
| 26.2  | 100    | 21.8247  | 6955  | 8  | 3.93936  | 0        | 0.001418 |
| 52.3  | 100    | 21.5375  | 6845  | 26 | 0.062173 | 0        | 0.000151 |
| 3.4   | 100    | 95.346   | 35980 | 30 | 0.043634 | 0        | 0.000379 |
| 3.8   | 100    | 95.2963  | 35957 | 48 | 0.000629 | 0        | 4.81E-05 |
| 9.5   | 100    | 94.838   | 35768 | 16 | 1.105935 | 0        | 0.001273 |
| 14.7  | 100    | 74.8292  | 27832 | 58 | 7.02E-05 | 0        | 4.17E-07 |
| 12.1  | 43.998 | 75.331   | 28034 | 62 | 2.55E-05 | 0        | 2.59E-08 |
| 47.2  | 100    | 140.9834 | 54421 | 13 | 1.353309 | 0        | 0.000547 |
| 30.7  | 100    | 22.8356  | 7327  | 7  | 5.746795 | 0.000141 | 0.001655 |
| 15.9  | 100    | 60.567   | 24295 | 52 | 0.000142 | 0.000273 | 0.002062 |
| 8.2   | 100    | 74.0155  | 27727 | 26 | 0.081847 | 0.000758 | 0.003074 |
| 3.8   | 100    | 102.6506 | 36772 | 39 | 0.004128 | 0.000758 | 0.003227 |
| 33.4  | 100    | 45.9885  | 18027 | 29 | 0.029185 | 0.000951 | 0.004174 |
| 62.9  | 100    | 16.3068  | 5252  | 38 | 0.00316  | 0.001022 | 0.005717 |
| 17.1  | 100    | 60.3598  | 22116 | 10 | 1.855954 | 0.001022 | 0.004615 |
| 69.9  | 100    | 38.0014  | 13029 | 36 | 0.005763 | 0.001022 | 0.004621 |

|       |        |          |       |    |          |          |          |
|-------|--------|----------|-------|----|----------|----------|----------|
| 19    | 100    | 20.9613  | 6627  | 17 | 0.686245 | 0.00121  | 0.006445 |
| 19    | 100    | 20.9613  | 6627  | 17 | 0.686245 | 0.00121  | 0.006445 |
| 35.6  | 100    | 62.2382  | 22485 | 40 | 0.00163  | 0.001498 | 0.007902 |
| 35.1  | 100    | 26.0235  | 8531  | 20 | 0.399428 | 0.001576 | 0.008594 |
| 73.9  | 100    | 17.7437  | 5012  | 26 | 0.0916   | 0.001576 | 0.008511 |
| 112.7 | 100    | 27.3614  | 8227  | 18 | 0.649618 | 0.001576 | 0.008691 |
| 63.3  | 100    | 31.7236  | 10726 | 47 | 0.000397 | 0.001945 | 0.009995 |
| 251.7 | 100    | 27.8664  | 8394  | 20 | 0.43246  | 0.002012 | 0.01093  |
| 26.8  | 100    | 26.8733  | 8090  | 19 | 0.51398  | 0.002079 | 0.01143  |
| 211.5 | 61.905 | 16.2962  | 5247  | 28 | 0.035174 | 0.002315 | 0.01304  |
| 6.1   | 100    | 56.9159  | 20841 | 46 | 0.000256 | 0.002543 | 0.01615  |
| 24.9  | 100    | 98.1139  | 36784 | 27 | 0.049185 | 0.002843 | 0.01931  |
| 104.4 | 100    | 26.8828  | 8566  | 21 | 0.176647 | 0.00337  | 0.02245  |
| 43.6  | 100    | 37.4972  | 12841 | 31 | 0.018178 | 0.004643 | 0.03276  |
| 2.3   | 100    | 96.0309  | 34138 | 11 | 3.031713 | 0.004643 | 0.03306  |
| 2     | 100    | 95.5241  | 33937 | 6  | 8.640889 | 0.004643 | 0.03371  |
| 145.3 | 15.049 | 70.6037  | 26123 | 59 | 4.69E-05 | 0        | 0.000172 |
| 74.3  | 100    | 70.65    | 26143 | 48 | 0.000633 | 0        | 0.000189 |
| 75.1  | 100    | 21.6228  | 6880  | 28 | 0.02909  | 0        | 0.001394 |
| 111.8 | 100    | 40.0464  | 13787 | 34 | 0.008659 | 0        | 0.000181 |
| 28.9  | 100    | 39.0986  | 13443 | 37 | 0.008801 | 0        | 7.08E-07 |
| 2.7   | 100    | 38.9946  | 13403 | 45 | 0.001584 | 0        | 5.42E-05 |
| 72.8  | 100    | 38.9719  | 13393 | 40 | 0.004634 | 0        | 5.32E-08 |
| 18.1  | 100    | 38.5949  | 13257 | 25 | 0.145784 | 0        | 4.74E-05 |
| 26.7  | 100    | 38.4684  | 13209 | 38 | 0.007115 | 0        | 1.53E-06 |
| 111.7 | 100    | 37.9841  | 13022 | 28 | 0.07778  | 0        | 1.48E-06 |
| 9.9   | 100    | 37.982   | 13021 | 48 | 0.00077  | 0        | 3.07E-07 |
| 42.2  | 45.23  | 37.9645  | 13015 | 46 | 0.0011   | 0        | 2.15E-09 |
| 20.9  | 100    | 37.4816  | 12835 | 12 | 3.244231 | 0        | 0.000786 |
| 70    | 100    | 37.4641  | 12828 | 7  | 10.33994 | 0        | 0.000945 |
| 71.2  | 34.239 | 76.9241  | 27108 | 39 | 0.003605 | 0        | 0.001347 |
| 15.6  | 100    | 50.8563  | 18455 | 45 | 0.001051 | 0        | 0.00075  |
| 140.8 | 49.229 | 140.5997 | 55272 | 91 | 2.36E-08 | 0        | 3.04E-11 |
| 23.1  | 100    | 43.4479  | 13757 | 52 | 0.000135 | 0        | 3.15E-05 |
| 154   | 100    | 43.4385  | 13753 | 27 | 0.047019 | 0        | 0.00021  |
| 87.1  | 57.767 | 42.9406  | 13572 | 51 | 0.000171 | 0        | 5.54E-06 |
| 17.1  | 100    | 42.567   | 13434 | 30 | 0.04933  | 0        | 0.000107 |
| 26.7  | 25.774 | 89.4663  | 34064 | 72 | 2.06E-06 | 0        | 2.91E-08 |
| 64.3  | 15.545 | 85.5916  | 32362 | 57 | 6.35E-05 | 0        | 0.001166 |
| 160.1 | 100    | 125.0127 | 47417 | 7  | 8.363072 | 0        | 0.000514 |
| 58.9  | 57.168 | 129.6008 | 49382 | 67 | 5.94E-06 | 0        | 7.3E-05  |
| 16.4  | 100    | 70.9311  | 26153 | 71 | 1.76E-06 | 0        | 0.000159 |
| 26.7  | 55.744 | 50.2348  | 19857 | 58 | 5.34E-05 | 0        | 2.91E-05 |
| 55.8  | 37.731 | 86.4083  | 31120 | 54 | 0.000182 | 0        | 3.95E-06 |
| 117.1 | 6.816  | 42.2006  | 16384 | 47 | 0.000643 | 0        | 0.001145 |
| 108   | 100    | 42.4963  | 16515 | 41 | 0.002469 | 0        | 0.001128 |
| 22    | 100    | 66.6142  | 26883 | 67 | 8.51E-06 | 0        | 0.000477 |
| 10.3  | 100    | 78.2111  | 27682 | 42 | 0.00292  | 0        | 0.001265 |
| 13.3  | 100    | 85.8971  | 30901 | 37 | 0.008393 | 0.000141 | 0.00163  |
| 8.2   | 100    | 86.5915  | 32804 | 56 | 6.99E-05 | 0.000273 | 0.001916 |
| 2.5   | 66.174 | 125.5146 | 47631 | 31 | 0.030512 | 0.000525 | 0.002568 |
| 196.3 | 100    | 24.5017  | 8427  | 29 | 0.041035 | 0.000525 | 0.002503 |

|       |        |          |       |    |          |          |          |
|-------|--------|----------|-------|----|----------|----------|----------|
| 219.9 | 42.251 | 99.9243  | 36769 | 63 | 5.58E-06 | 0.000525 | 0.002303 |
| 16.3  | 100    | 129.0964 | 49164 | 37 | 0.005352 | 0.000951 | 0.004494 |
| 8.6   | 100    | 68.2393  | 24907 | 41 | 0.002918 | 0.000951 | 0.003975 |
| 62.3  | 100    | 42.4028  | 13376 | 10 | 2.26719  | 0.000951 | 0.004578 |
| 42.5  | 100    | 70.4191  | 25930 | 50 | 0.000213 | 0.000951 | 0.004154 |
| 48.1  | 100    | 24.1931  | 7156  | 29 | 0.020833 | 0.001022 | 0.005011 |
| 11.8  | 100    | 89.0452  | 33882 | 23 | 0.093641 | 0.001022 | 0.004636 |
| 40.5  | 100    | 73.8156  | 25778 | 47 | 0.0003   | 0.001022 | 0.005309 |
| 18    | 100    | 99.4189  | 36534 | 39 | 0.001375 | 0.001114 | 0.006224 |
| 73.6  | 100    | 41.8624  | 16232 | 37 | 0.006892 | 0.00121  | 0.006694 |
| 173.5 | 25.526 | 42.9332  | 13569 | 12 | 1.597673 | 0.00141  | 0.007383 |
| 15.3  | 100    | 72.7692  | 26924 | 42 | 0.00208  | 0.00141  | 0.007458 |
| 15.8  | 88.833 | 140.6445 | 55296 | 31 | 0.014934 | 0.001576 | 0.008714 |
| 11.9  | 100    | 94.4815  | 33546 | 36 | 0.003084 | 0.001758 | 0.009433 |
| 6.2   | 100    | 70.1447  | 25929 | 31 | 0.025686 | 0.001758 | 0.009039 |
| 9.6   | 40.098 | 129.5774 | 49372 | 36 | 0.007136 | 0.001758 | 0.009235 |
| 10.4  | 100    | 128.7962 | 49033 | 50 | 0.000408 | 0.002012 | 0.0108   |
| 15.8  | 100    | 35.7378  | 11018 | 14 | 1.858283 | 0.002079 | 0.01164  |
| 5.2   | 100    | 89.2819  | 31470 | 53 | 6.22E-05 | 0.002079 | 0.0116   |
| 4.6   | 100    | 41.932   | 16264 | 30 | 0.031445 | 0.002257 | 0.01276  |
| 24.8  | 100    | 45.3149  | 16168 | 21 | 0.137612 | 0.002543 | 0.01604  |
| 13.4  | 100    | 50.3564  | 19907 | 26 | 0.097649 | 0.002843 | 0.01871  |
| 24.1  | 100    | 25.2196  | 8685  | 31 | 0.015588 | 0.002931 | 0.01949  |
| 326.6 | 95.032 | 55.1629  | 18125 | 41 | 0.001276 | 0.003967 | 0.02882  |
| 65.6  | 100    | 83.7313  | 29992 | 35 | 0.010231 | 0.004266 | 0.03077  |
| 224.3 | 14.676 | 55.2742  | 18173 | 43 | 0.000676 | 0.005325 | 0.03649  |
| 43.3  | 100    | 70.3671  | 25910 | 30 | 0.020215 | 0.005478 | 0.03775  |
| 14.8  | 100    | 85.0821  | 32143 | 32 | 0.025009 | 0.005687 | 0.03985  |
| 11.3  | 100    | 85.6444  | 32384 | 29 | 0.053694 | 0.005687 | 0.03976  |
| 21    | 100    | 37.3478  | 11580 | 10 | 2.235403 | 0.006926 | 0.05048  |
| 78.2  | 100    | 21.6517  | 6891  | 16 | 0.406733 | 0.007572 | 0.05445  |
| 85    | 100    | 84.2416  | 30202 | 31 | 0.027356 | 0.0085   | 0.06404  |
| 19.5  | 100    | 42.4391  | 13390 | 11 | 1.643126 | 0.008997 | 0.06835  |
| 29    | 100    | 66.9279  | 24645 | 95 | 1.31E-08 | 0        | 1.78E-08 |
| 14.6  | 100    | 66.7391  | 24575 | 63 | 1.93E-05 | 0        | 1.78E-06 |
| 24.7  | 100    | 53.3313  | 17517 | 23 | 0.234143 | 0        | 0.000599 |
| 98.4  | 100    | 53.7619  | 17675 | 27 | 0.09727  | 0        | 3.78E-07 |
| 52.3  | 100    | 53.8862  | 17722 | 19 | 0.484682 | 0        | 1.42E-05 |
| 12.7  | 100    | 46.6784  | 14951 | 56 | 8.13E-05 | 0        | 1.77E-06 |
| 31    | 100    | 46.7231  | 14970 | 45 | 0.001079 | 0        | 6.96E-06 |
| 3.3   | 100    | 115.9879 | 43425 | 39 | 0.000133 | 0        | 8.67E-05 |
| 16.4  | 100    | 24.1513  | 8285  | 68 | 4.98E-06 | 0        | 9.76E-05 |
| 152.1 | 65.445 | 21.7086  | 7321  | 34 | 0.013374 | 0        | 0.000647 |
| 26.9  | 100    | 50.8921  | 16511 | 25 | 0.117446 | 0        | 0.00046  |
| 3     | 100    | 16.8622  | 4819  | 70 | 1.94E-06 | 0        | 6.28E-05 |
| 74.3  | 100    | 47.6715  | 16634 | 47 | 0.000656 | 0        | 0.000828 |
| 9.3   | 100    | 75.9457  | 28291 | 52 | 0.000123 | 0        | 0.00088  |
| 10.6  | 100    | 68.767   | 25240 | 38 | 0.001315 | 0        | 0.000616 |
| 25.6  | 100    | 68.694   | 25212 | 37 | 0.001604 | 0        | 0.000701 |
| 26.3  | 62.246 | 71.5117  | 26398 | 61 | 1.3E-06  | 0        | 2.89E-09 |
| 32.7  | 100    | 41.8804  | 16241 | 44 | 0.001258 | 0        | 0.000383 |
| 35.5  | 100    | 41.3683  | 16016 | 38 | 0.005072 | 0        | 0.000279 |

|       |        |          |       |     |          |          |          |
|-------|--------|----------|-------|-----|----------|----------|----------|
| 45.6  | 100    | 123.636  | 43737 | 76  | 1.21E-07 | 0        | 9.48E-08 |
| 10.4  | 98.349 | 123.7251 | 43769 | 53  | 2.53E-05 | 0        | 4.55E-05 |
| 49.7  | 73.349 | 124.1378 | 43888 | 79  | 6.21E-08 | 0        | 2.83E-08 |
| 14.8  | 76.209 | 124.2279 | 43918 | 53  | 2.52E-05 | 0        | 2.88E-05 |
| 23.6  | 100    | 124.6395 | 44044 | 76  | 1.08E-07 | 0        | 6.06E-09 |
| 3.7   | 100    | 123.2211 | 43609 | 41  | 0.000323 | 0        | 0.000182 |
| 15.6  | 100    | 68.2699  | 24973 | 35  | 0.001391 | 0        | 0.000553 |
| 141.2 | 100    | 41.1613  | 14206 | 42  | 0.000193 | 0.000141 | 0.001748 |
| 12.5  | 100    | 67.428   | 24832 | 33  | 0.018952 | 0.000141 | 0.001767 |
| 2.7   | 100    | 115.3367 | 43206 | 27  | 0.00251  | 0.000141 | 0.00167  |
| 30.3  | 100    | 58.2782  | 21866 | 54  | 6.67E-05 | 0.000273 | 0.002028 |
| 2.3   | 100    | 123.132  | 43577 | 40  | 0.000507 | 0.000273 | 0.002007 |
| 4.8   | 100    | 130.2534 | 48016 | 36  | 0.009637 | 0.000525 | 0.002277 |
| 33.4  | 100    | 50.6276  | 17818 | 22  | 0.045135 | 0.000758 | 0.003033 |
| 55.1  | 75.25  | 47.5436  | 16583 | 39  | 0.003065 | 0.000868 | 0.003535 |
| 120.4 | 100    | 36.1116  | 12297 | 18  | 0.590339 | 0.001022 | 0.00512  |
| 90.2  | 100    | 52.6495  | 19090 | 43  | 0.001273 | 0.001022 | 0.004645 |
| 176.9 | 100    | 17.387   | 5480  | 24  | 0.109571 | 0.001114 | 0.006179 |
| 26.8  | 100    | 23.9196  | 8191  | 28  | 0.04638  | 0.001114 | 0.006362 |
| 5.9   | 100    | 41.3587  | 16012 | 32  | 0.020166 | 0.001576 | 0.008789 |
| 4.3   | 100    | 21.6988  | 7317  | 40  | 0.003786 | 0.001576 | 0.008695 |
| 8.7   | 100    | 62.8618  | 22749 | 35  | 0.009274 | 0.001576 | 0.008359 |
| 73.8  | 81.656 | 121.4063 | 45866 | 35  | 0.006638 | 0.002012 | 0.01122  |
| 44.6  | 100    | 40.6589  | 14016 | 23  | 0.01361  | 0.002257 | 0.0125   |
| 4.3   | 100    | 46.8008  | 14998 | 28  | 0.048903 | 0.002376 | 0.01449  |
| 20.2  | 100    | 62.8716  | 22753 | 21  | 0.236781 | 0.003674 | 0.02598  |
| 20.2  | 100    | 17.0205  | 5301  | 34  | 0.010627 | 0.009141 | 0.0706   |
| 0.8   | 100    | 71.5852  | 26428 | 11  | 0.089931 | 0.009514 | 0.07348  |
| 3.6   | 100    | 100.7838 | 37880 | 31  | 0.03206  | 0        | 0.001152 |
| 29    | 100    | 100.7164 | 37850 | 82  | 2.09E-07 | 0        | 1.1E-08  |
| 4.2   | 100    | 100.2056 | 37637 | 68  | 5.48E-06 | 0        | 5.52E-06 |
| 2.3   | 100    | 99.7018  | 37414 | 45  | 0.001077 | 0        | 0.000743 |
| 7.9   | 100    | 82.3567  | 30605 | 44  | 0.000406 | 0        | 0.000273 |
| 28.5  | 37.158 | 81.8518  | 30418 | 67  | 1.85E-06 | 0        | 2.91E-08 |
| 39.5  | 39.224 | 81.3461  | 30222 | 66  | 2.42E-06 | 0        | 1.93E-08 |
| 5.4   | 100    | 80.8408  | 30020 | 37  | 0.001917 | 0        | 0.000224 |
| 88.5  | 100    | 30.7404  | 10303 | 63  | 1.01E-05 | 0        | 3.18E-07 |
| 6.1   | 100    | 32.9355  | 10066 | 60  | 1.58E-05 | 0        | 0.001261 |
| 2.2   | 100    | 119.9972 | 44858 | 49  | 0.000636 | 0        | 5.97E-05 |
| 1.4   | 100    | 109.9466 | 41265 | 43  | 0.002415 | 0        | 0.000348 |
| 2.8   | 100    | 116.9522 | 43764 | 51  | 0.000422 | 0        | 1.29E-06 |
| 18    | 100    | 119.4787 | 44662 | 65  | 1.62E-05 | 0        | 6.45E-07 |
| 3.4   | 100    | 119.4181 | 44638 | 44  | 0.001874 | 0        | 0.000428 |
| 2.8   | 100    | 119.2188 | 44564 | 54  | 0.000181 | 0        | 1.64E-05 |
| 45.5  | 62.349 | 119.1067 | 44524 | 103 | 2.17E-09 | 0        | 1.48E-10 |
| 23.1  | 71.932 | 118.9746 | 44474 | 61  | 3.95E-05 | 0        | 1.14E-06 |
| 14.6  | 100    | 118.6014 | 44343 | 95  | 1.34E-08 | 0        | 1.2E-09  |
| 14.9  | 100    | 118.4712 | 44298 | 51  | 0.000359 | 0        | 5.62E-06 |
| 1.4   | 100    | 117.9677 | 44129 | 44  | 0.001684 | 0        | 0.000108 |
| 13.9  | 100    | 117.4596 | 43945 | 61  | 3.45E-05 | 0        | 3.5E-07  |
| 13    | 100    | 140.4798 | 51972 | 25  | 0.136961 | 0        | 0.000629 |
| 121.6 | 100    | 140.4217 | 51945 | 101 | 3.62E-09 | 0        | 1.65E-09 |

|       |        |          |       |     |          |   |          |
|-------|--------|----------|-------|-----|----------|---|----------|
| 71.3  | 12.946 | 140.4195 | 51944 | 65  | 1.66E-05 | 0 | 9.94E-07 |
| 1.3   | 100    | 139.6453 | 51642 | 33  | 0.024862 | 0 | 0.000926 |
| 2     | 100    | 132.5193 | 49177 | 38  | 0.008116 | 0 | 0.000804 |
| 4.5   | 100    | 133.54   | 49552 | 43  | 0.002708 | 0 | 4.67E-05 |
| 0.5   | 100    | 138.2414 | 51167 | 41  | 0.004135 | 0 | 0.000394 |
| 1     | 100    | 137.0875 | 50794 | 45  | 0.001483 | 0 | 0.000626 |
| 1.8   | 100    | 136.5578 | 50615 | 37  | 0.00984  | 0 | 0.000591 |
| 4.1   | 100    | 136.0533 | 50442 | 44  | 0.001913 | 0 | 0.0003   |
| 26.2  | 100    | 135.5468 | 50270 | 31  | 0.039162 | 0 | 0.000676 |
| 3.3   | 100    | 135.0455 | 50100 | 59  | 6.31E-05 | 0 | 5.97E-06 |
| 6.5   | 100    | 134.544  | 49928 | 50  | 0.00044  | 0 | 3.5E-05  |
| 6.2   | 100    | 118.6352 | 48725 | 70  | 3.91E-06 | 0 | 9.66E-07 |
| 3.9   | 100    | 118.5964 | 48707 | 32  | 0.03083  | 0 | 0.001208 |
| 14.3  | 77.674 | 118.5777 | 48698 | 112 | 2.51E-10 | 0 | 8.21E-12 |
| 40.5  | 4.367  | 118.5759 | 48697 | 103 | 2.11E-09 | 0 | 1.44E-10 |
| 0.5   | 100    | 118.0916 | 48485 | 38  | 0.006787 | 0 | 0.001152 |
| 12.3  | 100    | 118.6796 | 48745 | 63  | 1.48E-05 | 0 | 3.5E-05  |
| 18.3  | 100    | 118.0668 | 48476 | 89  | 5.76E-08 | 0 | 1.75E-09 |
| 0     | 100    | 116.5895 | 47858 | 40  | 0.004326 | 0 | 0.00046  |
| 11.9  | 100    | 120.5973 | 49546 | 103 | 2.25E-09 | 0 | 1.01E-10 |
| 21.9  | 100    | 120.0905 | 49339 | 103 | 2.42E-09 | 0 | 6.42E-10 |
| 24.9  | 100    | 119.5856 | 49129 | 103 | 2.31E-09 | 0 | 2.37E-10 |
| 4.3   | 100    | 119.1825 | 48965 | 54  | 0.000128 | 0 | 2.11E-05 |
| 36    | 38.074 | 119.08   | 48923 | 107 | 8.58E-10 | 0 | 8.06E-11 |
| 1.8   | 100    | 119.6875 | 49169 | 52  | 0.000257 | 0 | 0.000167 |
| 1.1   | 100    | 108.9445 | 44749 | 39  | 0.004472 | 0 | 0.001172 |
| 2     | 100    | 107.9402 | 44353 | 36  | 0.007843 | 0 | 0.000859 |
| 3.3   | 100    | 106.9222 | 43935 | 36  | 0.007974 | 0 | 0.001016 |
| 6.2   | 100    | 106.4095 | 43720 | 51  | 0.000279 | 0 | 9.87E-05 |
| 7.2   | 100    | 107.4317 | 44153 | 62  | 2.19E-05 | 0 | 1.2E-05  |
| 4.4   | 100    | 109.4512 | 44951 | 58  | 5.05E-05 | 0 | 1.91E-05 |
| 2.6   | 100    | 114.0145 | 46831 | 44  | 0.001317 | 0 | 0.000825 |
| 1.8   | 100    | 113.0848 | 46439 | 69  | 5.23E-06 | 0 | 1.34E-06 |
| 3.5   | 100    | 109.7094 | 45058 | 63  | 2.37E-05 | 0 | 2.03E-05 |
| 4.6   | 100    | 131.2101 | 53815 | 73  | 2.02E-06 | 0 | 7.62E-07 |
| 4     | 100    | 129.0954 | 52970 | 71  | 3.29E-06 | 0 | 2.48E-06 |
| 10.1  | 100    | 131.7289 | 54035 | 43  | 0.002221 | 0 | 0.000196 |
| 1.4   | 100    | 123.1179 | 50573 | 65  | 1.29E-05 | 0 | 2.44E-06 |
| 5.3   | 100    | 122.6146 | 50381 | 108 | 6.49E-10 | 0 | 5.85E-10 |
| 4.3   | 100    | 122.1133 | 50176 | 91  | 3.12E-08 | 0 | 5.98E-08 |
| 6.3   | 100    | 121.6071 | 49959 | 91  | 3.11E-08 | 0 | 2.91E-09 |
| 11.7  | 100    | 121.1033 | 49763 | 99  | 6.01E-09 | 0 | 8.8E-10  |
| 5.1   | 100    | 121.0587 | 49745 | 44  | 0.001243 | 0 | 0.000251 |
| 0.9   | 100    | 123.6227 | 50774 | 62  | 2.88E-05 | 0 | 1.03E-05 |
| 1.9   | 100    | 126.411  | 51889 | 34  | 0.016009 | 0 | 0.000433 |
| 0.9   | 100    | 126.0079 | 51717 | 44  | 0.001387 | 0 | 0.000537 |
| 1.7   | 100    | 124.6275 | 51174 | 62  | 2.96E-05 | 0 | 5.85E-06 |
| 2.3   | 100    | 127.5715 | 52361 | 46  | 0.001049 | 0 | 0.000253 |
| 6.2   | 100    | 78.8797  | 32122 | 65  | 1.17E-05 | 0 | 5.72E-08 |
| 23.5  | 100    | 78.3777  | 31921 | 46  | 0.000993 | 0 | 8.64E-06 |
| 54.9  | 100    | 83.2161  | 33896 | 52  | 0.00021  | 0 | 0.000292 |
| 114.9 | 2.628  | 82.7088  | 33689 | 56  | 7.21E-05 | 0 | 0.000495 |

|       |        |          |       |     |          |   |          |
|-------|--------|----------|-------|-----|----------|---|----------|
| 80.7  | 11.324 | 82.4144  | 33567 | 60  | 3.78E-05 | 0 | 0.000113 |
| 39.2  | 83.693 | 100.3763 | 41246 | 93  | 1.58E-08 | 0 | 1.72E-09 |
| 54.3  | 19.56  | 99.8714  | 41030 | 92  | 2.23E-08 | 0 | 3.67E-09 |
| 29.8  | 100    | 99.3658  | 40812 | 75  | 1.16E-06 | 0 | 3.15E-08 |
| 53.1  | 100    | 99.1363  | 40711 | 97  | 6.53E-09 | 0 | 5.68E-10 |
| 12.6  | 100    | 98.8979  | 40616 | 56  | 7.61E-05 | 0 | 2.23E-05 |
| 11.7  | 100    | 100.8801 | 41450 | 79  | 3.85E-07 | 0 | 5.03E-08 |
| 1.9   | 100    | 104.9354 | 43070 | 39  | 0.003686 | 0 | 0.000447 |
| 5.3   | 100    | 103.9012 | 42643 | 47  | 0.000677 | 0 | 0.000109 |
| 5.7   | 100    | 103.4004 | 42436 | 63  | 1.93E-05 | 0 | 1.17E-05 |
| 3.9   | 100    | 102.8972 | 42241 | 60  | 3.51E-05 | 0 | 1.91E-05 |
| 7     | 100    | 102.3943 | 42048 | 69  | 4.37E-06 | 0 | 3.51E-06 |
| 6.6   | 100    | 101.8879 | 41852 | 71  | 3.25E-06 | 0 | 2.21E-06 |
| 7.4   | 100    | 101.3847 | 41652 | 63  | 1.81E-05 | 0 | 1.19E-05 |
| 6.2   | 100    | 95.9074  | 39327 | 55  | 0.000111 | 0 | 6.88E-05 |
| 103.8 | 3.073  | 41.5714  | 14852 | 72  | 2.22E-06 | 0 | 1.34E-05 |
| 102.1 | 100    | 32.9165  | 11657 | 32  | 0.012899 | 0 | 0.000197 |
| 148   | 30.222 | 32.8678  | 11637 | 48  | 0.000181 | 0 | 3.84E-05 |
| 148   | 100    | 32.3864  | 11445 | 51  | 0.000153 | 0 | 2.3E-06  |
| 48.5  | 100    | 32.3604  | 11434 | 38  | 0.001947 | 0 | 0.000984 |
| 25.5  | 47.361 | 31.9162  | 11257 | 72  | 1.2E-06  | 0 | 5.97E-07 |
| 113.6 | 6.547  | 31.884   | 11246 | 72  | 1.23E-06 | 0 | 1.73E-07 |
| 79.5  | 100    | 41.0678  | 14656 | 45  | 0.001407 | 0 | 0.001132 |
| 36.3  | 100    | 31.3818  | 11055 | 50  | 0.000217 | 0 | 1.3E-05  |
| 11    | 100    | 140.2053 | 57326 | 97  | 8.51E-09 | 0 | 7.79E-09 |
| 10.4  | 100    | 140.1463 | 57299 | 77  | 6.38E-07 | 0 | 9.59E-08 |
| 8.8   | 100    | 139.7024 | 57105 | 93  | 2.03E-08 | 0 | 1.59E-09 |
| 7.2   | 100    | 139.6402 | 57082 | 69  | 4.05E-06 | 0 | 4.47E-07 |
| 5.3   | 100    | 139.1364 | 56883 | 58  | 5.09E-05 | 0 | 3.01E-05 |
| 4.6   | 100    | 138.6356 | 56692 | 47  | 0.000731 | 0 | 0.000145 |
| 36.4  | 100    | 140.4649 | 57447 | 73  | 2.38E-06 | 0 | 5.57E-07 |
| 50.8  | 100    | 140.4693 | 57449 | 77  | 1.06E-06 | 0 | 1.6E-07  |
| 115.4 | 100    | 26.768   | 9245  | 43  | 0.001027 | 0 | 4.72E-05 |
| 9.2   | 100    | 78.61    | 29154 | 40  | 0.000999 | 0 | 0.000287 |
| 11    | 100    | 98.5896  | 37369 | 43  | 0.001776 | 0 | 0.000223 |
| 7.5   | 100    | 98.0165  | 37107 | 64  | 1.37E-05 | 0 | 0.000149 |
| 17.3  | 100    | 140.1851 | 52112 | 26  | 0.046456 | 0 | 7.94E-09 |
| 10.2  | 100    | 111.8467 | 43460 | 45  | 0.001171 | 0 | 5.44E-05 |
| 44    | 100    | 139.9479 | 53873 | 44  | 0.000899 | 0 | 3.25E-07 |
| 7.7   | 100    | 113.8347 | 42576 | 70  | 3.34E-06 | 0 | 0.000157 |
| 19.7  | 100    | 139.1152 | 53482 | 69  | 6.22E-06 | 0 | 9.88E-08 |
| 28.2  | 91.872 | 116.5081 | 45429 | 101 | 3.06E-09 | 0 | 5.97E-10 |
| 30.6  | 20.801 | 116.491  | 45422 | 51  | 0.000343 | 0 | 1.87E-05 |
| 61    | 100    | 140.1362 | 53963 | 107 | 7.86E-10 | 0 | 5.26E-12 |
| 9     | 100    | 121.7138 | 47538 | 52  | 0.000239 | 0 | 0.001084 |
| 18    | 100    | 128.966  | 49107 | 40  | 0.002409 | 0 | 0.001098 |
| 10.4  | 100    | 129.4676 | 49330 | 48  | 0.000426 | 0 | 0.000665 |
| 50.8  | 17.347 | 127.9595 | 48647 | 63  | 1.3E-05  | 0 | 9.78E-06 |
| 1     | 64.112 | 128.377  | 48845 | 49  | 0.000305 | 0 | 0.00154  |
| 69    | 57.32  | 128.4643 | 48883 | 61  | 2.06E-05 | 0 | 1.31E-05 |
| 26.3  | 100    | 115.4287 | 43262 | 53  | 0.000115 | 0 | 0.000535 |
| 60.2  | 10.137 | 141.5564 | 54763 | 96  | 8.67E-09 | 0 | 1.51E-11 |

|       |        |          |       |     |          |          |          |
|-------|--------|----------|-------|-----|----------|----------|----------|
| 43.6  | 100    | 141.5694 | 54772 | 105 | 1.1E-09  | 0        | 5.06E-12 |
| 17.1  | 100    | 141.9045 | 54960 | 100 | 4.85E-09 | 0        | 2.31E-10 |
| 27.7  | 11.569 | 141.8964 | 54955 | 70  | 4.23E-06 | 0        | 9.27E-09 |
| 47.8  | 23.405 | 140.9163 | 54381 | 57  | 7E-05    | 0        | 1.49E-08 |
| 33.1  | 30.56  | 140.9229 | 54386 | 40  | 0.003759 | 0        | 1.9E-06  |
| 0.8   | 100    | 117.5822 | 48275 | 33  | 0.023525 | 0.000141 | 0.001582 |
| 7.5   | 100    | 31.9094  | 9772  | 40  | 0.002246 | 0.000141 | 0.001696 |
| 65.5  | 100    | 55.2796  | 22036 | 41  | 0.002887 | 0.000141 | 0.001597 |
| 4.5   | 100    | 92.3653  | 37797 | 46  | 0.000567 | 0.000273 | 0.002075 |
| 95.1  | 13.619 | 51.092   | 18547 | 62  | 1.71E-05 | 0.000273 | 0.002099 |
| 1.5   | 100    | 111.6354 | 41903 | 44  | 0.001883 | 0.000273 | 0.001877 |
| 1.3   | 100    | 108.443  | 44556 | 31  | 0.024461 | 0.000273 | 0.002101 |
| 0.9   | 100    | 124.1247 | 50979 | 30  | 0.040971 | 0.000273 | 0.001987 |
| 13.6  | 100    | 141.5979 | 54788 | 19  | 0.17473  | 0.000525 | 0.002443 |
| 26.7  | 100    | 28.5915  | 9944  | 31  | 0.018855 | 0.000525 | 0.002428 |
| 11.6  | 100    | 121.7281 | 47544 | 41  | 0.002824 | 0.000525 | 0.002204 |
| 62.1  | 3.683  | 82.7299  | 33698 | 41  | 0.002396 | 0.000525 | 0.002245 |
| 16.8  | 100    | 41.3477  | 13002 | 42  | 0.002433 | 0.000758 | 0.002812 |
| 8.5   | 100    | 99.5427  | 40887 | 30  | 0.036957 | 0.000758 | 0.002787 |
| 1.6   | 100    | 117.0966 | 43815 | 35  | 0.012749 | 0.000868 | 0.003539 |
| 1.6   | 100    | 118.1137 | 48495 | 31  | 0.030501 | 0.000868 | 0.003451 |
| 3.8   | 100    | 81.657   | 30342 | 25  | 0.025141 | 0.000951 | 0.0044   |
| 8.6   | 100    | 119.0552 | 44505 | 27  | 0.096486 | 0.000951 | 0.00406  |
| 4.3   | 100    | 129.2054 | 53022 | 23  | 0.165532 | 0.000951 | 0.003982 |
| 112   | 2.451  | 55.7869  | 22249 | 49  | 0.00058  | 0.001022 | 0.005204 |
| 40.4  | 100    | 42.3222  | 15127 | 38  | 0.006334 | 0.001022 | 0.004732 |
| 5.1   | 100    | 109.9603 | 45170 | 35  | 0.00937  | 0.001022 | 0.00526  |
| 0.5   | 100    | 139.2004 | 56908 | 33  | 0.023878 | 0.001022 | 0.005122 |
| 0.9   | 100    | 76.8016  | 31257 | 34  | 0.014815 | 0.001022 | 0.005768 |
| 18.3  | 100    | 83.8945  | 31183 | 38  | 0.005808 | 0.001022 | 0.004666 |
| 3.5   | 100    | 30.7482  | 10307 | 37  | 0.004248 | 0.001022 | 0.00485  |
| 6.7   | 100    | 132.5146 | 54377 | 22  | 0.191662 | 0.00121  | 0.006793 |
| 13.3  | 91.169 | 78.9739  | 32162 | 45  | 0.001184 | 0.001308 | 0.007062 |
| 0.8   | 100    | 115.0244 | 47223 | 22  | 0.200207 | 0.001308 | 0.007186 |
| 35.3  | 100    | 31.7873  | 9732  | 32  | 0.013798 | 0.001308 | 0.006938 |
| 0.7   | 100    | 116.4781 | 47809 | 31  | 0.030855 | 0.00141  | 0.007249 |
| 11.7  | 100    | 83.8398  | 31160 | 28  | 0.055392 | 0.001498 | 0.007999 |
| 14.6  | 100    | 32.9455  | 12523 | 55  | 7.32E-05 | 0.001576 | 0.008416 |
| 3.4   | 100    | 119.0822 | 48924 | 31  | 0.036514 | 0.001677 | 0.008977 |
| 0.4   | 100    | 20.6102  | 6073  | 46  | 0.000651 | 0.002012 | 0.01093  |
| 0.3   | 100    | 126.7295 | 52010 | 30  | 0.047342 | 0.002257 | 0.01295  |
| 1     | 100    | 117.5376 | 48255 | 22  | 0.206056 | 0.002315 | 0.01371  |
| 1     | 100    | 121.5839 | 49949 | 25  | 0.11146  | 0.002315 | 0.01395  |
| 0.9   | 100    | 101.2252 | 38070 | 24  | 0.12284  | 0.002315 | 0.01388  |
| 0.9   | 100    | 110.9706 | 45620 | 25  | 0.105875 | 0.002376 | 0.01503  |
| 0.4   | 100    | 137.6404 | 50967 | 26  | 0.131643 | 0.002543 | 0.01615  |
| 0     | 100    | 138.1327 | 56504 | 23  | 0.164842 | 0.002543 | 0.01625  |
| 0.5   | 100    | 85.4072  | 31766 | 18  | 0.142214 | 0.002719 | 0.0164   |
| 118.1 | 87.219 | 49.7691  | 19650 | 38  | 0.004183 | 0.002719 | 0.01656  |
| 0.4   | 100    | 128.0746 | 52565 | 18  | 0.630037 | 0.002843 | 0.01872  |
| 4.7   | 100    | 31.4117  | 11067 | 31  | 0.017201 | 0.00337  | 0.02355  |
| 5.7   | 100    | 94.8549  | 35775 | 24  | 0.131215 | 0.00337  | 0.02412  |



|       |        |          |       |     |          |          |          |
|-------|--------|----------|-------|-----|----------|----------|----------|
| 0.9   | 100    | 122.0886 | 50166 | 14  | 1.266332 | 0.00337  | 0.02363  |
| 43.7  | 100    | 33.9362  | 12935 | 52  | 0.000169 | 0.003736 | 0.02724  |
| 4.1   | 100    | 54.9884  | 20079 | 12  | 0.464612 | 0.003736 | 0.02718  |
| 12.1  | 100    | 82.2051  | 33479 | 32  | 0.020824 | 0.003967 | 0.02905  |
| 7.6   | 100    | 121.7953 | 47568 | 26  | 0.084941 | 0.004504 | 0.03201  |
| 129.5 | 76.557 | 49.785   | 19658 | 36  | 0.005591 | 0.004504 | 0.03182  |
| 24.8  | 100    | 48.8783  | 17167 | 43  | 0.001159 | 0.004581 | 0.03237  |
| 4.5   | 100    | 111.9297 | 43497 | 26  | 0.105472 | 0.00496  | 0.03471  |
| 6.7   | 100    | 84.3979  | 31373 | 35  | 0.01062  | 0.005031 | 0.0351   |
| 16.3  | 100    | 48.9618  | 19303 | 39  | 0.003269 | 0.00573  | 0.04055  |
| 1.6   | 100    | 28.5894  | 9943  | 26  | 0.07185  | 0.005792 | 0.04237  |
| 1.6   | 100    | 78.4693  | 31959 | 34  | 0.016763 | 0.005792 | 0.04271  |
| 2.8   | 100    | 53.8421  | 19626 | 16  | 0.192602 | 0.005865 | 0.0433   |
| 3.9   | 100    | 81.7431  | 30376 | 22  | 0.06421  | 0.00861  | 0.06524  |
| 5.1   | 100    | 133.5662 | 51062 | 35  | 0.007062 | 0.008746 | 0.06685  |
| 7.8   | 100    | 83.7264  | 34109 | 23  | 0.163045 | 0.008897 | 0.06717  |
| 0     | 100    | 126.9134 | 52081 | 13  | 2.152649 | 0.008997 | 0.06812  |
| 1.5   | 100    | 129.6116 | 53187 | 10  | 4.534081 | 0.008997 | 0.0685   |
| 30.8  | 100    | 50.7018  | 18393 | 30  | 0.023079 | 0.008997 | 0.06892  |
| 2.6   | 100    | 99.5006  | 40872 | 23  | 0.161581 | 0.00971  | 0.07759  |
| 3.5   | 100    | 118.9167 | 44453 | 22  | 0.274715 | 0.009764 | 0.07862  |
| 19.6  | 24.805 | 98.5599  | 40469 | 63  | 2.21E-05 | 0        | 4.33E-06 |
| 41.8  | 100    | 67.6246  | 23227 | 41  | 0.002564 | 0        | 0.000287 |
| 18.1  | 100    | 108.9666 | 39389 | 107 | 5.79E-10 | 0        | 9.32E-10 |
| 54.9  | 100    | 13.0122  | 3494  | 46  | 0.000529 | 0        | 0.000434 |
| 42.6  | 100    | 68.5638  | 25037 | 64  | 1.34E-05 | 0        | 4.14E-06 |
| 62.7  | 6.832  | 68.3057  | 24934 | 47  | 0.000608 | 0        | 0.000439 |
| 8.5   | 100    | 68.0578  | 24835 | 37  | 0.006638 | 0        | 0.001253 |
| 0.8   | 100    | 129.8026 | 50585 | 42  | 0.001329 | 0        | 1.29E-05 |
| 0.4   | 100    | 130.3078 | 50795 | 53  | 0.000116 | 0        | 1.99E-07 |
| 19.6  | 100    | 139.9589 | 53878 | 63  | 6.77E-06 | 0        | 4.65E-10 |
| 411.9 | 32.013 | 140.5633 | 54172 | 79  | 4.68E-07 | 0        | 7.3E-09  |
| 12.9  | 100    | 140.583  | 54182 | 57  | 8.39E-05 | 0        | 1.07E-05 |
| 26.8  | 100    | 140.5362 | 54158 | 67  | 8.05E-06 | 0        | 5.71E-07 |
| 207.2 | 100    | 140.5975 | 54190 | 68  | 6.96E-06 | 0        | 6.35E-09 |
| 42.1  | 100    | 45.8016  | 17951 | 25  | 0.088971 | 0        | 0.000602 |
| 21    | 26.02  | 87.9683  | 31775 | 97  | 8.08E-09 | 0        | 7.5E-12  |
| 73.6  | 100    | 87.468   | 31566 | 40  | 0.00345  | 0        | 4.89E-07 |
| 41.4  | 100    | 87.5696  | 31607 | 32  | 0.026254 | 0        | 2.87E-09 |
| 20.3  | 28.24  | 141.4212 | 54685 | 68  | 5.78E-06 | 0        | 2.15E-10 |
| 31    | 29.364 | 141.4194 | 54683 | 106 | 1.01E-09 | 0        | 1.82E-14 |
| 36.9  | 100    | 32.6671  | 11260 | 25  | 0.146801 | 0        | 0.001001 |
| 49    | 100    | 32.7831  | 11307 | 30  | 0.040822 | 0        | 0.001462 |
| 23.6  | 100    | 30.1197  | 11351 | 40  | 0.005272 | 0        | 0.000609 |
| 74.1  | 46.77  | 30.1935  | 11385 | 68  | 7.98E-06 | 0        | 1.05E-06 |
| 45.6  | 100    | 37.4132  | 13360 | 52  | 0.000157 | 0        | 0.000128 |
| 0.7   | 100    | 130.8123 | 50998 | 21  | 0.177507 | 0.000525 | 0.00231  |
| 2.3   | 100    | 54.3828  | 19840 | 56  | 4.61E-05 | 0.000758 | 0.002938 |
| 7.4   | 100    | 108.466  | 39172 | 32  | 0.015385 | 0.000758 | 0.003053 |
| 8.6   | 100    | 82.9302  | 30844 | 45  | 0.000989 | 0.000868 | 0.003559 |
| 1.6   | 100    | 88.0753  | 31818 | 20  | 0.396336 | 0.001758 | 0.009321 |
| 5.4   | 100    | 13.107   | 3533  | 55  | 1.77E-05 | 0.001758 | 0.009646 |

|       |        |          |       |    |          |          |          |
|-------|--------|----------|-------|----|----------|----------|----------|
| 2.6   | 100    | 98.6338  | 40499 | 32 | 0.027985 | 0.002079 | 0.01156  |
| 12.6  | 100    | 24.6791  | 7390  | 33 | 0.019674 | 0.002257 | 0.01243  |
| 72.3  | 100    | 42.179   | 15075 | 38 | 0.005624 | 0.002257 | 0.01267  |
| 23.7  | 100    | 72.7725  | 26737 | 36 | 0.006234 | 0.002257 | 0.01247  |
| 34.4  | 100    | 39.4843  | 14319 | 33 | 0.011496 | 0.002315 | 0.01389  |
| 12.6  | 100    | 24.6791  | 7390  | 32 | 0.027599 | 0.002315 | 0.01393  |
| 48.6  | 100    | 25.7864  | 9602  | 17 | 0.903278 | 0.002315 | 0.01383  |
| 69.3  | 100    | 53.3645  | 21230 | 40 | 0.001857 | 0.002843 | 0.01855  |
| 114.3 | 100    | 65.2414  | 23708 | 44 | 0.0014   | 0.00337  | 0.02211  |
| 1.6   | 100    | 107.7631 | 40492 | 23 | 0.233878 | 0.003533 | 0.02443  |
| 72.6  | 37.891 | 47.7108  | 17698 | 43 | 0.000889 | 0.004124 | 0.02943  |
| 6.3   | 100    | 30.6253  | 11558 | 19 | 0.630904 | 0.004581 | 0.03242  |
| 5.6   | 100    | 98.053   | 40253 | 18 | 0.767991 | 0.00496  | 0.0346   |
| 176   | 22.87  | 73.2734  | 26953 | 42 | 0.00193  | 0.005325 | 0.03709  |
| 40.7  | 100    | 16.3815  | 4999  | 25 | 0.077501 | 0.008034 | 0.05858  |
| 155.8 | 51.764 | 65.7498  | 23907 | 50 | 0.000291 | 0.00822  | 0.06094  |
| 128.9 | 18.681 | 41.6777  | 14889 | 38 | 0.006028 | 0.009514 | 0.07586  |
| 30.3  | 100    | 73.0147  | 27057 | 68 | 4.95E-06 | 0        | 1.92E-06 |
| 59.7  | 81.563 | 73.5171  | 27239 | 75 | 1.23E-06 | 0        | 2.25E-06 |
| 92.8  | 13.085 | 73.3398  | 27177 | 42 | 0.002262 | 0        | 0.000503 |
| 1.1   | 100    | 36.3224  | 11211 | 42 | 0.001421 | 0        | 4.27E-05 |
| 134.6 | 100    | 37.5403  | 12859 | 42 | 0.001735 | 0        | 0.000351 |
| 4.4   | 100    | 118.5393 | 48680 | 46 | 0.000991 | 0        | 0.000519 |
| 4.4   | 70.837 | 118.0375 | 48466 | 50 | 0.000349 | 0        | 0.000372 |
| 2.5   | 100    | 119.0402 | 48907 | 43 | 0.001957 | 0        | 0.001259 |
| 112.7 | 100    | 39.6605  | 14140 | 42 | 0.001679 | 0        | 0.000463 |
| 6.8   | 100    | 58.0378  | 20781 | 68 | 7.04E-06 | 0        | 0.000185 |
| 28.5  | 100    | 61.0915  | 22028 | 41 | 0.002895 | 0        | 7.65E-05 |
| 21.6  | 100    | 61.6002  | 22228 | 45 | 0.001384 | 0        | 5.4E-05  |
| 35.8  | 22.738 | 126.1005 | 49035 | 78 | 5.52E-07 | 0        | 2.72E-07 |
| 10.3  | 100    | 125.5919 | 48823 | 44 | 0.001338 | 0        | 0.000221 |
| 15.8  | 53.692 | 110.4215 | 41118 | 42 | 0.000835 | 0        | 0.001216 |
| 15    | 36.426 | 56.1026  | 20461 | 43 | 0.001031 | 0        | 1.47E-05 |
| 38.2  | 85.201 | 102.1467 | 39473 | 49 | 0.000377 | 0        | 3.58E-06 |
| 21.1  | 100    | 110.4431 | 41127 | 51 | 0.000101 | 0        | 0.000315 |
| 27.8  | 56.465 | 101.595  | 39226 | 55 | 9.72E-05 | 0        | 2.23E-06 |
| 2.4   | 100    | 101.0915 | 39024 | 37 | 0.006298 | 0        | 0.000464 |
| 100.7 | 4.838  | 68.4464  | 25457 | 49 | 0.000535 | 0        | 0.000752 |
| 4.1   | 100    | 68.8233  | 25261 | 75 | 6.23E-07 | 0        | 1.18E-07 |
| 18.8  | 100    | 94.847   | 34580 | 49 | 0.000444 | 0        | 3.65E-07 |
| 21.1  | 30.976 | 94.3436  | 34379 | 49 | 0.000436 | 0        | 4.01E-07 |
| 0.4   | 100    | 96.2838  | 35694 | 33 | 9.57E-05 | 0        | 0.000589 |
| 21.3  | 100    | 31.6569  | 11989 | 50 | 0.000322 | 0        | 0.001477 |
| 12.7  | 100    | 93.8411  | 34170 | 40 | 0.00338  | 0        | 1.44E-05 |
| 13    | 33.883 | 96.7876  | 35886 | 87 | 4.19E-10 | 0        | 9.53E-09 |
| 2.5   | 100    | 97.2913  | 36073 | 64 | 7.21E-08 | 0        | 5.31E-07 |
| 22.5  | 100    | 68.954   | 25661 | 49 | 0.000574 | 0.000273 | 0.001936 |
| 2.2   | 100    | 94.3754  | 34392 | 23 | 0.162069 | 0.000407 | 0.002132 |
| 31    | 17.298 | 68.8254  | 25606 | 42 | 0.001268 | 0.000525 | 0.002596 |
| 20.3  | 100    | 68.4531  | 25111 | 19 | 0.255772 | 0.000525 | 0.002335 |
| 0.6   | 100    | 117.5885 | 48278 | 30 | 0.039234 | 0.000868 | 0.003272 |
| 14.9  | 100    | 20.6272  | 7366  | 46 | 0.000825 | 0.001022 | 0.005696 |

|      |        |          |       |    |          |          |          |
|------|--------|----------|-------|----|----------|----------|----------|
| 4.1  | 100    | 86.6124  | 31207 | 37 | 0.008619 | 0.001114 | 0.005959 |
| 2.2  | 100    | 101.0501 | 38716 | 28 | 0.03172  | 0.001114 | 0.006412 |
| 9    | 100    | 48.6447  | 17472 | 51 | 0.000153 | 0.00121  | 0.006752 |
| 0    | 100    | 117.9065 | 44109 | 30 | 0.037085 | 0.001576 | 0.00831  |
| 7.4  | 100    | 68.4039  | 25439 | 31 | 0.030633 | 0.001576 | 0.008148 |
| 13.8 | 100    | 37.2801  | 12907 | 48 | 0.000457 | 0.001576 | 0.008574 |
| 2.6  | 100    | 56.8997  | 22730 | 36 | 0.006438 | 0.001758 | 0.00919  |
| 10.3 | 100    | 73.1925  | 27383 | 40 | 0.000893 | 0.001854 | 0.009871 |
| 7.1  | 100    | 44.1012  | 15266 | 35 | 0.004578 | 0.002257 | 0.01282  |
| 0    | 100    | 96.6292  | 35826 | 18 | 0.003228 | 0.002719 | 0.01682  |
| 1.4  | 100    | 109.9163 | 40902 | 25 | 0.045256 | 0.002777 | 0.01788  |
| 10.1 | 100    | 61.0382  | 22003 | 31 | 0.026533 | 0.002843 | 0.01872  |
| 39.7 | 100    | 34.3918  | 11419 | 36 | 0.002135 | 0.003096 | 0.02035  |
| 9.5  | 100    | 48.1402  | 17278 | 38 | 0.003538 | 0.003967 | 0.02891  |
| 77.6 | 100    | 43.6623  | 15099 | 17 | 0.345849 | 0.006497 | 0.04814  |
| 2.1  | 100    | 118.2824 | 48564 | 23 | 0.186891 | 0.008559 | 0.06485  |
| 4.5  | 100    | 90.563   | 33830 | 73 | 1.34E-06 | 0        | 4.87E-05 |
| 29.9 | 100    | 70.2625  | 25978 | 48 | 0.000803 | 0        | 0.001257 |
| 23.1 | 100    | 32.302   | 10874 | 26 | 0.110657 | 0        | 0.000817 |
| 11.7 | 100    | 32.8409  | 11078 | 67 | 9.17E-06 | 0        | 3.19E-05 |
| 79.8 | 18.195 | 32.8072  | 11067 | 37 | 0.00913  | 0        | 0.000309 |
| 17.2 | 100    | 45.5961  | 14533 | 65 | 1.23E-05 | 0        | 1.61E-05 |
| 79.9 | 33.312 | 33.8855  | 12025 | 37 | 0.008943 | 0        | 0.000376 |
| 21.5 | 100    | 31.2117  | 10990 | 70 | 1.17E-06 | 0        | 0.000551 |
| 18.5 | 100    | 67.6073  | 23221 | 49 | 0.000277 | 0        | 3.95E-05 |
| 44.1 | 100    | 67.1075  | 23021 | 35 | 0.006996 | 0        | 3.38E-05 |
| 13.7 | 100    | 97.0181  | 34540 | 41 | 0.002446 | 0        | 0.00089  |
| 38.5 | 3.916  | 96.5357  | 34355 | 53 | 0.000185 | 0        | 1.69E-05 |
| 44.6 | 8.148  | 96.5143  | 34346 | 72 | 1.97E-06 | 0        | 1.41E-06 |
| 12.2 | 100    | 96.0334  | 34139 | 32 | 0.02201  | 0        | 0.001426 |
| 28.3 | 100    | 90.0628  | 31783 | 58 | 5.93E-05 | 0        | 2.75E-06 |
| 48.6 | 100    | 89.5598  | 31582 | 61 | 3.27E-05 | 0        | 1.36E-06 |
| 6.9  | 100    | 101.5779 | 36330 | 50 | 0.000484 | 0        | 9.88E-05 |
| 9.1  | 100    | 105.5758 | 37931 | 48 | 0.000682 | 0        | 0.000197 |
| 49.3 | 85.848 | 77.1764  | 26653 | 31 | 0.016613 | 0        | 1.51E-05 |
| 69.3 | 24.064 | 77.1481  | 26641 | 42 | 0.00144  | 0        | 1.59E-06 |
| 41.1 | 59.196 | 77.651   | 26829 | 42 | 0.001361 | 0        | 2.41E-06 |
| 37.1 | 54.997 | 76.6736  | 26457 | 54 | 8.35E-05 | 0        | 4.46E-07 |
| 57.9 | 23.627 | 76.6473  | 26446 | 48 | 0.000376 | 0        | 9.65E-07 |
| 31.8 | 100    | 77.6806  | 26841 | 42 | 0.001284 | 0        | 5.13E-06 |
| 21.4 | 100    | 79.1597  | 27412 | 42 | 0.001438 | 0        | 3.35E-05 |
| 10.9 | 100    | 78.6867  | 27235 | 47 | 0.000422 | 0        | 2.32E-05 |
| 74.4 | 94.642 | 78.657   | 27223 | 45 | 0.000613 | 0        | 5.84E-07 |
| 21.9 | 100    | 78.1826  | 27036 | 47 | 0.000381 | 0        | 3.88E-05 |
| 64.8 | 70.103 | 78.153   | 27023 | 46 | 0.000613 | 0        | 3.3E-07  |
| 13.9 | 100    | 87.7033  | 32831 | 41 | 0.003565 | 0        | 1.05E-05 |
| 4.6  | 100    | 87.7835  | 32869 | 53 | 0.000191 | 0        | 2.67E-05 |
| 4.4  | 100    | 88.3083  | 33100 | 46 | 0.000909 | 0        | 0.000635 |
| 13.7 | 100    | 64.6936  | 23484 | 49 | 0.000433 | 0        | 1.01E-05 |
| 11.8 | 100    | 64.1882  | 23274 | 57 | 7.94E-05 | 0        | 6.13E-06 |
| 33.1 | 81.501 | 121.6926 | 47206 | 93 | 1.96E-08 | 0        | 1.05E-09 |
| 17.6 | 7.735  | 121.6724 | 47197 | 62 | 2.79E-05 | 0        | 6.49E-07 |

|       |        |          |       |    |          |          |          |
|-------|--------|----------|-------|----|----------|----------|----------|
| 2.3   | 100    | 117.5386 | 45413 | 49 | 0.000473 | 0        | 0.000148 |
| 5.7   | 100    | 93.0161  | 35016 | 67 | 8.24E-06 | 0        | 8.05E-05 |
| 19.8  | 68.141 | 95.637   | 36109 | 66 | 1.07E-05 | 0        | 9.94E-07 |
| 163.6 | 85.218 | 139.7572 | 53782 | 64 | 3.19E-06 | 0        | 2.54E-06 |
| 51.9  | 21.399 | 103.4016 | 38261 | 60 | 2.53E-05 | 0        | 0.00041  |
| 3.6   | 100    | 101.2582 | 37339 | 87 | 7.63E-08 | 0        | 4.47E-07 |
| 17.4  | 3.592  | 100.2488 | 36913 | 93 | 2.24E-08 | 0        | 4.36E-11 |
| 149.5 | 63.299 | 140.6506 | 54218 | 90 | 7.71E-09 | 0        | 2.33E-07 |
| 5.6   | 100    | 100.7534 | 37132 | 43 | 0.001867 | 0        | 0.000169 |
| 54.3  | 100    | 141.1452 | 54518 | 29 | 0.020883 | 0        | 1.09E-06 |
| 8.5   | 100    | 49.5517  | 19563 | 56 | 6.78E-05 | 0        | 0.001063 |
| 79.6  | 100    | 42.1028  | 16343 | 69 | 1.38E-06 | 0        | 8.41E-05 |
| 12.3  | 100    | 70.8547  | 26229 | 43 | 0.002132 | 0.000141 | 0.001684 |
| 44    | 100    | 45.5297  | 14505 | 19 | 0.455186 | 0.000141 | 0.001687 |
| 15.5  | 100    | 74.7105  | 27698 | 45 | 0.001527 | 0.000273 | 0.001844 |
| 30.3  | 100    | 31.8025  | 11216 | 18 | 0.732424 | 0.000273 | 0.001933 |
| 12.9  | 100    | 32.7253  | 9997  | 29 | 0.06285  | 0.000273 | 0.001915 |
| 37.4  | 100    | 75.4029  | 25961 | 27 | 0.063004 | 0.000525 | 0.002459 |
| 37.4  | 100    | 75.4029  | 25961 | 27 | 0.063004 | 0.000525 | 0.002459 |
| 0     | 100    | 122.1768 | 47410 | 33 | 0.020341 | 0.000758 | 0.002831 |
| 22.6  | 100    | 33.5034  | 11873 | 26 | 0.106974 | 0.000758 | 0.002987 |
| 45.4  | 100    | 74.1317  | 25916 | 25 | 0.121375 | 0.000758 | 0.003126 |
| 29.3  | 100    | 71.2736  | 26392 | 43 | 0.002477 | 0.000758 | 0.002797 |
| 9.9   | 100    | 75.1406  | 25861 | 25 | 0.10544  | 0.000868 | 0.003334 |
| 9.9   | 100    | 75.1406  | 25861 | 25 | 0.10544  | 0.000868 | 0.003334 |
| 30.3  | 100    | 33.3136  | 11251 | 23 | 0.197688 | 0.000868 | 0.003454 |
| 1.8   | 100    | 106.5221 | 40058 | 40 | 0.003997 | 0.000951 | 0.00365  |
| 26.8  | 100    | 54.15    | 17830 | 24 | 0.075625 | 0.001022 | 0.005039 |
| 32.3  | 100    | 34.439   | 12234 | 40 | 0.003188 | 0.001022 | 0.005042 |
| 9.9   | 100    | 96.2524  | 35187 | 46 | 0.000607 | 0.001114 | 0.006311 |
| 0.5   | 100    | 119.1593 | 46081 | 26 | 0.100653 | 0.001114 | 0.006192 |
| 216.7 | 8.493  | 49.6213  | 17455 | 31 | 0.029515 | 0.00121  | 0.006459 |
| 20.5  | 100    | 97.0441  | 34551 | 25 | 0.122167 | 0.00121  | 0.006592 |
| 36.9  | 100    | 33.9357  | 12046 | 35 | 0.009787 | 0.00141  | 0.007402 |
| 58.2  | 94.195 | 49.7033  | 17487 | 42 | 0.002504 | 0.00141  | 0.00729  |
| 69.1  | 100    | 50.1252  | 17655 | 27 | 0.077606 | 0.001576 | 0.008583 |
| 1.6   | 100    | 93.5201  | 35221 | 37 | 0.007263 | 0.001758 | 0.009448 |
| 5     | 100    | 32.5476  | 9989  | 42 | 0.001773 | 0.001758 | 0.00931  |
| 21.4  | 100    | 33.3813  | 11828 | 17 | 0.823906 | 0.001854 | 0.009792 |
| 5.7   | 100    | 16.6159  | 4732  | 51 | 5.44E-05 | 0.002012 | 0.01037  |
| 0.9   | 100    | 133.5214 | 49261 | 18 | 0.669518 | 0.002012 | 0.01107  |
| 9.2   | 100    | 89.0561  | 31376 | 26 | 0.092211 | 0.002079 | 0.01196  |
| 10.5  | 100    | 71.7769  | 26592 | 36 | 0.010464 | 0.002079 | 0.01164  |
| 135.6 | 100    | 31.3774  | 10530 | 33 | 0.013277 | 0.002376 | 0.01431  |
| 5.2   | 100    | 67.6607  | 23241 | 54 | 1.5E-05  | 0.002543 | 0.01616  |
| 97.7  | 2.021  | 70.768   | 26197 | 43 | 0.002358 | 0.002543 | 0.01573  |
| 7     | 100    | 79.1954  | 27428 | 22 | 0.11088  | 0.002777 | 0.01801  |
| 5.6   | 100    | 96.2863  | 35203 | 24 | 0.146913 | 0.002931 | 0.01953  |
| 125.5 | 100    | 13.189   | 3704  | 12 | 2.930764 | 0.003736 | 0.02669  |
| 6.5   | 100    | 82.6464  | 30728 | 21 | 0.31342  | 0.003892 | 0.02805  |
| 8.4   | 100    | 71.5072  | 24814 | 31 | 0.031463 | 0.004424 | 0.03175  |
| 20.3  | 100    | 30.3578  | 10151 | 35 | 0.010704 | 0.004581 | 0.03257  |

|       |        |          |       |     |          |          |          |
|-------|--------|----------|-------|-----|----------|----------|----------|
| 36.8  | 100    | 50.0574  | 19778 | 35  | 0.009448 | 0.004803 | 0.03402  |
| 14.1  | 100    | 33.82    | 11439 | 16  | 1.116823 | 0.005478 | 0.03782  |
| 15    | 100    | 50.6853  | 17875 | 24  | 0.135376 | 0.005687 | 0.03941  |
| 0.5   | 100    | 106.5745 | 40077 | 28  | 0.064344 | 0.00573  | 0.04159  |
| 0.7   | 100    | 140.1637 | 53976 | 20  | 0.076904 | 0.00573  | 0.04032  |
| 26.6  | 100    | 49.1173  | 17258 | 27  | 0.070662 | 0.006222 | 0.04591  |
| 9.8   | 100    | 16.6589  | 4625  | 39  | 0.000934 | 0.006371 | 0.04634  |
| 23.8  | 100    | 88.2031  | 33050 | 9   | 5.820561 | 0.006428 | 0.04707  |
| 2.3   | 100    | 88.3742  | 36145 | 14  | 1.534022 | 0.007636 | 0.05465  |
| 40.3  | 100    | 33.4842  | 11314 | 9   | 3.529884 | 0.007836 | 0.05629  |
| 4.3   | 100    | 122.4234 | 47521 | 29  | 0.055226 | 0.00822  | 0.06192  |
| 38.5  | 100    | 16.8105  | 5199  | 49  | 0.000129 | 0.008361 | 0.0628   |
| 0     | 100    | 100.3284 | 36950 | 22  | 0.256443 | 0.0085   | 0.064    |
| 4.2   | 100    | 99.0673  | 35332 | 11  | 2.423208 | 0.009858 | 0.08112  |
| 19.9  | 100    | 34.7069  | 11895 | 43  | 0.000426 | 0.009858 | 0.08143  |
| 17.5  | 100    | 45.6375  | 15868 | 20  | 0.487905 | 0        | 0.00091  |
| 0     | 100    | 140.241  | 51859 | 58  | 2.48E-05 | 0        | 1.43E-06 |
| 10.1  | 100    | 49.0328  | 17759 | 44  | 0.000912 | 0        | 0.000984 |
| 28    | 100    | 48.5305  | 17557 | 38  | 0.003329 | 0        | 5.84E-05 |
| 32.5  | 63.525 | 140.6631 | 55307 | 99  | 3.82E-09 | 0        | 1.3E-10  |
| 16.2  | 100    | 97.4599  | 34712 | 46  | 0.000875 | 0        | 0.000254 |
| 5.9   | 100    | 97.4897  | 34724 | 52  | 0.000262 | 0        | 5.78E-05 |
| 36.6  | 26.214 | 74.1135  | 25457 | 42  | 0.003265 | 0        | 7.81E-06 |
| 16.3  | 100    | 73.9278  | 25376 | 52  | 0.000323 | 0        | 7.39E-05 |
| 0.4   | 100    | 118.1667 | 43210 | 52  | 0.000127 | 0        | 8.32E-06 |
| 1     | 100    | 125.4044 | 48744 | 69  | 2.68E-06 | 0        | 1.51E-07 |
| 29.7  | 100    | 140.0578 | 54992 | 37  | 0.004637 | 0        | 9.59E-07 |
| 0     | 100    | 136.3265 | 53331 | 40  | 0.00241  | 0        | 0.000595 |
| 0.9   | 100    | 136.1481 | 53259 | 72  | 1.43E-06 | 0        | 3.97E-09 |
| 215.5 | 76.48  | 140.7176 | 52396 | 103 | 1.56E-09 | 0        | 8.51E-10 |
| 12.8  | 100    | 140.7422 | 52408 | 59  | 4.21E-05 | 0        | 5.68E-06 |
| 166.2 | 100    | 16.5753  | 5368  | 22  | 0.25876  | 0        | 0.001547 |
| 2.1   | 100    | 119.4149 | 44988 | 51  | 0.000289 | 0        | 0.0001   |
| 1.5   | 100    | 118.9144 | 44785 | 44  | 0.00141  | 0        | 0.00049  |
| 154.1 | 100    | 50.2359  | 17655 | 57  | 4.1E-05  | 0        | 0.000508 |
| 21.4  | 45.854 | 44.9666  | 17567 | 44  | 0.000983 | 0        | 9.78E-05 |
| 28.2  | 100    | 53.2933  | 21202 | 49  | 0.000417 | 0        | 0.000847 |
| 43.1  | 43.738 | 140.7661 | 54287 | 70  | 5.39E-06 | 0        | 1.91E-09 |
| 7.8   | 100    | 72.2645  | 29348 | 46  | 0.00081  | 0        | 1.18E-05 |
| 14.7  | 100    | 91.6309  | 33258 | 39  | 0.00356  | 0        | 0.000351 |
| 34.5  | 94.541 | 91.1255  | 33057 | 53  | 0.000146 | 0        | 7.45E-05 |
| 1.3   | 100    | 71.7606  | 29127 | 33  | 0.017375 | 0.000273 | 0.00208  |
| 28.3  | 100    | 37.5809  | 11685 | 43  | 0.000262 | 0.000951 | 0.004547 |
| 61.9  | 100    | 45.1096  | 17630 | 33  | 0.018374 | 0.00121  | 0.006766 |
| 2     | 100    | 96.9884  | 34528 | 30  | 0.042379 | 0.001945 | 0.01005  |
| 10.6  | 100    | 114.9996 | 43070 | 32  | 0.019853 | 0.002079 | 0.01151  |
| 266.7 | 100    | 35.1811  | 13460 | 38  | 0.004559 | 0.002843 | 0.01909  |
| 0     | 100    | 125.9127 | 48958 | 23  | 0.103812 | 0.00337  | 0.02207  |
| 10.5  | 100    | 65.4208  | 23844 | 50  | 0.00015  | 0.00337  | 0.02309  |
| 67.3  | 100    | 30.6232  | 11557 | 30  | 0.022951 | 0.003967 | 0.02882  |
| 12    | 100    | 86.8666  | 31319 | 15  | 0.918082 | 0.004643 | 0.03336  |
| 117.5 | 100    | 17.6235  | 5927  | 37  | 0.005945 | 0.004643 | 0.03371  |

|       |        |          |       |     |          |          |          |
|-------|--------|----------|-------|-----|----------|----------|----------|
| 8.9   | 100    | 52.7871  | 20976 | 30  | 0.027747 | 0.00573  | 0.04033  |
| 13.4  | 100    | 90.6188  | 32859 | 16  | 0.706669 | 0.009858 | 0.08111  |
| 28.1  | 100    | 53.0831  | 17428 | 29  | 0.049158 | 0        | 0.000525 |
| 6.7   | 100    | 30.1279  | 9131  | 66  | 2.34E-06 | 0        | 0.001264 |
| 0.3   | 100    | 130.9689 | 48635 | 78  | 1.82E-07 | 0        | 2.09E-05 |
| 0.3   | 100    | 130.4653 | 48471 | 85  | 3.45E-08 | 0        | 5.02E-06 |
| 0     | 54.598 | 83.593   | 34056 | 83  | 2.03E-07 | 0        | 5.68E-08 |
| 5.8   | 27.924 | 83.534   | 34031 | 56  | 8.33E-05 | 0        | 1.44E-06 |
| 8     | 100    | 83.0836  | 33839 | 63  | 1.7E-05  | 0        | 8.55E-07 |
| 77.1  | 8.074  | 39.0728  | 13928 | 49  | 0.000504 | 0        | 0.000392 |
| 8.7   | 9.349  | 54.8123  | 20004 | 97  | 8.08E-09 | 0        | 8.26E-08 |
| 19.8  | 13.015 | 54.7398  | 19974 | 72  | 2.5E-06  | 0        | 2.39E-07 |
| 43.8  | 100    | 58.0238  | 21264 | 54  | 0.000147 | 0        | 0.000974 |
| 64.8  | 12.533 | 57.5188  | 21070 | 51  | 0.000345 | 0        | 0.000994 |
| 68.3  | 100    | 31.4365  | 11076 | 49  | 0.000497 | 0        | 0.000611 |
| 50.7  | 54.549 | 54.3127  | 19812 | 74  | 1.83E-06 | 0        | 9.85E-08 |
| 3.4   | 100    | 25.8138  | 7756  | 63  | 1.41E-05 | 0        | 0.000199 |
| 41.8  | 10.312 | 132.7414 | 51820 | 74  | 8.64E-07 | 0        | 8.18E-07 |
| 5.4   | 27.271 | 132.781  | 51838 | 69  | 3.14E-06 | 0        | 9.09E-06 |
| 15.1  | 84.995 | 140.6402 | 52350 | 107 | 8.9E-10  | 0        | 4.23E-11 |
| 24.5  | 71.928 | 53.9821  | 19190 | 41  | 0.00267  | 0        | 1.14E-05 |
| 2.2   | 100    | 76.9075  | 28943 | 75  | 7.71E-08 | 0        | 6.37E-05 |
| 69.3  | 34.275 | 77.8341  | 29041 | 56  | 7.67E-05 | 0        | 0.000355 |
| 0     | 100    | 106.7068 | 40830 | 47  | 0.000433 | 0        | 0.000748 |
| 2     | 100    | 110.5917 | 42265 | 49  | 0.0004   | 0        | 0.00029  |
| 44.1  | 9.582  | 111.0722 | 42442 | 89  | 3.74E-08 | 0        | 2.26E-09 |
| 13.6  | 6.111  | 111.0921 | 42450 | 73  | 1.46E-06 | 0        | 1.8E-07  |
| 1.8   | 100    | 111.5951 | 42633 | 62  | 1.88E-05 | 0        | 1E-05    |
| 8.9   | 100    | 50.4238  | 19937 | 56  | 7.26E-05 | 0        | 8.84E-07 |
| 19.2  | 100    | 50.9243  | 20155 | 32  | 0.018002 | 0        | 5.36E-05 |
| 32.6  | 100    | 64.8149  | 24248 | 53  | 0.000155 | 0        | 0.001234 |
| 67    | 79.088 | 43.8956  | 17117 | 47  | 0.000731 | 0        | 5.49E-06 |
| 63.7  | 73.945 | 35.1921  | 12250 | 44  | 0.000812 | 0        | 0.000452 |
| 24.7  | 100    | 35.6951  | 12452 | 55  | 7.18E-05 | 0        | 0.00021  |
| 8.7   | 100    | 39.4004  | 13879 | 56  | 5E-05    | 0        | 0.000512 |
| 2.7   | 100    | 96.6126  | 35820 | 43  | 0.001961 | 0        | 0.001052 |
| 3.3   | 100    | 96.1237  | 35638 | 47  | 0.000825 | 0        | 0.000139 |
| 8.5   | 100    | 96.6267  | 35825 | 65  | 1.14E-05 | 0        | 3.02E-06 |
| 42.5  | 100    | 64.31    | 24072 | 50  | 0.000306 | 0.000141 | 0.001756 |
| 0     | 100    | 13.2094  | 3566  | 53  | 2.62E-05 | 0.000141 | 0.001737 |
| 125.3 | 72.376 | 40.2159  | 14195 | 24  | 0.202526 | 0.000141 | 0.00169  |
| 12.3  | 100    | 16.9628  | 4856  | 40  | 0.004253 | 0.000273 | 0.001818 |
| 1.9   | 100    | 111.5758 | 42626 | 41  | 0.002758 | 0.000273 | 0.002069 |
| 124.4 | 100    | 39.2079  | 13803 | 25  | 0.163893 | 0.000525 | 0.002215 |
| 15.3  | 100    | 60.8565  | 21975 | 30  | 0.005654 | 0.000525 | 0.002637 |
| 23.3  | 100    | 25.4668  | 8775  | 30  | 0.03413  | 0.000525 | 0.002504 |
| 25.1  | 100    | 53.7872  | 19117 | 34  | 0.013819 | 0.000525 | 0.002491 |
| 28.5  | 100    | 38.7493  | 13803 | 41  | 0.00355  | 0.000525 | 0.002592 |
| 8.4   | 100    | 17.5837  | 5085  | 50  | 0.000375 | 0.000525 | 0.002638 |
| 98.4  | 100    | 44.4489  | 15403 | 49  | 0.000249 | 0.00065  | 0.002736 |
| 11.7  | 100    | 57.0989  | 20910 | 39  | 0.005276 | 0.00065  | 0.002718 |
| 3.7   | 100    | 21.6662  | 6405  | 53  | 0.000155 | 0.000951 | 0.00458  |

|       |        |          |       |    |          |          |          |
|-------|--------|----------|-------|----|----------|----------|----------|
| 18.9  | 100    | 17.5107  | 4926  | 48 | 0.00051  | 0.000951 | 0.004217 |
| 161.1 | 100    | 38.7002  | 13597 | 21 | 0.348786 | 0.001022 | 0.00581  |
| 16.7  | 100    | 54.1872  | 19269 | 48 | 0.000356 | 0.001022 | 0.005603 |
| 108.1 | 91.969 | 57.6044  | 21103 | 28 | 0.065438 | 0.001022 | 0.004919 |
| 101.4 | 50.419 | 32.4315  | 11167 | 49 | 0.000357 | 0.001022 | 0.005577 |
| 29.2  | 97.98  | 60.6015  | 21868 | 35 | 0.010051 | 0.001022 | 0.005021 |
| 7.5   | 100    | 30.2563  | 10281 | 46 | 0.000206 | 0.001022 | 0.005671 |
| 52.8  | 86.234 | 60.256   | 21722 | 51 | 0.000251 | 0.001022 | 0.005617 |
| 9.2   | 100    | 25.1449  | 7539  | 34 | 0.013117 | 0.001022 | 0.004652 |
| 137.9 | 4.735  | 43.9479  | 15207 | 48 | 0.000256 | 0.001114 | 0.006133 |
| 0     | 100    | 46.8365  | 15013 | 42 | 0.002379 | 0.001576 | 0.008227 |
| 180.2 | 100    | 38.624   | 13567 | 48 | 0.000457 | 0.001576 | 0.008791 |
| 81.6  | 100    | 44.9437  | 16149 | 44 | 0.000784 | 0.001576 | 0.008072 |
| 0.3   | 100    | 106.3251 | 40688 | 33 | 0.012256 | 0.001758 | 0.009307 |
| 151.7 | 58.259 | 63.8071  | 23890 | 46 | 0.000761 | 0.002012 | 0.01037  |
| 73.9  | 100    | 39.7137  | 14004 | 20 | 0.497097 | 0.002079 | 0.01175  |
| 37.9  | 100    | 55.1113  | 19632 | 31 | 0.0208   | 0.002257 | 0.01295  |
| 33.8  | 100    | 34.7527  | 12078 | 18 | 0.333092 | 0.002543 | 0.01604  |
| 2.1   | 100    | 96.1083  | 35632 | 24 | 0.164427 | 0.002719 | 0.01645  |
| 58.4  | 100    | 21.8401  | 7889  | 45 | 0.000879 | 0.00337  | 0.02233  |
| 42.3  | 100    | 17.6087  | 5588  | 36 | 0.008327 | 0.003674 | 0.02655  |
| 44.6  | 100    | 58.4021  | 20942 | 34 | 0.01045  | 0.003736 | 0.02715  |
| 30.4  | 100    | 17.5283  | 5252  | 36 | 0.008038 | 0.003892 | 0.02833  |
| 18.9  | 100    | 58.8345  | 21132 | 49 | 0.00032  | 0.004192 | 0.03022  |
| 0.4   | 100    | 109.6753 | 42579 | 16 | 0.761281 | 0.004504 | 0.03212  |
| 28.5  | 100    | 32.935   | 11369 | 30 | 0.027077 | 0.004504 | 0.03213  |
| 3.1   | 100    | 53.0314  | 17411 | 21 | 0.290175 | 0.0085   | 0.06389  |
| 150.2 | 50.766 | 37.8926  | 11769 | 24 | 0.041042 | 0        | 0.001212 |
| 71.2  | 100    | 37.3896  | 11593 | 27 | 0.02363  | 0        | 0.000747 |
| 65.5  | 100    | 37.8791  | 11764 | 32 | 0.006966 | 0        | 2.74E-05 |
| 38.8  | 59.676 | 76.4079  | 26887 | 38 | 0.007269 | 0        | 0.00106  |
| 16.8  | 100    | 87.9803  | 35970 | 54 | 9.8E-05  | 0        | 6.72E-07 |
| 1.7   | 100    | 105.9087 | 43500 | 58 | 2.44E-05 | 0        | 2.15E-07 |
| 19.7  | 100    | 43.6121  | 13816 | 28 | 0.016159 | 0        | 0.00031  |
| 15.8  | 100    | 48.5201  | 15629 | 54 | 4.51E-05 | 0        | 0.000375 |
| 167.3 | 100    | 48.4768  | 15611 | 73 | 7.07E-07 | 0        | 5.85E-06 |
| 86.9  | 100    | 47.9752  | 15425 | 40 | 0.001598 | 0        | 0.000186 |
| 183.1 | 91.04  | 48.9801  | 15792 | 69 | 1.97E-06 | 0        | 8.6E-06  |
| 14    | 100    | 109.8862 | 39774 | 61 | 2.96E-05 | 0        | 4.72E-05 |
| 10.8  | 100    | 109.8748 | 39770 | 55 | 0.000116 | 0        | 0.00017  |
| 73.4  | 100    | 46.9808  | 16403 | 45 | 0.000483 | 0        | 0.000191 |
| 3.5   | 100    | 128.5395 | 50069 | 39 | 0.003407 | 0        | 0.000171 |
| 91.8  | 86.161 | 140.574  | 55257 | 82 | 2.74E-07 | 0        | 6.48E-10 |
| 86.3  | 41.806 | 140.5696 | 55254 | 74 | 1.48E-06 | 0        | 5.22E-09 |
| 10.5  | 100    | 94.0658  | 35436 | 45 | 0.001414 | 0        | 2.42E-06 |
| 20.3  | 30.529 | 116.3144 | 45351 | 96 | 3.43E-09 | 0        | 1.11E-09 |
| 2.3   | 100    | 116.0736 | 45246 | 35 | 0.004309 | 0        | 0.000565 |
| 103.8 | 17.288 | 51.1305  | 18462 | 34 | 0.014194 | 0        | 0.000244 |
| 18.8  | 100    | 51.2954  | 18530 | 55 | 9.22E-05 | 0        | 2.74E-05 |
| 26.8  | 100    | 63.0716  | 22887 | 63 | 2.01E-05 | 0        | 9.18E-05 |
| 112.5 | 48.28  | 46.9527  | 16345 | 40 | 0.000959 | 0        | 0.001019 |
| 13.7  | 100    | 52.5645  | 18627 | 54 | 8.75E-05 | 0        | 5.24E-05 |

|       |        |          |       |    |          |          |          |
|-------|--------|----------|-------|----|----------|----------|----------|
| 30.3  | 100    | 52.5289  | 18612 | 29 | 0.033541 | 0        | 0.000446 |
| 31.1  | 100    | 86.9187  | 31341 | 68 | 6.12E-06 | 0        | 1.93E-09 |
| 13.1  | 100    | 86.8551  | 31313 | 35 | 0.013449 | 0        | 6.47E-05 |
| 38.3  | 100    | 87.3682  | 31526 | 54 | 0.000151 | 0        | 2.66E-07 |
| 33.8  | 100    | 77.759   | 27480 | 71 | 3.17E-06 | 0        | 3.16E-06 |
| 56.7  | 71.81  | 141.0054 | 54434 | 76 | 1.02E-06 | 0        | 3.32E-09 |
| 183.2 | 86.789 | 43.2817  | 13693 | 21 | 0.08373  | 0.000141 | 0.001608 |
| 26.9  | 100    | 81.3032  | 30520 | 43 | 0.002212 | 0.000525 | 0.00232  |
| 8.7   | 100    | 109.3817 | 39558 | 36 | 0.009447 | 0.000758 | 0.002872 |
| 13.2  | 100    | 49.6681  | 17882 | 31 | 0.007366 | 0.000868 | 0.003492 |
| 162.4 | 100    | 32.2583  | 11396 | 30 | 0.07813  | 0.000951 | 0.003745 |
| 26.6  | 100    | 43.9852  | 15222 | 43 | 0.000984 | 0.000951 | 0.004426 |
| 8     | 100    | 75.907   | 26680 | 29 | 0.055651 | 0.001022 | 0.004601 |
| 17.4  | 100    | 43.0972  | 13626 | 25 | 0.031065 | 0.001022 | 0.004938 |
| 31    | 100    | 21.8865  | 6875  | 38 | 0.004748 | 0.001022 | 0.00579  |
| 16    | 100    | 77.7511  | 27476 | 35 | 0.014404 | 0.001022 | 0.004912 |
| 9.5   | 100    | 53.2752  | 19333 | 47 | 0.000515 | 0.001114 | 0.005924 |
| 50.8  | 100    | 48.4131  | 16922 | 22 | 0.182489 | 0.00121  | 0.00662  |
| 7.3   | 100    | 82.6327  | 28782 | 18 | 0.698233 | 0.001308 | 0.007187 |
| 104.5 | 100    | 32.7616  | 11597 | 28 | 0.129943 | 0.001498 | 0.007809 |
| 38.6  | 100    | 50.6222  | 18258 | 22 | 0.19783  | 0.001576 | 0.008059 |
| 17.9  | 100    | 31.75    | 9666  | 28 | 0.119872 | 0.001576 | 0.008429 |
| 30.7  | 100    | 42.7791  | 13512 | 16 | 0.303416 | 0.001576 | 0.008668 |
| 12.5  | 100    | 42.3894  | 16470 | 33 | 0.013705 | 0.001758 | 0.009549 |
| 8.5   | 100    | 48.0141  | 15439 | 32 | 0.009127 | 0.002079 | 0.01209  |
| 50.4  | 100    | 46.4785  | 16200 | 27 | 0.02274  | 0.002777 | 0.01803  |
| 40    | 100    | 31.7542  | 11198 | 25 | 0.286092 | 0.002777 | 0.01815  |
| 4.8   | 100    | 81.3554  | 30542 | 26 | 0.097738 | 0.002931 | 0.01938  |
| 12.4  | 100    | 37.0156  | 11499 | 26 | 0.051159 | 0.003254 | 0.02126  |
| 0     | 100    | 123.4165 | 47929 | 17 | 0.639522 | 0.003674 | 0.0257   |
| 2.3   | 100    | 123.923  | 48138 | 22 | 0.194141 | 0.003674 | 0.02656  |
| 1.1   | 100    | 57.6142  | 19072 | 38 | 0.005836 | 0.004643 | 0.03283  |
| 83.3  | 100    | 47.6443  | 16662 | 25 | 0.044876 | 0.005271 | 0.0361   |
| 9.8   | 100    | 32.3293  | 11423 | 36 | 0.017976 | 0.005325 | 0.03748  |
| 2     | 100    | 126.223  | 47025 | 20 | 0.325334 | 0.005687 | 0.03979  |
| 13    | 100    | 49.1652  | 17687 | 16 | 0.231209 | 0.00573  | 0.04044  |
| 15.2  | 100    | 76.0094  | 26723 | 30 | 0.04013  | 0.008962 | 0.06745  |
| 0     | 100    | 115.8094 | 45127 | 6  | 3.498387 | 0.009514 | 0.07286  |
| 2.5   | 100    | 109.3713 | 39553 | 20 | 0.393724 | 0.009858 | 0.08159  |
| 3.5   | 100    | 61.7831  | 22655 | 45 | 0.00095  | 0        | 0.000394 |
| 6.6   | 100    | 61.5832  | 22576 | 40 | 0.002509 | 0        | 0.001199 |
| 50.7  | 100    | 28.9113  | 9613  | 39 | 0.003551 | 0        | 1.65E-06 |
| 3.1   | 100    | 131.704  | 54023 | 66 | 1.01E-05 | 0        | 5.66E-08 |
| 32.8  | 100    | 59.5267  | 19784 | 43 | 0.001722 | 0        | 0.000808 |
| 3.7   | 100    | 99.3859  | 37738 | 56 | 0.000105 | 0        | 7.99E-06 |
| 79.9  | 100    | 33.7985  | 11536 | 44 | 0.001876 | 0        | 0.000546 |
| 15.5  | 100    | 94.8851  | 34596 | 43 | 0.002401 | 0        | 0.000717 |
| 4.9   | 100    | 105.6579 | 39050 | 79 | 1.6E-07  | 0        | 8.87E-08 |
| 0.4   | 100    | 105.1557 | 38873 | 40 | 0.001175 | 0        | 0.000491 |
| 18.9  | 100    | 62.8725  | 23176 | 40 | 0.001238 | 0.000141 | 0.001731 |
| 12.6  | 100    | 39.9054  | 12473 | 32 | 0.009292 | 0.000141 | 0.001626 |
| 10.5  | 100    | 91.4521  | 34166 | 39 | 0.002697 | 0.000273 | 0.001996 |



|      |        |          |       |    |          |          |          |
|------|--------|----------|-------|----|----------|----------|----------|
| 82   | 100    | 54.9637  | 19575 | 16 | 0.69225  | 0.00065  | 0.002668 |
| 42.3 | 100    | 57.7892  | 19279 | 33 | 0.016955 | 0.000758 | 0.002875 |
| 46.9 | 100    | 52.4372  | 18999 | 33 | 0.007249 | 0.001022 | 0.00553  |
| 5.2  | 100    | 114.1353 | 44456 | 32 | 0.009952 | 0.001022 | 0.004784 |
| 23.2 | 100    | 15.7782  | 4705  | 54 | 6.17E-05 | 0.001114 | 0.005954 |
| 81.1 | 100    | 64.8037  | 22051 | 35 | 0.001036 | 0.001308 | 0.00701  |
| 36.1 | 100    | 58.4933  | 20962 | 18 | 0.684674 | 0.001576 | 0.008834 |
| 7    | 100    | 63.4079  | 21263 | 29 | 0.053891 | 0.001758 | 0.00956  |
| 13.9 | 100    | 70.8618  | 26430 | 26 | 0.046588 | 0.002079 | 0.01233  |
| 41.2 | 100    | 32.6419  | 11549 | 16 | 1.023294 | 0.003096 | 0.01969  |
| 7.4  | 100    | 99.9007  | 37961 | 13 | 1.708026 | 0.003674 | 0.02548  |
| 81.9 | 100    | 46.6119  | 16220 | 43 | 0.001376 | 0.004192 | 0.03047  |
| 16.4 | 100    | 76.8071  | 28368 | 24 | 0.141478 | 0.004344 | 0.03115  |
| 1.3  | 100    | 88.8869  | 33165 | 54 | 6.86E-05 | 0        | 9.5E-05  |
| 1.9  | 100    | 92.3739  | 34497 | 64 | 6.72E-06 | 0        | 5.36E-07 |
| 2.6  | 100    | 92.2857  | 34463 | 57 | 2.96E-05 | 0        | 1.76E-05 |
| 0.5  | 100    | 84.3499  | 31356 | 58 | 1.28E-05 | 0        | 0.000368 |
| 0    | 100    | 95.0387  | 35569 | 35 | 0.010478 | 0        | 0.000495 |
| 1.4  | 100    | 94.5326  | 35365 | 41 | 0.002959 | 0        | 0.000663 |
| 48.5 | 100    | 33.8621  | 11454 | 28 | 0.049056 | 0        | 0.000961 |
| 13.1 | 100    | 35.6455  | 12124 | 68 | 5.95E-06 | 0        | 0.001128 |
| 53.4 | 100    | 36.6682  | 12518 | 61 | 2.8E-05  | 0        | 3.55E-06 |
| 81.9 | 8.255  | 36.5065  | 12452 | 46 | 0.000984 | 0        | 0.000173 |
| 42   | 100    | 36.165   | 12322 | 60 | 3.76E-05 | 0        | 1.01E-05 |
| 4.1  | 100    | 36.1544  | 12317 | 69 | 4.45E-06 | 0        | 0.000226 |
| 88.9 | 25.495 | 36.0035  | 12255 | 55 | 0.000108 | 0        | 3.1E-05  |
| 1.9  | 100    | 87.9846  | 35972 | 39 | 0.001987 | 0        | 0.001147 |
| 0    | 64.743 | 90.8844  | 37166 | 95 | 2.95E-09 | 0        | 3.6E-06  |
| 3.4  | 100    | 99.3741  | 40815 | 62 | 1.06E-05 | 0        | 2E-06    |
| 0    | 100    | 92.9538  | 38058 | 59 | 2.07E-05 | 0        | 1.66E-05 |
| 38.9 | 100    | 92.9517  | 38057 | 78 | 2.69E-07 | 0        | 3.04E-09 |
| 2.2  | 51.205 | 92.4423  | 37829 | 50 | 0.000153 | 0        | 6.81E-06 |
| 14.5 | 79.24  | 91.9455  | 37617 | 80 | 1.58E-07 | 0        | 6.05E-09 |
| 2.1  | 42.267 | 91.9373  | 37613 | 65 | 5.35E-06 | 0        | 3.59E-06 |
| 15   | 25.465 | 91.4396  | 37411 | 92 | 9.94E-09 | 0        | 6.41E-10 |
| 1.8  | 13.185 | 91.4314  | 37407 | 72 | 1.03E-06 | 0        | 1.95E-07 |
| 0    | 100    | 91.3884  | 37388 | 82 | 5.05E-08 | 0        | 1.78E-06 |
| 39.7 | 1.785  | 90.9359  | 37188 | 95 | 4.28E-09 | 0        | 4.17E-10 |
| 9.6  | 1.411  | 90.928   | 37184 | 70 | 1.37E-06 | 0        | 4.37E-08 |
| 13.6 | 100    | 92.4463  | 37831 | 59 | 2.15E-05 | 0        | 3.54E-07 |
| 4.9  | 100    | 97.7019  | 40092 | 49 | 0.000179 | 0        | 0.000265 |
| 8.1  | 100    | 95.9959  | 39368 | 62 | 1.09E-05 | 0        | 1.95E-06 |
| 6.1  | 100    | 94.9829  | 38931 | 53 | 6.95E-05 | 0        | 7.15E-05 |
| 35.4 | 100    | 56.3437  | 20619 | 44 | 0.001645 | 0        | 0.000237 |
| 25   | 8.353  | 55.8491  | 20422 | 64 | 1.62E-05 | 0        | 5.35E-06 |
| 57.2 | 4.191  | 55.8417  | 20419 | 49 | 0.000533 | 0        | 0.000738 |
| 57   | 1.765  | 55.3465  | 20223 | 60 | 4.31E-05 | 0        | 3.31E-05 |
| 78.6 | 0.965  | 55.3395  | 20220 | 52 | 0.000247 | 0        | 0.001452 |
| 29.3 | 100    | 52.9734  | 19271 | 44 | 0.00148  | 0        | 0.000566 |
| 14.1 | 100    | 52.9424  | 19259 | 60 | 3.81E-05 | 0        | 6.73E-06 |
| 0    | 100    | 139.4321 | 57001 | 41 | 0.001155 | 0        | 0.000523 |
| 2.1  | 100    | 129.4199 | 47680 | 71 | 3.48E-06 | 0        | 2.22E-08 |

|       |        |          |       |     |          |   |          |
|-------|--------|----------|-------|-----|----------|---|----------|
| 0.9   | 100    | 129.598  | 47750 | 40  | 0.003917 | 0 | 0.000643 |
| 2.9   | 100    | 129.6079 | 47754 | 27  | 0.085104 | 0 | 2.4E-05  |
| 0     | 100    | 129.2899 | 47625 | 81  | 2.56E-07 | 0 | 3.07E-06 |
| 0     | 100    | 128.3867 | 47248 | 75  | 1.39E-06 | 0 | 9.36E-09 |
| 0     | 100    | 128.7783 | 47408 | 86  | 7.23E-08 | 0 | 1.28E-07 |
| 1.7   | 100    | 128.921  | 47469 | 70  | 4.62E-06 | 0 | 5.76E-08 |
| 0     | 100    | 130.5387 | 48132 | 45  | 0.001619 | 0 | 0.000118 |
| 1.1   | 100    | 129.7923 | 47832 | 48  | 0.000529 | 0 | 0.000997 |
| 0     | 100    | 127.8796 | 47059 | 68  | 6.83E-06 | 0 | 2.79E-07 |
| 1.2   | 100    | 125.5172 | 46198 | 76  | 1.08E-06 | 0 | 5.94E-09 |
| 1.4   | 100    | 125.4938 | 46188 | 48  | 0.000701 | 0 | 2.8E-05  |
| 2.2   | 100    | 124.9879 | 45971 | 53  | 0.000225 | 0 | 2.31E-06 |
| 3.7   | 100    | 125.0137 | 45982 | 73  | 2.05E-06 | 0 | 9.19E-11 |
| 0     | 100    | 125.0724 | 46007 | 54  | 0.000136 | 0 | 0.000421 |
| 1.1   | 100    | 126.0204 | 46384 | 56  | 0.000104 | 0 | 6.55E-07 |
| 0.8   | 100    | 126.5291 | 46568 | 74  | 1.65E-06 | 0 | 2.28E-08 |
| 1.2   | 100    | 127.035  | 46751 | 63  | 2.45E-05 | 0 | 2.8E-07  |
| 18.7  | 55.837 | 132.4413 | 48832 | 56  | 7.93E-05 | 0 | 3.84E-05 |
| 10.1  | 67.712 | 136.9996 | 50651 | 62  | 2.21E-05 | 0 | 3.5E-07  |
| 40.2  | 12.731 | 137.4022 | 50830 | 107 | 7.79E-10 | 0 | 4.58E-10 |
| 19.5  | 100    | 137.5134 | 50881 | 83  | 1.97E-07 | 0 | 6.05E-10 |
| 36.1  | 2.448  | 137.2696 | 50770 | 102 | 2.3E-09  | 0 | 1.28E-10 |
| 34.1  | 21.78  | 136.8914 | 50607 | 107 | 7.74E-10 | 0 | 1.05E-09 |
| 24.1  | 100    | 136.439  | 50420 | 63  | 1.85E-05 | 0 | 5.11E-08 |
| 28.5  | 5.849  | 136.76   | 50556 | 107 | 7.57E-10 | 0 | 3.61E-11 |
| 35    | 2.687  | 137.7727 | 51003 | 100 | 3.81E-09 | 0 | 3.89E-11 |
| 26.7  | 100    | 137.7771 | 51005 | 53  | 0.000114 | 0 | 1.41E-06 |
| 35.1  | 18.541 | 137.9134 | 51071 | 107 | 7.56E-10 | 0 | 4.81E-10 |
| 9.5   | 100    | 138.0164 | 51121 | 71  | 3.08E-06 | 0 | 1.75E-06 |
| 1.3   | 100    | 134.1009 | 49482 | 38  | 0.006344 | 0 | 0.000535 |
| 17.4  | 100    | 132.5171 | 48863 | 54  | 0.000108 | 0 | 0.000737 |
| 1.8   | 100    | 132.5197 | 48864 | 46  | 0.0012   | 0 | 0.000355 |
| 1     | 100    | 133.0356 | 49069 | 37  | 0.009257 | 0 | 0.000539 |
| 51.4  | 100    | 38.5322  | 12013 | 51  | 0.000266 | 0 | 5.29E-05 |
| 68.1  | 100    | 38.0285  | 11832 | 27  | 0.067679 | 0 | 0.000538 |
| 0     | 100    | 124.5718 | 45806 | 75  | 1.09E-06 | 0 | 8.85E-08 |
| 5.9   | 100    | 124.5089 | 45780 | 78  | 6.36E-07 | 0 | 5.8E-12  |
| 0     | 100    | 124.4851 | 45770 | 40  | 0.004856 | 0 | 0.001444 |
| 1.8   | 100    | 115.0585 | 41898 | 75  | 1.38E-06 | 0 | 5.83E-09 |
| 8.8   | 100    | 90.5384  | 31973 | 62  | 2.56E-05 | 0 | 9.16E-08 |
| 3.9   | 100    | 90.4936  | 31953 | 43  | 0.00214  | 0 | 0.000111 |
| 2.5   | 100    | 89.9886  | 31752 | 26  | 0.120633 | 0 | 0.000627 |
| 104.1 | 1.48   | 91.4343  | 32344 | 54  | 5.74E-05 | 0 | 6.49E-05 |
| 45.4  | 71.097 | 91.9663  | 32560 | 40  | 0.001756 | 0 | 0.000304 |
| 29.2  | 23.627 | 91.937   | 32549 | 46  | 0.000453 | 0 | 0.000141 |
| 37.8  | 3.998  | 91.4651  | 32357 | 51  | 0.00012  | 0 | 9.32E-05 |
| 1     | 100    | 122.4787 | 44956 | 70  | 4.92E-06 | 0 | 8.55E-08 |
| 1.4   | 100    | 123.9797 | 45571 | 36  | 0.010613 | 0 | 0.001077 |
| 9.3   | 87.997 | 124.0072 | 45583 | 80  | 4.52E-07 | 0 | 4.4E-13  |
| 2.6   | 100    | 124.2118 | 45660 | 37  | 0.005901 | 0 | 0.000729 |
| 11.3  | 7.061  | 122.9745 | 45164 | 82  | 2.54E-07 | 0 | 8.17E-12 |
| 19.6  | 2.473  | 122.991  | 45171 | 81  | 3.61E-07 | 0 | 6.31E-13 |

|       |        |          |       |     |          |   |          |
|-------|--------|----------|-------|-----|----------|---|----------|
| 7.1   | 95.108 | 123.0668 | 45205 | 102 | 2.54E-09 | 0 | 7.31E-11 |
| 3.6   | 24.77  | 123.4787 | 45383 | 81  | 3.17E-07 | 0 | 2.75E-11 |
| 11.4  | 7.378  | 123.4972 | 45391 | 88  | 7.24E-08 | 0 | 7.45E-13 |
| 30.9  | 3.076  | 87.3637  | 32679 | 44  | 0.001947 | 0 | 6.61E-06 |
| 9.5   | 66.784 | 87.3514  | 32673 | 77  | 8.86E-07 | 0 | 5.34E-07 |
| 5.5   | 100    | 87.319   | 32657 | 46  | 0.000916 | 0 | 2.79E-05 |
| 11.7  | 75.297 | 87.2383  | 32620 | 57  | 7.48E-05 | 0 | 3.09E-06 |
| 23.1  | 2.58   | 87.2134  | 32608 | 66  | 1.22E-05 | 0 | 1.49E-08 |
| 4.3   | 23.064 | 87.2076  | 32605 | 78  | 5.37E-07 | 0 | 6.18E-07 |
| 11.1  | 89.419 | 86.8579  | 32458 | 19  | 0.556998 | 0 | 0.000471 |
| 22.5  | 2.646  | 87.7214  | 32840 | 64  | 1.61E-05 | 0 | 2.21E-09 |
| 10.3  | 71.193 | 87.7426  | 32851 | 60  | 3.51E-05 | 0 | 1.16E-05 |
| 3.9   | 100    | 88.8887  | 33348 | 47  | 0.000967 | 0 | 1.4E-06  |
| 6.3   | 27.561 | 88.7404  | 33283 | 71  | 3.75E-06 | 0 | 7.24E-09 |
| 18    | 8.183  | 88.3802  | 33133 | 46  | 0.00114  | 0 | 2.96E-06 |
| 2.1   | 100    | 88.3663  | 33127 | 48  | 0.000621 | 0 | 0.000109 |
| 14.9  | 5.293  | 88.2321  | 33064 | 73  | 1.94E-06 | 0 | 1.12E-08 |
| 33.8  | 6.012  | 140.8049 | 52442 | 96  | 5.43E-09 | 0 | 7.62E-06 |
| 19.4  | 3.706  | 87.8743  | 32908 | 39  | 0.005508 | 0 | 1.12E-05 |
| 7.9   | 73.75  | 87.8603  | 32902 | 65  | 1.43E-05 | 0 | 3.77E-06 |
| 20.7  | 7.215  | 83.4633  | 31060 | 51  | 0.000292 | 0 | 0.000137 |
| 121   | 0.306  | 83.2795  | 30992 | 62  | 2.43E-05 | 0 | 0.000466 |
| 1.1   | 38.189 | 83.1962  | 30956 | 56  | 4.8E-05  | 0 | 0.001038 |
| 0     | 14.21  | 82.688   | 30745 | 62  | 1.32E-05 | 0 | 0.000962 |
| 129.5 | 1.185  | 83.7918  | 31189 | 63  | 1.96E-05 | 0 | 0.000228 |
| 51.6  | 100    | 84.797   | 31600 | 66  | 8.43E-06 | 0 | 3.73E-05 |
| 48.8  | 91.459 | 84.2945  | 31390 | 54  | 0.000148 | 0 | 0.001263 |
| 4.5   | 100    | 83.9684  | 31268 | 64  | 1.33E-05 | 0 | 7.36E-05 |
| 45.3  | 43.562 | 54.1088  | 19230 | 49  | 0.000526 | 0 | 0.000121 |
| 11.3  | 100    | 54.1932  | 19262 | 65  | 1.12E-05 | 0 | 4.53E-05 |
| 41.7  | 100    | 56.6918  | 20239 | 48  | 0.000487 | 0 | 1.29E-05 |
| 3.8   | 100    | 68.192   | 24887 | 44  | 0.00173  | 0 | 0.001076 |
| 1.9   | 100    | 139.5941 | 51843 | 28  | 0.040241 | 0 | 0.001219 |
| 28.6  | 100    | 139.62   | 51854 | 76  | 5.62E-07 | 0 | 2.09E-13 |
| 8.8   | 100    | 138.9071 | 51526 | 71  | 3.36E-06 | 0 | 8.9E-10  |
| 3.3   | 100    | 129.2326 | 50345 | 70  | 4.16E-06 | 0 | 4.44E-08 |
| 0.3   | 100    | 128.7295 | 50147 | 44  | 0.001632 | 0 | 0.000185 |
| 0     | 100    | 128.67   | 50123 | 77  | 6.65E-07 | 0 | 2.43E-06 |
| 29.8  | 4.623  | 139.0679 | 51603 | 69  | 3.14E-06 | 0 | 1.01E-11 |
| 0     | 17.203 | 128.1658 | 49902 | 98  | 5E-09    | 0 | 4.25E-10 |
| 14.9  | 9.338  | 139.0839 | 51610 | 60  | 2.14E-05 | 0 | 2.36E-10 |
| 0     | 100    | 139.8536 | 51958 | 54  | 0.000128 | 0 | 0.001237 |
| 0.6   | 100    | 138.9525 | 54483 | 49  | 0.000322 | 0 | 1.34E-05 |
| 6.5   | 100    | 137.9658 | 54034 | 86  | 9.56E-08 | 0 | 3.22E-08 |
| 7.8   | 100    | 137.6225 | 53875 | 102 | 2.38E-09 | 0 | 6.71E-10 |
| 22.6  | 100    | 137.4198 | 53783 | 73  | 1.81E-06 | 0 | 6.96E-09 |
| 46.1  | 4.191  | 138.2775 | 51242 | 78  | 6.14E-07 | 0 | 7.51E-10 |
| 10.3  | 18.621 | 138.4238 | 51303 | 95  | 1.29E-08 | 0 | 4.98E-10 |
| 17.4  | 44.165 | 137.4617 | 53802 | 98  | 5.51E-09 | 0 | 1.33E-10 |
| 78.1  | 100    | 140.2122 | 52125 | 92  | 2.58E-08 | 0 | 1.12E-09 |
| 5.3   | 100    | 140.2693 | 52152 | 57  | 6.99E-05 | 0 | 1.41E-05 |
| 1.8   | 100    | 114.747  | 44233 | 85  | 1.33E-07 | 0 | 4.04E-09 |

|        |        |          |       |    |          |          |          |
|--------|--------|----------|-------|----|----------|----------|----------|
| 14.8   | 100    | 139.5134 | 53666 | 48 | 0.000588 | 0        | 1.46E-05 |
| 5.3    | 100    | 112.0662 | 41808 | 53 | 0.000212 | 0        | 1.08E-06 |
| 14.8   | 100    | 139.5134 | 53666 | 48 | 0.000588 | 0        | 3.17E-06 |
| 2.1    | 100    | 112.1161 | 41829 | 74 | 1.93E-06 | 0        | 1.1E-08  |
| 28.2   | 71.567 | 100.1087 | 36855 | 10 | 2.356131 | 0        | 0.00024  |
| 40.9   | 7.668  | 140.6512 | 54219 | 72 | 1.31E-06 | 0        | 3.74E-08 |
| 3064.2 | 100    | 140.6368 | 54211 | 90 | 2.32E-08 | 0        | 5.23E-09 |
| 1.7    | 100    | 119.6403 | 45090 | 39 | 0.005417 | 0        | 0.001485 |
| 26     | 100    | 131.7925 | 50319 | 54 | 0.000131 | 0        | 0.00147  |
| 1.5    | 100    | 134.1633 | 51330 | 82 | 2.07E-07 | 0        | 2.95E-08 |
| 12.7   | 56.902 | 129.2832 | 49250 | 46 | 0.000754 | 0        | 0.000305 |
| 17     | 100    | 136.8736 | 52469 | 61 | 2.74E-05 | 0        | 0.001452 |
| 26.7   | 100    | 134.8486 | 51622 | 54 | 0.000137 | 0        | 0.000974 |
| 2.5    | 100    | 134.4676 | 51461 | 45 | 0.000838 | 0        | 1.02E-05 |
| 13.4   | 100    | 134.3905 | 51428 | 78 | 3.6E-07  | 0        | 1.37E-11 |
| 16.1   | 100    | 135.2614 | 51794 | 41 | 0.002613 | 0        | 0.000623 |
| 33.2   | 100    | 86.7003  | 31245 | 38 | 0.006804 | 0        | 2.3E-05  |
| 31.6   | 38.673 | 86.1941  | 31022 | 42 | 0.002696 | 0        | 4.75E-05 |
| 72     | 100    | 87.4495  | 31559 | 26 | 0.045169 | 0        | 0.001262 |
| 32.6   | 84.488 | 43.4298  | 16921 | 66 | 8.08E-06 | 0        | 7.54E-06 |
| 51.6   | 100    | 87.8287  | 31716 | 36 | 0.011336 | 0        | 9.6E-06  |
| 131.5  | 2.535  | 42.92    | 16702 | 50 | 0.000294 | 0        | 0.0003   |
| 5.6    | 100    | 82.9719  | 29699 | 46 | 0.001106 | 0        | 0.000231 |
| 5.6    | 100    | 82.9719  | 29699 | 46 | 0.001106 | 0        | 0.000231 |
| 19.5   | 55.334 | 52.7321  | 20952 | 66 | 8.88E-06 | 0        | 0.001363 |
| 2.6    | 100    | 140.9388 | 50416 | 71 | 3.36E-06 | 0        | 1.79E-07 |
| 325.4  | 1.251  | 140.7361 | 54267 | 79 | 3.75E-07 | 0        | 4.24E-06 |
| 45.2   | 3.877  | 140.7367 | 54268 | 55 | 0.000109 | 0        | 8.3E-05  |
| 267.8  | 24.275 | 140.7866 | 54300 | 82 | 1.87E-07 | 0        | 4.13E-07 |
| 87.8   | 100    | 89.1157  | 36445 | 24 | 0.068531 | 0.000141 | 0.001708 |
| 0      | 100    | 136.9592 | 53596 | 37 | 0.006863 | 0.000141 | 0.001644 |
| 4.4    | 100    | 140.1207 | 57287 | 31 | 0.011561 | 0.000141 | 0.001773 |
| 29.7   | 92.928 | 56.9635  | 20348 | 40 | 0.002771 | 0.000141 | 0.001727 |
| 8.7    | 100    | 83.7021  | 31146 | 64 | 8.13E-06 | 0.000141 | 0.00177  |
| 0      | 100    | 95.489   | 39141 | 37 | 0.003142 | 0.000141 | 0.001579 |
| 37.2   | 49.219 | 67.2274  | 24513 | 47 | 0.000814 | 0.000273 | 0.001976 |
| 0.3    | 100    | 94.4762  | 38713 | 38 | 0.002607 | 0.000273 | 0.001961 |
| 13.6   | 100    | 43.5628  | 16974 | 40 | 0.003215 | 0.000273 | 0.002003 |
| 6.6    | 100    | 138.7604 | 51457 | 28 | 0.072432 | 0.000273 | 0.001879 |
| 14.9   | 100    | 62.5895  | 25183 | 43 | 0.000317 | 0.000273 | 0.00201  |
| 78.4   | 22.558 | 135.8614 | 52052 | 61 | 2.99E-05 | 0.000273 | 0.001863 |
| 13.9   | 96.698 | 43.7089  | 15023 | 60 | 1.38E-05 | 0.000525 | 0.002492 |
| 23.8   | 100    | 37.523   | 11666 | 30 | 0.032276 | 0.000525 | 0.002335 |
| 20.9   | 100    | 140.5321 | 52556 | 28 | 0.049048 | 0.000525 | 0.002441 |
| 72     | 39.564 | 68.0553  | 24937 | 64 | 9.74E-06 | 0.000525 | 0.002389 |
| 19.8   | 100    | 52.4712  | 19080 | 36 | 0.00873  | 0.000525 | 0.002228 |
| 48.5   | 100    | 136.3679 | 52263 | 55 | 0.000113 | 0.00065  | 0.0027   |
| 0.4    | 100    | 83.7015  | 29979 | 37 | 0.007952 | 0.000758 | 0.0028   |
| 34.5   | 100    | 57.7462  | 19125 | 21 | 0.13351  | 0.000758 | 0.003173 |
| 4.7    | 100    | 136.9105 | 52486 | 25 | 0.125749 | 0.000758 | 0.002821 |
| 21.2   | 100    | 35.6316  | 12680 | 38 | 0.006846 | 0.000758 | 0.003227 |
| 1.6    | 100    | 127.0925 | 48307 | 29 | 0.046566 | 0.000758 | 0.002927 |

|       |        |          |       |    |          |          |          |
|-------|--------|----------|-------|----|----------|----------|----------|
| 3.6   | 100    | 135.1136 | 49874 | 38 | 0.005265 | 0.000758 | 0.002839 |
| 14.5  | 100    | 41.192   | 15945 | 39 | 0.000444 | 0.000758 | 0.002821 |
| 47.6  | 3.04   | 101.8996 | 37620 | 30 | 0.031465 | 0.000758 | 0.002875 |
| 4.5   | 100    | 67.6845  | 24687 | 36 | 0.012116 | 0.000868 | 0.003521 |
| 11.9  | 100    | 63.5983  | 25606 | 37 | 0.00132  | 0.000868 | 0.003389 |
| 41.3  | 73.493 | 67.1775  | 24493 | 44 | 0.001803 | 0.000868 | 0.003492 |
| 9.2   | 100    | 65.1565  | 23675 | 31 | 0.039232 | 0.000868 | 0.003502 |
| 11.7  | 100    | 93.4573  | 38290 | 29 | 0.019914 | 0.000951 | 0.004168 |
| 0     | 100    | 93.9677  | 38507 | 31 | 0.012167 | 0.000951 | 0.004462 |
| 16    | 100    | 85.405   | 31846 | 42 | 0.002073 | 0.000951 | 0.004262 |
| 13.8  | 100    | 140.5092 | 50258 | 22 | 0.185115 | 0.000951 | 0.004472 |
| 15.1  | 100    | 54.1409  | 21548 | 35 | 0.011052 | 0.000951 | 0.004042 |
| 67.6  | 100    | 37.0119  | 12654 | 23 | 0.189246 | 0.000951 | 0.003983 |
| 2.5   | 100    | 135.767  | 52015 | 32 | 0.020259 | 0.000951 | 0.004405 |
| 23.8  | 100    | 137.4261 | 52717 | 54 | 0.000141 | 0.000951 | 0.003613 |
| 6.1   | 100    | 54.9924  | 18057 | 37 | 0.007532 | 0.001022 | 0.00552  |
| 85.2  | 39.718 | 35.5653  | 12092 | 37 | 0.007242 | 0.001022 | 0.004758 |
| 21.3  | 100    | 66.7662  | 22568 | 35 | 0.016659 | 0.001022 | 0.005471 |
| 22.7  | 100    | 67.1566  | 22717 | 38 | 0.006637 | 0.001022 | 0.005418 |
| 16.2  | 100    | 67.8019  | 22968 | 33 | 0.021232 | 0.001022 | 0.004897 |
| 34.7  | 100    | 84.5143  | 29531 | 39 | 0.004606 | 0.001022 | 0.004662 |
| 8.6   | 100    | 122.471  | 44953 | 25 | 0.137974 | 0.001022 | 0.005126 |
| 21.2  | 100    | 60.7382  | 20228 | 20 | 0.173318 | 0.001022 | 0.004905 |
| 55.3  | 40.931 | 62.9839  | 23125 | 40 | 0.000584 | 0.001114 | 0.006258 |
| 2.5   | 100    | 138.5257 | 51352 | 26 | 0.097649 | 0.001114 | 0.006118 |
| 6.6   | 100    | 136.7764 | 52426 | 29 | 0.037161 | 0.00121  | 0.006513 |
| 120.5 | 69.489 | 42.5541  | 16537 | 39 | 0.003756 | 0.001308 | 0.007005 |
| 50.3  | 3.921  | 66.7227  | 24312 | 45 | 0.001469 | 0.001308 | 0.006994 |
| 4.1   | 100    | 87.8372  | 32891 | 27 | 0.07483  | 0.00141  | 0.007288 |
| 0.4   | 100    | 139.9856 | 57224 | 30 | 0.017195 | 0.001498 | 0.007937 |
| 4.6   | 100    | 53.117   | 17440 | 36 | 0.009086 | 0.001498 | 0.008009 |
| 6.3   | 100    | 128.0288 | 49837 | 17 | 0.670611 | 0.001498 | 0.007902 |
| 15.8  | 100    | 65.207   | 23695 | 37 | 0.009046 | 0.001498 | 0.007907 |
| 17.9  | 100    | 61.5746  | 24741 | 38 | 0.001012 | 0.001498 | 0.007759 |
| 12.9  | 100    | 52.6928  | 17289 | 24 | 0.064478 | 0.001498 | 0.007755 |
| 35.7  | 18.102 | 82.6576  | 28793 | 41 | 0.000532 | 0.001576 | 0.008538 |
| 4.4   | 100    | 85.4011  | 31844 | 52 | 0.000149 | 0.001576 | 0.008754 |
| 40.3  | 100    | 33.3589  | 11268 | 20 | 0.354835 | 0.001576 | 0.008665 |
| 7.7   | 20.954 | 62.1237  | 24986 | 44 | 0.000264 | 0.001576 | 0.008479 |
| 2.3   | 100    | 134.1107 | 49486 | 29 | 0.035797 | 0.001576 | 0.008828 |
| 45.3  | 100    | 67.269   | 22760 | 36 | 0.012682 | 0.001576 | 0.008095 |
| 72.9  | 3.286  | 65.7098  | 23890 | 46 | 0.001183 | 0.001758 | 0.009198 |
| 99.8  | 100    | 36.068   | 12279 | 34 | 0.013179 | 0.001854 | 0.009917 |
| 3.9   | 100    | 85.9208  | 32062 | 51 | 0.000152 | 0.001854 | 0.009761 |
| 130.9 | 2.917  | 62.1471  | 24998 | 41 | 0.000439 | 0.001854 | 0.009914 |
| 17.1  | 100    | 67.9272  | 24783 | 37 | 0.009096 | 0.001854 | 0.009866 |
| 32.9  | 100    | 45.1457  | 15674 | 20 | 0.272583 | 0.001945 | 0.01022  |
| 10.6  | 100    | 88.2894  | 33091 | 34 | 0.012558 | 0.001945 | 0.01021  |
| 11.9  | 100    | 43.9343  | 17134 | 48 | 0.00044  | 0.002012 | 0.01031  |
| 34.8  | 100    | 31.6228  | 11976 | 32 | 0.016708 | 0.002012 | 0.0103   |
| 5.3   | 100    | 94.6691  | 35691 | 51 | 0.000164 | 0.002012 | 0.0111   |
| 62    | 100    | 45.4601  | 15799 | 17 | 0.552461 | 0.002012 | 0.011    |

|       |        |          |       |    |          |          |         |
|-------|--------|----------|-------|----|----------|----------|---------|
| 46.8  | 100    | 54.7858  | 18082 | 22 | 0.10581  | 0.002079 | 0.01146 |
| 36.8  | 100    | 53.0487  | 17417 | 33 | 0.017849 | 0.002079 | 0.01189 |
| 60.8  | 100    | 35.5009  | 12069 | 18 | 0.576036 | 0.002079 | 0.01205 |
| 26.2  | 100    | 33.7077  | 11399 | 25 | 0.124144 | 0.002079 | 0.01142 |
| 22.6  | 25.528 | 25.5516  | 9503  | 46 | 0.000677 | 0.002257 | 0.01254 |
| 18    | 100    | 56.8471  | 20815 | 32 | 0.02136  | 0.002257 | 0.01266 |
| 23.8  | 100    | 43.0258  | 15391 | 31 | 0.021678 | 0.002315 | 0.01296 |
| 0.4   | 100    | 131.8417 | 50338 | 43 | 0.002306 | 0.002315 | 0.0132  |
| 21.2  | 54.352 | 102.4054 | 37839 | 23 | 0.124651 | 0.002315 | 0.01381 |
| 84.4  | 4.078  | 66.6757  | 24291 | 44 | 0.001768 | 0.002315 | 0.01347 |
| 0     | 100    | 124.0644 | 45606 | 34 | 0.014186 | 0.002315 | 0.01307 |
| 13.4  | 100    | 68.9318  | 25183 | 33 | 0.021109 | 0.002315 | 0.01305 |
| 12.6  | 100    | 62.4787  | 20892 | 31 | 0.004788 | 0.002376 | 0.01457 |
| 95.1  | 15.728 | 25.6187  | 9531  | 40 | 0.002634 | 0.002376 | 0.01469 |
| 128.3 | 1.297  | 66.2198  | 24102 | 48 | 0.000678 | 0.002543 | 0.01579 |
| 0.3   | 100    | 78.8264  | 27951 | 34 | 0.00312  | 0.002777 | 0.018   |
| 0     | 100    | 97.1893  | 39869 | 17 | 0.300893 | 0.002777 | 0.01789 |
| 115.2 | 0.829  | 43.0564  | 16762 | 40 | 0.003019 | 0.002777 | 0.01811 |
| 37.8  | 42.407 | 101.9741 | 37655 | 40 | 0.002653 | 0.002777 | 0.0171  |
| 0.4   | 100    | 114.0468 | 41475 | 24 | 0.172026 | 0.002843 | 0.01905 |
| 0.6   | 100    | 126.0759 | 47880 | 38 | 0.005165 | 0.003096 | 0.02009 |
| 23.2  | 100    | 35.1914  | 13465 | 29 | 0.030268 | 0.003254 | 0.02083 |
| 38.7  | 100    | 43.1699  | 15285 | 17 | 0.694749 | 0.00337  | 0.02291 |
| 1.4   | 100    | 111.1143 | 41420 | 23 | 0.238878 | 0.00337  | 0.02241 |
| 9.8   | 100    | 41.6237  | 16125 | 42 | 0.000227 | 0.003674 | 0.02625 |
| 1.8   | 100    | 130.3295 | 49706 | 40 | 0.003438 | 0.003674 | 0.02592 |
| 29.1  | 100    | 40.0612  | 14282 | 14 | 1.436458 | 0.003736 | 0.02755 |
| 4.6   | 100    | 56.3518  | 20623 | 32 | 0.025404 | 0.003736 | 0.02709 |
| 195.6 | 0.664  | 135.3566 | 51831 | 60 | 3.4E-05  | 0.003892 | 0.0283  |
| 1.3   | 100    | 91.7314  | 34502 | 40 | 0.001924 | 0.003892 | 0.02824 |
| 5.2   | 100    | 62.6804  | 23004 | 22 | 0.034635 | 0.003967 | 0.02883 |
| 6.1   | 100    | 77.2632  | 28646 | 27 | 0.067655 | 0.004124 | 0.02959 |
| 13.5  | 100    | 56.4638  | 22541 | 34 | 0.001315 | 0.004266 | 0.03081 |
| 88    | 5.478  | 65.6598  | 23870 | 36 | 0.01097  | 0.004266 | 0.03113 |
| 10.8  | 100    | 67.662   | 22915 | 31 | 0.035261 | 0.004344 | 0.03156 |
| 2.1   | 100    | 131.3416 | 50132 | 43 | 0.001825 | 0.004344 | 0.03133 |
| 25.1  | 100    | 47.7771  | 16712 | 23 | 0.171201 | 0.004643 | 0.03308 |
| 128.9 | 1.049  | 62.0842  | 24968 | 41 | 0.000484 | 0.004643 | 0.03291 |
| 2.4   | 100    | 137.2805 | 52649 | 21 | 0.22342  | 0.004643 | 0.03307 |
| 8.1   | 100    | 44.715   | 17460 | 36 | 0.007668 | 0.004803 | 0.03402 |
| 17.3  | 100    | 61.5608  | 24735 | 29 | 0.00744  | 0.005031 | 0.03518 |
| 0.3   | 100    | 82.1865  | 30544 | 44 | 0.00081  | 0.005271 | 0.03577 |
| 34.2  | 100    | 53.2401  | 21177 | 44 | 0.001397 | 0.005618 | 0.0391  |
| 0.8   | 100    | 123.7647 | 48071 | 25 | 0.119856 | 0.00573  | 0.04053 |
| 4.9   | 100    | 96.686   | 39666 | 15 | 0.518614 | 0.00573  | 0.04153 |
| 35.8  | 20.436 | 41.1168  | 15912 | 29 | 0.004519 | 0.00573  | 0.04073 |
| 9.7   | 100    | 63.9882  | 23516 | 23 | 0.031648 | 0.005792 | 0.04282 |
| 6.7   | 100    | 44.0688  | 17190 | 24 | 0.128447 | 0.005865 | 0.04298 |
| 3.5   | 100    | 90.333   | 33941 | 18 | 0.255969 | 0.00599  | 0.04488 |
| 36.2  | 100    | 35.0666  | 11904 | 30 | 0.035703 | 0.006145 | 0.04573 |
| 14.8  | 100    | 100.1378 | 38068 | 44 | 0.00077  | 0.006299 | 0.04616 |
| 2.3   | 100    | 136.2705 | 52221 | 20 | 0.321903 | 0.006428 | 0.04787 |

|       |        |          |       |    |          |          |          |
|-------|--------|----------|-------|----|----------|----------|----------|
| 29.4  | 100    | 43.6154  | 15622 | 26 | 0.08239  | 0.006428 | 0.04685  |
| 27.3  | 100    | 41.7113  | 16164 | 31 | 0.021414 | 0.006721 | 0.04933  |
| 12.3  | 100    | 143.4775 | 55823 | 11 | 1.564357 | 0.007057 | 0.05223  |
| 0     | 100    | 114.5532 | 41682 | 15 | 1.401658 | 0.007213 | 0.05273  |
| 2.7   | 100    | 136.3871 | 50399 | 9  | 4.946416 | 0.00728  | 0.05315  |
| 9.4   | 100    | 41.9624  | 14996 | 31 | 0.002712 | 0.007836 | 0.05679  |
| 11    | 100    | 82.5131  | 29515 | 20 | 0.420932 | 0.007836 | 0.05586  |
| 1.3   | 100    | 89.9082  | 31722 | 20 | 0.487482 | 0.007836 | 0.05669  |
| 2.1   | 100    | 134.1319 | 49494 | 21 | 0.214706 | 0.007836 | 0.05694  |
| 38.7  | 100    | 40.4799  | 15660 | 24 | 0.108345 | 0.008171 | 0.05983  |
| 30.1  | 100    | 22.944   | 7368  | 31 | 0.029446 | 0.008293 | 0.0621   |
| 27    | 100    | 54.8363  | 20015 | 19 | 0.463939 | 0.008559 | 0.06449  |
| 1.3   | 100    | 114.0896 | 41495 | 18 | 0.737646 | 0.00861  | 0.06515  |
| 9.2   | 100    | 37.678   | 11720 | 22 | 0.2581   | 0.00861  | 0.06525  |
| 10.8  | 100    | 68.4295  | 24983 | 27 | 0.085399 | 0.008683 | 0.066    |
| 10.5  | 100    | 76.2335  | 28135 | 24 | 0.158379 | 0.008997 | 0.06834  |
| 4.6   | 100    | 41.4522  | 14809 | 32 | 0.002308 | 0.008997 | 0.06893  |
| 1.1   | 100    | 83.1757  | 29008 | 37 | 0.001708 | 0.009069 | 0.07042  |
| 2.4   | 100    | 86.6965  | 32389 | 17 | 0.745557 | 0.009587 | 0.07651  |
| 7.8   | 100    | 42.6407  | 16580 | 32 | 0.002029 | 0.009655 | 0.07675  |
| 15.6  | 100    | 48.7849  | 19228 | 27 | 0.006855 | 0.009764 | 0.0782   |
| 9.4   | 100    | 88.8636  | 33156 | 39 | 0.005638 | 0        | 0.000751 |
| 10.7  | 100    | 57.4758  | 19152 | 34 | 0.011095 | 0        | 0.000602 |
| 0     | 100    | 64.7841  | 23814 | 71 | 5.01E-07 | 0        | 2.15E-05 |
| 46.9  | 18.16  | 81.1781  | 30157 | 69 | 1.32E-06 | 0        | 3.56E-09 |
| 12.1  | 100    | 81.1326  | 30137 | 32 | 0.008393 | 0        | 0.000362 |
| 22.9  | 100    | 81.1025  | 30124 | 42 | 0.000716 | 0        | 0.000248 |
| 48.5  | 49.106 | 80.6766  | 29954 | 65 | 3.81E-06 | 0        | 3.8E-09  |
| 3.5   | 100    | 33.7473  | 10331 | 37 | 0.006874 | 0        | 0.001288 |
| 21.3  | 24.473 | 88.3388  | 36129 | 43 | 0.002338 | 0        | 0.000455 |
| 12    | 100    | 87.8289  | 35902 | 56 | 9.46E-05 | 0        | 2.63E-05 |
| 5.5   | 100    | 88.3799  | 36148 | 49 | 0.000502 | 0        | 0.00028  |
| 13.1  | 100    | 79.6086  | 32431 | 47 | 0.000256 | 0        | 2.11E-05 |
| 127.5 | 100    | 51.9961  | 18899 | 32 | 0.018841 | 0        | 0.001215 |
| 70.2  | 26.57  | 52.249   | 18999 | 64 | 1.23E-05 | 0        | 4.92E-05 |
| 45.3  | 100    | 52.5027  | 19093 | 43 | 0.001771 | 0        | 0.000127 |
| 12.3  | 34.842 | 75.6603  | 26065 | 63 | 8.84E-06 | 0        | 2.71E-05 |
| 32.8  | 47.462 | 75.644   | 26058 | 84 | 6.88E-08 | 0        | 5.43E-08 |
| 7.6   | 100    | 79.649   | 27606 | 57 | 3.37E-05 | 0        | 0.000202 |
| 18.6  | 100    | 75.1569  | 25868 | 39 | 0.002127 | 0        | 0.000497 |
| 5.8   | 100    | 80.0991  | 29723 | 49 | 0.000521 | 0        | 4.78E-05 |
| 11.5  | 100    | 14.8841  | 4130  | 56 | 3.55E-05 | 0        | 0.000336 |
| 18.6  | 31.388 | 74.7109  | 27516 | 64 | 5.96E-06 | 0        | 2.04E-05 |
| 9.5   | 21.383 | 74.7007  | 27512 | 60 | 1.44E-05 | 0        | 3.46E-05 |
| 4.2   | 100    | 80.4425  | 29856 | 41 | 0.003059 | 0        | 9.35E-06 |
| 4.5   | 100    | 80.4543  | 29860 | 30 | 0.044237 | 0        | 0.000825 |
| 10.8  | 72.615 | 87.2278  | 32615 | 47 | 0.000754 | 0        | 0.000176 |
| 55.3  | 25.13  | 87.1748  | 32592 | 47 | 0.000877 | 0        | 8.49E-05 |
| 14.3  | 100    | 80.6036  | 29920 | 54 | 0.000161 | 0        | 9.82E-08 |
| 26.2  | 100    | 46.8043  | 16331 | 53 | 0.000111 | 0        | 3.93E-05 |
| 7.6   | 100    | 49.6761  | 17476 | 63 | 1.12E-05 | 0        | 1.92E-06 |
| 11.2  | 57.774 | 65.3424  | 23749 | 47 | 0.000805 | 0        | 2.54E-06 |

|       |        |          |       |     |          |          |          |
|-------|--------|----------|-------|-----|----------|----------|----------|
| 52    | 27.254 | 64.9102  | 23573 | 29  | 0.049688 | 0        | 6.58E-06 |
| 15.1  | 6.807  | 64.8374  | 23540 | 57  | 7.66E-05 | 0        | 5.54E-07 |
| 3     | 100    | 64.3869  | 23354 | 40  | 0.004063 | 0        | 0.000811 |
| 11.3  | 100    | 66.1359  | 24067 | 29  | 0.046135 | 0        | 0.000496 |
| 2.1   | 100    | 117.3151 | 45327 | 66  | 9.84E-06 | 0        | 1.44E-05 |
| 26.3  | 83.957 | 117.2755 | 45309 | 83  | 2.3E-07  | 0        | 1.32E-08 |
| 124.5 | 100    | 15.8294  | 5005  | 39  | 0.003349 | 0        | 0.000112 |
| 30.7  | 100    | 34.8449  | 11951 | 22  | 0.154352 | 0        | 0.000694 |
| 42.9  | 44.98  | 35.3489  | 12141 | 52  | 0.00015  | 0        | 4.31E-06 |
| 2.4   | 100    | 114.1533 | 44463 | 40  | 0.001723 | 0        | 0.000294 |
| 7.7   | 100    | 33.7972  | 11200 | 45  | 0.000852 | 0        | 0.000106 |
| 33.5  | 80.289 | 141.0556 | 54466 | 111 | 1.72E-10 | 0        | 4.26E-13 |
| 14.5  | 100    | 58.332   | 23338 | 45  | 0.000884 | 0        | 0.000323 |
| 11.1  | 96.445 | 57.8286  | 23129 | 51  | 0.000196 | 0        | 3.88E-05 |
| 14.5  | 100    | 58.8411  | 23546 | 47  | 0.000507 | 0        | 0.000234 |
| 12.6  | 68.891 | 56.3108  | 22469 | 43  | 0.001385 | 0        | 0.000393 |
| 20.2  | 59.818 | 56.8188  | 22697 | 52  | 0.000169 | 0        | 0.000157 |
| 10.9  | 53.682 | 57.3208  | 22917 | 50  | 0.000244 | 0        | 6.43E-05 |
| 50.6  | 100    | 54.7071  | 21793 | 36  | 0.005904 | 0        | 4.56E-05 |
| 86.3  | 100    | 55.2155  | 22010 | 47  | 0.000508 | 0        | 3.31E-05 |
| 51.9  | 54.979 | 55.7231  | 22223 | 35  | 0.007821 | 0        | 0.000458 |
| 28.6  | 100    | 82.4451  | 30423 | 56  | 6.72E-05 | 0        | 2.56E-05 |
| 41    | 100    | 82.472   | 30435 | 51  | 0.000212 | 0        | 0.000487 |
| 25.3  | 100    | 81.9404  | 30225 | 40  | 0.002522 | 0        | 0.000408 |
| 75.4  | 100    | 80.9725  | 29817 | 49  | 0.000345 | 0        | 9.67E-05 |
| 77.3  | 15.859 | 81.4737  | 30033 | 54  | 0.000106 | 0        | 6.92E-05 |
| 115.6 | 17.76  | 81.4598  | 30027 | 48  | 0.00037  | 0        | 0.000562 |
| 8.2   | 100    | 86.6687  | 32377 | 37  | 0.007532 | 0.000141 | 0.001605 |
| 103.8 | 100    | 46.7941  | 16327 | 52  | 0.000141 | 0.000273 | 0.001881 |
| 70.6  | 100    | 67.2775  | 27172 | 50  | 0.00043  | 0.000407 | 0.002148 |
| 154.1 | 56.112 | 33.9418  | 11253 | 16  | 0.732627 | 0.000525 | 0.002572 |
| 73.6  | 70.057 | 81.9632  | 30236 | 45  | 0.00075  | 0.000525 | 0.002196 |
| 4.8   | 100    | 88.9362  | 33185 | 43  | 0.002373 | 0.000525 | 0.002425 |
| 48    | 100    | 55.9727  | 20473 | 49  | 0.000336 | 0.000758 | 0.002875 |
| 10.8  | 100    | 82.9798  | 30629 | 39  | 0.003703 | 0.000758 | 0.002957 |
| 8.7   | 100    | 34.2258  | 13055 | 8   | 6.094226 | 0.000868 | 0.003358 |
| 31.2  | 100    | 65.9175  | 23975 | 20  | 0.478068 | 0.000951 | 0.004343 |
| 9.6   | 100    | 47.2518  | 15163 | 38  | 0.004053 | 0.000951 | 0.004121 |
| 90.9  | 100    | 68.2649  | 25171 | 41  | 0.003169 | 0.001022 | 0.004763 |
| 63.9  | 100    | 33.9576  | 11599 | 18  | 0.431034 | 0.001022 | 0.004645 |
| 3.4   | 100    | 68.2491  | 24911 | 33  | 0.019496 | 0.001022 | 0.00575  |
| 10.5  | 100    | 93.3631  | 34897 | 38  | 0.006276 | 0.001022 | 0.004863 |
| 4.1   | 100    | 59.3479  | 23749 | 32  | 0.015433 | 0.001114 | 0.005976 |
| 6     | 100    | 81.1064  | 30120 | 23  | 0.203764 | 0.001114 | 0.005961 |
| 5.2   | 100    | 88.864   | 36344 | 31  | 0.029349 | 0.001308 | 0.006978 |
| 0     | 100    | 86.2921  | 35224 | 38  | 0.007545 | 0.001576 | 0.00877  |
| 58.8  | 5.609  | 12.9228  | 3517  | 54  | 9.87E-05 | 0.001576 | 0.008214 |
| 7.7   | 100    | 46.3004  | 16132 | 33  | 0.010832 | 0.001758 | 0.009329 |
| 1.4   | 100    | 57.2152  | 20957 | 26  | 0.064223 | 0.001758 | 0.00914  |
| 140.2 | 17.404 | 55.6868  | 20362 | 48  | 0.000356 | 0.001758 | 0.009187 |
| 39.1  | 100    | 35.0588  | 12034 | 14  | 1.103304 | 0.001758 | 0.009582 |
| 147   | 100    | 19.2207  | 5971  | 21  | 0.122775 | 0.001854 | 0.009912 |



|       |        |          |       |    |          |          |          |
|-------|--------|----------|-------|----|----------|----------|----------|
| 2.3   | 100    | 35.3891  | 12159 | 35 | 0.008685 | 0.001945 | 0.009971 |
| 16.2  | 100    | 47.4328  | 17103 | 31 | 0.020349 | 0.002012 | 0.01126  |
| 1.1   | 100    | 89.131   | 33258 | 27 | 0.076448 | 0.002079 | 0.01183  |
| 60.3  | 17.351 | 66.7677  | 26947 | 41 | 0.003276 | 0.002079 | 0.01191  |
| 36.6  | 100    | 47.2616  | 15167 | 39 | 0.002909 | 0.002079 | 0.01173  |
| 0.9   | 100    | 36.87    | 11410 | 20 | 0.416893 | 0.002257 | 0.0127   |
| 1.3   | 100    | 14.9109  | 4139  | 40 | 0.001427 | 0.002315 | 0.01373  |
| 13.4  | 100    | 59.4806  | 21791 | 29 | 0.033294 | 0.002376 | 0.01447  |
| 16.3  | 100    | 72.0976  | 26714 | 31 | 0.021621 | 0.002376 | 0.01432  |
| 9.1   | 100    | 57.7237  | 21152 | 24 | 0.088478 | 0.002376 | 0.01509  |
| 114.9 | 38.485 | 12.9948  | 3519  | 54 | 9.88E-05 | 0.002543 | 0.01607  |
| 24.2  | 100    | 59.9358  | 24007 | 25 | 0.079348 | 0.002543 | 0.01627  |
| 11.5  | 100    | 54.2041  | 21576 | 19 | 0.266582 | 0.002719 | 0.01679  |
| 8.1   | 100    | 80.6278  | 29934 | 24 | 0.054755 | 0.002777 | 0.01749  |
| 18.5  | 100    | 54.1349  | 21545 | 25 | 0.08806  | 0.002843 | 0.01852  |
| 21.2  | 100    | 46.2893  | 16128 | 29 | 0.03098  | 0.002843 | 0.01843  |
| 22.6  | 100    | 54.3713  | 21649 | 19 | 0.316291 | 0.003096 | 0.01982  |
| 8.1   | 54.226 | 63.1283  | 25400 | 45 | 0.001421 | 0.003178 | 0.02064  |
| 1.3   | 100    | 35.2379  | 13486 | 22 | 0.249065 | 0.00337  | 0.02348  |
| 2     | 100    | 80.7573  | 30542 | 22 | 0.160893 | 0.00337  | 0.02312  |
| 13.7  | 100    | 42.4747  | 15186 | 35 | 0.010557 | 0.003533 | 0.02455  |
| 30.3  | 100    | 113.1197 | 44035 | 14 | 0.383236 | 0.003674 | 0.02505  |
| 71.5  | 6.802  | 59.3347  | 21738 | 35 | 0.009383 | 0.003674 | 0.02543  |
| 2.3   | 100    | 50.7778  | 16467 | 14 | 0.972369 | 0.005031 | 0.03479  |
| 1.1   | 100    | 65.0788  | 23645 | 23 | 0.246861 | 0.005031 | 0.03484  |
| 4.6   | 100    | 56.7106  | 20762 | 20 | 0.269228 | 0.005404 | 0.03755  |
| 18.6  | 100    | 66.2622  | 26730 | 29 | 0.05023  | 0.005618 | 0.03834  |
| 36.3  | 100    | 68.3093  | 25192 | 26 | 0.116099 | 0.00599  | 0.04526  |
| 1.5   | 100    | 63.8827  | 23154 | 24 | 0.163686 | 0.006497 | 0.04832  |
| 29.5  | 20.658 | 66.8053  | 26963 | 26 | 0.110004 | 0.007572 | 0.05449  |
| 1     | 100    | 58.2253  | 21339 | 18 | 0.370414 | 0.0081   | 0.05937  |
| 33.5  | 100    | 67.8025  | 24994 | 22 | 0.31643  | 0.008171 | 0.05976  |
| 1.2   | 100    | 33.8323  | 11214 | 21 | 0.20071  | 0.00822  | 0.06038  |
| 1.6   | 100    | 62.3675  | 21071 | 14 | 1.925225 | 0.00861  | 0.06536  |
| 16    | 100    | 58.858   | 19541 | 29 | 0.035087 | 0.008746 | 0.06654  |
| 2.6   | 100    | 58.7429  | 21522 | 11 | 2.207159 | 0.008997 | 0.06886  |
| 2.5   | 100    | 58.727   | 21516 | 16 | 0.661512 | 0.008997 | 0.0684   |
| 67.2  | 100    | 80.9559  | 29809 | 28 | 0.042216 | 0.009436 | 0.07142  |
| 4.9   | 100    | 33.6106  | 10285 | 12 | 2.488187 | 0.009498 | 0.072    |
| 7.3   | 100    | 56.2085  | 20567 | 11 | 1.921057 | 0.009985 | 0.08299  |
| 4.3   | 100    | 88.2637  | 32922 | 84 | 1.15E-07 | 0        | 9.04E-08 |
| 29.3  | 100    | 52.0353  | 18914 | 48 | 0.000654 | 0        | 8.48E-05 |
| 40.4  | 100    | 51.9262  | 18873 | 54 | 0.000148 | 0        | 7.34E-06 |
| 41.8  | 48.083 | 53.4567  | 19467 | 33 | 0.009635 | 0        | 0.000101 |
| 42.3  | 62.819 | 52.9523  | 19263 | 25 | 0.057544 | 0        | 0.00031  |
| 35.9  | 100    | 52.4475  | 19071 | 28 | 0.030414 | 0        | 0.000159 |
| 2.1   | 100    | 72.2517  | 24683 | 55 | 6.18E-05 | 0        | 0.000789 |
| 34    | 100    | 86.5791  | 30347 | 50 | 0.000342 | 0        | 0.000144 |
| 73.2  | 27.205 | 85.3642  | 29851 | 62 | 3.03E-05 | 0        | 3.63E-05 |
| 13.9  | 21.666 | 76.8212  | 28374 | 65 | 1.39E-05 | 0        | 4.05E-06 |
| 9.1   | 12.278 | 140.5223 | 55223 | 58 | 6.4E-05  | 0        | 0.000133 |
| 168.4 | 6.779  | 140.5198 | 55220 | 74 | 1.64E-06 | 0        | 8.21E-07 |

|       |        |          |       |    |          |          |          |
|-------|--------|----------|-------|----|----------|----------|----------|
| 80    | 30.625 | 31.7674  | 10744 | 26 | 0.103131 | 0        | 0.00013  |
| 5.3   | 100    | 131.2485 | 50092 | 49 | 0.000285 | 0        | 6.7E-06  |
| 60.9  | 100    | 65.5531  | 23902 | 49 | 0.000551 | 0        | 0.000515 |
| 16.3  | 100    | 50.2957  | 17682 | 47 | 0.000591 | 0        | 0.000496 |
| 111   | 12.736 | 40.7156  | 13866 | 45 | 0.000938 | 0        | 8.81E-05 |
| 12.5  | 100    | 69.6995  | 28231 | 30 | 0.005385 | 0        | 0.000554 |
| 31.9  | 100    | 84.2945  | 30227 | 60 | 3.11E-05 | 0        | 2.02E-05 |
| 15.5  | 100    | 84.3149  | 30236 | 55 | 0.0001   | 0        | 6.36E-05 |
| 250.8 | 13.883 | 13.1112  | 3649  | 38 | 0.001856 | 0        | 2.3E-05  |
| 88.1  | 18.753 | 13.1128  | 3651  | 33 | 0.005872 | 0        | 0.000254 |
| 37.6  | 100    | 27.3783  | 10235 | 41 | 0.003181 | 0        | 0.000351 |
| 18.2  | 100    | 39.4647  | 15232 | 42 | 0.002383 | 0        | 6.82E-05 |
| 18.6  | 100    | 53.102   | 19320 | 28 | 0.030735 | 0.000407 | 0.002137 |
| 2     | 100    | 19.3521  | 5683  | 55 | 2.94E-05 | 0.000525 | 0.002646 |
| 18.4  | 100    | 53.6079  | 19529 | 25 | 0.062158 | 0.000525 | 0.0024   |
| 62.5  | 100    | 15.4622  | 4794  | 29 | 0.044034 | 0.000758 | 0.003152 |
| 14    | 100    | 28.2021  | 9800  | 37 | 0.007644 | 0.000868 | 0.003528 |
| 18.2  | 100    | 60.4777  | 22157 | 29 | 0.031315 | 0.000868 | 0.00342  |
| 29.6  | 100    | 48.1427  | 18934 | 49 | 0.000499 | 0.000951 | 0.004367 |
| 111.8 | 100    | 33.3955  | 11381 | 40 | 0.002499 | 0.001022 | 0.004847 |
| 63.9  | 100    | 33.9767  | 12063 | 31 | 0.032022 | 0.001022 | 0.005631 |
| 46.6  | 100    | 52.611   | 18648 | 30 | 0.032244 | 0.001022 | 0.004982 |
| 105.6 | 54.927 | 33.4913  | 12750 | 26 | 0.131544 | 0.00121  | 0.006742 |
| 5.2   | 100    | 84.9916  | 29711 | 32 | 0.030724 | 0.00121  | 0.006842 |
| 8.5   | 100    | 76.8931  | 28405 | 39 | 0.005319 | 0.00121  | 0.006758 |
| 9.6   | 100    | 86.9101  | 30489 | 35 | 0.010059 | 0.001576 | 0.008409 |
| 19.7  | 100    | 39.9652  | 15439 | 17 | 0.739766 | 0.001758 | 0.009499 |
| 33    | 100    | 40.2115  | 13667 | 32 | 0.023773 | 0.001945 | 0.009945 |
| 18.4  | 100    | 46.7101  | 16725 | 42 | 0.000522 | 0.002012 | 0.01082  |
| 52.7  | 100    | 42.6124  | 15056 | 30 | 0.029448 | 0.002079 | 0.01137  |
| 14.7  | 100    | 83.8082  | 30023 | 25 | 0.095181 | 0.002315 | 0.0135   |
| 9     | 100    | 52.5951  | 19130 | 21 | 0.156925 | 0.002376 | 0.01475  |
| 21.2  | 100    | 42.6062  | 16563 | 31 | 0.02802  | 0.002543 | 0.01571  |
| 21.2  | 100    | 42.6062  | 16563 | 31 | 0.02802  | 0.002543 | 0.01571  |
| 10.3  | 100    | 15.5326  | 4358  | 22 | 0.133901 | 0.002543 | 0.01582  |
| 32.4  | 100    | 45.3866  | 16200 | 36 | 0.009491 | 0.002719 | 0.01655  |
| 62.8  | 91.571 | 47.6405  | 18710 | 32 | 0.025557 | 0.002777 | 0.01724  |
| 5.6   | 100    | 86.4051  | 30268 | 30 | 0.035838 | 0.002777 | 0.01746  |
| 37.9  | 100    | 47.6071  | 18694 | 36 | 0.009152 | 0.009498 | 0.0721   |
| 26.5  | 100    | 51.1415  | 16701 | 26 | 0.089474 | 0        | 0.001526 |
| 2.5   | 100    | 87.4667  | 32588 | 17 | 0.791041 | 0        | 0.000123 |
| 12.7  | 100    | 87.263   | 32508 | 12 | 2.622911 | 0        | 0.000246 |
| 14.9  | 100    | 86.9601  | 32386 | 12 | 2.587306 | 0        | 0.000267 |
| 0.3   | 67.398 | 51.384   | 16790 | 85 | 1.14E-07 | 0        | 2.85E-08 |
| 8     | 100    | 101.7262 | 38275 | 16 | 1.00906  | 0        | 0.000642 |
| 24    | 100    | 103.7345 | 39036 | 40 | 0.003876 | 0        | 1.03E-08 |
| 1.5   | 100    | 103.4284 | 38929 | 26 | 0.090676 | 0        | 9.05E-05 |
| 38.2  | 83.296 | 103.2323 | 38856 | 48 | 0.000594 | 0        | 2.25E-10 |
| 6.3   | 100    | 102.9209 | 38741 | 32 | 0.026003 | 0        | 7.67E-07 |
| 35.1  | 68.954 | 102.7305 | 38668 | 37 | 0.006978 | 0        | 4.14E-09 |
| 16.6  | 100    | 94.4616  | 35337 | 16 | 0.855437 | 0        | 0.000665 |
| 0.4   | 100    | 40.1915  | 12573 | 49 | 0.000601 | 0        | 5.35E-05 |

|      |        |          |       |     |          |   |          |
|------|--------|----------|-------|-----|----------|---|----------|
| 0.9  | 100    | 40.6975  | 12753 | 59  | 6.03E-05 | 0 | 1.23E-06 |
| 15.9 | 100    | 14.414   | 3989  | 38  | 0.004225 | 0 | 0.00079  |
| 52.6 | 50.898 | 106.2802 | 43664 | 69  | 5.6E-06  | 0 | 1.72E-06 |
| 8.4  | 33.489 | 106.2656 | 43657 | 45  | 0.001403 | 0 | 0.000436 |
| 7.7  | 38.216 | 85.7002  | 34965 | 65  | 1.37E-05 | 0 | 3.81E-05 |
| 52.2 | 15.131 | 85.6641  | 34948 | 78  | 8.16E-07 | 0 | 2.09E-08 |
| 19.3 | 100    | 82.7527  | 33708 | 67  | 8.44E-06 | 0 | 3.57E-05 |
| 4.4  | 100    | 99.8987  | 41043 | 27  | 0.078815 | 0 | 2.96E-05 |
| 24.3 | 98.446 | 99.8404  | 41016 | 36  | 0.009534 | 0 | 2.96E-08 |
| 13.9 | 100    | 105.7682 | 43434 | 48  | 0.000734 | 0 | 0.000413 |
| 1.8  | 100    | 62.0562  | 20946 | 35  | 0.013453 | 0 | 0.000114 |
| 8.8  | 100    | 63.0704  | 21357 | 84  | 1.89E-07 | 0 | 8.39E-10 |
| 23.3 | 47.068 | 62.7109  | 21214 | 68  | 7.24E-06 | 0 | 3.06E-08 |
| 18.3 | 100    | 62.2105  | 21010 | 58  | 7.1E-05  | 0 | 9.33E-08 |
| 19.9 | 8.216  | 62.5619  | 21153 | 86  | 1.02E-07 | 0 | 1.22E-10 |
| 16.1 | 100    | 62.6609  | 21195 | 95  | 1.38E-08 | 0 | 5.09E-10 |
| 15.3 | 100    | 50.7872  | 18426 | 40  | 0.004344 | 0 | 0.000387 |
| 10.7 | 100    | 50.2839  | 18237 | 36  | 0.012022 | 0 | 0.000119 |
| 35.6 | 100    | 14.2661  | 4032  | 63  | 1.26E-05 | 0 | 5.81E-08 |
| 18.1 | 100    | 23.5563  | 8051  | 51  | 0.000221 | 0 | 1.01E-05 |
| 40.9 | 100    | 23.0527  | 7853  | 70  | 2.73E-06 | 0 | 1.51E-09 |
| 1.5  | 100    | 56.0637  | 18475 | 86  | 9.01E-08 | 0 | 3.41E-07 |
| 0    | 100    | 55.6253  | 18311 | 86  | 9.82E-08 | 0 | 4.19E-07 |
| 0    | 12.332 | 55.5601  | 18286 | 92  | 2.17E-08 | 0 | 2.52E-08 |
| 20.7 | 100    | 55.3843  | 18219 | 33  | 0.018359 | 0 | 0.001144 |
| 6.6  | 100    | 67.9363  | 23019 | 66  | 9.9E-06  | 0 | 1.13E-08 |
| 0    | 100    | 67.4348  | 22824 | 53  | 0.000207 | 0 | 7.1E-05  |
| 4.2  | 100    | 88.4092  | 31101 | 40  | 0.004277 | 0 | 0.001191 |
| 24.4 | 100    | 87.9777  | 30930 | 33  | 0.024029 | 0 | 0.000219 |
| 21.2 | 100    | 87.8113  | 30863 | 71  | 3.51E-06 | 0 | 1.8E-08  |
| 7    | 100    | 87.3071  | 30655 | 63  | 2.5E-05  | 0 | 6.81E-06 |
| 19.6 | 100    | 77.4948  | 28674 | 46  | 0.00102  | 0 | 0.000762 |
| 20.6 | 100    | 76.4836  | 28239 | 61  | 2.98E-05 | 0 | 0.000094 |
| 49.4 | 9.736  | 76.329   | 28178 | 40  | 0.003997 | 0 | 0.000354 |
| 5.1  | 100    | 13.5793  | 3687  | 52  | 8.44E-05 | 0 | 0.000113 |
| 14   | 100    | 14.4892  | 3991  | 41  | 0.002263 | 0 | 4.68E-05 |
| 51.6 | 26.766 | 75.9808  | 28026 | 53  | 0.000206 | 0 | 0.000197 |
| 8.3  | 100    | 19.3134  | 5669  | 47  | 0.00069  | 0 | 0.001014 |
| 8.3  | 100    | 19.3134  | 5669  | 47  | 0.00069  | 0 | 0.001014 |
| 23.3 | 100    | 47.3657  | 16554 | 40  | 0.004355 | 0 | 1.6E-05  |
| 1.9  | 100    | 126.6601 | 49258 | 42  | 0.00273  | 0 | 0.000177 |
| 2.7  | 100    | 126.2819 | 49109 | 34  | 0.016495 | 0 | 9.09E-05 |
| 9.3  | 100    | 119.3628 | 46169 | 66  | 1.09E-05 | 0 | 1.44E-05 |
| 17.5 | 100    | 118.3888 | 45757 | 58  | 6.48E-05 | 0 | 8.12E-06 |
| 50.1 | 72.22  | 140.7044 | 52388 | 89  | 5.84E-08 | 0 | 1.84E-09 |
| 2.8  | 49.333 | 116.1439 | 44850 | 100 | 4.75E-09 | 0 | 8.46E-11 |
| 2.7  | 30.742 | 115.6983 | 44644 | 82  | 2.7E-07  | 0 | 1.11E-08 |
| 53.9 | 100    | 115.6781 | 44634 | 51  | 0.000397 | 0 | 9.68E-09 |
| 9.3  | 5.717  | 115.6349 | 44618 | 90  | 4.78E-08 | 0 | 3.11E-11 |
| 10   | 100    | 98.0111  | 37706 | 44  | 0.001249 | 0 | 0.000721 |
| 26.9 | 85.727 | 97.7074  | 37568 | 77  | 6.45E-07 | 0 | 3.09E-07 |
| 49.1 | 6.742  | 97.5008  | 37475 | 84  | 1.2E-07  | 0 | 2.55E-07 |

|       |        |          |       |     |          |          |          |
|-------|--------|----------|-------|-----|----------|----------|----------|
| 9     | 100    | 97.2056  | 37338 | 52  | 0.000197 | 0        | 4.49E-05 |
| 163.1 | 100    | 14.1025  | 4113  | 63  | 1.33E-05 | 0        | 1.03E-06 |
| 55.8  | 100    | 31.4584  | 10613 | 32  | 0.016857 | 0        | 0.001221 |
| 131   | 100    | 140.7123 | 54255 | 93  | 2.16E-08 | 0        | 1.1E-10  |
| 42.8  | 100    | 18.1037  | 6174  | 24  | 0.13574  | 0        | 0.001011 |
| 329   | 100    | 140.3491 | 54066 | 72  | 2.8E-06  | 0        | 3.39E-06 |
| 0.9   | 100    | 140.4503 | 54549 | 21  | 0.141075 | 0        | 0.000971 |
| 51.8  | 91.289 | 61.6859  | 22316 | 51  | 0.000314 | 0        | 0.000497 |
| 21.4  | 100    | 20.0497  | 6073  | 40  | 0.001979 | 0        | 7E-05    |
| 26    | 100    | 16.9444  | 4989  | 59  | 2.36E-05 | 0        | 8.1E-06  |
| 66.1  | 32.228 | 17.445   | 5170  | 76  | 5.4E-07  | 0        | 2.6E-07  |
| 31    | 100    | 17.4665  | 5180  | 54  | 8.08E-05 | 0        | 6.4E-05  |
| 22.2  | 100    | 18.0275  | 5378  | 35  | 0.006873 | 0        | 0.000522 |
| 30    | 57.993 | 63.2153  | 22946 | 103 | 1.35E-09 | 0        | 8.94E-06 |
| 14.8  | 100    | 23.758   | 7408  | 34  | 0.007932 | 0        | 0.000774 |
| 35.9  | 100    | 43.9247  | 15109 | 33  | 0.007213 | 0        | 0.000712 |
| 14.1  | 100    | 26.8166  | 8537  | 49  | 0.000325 | 0        | 0.000522 |
| 37.7  | 100    | 24.2753  | 7593  | 44  | 0.00085  | 0        | 5.36E-05 |
| 45.1  | 100    | 26.7961  | 8528  | 52  | 0.00017  | 0        | 6.18E-06 |
| 12    | 100    | 48.2868  | 19003 | 31  | 0.036752 | 0        | 0.001414 |
| 13.3  | 100    | 48.791   | 19231 | 29  | 0.056589 | 0        | 0.000868 |
| 65.7  | 100    | 47.7785  | 18773 | 51  | 0.000371 | 0        | 5.44E-06 |
| 12.6  | 100    | 47.2711  | 18561 | 45  | 0.001341 | 0        | 7.73E-05 |
| 23.2  | 100    | 142.8452 | 49719 | 93  | 2.27E-08 | 0        | 7.44E-11 |
| 27.6  | 8.125  | 141.5811 | 54779 | 78  | 6.17E-07 | 0        | 4.43E-07 |
| 41.2  | 100    | 58.6526  | 23469 | 48  | 0.000469 | 0        | 5.07E-05 |
| 42.3  | 100    | 81.7974  | 29225 | 24  | 0.163686 | 0        | 0.000119 |
| 167.7 | 45.661 | 141.2345 | 54580 | 67  | 3.54E-06 | 0        | 5E-07    |
| 123.7 | 19.485 | 141.582  | 54780 | 92  | 2.8E-08  | 0        | 1.88E-11 |
| 10    | 100    | 84.0714  | 30130 | 52  | 0.000307 | 0        | 0.000241 |
| 66.6  | 100    | 24.3712  | 7820  | 45  | 0.000405 | 0        | 0.000917 |
| 18.6  | 100    | 33.1661  | 12615 | 34  | 0.017238 | 0        | 0.000133 |
| 9.4   | 100    | 33.7631  | 12861 | 36  | 0.01122  | 0        | 0.000887 |
| 77    | 100    | 18.2317  | 5497  | 46  | 0.000504 | 0        | 3.63E-05 |
| 23.9  | 100    | 33.913   | 12926 | 72  | 2.35E-06 | 0        | 3.67E-05 |
| 38.6  | 100    | 33.9206  | 12929 | 66  | 9.41E-06 | 0        | 6.89E-05 |
| 1.2   | 100    | 113.3686 | 43637 | 43  | 0.001904 | 0.000141 | 0.001652 |
| 0.4   | 100    | 127.6662 | 49675 | 34  | 0.015995 | 0.000273 | 0.001905 |
| 12.8  | 100    | 71.2443  | 26100 | 34  | 0.017767 | 0.000758 | 0.002935 |
| 6.3   | 100    | 118.2843 | 43262 | 26  | 0.096205 | 0.000758 | 0.002885 |
| 17    | 100    | 34.7112  | 13257 | 39  | 0.004818 | 0.000758 | 0.002808 |
| 1.5   | 100    | 63.5763  | 21552 | 28  | 0.06155  | 0.000951 | 0.00383  |
| 2.8   | 100    | 120.4159 | 46621 | 30  | 0.034451 | 0.000951 | 0.004455 |
| 0.4   | 77.332 | 129.4178 | 53111 | 53  | 0.000221 | 0.000951 | 0.003649 |
| 12.3  | 100    | 87.4713  | 30719 | 9   | 5.966362 | 0.001022 | 0.004628 |
| 0.5   | 100    | 115.1232 | 44390 | 28  | 0.069616 | 0.001022 | 0.004618 |
| 1.9   | 100    | 64.2419  | 21818 | 24  | 0.186634 | 0.001022 | 0.004829 |
| 3.7   | 100    | 101.223  | 38069 | 8   | 5.456405 | 0.00121  | 0.006485 |
| 1.2   | 100    | 50.1647  | 16228 | 26  | 0.100855 | 0.001308 | 0.006983 |
| 4.1   | 100    | 104.2366 | 39218 | 8   | 5.852499 | 0.001308 | 0.007071 |
| 29.5  | 100    | 14.0849  | 4035  | 32  | 0.006553 | 0.001576 | 0.008342 |
| 22    | 16.623 | 33.9319  | 12933 | 33  | 0.01926  | 0.001945 | 0.01023  |

|       |        |          |       |    |          |          |          |
|-------|--------|----------|-------|----|----------|----------|----------|
| 47.2  | 100    | 18.7049  | 6476  | 13 | 1.903651 | 0.002012 | 0.01085  |
| 32.9  | 100    | 138.3405 | 53136 | 30 | 0.035208 | 0.002012 | 0.01065  |
| 48.2  | 100    | 61.6416  | 22298 | 45 | 0.001243 | 0.002079 | 0.01228  |
| 19.3  | 100    | 139.2449 | 53543 | 19 | 0.450187 | 0.002315 | 0.01351  |
| 0     | 100    | 51.8867  | 16987 | 29 | 0.046419 | 0.002376 | 0.01421  |
| 3.3   | 100    | 66.0321  | 24303 | 35 | 0.01562  | 0.002376 | 0.01496  |
| 0     | 100    | 49.2639  | 15890 | 26 | 0.088442 | 0.002376 | 0.01487  |
| 0.8   | 100    | 126.1516 | 49056 | 20 | 0.38645  | 0.002543 | 0.0157   |
| 11.5  | 100    | 60.4178  | 20301 | 23 | 0.20051  | 0.002543 | 0.01551  |
| 0     | 100    | 116.6451 | 45057 | 24 | 0.205381 | 0.003096 | 0.01994  |
| 0     | 100    | 93.4311  | 35732 | 36 | 0.004838 | 0.003178 | 0.02056  |
| 9.7   | 100    | 43.2678  | 16848 | 31 | 0.032121 | 0.003178 | 0.02039  |
| 8.3   | 100    | 40.2034  | 12578 | 19 | 0.550745 | 0.003178 | 0.02077  |
| 2.5   | 100    | 40.7077  | 12757 | 21 | 0.32207  | 0.003533 | 0.02457  |
| 3     | 100    | 119.8676 | 46386 | 23 | 0.184104 | 0.003674 | 0.02611  |
| 17.4  | 100    | 14.5873  | 4201  | 27 | 0.018    | 0.003736 | 0.02678  |
| 0     | 100    | 85.1919  | 34733 | 28 | 0.071566 | 0.003967 | 0.02888  |
| 0.7   | 100    | 127.1651 | 49466 | 15 | 1.178295 | 0.004266 | 0.03074  |
| 1.3   | 100    | 49.1685  | 15932 | 18 | 0.579733 | 0.005618 | 0.03886  |
| 0     | 100    | 51.0053  | 16647 | 23 | 0.180839 | 0.00573  | 0.04007  |
| 5.1   | 100    | 71.2605  | 26106 | 19 | 0.52816  | 0.006926 | 0.05023  |
| 2.4   | 100    | 87.7686  | 32717 | 3  | 17.59967 | 0.008171 | 0.05981  |
| 4.4   | 100    | 133.6641 | 51105 | 22 | 0.256158 | 0.008997 | 0.06891  |
| 4.2   | 100    | 127.3807 | 49552 | 11 | 3.265314 | 0.009914 | 0.08191  |
| 39.4  | 100    | 121.93   | 45538 | 87 | 7.9E-08  | 0        | 9.97E-12 |
| 6.8   | 100    | 89.2092  | 33286 | 71 | 2.48E-06 | 0        | 4.07E-07 |
| 6.1   | 100    | 88.7031  | 33097 | 69 | 4.03E-06 | 0        | 1.14E-07 |
| 8     | 100    | 89.7123  | 33478 | 59 | 4.04E-05 | 0        | 6.72E-08 |
| 10.4  | 100    | 90.2221  | 33692 | 57 | 7.53E-05 | 0        | 4.94E-07 |
| 155.7 | 100    | 51.6706  | 16903 | 33 | 0.021573 | 0        | 0.000841 |
| 101.6 | 13.78  | 52.0198  | 17036 | 45 | 0.001327 | 0        | 8.27E-05 |
| 99    | 2.658  | 51.5128  | 16840 | 55 | 0.00015  | 0        | 2.34E-05 |
| 69.1  | 68.478 | 51.6422  | 16893 | 59 | 6.03E-05 | 0        | 9.96E-06 |
| 2.8   | 100    | 98.7122  | 37010 | 46 | 0.001167 | 0        | 0.00026  |
| 61.5  | 100    | 37.3077  | 11564 | 38 | 0.006372 | 0        | 0.000191 |
| 18.3  | 100    | 37.6785  | 11696 | 25 | 0.163877 | 0        | 0.000878 |
| 50.3  | 100    | 121.4261 | 45361 | 76 | 8.74E-07 | 0        | 8.54E-11 |
| 42.9  | 70.256 | 121.0487 | 45232 | 58 | 5.62E-05 | 0        | 5.98E-09 |
| 51.4  | 69.949 | 120.9254 | 45188 | 65 | 1.11E-05 | 0        | 8.87E-12 |
| 49.1  | 57.846 | 120.5445 | 45054 | 54 | 0.000166 | 0        | 2.12E-09 |
| 46.1  | 49.483 | 120.0432 | 44874 | 58 | 5.82E-05 | 0        | 2.74E-09 |
| 67    | 44.046 | 119.9216 | 44830 | 88 | 5.35E-08 | 0        | 6.2E-13  |
| 52.2  | 62.38  | 120.4253 | 45010 | 89 | 5.03E-08 | 0        | 1.74E-12 |
| 39.9  | 100    | 121.5518 | 45408 | 48 | 0.000596 | 0        | 1.6E-08  |
| 25.8  | 100    | 122.0556 | 45584 | 59 | 5.15E-05 | 0        | 4.96E-09 |
| 4.3   | 100    | 123.0669 | 45938 | 27 | 0.080297 | 0        | 0.001197 |
| 5.7   | 100    | 122.9347 | 45892 | 46 | 0.00085  | 0        | 0.000166 |
| 14.3  | 100    | 122.5606 | 45763 | 56 | 8.44E-05 | 0        | 1.82E-07 |
| 16.6  | 100    | 122.4328 | 45715 | 81 | 2.88E-07 | 0        | 1.18E-09 |
| 40.6  | 37.311 | 119.5373 | 44685 | 58 | 5.8E-05  | 0        | 5.37E-09 |
| 39    | 35.648 | 119.0335 | 44497 | 58 | 5.4E-05  | 0        | 2.93E-09 |
| 49.3  | 38.671 | 119.0137 | 44489 | 76 | 9.06E-07 | 0        | 1.06E-11 |

|       |        |          |       |     |          |   |          |
|-------|--------|----------|-------|-----|----------|---|----------|
| 44.2  | 35.984 | 118.5288 | 44319 | 60  | 3.35E-05 | 0 | 2.27E-09 |
| 64.2  | 41.92  | 118.5122 | 44312 | 101 | 2.64E-09 | 0 | 1.13E-13 |
| 2.2   | 100    | 139.8766 | 51716 | 35  | 0.010682 | 0 | 0.000612 |
| 16.6  | 100    | 14.7521  | 4112  | 33  | 0.009638 | 0 | 1.6E-05  |
| 29.2  | 100    | 14.7305  | 4104  | 18  | 0.329611 | 0 | 0.000468 |
| 4.4   | 100    | 79.6781  | 32459 | 49  | 0.000299 | 0 | 0.000247 |
| 3.2   | 100    | 79.177   | 32248 | 50  | 0.000217 | 0 | 0.000353 |
| 3.3   | 100    | 78.0276  | 31770 | 54  | 8.55E-05 | 0 | 0.000256 |
| 13    | 100    | 43.9034  | 15735 | 51  | 0.000333 | 0 | 0.001273 |
| 67.5  | 100    | 14.623   | 4185  | 23  | 0.093447 | 0 | 0.000119 |
| 31.6  | 100    | 14.6208  | 4184  | 40  | 0.001835 | 0 | 4.11E-06 |
| 58.3  | 100    | 55.4254  | 18234 | 34  | 0.016423 | 0 | 0.001469 |
| 28.9  | 100    | 44.9799  | 14308 | 40  | 0.003042 | 0 | 0.000473 |
| 49.8  | 100    | 45.4829  | 14493 | 33  | 0.01413  | 0 | 0.00077  |
| 128   | 84.621 | 77.5869  | 28717 | 72  | 1.8E-06  | 0 | 1.05E-05 |
| 51    | 9.48   | 78.0934  | 28948 | 100 | 3.09E-09 | 0 | 5.09E-07 |
| 18.3  | 61.043 | 140.8653 | 52475 | 78  | 6.96E-07 | 0 | 6.52E-10 |
| 27.5  | 100    | 139.8537 | 54895 | 45  | 0.001077 | 0 | 1.05E-06 |
| 47.6  | 100    | 140.5379 | 52290 | 64  | 1.79E-05 | 0 | 1.22E-07 |
| 8.8   | 100    | 77.4224  | 31514 | 79  | 2.77E-07 | 0 | 8.49E-07 |
| 110.2 | 88.828 | 36.6833  | 12669 | 33  | 0.010421 | 0 | 6.31E-06 |
| 16.2  | 100    | 37.134   | 12842 | 38  | 0.002989 | 0 | 2.26E-05 |
| 50    | 70.507 | 37.1818  | 12864 | 46  | 0.000485 | 0 | 8.85E-07 |
| 93.4  | 100    | 37.188   | 12867 | 27  | 0.037685 | 0 | 6.97E-05 |
| 148.7 | 100    | 14.723   | 4418  | 20  | 0.186823 | 0 | 6.36E-05 |
| 48.5  | 100    | 14.6991  | 4406  | 26  | 0.045516 | 0 | 3.46E-05 |
| 38.4  | 37.774 | 36.6793  | 12667 | 43  | 0.000936 | 0 | 1.75E-07 |
| 76.8  | 67.593 | 36.1785  | 12474 | 38  | 0.003322 | 0 | 3.39E-06 |
| 148.7 | 100    | 36.1807  | 12475 | 8   | 3.240092 | 0 | 0.001133 |
| 30.2  | 100    | 36.6303  | 12646 | 66  | 4.91E-06 | 0 | 6.91E-09 |
| 13    | 100    | 36.1188  | 12449 | 43  | 0.00096  | 0 | 3.88E-05 |
| 1.6   | 100    | 139.465  | 52200 | 31  | 0.021542 | 0 | 0.000261 |
| 3.6   | 100    | 139.9911 | 52372 | 36  | 0.008298 | 0 | 0.001224 |
| 23.7  | 100    | 125.5959 | 47666 | 51  | 0.000245 | 0 | 0.000169 |
| 74.9  | 51.163 | 126.0992 | 47891 | 59  | 3.68E-05 | 0 | 8.4E-05  |
| 24.5  | 66.072 | 125.4366 | 47600 | 33  | 0.015636 | 0 | 5.95E-05 |
| 42.3  | 58.975 | 125.3744 | 47575 | 46  | 0.000745 | 0 | 1.59E-07 |
| 56.1  | 71.044 | 82.4098  | 30980 | 62  | 2.01E-05 | 0 | 0.000583 |
| 5.9   | 100    | 101.9123 | 39044 | 59  | 3.56E-05 | 0 | 6.06E-06 |
| 3.5   | 100    | 101.4065 | 38850 | 31  | 0.023914 | 0 | 0.001112 |
| 43.6  | 77.281 | 99.8949  | 38293 | 68  | 4.85E-06 | 0 | 1.22E-08 |
| 9.3   | 100    | 100.2522 | 38427 | 31  | 0.023121 | 0 | 0.00018  |
| 40.3  | 63.697 | 100.4008 | 38483 | 71  | 2.52E-06 | 0 | 1.31E-08 |
| 11.5  | 100    | 100.9042 | 38662 | 83  | 1.64E-07 | 0 | 3.43E-09 |
| 11.4  | 15.843 | 69.6158  | 28195 | 45  | 0.001355 | 0 | 0.000106 |
| 43    | 4.26   | 78.974   | 28017 | 68  | 3.46E-06 | 0 | 1.32E-05 |
| 70.3  | 7.564  | 78.9934  | 28026 | 48  | 0.000352 | 0 | 6.14E-05 |
| 9.3   | 40.643 | 69.359   | 28080 | 41  | 0.003216 | 0 | 0.000661 |
| 7.5   | 22.442 | 69.5418  | 28162 | 55  | 0.000127 | 0 | 1.01E-06 |
| 9.2   | 34.725 | 69.7249  | 28242 | 58  | 6.52E-05 | 0 | 8.94E-07 |
| 139.7 | 100    | 42.9844  | 16731 | 55  | 0.000116 | 0 | 0.000504 |
| 64    | 11.956 | 43.4854  | 16944 | 62  | 2.37E-05 | 0 | 0.001083 |

|       |        |          |       |    |          |          |          |
|-------|--------|----------|-------|----|----------|----------|----------|
| 13.2  | 8.121  | 141.6392 | 54811 | 65 | 1.25E-05 | 0        | 8.94E-06 |
| 87.8  | 37.146 | 141.3626 | 54652 | 40 | 0.003477 | 0        | 9.23E-08 |
| 58.2  | 84.227 | 95.7809  | 34977 | 32 | 0.006524 | 0        | 0.000176 |
| 94.6  | 100    | 23.6279  | 8661  | 46 | 0.000845 | 0        | 1.66E-05 |
| 259.9 | 41.157 | 140.9452 | 54400 | 92 | 2.59E-08 | 0        | 7.02E-08 |
| 17.6  | 100    | 124.9348 | 47381 | 13 | 1.365675 | 0.000141 | 0.001739 |
| 49.5  | 11.091 | 78.0332  | 28923 | 62 | 1.99E-05 | 0.000141 | 0.001584 |
| 9.3   | 100    | 78.4858  | 27804 | 38 | 0.00351  | 0.000141 | 0.001743 |
| 38.3  | 70.239 | 71.8619  | 26546 | 58 | 6.26E-05 | 0.000141 | 0.001761 |
| 8.3   | 100    | 83.8214  | 31203 | 30 | 0.032171 | 0.000141 | 0.001586 |
| 17.8  | 100    | 77.5647  | 26798 | 59 | 3.13E-05 | 0.000273 | 0.001867 |
| 2.7   | 100    | 138.9613 | 52042 | 28 | 0.048301 | 0.000273 | 0.001849 |
| 11    | 100    | 14.7375  | 4425  | 28 | 0.034234 | 0.000273 | 0.002097 |
| 31.4  | 100    | 45.1774  | 14373 | 29 | 0.050641 | 0.000273 | 0.002046 |
| 3.4   | 100    | 141.3768 | 54660 | 29 | 0.043484 | 0.000525 | 0.002608 |
| 30.3  | 100    | 53.4308  | 17553 | 32 | 0.025455 | 0.000525 | 0.002415 |
| 1.7   | 100    | 138.4589 | 51887 | 23 | 0.16555  | 0.000758 | 0.00319  |
| 65.8  | 100    | 39.0683  | 12202 | 28 | 0.058313 | 0.000758 | 0.003046 |
| 5.1   | 100    | 118.987  | 44479 | 21 | 0.33224  | 0.000868 | 0.00335  |
| 23.5  | 44.154 | 69.1092  | 27977 | 26 | 0.091249 | 0.000868 | 0.003306 |
| 8.7   | 100    | 121.2552 | 45796 | 47 | 0.000595 | 0.000951 | 0.003995 |
| 0.6   | 100    | 137.9394 | 51717 | 30 | 0.029849 | 0.000951 | 0.00446  |
| 15.5  | 100    | 37.0388  | 11469 | 20 | 0.451324 | 0.000951 | 0.003939 |
| 16.4  | 100    | 79.4997  | 28243 | 37 | 0.003832 | 0.001022 | 0.004727 |
| 129.5 | 36.692 | 41.0921  | 14180 | 11 | 2.534221 | 0.001022 | 0.005565 |
| 19.4  | 100    | 73.2893  | 27154 | 57 | 8.07E-05 | 0.001022 | 0.004737 |
| 19.8  | 100    | 138.8072 | 53339 | 12 | 0.305494 | 0.001022 | 0.005481 |
| 25.3  | 100    | 32.648   | 11086 | 33 | 0.005051 | 0.001114 | 0.005953 |
| 66.2  | 77.515 | 41.1516  | 14202 | 11 | 2.591537 | 0.00121  | 0.006499 |
| 20.6  | 100    | 44.6761  | 14192 | 27 | 0.065598 | 0.001308 | 0.007107 |
| 18.4  | 100    | 43.1476  | 13630 | 27 | 0.074164 | 0.001498 | 0.007526 |
| 15.7  | 100    | 78.756   | 27261 | 34 | 0.011949 | 0.001498 | 0.007564 |
| 16.3  | 100    | 87.382   | 31532 | 30 | 0.015937 | 0.001498 | 0.007587 |
| 16.3  | 100    | 87.382   | 31532 | 30 | 0.015937 | 0.001498 | 0.007587 |
| 1.4   | 100    | 90.7256  | 33890 | 16 | 0.792832 | 0.001576 | 0.008799 |
| 8.4   | 100    | 51.1393  | 16700 | 34 | 0.016768 | 0.001576 | 0.008362 |
| 5     | 100    | 118.0083 | 44142 | 17 | 0.756629 | 0.001576 | 0.008716 |
| 24.6  | 100    | 46.2799  | 14800 | 28 | 0.061521 | 0.001576 | 0.008168 |
| 20.5  | 100    | 62.3254  | 21055 | 22 | 0.294673 | 0.001758 | 0.00963  |
| 61.6  | 100    | 53.3664  | 17446 | 57 | 3.68E-05 | 0.001758 | 0.00936  |
| 5.4   | 100    | 37.5864  | 11660 | 21 | 0.365717 | 0.001758 | 0.009575 |
| 1     | 100    | 102.4879 | 39272 | 33 | 0.009877 | 0.001758 | 0.009327 |
| 51.4  | 100    | 52.7573  | 17314 | 23 | 0.222491 | 0.001945 | 0.009997 |
| 37    | 100    | 38.2589  | 13302 | 7  | 3.990905 | 0.001945 | 0.01002  |
| 21    | 100    | 42.8785  | 13530 | 27 | 0.065289 | 0.001945 | 0.01017  |
| 26.9  | 100    | 51.0096  | 16649 | 17 | 0.807116 | 0.001945 | 0.0101   |
| 28.6  | 100    | 48.9627  | 15847 | 22 | 0.220549 | 0.002012 | 0.01104  |
| 36.8  | 100    | 57.0335  | 20393 | 10 | 2.085823 | 0.002376 | 0.01464  |
| 7.5   | 100    | 81.9034  | 30764 | 37 | 0.00825  | 0.002376 | 0.01505  |
| 15.1  | 100    | 75.4813  | 26502 | 25 | 0.038988 | 0.002543 | 0.01579  |
| 26.3  | 100    | 13.1734  | 3663  | 24 | 0.075547 | 0.002543 | 0.01634  |
| 55.3  | 100    | 25.1021  | 7448  | 28 | 0.028065 | 0.002719 | 0.01656  |

|       |        |          |       |    |          |          |         |
|-------|--------|----------|-------|----|----------|----------|---------|
| 5.5   | 100    | 63.1082  | 23274 | 43 | 0.002036 | 0.002719 | 0.01681 |
| 11    | 100    | 71.3764  | 26340 | 30 | 0.043394 | 0.002777 | 0.01781 |
| 65.4  | 100    | 23.7832  | 7698  | 27 | 0.036658 | 0.002777 | 0.01766 |
| 15.3  | 100    | 27.7255  | 8347  | 29 | 0.035796 | 0.002777 | 0.01787 |
| 76.3  | 100    | 51.9197  | 18366 | 53 | 0.00011  | 0.002777 | 0.01808 |
| 50.8  | 100    | 51.5826  | 16767 | 43 | 0.000947 | 0.002843 | 0.0188  |
| 9.4   | 100    | 14.3829  | 3978  | 27 | 0.018847 | 0.002843 | 0.01914 |
| 1.5   | 100    | 78.6742  | 32037 | 24 | 0.081116 | 0.003096 | 0.02024 |
| 36.2  | 100    | 53.8677  | 17632 | 44 | 0.000608 | 0.003178 | 0.02066 |
| 22.7  | 100    | 47.4998  | 15271 | 26 | 0.085534 | 0.003254 | 0.02128 |
| 104.4 | 100    | 53.6021  | 19526 | 13 | 1.914036 | 0.00337  | 0.02341 |
| 23.1  | 100    | 25.7016  | 8865  | 24 | 0.066707 | 0.00337  | 0.02274 |
| 1     | 100    | 102.9907 | 39455 | 29 | 0.026671 | 0.00337  | 0.02184 |
| 41    | 100    | 14.3512  | 4236  | 16 | 0.288675 | 0.003533 | 0.02471 |
| 17.3  | 100    | 77.0632  | 26606 | 43 | 0.001236 | 0.00362  | 0.02494 |
| 11.8  | 100    | 44.3062  | 17286 | 36 | 0.009086 | 0.003674 | 0.02516 |
| 39.9  | 100    | 49.4823  | 16060 | 18 | 0.536844 | 0.003674 | 0.02659 |
| 94.9  | 100    | 49.4001  | 17368 | 10 | 3.689084 | 0.003674 | 0.02507 |
| 67.8  | 100    | 24.2866  | 7885  | 21 | 0.130368 | 0.003736 | 0.02734 |
| 5.3   | 100    | 77.1404  | 26637 | 36 | 0.007538 | 0.004049 | 0.02912 |
| 1.3   | 100    | 78.7267  | 29192 | 28 | 0.028949 | 0.004344 | 0.03159 |
| 51.9  | 100    | 34.1277  | 10517 | 45 | 0.000644 | 0.004643 | 0.03336 |
| 233.1 | 42.792 | 51.6936  | 16808 | 50 | 0.000194 | 0.005031 | 0.03512 |
| 44.9  | 100    | 32.1449  | 10890 | 21 | 0.088767 | 0.005325 | 0.03675 |
| 203.2 | 4.121  | 49.9076  | 17570 | 15 | 1.332973 | 0.005325 | 0.03635 |
| 65    | 100    | 50.8688  | 17949 | 51 | 0.000158 | 0.005404 | 0.03766 |
| 15    | 100    | 39.5852  | 12377 | 19 | 0.445261 | 0.005404 | 0.03762 |
| 21.6  | 100    | 42.6452  | 13446 | 20 | 0.42461  | 0.005618 | 0.0383  |
| 37.1  | 100    | 24.8764  | 8559  | 32 | 0.009889 | 0.005618 | 0.03865 |
| 16.2  | 100    | 41.3706  | 12997 | 22 | 0.245385 | 0.005687 | 0.03945 |
| 187.9 | 9.49   | 50.4118  | 17765 | 14 | 1.43981  | 0.00573  | 0.04137 |
| 12.8  | 100    | 38.7509  | 12074 | 20 | 0.411732 | 0.00573  | 0.04102 |
| 55.7  | 100    | 51.884   | 16882 | 10 | 4.343819 | 0.006428 | 0.04718 |
| 2.3   | 100    | 89.9916  | 33596 | 16 | 0.823672 | 0.006428 | 0.04784 |
| 4.9   | 100    | 37.0662  | 11479 | 16 | 1.128213 | 0.006497 | 0.04851 |
| 2.3   | 100    | 78.5383  | 29124 | 28 | 0.051327 | 0.006721 | 0.0494  |
| 14.6  | 100    | 23.8627  | 7731  | 29 | 0.019596 | 0.006926 | 0.05085 |
| 13.3  | 100    | 36.8051  | 11385 | 22 | 0.240926 | 0.006926 | 0.05084 |
| 1.6   | 100    | 32.1474  | 10891 | 27 | 0.020722 | 0.006991 | 0.05155 |
| 15.5  | 100    | 44.8024  | 16097 | 36 | 0.00875  | 0.007057 | 0.05239 |
| 8.6   | 100    | 78.6002  | 29150 | 25 | 0.096005 | 0.007836 | 0.05674 |
| 12.8  | 100    | 40.4742  | 12674 | 19 | 0.464264 | 0.007836 | 0.05619 |
| 36.3  | 100    | 41.6748  | 13119 | 42 | 0.001135 | 0.0081   | 0.05926 |
| 61    | 100    | 51.2359  | 18083 | 4  | 17.51076 | 0.008361 | 0.06262 |
| 12.6  | 100    | 39.9682  | 12496 | 19 | 0.434417 | 0.0085   | 0.06334 |
| 1     | 100    | 84.8373  | 29652 | 12 | 2.181526 | 0.00861  | 0.06553 |
| 75.4  | 100    | 13.1987  | 3675  | 7  | 4.002685 | 0.008997 | 0.07002 |
| 108   | 100    | 25.1933  | 8675  | 22 | 0.117807 | 0.008997 | 0.06881 |
| 65    | 100    | 47.2879  | 15189 | 13 | 1.991853 | 0.008997 | 0.06965 |
| 15.6  | 100    | 70.7294  | 24107 | 18 | 0.615106 | 0.009141 | 0.07051 |
| 20.9  | 100    | 14.3692  | 4077  | 12 | 0.70519  | 0.00971  | 0.07745 |
| 15    | 100    | 38.5661  | 12025 | 19 | 0.442804 | 0.009818 | 0.07943 |



|       |        |          |       |     |          |          |          |
|-------|--------|----------|-------|-----|----------|----------|----------|
| 7.5   | 100    | 120.4851 | 45031 | 16  | 0.928878 | 0.009858 | 0.08181  |
| 19.7  | 100    | 68.2406  | 25161 | 64  | 1.43E-05 | 0        | 2.28E-06 |
| 31    | 21.328 | 67.7658  | 24978 | 88  | 5.92E-08 | 0        | 1.51E-08 |
| 71.8  | 3.457  | 67.7355  | 24965 | 60  | 3.29E-05 | 0        | 5.47E-06 |
| 0     | 100    | 67.3118  | 24789 | 90  | 2.83E-08 | 0        | 5.51E-09 |
| 1.2   | 68.869 | 66.8056  | 24601 | 100 | 2.96E-09 | 0        | 3.79E-11 |
| 0     | 100    | 67.8125  | 24998 | 51  | 0.000256 | 0        | 6.2E-05  |
| 36.5  | 100    | 69.7359  | 25772 | 61  | 2.68E-05 | 0        | 2.93E-08 |
| 31.4  | 34.028 | 69.4225  | 25649 | 36  | 0.008706 | 0        | 8.45E-05 |
| 87    | 52.653 | 69.2309  | 25575 | 63  | 1.83E-05 | 0        | 3.25E-10 |
| 2.6   | 100    | 66.6246  | 24531 | 68  | 4.51E-06 | 0        | 1.75E-08 |
| 79.2  | 4.106  | 62.0958  | 22787 | 46  | 0.000658 | 0        | 0.000605 |
| 51.4  | 43.171 | 62.1511  | 22808 | 53  | 0.000148 | 0        | 0.000571 |
| 0     | 70.411 | 66.303   | 24411 | 75  | 1.05E-06 | 0        | 4.81E-10 |
| 15.7  | 100    | 81.8298  | 30409 | 57  | 4.04E-05 | 0        | 3.13E-05 |
| 23.3  | 100    | 81.8184  | 30405 | 79  | 2.71E-07 | 0        | 1.79E-07 |
| 2.7   | 100    | 81.6523  | 30340 | 43  | 0.000773 | 0        | 2.42E-05 |
| 15.9  | 86.149 | 81.1487  | 30145 | 88  | 2.87E-08 | 0        | 1.16E-10 |
| 30.3  | 76.658 | 80.9159  | 30048 | 110 | 1.63E-10 | 0        | 7.42E-12 |
| 20.4  | 12.537 | 80.6418  | 29940 | 95  | 4.78E-09 | 0        | 3.54E-10 |
| 0.3   | 63.212 | 76.8901  | 28511 | 90  | 1.3E-08  | 0        | 6.67E-07 |
| 53.7  | 6.713  | 88.2218  | 36079 | 58  | 6.45E-05 | 0        | 6.77E-05 |
| 29.9  | 69.406 | 84.315   | 34353 | 51  | 0.000304 | 0        | 0.000289 |
| 19.2  | 51.248 | 78.5485  | 31990 | 71  | 1.06E-06 | 0        | 4.5E-08  |
| 5.5   | 100    | 78.3948  | 31928 | 63  | 1.42E-05 | 0        | 3.86E-06 |
| 20.5  | 33.248 | 78.3315  | 31901 | 81  | 2.32E-07 | 0        | 1.18E-08 |
| 104.8 | 100    | 61.605   | 20770 | 59  | 4.61E-05 | 0        | 1.57E-06 |
| 0     | 100    | 49.4997  | 17943 | 56  | 6.69E-05 | 0        | 6.01E-06 |
| 4.6   | 100    | 112.5707 | 40849 | 30  | 0.027377 | 0        | 0.001232 |
| 101.3 | 100    | 51.5349  | 16751 | 49  | 0.000478 | 0        | 0.000748 |
| 59.4  | 31.485 | 91.2757  | 32275 | 23  | 0.226164 | 0        | 3.14E-05 |
| 21.4  | 46.546 | 92.2826  | 32681 | 53  | 0.00021  | 0        | 1.44E-06 |
| 10.7  | 100    | 92.0746  | 32603 | 45  | 0.00139  | 0        | 4.68E-06 |
| 43    | 11.973 | 91.7787  | 32489 | 59  | 5.64E-05 | 0        | 6.57E-09 |
| 34.1  | 96.657 | 91.5634  | 32397 | 66  | 1.09E-05 | 0        | 1.44E-10 |
| 2.5   | 100    | 113.2456 | 41120 | 35  | 0.008386 | 0        | 0.000269 |
| 19.9  | 45.835 | 107.6869 | 38837 | 90  | 3.73E-08 | 0        | 2.2E-07  |
| 5.3   | 23.587 | 107.6706 | 38830 | 72  | 2.7E-06  | 0        | 6.69E-07 |
| 17.5  | 23.413 | 113.0784 | 41048 | 73  | 1.1E-06  | 0        | 5.27E-09 |
| 1.5   | 100    | 113.1265 | 41068 | 62  | 8.12E-06 | 0        | 4.6E-06  |
| 7.8   | 100    | 114.0944 | 41497 | 63  | 1.18E-05 | 0        | 2.15E-06 |
| 2     | 100    | 107.1687 | 38614 | 49  | 0.000539 | 0        | 0.000183 |
| 20.2  | 45.339 | 113.5841 | 41268 | 71  | 1.72E-06 | 0        | 5.76E-09 |
| 21.8  | 85.571 | 86.7166  | 30407 | 67  | 8.02E-06 | 0        | 2.09E-07 |
| 15.5  | 100    | 86.3788  | 30257 | 44  | 0.001879 | 0        | 0.000307 |
| 12.4  | 57.634 | 86.3248  | 30234 | 61  | 3.82E-05 | 0        | 1.86E-07 |
| 25.3  | 6.096  | 86.212   | 30183 | 77  | 8.69E-07 | 0        | 2.23E-08 |
| 1.7   | 100    | 85.8171  | 30022 | 64  | 1.9E-05  | 0        | 4.01E-05 |
| 6.3   | 100    | 87.2208  | 30619 | 54  | 0.000177 | 0        | 6.69E-05 |
| 4.8   | 100    | 85.3317  | 29838 | 54  | 0.000158 | 0        | 4.5E-06  |
| 2     | 100    | 84.8307  | 29649 | 53  | 0.000242 | 0        | 0.000109 |
| 2     | 100    | 84.8307  | 29649 | 53  | 0.000242 | 0        | 0.000109 |

|       |        |          |       |     |          |          |          |
|-------|--------|----------|-------|-----|----------|----------|----------|
| 4.8   | 100    | 85.3317  | 29838 | 54  | 0.000158 | 0        | 4.5E-06  |
| 14.5  | 24.085 | 79.5063  | 29498 | 63  | 1.23E-05 | 0        | 4.86E-05 |
| 16.2  | 16.729 | 79.5054  | 29497 | 56  | 5.07E-05 | 0        | 7.61E-05 |
| 22.7  | 100    | 83.4299  | 31047 | 43  | 0.002119 | 0        | 7.14E-06 |
| 253.6 | 16.714 | 83.4677  | 31063 | 48  | 0.000568 | 0        | 4.45E-10 |
| 14.3  | 34.689 | 81.6553  | 30334 | 52  | 0.000218 | 0        | 3.36E-06 |
| 80.2  | 16.75  | 83.9723  | 31270 | 52  | 0.000251 | 0        | 6.74E-09 |
| 15.8  | 77.152 | 83.9393  | 31256 | 42  | 0.002722 | 0        | 5.69E-06 |
| 28.4  | 100    | 53.7267  | 19075 | 41  | 0.003543 | 0        | 4.98E-06 |
| 7.7   | 100    | 110.8946 | 41322 | 50  | 0.000128 | 0        | 1.07E-07 |
| 21.2  | 29.39  | 111.101  | 41414 | 62  | 7.65E-06 | 0        | 1.8E-10  |
| 21.3  | 59.797 | 111.1096 | 41418 | 78  | 2.14E-07 | 0        | 7.79E-12 |
| 5.9   | 100    | 90.725   | 34606 | 39  | 0.001413 | 0        | 0.000774 |
| 6.7   | 100    | 91.2378  | 34829 | 45  | 0.000365 | 0        | 0.001133 |
| 14.5  | 33.625 | 91.2274  | 34824 | 75  | 3.77E-07 | 0        | 4.14E-07 |
| 1.4   | 100    | 90.9269  | 34698 | 78  | 7.61E-08 | 0        | 0.000184 |
| 8     | 100    | 101.227  | 37326 | 44  | 0.000231 | 0        | 9.2E-06  |
| 9.7   | 100    | 115.167  | 44870 | 94  | 1.06E-08 | 0        | 3.66E-09 |
| 0     | 100    | 115.1227 | 44852 | 104 | 6.65E-10 | 0        | 2.56E-09 |
| 0.4   | 100    | 117.5568 | 45849 | 73  | 1.44E-06 | 0        | 8.29E-05 |
| 6.4   | 100    | 106.204  | 39400 | 76  | 5.72E-07 | 0        | 3.98E-09 |
| 0     | 100    | 115.103  | 44844 | 55  | 5.56E-05 | 0        | 7.55E-05 |
| 15.3  | 57.27  | 114.8271 | 44740 | 77  | 5.95E-07 | 0        | 6.99E-09 |
| 25.6  | 13.041 | 114.6574 | 44663 | 81  | 1.96E-07 | 0        | 5.19E-09 |
| 0     | 100    | 114.6211 | 44646 | 62  | 1.01E-05 | 0        | 1.41E-05 |
| 32.5  | 64.739 | 123.1213 | 46618 | 56  | 1.95E-05 | 0        | 2.91E-06 |
| 15.6  | 31.57  | 123.1253 | 46620 | 60  | 8.22E-06 | 0        | 5.36E-06 |
| 4.9   | 100    | 123.6324 | 46839 | 37  | 0.001501 | 0        | 0.000452 |
| 22.1  | 86.525 | 73.2118  | 27119 | 69  | 1.04E-06 | 0        | 1.33E-07 |
| 13.1  | 100    | 73.1801  | 27104 | 57  | 3.92E-05 | 0        | 1.09E-08 |
| 32    | 100    | 72.8702  | 26968 | 44  | 0.000778 | 0        | 5.06E-07 |
| 3.8   | 100    | 136.1267 | 52163 | 28  | 0.072393 | 0        | 0.001152 |
| 9.2   | 100    | 72.6996  | 26894 | 38  | 0.001285 | 0        | 0.000401 |
| 2.4   | 100    | 135.5201 | 51905 | 35  | 0.013598 | 0        | 0.000759 |
| 210.2 | 51.628 | 141.0745 | 54476 | 107 | 7.62E-10 | 0        | 8.4E-13  |
| 15.1  | 100    | 62.1041  | 24977 | 60  | 3.92E-05 | 0        | 0.000562 |
| 16.6  | 100    | 83.8039  | 30021 | 41  | 0.003189 | 0        | 7.91E-05 |
| 22.8  | 71.951 | 98.4499  | 36103 | 59  | 4.88E-05 | 0        | 8.72E-09 |
| 41.1  | 13.194 | 98.5575  | 36154 | 47  | 0.000787 | 0        | 1.81E-08 |
| 3.3   | 100    | 91.0178  | 33017 | 65  | 1.48E-05 | 0        | 4.14E-05 |
| 15.2  | 100    | 92.7858  | 32881 | 35  | 0.011789 | 0.000273 | 0.00186  |
| 19.2  | 100    | 67.228   | 24756 | 35  | 0.011139 | 0.000273 | 0.001827 |
| 12.6  | 100    | 67.1307  | 24719 | 21  | 0.23241  | 0.000273 | 0.001843 |
| 8.7   | 100    | 39.1959  | 12224 | 64  | 1.78E-05 | 0.000525 | 0.002396 |
| 1.2   | 100    | 79.3526  | 32328 | 34  | 0.012583 | 0.000758 | 0.002853 |
| 182.3 | 2.791  | 52.0392  | 16943 | 54  | 0.00016  | 0.000758 | 0.002989 |
| 7.1   | 100    | 82.161   | 30534 | 26  | 0.08546  | 0.000758 | 0.003122 |
| 1     | 100    | 84.1648  | 29402 | 34  | 0.015434 | 0.000758 | 0.003236 |
| 7.6   | 100    | 110.5969 | 41199 | 18  | 0.181852 | 0.000868 | 0.003364 |
| 1.3   | 100    | 111.618  | 40463 | 25  | 0.07494  | 0.000868 | 0.003349 |
| 60.4  | 82.889 | 68.3595  | 25068 | 70  | 3.46E-06 | 0.000951 | 0.004017 |
| 6.6   | 100    | 61.6436  | 22598 | 40  | 0.003005 | 0.000951 | 0.004338 |

|       |        |          |       |    |          |          |          |
|-------|--------|----------|-------|----|----------|----------|----------|
| 11.7  | 100    | 74.1176  | 27765 | 28 | 0.013515 | 0.000951 | 0.004177 |
| 4.7   | 100    | 73.6138  | 27561 | 29 | 0.010092 | 0.000951 | 0.003938 |
| 11    | 100    | 87.7176  | 35850 | 33 | 0.021613 | 0.001022 | 0.00489  |
| 19.6  | 100    | 35.6671  | 13679 | 51 | 0.000326 | 0.001022 | 0.005748 |
| 4.4   | 100    | 104.699  | 37563 | 27 | 0.012761 | 0.001022 | 0.005407 |
| 40.7  | 100    | 39.3062  | 13516 | 62 | 2.69E-05 | 0.001114 | 0.006156 |
| 6.3   | 100    | 57.0875  | 18864 | 37 | 0.003625 | 0.00121  | 0.006549 |
| 2.8   | 100    | 80.1352  | 29738 | 30 | 0.013649 | 0.00141  | 0.007244 |
| 1.9   | 100    | 124.1391 | 47052 | 22 | 0.047587 | 0.001498 | 0.007879 |
| 8.4   | 100    | 66.497   | 24481 | 18 | 0.550648 | 0.001758 | 0.009401 |
| 20.5  | 100    | 44.46    | 14121 | 44 | 0.001598 | 0.001854 | 0.00971  |
| 19.1  | 100    | 49.2164  | 15874 | 48 | 0.000683 | 0.002012 | 0.01063  |
| 116.9 | 24.276 | 32.1282  | 11038 | 36 | 0.002109 | 0.002012 | 0.01081  |
| 10.2  | 100    | 55.8235  | 22266 | 29 | 0.040977 | 0.002079 | 0.01162  |
| 0     | 100    | 113.7058 | 44296 | 21 | 0.225628 | 0.002543 | 0.01603  |
| 47.4  | 100    | 38.8008  | 13331 | 57 | 9.18E-05 | 0.002777 | 0.01691  |
| 21    | 100    | 54.2277  | 17768 | 33 | 0.019562 | 0.003254 | 0.02122  |
| 5.6   | 100    | 90.2971  | 31877 | 23 | 0.208622 | 0.00337  | 0.02316  |
| 5.6   | 100    | 90.2971  | 31877 | 23 | 0.208622 | 0.00337  | 0.02316  |
| 8.4   | 100    | 49.6526  | 18004 | 12 | 1.53041  | 0.003533 | 0.02461  |
| 44.3  | 100    | 53.1722  | 17373 | 47 | 0.000737 | 0.003533 | 0.0249   |
| 16.8  | 100    | 87.7933  | 30855 | 19 | 0.509623 | 0.004124 | 0.02939  |
| 2.5   | 100    | 77.8282  | 31682 | 17 | 0.538424 | 0.004192 | 0.03011  |
| 261.3 | 25.28  | 51.9151  | 16895 | 24 | 0.16269  | 0.004504 | 0.03199  |
| 6.6   | 100    | 68.9203  | 25453 | 18 | 0.512258 | 0.00496  | 0.03443  |
| 0     | 100    | 135.5046 | 51898 | 15 | 1.306021 | 0.005556 | 0.03825  |
| 7.7   | 100    | 65.5059  | 23811 | 23 | 0.193744 | 0.00573  | 0.04087  |
| 11.9  | 100    | 89.3644  | 33343 | 22 | 0.249605 | 0.006145 | 0.04581  |
| 2.6   | 100    | 94.5219  | 36215 | 14 | 0.428357 | 0.006654 | 0.0486   |
| 2.6   | 100    | 91.4885  | 32366 | 14 | 1.551551 | 0.006795 | 0.04978  |
| 6.9   | 100    | 85.7018  | 29976 | 18 | 0.656112 | 0.00728  | 0.05289  |
| 20.6  | 100    | 33.3135  | 11519 | 35 | 0.002729 | 0.00861  | 0.06528  |
| 0.8   | 100    | 70.8225  | 28727 | 17 | 0.246493 | 0.009914 | 0.08218  |
| 2.1   | 100    | 90.1132  | 33647 | 79 | 1.13E-07 | 0        | 9.41E-09 |
| 3.4   | 100    | 89.9534  | 33579 | 36 | 0.002608 | 0        | 0.001012 |
| 57.9  | 100    | 46.4667  | 16195 | 32 | 0.020373 | 0        | 2.65E-05 |
| 66.4  | 100    | 45.0422  | 15636 | 38 | 0.004526 | 0        | 0.000176 |
| 46.5  | 100    | 14.0616  | 3863  | 33 | 0.012449 | 0        | 0.000113 |
| 8.7   | 100    | 81.2168  | 33077 | 68 | 4.96E-07 | 0        | 7.29E-07 |
| 2.1   | 100    | 98.22    | 40320 | 48 | 0.000483 | 0        | 0.000181 |
| 11.4  | 100    | 91.9778  | 32564 | 85 | 1.02E-07 | 0        | 3.94E-10 |
| 68.7  | 100    | 108.9912 | 39399 | 65 | 4.8E-06  | 0        | 6.44E-05 |
| 40.5  | 100    | 108.4894 | 39182 | 64 | 6.77E-06 | 0        | 3.85E-05 |
| 35.9  | 100    | 79.0137  | 29305 | 65 | 1.28E-05 | 0        | 3.38E-05 |
| 190.3 | 100    | 46.969   | 16398 | 39 | 0.003739 | 0        | 1.89E-05 |
| 12.8  | 100    | 91.371   | 34355 | 76 | 9.4E-07  | 0        | 6.77E-09 |
| 13.9  | 67.195 | 96.151   | 36324 | 56 | 8.95E-05 | 0        | 1.7E-07  |
| 28.1  | 54.242 | 57.5941  | 21067 | 66 | 8.27E-06 | 0        | 1.11E-05 |
| 123.5 | 100    | 57.6543  | 21094 | 39 | 0.003786 | 0        | 0.000915 |
| 127.5 | 100    | 14.9433  | 4528  | 17 | 0.745757 | 0        | 0.00095  |
| 22.7  | 100    | 38.4654  | 13390 | 42 | 0.002379 | 0        | 0.001465 |
| 49.4  | 100    | 38.5483  | 13422 | 49 | 0.000461 | 0        | 0.000668 |

|       |        |          |       |     |          |          |          |
|-------|--------|----------|-------|-----|----------|----------|----------|
| 2.6   | 100    | 115.9476 | 45193 | 48  | 0.000468 | 0        | 0.000216 |
| 46.9  | 86.768 | 107.1293 | 39776 | 48  | 0.000614 | 0        | 7.09E-06 |
| 12.6  | 100    | 124.9429 | 47384 | 55  | 0.000135 | 0        | 1.95E-06 |
| 6.4   | 100    | 125.2315 | 47516 | 46  | 0.001168 | 0        | 1.16E-05 |
| 2.5   | 100    | 122      | 46137 | 75  | 9.51E-07 | 0        | 4.52E-07 |
| 7     | 100    | 128.5935 | 48939 | 21  | 0.198123 | 0        | 4.82E-05 |
| 10.1  | 100    | 69.2092  | 25327 | 47  | 0.000214 | 0        | 0.00026  |
| 15.8  | 100    | 69.1777  | 25314 | 63  | 4.98E-06 | 0        | 9.39E-06 |
| 15.6  | 100    | 68.7076  | 25136 | 73  | 5.42E-07 | 0        | 3.18E-06 |
| 44.9  | 51.713 | 68.6725  | 25123 | 78  | 1.56E-07 | 0        | 4.1E-08  |
| 15.2  | 100    | 99.7863  | 36705 | 16  | 0.888849 | 0.000141 | 0.001704 |
| 5.4   | 100    | 68.2053  | 24948 | 36  | 0.002788 | 0.000273 | 0.001971 |
| 19    | 100    | 28.8415  | 9588  | 26  | 0.066511 | 0.000273 | 0.001999 |
| 18.8  | 100    | 14.0816  | 3871  | 40  | 0.002955 | 0.000951 | 0.003992 |
| 22.2  | 100    | 97.2147  | 34619 | 16  | 0.854453 | 0.001022 | 0.005357 |
| 10    | 100    | 108.9976 | 39402 | 36  | 0.003612 | 0.001114 | 0.006061 |
| 27.3  | 100    | 44.6326  | 16538 | 33  | 0.000716 | 0.001114 | 0.006003 |
| 27.8  | 100    | 66.3852  | 24252 | 44  | 0.001844 | 0.001114 | 0.006047 |
| 2.7   | 100    | 128.554  | 48922 | 14  | 0.906882 | 0.00121  | 0.006568 |
| 31.7  | 100    | 46.612   | 16256 | 28  | 0.0607   | 0.001498 | 0.007671 |
| 0     | 100    | 118.1352 | 43197 | 35  | 0.01446  | 0.001576 | 0.008162 |
| 2.7   | 100    | 65.842   | 24227 | 45  | 0.00098  | 0.001758 | 0.009022 |
| 10.3  | 100    | 59.2822  | 21504 | 29  | 0.034824 | 0.002079 | 0.01146  |
| 38.9  | 100    | 53.3252  | 18932 | 30  | 0.042789 | 0.002079 | 0.01208  |
| 12    | 100    | 77.7367  | 27469 | 20  | 0.265809 | 0.002315 | 0.01373  |
| 352.4 | 87.589 | 12.9877  | 3568  | 56  | 6.1E-05  | 0.002777 | 0.01743  |
| 5.7   | 100    | 45.5102  | 15819 | 36  | 0.008376 | 0.003096 | 0.02026  |
| 6.7   | 100    | 48.8303  | 17538 | 41  | 0.000578 | 0.003096 | 0.01976  |
| 7     | 100    | 47.5037  | 15255 | 32  | 0.030015 | 0.003533 | 0.02461  |
| 14.6  | 100    | 49.05    | 17626 | 27  | 0.012289 | 0.00573  | 0.04112  |
| 281.4 | 57.93  | 47.5363  | 15268 | 14  | 1.566603 | 0.006145 | 0.04573  |
| 25.3  | 100    | 66.8892  | 24470 | 39  | 0.004819 | 0.006497 | 0.04814  |
| 98.7  | 100    | 48.0392  | 15448 | 9   | 5.52698  | 0.007057 | 0.05235  |
| 15.4  | 100    | 61.1114  | 22452 | 25  | 0.100885 | 0.00728  | 0.05287  |
| 14.6  | 100    | 69.4804  | 25429 | 21  | 0.092103 | 0.009514 | 0.07273  |
| 41.4  | 100    | 60.8888  | 22315 | 42  | 0.00277  | 0        | 1.88E-05 |
| 5.2   | 100    | 41.1055  | 12903 | 50  | 0.000329 | 0        | 0.000242 |
| 17.8  | 100    | 32.29    | 10868 | 45  | 0.000905 | 0        | 2.08E-05 |
| 17    | 100    | 140.5479 | 52003 | 76  | 1.07E-06 | 0        | 5.4E-08  |
| 30.9  | 100    | 140.5325 | 51996 | 88  | 6.9E-08  | 0        | 1.17E-09 |
| 60.3  | 74.887 | 140.6275 | 52040 | 66  | 8.76E-06 | 0        | 3.07E-06 |
| 17.8  | 100    | 140.6297 | 52041 | 139 | 4.39E-13 | 0        | 7.22E-09 |
| 33.1  | 100    | 13.4109  | 3640  | 45  | 0.000667 | 0        | 0.000129 |
| 18.9  | 100    | 13.0134  | 3510  | 44  | 0.001688 | 0        | 1.16E-05 |
| 1.2   | 100    | 137.8838 | 51048 | 48  | 0.000718 | 0        | 0.000136 |
| 10.5  | 100    | 76.8776  | 27088 | 40  | 0.002507 | 0        | 0.000132 |
| 49.4  | 6.423  | 77.3837  | 27313 | 38  | 0.003938 | 0        | 8.78E-05 |
| 18.1  | 100    | 75.1037  | 26337 | 44  | 0.001909 | 0        | 0.00032  |
| 42.3  | 100    | 34.1638  | 12133 | 55  | 7.22E-05 | 0        | 9.56E-07 |
| 84.1  | 100    | 33.6614  | 11937 | 20  | 0.189588 | 0        | 0.000708 |
| 28.4  | 100    | 13.4455  | 3701  | 65  | 6.39E-06 | 0        | 6.76E-06 |
| 19.3  | 100    | 31.2138  | 10991 | 48  | 0.000341 | 0        | 0.000634 |

|       |        |          |       |     |          |          |          |
|-------|--------|----------|-------|-----|----------|----------|----------|
| 16.6  | 86.468 | 66.3985  | 22419 | 59  | 4.37E-05 | 0        | 0.000028 |
| 10.3  | 100    | 65.8942  | 22219 | 41  | 0.002582 | 0        | 0.000454 |
| 19    | 100    | 13.0074  | 3502  | 50  | 0.000404 | 0        | 1.18E-05 |
| 39    | 83.29  | 101.0207 | 36100 | 54  | 6.75E-05 | 0        | 6.35E-05 |
| 37    | 10.626 | 81.8158  | 28454 | 65  | 1.54E-05 | 0        | 2.14E-06 |
| 16.8  | 100    | 81.5791  | 28373 | 50  | 0.000465 | 0        | 7.66E-05 |
| 13.7  | 100    | 81.4919  | 28337 | 80  | 4.07E-07 | 0        | 1.64E-07 |
| 37.4  | 7.478  | 81.314   | 28271 | 58  | 7.75E-05 | 0        | 1.68E-05 |
| 21.6  | 100    | 82.0028  | 28525 | 47  | 0.000576 | 0        | 0.000657 |
| 14    | 100    | 84.146   | 29394 | 35  | 0.013589 | 0        | 0.000244 |
| 11.7  | 100    | 83.6892  | 29214 | 55  | 0.000143 | 0        | 3.43E-05 |
| 61.8  | 12.293 | 83.6382  | 29194 | 39  | 0.004733 | 0        | 3.69E-05 |
| 5.6   | 100    | 83.182   | 29011 | 47  | 0.000821 | 0        | 0.000346 |
| 48.3  | 85.203 | 83.1365  | 28993 | 36  | 0.010316 | 0        | 0.000216 |
| 12.7  | 100    | 13.485   | 3655  | 65  | 5.9E-06  | 0        | 0.000291 |
| 10.4  | 100    | 87.1565  | 32584 | 39  | 0.002704 | 0        | 2.51E-05 |
| 65.6  | 100    | 54.1769  | 19255 | 57  | 3.14E-05 | 0        | 0.001513 |
| 6     | 100    | 122.7361 | 47658 | 80  | 4.12E-07 | 0        | 6.97E-09 |
| 240.6 | 11.391 | 140.5457 | 55237 | 98  | 7.28E-09 | 0        | 1.81E-10 |
| 72    | 2.467  | 140.545  | 55236 | 77  | 8.35E-07 | 0        | 5.76E-09 |
| 21    | 16.125 | 111.6537 | 42928 | 74  | 1.2E-06  | 0        | 7.64E-08 |
| 20.6  | 3.843  | 111.6397 | 42922 | 52  | 0.000216 | 0        | 1.63E-06 |
| 1.3   | 100    | 108.4968 | 41633 | 40  | 0.001971 | 0        | 0.000208 |
| 16.6  | 18.116 | 108.0491 | 41457 | 62  | 1.11E-05 | 0        | 6.38E-07 |
| 10.3  | 34.744 | 107.9952 | 41437 | 63  | 9.09E-06 | 0        | 6.77E-08 |
| 2.9   | 100    | 107.5422 | 41233 | 31  | 0.015267 | 0        | 0.001077 |
| 8.2   | 100    | 98.6682  | 38000 | 58  | 4.88E-05 | 0        | 4.37E-05 |
| 21.7  | 13.469 | 98.6217  | 37981 | 57  | 6.85E-05 | 0        | 2.08E-05 |
| 65.3  | 100    | 98.1202  | 37757 | 57  | 5.66E-05 | 0        | 4.38E-08 |
| 16    | 100    | 61.5485  | 22628 | 54  | 8.59E-06 | 0        | 1.08E-05 |
| 10.8  | 100    | 138.9853 | 53423 | 41  | 0.000235 | 0        | 1.15E-05 |
| 10.7  | 100    | 65.5114  | 24266 | 67  | 5.39E-07 | 0        | 4.4E-06  |
| 77.2  | 100    | 13.5458  | 3845  | 65  | 5.55E-06 | 0        | 1.02E-06 |
| 108.2 | 97.582 | 140.4066 | 54094 | 26  | 0.012596 | 0        | 1.24E-06 |
| 14.7  | 100    | 20.7891  | 6335  | 43  | 0.000884 | 0        | 0.001018 |
| 20.8  | 100    | 125.9986 | 47846 | 78  | 6.77E-07 | 0        | 8.82E-06 |
| 25.6  | 79.339 | 126.5007 | 48055 | 71  | 3.18E-06 | 0        | 1.04E-05 |
| 21.9  | 100    | 77.876   | 29343 | 38  | 0.000544 | 0        | 4.87E-06 |
| 26    | 100    | 58.564   | 23434 | 34  | 0.011594 | 0        | 0.000608 |
| 32.2  | 100    | 16.5962  | 5087  | 39  | 0.004722 | 0        | 0.000129 |
| 21.1  | 100    | 77.8965  | 27544 | 31  | 0.021388 | 0        | 0.000112 |
| 0.7   | 100    | 140.7401 | 50338 | 101 | 3.6E-09  | 0        | 2.11E-09 |
| 41.1  | 60.262 | 41.4958  | 15168 | 65  | 6.23E-06 | 0        | 4.61E-06 |
| 47.7  | 100    | 16.9431  | 5046  | 23  | 0.188008 | 0        | 0.000194 |
| 13.3  | 100    | 56.8477  | 20578 | 25  | 0.105698 | 0.000141 | 0.001776 |
| 19.3  | 100    | 31.2138  | 10991 | 47  | 0.000503 | 0.000141 | 0.001655 |
| 25.3  | 100    | 13.5411  | 3655  | 41  | 0.001662 | 0.000141 | 0.001631 |
| 107.7 | 21.115 | 66.592   | 26873 | 48  | 0.000479 | 0.000273 | 0.00185  |
| 12.9  | 100    | 61.0459  | 22426 | 32  | 0.001751 | 0.000273 | 0.002105 |
| 12.9  | 100    | 61.0459  | 22426 | 32  | 0.001751 | 0.000273 | 0.002105 |
| 12.7  | 100    | 76.9519  | 27120 | 45  | 0.000964 | 0.000407 | 0.002132 |
| 29.7  | 100    | 20.1982  | 6439  | 43  | 0.000857 | 0.000525 | 0.002473 |

|       |        |          |       |    |          |          |          |
|-------|--------|----------|-------|----|----------|----------|----------|
| 8.2   | 100    | 107.4925 | 41208 | 26 | 0.051697 | 0.000758 | 0.003213 |
| 131.6 | 100    | 13.5523  | 3848  | 27 | 0.034808 | 0.000951 | 0.003897 |
| 10.5  | 100    | 81.4996  | 28340 | 33 | 0.015201 | 0.000951 | 0.004384 |
| 30    | 100    | 82.5417  | 28740 | 26 | 0.105239 | 0.000951 | 0.003753 |
| 7.9   | 100    | 81.076   | 28184 | 30 | 0.047252 | 0.000951 | 0.004511 |
| 12.2  | 100    | 13.392   | 3634  | 47 | 0.000417 | 0.000951 | 0.004506 |
| 3.3   | 100    | 83.6995  | 29219 | 23 | 0.214264 | 0.000951 | 0.004072 |
| 58.1  | 100    | 67.24    | 27153 | 42 | 0.002111 | 0.001022 | 0.005619 |
| 2.6   | 100    | 83.1941  | 29016 | 23 | 0.195731 | 0.001022 | 0.005106 |
| 17.8  | 100    | 35.0336  | 12456 | 34 | 0.008806 | 0.001114 | 0.006335 |
| 0.5   | 100    | 106.0123 | 40593 | 42 | 0.002943 | 0.001114 | 0.005902 |
| 131   | 79.481 | 32.2782  | 10863 | 26 | 0.072629 | 0.00121  | 0.006866 |
| 17.3  | 100    | 67.4705  | 22839 | 40 | 0.004185 | 0.001308 | 0.006901 |
| 64.2  | 63.581 | 51.2987  | 20326 | 57 | 6.55E-05 | 0.00141  | 0.007291 |
| 32.6  | 100    | 69.1794  | 25410 | 38 | 0.005161 | 0.001576 | 0.008826 |
| 33.2  | 100    | 66.9662  | 22642 | 24 | 0.153905 | 0.001576 | 0.008521 |
| 146.3 | 25.266 | 54.6813  | 19464 | 54 | 8.42E-05 | 0.001758 | 0.009277 |
| 2.4   | 100    | 135.8048 | 53107 | 28 | 0.074891 | 0.001758 | 0.009016 |
| 4.7   | 100    | 71.7874  | 24505 | 28 | 0.07582  | 0.001854 | 0.009828 |
| 0.7   | 100    | 112.1439 | 43125 | 26 | 0.077628 | 0.001945 | 0.009996 |
| 19.1  | 100    | 24.4384  | 7313  | 16 | 0.961521 | 0.002012 | 0.01026  |
| 65.3  | 7.46   | 69.6842  | 25627 | 49 | 0.000393 | 0.002012 | 0.01064  |
| 8     | 100    | 13.0548  | 3551  | 33 | 0.022352 | 0.002012 | 0.01036  |
| 4.3   | 100    | 45.5764  | 14525 | 19 | 0.115632 | 0.002012 | 0.01031  |
| 11.7  | 100    | 82.3186  | 28648 | 29 | 0.057816 | 0.002079 | 0.01211  |
| 3.7   | 100    | 61.4808  | 22343 | 24 | 0.011152 | 0.002079 | 0.01188  |
| 3.7   | 100    | 61.4808  | 22343 | 24 | 0.011152 | 0.002079 | 0.01188  |
| 3.7   | 100    | 86.6522  | 32370 | 18 | 0.458109 | 0.002315 | 0.0141   |
| 0     | 100    | 124.4845 | 51117 | 20 | 0.449008 | 0.002315 | 0.01317  |
| 31.8  | 100    | 125.8273 | 47768 | 39 | 0.006058 | 0.002315 | 0.0135   |
| 45    | 100    | 14.174   | 3887  | 19 | 0.402583 | 0.002315 | 0.01338  |
| 4.6   | 100    | 96.5303  | 37056 | 20 | 0.297765 | 0.002376 | 0.01524  |
| 34.2  | 100    | 45.1514  | 14367 | 25 | 0.136653 | 0.002636 | 0.01637  |
| 15.4  | 100    | 69.7527  | 25655 | 29 | 0.034473 | 0.002777 | 0.01766  |
| 11.9  | 100    | 13.5183  | 3648  | 32 | 0.012929 | 0.002843 | 0.01843  |
| 57.4  | 100    | 20.8326  | 6352  | 27 | 0.0458   | 0.00337  | 0.02199  |
| 6.7   | 100    | 76.3413  | 28713 | 21 | 0.026966 | 0.00337  | 0.02267  |
| 0.4   | 100    | 123.4106 | 50690 | 16 | 1.106497 | 0.00337  | 0.02193  |
| 11.7  | 100    | 99.2947  | 37697 | 25 | 0.055688 | 0.003674 | 0.02524  |
| 85    | 8.184  | 69.6621  | 25617 | 44 | 0.001116 | 0.003736 | 0.02735  |
| 44.6  | 100    | 72.3624  | 26562 | 39 | 0.004151 | 0.003967 | 0.02879  |
| 82.5  | 100    | 32.7805  | 11058 | 14 | 1.177903 | 0.005618 | 0.03866  |
| 16.8  | 100    | 14.1914  | 3894  | 34 | 0.012449 | 0.00573  | 0.03999  |
| 28.8  | 100    | 66.9836  | 22648 | 8  | 5.895573 | 0.00599  | 0.04493  |
| 4.4   | 100    | 94.3451  | 36137 | 16 | 0.70204  | 0.006926 | 0.05049  |
| 34    | 100    | 31.7741  | 10678 | 14 | 1.181566 | 0.006926 | 0.05067  |
| 12    | 100    | 77.511   | 27371 | 31 | 0.020043 | 0.007836 | 0.05662  |
| 17.8  | 100    | 71.3461  | 26140 | 30 | 0.034797 | 0.008171 | 0.05989  |
| 14.2  | 100    | 67.5127  | 22856 | 14 | 1.745621 | 0.008559 | 0.06426  |
| 7.4   | 100    | 100.6526 | 35957 | 12 | 1.153904 | 0.008746 | 0.06637  |
| 6.3   | 100    | 71.3996  | 26161 | 21 | 0.278583 | 0.008997 | 0.0679   |
| 3.2   | 100    | 45.534   | 14507 | 25 | 0.030356 | 0.009514 | 0.07346  |

|       |        |          |       |     |          |          |          |
|-------|--------|----------|-------|-----|----------|----------|----------|
| 4.8   | 100    | 69.2547  | 25585 | 62  | 2.36E-05 | 0        | 0.000644 |
| 6.9   | 100    | 136.001  | 55738 | 111 | 3.63E-10 | 0        | 3.48E-11 |
| 16.5  | 100    | 136.5055 | 55913 | 118 | 6.17E-11 | 0        | 9.75E-12 |
| 14.9  | 100    | 137.0086 | 56093 | 91  | 3.69E-08 | 0        | 2.11E-10 |
| 7     | 100    | 60.1528  | 20190 | 35  | 0.007539 | 0        | 2.13E-05 |
| 12.1  | 100    | 86.9951  | 30525 | 43  | 0.002557 | 0        | 4.38E-06 |
| 9.5   | 100    | 86.9618  | 30511 | 35  | 0.013162 | 0        | 0.000423 |
| 20.1  | 75.363 | 86.4908  | 30308 | 61  | 3.9E-05  | 0        | 5.1E-08  |
| 25.8  | 87.479 | 86.19    | 30173 | 50  | 0.000493 | 0        | 4.7E-07  |
| 25.3  | 100    | 87.7001  | 30813 | 36  | 0.010444 | 0        | 7.07E-05 |
| 22.8  | 69.178 | 120.537  | 44149 | 51  | 0.000295 | 0        | 0.000272 |
| 24.8  | 100    | 120.4064 | 44093 | 84  | 1.55E-07 | 0        | 7.39E-07 |
| 11.3  | 36.356 | 141.3015 | 52715 | 81  | 2.94E-07 | 0        | 1.25E-10 |
| 21    | 55.919 | 141.303  | 52716 | 82  | 2.45E-07 | 0        | 1.47E-09 |
| 56.2  | 98.09  | 140.7753 | 52424 | 88  | 1.31E-08 | 0        | 4.7E-11  |
| 121.3 | 100    | 14.3361  | 4229  | 20  | 0.436489 | 0        | 0.000541 |
| 184.5 | 48.256 | 61.3575  | 22182 | 51  | 0.000259 | 0        | 0.00145  |
| 85.8  | 100    | 16.344   | 4787  | 39  | 0.00301  | 0        | 0.000425 |
| 139.9 | 100    | 28.6086  | 9240  | 27  | 0.095167 | 0        | 0.000234 |
| 26.9  | 100    | 28.615   | 9243  | 30  | 0.039581 | 0        | 0.000164 |
| 53.9  | 80.168 | 68.3469  | 27649 | 39  | 0.001508 | 0        | 2.89E-05 |
| 20.5  | 100    | 65.1355  | 26265 | 49  | 0.000604 | 0        | 0.000122 |
| 160.3 | 100    | 15.892   | 4668  | 34  | 0.009784 | 0        | 0.000221 |
| 26.1  | 100    | 15.9143  | 4678  | 52  | 0.000141 | 0        | 0.000262 |
| 4.3   | 100    | 74.9313  | 30477 | 45  | 0.001156 | 0        | 0.000743 |
| 2.8   | 33.563 | 74.874   | 30454 | 82  | 2.45E-07 | 0        | 1.7E-06  |
| 48.5  | 100    | 52.3781  | 19599 | 47  | 0.000662 | 0        | 0.000693 |
| 146.3 | 100    | 16.2947  | 5246  | 32  | 0.022902 | 0.000141 | 0.001797 |
| 45.6  | 100    | 15.9756  | 4582  | 18  | 0.421401 | 0.000273 | 0.002079 |
| 98.4  | 100    | 15.9879  | 4810  | 25  | 0.086853 | 0.000868 | 0.003556 |
| 59    | 100    | 16.3996  | 4849  | 24  | 0.106087 | 0.000951 | 0.00408  |
| 3.9   | 100    | 85.9793  | 30085 | 20  | 0.498978 | 0.000951 | 0.004008 |
| 32.9  | 100    | 21.5582  | 6853  | 29  | 0.026527 | 0.000951 | 0.004498 |
| 28.7  | 100    | 39.0907  | 13757 | 43  | 0.000981 | 0.001022 | 0.004841 |
| 5.6   | 100    | 83.5794  | 31478 | 21  | 0.064709 | 0.001022 | 0.004998 |
| 2.4   | 100    | 60.2334  | 20227 | 33  | 0.011344 | 0.00121  | 0.006788 |
| 9.8   | 100    | 73.4575  | 27032 | 37  | 0.007756 | 0.001308 | 0.006971 |
| 3.6   | 100    | 96.9434  | 37232 | 22  | 0.007412 | 0.001308 | 0.007074 |
| 13.7  | 100    | 73.0408  | 26850 | 33  | 0.024124 | 0.001498 | 0.007713 |
| 101.7 | 20.774 | 34.42    | 12227 | 41  | 0.002881 | 0.002012 | 0.01042  |
| 98.4  | 100    | 66.1969  | 24747 | 41  | 0.001609 | 0.002079 | 0.01191  |
| 23.2  | 100    | 15.0217  | 4358  | 18  | 0.456976 | 0.002257 | 0.0125   |
| 176.9 | 100    | 17.5687  | 5569  | 30  | 0.033003 | 0.002315 | 0.01342  |
| 2     | 100    | 79.937   | 27724 | 28  | 0.071564 | 0.002315 | 0.01369  |
| 8.3   | 100    | 88.5051  | 33185 | 12  | 2.727995 | 0.002376 | 0.0146   |
| 20.5  | 100    | 53.6309  | 19051 | 51  | 0.000324 | 0.002376 | 0.01469  |
| 8.5   | 100    | 21.6733  | 6901  | 35  | 0.005674 | 0.002543 | 0.01596  |
| 8.6   | 100    | 69.0305  | 27944 | 25  | 0.133679 | 0.002843 | 0.01899  |
| 99.1  | 100    | 15.0461  | 4369  | 11  | 2.465322 | 0.002843 | 0.01856  |
| 15    | 100    | 27.156   | 10145 | 29  | 0.033871 | 0.003254 | 0.02134  |
| 5     | 100    | 64.6345  | 26046 | 26  | 0.13457  | 0.003254 | 0.02109  |
| 42    | 100    | 27.1701  | 10151 | 34  | 0.018196 | 0.003674 | 0.02656  |

|       |        |          |       |     |          |          |          |
|-------|--------|----------|-------|-----|----------|----------|----------|
| 92.9  | 100    | 16.254   | 4758  | 14  | 1.418229 | 0.004192 | 0.03036  |
| 2.5   | 100    | 120.0346 | 43938 | 20  | 0.343939 | 0.005792 | 0.04221  |
| 207.2 | 93.067 | 15.7535  | 4593  | 8   | 4.950995 | 0.00599  | 0.04421  |
| 25.6  | 100    | 15.7786  | 4602  | 27  | 0.064676 | 0.00599  | 0.04405  |
| 7.8   | 100    | 120.0368 | 43939 | 25  | 0.127338 | 0.006428 | 0.04797  |
| 14.5  | 100    | 68.5245  | 27730 | 12  | 2.208327 | 0.008962 | 0.06739  |
| 160.9 | 53.409 | 34.2895  | 12177 | 23  | 0.214584 | 0.009858 | 0.08063  |
| 53.8  | 100    | 27.1886  | 8973  | 25  | 0.107715 | 0        | 0.000898 |
| 17.2  | 100    | 16.8039  | 4931  | 67  | 8.41E-06 | 0        | 3.52E-05 |
| 42.9  | 100    | 16.3718  | 4742  | 45  | 0.000429 | 0        | 2.05E-05 |
| 20.3  | 100    | 140.7022 | 52074 | 77  | 2.05E-07 | 0        | 4.15E-09 |
| 30.3  | 39.271 | 53.9555  | 19669 | 61  | 2.44E-05 | 0        | 0.000371 |
| 57.3  | 100    | 16.8983  | 5242  | 54  | 0.000172 | 0        | 0.000516 |
| 12    | 100    | 70.7007  | 24484 | 38  | 0.005485 | 0        | 0.000924 |
| 5     | 100    | 140.7745 | 57598 | 99  | 1.36E-09 | 0        | 1.05E-10 |
| 5.4   | 100    | 140.7457 | 57585 | 113 | 5.38E-11 | 0        | 1.63E-10 |
| 94.1  | 23.912 | 28.8719  | 10049 | 34  | 0.013781 | 0        | 4.94E-05 |
| 25.8  | 100    | 28.3681  | 9861  | 32  | 0.024642 | 0        | 0.001316 |
| 15.4  | 100    | 140.7989 | 55385 | 99  | 5.03E-09 | 0        | 9.73E-11 |
| 25.1  | 58.894 | 140.6865 | 55320 | 67  | 6.93E-06 | 0        | 2.05E-05 |
| 3.6   | 34.276 | 140.6265 | 55287 | 43  | 0.002326 | 0        | 0.000309 |
| 9.7   | 100    | 16.3685  | 4521  | 47  | 0.000263 | 0        | 0.000113 |
| 5.8   | 100    | 93.8471  | 33304 | 36  | 0.01008  | 0        | 0.001218 |
| 0.4   | 100    | 79.5315  | 27559 | 48  | 0.00047  | 0        | 6.95E-05 |
| 8.9   | 11.624 | 79.3499  | 27488 | 68  | 4.8E-06  | 0        | 1.08E-06 |
| 0.4   | 100    | 79.0268  | 27363 | 34  | 0.014347 | 0        | 0.000942 |
| 4.2   | 100    | 78.8481  | 27298 | 39  | 0.004277 | 0        | 0.00065  |
| 8.6   | 21.657 | 79.8542  | 27692 | 67  | 6.5E-06  | 0        | 3.41E-07 |
| 86.6  | 31.386 | 74.063   | 25435 | 48  | 0.00034  | 0        | 0.00077  |
| 74.9  | 23.265 | 74.0509  | 25430 | 66  | 5.32E-06 | 0        | 3.55E-05 |
| 199.4 | 25.636 | 140.5962 | 55269 | 77  | 9.31E-07 | 0        | 4.15E-08 |
| 0     | 100    | 80.5425  | 27971 | 52  | 0.000213 | 0        | 0.000103 |
| 6.9   | 28.186 | 80.3578  | 27891 | 70  | 2.99E-06 | 0        | 1.64E-07 |
| 1.3   | 100    | 80.0349  | 27763 | 50  | 0.000331 | 0        | 0.00027  |
| 7.6   | 100    | 80.8609  | 28098 | 54  | 0.000145 | 0        | 8.4E-07  |
| 2.8   | 100    | 83.0008  | 28938 | 51  | 0.000346 | 0        | 3.98E-05 |
| 48.5  | 20.378 | 140.7776 | 52426 | 97  | 9.2E-09  | 0        | 2.17E-11 |
| 31.4  | 28.957 | 140.7796 | 52428 | 74  | 1.6E-06  | 0        | 1.42E-09 |
| 92.8  | 71.974 | 60.0732  | 21591 | 42  | 0.003318 | 0        | 0.000404 |
| 0     | 100    | 140.0998 | 52072 | 47  | 0.00018  | 0        | 1.42E-05 |
| 48.9  | 100    | 140.1421 | 52092 | 73  | 6.65E-07 | 0        | 3.66E-10 |
| 14.6  | 100    | 120.1569 | 46509 | 55  | 0.000127 | 0        | 3.74E-06 |
| 25.6  | 77.131 | 120.1078 | 46486 | 54  | 0.000159 | 0        | 2.82E-08 |
| 71.7  | 65.485 | 140.3391 | 52187 | 79  | 4.44E-07 | 0        | 6.83E-11 |
| 71.7  | 65.485 | 140.3391 | 52187 | 79  | 4.44E-07 | 0        | 9.83E-11 |
| 5.9   | 100    | 115.5828 | 44594 | 40  | 0.002973 | 0        | 0.000381 |
| 2.7   | 100    | 115.0798 | 44372 | 59  | 4.41E-05 | 0        | 3.46E-05 |
| 14.8  | 100    | 114.6163 | 44177 | 48  | 0.000579 | 0        | 0.000223 |
| 38.9  | 13.932 | 114.574  | 44158 | 68  | 5.14E-06 | 0        | 3.15E-08 |
| 93.5  | 39.676 | 140.3702 | 52203 | 69  | 3.72E-06 | 0        | 5.56E-12 |
| 61.2  | 100    | 140.3834 | 52209 | 68  | 4.01E-06 | 0        | 1.24E-11 |
| 71.7  | 100    | 106.8499 | 41438 | 57  | 4.67E-05 | 0        | 0.000204 |



|       |        |          |       |    |          |          |          |
|-------|--------|----------|-------|----|----------|----------|----------|
| 62.3  | 21.028 | 107.3562 | 41659 | 79 | 2.65E-07 | 0        | 1.28E-05 |
| 45.4  | 9.655  | 62.9183  | 23195 | 65 | 2.03E-06 | 0        | 4.4E-05  |
| 24.6  | 100    | 62.478   | 23005 | 39 | 0.000854 | 0        | 0.000842 |
| 37.3  | 100    | 39.4785  | 13792 | 48 | 0.000206 | 0        | 5.45E-05 |
| 31.8  | 100    | 38.9731  | 13594 | 38 | 0.00222  | 0        | 0.00023  |
| 43.6  | 100    | 17.4767  | 5843  | 54 | 0.00012  | 0        | 1.39E-06 |
| 52.8  | 5.159  | 44.2625  | 15251 | 87 | 5.3E-08  | 0        | 1.12E-09 |
| 5.1   | 100    | 129.9231 | 49517 | 45 | 0.00044  | 0        | 5.72E-06 |
| 14.5  | 78.716 | 116.3569 | 43663 | 88 | 7.33E-08 | 0        | 4.2E-09  |
| 20.3  | 28.056 | 89.5075  | 34178 | 46 | 0.000444 | 0        | 5.97E-05 |
| 21.4  | 10.916 | 116.4978 | 43730 | 64 | 1.88E-05 | 0        | 1.02E-06 |
| 18.6  | 100    | 89.5193  | 34183 | 79 | 2.24E-07 | 0        | 3.53E-07 |
| 5.1   | 100    | 117.0012 | 43948 | 53 | 0.000235 | 0        | 1.81E-05 |
| 9     | 100    | 47.6497  | 17090 | 79 | 2.6E-08  | 0        | 3.1E-05  |
| 0     | 100    | 46.6398  | 16711 | 55 | 5.38E-06 | 0        | 0.000336 |
| 25.5  | 100    | 81.1757  | 28960 | 53 | 0.00018  | 0        | 0.000789 |
| 26.3  | 100    | 18.5798  | 6415  | 49 | 0.000537 | 0        | 9.83E-05 |
| 0.8   | 100    | 47.1441  | 16901 | 58 | 2.83E-06 | 0.000141 | 0.001626 |
| 13.3  | 100    | 68.6586  | 23638 | 32 | 0.019608 | 0.000141 | 0.0018   |
| 22.5  | 100    | 17.5527  | 5561  | 36 | 0.006183 | 0.000141 | 0.00174  |
| 6.2   | 100    | 16.3303  | 4631  | 26 | 0.037689 | 0.000273 | 0.001897 |
| 22.9  | 100    | 59.5629  | 21383 | 35 | 0.016428 | 0.000273 | 0.002016 |
| 14.3  | 100    | 43.7554  | 15041 | 34 | 0.009944 | 0.000273 | 0.002062 |
| 107.1 | 100    | 51.8827  | 16985 | 16 | 0.974715 | 0.000273 | 0.001887 |
| 26.2  | 100    | 49.8066  | 18479 | 56 | 8.69E-05 | 0.000525 | 0.002311 |
| 48.9  | 100    | 81.6802  | 29172 | 49 | 0.000481 | 0.000525 | 0.002417 |
| 192.1 | 100    | 18.9372  | 6198  | 30 | 0.02742  | 0.000525 | 0.002326 |
| 51.2  | 100    | 88.3508  | 31926 | 49 | 5.34E-05 | 0.000525 | 0.00254  |
| 211.2 | 100    | 16.882   | 5234  | 30 | 0.040261 | 0.000758 | 0.003184 |
| 120.5 | 27.538 | 88.8561  | 32125 | 61 | 3.24E-06 | 0.000951 | 0.003937 |
| 168.3 | 71.088 | 14.1039  | 3962  | 27 | 0.077322 | 0.000951 | 0.004158 |
| 52.1  | 100    | 24.4733  | 9032  | 18 | 0.661795 | 0.000951 | 0.003621 |
| 48.8  | 100    | 21.269   | 7647  | 54 | 0.000149 | 0.000951 | 0.00397  |
| 80    | 47.74  | 18.7108  | 6479  | 27 | 0.090827 | 0.000951 | 0.004548 |
| 50.1  | 100    | 16.764   | 4914  | 30 | 0.040897 | 0.001022 | 0.005145 |
| 6.5   | 100    | 82.4982  | 28721 | 34 | 0.016105 | 0.001022 | 0.004766 |
| 4.4   | 100    | 97.8253  | 37620 | 38 | 0.003572 | 0.001114 | 0.005921 |
| 166.5 | 100    | 16.6725  | 5133  | 54 | 0.000154 | 0.001114 | 0.006439 |
| 72.9  | 100    | 16.7262  | 4649  | 29 | 0.054299 | 0.00121  | 0.006752 |
| 27.8  | 100    | 19.8431  | 5834  | 24 | 0.09822  | 0.00141  | 0.007313 |
| 87.9  | 100    | 19.5027  | 6437  | 23 | 0.117544 | 0.001498 | 0.007529 |
| 34.1  | 100    | 16.9053  | 4708  | 30 | 0.03589  | 0.001576 | 0.00845  |
| 33.4  | 100    | 24.9454  | 8209  | 41 | 0.001991 | 0.001758 | 0.009241 |
| 108.7 | 100    | 53.9753  | 19677 | 43 | 0.001521 | 0.001854 | 0.009765 |
| 18.8  | 100    | 73.5423  | 25207 | 36 | 0.006033 | 0.002012 | 0.01122  |
| 31.8  | 100    | 53.4724  | 19474 | 31 | 0.025992 | 0.002012 | 0.01093  |
| 25.4  | 100    | 14.1143  | 3967  | 38 | 0.005999 | 0.002012 | 0.01131  |
| 2.4   | 100    | 112.7597 | 43876 | 43 | 0.00079  | 0.002079 | 0.01155  |
| 25.6  | 100    | 18.9456  | 6202  | 41 | 0.001978 | 0.002079 | 0.01211  |
| 44.1  | 100    | 16.6285  | 4737  | 25 | 0.111761 | 0.002376 | 0.01458  |
| 19.3  | 100    | 45.5388  | 15775 | 18 | 0.406922 | 0.002376 | 0.01491  |
| 536.7 | 85.18  | 16.6587  | 5126  | 26 | 0.101725 | 0.002543 | 0.01627  |

|       |        |          |       |     |          |          |          |
|-------|--------|----------|-------|-----|----------|----------|----------|
| 27.3  | 33.372 | 107.3401 | 41652 | 38  | 0.003366 | 0.002719 | 0.01685  |
| 29.9  | 100    | 32.7972  | 11143 | 34  | 0.013096 | 0.002777 | 0.01784  |
| 36.9  | 100    | 16.6253  | 4855  | 44  | 0.001685 | 0.002777 | 0.01784  |
| 24.7  | 100    | 93.3455  | 33115 | 22  | 0.215    | 0.002843 | 0.01833  |
| 0.4   | 100    | 140.502  | 57465 | 18  | 0.100848 | 0.002843 | 0.01926  |
| 7.5   | 100    | 15.7412  | 4430  | 47  | 0.000457 | 0.002843 | 0.01879  |
| 2.8   | 100    | 89.0032  | 33965 | 25  | 0.065247 | 0.003096 | 0.0201   |
| 17.4  | 100    | 26.9861  | 9322  | 15  | 1.064452 | 0.00337  | 0.02333  |
| 18.1  | 100    | 24.2477  | 7936  | 39  | 0.004082 | 0.00337  | 0.02287  |
| 52.6  | 100    | 14.1348  | 3976  | 42  | 0.001229 | 0.00337  | 0.02224  |
| 18.9  | 100    | 25.367   | 8215  | 39  | 0.00323  | 0.003674 | 0.02522  |
| 1.9   | 100    | 41.2024  | 14054 | 32  | 0.020723 | 0.003674 | 0.0253   |
| 44.1  | 100    | 73.5607  | 25216 | 19  | 0.309234 | 0.003736 | 0.02662  |
| 91.3  | 92.96  | 43.0314  | 14758 | 44  | 0.00144  | 0.003892 | 0.02825  |
| 59.5  | 100    | 15.1426  | 4413  | 18  | 0.584333 | 0.003892 | 0.02854  |
| 80.5  | 100    | 25.4746  | 8425  | 29  | 0.036043 | 0.003892 | 0.02852  |
| 45.2  | 100    | 15.7818  | 4707  | 45  | 0.000741 | 0.004643 | 0.0337   |
| 2.9   | 100    | 113.2791 | 44107 | 37  | 0.002775 | 0.005556 | 0.03805  |
| 82.4  | 100    | 16.4815  | 5039  | 12  | 0.930513 | 0.005618 | 0.03889  |
| 41.4  | 100    | 41.3995  | 13006 | 24  | 0.142684 | 0.005618 | 0.03831  |
| 77.8  | 100    | 42.5224  | 14553 | 39  | 0.00538  | 0.00573  | 0.04123  |
| 180.8 | 100    | 14.1403  | 4131  | 15  | 1.083719 | 0.00599  | 0.0438   |
| 15.7  | 100    | 81.6838  | 29174 | 26  | 0.090508 | 0.006428 | 0.04694  |
| 237.7 | 68.577 | 32.8805  | 11177 | 20  | 0.318822 | 0.007636 | 0.05522  |
| 1.2   | 100    | 87.6887  | 33449 | 16  | 0.440589 | 0.007714 | 0.05546  |
| 12.4  | 100    | 81.3626  | 28289 | 16  | 0.79107  | 0.008293 | 0.06232  |
| 165.3 | 100    | 17.1816  | 5379  | 17  | 0.764347 | 0.008559 | 0.06476  |
| 90.5  | 30.23  | 15.7227  | 4947  | 46  | 0.000609 | 0.008897 | 0.06717  |
| 4.9   | 100    | 97.7869  | 37602 | 19  | 0.289567 | 0.008997 | 0.06999  |
| 9.5   | 100    | 73.1697  | 25498 | 22  | 0.222079 | 0.009498 | 0.07201  |
| 47.1  | 100    | 51.3778  | 16787 | 14  | 1.694284 | 0.009514 | 0.07347  |
| 2     | 100    | 80.0425  | 27766 | 35  | 0.009618 | 0.009858 | 0.08049  |
| 19.7  | 100    | 77.8075  | 28844 | 47  | 0.000779 | 0        | 0.000519 |
| 79.4  | 24.677 | 77.405   | 28700 | 65  | 1.25E-05 | 0        | 0.000119 |
| 60.1  | 42.407 | 77.306   | 28662 | 73  | 1.98E-06 | 0        | 1.5E-07  |
| 18.7  | 96.889 | 73.837   | 27363 | 73  | 1.31E-06 | 0        | 0.000145 |
| 21.1  | 58.805 | 73.332   | 27173 | 68  | 3.91E-06 | 0        | 0.0003   |
| 46.9  | 100    | 37.3253  | 11571 | 47  | 0.000969 | 0        | 2.97E-05 |
| 32.4  | 100    | 21.1752  | 6703  | 57  | 4.26E-05 | 0        | 0.001059 |
| 1.9   | 100    | 39.3429  | 13529 | 40  | 0.004909 | 0        | 0.000204 |
| 17.1  | 100    | 36.3202  | 11210 | 43  | 0.002568 | 0        | 2.66E-05 |
| 42.5  | 5.362  | 36.8228  | 11392 | 55  | 0.000142 | 0        | 3.76E-06 |
| 13.3  | 100    | 109.4335 | 41085 | 54  | 0.000116 | 0        | 0.000787 |
| 1.9   | 100    | 108.9298 | 40911 | 48  | 0.000418 | 0        | 0.000773 |
| 205.5 | 100    | 12.9686  | 3489  | 31  | 0.027354 | 0        | 1.19E-05 |
| 10.8  | 100    | 60.2061  | 22060 | 70  | 2.8E-06  | 0        | 8.76E-07 |
| 54.6  | 6.353  | 100.2797 | 41206 | 102 | 3.02E-09 | 0        | 1.01E-12 |
| 14.5  | 76.846 | 99.9965  | 41087 | 93  | 1.94E-08 | 0        | 2.91E-10 |
| 10.1  | 100    | 99.7754  | 40989 | 65  | 1.32E-05 | 0        | 1.68E-06 |
| 11.4  | 62.394 | 100.499  | 41299 | 70  | 4.68E-06 | 0        | 6.21E-09 |
| 4.4   | 100    | 99.2669  | 40766 | 31  | 0.033922 | 0        | 0.001158 |
| 25.5  | 23.588 | 100.7808 | 41410 | 91  | 3.81E-08 | 0        | 1.68E-11 |

|      |        |          |       |    |          |   |          |
|------|--------|----------|-------|----|----------|---|----------|
| 1.5  | 100    | 101.002  | 41496 | 54 | 0.000171 | 0 | 7.92E-05 |
| 1.1  | 100    | 104.4639 | 42865 | 63 | 2.4E-05  | 0 | 1.12E-06 |
| 62.8 | 100    | 75.4359  | 26482 | 34 | 0.015278 | 0 | 0.000167 |
| 75.5 | 58.145 | 75.9404  | 26694 | 37 | 0.007016 | 0 | 7.93E-05 |
| 3.3  | 100    | 41.9827  | 15004 | 54 | 0.000169 | 0 | 2.89E-05 |
| 9.6  | 100    | 41.4758  | 14820 | 60 | 4.88E-05 | 0 | 1.84E-07 |
| 10.3 | 23.451 | 60.1875  | 22052 | 82 | 1.47E-07 | 0 | 3.03E-07 |
| 4.2  | 100    | 59.6813  | 21859 | 29 | 0.029962 | 0 | 0.001041 |
| 28.2 | 100    | 23.419   | 7995  | 54 | 8.15E-05 | 0 | 0.000868 |
| 36.5 | 100    | 20.9303  | 7010  | 57 | 1.67E-05 | 0 | 0.001452 |
| 16.9 | 100    | 60.5639  | 20163 | 42 | 0.002157 | 0 | 0.000511 |
| 67.5 | 100    | 61.0729  | 20358 | 68 | 5.49E-06 | 0 | 0.00014  |
| 27.6 | 100    | 39.801   | 12453 | 50 | 0.000488 | 0 | 5.27E-05 |
| 45.3 | 5.691  | 38.7852  | 12109 | 55 | 0.000139 | 0 | 1.21E-05 |
| 26.2 | 100    | 38.278   | 11919 | 64 | 1.8E-05  | 0 | 8.27E-07 |
| 29.3 | 100    | 39.2879  | 12279 | 54 | 0.000179 | 0 | 1.93E-06 |
| 15.8 | 100    | 73.3127  | 26970 | 36 | 0.007384 | 0 | 0.000712 |
| 16.1 | 47.801 | 73.1769  | 26908 | 53 | 0.000141 | 0 | 2.89E-05 |
| 45.2 | 100    | 73.053   | 26856 | 64 | 1.12E-05 | 0 | 1.12E-07 |
| 15.8 | 100    | 14.8062  | 4102  | 36 | 0.010568 | 0 | 0.000426 |
| 27.9 | 100    | 73.5062  | 27053 | 36 | 0.007771 | 0 | 4.83E-05 |
| 57   | 6.996  | 75.6595  | 27895 | 65 | 1.2E-05  | 0 | 0.000108 |
| 30.3 | 7.011  | 75.6472  | 27889 | 88 | 6.43E-08 | 0 | 1.5E-07  |
| 22.1 | 12.901 | 73.5565  | 27074 | 71 | 2.53E-06 | 0 | 7.03E-07 |
| 1.6  | 100    | 126.3951 | 49156 | 33 | 0.019554 | 0 | 0.000264 |
| 2    | 100    | 124.7486 | 48485 | 54 | 0.000175 | 0 | 3.01E-06 |
| 8.8  | 100    | 124.2447 | 48268 | 79 | 5.71E-07 | 0 | 4.02E-09 |
| 28.1 | 100    | 123.7408 | 48060 | 76 | 1.07E-06 | 0 | 1.26E-09 |
| 44.4 | 100    | 140.1357 | 52089 | 50 | 0.000172 | 0 | 1.51E-10 |
| 9.6  | 100    | 100.224  | 38106 | 30 | 0.049684 | 0 | 0.000545 |
| 9.6  | 100    | 100.224  | 38106 | 30 | 0.049684 | 0 | 0.000545 |
| 19.7 | 63.042 | 103.2678 | 39416 | 42 | 0.002934 | 0 | 1.28E-08 |
| 15.6 | 100    | 103.2539 | 39410 | 61 | 3.66E-05 | 0 | 7.63E-09 |
| 18.7 | 15.13  | 106.2861 | 40712 | 70 | 3.91E-06 | 0 | 4.41E-06 |
| 29.7 | 3.819  | 106.2604 | 40700 | 58 | 6.35E-05 | 0 | 1.57E-05 |
| 7    | 100    | 105.7779 | 40485 | 45 | 0.001237 | 0 | 0.000509 |
| 10.2 | 100    | 111.366  | 41521 | 50 | 0.00027  | 0 | 2.13E-06 |
| 21.2 | 100    | 17.8726  | 6058  | 46 | 0.000337 | 0 | 0.001257 |
| 17.9 | 100    | 45.3272  | 16173 | 80 | 3.79E-07 | 0 | 8.12E-07 |
| 84.5 | 100    | 45.2949  | 16160 | 37 | 0.007034 | 0 | 0.00036  |
| 10.3 | 100    | 84.9328  | 32076 | 28 | 0.060856 | 0 | 0.000148 |
| 46.1 | 100    | 43.8956  | 15582 | 43 | 0.001825 | 0 | 0.000221 |
| 55.9 | 90.944 | 43.3913  | 15375 | 65 | 1.05E-05 | 0 | 4.61E-06 |
| 20.9 | 100    | 43.3544  | 15361 | 88 | 4.95E-08 | 0 | 3.29E-08 |
| 49.9 | 9.591  | 42.8485  | 15156 | 90 | 3.42E-08 | 0 | 1.76E-08 |
| 94.4 | 1.899  | 42.887   | 15173 | 64 | 1.37E-05 | 0 | 1.62E-05 |
| 30.8 | 100    | 84.8715  | 32050 | 53 | 0.000164 | 0 | 2.94E-08 |
| 41.6 | 100    | 138.3934 | 53158 | 77 | 9.59E-07 | 0 | 4.97E-08 |
| 25.2 | 100    | 42.0726  | 14371 | 29 | 0.039481 | 0 | 0.000902 |
| 13   | 100    | 74.8404  | 27836 | 38 | 0.007448 | 0 | 0.000852 |
| 34.3 | 100    | 42.649   | 16583 | 50 | 0.000491 | 0 | 0.000216 |
| 7.7  | 100    | 95.0312  | 34722 | 68 | 2.24E-06 | 0 | 3.97E-06 |

|       |        |          |       |    |          |          |          |
|-------|--------|----------|-------|----|----------|----------|----------|
| 2     | 100    | 35.2184  | 12261 | 69 | 3.02E-06 | 0        | 0.000319 |
| 21.6  | 100    | 54.562   | 21729 | 46 | 0.001109 | 0        | 1.32E-06 |
| 486.5 | 56.434 | 17.8389  | 6041  | 28 | 0.023    | 0.000141 | 0.001672 |
| 108.4 | 13.561 | 61.0648  | 20354 | 45 | 0.001306 | 0.000141 | 0.001809 |
| 69.7  | 100    | 22.758   | 7738  | 57 | 1.73E-05 | 0.000141 | 0.001634 |
| 121.8 | 4.537  | 60.7934  | 20250 | 48 | 0.00059  | 0.000273 | 0.002001 |
| 7.6   | 100    | 43.8635  | 15568 | 41 | 0.003049 | 0.000273 | 0.001951 |
| 45    | 6.42   | 66.2189  | 24185 | 43 | 0.00054  | 0.000273 | 0.001898 |
| 2.2   | 100    | 35.9287  | 12369 | 56 | 5.68E-05 | 0.000525 | 0.002168 |
| 108.6 | 82.947 | 60.5617  | 20162 | 39 | 0.004975 | 0.000525 | 0.002197 |
| 1.4   | 100    | 118.7787 | 44407 | 34 | 0.015204 | 0.000525 | 0.002366 |
| 39.2  | 100    | 24.2674  | 8330  | 57 | 1.87E-05 | 0.000525 | 0.002393 |
| 40.4  | 100    | 23.7657  | 8131  | 57 | 1.7E-05  | 0.000525 | 0.002566 |
| 17.8  | 100    | 37.1122  | 14276 | 41 | 0.003949 | 0.000525 | 0.002385 |
| 17.4  | 100    | 12.8725  | 3485  | 24 | 0.134867 | 0.00065  | 0.002767 |
| 8.2   | 100    | 72.6035  | 26665 | 32 | 0.023339 | 0.000758 | 0.003096 |
| 57.7  | 9.762  | 36.6016  | 14060 | 41 | 0.00382  | 0.000758 | 0.003127 |
| 30.2  | 100    | 54.98    | 19581 | 50 | 0.000373 | 0.000951 | 0.004344 |
| 2.7   | 100    | 26.7095  | 8035  | 52 | 2.59E-05 | 0.000951 | 0.003893 |
| 4.1   | 100    | 109.4895 | 41105 | 36 | 0.006774 | 0.000951 | 0.003812 |
| 75.9  | 100    | 59.8488  | 21504 | 36 | 0.008735 | 0.000951 | 0.004339 |
| 109.9 | 11.092 | 66.1736  | 24167 | 32 | 0.006896 | 0.000951 | 0.003917 |
| 67.4  | 100    | 23.2606  | 7934  | 57 | 1.71E-05 | 0.001022 | 0.004606 |
| 9.3   | 100    | 38.8141  | 14967 | 27 | 0.083494 | 0.001022 | 0.005351 |
| 3.6   | 100    | 103.7726 | 39636 | 26 | 0.10016  | 0.001022 | 0.005508 |
| 0.4   | 100    | 139.6555 | 54803 | 18 | 0.616288 | 0.001022 | 0.005295 |
| 28.7  | 100    | 16.7821  | 5185  | 38 | 0.001209 | 0.001022 | 0.004857 |
| 3.1   | 100    | 111.3553 | 41516 | 37 | 0.006236 | 0.001022 | 0.005132 |
| 1     | 100    | 108.9888 | 40932 | 37 | 0.005596 | 0.001022 | 0.005179 |
| 6.8   | 100    | 34.299   | 10575 | 42 | 0.002009 | 0.001114 | 0.006154 |
| 41    | 100    | 25.0149  | 8614  | 49 | 0.000121 | 0.001114 | 0.006268 |
| 7.4   | 100    | 107.9368 | 41411 | 29 | 0.051607 | 0.001114 | 0.006156 |
| 3.2   | 100    | 75.1538  | 27682 | 34 | 0.013011 | 0.00121  | 0.006499 |
| 12.4  | 100    | 75.3433  | 28039 | 28 | 0.068312 | 0.00121  | 0.006517 |
| 5.1   | 100    | 138.5199 | 53216 | 32 | 0.02747  | 0.00141  | 0.007242 |
| 26.8  | 100    | 37.829   | 11748 | 20 | 0.439717 | 0.001498 | 0.007561 |
| 4.1   | 100    | 58.0141  | 20771 | 20 | 0.232773 | 0.001576 | 0.008413 |
| 0.4   | 100    | 99.3972  | 35459 | 51 | 0.000185 | 0.001758 | 0.009667 |
| 19.8  | 100    | 70.166   | 23891 | 24 | 0.153673 | 0.001854 | 0.009865 |
| 2.2   | 100    | 105.7579 | 40476 | 25 | 0.116233 | 0.001854 | 0.009903 |
| 28.6  | 100    | 14.564   | 4166  | 30 | 0.036501 | 0.001945 | 0.01005  |
| 41.5  | 84.947 | 74.9436  | 27878 | 46 | 0.001158 | 0.001945 | 0.009975 |
| 125.4 | 100    | 21.9448  | 7416  | 47 | 0.000165 | 0.002012 | 0.01026  |
| 11.3  | 100    | 74.0473  | 25428 | 19 | 0.406377 | 0.002079 | 0.01143  |
| 0.4   | 100    | 124.141  | 48227 | 34 | 0.016899 | 0.002257 | 0.01285  |
| 8.1   | 100    | 76.9009  | 28516 | 31 | 0.028121 | 0.002257 | 0.01295  |
| 2.7   | 100    | 107.2743 | 41106 | 34 | 0.01107  | 0.002257 | 0.01245  |
| 1     | 100    | 125.2536 | 48684 | 12 | 2.838863 | 0.002315 | 0.01414  |
| 23.6  | 100    | 75.4446  | 28079 | 42 | 0.00293  | 0.002315 | 0.01356  |
| 115.4 | 3.586  | 107.2049 | 39810 | 41 | 0.002719 | 0.002315 | 0.01336  |
| 8.1   | 100    | 72.0212  | 26413 | 27 | 0.056857 | 0.002315 | 0.0138   |
| 30.1  | 100    | 76.174   | 28110 | 22 | 0.216833 | 0.002376 | 0.01472  |

|       |        |          |       |     |          |          |          |
|-------|--------|----------|-------|-----|----------|----------|----------|
| 17.4  | 100    | 54.0456  | 17785 | 50  | 0.000372 | 0.002376 | 0.01541  |
| 11.1  | 100    | 37.2044  | 14316 | 33  | 0.022744 | 0.002376 | 0.01493  |
| 7.9   | 100    | 74.8814  | 27581 | 18  | 0.464181 | 0.002543 | 0.01635  |
| 15.8  | 100    | 73.6024  | 27273 | 35  | 0.008013 | 0.002777 | 0.01753  |
| 17.5  | 100    | 11.2845  | 3074  | 35  | 0.012469 | 0.002777 | 0.01751  |
| 10.2  | 100    | 77.1013  | 26621 | 41  | 0.003231 | 0.002777 | 0.01817  |
| 10.2  | 100    | 77.1013  | 26621 | 41  | 0.003231 | 0.002777 | 0.01817  |
| 2.6   | 100    | 74.4084  | 27580 | 41  | 0.002131 | 0.002843 | 0.01843  |
| 7.8   | 100    | 62.1869  | 21000 | 32  | 0.022735 | 0.00302  | 0.01961  |
| 40.1  | 100    | 24.3941  | 8381  | 45  | 0.000652 | 0.003096 | 0.02016  |
| 42.6  | 11.675 | 36.696   | 14104 | 46  | 0.001201 | 0.003254 | 0.02131  |
| 29.8  | 79.544 | 36.1935  | 13893 | 37  | 0.008628 | 0.00337  | 0.02386  |
| 126.8 | 100    | 53.8649  | 19151 | 42  | 0.001118 | 0.00337  | 0.02416  |
| 8.6   | 100    | 72.7265  | 25315 | 41  | 0.00305  | 0.00337  | 0.02404  |
| 8.6   | 100    | 72.7265  | 25315 | 41  | 0.00305  | 0.00337  | 0.02404  |
| 19.9  | 31.505 | 62.9669  | 23215 | 43  | 0.000222 | 0.00337  | 0.02239  |
| 3.7   | 100    | 27.2166  | 8173  | 39  | 0.000561 | 0.003674 | 0.02626  |
| 20.1  | 100    | 36.0987  | 13853 | 21  | 0.384971 | 0.003892 | 0.0285   |
| 3.2   | 100    | 120.2068 | 45327 | 28  | 0.074812 | 0.004266 | 0.03081  |
| 11.2  | 100    | 75.3595  | 25944 | 25  | 0.122056 | 0.004344 | 0.03162  |
| 9.2   | 100    | 77.9084  | 28881 | 27  | 0.080494 | 0.005031 | 0.03505  |
| 47.5  | 100    | 47.5165  | 16613 | 17  | 0.744512 | 0.005687 | 0.03952  |
| 3.7   | 100    | 63.4735  | 23420 | 41  | 0.000393 | 0.005792 | 0.04243  |
| 2.2   | 100    | 118.1634 | 44438 | 18  | 0.708661 | 0.005943 | 0.04335  |
| 267.1 | 77.058 | 52.8554  | 18744 | 38  | 0.003329 | 0.00599  | 0.04422  |
| 13.9  | 100    | 66.7205  | 24395 | 29  | 0.013135 | 0.00599  | 0.04366  |
| 292.4 | 36.977 | 21.4393  | 7209  | 40  | 0.000916 | 0.006497 | 0.04807  |
| 7.9   | 100    | 73.0991  | 27086 | 31  | 0.022489 | 0.006926 | 0.05061  |
| 3.8   | 100    | 71.4354  | 26173 | 27  | 0.049789 | 0.008034 | 0.05867  |
| 248.9 | 52.946 | 20.9021  | 7488  | 40  | 0.000932 | 0.008171 | 0.06017  |
| 3.8   | 100    | 41.0145  | 14636 | 20  | 0.42265  | 0.008559 | 0.06487  |
| 2.6   | 100    | 26.6309  | 8770  | 32  | 0.003143 | 0.009069 | 0.0703   |
| 1.9   | 100    | 102.7628 | 39204 | 15  | 1.407245 | 0.009436 | 0.07162  |
| 2.6   | 100    | 102.5899 | 38614 | 52  | 0.000232 | 0        | 8.15E-05 |
| 34.8  | 23.661 | 102.4794 | 38570 | 81  | 3.44E-07 | 0        | 2.98E-08 |
| 35.7  | 43.342 | 74.6536  | 27675 | 54  | 0.000204 | 0        | 2.65E-06 |
| 35    | 61.397 | 74.6432  | 27670 | 103 | 2.4E-09  | 0        | 4.86E-11 |
| 11.8  | 100    | 74.1486  | 27475 | 37  | 0.010046 | 0        | 0.000274 |
| 21.5  | 100    | 27.5408  | 9106  | 54  | 0.0001   | 0        | 0.00128  |
| 12.8  | 100    | 125.7231 | 46853 | 87  | 7.72E-08 | 0        | 6.58E-10 |
| 2.2   | 100    | 126.6756 | 47173 | 35  | 0.011972 | 0        | 0.001235 |
| 40.9  | 47.214 | 126.9138 | 47253 | 105 | 1.33E-09 | 0        | 9.46E-12 |
| 63.5  | 71.852 | 127.1775 | 47344 | 107 | 8.6E-10  | 0        | 2.51E-11 |
| 72.3  | 100    | 16.5194  | 4806  | 35  | 0.005751 | 0        | 0.000621 |
| 3.3   | 100    | 128.4265 | 47765 | 78  | 6.75E-07 | 0        | 2.76E-08 |
| 37.6  | 82.76  | 127.9209 | 47595 | 108 | 7.19E-10 | 0        | 1.35E-11 |
| 56.5  | 100    | 127.679  | 47512 | 110 | 4.54E-10 | 0        | 4.73E-11 |
| 53.6  | 12.746 | 127.4182 | 47426 | 115 | 1.3E-10  | 0        | 1.15E-12 |
| 16.4  | 100    | 127.3289 | 47393 | 80  | 3.83E-07 | 0        | 1.48E-08 |
| 0.7   | 100    | 128.9528 | 47957 | 28  | 0.067889 | 0        | 0.000956 |
| 3.1   | 100    | 125.3279 | 51448 | 60  | 3.14E-05 | 0        | 9.47E-05 |
| 283.1 | 100    | 16.5576  | 5076  | 39  | 0.001757 | 0        | 2.17E-05 |

|       |        |          |       |    |          |          |          |
|-------|--------|----------|-------|----|----------|----------|----------|
| 4.6   | 100    | 113.175  | 41088 | 38 | 0.005526 | 0        | 0.000454 |
| 7.2   | 100    | 113.6786 | 41308 | 49 | 0.00042  | 0        | 2.45E-05 |
| 133.7 | 79.186 | 48.8179  | 17141 | 38 | 0.004591 | 0        | 1.1E-06  |
| 14.8  | 100    | 25.6478  | 7702  | 67 | 7.89E-06 | 0        | 6.32E-06 |
| 5.1   | 100    | 139.2757 | 51701 | 68 | 6.66E-06 | 0        | 4.23E-06 |
| 8.8   | 100    | 139.7769 | 51923 | 57 | 8.16E-05 | 0        | 7.47E-07 |
| 24.2  | 100    | 138.2594 | 51234 | 51 | 0.000347 | 0        | 1.22E-06 |
| 9.3   | 100    | 93.6366  | 35264 | 48 | 0.000601 | 0        | 2.91E-05 |
| 14.8  | 69.162 | 93.6121  | 35254 | 76 | 1.08E-06 | 0        | 3.43E-08 |
| 2.3   | 100    | 93.53    | 35225 | 40 | 0.004629 | 0        | 0.000301 |
| 12.8  | 90.793 | 93.1107  | 35054 | 51 | 0.000311 | 0        | 5.2E-07  |
| 10.6  | 100    | 94.1385  | 35466 | 68 | 5.88E-06 | 0        | 1.94E-08 |
| 1.6   | 100    | 94.6447  | 35680 | 47 | 0.00073  | 0        | 6.31E-05 |
| 2.2   | 100    | 113.5686 | 43721 | 42 | 0.002102 | 0        | 0.000214 |
| 56.4  | 100    | 140.3002 | 52168 | 48 | 0.000672 | 0        | 3.46E-06 |
| 14.5  | 92.442 | 114.0751 | 43932 | 87 | 7.4E-08  | 0        | 9.63E-12 |
| 4.4   | 100    | 115.0914 | 44377 | 88 | 5.72E-08 | 0        | 5.79E-08 |
| 24.3  | 100    | 43.6919  | 15496 | 29 | 0.051023 | 0        | 0.0007   |
| 89    | 100    | 20.3288  | 6169  | 42 | 0.002276 | 0        | 7.85E-05 |
| 59.2  | 100    | 42.0645  | 14367 | 58 | 4.43E-05 | 0        | 0.000623 |
| 23.2  | 79.901 | 80.8658  | 30343 | 39 | 0.003166 | 0        | 0.000119 |
| 27.4  | 39.749 | 80.3558  | 30121 | 26 | 0.081264 | 0        | 0.001283 |
| 41.2  | 100    | 71.8868  | 26844 | 54 | 0.000158 | 0        | 4.52E-08 |
| 12.8  | 100    | 78.6544  | 29384 | 51 | 0.000117 | 0        | 0.000276 |
| 36.2  | 100    | 66.0416  | 24111 | 71 | 1.68E-06 | 0        | 0.001026 |
| 142.6 | 93.896 | 141.5337 | 54751 | 88 | 5.25E-08 | 0        | 3.97E-10 |
| 63.5  | 100    | 24.825   | 9181  | 47 | 0.000774 | 0        | 0.00022  |
| 30.9  | 25.624 | 36.7725  | 13062 | 67 | 4.86E-06 | 0        | 2.28E-06 |
| 225.1 | 44.766 | 64.5127  | 23848 | 42 | 0.00173  | 0.000141 | 0.001599 |
| 23.8  | 100    | 40.4392  | 14725 | 42 | 0.001861 | 0.000273 | 0.001967 |
| 187.3 | 7.269  | 36.8666  | 14174 | 58 | 4.65E-05 | 0.000273 | 0.001988 |
| 67.3  | 100    | 36.7081  | 14109 | 45 | 0.000928 | 0.000273 | 0.002102 |
| 0.4   | 100    | 128.183  | 47680 | 35 | 0.014856 | 0.000407 | 0.002132 |
| 2.6   | 100    | 127.8348 | 47564 | 36 | 0.010833 | 0.000758 | 0.002926 |
| 9.4   | 97.453 | 56.2295  | 20512 | 70 | 1.27E-06 | 0.000758 | 0.003082 |
| 18.2  | 100    | 39.5472  | 15267 | 32 | 0.0218   | 0.000951 | 0.003904 |
| 317   | 100    | 20.071   | 7118  | 49 | 0.00019  | 0.001022 | 0.00575  |
| 1.1   | 100    | 125.4282 | 46748 | 31 | 0.036752 | 0.001022 | 0.004724 |
| 6.7   | 100    | 134.0448 | 51278 | 26 | 0.109868 | 0.001114 | 0.006079 |
| 11.6  | 100    | 79.1588  | 29609 | 31 | 0.010528 | 0.001114 | 0.006399 |
| 18.3  | 100    | 64.2949  | 23753 | 32 | 0.019166 | 0.00121  | 0.006778 |
| 74    | 100    | 25.3306  | 9408  | 31 | 0.029867 | 0.001758 | 0.009375 |
| 7.5   | 100    | 71.9432  | 26866 | 19 | 0.501758 | 0.001945 | 0.009954 |
| 121.3 | 100    | 33.249   | 11411 | 37 | 0.004615 | 0.002079 | 0.01214  |
| 97.1  | 100    | 16.5756  | 5085  | 43 | 0.000682 | 0.002079 | 0.0117   |
| 21.2  | 100    | 32.4179  | 11160 | 40 | 0.001849 | 0.002315 | 0.01367  |
| 83    | 12.917 | 20.6191  | 6886  | 23 | 0.054489 | 0.002315 | 0.01402  |
| 21.9  | 100    | 35.0642  | 12470 | 43 | 0.000415 | 0.002315 | 0.0134   |
| 16.5  | 100    | 78.6232  | 29370 | 20 | 0.277267 | 0.002315 | 0.01316  |
| 15.2  | 100    | 39.9328  | 14522 | 31 | 0.020764 | 0.002315 | 0.01343  |
| 299.3 | 66.771 | 16.5475  | 5071  | 22 | 0.074911 | 0.002315 | 0.01308  |
| 84    | 30.306 | 28.5556  | 10717 | 43 | 0.001994 | 0.002376 | 0.01461  |

|       |        |          |       |    |          |          |          |
|-------|--------|----------|-------|----|----------|----------|----------|
| 96.2  | 8.929  | 73.1907  | 27121 | 43 | 0.001507 | 0.00337  | 0.02304  |
| 21.5  | 100    | 13.2717  | 3710  | 30 | 0.029993 | 0.00337  | 0.02395  |
| 54    | 100    | 34.5562  | 12275 | 43 | 0.000451 | 0.003533 | 0.02485  |
| 22.7  | 100    | 48.8085  | 17137 | 22 | 0.16996  | 0.003674 | 0.02642  |
| 182.2 | 41.202 | 28.0493  | 9294  | 37 | 0.004468 | 0.003736 | 0.02699  |
| 48.6  | 100    | 25.6615  | 8327  | 32 | 0.010998 | 0.003736 | 0.02728  |
| 21.6  | 100    | 35.141   | 13442 | 38 | 0.004724 | 0.003892 | 0.02851  |
| 4.5   | 100    | 73.3359  | 27175 | 37 | 0.005822 | 0.003892 | 0.02855  |
| 63.5  | 100    | 36.4736  | 14007 | 32 | 0.009156 | 0.004192 | 0.03025  |
| 56.8  | 100    | 32.7562  | 11128 | 40 | 0.002202 | 0.005031 | 0.03503  |
| 0.9   | 100    | 125.2232 | 46674 | 16 | 1.012567 | 0.007057 | 0.05212  |
| 30    | 100    | 34.4766  | 12247 | 35 | 0.00257  | 0.008997 | 0.06825  |
| 27.1  | 100    | 13.4356  | 3802  | 26 | 0.05438  | 0.009914 | 0.0821   |
| 7.6   | 100    | 89.8185  | 33522 | 49 | 0.000527 | 0        | 0.000307 |
| 61    | 79.429 | 90.3235  | 33734 | 96 | 1.03E-08 | 0        | 1.31E-09 |
| 27.7  | 21.863 | 90.2605  | 33709 | 70 | 4.53E-06 | 0        | 8.31E-06 |
| 10.1  | 82.047 | 48.4371  | 15629 | 30 | 0.050126 | 0        | 0.0003   |
| 16.9  | 100    | 68.1484  | 25120 | 47 | 0.000751 | 0        | 0.000137 |
| 69.3  | 100    | 68.6489  | 25336 | 41 | 0.003033 | 0        | 8.24E-06 |
| 20.1  | 100    | 69.1499  | 25542 | 44 | 0.001331 | 0        | 1.96E-05 |
| 15.4  | 100    | 53.1812  | 17461 | 33 | 0.021496 | 0        | 0.00081  |
| 47.1  | 100    | 79.6182  | 29538 | 24 | 0.067996 | 0        | 1.47E-05 |
| 43.6  | 52.575 | 79.4412  | 29469 | 56 | 4.29E-05 | 0        | 5.06E-08 |
| 44.6  | 56.753 | 78.9361  | 29278 | 55 | 5.74E-05 | 0        | 4.19E-08 |
| 13.7  | 100    | 78.5237  | 29111 | 44 | 0.001572 | 0        | 0.000863 |
| 40.6  | 50.1   | 79.9461  | 29665 | 54 | 6.42E-05 | 0        | 9.04E-08 |
| 4.9   | 100    | 81.4622  | 30269 | 47 | 0.000324 | 0        | 4.46E-05 |
| 26.2  | 100    | 80.9558  | 30066 | 51 | 0.000119 | 0        | 1.27E-07 |
| 1.5   | 100    | 52.9344  | 17376 | 37 | 0.008983 | 0        | 0.001402 |
| 28.4  | 100    | 80.4472  | 29860 | 68 | 2.77E-06 | 0        | 3.05E-09 |
| 58.6  | 89.632 | 75.8262  | 28117 | 72 | 2.58E-06 | 0        | 5.19E-05 |
| 72.2  | 14.015 | 75.6358  | 28045 | 49 | 0.000572 | 0        | 1.59E-05 |
| 25.4  | 100    | 74.6967  | 27692 | 64 | 1.64E-05 | 0        | 0.00015  |
| 3.1   | 100    | 76.7853  | 28473 | 44 | 0.000333 | 0        | 0.000938 |
| 34.1  | 100    | 31.7784  | 10680 | 41 | 0.002701 | 0        | 3.57E-05 |
| 24.8  | 100    | 19.6526  | 6136  | 39 | 0.006572 | 0        | 0.000239 |
| 20.7  | 100    | 32.0636  | 9769  | 44 | 0.001302 | 0        | 2.86E-05 |
| 9.1   | 100    | 32.1097  | 9786  | 41 | 0.002428 | 0        | 0.000732 |
| 55.5  | 100    | 27.5296  | 8307  | 31 | 0.021597 | 0        | 0.000167 |
| 17.7  | 100    | 28.8699  | 8731  | 26 | 0.089824 | 0        | 0.001422 |
| 20.4  | 70.445 | 28.9118  | 8743  | 24 | 0.154024 | 0        | 0.001552 |
| 7.3   | 100    | 29.908   | 9062  | 47 | 0.000412 | 0        | 0.001145 |
| 1.8   | 100    | 125.3545 | 46719 | 53 | 0.000228 | 0        | 0.000736 |
| 4.4   | 100    | 112.5105 | 42215 | 51 | 0.000368 | 0        | 1.29E-05 |
| 10.6  | 100    | 116.9247 | 43754 | 60 | 3.26E-05 | 0        | 2.12E-05 |
| 39.9  | 100    | 117.4694 | 43949 | 86 | 7.51E-08 | 0        | 3.81E-08 |
| 61.2  | 39.967 | 117.4263 | 43932 | 67 | 5.29E-06 | 0        | 1.39E-05 |
| 90.2  | 92.354 | 117.2133 | 43854 | 28 | 0.041797 | 0        | 0.001341 |
| 12.9  | 100    | 116.9637 | 43769 | 85 | 9.94E-08 | 0        | 1.04E-07 |
| 4.2   | 100    | 140.0754 | 51791 | 68 | 7.55E-06 | 0        | 1.22E-06 |
| 12.2  | 100    | 128.8326 | 47914 | 82 | 2.76E-07 | 0        | 8.2E-09  |
| 2.6   | 100    | 128.3258 | 47727 | 39 | 0.006135 | 0        | 0.001269 |

|       |        |          |       |     |          |   |          |
|-------|--------|----------|-------|-----|----------|---|----------|
| 3.1   | 100    | 133.2886 | 49462 | 46  | 0.001209 | 0 | 0.000415 |
| 6.1   | 100    | 136.3788 | 50553 | 62  | 2.86E-05 | 0 | 2.01E-06 |
| 6.1   | 100    | 136.3229 | 50532 | 43  | 0.001726 | 0 | 8.93E-06 |
| 4.9   | 100    | 135.8192 | 50359 | 44  | 0.001325 | 0 | 9.05E-05 |
| 79.9  | 75.353 | 135.3059 | 50185 | 74  | 1.68E-06 | 0 | 3.15E-09 |
| 9.7   | 100    | 134.9968 | 50083 | 65  | 1.29E-05 | 0 | 1.03E-06 |
| 39.3  | 100    | 134.9329 | 50061 | 78  | 7.24E-07 | 0 | 9.75E-09 |
| 92    | 12.818 | 134.8024 | 50017 | 80  | 4.08E-07 | 0 | 1.04E-09 |
| 29.8  | 100    | 134.4951 | 49909 | 84  | 1.66E-07 | 0 | 1.22E-08 |
| 51.3  | 41.604 | 134.4305 | 49888 | 88  | 7.77E-08 | 0 | 8E-10    |
| 115.4 | 6.855  | 134.299  | 49836 | 83  | 2.24E-07 | 0 | 2.26E-09 |
| 40.6  | 45.217 | 133.9942 | 49722 | 83  | 2.39E-07 | 0 | 1.25E-08 |
| 96.6  | 36.724 | 133.9282 | 49698 | 91  | 3.23E-08 | 0 | 7.44E-11 |
| 64.8  | 2.038  | 133.7939 | 49645 | 77  | 8.06E-07 | 0 | 5.22E-09 |
| 1.5   | 100    | 138.9857 | 51414 | 36  | 0.012202 | 0 | 0.000681 |
| 40.4  | 71.488 | 112.4074 | 46166 | 79  | 5.94E-07 | 0 | 2.22E-09 |
| 2.7   | 27.978 | 131.3974 | 53895 | 103 | 1.58E-09 | 0 | 5.25E-07 |
| 26.9  | 7.011  | 131.3435 | 53873 | 71  | 3.03E-06 | 0 | 6.29E-06 |
| 12.8  | 100    | 131.5739 | 53968 | 58  | 7.18E-05 | 0 | 1.06E-06 |
| 4.2   | 100    | 136.114  | 55779 | 46  | 0.001048 | 0 | 0.000474 |
| 6.8   | 100    | 135.6117 | 55602 | 57  | 9.18E-05 | 0 | 1.44E-05 |
| 25    | 100    | 135.1095 | 55410 | 77  | 9.09E-07 | 0 | 1.74E-09 |
| 10    | 100    | 134.6137 | 55225 | 52  | 0.000296 | 0 | 0.000185 |
| 60.3  | 28.48  | 134.606  | 55222 | 76  | 1.14E-06 | 0 | 5.63E-09 |
| 31.1  | 76.678 | 134.1123 | 55037 | 75  | 1.36E-06 | 0 | 1.43E-08 |
| 66.8  | 7.916  | 134.1016 | 55032 | 76  | 1.09E-06 | 0 | 1.62E-08 |
| 30.3  | 41.375 | 133.6048 | 54828 | 72  | 3.04E-06 | 0 | 4.29E-07 |
| 112.9 | 5.652  | 133.5986 | 54825 | 82  | 2.56E-07 | 0 | 4.95E-09 |
| 11    | 100    | 133.1855 | 54661 | 59  | 5.73E-05 | 0 | 1.73E-06 |
| 31.1  | 22.912 | 133.1003 | 54625 | 71  | 3.3E-06  | 0 | 6.99E-08 |
| 124.4 | 3.943  | 133.0919 | 54621 | 79  | 4.96E-07 | 0 | 4.33E-09 |
| 101.1 | 9.811  | 132.5928 | 54408 | 93  | 2.29E-08 | 0 | 2.81E-10 |
| 117.2 | 2.488  | 132.5867 | 54405 | 67  | 7.83E-06 | 0 | 2.29E-08 |
| 10    | 29.513 | 132.1672 | 54228 | 47  | 0.000977 | 0 | 9.06E-05 |
| 89.9  | 6.242  | 132.0872 | 54191 | 80  | 4.52E-07 | 0 | 2.51E-09 |
| 120.1 | 1.159  | 132.0815 | 54188 | 88  | 6.28E-08 | 0 | 1.61E-09 |
| 13.5  | 100    | 123.2728 | 50636 | 65  | 1.46E-05 | 0 | 1.7E-07  |
| 4.4   | 100    | 122.7659 | 50434 | 54  | 0.000165 | 0 | 7.14E-06 |
| 5     | 100    | 127.3982 | 52282 | 33  | 0.021256 | 0 | 0.000582 |
| 14.5  | 100    | 126.8516 | 52055 | 87  | 9.34E-08 | 0 | 1.31E-09 |
| 11    | 100    | 86.8633  | 35481 | 34  | 0.015915 | 0 | 0.00096  |
| 5     | 100    | 89.7213  | 36697 | 46  | 0.001134 | 0 | 0.000367 |
| 7.6   | 71.44  | 89.7036  | 36690 | 47  | 0.000771 | 0 | 0.000337 |
| 53    | 3.503  | 89.2195  | 36490 | 89  | 5.67E-08 | 0 | 1.23E-08 |
| 63.5  | 0.844  | 89.199   | 36480 | 78  | 5.74E-07 | 0 | 1.1E-07  |
| 90.8  | 1.185  | 88.7091  | 36288 | 92  | 2.81E-08 | 0 | 7.86E-08 |
| 60.6  | 0.387  | 88.6867  | 36278 | 79  | 5.59E-07 | 0 | 3.88E-07 |
| 6.4   | 100    | 87.3663  | 35704 | 50  | 0.000435 | 0 | 0.000467 |
| 5.5   | 100    | 77.6844  | 31623 | 53  | 0.000211 | 0 | 0.000223 |
| 109.6 | 3.107  | 83.3331  | 33947 | 43  | 0.000731 | 0 | 0.001006 |
| 50.8  | 28.44  | 82.9572  | 33781 | 55  | 4.4E-05  | 0 | 0.001351 |
| 3.1   | 100    | 105.9608 | 43524 | 66  | 7E-06    | 0 | 8.48E-05 |



|       |        |          |       |     |          |   |          |
|-------|--------|----------|-------|-----|----------|---|----------|
| 8.6   | 99.098 | 92.9964  | 38079 | 71  | 3.49E-06 | 0 | 1.34E-05 |
| 44.6  | 100    | 92.9863  | 38074 | 90  | 3.8E-08  | 0 | 2.11E-10 |
| 12.2  | 79.333 | 96.0843  | 39408 | 52  | 0.000195 | 0 | 0.000529 |
| 8     | 30.051 | 96.0704  | 39401 | 71  | 2.32E-06 | 0 | 3.08E-05 |
| 5.2   | 100    | 136.6156 | 55954 | 58  | 8.09E-05 | 0 | 3.43E-06 |
| 9.8   | 100    | 137.3391 | 56217 | 42  | 0.002547 | 0 | 7.64E-05 |
| 68.2  | 100    | 16.562   | 5078  | 50  | 0.000388 | 0 | 0.001276 |
| 32    | 100    | 140.1506 | 57301 | 72  | 2.02E-06 | 0 | 5.31E-06 |
| 44.7  | 100    | 26.3638  | 9098  | 38  | 0.004319 | 0 | 7.85E-05 |
| 54.4  | 100    | 28.2174  | 9806  | 29  | 0.030668 | 0 | 0.000138 |
| 72.3  | 100    | 24.0766  | 8256  | 27  | 0.047719 | 0 | 0.00051  |
| 25.2  | 100    | 19.9582  | 6617  | 31  | 0.034845 | 0 | 0.000552 |
| 14.8  | 31.151 | 127.3021 | 46851 | 61  | 3.15E-05 | 0 | 3.64E-05 |
| 42    | 61.361 | 127.3388 | 46866 | 88  | 7.47E-08 | 0 | 9.92E-10 |
| 27.9  | 100    | 28.1409  | 8484  | 31  | 0.02721  | 0 | 0.000242 |
| 33.4  | 100    | 26.1203  | 7787  | 28  | 0.044842 | 0 | 0.001347 |
| 96.7  | 100    | 15.9117  | 4377  | 51  | 0.000205 | 0 | 0.001533 |
| 16.2  | 12.997 | 133.0927 | 49094 | 82  | 2.33E-07 | 0 | 3.08E-05 |
| 13    | 100    | 32.9997  | 10140 | 44  | 0.001205 | 0 | 0.000019 |
| 9.8   | 100    | 30.5712  | 9311  | 58  | 3.07E-05 | 0 | 0.000346 |
| 8.8   | 10.298 | 115.4342 | 42065 | 57  | 6.42E-05 | 0 | 0.000352 |
| 6.8   | 15.184 | 115.4646 | 42078 | 114 | 1.48E-10 | 0 | 1.06E-08 |
| 4.4   | 100    | 98.007   | 34923 | 55  | 8.26E-05 | 0 | 0.000131 |
| 2.4   | 100    | 97.9752  | 34911 | 48  | 0.000457 | 0 | 0.000353 |
| 23.8  | 94.86  | 117.5926 | 42968 | 69  | 5.39E-06 | 0 | 3.43E-07 |
| 20.7  | 17.404 | 117.6419 | 42991 | 73  | 2.12E-06 | 0 | 9.94E-07 |
| 5.5   | 100    | 117.1325 | 42769 | 67  | 7.25E-06 | 0 | 5.78E-06 |
| 7.9   | 100    | 108.957  | 39385 | 52  | 6.02E-05 | 0 | 1.47E-05 |
| 11.6  | 100    | 108.511  | 39192 | 57  | 2.09E-05 | 0 | 7.24E-05 |
| 11.2  | 34.826 | 108.485  | 39180 | 47  | 0.000192 | 0 | 0.00014  |
| 5.6   | 100    | 107.9469 | 38940 | 49  | 0.000115 | 0 | 8.35E-06 |
| 24.6  | 9      | 108.4518 | 39166 | 62  | 5.88E-06 | 0 | 5.2E-07  |
| 10.5  | 100    | 109.4624 | 39594 | 38  | 0.001557 | 0 | 9.64E-05 |
| 3.8   | 100    | 123.4707 | 45379 | 38  | 0.005836 | 0 | 0.000551 |
| 7.9   | 100    | 118.145  | 43201 | 72  | 2.43E-06 | 0 | 4.4E-06  |
| 12.4  | 100    | 120.2136 | 44009 | 39  | 0.004334 | 0 | 0.000319 |
| 7.2   | 100    | 20.2628  | 5964  | 31  | 0.03751  | 0 | 0.000958 |
| 1.5   | 100    | 24.4805  | 7328  | 35  | 0.010594 | 0 | 0.00022  |
| 8.8   | 100    | 24.492   | 7332  | 38  | 0.004955 | 0 | 0.001427 |
| 11.7  | 100    | 126.9777 | 49389 | 58  | 4.68E-05 | 0 | 1.12E-05 |
| 42    | 12.899 | 139.4454 | 51779 | 95  | 1.49E-08 | 0 | 4.08E-08 |
| 20.9  | 3.886  | 139.5182 | 51810 | 52  | 0.000251 | 0 | 0.000287 |
| 1.9   | 100    | 127.5212 | 49612 | 33  | 0.020206 | 0 | 0.000431 |
| 63.7  | 3.478  | 138.9418 | 51543 | 100 | 4.25E-09 | 0 | 1.51E-08 |
| 40    | 1.36   | 139.0159 | 51577 | 59  | 5.97E-05 | 0 | 9.63E-06 |
| 1.7   | 100    | 128.5497 | 50074 | 51  | 0.000368 | 0 | 5.23E-06 |
| 17    | 100    | 128.039  | 49842 | 54  | 0.000194 | 0 | 5.19E-09 |
| 90.2  | 76.897 | 139.9682 | 52011 | 100 | 4.69E-09 | 0 | 4.83E-09 |
| 10.5  | 43.791 | 140.0303 | 52040 | 54  | 0.00016  | 0 | 0.000185 |
| 104.7 | 100    | 140.303  | 55109 | 105 | 1.13E-09 | 0 | 5.41E-06 |
| 6.9   | 100    | 131.1077 | 51116 | 50  | 0.000466 | 0 | 4.7E-05  |
| 162.7 | 7.636  | 138.1902 | 51204 | 71  | 3.21E-06 | 0 | 3.51E-06 |

|       |        |          |       |    |          |   |          |
|-------|--------|----------|-------|----|----------|---|----------|
| 93.2  | 2.325  | 138.4325 | 51307 | 72 | 3E-06    | 0 | 2.07E-06 |
| 58.9  | 0.604  | 138.5006 | 51340 | 67 | 8.26E-06 | 0 | 1.12E-05 |
| 9.7   | 100    | 94.6473  | 35681 | 67 | 3.32E-06 | 0 | 7.95E-05 |
| 9.7   | 100    | 94.6473  | 35681 | 67 | 3.32E-06 | 0 | 0.000126 |
| 23.3  | 100    | 111.1646 | 42708 | 86 | 1.03E-07 | 0 | 1.43E-09 |
| 20.4  | 100    | 116.2197 | 44880 | 91 | 2.02E-08 | 0 | 3.68E-08 |
| 63.4  | 1.55   | 115.7232 | 44657 | 63 | 1.34E-05 | 0 | 4.62E-05 |
| 90.2  | 2.051  | 115.7153 | 44653 | 90 | 3E-08    | 0 | 3.58E-07 |
| 61.9  | 100    | 140.3746 | 52205 | 91 | 2.77E-08 | 0 | 7.34E-06 |
| 0.3   | 100    | 105.6831 | 40951 | 52 | 4.63E-05 | 0 | 0.000978 |
| 5     | 100    | 68.6014  | 25518 | 52 | 0.000115 | 0 | 0.000296 |
| 2.1   | 100    | 67.3632  | 25022 | 38 | 0.003225 | 0 | 0.001553 |
| 6.4   | 93.918 | 70.0224  | 26107 | 58 | 3.07E-05 | 0 | 0.001413 |
| 3.1   | 63.454 | 70.0185  | 26105 | 63 | 1.08E-05 | 0 | 0.000149 |
| 2.2   | 100    | 69.5152  | 25906 | 46 | 0.000465 | 0 | 0.001336 |
| 14.7  | 100    | 15.6564  | 4906  | 43 | 0.001217 | 0 | 0.001043 |
| 112.6 | 100    | 15.6456  | 4901  | 31 | 0.017906 | 0 | 0.00012  |
| 10.4  | 100    | 102.5863 | 37922 | 49 | 0.000101 | 0 | 8.28E-05 |
| 10.5  | 100    | 133.3301 | 50956 | 64 | 1.57E-05 | 0 | 1.02E-05 |
| 6.6   | 100    | 121.471  | 45896 | 44 | 0.001717 | 0 | 0.000612 |
| 10.3  | 22.912 | 123.7834 | 46898 | 67 | 6.6E-06  | 0 | 0.000173 |
| 64    | 100    | 50.642   | 17824 | 30 | 0.050068 | 0 | 0.00023  |
| 7     | 100    | 126.1957 | 47931 | 59 | 4.67E-05 | 0 | 4.54E-05 |
| 19.4  | 68.69  | 125.4726 | 47615 | 57 | 8.9E-05  | 0 | 3.04E-05 |
| 48.8  | 0.925  | 124.9695 | 47397 | 73 | 2.2E-06  | 0 | 7.64E-07 |
| 45.6  | 16.082 | 124.2781 | 47119 | 77 | 4.95E-07 | 0 | 1.99E-06 |
| 65.2  | 0.767  | 124.4629 | 47192 | 57 | 8.52E-05 | 0 | 6.28E-06 |
| 63.2  | 0.557  | 124.6386 | 47259 | 63 | 1.28E-05 | 0 | 4.11E-05 |
| 22.4  | 100    | 124.8499 | 47347 | 60 | 3.8E-05  | 0 | 2.94E-05 |
| 156.7 | 2.411  | 124.6895 | 47280 | 92 | 2.62E-08 | 0 | 8.07E-09 |
| 59.7  | 1.051  | 124.782  | 47316 | 65 | 9.43E-06 | 0 | 2.77E-05 |
| 28.8  | 8.234  | 125.1442 | 47480 | 50 | 0.00024  | 0 | 0.000436 |
| 8.4   | 100    | 125.1934 | 47500 | 52 | 0.000257 | 0 | 0.00038  |
| 44.8  | 100    | 125.2864 | 47537 | 65 | 8.01E-06 | 0 | 3.09E-05 |
| 55.9  | 51.549 | 51.1462  | 18024 | 55 | 0.000135 | 0 | 1.6E-05  |
| 81.3  | 53.103 | 52.2284  | 18479 | 55 | 0.000141 | 0 | 1.51E-05 |
| 28.8  | 100    | 51.9993  | 18384 | 34 | 0.01811  | 0 | 0.000651 |
| 2.3   | 100    | 126.6985 | 48137 | 36 | 0.009686 | 0 | 0.001396 |
| 12.1  | 100    | 128.0674 | 48697 | 50 | 0.000451 | 0 | 0.000134 |
| 51.1  | 48.89  | 37.4212  | 12589 | 20 | 0.2295   | 0 | 0.001164 |
| 22.1  | 100    | 52.5049  | 18601 | 36 | 0.01177  | 0 | 0.000663 |
| 44.4  | 100    | 52.9291  | 18773 | 74 | 9.76E-07 | 0 | 3.63E-05 |
| 44.4  | 100    | 52.9291  | 18773 | 74 | 9.76E-07 | 0 | 0.000104 |
| 27.9  | 100    | 72.9852  | 27021 | 31 | 0.028154 | 0 | 0.000703 |
| 2.7   | 100    | 67.9982  | 24913 | 63 | 1.06E-05 | 0 | 8.32E-05 |
| 66.3  | 40.83  | 67.8289  | 24844 | 46 | 0.000859 | 0 | 1.63E-05 |
| 9.4   | 100    | 68.7164  | 25220 | 49 | 0.000431 | 0 | 3.66E-05 |
| 0.3   | 6.932  | 66.492   | 24298 | 63 | 1.04E-05 | 0 | 9.6E-05  |
| 9.4   | 100    | 65.9833  | 24085 | 44 | 0.000684 | 0 | 0.000714 |
| 0.8   | 100    | 67.497   | 24711 | 63 | 9.9E-06  | 0 | 9.61E-05 |
| 25    | 100    | 67.3109  | 24639 | 25 | 0.094235 | 0 | 0.000164 |
| 0.5   | 23.398 | 66.9947  | 24515 | 56 | 5.07E-05 | 0 | 0.000322 |

|       |        |          |       |    |          |          |          |
|-------|--------|----------|-------|----|----------|----------|----------|
| 76.2  | 100    | 71.5608  | 26417 | 52 | 0.000217 | 0        | 5.17E-06 |
| 93.2  | 4.674  | 71.052   | 26204 | 51 | 0.000236 | 0        | 2.63E-05 |
| 28.8  | 100    | 72.0727  | 26636 | 47 | 0.000679 | 0        | 4.9E-06  |
| 80.1  | 48.934 | 69.219   | 25428 | 52 | 0.000201 | 0        | 5.49E-06 |
| 72.1  | 100    | 70.0465  | 25777 | 51 | 0.000235 | 0        | 9.45E-06 |
| 23.9  | 9.597  | 70.5745  | 26001 | 46 | 0.000912 | 0        | 0.001373 |
| 127.7 | 1.287  | 70.55    | 25989 | 50 | 0.000339 | 0        | 4.82E-05 |
| 19.6  | 100    | 44.9762  | 17571 | 37 | 0.009541 | 0        | 0.000183 |
| 59.3  | 100    | 60.1097  | 24078 | 77 | 6.12E-07 | 0        | 9.16E-06 |
| 74.7  | 100    | 60.4717  | 24249 | 34 | 0.013397 | 0        | 1.33E-05 |
| 98.2  | 3.695  | 60.9851  | 24478 | 35 | 0.011032 | 0        | 1.63E-05 |
| 35.3  | 40.367 | 63.2131  | 25437 | 44 | 0.001422 | 0        | 2.81E-06 |
| 58.1  | 40.315 | 62.7038  | 25231 | 36 | 0.008921 | 0        | 4.37E-05 |
| 8.1   | 56.703 | 64.0048  | 25778 | 66 | 7.87E-06 | 0        | 0.00041  |
| 36.6  | 100    | 63.7348  | 25667 | 37 | 0.00702  | 0        | 0.000715 |
| 29.8  | 8.987  | 61.4928  | 24705 | 44 | 0.001532 | 0        | 2.96E-06 |
| 59.2  | 54.332 | 62.2042  | 25024 | 37 | 0.00648  | 0        | 9.7E-06  |
| 72.2  | 37.323 | 54.0251  | 21502 | 55 | 0.000101 | 0        | 0.000632 |
| 31.8  | 100    | 27.5247  | 10292 | 37 | 0.005282 | 0        | 7.28E-05 |
| 62.4  | 100    | 28.0305  | 10501 | 34 | 0.009804 | 0        | 0.000137 |
| 45.6  | 100    | 29.5544  | 11116 | 25 | 0.10604  | 0        | 0.000326 |
| 324.5 | 6.969  | 26.5068  | 9893  | 32 | 0.017707 | 0        | 0.000124 |
| 138.4 | 1.005  | 27.0157  | 10093 | 34 | 0.011877 | 0        | 0.000423 |
| 47.3  | 100    | 31.2492  | 11812 | 52 | 0.000209 | 0        | 2.79E-06 |
| 24.1  | 100    | 20.4506  | 7291  | 36 | 0.012439 | 0        | 0.000132 |
| 42.3  | 82.987 | 30.1099  | 11347 | 18 | 0.509683 | 0        | 0.001559 |
| 86.7  | 73.38  | 54.8768  | 20534 | 45 | 0.000729 | 0        | 0.001382 |
| 68.5  | 100    | 23.4847  | 8599  | 29 | 0.027842 | 0        | 0.000585 |
| 113.3 | 2.049  | 74.5798  | 30340 | 49 | 0.000577 | 0        | 5.94E-05 |
| 109   | 2.584  | 74.5719  | 30336 | 64 | 1.75E-05 | 0        | 8.77E-05 |
| 151.9 | 98.548 | 25.4628  | 9464  | 30 | 0.026509 | 0        | 0.000431 |
| 13.4  | 100    | 75.0855  | 30535 | 46 | 0.001137 | 0        | 0.000372 |
| 140.2 | 0.392  | 74.0717  | 30131 | 44 | 0.001711 | 0        | 0.000172 |
| 225.7 | 0.48   | 74.0639  | 30127 | 63 | 1.99E-05 | 0        | 0.00019  |
| 47.5  | 3.961  | 31.7395  | 12027 | 77 | 6.07E-07 | 0        | 1.92E-05 |
| 14    | 100    | 71.6696  | 29087 | 46 | 0.00108  | 0        | 0.00049  |
| 93.1  | 100    | 40.8994  | 15827 | 19 | 0.463707 | 0        | 0.001061 |
| 21.8  | 100    | 72.8151  | 29591 | 50 | 0.000393 | 0        | 8.86E-05 |
| 116   | 1.177  | 31.7559  | 12034 | 51 | 0.000239 | 0        | 2.28E-05 |
| 21.6  | 86.999 | 32.2431  | 12242 | 45 | 0.001075 | 0        | 0.000973 |
| 62.3  | 16.906 | 32.2575  | 12248 | 54 | 0.000135 | 0        | 3.6E-06  |
| 88.8  | 72.33  | 19.895   | 7038  | 50 | 0.000496 | 0        | 3.79E-05 |
| 79.9  | 0.355  | 19.471   | 6837  | 49 | 0.000587 | 0        | 0.000349 |
| 50    | 1.829  | 19.5481  | 6870  | 71 | 3.62E-06 | 0        | 3.73E-06 |
| 84.5  | 0.902  | 19.3805  | 6800  | 56 | 0.000134 | 0        | 9.72E-05 |
| 65.7  | 100    | 33.9958  | 11613 | 47 | 0.000569 | 0.000141 | 0.001763 |
| 16.7  | 100    | 76.1034  | 30961 | 41 | 0.00318  | 0.000141 | 0.001586 |
| 2.7   | 100    | 136.8273 | 50711 | 36 | 0.009658 | 0.000141 | 0.001713 |
| 11.1  | 37.275 | 78.8822  | 29490 | 69 | 2.12E-06 | 0.000141 | 0.001671 |
| 14.7  | 100    | 30.5129  | 10717 | 42 | 0.001388 | 0.000141 | 0.001766 |
| 12.5  | 100    | 21.1291  | 6130  | 25 | 0.146483 | 0.000141 | 0.001721 |
| 4.1   | 100    | 78.4303  | 29074 | 32 | 0.011445 | 0.000141 | 0.001569 |

|       |        |          |       |    |          |          |          |
|-------|--------|----------|-------|----|----------|----------|----------|
| 22.6  | 100    | 50.1311  | 17609 | 33 | 0.022863 | 0.000141 | 0.001626 |
| 3.5   | 100    | 118.3796 | 48608 | 47 | 0.000544 | 0.000141 | 0.001582 |
| 152.3 | 78.496 | 37.7163  | 12706 | 22 | 0.138426 | 0.000273 | 0.00213  |
| 4.7   | 100    | 83.4601  | 34000 | 38 | 0.002063 | 0.000273 | 0.001973 |
| 8.4   | 100    | 90.7111  | 37087 | 40 | 0.004497 | 0.000273 | 0.00208  |
| 1.8   | 100    | 68.9334  | 25651 | 50 | 0.000194 | 0.000273 | 0.001838 |
| 36    | 100    | 85.3717  | 31754 | 34 | 0.005097 | 0.000273 | 0.001906 |
| 127.4 | 100    | 24.9572  | 9239  | 17 | 0.567293 | 0.000273 | 0.002066 |
| 0     | 43.975 | 67.0009  | 24518 | 49 | 0.000224 | 0.000273 | 0.002063 |
| 70    | 68.476 | 52.8859  | 21021 | 42 | 0.001625 | 0.000273 | 0.002048 |
| 70    | 68.476 | 52.8859  | 21021 | 42 | 0.001625 | 0.000273 | 0.002048 |
| 1.1   | 100    | 138.3984 | 56604 | 30 | 0.041829 | 0.000273 | 0.002037 |
| 8.2   | 100    | 75.1499  | 28199 | 31 | 0.027879 | 0.000273 | 0.001986 |
| 11.6  | 100    | 13.9115  | 3817  | 61 | 2.37E-05 | 0.000407 | 0.002143 |
| 30.3  | 100    | 15.9124  | 4492  | 45 | 0.000748 | 0.000525 | 0.002561 |
| 4.9   | 100    | 48.3995  | 15615 | 18 | 0.701698 | 0.000525 | 0.002362 |
| 19.5  | 100    | 13.9274  | 3890  | 66 | 6.88E-06 | 0.000525 | 0.002272 |
| 181.5 | 1.632  | 83.0015  | 33800 | 46 | 0.000384 | 0.000525 | 0.002183 |
| 22.7  | 30.832 | 37.1618  | 14298 | 38 | 0.004657 | 0.000525 | 0.002324 |
| 0.7   | 100    | 95.5695  | 39172 | 46 | 0.000774 | 0.000525 | 0.002639 |
| 208.8 | 0.243  | 53.521   | 21290 | 51 | 0.000292 | 0.000525 | 0.002265 |
| 28    | 100    | 29.1985  | 10979 | 37 | 0.003779 | 0.000525 | 0.002333 |
| 28.6  | 100    | 29.3602  | 9789  | 36 | 0.00522  | 0.000525 | 0.002496 |
| 40    | 100    | 40.399   | 15626 | 20 | 0.373695 | 0.00065  | 0.002718 |
| 20.5  | 100    | 33.2791  | 12661 | 23 | 0.171723 | 0.00065  | 0.002733 |
| 1.9   | 100    | 138.9011 | 56793 | 33 | 0.022882 | 0.000758 | 0.002854 |
| 95.9  | 2.538  | 55.8896  | 20892 | 51 | 0.000184 | 0.000758 | 0.003234 |
| 7.1   | 100    | 136.4133 | 52283 | 33 | 0.020335 | 0.000758 | 0.003203 |
| 19    | 100    | 75.5899  | 30747 | 37 | 0.008943 | 0.000758 | 0.003032 |
| 47    | 100    | 32.9543  | 11377 | 47 | 0.000502 | 0.000758 | 0.003052 |
| 3.4   | 100    | 123.9699 | 45567 | 35 | 0.012772 | 0.000758 | 0.002935 |
| 13.4  | 100    | 55.5736  | 18386 | 20 | 0.484428 | 0.000758 | 0.003127 |
| 1.8   | 100    | 122.2576 | 50232 | 28 | 0.067048 | 0.000868 | 0.003584 |
| 182.5 | 0.597  | 82.8252  | 33733 | 40 | 0.001165 | 0.000868 | 0.003511 |
| 23.2  | 100    | 69.747   | 28251 | 30 | 0.036569 | 0.000868 | 0.003299 |
| 33.4  | 100    | 24.3245  | 8965  | 24 | 0.164797 | 0.000951 | 0.004317 |
| 75.6  | 3.052  | 54.3719  | 20361 | 51 | 0.000181 | 0.000951 | 0.004126 |
| 35.6  | 100    | 83.8346  | 34153 | 27 | 0.0272   | 0.000951 | 0.004098 |
| 40.3  | 100    | 29.1698  | 10967 | 19 | 0.346398 | 0.000951 | 0.004535 |
| 36.2  | 100    | 38.4357  | 12988 | 22 | 0.110263 | 0.000951 | 0.004345 |
| 4     | 100    | 90.205   | 36886 | 37 | 0.008058 | 0.000951 | 0.004245 |
| 106   | 1.512  | 56.3961  | 21087 | 51 | 0.000181 | 0.000951 | 0.004099 |
| 42.8  | 100    | 56.9029  | 21319 | 43 | 0.00129  | 0.000951 | 0.003904 |
| 18.4  | 100    | 72.6464  | 25283 | 41 | 0.002955 | 0.000951 | 0.003946 |
| 3.4   | 100    | 116.2282 | 44884 | 37 | 0.005873 | 0.000951 | 0.003924 |
| 0     | 100    | 67.5078  | 24715 | 38 | 0.002899 | 0.000951 | 0.004078 |
| 23.7  | 51.223 | 71.0859  | 26220 | 32 | 0.018846 | 0.001022 | 0.005073 |
| 84.9  | 100    | 74.3435  | 27554 | 27 | 0.092033 | 0.001022 | 0.004694 |
| 58.4  | 100    | 15.9917  | 4589  | 45 | 0.000891 | 0.001022 | 0.004771 |
| 13.4  | 100    | 67.1635  | 24586 | 25 | 0.103246 | 0.001022 | 0.005303 |
| 98.5  | 100    | 55.4634  | 22117 | 46 | 0.000875 | 0.001022 | 0.005551 |
| 24.1  | 100    | 53.8707  | 20180 | 41 | 0.00201  | 0.001022 | 0.004773 |

|       |        |          |       |    |          |          |          |
|-------|--------|----------|-------|----|----------|----------|----------|
| 28.8  | 62.677 | 12.975   | 3476  | 54 | 0.000104 | 0.001022 | 0.005614 |
| 112.6 | 100    | 40.2072  | 13665 | 24 | 0.094057 | 0.001022 | 0.005546 |
| 0     | 100    | 105.4475 | 43296 | 43 | 0.001668 | 0.001022 | 0.004982 |
| 17.7  | 100    | 28.8699  | 8731  | 27 | 0.076453 | 0.001022 | 0.005027 |
| 16.7  | 100    | 25.816   | 7757  | 24 | 0.165137 | 0.001022 | 0.004917 |
| 70.2  | 100    | 17.1752  | 5376  | 42 | 0.00159  | 0.001022 | 0.004647 |
| 0.8   | 100    | 111.9015 | 45968 | 25 | 0.136714 | 0.001022 | 0.005827 |
| 0.3   | 100    | 127.6105 | 46962 | 28 | 0.043389 | 0.001114 | 0.0063   |
| 2.6   | 100    | 130.8302 | 48242 | 25 | 0.127637 | 0.001114 | 0.006234 |
| 0.3   | 100    | 132.4063 | 49137 | 31 | 0.031126 | 0.001114 | 0.006135 |
| 13.5  | 100    | 57.4036  | 21544 | 40 | 0.00245  | 0.001114 | 0.006269 |
| 0     | 15.099 | 66.4928  | 24299 | 46 | 0.000418 | 0.001114 | 0.006138 |
| 2.3   | 100    | 127.0922 | 46774 | 22 | 0.241026 | 0.00121  | 0.006837 |
| 62.6  | 100    | 30.2886  | 11422 | 50 | 0.000423 | 0.00121  | 0.006545 |
| 2.4   | 100    | 69.5629  | 25573 | 31 | 0.013992 | 0.00121  | 0.00673  |
| 9.2   | 100    | 32.7651  | 12452 | 35 | 0.011668 | 0.00121  | 0.006841 |
| 0     | 100    | 76.2771  | 28283 | 30 | 0.009897 | 0.00121  | 0.00652  |
| 0     | 100    | 29.9127  | 9064  | 37 | 0.003707 | 0.00121  | 0.006824 |
| 16.5  | 100    | 84.3454  | 34367 | 33 | 0.00723  | 0.00121  | 0.006577 |
| 44    | 100    | 23.1395  | 7887  | 15 | 1.243914 | 0.001308 | 0.007036 |
| 21.9  | 56.325 | 60.9987  | 24485 | 43 | 0.001594 | 0.001308 | 0.006943 |
| 194.4 | 100    | 16.4749  | 5321  | 50 | 0.000437 | 0.001308 | 0.007124 |
| 31.4  | 100    | 27.4083  | 8778  | 30 | 0.029952 | 0.001308 | 0.007055 |
| 15.4  | 100    | 78.3734  | 29267 | 49 | 0.000192 | 0.001308 | 0.006998 |
| 36.6  | 100    | 88.0547  | 32988 | 26 | 0.10761  | 0.001308 | 0.006923 |
| 56    | 100    | 16.4542  | 4776  | 39 | 0.004578 | 0.00141  | 0.00735  |
| 47.9  | 100    | 60.9369  | 21963 | 16 | 0.840045 | 0.001498 | 0.007774 |
| 14    | 71.027 | 56.1211  | 20031 | 58 | 2.57E-05 | 0.001498 | 0.007955 |
| 0     | 100    | 82.0927  | 30847 | 49 | 5.05E-05 | 0.001498 | 0.007636 |
| 2.2   | 100    | 124.3418 | 47148 | 29 | 0.046566 | 0.001498 | 0.007569 |
| 12.9  | 100    | 140.5497 | 52296 | 27 | 0.079584 | 0.001498 | 0.007526 |
| 56.7  | 100    | 38.377   | 11941 | 19 | 0.413862 | 0.001498 | 0.007605 |
| 3.1   | 100    | 121.055  | 49743 | 20 | 0.434992 | 0.001498 | 0.00783  |
| 2     | 100    | 68.5083  | 25136 | 36 | 0.004464 | 0.001498 | 0.007491 |
| 18.3  | 100    | 15.7791  | 4442  | 31 | 0.027968 | 0.001498 | 0.007805 |
| 2.6   | 100    | 112.0083 | 42038 | 32 | 0.031728 | 0.001576 | 0.008237 |
| 52.6  | 100    | 26.8902  | 8864  | 25 | 0.082398 | 0.001576 | 0.008722 |
| 34.8  | 12.966 | 95.0611  | 36449 | 44 | 0.000463 | 0.001576 | 0.008439 |
| 7.8   | 100    | 133.4913 | 49534 | 34 | 0.018911 | 0.001576 | 0.008708 |
| 3.3   | 100    | 128.5841 | 48935 | 28 | 0.068117 | 0.001576 | 0.008764 |
| 59.4  | 100    | 14.5345  | 4325  | 55 | 6.24E-05 | 0.001576 | 0.00877  |
| 0.4   | 100    | 30.5687  | 9310  | 40 | 0.001942 | 0.001576 | 0.008262 |
| 147.6 | 100    | 39.7039  | 13470 | 24 | 0.095211 | 0.001576 | 0.008753 |
| 87.8  | 13.168 | 19.506   | 6852  | 20 | 0.490573 | 0.001677 | 0.008942 |
| 77.8  | 100    | 19.0181  | 6627  | 28 | 0.050919 | 0.001677 | 0.008961 |
| 4.3   | 100    | 14.0875  | 3812  | 54 | 0.000136 | 0.001677 | 0.008949 |
| 19.8  | 100    | 82.4467  | 33582 | 29 | 0.017039 | 0.001758 | 0.009426 |
| 14.5  | 100    | 64.2394  | 25875 | 32 | 0.021358 | 0.001758 | 0.009507 |
| 3     | 100    | 93.4341  | 34927 | 31 | 0.038061 | 0.001758 | 0.00905  |
| 179.4 | 100    | 16.995   | 5587  | 42 | 0.001757 | 0.001758 | 0.009405 |
| 5.1   | 100    | 135.437  | 50230 | 24 | 0.164582 | 0.001758 | 0.009105 |
| 0.5   | 100    | 112.0274 | 42045 | 36 | 0.010157 | 0.001854 | 0.009693 |

|       |        |          |       |    |          |          |          |
|-------|--------|----------|-------|----|----------|----------|----------|
| 15.3  | 100    | 68.7437  | 27818 | 28 | 0.065629 | 0.001854 | 0.009731 |
| 305.6 | 51.741 | 17.1672  | 5372  | 28 | 0.040387 | 0.001854 | 0.009747 |
| 12.5  | 100    | 75.0752  | 30530 | 30 | 0.039125 | 0.001854 | 0.009721 |
| 254.2 | 84.875 | 38.1971  | 12892 | 26 | 0.067335 | 0.001945 | 0.01014  |
| 15.1  | 100    | 35.2797  | 13505 | 26 | 0.074396 | 0.001945 | 0.01007  |
| 18.5  | 100    | 33.3218  | 11018 | 37 | 0.005466 | 0.002012 | 0.01083  |
| 102   | 100    | 17.0928  | 4907  | 21 | 0.183268 | 0.002012 | 0.01077  |
| 64.8  | 100    | 17.1446  | 4794  | 24 | 0.106764 | 0.002012 | 0.01033  |
| 5     | 100    | 106.3489 | 38260 | 32 | 0.024641 | 0.002079 | 0.01168  |
| 2     | 100    | 136.3252 | 50533 | 34 | 0.013176 | 0.002257 | 0.01294  |
| 1.5   | 100    | 114.42   | 41628 | 24 | 0.142937 | 0.002257 | 0.0127   |
| 12.8  | 100    | 87.9739  | 30928 | 32 | 0.024721 | 0.002257 | 0.01256  |
| 13.3  | 100    | 23.747   | 7404  | 53 | 0.000163 | 0.002315 | 0.01364  |
| 54.8  | 100    | 17.4582  | 5219  | 40 | 0.004042 | 0.002315 | 0.01403  |
| 1.8   | 100    | 111.13   | 40271 | 21 | 0.293863 | 0.002315 | 0.01408  |
| 11.8  | 100    | 121.0628 | 45710 | 30 | 0.036395 | 0.002315 | 0.01307  |
| 20.5  | 100    | 73.107   | 26877 | 30 | 0.040995 | 0.002315 | 0.01321  |
| 7.1   | 100    | 111.6193 | 42912 | 36 | 0.009619 | 0.002376 | 0.01512  |
| 3.6   | 100    | 115.3193 | 44475 | 32 | 0.024269 | 0.002376 | 0.01527  |
| 43.4  | 100    | 80.656   | 30250 | 23 | 0.148646 | 0.002376 | 0.01534  |
| 0.4   | 100    | 121.4495 | 44539 | 22 | 0.252489 | 0.002543 | 0.01585  |
| 81.2  | 100    | 42.7692  | 14651 | 17 | 0.566023 | 0.002543 | 0.01576  |
| 58.1  | 100    | 66.4213  | 26799 | 24 | 0.156032 | 0.002719 | 0.01671  |
| 148   | 37.844 | 33.4958  | 11420 | 34 | 0.009397 | 0.002719 | 0.01674  |
| 2.2   | 100    | 132.9378 | 51913 | 36 | 0.009652 | 0.002719 | 0.01667  |
| 105.5 | 100    | 16.0405  | 4834  | 42 | 0.00147  | 0.002777 | 0.01711  |
| 6.3   | 100    | 23.9876  | 7161  | 37 | 0.006754 | 0.002777 | 0.01723  |
| 46.5  | 100    | 25.8627  | 8923  | 21 | 0.178615 | 0.002777 | 0.0172   |
| 41.9  | 100    | 21.1631  | 6778  | 52 | 4.71E-05 | 0.002777 | 0.01807  |
| 7.9   | 100    | 116.6263 | 42562 | 19 | 0.487802 | 0.002777 | 0.01819  |
| 86.4  | 7.287  | 55.3817  | 20706 | 45 | 0.000719 | 0.002777 | 0.01806  |
| 3.9   | 100    | 124.9764 | 45966 | 36 | 0.00862  | 0.002777 | 0.01774  |
| 37.4  | 100    | 37.2167  | 12514 | 10 | 2.501189 | 0.002843 | 0.01926  |
| 9.6   | 100    | 70.2487  | 25862 | 22 | 0.125026 | 0.00302  | 0.01962  |
| 1.3   | 100    | 81.4493  | 30576 | 24 | 0.072657 | 0.003096 | 0.02015  |
| 25.6  | 100    | 23.207   | 6903  | 14 | 1.551638 | 0.003096 | 0.01984  |
| 6.1   | 100    | 133.6932 | 54865 | 27 | 0.081625 | 0.003096 | 0.02007  |
| 0.4   | 100    | 130.8418 | 53661 | 26 | 0.0976   | 0.003096 | 0.01997  |
| 9.4   | 100    | 88.3908  | 32975 | 25 | 0.138828 | 0.003178 | 0.02041  |
| 31    | 100    | 17.0587  | 5041  | 37 | 0.00512  | 0.003178 | 0.02073  |
| 3.6   | 100    | 92.495   | 37853 | 24 | 0.163954 | 0.003254 | 0.02087  |
| 19.7  | 100    | 30.083   | 11335 | 19 | 0.271592 | 0.003254 | 0.02099  |
| 2.3   | 100    | 43.8659  | 16177 | 52 | 4.12E-05 | 0.003254 | 0.02115  |
| 8.3   | 100    | 73.6086  | 27094 | 29 | 0.050019 | 0.003254 | 0.02085  |
| 18.5  | 100    | 17.175   | 4808  | 36 | 0.005927 | 0.00337  | 0.02269  |
| 47    | 20.088 | 39.1893  | 13271 | 42 | 0.001688 | 0.00337  | 0.02416  |
| 14.7  | 100    | 57.3874  | 19113 | 28 | 0.057666 | 0.00337  | 0.02357  |
| 8.9   | 100    | 123.282  | 46689 | 28 | 0.050053 | 0.00337  | 0.0216   |
| 14.3  | 100    | 15.3395  | 4287  | 29 | 0.042133 | 0.00337  | 0.02372  |
| 14.3  | 100    | 15.3395  | 4287  | 29 | 0.042133 | 0.00337  | 0.02372  |
| 117.6 | 100    | 54.9593  | 21911 | 36 | 0.009313 | 0.003533 | 0.02456  |
| 66.8  | 100    | 40.3947  | 15624 | 33 | 0.019584 | 0.003533 | 0.02476  |

|       |        |          |       |    |          |          |         |
|-------|--------|----------|-------|----|----------|----------|---------|
| 17.4  | 100    | 35.8998  | 11994 | 38 | 0.005999 | 0.003674 | 0.02607 |
| 2.6   | 100    | 104.7884 | 37600 | 40 | 0.001645 | 0.003674 | 0.02628 |
| 2.6   | 100    | 104.7884 | 37600 | 40 | 0.001645 | 0.003674 | 0.02628 |
| 7.5   | 100    | 13.8681  | 3783  | 48 | 0.000476 | 0.003674 | 0.02561 |
| 73.8  | 100    | 50.3609  | 17708 | 8  | 4.818554 | 0.003674 | 0.02529 |
| 0.7   | 100    | 89.541   | 34098 | 25 | 0.064868 | 0.003674 | 0.02569 |
| 10.9  | 100    | 74.6938  | 30385 | 23 | 0.228106 | 0.003736 | 0.02688 |
| 2.1   | 100    | 126.1517 | 47912 | 19 | 0.366645 | 0.003736 | 0.02693 |
| 0     | 100    | 30.9504  | 10884 | 31 | 0.01526  | 0.003736 | 0.02681 |
| 9     | 100    | 73.1149  | 26881 | 29 | 0.056444 | 0.003892 | 0.02803 |
| 1.6   | 100    | 137.9962 | 51111 | 23 | 0.241508 | 0.003892 | 0.02804 |
| 18.4  | 100    | 53.1825  | 21151 | 23 | 0.195042 | 0.003892 | 0.02847 |
| 18.4  | 100    | 53.1825  | 21151 | 23 | 0.195042 | 0.003892 | 0.02847 |
| 11.9  | 70.77  | 133.2284 | 49147 | 30 | 0.036276 | 0.003892 | 0.02828 |
| 304.5 | 7.47   | 17.0224  | 5601  | 25 | 0.08377  | 0.003892 | 0.02856 |
| 11.8  | 100    | 89.2041  | 31437 | 18 | 0.617439 | 0.004124 | 0.02941 |
| 19.7  | 100    | 16.4186  | 4539  | 13 | 1.070135 | 0.004192 | 0.03066 |
| 2.1   | 100    | 114.8734 | 41810 | 20 | 0.246744 | 0.004266 | 0.03093 |
| 7.3   | 100    | 125.4358 | 46751 | 23 | 0.208472 | 0.004266 | 0.0309  |
| 19.8  | 100    | 16.5671  | 4589  | 37 | 0.007027 | 0.004504 | 0.03202 |
| 5     | 100    | 93.3874  | 34908 | 18 | 0.714239 | 0.004643 | 0.03367 |
| 222   | 4.769  | 39.1984  | 13275 | 24 | 0.090747 | 0.004643 | 0.03332 |
| 0.8   | 100    | 113.8013 | 42560 | 26 | 0.081667 | 0.005196 | 0.03564 |
| 4.8   | 100    | 15.806   | 4452  | 37 | 0.007344 | 0.005325 | 0.03659 |
| 1.2   | 100    | 62.5043  | 21129 | 36 | 0.008247 | 0.005325 | 0.03694 |
| 0.4   | 100    | 111.8856 | 45962 | 25 | 0.13328  | 0.005325 | 0.03657 |
| 35.3  | 100    | 137.7012 | 52844 | 28 | 0.059141 | 0.005325 | 0.03682 |
| 106.3 | 100    | 15.9414  | 4567  | 4  | 8.82411  | 0.005478 | 0.03769 |
| 28.8  | 100    | 33.4644  | 11583 | 29 | 0.032946 | 0.005478 | 0.03801 |
| 24.1  | 100    | 61.3326  | 24634 | 24 | 0.17571  | 0.005618 | 0.03832 |
| 134.3 | 100    | 17.0321  | 5029  | 17 | 0.55149  | 0.00573  | 0.03991 |
| 6.1   | 100    | 71.0914  | 26040 | 23 | 0.201121 | 0.00573  | 0.04124 |
| 85.5  | 1.849  | 38.6873  | 13076 | 42 | 0.001525 | 0.005792 | 0.04162 |
| 3.6   | 100    | 120.6758 | 44203 | 23 | 0.218849 | 0.005792 | 0.04178 |
| 2.4   | 100    | 74.3139  | 27367 | 19 | 0.515599 | 0.00599  | 0.04379 |
| 16.8  | 100    | 47.9327  | 15430 | 9  | 6.54044  | 0.00599  | 0.0444  |
| 19    | 100    | 37.9292  | 12788 | 28 | 0.033124 | 0.00599  | 0.04498 |
| 5.5   | 100    | 93.5553  | 35792 | 42 | 0.001063 | 0.006222 | 0.04603 |
| 19.8  | 100    | 67.5508  | 24884 | 20 | 0.329074 | 0.006299 | 0.04617 |
| 8.1   | 100    | 75.5794  | 30742 | 24 | 0.161515 | 0.006497 | 0.04824 |
| 1.5   | 100    | 125.9593 | 48977 | 17 | 0.872758 | 0.006926 | 0.04995 |
| 15.3  | 100    | 23.999   | 7165  | 32 | 0.017557 | 0.006926 | 0.05081 |
| 15.3  | 100    | 23.999   | 7165  | 32 | 0.017557 | 0.006926 | 0.05081 |
| 58.2  | 48.257 | 23.3448  | 7424  | 51 | 0.000227 | 0.00728  | 0.05292 |
| 100.6 | 72.127 | 13.9328  | 4030  | 54 | 0.000109 | 0.00728  | 0.05297 |
| 0     | 100    | 127.7537 | 47012 | 32 | 0.019556 | 0.007903 | 0.05735 |
| 0     | 100    | 30.4458  | 10689 | 28 | 0.030712 | 0.007969 | 0.05798 |
| 9     | 100    | 36.1129  | 13859 | 40 | 0.002641 | 0.00822  | 0.06054 |
| 0     | 100    | 113.112  | 46451 | 24 | 0.106388 | 0.00822  | 0.06109 |
| 8.1   | 100    | 73.6164  | 27097 | 27 | 0.087429 | 0.0085   | 0.06357 |
| 2     | 100    | 81.3215  | 30528 | 27 | 0.036275 | 0.008746 | 0.06627 |
| 64.4  | 100    | 42.4544  | 14527 | 18 | 0.587316 | 0.008746 | 0.06648 |

|      |        |          |       |     |          |          |          |
|------|--------|----------|-------|-----|----------|----------|----------|
| 7.1  | 100    | 88.2017  | 36070 | 23  | 0.211515 | 0.008997 | 0.06829  |
| 38.1 | 100    | 31.4731  | 11915 | 14  | 1.208199 | 0.008997 | 0.06916  |
| 0.4  | 100    | 127.298  | 48387 | 18  | 0.654407 | 0.008997 | 0.06951  |
| 3.2  | 100    | 79.7956  | 29607 | 8   | 2.488017 | 0.008997 | 0.06812  |
| 18.8 | 100    | 29.9659  | 10032 | 31  | 0.022369 | 0.008997 | 0.069    |
| 1.8  | 100    | 132.7205 | 48945 | 26  | 0.086057 | 0.009514 | 0.07383  |
| 3.4  | 100    | 69.5188  | 25908 | 23  | 0.08999  | 0.009514 | 0.07644  |
| 5.9  | 100    | 54.9751  | 21919 | 15  | 0.326778 | 0.00971  | 0.07714  |
| 0.4  | 100    | 29.3541  | 9787  | 23  | 0.096391 | 0.009764 | 0.07808  |
| 58   | 47.488 | 26.4598  | 8400  | 50  | 0.000214 | 0.009858 | 0.08179  |
| 5.9  | 100    | 79.2935  | 29414 | 2   | 10.21345 | 0.009914 | 0.08254  |
| 32.4 | 100    | 49.1139  | 15909 | 36  | 0.008302 | 0        | 0.000296 |
| 27.6 | 100    | 49.0176  | 15870 | 31  | 0.018429 | 0        | 0.000345 |
| 13.4 | 100    | 48.5145  | 15661 | 37  | 0.00475  | 0        | 0.0011   |
| 51   | 100    | 48.6073  | 15702 | 37  | 0.006753 | 0        | 0.000475 |
| 8.7  | 100    | 56.3321  | 18685 | 47  | 0.000593 | 0        | 0.001131 |
| 49.4 | 100    | 56.5855  | 18783 | 39  | 0.004003 | 0        | 0.000561 |
| 75.1 | 100    | 69.3065  | 25606 | 45  | 0.001098 | 0        | 6.69E-05 |
| 26.5 | 100    | 37.6156  | 11671 | 34  | 0.011079 | 0        | 0.000595 |
| 10.7 | 100    | 31.7088  | 9650  | 27  | 0.056312 | 0        | 0.000974 |
| 59.9 | 100    | 46.1372  | 16068 | 46  | 0.00058  | 0        | 1.56E-05 |
| 1.8  | 100    | 109.1968 | 41005 | 30  | 0.013125 | 0        | 0.000104 |
| 1.2  | 100    | 108.6934 | 40827 | 63  | 6.38E-06 | 0        | 1.69E-06 |
| 0.4  | 100    | 117.0383 | 43795 | 30  | 0.008703 | 0        | 0.00051  |
| 2.4  | 100    | 116.956  | 43766 | 71  | 7.01E-07 | 0        | 4.03E-07 |
| 17.7 | 100    | 16.4872  | 4792  | 49  | 0.000314 | 0        | 0.000453 |
| 0    | 100    | 118.3708 | 48604 | 33  | 0.004566 | 0        | 0.001506 |
| 2.5  | 100    | 118.3068 | 48575 | 64  | 3.56E-06 | 0        | 5.05E-07 |
| 5.7  | 100    | 117.8037 | 48371 | 81  | 6.8E-08  | 0        | 1.58E-09 |
| 2    | 100    | 117.4634 | 48223 | 71  | 4.84E-07 | 0        | 1.52E-06 |
| 1.9  | 100    | 117.3602 | 48178 | 42  | 0.00061  | 0        | 2.55E-05 |
| 13.4 | 100    | 117.301  | 48152 | 133 | 4.03E-13 | 0        | 4.79E-14 |
| 7.5  | 99.876 | 116.8571 | 47970 | 103 | 4.47E-10 | 0        | 8.8E-10  |
| 17.9 | 37.004 | 116.7965 | 47943 | 108 | 1.21E-10 | 0        | 3.42E-12 |
| 8.7  | 100    | 116.3538 | 47752 | 103 | 4.98E-10 | 0        | 2.62E-11 |
| 5.6  | 100    | 119.8167 | 49221 | 85  | 2.95E-08 | 0        | 6.64E-10 |
| 0.8  | 100    | 119.6369 | 49149 | 31  | 0.011734 | 0        | 0.000873 |
| 2.9  | 100    | 119.3162 | 49021 | 64  | 3.45E-06 | 0        | 2.92E-07 |
| 9.9  | 100    | 116.2902 | 47723 | 99  | 1.26E-09 | 0        | 1.11E-10 |
| 0    | 100    | 109.199  | 44844 | 44  | 0.000297 | 0        | 7.35E-05 |
| 0    | 100    | 108.6955 | 44653 | 87  | 1.4E-08  | 0        | 4.55E-09 |
| 0    | 100    | 108.192  | 44457 | 83  | 3.75E-08 | 0        | 2.7E-08  |
| 0    | 100    | 107.6861 | 44253 | 80  | 6.77E-08 | 0        | 2.86E-08 |
| 14.5 | 100    | 107.2193 | 44066 | 53  | 6.02E-05 | 0        | 3.01E-07 |
| 0.8  | 100    | 107.1825 | 44049 | 70  | 6.77E-07 | 0        | 1.87E-06 |
| 9.1  | 16.328 | 107.084  | 44004 | 72  | 7.21E-07 | 0        | 3.64E-10 |
| 5.4  | 100    | 106.7159 | 43855 | 77  | 2.84E-07 | 0        | 7.69E-09 |
| 6.8  | 12.786 | 106.5783 | 43797 | 59  | 1.71E-05 | 0        | 7.36E-09 |
| 0.8  | 100    | 122.3311 | 50263 | 42  | 0.000579 | 0        | 0.000437 |
| 1.3  | 100    | 121.3249 | 49846 | 45  | 0.000234 | 0        | 9.78E-05 |
| 1.2  | 100    | 124.3456 | 51063 | 36  | 0.001981 | 0        | 0.000205 |
| 15.9 | 71.561 | 106.2142 | 43635 | 79  | 1.5E-07  | 0        | 1.52E-09 |



|       |        |          |       |     |          |   |          |
|-------|--------|----------|-------|-----|----------|---|----------|
| 11.7  | 4.87   | 106.0675 | 43573 | 73  | 7.27E-07 | 0 | 1.84E-09 |
| 0.4   | 100    | 80.1341  | 32645 | 38  | 0.001905 | 0 | 0.000572 |
| 14.3  | 100    | 80.6357  | 32844 | 61  | 1.01E-05 | 0 | 3.23E-06 |
| 2.1   | 100    | 81.1406  | 33045 | 49  | 0.000139 | 0 | 7.09E-05 |
| 3.5   | 40.456 | 105.7103 | 43409 | 62  | 7.6E-06  | 0 | 3.03E-07 |
| 13.5  | 8.576  | 105.5626 | 43343 | 79  | 1.79E-07 | 0 | 2.23E-09 |
| 1.4   | 100    | 102.0629 | 41925 | 35  | 0.003778 | 0 | 1.23E-05 |
| 76.5  | 100    | 62.9409  | 21303 | 34  | 0.01267  | 0 | 0.000412 |
| 98.6  | 100    | 59.184   | 19808 | 30  | 0.032285 | 0 | 0.001361 |
| 95.1  | 100    | 60.1903  | 20209 | 42  | 0.00215  | 0 | 0.000188 |
| 83.3  | 12.205 | 59.6868  | 19993 | 43  | 0.001691 | 0 | 0.000829 |
| 70.7  | 85.03  | 59.6993  | 19999 | 64  | 1.1E-05  | 0 | 8.02E-06 |
| 17.3  | 100    | 16.5663  | 5080  | 46  | 0.00062  | 0 | 0.000559 |
| 97.8  | 11.263 | 46.6396  | 16268 | 50  | 0.000238 | 0 | 1.58E-05 |
| 27.4  | 100    | 46.6928  | 16288 | 37  | 0.004695 | 0 | 0.001227 |
| 16.7  | 100    | 57.076   | 18860 | 41  | 0.001805 | 0 | 0.000327 |
| 32.9  | 100    | 56.7763  | 18745 | 36  | 0.007239 | 0 | 0.00015  |
| 47.7  | 100    | 56.6493  | 18698 | 30  | 0.023093 | 0 | 0.000603 |
| 56.6  | 57.342 | 56.5743  | 18671 | 41  | 0.00181  | 0 | 3.42E-05 |
| 22.4  | 100    | 57.3012  | 18945 | 30  | 0.031347 | 0 | 0.000609 |
| 49    | 25.603 | 56.0732  | 18479 | 46  | 0.00058  | 0 | 6.18E-05 |
| 46.1  | 12.099 | 55.9679  | 18435 | 39  | 0.002939 | 0 | 3.17E-05 |
| 66.1  | 37.162 | 55.7672  | 18362 | 34  | 0.011817 | 0 | 7.82E-05 |
| 94.3  | 99.621 | 56.2713  | 18550 | 33  | 0.015208 | 0 | 2.98E-05 |
| 96.8  | 100    | 55.6658  | 18326 | 37  | 0.004652 | 0 | 0.000488 |
| 18.9  | 100    | 59.7042  | 19845 | 37  | 0.007092 | 0 | 0.000154 |
| 39.3  | 100    | 50.7717  | 16465 | 63  | 1.57E-05 | 0 | 0.000514 |
| 79.1  | 11.221 | 55.4651  | 18249 | 32  | 0.014149 | 0 | 0.000518 |
| 95    | 100    | 54.9634  | 18044 | 23  | 0.127953 | 0 | 0.000968 |
| 34.7  | 100    | 65.9803  | 22255 | 40  | 0.003191 | 0 | 0.000282 |
| 133.2 | 2.403  | 66.4832  | 22451 | 47  | 0.000695 | 0 | 3.55E-05 |
| 57.3  | 38.084 | 66.5614  | 22484 | 72  | 1.96E-06 | 0 | 2.74E-05 |
| 37    | 100    | 68.0001  | 23040 | 39  | 0.003978 | 0 | 0.000273 |
| 81.2  | 100    | 67.4921  | 22847 | 36  | 0.00693  | 0 | 0.000359 |
| 27.1  | 100    | 67.064   | 22681 | 56  | 7.94E-05 | 0 | 0.000509 |
| 141.1 | 9.272  | 66.9895  | 22651 | 54  | 0.000124 | 0 | 7.21E-06 |
| 22.3  | 100    | 136.0331 | 50255 | 67  | 8.16E-06 | 0 | 1.34E-05 |
| 67.1  | 100    | 36.1376  | 11197 | 47  | 0.000433 | 0 | 2.96E-05 |
| 160.9 | 4.902  | 35.6342  | 11020 | 43  | 0.001005 | 0 | 0.000115 |
| 1.8   | 100    | 135.7535 | 50136 | 76  | 1.06E-06 | 0 | 4.96E-06 |
| 40.4  | 76.375 | 135.5295 | 50041 | 66  | 1.13E-05 | 0 | 1.26E-06 |
| 21.7  | 100    | 78.3577  | 27106 | 33  | 0.012642 | 0 | 0.000135 |
| 8.1   | 100    | 78.2756  | 27073 | 32  | 0.014095 | 0 | 0.000158 |
| 10.4  | 100    | 141.829  | 52976 | 62  | 2.29E-05 | 0 | 1.44E-06 |
| 4.4   | 100    | 141.8582 | 52989 | 44  | 0.000912 | 0 | 0.000111 |
| 73.1  | 66.205 | 53.3956  | 18943 | 36  | 0.008135 | 0 | 0.000344 |
| 1.1   | 100    | 22.9039  | 6804  | 63  | 6.48E-06 | 0 | 0.000243 |
| 85.7  | 41.477 | 65.2676  | 23717 | 46  | 0.000824 | 0 | 9.13E-05 |
| 61.3  | 6.997  | 99.7392  | 38458 | 85  | 1.22E-08 | 0 | 3.97E-10 |
| 23.8  | 63.769 | 99.7112  | 38445 | 103 | 2.36E-10 | 0 | 2.42E-11 |
| 17.3  | 100    | 99.2326  | 38229 | 86  | 1.14E-08 | 0 | 1.15E-09 |
| 3.5   | 100    | 99.7724  | 38473 | 37  | 0.000972 | 0 | 0.001048 |

|       |        |          |       |     |          |   |          |
|-------|--------|----------|-------|-----|----------|---|----------|
| 1.2   | 100    | 100.2443 | 38663 | 55  | 1.31E-05 | 0 | 8.49E-05 |
| 14.1  | 100    | 97.4565  | 37454 | 57  | 7.2E-06  | 0 | 2.38E-06 |
| 25.5  | 47.8   | 112.4534 | 41978 | 53  | 0.00022  | 0 | 2.87E-05 |
| 44.6  | 14.308 | 118.3382 | 46171 | 98  | 1.98E-09 | 0 | 8.11E-10 |
| 10    | 100    | 118.2073 | 46118 | 60  | 1.18E-05 | 0 | 2.76E-07 |
| 31.6  | 100    | 117.8325 | 45961 | 94  | 4.41E-09 | 0 | 1.21E-09 |
| 5.3   | 100    | 117.3291 | 45753 | 60  | 1.03E-05 | 0 | 7.23E-06 |
| 11.9  | 100    | 114.7421 | 44702 | 67  | 2.36E-06 | 0 | 1.55E-06 |
| 10.4  | 100    | 118.711  | 46331 | 56  | 2.88E-05 | 0 | 3.28E-06 |
| 45    | 27.057 | 118.8399 | 46384 | 85  | 3.41E-08 | 0 | 1.15E-09 |
| 8.3   | 100    | 140.4136 | 54533 | 37  | 0.002529 | 0 | 0.000261 |
| 4.4   | 100    | 139.9116 | 54338 | 54  | 5.27E-05 | 0 | 1.98E-05 |
| 3.7   | 100    | 139.2675 | 54112 | 61  | 9.3E-06  | 0 | 2.7E-06  |
| 2.5   | 100    | 138.7637 | 53935 | 46  | 0.000281 | 0 | 0.000223 |
| 1.8   | 100    | 120.854  | 47199 | 42  | 0.000807 | 0 | 0.000277 |
| 1.6   | 100    | 120.2097 | 46941 | 82  | 1.46E-08 | 0 | 3.53E-08 |
| 6.4   | 100    | 119.8476 | 46793 | 52  | 7.76E-05 | 0 | 2.25E-05 |
| 1.5   | 100    | 119.7094 | 46740 | 67  | 4.53E-07 | 0 | 2.56E-07 |
| 21.3  | 100    | 119.3442 | 46589 | 87  | 2.25E-08 | 0 | 1.12E-08 |
| 4.5   | 100    | 119.5578 | 45051 | 30  | 0.041878 | 0 | 0.00078  |
| 12.5  | 32.078 | 120.5854 | 45964 | 108 | 3.47E-11 | 0 | 6.2E-11  |
| 1.4   | 100    | 120.7159 | 46013 | 38  | 0.000344 | 0 | 0.000831 |
| 0.8   | 100    | 121.0916 | 46140 | 76  | 5.29E-08 | 0 | 1.54E-07 |
| 12.2  | 100    | 118.7121 | 44691 | 75  | 6.69E-07 | 0 | 7.67E-08 |
| 14.4  | 100    | 119.1051 | 44868 | 65  | 5.41E-06 | 0 | 4.54E-07 |
| 26.3  | 15.19  | 41.1752  | 14043 | 59  | 4.04E-05 | 0 | 0.000394 |
| 165.6 | 100    | 41.6496  | 14210 | 36  | 0.00906  | 0 | 0.000563 |
| 24.4  | 100    | 32.5844  | 10738 | 58  | 1.29E-05 | 0 | 0.001052 |
| 7.2   | 100    | 115.7572 | 43411 | 39  | 0.00179  | 0 | 0.00053  |
| 6.2   | 100    | 77.6131  | 28950 | 69  | 5.38E-07 | 0 | 5E-08    |
| 5.6   | 100    | 78.6412  | 29378 | 37  | 0.001516 | 0 | 0.000625 |
| 2.9   | 100    | 78.1182  | 29161 | 66  | 9.03E-07 | 0 | 1.19E-06 |
| 2     | 100    | 118.207  | 44459 | 49  | 0.000299 | 0 | 8.96E-05 |
| 17.9  | 42.477 | 118.6017 | 44640 | 91  | 1.69E-08 | 0 | 4.97E-10 |
| 87.3  | 100    | 70.636   | 26025 | 41  | 0.001975 | 0 | 6.34E-05 |
| 24.9  | 100    | 70.1294  | 25814 | 39  | 0.003587 | 0 | 0.00021  |
| 34    | 100    | 46.2455  | 16554 | 48  | 5.68E-05 | 0 | 9.55E-05 |
| 52    | 3.197  | 87.3198  | 31506 | 41  | 0.001915 | 0 | 1.42E-05 |
| 48.8  | 3.207  | 87.3329  | 31512 | 41  | 0.002156 | 0 | 9.73E-06 |
| 20.4  | 43.03  | 86.115   | 30989 | 68  | 5.16E-06 | 0 | 6.03E-07 |
| 30.6  | 100    | 67.9718  | 27487 | 60  | 3.27E-05 | 0 | 6.11E-05 |
| 32.6  | 100    | 68.4752  | 27707 | 61  | 2.9E-05  | 0 | 0.000322 |
| 34.5  | 100    | 86.4363  | 31134 | 44  | 0.001426 | 0 | 0.0002   |
| 34.5  | 100    | 86.4363  | 31134 | 44  | 0.001426 | 0 | 0.0002   |
| 20.4  | 43.03  | 86.115   | 30989 | 68  | 5.16E-06 | 0 | 6.03E-07 |
| 35.9  | 43.96  | 88.3261  | 31914 | 41  | 0.001893 | 0 | 8.65E-06 |
| 13.8  | 100    | 88.3465  | 31924 | 49  | 0.000344 | 0 | 5.43E-06 |
| 27.7  | 100    | 59.8878  | 22479 | 56  | 6.53E-05 | 0 | 0.000165 |
| 42.9  | 67.328 | 141.106  | 54493 | 81  | 2.38E-07 | 0 | 1.13E-09 |
| 47.6  | 3.771  | 87.8244  | 31714 | 41  | 0.001828 | 0 | 7.72E-05 |
| 30.9  | 5.745  | 87.8382  | 31720 | 45  | 0.000705 | 0 | 4.56E-06 |
| 26.4  | 100    | 141.4515 | 54703 | 67  | 7.05E-06 | 0 | 3.85E-11 |

|       |        |          |       |    |          |          |          |
|-------|--------|----------|-------|----|----------|----------|----------|
| 141.2 | 1.678  | 67.4619  | 27251 | 73 | 1.61E-06 | 0        | 0.00033  |
| 26.8  | 100    | 85.6095  | 30776 | 57 | 6.29E-05 | 0        | 2.24E-06 |
| 9.8   | 100    | 85.2057  | 30604 | 43 | 0.001201 | 0        | 0.000233 |
| 26.8  | 100    | 85.6095  | 30776 | 57 | 6.29E-05 | 0        | 2.24E-06 |
| 8.6   | 100    | 79.3204  | 29465 | 35 | 0.000311 | 0        | 0.000744 |
| 41.3  | 100    | 66.9581  | 27025 | 66 | 8.67E-06 | 0        | 6.74E-05 |
| 21.6  | 100    | 78.8174  | 29287 | 51 | 8.06E-06 | 0        | 7.92E-05 |
| 36.7  | 100    | 28.778   | 10806 | 61 | 2.68E-05 | 0        | 0.000185 |
| 117.1 | 100    | 31.532   | 11939 | 37 | 0.005208 | 0        | 0.000203 |
| 33.2  | 17.806 | 36.7423  | 14124 | 83 | 3.65E-08 | 0        | 6.26E-10 |
| 41    | 16.264 | 36.7203  | 14115 | 96 | 1.96E-09 | 0        | 1.57E-12 |
| 19    | 100    | 37.226   | 14324 | 92 | 4.96E-09 | 0        | 4.85E-11 |
| 88.9  | 7.676  | 59.3834  | 22289 | 53 | 0.000107 | 0        | 0.000776 |
| 18.7  | 81.313 | 32.02    | 12148 | 72 | 1.62E-06 | 0        | 4.17E-06 |
| 26    | 45.423 | 32.0318  | 12153 | 46 | 0.000659 | 0        | 3.31E-05 |
| 2.6   | 100    | 76.0069  | 27903 | 46 | 4.83E-06 | 0        | 0.000548 |
| 0     | 100    | 117.9661 | 48440 | 42 | 0.000306 | 0.000141 | 0.001691 |
| 48.5  | 100    | 52.885   | 18742 | 29 | 0.038848 | 0.000141 | 0.001649 |
| 54.9  | 100    | 49.1313  | 17797 | 30 | 0.022795 | 0.000141 | 0.001593 |
| 163.3 | 0.7    | 41.1454  | 14030 | 39 | 0.004854 | 0.000273 | 0.002015 |
| 5.9   | 100    | 117.6473 | 45884 | 34 | 0.001878 | 0.000273 | 0.00184  |
| 55.3  | 100    | 37.1149  | 11498 | 29 | 0.036544 | 0.000273 | 0.002053 |
| 1.6   | 100    | 120.3199 | 49433 | 31 | 0.006893 | 0.000273 | 0.00187  |
| 7.4   | 100    | 56.7512  | 18851 | 45 | 0.000993 | 0.000273 | 0.001847 |
| 66.8  | 100    | 52.1979  | 17102 | 25 | 0.092475 | 0.000407 | 0.002138 |
| 32.5  | 100    | 16.2481  | 4483  | 58 | 1.82E-05 | 0.000525 | 0.002421 |
| 66.4  | 9.609  | 45.2358  | 16148 | 44 | 0.00015  | 0.000525 | 0.002378 |
| 100.1 | 59.417 | 33.0917  | 10929 | 65 | 2.78E-06 | 0.000525 | 0.002175 |
| 7.4   | 100    | 58.9272  | 22119 | 26 | 0.058592 | 0.000525 | 0.002488 |
| 36.6  | 100    | 68.8063  | 25406 | 24 | 0.126987 | 0.000525 | 0.00245  |
| 14    | 100    | 27.7689  | 10386 | 46 | 0.000838 | 0.000525 | 0.002175 |
| 2.3   | 100    | 122.8352 | 50465 | 21 | 0.069091 | 0.000525 | 0.002424 |
| 12.7  | 100    | 19.2699  | 5991  | 57 | 6.31E-05 | 0.000525 | 0.002441 |
| 24.9  | 100    | 18.2226  | 5884  | 52 | 2.55E-05 | 0.00065  | 0.002719 |
| 7.9   | 100    | 60.1215  | 20176 | 43 | 0.001906 | 0.000758 | 0.003145 |
| 3.2   | 100    | 119.0417 | 44841 | 20 | 0.479712 | 0.000758 | 0.002902 |
| 2.8   | 100    | 120.0085 | 49305 | 25 | 0.028052 | 0.000758 | 0.003062 |
| 0.8   | 100    | 124.8514 | 51265 | 23 | 0.035587 | 0.000758 | 0.00279  |
| 27    | 41.557 | 59.4349  | 22311 | 34 | 0.009286 | 0.000758 | 0.002885 |
| 72.1  | 100    | 17.2004  | 4817  | 29 | 0.041228 | 0.000758 | 0.002894 |
| 4.4   | 100    | 19.2393  | 5645  | 57 | 5.41E-05 | 0.000758 | 0.002982 |
| 11.3  | 100    | 22.9017  | 6803  | 40 | 0.001579 | 0.000758 | 0.002802 |
| 109.7 | 1.915  | 28.2739  | 10600 | 54 | 0.000151 | 0.000868 | 0.003488 |
| 214.6 | 67.64  | 55.2661  | 18169 | 16 | 0.770025 | 0.000868 | 0.003521 |
| 129.8 | 100    | 34.1353  | 11327 | 65 | 3.89E-06 | 0.000868 | 0.003275 |
| 1.4   | 100    | 116.8291 | 45553 | 25 | 0.037943 | 0.000951 | 0.00367  |
| 5.5   | 100    | 19.3985  | 5566  | 58 | 5.23E-05 | 0.000951 | 0.003748 |
| 79.1  | 5.751  | 45.7415  | 16364 | 45 | 0.000136 | 0.000951 | 0.003903 |
| 97.2  | 7.457  | 44.7307  | 15956 | 45 | 0.000139 | 0.000951 | 0.003849 |
| 10.7  | 100    | 56.2426  | 18646 | 46 | 0.00083  | 0.000951 | 0.004058 |
| 9.6   | 100    | 32.5433  | 12361 | 32 | 0.01747  | 0.000951 | 0.003869 |
| 30.7  | 100    | 57.4489  | 19004 | 39 | 0.003788 | 0.000951 | 0.003953 |

|       |        |          |       |    |          |          |          |
|-------|--------|----------|-------|----|----------|----------|----------|
| 9.8   | 100    | 62.1268  | 22440 | 44 | 0.001193 | 0.000951 | 0.004246 |
| 272.6 | 84.83  | 18.3325  | 6292  | 15 | 0.487925 | 0.000951 | 0.004192 |
| 55.7  | 100    | 34.2642  | 10510 | 29 | 0.021874 | 0.000951 | 0.004249 |
| 137.5 | 100    | 30.7784  | 10063 | 53 | 4.08E-05 | 0.001022 | 0.004934 |
| 15.3  | 100    | 55.7324  | 18452 | 39 | 0.003723 | 0.001022 | 0.005823 |
| 64.4  | 100    | 33.6315  | 11134 | 48 | 0.000131 | 0.001022 | 0.004687 |
| 79    | 100    | 42.6995  | 14621 | 22 | 0.198831 | 0.001022 | 0.005227 |
| 18.1  | 100    | 62.6295  | 22658 | 45 | 0.001055 | 0.001022 | 0.005724 |
| 183.2 | 100    | 40.6427  | 13837 | 23 | 0.163472 | 0.001022 | 0.00555  |
| 1.4   | 100    | 118.8121 | 48806 | 27 | 0.01888  | 0.001022 | 0.005056 |
| 38.8  | 100    | 46.2718  | 18155 | 49 | 0.000189 | 0.001022 | 0.005085 |
| 10.5  | 100    | 120.3488 | 46994 | 23 | 0.059754 | 0.001022 | 0.005459 |
| 124.1 | 100    | 53.9028  | 19150 | 22 | 0.195461 | 0.001022 | 0.0051   |
| 181.5 | 100    | 42.1816  | 14415 | 18 | 0.598514 | 0.001114 | 0.006187 |
| 222.2 | 56.974 | 55.1643  | 18126 | 20 | 0.225433 | 0.001114 | 0.006061 |
| 4.2   | 100    | 111.9456 | 41758 | 33 | 0.022797 | 0.001114 | 0.005977 |
| 1.2   | 100    | 77.9173  | 31722 | 21 | 0.095586 | 0.001114 | 0.005984 |
| 24.1  | 100    | 46.1913  | 16090 | 31 | 0.017832 | 0.00121  | 0.00658  |
| 10.7  | 100    | 28.0734  | 8461  | 45 | 0.001065 | 0.00121  | 0.006869 |
| 256.8 | 100    | 16.4247  | 5302  | 57 | 1.55E-05 | 0.001308 | 0.006962 |
| 128.8 | 22.453 | 35.6653  | 11031 | 42 | 0.001493 | 0.00141  | 0.007299 |
| 0.8   | 100    | 98.7286  | 38026 | 23 | 0.02014  | 0.001498 | 0.007642 |
| 18.9  | 100    | 58.8179  | 23537 | 40 | 0.003289 | 0.001498 | 0.007532 |
| 0.4   | 100    | 117.1177 | 45667 | 29 | 0.002582 | 0.001498 | 0.007703 |
| 25.5  | 100    | 24.2149  | 7861  | 50 | 0.000207 | 0.001498 | 0.007874 |
| 18.2  | 100    | 44.2266  | 15758 | 39 | 0.00053  | 0.001576 | 0.008748 |
| 89    | 100    | 17.1258  | 5071  | 21 | 0.265545 | 0.001576 | 0.008469 |
| 2.2   | 100    | 138.2602 | 53756 | 22 | 0.058889 | 0.001677 | 0.008921 |
| 20.3  | 100    | 44.0773  | 15176 | 56 | 7.99E-05 | 0.001758 | 0.009257 |
| 0     | 100    | 115.2213 | 43975 | 25 | 0.006626 | 0.001758 | 0.00904  |
| 13    | 100    | 64.7639  | 23509 | 26 | 0.077482 | 0.001758 | 0.009577 |
| 1.7   | 100    | 62.1429  | 22446 | 33 | 0.016935 | 0.001758 | 0.009557 |
| 123.4 | 100    | 18.1888  | 5867  | 33 | 0.012337 | 0.001854 | 0.009686 |
| 6.3   | 100    | 19.7219  | 5797  | 21 | 0.348801 | 0.002012 | 0.01109  |
| 28.4  | 100    | 42.378   | 14954 | 60 | 1.12E-05 | 0.002012 | 0.01063  |
| 2.7   | 100    | 103.6614 | 40128 | 17 | 0.075344 | 0.002012 | 0.01051  |
| 0     | 100    | 141.8714 | 52995 | 28 | 0.035401 | 0.002079 | 0.01206  |
| 15.7  | 43.596 | 56.4166  | 22519 | 58 | 4.55E-05 | 0.002079 | 0.01217  |
| 0     | 100    | 113.7278 | 44305 | 24 | 0.05065  | 0.002079 | 0.0118   |
| 1.7   | 100    | 117.8668 | 48400 | 27 | 0.020268 | 0.002257 | 0.01277  |
| 14.4  | 100    | 52.5877  | 18638 | 44 | 0.001186 | 0.002257 | 0.01283  |
| 60.5  | 100    | 18.5867  | 5304  | 32 | 0.017468 | 0.002257 | 0.01248  |
| 48.3  | 100    | 39.2187  | 13983 | 21 | 0.174094 | 0.002315 | 0.01391  |
| 129.1 | 100    | 16.4707  | 5034  | 59 | 1.08E-05 | 0.002315 | 0.01299  |
| 0     | 100    | 119.5761 | 45612 | 22 | 0.014816 | 0.002315 | 0.01328  |
| 60.6  | 100    | 25.8067  | 8153  | 62 | 3.39E-06 | 0.002315 | 0.01304  |
| 24.8  | 39.446 | 101.8618 | 39022 | 47 | 7.32E-05 | 0.002315 | 0.01316  |
| 29.7  | 100    | 28.2222  | 9357  | 39 | 0.003933 | 0.002376 | 0.01521  |
| 29.7  | 100    | 28.2222  | 9357  | 39 | 0.003933 | 0.002376 | 0.01521  |
| 3     | 100    | 101.6275 | 39241 | 26 | 0.033525 | 0.002376 | 0.01456  |
| 42    | 100    | 60.6502  | 21889 | 50 | 0.000229 | 0.002376 | 0.01496  |
| 3.2   | 100    | 55.8231  | 18489 | 35 | 0.008967 | 0.002543 | 0.01578  |

|       |        |          |       |    |          |          |         |
|-------|--------|----------|-------|----|----------|----------|---------|
| 20.8  | 100    | 31.8239  | 10699 | 17 | 0.57211  | 0.002777 | 0.01765 |
| 11.2  | 100    | 29.6247  | 11150 | 31 | 0.023787 | 0.002777 | 0.01816 |
| 1.1   | 100    | 109.7052 | 41180 | 20 | 0.108339 | 0.002777 | 0.01731 |
| 14.4  | 100    | 78.5242  | 29182 | 23 | 0.005704 | 0.002777 | 0.01825 |
| 12    | 29.76  | 67.5057  | 27271 | 35 | 0.011404 | 0.002843 | 0.01896 |
| 24.9  | 100    | 52.1611  | 18963 | 39 | 0.001936 | 0.002843 | 0.0184  |
| 5.6   | 100    | 120.5119 | 49510 | 15 | 0.220793 | 0.002843 | 0.01841 |
| 10.1  | 100    | 36.0287  | 12410 | 31 | 0.017445 | 0.002931 | 0.01935 |
| 203.8 | 0.796  | 32.7389  | 10800 | 65 | 3.87E-06 | 0.003096 | 0.01997 |
| 6.1   | 100    | 51.967   | 19406 | 17 | 0.014524 | 0.003254 | 0.02145 |
| 77.9  | 100    | 18.1361  | 5528  | 39 | 0.003007 | 0.003254 | 0.02122 |
| 33.6  | 100    | 32.4993  | 11492 | 16 | 0.612184 | 0.00337  | 0.0242  |
| 34.4  | 100    | 46.3129  | 16659 | 37 | 0.003061 | 0.00337  | 0.02242 |
| 9.2   | 100    | 77.8548  | 26913 | 25 | 0.075325 | 0.00337  | 0.02364 |
| 33.9  | 100    | 17.1507  | 4931  | 24 | 0.145344 | 0.003736 | 0.02727 |
| 20.1  | 100    | 50.7572  | 17871 | 40 | 0.002963 | 0.00382  | 0.02792 |
| 21.2  | 100    | 52.072   | 18416 | 45 | 0.000906 | 0.003892 | 0.02843 |
| 11.6  | 100    | 57.733   | 23089 | 31 | 0.027674 | 0.003967 | 0.02873 |
| 227   | 16.498 | 45.7651  | 17934 | 47 | 0.000312 | 0.004049 | 0.02913 |
| 2.6   | 100    | 77.7729  | 26879 | 25 | 0.080035 | 0.004049 | 0.02918 |
| 40.8  | 100    | 44.5364  | 15361 | 21 | 0.274066 | 0.004124 | 0.02988 |
| 16.9  | 100    | 51.3042  | 18092 | 36 | 0.006889 | 0.004192 | 0.03036 |
| 46.4  | 100    | 38.4159  | 13370 | 16 | 0.596081 | 0.004192 | 0.03054 |
| 39.2  | 100    | 16.6085  | 4606  | 37 | 0.006489 | 0.004581 | 0.03237 |
| 39.2  | 100    | 16.6085  | 4606  | 37 | 0.006489 | 0.004581 | 0.03237 |
| 44.9  | 100    | 60.3821  | 21780 | 37 | 0.005799 | 0.00496  | 0.03459 |
| 50.8  | 100    | 40.5337  | 12711 | 21 | 0.224813 | 0.005031 | 0.0348  |
| 1.1   | 100    | 141.5619 | 52847 | 18 | 0.391757 | 0.005031 | 0.03508 |
| 0     | 100    | 115.7244 | 44166 | 20 | 0.02309  | 0.005618 | 0.03891 |
| 17.3  | 100    | 66.1632  | 24357 | 29 | 0.041972 | 0.005687 | 0.03983 |
| 2.5   | 100    | 77.0175  | 28273 | 28 | 0.000284 | 0.00573  | 0.04114 |
| 6.1   | 100    | 29.6212  | 11148 | 17 | 0.476099 | 0.005792 | 0.04266 |
| 24.8  | 100    | 48.0264  | 16776 | 34 | 0.011646 | 0.005792 | 0.04179 |
| 114.7 | 14.324 | 44.8255  | 15992 | 26 | 0.00927  | 0.005943 | 0.04337 |
| 20.1  | 100    | 62.1762  | 22816 | 28 | 0.050177 | 0.00599  | 0.0447  |
| 0     | 100    | 116.4507 | 43587 | 12 | 0.559811 | 0.006145 | 0.04578 |
| 44.9  | 100    | 61.3191  | 20657 | 17 | 0.61847  | 0.006428 | 0.04699 |
| 36.5  | 100    | 35.1307  | 10852 | 16 | 0.587782 | 0.006428 | 0.04789 |
| 3.2   | 100    | 81.9827  | 30464 | 13 | 0.58466  | 0.006497 | 0.0483  |
| 44.4  | 100    | 23.897   | 7638  | 47 | 8.94E-05 | 0.006721 | 0.04905 |
| 0     | 100    | 118.8203 | 45345 | 22 | 0.016079 | 0.006926 | 0.0505  |
| 12.8  | 100    | 39.9728  | 12516 | 30 | 0.027506 | 0.006926 | 0.04998 |
| 0     | 100    | 119.0632 | 43568 | 24 | 0.058325 | 0.007785 | 0.05575 |
| 63.3  | 3.272  | 46.6708  | 16241 | 40 | 0.003233 | 0.0081   | 0.05958 |
| 0     | 100    | 124.2206 | 51017 | 13 | 0.358333 | 0.0081   | 0.05957 |
| 65    | 100    | 56.9414  | 18808 | 28 | 0.049889 | 0.008746 | 0.06656 |
| 16.7  | 100    | 46.2632  | 16117 | 32 | 0.015558 | 0.009436 | 0.07165 |
| 7.1   | 100    | 89.3828  | 32334 | 27 | 0.053078 | 0.009514 | 0.07614 |
| 3.5   | 100    | 118.1509 | 46095 | 14 | 0.215423 | 0.009514 | 0.07329 |
| 20.4  | 100    | 59.8983  | 20083 | 28 | 0.053972 | 0.009514 | 0.07535 |
| 6.5   | 100    | 78.3168  | 29098 | 15 | 0.033666 | 0.00971  | 0.07733 |
| 121.5 | 18.055 | 45.3322  | 16190 | 26 | 0.009706 | 0.009764 | 0.07858 |

|       |        |          |       |    |          |          |          |
|-------|--------|----------|-------|----|----------|----------|----------|
| 33    | 100    | 59.1161  | 21251 | 35 | 0.009645 | 0.009818 | 0.07915  |
| 0     | 100    | 120.0828 | 45792 | 14 | 0.086647 | 0.009858 | 0.08086  |
| 102.6 | 4.102  | 70.4982  | 26082 | 59 | 5.43E-05 | 0        | 4.55E-05 |
| 32    | 100    | 71.2621  | 26387 | 47 | 0.000933 | 0        | 0.000246 |
| 44.2  | 9.858  | 71.0013  | 26278 | 61 | 3.77E-05 | 0        | 3.16E-05 |
| 34    | 40.16  | 70.7561  | 26192 | 49 | 0.000527 | 0        | 0.000286 |
| 23.5  | 100    | 25.9976  | 8522  | 34 | 0.01362  | 0        | 1.47E-05 |
| 1.3   | 100    | 18.2706  | 5586  | 69 | 3.13E-06 | 0        | 0.00016  |
| 19.8  | 100    | 77.6072  | 27411 | 43 | 0.002386 | 0        | 6.22E-06 |
| 22.2  | 100    | 68.8647  | 23728 | 36 | 0.009413 | 0        | 0.000897 |
| 30.3  | 10.973 | 140.9364 | 57680 | 56 | 7.07E-05 | 0        | 3.53E-05 |
| 39.2  | 100    | 140.9044 | 57665 | 62 | 1.9E-05  | 0        | 1.75E-07 |
| 68.3  | 100    | 140.593  | 57509 | 83 | 1.35E-07 | 0        | 1.16E-08 |
| 79.1  | 30.463 | 27.5069  | 9520  | 42 | 0.002791 | 0        | 2.21E-06 |
| 67    | 66.037 | 27.5436  | 9537  | 45 | 0.001287 | 0        | 1.05E-06 |
| 66.3  | 100    | 30.2919  | 10624 | 38 | 0.006659 | 0        | 0.001379 |
| 18.4  | 100    | 28.5132  | 9916  | 24 | 0.139528 | 0        | 0.000846 |
| 18    | 100    | 28.0092  | 9726  | 38 | 0.006703 | 0        | 6.12E-05 |
| 22.8  | 100    | 56.0601  | 18473 | 49 | 0.000397 | 0        | 1.42E-05 |
| 40.4  | 100    | 55.5525  | 18283 | 22 | 0.183433 | 0        | 0.000689 |
| 61.3  | 100    | 55.5503  | 18282 | 43 | 0.001272 | 0        | 2.97E-06 |
| 23.7  | 100    | 55.0473  | 18079 | 52 | 0.0002   | 0        | 1.33E-05 |
| 0.4   | 100    | 18.2579  | 5192  | 69 | 3.33E-06 | 0        | 0.000106 |
| 19.7  | 100    | 91.1133  | 32202 | 47 | 0.000898 | 0        | 1.34E-06 |
| 93    | 5.574  | 72.9556  | 24965 | 69 | 4.46E-06 | 0        | 1.33E-07 |
| 27.4  | 100    | 72.4441  | 24758 | 58 | 5.61E-05 | 0        | 8.63E-06 |
| 24.2  | 100    | 72.1911  | 24661 | 58 | 7.91E-05 | 0        | 0.000119 |
| 66    | 65.108 | 72.7331  | 24872 | 48 | 0.00057  | 0        | 0.000446 |
| 50.5  | 100    | 73.458   | 25170 | 60 | 3.49E-05 | 0        | 3.34E-06 |
| 14.9  | 100    | 84.413   | 29493 | 43 | 0.002571 | 0        | 9.14E-06 |
| 69.5  | 100    | 77.2499  | 28567 | 39 | 0.005734 | 0        | 4.09E-08 |
| 14.3  | 100    | 77.1529  | 28523 | 20 | 0.463968 | 0        | 0.000851 |
| 60.1  | 22.821 | 77.6636  | 28752 | 54 | 0.000168 | 0        | 3.48E-09 |
| 19.6  | 100    | 70.7301  | 25899 | 54 | 0.000186 | 0        | 0.000281 |
| 8.1   | 100    | 52.9991  | 18789 | 48 | 0.000471 | 0        | 5.05E-05 |
| 5.3   | 100    | 21.4659  | 6343  | 65 | 6.09E-06 | 0        | 0.000557 |
| 17.8  | 100    | 54.3985  | 19348 | 46 | 0.000917 | 0        | 0.000299 |
| 13.5  | 100    | 68.5733  | 25041 | 42 | 0.002588 | 0        | 0.00107  |
| 0     | 100    | 18.2183  | 5314  | 83 | 1.35E-07 | 0        | 9.08E-06 |
| 10.5  | 100    | 17.3707  | 5004  | 34 | 0.012754 | 0        | 0.000964 |
| 42.8  | 4.127  | 98.6169  | 37380 | 83 | 1.99E-07 | 0        | 5.56E-11 |
| 45.6  | 12.529 | 99.1197  | 37613 | 95 | 1.08E-08 | 0        | 6.02E-13 |
| 15.5  | 100    | 99.9387  | 37978 | 67 | 8.13E-06 | 0        | 1E-08    |
| 28.9  | 100    | 52.3412  | 18961 | 33 | 0.019702 | 0        | 0.000722 |
| 52.7  | 28.402 | 52.4151  | 18990 | 65 | 1.17E-05 | 0        | 8.91E-07 |
| 43.6  | 35.711 | 52.8443  | 19165 | 55 | 0.00013  | 0        | 7.37E-05 |
| 35.9  | 70.836 | 52.9166  | 19193 | 47 | 0.000718 | 0        | 0.000347 |
| 4.7   | 100    | 70.105   | 26141 | 92 | 1.42E-08 | 0        | 1.24E-05 |
| 21.6  | 16.144 | 88.1733  | 33489 | 42 | 0.002468 | 0        | 0.000367 |
| 50.7  | 39.35  | 87.7602  | 33304 | 55 | 0.000152 | 0        | 0.000111 |
| 47.7  | 100    | 87.6629  | 33259 | 58 | 7.34E-05 | 0        | 1.31E-05 |
| 74.5  | 15.415 | 93.7179  | 35865 | 51 | 0.000363 | 0        | 0.000286 |

|       |        |          |       |    |          |          |          |
|-------|--------|----------|-------|----|----------|----------|----------|
| 77.1  | 59.478 | 38.4553  | 13386 | 55 | 8.66E-05 | 0        | 0.000698 |
| 147.4 | 30.322 | 38.8284  | 13535 | 38 | 0.004959 | 0        | 0.000594 |
| 11.1  | 100    | 38.9628  | 13590 | 53 | 0.000169 | 0        | 0.000167 |
| 42.9  | 100    | 39.3348  | 13729 | 37 | 0.00599  | 0        | 0.001445 |
| 100.7 | 17.855 | 31.816   | 10763 | 49 | 0.000569 | 0        | 0.000954 |
| 48.9  | 7.647  | 62.7105  | 22725 | 39 | 0.00442  | 0        | 1.2E-05  |
| 59.8  | 80.907 | 63.2171  | 22947 | 36 | 0.008885 | 0        | 1.64E-05 |
| 53.6  | 17.212 | 62.9511  | 22829 | 36 | 0.008684 | 0        | 2.58E-05 |
| 103.5 | 100    | 28.1521  | 9051  | 39 | 0.00454  | 0        | 0.000722 |
| 0.9   | 100    | 75.2384  | 27997 | 67 | 2.67E-06 | 0        | 0.000386 |
| 134.9 | 3.665  | 68.3657  | 25071 | 55 | 0.000111 | 0        | 0.000442 |
| 51.9  | 16.137 | 72.1253  | 26661 | 63 | 2.24E-05 | 0        | 1.32E-05 |
| 18.5  | 69.231 | 72.1151  | 26656 | 77 | 8.64E-07 | 0        | 5.9E-06  |
| 62.3  | 100    | 71.6183  | 26442 | 66 | 1.12E-05 | 0        | 6.95E-06 |
| 13.1  | 17.024 | 68.534   | 27734 | 65 | 1.33E-05 | 0        | 6.8E-06  |
| 5.9   | 30.629 | 45.2897  | 16170 | 70 | 2.45E-06 | 0        | 0.000265 |
| 3.3   | 86.42  | 45.7981  | 16389 | 74 | 1.04E-06 | 0        | 5.94E-05 |
| 49    | 8.37   | 50.6039  | 20016 | 37 | 0.009753 | 0        | 9.11E-08 |
| 0     | 100    | 46.3041  | 16579 | 83 | 1.13E-07 | 0        | 6.77E-06 |
| 19.4  | 100    | 50.1002  | 19797 | 30 | 0.039159 | 0        | 0.000155 |
| 33.9  | 3.506  | 68.5014  | 27719 | 58 | 6.87E-05 | 0        | 1.43E-05 |
| 113.5 | 6.474  | 68.0991  | 27543 | 78 | 4.97E-07 | 0        | 8E-05    |
| 113.1 | 100    | 78.6045  | 27854 | 35 | 0.013314 | 0        | 0.000491 |
| 7.8   | 100    | 52.267   | 18883 | 78 | 3.5E-07  | 0        | 0.000263 |
| 42.9  | 100    | 78.948   | 28005 | 45 | 0.00149  | 0        | 3.7E-06  |
| 113.9 | 6.617  | 54.78    | 21825 | 50 | 0.00044  | 0        | 0.00048  |
| 192.6 | 9.722  | 55.4387  | 22105 | 50 | 0.000211 | 0        | 0.001273 |
| 45.4  | 100    | 78.1115  | 27637 | 38 | 0.007126 | 0        | 3.5E-05  |
| 48.4  | 30.128 | 78.1094  | 27636 | 52 | 0.000293 | 0        | 9.43E-07 |
| 51.3  | 71.144 | 25.2603  | 9375  | 31 | 0.029273 | 0        | 6.53E-05 |
| 61.1  | 100    | 36.7102  | 14110 | 38 | 0.007982 | 0        | 1.47E-05 |
| 21.8  | 100    | 33.5109  | 12758 | 62 | 2.54E-05 | 0        | 4.28E-06 |
| 9.5   | 100    | 37.9527  | 13176 | 42 | 0.001802 | 0.000141 | 0.001627 |
| 31.1  | 100    | 41.6408  | 14663 | 35 | 0.011372 | 0.000141 | 0.001596 |
| 10.6  | 100    | 67.9924  | 27497 | 36 | 0.010763 | 0.000273 | 0.002029 |
| 43.1  | 100    | 48.7776  | 17125 | 37 | 0.008265 | 0.000273 | 0.002082 |
| 13.9  | 100    | 59.4259  | 19897 | 17 | 0.883645 | 0.000273 | 0.001955 |
| 2.1   | 100    | 57.5686  | 23025 | 57 | 6.33E-05 | 0.000273 | 0.002081 |
| 30.9  | 100    | 64.4539  | 23452 | 45 | 0.001411 | 0.000273 | 0.001919 |
| 19.2  | 100    | 50.6609  | 20043 | 18 | 0.678087 | 0.000273 | 0.001958 |
| 9     | 100    | 37.9857  | 11803 | 53 | 6.41E-05 | 0.000273 | 0.001912 |
| 33    | 100    | 32.1135  | 10877 | 40 | 0.004789 | 0.000525 | 0.002268 |
| 153.5 | 3.227  | 38.3233  | 13329 | 38 | 0.005149 | 0.00065  | 0.002757 |
| 1.3   | 100    | 124.5492 | 45796 | 25 | 0.139936 | 0.00065  | 0.002667 |
| 16.9  | 100    | 26.9959  | 9326  | 20 | 0.350616 | 0.000758 | 0.002808 |
| 157.4 | 100    | 17.9939  | 6118  | 32 | 0.029843 | 0.000758 | 0.002787 |
| 10.9  | 100    | 62.2095  | 22514 | 22 | 0.267783 | 0.000868 | 0.003266 |
| 10.5  | 100    | 78.1663  | 28980 | 32 | 0.028094 | 0.000951 | 0.004502 |
| 13.6  | 100    | 62.7906  | 22758 | 22 | 0.22119  | 0.000951 | 0.004516 |
| 12.9  | 100    | 91.6989  | 33286 | 38 | 0.006515 | 0.000951 | 0.003669 |
| 128.4 | 4.583  | 31.6057  | 10675 | 48 | 0.000882 | 0.000951 | 0.004416 |
| 95.6  | 100    | 36.4025  | 12185 | 31 | 0.028102 | 0.000951 | 0.004453 |

|       |        |          |       |    |          |          |          |
|-------|--------|----------|-------|----|----------|----------|----------|
| 5.7   | 100    | 118.3175 | 43277 | 21 | 0.358474 | 0.000951 | 0.00389  |
| 15    | 100    | 53.0516  | 19180 | 50 | 0.000182 | 0.001022 | 0.005301 |
| 19.8  | 100    | 30.2348  | 10600 | 43 | 0.002073 | 0.001022 | 0.004909 |
| 129.3 | 100    | 67.8628  | 24859 | 25 | 0.147182 | 0.001114 | 0.005994 |
| 125.5 | 18.719 | 31.8283  | 10768 | 43 | 0.002186 | 0.001114 | 0.006079 |
| 44.3  | 100    | 30.9887  | 10583 | 26 | 0.106735 | 0.00121  | 0.006771 |
| 5.1   | 100    | 18.0396  | 6142  | 47 | 0.000931 | 0.001308 | 0.006971 |
| 4.9   | 100    | 71.0704  | 26033 | 27 | 0.075916 | 0.001308 | 0.00702  |
| 30.5  | 70.566 | 45.2017  | 16135 | 43 | 0.001309 | 0.001576 | 0.008439 |
| 47.9  | 100    | 53.7008  | 21366 | 34 | 0.018365 | 0.001576 | 0.00813  |
| 5.6   | 100    | 73.8045  | 27092 | 37 | 0.007248 | 0.001758 | 0.009245 |
| 16.6  | 100    | 15.4469  | 4327  | 27 | 0.070234 | 0.002012 | 0.01064  |
| 42.3  | 100    | 29.7868  | 10415 | 29 | 0.056106 | 0.002012 | 0.01111  |
| 13.2  | 100    | 50.2061  | 19845 | 24 | 0.148198 | 0.002079 | 0.01215  |
| 14.7  | 100    | 51.2293  | 20293 | 45 | 0.000822 | 0.002079 | 0.01138  |
| 47.9  | 100    | 55.2146  | 20174 | 35 | 0.015416 | 0.002315 | 0.01398  |
| 371.8 | 63.233 | 19.0511  | 6643  | 21 | 0.11998  | 0.002315 | 0.01322  |
| 12.9  | 100    | 53.0273  | 18799 | 14 | 1.230682 | 0.002376 | 0.01449  |
| 13    | 100    | 45.3168  | 16183 | 29 | 0.034809 | 0.002376 | 0.01495  |
| 11.9  | 100    | 30.6017  | 10426 | 42 | 0.001625 | 0.002719 | 0.01673  |
| 16.1  | 100    | 91.6672  | 33273 | 28 | 0.070465 | 0.002777 | 0.01795  |
| 16.3  | 100    | 74.1296  | 25464 | 24 | 0.166078 | 0.002777 | 0.01719  |
| 31.4  | 100    | 33.6822  | 11490 | 20 | 0.424445 | 0.002843 | 0.019    |
| 106.5 | 100    | 64.0508  | 21739 | 8  | 6.168    | 0.002843 | 0.01835  |
| 20.2  | 100    | 53.8969  | 19147 | 34 | 0.013269 | 0.003096 | 0.02021  |
| 3.3   | 100    | 100.4564 | 38215 | 14 | 1.424836 | 0.00337  | 0.02169  |
| 7.7   | 100    | 38.6478  | 12037 | 38 | 0.00479  | 0.003533 | 0.02471  |
| 182.5 | 100    | 41.3213  | 15997 | 16 | 0.742754 | 0.003736 | 0.02783  |
| 0     | 100    | 95.1524  | 39004 | 14 | 1.186757 | 0.004266 | 0.03111  |
| 7.6   | 100    | 71.5077  | 26482 | 23 | 0.194632 | 0.004344 | 0.03125  |
| 1.4   | 100    | 90.4682  | 34498 | 37 | 0.005263 | 0.004581 | 0.03251  |
| 96.3  | 100    | 54.9366  | 21900 | 35 | 0.007164 | 0.00599  | 0.0448   |
| 80.8  | 100    | 50.611   | 17811 | 20 | 0.170258 | 0.00599  | 0.0454   |
| 18.4  | 100    | 53.5227  | 19436 | 20 | 0.397097 | 0.00599  | 0.04452  |
| 0     | 100    | 17.3772  | 5007  | 47 | 0.000628 | 0.007423 | 0.05363  |
| 42.7  | 100    | 68.8695  | 25280 | 28 | 0.067275 | 0.007423 | 0.05402  |
| 37.2  | 11.922 | 68.1272  | 27555 | 32 | 0.020274 | 0.007903 | 0.05772  |
| 8.4   | 100    | 27.5416  | 9536  | 25 | 0.120517 | 0.008559 | 0.06424  |
| 13.7  | 100    | 94.2212  | 36084 | 30 | 0.041345 | 0.008997 | 0.06879  |
| 10.4  | 100    | 73.2358  | 25076 | 30 | 0.035402 | 0.008997 | 0.06968  |
| 1.7   | 100    | 26.0163  | 7821  | 13 | 1.885086 | 0.009141 | 0.07057  |
| 81.5  | 100    | 50.1069  | 17599 | 19 | 0.197291 | 0.009498 | 0.07238  |
| 4.4   | 100    | 84.0427  | 29354 | 6  | 11.34941 | 0.009514 | 0.07581  |
| 3.1   | 100    | 77.2761  | 28819 | 36 | 0.008588 | 0.009514 | 0.07644  |
| 16.8  | 100    | 53.1485  | 19283 | 36 | 0.00492  | 0.009858 | 0.08036  |
| 16.5  | 100    | 81.2834  | 30512 | 18 | 0.446098 | 0.009858 | 0.07998  |
| 0     | 100    | 92.2409  | 34446 | 53 | 8.71E-05 | 0        | 3.38E-05 |
| 3.7   | 100    | 91.7358  | 34267 | 65 | 6.38E-06 | 0        | 1.89E-07 |
| 3.3   | 100    | 108.0089 | 40577 | 45 | 0.001588 | 0        | 0.000282 |
| 5.5   | 100    | 108.0186 | 40581 | 41 | 0.003479 | 0        | 0.000303 |
| 22.5  | 100    | 54.3853  | 19841 | 36 | 0.00689  | 0        | 0.000656 |
| 0.8   | 100    | 136.1931 | 50323 | 54 | 0.000126 | 0        | 2.67E-05 |



|       |        |          |       |    |          |          |          |
|-------|--------|----------|-------|----|----------|----------|----------|
| 21.8  | 70.079 | 140.7527 | 55358 | 64 | 1.38E-05 | 0        | 1.66E-08 |
| 41.1  | 100    | 63.0721  | 23258 | 39 | 0.000912 | 0        | 0.000363 |
| 15.7  | 100    | 17.8411  | 6042  | 22 | 0.248296 | 0        | 0.000525 |
| 63.4  | 100    | 16.7754  | 5467  | 40 | 0.003593 | 0        | 0.000144 |
| 14.8  | 100    | 33.1853  | 11295 | 32 | 0.014737 | 0        | 0.001053 |
| 3.8   | 100    | 112.778  | 43884 | 41 | 0.002327 | 0        | 0.001411 |
| 39.1  | 100    | 112.7319 | 43863 | 48 | 0.000477 | 0        | 0.000109 |
| 54.2  | 100    | 42.2961  | 14920 | 53 | 0.000164 | 0        | 0.000707 |
| 13.5  | 100    | 126.5421 | 48072 | 59 | 2.24E-06 | 0        | 0.000257 |
| 47.9  | 100    | 49.5652  | 19568 | 42 | 0.003009 | 0        | 4.75E-05 |
| 50.7  | 100    | 60.6054  | 24312 | 32 | 0.026913 | 0        | 0.000156 |
| 30.8  | 100    | 93.1482  | 33887 | 53 | 0.000206 | 0        | 6.65E-06 |
| 51.3  | 100    | 36.4276  | 12566 | 54 | 8.99E-05 | 0.000273 | 0.002004 |
| 34.6  | 100    | 56.0533  | 20281 | 49 | 0.000574 | 0.000758 | 0.003238 |
| 211.4 | 52.554 | 15.3499  | 4734  | 45 | 0.000542 | 0.000951 | 0.003828 |
| 45.2  | 100    | 71.6884  | 26270 | 33 | 0.022691 | 0.001022 | 0.005496 |
| 9     | 100    | 73.016   | 27305 | 13 | 0.305545 | 0.001022 | 0.005108 |
| 19    | 100    | 34.4027  | 13126 | 19 | 0.422026 | 0.001498 | 0.007556 |
| 31.6  | 100    | 25.439   | 8313  | 10 | 4.618366 | 0.001576 | 0.008745 |
| 9.8   | 100    | 33.7925  | 12875 | 22 | 0.179954 | 0.001576 | 0.008586 |
| 0.4   | 100    | 120.805  | 45145 | 20 | 0.401781 | 0.001758 | 0.009073 |
| 35.4  | 100    | 15.4239  | 4484  | 35 | 0.009822 | 0.001854 | 0.009889 |
| 0.3   | 100    | 89.2768  | 33502 | 23 | 0.19923  | 0.002012 | 0.01025  |
| 30.6  | 100    | 26.6313  | 9195  | 9  | 5.528165 | 0.002079 | 0.01152  |
| 26.4  | 100    | 42.275   | 14912 | 41 | 0.002747 | 0.002376 | 0.01459  |
| 102.7 | 100    | 36.5862  | 13018 | 27 | 0.061835 | 0.002777 | 0.01742  |
| 17    | 100    | 141.6247 | 54803 | 26 | 0.101342 | 0.003096 | 0.02018  |
| 91.8  | 76.113 | 24.112   | 8871  | 34 | 0.014233 | 0.003096 | 0.01966  |
| 31.4  | 100    | 74.3687  | 27630 | 33 | 0.009444 | 0.004192 | 0.03019  |
| 3.6   | 100    | 85.81    | 32016 | 21 | 0.314767 | 0.004192 | 0.03052  |
| 12.8  | 100    | 54.8104  | 21840 | 17 | 0.15896  | 0.004266 | 0.03087  |
| 24.4  | 100    | 66.4393  | 24189 | 26 | 0.089914 | 0.004581 | 0.03219  |
| 6.2   | 100    | 70.6116  | 26127 | 69 | 5.39E-06 | 0        | 9.67E-05 |
| 17.9  | 100    | 72.8207  | 26986 | 56 | 3.97E-05 | 0        | 0.000754 |
| 213.6 | 18.957 | 17.3919  | 5188  | 38 | 0.004239 | 0        | 0.00013  |
| 100.1 | 44.491 | 46.2486  | 16111 | 44 | 0.001189 | 0        | 5.27E-06 |
| 142   | 100    | 140.3643 | 51917 | 59 | 5.82E-05 | 0        | 2.13E-06 |
| 274.6 | 71.288 | 140.3556 | 51913 | 87 | 8.45E-08 | 0        | 3.81E-10 |
| 256.3 | 21.67  | 140.3538 | 51912 | 73 | 2.31E-06 | 0        | 1.91E-08 |
| 52    | 100    | 14.7186  | 4099  | 31 | 0.033062 | 0        | 0.000593 |
| 63.2  | 4.102  | 35.1239  | 12495 | 61 | 2.7E-05  | 0        | 0.000147 |
| 53.6  | 71.662 | 36.129   | 12852 | 59 | 4.49E-05 | 0        | 3.72E-05 |
| 284.3 | 73.389 | 17.2251  | 5400  | 39 | 0.002806 | 0        | 1.77E-05 |
| 139.4 | 9.384  | 140.3807 | 57408 | 66 | 9.93E-06 | 0        | 1.06E-07 |
| 261.8 | 99.45  | 17.7371  | 5650  | 37 | 0.004766 | 0        | 2.72E-05 |
| 108.7 | 100    | 18.2472  | 5897  | 36 | 0.005658 | 0        | 3.35E-05 |
| 34.5  | 100    | 58.2376  | 19313 | 33 | 0.00682  | 0        | 0.000469 |
| 94    | 12.786 | 68.7768  | 23351 | 50 | 0.000366 | 0        | 3.72E-10 |
| 61.4  | 100    | 17.4067  | 4889  | 41 | 0.001626 | 0        | 9.85E-05 |
| 105.5 | 100    | 26.5853  | 7952  | 28 | 0.017751 | 0        | 0.000143 |
| 234.8 | 8.901  | 26.0834  | 7774  | 37 | 0.002048 | 0        | 0.000197 |
| 158   | 100    | 25.5774  | 7602  | 30 | 0.010118 | 0        | 0.000617 |

|       |        |          |       |     |          |   |          |
|-------|--------|----------|-------|-----|----------|---|----------|
| 161.1 | 100    | 24.6946  | 7319  | 27  | 0.023786 | 0 | 0.001427 |
| 117.6 | 100    | 24.6376  | 7301  | 26  | 0.025901 | 0 | 0.000214 |
| 22.8  | 100    | 15.017   | 4093  | 29  | 0.063465 | 0 | 0.001118 |
| 23.4  | 100    | 80.8453  | 28092 | 53  | 7.53E-05 | 0 | 5.52E-06 |
| 41.7  | 47.824 | 80.7307  | 28046 | 74  | 5.05E-07 | 0 | 6.59E-08 |
| 25.7  | 7.964  | 80.7255  | 28043 | 67  | 2.37E-06 | 0 | 3.34E-08 |
| 6     | 100    | 80.2215  | 27836 | 45  | 0.000414 | 0 | 4.99E-05 |
| 92.9  | 42.305 | 77.442   | 28653 | 59  | 4.33E-05 | 0 | 0.000239 |
| 33.4  | 18.014 | 77.242   | 28563 | 50  | 0.000406 | 0 | 7.57E-05 |
| 18.2  | 25.772 | 77.2412  | 28562 | 36  | 0.009542 | 0 | 0.000985 |
| 63.9  | 100    | 46.7533  | 16311 | 44  | 0.001089 | 0 | 5.07E-06 |
| 18.9  | 100    | 16.7365  | 4778  | 38  | 0.004319 | 0 | 1.5E-05  |
| 40.1  | 100    | 17.3529  | 4997  | 35  | 0.008455 | 0 | 0.000627 |
| 9     | 100    | 139.8047 | 51936 | 78  | 2.69E-07 | 0 | 1.24E-12 |
| 14.4  | 97.578 | 118.6164 | 45850 | 37  | 0.007713 | 0 | 2.99E-05 |
| 31.3  | 100    | 118.6079 | 45846 | 65  | 1.32E-05 | 0 | 5.94E-09 |
| 2.8   | 100    | 118.1047 | 45643 | 39  | 0.004968 | 0 | 0.000185 |
| 27.1  | 56.58  | 140.4967 | 52268 | 81  | 2.76E-07 | 0 | 1.88E-11 |
| 26.1  | 100    | 58.5855  | 21452 | 35  | 0.007427 | 0 | 0.000657 |
| 37.6  | 15.395 | 100.8577 | 38932 | 56  | 9.4E-05  | 0 | 7.16E-05 |
| 30.8  | 10.88  | 100.8287 | 38922 | 72  | 2.05E-06 | 0 | 1.65E-05 |
| 22.8  | 100    | 140.0876 | 53940 | 74  | 1.64E-06 | 0 | 6.7E-09  |
| 251.7 | 39.559 | 140.058  | 53926 | 90  | 3.74E-08 | 0 | 1.77E-13 |
| 182.1 | 22.05  | 140.0568 | 53925 | 53  | 0.000216 | 0 | 1.06E-08 |
| 13.1  | 9.241  | 89.067   | 33891 | 67  | 5.99E-06 | 0 | 1.29E-05 |
| 50.4  | 2.669  | 89.0427  | 33881 | 75  | 8.9E-07  | 0 | 4.69E-08 |
| 8.3   | 100    | 89.5618  | 34108 | 42  | 0.002146 | 0 | 0.000632 |
| 46.2  | 17.035 | 86.3648  | 32708 | 74  | 1.53E-06 | 0 | 3.69E-05 |
| 43.6  | 8.627  | 86.3536  | 32702 | 59  | 4.38E-05 | 0 | 0.000463 |
| 62.9  | 11.783 | 59.9521  | 21996 | 51  | 0.000174 | 0 | 0.000704 |
| 15.9  | 100    | 64.3549  | 23782 | 44  | 0.001049 | 0 | 0.000786 |
| 102.9 | 100    | 14.617   | 4367  | 28  | 0.067585 | 0 | 0.000631 |
| 16.5  | 100    | 14.597   | 4356  | 39  | 0.005969 | 0 | 0.001557 |
| 416.4 | 100    | 140.5042 | 54143 | 129 | 3.98E-12 | 0 | 1.76E-14 |
| 96.5  | 100    | 16.5451  | 5352  | 32  | 0.020679 | 0 | 1.29E-05 |
| 50.2  | 100    | 40.682   | 14275 | 40  | 0.000575 | 0 | 4.26E-05 |
| 27.6  | 100    | 140.103  | 53947 | 111 | 3.32E-10 | 0 | 2.49E-13 |
| 21.5  | 100    | 140.0942 | 53943 | 46  | 0.001109 | 0 | 2.58E-06 |
| 31.1  | 6.306  | 140.4974 | 54139 | 94  | 1.35E-08 | 0 | 3.95E-12 |
| 5.9   | 100    | 136.682  | 53194 | 36  | 0.011338 | 0 | 0.000832 |
| 29.8  | 49.692 | 136.1776 | 53012 | 38  | 0.008221 | 0 | 1.47E-05 |
| 36.2  | 10.961 | 64.5565  | 23494 | 34  | 0.015097 | 0 | 5.09E-05 |
| 38.7  | 14.271 | 65.0624  | 23697 | 55  | 0.000119 | 0 | 3.13E-06 |
| 31.1  | 100    | 63.2979  | 22980 | 41  | 0.00295  | 0 | 3.42E-05 |
| 55.2  | 100    | 54.4117  | 19360 | 37  | 0.006612 | 0 | 0.000516 |
| 77.7  | 34.056 | 28.4256  | 9161  | 36  | 0.011623 | 0 | 0.000481 |
| 28.1  | 68.481 | 55.8586  | 19923 | 43  | 0.000606 | 0 | 0.00019  |
| 90.8  | 43.27  | 69.5727  | 25578 | 36  | 0.00766  | 0 | 5.1E-05  |
| 45.3  | 23.771 | 45.9573  | 18015 | 46  | 0.000979 | 0 | 0.000894 |
| 22.7  | 61.042 | 141.2613 | 54596 | 54  | 0.000135 | 0 | 1.4E-05  |
| 107.1 | 100    | 141.2597 | 54595 | 88  | 5.06E-08 | 0 | 8.57E-07 |
| 29.8  | 100    | 141.3227 | 54631 | 94  | 1.12E-08 | 0 | 1.33E-10 |

|       |        |          |       |     |          |          |          |
|-------|--------|----------|-------|-----|----------|----------|----------|
| 83.6  | 100    | 141.3097 | 54624 | 133 | 1.45E-12 | 0        | 4.01E-14 |
| 46.9  | 100    | 26.6301  | 9945  | 37  | 0.006227 | 0        | 0.000122 |
| 120   | 100    | 23.8304  | 8748  | 43  | 0.001432 | 0        | 2.49E-05 |
| 10.3  | 100    | 22.7596  | 8285  | 76  | 9.37E-07 | 0        | 0.000155 |
| 9.6   | 100    | 23.2651  | 8507  | 63  | 1.92E-05 | 0        | 0.000188 |
| 165.6 | 100    | 23.3273  | 8531  | 30  | 0.036481 | 0        | 0.000156 |
| 15.5  | 98.923 | 21.745   | 7847  | 49  | 0.000512 | 0        | 0.00078  |
| 129.4 | 28.589 | 21.7733  | 7861  | 29  | 0.016008 | 0        | 0.000459 |
| 11.4  | 100    | 61.9529  | 22522 | 54  | 5.05E-05 | 0        | 0.000826 |
| 11.7  | 26.112 | 140.7401 | 54271 | 82  | 2.31E-07 | 0        | 2.21E-09 |
| 190.6 | 41.991 | 140.7391 | 54270 | 101 | 3.03E-09 | 0        | 1.2E-09  |
| 1.3   | 100    | 38.315   | 13325 | 54  | 0.000129 | 0.000141 | 0.001596 |
| 0.3   | 100    | 139.8398 | 51952 | 24  | 0.062048 | 0.000141 | 0.001617 |
| 16.6  | 100    | 65.1883  | 22206 | 19  | 0.440745 | 0.000141 | 0.001568 |
| 195.8 | 28.758 | 28.4266  | 9162  | 31  | 0.038599 | 0.000273 | 0.002005 |
| 2.5   | 100    | 81.5512  | 28362 | 33  | 0.006185 | 0.000273 | 0.002039 |
| 6.6   | 100    | 45.5233  | 17818 | 41  | 0.003104 | 0.000273 | 0.002097 |
| 5.9   | 75.889 | 141.167  | 57792 | 55  | 0.000108 | 0.000407 | 0.002158 |
| 3.6   | 100    | 98.6     | 37972 | 53  | 0.000179 | 0.000525 | 0.002221 |
| 1.9   | 100    | 140.3851 | 57410 | 34  | 0.019119 | 0.00065  | 0.002753 |
| 20.4  | 56.893 | 136.1568 | 53004 | 53  | 0.000276 | 0.000758 | 0.003194 |
| 90.6  | 100    | 21.3274  | 6198  | 21  | 0.097905 | 0.000758 | 0.003107 |
| 8.9   | 100    | 21.2244  | 7629  | 58  | 6.35E-05 | 0.000758 | 0.002881 |
| 97.6  | 2.302  | 45.7776  | 17942 | 47  | 0.000752 | 0.000758 | 0.003033 |
| 164.6 | 78.853 | 45.4495  | 17783 | 45  | 0.001317 | 0.000868 | 0.003592 |
| 3.8   | 100    | 101.3351 | 39123 | 36  | 0.007898 | 0.000868 | 0.003442 |
| 104.2 | 3.391  | 59.7134  | 21898 | 42  | 0.001504 | 0.000868 | 0.00348  |
| 41.4  | 29.369 | 86.3808  | 32716 | 47  | 0.000664 | 0.000868 | 0.003375 |
| 11.1  | 100    | 68.9537  | 23418 | 18  | 0.656412 | 0.000868 | 0.003444 |
| 33.7  | 100    | 58.4483  | 20962 | 34  | 0.009264 | 0.000868 | 0.003543 |
| 20.2  | 100    | 142.8534 | 49722 | 23  | 0.195018 | 0.000951 | 0.003743 |
| 9.1   | 100    | 28.9285  | 9369  | 34  | 0.016899 | 0.001022 | 0.005028 |
| 9.1   | 100    | 34.9591  | 11996 | 39  | 0.004841 | 0.001022 | 0.005325 |
| 13.4  | 100    | 70.3721  | 25745 | 43  | 0.000756 | 0.001022 | 0.005046 |
| 50.9  | 100    | 16.7246  | 4773  | 22  | 0.212991 | 0.001022 | 0.005139 |
| 66    | 100    | 140.5407 | 57483 | 53  | 0.000163 | 0.001022 | 0.005631 |
| 8     | 100    | 65.8658  | 23955 | 34  | 0.002574 | 0.001022 | 0.004935 |
| 20.1  | 100    | 64.2604  | 23736 | 22  | 0.129825 | 0.001022 | 0.00573  |
| 3.6   | 100    | 100.3559 | 38708 | 32  | 0.023308 | 0.001022 | 0.005504 |
| 32.2  | 100    | 77.1779  | 28615 | 47  | 0.000261 | 0.001022 | 0.004762 |
| 27.6  | 100    | 17.2404  | 5408  | 36  | 0.006111 | 0.001022 | 0.005016 |
| 16    | 100    | 35.6277  | 12678 | 46  | 0.000966 | 0.001114 | 0.006158 |
| 77    | 100    | 14.55    | 4153  | 31  | 0.03488  | 0.00141  | 0.007307 |
| 11.9  | 100    | 22.6092  | 7679  | 27  | 0.024904 | 0.00141  | 0.007377 |
| 15.8  | 100    | 14.7426  | 4080  | 25  | 0.153128 | 0.001498 | 0.007896 |
| 63.7  | 100    | 28.9346  | 9372  | 12  | 3.008395 | 0.001677 | 0.008914 |
| 15.4  | 100    | 68.4449  | 23219 | 13  | 1.902935 | 0.001758 | 0.009006 |
| 67.1  | 100    | 34.928   | 11984 | 26  | 0.084276 | 0.001758 | 0.009412 |
| 14.3  | 100    | 78.2081  | 27046 | 30  | 0.04644  | 0.001945 | 0.01015  |
| 40.5  | 100    | 36.2809  | 12138 | 45  | 0.000531 | 0.002012 | 0.01073  |
| 235.4 | 55.944 | 14.5906  | 4353  | 31  | 0.037699 | 0.002012 | 0.01059  |
| 40.9  | 100    | 18.4175  | 5978  | 48  | 0.000266 | 0.002012 | 0.01069  |

|       |        |          |       |    |          |          |          |
|-------|--------|----------|-------|----|----------|----------|----------|
| 65.5  | 100    | 35.4307  | 12176 | 27 | 0.06778  | 0.002012 | 0.01039  |
| 9.6   | 100    | 22.2518  | 8073  | 43 | 0.00202  | 0.002012 | 0.01071  |
| 0.6   | 100    | 138.4501 | 56620 | 21 | 0.384381 | 0.002012 | 0.01125  |
| 28.2  | 100    | 77.7052  | 26851 | 24 | 0.171704 | 0.002079 | 0.01215  |
| 2.4   | 100    | 137.4292 | 53787 | 29 | 0.062061 | 0.002257 | 0.0125   |
| 57.2  | 100    | 72.3165  | 26797 | 45 | 0.000492 | 0.002376 | 0.01466  |
| 23.6  | 100    | 30.0518  | 9799  | 13 | 2.551885 | 0.002376 | 0.0147   |
| 2.6   | 100    | 91.9893  | 35122 | 21 | 0.266594 | 0.002376 | 0.01454  |
| 96    | 100    | 37.3044  | 12545 | 45 | 0.000522 | 0.002376 | 0.01494  |
| 27.7  | 100    | 26.116   | 7785  | 32 | 0.006673 | 0.002376 | 0.01423  |
| 73    | 100    | 31.3605  | 11864 | 46 | 0.000768 | 0.002543 | 0.01582  |
| 80.5  | 100    | 14.2272  | 4039  | 27 | 0.083708 | 0.002543 | 0.01571  |
| 59.4  | 100    | 71.3089  | 26406 | 41 | 0.001052 | 0.002777 | 0.01705  |
| 44.6  | 100    | 15.4119  | 4766  | 41 | 0.002719 | 0.002843 | 0.01907  |
| 51.8  | 100    | 23.6676  | 7651  | 9  | 3.971502 | 0.003096 | 0.01996  |
| 31.6  | 18.825 | 22.0127  | 7965  | 26 | 0.121052 | 0.003674 | 0.02552  |
| 222   | 81.203 | 36.785   | 12335 | 45 | 0.000489 | 0.003674 | 0.02565  |
| 20.6  | 100    | 25.6502  | 8323  | 33 | 0.021662 | 0.003674 | 0.02646  |
| 20.6  | 100    | 25.6502  | 8323  | 33 | 0.021662 | 0.003674 | 0.02646  |
| 30.4  | 26.111 | 23.0238  | 8403  | 22 | 0.264811 | 0.003736 | 0.02784  |
| 31.7  | 100    | 17.2974  | 5747  | 32 | 0.016649 | 0.004049 | 0.02914  |
| 11.5  | 100    | 70.7893  | 25925 | 35 | 0.01484  | 0.004124 | 0.02923  |
| 49.5  | 49.96  | 23.6719  | 8681  | 28 | 0.072342 | 0.004192 | 0.03039  |
| 11.6  | 100    | 73.3772  | 27190 | 34 | 0.005367 | 0.004192 | 0.02997  |
| 7.6   | 100    | 57.9774  | 20770 | 16 | 0.972495 | 0.004643 | 0.03274  |
| 6.4   | 100    | 46.5537  | 18271 | 38 | 0.006454 | 0.00496  | 0.03436  |
| 3.7   | 100    | 77.503   | 28678 | 25 | 0.135006 | 0.00496  | 0.03457  |
| 7.6   | 100    | 85.8491  | 32466 | 21 | 0.273564 | 0.005031 | 0.03518  |
| 9.3   | 100    | 65.772   | 23996 | 23 | 0.184887 | 0.005271 | 0.03572  |
| 157.8 | 4.236  | 71.8116  | 26606 | 45 | 0.000406 | 0.005325 | 0.03704  |
| 1.6   | 100    | 135.6742 | 52831 | 21 | 0.398951 | 0.005478 | 0.03784  |
| 33.4  | 100    | 28.0088  | 8441  | 14 | 0.394751 | 0.005618 | 0.03889  |
| 41.2  | 23.166 | 22.5163  | 8180  | 21 | 0.298899 | 0.005618 | 0.03878  |
| 10.7  | 100    | 74.0356  | 27482 | 32 | 0.024077 | 0.005687 | 0.03969  |
| 3.9   | 100    | 26.7276  | 9980  | 27 | 0.077907 | 0.006069 | 0.0455   |
| 0.4   | 100    | 37.6111  | 12664 | 41 | 0.002347 | 0.006222 | 0.04601  |
| 55.2  | 100    | 24.1775  | 8897  | 26 | 0.11857  | 0.006222 | 0.04602  |
| 19.1  | 100    | 58.7608  | 23513 | 27 | 0.075828 | 0.006654 | 0.04855  |
| 3.6   | 100    | 100.3246 | 38695 | 28 | 0.064609 | 0.006926 | 0.05004  |
| 7.8   | 100    | 87.599   | 33232 | 22 | 0.218236 | 0.007423 | 0.05394  |
| 22.5  | 100    | 46.2227  | 16103 | 15 | 0.89429  | 0.007785 | 0.05557  |
| 80.1  | 100    | 37.8133  | 12744 | 40 | 0.001675 | 0.0085   | 0.06349  |
| 154.8 | 8.579  | 45.7503  | 17927 | 23 | 0.209234 | 0.008962 | 0.06749  |
| 2.9   | 100    | 88.5385  | 33652 | 19 | 0.44588  | 0.009514 | 0.07398  |
| 17.5  | 49.677 | 89.4484  | 33377 | 62 | 2.59E-05 | 0        | 0.000503 |
| 5.1   | 100    | 88.9483  | 33190 | 48 | 0.000627 | 0        | 0.000804 |
| 24.7  | 7.996  | 92.5222  | 34558 | 72 | 3.07E-06 | 0        | 1.06E-07 |
| 10.4  | 100    | 92.6399  | 34599 | 73 | 2.7E-06  | 0        | 1.81E-06 |
| 11.8  | 100    | 93.0256  | 34755 | 55 | 0.000151 | 0        | 4.62E-06 |
| 5.5   | 100    | 69.2819  | 25597 | 50 | 0.000422 | 0        | 7.57E-05 |
| 79.5  | 53.89  | 22.7521  | 7297  | 31 | 0.019157 | 0        | 5.56E-05 |
| 61.6  | 100    | 22.3285  | 7141  | 58 | 6.38E-05 | 0        | 1.23E-05 |

|       |        |          |       |     |          |   |          |
|-------|--------|----------|-------|-----|----------|---|----------|
| 39.3  | 100    | 22.2497  | 7111  | 36  | 0.005525 | 0 | 0.000068 |
| 17.2  | 100    | 17.7756  | 5368  | 56  | 7.76E-05 | 0 | 0.000356 |
| 17.2  | 100    | 17.7756  | 5368  | 56  | 7.75E-05 | 0 | 0.000356 |
| 41.8  | 100    | 43.3171  | 13694 | 28  | 0.068622 | 0 | 0.000288 |
| 126.1 | 5.678  | 43.8223  | 13886 | 30  | 0.043603 | 0 | 0.000159 |
| 162.8 | 20.081 | 22.1344  | 7069  | 60  | 4.02E-05 | 0 | 4.86E-06 |
| 111.2 | 19.087 | 22.0922  | 7055  | 71  | 3.51E-06 | 0 | 1.45E-06 |
| 34.3  | 100    | 21.8478  | 6965  | 52  | 0.000142 | 0 | 0.001299 |
| 87.6  | 2.447  | 21.7453  | 6925  | 29  | 0.029809 | 0 | 0.000263 |
| 76.5  | 100    | 19.7959  | 6188  | 23  | 0.045167 | 0 | 0.000431 |
| 129.9 | 15.062 | 19.2936  | 6001  | 26  | 0.023488 | 0 | 7.41E-05 |
| 208.3 | 87.434 | 18.7934  | 5800  | 21  | 0.075708 | 0 | 0.000208 |
| 243.6 | 28.487 | 42.4145  | 14640 | 37  | 0.011814 | 0 | 0.000343 |
| 36.4  | 100    | 44.326   | 14077 | 31  | 0.035477 | 0 | 0.000174 |
| 5.6   | 100    | 73.2723  | 25540 | 39  | 0.004666 | 0 | 0.001368 |
| 14.8  | 100    | 73.1416  | 25487 | 71  | 3.21E-06 | 0 | 2.65E-07 |
| 0.5   | 100    | 108.1019 | 44420 | 35  | 0.013374 | 0 | 0.000805 |
| 3.5   | 100    | 107.5922 | 44216 | 75  | 1.3E-06  | 0 | 5.36E-08 |
| 16.2  | 26.209 | 107.085  | 44005 | 113 | 1.93E-10 | 0 | 2.4E-12  |
| 40    | 16.519 | 73.6465  | 25702 | 82  | 2.37E-07 | 0 | 2.82E-11 |
| 15.5  | 90.855 | 73.778   | 25761 | 59  | 4.55E-05 | 0 | 6.79E-07 |
| 0.4   | 100    | 105.5296 | 43330 | 48  | 0.000448 | 0 | 0.000493 |
| 33.2  | 100    | 74.1555  | 25926 | 39  | 0.005138 | 0 | 1.23E-06 |
| 24.5  | 100    | 74.6586  | 26141 | 38  | 0.006064 | 0 | 0.001062 |
| 10.4  | 56.099 | 96.2292  | 39471 | 83  | 2.16E-07 | 0 | 7.33E-09 |
| 14.3  | 67.692 | 95.7568  | 39258 | 73  | 2.14E-06 | 0 | 5.44E-07 |
| 9.2   | 22.101 | 95.719   | 39240 | 79  | 4.99E-07 | 0 | 4.77E-08 |
| 84.3  | 35.261 | 58.1025  | 21294 | 53  | 0.000189 | 0 | 2.75E-05 |
| 36.4  | 3.871  | 57.914   | 21222 | 80  | 4.15E-07 | 0 | 3.52E-06 |
| 65.6  | 89.412 | 57.5984  | 21100 | 40  | 0.004111 | 0 | 0.000384 |
| 100.9 | 8.646  | 69.7615  | 24091 | 52  | 0.000119 | 0 | 0.00029  |
| 36.9  | 81.826 | 69.7938  | 24104 | 52  | 0.000114 | 0 | 0.000192 |
| 32.3  | 100    | 70.28    | 24306 | 27  | 0.036053 | 0 | 0.001142 |
| 2.4   | 100    | 140.7872 | 57606 | 89  | 4.07E-08 | 0 | 2.52E-07 |
| 16.5  | 100    | 17.8829  | 5721  | 61  | 3.04E-05 | 0 | 0.000145 |
| 16.5  | 100    | 17.8829  | 5721  | 61  | 3.02E-05 | 0 | 0.000144 |
| 123.1 | 100    | 17.8515  | 5706  | 40  | 0.003319 | 0 | 0.000803 |
| 123.1 | 100    | 17.8515  | 5706  | 42  | 0.002382 | 0 | 0.000401 |
| 38.6  | 100    | 23.0781  | 7862  | 30  | 0.044842 | 0 | 0.000548 |
| 114.4 | 34.271 | 22.5397  | 7651  | 56  | 9.01E-05 | 0 | 1.78E-06 |
| 49.6  | 100    | 20.6172  | 5964  | 22  | 0.06278  | 0 | 0.000427 |
| 1.4   | 100    | 87.1365  | 30583 | 39  | 0.005578 | 0 | 0.000686 |
| 15.5  | 100    | 88.5426  | 31155 | 38  | 0.008029 | 0 | 6.8E-05  |
| 12.9  | 100    | 88.1476  | 30997 | 58  | 6.66E-05 | 0 | 1.41E-06 |
| 30.8  | 37.131 | 88.0386  | 30955 | 58  | 7.7E-05  | 0 | 4.37E-08 |
| 24.9  | 100    | 87.7642  | 30842 | 58  | 7.72E-05 | 0 | 1.26E-07 |
| 41.7  | 92.598 | 87.6437  | 30790 | 69  | 5.26E-06 | 0 | 1.1E-09  |
| 32.2  | 20.547 | 87.5365  | 30745 | 59  | 5.65E-05 | 0 | 1.09E-07 |
| 8.2   | 100    | 87.2058  | 30612 | 41  | 0.002964 | 0 | 7.05E-05 |
| 2.6   | 100    | 80.2434  | 29776 | 33  | 0.022043 | 0 | 0.000905 |
| 39.9  | 100    | 73.7118  | 27135 | 62  | 1.73E-05 | 0 | 0.000261 |
| 63.1  | 16.635 | 89.9985  | 33802 | 69  | 4.39E-06 | 0 | 6.9E-07  |

|       |        |          |       |     |          |          |          |
|-------|--------|----------|-------|-----|----------|----------|----------|
| 94.8  | 7.893  | 141.0456 | 52570 | 81  | 2.25E-07 | 0        | 6.35E-08 |
| 1.1   | 100    | 81.5512  | 30292 | 33  | 0.022867 | 0        | 0.000364 |
| 5.4   | 100    | 81.0441  | 30096 | 64  | 1.99E-05 | 0        | 4.83E-06 |
| 16.4  | 100    | 90.5044  | 34018 | 34  | 0.013257 | 0        | 0.001197 |
| 10.8  | 100    | 26.6111  | 8007  | 38  | 0.007353 | 0        | 0.000108 |
| 20.9  | 58.355 | 140.4896 | 55205 | 77  | 5.32E-07 | 0        | 1.47E-06 |
| 18.8  | 31.32  | 140.4881 | 55204 | 66  | 6.34E-06 | 0        | 4.29E-09 |
| 3     | 100    | 113.4551 | 42397 | 63  | 9.01E-06 | 0        | 0.000732 |
| 50.5  | 100    | 140.6412 | 54213 | 59  | 4.52E-05 | 0        | 2.35E-10 |
| 49.1  | 38.968 | 140.6271 | 54206 | 58  | 5.43E-05 | 0        | 8.2E-11  |
| 236.4 | 88.491 | 140.4086 | 54095 | 82  | 2.75E-07 | 0        | 1.2E-06  |
| 45.6  | 100    | 62.4079  | 22596 | 28  | 0.074036 | 0        | 0.000155 |
| 12.7  | 24.142 | 130.5323 | 49794 | 41  | 0.002966 | 0        | 0.000348 |
| 35.3  | 23.114 | 130.4632 | 49766 | 83  | 1.96E-07 | 0        | 7.98E-08 |
| 16.8  | 100    | 130.9661 | 49972 | 58  | 6.32E-05 | 0        | 2.41E-05 |
| 55.8  | 9.899  | 62.91    | 22811 | 61  | 3.14E-05 | 0        | 2.45E-06 |
| 2     | 100    | 64.5718  | 23500 | 47  | 0.00077  | 0        | 0.000202 |
| 17.1  | 100    | 64.3943  | 23428 | 44  | 0.001585 | 0        | 1.72E-05 |
| 22.8  | 100    | 118.7404 | 44704 | 44  | 0.000956 | 0        | 8.38E-06 |
| 20    | 100    | 65.582   | 23916 | 46  | 0.000994 | 0        | 3.5E-05  |
| 16.9  | 100    | 65.0646  | 23698 | 58  | 6.92E-05 | 0        | 1.45E-06 |
| 13.6  | 39.766 | 62.9503  | 22828 | 92  | 2.53E-08 | 0        | 2.99E-08 |
| 4.6   | 100    | 64.0699  | 23291 | 49  | 0.000434 | 0        | 3.4E-05  |
| 17.8  | 100    | 63.8931  | 23219 | 43  | 0.001668 | 0        | 1.75E-05 |
| 37.8  | 61.593 | 63.4168  | 23030 | 63  | 2.02E-05 | 0        | 6.27E-07 |
| 43.5  | 100    | 63.9191  | 23230 | 61  | 3E-05    | 0        | 1.12E-06 |
| 17    | 100    | 130.0251 | 49564 | 31  | 0.032867 | 0        | 0.000675 |
| 30.9  | 17.311 | 121.7689 | 46029 | 60  | 1.09E-05 | 0        | 5.14E-05 |
| 13.9  | 100    | 53.3685  | 18951 | 50  | 0.000387 | 0        | 0.000492 |
| 21.1  | 100    | 52.8615  | 18747 | 63  | 2.05E-05 | 0        | 4.07E-05 |
| 18.8  | 63.038 | 138.2512 | 53096 | 75  | 7.35E-07 | 0        | 1.23E-11 |
| 14.4  | 44.263 | 138.1623 | 53053 | 95  | 8.86E-09 | 0        | 1.02E-14 |
| 11.5  | 35.619 | 114.6824 | 42938 | 50  | 0.000381 | 0        | 0.000273 |
| 20.5  | 100    | 114.7191 | 42956 | 50  | 0.000353 | 0        | 0.000107 |
| 20.1  | 100    | 67.9811  | 24906 | 30  | 0.038211 | 0        | 0.000815 |
| 17.6  | 100    | 66.5917  | 24342 | 34  | 0.017832 | 0        | 0.001129 |
| 0.4   | 100    | 116.9927 | 43944 | 34  | 0.009563 | 0        | 0.000649 |
| 156   | 66.268 | 141.1879 | 54548 | 50  | 0.00016  | 0        | 1E-08    |
| 20.8  | 10.604 | 141.2723 | 54602 | 103 | 2E-09    | 0        | 1.73E-12 |
| 15.6  | 62.666 | 141.2771 | 54606 | 97  | 7.32E-09 | 0        | 1.21E-11 |
| 44.2  | 100    | 26.5592  | 9919  | 28  | 0.075074 | 0        | 0.000252 |
| 2.9   | 6.776  | 141.7624 | 54876 | 83  | 1.86E-07 | 0        | 2.38E-09 |
| 52.9  | 100    | 33.379   | 11474 | 43  | 0.001054 | 0        | 0.000337 |
| 10.9  | 7.93   | 141.7617 | 54875 | 90  | 3.53E-08 | 0        | 1.17E-10 |
| 3.7   | 100    | 138.8173 | 53344 | 35  | 0.008752 | 0.000141 | 0.001632 |
| 153.4 | 9.852  | 73.2078  | 26924 | 50  | 0.000271 | 0.000141 | 0.001812 |
| 11.6  | 100    | 75.5801  | 26031 | 29  | 0.026839 | 0.000141 | 0.001642 |
| 35.1  | 100    | 22.0366  | 7454  | 25  | 0.140976 | 0.000141 | 0.001597 |
| 100.5 | 100    | 17.7119  | 5637  | 18  | 0.178993 | 0.000141 | 0.001619 |
| 57.5  | 100    | 17.7477  | 5355  | 36  | 0.009279 | 0.000141 | 0.001694 |
| 122.9 | 100    | 21.8269  | 6956  | 19  | 0.494798 | 0.000141 | 0.00179  |
| 9.6   | 100    | 131.4727 | 50186 | 46  | 0.00115  | 0.000273 | 0.001877 |

|       |        |          |       |    |          |          |          |
|-------|--------|----------|-------|----|----------|----------|----------|
| 16.5  | 53.179 | 54.4053  | 17927 | 32 | 0.02392  | 0.000273 | 0.001984 |
| 13.3  | 100    | 37.45    | 11615 | 38 | 0.006012 | 0.000273 | 0.00203  |
| 5.7   | 100    | 70.0152  | 25879 | 58 | 4.78E-05 | 0.000273 | 0.001837 |
| 16.9  | 12.255 | 90.0161  | 33810 | 38 | 0.005504 | 0.000407 | 0.002139 |
| 89    | 100    | 71.7869  | 26596 | 37 | 0.005417 | 0.00065  | 0.002778 |
| 57.5  | 100    | 17.7477  | 5355  | 36 | 0.009279 | 0.00065  | 0.002769 |
| 4.8   | 100    | 109.4993 | 39609 | 30 | 0.039336 | 0.000758 | 0.003107 |
| 30.2  | 100    | 46.2185  | 14776 | 21 | 0.352059 | 0.000758 | 0.003    |
| 28.8  | 100    | 18.1238  | 5522  | 21 | 0.19414  | 0.000758 | 0.003079 |
| 58.3  | 100    | 52.9033  | 18762 | 43 | 0.002235 | 0.000758 | 0.003101 |
| 2     | 5.894  | 141.0463 | 52571 | 38 | 0.004027 | 0.000758 | 0.00307  |
| 35.5  | 49.716 | 36.1309  | 12081 | 49 | 0.00045  | 0.000758 | 0.002835 |
| 21.5  | 100    | 65.8674  | 22500 | 32 | 0.028931 | 0.000868 | 0.003314 |
| 22.7  | 100    | 68.6016  | 23612 | 26 | 0.050385 | 0.000868 | 0.003428 |
| 16.4  | 100    | 85.3562  | 30668 | 31 | 0.03221  | 0.000868 | 0.003276 |
| 60.6  | 100    | 26.4428  | 7952  | 30 | 0.041184 | 0.000951 | 0.004198 |
| 0.4   | 100    | 89.0955  | 33244 | 34 | 0.016274 | 0.000951 | 0.004121 |
| 0     | 100    | 15.2858  | 4267  | 53 | 0.000127 | 0.000951 | 0.004402 |
| 21.5  | 100    | 32.1244  | 11346 | 31 | 0.049367 | 0.000951 | 0.003879 |
| 2.6   | 100    | 58.4194  | 21408 | 41 | 0.00375  | 0.000951 | 0.004015 |
| 11.2  | 100    | 114.2057 | 42734 | 39 | 0.005039 | 0.000951 | 0.004438 |
| 8     | 100    | 69.5077  | 25685 | 47 | 0.000711 | 0.001022 | 0.004733 |
| 82.8  | 100    | 21.3058  | 6755  | 17 | 0.41199  | 0.001022 | 0.005449 |
| 42.1  | 100    | 18.6983  | 5762  | 31 | 0.030525 | 0.001022 | 0.005855 |
| 7.6   | 100    | 88.0043  | 35980 | 34 | 0.01685  | 0.001022 | 0.005146 |
| 3.8   | 100    | 96.4619  | 36120 | 21 | 0.336081 | 0.001022 | 0.00521  |
| 322.1 | 100    | 15.1072  | 4608  | 22 | 0.05513  | 0.001114 | 0.005991 |
| 2.7   | 100    | 63.4556  | 23045 | 38 | 0.007611 | 0.001114 | 0.00636  |
| 25.1  | 100    | 34.841   | 10705 | 23 | 0.187094 | 0.00121  | 0.006862 |
| 15.3  | 100    | 57.9504  | 21211 | 30 | 0.039003 | 0.001308 | 0.007181 |
| 127.3 | 100    | 35.7068  | 11918 | 31 | 0.031523 | 0.001308 | 0.007045 |
| 13    | 100    | 89.0462  | 31372 | 25 | 0.162647 | 0.00141  | 0.007318 |
| 34.1  | 100    | 15.764   | 4437  | 10 | 2.689513 | 0.00141  | 0.007447 |
| 18.3  | 100    | 66.3796  | 22715 | 22 | 0.266345 | 0.001498 | 0.008042 |
| 15.7  | 100    | 15.3801  | 4521  | 55 | 8.83E-05 | 0.001498 | 0.007492 |
| 1.7   | 100    | 89.5096  | 33593 | 29 | 0.049126 | 0.001498 | 0.007525 |
| 11.9  | 100    | 121.2659 | 45801 | 33 | 0.00476  | 0.001498 | 0.007486 |
| 52    | 100    | 20.9076  | 6608  | 12 | 0.551339 | 0.001576 | 0.008348 |
| 155   | 1.601  | 71.2852  | 26397 | 49 | 0.000314 | 0.001677 | 0.008878 |
| 13.2  | 55.159 | 73.2092  | 26925 | 41 | 0.002166 | 0.001677 | 0.008883 |
| 4.5   | 100    | 107.4457 | 44159 | 32 | 0.024029 | 0.001758 | 0.009557 |
| 36.8  | 100    | 43.891   | 13913 | 36 | 0.010619 | 0.001758 | 0.009132 |
| 1.5   | 100    | 15.4092  | 4214  | 51 | 0.000241 | 0.002012 | 0.01038  |
| 36.8  | 100    | 117.6864 | 43011 | 22 | 0.25276  | 0.002012 | 0.0106   |
| 259   | 81.734 | 41.9076  | 14468 | 26 | 0.126667 | 0.002012 | 0.01126  |
| 34.5  | 100    | 47.2802  | 15186 | 23 | 0.125608 | 0.002079 | 0.01166  |
| 211.7 | 41.645 | 17.5695  | 5271  | 22 | 0.261146 | 0.002079 | 0.012    |
| 25.8  | 100    | 42.1174  | 14538 | 24 | 0.227169 | 0.002079 | 0.01163  |
| 11.8  | 100    | 48.6265  | 19158 | 44 | 0.000344 | 0.002257 | 0.0124   |
| 21.4  | 100    | 70.7078  | 26055 | 17 | 0.908845 | 0.002315 | 0.01376  |
| 16.8  | 100    | 21.2414  | 6728  | 16 | 0.534596 | 0.002315 | 0.01316  |
| 21.3  | 100    | 137.6783 | 52833 | 19 | 0.343222 | 0.002315 | 0.01375  |

|       |        |          |       |    |          |          |          |
|-------|--------|----------|-------|----|----------|----------|----------|
| 7.3   | 100    | 86.7407  | 32409 | 26 | 0.095124 | 0.002376 | 0.01431  |
| 29.6  | 100    | 17.6099  | 5095  | 24 | 0.173478 | 0.002376 | 0.01422  |
| 2.7   | 100    | 87.2629  | 30636 | 24 | 0.165726 | 0.002376 | 0.01464  |
| 8.6   | 100    | 129.9628 | 49536 | 29 | 0.056855 | 0.002376 | 0.01483  |
| 34.8  | 100    | 21.6507  | 6309  | 26 | 0.092535 | 0.002636 | 0.01638  |
| 31.6  | 100    | 72.2881  | 26786 | 37 | 0.005624 | 0.002636 | 0.01639  |
| 27.7  | 100    | 69.445   | 25525 | 12 | 2.446154 | 0.002777 | 0.0171   |
| 10.8  | 100    | 54.2836  | 17882 | 23 | 0.192592 | 0.002777 | 0.01802  |
| 12    | 100    | 66.0309  | 24020 | 22 | 0.30267  | 0.002777 | 0.01693  |
| 19.2  | 100    | 30.5749  | 11537 | 36 | 0.00813  | 0.002843 | 0.0193   |
| 8.7   | 100    | 58.2725  | 19475 | 35 | 0.003767 | 0.003178 | 0.02056  |
| 109.5 | 100    | 69.2582  | 23887 | 13 | 1.02873  | 0.00337  | 0.02215  |
| 20.6  | 100    | 31.2914  | 11021 | 35 | 0.010668 | 0.00337  | 0.02406  |
| 24    | 100    | 39.0569  | 12198 | 26 | 0.095117 | 0.00337  | 0.02293  |
| 3.4   | 100    | 89.9614  | 33583 | 30 | 0.031489 | 0.003456 | 0.02435  |
| 2.7   | 100    | 121.3352 | 45833 | 25 | 0.028684 | 0.003533 | 0.02446  |
| 3.7   | 100    | 88.9143  | 32148 | 22 | 0.048323 | 0.003674 | 0.02514  |
| 53.6  | 100    | 18.1459  | 5532  | 21 | 0.168598 | 0.003736 | 0.02753  |
| 0.7   | 100    | 115.2442 | 43177 | 20 | 0.352072 | 0.00382  | 0.02788  |
| 11.1  | 100    | 48.1168  | 18921 | 33 | 0.004527 | 0.003892 | 0.02865  |
| 26.6  | 100    | 22.5205  | 6600  | 18 | 0.326853 | 0.003892 | 0.02803  |
| 29.1  | 100    | 69.9789  | 25863 | 35 | 0.007665 | 0.004049 | 0.02909  |
| 1.5   | 100    | 82.0564  | 30494 | 22 | 0.314499 | 0.004266 | 0.03074  |
| 39    | 100    | 22.3162  | 7136  | 16 | 0.489362 | 0.004344 | 0.03121  |
| 89.5  | 100    | 16.668   | 5414  | 41 | 0.000617 | 0.004424 | 0.0317   |
| 48.6  | 100    | 46.9746  | 15064 | 16 | 1.02558  | 0.004424 | 0.03174  |
| 73.5  | 100    | 25.8542  | 8468  | 19 | 0.488009 | 0.004643 | 0.03361  |
| 23.6  | 100    | 61.3383  | 20665 | 14 | 0.863012 | 0.004643 | 0.03304  |
| 130.5 | 14.555 | 21.8105  | 6949  | 17 | 0.463157 | 0.005271 | 0.03609  |
| 77.6  | 100    | 17.6839  | 4989  | 17 | 0.865452 | 0.005478 | 0.03772  |
| 62.1  | 100    | 59.9802  | 21975 | 23 | 0.195571 | 0.005618 | 0.03837  |
| 8.3   | 100    | 15.368   | 4342  | 41 | 0.002164 | 0.00573  | 0.04114  |
| 35.5  | 100    | 51.3791  | 16694 | 17 | 0.494369 | 0.005792 | 0.04247  |
| 21.7  | 100    | 19.9443  | 5865  | 10 | 0.997294 | 0.006069 | 0.04556  |
| 73.5  | 100    | 20.4032  | 6411  | 10 | 0.897063 | 0.006428 | 0.04755  |
| 30.4  | 100    | 17.5597  | 5267  | 30 | 0.039518 | 0.006926 | 0.05038  |
| 20.6  | 100    | 66.091   | 24133 | 21 | 0.352327 | 0.007423 | 0.05381  |
| 31.6  | 100    | 60.3358  | 20268 | 18 | 0.398305 | 0.007785 | 0.05556  |
| 13.2  | 100    | 36.3753  | 11231 | 27 | 0.083443 | 0.007836 | 0.0568   |
| 1.7   | 100    | 131.541  | 50216 | 14 | 1.430973 | 0.007836 | 0.05608  |
| 55.8  | 100    | 25.3488  | 8276  | 20 | 0.436907 | 0.007969 | 0.05831  |
| 9.4   | 100    | 19.6317  | 5642  | 18 | 0.503531 | 0.008034 | 0.05907  |
| 173.1 | 46.154 | 17.7611  | 5662  | 16 | 0.871748 | 0.0081   | 0.05966  |
| 11.2  | 100    | 57.7651  | 19269 | 33 | 0.005197 | 0.008746 | 0.06655  |
| 42.6  | 47.252 | 15.4966  | 4818  | 40 | 0.00296  | 0.008962 | 0.0675   |
| 3.6   | 100    | 96.261   | 39485 | 21 | 0.321524 | 0.009498 | 0.07211  |
| 1     | 100    | 57.7663  | 21142 | 26 | 0.100383 | 0.009514 | 0.07414  |
| 6.8   | 100    | 74.2196  | 27330 | 27 | 0.052378 | 0.009514 | 0.07629  |
| 32.5  | 100    | 70.7801  | 26202 | 28 | 0.041027 | 0.009985 | 0.08304  |
| 57.2  | 29.714 | 85.5379  | 31816 | 69 | 4.16E-06 | 0        | 2.6E-07  |
| 25.2  | 100    | 85.6462  | 31857 | 47 | 0.000657 | 0        | 0.000342 |
| 4.6   | 100    | 85.9594  | 31974 | 41 | 0.001839 | 0        | 0.001055 |



|       |        |          |       |     |          |   |          |
|-------|--------|----------|-------|-----|----------|---|----------|
| 11.7  | 100    | 87.4749  | 32592 | 58  | 4.22E-05 | 0 | 8.56E-06 |
| 40.2  | 33.726 | 86.9662  | 32389 | 58  | 3.92E-05 | 0 | 1.51E-07 |
| 6     | 100    | 86.9039  | 32362 | 41  | 0.002205 | 0 | 0.000117 |
| 31.5  | 89.897 | 86.4611  | 32174 | 58  | 3.84E-05 | 0 | 2.58E-08 |
| 26.7  | 11.444 | 60.3512  | 22112 | 42  | 0.00132  | 0 | 1.68E-06 |
| 87    | 100    | 26.1696  | 8589  | 40  | 0.003461 | 0 | 0.000161 |
| 36.6  | 100    | 25.7679  | 8435  | 57  | 6.46E-05 | 0 | 0.000198 |
| 39.5  | 100    | 25.1012  | 8187  | 31  | 0.022878 | 0 | 9.81E-05 |
| 130.8 | 12.566 | 25.6088  | 8373  | 36  | 0.007898 | 0 | 0.000924 |
| 17.7  | 100    | 111.5777 | 41883 | 46  | 0.0008   | 0 | 4.5E-06  |
| 13.1  | 25.314 | 111.4873 | 41852 | 80  | 3.73E-07 | 0 | 8.27E-09 |
| 0.3   | 100    | 110.9841 | 41650 | 26  | 0.083143 | 0 | 0.0009   |
| 22.2  | 100    | 120.4439 | 49482 | 71  | 1.36E-06 | 0 | 1.33E-08 |
| 7     | 100    | 119.9376 | 49274 | 67  | 3.15E-06 | 0 | 5.01E-08 |
| 5.1   | 100    | 55.0915  | 20122 | 51  | 0.000111 | 0 | 0.001441 |
| 9.7   | 100    | 54.659   | 19940 | 46  | 0.001036 | 0 | 0.001457 |
| 9.5   | 100    | 54.6051  | 19919 | 46  | 0.001031 | 0 | 0.001173 |
| 53.7  | 100    | 58.0142  | 21260 | 30  | 0.046491 | 0 | 1.54E-05 |
| 13.7  | 11.943 | 57.9147  | 21223 | 65  | 1.36E-05 | 0 | 5.27E-06 |
| 10.2  | 100    | 57.5112  | 21067 | 30  | 0.044868 | 0 | 0.000358 |
| 7.8   | 100    | 139.9464 | 57206 | 40  | 0.004163 | 0 | 1.19E-05 |
| 18.4  | 100    | 138.8769 | 56783 | 85  | 1.14E-07 | 0 | 2.15E-10 |
| 6.6   | 100    | 138.5156 | 56646 | 103 | 1.95E-09 | 0 | 2.31E-11 |
| 20.1  | 100    | 138.3665 | 56592 | 92  | 2.57E-08 | 0 | 2.59E-11 |
| 33.7  | 13.353 | 67.8651  | 23321 | 73  | 1.15E-06 | 0 | 3.4E-07  |
| 21.4  | 100    | 67.3616  | 23127 | 35  | 0.006403 | 0 | 0.000268 |
| 3.9   | 100    | 67.514   | 23184 | 33  | 0.01203  | 0 | 0.000201 |
| 89.1  | 12.343 | 52.24    | 17015 | 33  | 0.013887 | 0 | 0.000171 |
| 29.5  | 100    | 51.7378  | 16826 | 23  | 0.126132 | 0 | 0.000273 |
| 17.4  | 100    | 52.3246  | 17044 | 53  | 0.000141 | 0 | 0.000383 |
| 31.8  | 100    | 52.7431  | 17204 | 33  | 0.014657 | 0 | 3.39E-05 |
| 29.9  | 100    | 27.3345  | 8217  | 34  | 0.013467 | 0 | 0.000255 |
| 12.1  | 100    | 90.8136  | 32078 | 47  | 0.000928 | 0 | 0.00049  |
| 70.1  | 78.019 | 91.3167  | 32293 | 65  | 1.46E-05 | 0 | 2.62E-05 |
| 81.7  | 74.659 | 91.3184  | 32294 | 58  | 6.84E-05 | 0 | 7.69E-06 |
| 46.9  | 50.838 | 77.9516  | 28886 | 56  | 4.92E-05 | 0 | 1.58E-05 |
| 11    | 100    | 57.0545  | 20385 | 42  | 0.002141 | 0 | 0.000747 |
| 20.8  | 100    | 56.9858  | 20358 | 45  | 0.001032 | 0 | 0.001147 |
| 11.8  | 100    | 129.8479 | 50604 | 47  | 0.000708 | 0 | 4.05E-05 |
| 10.3  | 100    | 117.5527 | 45419 | 100 | 2.59E-09 | 0 | 6.09E-11 |
| 6.6   | 100    | 109.5548 | 42530 | 51  | 1.94E-05 | 0 | 4.95E-05 |
| 2.2   | 100    | 87.0724  | 33006 | 36  | 0.001352 | 0 | 0.000106 |
| 6.8   | 100    | 93.3887  | 35712 | 29  | 0.025923 | 0 | 0.000729 |
| 9.2   | 100    | 93.4197  | 35727 | 31  | 0.016979 | 0 | 0.000106 |
| 14.7  | 100    | 105.3935 | 39063 | 48  | 0.000665 | 0 | 5.09E-07 |
| 6.2   | 100    | 84.7807  | 32012 | 41  | 0.001493 | 0 | 9.84E-07 |
| 165.9 | 100    | 25.1777  | 7914  | 26  | 0.039786 | 0 | 0.001252 |
| 17.6  | 100    | 81.1357  | 30454 | 47  | 0.000588 | 0 | 0.00096  |
| 43.4  | 32.618 | 80.864   | 30342 | 60  | 3.08E-05 | 0 | 5.75E-05 |
| 1.4   | 100    | 84.276   | 31789 | 41  | 0.001528 | 0 | 3.13E-05 |
| 61.1  | 9.744  | 45.9471  | 18010 | 38  | 0.00621  | 0 | 0.001126 |
| 38.6  | 62.098 | 45.8471  | 17968 | 48  | 0.000647 | 0 | 0.000164 |

|       |        |          |       |    |          |          |          |
|-------|--------|----------|-------|----|----------|----------|----------|
| 34.9  | 97.729 | 49.3897  | 19492 | 30 | 0.025675 | 0        | 0.000775 |
| 9.6   | 100    | 50.5822  | 18223 | 65 | 1.29E-06 | 0        | 0.000173 |
| 14.2  | 100    | 51.132   | 18443 | 43 | 0.000183 | 0        | 0.000653 |
| 40.8  | 22.499 | 55.8034  | 20186 | 47 | 0.000178 | 0        | 0.000196 |
| 33    | 100    | 56.3086  | 20375 | 49 | 0.000129 | 0        | 0.000286 |
| 14.6  | 100    | 17.2521  | 5351  | 48 | 0.000448 | 0        | 0.000612 |
| 41.8  | 100    | 17.4673  | 5436  | 44 | 0.001205 | 0        | 0.000279 |
| 8.9   | 100    | 64.2168  | 25865 | 80 | 3.41E-07 | 0        | 4.71E-08 |
| 22.8  | 100    | 52.4995  | 20844 | 35 | 0.006511 | 0        | 8.2E-08  |
| 110.1 | 100    | 18.0372  | 5425  | 44 | 0.001264 | 0        | 6.79E-06 |
| 13.5  | 100    | 72.3588  | 29394 | 47 | 0.000752 | 0        | 5.28E-06 |
| 19.1  | 100    | 16.9647  | 5228  | 35 | 0.009624 | 0.000141 | 0.00181  |
| 1.3   | 100    | 139.0203 | 56838 | 26 | 0.108464 | 0.000141 | 0.001587 |
| 95.3  | 43.203 | 79.2883  | 29944 | 53 | 0.000106 | 0.000141 | 0.00179  |
| 73.2  | 100    | 85.4497  | 31865 | 54 | 0.000133 | 0.000273 | 0.001944 |
| 61.1  | 100    | 13.0292  | 3591  | 25 | 0.09118  | 0.000273 | 0.001934 |
| 18.1  | 100    | 45.4114  | 17767 | 30 | 0.041399 | 0.000273 | 0.001994 |
| 49.1  | 33.419 | 48.9549  | 17728 | 49 | 0.000194 | 0.000407 | 0.002136 |
| 28.2  | 100    | 57.894   | 19180 | 40 | 0.004334 | 0.000525 | 0.002513 |
| 18.8  | 44.709 | 55.8842  | 20218 | 33 | 0.005114 | 0.000525 | 0.002339 |
| 8.7   | 100    | 79.2761  | 32294 | 49 | 0.000305 | 0.000525 | 0.002501 |
| 13.7  | 100    | 50.1429  | 17614 | 50 | 0.000123 | 0.000868 | 0.003254 |
| 5.2   | 100    | 64.8641  | 23845 | 33 | 0.01541  | 0.000951 | 0.003697 |
| 19.5  | 100    | 27.9725  | 9712  | 35 | 0.009431 | 0.000951 | 0.004237 |
| 6.8   | 100    | 18.0753  | 5438  | 44 | 0.001223 | 0.000951 | 0.004197 |
| 0.8   | 100    | 139.9769 | 57220 | 16 | 1.014699 | 0.000951 | 0.004495 |
| 20.2  | 100    | 26.5075  | 8722  | 43 | 0.001429 | 0.001022 | 0.00524  |
| 26.4  | 100    | 27.0929  | 8938  | 21 | 0.258102 | 0.001022 | 0.005016 |
| 42    | 100    | 74.2262  | 27568 | 38 | 0.004563 | 0.001022 | 0.00481  |
| 106.3 | 44.966 | 84.9436  | 31660 | 54 | 0.000132 | 0.001022 | 0.005604 |
| 10.9  | 100    | 44.945   | 17557 | 17 | 0.769042 | 0.001022 | 0.004676 |
| 1     | 100    | 49.9036  | 19711 | 24 | 0.098618 | 0.001022 | 0.005768 |
| 13.7  | 100    | 37.6552  | 14502 | 50 | 4.67E-05 | 0.001308 | 0.007013 |
| 82    | 76.997 | 33.0683  | 11251 | 20 | 0.171948 | 0.001308 | 0.007097 |
| 41.3  | 100    | 55.163   | 20151 | 41 | 0.003463 | 0.001308 | 0.007135 |
| 9.4   | 100    | 69.143   | 23495 | 32 | 0.024525 | 0.001498 | 0.007639 |
| 11    | 100    | 71.2427  | 24301 | 32 | 0.016079 | 0.001498 | 0.007527 |
| 11    | 100    | 71.2427  | 24301 | 32 | 0.016079 | 0.001498 | 0.007527 |
| 12.4  | 100    | 77.8068  | 28821 | 32 | 0.012337 | 0.001498 | 0.007862 |
| 30.9  | 100    | 48.7081  | 17627 | 23 | 0.071703 | 0.001758 | 0.009291 |
| 54.3  | 100    | 27.116   | 9371  | 29 | 0.03177  | 0.001758 | 0.009674 |
| 0     | 100    | 86.5675  | 32794 | 17 | 0.131454 | 0.001854 | 0.009852 |
| 15.7  | 100    | 67.5452  | 23197 | 29 | 0.044515 | 0.002012 | 0.01099  |
| 1.8   | 100    | 93.893   | 35941 | 17 | 0.399809 | 0.002012 | 0.0112   |
| 0.3   | 100    | 111.9946 | 42033 | 18 | 0.616347 | 0.002012 | 0.01032  |
| 6.1   | 100    | 80.6358  | 30241 | 32 | 0.021494 | 0.002012 | 0.01081  |
| 42.5  | 100    | 13.9284  | 3930  | 34 | 0.006114 | 0.002079 | 0.01142  |
| 16    | 100    | 31.8484  | 10471 | 23 | 0.084703 | 0.002079 | 0.0117   |
| 3.2   | 100    | 65.5951  | 24130 | 26 | 0.079365 | 0.002257 | 0.01281  |
| 63.4  | 100    | 19.4395  | 6409  | 17 | 0.630431 | 0.002315 | 0.01374  |
| 0     | 100    | 137.8596 | 56403 | 22 | 0.266023 | 0.002315 | 0.01354  |
| 10.8  | 100    | 111.0731 | 41688 | 16 | 0.895649 | 0.002315 | 0.01348  |

|       |        |          |       |    |          |          |          |
|-------|--------|----------|-------|----|----------|----------|----------|
| 12.2  | 100    | 18.2215  | 6234  | 48 | 0.000232 | 0.002315 | 0.01416  |
| 6.9   | 100    | 65.7893  | 23925 | 16 | 0.849037 | 0.002376 | 0.01484  |
| 11.1  | 100    | 50.2039  | 17640 | 41 | 0.001946 | 0.002376 | 0.01425  |
| 0     | 100    | 101.2428 | 37333 | 20 | 0.4005   | 0.002376 | 0.01454  |
| 7     | 100    | 14.8682  | 4428  | 40 | 0.001673 | 0.002376 | 0.01467  |
| 2.1   | 100    | 105.8933 | 39272 | 19 | 0.45257  | 0.002719 | 0.01669  |
| 11.4  | 100    | 67.9238  | 23344 | 38 | 0.003963 | 0.002719 | 0.01665  |
| 108.4 | 4.112  | 15.835   | 4734  | 14 | 1.143103 | 0.003178 | 0.02081  |
| 46.7  | 100    | 15.7133  | 4475  | 10 | 2.668992 | 0.004266 | 0.0311   |
| 2.7   | 100    | 50.0777  | 18035 | 23 | 0.016149 | 0.00573  | 0.0411   |
| 4.2   | 100    | 60.86    | 22305 | 18 | 0.353557 | 0.005943 | 0.0434   |
| 46.7  | 100    | 13.4283  | 3753  | 27 | 0.025399 | 0.007057 | 0.05252  |
| 0.9   | 100    | 120.0453 | 49321 | 15 | 0.532756 | 0.007636 | 0.05496  |
| 0     | 100    | 138.004  | 56457 | 13 | 2.077643 | 0.008997 | 0.06994  |
| 13.7  | 100    | 85.2846  | 32228 | 6  | 5.834798 | 0.00971  | 0.0775   |
| 3.3   | 100    | 84.3193  | 34355 | 14 | 1.428974 | 0.009764 | 0.07831  |
| 1.3   | 100    | 79.7979  | 29609 | 13 | 1.059095 | 0.009818 | 0.07916  |
| 2.8   | 100    | 86.6085  | 32235 | 17 | 0.57142  | 0.009914 | 0.08234  |
| 6.6   | 100    | 95.0567  | 35576 | 30 | 0.012594 | 0        | 0.001139 |
| 29.1  | 18.949 | 95.5632  | 35782 | 71 | 9.08E-07 | 0        | 8.33E-07 |
| 25.1  | 100    | 95.5954  | 35796 | 86 | 2.59E-08 | 0        | 1.63E-08 |
| 85.4  | 100    | 17.0566  | 5040  | 47 | 0.000288 | 0        | 3.8E-05  |
| 1.9   | 100    | 90.1069  | 36844 | 45 | 0.000765 | 0        | 0.000846 |
| 16    | 100    | 93.216   | 38185 | 66 | 5.54E-06 | 0        | 1.66E-05 |
| 48.1  | 68.675 | 17.4825  | 5527  | 38 | 0.005573 | 0        | 9.34E-05 |
| 205.9 | 96.849 | 17.1079  | 5342  | 51 | 0.000127 | 0        | 1.94E-05 |
| 19.5  | 100    | 25.5581  | 8813  | 48 | 0.000619 | 0        | 3.51E-06 |
| 73.8  | 100    | 30.953   | 10885 | 25 | 0.13164  | 0        | 0.000177 |
| 19.8  | 100    | 46.6442  | 16270 | 27 | 0.102859 | 0        | 0.000393 |
| 16.3  | 100    | 48.9419  | 15776 | 31 | 0.033444 | 0        | 0.001249 |
| 1.7   | 100    | 113.042  | 41032 | 43 | 0.001989 | 0        | 0.001316 |
| 55.6  | 55.235 | 113.3907 | 41181 | 73 | 1.8E-06  | 0        | 2.26E-07 |
| 4.1   | 100    | 71.8994  | 26360 | 45 | 0.000456 | 0        | 0.000978 |
| 28.2  | 100    | 53.76    | 19088 | 40 | 0.004602 | 0        | 0.00022  |
| 30    | 100    | 53.2549  | 18886 | 41 | 0.003201 | 0        | 3.4E-05  |
| 66.3  | 33.679 | 46.8648  | 16356 | 52 | 0.000271 | 0        | 5.91E-06 |
| 17    | 100    | 113.5001 | 43693 | 56 | 0.000112 | 0        | 3.78E-06 |
| 8.8   | 100    | 112.9917 | 43468 | 64 | 1.62E-05 | 0        | 5.45E-07 |
| 8.3   | 100    | 86.6756  | 32839 | 50 | 0.000222 | 0        | 0.000146 |
| 53.4  | 100    | 64.8004  | 23966 | 45 | 0.001157 | 0        | 0.000652 |
| 64.4  | 100    | 60.3939  | 21785 | 50 | 0.00026  | 0        | 1.14E-05 |
| 4.6   | 100    | 128.7787 | 49024 | 41 | 0.003371 | 0        | 0.000662 |
| 10.1  | 76.855 | 129.285  | 49251 | 65 | 1.4E-05  | 0        | 2.77E-06 |
| 57.6  | 13.082 | 81.5285  | 30607 | 45 | 0.001439 | 0        | 0.000126 |
| 60.3  | 66.719 | 51.0537  | 20212 | 53 | 0.000181 | 0        | 0.001022 |
| 14.3  | 92.689 | 70.4819  | 28570 | 55 | 8.09E-05 | 0        | 8.89E-08 |
| 2     | 52.696 | 141.0296 | 54448 | 37 | 0.009203 | 0        | 0.001125 |
| 4.4   | 57.041 | 70.9835  | 28797 | 40 | 0.002318 | 0        | 6.9E-06  |
| 82.9  | 26.96  | 61.8867  | 24877 | 35 | 0.013778 | 0        | 0.001094 |
| 48.8  | 65.566 | 62.2776  | 25055 | 37 | 0.002641 | 0        | 0.000584 |
| 25.9  | 40.495 | 73.5678  | 29917 | 51 | 0.00031  | 0        | 0.000336 |
| 44    | 79.054 | 73.5596  | 29913 | 77 | 7.65E-07 | 0        | 7.33E-07 |

|       |        |          |       |    |          |          |          |
|-------|--------|----------|-------|----|----------|----------|----------|
| 50.3  | 100    | 22.3405  | 8107  | 54 | 0.000167 | 0        | 5.68E-06 |
| 50.9  | 46.56  | 23.8506  | 8758  | 66 | 9.98E-06 | 0        | 3.14E-08 |
| 91.2  | 88.946 | 23.3421  | 8537  | 66 | 1.03E-05 | 0        | 1.52E-07 |
| 123.9 | 26.716 | 23.4725  | 8593  | 69 | 3.01E-06 | 0        | 1.97E-07 |
| 134.1 | 63.058 | 21.3286  | 7673  | 41 | 0.003399 | 0        | 2.35E-07 |
| 102.6 | 42.913 | 21.8358  | 7887  | 82 | 2.76E-07 | 0        | 3.43E-10 |
| 23.5  | 66.005 | 61.8893  | 22496 | 40 | 0.003899 | 0        | 1.9E-05  |
| 32    | 100    | 61.5921  | 22385 | 45 | 0.001262 | 0        | 3.59E-06 |
| 45.5  | 100    | 63.1071  | 22978 | 47 | 0.000773 | 0        | 2.05E-08 |
| 29.8  | 63.512 | 62.8951  | 22895 | 57 | 6.81E-05 | 0        | 1.47E-07 |
| 71    | 100    | 62.6031  | 22777 | 50 | 0.000303 | 0        | 1.55E-09 |
| 45.5  | 58.264 | 62.3906  | 22695 | 40 | 0.003249 | 0        | 6.43E-07 |
| 36    | 100    | 62.0978  | 22586 | 49 | 0.000474 | 0        | 8.54E-09 |
| 30.7  | 100    | 18.603   | 6427  | 43 | 0.002152 | 0        | 0.000306 |
| 22.3  | 100    | 61.3876  | 22306 | 29 | 0.049307 | 0        | 0.00012  |
| 43.6  | 100    | 61.0846  | 22188 | 57 | 6.53E-05 | 0        | 1.79E-09 |
| 21.5  | 100    | 60.8835  | 22109 | 37 | 0.006772 | 0        | 0.000182 |
| 22.1  | 22.713 | 140.9941 | 54427 | 81 | 3.42E-07 | 0        | 1.75E-10 |
| 141.9 | 61.148 | 140.9968 | 54429 | 96 | 1.13E-08 | 0        | 5.81E-12 |
| 19.8  | 100    | 63.4005  | 23098 | 27 | 0.075912 | 0        | 0.000228 |
| 57.5  | 100    | 18.5998  | 5639  | 38 | 0.005987 | 0        | 0.000388 |
| 58.5  | 100    | 22.8321  | 8318  | 46 | 0.001033 | 0        | 4.61E-07 |
| 20.3  | 100    | 63.9025  | 23289 | 30 | 0.033582 | 0        | 0.000117 |
| 16.7  | 100    | 64.1116  | 23369 | 33 | 0.017698 | 0        | 0.000135 |
| 29.5  | 100    | 19.1034  | 5826  | 42 | 0.002184 | 0        | 0.000294 |
| 25.3  | 100    | 63.6091  | 23177 | 56 | 8.15E-05 | 0        | 4.55E-08 |
| 69.1  | 100    | 20.4678  | 6330  | 21 | 0.357552 | 0        | 0.000185 |
| 16.4  | 100    | 18.6278  | 5649  | 49 | 0.000488 | 0        | 0.000321 |
| 30.4  | 100    | 17.1205  | 5348  | 46 | 0.000398 | 0.000141 | 0.00162  |
| 3.2   | 100    | 96.5058  | 36140 | 29 | 0.014501 | 0.000525 | 0.002329 |
| 195.9 | 100    | 13.941   | 4034  | 34 | 0.003157 | 0.000525 | 0.002301 |
| 21.7  | 100    | 17.0813  | 5052  | 39 | 0.002248 | 0.000525 | 0.002367 |
| 93    | 100    | 49.9014  | 19710 | 44 | 0.000708 | 0.000525 | 0.002619 |
| 31.6  | 100    | 19.0713  | 5743  | 29 | 0.048011 | 0.000868 | 0.003519 |
| 14.4  | 100    | 23.7256  | 7394  | 50 | 0.000313 | 0.000951 | 0.004099 |
| 69.4  | 100    | 13.0206  | 3587  | 28 | 0.064765 | 0.000951 | 0.003629 |
| 22    | 100    | 46.3596  | 16154 | 36 | 0.012374 | 0.000951 | 0.004049 |
| 117.4 | 47.993 | 13.1225  | 3642  | 43 | 0.00084  | 0.000951 | 0.004577 |
| 1.8   | 100    | 99.2319  | 40750 | 47 | 0.000242 | 0.000951 | 0.004558 |
| 75.3  | 100    | 23.5053  | 8608  | 20 | 0.239869 | 0.000951 | 0.004526 |
| 13.9  | 88.765 | 61.8887  | 24878 | 31 | 0.03186  | 0.001022 | 0.005693 |
| 18.7  | 100    | 64.2971  | 23754 | 46 | 0.000879 | 0.001022 | 0.004855 |
| 201.1 | 100    | 24.3389  | 7615  | 25 | 0.105042 | 0.001022 | 0.005384 |
| 19.6  | 100    | 13.0759  | 3561  | 20 | 0.392137 | 0.001498 | 0.007764 |
| 50.8  | 100    | 45.756   | 15916 | 34 | 0.014402 | 0.002012 | 0.01091  |
| 7.2   | 100    | 57.9508  | 21236 | 23 | 0.207893 | 0.002012 | 0.01079  |
| 3.4   | 100    | 87.8388  | 33512 | 37 | 0.006497 | 0.002012 | 0.0111   |
| 28.2  | 100    | 51.0891  | 20228 | 36 | 0.011669 | 0.002012 | 0.01112  |
| 6.8   | 100    | 53.3837  | 18937 | 19 | 0.538232 | 0.002079 | 0.01197  |
| 33.4  | 100    | 33.2541  | 11785 | 30 | 0.031633 | 0.002315 | 0.01319  |
| 13.6  | 100    | 63.033   | 23243 | 38 | 0.005084 | 0.002315 | 0.0131   |
| 2.2   | 100    | 97.7703  | 37594 | 24 | 0.099874 | 0.002315 | 0.01397  |

|       |        |          |       |    |          |          |          |
|-------|--------|----------|-------|----|----------|----------|----------|
| 140.6 | 32.983 | 64.4411  | 23817 | 33 | 0.018469 | 0.002376 | 0.01475  |
| 0.8   | 100    | 105.6406 | 37957 | 31 | 0.022945 | 0.002376 | 0.01506  |
| 19.6  | 100    | 66.7847  | 24424 | 37 | 0.004015 | 0.002543 | 0.01604  |
| 0     | 100    | 104.6123 | 42931 | 30 | 0.012212 | 0.002719 | 0.0166   |
| 12.2  | 100    | 67.5719  | 25111 | 39 | 0.003003 | 0.002843 | 0.01904  |
| 7.6   | 100    | 113.5534 | 41253 | 22 | 0.274249 | 0.002843 | 0.01863  |
| 10.6  | 100    | 46.3072  | 18170 | 24 | 0.081183 | 0.003096 | 0.02     |
| 56.1  | 100    | 31.875   | 12087 | 34 | 0.006997 | 0.003254 | 0.02131  |
| 8.6   | 100    | 98.285   | 37835 | 21 | 0.17315  | 0.00337  | 0.02257  |
| 21.1  | 100    | 20.2237  | 6231  | 16 | 1.052789 | 0.003533 | 0.02484  |
| 19.7  | 100    | 48.1126  | 16852 | 27 | 0.095365 | 0.003674 | 0.02568  |
| 3.1   | 100    | 69.9745  | 28349 | 23 | 0.106549 | 0.004124 | 0.02967  |
| 0     | 100    | 20.4774  | 6031  | 23 | 0.132305 | 0.004192 | 0.03047  |
| 80.2  | 100    | 31.373   | 11869 | 30 | 0.019273 | 0.004504 | 0.03191  |
| 12.5  | 100    | 21.1169  | 7581  | 12 | 1.67672  | 0.008997 | 0.06967  |
| 6.6   | 100    | 81.3833  | 30553 | 12 | 2.908424 | 0.009818 | 0.07875  |
| 0.9   | 100    | 98.4904  | 36924 | 38 | 0.006341 | 0        | 0.000255 |
| 0.5   | 100    | 87.4574  | 35745 | 40 | 0.003748 | 0        | 0.001436 |
| 2.1   | 100    | 91.4507  | 37415 | 39 | 0.004861 | 0        | 0.00093  |
| 41.2  | 100    | 66.7775  | 22572 | 32 | 0.028312 | 0        | 0.000361 |
| 2.3   | 100    | 136.8752 | 50600 | 56 | 0.000108 | 0        | 7.96E-06 |
| 47.8  | 100    | 46.3737  | 14840 | 43 | 0.002109 | 0        | 4.09E-08 |
| 63.7  | 100    | 46.0317  | 14708 | 38 | 0.007396 | 0        | 1.18E-06 |
| 31.7  | 100    | 85.9692  | 30081 | 52 | 0.000236 | 0        | 0.000124 |
| 4.1   | 100    | 127.4234 | 49569 | 25 | 0.039247 | 0        | 0.000516 |
| 12.4  | 100    | 85.1274  | 32161 | 19 | 0.19573  | 0        | 0.001225 |
| 2.6   | 100    | 64.6312  | 23899 | 84 | 6.27E-08 | 0        | 6.26E-09 |
| 87.9  | 100    | 140.2094 | 53998 | 37 | 0.00762  | 0        | 9.04E-06 |
| 11.8  | 100    | 36.1079  | 12070 | 34 | 0.013799 | 0        | 0.000857 |
| 3.5   | 100    | 80.1473  | 30027 | 29 | 0.014393 | 0        | 0.000217 |
| 11.8  | 100    | 115.6501 | 43364 | 34 | 0.020074 | 0        | 0.001375 |
| 21.7  | 100    | 80.0436  | 29978 | 24 | 0.045528 | 0        | 0.000359 |
| 8.5   | 100    | 45.6478  | 16322 | 27 | 0.003821 | 0        | 0.000389 |
| 17.8  | 100    | 26.6634  | 9957  | 38 | 0.004499 | 0        | 0.000511 |
| 29.2  | 100    | 27.2538  | 10185 | 40 | 0.00432  | 0        | 0.000155 |
| 47.9  | 100    | 25.808   | 9612  | 34 | 0.016405 | 0        | 5.23E-05 |
| 5.3   | 100    | 96.378   | 35246 | 34 | 0.019065 | 0        | 0.000252 |
| 126   | 69.977 | 35.5763  | 13639 | 50 | 0.000482 | 0        | 7.2E-09  |
| 80.8  | 100    | 13.7042  | 3972  | 21 | 0.122509 | 0.000141 | 0.001565 |
| 46.6  | 100    | 51.4686  | 18601 | 45 | 0.000999 | 0.000525 | 0.00248  |
| 2.1   | 100    | 93.102   | 34789 | 30 | 0.004873 | 0.000525 | 0.002574 |
| 4.3   | 100    | 93.5414  | 35229 | 35 | 0.012526 | 0.00065  | 0.002775 |
| 11.1  | 100    | 79.0017  | 29306 | 38 | 0.007021 | 0.00065  | 0.00274  |
| 42.7  | 100    | 29.9463  | 11276 | 16 | 1.282775 | 0.00065  | 0.002774 |
| 5.9   | 100    | 132.5195 | 50617 | 32 | 0.028454 | 0.000758 | 0.002952 |
| 6.6   | 100    | 78.5446  | 27830 | 27 | 0.062664 | 0.000758 | 0.002858 |
| 48.4  | 100    | 50.1609  | 17622 | 45 | 0.001065 | 0.000868 | 0.003308 |
| 69.5  | 100    | 36.1246  | 12078 | 14 | 1.759282 | 0.000951 | 0.003949 |
| 8.8   | 100    | 65.1437  | 24107 | 17 | 0.433793 | 0.000951 | 0.003757 |
| 75.9  | 100    | 22.812   | 7760  | 36 | 0.009027 | 0.001022 | 0.004971 |
| 3.3   | 100    | 112.3213 | 41922 | 22 | 0.1858   | 0.001022 | 0.005329 |
| 12.6  | 100    | 35.5949  | 13648 | 19 | 0.564762 | 0.001114 | 0.005894 |

|      |        |          |       |    |          |          |          |
|------|--------|----------|-------|----|----------|----------|----------|
| 67   | 100    | 29.9606  | 11283 | 11 | 3.859754 | 0.001758 | 0.009658 |
| 2.5  | 100    | 42.0557  | 13232 | 45 | 0.000501 | 0.002079 | 0.01155  |
| 60.3 | 100    | 17.011   | 5019  | 36 | 0.008209 | 0.002079 | 0.01191  |
| 11.3 | 100    | 59.4601  | 21343 | 25 | 0.094379 | 0.002079 | 0.01151  |
| 11.5 | 100    | 74.6618  | 27759 | 24 | 0.050837 | 0.002315 | 0.0134   |
| 16.6 | 100    | 13.7325  | 3982  | 31 | 0.01331  | 0.002315 | 0.01328  |
| 19.3 | 100    | 57.3714  | 19106 | 18 | 0.49769  | 0.002376 | 0.01461  |
| 9.4  | 100    | 85.9836  | 30087 | 25 | 0.116519 | 0.002376 | 0.01531  |
| 37.7 | 100    | 17.1425  | 4793  | 38 | 0.004931 | 0.002376 | 0.01428  |
| 10.8 | 100    | 46.5925  | 14916 | 17 | 0.842057 | 0.002543 | 0.01561  |
| 23.6 | 100    | 71.2927  | 26305 | 32 | 0.019449 | 0.003096 | 0.01993  |
| 2.9  | 100    | 93.2194  | 35098 | 18 | 0.61457  | 0.00337  | 0.02338  |
| 3.6  | 100    | 91.4594  | 37419 | 27 | 0.079786 | 0.00337  | 0.02213  |
| 22.2 | 100    | 29.1669  | 10167 | 12 | 1.730858 | 0.003456 | 0.02429  |
| 0    | 100    | 136.3713 | 50394 | 18 | 0.659735 | 0.003674 | 0.02652  |
| 11.3 | 100    | 36.2348  | 12122 | 41 | 0.00138  | 0.003674 | 0.02567  |
| 5.3  | 100    | 15.4052  | 4310  | 23 | 0.229609 | 0.004192 | 0.03016  |
| 5.3  | 100    | 15.4052  | 4310  | 23 | 0.229609 | 0.004192 | 0.03016  |
| 7.4  | 100    | 88.7673  | 33295 | 28 | 0.039562 | 0.004581 | 0.03222  |
| 3.7  | 100    | 60.139   | 19999 | 17 | 0.613127 | 0.00573  | 0.0413   |
| 66.3 | 100    | 22.5082  | 8176  | 31 | 0.030589 | 0.007213 | 0.05273  |
| 9.5  | 100    | 89.3969  | 33356 | 58 | 5.2E-05  | 0        | 1.04E-07 |
| 15   | 18.621 | 88.8908  | 33167 | 55 | 0.000105 | 0        | 1.33E-06 |
| 2.7  | 100    | 88.6511  | 33077 | 49 | 0.000359 | 0        | 5.04E-05 |
| 6.7  | 100    | 88.5994  | 33057 | 52 | 0.000206 | 0        | 5.37E-06 |
| 9.1  | 4.99   | 88.3884  | 32974 | 54 | 0.000108 | 0        | 2.02E-07 |
| 10.7 | 100    | 88.1522  | 32878 | 35 | 0.008837 | 0        | 0.000873 |
| 0.9  | 100    | 84.8175  | 31535 | 31 | 0.022655 | 0        | 0.000967 |
| 3    | 100    | 87.5262  | 32612 | 49 | 0.000185 | 0        | 6.17E-05 |
| 6.8  | 100    | 87.0225  | 32411 | 82 | 9.16E-08 | 0        | 1.45E-07 |
| 15.8 | 100    | 86.5145  | 32197 | 96 | 3.53E-09 | 0        | 8.68E-10 |
| 56.4 | 100    | 57.1403  | 19017 | 36 | 0.009473 | 0        | 0.000661 |
| 0    | 100    | 64.3057  | 23634 | 57 | 8.32E-05 | 0        | 0.000358 |
| 56.4 | 100    | 57.1403  | 19017 | 36 | 0.009473 | 0        | 0.000661 |
| 20.5 | 100    | 18.0982  | 5511  | 67 | 6.82E-06 | 0        | 0.000798 |
| 65.1 | 100    | 20.7046  | 6526  | 19 | 0.363533 | 0        | 6.08E-05 |
| 10.6 | 100    | 125.1641 | 46654 | 57 | 7.27E-05 | 0        | 7.74E-07 |
| 18.6 | 100    | 124.6599 | 46483 | 73 | 2.04E-06 | 0        | 3.8E-09  |
| 7.8  | 100    | 124.155  | 46313 | 65 | 1.24E-05 | 0        | 5.35E-07 |
| 7.6  | 100    | 123.651  | 46139 | 64 | 1.66E-05 | 0        | 3.08E-07 |
| 3.9  | 100    | 123.1502 | 45965 | 74 | 1.73E-06 | 0        | 1.14E-06 |
| 5.1  | 100    | 122.6437 | 45793 | 66 | 9.34E-06 | 0        | 2.86E-06 |
| 2.7  | 100    | 122.1358 | 45612 | 68 | 5.86E-06 | 0        | 1.84E-06 |
| 6    | 100    | 139.8071 | 51693 | 52 | 0.000272 | 0        | 1.29E-05 |
| 1    | 100    | 120.1127 | 49349 | 41 | 0.003409 | 0        | 0.00056  |
| 0.9  | 100    | 120.6226 | 49557 | 54 | 0.000147 | 0        | 0.000164 |
| 2.3  | 100    | 131.2203 | 53820 | 62 | 2.78E-05 | 0        | 1.36E-05 |
| 0.4  | 100    | 130.7056 | 53610 | 32 | 0.022735 | 0        | 0.001428 |
| 1.2  | 100    | 130.2024 | 53418 | 37 | 0.008709 | 0        | 0.000911 |
| 1.8  | 100    | 129.6996 | 53221 | 37 | 0.008495 | 0        | 0.001029 |
| 2.5  | 100    | 129.1927 | 53016 | 71 | 3.22E-06 | 0        | 8.85E-07 |
| 2.1  | 100    | 128.6882 | 52803 | 62 | 2.49E-05 | 0        | 7.99E-06 |

|       |        |          |       |     |          |   |          |
|-------|--------|----------|-------|-----|----------|---|----------|
| 3.3   | 100    | 128.1845 | 52609 | 63  | 2E-05    | 0 | 3.01E-06 |
| 11.4  | 100    | 127.683  | 52407 | 58  | 7.02E-05 | 0 | 4.14E-07 |
| 4.8   | 100    | 131.7325 | 54037 | 59  | 4.43E-05 | 0 | 5.96E-06 |
| 5     | 100    | 127.1771 | 52184 | 67  | 8.76E-06 | 0 | 3.27E-06 |
| 5.1   | 100    | 126.6723 | 51987 | 70  | 4E-06    | 0 | 1.93E-06 |
| 3.2   | 100    | 126.2254 | 51814 | 52  | 0.000257 | 0 | 0.000172 |
| 15.3  | 100    | 126.1681 | 51789 | 67  | 8.83E-06 | 0 | 1.27E-07 |
| 3.5   | 100    | 125.7227 | 51600 | 51  | 0.000341 | 0 | 0.000137 |
| 13.7  | 98.75  | 125.6656 | 51576 | 65  | 1.15E-05 | 0 | 2.86E-08 |
| 8.6   | 100    | 125.2193 | 51407 | 99  | 4.81E-09 | 0 | 2.13E-09 |
| 10.3  | 56.857 | 125.1616 | 51383 | 61  | 3.35E-05 | 0 | 1.9E-06  |
| 18    | 100    | 124.7159 | 51212 | 111 | 3.45E-10 | 0 | 6.17E-11 |
| 12.8  | 29.86  | 124.6546 | 51186 | 67  | 8.79E-06 | 0 | 3.61E-07 |
| 11.2  | 100    | 124.2103 | 51013 | 90  | 4.14E-08 | 0 | 3.96E-09 |
| 13.9  | 68.559 | 124.1517 | 50989 | 63  | 1.83E-05 | 0 | 4.87E-07 |
| 10    | 100    | 124.0897 | 50965 | 48  | 0.000676 | 0 | 0.00014  |
| 12.8  | 67.074 | 86.2407  | 35200 | 90  | 1.23E-08 | 0 | 6.23E-10 |
| 17.6  | 100    | 85.8326  | 35020 | 71  | 1.29E-06 | 0 | 5.42E-07 |
| 29.9  | 31.201 | 85.7349  | 34980 | 107 | 2.57E-10 | 0 | 7.1E-11  |
| 14    | 100    | 86.3397  | 35246 | 55  | 5.18E-05 | 0 | 2.41E-05 |
| 26.6  | 22.391 | 60.6781  | 20409 | 38  | 0.004645 | 0 | 4.96E-05 |
| 46.4  | 100    | 35.1084  | 12489 | 80  | 4.36E-07 | 0 | 5.55E-06 |
| 86.3  | 59.188 | 15.4609  | 4560  | 41  | 0.003176 | 0 | 4.66E-06 |
| 15.7  | 100    | 15.4572  | 4558  | 49  | 0.000476 | 0 | 0.000679 |
| 8.2   | 100    | 140.2746 | 57358 | 64  | 1.73E-05 | 0 | 2.07E-06 |
| 1.7   | 100    | 139.7461 | 57125 | 49  | 0.000526 | 0 | 0.00023  |
| 83.5  | 100    | 13.5626  | 3747  | 29  | 0.052176 | 0 | 0.001184 |
| 14.3  | 100    | 140.521  | 57474 | 77  | 3.82E-07 | 0 | 1.36E-07 |
| 21.5  | 34.291 | 140.5167 | 57472 | 104 | 7.66E-10 | 0 | 6.5E-11  |
| 48.1  | 52.334 | 21.3899  | 7190  | 56  | 7.19E-05 | 0 | 0.000183 |
| 50    | 62.038 | 20.8811  | 6991  | 54  | 0.000123 | 0 | 0.000796 |
| 42.6  | 100    | 22.5092  | 6596  | 24  | 0.128952 | 0 | 2.2E-05  |
| 73.1  | 20.042 | 23.0321  | 6776  | 41  | 0.002628 | 0 | 4.44E-07 |
| 102.9 | 3.357  | 23.0145  | 6770  | 39  | 0.004465 | 0 | 3.29E-06 |
| 18.7  | 100    | 24.3261  | 7197  | 30  | 0.033641 | 0 | 0.000705 |
| 30.3  | 100    | 23.8114  | 7025  | 31  | 0.02265  | 0 | 1.06E-05 |
| 9.8   | 100    | 116.5624 | 42533 | 38  | 0.007344 | 0 | 0.000238 |
| 3.4   | 100    | 111.1449 | 40277 | 35  | 0.010614 | 0 | 0.000586 |
| 27.3  | 36.562 | 110.643  | 40087 | 77  | 6.76E-07 | 0 | 1.91E-08 |
| 12.2  | 100    | 110.2583 | 39923 | 20  | 0.297422 | 0 | 0.000494 |
| 60.9  | 100    | 122.7366 | 45068 | 32  | 0.025373 | 0 | 1.89E-07 |
| 1.4   | 100    | 119.1068 | 43584 | 25  | 0.092714 | 0 | 0.001516 |
| 8.9   | 100    | 120.678  | 44204 | 26  | 0.113223 | 0 | 0.000349 |
| 43    | 2.588  | 73.3969  | 27006 | 78  | 6.66E-07 | 0 | 5.25E-06 |
| 34.9  | 3.88   | 73.4249  | 27017 | 70  | 3.96E-06 | 0 | 4.53E-06 |
| 2.8   | 100    | 13.0947  | 3528  | 44  | 0.000926 | 0 | 0.000207 |
| 0     | 100    | 13.1024  | 3531  | 70  | 2.55E-06 | 0 | 0.000236 |
| 10.2  | 100    | 84.3859  | 31429 | 24  | 0.114656 | 0 | 0.001227 |
| 10.9  | 100    | 20.6506  | 6088  | 25  | 0.131404 | 0 | 0.000795 |
| 23.6  | 100    | 65.0551  | 23633 | 25  | 0.15158  | 0 | 0.001075 |
| 23.5  | 100    | 16.0271  | 4530  | 38  | 0.003129 | 0 | 0.00046  |
| 12    | 100    | 64.0024  | 23203 | 39  | 0.005605 | 0 | 0.000342 |

|       |        |          |       |     |          |          |          |
|-------|--------|----------|-------|-----|----------|----------|----------|
| 12.8  | 100    | 18.0025  | 5239  | 68  | 5.79E-06 | 0        | 0.001295 |
| 12    | 100    | 63.499   | 23006 | 45  | 0.001559 | 0        | 0.000145 |
| 24.4  | 100    | 62.9942  | 22800 | 45  | 0.001453 | 0        | 9.45E-06 |
| 26.1  | 100    | 62.533   | 22614 | 39  | 0.005191 | 0        | 1.69E-05 |
| 10.3  | 100    | 62.5128  | 22604 | 72  | 3.06E-06 | 0        | 8.52E-08 |
| 70.5  | 3.944  | 62.4911  | 22594 | 51  | 0.000382 | 0        | 1.1E-05  |
| 86.6  | 78.056 | 61.9882  | 22382 | 37  | 0.009081 | 0        | 3.01E-05 |
| 3.3   | 100    | 118.9062 | 45977 | 55  | 0.000119 | 0        | 4.49E-06 |
| 8.1   | 100    | 118.4008 | 45762 | 60  | 3.62E-05 | 0        | 1.05E-06 |
| 8.2   | 80.087 | 117.8974 | 45561 | 77  | 8.97E-07 | 0        | 2.03E-08 |
| 8.2   | 100    | 140.0412 | 52045 | 34  | 0.018388 | 0        | 2.49E-05 |
| 2.4   | 100    | 117.3944 | 45359 | 41  | 0.003022 | 0        | 0.00064  |
| 15.6  | 100    | 139.9314 | 53865 | 61  | 3.16E-05 | 0        | 9.32E-08 |
| 0     | 100    | 95.4927  | 36640 | 64  | 3.48E-06 | 0        | 0.000317 |
| 248.9 | 13.228 | 13.386   | 3767  | 43  | 0.002484 | 0        | 0.000237 |
| 53.6  | 100    | 32.4423  | 11003 | 38  | 0.006384 | 0        | 0.000252 |
| 514.8 | 100    | 140.3247 | 54053 | 64  | 6.19E-06 | 0        | 3.57E-08 |
| 210.6 | 71.355 | 140.3072 | 54045 | 64  | 7.34E-06 | 0        | 7.51E-08 |
| 66.3  | 100    | 49.0857  | 17193 | 63  | 1.52E-05 | 0        | 0.000203 |
| 15.4  | 100    | 47.5212  | 16574 | 58  | 5.17E-05 | 0        | 0.000171 |
| 74.9  | 100    | 48.5846  | 16993 | 57  | 6.58E-05 | 0        | 0.000592 |
| 9.6   | 100    | 116.004  | 43515 | 28  | 0.064323 | 0        | 0.000354 |
| 11.5  | 100    | 114.9952 | 43068 | 22  | 0.242878 | 0        | 0.000745 |
| 7.2   | 100    | 114.3317 | 42784 | 37  | 0.008411 | 0        | 0.00135  |
| 91.7  | 7.76   | 115.5009 | 43295 | 37  | 0.008172 | 0        | 2.77E-07 |
| 31.8  | 59.854 | 115.5239 | 43305 | 48  | 0.000637 | 0        | 1.18E-06 |
| 20.3  | 72.007 | 115.5481 | 43316 | 19  | 0.507418 | 0        | 0.000195 |
| 23.3  | 14.073 | 141.1806 | 54542 | 81  | 3.57E-07 | 0        | 3.33E-08 |
| 165.7 | 62.117 | 141.1839 | 54545 | 110 | 4.15E-10 | 0        | 1.57E-10 |
| 34.9  | 27.897 | 41.949   | 16273 | 49  | 0.000376 | 0        | 0.0004   |
| 13.2  | 27.096 | 41.9421  | 16269 | 76  | 8.74E-07 | 0        | 1.32E-05 |
| 15.3  | 100    | 41.4446  | 16050 | 45  | 0.000911 | 0        | 0.001362 |
| 207.2 | 12.596 | 141.1034 | 54491 | 70  | 3.79E-06 | 0        | 6.77E-07 |
| 14.7  | 43.086 | 141.1087 | 54495 | 73  | 1.68E-06 | 0        | 7.24E-07 |
| 49.3  | 12.373 | 57.5664  | 23024 | 61  | 1.27E-05 | 0        | 1.26E-05 |
| 19.1  | 86.123 | 57.234   | 22879 | 45  | 0.000486 | 0        | 0.001107 |
| 27.5  | 30.863 | 84.5775  | 30346 | 49  | 0.000506 | 0        | 0.000768 |
| 18.3  | 100    | 84.6011  | 30356 | 43  | 0.002019 | 0        | 5.95E-05 |
| 16.9  | 100    | 84.1004  | 30143 | 33  | 0.019772 | 0        | 0.000863 |
| 6.5   | 100    | 142.7429 | 55456 | 65  | 7.59E-06 | 0        | 3.29E-08 |
| 59.5  | 22.642 | 31.2552  | 11815 | 61  | 3.06E-05 | 0        | 7.72E-06 |
| 25.8  | 29.931 | 31.2814  | 11827 | 71  | 3.06E-06 | 0        | 8.41E-06 |
| 14.3  | 100    | 142.7267 | 55446 | 104 | 8.64E-10 | 0        | 3.3E-12  |
| 9.1   | 100    | 72.2991  | 29365 | 93  | 6.11E-09 | 0        | 2.78E-08 |
| 49.2  | 100    | 19.0876  | 5819  | 42  | 0.001504 | 0        | 7.31E-05 |
| 36.2  | 100    | 62.9042  | 22808 | 44  | 0.001617 | 0.000141 | 0.00165  |
| 17.4  | 100    | 22.3769  | 6632  | 24  | 0.136315 | 0.000141 | 0.001741 |
| 17.9  | 100    | 15.3567  | 4293  | 22  | 0.25725  | 0.000273 | 0.001857 |
| 1.8   | 100    | 121.6311 | 45434 | 46  | 0.001105 | 0.000273 | 0.001957 |
| 8.7   | 100    | 23.1189  | 6805  | 35  | 0.010258 | 0.000407 | 0.002142 |
| 37.3  | 100    | 19.8394  | 7010  | 46  | 0.00073  | 0.000525 | 0.002628 |
| 13.2  | 100    | 50.001   | 17556 | 46  | 0.000833 | 0.000525 | 0.002257 |



|       |        |          |       |    |          |          |          |
|-------|--------|----------|-------|----|----------|----------|----------|
| 3     | 100    | 116.9078 | 42678 | 25 | 0.126762 | 0.000758 | 0.003085 |
| 3.4   | 100    | 89.9114  | 33562 | 21 | 0.250969 | 0.000758 | 0.002867 |
| 0.3   | 100    | 109.7379 | 40829 | 25 | 0.133349 | 0.000758 | 0.00307  |
| 57.4  | 90.263 | 19.3711  | 5690  | 14 | 1.342948 | 0.000951 | 0.004119 |
| 26.8  | 100    | 47.1497  | 16471 | 22 | 0.226257 | 0.000951 | 0.00413  |
| 0.6   | 100    | 87.3586  | 32545 | 36 | 0.005194 | 0.000951 | 0.004364 |
| 35.1  | 100    | 31.1172  | 10199 | 25 | 0.105854 | 0.000951 | 0.003701 |
| 1.2   | 100    | 119.4141 | 46191 | 27 | 0.078746 | 0.000951 | 0.003826 |
| 1.5   | 100    | 133.386  | 54739 | 27 | 0.086908 | 0.000951 | 0.004491 |
| 2.3   | 100    | 124.3442 | 46376 | 33 | 0.01864  | 0.000951 | 0.004082 |
| 2.3   | 100    | 87.8856  | 32765 | 27 | 0.070376 | 0.001022 | 0.005063 |
| 8.6   | 100    | 20.1896  | 5941  | 27 | 0.080855 | 0.001022 | 0.00502  |
| 7.4   | 100    | 38.4017  | 14804 | 47 | 0.000537 | 0.001114 | 0.006074 |
| 92.8  | 100    | 25.7062  | 8508  | 45 | 0.001007 | 0.001114 | 0.006212 |
| 17.2  | 100    | 31.6218  | 10389 | 24 | 0.16201  | 0.001114 | 0.006395 |
| 18.1  | 100    | 45.4056  | 15778 | 38 | 0.007673 | 0.00141  | 0.007224 |
| 16.6  | 100    | 63.0476  | 22875 | 38 | 0.006976 | 0.001498 | 0.007931 |
| 45.8  | 100    | 31.2449  | 11810 | 33 | 0.00493  | 0.001498 | 0.00768  |
| 73    | 100    | 16.2099  | 4908  | 16 | 0.734614 | 0.001498 | 0.007959 |
| 21.1  | 100    | 26.6504  | 8871  | 50 | 3.66E-05 | 0.001498 | 0.007568 |
| 1     | 100    | 74.8353  | 27741 | 44 | 0.001785 | 0.001576 | 0.008103 |
| 36.6  | 100    | 60.1702  | 20199 | 19 | 0.343209 | 0.001576 | 0.008148 |
| 28.1  | 100    | 25.7974  | 8374  | 39 | 0.004994 | 0.001677 | 0.008903 |
| 14.9  | 100    | 116.4069 | 42466 | 7  | 9.057099 | 0.001758 | 0.009022 |
| 2.8   | 100    | 85.3275  | 34794 | 25 | 0.038541 | 0.001758 | 0.009305 |
| 0     | 100    | 72.8076  | 29588 | 24 | 0.042873 | 0.001758 | 0.009607 |
| 9.3   | 100    | 65.1096  | 23716 | 47 | 8.27E-05 | 0.001945 | 0.01002  |
| 26.6  | 100    | 14.4394  | 3975  | 17 | 0.605748 | 0.002079 | 0.01183  |
| 16.3  | 100    | 15.0366  | 4181  | 30 | 0.03146  | 0.002079 | 0.01181  |
| 32.8  | 100    | 18.8443  | 5823  | 20 | 0.358193 | 0.002079 | 0.01146  |
| 14.3  | 100    | 63.9487  | 23181 | 41 | 0.00353  | 0.002315 | 0.01332  |
| 1.5   | 100    | 121.3803 | 45347 | 24 | 0.143532 | 0.002315 | 0.01374  |
| 7.7   | 100    | 22.1634  | 6857  | 30 | 0.040873 | 0.002376 | 0.01483  |
| 79    | 100    | 35.0889  | 12481 | 33 | 0.021575 | 0.002376 | 0.01528  |
| 33.7  | 100    | 40.4913  | 13778 | 45 | 0.001099 | 0.002777 | 0.01732  |
| 25.7  | 100    | 26.1482  | 8682  | 49 | 4.26E-05 | 0.002777 | 0.01712  |
| 16.9  | 100    | 18.2967  | 5597  | 15 | 1.210861 | 0.002843 | 0.01872  |
| 1.3   | 100    | 119.9758 | 46429 | 23 | 0.21812  | 0.002843 | 0.0184   |
| 35.5  | 100    | 42.1945  | 14881 | 38 | 0.004953 | 0.002843 | 0.01901  |
| 1.9   | 100    | 112.3394 | 41931 | 21 | 0.255754 | 0.003096 | 0.02015  |
| 29.5  | 100    | 40.6665  | 14370 | 42 | 0.001924 | 0.003254 | 0.02097  |
| 24.2  | 32.512 | 23.6759  | 7716  | 58 | 2.97E-05 | 0.00337  | 0.02423  |
| 11.7  | 100    | 60.7727  | 21944 | 31 | 0.035051 | 0.00337  | 0.02333  |
| 3.7   | 100    | 117.0731 | 42743 | 24 | 0.168257 | 0.00337  | 0.02331  |
| 13.1  | 100    | 46.3182  | 16095 | 33 | 0.014505 | 0.00337  | 0.02249  |
| 106.4 | 100    | 20.9504  | 7019  | 31 | 0.024133 | 0.003674 | 0.0252   |
| 33.3  | 100    | 26.2091  | 8705  | 35 | 0.009932 | 0.003736 | 0.02741  |
| 65    | 100    | 18.8826  | 5952  | 9  | 3.160656 | 0.003736 | 0.02684  |
| 66.3  | 100    | 56.8393  | 20322 | 23 | 0.167439 | 0.003892 | 0.02839  |
| 111   | 4.369  | 38.8748  | 13145 | 40 | 0.0029   | 0.004124 | 0.02969  |
| 25    | 100    | 35.1376  | 11706 | 40 | 0.003037 | 0.004192 | 0.03058  |
| 5.7   | 100    | 116.5113 | 43736 | 17 | 0.76452  | 0.004266 | 0.031    |

|       |        |          |       |    |          |          |          |
|-------|--------|----------|-------|----|----------|----------|----------|
| 1.8   | 100    | 124.8476 | 46543 | 28 | 0.071335 | 0.004424 | 0.03171  |
| 77.4  | 100    | 18.5014  | 5685  | 12 | 2.36172  | 0.004504 | 0.03194  |
| 35.7  | 100    | 71.9596  | 29217 | 38 | 0.005754 | 0.004504 | 0.03217  |
| 151.2 | 6.798  | 41.4493  | 14576 | 43 | 0.001595 | 0.004581 | 0.03246  |
| 0.6   | 100    | 110.1419 | 39875 | 21 | 0.281115 | 0.004803 | 0.03399  |
| 0     | 100    | 101.2398 | 38557 | 19 | 0.438413 | 0.005031 | 0.03509  |
| 116.6 | 67.821 | 31.7362  | 11192 | 17 | 0.70156  | 0.005325 | 0.03728  |
| 0.3   | 100    | 84.7177  | 34523 | 13 | 0.672546 | 0.005618 | 0.03894  |
| 207.3 | 7.388  | 41.5131  | 14604 | 46 | 0.000859 | 0.00573  | 0.0414   |
| 1.7   | 100    | 18.9125  | 5963  | 42 | 0.00143  | 0.00573  | 0.04139  |
| 0     | 100    | 72.4719  | 25213 | 31 | 0.030323 | 0.00599  | 0.04533  |
| 103.2 | 100    | 43.1724  | 15286 | 45 | 0.001021 | 0.006145 | 0.04568  |
| 15.7  | 100    | 58.8878  | 21158 | 28 | 0.054565 | 0.006497 | 0.04808  |
| 12.9  | 100    | 17.1234  | 5070  | 10 | 3.037851 | 0.007057 | 0.05225  |
| 30.3  | 100    | 50.8631  | 18894 | 37 | 0.009335 | 0.00728  | 0.05294  |
| 77.5  | 100    | 58.9382  | 21177 | 19 | 0.482014 | 0.007636 | 0.05503  |
| 17.4  | 100    | 19.7383  | 5967  | 13 | 1.221173 | 0.007836 | 0.05629  |
| 3.7   | 100    | 85.5649  | 29923 | 8  | 4.395486 | 0.007836 | 0.05652  |
| 9.9   | 100    | 19.8721  | 5844  | 12 | 2.092476 | 0.007836 | 0.05596  |
| 52.2  | 100    | 60.3892  | 20289 | 26 | 0.081442 | 0.007969 | 0.05794  |
| 48.6  | 100    | 42.1937  | 14420 | 47 | 0.000691 | 0.0085   | 0.06382  |
| 3.3   | 100    | 121.1839 | 44422 | 12 | 2.46558  | 0.008683 | 0.06605  |
| 30    | 100    | 42.1841  | 14876 | 33 | 0.017326 | 0.008746 | 0.06708  |
| 207.1 | 87.613 | 21.4567  | 7216  | 28 | 0.047206 | 0.009069 | 0.0703   |
| 1.6   | 100    | 109.3363 | 40674 | 18 | 0.670638 | 0.009514 | 0.07537  |
| 85.1  | 4.458  | 72.4645  | 29441 | 40 | 0.002386 | 0.009514 | 0.07459  |
| 13.6  | 100    | 15.0813  | 4197  | 17 | 0.655315 | 0.009514 | 0.07615  |
| 2.5   | 100    | 72.4166  | 29419 | 12 | 0.738572 | 0.00971  | 0.07716  |
| 0     | 100    | 119.2043 | 43623 | 13 | 1.4551   | 0.009764 | 0.07829  |
| 10.3  | 100    | 22.5303  | 6604  | 5  | 9.484724 | 0.009818 | 0.07922  |
| 0.5   | 100    | 51.8344  | 16966 | 80 | 5.61E-08 | 0        | 5.08E-05 |
| 7.9   | 100    | 100.6459 | 37822 | 53 | 0.000174 | 0        | 7.03E-05 |
| 1     | 100    | 93.2248  | 34839 | 86 | 6.72E-08 | 0        | 1.36E-06 |
| 8.7   | 100    | 72.9943  | 27049 | 26 | 0.079106 | 0        | 5.04E-05 |
| 46.9  | 100    | 17.9579  | 5451  | 48 | 0.000286 | 0        | 1.04E-07 |
| 58    | 100    | 17.5175  | 5247  | 40 | 0.004049 | 0        | 0.000268 |
| 3.3   | 100    | 120.9962 | 45213 | 94 | 9.47E-09 | 0        | 1.82E-08 |
| 2.3   | 100    | 120.4928 | 45034 | 69 | 3.35E-06 | 0        | 7.38E-07 |
| 0.4   | 100    | 121.5011 | 45390 | 41 | 0.002006 | 0        | 0.000334 |
| 20    | 31.257 | 119.9906 | 44855 | 87 | 4.91E-08 | 0        | 4.84E-10 |
| 7.9   | 100    | 119.7712 | 44776 | 83 | 1.3E-07  | 0        | 5.87E-09 |
| 52.6  | 51.627 | 119.7099 | 44754 | 88 | 4.39E-08 | 0        | 1.97E-08 |
| 32.8  | 100    | 119.4907 | 44667 | 38 | 0.003454 | 0        | 1.63E-05 |
| 22.2  | 16.699 | 119.4863 | 44665 | 90 | 2.18E-08 | 0        | 2.62E-10 |
| 8.5   | 100    | 15.782   | 4501  | 63 | 2.02E-05 | 0        | 0.000425 |
| 48.6  | 100    | 15.747   | 4487  | 61 | 2.9E-05  | 0        | 5.55E-06 |
| 5.4   | 100    | 120.1368 | 49359 | 73 | 7.56E-07 | 0        | 7.38E-07 |
| 0     | 100    | 124.4884 | 51119 | 34 | 0.002942 | 0        | 0.000485 |
| 27.8  | 100    | 37.5546  | 13371 | 32 | 0.02164  | 0        | 0.000401 |
| 6.2   | 100    | 15.7307  | 4682  | 62 | 2.62E-05 | 0        | 0.000535 |
| 77.6  | 100    | 15.6933  | 4666  | 59 | 4.7E-05  | 0        | 9.84E-05 |
| 30.8  | 100    | 17.6503  | 5608  | 72 | 2.01E-06 | 0        | 1.59E-06 |

|       |        |          |       |     |          |   |          |
|-------|--------|----------|-------|-----|----------|---|----------|
| 96.8  | 23.454 | 17.7854  | 5674  | 29  | 0.041005 | 0 | 8.51E-05 |
| 16.8  | 100    | 19.0328  | 5451  | 38  | 0.005391 | 0 | 0.000374 |
| 12.8  | 100    | 17.9376  | 5081  | 31  | 0.016122 | 0 | 0.000196 |
| 1.5   | 20.468 | 140.9497 | 55461 | 39  | 0.00456  | 0 | 1.64E-05 |
| 22.2  | 57.575 | 140.9512 | 55462 | 86  | 8.26E-08 | 0 | 2.72E-12 |
| 12.6  | 100    | 16.1979  | 4466  | 73  | 1.84E-06 | 0 | 2.07E-05 |
| 19.5  | 57.316 | 100.6206 | 35945 | 57  | 8.63E-05 | 0 | 5.51E-06 |
| 10.5  | 100    | 101.1268 | 36145 | 58  | 6.77E-05 | 0 | 2.18E-06 |
| 84.3  | 100    | 140.5842 | 55262 | 92  | 2.65E-08 | 0 | 7.52E-12 |
| 13.6  | 100    | 16.0247  | 4529  | 57  | 8.81E-05 | 0 | 6.59E-05 |
| 15.5  | 100    | 17.9131  | 5207  | 35  | 0.006216 | 0 | 3.21E-05 |
| 5.3   | 100    | 130.0216 | 50678 | 67  | 6.98E-06 | 0 | 8.38E-08 |
| 13.1  | 100    | 129.519  | 50466 | 60  | 3.51E-05 | 0 | 4.49E-09 |
| 6.4   | 100    | 129.0133 | 50259 | 71  | 2.49E-06 | 0 | 4.67E-09 |
| 7.6   | 100    | 128.5107 | 50055 | 68  | 4.83E-06 | 0 | 2.88E-08 |
| 3.7   | 100    | 127.9964 | 49822 | 39  | 0.003783 | 0 | 0.000851 |
| 2.5   | 100    | 130.5254 | 50885 | 48  | 0.000567 | 0 | 4.86E-05 |
| 34.1  | 68.861 | 140.2397 | 55078 | 87  | 5.58E-08 | 0 | 9.03E-10 |
| 99.2  | 76.574 | 140.238  | 55077 | 77  | 5.52E-07 | 0 | 3.93E-09 |
| 0.4   | 100    | 139.5537 | 54758 | 35  | 0.003459 | 0 | 0.000107 |
| 4.5   | 100    | 139.1533 | 54578 | 60  | 9.47E-06 | 0 | 1.6E-07  |
| 7.6   | 100    | 139.0524 | 54531 | 82  | 5.58E-08 | 0 | 5.05E-10 |
| 25.8  | 100    | 139.8737 | 54905 | 48  | 0.000539 | 0 | 2.47E-09 |
| 16.5  | 73.192 | 140.5541 | 55245 | 74  | 2E-06    | 0 | 1.51E-09 |
| 13    | 100    | 140.4459 | 55182 | 55  | 9.31E-05 | 0 | 2.5E-08  |
| 72.5  | 46.035 | 98.8869  | 37504 | 38  | 0.006509 | 0 | 7.28E-08 |
| 21.3  | 66.259 | 98.7113  | 37423 | 43  | 0.002374 | 0 | 1.69E-06 |
| 7.8   | 23.145 | 98.5267  | 37340 | 60  | 3.77E-05 | 0 | 3.53E-05 |
| 45    | 2.722  | 98.4706  | 37314 | 68  | 5.46E-06 | 0 | 2.39E-06 |
| 62.1  | 21.764 | 98.3829  | 37273 | 39  | 0.005901 | 0 | 5.83E-08 |
| 19.1  | 54.299 | 98.2079  | 37194 | 55  | 0.000149 | 0 | 1.23E-07 |
| 11    | 100    | 97.705   | 36972 | 34  | 0.019408 | 0 | 4.76E-06 |
| 2.4   | 16.432 | 97.5823  | 36926 | 65  | 1.38E-05 | 0 | 2.9E-06  |
| 4.5   | 100    | 98.9747  | 37545 | 42  | 0.002409 | 0 | 0.000313 |
| 8.5   | 100    | 99.9086  | 37965 | 16  | 0.985114 | 0 | 0.000356 |
| 20.5  | 100    | 99.9043  | 37963 | 36  | 0.011233 | 0 | 2.94E-06 |
| 21.3  | 100    | 99.3939  | 37742 | 47  | 0.000968 | 0 | 1.35E-06 |
| 7.6   | 100    | 99.219   | 37661 | 47  | 0.000854 | 0 | 4.66E-05 |
| 41.3  | 22.004 | 97.1593  | 36740 | 70  | 4.39E-06 | 0 | 2.32E-06 |
| 4.5   | 100    | 110.167  | 41011 | 42  | 0.002517 | 0 | 0.000879 |
| 37.7  | 97.764 | 98.3236  | 37854 | 69  | 5.24E-06 | 0 | 9.85E-07 |
| 5.4   | 100    | 98.2929  | 37839 | 43  | 0.00226  | 0 | 0.001226 |
| 63    | 1.863  | 97.8174  | 37616 | 86  | 1.13E-07 | 0 | 6.72E-09 |
| 9.5   | 100    | 110.7212 | 41250 | 50  | 0.000449 | 0 | 1.42E-05 |
| 41.4  | 32.224 | 106.9709 | 41493 | 64  | 7.13E-06 | 0 | 1.51E-09 |
| 108.8 | 17.673 | 106.9345 | 41476 | 36  | 0.004624 | 0 | 1.83E-08 |
| 52    | 100    | 139.7844 | 53795 | 75  | 1.34E-06 | 0 | 1.37E-11 |
| 24.5  | 100    | 107.9837 | 41907 | 67  | 3.86E-06 | 0 | 1.81E-08 |
| 32.7  | 46.525 | 107.9383 | 41889 | 32  | 0.012045 | 0 | 3.55E-05 |
| 40    | 54.062 | 107.4745 | 41709 | 53  | 0.000105 | 0 | 7.33E-08 |
| 70.4  | 32.853 | 107.4361 | 41692 | 40  | 0.002149 | 0 | 4.09E-08 |
| 24.5  | 14.483 | 97.7804  | 37599 | 108 | 6.63E-10 | 0 | 6.02E-08 |

|       |        |          |       |     |          |   |          |
|-------|--------|----------|-------|-----|----------|---|----------|
| 80.1  | 1.328  | 69.2485  | 25789 | 51  | 8.43E-05 | 0 | 0.000593 |
| 54.8  | 3.24   | 138.5884 | 53243 | 83  | 1.17E-07 | 0 | 5.29E-08 |
| 78.1  | 3.887  | 69.4231  | 25862 | 54  | 4.72E-05 | 0 | 0.000253 |
| 110.1 | 10.133 | 138.6454 | 53265 | 108 | 3.61E-10 | 0 | 5.75E-09 |
| 44.3  | 100    | 69.7532  | 26002 | 61  | 1.01E-05 | 0 | 8.17E-06 |
| 33.8  | 100    | 139.2778 | 53558 | 106 | 9.54E-10 | 0 | 3.09E-12 |
| 23.3  | 100    | 94.8993  | 36376 | 46  | 0.000403 | 0 | 7.16E-06 |
| 25.8  | 75.531 | 94.8909  | 36372 | 34  | 0.006527 | 0 | 9.08E-06 |
| 31    | 100    | 94.3916  | 36157 | 62  | 8.98E-06 | 0 | 1.19E-08 |
| 36.9  | 59.068 | 94.3815  | 36152 | 32  | 0.010417 | 0 | 7.66E-06 |
| 31    | 17.709 | 15.4387  | 4781  | 68  | 6.27E-06 | 0 | 0.000309 |
| 148.6 | 100    | 15.796   | 4986  | 54  | 0.000153 | 0 | 0.000913 |
| 206.9 | 100    | 140.5064 | 54144 | 63  | 2.95E-06 | 0 | 4.21E-08 |
| 88.3  | 67.36  | 140.5003 | 54141 | 47  | 0.000108 | 0 | 4.39E-07 |
| 155.4 | 100    | 13.9518  | 4039  | 18  | 0.313662 | 0 | 0.000593 |
| 88.3  | 67.36  | 140.5003 | 54141 | 47  | 0.000101 | 0 | 4.18E-07 |
| 108.7 | 1.755  | 17.1092  | 5648  | 61  | 2.81E-05 | 0 | 3.23E-06 |
| 412.2 | 53.499 | 140.4672 | 54124 | 57  | 6.48E-06 | 0 | 4.23E-12 |
| 5.3   | 100    | 140.4779 | 54129 | 39  | 0.000351 | 0 | 7.53E-05 |
| 680.6 | 100    | 140.4889 | 54134 | 70  | 3.46E-07 | 0 | 3.32E-09 |
| 39.9  | 100    | 140.4171 | 54099 | 78  | 1.81E-07 | 0 | 6.03E-11 |
| 55.7  | 100    | 140.4026 | 54092 | 65  | 4.39E-06 | 0 | 1.61E-11 |
| 18.1  | 8.579  | 122.5656 | 46387 | 46  | 0.001101 | 0 | 6.37E-05 |
| 56.5  | 24.192 | 122.5822 | 46395 | 74  | 1.61E-06 | 0 | 2.53E-06 |
| 10.3  | 15.024 | 76.4269  | 28747 | 92  | 5.82E-09 | 0 | 2.2E-08  |
| 26    | 31.994 | 76.5682  | 28804 | 59  | 1.29E-05 | 0 | 2.52E-07 |
| 1     | 100    | 76.9382  | 28956 | 56  | 2.18E-05 | 0 | 3.78E-05 |
| 0     | 100    | 76.224   | 28660 | 105 | 1.29E-10 | 0 | 3.16E-07 |
| 9     | 100    | 81.4849  | 30845 | 19  | 0.495504 | 0 | 0.001473 |
| 55.6  | 73.324 | 81.8994  | 31013 | 38  | 0.007233 | 0 | 3.6E-06  |
| 15.5  | 100    | 81.9891  | 31053 | 30  | 0.041757 | 0 | 0.000247 |
| 56.9  | 70.307 | 82.4084  | 31238 | 38  | 0.007028 | 0 | 1.22E-06 |
| 30.4  | 100    | 82.4931  | 31276 | 26  | 0.114226 | 0 | 9.16E-05 |
| 53.5  | 64.208 | 82.9114  | 31448 | 44  | 0.001838 | 0 | 1.84E-06 |
| 26.3  | 100    | 82.997   | 31486 | 29  | 0.055353 | 0 | 2.28E-05 |
| 26.8  | 100    | 78.9329  | 29784 | 58  | 6.54E-05 | 0 | 3.18E-06 |
| 34.3  | 100    | 138.1413 | 53043 | 96  | 6.02E-09 | 0 | 2.44E-08 |
| 13.3  | 100    | 138.0846 | 53016 | 66  | 5.39E-06 | 0 | 2.22E-06 |
| 17.1  | 100    | 80.4432  | 30158 | 42  | 0.002645 | 0 | 4.72E-05 |
| 11.9  | 100    | 80.1775  | 30042 | 32  | 0.023945 | 0 | 0.00038  |
| 51.5  | 13.972 | 83.4185  | 31672 | 33  | 0.019514 | 0 | 1.14E-05 |
| 42.6  | 31.622 | 83.5048  | 31712 | 31  | 0.0332   | 0 | 6.55E-05 |
| 39.7  | 86.056 | 97.3153  | 37238 | 43  | 0.000787 | 0 | 1.67E-06 |
| 19.8  | 100    | 97.8175  | 37451 | 40  | 0.001452 | 0 | 2.15E-05 |
| 4.5   | 100    | 118.3431 | 44523 | 17  | 0.58831  | 0 | 0.000297 |
| 33.1  | 98.731 | 85.5242  | 32564 | 31  | 0.032164 | 0 | 0.000103 |
| 38.7  | 59.744 | 85.9423  | 32731 | 40  | 0.003921 | 0 | 1.91E-06 |
| 16.9  | 100    | 86.0286  | 32764 | 35  | 0.012178 | 0 | 8.9E-05  |
| 25.7  | 100    | 86.4453  | 32930 | 47  | 0.000808 | 0 | 2.54E-06 |
| 9.3   | 100    | 86.9461  | 33147 | 43  | 0.002373 | 0 | 0.000421 |
| 11.8  | 39.229 | 71.1809  | 26260 | 40  | 0.002445 | 0 | 0.000141 |
| 5.2   | 100    | 135.7374 | 52003 | 40  | 0.00363  | 0 | 1.3E-05  |

|       |        |          |       |     |          |   |          |
|-------|--------|----------|-------|-----|----------|---|----------|
| 33.3  | 23.47  | 85.4372  | 32531 | 40  | 0.004518 | 0 | 1.52E-05 |
| 35.7  | 77.994 | 85.0207  | 32364 | 33  | 0.022632 | 0 | 3.14E-05 |
| 45.8  | 27.154 | 84.9353  | 32329 | 41  | 0.003459 | 0 | 5.64E-06 |
| 28.2  | 100    | 72.1955  | 26693 | 33  | 0.010908 | 0 | 0.000213 |
| 11.6  | 100    | 83.8584  | 31869 | 43  | 0.002387 | 0 | 0.000789 |
| 37.2  | 100    | 71.8242  | 26528 | 45  | 0.000743 | 0 | 2.53E-05 |
| 63.4  | 21.68  | 83.9251  | 31899 | 40  | 0.004384 | 0 | 2.21E-06 |
| 30.3  | 38.703 | 84.0143  | 31938 | 29  | 0.049725 | 0 | 5.6E-05  |
| 30.7  | 10.744 | 84.429   | 32127 | 37  | 0.009212 | 0 | 4.56E-05 |
| 27.5  | 56.166 | 71.686   | 26472 | 45  | 0.000807 | 0 | 6.23E-06 |
| 16.3  | 48.043 | 84.5182  | 32163 | 30  | 0.039797 | 0 | 0.000212 |
| 1.1   | 95.316 | 92.3468  | 35304 | 108 | 1.06E-10 | 0 | 4.28E-07 |
| 20    | 32.754 | 92.5708  | 35391 | 53  | 7.11E-05 | 0 | 3.08E-05 |
| 42.3  | 18.959 | 92.675   | 35431 | 65  | 5.25E-06 | 0 | 1.43E-05 |
| 21.9  | 100    | 92.7143  | 35449 | 45  | 0.000484 | 0 | 0.001476 |
| 57.1  | 100    | 92.1673  | 35228 | 59  | 1.83E-05 | 0 | 5.57E-06 |
| 112.9 | 48.486 | 66.743   | 24968 | 49  | 0.000175 | 0 | 0.000541 |
| 23.8  | 59.262 | 141.1347 | 54512 | 90  | 2.56E-08 | 0 | 2.15E-11 |
| 25    | 18.317 | 50.9642  | 20172 | 51  | 0.00026  | 0 | 0.000268 |
| 65.2  | 57.091 | 42.7964  | 16647 | 58  | 6.64E-05 | 0 | 0.00035  |
| 11.1  | 39.246 | 71.1516  | 28867 | 38  | 0.00736  | 0 | 2.25E-06 |
| 1.5   | 100    | 71.2134  | 28890 | 32  | 0.032833 | 0 | 0.000664 |
| 77.8  | 6.365  | 50.4054  | 18152 | 37  | 0.003851 | 0 | 9.37E-07 |
| 46.6  | 100    | 49.3415  | 17738 | 44  | 0.000751 | 0 | 1.71E-07 |
| 22.8  | 100    | 50.3854  | 18145 | 42  | 0.001167 | 0 | 0.000336 |
| 58    | 1.895  | 49.8468  | 17940 | 47  | 0.000409 | 0 | 1.61E-06 |
| 31.7  | 76.386 | 49.8757  | 17954 | 74  | 8.65E-07 | 0 | 3.71E-08 |
| 40.9  | 60.898 | 49.9233  | 17972 | 30  | 0.018925 | 0 | 0.000998 |
| 9.2   | 100    | 59.9315  | 24005 | 36  | 0.009766 | 0 | 5.08E-05 |
| 201.6 | 9.303  | 142.2664 | 49432 | 76  | 5.44E-07 | 0 | 4.88E-06 |
| 9.2   | 100    | 59.9315  | 24005 | 36  | 0.009766 | 0 | 5.08E-05 |
| 5.3   | 100    | 65.759   | 26523 | 36  | 0.007377 | 0 | 2.59E-06 |
| 12.9  | 100    | 65.2577  | 26318 | 50  | 0.000302 | 0 | 2.09E-08 |
| 8     | 100    | 141.4908 | 54725 | 20  | 0.254506 | 0 | 0.000378 |
| 14.9  | 22.893 | 63.2356  | 25447 | 51  | 0.000252 | 0 | 3.02E-08 |
| 3.2   | 98.647 | 64.6202  | 26040 | 35  | 0.00945  | 0 | 0.000584 |
| 2.4   | 34.535 | 63.1061  | 25391 | 43  | 0.001486 | 0 | 7.77E-05 |
| 21    | 25.438 | 62.7201  | 25238 | 51  | 0.000285 | 0 | 1.03E-09 |
| 14.8  | 49.744 | 64.2478  | 25879 | 47  | 0.00067  | 0 | 1.22E-08 |
| 8     | 85.394 | 64.116   | 25822 | 63  | 1.79E-05 | 0 | 4.11E-09 |
| 33.3  | 30.775 | 63.7407  | 25670 | 51  | 0.000285 | 0 | 3.32E-10 |
| 13.6  | 76.073 | 63.6107  | 25612 | 65  | 1.14E-05 | 0 | 1.11E-09 |
| 16.1  | 79.841 | 64.7518  | 26094 | 53  | 0.00017  | 0 | 3.77E-09 |
| 61.5  | 100    | 141.369  | 54656 | 112 | 1.84E-10 | 0 | 5.63E-14 |
| 70.9  | 23.939 | 141.3293 | 54635 | 82  | 1.82E-07 | 0 | 7.37E-11 |
| 6.1   | 70.848 | 141.3706 | 54657 | 65  | 8.06E-06 | 0 | 9.72E-07 |
| 99.3  | 38.462 | 140.8372 | 54334 | 99  | 4.86E-09 | 0 | 9.34E-11 |
| 19.3  | 100    | 80.7045  | 29694 | 43  | 0.001706 | 0 | 0.000387 |
| 6.2   | 100    | 81.7139  | 30130 | 47  | 0.000668 | 0 | 0.0008   |
| 6.2   | 100    | 81.7139  | 30130 | 47  | 0.000668 | 0 | 0.0008   |
| 120.8 | 4.917  | 140.8149 | 54316 | 71  | 3.42E-06 | 0 | 2.47E-06 |
| 33.7  | 59.492 | 140.8412 | 54337 | 59  | 5.94E-05 | 0 | 2.05E-08 |

|       |        |          |       |     |          |          |          |
|-------|--------|----------|-------|-----|----------|----------|----------|
| 5.6   | 100    | 96.7143  | 35389 | 53  | 0.000225 | 0        | 4.86E-05 |
| 6.5   | 100    | 97.2185  | 35596 | 54  | 0.000167 | 0        | 6.14E-05 |
| 41.6  | 46.187 | 36.2601  | 13921 | 46  | 0.000878 | 0        | 0.001345 |
| 23    | 36.198 | 140.9181 | 54383 | 102 | 1.75E-09 | 0        | 6.66E-07 |
| 166.5 | 74.525 | 42.2871  | 16425 | 51  | 0.000312 | 0.000141 | 0.00179  |
| 3.7   | 100    | 73.4983  | 27232 | 18  | 0.575273 | 0.000141 | 0.001657 |
| 12.9  | 100    | 117.8336 | 44298 | 12  | 1.873066 | 0.000141 | 0.001563 |
| 13.8  | 100    | 52.3069  | 18899 | 26  | 0.047546 | 0.000273 | 0.002052 |
| 15.4  | 100    | 81.21    | 29924 | 45  | 0.001133 | 0.000273 | 0.001992 |
| 4     | 100    | 102.9002 | 39424 | 33  | 0.006097 | 0.000273 | 0.002006 |
| 6.7   | 100    | 98.314   | 37242 | 18  | 0.716117 | 0.000407 | 0.002157 |
| 2.2   | 100    | 16.4865  | 4562  | 49  | 0.000115 | 0.000525 | 0.00245  |
| 37.8  | 10.535 | 69.3892  | 25847 | 48  | 0.000186 | 0.000525 | 0.002263 |
| 32.3  | 100    | 49.422   | 17769 | 28  | 0.030371 | 0.000525 | 0.002161 |
| 84.1  | 100    | 50.4244  | 18159 | 22  | 0.118186 | 0.000525 | 0.002161 |
| 3.7   | 100    | 64.8982  | 23681 | 53  | 2.01E-05 | 0.000525 | 0.002517 |
| 15.4  | 100    | 81.21    | 29924 | 43  | 0.001919 | 0.000525 | 0.002543 |
| 1.7   | 100    | 139.1021 | 53476 | 41  | 0.001579 | 0.000525 | 0.002645 |
| 7.5   | 100    | 16.9506  | 4851  | 42  | 0.000267 | 0.000525 | 0.002473 |
| 11.4  | 100    | 96.5676  | 37072 | 40  | 0.00331  | 0.000525 | 0.00263  |
| 1.7   | 100    | 91.3317  | 34868 | 40  | 0.001571 | 0.000525 | 0.002601 |
| 14.8  | 100    | 62.6113  | 22649 | 14  | 1.461752 | 0.000525 | 0.002551 |
| 171.6 | 9.217  | 23.589   | 7684  | 28  | 0.04086  | 0.00065  | 0.002667 |
| 38.8  | 100    | 43.3559  | 15519 | 42  | 0.002654 | 0.00065  | 0.002668 |
| 3.3   | 100    | 100.1426 | 37611 | 33  | 0.016785 | 0.000758 | 0.003128 |
| 18.6  | 100    | 51.3834  | 18661 | 32  | 0.02063  | 0.000868 | 0.003518 |
| 4.4   | 100    | 98.2668  | 35026 | 41  | 0.003063 | 0.000868 | 0.003421 |
| 0     | 100    | 127.4222 | 48258 | 55  | 2.12E-05 | 0.000951 | 0.00378  |
| 18.8  | 100    | 36.6789  | 13049 | 33  | 0.017422 | 0.000951 | 0.004004 |
| 1.7   | 100    | 98.0144  | 37106 | 33  | 0.017977 | 0.000951 | 0.004448 |
| 19.1  | 100    | 39.1858  | 12220 | 14  | 0.742968 | 0.001022 | 0.005029 |
| 34.5  | 100    | 23.637   | 7700  | 39  | 0.002969 | 0.001022 | 0.005339 |
| 13.9  | 100    | 97.37    | 37259 | 23  | 0.07986  | 0.001022 | 0.004668 |
| 6.6   | 100    | 64.7056  | 23930 | 51  | 3.44E-05 | 0.001022 | 0.005316 |
| 59.7  | 100    | 43.3825  | 15530 | 43  | 0.001799 | 0.001022 | 0.005226 |
| 3.7   | 100    | 19.9959  | 5881  | 56  | 1.48E-05 | 0.001022 | 0.005497 |
| 5.5   | 100    | 99.4655  | 35486 | 15  | 1.372379 | 0.001114 | 0.006191 |
| 16.1  | 100    | 17.982   | 5097  | 30  | 0.019088 | 0.001114 | 0.006304 |
| 6.5   | 100    | 94.1665  | 36009 | 39  | 0.001748 | 0.001114 | 0.006412 |
| 6.1   | 100    | 122.0762 | 46170 | 37  | 0.007914 | 0.001114 | 0.005933 |
| 77.1  | 58.922 | 14.3664  | 4244  | 35  | 0.013344 | 0.00121  | 0.006464 |
| 13.6  | 100    | 110.8885 | 41320 | 53  | 0.000213 | 0.001308 | 0.006963 |
| 55.2  | 95.46  | 68.7468  | 25574 | 21  | 0.101364 | 0.001308 | 0.006989 |
| 135.8 | 43.539 | 68.8844  | 25630 | 32  | 0.006772 | 0.00141  | 0.007417 |
| 28.7  | 100    | 75.9685  | 28302 | 18  | 0.609621 | 0.001498 | 0.007638 |
| 14    | 100    | 50.444   | 19946 | 23  | 0.168678 | 0.001498 | 0.008052 |
| 9.4   | 100    | 80.6813  | 30261 | 25  | 0.135034 | 0.001498 | 0.007787 |
| 105.9 | 21.009 | 66.2364  | 24765 | 35  | 0.004629 | 0.001498 | 0.007608 |
| 23.6  | 100    | 70.2593  | 26204 | 34  | 0.004457 | 0.001576 | 0.00884  |
| 10.6  | 100    | 84.3688  | 32101 | 36  | 0.010627 | 0.001576 | 0.008435 |
| 10.2  | 100    | 65.498   | 22071 | 16  | 0.8832   | 0.001576 | 0.008873 |
| 34.2  | 100    | 39.0279  | 13914 | 23  | 0.179443 | 0.001576 | 0.008515 |

|       |        |          |       |     |          |          |          |
|-------|--------|----------|-------|-----|----------|----------|----------|
| 76.4  | 7.964  | 50.9505  | 20167 | 42  | 0.002408 | 0.001677 | 0.008952 |
| 13.6  | 100    | 79.9543  | 29400 | 36  | 0.008917 | 0.001758 | 0.009035 |
| 0.4   | 100    | 64.1458  | 25834 | 22  | 0.21549  | 0.001758 | 0.009159 |
| 10.2  | 100    | 109.9571 | 42690 | 15  | 0.646561 | 0.001758 | 0.009269 |
| 5.5   | 100    | 79.4517  | 29199 | 29  | 0.04161  | 0.001945 | 0.01017  |
| 13.3  | 100    | 97.2994  | 37380 | 33  | 0.020135 | 0.001945 | 0.01004  |
| 5.5   | 100    | 79.4517  | 29199 | 29  | 0.04161  | 0.001945 | 0.01017  |
| 7     | 100    | 67.8364  | 25216 | 29  | 0.015812 | 0.002012 | 0.01056  |
| 9.1   | 100    | 16.9845  | 4736  | 31  | 0.003367 | 0.002079 | 0.01138  |
| 3.1   | 100    | 98.9618  | 35291 | 13  | 2.130417 | 0.002257 | 0.01284  |
| 0.3   | 100    | 112.573  | 42239 | 19  | 0.327002 | 0.002257 | 0.01244  |
| 2.3   | 100    | 98.8295  | 38068 | 31  | 0.036385 | 0.002257 | 0.01252  |
| 7.7   | 100    | 100.4075 | 38192 | 12  | 2.924073 | 0.002257 | 0.01241  |
| 34.5  | 100    | 43.4924  | 15575 | 27  | 0.088684 | 0.002315 | 0.0133   |
| 185.2 | 6.044  | 142.2658 | 49431 | 46  | 0.000498 | 0.002315 | 0.01303  |
| 6.2   | 100    | 81.3954  | 30805 | 35  | 0.013802 | 0.002315 | 0.01369  |
| 267   | 55.705 | 23.5946  | 7518  | 18  | 0.450943 | 0.002376 | 0.01436  |
| 0.4   | 100    | 65.1233  | 26260 | 24  | 0.124418 | 0.002843 | 0.01898  |
| 8.7   | 100    | 36.6758  | 11338 | 22  | 0.291064 | 0.002843 | 0.01885  |
| 193.9 | 100    | 23.0877  | 7489  | 20  | 0.262604 | 0.002843 | 0.01886  |
| 14    | 100    | 48.2054  | 17303 | 38  | 0.001039 | 0.003254 | 0.0215   |
| 4.3   | 100    | 75.9838  | 28309 | 21  | 0.300756 | 0.00337  | 0.02245  |
| 6.3   | 100    | 48.9953  | 17619 | 49  | 6.93E-05 | 0.00337  | 0.02267  |
| 8.3   | 100    | 17       | 5015  | 31  | 0.003315 | 0.003456 | 0.02434  |
| 8.7   | 100    | 42.7805  | 14767 | 37  | 0.008638 | 0.003533 | 0.02484  |
| 49.2  | 100    | 24.2746  | 7946  | 20  | 0.137961 | 0.00362  | 0.02496  |
| 1.1   | 100    | 96.6703  | 36537 | 45  | 0.001127 | 0.003674 | 0.02595  |
| 73.7  | 100    | 23.77    | 7413  | 16  | 0.651811 | 0.003674 | 0.02647  |
| 2.4   | 100    | 105.6067 | 37943 | 26  | 0.1129   | 0.004643 | 0.03378  |
| 4.7   | 100    | 37.9083  | 12995 | 27  | 0.082478 | 0.005325 | 0.03713  |
| 36.2  | 100    | 17.9928  | 5467  | 17  | 0.428306 | 0.005325 | 0.03675  |
| 0     | 100    | 132.4369 | 49905 | 39  | 0.000841 | 0.005404 | 0.03763  |
| 18.7  | 100    | 94.1122  | 35989 | 26  | 0.040842 | 0.00573  | 0.04098  |
| 2.5   | 100    | 87.4522  | 33353 | 24  | 0.168399 | 0.00573  | 0.04092  |
| 3.5   | 100    | 92.064   | 35187 | 24  | 0.05667  | 0.00573  | 0.04064  |
| 1     | 100    | 97.2724  | 34639 | 43  | 0.001871 | 0.005865 | 0.04304  |
| 13.3  | 100    | 17.9447  | 6094  | 22  | 0.116681 | 0.00599  | 0.04479  |
| 2     | 100    | 99.1192  | 35352 | 10  | 4.704153 | 0.00599  | 0.04376  |
| 79.5  | 100    | 21.3386  | 6840  | 17  | 0.556868 | 0.006497 | 0.04814  |
| 0.9   | 100    | 100.416  | 38196 | 6   | 10.10392 | 0.006654 | 0.04878  |
| 14.2  | 100    | 81.1252  | 29887 | 16  | 0.483367 | 0.007423 | 0.0537   |
| 2.2   | 100    | 135.231  | 51783 | 12  | 2.422076 | 0.007903 | 0.05721  |
| 3.8   | 100    | 75.1289  | 27952 | 20  | 0.343422 | 0.00822  | 0.06058  |
| 7.2   | 100    | 69.8953  | 26057 | 21  | 0.085966 | 0.00861  | 0.06532  |
| 44.6  | 100    | 15.1763  | 4428  | 25  | 0.108872 | 0.008997 | 0.06853  |
| 0.4   | 100    | 32.6951  | 9987  | 26  | 0.059733 | 0.009858 | 0.08166  |
| 5.4   | 100    | 51.3856  | 18662 | 19  | 0.457737 | 0.009914 | 0.08203  |
| 10.5  | 98.407 | 85.9754  | 31981 | 24  | 0.110517 | 0        | 1.23E-05 |
| 5     | 100    | 86.5023  | 32192 | 24  | 0.133137 | 0        | 0.000382 |
| 8.7   | 100    | 86.4786  | 32181 | 23  | 0.141619 | 0        | 0.000254 |
| 10.2  | 100    | 85.995   | 31989 | 31  | 0.02636  | 0        | 8.73E-06 |
| 29.3  | 100    | 94.9343  | 35524 | 100 | 1.23E-09 | 0        | 5.77E-12 |

|       |        |          |       |     |          |   |          |
|-------|--------|----------|-------|-----|----------|---|----------|
| 21    | 22.147 | 94.8219  | 35475 | 107 | 2.11E-10 | 0 | 6.59E-15 |
| 22.7  | 100    | 93.3129  | 34878 | 14  | 0.793184 | 0 | 1.47E-06 |
| 18.9  | 100    | 93.2573  | 34854 | 32  | 0.014237 | 0 | 1.26E-05 |
| 19.8  | 56.945 | 92.9519  | 34723 | 44  | 0.000904 | 0 | 3.04E-08 |
| 17.9  | 79.077 | 93.4584  | 34938 | 39  | 0.002988 | 0 | 2.96E-07 |
| 2.7   | 100    | 95.3238  | 35683 | 52  | 6.61E-05 | 0 | 1.42E-05 |
| 35.1  | 100    | 63.4333  | 23299 | 54  | 0.00016  | 0 | 1.64E-05 |
| 12.3  | 100    | 63.941   | 23496 | 59  | 4.89E-05 | 0 | 5.49E-05 |
| 10.9  | 100    | 18.0162  | 5477  | 49  | 0.000423 | 0 | 0.0007   |
| 176.4 | 5.825  | 14.4506  | 4113  | 28  | 0.063476 | 0 | 0.000304 |
| 34.6  | 100    | 16.4663  | 5032  | 34  | 0.002921 | 0 | 0.000548 |
| 51.6  | 100    | 25.7053  | 8867  | 49  | 0.000405 | 0 | 0.000175 |
| 31.1  | 100    | 25.3578  | 8733  | 52  | 5.27E-05 | 0 | 3.16E-05 |
| 89.1  | 4.3    | 25.2044  | 8679  | 46  | 0.000786 | 0 | 0.000474 |
| 15.3  | 100    | 24.8515  | 8549  | 40  | 0.000808 | 0 | 0.000543 |
| 44.5  | 100    | 24.7027  | 8497  | 33  | 0.018217 | 0 | 0.001115 |
| 38.8  | 76.4   | 25.2972  | 8710  | 49  | 0.000429 | 0 | 0.000483 |
| 65.5  | 100    | 18.5322  | 6029  | 33  | 0.021116 | 0 | 0.000859 |
| 16.3  | 100    | 58.4407  | 19390 | 12  | 2.758267 | 0 | 0.000999 |
| 73.2  | 13.173 | 58.3166  | 19342 | 15  | 1.444132 | 0 | 0.000176 |
| 22.4  | 100    | 108.193  | 39051 | 65  | 1.53E-05 | 0 | 8.28E-06 |
| 33.8  | 17.672 | 108.1448 | 39029 | 61  | 3.41E-05 | 0 | 7.68E-07 |
| 3     | 100    | 71.9396  | 26378 | 56  | 5.3E-05  | 0 | 1.02E-06 |
| 2     | 100    | 85.4596  | 31869 | 19  | 0.450504 | 0 | 0.000401 |
| 10    | 66.924 | 85.4257  | 31855 | 62  | 2.1E-05  | 0 | 5.82E-09 |
| 12    | 100    | 84.9554  | 31665 | 79  | 3.99E-07 | 0 | 8.68E-12 |
| 18.4  | 22.187 | 84.9197  | 31651 | 61  | 2.59E-05 | 0 | 2.9E-10  |
| 18.7  | 28.562 | 84.8836  | 31636 | 48  | 0.000264 | 0 | 0.000301 |
| 5     | 100    | 84.4173  | 31442 | 40  | 0.003712 | 0 | 0.000013 |
| 22.1  | 53.15  | 70.0912  | 25632 | 20  | 0.360356 | 0 | 0.000155 |
| 37.6  | 66.513 | 140.4395 | 52237 | 40  | 0.003142 | 0 | 0.001004 |
| 81.8  | 100    | 139.7707 | 53788 | 93  | 2.06E-08 | 0 | 9.71E-10 |
| 20.2  | 100    | 139.6141 | 53713 | 39  | 0.004858 | 0 | 4.89E-06 |
| 24.5  | 100    | 52.3207  | 18952 | 50  | 0.000152 | 0 | 7.24E-05 |
| 39.9  | 85.823 | 108.8562 | 42249 | 95  | 2.96E-09 | 0 | 2.64E-10 |
| 30.3  | 100    | 52.3185  | 18951 | 55  | 5.07E-05 | 0 | 5.12E-05 |
| 13.6  | 100    | 51.8075  | 18740 | 23  | 0.057439 | 0 | 0.001086 |
| 47    | 13.649 | 108.3529 | 42050 | 81  | 6.86E-08 | 0 | 6.75E-09 |
| 26.4  | 53.888 | 66.088   | 24503 | 77  | 4.22E-07 | 0 | 2.12E-06 |
| 22    | 100    | 66.1143  | 24515 | 48  | 0.000322 | 0 | 3.98E-05 |
| 13.7  | 100    | 89.6355  | 34143 | 55  | 9.53E-05 | 0 | 0.001514 |
| 8.7   | 100    | 65.6044  | 24306 | 43  | 0.001071 | 0 | 0.000133 |
| 7     | 100    | 95.438   | 36616 | 48  | 0.000226 | 0 | 8.13E-05 |
| 13.9  | 100    | 139.2677 | 53553 | 61  | 2.65E-05 | 0 | 3.19E-05 |
| 17    | 100    | 95.3287  | 36565 | 48  | 0.000218 | 0 | 1.95E-06 |
| 125.6 | 32.264 | 139.3916 | 53610 | 49  | 0.0005   | 0 | 0.000291 |
| 33.1  | 9.429  | 92.8079  | 35469 | 64  | 1.41E-05 | 0 | 7.42E-05 |
| 65.5  | 5.041  | 92.8005  | 35466 | 52  | 0.000225 | 0 | 6.02E-05 |
| 318.3 | 100    | 18.3026  | 6277  | 48  | 0.000641 | 0 | 7.51E-05 |
| 58.5  | 100    | 140.3137 | 54048 | 88  | 5.06E-08 | 0 | 2.25E-15 |
| 128.8 | 100    | 140.2707 | 54027 | 87  | 6.87E-08 | 0 | 4.88E-14 |
| 128.8 | 36.519 | 140.4004 | 54091 | 94  | 1.53E-08 | 0 | 2.74E-09 |



|       |        |          |       |     |          |          |          |
|-------|--------|----------|-------|-----|----------|----------|----------|
| 67.8  | 100    | 140.4258 | 54103 | 110 | 3.91E-10 | 0        | 1.22E-12 |
| 1.4   | 100    | 75.5296  | 28362 | 91  | 2.46E-08 | 0        | 7.72E-06 |
| 23    | 100    | 77.9102  | 29071 | 51  | 0.000375 | 0        | 4.89E-05 |
| 56.8  | 21.231 | 78.4132  | 29284 | 76  | 1.18E-06 | 0        | 2.93E-06 |
| 25.5  | 35.662 | 78.4051  | 29280 | 103 | 2.44E-09 | 0        | 2E-09    |
| 4.1   | 100    | 110.4378 | 42208 | 60  | 4.4E-06  | 0        | 6.11E-06 |
| 26.6  | 25.308 | 48.3588  | 19036 | 81  | 3.14E-07 | 0        | 8.62E-06 |
| 12    | 43.922 | 70.8043  | 28718 | 80  | 7.03E-08 | 0        | 3.32E-09 |
| 24.4  | 59.596 | 70.8621  | 28744 | 47  | 0.000156 | 0        | 0.000364 |
| 4.3   | 100    | 70.3564  | 28514 | 40  | 0.000825 | 0        | 0.000514 |
| 4.6   | 100    | 41.4666  | 16060 | 51  | 0.000286 | 0        | 0.000033 |
| 26.3  | 30.773 | 44.2383  | 17259 | 66  | 2.51E-06 | 0        | 1.47E-07 |
| 4     | 100    | 43.4794  | 16941 | 37  | 0.00368  | 0        | 0.001119 |
| 27.6  | 100    | 44.1781  | 17235 | 31  | 0.008941 | 0        | 0.000161 |
| 34.6  | 100    | 43.9846  | 17154 | 74  | 8.06E-07 | 0        | 4.2E-08  |
| 9.7   | 22.521 | 43.9239  | 17129 | 97  | 3.47E-09 | 0        | 9.75E-10 |
| 31    | 100    | 14.856   | 4422  | 59  | 3.62E-05 | 0        | 0.000103 |
| 91.6  | 100    | 102.524  | 37125 | 47  | 1.86E-05 | 0        | 4.32E-05 |
| 30.3  | 100    | 53.6006  | 21321 | 45  | 0.001161 | 0        | 0.000138 |
| 11.4  | 100    | 84.6749  | 30384 | 45  | 0.001491 | 0        | 2.04E-06 |
| 14.7  | 32.371 | 84.2521  | 30207 | 63  | 2.15E-05 | 0        | 3.9E-08  |
| 33.8  | 100    | 84.1715  | 30172 | 71  | 3.87E-06 | 0        | 5.79E-11 |
| 25    | 100    | 103.2451 | 37365 | 54  | 3.62E-06 | 0        | 6.48E-06 |
| 83.9  | 43.648 | 73.6498  | 29954 | 34  | 0.011646 | 0        | 2.23E-07 |
| 51.1  | 82.021 | 25.726   | 9577  | 33  | 0.022051 | 0        | 0.000107 |
| 37.6  | 100    | 37.0597  | 14253 | 83  | 1.93E-07 | 0        | 0.000202 |
| 13.7  | 81.302 | 40.9582  | 15849 | 60  | 3.02E-05 | 0        | 4.31E-07 |
| 17.2  | 100    | 102.8295 | 37235 | 32  | 0.000624 | 0.000141 | 0.001745 |
| 9.7   | 100    | 18.9535  | 6206  | 37  | 0.00442  | 0.000141 | 0.001649 |
| 23.1  | 100    | 18.4461  | 5992  | 31  | 0.015539 | 0.000273 | 0.001911 |
| 14.9  | 100    | 46.1119  | 18081 | 61  | 1.14E-05 | 0.000273 | 0.001954 |
| 8.2   | 100    | 15.82    | 4726  | 31  | 0.027938 | 0.000273 | 0.001848 |
| 119.9 | 29.474 | 86.5356  | 32205 | 48  | 0.000375 | 0.000407 | 0.002149 |
| 12.5  | 100    | 86.6192  | 30365 | 21  | 0.29446  | 0.000407 | 0.002141 |
| 3.9   | 100    | 52.3586  | 18920 | 28  | 0.019184 | 0.000407 | 0.002133 |
| 107.9 | 100    | 15.9979  | 4815  | 55  | 0.000106 | 0.000525 | 0.002384 |
| 8     | 100    | 15.1448  | 4414  | 27  | 0.041212 | 0.000758 | 0.003067 |
| 0.8   | 100    | 61.5478  | 22368 | 51  | 6.4E-05  | 0.000758 | 0.002779 |
| 6     | 100    | 85.7801  | 31907 | 39  | 0.002582 | 0.000951 | 0.004074 |
| 5.7   | 100    | 139.3494 | 53589 | 36  | 0.009723 | 0.000951 | 0.0042   |
| 13.8  | 83.425 | 48.3852  | 19048 | 41  | 0.002918 | 0.000951 | 0.003893 |
| 68.2  | 100    | 47.7782  | 17138 | 35  | 0.002339 | 0.000951 | 0.00396  |
| 61.5  | 18.219 | 46.774   | 16760 | 37  | 0.001511 | 0.000951 | 0.004235 |
| 28.5  | 100    | 60.0657  | 21587 | 24  | 0.139404 | 0.000951 | 0.004127 |
| 12.4  | 100    | 85.2343  | 30616 | 18  | 0.766416 | 0.000951 | 0.004479 |
| 55.6  | 100    | 31.7313  | 10661 | 35  | 0.00196  | 0.000951 | 0.004329 |
| 31.5  | 14.609 | 64.6266  | 23522 | 46  | 0.000718 | 0.000951 | 0.003791 |
| 4.4   | 100    | 83.7476  | 29999 | 35  | 0.012501 | 0.001022 | 0.00576  |
| 60.8  | 100    | 46.3991  | 16618 | 31  | 0.00479  | 0.001022 | 0.004851 |
| 365.3 | 88.265 | 15.9601  | 4796  | 36  | 0.008971 | 0.001022 | 0.005551 |
| 19.9  | 100    | 18.6117  | 6063  | 36  | 0.005895 | 0.001022 | 0.005217 |
| 9.7   | 100    | 16.5791  | 4594  | 17  | 0.669884 | 0.001114 | 0.006309 |

|       |        |          |       |    |          |          |          |
|-------|--------|----------|-------|----|----------|----------|----------|
| 39.9  | 100    | 25.2522  | 7495  | 23 | 0.169371 | 0.00121  | 0.006521 |
| 41.5  | 100    | 24.8608  | 7448  | 27 | 0.067118 | 0.00121  | 0.006498 |
| 14.6  | 100    | 108.553  | 42132 | 29 | 0.011837 | 0.00121  | 0.006648 |
| 31.9  | 100    | 86.2829  | 32105 | 45 | 0.000753 | 0.00121  | 0.006714 |
| 1.3   | 100    | 109.9344 | 42023 | 27 | 0.009738 | 0.001498 | 0.008014 |
| 75.6  | 17.471 | 47.2771  | 16952 | 32 | 0.004007 | 0.001576 | 0.008267 |
| 4.4   | 100    | 102.1368 | 39136 | 30 | 0.010351 | 0.001576 | 0.008306 |
| 8.4   | 100    | 23.9448  | 7146  | 33 | 0.000531 | 0.001576 | 0.008127 |
| 124   | 85.759 | 56.1735  | 20553 | 47 | 0.000587 | 0.001576 | 0.008706 |
| 55.5  | 100    | 23.6907  | 8691  | 23 | 0.145169 | 0.001576 | 0.008547 |
| 18.3  | 100    | 102.3285 | 37061 | 24 | 0.003874 | 0.001758 | 0.009128 |
| 80.1  | 100    | 75.6259  | 28402 | 30 | 0.029537 | 0.001758 | 0.009666 |
| 81.7  | 95.302 | 64.8119  | 26118 | 41 | 0.001768 | 0.001758 | 0.009255 |
| 13.5  | 18.472 | 142.4738 | 49546 | 66 | 5.3E-08  | 0.001945 | 0.0102   |
| 70    | 100    | 17.9907  | 5466  | 17 | 0.560375 | 0.001945 | 0.01016  |
| 95.1  | 100    | 65.3198  | 26345 | 44 | 0.001045 | 0.002012 | 0.01083  |
| 210.7 | 100    | 15.8502  | 5016  | 55 | 0.000111 | 0.002012 | 0.01077  |
| 15.7  | 100    | 18.401   | 5644  | 26 | 0.055633 | 0.002012 | 0.01036  |
| 6.1   | 100    | 92.2992  | 35246 | 27 | 0.065414 | 0.002079 | 0.01178  |
| 115.1 | 3.264  | 86.0325  | 32003 | 40 | 0.00245  | 0.002079 | 0.0119   |
| 5     | 100    | 62.0585  | 22569 | 41 | 0.000623 | 0.002079 | 0.01135  |
| 3.5   | 100    | 95.8318  | 36777 | 23 | 0.060966 | 0.002315 | 0.0136   |
| 22.7  | 100    | 46.2749  | 16565 | 29 | 0.008367 | 0.002376 | 0.01456  |
| 3.6   | 100    | 62.9294  | 23104 | 23 | 0.178195 | 0.002376 | 0.01421  |
| 51.6  | 18.727 | 56.1272  | 20535 | 41 | 0.001997 | 0.002376 | 0.01444  |
| 69.9  | 100    | 27.0652  | 8861  | 38 | 0.005088 | 0.002543 | 0.01604  |
| 3.3   | 100    | 51.8548  | 18726 | 25 | 0.041198 | 0.002777 | 0.01707  |
| 7.4   | 100    | 40.2877  | 14223 | 35 | 0.000921 | 0.002843 | 0.01872  |
| 63.3  | 100    | 23.1018  | 8439  | 33 | 0.012188 | 0.00302  | 0.01956  |
| 320.3 | 6.942  | 15.8454  | 5013  | 36 | 0.008892 | 0.003178 | 0.02046  |
| 39.1  | 100    | 14.8202  | 4030  | 20 | 0.379249 | 0.00337  | 0.02178  |
| 10.3  | 100    | 115.259  | 43184 | 35 | 0.011954 | 0.00337  | 0.02279  |
| 13.1  | 100    | 70.1802  | 25666 | 17 | 0.805909 | 0.00337  | 0.02224  |
| 2     | 100    | 101.6321 | 38932 | 20 | 0.094765 | 0.00337  | 0.02321  |
| 20.4  | 100    | 58.6704  | 21487 | 12 | 0.876437 | 0.003533 | 0.0245   |
| 21.1  | 100    | 78.2747  | 27711 | 20 | 0.361464 | 0.003674 | 0.02581  |
| 62.3  | 100    | 24.1564  | 7840  | 25 | 0.114571 | 0.003674 | 0.02651  |
| 110.1 | 100    | 40.9551  | 12860 | 26 | 0.056429 | 0.003736 | 0.02777  |
| 0.4   | 100    | 80.6177  | 32837 | 46 | 0.00027  | 0.003892 | 0.02846  |
| 7.8   | 100    | 64.1304  | 23316 | 25 | 0.093502 | 0.003892 | 0.0282   |
| 4     | 100    | 71.9336  | 26375 | 9  | 2.581142 | 0.004124 | 0.02976  |
| 2.2   | 100    | 109.361  | 42451 | 21 | 0.065953 | 0.005031 | 0.03479  |
| 29.2  | 100    | 46.905   | 16809 | 22 | 0.043582 | 0.005031 | 0.03504  |
| 7.1   | 100    | 40.79    | 14423 | 35 | 0.000894 | 0.00599  | 0.04455  |
| 6.6   | 100    | 47.8754  | 18817 | 20 | 0.353079 | 0.006721 | 0.04914  |
| 11.7  | 100    | 47.8445  | 18802 | 29 | 0.051063 | 0.006991 | 0.05121  |
| 12.1  | 100    | 102.023  | 36954 | 15 | 0.033128 | 0.007057 | 0.05193  |
| 51.7  | 100    | 16.0092  | 4409  | 25 | 0.092658 | 0.007572 | 0.05456  |
| 3.1   | 100    | 111.0978 | 43162 | 14 | 0.368827 | 0.007636 | 0.05512  |
| 13.2  | 100    | 18.3285  | 6290  | 39 | 0.004448 | 0.00822  | 0.0618   |
| 84.8  | 17.446 | 64.6328  | 23525 | 37 | 0.005858 | 0.009514 | 0.07609  |
| 6.9   | 100    | 73.7526  | 29999 | 15 | 0.819367 | 0.009764 | 0.07839  |

|       |        |          |       |    |          |          |          |
|-------|--------|----------|-------|----|----------|----------|----------|
| 58.4  | 100    | 47.4289  | 17006 | 15 | 0.229776 | 0.009858 | 0.07973  |
| 4.6   | 100    | 91.1961  | 34067 | 31 | 0.038745 | 0        | 9.89E-05 |
| 8.1   | 100    | 87.3095  | 32526 | 43 | 0.002214 | 0        | 2.44E-05 |
| 7.7   | 100    | 100.8547 | 37912 | 43 | 0.001816 | 0        | 0.001157 |
| 15.2  | 100    | 101.3599 | 38123 | 58 | 4.87E-05 | 0        | 2.78E-06 |
| 34.5  | 100    | 100.1483 | 37614 | 78 | 4.75E-07 | 0        | 1.12E-07 |
| 29.1  | 100    | 99.9493  | 37531 | 45 | 0.000958 | 0        | 1.04E-05 |
| 42.8  | 69.261 | 99.8852  | 37501 | 39 | 0.003798 | 0        | 3.68E-06 |
| 10.8  | 100    | 101.3719 | 38128 | 64 | 1.48E-05 | 0        | 1.02E-05 |
| 13    | 100    | 56.2856  | 18665 | 72 | 8.85E-07 | 0        | 1.07E-05 |
| 13    | 100    | 56.2856  | 18665 | 72 | 8.85E-07 | 0        | 1.07E-05 |
| 13    | 100    | 56.2856  | 18665 | 72 | 8.85E-07 | 0        | 1.07E-05 |
| 152.5 | 6.788  | 70.6686  | 26151 | 66 | 5.79E-06 | 0        | 8.04E-05 |
| 8.3   | 100    | 27.6261  | 9139  | 27 | 0.007083 | 0        | 0.001281 |
| 11.4  | 100    | 17.4504  | 5215  | 60 | 4.26E-06 | 0        | 6.91E-07 |
| 137   | 100    | 18.3271  | 5611  | 26 | 0.046566 | 0        | 4.39E-05 |
| 2.1   | 100    | 16.7183  | 4896  | 53 | 7.93E-06 | 0        | 0.000225 |
| 10.3  | 100    | 21.3725  | 6780  | 33 | 0.015037 | 0        | 0.000115 |
| 111.9 | 32.516 | 40.1385  | 13822 | 25 | 0.11741  | 0        | 0.000793 |
| 3.6   | 100    | 121.3824 | 45348 | 46 | 0.000913 | 0        | 0.000366 |
| 4.6   | 100    | 120.877  | 45171 | 51 | 0.000259 | 0        | 0.000249 |
| 9.8   | 100    | 120.376  | 44992 | 55 | 9.29E-05 | 0        | 9.38E-06 |
| 5.8   | 100    | 119.8725 | 44811 | 45 | 0.001129 | 0        | 0.000524 |
| 4     | 100    | 118.1086 | 44176 | 46 | 0.000884 | 0        | 0.000868 |
| 9.7   | 100    | 140.1494 | 51820 | 64 | 1.64E-05 | 0        | 7.96E-06 |
| 2.7   | 100    | 140.2688 | 51872 | 79 | 2.83E-07 | 0        | 2.11E-11 |
| 3.3   | 100    | 130.7012 | 48550 | 43 | 0.002138 | 0        | 0.000583 |
| 15.5  | 100    | 129.6693 | 48201 | 96 | 9.57E-09 | 0        | 1.56E-09 |
| 12    | 100    | 129.6579 | 48197 | 72 | 2.71E-06 | 0        | 2.9E-06  |
| 85.3  | 38.683 | 129.1664 | 48030 | 86 | 9.97E-08 | 0        | 3.09E-08 |
| 57.2  | 14.127 | 129.1548 | 48026 | 59 | 4.53E-05 | 0        | 4.09E-06 |
| 81    | 5.739  | 128.6646 | 47855 | 86 | 1.11E-07 | 0        | 6.94E-09 |
| 59.9  | 2.362  | 128.6525 | 47850 | 67 | 7.24E-06 | 0        | 7.25E-06 |
| 5.5   | 100    | 128.1617 | 47673 | 49 | 0.000495 | 0        | 0.000269 |
| 6     | 100    | 128.1464 | 47668 | 64 | 1.64E-05 | 0        | 1.25E-05 |
| 12.4  | 100    | 73.3345  | 25566 | 58 | 4.44E-05 | 0        | 6.44E-06 |
| 17.2  | 94.491 | 73.8579  | 25797 | 53 | 0.00019  | 0        | 0.000106 |
| 17.6  | 100    | 71.806   | 24941 | 46 | 0.00074  | 0        | 3.39E-05 |
| 4.6   | 51.202 | 71.3029  | 24732 | 43 | 0.001433 | 0        | 2.2E-05  |
| 9.6   | 3.969  | 71.3191  | 24739 | 65 | 8.04E-06 | 0        | 4.91E-08 |
| 27.7  | 100    | 72.8312  | 25360 | 48 | 0.000447 | 0        | 2.03E-06 |
| 12.7  | 10.312 | 71.824   | 24949 | 68 | 4.03E-06 | 0        | 6.41E-08 |
| 19.5  | 90.3   | 72.3268  | 25156 | 66 | 6.68E-06 | 0        | 4.86E-08 |
| 40.7  | 9.524  | 87.1583  | 35611 | 39 | 0.005862 | 0        | 4.56E-08 |
| 3.8   | 100    | 86.6579  | 35394 | 28 | 0.080111 | 0        | 0.000224 |
| 40.7  | 100    | 87.1627  | 35613 | 42 | 0.003027 | 0        | 2.09E-07 |
| 13.3  | 100    | 85.6685  | 34950 | 31 | 0.038567 | 0        | 8.51E-07 |
| 3     | 100    | 85.0622  | 34676 | 35 | 0.01115  | 0        | 4.72E-05 |
| 13.1  | 9.044  | 87.1685  | 35616 | 43 | 0.002425 | 0        | 2.51E-06 |
| 5.8   | 100    | 89.3206  | 36531 | 28 | 0.067825 | 0        | 0.000141 |
| 2.3   | 53.975 | 87.6725  | 35832 | 33 | 0.021212 | 0        | 0.0001   |
| 25.3  | 54.952 | 87.6681  | 35830 | 53 | 0.000207 | 0        | 6.63E-09 |

|       |        |          |       |     |          |   |          |
|-------|--------|----------|-------|-----|----------|---|----------|
| 12.1  | 100    | 83.4824  | 34010 | 50  | 0.00042  | 0 | 0.000456 |
| 33.7  | 12.021 | 83.0511  | 33823 | 57  | 8.04E-05 | 0 | 3.91E-05 |
| 177.5 | 5.11   | 82.9771  | 33790 | 67  | 9.03E-06 | 0 | 1.16E-05 |
| 111   | 32.573 | 82.5453  | 33625 | 53  | 0.000181 | 0 | 7.81E-05 |
| 14.5  | 100    | 100.1275 | 41143 | 48  | 0.00051  | 0 | 4.72E-05 |
| 37.3  | 100    | 98.4515  | 40422 | 51  | 0.000249 | 0 | 7.72E-06 |
| 18.7  | 62.977 | 97.9813  | 40220 | 61  | 2.13E-05 | 0 | 4.68E-06 |
| 40    | 6.387  | 97.949   | 40205 | 60  | 3.19E-05 | 0 | 2.7E-06  |
| 15.1  | 100    | 74.5844  | 26108 | 45  | 0.001176 | 0 | 0.00016  |
| 23.1  | 100    | 61.0405  | 20548 | 51  | 0.000149 | 0 | 3.71E-06 |
| 17.3  | 100    | 43.8438  | 15710 | 47  | 0.000283 | 0 | 0.000421 |
| 17.3  | 100    | 43.8438  | 15710 | 47  | 0.000283 | 0 | 0.000421 |
| 24.9  | 100    | 60.9868  | 20526 | 45  | 0.000587 | 0 | 4.72E-06 |
| 17.4  | 100    | 17.4955  | 5533  | 47  | 9.4E-05  | 0 | 2.47E-05 |
| 28.9  | 100    | 140.2855 | 57363 | 97  | 4.35E-09 | 0 | 3.6E-12  |
| 3.2   | 100    | 140.2097 | 57328 | 100 | 2.36E-09 | 0 | 1.38E-12 |
| 32.4  | 15.438 | 70.8183  | 24529 | 59  | 3.17E-05 | 0 | 4.43E-07 |
| 4.2   | 100    | 138.3844 | 56599 | 70  | 1.55E-06 | 0 | 6.17E-09 |
| 0.9   | 100    | 138.3268 | 56575 | 54  | 6.96E-05 | 0 | 9.94E-07 |
| 1.2   | 100    | 137.8808 | 56410 | 52  | 0.000113 | 0 | 1.08E-05 |
| 1.9   | 100    | 27.2619  | 8217  | 28  | 0.004888 | 0 | 0.001065 |
| 11.2  | 100    | 64.9414  | 21858 | 69  | 2.07E-06 | 0 | 2.16E-08 |
| 18.9  | 10.472 | 64.4391  | 21669 | 61  | 1.39E-05 | 0 | 5.8E-08  |
| 24.4  | 34.35  | 64.0548  | 21516 | 78  | 2.83E-07 | 0 | 1.41E-07 |
| 38.1  | 89.675 | 64.0322  | 21507 | 54  | 6.43E-05 | 0 | 7.4E-05  |
| 26.4  | 1.293  | 63.9375  | 21470 | 69  | 2.09E-06 | 0 | 6.89E-08 |
| 25.9  | 100    | 63.5508  | 21316 | 54  | 6.36E-05 | 0 | 6.63E-05 |
| 9.4   | 100    | 63.4328  | 21271 | 48  | 0.000204 | 0 | 0.000209 |
| 8.5   | 100    | 17.4353  | 4900  | 39  | 0.000526 | 0 | 0.000777 |
| 12.9  | 100    | 17.4143  | 4892  | 45  | 0.000145 | 0 | 1.58E-05 |
| 3.9   | 100    | 28.9351  | 8748  | 45  | 0.000119 | 0 | 0.000414 |
| 88.1  | 100    | 45.4196  | 14467 | 62  | 2.66E-05 | 0 | 6.55E-05 |
| 34.5  | 100    | 48.27    | 15533 | 28  | 0.066647 | 0 | 0.001529 |
| 48.2  | 100    | 47.1972  | 15144 | 34  | 0.019638 | 0 | 0.000584 |
| 84.6  | 100    | 46.6962  | 14962 | 32  | 0.026466 | 0 | 0.000663 |
| 42.7  | 100    | 46.4258  | 14863 | 50  | 0.000483 | 0 | 0.00036  |
| 184.1 | 12.319 | 46.1917  | 14771 | 34  | 0.019638 | 0 | 0.000389 |
| 100.7 | 37.639 | 45.9217  | 14665 | 54  | 0.000191 | 0 | 0.000582 |
| 167.9 | 2.614  | 45.6814  | 14572 | 32  | 0.029912 | 0 | 0.000733 |
| 5.7   | 100    | 95.4766  | 33918 | 55  | 9.23E-05 | 0 | 4.36E-05 |
| 16.4  | 100    | 86.2656  | 32203 | 47  | 0.00082  | 0 | 0.001026 |
| 28.7  | 100    | 83.6382  | 31123 | 20  | 0.465296 | 0 | 0.000122 |
| 12.3  | 79.778 | 86.2557  | 32199 | 63  | 1.94E-05 | 0 | 4.37E-07 |
| 6.4   | 100    | 57.8042  | 20685 | 61  | 1.87E-05 | 0 | 4.58E-06 |
| 9.4   | 100    | 57.1397  | 20419 | 45  | 0.000543 | 0 | 3.67E-06 |
| 55.1  | 19.911 | 49.133   | 17265 | 42  | 0.00057  | 0 | 1.09E-05 |
| 154.6 | 91.28  | 48.7246  | 17103 | 32  | 0.006546 | 0 | 0.000888 |
| 51.7  | 100    | 48.63    | 17064 | 33  | 0.004422 | 0 | 3.11E-05 |
| 12.7  | 100    | 49.1431  | 17269 | 42  | 0.000586 | 0 | 0.000536 |
| 4.4   | 100    | 23.3812  | 6959  | 52  | 0.000145 | 0 | 0.000484 |
| 4.4   | 100    | 23.3812  | 6959  | 52  | 0.000145 | 0 | 0.000484 |
| 6.4   | 100    | 57.8042  | 20685 | 61  | 1.87E-05 | 0 | 4.58E-06 |

|       |        |          |       |    |          |   |          |
|-------|--------|----------|-------|----|----------|---|----------|
| 7.9   | 100    | 17.4207  | 5021  | 44 | 0.000191 | 0 | 8.36E-05 |
| 11.4  | 100    | 62.6193  | 22653 | 58 | 2.96E-05 | 0 | 9E-06    |
| 18.1  | 9.352  | 62.5666  | 22629 | 54 | 7.28E-05 | 0 | 7.82E-07 |
| 10.6  | 100    | 62.1077  | 22432 | 38 | 0.003096 | 0 | 0.000356 |
| 14.2  | 100    | 62.0629  | 22413 | 50 | 0.000186 | 0 | 1.92E-06 |
| 1.9   | 100    | 119.3342 | 46156 | 43 | 0.002114 | 0 | 3.15E-05 |
| 20.6  | 72.234 | 119.3266 | 46153 | 48 | 0.000577 | 0 | 1.46E-08 |
| 15.8  | 100    | 118.8194 | 45938 | 54 | 0.000173 | 0 | 1.54E-08 |
| 3.2   | 100    | 122.3777 | 47500 | 34 | 0.017316 | 0 | 0.000185 |
| 7.4   | 100    | 121.8963 | 47294 | 47 | 0.000653 | 0 | 0.000374 |
| 7.4   | 100    | 121.8963 | 47294 | 47 | 0.000653 | 0 | 0.000247 |
| 9.8   | 100    | 121.8653 | 47280 | 52 | 0.000241 | 0 | 1.11E-07 |
| 1.3   | 100    | 121.3603 | 47054 | 38 | 0.006985 | 0 | 1.27E-05 |
| 25.3  | 71.495 | 121.3581 | 47053 | 39 | 0.004805 | 0 | 5.31E-08 |
| 1.5   | 100    | 120.85   | 46824 | 32 | 0.027304 | 0 | 0.000153 |
| 24.4  | 70.203 | 120.8405 | 46820 | 49 | 0.000509 | 0 | 1.13E-08 |
| 3.8   | 100    | 120.3457 | 46589 | 35 | 0.01219  | 0 | 6.53E-06 |
| 15.6  | 71.512 | 120.3316 | 46583 | 59 | 5.1E-05  | 0 | 1.64E-09 |
| 18.8  | 100    | 119.8312 | 46371 | 53 | 0.000178 | 0 | 6.04E-09 |
| 73.9  | 21.869 | 132.1458 | 51559 | 36 | 0.004925 | 0 | 6.57E-07 |
| 89.4  | 16.888 | 132.1303 | 51551 | 56 | 4.98E-05 | 0 | 2.25E-10 |
| 94.8  | 12.421 | 132.6343 | 51774 | 59 | 2.99E-05 | 0 | 3.47E-12 |
| 72.8  | 14.49  | 132.6529 | 51782 | 34 | 0.007709 | 0 | 1.09E-06 |
| 19.4  | 100    | 133.6516 | 52219 | 30 | 0.020163 | 0 | 7.69E-07 |
| 30.5  | 100    | 133.1629 | 52019 | 28 | 0.032525 | 0 | 0.000045 |
| 53.2  | 67.196 | 133.145  | 52010 | 41 | 0.001507 | 0 | 3.1E-09  |
| 4.5   | 100    | 95.0726  | 35863 | 33 | 0.016385 | 0 | 0.000114 |
| 11.5  | 100    | 113.5897 | 43730 | 80 | 2.36E-07 | 0 | 4.88E-09 |
| 8     | 100    | 113.5142 | 43699 | 35 | 0.007808 | 0 | 0.000129 |
| 11.8  | 100    | 113.0844 | 43510 | 98 | 3.94E-09 | 0 | 8.97E-11 |
| 4.5   | 100    | 111.258  | 42747 | 55 | 0.000114 | 0 | 1.09E-05 |
| 8.3   | 100    | 114.6049 | 44172 | 91 | 2.24E-08 | 0 | 1.55E-09 |
| 19.9  | 100    | 114.5274 | 44135 | 30 | 0.029618 | 0 | 0.000138 |
| 7.1   | 100    | 114.0999 | 43942 | 76 | 7.17E-07 | 0 | 2.1E-08  |
| 26.5  | 100    | 139.7386 | 53773 | 63 | 2.13E-05 | 0 | 2.42E-05 |
| 41.3  | 100    | 56.6665  | 20696 | 11 | 3.792915 | 0 | 4.43E-05 |
| 7.4   | 100    | 55.4691  | 20206 | 99 | 7.56E-10 | 0 | 2.95E-07 |
| 63.1  | 100    | 139.6758 | 53742 | 62 | 2.64E-05 | 0 | 7.82E-08 |
| 1.3   | 100    | 67.9527  | 25264 | 70 | 1.03E-07 | 0 | 2.92E-08 |
| 1     | 85.162 | 68.2275  | 25372 | 34 | 0.000398 | 0 | 0.000683 |
| 1.5   | 100    | 68.454   | 25460 | 62 | 7.35E-07 | 0 | 2.75E-06 |
| 41.9  | 100    | 63.0997  | 23270 | 47 | 0.001115 | 0 | 0.000649 |
| 35.5  | 100    | 64.8047  | 23968 | 66 | 8.01E-06 | 0 | 0.00025  |
| 35.3  | 100    | 18.1888  | 6218  | 46 | 0.000812 | 0 | 0.000265 |
| 6.5   | 100    | 44.6873  | 15906 | 39 | 0.000722 | 0 | 0.000655 |
| 108   | 100    | 44.8421  | 15972 | 43 | 0.000254 | 0 | 2.48E-05 |
| 27.6  | 17.164 | 45.1892  | 16117 | 57 | 9.82E-06 | 0 | 2.28E-05 |
| 51.2  | 48.512 | 50.1914  | 18092 | 49 | 0.000127 | 0 | 0.000173 |
| 13.1  | 100    | 44.3185  | 15755 | 34 | 0.001762 | 0 | 0.000834 |
| 18.5  | 49.096 | 61.5722  | 22272 | 71 | 1.02E-06 | 0 | 1.36E-05 |
| 35.8  | 9.649  | 61.5551  | 22265 | 48 | 0.000219 | 0 | 0.000346 |
| 131.6 | 6.637  | 61.2289  | 22132 | 22 | 0.317814 | 0 | 5.04E-05 |

|       |        |          |       |    |          |   |          |
|-------|--------|----------|-------|----|----------|---|----------|
| 7     | 100    | 118.9879 | 44820 | 57 | 3.67E-05 | 0 | 0.000519 |
| 11.9  | 67.114 | 124.2378 | 47099 | 36 | 0.009454 | 0 | 1.99E-05 |
| 23.2  | 100    | 123.7581 | 46888 | 50 | 0.000424 | 0 | 4.39E-07 |
| 4.6   | 100    | 123.2536 | 46676 | 29 | 0.047997 | 0 | 0.000146 |
| 119.4 | 100    | 45.7967  | 15879 | 41 | 0.002655 | 0 | 0.000539 |
| 43.5  | 100    | 124.7504 | 47301 | 28 | 0.072909 | 0 | 1.42E-05 |
| 12.6  | 100    | 124.2658 | 47113 | 51 | 0.000349 | 0 | 7.39E-07 |
| 24    | 100    | 128.7389 | 49006 | 26 | 0.107452 | 0 | 8.5E-05  |
| 12.3  | 8.316  | 75.9659  | 28301 | 63 | 1.32E-05 | 0 | 9.26E-06 |
| 15.8  | 44.959 | 75.5368  | 28117 | 63 | 1.16E-05 | 0 | 1.13E-05 |
| 19.3  | 100    | 75.4606  | 28086 | 65 | 8.33E-06 | 0 | 3.44E-05 |
| 96.8  | 39.489 | 74.7439  | 28024 | 47 | 0.000636 | 0 | 0.001252 |
| 132.1 | 32.315 | 74.2352  | 27815 | 43 | 0.001359 | 0 | 0.001288 |
| 14.7  | 100    | 76.0379  | 28333 | 79 | 2.89E-07 | 0 | 6.92E-07 |
| 40.8  | 40.549 | 68.0884  | 24952 | 79 | 4.11E-08 | 0 | 2.17E-10 |
| 37.5  | 38.289 | 67.6833  | 24791 | 39 | 0.000374 | 0 | 2.75E-07 |
| 17.7  | 22.242 | 68.9403  | 25308 | 36 | 0.000769 | 0 | 1.11E-06 |
| 42.8  | 34.838 | 68.5923  | 25170 | 76 | 8.25E-08 | 0 | 6.59E-11 |
| 12.3  | 4.857  | 68.4364  | 25103 | 40 | 0.000296 | 0 | 5.46E-06 |
| 11    | 12.055 | 118.4802 | 44586 | 61 | 1.77E-05 | 0 | 0.001395 |
| 36.5  | 100    | 69.0947  | 25372 | 75 | 9.4E-08  | 0 | 7.35E-10 |
| 16.8  | 100    | 69.1252  | 25385 | 49 | 0.000436 | 0 | 0.000389 |
| 24.9  | 100    | 69.5989  | 25588 | 69 | 4.4E-07  | 0 | 1.39E-09 |
| 31.2  | 28.645 | 69.4507  | 25528 | 34 | 0.001165 | 0 | 1.19E-06 |
| 7     | 100    | 117.9744 | 44354 | 61 | 1.71E-05 | 0 | 0.000311 |
| 6.7   | 100    | 69.9569  | 25738 | 26 | 0.007932 | 0 | 0.00092  |
| 38.7  | 9.002  | 76.3432  | 28362 | 49 | 4.69E-05 | 0 | 6.14E-06 |
| 93    | 12.863 | 50.3957  | 19925 | 41 | 0.003371 | 0 | 1.32E-07 |
| 21.7  | 11.108 | 76.8459  | 28545 | 58 | 6.74E-06 | 0 | 3.07E-06 |
| 9.1   | 100    | 41.0085  | 14514 | 22 | 0.009941 | 0 | 0.001467 |
| 15.6  | 100    | 44.023   | 15686 | 46 | 0.000105 | 0 | 4.36E-05 |
| 60.2  | 68.418 | 76.4499  | 28402 | 97 | 8.4E-10  | 0 | 1.79E-10 |
| 64.7  | 55.484 | 49.889   | 19704 | 44 | 0.00163  | 0 | 2.12E-06 |
| 4.2   | 100    | 43.1369  | 15345 | 68 | 6.62E-07 | 0 | 0.000111 |
| 79.1  | 100    | 46.3084  | 16581 | 30 | 0.046052 | 0 | 6.06E-06 |
| 34.4  | 23.183 | 54.5054  | 19710 | 66 | 4.11E-06 | 0 | 1.44E-05 |
| 40.7  | 100    | 53.5026  | 19345 | 65 | 4.62E-06 | 0 | 1.19E-05 |
| 71.7  | 30.191 | 54.0036  | 19531 | 65 | 4.7E-06  | 0 | 2.76E-05 |
| 32.9  | 28.454 | 47.8832  | 17177 | 61 | 2.16E-06 | 0 | 1.01E-05 |
| 7.8   | 100    | 66.4615  | 24855 | 95 | 5.4E-10  | 0 | 1.42E-07 |
| 20.6  | 100    | 47.3774  | 16987 | 45 | 8.81E-05 | 0 | 0.000237 |
| 25.9  | 100    | 47.7114  | 17114 | 84 | 7.18E-09 | 0 | 1.4E-06  |
| 54.4  | 100    | 95.3839  | 34843 | 65 | 5.15E-06 | 0 | 1.76E-05 |
| 5     | 100    | 80.1923  | 28547 | 36 | 0.003962 | 0 | 0.000455 |
| 9.8   | 100    | 77.4611  | 28779 | 39 | 0.000479 | 0 | 0.000367 |
| 41.1  | 72.656 | 77.3497  | 28736 | 48 | 6.6E-05  | 0 | 3.25E-06 |
| 7.6   | 77.387 | 141.2143 | 54566 | 49 | 0.00041  | 0 | 6.34E-05 |
| 52.4  | 100    | 76.9541  | 28587 | 86 | 1.12E-08 | 0 | 2.42E-09 |
| 27.9  | 42.474 | 140.8397 | 54336 | 58 | 6.52E-05 | 0 | 6.5E-09  |
| 44.9  | 100    | 23.8125  | 8740  | 18 | 0.606441 | 0 | 5.87E-05 |
| 52.5  | 38.548 | 61.5788  | 22380 | 32 | 0.016949 | 0 | 0.000189 |
| 93.2  | 19.132 | 140.9656 | 54411 | 89 | 5.69E-08 | 0 | 1.09E-14 |

|       |        |          |       |    |          |          |          |
|-------|--------|----------|-------|----|----------|----------|----------|
| 40.7  | 61.319 | 140.9694 | 54414 | 74 | 1.55E-06 | 0        | 4.98E-11 |
| 61    | 15.345 | 61.6348  | 22401 | 59 | 3.34E-05 | 0        | 1.03E-08 |
| 91    | 6.398  | 62.7208  | 22827 | 17 | 0.48427  | 0        | 0.000237 |
| 57    | 7.69   | 63.2414  | 23032 | 21 | 0.207665 | 0        | 0.000104 |
| 93    | 19.605 | 61.1325  | 22207 | 17 | 0.534963 | 0        | 0.001215 |
| 20.2  | 100    | 61.1027  | 22195 | 49 | 0.00037  | 0        | 2.64E-05 |
| 55.1  | 26.951 | 61.0762  | 22184 | 32 | 0.015594 | 0        | 7.81E-05 |
| 24.7  | 100    | 89.9139  | 32552 | 43 | 0.001566 | 0        | 0.000147 |
| 75.6  | 7.816  | 61.0228  | 22162 | 51 | 0.000197 | 0        | 7.83E-08 |
| 21    | 100    | 69.1854  | 25317 | 41 | 0.000267 | 0        | 0.000245 |
| 54.3  | 37.511 | 68.6823  | 25127 | 52 | 1.6E-05  | 0        | 3.5E-05  |
| 31.9  | 100    | 68.6202  | 25104 | 88 | 4.54E-09 | 0        | 1.69E-09 |
| 50.5  | 7.468  | 68.178   | 24937 | 56 | 7.12E-06 | 0        | 1.46E-05 |
| 63.8  | 28.96  | 68.1186  | 24916 | 74 | 1.09E-07 | 0        | 3.12E-08 |
| 53.8  | 15.545 | 67.6742  | 24745 | 54 | 1.15E-05 | 0        | 3.16E-05 |
| 60    | 36.475 | 67.6144  | 24721 | 81 | 2.02E-08 | 0        | 3.97E-08 |
| 41.5  | 100    | 65.3071  | 23840 | 40 | 0.002411 | 0        | 1.12E-05 |
| 33.1  | 100    | 65.8084  | 24030 | 39 | 0.003115 | 0        | 1.9E-05  |
| 61.8  | 40.147 | 64.3016  | 23440 | 37 | 0.004737 | 0        | 2.51E-06 |
| 4.1   | 100    | 65.4589  | 23900 | 55 | 2.14E-06 | 0        | 0.000652 |
| 59.7  | 64.193 | 64.806   | 23640 | 27 | 0.046678 | 0        | 1.94E-05 |
| 90.6  | 91.527 | 63.5951  | 23171 | 17 | 0.497079 | 0        | 0.001494 |
| 37    | 100    | 67.1724  | 24551 | 30 | 0.002434 | 0        | 0.0012   |
| 74.3  | 23.543 | 61.2081  | 22122 | 20 | 0.430444 | 0.000141 | 0.001715 |
| 13.8  | 100    | 73.3563  | 25575 | 40 | 0.003216 | 0.000141 | 0.00159  |
| 18.1  | 100    | 66.3091  | 24214 | 31 | 0.021567 | 0.000141 | 0.001771 |
| 30.5  | 100    | 82.472   | 33594 | 37 | 0.007513 | 0.000141 | 0.001576 |
| 67.5  | 100    | 49.0649  | 17772 | 57 | 2.7E-05  | 0.000141 | 0.00169  |
| 21    | 100    | 95.4869  | 34875 | 39 | 0.002039 | 0.000273 | 0.002    |
| 2.3   | 100    | 117.1194 | 43823 | 39 | 0.004062 | 0.000273 | 0.002019 |
| 91.9  | 100    | 44.7695  | 16082 | 58 | 1.89E-05 | 0.000273 | 0.002109 |
| 12.3  | 100    | 59.625   | 21857 | 59 | 3.46E-05 | 0.000273 | 0.002102 |
| 170.6 | 11.004 | 18.1841  | 6214  | 41 | 0.002601 | 0.000273 | 0.001846 |
| 41.5  | 100    | 39.6363  | 13638 | 22 | 0.19939  | 0.000273 | 0.001968 |
| 0.7   | 100    | 123.1806 | 50596 | 45 | 0.00087  | 0.000273 | 0.001833 |
| 23.6  | 100    | 51.1652  | 18577 | 56 | 3.18E-05 | 0.000407 | 0.002135 |
| 4.5   | 100    | 40.3127  | 14118 | 18 | 0.026883 | 0.000525 | 0.002589 |
| 27.1  | 100    | 47.7579  | 15347 | 25 | 0.143985 | 0.000525 | 0.0024   |
| 4.2   | 100    | 77.8515  | 28919 | 22 | 0.026882 | 0.000525 | 0.002455 |
| 119.9 | 2.452  | 64.25    | 23732 | 49 | 0.000448 | 0.000525 | 0.002275 |
| 140.6 | 45.197 | 54.2354  | 19620 | 37 | 0.002786 | 0.000525 | 0.002199 |
| 35.1  | 29.469 | 62.5934  | 23053 | 34 | 0.022075 | 0.000525 | 0.002475 |
| 13.9  | 100    | 60.1385  | 22067 | 60 | 3.01E-05 | 0.000525 | 0.002625 |
| 34.8  | 100    | 62.5593  | 22659 | 32 | 0.008993 | 0.000525 | 0.002313 |
| 4.3   | 100    | 118.627  | 44353 | 32 | 0.021407 | 0.000525 | 0.002542 |
| 0.9   | 100    | 137.8251 | 56391 | 36 | 0.004351 | 0.000525 | 0.00253  |
| 7.2   | 100    | 71.3272  | 24743 | 48 | 0.000406 | 0.000525 | 0.002327 |
| 138.9 | 4.072  | 67.9063  | 24877 | 48 | 0.000489 | 0.00065  | 0.002704 |
| 29.2  | 100    | 44.2632  | 15877 | 56 | 2.89E-05 | 0.00065  | 0.002767 |
| 4.4   | 100    | 27.3237  | 8239  | 30 | 0.00325  | 0.000758 | 0.003162 |
| 24.3  | 100    | 61.0523  | 22056 | 30 | 0.012282 | 0.000758 | 0.00318  |
| 2.4   | 37.489 | 123.725  | 46875 | 30 | 0.042136 | 0.000758 | 0.002933 |

|       |        |          |       |    |          |          |          |
|-------|--------|----------|-------|----|----------|----------|----------|
| 0     | 100    | 16.7008  | 4764  | 43 | 8.71E-05 | 0.000758 | 0.003102 |
| 77.5  | 100    | 33.8451  | 10369 | 49 | 0.000467 | 0.000758 | 0.002852 |
| 84.4  | 100    | 18.2322  | 5569  | 32 | 0.020742 | 0.000758 | 0.003059 |
| 34.2  | 100    | 45.1768  | 14377 | 25 | 0.160811 | 0.000758 | 0.003014 |
| 63.7  | 7.612  | 70.6812  | 26157 | 43 | 0.001202 | 0.000758 | 0.002778 |
| 4.7   | 100    | 40.7375  | 13876 | 54 | 7.16E-05 | 0.000758 | 0.002785 |
| 29.2  | 100    | 47.4687  | 15243 | 56 | 2.7E-05  | 0.000758 | 0.003135 |
| 13    | 100    | 107.6241 | 38713 | 44 | 0.000732 | 0.000758 | 0.00283  |
| 12.7  | 100    | 108.1278 | 38871 | 40 | 0.001811 | 0.000758 | 0.002969 |
| 25.4  | 100    | 51.093   | 16585 | 29 | 0.010319 | 0.000758 | 0.002892 |
| 12    | 100    | 46.8773  | 16797 | 28 | 0.00402  | 0.000868 | 0.003596 |
| 126.9 | 100    | 18.3332  | 5939  | 35 | 0.010719 | 0.000868 | 0.003259 |
| 59    | 100    | 63.3705  | 21476 | 34 | 0.010961 | 0.000868 | 0.003461 |
| 3.2   | 100    | 116.1154 | 44838 | 23 | 0.121448 | 0.000868 | 0.003297 |
| 13    | 100    | 107.6241 | 38713 | 44 | 0.000732 | 0.000868 | 0.003558 |
| 6.5   | 100    | 70.1755  | 25941 | 36 | 0.006023 | 0.000951 | 0.004232 |
| 29.7  | 100    | 46.7932  | 16767 | 43 | 0.001039 | 0.000951 | 0.003633 |
| 26.8  | 100    | 50.6351  | 18368 | 56 | 2.59E-05 | 0.000951 | 0.004314 |
| 77.2  | 100    | 75.418   | 28034 | 42 | 0.001273 | 0.000951 | 0.003745 |
| 70.8  | 20.206 | 63.8001  | 23250 | 16 | 0.605675 | 0.000951 | 0.004585 |
| 11.5  | 100    | 114.2519 | 44012 | 14 | 1.194448 | 0.000951 | 0.004059 |
| 4.7   | 100    | 130.1633 | 48371 | 36 | 0.009419 | 0.000951 | 0.004356 |
| 10.1  | 100    | 57.8142  | 20950 | 20 | 0.254694 | 0.001022 | 0.004854 |
| 34.4  | 100    | 77.1694  | 28774 | 23 | 0.116934 | 0.001022 | 0.005252 |
| 27.4  | 100    | 50.1339  | 18183 | 44 | 0.000343 | 0.001022 | 0.00573  |
| 20.1  | 100    | 79.1439  | 29875 | 47 | 0.00052  | 0.001022 | 0.005613 |
| 72    | 100    | 42.7687  | 13508 | 43 | 0.002058 | 0.001022 | 0.004868 |
| 46.7  | 100    | 42.7462  | 13482 | 15 | 1.490448 | 0.001022 | 0.005124 |
| 184.4 | 100    | 44.7489  | 14226 | 43 | 0.001966 | 0.001022 | 0.004765 |
| 8     | 100    | 108.6323 | 39027 | 35 | 0.005875 | 0.001022 | 0.005275 |
| 26.1  | 100    | 73.8543  | 25795 | 31 | 0.022863 | 0.001022 | 0.005608 |
| 0.9   | 100    | 98.7172  | 40533 | 27 | 0.065046 | 0.001022 | 0.005324 |
| 16    | 100    | 50.6377  | 18265 | 33 | 0.005484 | 0.001022 | 0.00533  |
| 43.2  | 100    | 59.8145  | 21540 | 33 | 0.008011 | 0.001022 | 0.005782 |
| 2     | 100    | 119.8354 | 46373 | 20 | 0.411286 | 0.001022 | 0.005007 |
| 17.2  | 100    | 68.7343  | 25569 | 22 | 0.007102 | 0.001022 | 0.005229 |
| 35.3  | 100    | 46.986   | 15071 | 50 | 0.000144 | 0.001022 | 0.005073 |
| 1.6   | 100    | 122.6201 | 47605 | 27 | 0.076682 | 0.001022 | 0.004852 |
| 12.8  | 100    | 59.3546  | 21756 | 32 | 0.017146 | 0.001022 | 0.004971 |
| 8.2   | 100    | 80.1768  | 28540 | 52 | 0.000109 | 0.001022 | 0.005462 |
| 7.9   | 100    | 17.5261  | 5548  | 25 | 0.012636 | 0.001022 | 0.005439 |
| 25.3  | 100    | 43.6002  | 15075 | 21 | 0.409115 | 0.001022 | 0.00518  |
| 22.7  | 100    | 68.4728  | 23558 | 33 | 0.012216 | 0.001022 | 0.00518  |
| 36.7  | 100    | 49.5689  | 17969 | 44 | 0.000497 | 0.001114 | 0.006357 |
| 77.2  | 100    | 47.299   | 16961 | 35 | 0.005642 | 0.001114 | 0.006104 |
| 68.6  | 88.665 | 56.1624  | 20484 | 0  | 43.05128 | 0.001114 | 0.005892 |
| 8     | 100    | 108.6323 | 39027 | 35 | 0.005875 | 0.001114 | 0.006236 |
| 3.4   | 100    | 120.2111 | 44008 | 17 | 0.368061 | 0.00121  | 0.006578 |
| 9.8   | 100    | 70.7986  | 24521 | 23 | 0.125259 | 0.00121  | 0.006695 |
| 19    | 100    | 18.4828  | 5404  | 32 | 0.01809  | 0.00121  | 0.006452 |
| 6     | 100    | 24.0965  | 7122  | 46 | 0.000517 | 0.001308 | 0.00698  |
| 5.9   | 100    | 121.3891 | 47068 | 19 | 0.409267 | 0.00141  | 0.007371 |



|       |        |          |       |    |          |          |          |
|-------|--------|----------|-------|----|----------|----------|----------|
| 4.2   | 100    | 67.7235  | 25174 | 22 | 0.006126 | 0.00141  | 0.00746  |
| 0.7   | 100    | 103.4483 | 42455 | 22 | 0.169589 | 0.001498 | 0.007952 |
| 132.9 | 100    | 44.4847  | 15417 | 38 | 0.00702  | 0.001498 | 0.007807 |
| 1.3   | 100    | 91.7043  | 34255 | 21 | 0.378946 | 0.001498 | 0.007473 |
| 45.9  | 40.97  | 57.6202  | 21079 | 54 | 9.07E-05 | 0.001498 | 0.007566 |
| 8.8   | 100    | 98.985   | 40656 | 22 | 0.222048 | 0.001498 | 0.007897 |
| 17.3  | 100    | 62.0862  | 22580 | 21 | 0.020584 | 0.001498 | 0.007869 |
| 27.5  | 100    | 62.0275  | 22555 | 20 | 0.022973 | 0.001498 | 0.00802  |
| 142.2 | 53.361 | 62.5073  | 23017 | 15 | 1.606012 | 0.001576 | 0.008571 |
| 8.7   | 100    | 61.5241  | 22359 | 21 | 0.022297 | 0.001576 | 0.008652 |
| 280.8 | 95.103 | 48.5587  | 17569 | 51 | 9.62E-05 | 0.001576 | 0.008228 |
| 3.8   | 100    | 64.9555  | 23703 | 46 | 1.91E-05 | 0.001677 | 0.008926 |
| 12.7  | 100    | 62.5934  | 22772 | 20 | 0.027038 | 0.001677 | 0.008899 |
| 0.6   | 100    | 122.8512 | 45865 | 25 | 0.103282 | 0.001758 | 0.009479 |
| 146.2 | 100    | 17.4331  | 5207  | 4  | 1.638583 | 0.001945 | 0.0102   |
| 25.8  | 100    | 48.7261  | 17047 | 22 | 0.065988 | 0.001945 | 0.01019  |
| 3.6   | 100    | 23.7689  | 7090  | 45 | 0.000731 | 0.002012 | 0.01089  |
| 26.9  | 100    | 64.0993  | 23364 | 23 | 0.138283 | 0.002012 | 0.01062  |
| 61.6  | 100    | 45.9682  | 16452 | 38 | 0.003051 | 0.002012 | 0.01099  |
| 72.7  | 56.073 | 63.0907  | 22970 | 15 | 0.873242 | 0.002012 | 0.01026  |
| 58.1  | 42.553 | 62.5842  | 22768 | 12 | 1.585791 | 0.002012 | 0.01067  |
| 50.7  | 44.143 | 62.0818  | 22578 | 16 | 0.684299 | 0.002012 | 0.0109   |
| 20.2  | 100    | 60.5751  | 21985 | 25 | 0.096021 | 0.002012 | 0.01088  |
| 14.5  | 100    | 60.2697  | 22121 | 28 | 0.025053 | 0.002012 | 0.0105   |
| 65.4  | 100    | 41.259   | 12958 | 16 | 0.812173 | 0.002012 | 0.0103   |
| 25.1  | 100    | 40.4424  | 13934 | 15 | 1.549947 | 0.002012 | 0.01027  |
| 73.1  | 21.278 | 74.6726  | 27991 | 43 | 0.00144  | 0.002012 | 0.01071  |
| 7.3   | 100    | 56.1059  | 20301 | 39 | 0.004797 | 0.002079 | 0.01165  |
| 2.3   | 100    | 57.8204  | 23125 | 38 | 0.005801 | 0.002079 | 0.01186  |
| 19.5  | 100    | 47.579   | 15284 | 46 | 0.000858 | 0.002079 | 0.01227  |
| 2.9   | 100    | 115.1086 | 44384 | 23 | 0.128665 | 0.002079 | 0.01164  |
| 18.8  | 100    | 70.9377  | 26455 | 33 | 0.013413 | 0.002257 | 0.01285  |
| 3.7   | 100    | 114.0195 | 43906 | 16 | 0.617389 | 0.002315 | 0.0134   |
| 162.2 | 8.941  | 63.016   | 23236 | 20 | 0.438221 | 0.002315 | 0.01362  |
| 66.7  | 100    | 48.0657  | 15481 | 19 | 0.453774 | 0.002315 | 0.0136   |
| 2.8   | 100    | 113.0084 | 41019 | 23 | 0.127095 | 0.002315 | 0.01362  |
| 6.8   | 100    | 96.342   | 34275 | 52 | 9.89E-05 | 0.002315 | 0.01334  |
| 90.5  | 4.269  | 45.4676  | 16247 | 38 | 0.002789 | 0.002376 | 0.01539  |
| 21.7  | 100    | 59.7426  | 21910 | 25 | 0.088875 | 0.002376 | 0.01433  |
| 56.3  | 34.28  | 40.7273  | 13871 | 36 | 0.00509  | 0.002543 | 0.01554  |
| 6.1   | 100    | 77.8765  | 28607 | 43 | 0.00088  | 0.002543 | 0.01597  |
| 25.6  | 100    | 58.1226  | 21278 | 44 | 0.000881 | 0.002636 | 0.01637  |
| 3.6   | 100    | 87.17    | 32469 | 28 | 0.075467 | 0.002719 | 0.01681  |
| 16.9  | 100    | 49.2311  | 17302 | 25 | 0.031452 | 0.002719 | 0.01669  |
| 63.3  | 100    | 45.2928  | 15677 | 21 | 0.253238 | 0.002777 | 0.01818  |
| 3.1   | 100    | 71.4458  | 26372 | 16 | 0.089361 | 0.002777 | 0.01767  |
| 59.8  | 100    | 58.4461  | 20961 | 35 | 0.013144 | 0.002777 | 0.01754  |
| 1.4   | 100    | 118.8318 | 45944 | 21 | 0.340169 | 0.002777 | 0.01737  |
| 2.6   | 100    | 132.2481 | 51603 | 27 | 0.04572  | 0.002777 | 0.01771  |
| 11.4  | 100    | 95.8922  | 35006 | 28 | 0.025265 | 0.002843 | 0.01901  |
| 6.4   | 100    | 62.0562  | 22455 | 27 | 0.026932 | 0.002843 | 0.01833  |
| 2.2   | 100    | 133.6653 | 52224 | 23 | 0.108198 | 0.00302  | 0.01963  |

|       |        |          |       |    |          |          |         |
|-------|--------|----------|-------|----|----------|----------|---------|
| 33.9  | 100    | 17.7486  | 5656  | 6  | 10.22991 | 0.003096 | 0.02029 |
| 1.5   | 100    | 121.3725 | 47060 | 14 | 1.553195 | 0.003096 | 0.01964 |
| 4.2   | 100    | 115.6122 | 44607 | 24 | 0.112821 | 0.003178 | 0.02076 |
| 55.8  | 100    | 31.5541  | 11949 | 54 | 3.04E-05 | 0.003178 | 0.02053 |
| 69.2  | 100    | 44.1033  | 15267 | 15 | 1.342651 | 0.003254 | 0.02082 |
| 6.8   | 100    | 79.4531  | 29515 | 42 | 0.000583 | 0.003254 | 0.02084 |
| 21.9  | 46.931 | 67.9501  | 24895 | 30 | 0.033826 | 0.00337  | 0.02349 |
| 3.8   | 100    | 128.2396 | 52631 | 25 | 0.121264 | 0.00337  | 0.02419 |
| 1.2   | 100    | 27.1861  | 8972  | 17 | 0.074653 | 0.00337  | 0.02307 |
| 55.2  | 68.862 | 62.2843  | 22656 | 16 | 0.755725 | 0.00337  | 0.0234  |
| 4.5   | 100    | 28.9127  | 8739  | 18 | 0.067463 | 0.00337  | 0.02198 |
| 8     | 100    | 60.9738  | 22142 | 10 | 0.225652 | 0.003533 | 0.02446 |
| 1.5   | 100    | 129.7787 | 47826 | 17 | 0.613772 | 0.003674 | 0.02562 |
| 11.1  | 100    | 38.2267  | 13122 | 39 | 0.005625 | 0.003674 | 0.02551 |
| 0.7   | 100    | 119.0058 | 46020 | 12 | 1.685585 | 0.003674 | 0.02534 |
| 12.2  | 100    | 94.9828  | 34707 | 27 | 0.032201 | 0.003736 | 0.02725 |
| 7.3   | 100    | 56.1059  | 20301 | 39 | 0.004797 | 0.003736 | 0.02664 |
| 3     | 100    | 57.3113  | 22913 | 41 | 0.003508 | 0.00382  | 0.02786 |
| 8.9   | 100    | 64.2626  | 23618 | 38 | 0.004079 | 0.004049 | 0.02919 |
| 32.3  | 100    | 49.5124  | 15983 | 45 | 0.000988 | 0.004192 | 0.02999 |
| 0     | 100    | 67.4511  | 25057 | 18 | 0.017881 | 0.004192 | 0.03024 |
| 2.1   | 100    | 126.5846 | 47142 | 33 | 0.014051 | 0.004344 | 0.03134 |
| 14.7  | 100    | 56.5713  | 20655 | 23 | 0.236039 | 0.004504 | 0.03214 |
| 14.4  | 100    | 81.9868  | 28518 | 30 | 0.046714 | 0.004643 | 0.03265 |
| 99.2  | 6.411  | 44.9618  | 16047 | 37 | 0.003566 | 0.004803 | 0.03421 |
| 4.2   | 100    | 131.6228 | 51323 | 17 | 0.403349 | 0.00496  | 0.03453 |
| 21.3  | 100    | 56.0032  | 19984 | 33 | 0.011561 | 0.005271 | 0.03594 |
| 68.6  | 100    | 43.5218  | 15498 | 4  | 1.546922 | 0.005325 | 0.03641 |
| 49.2  | 100    | 38.7617  | 12100 | 11 | 3.593269 | 0.005478 | 0.03803 |
| 10.6  | 100    | 65.4447  | 22052 | 22 | 0.108886 | 0.005478 | 0.03769 |
| 13.7  | 100    | 64.0864  | 23663 | 21 | 0.288081 | 0.005618 | 0.0391  |
| 29.2  | 100    | 49.8342  | 17540 | 24 | 0.035422 | 0.005687 | 0.03944 |
| 40.1  | 100    | 45.2524  | 14405 | 28 | 0.067739 | 0.005687 | 0.03979 |
| 3.4   | 100    | 97.4423  | 39979 | 25 | 0.095526 | 0.005687 | 0.03958 |
| 11.1  | 100    | 66.2523  | 24197 | 29 | 0.042757 | 0.00573  | 0.04133 |
| 0.4   | 100    | 111.767  | 42977 | 17 | 0.682315 | 0.00573  | 0.04086 |
| 6.9   | 100    | 22.159   | 6476  | 14 | 1.004212 | 0.005792 | 0.04217 |
| 7.4   | 100    | 69.1226  | 25292 | 20 | 0.033411 | 0.005865 | 0.04313 |
| 149.4 | 2.792  | 62.8642  | 21276 | 39 | 0.004538 | 0.005865 | 0.04329 |
| 20.6  | 49.474 | 48.0828  | 15464 | 52 | 0.000196 | 0.00599  | 0.04483 |
| 5.1   | 100    | 85.7536  | 31992 | 12 | 2.329743 | 0.00599  | 0.04381 |
| 15.7  | 100    | 74.1699  | 27786 | 25 | 0.086418 | 0.00599  | 0.04523 |
| 13.9  | 100    | 56.069   | 20448 | 19 | 0.538257 | 0.00599  | 0.04416 |
| 6.1   | 100    | 65.5761  | 23943 | 9  | 0.259271 | 0.006428 | 0.04695 |
| 9.2   | 100    | 63.0944  | 22972 | 14 | 0.118099 | 0.006428 | 0.04782 |
| 6.3   | 100    | 57.1921  | 20440 | 21 | 0.142699 | 0.006497 | 0.04806 |
| 1.5   | 100    | 120.1484 | 46505 | 10 | 2.538489 | 0.006721 | 0.04937 |
| 87    | 100    | 18.6984  | 6473  | 16 | 0.750153 | 0.006991 | 0.05176 |
| 2.9   | 100    | 124.7301 | 48476 | 15 | 0.815753 | 0.00728  | 0.0533  |
| 3.5   | 100    | 55.7792  | 18471 | 31 | 0.00917  | 0.007572 | 0.05455 |
| 3.5   | 100    | 55.7792  | 18471 | 31 | 0.00917  | 0.007572 | 0.05455 |
| 3.5   | 100    | 55.7792  | 18471 | 31 | 0.00917  | 0.007572 | 0.05455 |

|       |        |          |       |     |          |          |          |
|-------|--------|----------|-------|-----|----------|----------|----------|
| 0.5   | 100    | 94.9717  | 33724 | 22  | 0.186706 | 0.007636 | 0.05461  |
| 1.8   | 100    | 132.7515 | 51825 | 14  | 0.82521  | 0.007785 | 0.05552  |
| 2.1   | 100    | 132.2616 | 51609 | 14  | 0.993863 | 0.007836 | 0.05604  |
| 10.1  | 100    | 23.6784  | 8684  | 33  | 0.012593 | 0.0081   | 0.05952  |
| 12.1  | 100    | 70.164   | 25936 | 24  | 0.087263 | 0.0081   | 0.05932  |
| 5     | 100    | 110.4631 | 45403 | 18  | 0.61179  | 0.008361 | 0.06268  |
| 155.1 | 0.632  | 44.2105  | 15309 | 44  | 0.001407 | 0.008559 | 0.06422  |
| 42.5  | 100    | 45.84    | 15950 | 23  | 0.207868 | 0.00861  | 0.06511  |
| 5.1   | 100    | 65.0368  | 23735 | 12  | 0.167589 | 0.008997 | 0.07009  |
| 8.6   | 100    | 56.5043  | 20188 | 17  | 0.544192 | 0.009069 | 0.0704   |
| 24.6  | 100    | 39.2648  | 12270 | 25  | 0.138506 | 0.009141 | 0.07058  |
| 135.3 | 100    | 38.2061  | 13115 | 32  | 0.024429 | 0.009291 | 0.07074  |
| 0.9   | 100    | 91.4457  | 34163 | 14  | 1.862681 | 0.009436 | 0.07125  |
| 0.7   | 100    | 120.8659 | 46831 | 12  | 2.589073 | 0.009514 | 0.07484  |
| 0.4   | 100    | 122.7088 | 47646 | 3   | 13.72679 | 0.009514 | 0.07594  |
| 8.4   | 100    | 71.3433  | 26325 | 15  | 0.112155 | 0.009514 | 0.0758   |
| 11.4  | 100    | 50.1325  | 18068 | 21  | 0.076804 | 0.009514 | 0.07541  |
| 16.2  | 100    | 51.718   | 18702 | 21  | 0.02783  | 0.009655 | 0.07704  |
| 7.5   | 100    | 66.0969  | 24131 | 15  | 0.088506 | 0.009764 | 0.0784   |
| 33    | 100    | 44.4571  | 15853 | 27  | 0.034615 | 0.009818 | 0.07959  |
| 2.2   | 100    | 110.5189 | 45429 | 16  | 1.081035 | 0.009818 | 0.07936  |
| 27.7  | 100    | 46.8231  | 15008 | 33  | 0.01831  | 0.009858 | 0.08022  |
| 19.8  | 100    | 55.3161  | 20007 | 20  | 0.050848 | 0.009858 | 0.08035  |
| 13.7  | 100    | 69.9527  | 25852 | 59  | 4.19E-05 | 0        | 0.000165 |
| 11.2  | 100    | 71.9947  | 26676 | 52  | 0.000195 | 0        | 1.6E-05  |
| 25.7  | 74.503 | 71.9203  | 26648 | 76  | 7.92E-07 | 0        | 2.6E-08  |
| 12.5  | 100    | 71.4904  | 26475 | 44  | 0.001194 | 0        | 2.05E-05 |
| 120   | 8.014  | 23.71    | 7668  | 40  | 0.003421 | 0        | 8.3E-07  |
| 6.9   | 100    | 23.5245  | 7596  | 53  | 0.000199 | 0        | 0.000996 |
| 36.8  | 100    | 59.2636  | 21710 | 37  | 0.00566  | 0        | 0.000326 |
| 89.1  | 69.159 | 51.7649  | 18813 | 47  | 0.000487 | 0        | 0.000961 |
| 13.1  | 100    | 51.3618  | 18652 | 48  | 0.000388 | 0        | 0.000292 |
| 111.2 | 100    | 17.4401  | 5506  | 47  | 0.000728 | 0        | 3.8E-05  |
| 48.5  | 100    | 70.2676  | 24300 | 35  | 0.009692 | 0        | 1.94E-05 |
| 11.9  | 100    | 70.3791  | 24347 | 21  | 0.218051 | 0        | 0.001194 |
| 77    | 100    | 60.881   | 20286 | 23  | 0.033102 | 0        | 0.000701 |
| 16.4  | 100    | 61.0256  | 20339 | 30  | 0.009846 | 0        | 0.001382 |
| 139.7 | 16.391 | 61.3827  | 20477 | 29  | 0.008914 | 0        | 0.000162 |
| 61.6  | 100    | 140.6254 | 55286 | 112 | 2.39E-10 | 0        | 5.99E-13 |
| 40.6  | 100    | 93.8677  | 33313 | 44  | 0.000849 | 0        | 0.001055 |
| 55.1  | 100    | 88.8221  | 33318 | 54  | 0.000167 | 0        | 7.2E-05  |
| 55.2  | 100    | 81.2648  | 30182 | 60  | 1.57E-05 | 0        | 0.000142 |
| 105.8 | 46.878 | 140.5673 | 55252 | 86  | 1.14E-07 | 0        | 3.13E-09 |
| 287.4 | 62.758 | 140.637  | 52348 | 91  | 3.53E-08 | 0        | 8.11E-11 |
| 55.7  | 100    | 140.5864 | 55263 | 119 | 4.87E-11 | 0        | 1.08E-11 |
| 76.4  | 100    | 140.4157 | 52225 | 96  | 9.42E-09 | 0        | 3.86E-10 |
| 111   | 29.083 | 140.401  | 52218 | 76  | 8.14E-07 | 0        | 1.11E-09 |
| 22.3  | 100    | 52.0288  | 18828 | 44  | 0.001613 | 0        | 0.000804 |
| 8.8   | 100    | 68.704   | 25557 | 64  | 3.62E-06 | 0        | 0.000826 |
| 33.6  | 7.282  | 86.254   | 32656 | 65  | 1.05E-05 | 0        | 0.000154 |
| 43    | 100    | 140.5921 | 54186 | 84  | 1.71E-07 | 0        | 5.92E-08 |
| 79.5  | 100    | 140.5428 | 54161 | 102 | 2.81E-09 | 0        | 3.68E-12 |

|       |        |          |       |    |          |          |          |
|-------|--------|----------|-------|----|----------|----------|----------|
| 245.2 | 34.835 | 140.3358 | 54059 | 47 | 2.74E-05 | 0        | 2.1E-09  |
| 124.7 | 100    | 140.3224 | 54052 | 39 | 0.000158 | 0        | 1.4E-07  |
| 4.6   | 100    | 51.1366  | 18465 | 52 | 5.81E-06 | 0        | 4.97E-06 |
| 107   | 68.512 | 54.4384  | 19372 | 41 | 0.001297 | 0        | 0.000162 |
| 0.5   | 100    | 126.9128 | 48228 | 52 | 0.000268 | 0        | 7.36E-07 |
| 3.2   | 100    | 114.5861 | 42898 | 32 | 0.02395  | 0        | 0.000527 |
| 28.7  | 10.894 | 78.8263  | 29464 | 67 | 4.97E-06 | 0        | 1.07E-06 |
| 47.4  | 100    | 48.1986  | 18960 | 21 | 0.258858 | 0        | 0.001119 |
| 18.2  | 100    | 79.2693  | 28142 | 42 | 0.002018 | 0        | 0.000182 |
| 26.2  | 32.118 | 71.0441  | 28823 | 54 | 0.000119 | 0        | 6.64E-06 |
| 14.9  | 100    | 141.4808 | 54720 | 53 | 0.000211 | 0        | 2.39E-06 |
| 153.9 | 100    | 141.4764 | 54718 | 77 | 7.57E-07 | 0        | 1.02E-07 |
| 34    | 100    | 141.4334 | 54692 | 80 | 2.99E-07 | 0        | 4.58E-10 |
| 0     | 100    | 122.9944 | 43531 | 71 | 1.03E-06 | 0        | 4.98E-05 |
| 0     | 100    | 91.6136  | 33944 | 67 | 4.39E-08 | 0        | 3.02E-05 |
| 18.6  | 100    | 141.7725 | 54883 | 93 | 1.06E-09 | 0        | 3.77E-14 |
| 13.5  | 100    | 97.2612  | 35614 | 21 | 0.056502 | 0        | 0.001044 |
| 8.6   | 36.27  | 141.7652 | 54879 | 89 | 3.3E-09  | 0        | 1.77E-10 |
| 273.8 | 61.725 | 20.7021  | 7401  | 34 | 0.006054 | 0        | 0.000446 |
| 16.3  | 100    | 96.621   | 35347 | 37 | 0.001355 | 0        | 2.69E-06 |
| 18.1  | 100    | 97.13    | 35559 | 33 | 0.00323  | 0        | 0.000102 |
| 2.8   | 100    | 61.7635  | 22453 | 62 | 1.37E-07 | 0        | 3.34E-06 |
| 117.1 | 100    | 89.8373  | 32516 | 61 | 2.01E-05 | 0        | 0.001556 |
| 52.4  | 15.149 | 71.1909  | 26103 | 85 | 7.04E-08 | 0        | 5.37E-08 |
| 43.3  | 24.566 | 71.2022  | 26107 | 54 | 9.21E-05 | 0        | 0.000302 |
| 84.8  | 100    | 69.4694  | 25669 | 47 | 0.000658 | 0.000141 | 0.001723 |
| 19.7  | 100    | 69.4504  | 25661 | 28 | 0.056865 | 0.000141 | 0.001716 |
| 15.6  | 100    | 60.781   | 21895 | 39 | 0.004355 | 0.000141 | 0.001638 |
| 15.9  | 100    | 15.9341  | 4500  | 39 | 0.002866 | 0.000273 | 0.001878 |
| 28.6  | 100    | 52.9233  | 17272 | 54 | 8.96E-05 | 0.000525 | 0.002468 |
| 40.6  | 100    | 93.8721  | 33315 | 37 | 0.003802 | 0.00065  | 0.002717 |
| 20.8  | 100    | 32.3414  | 11127 | 40 | 0.0025   | 0.000758 | 0.003162 |
| 17.8  | 100    | 55.9816  | 18440 | 31 | 0.009896 | 0.000758 | 0.003156 |
| 14.1  | 100    | 85.9969  | 32535 | 31 | 0.022488 | 0.000868 | 0.003324 |
| 23.6  | 100    | 51.294   | 16659 | 57 | 5.76E-05 | 0.000868 | 0.00332  |
| 47.1  | 100    | 32.186   | 12217 | 27 | 0.091259 | 0.000868 | 0.003415 |
| 77.3  | 100    | 60.8518  | 24417 | 48 | 0.000547 | 0.000868 | 0.003371 |
| 26.5  | 100    | 48.1925  | 18957 | 18 | 0.493793 | 0.000951 | 0.004588 |
| 14.4  | 100    | 69.4313  | 25376 | 28 | 0.04247  | 0.000951 | 0.00418  |
| 17.6  | 100    | 39.5209  | 14090 | 25 | 0.065078 | 0.000951 | 0.003853 |
| 7.8   | 100    | 47.12    | 17476 | 41 | 0.002148 | 0.000951 | 0.004089 |
| 102.4 | 100    | 32.434   | 11168 | 39 | 0.003395 | 0.001022 | 0.005622 |
| 12.8  | 100    | 65.2686  | 21982 | 20 | 0.211869 | 0.001022 | 0.005642 |
| 8.3   | 100    | 17.3847  | 5010  | 19 | 0.503674 | 0.001114 | 0.006199 |
| 15.8  | 100    | 121.8951 | 46088 | 26 | 0.063021 | 0.00121  | 0.006473 |
| 21.7  | 100    | 65.2195  | 21964 | 37 | 0.006431 | 0.00121  | 0.006833 |
| 20.5  | 100    | 31.5451  | 10649 | 39 | 0.002424 | 0.00121  | 0.006756 |
| 180   | 100    | 31.5789  | 10665 | 25 | 0.060656 | 0.001308 | 0.007046 |
| 77.9  | 100    | 54.8231  | 19517 | 39 | 0.001787 | 0.001308 | 0.006961 |
| 47.2  | 100    | 23.532   | 7599  | 19 | 0.449561 | 0.001308 | 0.007122 |
| 26.4  | 100    | 59.1528  | 19797 | 27 | 0.072811 | 0.00141  | 0.007415 |
| 26.4  | 100    | 59.1528  | 19797 | 27 | 0.072811 | 0.00141  | 0.007415 |

|       |        |          |       |    |          |          |          |
|-------|--------|----------|-------|----|----------|----------|----------|
| 1.2   | 100    | 61.2632  | 22260 | 18 | 0.002831 | 0.001498 | 0.007815 |
| 45.1  | 100    | 51.5755  | 18644 | 31 | 0.034149 | 0.001498 | 0.007701 |
| 40.2  | 100    | 58.1603  | 19431 | 22 | 0.063303 | 0.001576 | 0.008742 |
| 12.3  | 100    | 39.4044  | 15208 | 50 | 7.55E-05 | 0.001854 | 0.009708 |
| 15.1  | 100    | 53.7567  | 20135 | 41 | 0.003363 | 0.002012 | 0.01056  |
| 7.8   | 100    | 70.6896  | 25901 | 32 | 0.016543 | 0.002012 | 0.01101  |
| 3.1   | 100    | 68.8047  | 25172 | 38 | 0.001978 | 0.002012 | 0.01056  |
| 4.4   | 100    | 60.2563  | 20236 | 40 | 0.003306 | 0.002012 | 0.01077  |
| 13.1  | 100    | 29.9952  | 9090  | 19 | 0.413005 | 0.002079 | 0.01164  |
| 28.4  | 100    | 52.7461  | 19771 | 30 | 0.042587 | 0.002079 | 0.0117   |
| 66.1  | 32.02  | 97.8201  | 34852 | 46 | 8.78E-05 | 0.002079 | 0.01202  |
| 3.3   | 100    | 30.0079  | 9094  | 35 | 0.00948  | 0.002257 | 0.01283  |
| 11.7  | 100    | 92.4569  | 32747 | 41 | 0.002268 | 0.002257 | 0.01247  |
| 50.9  | 100    | 51.7666  | 18298 | 41 | 0.001642 | 0.002376 | 0.01467  |
| 22.6  | 100    | 23.2104  | 7474  | 11 | 2.863846 | 0.002543 | 0.01634  |
| 20.2  | 100    | 70.7002  | 25906 | 17 | 0.468616 | 0.002777 | 0.01746  |
| 45    | 100    | 43.0252  | 14858 | 45 | 0.000141 | 0.002777 | 0.01704  |
| 11    | 100    | 65.359   | 22017 | 24 | 0.089407 | 0.002777 | 0.01732  |
| 18.2  | 100    | 64.6993  | 21772 | 29 | 0.047677 | 0.002777 | 0.01741  |
| 6.6   | 100    | 37.8449  | 14576 | 25 | 0.081309 | 0.002843 | 0.01932  |
| 37.1  | 100    | 47.9629  | 17216 | 52 | 9.44E-05 | 0.002931 | 0.01934  |
| 25.5  | 100    | 78.7697  | 27927 | 24 | 0.124136 | 0.003096 | 0.02002  |
| 76.6  | 100    | 44.0317  | 15240 | 49 | 5.27E-05 | 0.003096 | 0.01965  |
| 14.8  | 100    | 55.6487  | 19839 | 45 | 0.000412 | 0.003254 | 0.02143  |
| 36.1  | 100    | 44.8244  | 14246 | 13 | 1.503427 | 0.003254 | 0.02119  |
| 16.2  | 100    | 33.5647  | 11897 | 12 | 1.624416 | 0.00337  | 0.02257  |
| 0     | 100    | 122.4922 | 43380 | 30 | 0.012916 | 0.00337  | 0.02392  |
| 26.9  | 100    | 56.549   | 21157 | 14 | 1.761762 | 0.00337  | 0.02201  |
| 44.1  | 100    | 36.6178  | 12640 | 33 | 0.011308 | 0.00337  | 0.02307  |
| 47.6  | 100    | 74.0429  | 25426 | 39 | 0.003681 | 0.003533 | 0.02473  |
| 23.2  | 100    | 73.4849  | 25182 | 50 | 0.000238 | 0.003533 | 0.02456  |
| 9.8   | 100    | 50.2498  | 17700 | 36 | 0.006075 | 0.003736 | 0.02777  |
| 231.5 | 22.681 | 43.5297  | 15048 | 44 | 0.000183 | 0.004124 | 0.02933  |
| 0.8   | 100    | 97.3844  | 34682 | 19 | 0.04678  | 0.004192 | 0.02997  |
| 13.4  | 100    | 44.7078  | 14205 | 29 | 0.035759 | 0.004581 | 0.03241  |
| 111.5 | 100    | 68.977   | 25323 | 43 | 0.001525 | 0.004581 | 0.03219  |
| 12.5  | 100    | 15.8913  | 4484  | 29 | 0.031423 | 0.004643 | 0.03373  |
| 12.2  | 100    | 63.7917  | 23440 | 36 | 0.006034 | 0.004643 | 0.03298  |
| 0     | 100    | 123.5315 | 43705 | 30 | 0.012083 | 0.005618 | 0.03858  |
| 12.8  | 100    | 64.0661  | 23544 | 33 | 0.012092 | 0.005687 | 0.03982  |
| 13    | 100    | 80.7585  | 29982 | 33 | 0.008401 | 0.006371 | 0.04631  |
| 7.6   | 100    | 79.3272  | 29676 | 20 | 0.243302 | 0.006926 | 0.05038  |
| 52.8  | 100    | 60.1666  | 20197 | 19 | 0.513995 | 0.00728  | 0.05304  |
| 17.3  | 100    | 54.2592  | 20325 | 28 | 0.062767 | 0.007423 | 0.0537   |
| 0.4   | 100    | 98.7145  | 38020 | 16 | 0.803889 | 0.0081   | 0.05923  |
| 5.1   | 100    | 71.7064  | 26301 | 23 | 0.111639 | 0.00971  | 0.07804  |
| 144   | 55.294 | 51.4127  | 18672 | 39 | 0.002609 | 0.009818 | 0.0793   |
| 6.5   | 100    | 49.3272  | 16001 | 39 | 0.005502 | 0        | 0.001072 |
| 16.8  | 100    | 104.8688 | 39454 | 41 | 0.003643 | 0        | 0.000229 |
| 9.8   | 100    | 66.0134  | 24295 | 73 | 6.44E-07 | 0        | 1.54E-06 |
| 2.7   | 100    | 64.081   | 23550 | 61 | 9.46E-06 | 0        | 5.05E-07 |
| 18.8  | 100    | 79.2125  | 29383 | 88 | 2.52E-08 | 0        | 1.29E-08 |

|       |        |          |       |     |          |   |          |
|-------|--------|----------|-------|-----|----------|---|----------|
| 26.2  | 100    | 78.7111  | 29186 | 48  | 0.000228 | 0 | 3.91E-06 |
| 21.7  | 31.152 | 78.7089  | 29185 | 88  | 2.59E-08 | 0 | 2.74E-11 |
| 42.1  | 100    | 78.2033  | 28987 | 54  | 5.6E-05  | 0 | 3.27E-08 |
| 10.1  | 100    | 76.7969  | 28477 | 24  | 0.182884 | 0 | 0.001073 |
| 27.8  | 100    | 74.073   | 27446 | 48  | 0.0002   | 0 | 0.00068  |
| 9.7   | 100    | 43.7084  | 13841 | 37  | 0.008346 | 0 | 0.000244 |
| 18    | 100    | 44.2131  | 14035 | 70  | 4.18E-06 | 0 | 2.28E-07 |
| 1.7   | 100    | 41.1617  | 12924 | 58  | 6.53E-05 | 0 | 0.001093 |
| 73.4  | 77.472 | 27.2773  | 8223  | 57  | 7.6E-05  | 0 | 4.07E-07 |
| 4.8   | 100    | 45.2475  | 15714 | 56  | 0.000112 | 0 | 2.76E-05 |
| 7.7   | 100    | 44.7449  | 15516 | 66  | 1.17E-05 | 0 | 7.18E-06 |
| 1.2   | 100    | 33.8745  | 10381 | 68  | 5.96E-06 | 0 | 8.26E-05 |
| 10.3  | 100    | 46.2245  | 14779 | 58  | 7.7E-05  | 0 | 1.86E-05 |
| 4.7   | 100    | 121.9364 | 45541 | 78  | 2E-07    | 0 | 3.06E-08 |
| 6.4   | 100    | 47.2377  | 15170 | 38  | 0.006426 | 0 | 0.001006 |
| 7.4   | 100    | 46.7272  | 14972 | 44  | 0.001623 | 0 | 0.000188 |
| 10.1  | 100    | 44.7156  | 14209 | 76  | 1.16E-06 | 0 | 2.5E-07  |
| 10    | 100    | 45.2193  | 14391 | 69  | 4.88E-06 | 0 | 7.66E-07 |
| 5.6   | 100    | 45.7217  | 14585 | 68  | 7.24E-06 | 0 | 1.47E-06 |
| 0.7   | 100    | 134.6356 | 49958 | 27  | 0.055583 | 0 | 0.000671 |
| 0.9   | 100    | 123.0848 | 50561 | 47  | 0.000238 | 0 | 0.000112 |
| 1.3   | 100    | 122.5813 | 50367 | 90  | 1.16E-08 | 0 | 9.85E-09 |
| 4.7   | 100    | 122.076  | 50161 | 91  | 9.72E-09 | 0 | 1.62E-09 |
| 13.5  | 32.216 | 121.5264 | 49926 | 103 | 6.2E-10  | 0 | 1.6E-12  |
| 5.9   | 100    | 121.4958 | 49914 | 65  | 3.53E-06 | 0 | 5.75E-06 |
| 0     | 100    | 123.5935 | 50763 | 34  | 0.004505 | 0 | 0.001357 |
| 16    | 100    | 82.9395  | 33774 | 47  | 0.00095  | 0 | 6.48E-06 |
| 37.1  | 62.598 | 98.0568  | 40255 | 73  | 4.74E-07 | 0 | 5.47E-10 |
| 19.3  | 31.191 | 98.0741  | 40261 | 41  | 0.000775 | 0 | 8.69E-07 |
| 19    | 100    | 44.1456  | 15829 | 54  | 0.000167 | 0 | 4.52E-06 |
| 69.2  | 9.925  | 44.7273  | 16064 | 72  | 2.52E-06 | 0 | 7.38E-06 |
| 47.2  | 100    | 44.9559  | 16154 | 55  | 0.000135 | 0 | 3.35E-05 |
| 10    | 100    | 48.9927  | 17743 | 57  | 8.54E-05 | 0 | 2.64E-05 |
| 20.5  | 100    | 48.4914  | 17543 | 67  | 9.52E-06 | 0 | 3.57E-07 |
| 19.1  | 100    | 47.9828  | 17333 | 65  | 1.41E-05 | 0 | 1.11E-06 |
| 24.9  | 100    | 47.4749  | 17123 | 63  | 2.08E-05 | 0 | 6.01E-07 |
| 14    | 100    | 46.967   | 16924 | 65  | 1.3E-05  | 0 | 2.4E-06  |
| 7.3   | 100    | 44.9484  | 16151 | 44  | 0.001754 | 0 | 0.000403 |
| 17.2  | 100    | 46.4604  | 16717 | 63  | 1.94E-05 | 0 | 7.58E-07 |
| 133.1 | 70.194 | 60.697   | 20415 | 25  | 0.086035 | 0 | 0.000814 |
| 12.9  | 100    | 45.9558  | 16527 | 65  | 1.4E-05  | 0 | 4.38E-07 |
| 11.9  | 100    | 45.4526  | 16336 | 73  | 1.96E-06 | 0 | 2.69E-07 |
| 7.5   | 100    | 49.4957  | 17941 | 53  | 0.000234 | 0 | 6.96E-05 |
| 64    | 26.397 | 53.7309  | 19580 | 59  | 4.57E-05 | 0 | 0.000762 |
| 53.5  | 6.507  | 53.6837  | 19560 | 55  | 0.000108 | 0 | 7.25E-05 |
| 15.3  | 100    | 53.2234  | 19371 | 45  | 0.000991 | 0 | 0.00048  |
| 29.2  | 69.863 | 69.2831  | 23896 | 83  | 2.43E-07 | 0 | 2.31E-10 |
| 18.8  | 100    | 69.453   | 23964 | 38  | 0.001885 | 0 | 0.00038  |
| 30.3  | 100    | 68.8945  | 23740 | 26  | 0.027292 | 0 | 0.000813 |
| 19.7  | 100    | 68.7822  | 23691 | 78  | 8.72E-07 | 0 | 1.79E-08 |
| 85.7  | 100    | 19.3325  | 6363  | 16  | 0.451828 | 0 | 0.000185 |
| 92.9  | 56.288 | 19.8361  | 6566  | 24  | 0.08889  | 0 | 9.33E-05 |

|       |        |          |       |     |          |   |          |
|-------|--------|----------|-------|-----|----------|---|----------|
| 20.3  | 100    | 58.0314  | 19235 | 58  | 4.54E-05 | 0 | 6E-08    |
| 4.8   | 100    | 130.7859 | 48226 | 41  | 0.001804 | 0 | 0.000416 |
| 5.1   | 100    | 131.287  | 48413 | 83  | 1.14E-07 | 0 | 2.51E-09 |
| 18.1  | 100    | 53.2095  | 17388 | 45  | 0.001087 | 0 | 0.000301 |
| 34.6  | 100    | 64.5483  | 21712 | 42  | 0.001773 | 0 | 0.000154 |
| 88.1  | 100    | 64.4168  | 21661 | 23  | 0.138253 | 0 | 0.001393 |
| 11.4  | 100    | 45.5148  | 14507 | 74  | 1.68E-06 | 0 | 1.04E-07 |
| 5.3   | 100    | 46.551   | 14909 | 50  | 0.000438 | 0 | 7.88E-05 |
| 9     | 100    | 46.0223  | 14704 | 62  | 2.51E-05 | 0 | 1.08E-05 |
| 6.8   | 100    | 109.3781 | 39556 | 42  | 0.002176 | 0 | 0.001359 |
| 11.1  | 100    | 75.2435  | 25899 | 49  | 0.000697 | 0 | 6.2E-06  |
| 29.4  | 100    | 74.0535  | 25431 | 33  | 0.023124 | 0 | 0.00041  |
| 30.3  | 100    | 118.2095 | 43228 | 67  | 7.1E-06  | 0 | 1.4E-07  |
| 54.9  | 22.745 | 120.3539 | 44070 | 70  | 3.48E-06 | 0 | 2.25E-06 |
| 15.7  | 100    | 119.9646 | 43910 | 76  | 1.03E-06 | 0 | 3E-07    |
| 59.7  | 24.029 | 82.5673  | 28752 | 66  | 5.72E-06 | 0 | 6.42E-05 |
| 8.3   | 100    | 80.2535  | 29780 | 94  | 1.82E-08 | 0 | 9.88E-11 |
| 58.5  | 100    | 73.3187  | 26973 | 44  | 0.001462 | 0 | 0.001191 |
| 71.5  | 100    | 73.3106  | 26969 | 48  | 0.0007   | 0 | 8.22E-07 |
| 3.6   | 100    | 75.8358  | 27967 | 51  | 0.000328 | 0 | 9.13E-05 |
| 12.1  | 100    | 75.3235  | 27752 | 31  | 0.037351 | 0 | 0.000753 |
| 6     | 100    | 74.8159  | 27556 | 52  | 0.000285 | 0 | 0.00012  |
| 6.7   | 100    | 74.3114  | 27366 | 39  | 0.005507 | 0 | 0.000254 |
| 36    | 79.755 | 73.8097  | 27172 | 54  | 0.000177 | 0 | 1.77E-06 |
| 15.3  | 100    | 82.3371  | 30602 | 48  | 4.3E-05  | 0 | 3.84E-07 |
| 147.6 | 7.029  | 141.0743 | 52586 | 100 | 2.3E-09  | 0 | 5.46E-09 |
| 15.4  | 5.361  | 141.075  | 52587 | 70  | 2.56E-06 | 0 | 2.61E-05 |
| 2.3   | 100    | 80.529   | 29891 | 83  | 2.03E-07 | 0 | 1.26E-07 |
| 9.2   | 100    | 80.5187  | 29887 | 101 | 3.7E-09  | 0 | 2E-11    |
| 3.6   | 100    | 81.9108  | 30437 | 38  | 0.000435 | 0 | 0.000247 |
| 14.6  | 100    | 52.299   | 18513 | 54  | 0.000129 | 0 | 8.76E-05 |
| 7.1   | 100    | 19.3827  | 5694  | 37  | 0.007446 | 0 | 0.000972 |
| 22.4  | 100    | 26.7751  | 8058  | 31  | 0.037105 | 0 | 0.000149 |
| 85.4  | 16.127 | 51.2697  | 18100 | 44  | 0.001779 | 0 | 0.000374 |
| 26.6  | 19.96  | 51.256   | 18093 | 72  | 2.38E-06 | 0 | 6.25E-06 |
| 9     | 100    | 69.7294  | 25494 | 39  | 0.005929 | 0 | 7.67E-05 |
| 13.4  | 34.379 | 69.2223  | 25297 | 41  | 0.003353 | 0 | 1.92E-05 |
| 22    | 100    | 15.4165  | 4314  | 30  | 0.011077 | 0 | 1.33E-05 |
| 8.7   | 100    | 15.4448  | 4326  | 49  | 0.000144 | 0 | 0.000139 |
| 16    | 30.731 | 68.7185  | 25103 | 21  | 0.376694 | 0 | 0.000476 |
| 5.6   | 100    | 67.3865  | 24575 | 28  | 0.067141 | 0 | 0.001469 |
| 35.9  | 100    | 140.0434 | 52046 | 36  | 0.009228 | 0 | 4.76E-07 |
| 26.3  | 100    | 140.0565 | 52052 | 54  | 0.000122 | 0 | 1.42E-09 |
| 6.9   | 100    | 140.0447 | 54986 | 33  | 0.024457 | 0 | 0.000372 |
| 19.8  | 73.788 | 132.206  | 51585 | 80  | 3.47E-07 | 0 | 1.44E-10 |
| 7.4   | 91.384 | 132.1103 | 51542 | 83  | 1.96E-07 | 0 | 2.14E-09 |
| 15.3  | 67.021 | 131.6088 | 51317 | 109 | 4.98E-10 | 0 | 1.55E-11 |
| 19.6  | 69.602 | 131.1056 | 51115 | 118 | 6.4E-11  | 0 | 2.71E-12 |
| 1.8   | 100    | 130.5995 | 50912 | 37  | 0.009179 | 0 | 0.000672 |
| 2.9   | 100    | 131.8323 | 51412 | 52  | 0.000296 | 0 | 0.000023 |
| 24.3  | 31.084 | 98.7751  | 37452 | 45  | 0.001731 | 0 | 4.54E-07 |
| 30.9  | 91.116 | 99.2798  | 37690 | 45  | 0.001465 | 0 | 4.16E-08 |

|       |        |          |       |     |          |   |          |
|-------|--------|----------|-------|-----|----------|---|----------|
| 28.7  | 36.222 | 140.6069 | 52332 | 46  | 0.000981 | 0 | 2.03E-07 |
| 53.4  | 68.358 | 140.6086 | 52333 | 97  | 8.2E-09  | 0 | 1.35E-12 |
| 7.4   | 100    | 103.6495 | 39585 | 31  | 0.038359 | 0 | 0.001228 |
| 145.4 | 100    | 140.3464 | 52191 | 72  | 1.36E-06 | 0 | 1.43E-12 |
| 50.8  | 6.249  | 140.3691 | 52202 | 54  | 9.89E-05 | 0 | 1.71E-10 |
| 15.9  | 100    | 110.8989 | 41324 | 34  | 0.008172 | 0 | 0.000158 |
| 27.9  | 24.059 | 105.2932 | 40788 | 52  | 0.000273 | 0 | 0.000228 |
| 14.8  | 100    | 109.127  | 40590 | 50  | 0.000423 | 0 | 5.31E-06 |
| 22.4  | 89.759 | 90.372   | 34459 | 57  | 7.32E-05 | 0 | 0.000402 |
| 18.1  | 100    | 138.9148 | 53389 | 55  | 0.000113 | 0 | 5.72E-06 |
| 22.1  | 68.178 | 90.8757  | 34674 | 58  | 5.99E-05 | 0 | 0.000694 |
| 16.9  | 100    | 63.2653  | 23339 | 61  | 5.14E-06 | 0 | 2.61E-09 |
| 20.1  | 100    | 91.3819  | 34890 | 60  | 3.52E-05 | 0 | 0.000542 |
| 12.1  | 100    | 63.7674  | 23541 | 59  | 9.53E-06 | 0 | 1.78E-07 |
| 98.4  | 17.705 | 140.6548 | 54223 | 76  | 1.01E-06 | 0 | 4.73E-06 |
| 30.8  | 100    | 26.0082  | 8453  | 48  | 0.000457 | 0 | 4.58E-07 |
| 65.6  | 100    | 26.0959  | 8486  | 55  | 8.77E-05 | 0 | 1.74E-08 |
| 18.8  | 100    | 34.1424  | 11673 | 39  | 0.001404 | 0 | 0.000948 |
| 100.4 | 24.426 | 140.6245 | 54204 | 76  | 7.21E-07 | 0 | 1.12E-08 |
| 31.2  | 19.063 | 34.5798  | 11847 | 50  | 9.89E-05 | 0 | 1.77E-06 |
| 11    | 100    | 34.6442  | 11871 | 48  | 0.000155 | 0 | 0.000421 |
| 357.1 | 50.576 | 140.6259 | 54205 | 83  | 1.37E-07 | 0 | 8.46E-09 |
| 106.6 | 100    | 17.0844  | 5636  | 16  | 1.144979 | 0 | 8.11E-05 |
| 4.1   | 100    | 140.7393 | 52647 | 99  | 4.58E-09 | 0 | 1.31E-11 |
| 43.2  | 22.653 | 60.5249  | 21838 | 43  | 0.000254 | 0 | 1.73E-05 |
| 6.7   | 100    | 140.7415 | 52648 | 72  | 2.34E-06 | 0 | 2.04E-07 |
| 32.2  | 100    | 60.0222  | 21626 | 28  | 0.008495 | 0 | 0.000531 |
| 36.7  | 6.461  | 64.7163  | 23560 | 58  | 5.67E-05 | 0 | 2.73E-07 |
| 40.7  | 100    | 64.3058  | 23390 | 46  | 0.001114 | 0 | 2.29E-07 |
| 36.8  | 100    | 124.5126 | 47211 | 58  | 5.12E-05 | 0 | 1.6E-05  |
| 59.6  | 100    | 51.2351  | 18063 | 34  | 0.013929 | 0 | 0.00054  |
| 5.1   | 100    | 82.3204  | 30943 | 59  | 1.76E-05 | 0 | 0.000278 |
| 30.3  | 100    | 48.8539  | 19259 | 36  | 0.006438 | 0 | 0.000406 |
| 22.3  | 54.565 | 50.2015  | 19843 | 59  | 4.58E-05 | 0 | 0.000384 |
| 18.2  | 26.86  | 50.7154  | 20069 | 60  | 3.51E-05 | 0 | 0.000614 |
| 15.2  | 100    | 48.9476  | 19297 | 70  | 4.47E-06 | 0 | 3.75E-06 |
| 115.7 | 65.515 | 50.9411  | 18366 | 45  | 0.001366 | 0 | 0.000994 |
| 127.6 | 10.578 | 50.4398  | 18165 | 54  | 0.000169 | 0 | 0.001187 |
| 106.1 | 18.675 | 50.1181  | 18052 | 51  | 0.000319 | 0 | 0.000985 |
| 116.8 | 16.562 | 49.933   | 17976 | 54  | 0.000172 | 0 | 0.000789 |
| 12.8  | 100    | 142.6867 | 49649 | 88  | 6.12E-08 | 0 | 2.46E-10 |
| 31    | 74.751 | 82.7526  | 29614 | 45  | 0.000303 | 0 | 3.7E-05  |
| 13.6  | 44.195 | 142.6845 | 49648 | 101 | 3.3E-09  | 0 | 1.44E-10 |
| 31.7  | 72.683 | 82.7185  | 29599 | 29  | 0.010851 | 0 | 0.000388 |
| 13.2  | 99.274 | 63.181   | 25422 | 46  | 0.001157 | 0 | 0.0002   |
| 35.6  | 100    | 141.5416 | 54755 | 86  | 7.1E-08  | 0 | 2.08E-10 |
| 18    | 30.741 | 141.5275 | 54747 | 107 | 5.74E-10 | 0 | 2.59E-11 |
| 22.5  | 88.918 | 53.2458  | 21180 | 62  | 2.25E-05 | 0 | 0.000256 |
| 13.6  | 100    | 141.2385 | 54582 | 48  | 0.000238 | 0 | 9.96E-10 |
| 21.1  | 30.637 | 51.7291  | 20511 | 63  | 1.9E-05  | 0 | 0.000489 |
| 26.8  | 21.842 | 51.225   | 20291 | 56  | 0.000102 | 0 | 0.001046 |
| 31.3  | 73.493 | 52.7427  | 20957 | 56  | 9.32E-05 | 0 | 0.001253 |



|       |        |          |       |     |          |          |          |
|-------|--------|----------|-------|-----|----------|----------|----------|
| 21.7  | 44.402 | 52.2326  | 20726 | 65  | 1.2E-05  | 0        | 0.0003   |
| 46    | 100    | 141.2897 | 54612 | 55  | 0.000144 | 0        | 2.45E-07 |
| 22.2  | 100    | 141.2919 | 54613 | 21  | 0.378657 | 0        | 6.34E-05 |
| 38.5  | 44.682 | 73.531   | 29900 | 58  | 2.31E-05 | 0        | 4.23E-05 |
| 11.1  | 100    | 73.6824  | 29967 | 76  | 1.08E-06 | 0        | 1.37E-09 |
| 1.9   | 100    | 73.1727  | 29743 | 59  | 5.27E-05 | 0        | 3.96E-06 |
| 254.9 | 92.619 | 140.7921 | 54303 | 43  | 0.001922 | 0        | 7.5E-08  |
| 2.7   | 100    | 142.1132 | 55077 | 67  | 2.27E-06 | 0        | 4.41E-09 |
| 1.1   | 100    | 74.6913  | 30384 | 54  | 0.000173 | 0        | 2.31E-06 |
| 5.6   | 100    | 140.7002 | 50323 | 60  | 4.06E-05 | 0        | 2.24E-06 |
| 43.4  | 100    | 74.189   | 30176 | 70  | 5.12E-06 | 0        | 1.56E-10 |
| 50.7  | 97.46  | 24.2541  | 8932  | 30  | 0.004788 | 0        | 0.000189 |
| 18.1  | 100    | 25.5035  | 8264  | 35  | 0.008874 | 0        | 0.000245 |
| 53.4  | 59.418 | 25.5938  | 8300  | 50  | 0.000312 | 0        | 1.52E-06 |
| 67.7  | 100    | 18.8207  | 6531  | 11  | 1.951133 | 0        | 0.001053 |
| 60.6  | 33.758 | 25.0894  | 8106  | 48  | 0.000445 | 0        | 7.8E-07  |
| 536   | 86.23  | 140.8999 | 54371 | 133 | 1.17E-12 | 0        | 2.28E-10 |
| 8     | 100    | 73.1218  | 26846 | 35  | 0.000571 | 0        | 7.09E-05 |
| 12.6  | 100    | 72.6165  | 26636 | 56  | 4.05E-06 | 0        | 1.16E-05 |
| 8.3   | 100    | 72.1104  | 26448 | 57  | 3.5E-06  | 0        | 2.15E-06 |
| 65.4  | 11.615 | 140.917  | 54382 | 65  | 7.94E-06 | 0        | 4.42E-06 |
| 52.3  | 42.977 | 140.79   | 54302 | 49  | 0.000424 | 0        | 9.67E-09 |
| 30.8  | 24.255 | 140.9428 | 54398 | 70  | 2.35E-06 | 0        | 2.56E-07 |
| 4.6   | 100    | 76.3438  | 28183 | 32  | 0.030504 | 0.000141 | 0.001752 |
| 11.4  | 100    | 91.888   | 35081 | 55  | 0.000119 | 0.000141 | 0.001771 |
| 9.3   | 100    | 69.13    | 25259 | 23  | 0.210028 | 0.000141 | 0.00173  |
| 24.6  | 100    | 51.8056  | 18828 | 28  | 0.072594 | 0.000141 | 0.001677 |
| 3.5   | 100    | 14.6201  | 4039  | 50  | 4.62E-05 | 0.000141 | 0.001743 |
| 25.8  | 100    | 51.7768  | 18303 | 38  | 0.007362 | 0.000273 | 0.001841 |
| 12.5  | 100    | 53.6307  | 17542 | 34  | 0.013775 | 0.000273 | 0.002053 |
| 40.5  | 100    | 45.0903  | 16203 | 29  | 0.048543 | 0.000273 | 0.002043 |
| 12    | 77.312 | 48.9454  | 19296 | 42  | 0.00291  | 0.000273 | 0.00192  |
| 30.7  | 100    | 140.3615 | 52198 | 4   | 9.990079 | 0.000273 | 0.002072 |
| 14.2  | 100    | 50.0068  | 19756 | 41  | 0.003275 | 0.000273 | 0.001828 |
| 0.8   | 100    | 139.8983 | 57185 | 29  | 0.053745 | 0.000273 | 0.001823 |
| 20.4  | 100    | 20.9823  | 6080  | 33  | 0.008161 | 0.000525 | 0.002484 |
| 131.8 | 86.205 | 47.2845  | 16950 | 47  | 0.000488 | 0.000525 | 0.002449 |
| 1.7   | 100    | 74.1908  | 27492 | 35  | 0.004551 | 0.000525 | 0.00264  |
| 53.9  | 100    | 19.6153  | 6122  | 36  | 0.003951 | 0.000525 | 0.00218  |
| 43.6  | 100    | 19.6216  | 6125  | 31  | 0.015263 | 0.000525 | 0.002193 |
| 6.8   | 100    | 51.5664  | 18733 | 35  | 0.013927 | 0.000525 | 0.002585 |
| 27.3  | 100    | 89.3595  | 34019 | 43  | 0.001779 | 0.000525 | 0.002548 |
| 16.8  | 100    | 23.9752  | 8812  | 15  | 1.288003 | 0.000525 | 0.002617 |
| 12.6  | 100    | 73.5481  | 25210 | 35  | 0.014876 | 0.00065  | 0.002758 |
| 113   | 6.644  | 19.8171  | 6557  | 29  | 0.019485 | 0.00065  | 0.002683 |
| 30.1  | 100    | 58.0486  | 19242 | 13  | 1.606633 | 0.00065  | 0.002744 |
| 1.2   | 100    | 140.039  | 52044 | 32  | 0.025181 | 0.000758 | 0.002807 |
| 51.3  | 100    | 25.3247  | 9405  | 16  | 1.046394 | 0.000758 | 0.00284  |
| 0.9   | 100    | 105.1791 | 40222 | 14  | 0.667869 | 0.000758 | 0.002954 |
| 13    | 100    | 117.701  | 43018 | 35  | 0.012118 | 0.000758 | 0.002858 |
| 122.3 | 90.693 | 50.4936  | 18187 | 39  | 0.005252 | 0.000758 | 0.003201 |
| 19.1  | 100    | 34.0742  | 11644 | 14  | 0.441926 | 0.000758 | 0.00285  |

|       |        |          |       |    |          |          |          |
|-------|--------|----------|-------|----|----------|----------|----------|
| 88.2  | 100    | 34.2989  | 11739 | 13 | 0.544819 | 0.000758 | 0.002894 |
| 46    | 100    | 50.7632  | 17905 | 35 | 0.012909 | 0.000758 | 0.003079 |
| 3.4   | 100    | 17.9655  | 5226  | 25 | 0.014289 | 0.000758 | 0.002977 |
| 3.4   | 100    | 17.9655  | 5226  | 25 | 0.014289 | 0.000758 | 0.002977 |
| 103.8 | 27.461 | 82.5734  | 28755 | 38 | 0.003734 | 0.000868 | 0.003534 |
| 17.7  | 100    | 50.9966  | 18389 | 45 | 0.001447 | 0.000868 | 0.003508 |
| 65.9  | 100    | 17.8373  | 5699  | 39 | 0.00335  | 0.000951 | 0.003947 |
| 106.1 | 100    | 20.8713  | 6987  | 25 | 0.047723 | 0.000951 | 0.003765 |
| 0.8   | 100    | 131.3311 | 51203 | 29 | 0.053789 | 0.000951 | 0.003712 |
| 33.2  | 100    | 62.8287  | 22776 | 23 | 0.026752 | 0.000951 | 0.0039   |
| 5.4   | 100    | 71.6061  | 26262 | 31 | 0.001376 | 0.000951 | 0.004098 |
| 21    | 100    | 28.366   | 10641 | 27 | 0.011455 | 0.000951 | 0.004209 |
| 1.2   | 100    | 75.1924  | 30577 | 21 | 0.380311 | 0.000951 | 0.004156 |
| 7.7   | 100    | 50.5124  | 19975 | 40 | 0.003581 | 0.000951 | 0.004123 |
| 5.7   | 100    | 44.0339  | 15241 | 29 | 0.051091 | 0.000951 | 0.003932 |
| 11    | 100    | 65.2193  | 23762 | 19 | 0.480666 | 0.000951 | 0.003689 |
| 10.3  | 100    | 92.3944  | 35287 | 53 | 0.000189 | 0.000951 | 0.003641 |
| 107.8 | 3.22   | 44.4921  | 15966 | 29 | 0.051258 | 0.001022 | 0.004747 |
| 40.1  | 100    | 30.3872  | 9243  | 19 | 0.097317 | 0.001022 | 0.005109 |
| 5.9   | 100    | 44.9463  | 16150 | 42 | 0.00147  | 0.001022 | 0.005218 |
| 1.4   | 100    | 46.6373  | 16788 | 37 | 0.008579 | 0.001022 | 0.005544 |
| 115   | 100    | 36.1031  | 13855 | 45 | 0.00057  | 0.001022 | 0.005709 |
| 70.8  | 100    | 28.9716  | 10091 | 12 | 0.317171 | 0.001022 | 0.004765 |
| 5.7   | 100    | 73.6388  | 27019 | 34 | 0.000438 | 0.001022 | 0.005004 |
| 25.3  | 100    | 82.2423  | 29402 | 22 | 0.050176 | 0.001022 | 0.005519 |
| 2.4   | 100    | 62.3064  | 25069 | 38 | 0.001586 | 0.001022 | 0.005489 |
| 2.7   | 100    | 75.7002  | 30797 | 24 | 0.170867 | 0.001022 | 0.005456 |
| 7.6   | 100    | 49.9986  | 18134 | 29 | 0.049538 | 0.001114 | 0.0063   |
| 28.9  | 100    | 43.5981  | 15074 | 30 | 0.043765 | 0.001114 | 0.006038 |
| 41.2  | 100    | 18.2848  | 5915  | 43 | 0.000708 | 0.001114 | 0.005922 |
| 60.7  | 100    | 49.9901  | 17997 | 35 | 0.012719 | 0.00121  | 0.006739 |
| 151   | 100    | 20.3242  | 6770  | 18 | 0.226304 | 0.00121  | 0.006524 |
| 1.9   | 100    | 119.8474 | 43868 | 26 | 0.09685  | 0.001308 | 0.006929 |
| 3.2   | 100    | 81.8308  | 30404 | 24 | 0.011637 | 0.00141  | 0.007238 |
| 9.4   | 100    | 49.693   | 19621 | 39 | 0.005167 | 0.001498 | 0.008041 |
| 36.1  | 100    | 19.1952  | 5962  | 15 | 0.520809 | 0.001498 | 0.007888 |
| 3.4   | 100    | 98.8211  | 37473 | 19 | 0.570059 | 0.001576 | 0.008343 |
| 8.5   | 100    | 46.2607  | 16116 | 21 | 0.367644 | 0.001576 | 0.008795 |
| 4.2   | 100    | 52.2137  | 20717 | 35 | 0.01253  | 0.001576 | 0.008754 |
| 0.8   | 100    | 104.1507 | 39790 | 22 | 0.31073  | 0.001576 | 0.008837 |
| 2.3   | 100    | 63.5775  | 23352 | 27 | 0.025692 | 0.001576 | 0.008461 |
| 26.1  | 100    | 43.9908  | 15768 | 28 | 0.05474  | 0.001758 | 0.009068 |
| 49.9  | 100    | 51.0304  | 18522 | 19 | 0.537635 | 0.001758 | 0.00932  |
| 0.3   | 100    | 140.0482 | 57253 | 26 | 0.029591 | 0.001854 | 0.00971  |
| 10.8  | 100    | 68.6272  | 25065 | 21 | 0.425007 | 0.001945 | 0.01004  |
| 16    | 100    | 74.5756  | 27641 | 33 | 0.006282 | 0.002012 | 0.01119  |
| 5.9   | 100    | 43.7662  | 13864 | 32 | 0.026945 | 0.002012 | 0.01058  |
| 4.9   | 100    | 88.4592  | 33619 | 30 | 0.028042 | 0.002012 | 0.01113  |
| 18.1  | 100    | 82.0668  | 28552 | 40 | 0.00273  | 0.002012 | 0.01066  |
| 10.5  | 100    | 51.2004  | 20279 | 40 | 0.003782 | 0.002012 | 0.0105   |
| 4.9   | 100    | 109.6307 | 40787 | 20 | 0.440989 | 0.002079 | 0.01178  |
| 18.7  | 100    | 48.3463  | 19030 | 26 | 0.059351 | 0.002079 | 0.01217  |

|       |        |          |       |    |          |          |          |
|-------|--------|----------|-------|----|----------|----------|----------|
| 2.7   | 100    | 77.3     | 28659 | 19 | 0.633673 | 0.002079 | 0.01155  |
| 57.5  | 100    | 27.8535  | 10421 | 10 | 0.491353 | 0.002257 | 0.01254  |
| 1     | 100    | 70.4607  | 25949 | 46 | 0.000859 | 0.002257 | 0.01243  |
| 2.8   | 100    | 131.8437 | 51417 | 21 | 0.32756  | 0.002257 | 0.01267  |
| 25.1  | 100    | 59.2422  | 19828 | 40 | 0.002378 | 0.002315 | 0.01408  |
| 4.5   | 100    | 52.981   | 17391 | 17 | 0.654801 | 0.002315 | 0.01353  |
| 7.6   | 100    | 49.4544  | 19521 | 25 | 0.152486 | 0.002376 | 0.01473  |
| 126.1 | 50.91  | 46.7798  | 16753 | 44 | 0.000689 | 0.002376 | 0.01472  |
| 1     | 100    | 70.7419  | 24112 | 19 | 0.552064 | 0.002543 | 0.01588  |
| 7.1   | 100    | 24.9993  | 8069  | 18 | 0.407979 | 0.002777 | 0.01742  |
| 0     | 100    | 139.3891 | 56983 | 15 | 1.664075 | 0.002843 | 0.019    |
| 9.7   | 100    | 45.7615  | 17932 | 38 | 0.006722 | 0.002843 | 0.01849  |
| 7.6   | 100    | 72.7142  | 26670 | 11 | 0.120537 | 0.003178 | 0.02061  |
| 23.3  | 100    | 82.0647  | 28551 | 26 | 0.059215 | 0.003254 | 0.02131  |
| 61.9  | 100    | 41.0625  | 14533 | 53 | 0.000242 | 0.00337  | 0.0219   |
| 32.8  | 100    | 42.1649  | 14408 | 35 | 0.008184 | 0.00337  | 0.02402  |
| 13    | 100    | 71.897   | 24980 | 23 | 0.20745  | 0.00337  | 0.0221   |
| 2.2   | 100    | 49.9054  | 16227 | 24 | 0.181121 | 0.00337  | 0.0225   |
| 2.9   | 100    | 72.0111  | 26412 | 15 | 0.063497 | 0.003674 | 0.0264   |
| 24.4  | 100    | 19.742   | 6057  | 18 | 0.244492 | 0.004124 | 0.02979  |
| 2.5   | 100    | 51.7082  | 20501 | 23 | 0.203247 | 0.004124 | 0.02984  |
| 7.6   | 100    | 74.7407  | 25704 | 10 | 5.621312 | 0.004124 | 0.02959  |
| 3.7   | 100    | 98.271   | 37223 | 12 | 3.30343  | 0.004192 | 0.0299   |
| 21.3  | 100    | 49.4866  | 17795 | 29 | 0.048822 | 0.004266 | 0.03106  |
| 0     | 100    | 28.0443  | 9410  | 36 | 0.001227 | 0.004643 | 0.03347  |
| 3.5   | 100    | 66.5702  | 22797 | 15 | 1.503107 | 0.005404 | 0.03763  |
| 263.3 | 42.167 | 19.5122  | 6441  | 7  | 4.969205 | 0.005618 | 0.03926  |
| 0.9   | 100    | 76.9948  | 27139 | 19 | 0.53725  | 0.00573  | 0.04157  |
| 4     | 100    | 50.501   | 18320 | 21 | 0.333801 | 0.00599  | 0.04445  |
| 11.6  | 100    | 74.6035  | 25651 | 15 | 1.546446 | 0.00599  | 0.04508  |
| 19.5  | 100    | 53.1148  | 17439 | 3  | 14.82892 | 0.006371 | 0.04647  |
| 7.2   | 100    | 71.6471  | 26743 | 36 | 0.00853  | 0.006371 | 0.04654  |
| 4.4   | 100    | 51.6233  | 18222 | 30 | 0.035213 | 0.006371 | 0.04633  |
| 5     | 100    | 97.5521  | 40026 | 11 | 0.737544 | 0.006428 | 0.04688  |
| 1.1   | 100    | 68.8382  | 23716 | 17 | 1.054791 | 0.007636 | 0.05478  |
| 12    | 100    | 61.0411  | 22052 | 17 | 0.100298 | 0.0081   | 0.05932  |
| 33.1  | 100    | 41.7739  | 14256 | 15 | 0.903186 | 0.008997 | 0.06946  |
| 17.8  | 100    | 105.793  | 39797 | 8  | 7.710778 | 0.009498 | 0.07196  |
| 14.7  | 100    | 74.0442  | 30119 | 26 | 0.033245 | 0.009514 | 0.07346  |
| 13.6  | 100    | 48.4384  | 19072 | 16 | 1.250258 | 0.009514 | 0.0754   |
| 3.7   | 100    | 73.5986  | 29931 | 13 | 2.274658 | 0.009764 | 0.07866  |
| 4     | 100    | 66.5147  | 24487 | 12 | 0.732263 | 0.009858 | 0.08002  |
| 3.3   | 100    | 105.6533 | 40940 | 23 | 0.224037 | 0.009985 | 0.08289  |
| 40.7  | 35.065 | 50.8062  | 16571 | 40 | 0.005383 | 0        | 1.6E-07  |
| 39.7  | 100    | 50.6821  | 16522 | 56 | 8.71E-05 | 0        | 0.000241 |
| 8     | 100    | 92.4278  | 34519 | 53 | 0.000182 | 0        | 2.74E-05 |
| 4.6   | 100    | 91.9234  | 34336 | 57 | 7.88E-05 | 0        | 4.06E-06 |
| 10.6  | 100    | 88.2119  | 32900 | 43 | 0.001102 | 0        | 6.55E-05 |
| 2.7   | 100    | 85.5773  | 31831 | 52 | 0.000269 | 0        | 3.12E-05 |
| 29.7  | 100    | 52.0276  | 17039 | 27 | 0.028565 | 0        | 4.5E-05  |
| 9.1   | 100    | 85.7149  | 31882 | 35 | 0.012075 | 0        | 0.000427 |
| 12    | 100    | 87.7038  | 32687 | 34 | 0.009459 | 0        | 0.000627 |

|       |        |          |       |     |          |   |          |
|-------|--------|----------|-------|-----|----------|---|----------|
| 22.1  | 54.381 | 51.4163  | 16801 | 47  | 0.000492 | 0 | 5.32E-07 |
| 5.4   | 100    | 51.4384  | 16811 | 58  | 3.81E-05 | 0 | 2.37E-06 |
| 23.9  | 100    | 51.526   | 16845 | 30  | 0.014251 | 0 | 5.03E-05 |
| 24.3  | 35.481 | 86.0812  | 32023 | 60  | 4.32E-05 | 0 | 1.07E-07 |
| 0.5   | 100    | 101.0287 | 37989 | 58  | 2.76E-05 | 0 | 0.000556 |
| 0.8   | 100    | 99.1975  | 37207 | 74  | 1.85E-06 | 0 | 1.35E-06 |
| 3.1   | 100    | 100.2099 | 37639 | 56  | 9.19E-05 | 0 | 5.33E-05 |
| 0     | 100    | 101.5299 | 38191 | 64  | 5.89E-06 | 0 | 3.79E-05 |
| 10.6  | 100    | 104.2467 | 39222 | 56  | 0.000106 | 0 | 2.01E-08 |
| 18.7  | 100    | 103.0223 | 38778 | 38  | 0.006684 | 0 | 0.000745 |
| 11.5  | 100    | 102.1573 | 38446 | 114 | 1.67E-10 | 0 | 1.69E-11 |
| 2.9   | 100    | 102.1477 | 38442 | 46  | 0.001157 | 0 | 0.000737 |
| 30.2  | 65.431 | 101.9755 | 38372 | 95  | 1.26E-08 | 0 | 2.25E-09 |
| 5.2   | 100    | 94.169   | 35220 | 63  | 2.15E-05 | 0 | 2.05E-05 |
| 3.3   | 100    | 93.668   | 35025 | 56  | 0.000112 | 0 | 5.55E-05 |
| 13    | 100    | 95.0863  | 35589 | 54  | 0.000158 | 0 | 3.59E-08 |
| 8     | 100    | 97.7792  | 36657 | 58  | 5.73E-05 | 0 | 6.58E-06 |
| 10.4  | 100    | 97.3909  | 36500 | 48  | 0.000613 | 0 | 7.97E-05 |
| 21.8  | 44.121 | 97.329   | 36474 | 90  | 3.89E-08 | 0 | 2.95E-08 |
| 36.2  | 2.437  | 97.2734  | 36450 | 73  | 1.61E-06 | 0 | 1.17E-06 |
| 12.4  | 100    | 96.9686  | 36322 | 38  | 0.006464 | 0 | 7.16E-07 |
| 12.4  | 100    | 96.9686  | 36322 | 38  | 0.006464 | 0 | 7.16E-07 |
| 0.6   | 100    | 96.8743  | 36282 | 29  | 0.054949 | 0 | 0.000551 |
| 0.6   | 100    | 96.8743  | 36282 | 29  | 0.054949 | 0 | 0.000551 |
| 2.6   | 100    | 96.7712  | 36240 | 52  | 0.000234 | 0 | 3.85E-05 |
| 2.2   | 100    | 96.5979  | 36175 | 62  | 2.71E-05 | 0 | 3.93E-09 |
| 25.3  | 93.729 | 96.4971  | 36136 | 67  | 7.74E-06 | 0 | 3.62E-11 |
| 1.4   | 100    | 96.4657  | 36122 | 41  | 0.003154 | 0 | 1.37E-06 |
| 1.4   | 100    | 96.4657  | 36122 | 41  | 0.003154 | 0 | 1.37E-06 |
| 1.5   | 100    | 96.1863  | 36016 | 26  | 0.115588 | 0 | 0.000444 |
| 5.7   | 100    | 82.895   | 30802 | 58  | 6.61E-05 | 0 | 5.21E-08 |
| 0     | 13.842 | 68.478   | 25263 | 81  | 2.61E-07 | 0 | 4.54E-05 |
| 4.5   | 100    | 68.9834  | 25480 | 59  | 4.87E-05 | 0 | 0.000667 |
| 21.3  | 100    | 57.664   | 19229 | 41  | 0.001022 | 0 | 3.14E-06 |
| 72.2  | 38.288 | 57.4074  | 19122 | 60  | 1.35E-05 | 0 | 1.33E-09 |
| 154.7 | 100    | 57.6665  | 19230 | 51  | 0.000106 | 0 | 6.31E-09 |
| 67    | 61.613 | 57.9141  | 19331 | 56  | 4.19E-05 | 0 | 3.36E-09 |
| 99    | 4.71   | 57.3018  | 19079 | 34  | 0.005853 | 0 | 3.73E-06 |
| 18.1  | 100    | 56.7863  | 18867 | 50  | 0.000337 | 0 | 0.000872 |
| 10.9  | 100    | 53.5278  | 17585 | 30  | 0.042654 | 0 | 0.000369 |
| 13.2  | 22.764 | 54.0312  | 17779 | 50  | 0.000408 | 0 | 2.85E-06 |
| 8.7   | 100    | 72.7522  | 26962 | 37  | 0.002541 | 0 | 0.0007   |
| 27.2  | 100    | 55.664   | 18424 | 32  | 0.008723 | 0 | 0.00047  |
| 14.9  | 100    | 73.1792  | 27116 | 48  | 0.000172 | 0 | 0.000108 |
| 11.1  | 100    | 54.0943  | 17806 | 53  | 0.00025  | 0 | 3.66E-07 |
| 84.9  | 100    | 54.2235  | 17859 | 25  | 0.047355 | 0 | 0.00015  |
| 9.7   | 100    | 73.318   | 27167 | 33  | 0.005598 | 0 | 0.001359 |
| 10.4  | 100    | 73.258   | 27144 | 39  | 0.001442 | 0 | 0.000228 |
| 19.5  | 100    | 27.3195  | 9023  | 33  | 0.006403 | 0 | 0.000978 |
| 31.5  | 100    | 31.5971  | 10613 | 36  | 0.003998 | 0 | 0.000345 |
| 23.5  | 100    | 31.2792  | 10497 | 37  | 0.006898 | 0 | 0.000194 |
| 68.7  | 10.605 | 30.7753  | 10317 | 49  | 0.000414 | 0 | 4.12E-05 |

|       |        |          |       |     |          |   |          |
|-------|--------|----------|-------|-----|----------|---|----------|
| 46.6  | 12.511 | 30.0461  | 10039 | 54  | 0.000125 | 0 | 0.000036 |
| 77.1  | 23.724 | 30.0309  | 10034 | 23  | 0.182999 | 0 | 0.001152 |
| 55.3  | 5.58   | 30.2725  | 10122 | 51  | 0.000287 | 0 | 6.56E-05 |
| 20.5  | 100    | 17.9622  | 5453  | 53  | 0.00024  | 0 | 8.9E-06  |
| 33.5  | 100    | 17.9293  | 5437  | 34  | 0.013132 | 0 | 0.000265 |
| 10.1  | 100    | 16.8878  | 4967  | 52  | 0.000137 | 0 | 0.000238 |
| 35.7  | 100    | 18.3396  | 5617  | 35  | 0.009543 | 0 | 0.001099 |
| 41.4  | 100    | 18.4349  | 5658  | 38  | 0.004562 | 0 | 0.000241 |
| 41.6  | 100    | 22.0011  | 7020  | 30  | 0.035865 | 0 | 0.001239 |
| 20.9  | 100    | 19.5596  | 6099  | 38  | 0.004653 | 0 | 0.00043  |
| 36.6  | 7.5    | 31.9404  | 10744 | 58  | 3.06E-05 | 0 | 1.16E-06 |
| 27.8  | 100    | 39.2176  | 13487 | 27  | 0.019162 | 0 | 5.6E-05  |
| 24.8  | 100    | 39.5889  | 13619 | 41  | 0.003652 | 0 | 3.24E-05 |
| 8.6   | 100    | 45.8378  | 15949 | 33  | 0.026353 | 0 | 0.000424 |
| 57.3  | 100    | 29.8229  | 9033  | 40  | 0.000717 | 0 | 0.000671 |
| 35.1  | 100    | 30.3268  | 9196  | 53  | 3.69E-05 | 0 | 0.000238 |
| 67.7  | 100    | 16.6805  | 4878  | 13  | 1.953888 | 0 | 0.000725 |
| 46.2  | 66.443 | 35.6061  | 12108 | 52  | 0.000238 | 0 | 1.82E-06 |
| 32    | 43.619 | 35.44    | 12045 | 54  | 0.000138 | 0 | 2.65E-06 |
| 57    | 100    | 34.3719  | 11647 | 30  | 0.034582 | 0 | 9.7E-05  |
| 30.7  | 100    | 32.4435  | 10933 | 32  | 0.013451 | 0 | 0.000315 |
| 5.8   | 100    | 35.6875  | 12141 | 41  | 0.002801 | 0 | 0.000207 |
| 20.8  | 100    | 34.8627  | 10714 | 39  | 0.005107 | 0 | 3.9E-05  |
| 14.1  | 100    | 34.8448  | 10707 | 59  | 5.06E-05 | 0 | 5.26E-06 |
| 18    | 100    | 36.446   | 12430 | 45  | 0.00118  | 0 | 1.77E-05 |
| 47.8  | 100    | 36.1137  | 12298 | 47  | 0.000707 | 0 | 1.78E-05 |
| 32.9  | 77.71  | 35.9438  | 12235 | 51  | 0.00029  | 0 | 1.69E-06 |
| 0.4   | 100    | 121.3455 | 45334 | 23  | 0.19896  | 0 | 0.001185 |
| 0     | 100    | 126.547  | 47128 | 117 | 6.06E-11 | 0 | 3.26E-09 |
| 0     | 100    | 126.5164 | 47118 | 115 | 1.13E-10 | 0 | 7.26E-10 |
| 0     | 100    | 126.0452 | 46964 | 108 | 5.17E-10 | 0 | 4.17E-08 |
| 0     | 87.935 | 126.0141 | 46952 | 90  | 3.45E-08 | 0 | 1.25E-08 |
| 6.9   | 100    | 114.8482 | 43034 | 69  | 3.65E-06 | 0 | 1.01E-06 |
| 15.1  | 100    | 114.3445 | 42858 | 77  | 7.11E-07 | 0 | 5.69E-09 |
| 44.3  | 100    | 47.0687  | 15104 | 27  | 0.02967  | 0 | 0.000498 |
| 1.7   | 100    | 127.0232 | 47290 | 50  | 0.00036  | 0 | 0.00068  |
| 52.9  | 100    | 139.8804 | 51718 | 71  | 3.48E-06 | 0 | 1.31E-09 |
| 3.8   | 100    | 139.374  | 51547 | 38  | 0.006447 | 0 | 0.000598 |
| 110.1 | 100    | 57.9731  | 19357 | 50  | 0.000141 | 0 | 1.05E-09 |
| 5.6   | 100    | 118.3467 | 48593 | 55  | 0.00012  | 0 | 5.3E-08  |
| 2.3   | 100    | 117.7858 | 48363 | 23  | 0.176249 | 0 | 0.000497 |
| 2.8   | 100    | 118.7995 | 48800 | 37  | 0.007414 | 0 | 1.65E-06 |
| 7.1   | 100    | 120.3652 | 49450 | 57  | 8.08E-05 | 0 | 6.85E-09 |
| 11.3  | 83.598 | 120.2698 | 49414 | 89  | 4.5E-08  | 0 | 2.35E-13 |
| 8.1   | 94.152 | 119.8603 | 49240 | 61  | 3.22E-05 | 0 | 9.31E-11 |
| 12.2  | 100    | 118.8488 | 48822 | 79  | 4.31E-07 | 0 | 5.76E-13 |
| 10.6  | 99.764 | 119.7631 | 49199 | 77  | 7.94E-07 | 0 | 4.49E-12 |
| 7.7   | 100    | 119.3524 | 49037 | 61  | 2.71E-05 | 0 | 6.73E-13 |
| 1.4   | 100    | 119.2521 | 48994 | 22  | 0.255044 | 0 | 0.000649 |
| 5.5   | 100    | 114.6219 | 47064 | 74  | 1.34E-06 | 0 | 1.74E-07 |
| 24.3  | 29.524 | 114.119  | 46874 | 67  | 5.89E-06 | 0 | 7.12E-08 |
| 2.7   | 100    | 109.2165 | 44851 | 25  | 0.122555 | 0 | 0.000812 |

|      |        |          |       |     |          |   |          |
|------|--------|----------|-------|-----|----------|---|----------|
| 15.7 | 100    | 113.8554 | 46765 | 66  | 8.46E-06 | 0 | 5.98E-07 |
| 12.7 | 92.654 | 113.7172 | 46708 | 74  | 1.36E-06 | 0 | 3.82E-07 |
| 38.7 | 100    | 113.6142 | 46664 | 70  | 3.07E-06 | 0 | 1.5E-09  |
| 46.7 | 12.214 | 113.4675 | 46597 | 74  | 1.18E-06 | 0 | 1.33E-09 |
| 13.6 | 100    | 113.3549 | 46547 | 52  | 0.000205 | 0 | 5.84E-06 |
| 6.4  | 100    | 113.2145 | 46492 | 71  | 2.71E-06 | 0 | 1.33E-06 |
| 22.7 | 100    | 112.9605 | 46386 | 43  | 0.001606 | 0 | 4.41E-06 |
| 3.5  | 100    | 112.6186 | 46250 | 53  | 0.000156 | 0 | 2.73E-05 |
| 5.2  | 100    | 110.1167 | 45240 | 76  | 5.46E-07 | 0 | 2.17E-06 |
| 11   | 87.403 | 120.7745 | 49623 | 94  | 1.34E-08 | 0 | 2.72E-12 |
| 8.5  | 100    | 120.8693 | 49662 | 75  | 1.14E-06 | 0 | 2.41E-11 |
| 1.1  | 100    | 120.9785 | 49710 | 29  | 0.04262  | 0 | 6.59E-05 |
| 29.7 | 100    | 71.5131  | 24817 | 20  | 0.407275 | 0 | 0.001418 |
| 2    | 100    | 122.9992 | 50528 | 27  | 0.077498 | 0 | 0.000657 |
| 0.4  | 100    | 122.8836 | 50484 | 32  | 0.021888 | 0 | 0.001027 |
| 5.4  | 100    | 122.4919 | 50330 | 42  | 0.002561 | 0 | 2.05E-06 |
| 1.8  | 100    | 122.3809 | 50284 | 36  | 0.009634 | 0 | 8.87E-06 |
| 2.3  | 100    | 123.5098 | 50729 | 23  | 0.169674 | 0 | 0.000356 |
| 6.7  | 100    | 121.9851 | 50122 | 49  | 0.000482 | 0 | 1.54E-08 |
| 1.7  | 100    | 121.8796 | 50075 | 35  | 0.01277  | 0 | 4.21E-05 |
| 7.6  | 100    | 121.4814 | 49908 | 65  | 1.09E-05 | 0 | 7.47E-10 |
| 2.2  | 100    | 121.3709 | 49864 | 33  | 0.020155 | 0 | 0.00003  |
| 7.9  | 100    | 86.9673  | 35527 | 92  | 2.87E-08 | 0 | 4.6E-07  |
| 18.6 | 7.039  | 86.4611  | 35305 | 95  | 1.41E-08 | 0 | 2.3E-08  |
| 74.6 | 1.909  | 86.4325  | 35291 | 94  | 1.53E-08 | 0 | 2.38E-07 |
| 4.3  | 100    | 84.7982  | 34557 | 60  | 3.79E-05 | 0 | 2.98E-06 |
| 15.7 | 100    | 89.317   | 36529 | 59  | 5.41E-05 | 0 | 1.52E-05 |
| 12.2 | 100    | 89.1299  | 36450 | 46  | 0.001121 | 0 | 0.000171 |
| 2.2  | 100    | 89.0979  | 36439 | 79  | 6.03E-07 | 0 | 1.65E-07 |
| 41.6 | 100    | 88.8579  | 36342 | 97  | 9.56E-09 | 0 | 2.53E-08 |
| 12.3 | 71.833 | 99.2193  | 40744 | 76  | 1.03E-06 | 0 | 3.38E-06 |
| 64.2 | 6.171  | 99.211   | 40740 | 105 | 1.29E-09 | 0 | 2.97E-09 |
| 54.9 | 8.995  | 98.8124  | 40577 | 106 | 9.2E-10  | 0 | 7.2E-11  |
| 9.5  | 100    | 98.7008  | 40526 | 56  | 0.000104 | 0 | 2.77E-05 |
| 53.9 | 3.354  | 99.3178  | 40789 | 116 | 9.2E-11  | 0 | 2.29E-11 |
| 12   | 100    | 104.0825 | 42714 | 43  | 0.002087 | 0 | 1.86E-06 |
| 14.1 | 100    | 103.5678 | 42503 | 64  | 1.75E-05 | 0 | 1.31E-09 |
| 22.9 | 36.077 | 93.5674  | 38337 | 86  | 1.17E-07 | 0 | 4.02E-08 |
| 12.1 | 10.257 | 93.4281  | 38277 | 62  | 2.92E-05 | 0 | 2.14E-05 |
| 29.6 | 100    | 93.0625  | 38111 | 81  | 3.67E-07 | 0 | 1.45E-08 |
| 16.5 | 100    | 92.9256  | 38044 | 57  | 9.09E-05 | 0 | 5.12E-06 |
| 1.8  | 100    | 91.7302  | 37531 | 57  | 7.61E-05 | 0 | 0.000476 |
| 32.2 | 6.293  | 93.9314  | 38491 | 60  | 4.93E-05 | 0 | 0.000134 |
| 25.3 | 15.209 | 94.0701  | 38551 | 84  | 1.86E-07 | 0 | 1.85E-08 |
| 6.8  | 47.466 | 94.4363  | 38694 | 61  | 3.66E-05 | 0 | 5.17E-05 |
| 9.8  | 100    | 96.0966  | 39414 | 77  | 1.02E-06 | 0 | 6.98E-07 |
| 16.4 | 100    | 95.9566  | 39351 | 54  | 0.000161 | 0 | 2.43E-05 |
| 13.7 | 100    | 95.5859  | 39180 | 84  | 1.78E-07 | 0 | 2.06E-07 |
| 7.5  | 100    | 95.4485  | 39123 | 60  | 4.52E-05 | 0 | 2.8E-05  |
| 12   | 100    | 95.0741  | 38969 | 58  | 7.95E-05 | 0 | 3.45E-05 |
| 4.8  | 100    | 94.9425  | 38912 | 51  | 0.000372 | 0 | 8.95E-05 |
| 21.4 | 100    | 94.572   | 38750 | 114 | 1.67E-10 | 0 | 7.26E-10 |

|       |        |          |       |    |          |   |          |
|-------|--------|----------|-------|----|----------|---|----------|
| 128.7 | 100    | 48.471   | 17533 | 53 | 0.000137 | 0 | 9.42E-05 |
| 14    | 100    | 48.164   | 17407 | 47 | 0.000531 | 0 | 0.000785 |
| 42    | 100    | 46.3702  | 16682 | 75 | 5.79E-07 | 0 | 0.000784 |
| 79.8  | 24.942 | 34.7715  | 12354 | 31 | 0.011866 | 0 | 0.000454 |
| 62.2  | 100    | 63.8529  | 21659 | 28 | 0.064041 | 0 | 0.000404 |
| 44.5  | 100    | 34.268   | 12168 | 26 | 0.032312 | 0 | 0.001164 |
| 153   | 29.176 | 64.7511  | 22029 | 27 | 0.079884 | 0 | 0.001205 |
| 152.6 | 40.278 | 41.4319  | 14800 | 43 | 0.002081 | 0 | 0.000199 |
| 26.7  | 60.233 | 41.4307  | 14799 | 57 | 6.53E-05 | 0 | 0.001026 |
| 21.2  | 100    | 41.378   | 14780 | 60 | 4.44E-05 | 0 | 1.82E-07 |
| 17.2  | 100    | 41.1392  | 14686 | 45 | 0.001122 | 0 | 0.001399 |
| 43.1  | 100    | 40.9266  | 14601 | 38 | 0.005933 | 0 | 0.000468 |
| 9.9   | 100    | 40.8724  | 14582 | 44 | 0.001696 | 0 | 0.000766 |
| 24.9  | 100    | 38.8751  | 13850 | 27 | 0.067196 | 0 | 0.001155 |
| 23.4  | 100    | 49.176   | 17815 | 58 | 4.37E-05 | 0 | 1.82E-05 |
| 15    | 100    | 59.0109  | 19747 | 65 | 3.7E-06  | 0 | 9.76E-05 |
| 27.7  | 100    | 58.1702  | 19435 | 40 | 0.001306 | 0 | 4.89E-06 |
| 20.6  | 100    | 58.4169  | 19528 | 35 | 0.004768 | 0 | 3.83E-05 |
| 38    | 75.141 | 58.4734  | 19549 | 44 | 0.00056  | 0 | 1.03E-06 |
| 83.4  | 37.981 | 52.126   | 18950 | 59 | 5.32E-05 | 0 | 0.00067  |
| 122.4 | 58.286 | 51.6218  | 18759 | 55 | 0.000127 | 0 | 0.000458 |
| 44.4  | 100    | 52.1786  | 18970 | 46 | 0.000733 | 0 | 0.000745 |
| 44.8  | 100    | 53.1338  | 19333 | 51 | 0.000279 | 0 | 0.000135 |
| 101.2 | 84.654 | 52.6289  | 19142 | 59 | 4.53E-05 | 0 | 0.000251 |
| 41.7  | 11.619 | 65.24    | 22228 | 48 | 0.000626 | 0 | 0.001516 |
| 121.2 | 1.493  | 65.2538  | 22234 | 59 | 4.49E-05 | 0 | 5.41E-05 |
| 86.9  | 43.387 | 16.0997  | 4858  | 36 | 0.006506 | 0 | 0.000412 |
| 36.5  | 100    | 69.2324  | 23879 | 47 | 0.000721 | 0 | 8.07E-05 |
| 32.7  | 61.182 | 16.3371  | 4971  | 40 | 0.002809 | 0 | 0.000154 |
| 37.4  | 100    | 17.4752  | 5523  | 30 | 0.022661 | 0 | 0.000328 |
| 106.8 | 100    | 17.1241  | 5350  | 28 | 0.043682 | 0 | 0.000312 |
| 14    | 100    | 16.9668  | 5275  | 41 | 0.001599 | 0 | 0.000681 |
| 66.1  | 30.427 | 16.6022  | 5098  | 34 | 0.009491 | 0 | 3.92E-05 |
| 26.3  | 100    | 66.7611  | 22875 | 44 | 0.00153  | 0 | 0.000146 |
| 61.2  | 100    | 66.2593  | 22662 | 53 | 0.000197 | 0 | 7.56E-05 |
| 149.1 | 61.544 | 65.7577  | 22455 | 49 | 0.000449 | 0 | 1.79E-05 |
| 190   | 69.593 | 19.4923  | 6432  | 47 | 0.000175 | 0 | 0.000361 |
| 32.3  | 19.971 | 19.1592  | 6287  | 44 | 0.001244 | 0 | 7.26E-05 |
| 70.2  | 19.505 | 18.6502  | 6081  | 44 | 0.001235 | 0 | 4.15E-05 |
| 34.5  | 100    | 18.1646  | 5856  | 30 | 0.051983 | 0 | 0.000179 |
| 63.6  | 17.593 | 18.1416  | 5845  | 39 | 0.003937 | 0 | 0.000156 |
| 80.8  | 100    | 17.8103  | 5686  | 24 | 0.108468 | 0 | 0.000631 |
| 69.4  | 89.978 | 19.6476  | 6495  | 41 | 0.002066 | 0 | 6.11E-05 |
| 25.8  | 100    | 22.1377  | 7493  | 42 | 0.001718 | 0 | 4.78E-05 |
| 31.9  | 100    | 21.6358  | 7291  | 39 | 0.003503 | 0 | 6.92E-05 |
| 44.8  | 100    | 20.6319  | 6891  | 42 | 0.001939 | 0 | 0.000055 |
| 71.8  | 63.943 | 20.2386  | 6736  | 45 | 0.000832 | 0 | 3.58E-05 |
| 184.7 | 5.872  | 19.9955  | 6634  | 45 | 0.00025  | 0 | 0.001532 |
| 5.4   | 100    | 129.3771 | 47661 | 39 | 0.004425 | 0 | 2.41E-05 |
| 1.8   | 100    | 129.3983 | 47671 | 88 | 3.11E-08 | 0 | 6.35E-09 |
| 5.3   | 100    | 129.6496 | 47773 | 43 | 0.001789 | 0 | 0.000431 |
| 0.8   | 100    | 128.3544 | 47234 | 64 | 1.64E-05 | 0 | 8.8E-07  |

|       |        |          |       |     |          |   |          |
|-------|--------|----------|-------|-----|----------|---|----------|
| 32.3  | 100    | 60.1077  | 19986 | 59  | 1.47E-05 | 0 | 0.000844 |
| 2.4   | 100    | 128.8646 | 47445 | 46  | 0.000929 | 0 | 1.01E-05 |
| 2.6   | 100    | 128.8905 | 47457 | 85  | 6.37E-08 | 0 | 4.18E-07 |
| 196.8 | 32.302 | 52.0637  | 16952 | 26  | 0.045338 | 0 | 7E-05    |
| 1.3   | 100    | 131.5545 | 48508 | 36  | 0.009806 | 0 | 8.24E-05 |
| 0.3   | 100    | 132.0581 | 48686 | 54  | 0.000161 | 0 | 5.73E-06 |
| 0.5   | 100    | 129.9951 | 47916 | 48  | 0.00031  | 0 | 2.31E-05 |
| 24.7  | 37.213 | 54.7209  | 17954 | 81  | 3.93E-07 | 0 | 1.35E-09 |
| 62.1  | 100    | 54.4639  | 17855 | 42  | 0.003305 | 0 | 6.57E-06 |
| 3.8   | 100    | 130.4408 | 48092 | 46  | 0.000904 | 0 | 4.53E-05 |
| 29.4  | 100    | 53.6002  | 17531 | 42  | 0.002294 | 0 | 0.000208 |
| 0.9   | 100    | 125.8352 | 46314 | 51  | 0.000297 | 0 | 4.51E-05 |
| 10.2  | 100    | 66.0639  | 22287 | 41  | 0.002822 | 0 | 0.000129 |
| 0     | 100    | 124.7288 | 45865 | 51  | 0.000308 | 0 | 3.2E-05  |
| 17.2  | 100    | 70.002   | 23831 | 53  | 0.000185 | 0 | 2.76E-05 |
| 20    | 100    | 66.685   | 22534 | 38  | 0.00612  | 0 | 0.000104 |
| 0     | 100    | 126.3422 | 46500 | 62  | 2.34E-05 | 0 | 5.16E-06 |
| 0     | 100    | 127.3465 | 46869 | 58  | 5.25E-05 | 0 | 1.48E-06 |
| 1.9   | 100    | 127.3758 | 46880 | 47  | 0.000341 | 0 | 0.000312 |
| 0.8   | 100    | 127.849  | 47047 | 54  | 0.000159 | 0 | 3.06E-05 |
| 0.6   | 100    | 126.8432 | 46681 | 52  | 0.000238 | 0 | 1.93E-05 |
| 6.4   | 100    | 137.1724 | 50724 | 60  | 3.54E-05 | 0 | 4.53E-06 |
| 8.8   | 100    | 137.2501 | 50761 | 74  | 1.71E-06 | 0 | 3.58E-08 |
| 14.1  | 100    | 137.3214 | 50791 | 55  | 0.000121 | 0 | 8.63E-06 |
| 23.8  | 100    | 137.6794 | 50959 | 61  | 2.84E-05 | 0 | 4.41E-07 |
| 0.5   | 100    | 136.2342 | 50339 | 80  | 4.68E-07 | 0 | 5.86E-07 |
| 0.8   | 100    | 136.2734 | 50355 | 60  | 2.37E-05 | 0 | 1.15E-05 |
| 2.4   | 100    | 136.2988 | 50364 | 38  | 0.005101 | 0 | 0.001421 |
| 3.4   | 100    | 136.7416 | 50547 | 65  | 1.33E-05 | 0 | 3.03E-06 |
| 9     | 100    | 136.8077 | 50575 | 69  | 4.38E-06 | 0 | 5.3E-06  |
| 9.9   | 100    | 136.8695 | 50597 | 130 | 2.17E-12 | 0 | 1.83E-13 |
| 2.5   | 100    | 136.6472 | 50505 | 60  | 3.25E-05 | 0 | 1.03E-06 |
| 123.2 | 30.436 | 140.8175 | 55394 | 81  | 3.06E-07 | 0 | 3.11E-09 |
| 91.2  | 4.596  | 140.7919 | 55381 | 72  | 2.59E-06 | 0 | 2.06E-08 |
| 52    | 1.463  | 140.7912 | 55380 | 79  | 5.42E-07 | 0 | 6.45E-08 |
| 42.2  | 92.735 | 140.7489 | 55356 | 117 | 6.92E-11 | 0 | 3.42E-08 |
| 484.8 | 100    | 140.6947 | 55324 | 55  | 0.000142 | 0 | 6.58E-07 |
| 25.3  | 100    | 141.0238 | 55502 | 121 | 1.13E-11 | 0 | 5.19E-14 |
| 17    | 100    | 137.8722 | 51051 | 78  | 5.61E-07 | 0 | 7.52E-08 |
| 12.5  | 100    | 137.8888 | 51059 | 103 | 1.08E-09 | 0 | 6.58E-10 |
| 14.9  | 8.765  | 141.2967 | 55652 | 109 | 2.31E-10 | 0 | 8.08E-14 |
| 0     | 100    | 141.217  | 55611 | 51  | 3.33E-05 | 0 | 0.000628 |
| 1.5   | 19.494 | 141.1474 | 55572 | 45  | 0.000201 | 0 | 1.45E-05 |
| 13    | 23.695 | 141.1466 | 55571 | 101 | 5.78E-10 | 0 | 3.02E-08 |
| 8.7   | 100    | 141.0761 | 55531 | 90  | 4.01E-08 | 0 | 5.48E-07 |
| 7.1   | 100    | 141.0364 | 55509 | 95  | 4.61E-09 | 0 | 7.04E-11 |
| 7.1   | 100    | 141.0364 | 55509 | 98  | 2.19E-09 | 0 | 4.86E-11 |
| 25.3  | 100    | 141.0238 | 55502 | 121 | 1.28E-11 | 0 | 1.08E-13 |
| 1.4   | 100    | 136.1404 | 50300 | 61  | 3E-05    | 0 | 6.53E-06 |
| 1.8   | 100    | 133.2122 | 49140 | 72  | 2.58E-06 | 0 | 1.45E-06 |
| 0.8   | 100    | 133.5738 | 49282 | 42  | 0.002408 | 0 | 0.000151 |
| 1.7   | 100    | 133.7147 | 49335 | 62  | 2.6E-05  | 0 | 8.28E-06 |



|       |        |          |       |     |          |   |          |
|-------|--------|----------|-------|-----|----------|---|----------|
| 1.1   | 100    | 134.0812 | 49474 | 51  | 0.000329 | 0 | 1.59E-05 |
| 5.9   | 100    | 41.0872  | 12909 | 43  | 0.002039 | 0 | 0.000192 |
| 14.6  | 100    | 40.9986  | 12877 | 50  | 0.000354 | 0 | 2.06E-05 |
| 8.1   | 100    | 40.4966  | 12696 | 35  | 0.011593 | 0 | 0.001258 |
| 2.2   | 100    | 134.2172 | 49525 | 75  | 1.44E-06 | 0 | 1.16E-06 |
| 11    | 100    | 39.8653  | 12477 | 39  | 0.005154 | 0 | 0.000265 |
| 1     | 100    | 132.5634 | 48882 | 64  | 1.67E-05 | 0 | 3.43E-07 |
| 0.4   | 100    | 132.5851 | 48891 | 55  | 6.83E-05 | 0 | 3.35E-05 |
| 1.5   | 100    | 133.0703 | 49085 | 43  | 0.0019   | 0 | 1.72E-05 |
| 0.8   | 100    | 133.0897 | 49092 | 61  | 1.82E-05 | 0 | 1.13E-05 |
| 20    | 100    | 39.3611  | 12304 | 59  | 4.62E-05 | 0 | 1.05E-07 |
| 0.8   | 100    | 134.5887 | 49665 | 46  | 0.00104  | 0 | 2.09E-05 |
| 2.6   | 100    | 135.2297 | 49922 | 61  | 3.45E-05 | 0 | 7.13E-06 |
| 5.2   | 100    | 135.2637 | 49937 | 43  | 0.000791 | 0 | 7.75E-05 |
| 63.4  | 100    | 36.3975  | 11291 | 23  | 0.183707 | 0 | 0.000915 |
| 9.4   | 100    | 36.3422  | 11269 | 50  | 0.000356 | 0 | 6.35E-05 |
| 174.1 | 100    | 35.3102  | 10914 | 20  | 0.040963 | 0 | 0.000435 |
| 15.8  | 100    | 36.8479  | 11444 | 43  | 0.002091 | 0 | 0.000251 |
| 202   | 92.25  | 34.3761  | 10602 | 31  | 0.003142 | 0 | 0.000672 |
| 8.9   | 100    | 135.6275 | 50082 | 38  | 0.005394 | 0 | 4.09E-05 |
| 28.4  | 100    | 32.2668  | 9891  | 32  | 0.021016 | 0 | 0.000743 |
| 1.5   | 100    | 135.7333 | 50127 | 62  | 2.56E-05 | 0 | 8.59E-06 |
| 2.1   | 100    | 135.7701 | 50143 | 118 | 3.15E-11 | 0 | 6.64E-10 |
| 36.8  | 100    | 37.0421  | 11508 | 40  | 0.003684 | 0 | 0.000161 |
| 39.9  | 100    | 37.1606  | 11545 | 72  | 2.5E-06  | 0 | 4.62E-07 |
| 8.6   | 100    | 39.1746  | 12239 | 66  | 9.85E-06 | 0 | 1.8E-06  |
| 115.4 | 100    | 39.0544  | 12197 | 44  | 0.001397 | 0 | 1.49E-06 |
| 29.5  | 47.088 | 38.8589  | 12134 | 59  | 4.67E-05 | 0 | 1.82E-06 |
| 18.4  | 100    | 38.6697  | 12067 | 68  | 5.45E-06 | 0 | 7.61E-07 |
| 2.1   | 100    | 134.7209 | 49716 | 69  | 5.12E-06 | 0 | 2.41E-06 |
| 42.1  | 43.146 | 38.551   | 12020 | 59  | 4.72E-05 | 0 | 2.91E-07 |
| 23.3  | 22.583 | 38.3557  | 11948 | 63  | 2E-05    | 0 | 9.98E-07 |
| 20.9  | 100    | 38.1653  | 11879 | 77  | 7.92E-07 | 0 | 9.25E-08 |
| 33.8  | 30.113 | 38.0496  | 11839 | 61  | 2.72E-05 | 0 | 6.04E-07 |
| 24.5  | 10.972 | 37.8539  | 11775 | 63  | 2.08E-05 | 0 | 1.75E-06 |
| 41.1  | 100    | 37.6626  | 11714 | 68  | 5.64E-06 | 0 | 9.22E-07 |
| 33.2  | 17.316 | 37.5458  | 11673 | 54  | 0.000158 | 0 | 2.61E-06 |
| 2.5   | 100    | 135.094  | 49865 | 50  | 0.000342 | 0 | 1.82E-06 |
| 29.3  | 10.134 | 37.3506  | 11610 | 59  | 4.68E-05 | 0 | 1.61E-06 |
| 10.6  | 100    | 116.1521 | 42354 | 58  | 6.47E-05 | 0 | 1.23E-06 |
| 24.1  | 100    | 116.2176 | 42383 | 40  | 0.003864 | 0 | 0.000501 |
| 1.4   | 100    | 116.4414 | 42482 | 68  | 5.99E-06 | 0 | 4.12E-06 |
| 2.9   | 100    | 116.4556 | 42487 | 97  | 4.25E-09 | 0 | 1.66E-08 |
| 21.9  | 3.934  | 116.558  | 42531 | 62  | 1.26E-05 | 0 | 9.13E-06 |
| 20.9  | 100    | 94.9932  | 33732 | 59  | 2.45E-05 | 0 | 5.07E-05 |
| 61.5  | 4.039  | 116.6299 | 42564 | 77  | 4.28E-07 | 0 | 2.1E-07  |
| 2.3   | 100    | 116.6555 | 42575 | 48  | 0.000622 | 0 | 1.94E-05 |
| 12    | 100    | 100.2677 | 35807 | 63  | 1.6E-05  | 0 | 2.61E-06 |
| 1.2   | 100    | 114.6291 | 41714 | 60  | 3.4E-05  | 0 | 1.03E-06 |
| 1.7   | 100    | 114.7019 | 41743 | 40  | 0.003621 | 0 | 0.000208 |
| 10.9  | 100    | 99.7628  | 35605 | 70  | 3.26E-06 | 0 | 1.88E-06 |
| 0.7   | 100    | 114.8913 | 41818 | 42  | 0.002215 | 0 | 0.000155 |

|      |        |          |       |     |          |   |          |
|------|--------|----------|-------|-----|----------|---|----------|
| 27.8 | 61.793 | 116.1205 | 42341 | 69  | 2.83E-06 | 0 | 1.52E-06 |
| 5.2  | 100    | 115.1357 | 41935 | 46  | 0.000922 | 0 | 1.7E-05  |
| 2.6  | 100    | 115.6471 | 42148 | 50  | 0.000402 | 0 | 1.05E-05 |
| 2.6  | 100    | 116.0511 | 42311 | 37  | 0.004013 | 0 | 0.001302 |
| 11.7 | 21.568 | 116.9586 | 42697 | 129 | 2.79E-12 | 0 | 1.48E-13 |
| 4.3  | 20.73  | 117.4632 | 42915 | 140 | 2.34E-13 | 0 | 1.8E-13  |
| 8.2  | 100    | 117.5982 | 42971 | 77  | 3.86E-07 | 0 | 7.86E-08 |
| 4.5  | 60.944 | 117.9667 | 43133 | 126 | 5.27E-12 | 0 | 2.22E-13 |
| 1.5  | 100    | 117.9992 | 43145 | 40  | 0.003489 | 0 | 0.000906 |
| 19.7 | 37.464 | 93.5322  | 33188 | 94  | 1.72E-08 | 0 | 1.01E-09 |
| 12.2 | 100    | 93.4399  | 33153 | 67  | 7.76E-06 | 0 | 5.82E-07 |
| 10.1 | 100    | 93.4319  | 33149 | 45  | 0.001293 | 0 | 0.000411 |
| 27.4 | 11.038 | 93.0278  | 32979 | 76  | 9.43E-07 | 0 | 8E-09    |
| 13.8 | 100    | 117.0709 | 42742 | 111 | 1.6E-10  | 0 | 3.04E-11 |
| 61.2 | 100    | 92.9283  | 32939 | 19  | 0.518558 | 0 | 0.000282 |
| 4.6  | 99.99  | 117.0946 | 42752 | 109 | 2.93E-10 | 0 | 1.25E-09 |
| 7    | 100    | 92.5188  | 32771 | 54  | 0.000184 | 0 | 5.31E-06 |
| 14.7 | 100    | 117.141  | 42773 | 37  | 0.004858 | 0 | 0.000199 |
| 2.2  | 100    | 117.1585 | 42780 | 68  | 5.64E-06 | 0 | 5.25E-07 |
| 14.5 | 100    | 100.7723 | 36002 | 70  | 3.17E-06 | 0 | 1.03E-06 |
| 7.9  | 100    | 109.3569 | 39547 | 56  | 9.05E-05 | 0 | 7.66E-05 |
| 2.3  | 100    | 109.0425 | 39419 | 64  | 1.55E-05 | 0 | 4.88E-07 |
| 9.2  | 100    | 108.8514 | 39344 | 65  | 1.11E-05 | 0 | 1.54E-06 |
| 8.1  | 100    | 108.537  | 39204 | 71  | 2.87E-06 | 0 | 6.85E-08 |
| 2.5  | 100    | 108.4003 | 39143 | 34  | 0.014974 | 0 | 0.00079  |
| 19.5 | 100    | 108.3481 | 39120 | 80  | 3.46E-07 | 0 | 4.11E-08 |
| 13   | 100    | 108.0306 | 38977 | 51  | 0.000297 | 0 | 1.74E-06 |
| 6.5  | 100    | 107.8955 | 38920 | 36  | 0.009026 | 0 | 0.000268 |
| 14.6 | 100    | 107.8462 | 38899 | 66  | 9.24E-06 | 0 | 3.21E-06 |
| 3.5  | 100    | 109.5516 | 39633 | 63  | 2.1E-05  | 0 | 5.81E-07 |
| 8.1  | 100    | 112.0807 | 40646 | 76  | 9.39E-07 | 0 | 2.13E-06 |
| 1.1  | 100    | 112.0786 | 40645 | 81  | 2.71E-07 | 0 | 1.03E-07 |
| 2.7  | 100    | 111.5739 | 40444 | 64  | 1.64E-05 | 0 | 1.2E-06  |
| 2.7  | 100    | 111.0714 | 40247 | 61  | 3.21E-05 | 0 | 9.07E-07 |
| 5.8  | 100    | 110.8924 | 40179 | 55  | 0.000121 | 0 | 4.55E-05 |
| 1.8  | 100    | 110.5668 | 40056 | 61  | 2.78E-05 | 0 | 1.64E-06 |
| 10.1 | 100    | 110.3919 | 39980 | 78  | 6.19E-07 | 0 | 5.29E-08 |
| 0.4  | 100    | 110.1918 | 39896 | 36  | 0.009946 | 0 | 0.000774 |
| 3.1  | 100    | 110.0571 | 39838 | 65  | 1.11E-05 | 0 | 3.72E-07 |
| 8.3  | 100    | 109.867  | 39767 | 59  | 4.25E-05 | 0 | 9.12E-06 |
| 3.1  | 100    | 113.1832 | 41092 | 41  | 0.002549 | 0 | 0.001002 |
| 3.4  | 100    | 107.5294 | 38767 | 74  | 1.62E-06 | 0 | 2.92E-07 |
| 11.4 | 100    | 107.3444 | 38682 | 68  | 5.59E-06 | 0 | 4.3E-07  |
| 24.8 | 100    | 104.3198 | 37415 | 60  | 3.68E-05 | 0 | 1.11E-06 |
| 2.3  | 100    | 104.2272 | 37377 | 68  | 6.07E-06 | 0 | 2.35E-07 |
| 19.6 | 100    | 103.8087 | 37214 | 51  | 0.000261 | 0 | 1.39E-06 |
| 13   | 100    | 103.3031 | 37019 | 46  | 0.000858 | 0 | 1.06E-05 |
| 14.1 | 100    | 102.2937 | 36632 | 76  | 9E-07    | 0 | 1.03E-07 |
| 26.4 | 100    | 101.7911 | 36426 | 76  | 9E-07    | 0 | 1.1E-07  |
| 9.5  | 100    | 114.1223 | 41510 | 32  | 0.021696 | 0 | 0.000282 |
| 28.7 | 100    | 101.2875 | 36209 | 65  | 1.06E-05 | 0 | 4.8E-07  |
| 4.5  | 100    | 101.2409 | 36191 | 40  | 0.00302  | 0 | 0.000662 |

|      |        |          |       |     |          |   |          |
|------|--------|----------|-------|-----|----------|---|----------|
| 11.7 | 100    | 105.0038 | 37688 | 39  | 0.00497  | 0 | 7.53E-05 |
| 36.8 | 100    | 107.0224 | 38553 | 52  | 0.000267 | 0 | 1.89E-06 |
| 2.6  | 100    | 106.8861 | 38494 | 48  | 0.000569 | 0 | 3.47E-05 |
| 18.3 | 100    | 106.8434 | 38474 | 67  | 6.32E-06 | 0 | 8.38E-08 |
| 7.9  | 100    | 106.5185 | 38335 | 71  | 2.77E-06 | 0 | 1.55E-07 |
| 1.6  | 100    | 106.3746 | 38271 | 59  | 4.27E-05 | 0 | 6.08E-05 |
| 12.7 | 100    | 106.3269 | 38251 | 66  | 9.29E-06 | 0 | 1.75E-07 |
| 7.6  | 100    | 106.014  | 38115 | 75  | 1.27E-06 | 0 | 3.8E-08  |
| 2.4  | 100    | 105.8684 | 38052 | 54  | 0.000158 | 0 | 4.78E-05 |
| 13   | 100    | 105.8252 | 38034 | 72  | 2.02E-06 | 0 | 2.49E-07 |
| 6.1  | 100    | 113.6203 | 41283 | 62  | 2.25E-05 | 0 | 6.55E-07 |
| 16   | 100    | 113.691  | 41314 | 68  | 5.06E-06 | 0 | 5.8E-07  |
| 6.9  | 100    | 105.5099 | 37907 | 75  | 1.15E-06 | 0 | 1.52E-07 |
| 0    | 100    | 105.3625 | 37847 | 51  | 0.000267 | 0 | 0.000174 |
| 12.9 | 100    | 105.3238 | 37830 | 69  | 4.92E-06 | 0 | 9.57E-07 |
| 4.2  | 100    | 107.3918 | 38703 | 35  | 0.01087  | 0 | 0.000951 |
| 1.2  | 100    | 122.2014 | 44843 | 54  | 0.000143 | 0 | 8.21E-06 |
| 2.5  | 100    | 122.7073 | 45056 | 70  | 4.17E-06 | 0 | 3.79E-07 |
| 27.2 | 100    | 122.7391 | 45069 | 68  | 5.57E-06 | 0 | 5.49E-07 |
| 1.1  | 100    | 122      | 44765 | 68  | 3.45E-06 | 0 | 2.11E-06 |
| 15.4 | 100    | 78.9627  | 27341 | 30  | 0.039334 | 0 | 0.000925 |
| 56.9 | 12.144 | 78.4591  | 27144 | 82  | 2.31E-07 | 0 | 7.98E-06 |
| 84.2 | 4.093  | 78.4083  | 27126 | 52  | 0.000235 | 0 | 6.92E-05 |
| 12.1 | 100    | 77.9076  | 26931 | 40  | 0.003513 | 0 | 0.000388 |
| 1    | 100    | 121.6974 | 44639 | 64  | 1.62E-05 | 0 | 1.53E-06 |
| 0    | 100    | 124.2255 | 45666 | 36  | 0.00979  | 0 | 8.41E-05 |
| 0    | 100    | 123.7224 | 45478 | 47  | 0.000728 | 0 | 6.84E-05 |
| 26   | 100    | 72.5676  | 24807 | 54  | 9.92E-05 | 0 | 0.000664 |
| 11.9 | 100    | 71.7202  | 24479 | 47  | 0.000695 | 0 | 0.000142 |
| 59.9 | 100    | 74.3229  | 25543 | 53  | 0.000148 | 0 | 0.000548 |
| 35.1 | 33.448 | 74.071   | 25439 | 42  | 0.002194 | 0 | 0.001026 |
| 2.4  | 100    | 123.2188 | 45273 | 62  | 2.49E-05 | 0 | 1.11E-06 |
| 14.4 | 100    | 123.25   | 45286 | 73  | 1.87E-06 | 0 | 2.21E-07 |
| 2    | 100    | 121.4962 | 44559 | 98  | 3.69E-09 | 0 | 1.36E-08 |
| 4.1  | 100    | 118.4681 | 43336 | 120 | 2.36E-11 | 0 | 2.66E-11 |
| 5.9  | 100    | 118.4997 | 43348 | 45  | 0.001197 | 0 | 5.73E-05 |
| 1.8  | 100    | 118.9718 | 43531 | 135 | 6.97E-13 | 0 | 8.84E-12 |
| 1    | 100    | 119.004  | 43543 | 43  | 0.001793 | 0 | 3.89E-05 |
| 12.1 | 100    | 119.4729 | 43727 | 87  | 4.69E-08 | 0 | 1.13E-09 |
| 22.1 | 100    | 81.4179  | 28310 | 33  | 0.017899 | 0 | 0.001512 |
| 3    | 100    | 120.4833 | 44127 | 98  | 3.71E-09 | 0 | 1.07E-09 |
| 1.6  | 100    | 120.6854 | 44207 | 49  | 0.000499 | 0 | 2.03E-05 |
| 25.8 | 55.225 | 80.7269  | 28044 | 66  | 9.23E-06 | 0 | 0.001508 |
| 6.5  | 100    | 120.9917 | 44334 | 126 | 4.91E-12 | 0 | 2.63E-14 |
| 3.1  | 100    | 121.1944 | 44427 | 53  | 0.0002   | 0 | 5.37E-06 |
| 4.7  | 100    | 119.6811 | 43803 | 44  | 0.00149  | 0 | 2.22E-05 |
| 16.9 | 35.72  | 84.2554  | 29434 | 61  | 3.31E-05 | 0 | 4.96E-06 |
| 2.2  | 100    | 119.9765 | 43915 | 106 | 4.93E-10 | 0 | 2.04E-09 |
| 2.7  | 100    | 120.184  | 43998 | 63  | 1.8E-05  | 0 | 1.06E-06 |
| 81.6 | 100    | 141.3114 | 52720 | 100 | 4.37E-09 | 0 | 5.19E-11 |
| 9.2  | 100    | 76.6337  | 28300 | 55  | 0.000125 | 0 | 0.000501 |
| 0.4  | 100    | 141.3698 | 52751 | 69  | 2.36E-06 | 0 | 5.71E-07 |

|       |        |          |       |     |          |   |          |
|-------|--------|----------|-------|-----|----------|---|----------|
| 24.5  | 11.933 | 141.2761 | 52698 | 52  | 0.000265 | 0 | 2.38E-06 |
| 69.3  | 100    | 141.1987 | 52656 | 113 | 3.1E-11  | 0 | 8.43E-09 |
| 22.9  | 100    | 141.203  | 52658 | 65  | 2.03E-06 | 0 | 9.06E-08 |
| 5.9   | 100    | 141.3888 | 52760 | 77  | 9.36E-07 | 0 | 4.15E-07 |
| 37    | 3.67   | 72.8585  | 26772 | 70  | 4.14E-06 | 0 | 4.85E-05 |
| 107   | 0.655  | 72.7479  | 26727 | 61  | 3.44E-05 | 0 | 0.000146 |
| 14.9  | 100    | 73.3641  | 26993 | 60  | 3.92E-05 | 0 | 1.27E-05 |
| 38.7  | 72.583 | 72.2494  | 26508 | 52  | 0.000221 | 0 | 0.000406 |
| 68.5  | 86.009 | 76.1321  | 28092 | 54  | 0.000162 | 0 | 3.18E-05 |
| 24    | 100    | 76.0954  | 28077 | 53  | 0.000174 | 0 | 0.000471 |
| 22.3  | 26.256 | 75.5871  | 27866 | 63  | 1.76E-05 | 0 | 0.000176 |
| 96.8  | 4.349  | 75.5334  | 27842 | 52  | 0.000225 | 0 | 7.67E-05 |
| 56.3  | 49.847 | 75.4723  | 27814 | 40  | 0.00399  | 0 | 3.14E-09 |
| 10.7  | 100    | 87.4426  | 32713 | 43  | 0.002291 | 0 | 7E-08    |
| 5.7   | 100    | 140.842  | 52463 | 84  | 8.28E-08 | 0 | 1.05E-10 |
| 41.7  | 14.012 | 140.8638 | 52474 | 79  | 6.01E-07 | 0 | 2.05E-08 |
| 3.2   | 86.546 | 90.1333  | 33860 | 19  | 0.566811 | 0 | 0.000797 |
| 7.5   | 88.26  | 90.092   | 33842 | 71  | 3.78E-06 | 0 | 1.05E-11 |
| 30.1  | 19.565 | 90.078   | 33836 | 70  | 4.6E-06  | 0 | 4.63E-12 |
| 10    | 100    | 89.1531  | 33455 | 56  | 7.48E-05 | 0 | 0.00091  |
| 20.6  | 100    | 15.2814  | 4265  | 11  | 3.459283 | 0 | 0.001077 |
| 12.5  | 76.317 | 86.2436  | 32195 | 61  | 1.99E-05 | 0 | 3.75E-06 |
| 6.2   | 100    | 86.2373  | 32192 | 58  | 3.53E-05 | 0 | 0.000107 |
| 22.1  | 100    | 19.8223  | 5826  | 59  | 5.37E-05 | 0 | 2.31E-05 |
| 22.1  | 100    | 19.8223  | 5826  | 59  | 5.37E-05 | 0 | 4.19E-05 |
| 38.8  | 100    | 53.6731  | 19052 | 52  | 0.000287 | 0 | 1.63E-06 |
| 16.7  | 100    | 20.3256  | 5985  | 52  | 0.000286 | 0 | 1.67E-06 |
| 16.7  | 100    | 20.3256  | 5985  | 50  | 0.000452 | 0 | 1.99E-06 |
| 15.7  | 7.704  | 53.1694  | 18851 | 67  | 1.06E-05 | 0 | 2.66E-07 |
| 11.4  | 100    | 20.3277  | 5986  | 54  | 0.000164 | 0 | 0.000114 |
| 30.8  | 100    | 52.8721  | 18736 | 39  | 0.006784 | 0 | 1.8E-06  |
| 30    | 100    | 53.3773  | 18934 | 46  | 0.001128 | 0 | 6.31E-07 |
| 22.1  | 100    | 19.8223  | 5826  | 59  | 5.37E-05 | 0 | 1.13E-05 |
| 34.1  | 100    | 54.8996  | 19549 | 43  | 0.001618 | 0 | 0.000424 |
| 33.1  | 100    | 19.8202  | 5825  | 59  | 5.36E-05 | 0 | 1.24E-07 |
| 3     | 100    | 21.8807  | 6474  | 28  | 0.062151 | 0 | 0.000359 |
| 33.1  | 100    | 48.9184  | 17181 | 70  | 2.63E-06 | 0 | 0.000584 |
| 32.1  | 77.376 | 47.7974  | 16720 | 46  | 0.000704 | 0 | 0.000378 |
| 35.7  | 100    | 51.6762  | 18260 | 43  | 0.001221 | 0 | 0.000636 |
| 85.9  | 14.981 | 51.269   | 18099 | 52  | 0.000164 | 0 | 0.00015  |
| 140.1 | 0.613  | 51.17    | 18056 | 57  | 6.17E-05 | 0 | 0.000157 |
| 58.1  | 100    | 17.0378  | 4886  | 12  | 2.588142 | 0 | 0.001269 |
| 24.2  | 100    | 64.3931  | 23357 | 49  | 0.000435 | 0 | 0.000483 |
| 0.4   | 100    | 16.5275  | 4703  | 68  | 1.86E-06 | 0 | 0.000151 |
| 25.6  | 100    | 63.8729  | 23150 | 71  | 2.76E-06 | 0 | 5.67E-05 |
| 117.5 | 100    | 60.9322  | 21961 | 61  | 1.13E-05 | 0 | 0.001314 |
| 31.7  | 100    | 61.4352  | 22164 | 61  | 1.07E-05 | 0 | 0.000356 |
| 156.8 | 69.318 | 60.422   | 21741 | 61  | 1.11E-05 | 0 | 0.000871 |
| 14.2  | 100    | 60.1382  | 21621 | 60  | 3.78E-05 | 0 | 3.79E-08 |
| 121.3 | 50.999 | 59.414   | 21323 | 57  | 2.6E-05  | 0 | 0.000698 |
| 23.3  | 100    | 58.9115  | 21127 | 67  | 2.81E-06 | 0 | 8.61E-05 |
| 92.8  | 2.188  | 63.3706  | 22953 | 68  | 5.68E-06 | 0 | 7.59E-05 |

|       |        |          |       |     |          |   |          |
|-------|--------|----------|-------|-----|----------|---|----------|
| 23.1  | 100    | 63.2111  | 22888 | 66  | 3.08E-06 | 0 | 0.000158 |
| 30.6  | 100    | 62.6862  | 22680 | 63  | 6.01E-06 | 0 | 0.000324 |
| 35.5  | 100    | 61.9365  | 22360 | 58  | 2.23E-05 | 0 | 0.000421 |
| 24.8  | 23.392 | 90.5823  | 34053 | 64  | 1.8E-05  | 0 | 8.04E-12 |
| 15.6  | 100    | 90.5957  | 34059 | 77  | 7.72E-07 | 0 | 2.43E-12 |
| 0.7   | 100    | 90.6395  | 34078 | 43  | 0.002438 | 0 | 3.4E-05  |
| 1.1   | 100    | 139.2906 | 51708 | 96  | 5.3E-09  | 0 | 6.04E-09 |
| 2.5   | 100    | 139.2109 | 51670 | 63  | 2E-05    | 0 | 8.09E-07 |
| 1.6   | 100    | 139.6804 | 51880 | 50  | 0.000352 | 0 | 0.000113 |
| 3.6   | 100    | 139.7235 | 51900 | 72  | 2.35E-06 | 0 | 1.54E-07 |
| 13.2  | 100    | 139.8003 | 51934 | 129 | 2.94E-12 | 0 | 2.64E-14 |
| 9.3   | 100    | 139.1796 | 51655 | 44  | 0.00129  | 0 | 0.000223 |
| 8.9   | 100    | 138.9036 | 51524 | 27  | 0.065129 | 0 | 0.001344 |
| 6.3   | 100    | 129.2604 | 50356 | 63  | 2.37E-05 | 0 | 5.52E-07 |
| 2.5   | 100    | 139.809  | 51938 | 42  | 0.002797 | 0 | 0.000922 |
| 1     | 100    | 117.9    | 45562 | 74  | 1.45E-06 | 0 | 1.2E-06  |
| 29.6  | 100    | 140.2462 | 55081 | 81  | 3.31E-07 | 0 | 4.76E-10 |
| 29.3  | 100    | 140.2348 | 55075 | 47  | 0.000942 | 0 | 8.22E-05 |
| 46    | 100    | 140.216  | 55066 | 18  | 0.594152 | 0 | 0.000269 |
| 24    | 100    | 140.191  | 55054 | 84  | 3.35E-08 | 0 | 3.4E-06  |
| 4.7   | 100    | 139.6965 | 54822 | 45  | 0.001451 | 0 | 0.000142 |
| 4.4   | 100    | 139.4444 | 54712 | 41  | 0.001741 | 0 | 0.000262 |
| 10.1  | 100    | 138.1569 | 51188 | 40  | 0.00356  | 0 | 0.000181 |
| 10.3  | 100    | 138.1874 | 51202 | 65  | 1.09E-05 | 0 | 2.98E-09 |
| 44.9  | 11.039 | 132.6058 | 51762 | 107 | 8.74E-10 | 0 | 7.93E-11 |
| 47.1  | 2.122  | 132.5666 | 51745 | 110 | 3.58E-10 | 0 | 1.06E-11 |
| 296.6 | 95.105 | 132.442  | 51692 | 54  | 0.000152 | 0 | 3.51E-08 |
| 30.1  | 100    | 138.6677 | 51416 | 43  | 0.001898 | 0 | 9.11E-05 |
| 5.3   | 100    | 138.6923 | 51427 | 75  | 1.19E-06 | 0 | 9.6E-09  |
| 15.8  | 100    | 138.7661 | 51460 | 30  | 0.040733 | 0 | 0.000813 |
| 2.1   | 100    | 137.3005 | 53732 | 47  | 0.000778 | 0 | 0.000437 |
| 18.1  | 100    | 138.378  | 51281 | 71  | 2.95E-06 | 0 | 3.15E-07 |
| 2.5   | 100    | 133.5731 | 52187 | 76  | 9.7E-07  | 0 | 6.4E-07  |
| 22.5  | 47.89  | 133.1242 | 52000 | 68  | 5.88E-06 | 0 | 4.16E-07 |
| 27.4  | 5.091  | 133.0709 | 51976 | 116 | 1.04E-10 | 0 | 8.1E-12  |
| 27.5  | 47.436 | 100.3715 | 38175 | 100 | 4.37E-09 | 0 | 3.12E-10 |
| 8.1   | 100    | 99.8663  | 37945 | 63  | 2.24E-05 | 0 | 1.43E-05 |
| 58.3  | 10.097 | 94.0089  | 35409 | 60  | 2.11E-05 | 0 | 7.36E-05 |
| 9.6   | 100    | 91.5937  | 34443 | 58  | 6.28E-05 | 0 | 1.8E-08  |
| 0.4   | 100    | 91.1022  | 34253 | 26  | 0.107767 | 0 | 0.000166 |
| 11.7  | 97.485 | 91.0897  | 34247 | 64  | 1.63E-05 | 0 | 4.6E-10  |
| 178.4 | 6.798  | 94.1779  | 35484 | 62  | 1.38E-05 | 0 | 0.000163 |
| 10.8  | 100    | 95.093   | 35871 | 45  | 0.000677 | 0 | 0.000354 |
| 12.1  | 100    | 94.7091  | 35709 | 48  | 0.000348 | 0 | 0.000742 |
| 0.4   | 100    | 113.4119 | 43654 | 49  | 0.000253 | 0 | 5.41E-05 |
| 8.2   | 100    | 111.3068 | 42769 | 40  | 0.004384 | 0 | 0.00151  |
| 18.9  | 100    | 109.8477 | 42177 | 61  | 2.3E-05  | 0 | 4.31E-06 |
| 0     | 100    | 109.5754 | 42057 | 99  | 1.46E-09 | 0 | 1.07E-07 |
| 0.3   | 100    | 116.8365 | 45132 | 68  | 3.13E-06 | 0 | 1.8E-06  |
| 28.1  | 100    | 140.2375 | 52137 | 54  | 0.000161 | 0 | 2.82E-07 |
| 20.4  | 5.181  | 105.0496 | 40162 | 80  | 2.84E-07 | 0 | 2.37E-08 |
| 11.5  | 3.131  | 105.0489 | 40161 | 86  | 7.01E-08 | 0 | 1.9E-08  |

|      |        |          |       |     |          |   |          |
|------|--------|----------|-------|-----|----------|---|----------|
| 3.2  | 100    | 112.582  | 40853 | 72  | 2.29E-06 | 0 | 4.7E-08  |
| 35.3 | 20.233 | 55.2729  | 20131 | 66  | 1.28E-05 | 0 | 8.31E-08 |
| 89.5 | 100    | 139.7104 | 53759 | 55  | 0.000148 | 0 | 6.96E-08 |
| 10   | 100    | 57.9178  | 21198 | 37  | 0.010552 | 0 | 0.001063 |
| 23.8 | 100    | 110.68   | 41236 | 28  | 0.049679 | 0 | 2.35E-05 |
| 1.9  | 100    | 110.045  | 42726 | 57  | 7.56E-05 | 0 | 3.57E-07 |
| 23.9 | 6.277  | 52.745   | 19127 | 60  | 5.08E-05 | 0 | 7.73E-07 |
| 23   | 50.149 | 108.6847 | 40418 | 83  | 1.57E-07 | 0 | 1.1E-06  |
| 1.5  | 100    | 109.6077 | 42553 | 30  | 0.035526 | 0 | 0.000658 |
| 2.5  | 100    | 109.5429 | 42525 | 51  | 0.000294 | 0 | 2.57E-06 |
| 4.7  | 100    | 109.105  | 42348 | 47  | 0.000656 | 0 | 7.47E-07 |
| 4.2  | 100    | 109.0345 | 42319 | 55  | 9.73E-05 | 0 | 1.34E-07 |
| 31   | 20.568 | 53.1464  | 19282 | 73  | 2.66E-06 | 0 | 6.81E-06 |
| 8.2  | 3.191  | 108.0933 | 40185 | 56  | 9.93E-05 | 0 | 4.33E-05 |
| 39.4 | 6.597  | 108.1035 | 40190 | 77  | 7.9E-07  | 0 | 4.16E-07 |
| 10.2 | 100    | 108.5999 | 40386 | 69  | 5.26E-06 | 0 | 2.93E-06 |
| 6.9  | 100    | 111.4437 | 43294 | 43  | 0.00015  | 0 | 2.41E-06 |
| 2.1  | 100    | 111.1211 | 43171 | 33  | 0.018178 | 0 | 0.000731 |
| 8.1  | 100    | 108.6096 | 40390 | 56  | 0.000108 | 0 | 2.53E-05 |
| 5.5  | 100    | 111.0805 | 43155 | 52  | 1.68E-05 | 0 | 3.8E-06  |
| 4.6  | 100    | 110.9423 | 43094 | 51  | 1.66E-05 | 0 | 7.64E-06 |
| 14.8 | 8.534  | 108.62   | 40395 | 51  | 0.000286 | 0 | 0.000225 |
| 4.6  | 100    | 108.5986 | 42150 | 47  | 0.000714 | 0 | 1.15E-07 |
| 30.3 | 100    | 139.9689 | 53883 | 26  | 0.1026   | 0 | 0.000586 |
| 4.6  | 100    | 109.1124 | 40583 | 44  | 0.001701 | 0 | 0.000272 |
| 6.4  | 100    | 107.0197 | 41516 | 52  | 0.000198 | 0 | 1.67E-08 |
| 26.8 | 28.498 | 54.1544  | 19678 | 72  | 3.04E-06 | 0 | 3.62E-07 |
| 50.2 | 2.463  | 54.2624  | 19722 | 66  | 1.03E-05 | 0 | 2.82E-08 |
| 1.3  | 100    | 106.5873 | 41325 | 41  | 0.002844 | 0 | 2.68E-05 |
| 24.7 | 39.183 | 54.6559  | 19879 | 44  | 0.001912 | 0 | 0.001193 |
| 1.1  | 100    | 106.5143 | 41295 | 53  | 0.000175 | 0 | 6.31E-07 |
| 29.2 | 4.889  | 54.7686  | 19923 | 74  | 2.18E-06 | 0 | 3.06E-08 |
| 27.3 | 9.501  | 54.9017  | 19979 | 72  | 2.96E-06 | 0 | 9.28E-08 |
| 10.1 | 72.372 | 107.0922 | 41547 | 54  | 0.000128 | 0 | 3.09E-10 |
| 5.1  | 72.615 | 107.3579 | 41660 | 130 | 3.97E-12 | 0 | 8.53E-10 |
| 34.8 | 1.991  | 53.2516  | 19323 | 82  | 2.88E-07 | 0 | 5.07E-08 |
| 4.6  | 93.774 | 108.5332 | 42124 | 62  | 2.19E-05 | 0 | 6.16E-10 |
| 3    | 78.274 | 108.0971 | 41950 | 50  | 0.0003   | 0 | 6.4E-06  |
| 5.8  | 78.499 | 108.0226 | 41922 | 71  | 2.55E-06 | 0 | 2.52E-10 |
| 8.1  | 100    | 107.5939 | 41755 | 54  | 0.000146 | 0 | 2.1E-08  |
| 64.4 | 6.751  | 53.7218  | 19508 | 20  | 0.422939 | 0 | 0.001095 |
| 43.3 | 1.611  | 53.759   | 19521 | 64  | 1.68E-05 | 0 | 1.11E-07 |
| 3.8  | 62.61  | 107.521  | 41727 | 70  | 3.67E-06 | 0 | 8E-10    |
| 37.2 | 2.1    | 53.8373  | 19553 | 68  | 6.34E-06 | 0 | 1.77E-08 |
| 29.1 | 15.977 | 53.6488  | 19481 | 58  | 7.83E-05 | 0 | 0.000118 |
| 45.3 | 100    | 138.8855 | 53376 | 42  | 0.001991 | 0 | 1.25E-07 |
| 21.2 | 100    | 113.6758 | 42501 | 81  | 3.12E-07 | 0 | 1.27E-09 |
| 8.9  | 100    | 113.678  | 42502 | 76  | 1.01E-06 | 0 | 3.68E-08 |
| 45.3 | 100    | 138.8855 | 53376 | 42  | 0.001991 | 0 | 1.25E-07 |
| 7.6  | 100    | 113.1654 | 42276 | 108 | 6.19E-10 | 0 | 2.62E-10 |
| 27   | 21.964 | 90.3239  | 34440 | 51  | 0.000233 | 0 | 0.00018  |
| 23.7 | 21.147 | 90.3132  | 34435 | 66  | 7.25E-06 | 0 | 2.48E-05 |

|       |        |          |       |     |          |   |          |
|-------|--------|----------|-------|-----|----------|---|----------|
| 74.4  | 1.778  | 89.8093  | 34218 | 46  | 0.000752 | 0 | 0.000326 |
| 46.4  | 2.564  | 89.8087  | 34217 | 69  | 3.37E-06 | 0 | 4.87E-06 |
| 59.9  | 91.434 | 138.6199 | 53255 | 65  | 1.48E-05 | 0 | 1.35E-08 |
| 25    | 100    | 138.486  | 53200 | 65  | 1.07E-05 | 0 | 1.21E-05 |
| 9.4   | 100    | 114.1812 | 42723 | 57  | 9.34E-05 | 0 | 1E-06    |
| 64.9  | 100    | 138.6294 | 53258 | 27  | 0.063366 | 0 | 4.93E-06 |
| 10.1  | 100    | 138.8029 | 53337 | 50  | 0.000439 | 0 | 5.49E-06 |
| 124.3 | 100    | 138.6877 | 53283 | 36  | 0.006072 | 0 | 3.56E-07 |
| 18    | 100    | 139.4726 | 53648 | 47  | 0.000802 | 0 | 6.5E-05  |
| 10.4  | 100    | 138.9998 | 53430 | 67  | 6.63E-06 | 0 | 1.4E-06  |
| 7.6   | 100    | 112.7972 | 42126 | 63  | 1.86E-05 | 0 | 3.84E-07 |
| 19.1  | 42.288 | 113.1594 | 42273 | 75  | 1.44E-06 | 0 | 3.37E-09 |
| 2.6   | 100    | 112.6684 | 42071 | 44  | 0.0018   | 0 | 8.97E-05 |
| 38.1  | 100    | 139.2051 | 53524 | 65  | 1.42E-05 | 0 | 8.19E-09 |
| 18    | 100    | 139.1332 | 53491 | 31  | 0.026798 | 0 | 0.000123 |
| 17.4  | 100    | 138.9686 | 53415 | 47  | 0.000699 | 0 | 2.72E-05 |
| 164.2 | 100    | 15.3582  | 4738  | 43  | 0.002315 | 0 | 2.69E-05 |
| 16.5  | 100    | 37.7644  | 13102 | 66  | 5.12E-06 | 0 | 6.49E-06 |
| 12.9  | 100    | 102.0631 | 37696 | 64  | 1.28E-05 | 0 | 2.26E-06 |
| 15    | 100    | 101.6015 | 37482 | 35  | 0.009932 | 0 | 6.49E-06 |
| 147   | 23.742 | 15.5699  | 4860  | 23  | 0.111538 | 0 | 0.001542 |
| 56.8  | 94.108 | 15.5517  | 4850  | 29  | 0.034078 | 0 | 0.000162 |
| 5.1   | 74.168 | 104.6929 | 38760 | 47  | 0.000831 | 0 | 6.36E-05 |
| 0.4   | 100    | 102.8524 | 38034 | 46  | 0.000771 | 0 | 0.000577 |
| 136.7 | 15.677 | 16.0867  | 5138  | 26  | 0.066783 | 0 | 0.000469 |
| 20    | 100    | 100.0341 | 36821 | 62  | 2.06E-05 | 0 | 2.45E-06 |
| 174.7 | 40.67  | 17.7068  | 5972  | 27  | 0.06411  | 0 | 0.00103  |
| 57.8  | 27.899 | 140.6558 | 54224 | 90  | 2.5E-08  | 0 | 5.79E-10 |
| 0     | 100    | 99.9694  | 36791 | 38  | 0.006435 | 0 | 0.000259 |
| 129.1 | 5.841  | 18.2992  | 6275  | 24  | 0.114743 | 0 | 0.001289 |
| 94.5  | 3.2    | 18.2422  | 6244  | 40  | 0.003257 | 0 | 0.000131 |
| 209.8 | 20.437 | 140.6521 | 54220 | 125 | 6.62E-12 | 0 | 2.12E-12 |
| 203.8 | 83.783 | 16.6014  | 5381  | 27  | 0.041714 | 0 | 0.001249 |
| 45.8  | 100    | 16.5862  | 5374  | 39  | 0.002662 | 0 | 6.09E-05 |
| 45.6  | 24.29  | 16.0789  | 5133  | 30  | 0.022473 | 0 | 6.01E-05 |
| 2.3   | 100    | 116.6923 | 45500 | 47  | 0.000682 | 0 | 0.000505 |
| 2.7   | 100    | 116.2129 | 45305 | 44  | 0.000795 | 0 | 0.00022  |
| 1.4   | 100    | 116.718  | 45511 | 50  | 0.000203 | 0 | 4.86E-05 |
| 124.1 | 100    | 140.113  | 53952 | 80  | 3.99E-07 | 0 | 5.89E-10 |
| 5.4   | 100    | 140.1217 | 53956 | 82  | 2.77E-07 | 0 | 3.91E-09 |
| 12.5  | 100    | 106.3455 | 39459 | 21  | 0.285179 | 0 | 0.000913 |
| 173.1 | 55.684 | 140.3685 | 54075 | 54  | 0.000134 | 0 | 4.81E-10 |
| 2.9   | 100    | 105.4822 | 39101 | 39  | 0.004428 | 0 | 0.001107 |
| 6.8   | 65.524 | 105.201  | 38985 | 63  | 1.99E-05 | 0 | 7.65E-07 |
| 7.1   | 100    | 40.7844  | 14315 | 61  | 1.7E-05  | 0 | 0.001554 |
| 87.6  | 1.533  | 105.2549 | 39004 | 35  | 0.009603 | 0 | 1.29E-06 |
| 67.6  | 1.149  | 105.3398 | 39042 | 65  | 1.17E-05 | 0 | 7.48E-10 |
| 0.9   | 100    | 105.7019 | 39196 | 73  | 2.02E-06 | 0 | 1.2E-06  |
| 19.2  | 100    | 44.0273  | 15642 | 48  | 0.000628 | 0 | 0.001179 |
| 19.2  | 100    | 44.0273  | 15642 | 48  | 0.000628 | 0 | 0.001179 |
| 57.6  | 100    | 140.3805 | 54081 | 63  | 1.91E-05 | 0 | 2.33E-10 |
| 56.8  | 100    | 140.3827 | 54082 | 39  | 0.004606 | 0 | 5.67E-07 |

|       |        |          |       |     |          |   |          |
|-------|--------|----------|-------|-----|----------|---|----------|
| 19.7  | 34.856 | 105.8448 | 39254 | 55  | 9.62E-05 | 0 | 2.97E-08 |
| 2.4   | 100    | 140.2977 | 52469 | 35  | 0.01205  | 0 | 0.001192 |
| 0.6   | 100    | 140.3368 | 52484 | 57  | 8.09E-05 | 0 | 3.11E-06 |
| 8.1   | 100    | 140.5496 | 52562 | 91  | 2.56E-08 | 0 | 1.25E-09 |
| 18.5  | 51.24  | 140.5641 | 52568 | 95  | 1.15E-08 | 0 | 1.19E-08 |
| 0     | 100    | 140.592  | 52580 | 111 | 1.77E-10 | 0 | 1.03E-08 |
| 0     | 100    | 140.6024 | 52585 | 86  | 6.37E-08 | 0 | 9.14E-08 |
| 5.5   | 100    | 119.4901 | 45584 | 102 | 1.2E-09  | 0 | 1.04E-09 |
| 10.3  | 100    | 119.9924 | 45759 | 80  | 2.22E-07 | 0 | 9.56E-09 |
| 3.3   | 100    | 120.494  | 45932 | 76  | 5.66E-07 | 0 | 1.33E-06 |
| 0.4   | 100    | 120.9962 | 46107 | 43  | 0.001181 | 0 | 0.000915 |
| 21.9  | 100    | 61.7115  | 22327 | 48  | 0.000596 | 0 | 4.49E-05 |
| 21    | 98.753 | 119.419  | 45560 | 84  | 8.42E-08 | 0 | 5.61E-10 |
| 33.9  | 0.753  | 121.7254 | 46008 | 48  | 0.000259 | 0 | 2.56E-05 |
| 24.4  | 53.054 | 118.9155 | 45382 | 85  | 5.91E-08 | 0 | 2.24E-10 |
| 37.2  | 100    | 115.7222 | 44165 | 88  | 3.11E-08 | 0 | 1.13E-10 |
| 8.4   | 100    | 118.7786 | 44722 | 56  | 9.93E-05 | 0 | 9.09E-06 |
| 34.9  | 82.46  | 115.8073 | 44198 | 118 | 3.28E-11 | 0 | 5.06E-11 |
| 28    | 8.718  | 116.2271 | 44362 | 81  | 1.73E-07 | 0 | 6.09E-09 |
| 3.8   | 100    | 116.2606 | 44373 | 39  | 0.00129  | 0 | 0.000334 |
| 53.3  | 100    | 116.2649 | 44375 | 32  | 0.012382 | 0 | 5.59E-06 |
| 2.1   | 100    | 115.6158 | 44126 | 54  | 6.6E-06  | 0 | 0.000115 |
| 19.1  | 28.377 | 115.505  | 44085 | 80  | 2.21E-07 | 0 | 1.6E-08  |
| 36.1  | 40.922 | 114.7928 | 43824 | 52  | 1.8E-05  | 0 | 8.41E-07 |
| 25.6  | 38.065 | 114.9144 | 43865 | 89  | 3.65E-09 | 0 | 9.73E-11 |
| 13    | 100    | 115.0033 | 43893 | 84  | 9.36E-08 | 0 | 1.27E-09 |
| 20.3  | 100    | 115.1145 | 43933 | 89  | 2E-09    | 0 | 3.52E-09 |
| 56.5  | 93.087 | 115.3017 | 44007 | 44  | 0.000104 | 0 | 4.18E-07 |
| 10.4  | 100    | 115.3039 | 44008 | 76  | 4.95E-07 | 0 | 2.17E-07 |
| 20.1  | 61.164 | 115.4176 | 44052 | 80  | 2.44E-08 | 0 | 7.34E-10 |
| 19.3  | 24.921 | 116.3113 | 44393 | 84  | 8.95E-08 | 0 | 3.26E-07 |
| 20.3  | 13.697 | 117.9099 | 45008 | 84  | 8.04E-08 | 0 | 3.89E-10 |
| 0     | 100    | 118.2772 | 45148 | 36  | 0.002374 | 0 | 0.001081 |
| 24.9  | 100    | 118.3256 | 45166 | 105 | 6.17E-10 | 0 | 3.09E-09 |
| 22.7  | 26.014 | 118.4121 | 45200 | 74  | 8.5E-07  | 0 | 1.2E-09  |
| 10    | 100    | 118.8281 | 45349 | 51  | 0.000156 | 0 | 5.25E-05 |
| 4     | 100    | 63.3291  | 22993 | 89  | 1.44E-08 | 0 | 9.21E-06 |
| 32.4  | 67.598 | 117.8205 | 44972 | 95  | 6.15E-09 | 0 | 4.11E-09 |
| 0     | 100    | 117.7742 | 44953 | 54  | 4.51E-05 | 0 | 0.000175 |
| 45.7  | 100    | 117.4491 | 44835 | 30  | 0.018826 | 0 | 0.000107 |
| 66.8  | 100    | 116.3932 | 44427 | 108 | 2.88E-10 | 0 | 5.1E-12  |
| 0     | 100    | 116.7664 | 44570 | 51  | 8.64E-05 | 0 | 1.46E-05 |
| 21.2  | 24.617 | 116.8145 | 44589 | 88  | 3.43E-08 | 0 | 6.02E-08 |
| 0     | 100    | 116.8303 | 44596 | 61  | 7.17E-06 | 0 | 0.000397 |
| 29    | 7.861  | 116.9017 | 44627 | 82  | 1.24E-07 | 0 | 4.88E-09 |
| 103.1 | 9.125  | 62.9113  | 22812 | 33  | 0.006233 | 0 | 0.001341 |
| 0     | 100    | 117.2691 | 44768 | 47  | 0.000215 | 0 | 6.28E-05 |
| 20.1  | 30.406 | 117.3167 | 44786 | 88  | 3.44E-08 | 0 | 1.87E-08 |
| 0     | 100    | 117.3316 | 44792 | 75  | 3.09E-07 | 0 | 3.4E-05  |
| 25.4  | 8.34   | 117.4051 | 44818 | 79  | 2.36E-07 | 0 | 1.39E-09 |
| 4.5   | 100    | 117.4365 | 44830 | 35  | 0.000916 | 0 | 9.44E-06 |
| 35.4  | 33.552 | 63.4153  | 23029 | 39  | 0.001625 | 0 | 0.000175 |



|       |        |          |       |     |          |   |          |
|-------|--------|----------|-------|-----|----------|---|----------|
| 29.7  | 76.679 | 49.3252  | 17284 | 54  | 0.000106 | 0 | 6.55E-05 |
| 18.9  | 100    | 48.7558  | 17059 | 71  | 2.81E-06 | 0 | 1.19E-05 |
| 53.4  | 27.433 | 43.7857  | 15053 | 31  | 0.033883 | 0 | 0.000182 |
| 72.8  | 79.841 | 48.7475  | 17055 | 43  | 0.002043 | 0 | 0.000165 |
| 2.4   | 97.036 | 126.0683 | 47877 | 75  | 1.34E-06 | 0 | 1.08E-07 |
| 72.9  | 100    | 42.1589  | 14405 | 11  | 3.243308 | 0 | 0.001364 |
| 4.6   | 100    | 126.2616 | 47962 | 46  | 0.001157 | 0 | 0.001137 |
| 1.4   | 100    | 126.0864 | 47885 | 42  | 0.002896 | 0 | 0.001497 |
| 36.8  | 100    | 44.2935  | 15265 | 31  | 0.038316 | 0 | 0.000256 |
| 143.3 | 0.623  | 48.2435  | 16864 | 40  | 0.00364  | 0 | 0.001386 |
| 109.1 | 0.715  | 48.2472  | 16866 | 77  | 6.78E-07 | 0 | 2.47E-05 |
| 18.8  | 3.838  | 121.8861 | 46084 | 75  | 4.26E-07 | 0 | 8.53E-06 |
| 82.7  | 2.765  | 31.1552  | 10216 | 48  | 0.000749 | 0 | 2.03E-05 |
| 7.2   | 100    | 55.9316  | 19954 | 55  | 9.14E-05 | 0 | 8.93E-05 |
| 30.2  | 100    | 55.4915  | 19781 | 39  | 0.003661 | 0 | 0.000142 |
| 1.4   | 100    | 127.0769 | 48301 | 82  | 2.68E-07 | 0 | 1.17E-07 |
| 0.9   | 100    | 126.5725 | 48085 | 71  | 3.54E-06 | 0 | 1.07E-05 |
| 8.7   | 100    | 128.091  | 48708 | 91  | 3.37E-08 | 0 | 2.22E-08 |
| 4.9   | 48.727 | 122.2308 | 46236 | 35  | 0.003509 | 0 | 0.000738 |
| 147   | 100    | 18.3879  | 6320  | 37  | 0.005657 | 0 | 0.000101 |
| 1     | 100    | 114.6142 | 43758 | 37  | 0.000338 | 0 | 0.000822 |
| 61    | 16.345 | 76.3591  | 28720 | 63  | 1.83E-05 | 0 | 1.79E-06 |
| 12.3  | 100    | 76.8399  | 28917 | 71  | 2.92E-06 | 0 | 1.83E-06 |
| 19.1  | 100    | 76.8643  | 28927 | 52  | 0.000223 | 0 | 0.000186 |
| 33.9  | 52.104 | 74.6952  | 27775 | 74  | 7.19E-07 | 0 | 1.84E-07 |
| 37.6  | 18.68  | 74.6938  | 27774 | 47  | 0.000367 | 0 | 0.000162 |
| 44.3  | 6.28   | 75.8299  | 28492 | 87  | 6.75E-08 | 0 | 5.98E-08 |
| 64.2  | 3.206  | 75.8581  | 28504 | 63  | 1.88E-05 | 0 | 8.1E-06  |
| 2.1   | 100    | 115.9357 | 43484 | 43  | 0.002165 | 0 | 0.00034  |
| 44.3  | 28.332 | 76.3389  | 28712 | 85  | 1.2E-07  | 0 | 3.01E-08 |
| 12.5  | 100    | 77.349   | 29115 | 59  | 4.28E-05 | 0 | 9.9E-05  |
| 58.2  | 2.381  | 74.5996  | 27729 | 48  | 0.000852 | 0 | 0.001217 |
| 86.1  | 2.326  | 74.5989  | 27728 | 60  | 4.44E-05 | 0 | 7.1E-05  |
| 16.6  | 100    | 73.3669  | 27188 | 22  | 0.139029 | 0 | 0.000629 |
| 17.8  | 100    | 72.8659  | 26966 | 40  | 0.002198 | 0 | 5.22E-05 |
| 11.9  | 100    | 73.8714  | 27406 | 32  | 0.014235 | 0 | 0.000535 |
| 21.6  | 100    | 73.9383  | 27437 | 27  | 0.041463 | 0 | 0.000211 |
| 24    | 100    | 77.3663  | 29122 | 56  | 8.98E-05 | 0 | 0.000136 |
| 8.2   | 100    | 77.8782  | 29344 | 43  | 0.00173  | 0 | 0.000753 |
| 14.8  | 100    | 74.1841  | 27547 | 40  | 0.001526 | 0 | 0.000867 |
| 59.6  | 54.303 | 74.1471  | 27530 | 60  | 5.07E-05 | 0 | 3.43E-05 |
| 25.5  | 100    | 74.0886  | 27506 | 50  | 0.00043  | 0 | 5.67E-05 |
| 4.8   | 100    | 115.0287 | 43082 | 128 | 3.56E-12 | 0 | 4.7E-13  |
| 4     | 100    | 115.2713 | 43190 | 58  | 7.4E-05  | 0 | 2.86E-05 |
| 66.8  | 100    | 72.5572  | 27115 | 78  | 6.42E-07 | 0 | 3.86E-11 |
| 52    | 83.458 | 72.6031  | 27134 | 46  | 0.001073 | 0 | 7.28E-07 |
| 5.8   | 100    | 114.6846 | 42939 | 71  | 3.84E-06 | 0 | 7.93E-07 |
| 7.1   | 100    | 75.3006  | 28263 | 63  | 1.21E-05 | 0 | 0.00017  |
| 27.4  | 100    | 75.3566  | 28287 | 43  | 0.001775 | 0 | 0.000159 |
| 12.4  | 100    | 76.0579  | 28342 | 37  | 0.00663  | 0 | 0.000559 |
| 15.2  | 100    | 137.9617 | 52965 | 37  | 0.007802 | 0 | 0.000216 |
| 23    | 60.725 | 72.3645  | 26758 | 31  | 0.017333 | 0 | 3.31E-05 |

|       |        |          |       |     |          |   |          |
|-------|--------|----------|-------|-----|----------|---|----------|
| 47.6  | 25.377 | 113.786  | 43433 | 44  | 0.000113 | 0 | 1.52E-06 |
| 28.2  | 14.818 | 113.9073 | 43479 | 68  | 4.02E-07 | 0 | 1.13E-09 |
| 32.5  | 17.662 | 114.2911 | 43637 | 47  | 5.55E-05 | 0 | 8.37E-07 |
| 32.1  | 18.271 | 114.411  | 43680 | 79  | 3.16E-08 | 0 | 1.83E-10 |
| 4.3   | 100    | 113.4824 | 43321 | 44  | 0.000917 | 0 | 4.29E-05 |
| 13.4  | 100    | 113.4021 | 43292 | 74  | 1.05E-07 | 0 | 6.93E-10 |
| 2.7   | 100    | 112.4729 | 42955 | 41  | 0.001665 | 0 | 0.000553 |
| 4.5   | 100    | 112.9765 | 43137 | 60  | 1.81E-05 | 0 | 1.21E-05 |
| 46.8  | 16.188 | 71.3534  | 26330 | 43  | 0.001105 | 0 | 9.03E-07 |
| 1.2   | 100    | 87.6342  | 33428 | 54  | 6.39E-05 | 0 | 0.001107 |
| 10.7  | 63.658 | 88.1436  | 33630 | 71  | 1.21E-06 | 0 | 0.000178 |
| 75.9  | 1.554  | 71.8602  | 26545 | 44  | 0.000763 | 0 | 5.73E-06 |
| 23.5  | 12.818 | 71.792   | 26515 | 37  | 0.004586 | 0 | 0.000385 |
| 25.4  | 100    | 71.6591  | 26461 | 38  | 0.002604 | 0 | 0.00036  |
| 19.7  | 24.941 | 71.7929  | 26516 | 108 | 3.81E-10 | 0 | 3.05E-09 |
| 11.5  | 100    | 70.8392  | 26110 | 37  | 0.004492 | 0 | 0.000478 |
| 2.7   | 100    | 116.9478 | 43925 | 50  | 0.000454 | 0 | 0.000124 |
| 139.6 | 17.556 | 45.1996  | 16134 | 21  | 0.328375 | 0 | 0.000383 |
| 18.5  | 100    | 87.1241  | 31428 | 66  | 9.81E-06 | 0 | 8.33E-07 |
| 17.9  | 100    | 86.9032  | 31335 | 20  | 0.409462 | 0 | 0.001001 |
| 32.4  | 100    | 141.6508 | 54817 | 69  | 1.21E-06 | 0 | 2.31E-11 |
| 115.4 | 32.289 | 44.6919  | 15940 | 19  | 0.577959 | 0 | 0.000479 |
| 6.7   | 100    | 87.1342  | 31433 | 50  | 0.000391 | 0 | 0.000298 |
| 30.2  | 100    | 45.8471  | 16410 | 60  | 4.54E-05 | 0 | 1.69E-05 |
| 198   | 16.58  | 46.2079  | 16539 | 23  | 0.188549 | 0 | 0.000159 |
| 160.2 | 16.57  | 45.7067  | 16347 | 21  | 0.313036 | 0 | 0.00023  |
| 61.6  | 1.234  | 87.3642  | 31524 | 78  | 7.4E-07  | 0 | 6E-09    |
| 10.2  | 100    | 46.5038  | 18252 | 48  | 0.000653 | 0 | 0.000949 |
| 12.8  | 100    | 46.4957  | 18248 | 50  | 0.000419 | 0 | 0.000398 |
| 23.1  | 100    | 41.1252  | 14558 | 74  | 1.7E-06  | 0 | 1.63E-06 |
| 23.1  | 100    | 41.1252  | 14558 | 74  | 1.7E-06  | 0 | 1.63E-06 |
| 11.8  | 100    | 41.434   | 14681 | 52  | 0.000216 | 0 | 0.00035  |
| 11.8  | 100    | 41.434   | 14681 | 51  | 0.00028  | 0 | 0.000386 |
| 37.8  | 85.796 | 41.6572  | 14771 | 89  | 4.52E-08 | 0 | 1.22E-06 |
| 114.5 | 77.34  | 50.7075  | 20065 | 55  | 0.000129 | 0 | 0.00111  |
| 19.9  | 100    | 86.6198  | 31210 | 65  | 1.47E-05 | 0 | 1.4E-06  |
| 10.6  | 100    | 86.6257  | 31213 | 44  | 0.00174  | 0 | 0.000923 |
| 37.8  | 85.796 | 41.6572  | 14771 | 89  | 4.52E-08 | 0 | 1.22E-06 |
| 13.1  | 100    | 41.9374  | 14887 | 59  | 4.65E-05 | 0 | 0.000265 |
| 37.1  | 66.341 | 42.1641  | 14972 | 89  | 4.3E-08  | 0 | 3.76E-07 |
| 37.1  | 66.341 | 42.1641  | 14972 | 89  | 4.3E-08  | 0 | 3.76E-07 |
| 15.7  | 100    | 42.4386  | 15077 | 53  | 0.000198 | 0 | 0.000237 |
| 15.7  | 100    | 42.4386  | 15077 | 52  | 0.000248 | 0 | 0.000263 |
| 10    | 100    | 61.2026  | 22967 | 36  | 0.004828 | 0 | 0.001064 |
| 65.9  | 7.7    | 61.7105  | 23171 | 71  | 1.73E-06 | 0 | 6.76E-07 |
| 28.3  | 100    | 87.9104  | 31751 | 42  | 0.002596 | 0 | 5.5E-06  |
| 3.3   | 100    | 88.3787  | 31938 | 47  | 0.000852 | 0 | 9.05E-06 |
| 7.3   | 100    | 88.8819  | 32136 | 63  | 2.01E-05 | 0 | 2.77E-07 |
| 13.7  | 24.67  | 71.3336  | 28938 | 44  | 0.000454 | 0 | 0.000139 |
| 31.9  | 11.205 | 71.4167  | 28975 | 74  | 4.7E-07  | 0 | 7.28E-07 |
| 27.7  | 45.924 | 87.8688  | 31734 | 73  | 1.96E-06 | 0 | 1.15E-08 |
| 45.3  | 2.81   | 87.4061  | 31542 | 46  | 0.000957 | 0 | 1.47E-05 |

|       |        |          |       |     |          |   |          |
|-------|--------|----------|-------|-----|----------|---|----------|
| 27.3  | 100    | 46.8575  | 16790 | 58  | 6.75E-05 | 0 | 1.19E-05 |
| 94.4  | 100    | 47.2184  | 16930 | 20  | 0.43446  | 0 | 0.00032  |
| 5.8   | 46.54  | 87.4751  | 31569 | 57  | 8.99E-05 | 0 | 3.16E-06 |
| 9     | 100    | 62.2365  | 23360 | 49  | 0.000267 | 0 | 0.000475 |
| 45.9  | 33.595 | 62.2148  | 23349 | 63  | 1.18E-05 | 0 | 4.69E-06 |
| 8.2   | 28.92  | 61.7304  | 23181 | 56  | 5.11E-05 | 0 | 0.000283 |
| 34    | 100    | 40.6229  | 14353 | 56  | 9.15E-05 | 0 | 5.53E-05 |
| 7.2   | 100    | 60.2736  | 24158 | 43  | 0.001926 | 0 | 0.000363 |
| 29.6  | 100    | 142.7627 | 49684 | 84  | 1.63E-07 | 0 | 9.39E-10 |
| 105.2 | 100    | 141.5102 | 54738 | 116 | 4.22E-11 | 0 | 3.18E-12 |
| 0.3   | 100    | 60.4797  | 24253 | 83  | 2.67E-08 | 0 | 5.69E-06 |
| 20.3  | 92.291 | 141.5144 | 54740 | 84  | 1.39E-07 | 0 | 6.79E-12 |
| 41.9  | 84.546 | 142.5992 | 49607 | 79  | 4.56E-07 | 0 | 3.85E-09 |
| 7.9   | 1.649  | 60.7832  | 24386 | 97  | 7.4E-09  | 0 | 1.2E-10  |
| 26.4  | 100    | 142.6675 | 49640 | 44  | 0.001681 | 0 | 3.76E-05 |
| 97.3  | 52.748 | 141.502  | 54733 | 125 | 1.06E-11 | 0 | 8.57E-14 |
| 43.3  | 6.548  | 141.4996 | 54731 | 97  | 3.15E-09 | 0 | 8.16E-12 |
| 59.4  | 100    | 141.4865 | 54723 | 110 | 3.46E-10 | 0 | 4.95E-14 |
| 12.8  | 100    | 142.1309 | 49369 | 37  | 0.007873 | 0 | 5.61E-05 |
| 7.7   | 100    | 62.8062  | 25275 | 79  | 4.72E-07 | 0 | 8.28E-10 |
| 7.2   | 100    | 63.3577  | 25505 | 51  | 0.000318 | 0 | 0.000358 |
| 11.5  | 100    | 61.7923  | 24838 | 93  | 1.98E-08 | 0 | 9.43E-11 |
| 14    | 42.949 | 61.2875  | 24613 | 97  | 7.32E-09 | 0 | 2.84E-10 |
| 20.6  | 73.637 | 80.9626  | 28877 | 40  | 0.002663 | 0 | 3.12E-06 |
| 10.7  | 63.289 | 62.298   | 25065 | 78  | 5.26E-07 | 0 | 2.19E-09 |
| 4.3   | 100    | 141.5208 | 54743 | 49  | 0.000195 | 0 | 6.68E-06 |
| 9.1   | 100    | 83.3184  | 29830 | 28  | 0.053793 | 0 | 9.65E-05 |
| 45.5  | 45.695 | 36.944   | 12938 | 63  | 1.17E-05 | 0 | 5.06E-06 |
| 60    | 100    | 53.1278  | 21128 | 47  | 0.000723 | 0 | 0.000779 |
| 3.1   | 100    | 141.6268 | 54804 | 45  | 0.001285 | 0 | 1.27E-05 |
| 11.6  | 100    | 85.578   | 30762 | 38  | 0.007243 | 0 | 1.19E-05 |
| 11.9  | 5.936  | 141.612  | 54795 | 75  | 1.2E-06  | 0 | 1.62E-09 |
| 52.4  | 100    | 36.5486  | 12781 | 42  | 0.001172 | 0 | 0.000216 |
| 42.9  | 100    | 51.7167  | 20505 | 61  | 3.19E-05 | 0 | 0.0001   |
| 34    | 100    | 40.6229  | 14353 | 56  | 9.15E-05 | 0 | 5.53E-05 |
| 58.8  | 77.29  | 51.2127  | 20285 | 54  | 0.000152 | 0 | 0.000314 |
| 6.7   | 100    | 79.5478  | 28266 | 44  | 0.001824 | 0 | 0.000905 |
| 34.2  | 100    | 52.2241  | 20722 | 54  | 0.000151 | 0 | 0.000246 |
| 22.6  | 100    | 84.0553  | 30123 | 37  | 0.007491 | 0 | 2.01E-05 |
| 7.9   | 100    | 84.6838  | 30388 | 71  | 3.46E-06 | 0 | 2.33E-08 |
| 14.7  | 100    | 84.7473  | 30416 | 32  | 0.026604 | 0 | 0.000303 |
| 107.8 | 100    | 55.7928  | 22252 | 46  | 0.000631 | 0 | 0.001293 |
| 140.9 | 69.194 | 141.3075 | 54623 | 103 | 1.52E-09 | 0 | 9.1E-10  |
| 14.1  | 11.141 | 141.3037 | 54620 | 63  | 1.57E-05 | 0 | 2.2E-07  |
| 2.8   | 100    | 141.7934 | 54895 | 89  | 4.07E-08 | 0 | 5.02E-09 |
| 2     | 100    | 86.5491  | 32032 | 56  | 3.89E-05 | 0 | 0.001094 |
| 15    | 51.321 | 75.7505  | 30818 | 112 | 2.73E-10 | 0 | 3.69E-10 |
| 12.7  | 100    | 41.0062  | 15868 | 64  | 8.93E-06 | 0 | 0.000342 |
| 51.2  | 100    | 21.2902  | 7656  | 26  | 0.076983 | 0 | 0.000754 |
| 6.9   | 57.915 | 95.7014  | 34941 | 90  | 3.81E-08 | 0 | 5.63E-08 |
| 11.1  | 100    | 97.7528  | 35811 | 67  | 6.97E-06 | 0 | 1.67E-06 |
| 49.1  | 16.731 | 93.1197  | 33874 | 83  | 1.82E-07 | 0 | 5.1E-06  |

|       |        |          |       |     |          |   |          |
|-------|--------|----------|-------|-----|----------|---|----------|
| 84.3  | 83.273 | 20.1741  | 7161  | 42  | 0.002017 | 0 | 3E-05    |
| 57.5  | 100    | 31.6776  | 11997 | 21  | 0.153571 | 0 | 0.000338 |
| 15    | 100    | 73.3535  | 29823 | 38  | 0.001665 | 0 | 0.000451 |
| 6.1   | 100    | 73.1842  | 29748 | 48  | 0.000651 | 0 | 6.42E-06 |
| 60.1  | 7.177  | 140.8163 | 54318 | 60  | 3.71E-05 | 0 | 2.92E-09 |
| 5.7   | 99.014 | 75.7688  | 30826 | 50  | 0.000486 | 0 | 0.000121 |
| 31.7  | 16.108 | 117.5404 | 43104 | 82  | 1.21E-07 | 0 | 9.37E-10 |
| 0     | 100    | 117.4717 | 43076 | 66  | 3.06E-06 | 0 | 7.26E-07 |
| 97.8  | 3.469  | 23.5088  | 8610  | 43  | 0.000868 | 0 | 7.94E-06 |
| 3.6   | 100    | 119.4186 | 43758 | 67  | 4.38E-06 | 0 | 4.74E-06 |
| 31.3  | 100    | 96.6048  | 35340 | 77  | 6.86E-07 | 0 | 3.34E-10 |
| 56.1  | 98.267 | 117.4054 | 43049 | 94  | 8.08E-09 | 0 | 4.57E-09 |
| 16.6  | 100    | 119.6803 | 43848 | 82  | 1.31E-07 | 0 | 5.49E-10 |
| 0     | 100    | 117.1572 | 42956 | 95  | 3.74E-09 | 0 | 7.88E-07 |
| 55.9  | 100    | 117.0342 | 42914 | 105 | 6.87E-10 | 0 | 4.35E-12 |
| 30.8  | 10.753 | 117.0117 | 42906 | 80  | 1.73E-07 | 0 | 4.32E-10 |
| 0     | 100    | 116.9677 | 42888 | 55  | 2.99E-05 | 0 | 2.49E-05 |
| 5.3   | 100    | 119.9203 | 43932 | 43  | 0.00101  | 0 | 0.000107 |
| 9     | 100    | 120.1831 | 44028 | 67  | 4.27E-06 | 0 | 6.96E-07 |
| 3.3   | 100    | 120.6846 | 44194 | 62  | 1.36E-05 | 0 | 2.53E-06 |
| 1     | 100    | 121.1871 | 44359 | 41  | 0.001634 | 0 | 0.000442 |
| 31.5  | 28.638 | 116.897  | 42864 | 97  | 4.23E-09 | 0 | 4.89E-10 |
| 12.5  | 100    | 118.9139 | 43595 | 93  | 9.82E-09 | 0 | 5.12E-08 |
| 26.4  | 51.732 | 118.6186 | 43500 | 83  | 1.13E-07 | 0 | 3.57E-10 |
| 21.3  | 100    | 96.67    | 35370 | 67  | 6.64E-06 | 0 | 1.29E-07 |
| 21.7  | 22.348 | 140.8186 | 54321 | 60  | 4.39E-05 | 0 | 7.53E-10 |
| 28.4  | 100    | 118.413  | 43430 | 104 | 8.74E-10 | 0 | 4.11E-10 |
| 11.3  | 100    | 77.8065  | 27502 | 59  | 4.81E-05 | 0 | 0.001405 |
| 23.1  | 100    | 118.117  | 43329 | 117 | 4.31E-11 | 0 | 8.74E-13 |
| 29.4  | 30.986 | 118.0465 | 43302 | 87  | 4.45E-08 | 0 | 2.81E-10 |
| 153.9 | 5.39   | 23.2014  | 8481  | 24  | 0.086034 | 0 | 0.000398 |
| 0.9   | 100    | 117.9749 | 43270 | 49  | 0.000165 | 0 | 0.00122  |
| 25.2  | 86     | 119.1221 | 43662 | 76  | 4.65E-07 | 0 | 1.73E-08 |
| 25.3  | 54.451 | 117.9092 | 43243 | 119 | 2.54E-11 | 0 | 2.03E-11 |
| 7.3   | 100    | 119.1786 | 43683 | 102 | 1.15E-09 | 0 | 1.46E-10 |
| 0     | 100    | 117.6611 | 43153 | 61  | 9.17E-06 | 0 | 0.000258 |
| 38.2  | 100    | 116.7265 | 42797 | 23  | 0.103935 | 0 | 7.47E-05 |
| 24.9  | 100    | 24.014   | 8827  | 40  | 0.002044 | 0 | 3.72E-05 |
| 1.8   | 100    | 140.3173 | 50193 | 52  | 0.00024  | 0 | 5.14E-06 |
| 90.5  | 100    | 75.5004  | 30708 | 48  | 0.00068  | 0 | 4.67E-07 |
| 7.5   | 100    | 113.6125 | 41741 | 75  | 7.37E-07 | 0 | 8.24E-08 |
| 14.3  | 97.79  | 96.2194  | 35172 | 69  | 5.35E-06 | 0 | 2.08E-06 |
| 11    | 100    | 113.1092 | 41578 | 52  | 0.000139 | 0 | 2.86E-06 |
| 3     | 100    | 112.3699 | 41321 | 58  | 3.49E-05 | 0 | 2.72E-06 |
| 29.2  | 3.639  | 96.1266  | 35130 | 70  | 2.9E-06  | 0 | 2.37E-08 |
| 10.2  | 68.191 | 97.2481  | 35609 | 40  | 0.003086 | 0 | 2.88E-05 |
| 58.1  | 2.443  | 96.1027  | 35119 | 83  | 1.7E-07  | 0 | 8.05E-11 |
| 13.3  | 100    | 73.9606  | 30087 | 64  | 1.74E-05 | 0 | 6.63E-07 |
| 5.7   | 100    | 140.9344 | 50414 | 59  | 5.46E-05 | 0 | 1.44E-05 |
| 4.3   | 100    | 140.2771 | 50181 | 54  | 0.000132 | 0 | 5.75E-06 |
| 0     | 100    | 116.6553 | 42769 | 121 | 8.29E-12 | 0 | 9.09E-08 |
| 25    | 24.192 | 116.5089 | 42718 | 84  | 8.38E-08 | 0 | 2.81E-10 |

|       |        |          |       |     |          |          |          |
|-------|--------|----------|-------|-----|----------|----------|----------|
| 0     | 100    | 116.4649 | 42701 | 47  | 0.0002   | 0        | 0.000414 |
| 35.1  | 12.245 | 116.3947 | 42677 | 113 | 1.08E-10 | 0        | 1.53E-10 |
| 0     | 100    | 116.1535 | 42594 | 108 | 1.71E-10 | 0        | 5.09E-08 |
| 136.7 | 100    | 24.5212  | 9055  | 38  | 0.003817 | 0        | 4.78E-06 |
| 26.7  | 100    | 116.0089 | 42547 | 105 | 6.95E-10 | 0        | 3.63E-12 |
| 26.6  | 9.11   | 75.3761  | 30652 | 65  | 1.54E-05 | 0        | 5.01E-08 |
| 31.2  | 58.233 | 115.8928 | 42504 | 78  | 3.46E-07 | 0        | 1.27E-07 |
| 24    | 41.596 | 115.6238 | 42414 | 74  | 8.36E-07 | 0        | 1.69E-09 |
| 20.8  | 100    | 115.4759 | 42364 | 38  | 0.002886 | 0        | 1.45E-06 |
| 5.3   | 100    | 115.3914 | 42332 | 34  | 0.007866 | 0        | 0.001043 |
| 7.6   | 100    | 114.1169 | 41899 | 59  | 2.53E-05 | 0        | 2.06E-06 |
| 6.8   | 100    | 99.0025  | 36350 | 45  | 0.00113  | 0        | 0.000253 |
| 49.5  | 7.148  | 90.2958  | 32720 | 52  | 0.000214 | 0        | 9.39E-08 |
| 21.6  | 12.803 | 71.9208  | 29202 | 66  | 2.72E-06 | 0        | 3.49E-06 |
| 43    | 2.699  | 90.2477  | 32700 | 49  | 0.000431 | 0        | 6.97E-06 |
| 36.2  | 5.885  | 19.2518  | 6739  | 40  | 0.002997 | 0        | 0.0002   |
| 9.9   | 100    | 90.8029  | 32930 | 58  | 6.31E-05 | 0        | 2.08E-08 |
| 20.6  | 100    | 90.756   | 32910 | 48  | 0.000604 | 0        | 1.55E-06 |
| 1.2   | 100    | 90.2992  | 32722 | 86  | 1.09E-07 | 0        | 8.84E-07 |
| 5.4   | 100    | 98.9593  | 36329 | 51  | 0.00027  | 0        | 2.01E-06 |
| 64.5  | 15.335 | 57.9783  | 21010 | 65  | 8.29E-06 | 0        | 1.81E-06 |
| 44.4  | 10.325 | 57.5781  | 20860 | 82  | 1.48E-07 | 0        | 1.14E-06 |
| 79.8  | 2.885  | 57.477   | 20823 | 67  | 4.86E-06 | 0        | 9.84E-06 |
| 18.8  | 100    | 89.7891  | 32495 | 45  | 0.001042 | 0        | 2.79E-07 |
| 10.3  | 100    | 89.7429  | 32476 | 28  | 0.053614 | 0        | 0.000545 |
| 43.9  | 100    | 58.0819  | 21048 | 82  | 1.58E-07 | 0        | 7.95E-07 |
| 14.9  | 100    | 57.0718  | 20659 | 69  | 3.76E-06 | 0        | 4.16E-05 |
| 0     | 100    | 89.7913  | 32496 | 66  | 1.07E-05 | 0        | 0.000167 |
| 99.2  | 6.572  | 40.2124  | 15539 | 40  | 0.003564 | 0        | 0.000443 |
| 3.9   | 100    | 99.4629  | 36555 | 57  | 8.16E-05 | 0        | 2.44E-06 |
| 12.6  | 100    | 89.936   | 32561 | 48  | 0.000667 | 0        | 1.33E-06 |
| 45.1  | 6.561  | 18.7436  | 6494  | 42  | 0.001769 | 0        | 0.000124 |
| 16.5  | 8.842  | 71.8361  | 29163 | 62  | 6.92E-06 | 0        | 8.37E-06 |
| 7.9   | 100    | 99.5107  | 36577 | 43  | 0.001823 | 0        | 0.0006   |
| 92.1  | 43.188 | 140.864  | 54349 | 72  | 2.22E-06 | 0        | 5.39E-11 |
| 86.7  | 26.098 | 19.9234  | 7051  | 40  | 0.003204 | 0        | 0.000344 |
| 41.5  | 40.304 | 75.8777  | 30874 | 72  | 3.08E-06 | 0        | 9.89E-09 |
| 15.4  | 100    | 72.8477  | 29606 | 47  | 0.000212 | 0        | 5.25E-05 |
| 24.6  | 100    | 98.4937  | 36124 | 41  | 0.002768 | 0        | 0.000218 |
| 9.6   | 64.356 | 72.4253  | 29423 | 62  | 7.84E-06 | 0        | 1.15E-05 |
| 18.6  | 100    | 78.5128  | 27816 | 47  | 0.000713 | 0        | 0.000565 |
| 16    | 82.458 | 19.3091  | 6765  | 52  | 0.000195 | 0        | 0.000736 |
| 8.6   | 64.244 | 72.3422  | 29386 | 60  | 1.13E-05 | 0        | 1.21E-05 |
| 0     | 100    | 131.5769 | 48518 | 38  | 0.003345 | 0.000141 | 0.001753 |
| 122.6 | 100    | 19.031   | 6633  | 32  | 0.021196 | 0.000141 | 0.001707 |
| 195.1 | 100    | 33.8725  | 10433 | 25  | 0.01214  | 0.000141 | 0.001647 |
| 8.8   | 100    | 97.1083  | 35550 | 41  | 0.002405 | 0.000141 | 0.00172  |
| 9     | 100    | 101.3728 | 36244 | 41  | 0.003294 | 0.000141 | 0.001596 |
| 11.3  | 100    | 95.2985  | 35958 | 37  | 0.004238 | 0.000141 | 0.00164  |
| 83.1  | 100    | 55.9107  | 20448 | 43  | 0.001187 | 0.000141 | 0.001774 |
| 120.9 | 100    | 77.7468  | 27474 | 41  | 0.003181 | 0.000141 | 0.001683 |
| 7.9   | 100    | 35.8422  | 11093 | 37  | 0.00801  | 0.000141 | 0.00157  |

|       |       |          |       |    |          |          |          |
|-------|-------|----------|-------|----|----------|----------|----------|
| 6     | 100   | 109.1239 | 39452 | 31 | 0.026736 | 0.000141 | 0.001794 |
| 43.4  | 100   | 47.686   | 18730 | 15 | 1.53276  | 0.000141 | 0.001653 |
| 151.2 | 0.614 | 59.9144  | 21529 | 61 | 7.4E-06  | 0.000141 | 0.001767 |
| 8.3   | 100   | 88.5137  | 31992 | 26 | 0.101441 | 0.000141 | 0.001787 |
| 23.8  | 100   | 57.556   | 20588 | 55 | 4.22E-05 | 0.000141 | 0.00165  |
| 3.4   | 100   | 99.7898  | 37455 | 39 | 0.005112 | 0.000141 | 0.001562 |
| 29.2  | 100   | 68.2142  | 23456 | 19 | 0.469878 | 0.000141 | 0.001584 |
| 0.7   | 100   | 121.4811 | 45382 | 28 | 0.06136  | 0.000141 | 0.001771 |
| 189.3 | 70.82 | 53.3231  | 18931 | 14 | 0.923715 | 0.000141 | 0.001752 |
| 0     | 100   | 115.9606 | 42529 | 40 | 0.001019 | 0.000141 | 0.001786 |
| 38.7  | 100   | 35.1051  | 11919 | 28 | 0.06024  | 0.000141 | 0.001566 |
| 1.9   | 100   | 118.5037 | 43350 | 37 | 0.007044 | 0.000141 | 0.001691 |
| 8.9   | 100   | 48.2987  | 17462 | 44 | 0.001097 | 0.000141 | 0.001712 |
| 18    | 100   | 80.9099  | 32957 | 16 | 1.101168 | 0.000273 | 0.002124 |
| 10.5  | 100   | 23.9599  | 7151  | 29 | 0.03175  | 0.000273 | 0.001865 |
| 131.5 | 4.119 | 43.7031  | 15020 | 14 | 1.896589 | 0.000273 | 0.00208  |
| 41    | 100   | 99.7621  | 36694 | 54 | 5.13E-05 | 0.000273 | 0.001905 |
| 5.2   | 100   | 70.9579  | 26464 | 32 | 0.019899 | 0.000273 | 0.002009 |
| 3.2   | 100   | 106.141  | 39371 | 39 | 0.005205 | 0.000273 | 0.001928 |
| 6.9   | 100   | 86.9756  | 32966 | 45 | 0.000437 | 0.000273 | 0.001979 |
| 128.9 | 5.034 | 46.7141  | 16741 | 18 | 0.69697  | 0.000273 | 0.001826 |
| 18.4  | 100   | 38.8794  | 13852 | 28 | 0.059634 | 0.000273 | 0.001853 |
| 26.1  | 100   | 48.8064  | 17668 | 46 | 0.000688 | 0.000273 | 0.002081 |
| 1.9   | 100   | 127.0161 | 46745 | 35 | 0.010276 | 0.000273 | 0.002023 |
| 35.6  | 100   | 72.4027  | 24742 | 49 | 0.000396 | 0.000273 | 0.002115 |
| 5.7   | 100   | 113.9931 | 43513 | 32 | 0.012159 | 0.000273 | 0.002044 |
| 2.7   | 100   | 67.9675  | 25053 | 51 | 0.000291 | 0.000273 | 0.001909 |
| 2.9   | 100   | 83.9994  | 30098 | 22 | 0.229002 | 0.000273 | 0.002008 |
| 3.2   | 100   | 94.6617  | 35688 | 40 | 0.002156 | 0.000273 | 0.00213  |
| 69.5  | 100   | 34.9482  | 10746 | 19 | 0.365805 | 0.000273 | 0.002044 |
| 6.7   | 100   | 17.4395  | 5210  | 62 | 1.13E-05 | 0.000273 | 0.001894 |
| 27.8  | 100   | 55.3705  | 20231 | 22 | 0.156096 | 0.000273 | 0.001839 |
| 83.6  | 1.266 | 48.6729  | 17612 | 55 | 8.42E-05 | 0.000273 | 0.002126 |
| 33.7  | 100   | 27.4469  | 9071  | 19 | 0.044819 | 0.000273 | 0.002126 |
| 97.5  | 8.875 | 56.294   | 20599 | 46 | 0.000629 | 0.000273 | 0.001931 |
| 12.4  | 100   | 60.3975  | 21730 | 50 | 0.000141 | 0.000407 | 0.002134 |
| 12.9  | 100   | 142.133  | 49370 | 34 | 0.016424 | 0.000407 | 0.002145 |
| 6.4   | 100   | 116.4405 | 43702 | 24 | 0.17741  | 0.000407 | 0.002135 |
| 8.8   | 100   | 59.2586  | 19835 | 36 | 0.009807 | 0.000407 | 0.002155 |
| 42.5  | 100   | 62.4468  | 22612 | 23 | 0.179971 | 0.000407 | 0.002154 |
| 4.2   | 100   | 111.1989 | 40299 | 28 | 0.064958 | 0.000525 | 0.002188 |
| 2.4   | 100   | 133.2438 | 49153 | 35 | 0.010666 | 0.000525 | 0.002204 |
| 38.8  | 100   | 17.1055  | 4779  | 12 | 2.67905  | 0.000525 | 0.00231  |
| 32.7  | 100   | 137.7567 | 50996 | 26 | 0.114153 | 0.000525 | 0.002497 |
| 11.7  | 100   | 106.0647 | 40617 | 27 | 0.053285 | 0.000525 | 0.002245 |
| 17.6  | 100   | 110.8038 | 42564 | 42 | 0.003076 | 0.000525 | 0.002635 |
| 0.4   | 100   | 128.5972 | 48941 | 38 | 0.007038 | 0.000525 | 0.002354 |
| 2     | 100   | 92.4725  | 32753 | 18 | 0.681799 | 0.000525 | 0.00218  |
| 1.7   | 100   | 114.1974 | 41542 | 37 | 0.006768 | 0.000525 | 0.00242  |
| 6.6   | 100   | 101.3169 | 36220 | 18 | 0.503628 | 0.000525 | 0.002254 |
| 6.1   | 100   | 114.4993 | 43712 | 34 | 0.007644 | 0.000525 | 0.002253 |
| 4.8   | 100   | 113.7312 | 41332 | 18 | 0.57533  | 0.000525 | 0.002553 |

|       |        |          |       |    |          |          |          |
|-------|--------|----------|-------|----|----------|----------|----------|
| 44.3  | 7.404  | 94.2063  | 35495 | 51 | 0.000175 | 0.000525 | 0.002566 |
| 0.8   | 100    | 125.3326 | 46119 | 23 | 0.203126 | 0.000525 | 0.002407 |
| 32.6  | 100    | 64.4057  | 21657 | 37 | 0.006127 | 0.000525 | 0.002299 |
| 0     | 100    | 128.3803 | 47245 | 31 | 0.016073 | 0.000525 | 0.002623 |
| 5.6   | 100    | 111.8283 | 43452 | 30 | 0.042216 | 0.000525 | 0.00237  |
| 1.2   | 100    | 110.5505 | 42932 | 24 | 0.140523 | 0.000525 | 0.00241  |
| 5.4   | 100    | 72.9282  | 29640 | 28 | 0.01715  | 0.000525 | 0.002168 |
| 71.4  | 92.267 | 16.8459  | 5216  | 17 | 0.487872 | 0.000525 | 0.002347 |
| 8     | 100    | 100.539  | 37044 | 32 | 0.023497 | 0.000525 | 0.002335 |
| 0.4   | 100    | 90.5431  | 37015 | 28 | 0.064261 | 0.000525 | 0.002198 |
| 19.7  | 100    | 52.4208  | 18565 | 29 | 0.041442 | 0.000525 | 0.002166 |
| 44    | 52.917 | 80.8286  | 28821 | 20 | 0.240119 | 0.000525 | 0.00244  |
| 2.5   | 100    | 116.4441 | 43704 | 37 | 0.008203 | 0.000525 | 0.002595 |
| 77.8  | 8.649  | 93.1339  | 33881 | 40 | 0.004112 | 0.000525 | 0.00236  |
| 1.9   | 100    | 118.293  | 48569 | 22 | 0.225099 | 0.000525 | 0.002241 |
| 1.4   | 100    | 108.7151 | 44660 | 32 | 0.023772 | 0.000525 | 0.002477 |
| 22    | 100    | 34.959   | 12426 | 50 | 0.000155 | 0.000525 | 0.002556 |
| 0     | 100    | 125.8542 | 46896 | 49 | 0.000441 | 0.00065  | 0.002723 |
| 71.6  | 100    | 74.083   | 25444 | 56 | 6.68E-05 | 0.00065  | 0.002667 |
| 8.3   | 100    | 90.1602  | 33870 | 49 | 0.000308 | 0.00065  | 0.002755 |
| 20    | 100    | 74.3709  | 27875 | 41 | 0.002888 | 0.00065  | 0.002723 |
| 4.6   | 100    | 40.0485  | 13788 | 37 | 0.008635 | 0.00065  | 0.00273  |
| 3.7   | 100    | 86.7084  | 32279 | 38 | 0.006368 | 0.00065  | 0.002669 |
| 1.4   | 100    | 117.2216 | 45710 | 29 | 0.024396 | 0.00065  | 0.002773 |
| 56.2  | 100    | 17.859   | 5406  | 12 | 2.929085 | 0.00065  | 0.002707 |
| 0.4   | 100    | 140.3351 | 50200 | 25 | 0.108054 | 0.00065  | 0.002758 |
| 71.9  | 100    | 72.1711  | 26475 | 51 | 0.000246 | 0.00065  | 0.002726 |
| 26.5  | 100    | 48.0679  | 17367 | 41 | 0.001967 | 0.00065  | 0.002669 |
| 13.2  | 100    | 86.9357  | 35513 | 51 | 0.000327 | 0.00065  | 0.002754 |
| 0     | 100    | 130.5022 | 48117 | 30 | 0.022308 | 0.000758 | 0.002811 |
| 1.3   | 100    | 139.7293 | 57117 | 35 | 0.014002 | 0.000758 | 0.003027 |
| 0     | 100    | 108.7476 | 44674 | 23 | 0.193884 | 0.000758 | 0.002872 |
| 13.8  | 100    | 50.6956  | 20059 | 41 | 0.00345  | 0.000758 | 0.002864 |
| 0.4   | 100    | 129.7711 | 50571 | 36 | 0.009918 | 0.000758 | 0.003199 |
| 108.9 | 100    | 51.5618  | 16760 | 20 | 0.199225 | 0.000758 | 0.003014 |
| 2.4   | 100    | 111.9679 | 42772 | 27 | 0.038134 | 0.000758 | 0.002861 |
| 46.3  | 100    | 36.6199  | 12499 | 23 | 0.182326 | 0.000758 | 0.002972 |
| 3.3   | 100    | 85.1854  | 30595 | 23 | 0.20182  | 0.000758 | 0.003213 |
| 3     | 100    | 94.8918  | 33695 | 41 | 0.001837 | 0.000758 | 0.003027 |
| 12.4  | 100    | 55.9937  | 22341 | 37 | 0.006953 | 0.000758 | 0.00299  |
| 61.8  | 100    | 53.633   | 21335 | 44 | 0.001599 | 0.000758 | 0.003099 |
| 17    | 100    | 67.2629  | 23083 | 30 | 0.040037 | 0.000758 | 0.003194 |
| 31    | 100    | 17.8564  | 5054  | 16 | 1.097412 | 0.000758 | 0.003045 |
| 35.8  | 100    | 41.9588  | 13219 | 35 | 0.011125 | 0.000758 | 0.003166 |
| 11.6  | 100    | 17.1034  | 4778  | 63 | 2.08E-05 | 0.000758 | 0.002915 |
| 7.8   | 100    | 105.6581 | 39178 | 33 | 0.016198 | 0.000758 | 0.00284  |
| 28.3  | 100    | 38.1205  | 12859 | 27 | 0.077608 | 0.000758 | 0.003191 |
| 13.3  | 100    | 16.6378  | 5399  | 42 | 0.002818 | 0.000758 | 0.002814 |
| 0     | 100    | 134.6103 | 49674 | 31 | 0.015818 | 0.000758 | 0.002948 |
| 2     | 100    | 93.4319  | 34926 | 36 | 0.009742 | 0.000758 | 0.00314  |
| 28.5  | 44.716 | 73.2518  | 26943 | 35 | 0.011285 | 0.000758 | 0.002859 |
| 90.5  | 100    | 45.6033  | 16291 | 12 | 2.362489 | 0.000758 | 0.003233 |

|       |        |          |       |    |          |          |          |
|-------|--------|----------|-------|----|----------|----------|----------|
| 213.9 | 40.524 | 23.5481  | 6941  | 32 | 0.025428 | 0.000868 | 0.00358  |
| 25.2  | 100    | 73.8265  | 25332 | 40 | 0.002778 | 0.000868 | 0.003597 |
| 1.7   | 100    | 110.011  | 42712 | 26 | 0.106897 | 0.000868 | 0.003577 |
| 298.4 | 49.584 | 18.2805  | 6263  | 19 | 0.474671 | 0.000868 | 0.003602 |
| 24.6  | 100    | 55.1339  | 18116 | 46 | 0.000336 | 0.000868 | 0.003476 |
| 33    | 100    | 92.9318  | 33791 | 14 | 1.249757 | 0.000868 | 0.003489 |
| 150   | 56.309 | 56.9377  | 20809 | 13 | 1.218074 | 0.000868 | 0.003332 |
| 18.9  | 100    | 61.8196  | 20850 | 16 | 0.378759 | 0.000868 | 0.003252 |
| 104.6 | 5.921  | 56.413   | 20646 | 43 | 0.001081 | 0.000868 | 0.003529 |
| 3.1   | 100    | 116.996  | 42711 | 28 | 0.053416 | 0.000868 | 0.00326  |
| 0.3   | 100    | 132.7091 | 48941 | 33 | 0.023495 | 0.000868 | 0.003436 |
| 39    | 100    | 34.454   | 12239 | 50 | 0.00015  | 0.000868 | 0.003552 |
| 8.1   | 100    | 95.5917  | 34893 | 36 | 0.007347 | 0.000868 | 0.003447 |
| 6     | 100    | 95.6195  | 34905 | 26 | 0.078858 | 0.000868 | 0.003362 |
| 2.1   | 100    | 74.791   | 28042 | 50 | 0.000217 | 0.000868 | 0.003272 |
| 18.5  | 100    | 73.2634  | 26948 | 40 | 0.003052 | 0.000868 | 0.003568 |
| 9.9   | 100    | 59.643   | 21421 | 50 | 0.000313 | 0.000868 | 0.003352 |
| 7.5   | 100    | 89.6584  | 33653 | 50 | 0.000333 | 0.000868 | 0.003331 |
| 0.8   | 100    | 112.2082 | 40700 | 23 | 0.203126 | 0.000868 | 0.003453 |
| 8     | 100    | 115.1636 | 43952 | 32 | 0.001083 | 0.000868 | 0.003279 |
| 2.8   | 100    | 91.7426  | 37537 | 39 | 0.005264 | 0.000868 | 0.003505 |
| 7.1   | 100    | 97.9688  | 40214 | 36 | 0.012031 | 0.000951 | 0.004353 |
| 19.8  | 100    | 18.9142  | 6188  | 42 | 0.001988 | 0.000951 | 0.004197 |
| 5.2   | 100    | 106.173  | 39386 | 32 | 0.019973 | 0.000951 | 0.004322 |
| 34.4  | 100    | 54.1726  | 19253 | 45 | 0.000363 | 0.000951 | 0.004428 |
| 25.9  | 100    | 41.3016  | 14521 | 29 | 0.02298  | 0.000951 | 0.004103 |
| 8.4   | 100    | 48.0378  | 17246 | 63 | 1.04E-05 | 0.000951 | 0.003658 |
| 110.7 | 100    | 59.2226  | 21704 | 55 | 0.000109 | 0.000951 | 0.003647 |
| 213.6 | 100    | 15.7883  | 4710  | 49 | 0.000109 | 0.000951 | 0.00415  |
| 53.2  | 100    | 50.761   | 17904 | 40 | 0.003029 | 0.000951 | 0.004227 |
| 11.8  | 100    | 109.278  | 40652 | 19 | 0.160708 | 0.000951 | 0.003715 |
| 42.1  | 100    | 49.6153  | 17399 | 50 | 0.000321 | 0.000951 | 0.00407  |
| 18    | 100    | 92.6291  | 33657 | 31 | 0.032708 | 0.000951 | 0.00392  |
| 21.7  | 100    | 64.8819  | 23560 | 43 | 0.001844 | 0.000951 | 0.003755 |
| 18.5  | 100    | 63.8866  | 23156 | 34 | 0.014671 | 0.000951 | 0.003951 |
| 2.5   | 100    | 134.5982 | 49669 | 33 | 0.022907 | 0.000951 | 0.003813 |
| 26.6  | 100    | 31.6584  | 10403 | 35 | 0.012724 | 0.000951 | 0.003791 |
| 12.8  | 100    | 89.1573  | 36460 | 42 | 0.002805 | 0.000951 | 0.004054 |
| 8.3   | 100    | 59.3884  | 21313 | 41 | 0.001037 | 0.000951 | 0.004128 |
| 37.5  | 100    | 17.8133  | 5171  | 14 | 1.466605 | 0.000951 | 0.003831 |
| 23.6  | 100    | 30.617   | 10761 | 29 | 0.030998 | 0.000951 | 0.003917 |
| 461   | 100    | 16.6114  | 5386  | 16 | 1.110153 | 0.000951 | 0.00374  |
| 10    | 100    | 32.1744  | 9808  | 31 | 0.015426 | 0.000951 | 0.004377 |
| 0.8   | 100    | 131.3612 | 53880 | 17 | 0.676375 | 0.000951 | 0.004157 |
| 5.3   | 100    | 115.1247 | 47258 | 27 | 0.058752 | 0.000951 | 0.004042 |
| 0.5   | 100    | 139.9206 | 51989 | 26 | 0.089139 | 0.000951 | 0.004005 |
| 0     | 55.429 | 125.3523 | 46718 | 50 | 0.000351 | 0.000951 | 0.004031 |
| 3.8   | 100    | 89.9164  | 31726 | 39 | 0.004354 | 0.000951 | 0.00408  |
| 1     | 100    | 118.8326 | 48815 | 29 | 0.033369 | 0.000951 | 0.003706 |
| 50.3  | 5.718  | 110.2994 | 42372 | 46 | 0.001148 | 0.000951 | 0.003829 |
| 3.8   | 100    | 89.9164  | 31726 | 39 | 0.004354 | 0.000951 | 0.00408  |
| 12.2  | 100    | 90.4458  | 33991 | 34 | 0.008659 | 0.000951 | 0.003832 |



|       |        |          |       |    |          |          |          |
|-------|--------|----------|-------|----|----------|----------|----------|
| 219.7 | 100    | 22.1075  | 7060  | 29 | 0.049487 | 0.000951 | 0.004005 |
| 1.3   | 100    | 117.8376 | 48387 | 23 | 0.184694 | 0.000951 | 0.003757 |
| 9.2   | 100    | 35.3291  | 10920 | 36 | 0.001075 | 0.001022 | 0.005288 |
| 16.6  | 100    | 55.9287  | 19948 | 38 | 0.004877 | 0.001022 | 0.004804 |
| 68    | 100    | 31.1055  | 10194 | 23 | 0.20299  | 0.001022 | 0.004691 |
| 282.5 | 77.682 | 15.7254  | 4949  | 44 | 0.000312 | 0.001022 | 0.005362 |
| 22.4  | 100    | 28.5178  | 9463  | 21 | 0.149398 | 0.001022 | 0.004776 |
| 0.3   | 100    | 126.8744 | 46692 | 26 | 0.060726 | 0.001022 | 0.004708 |
| 34.6  | 100    | 63.9236  | 21464 | 45 | 0.000392 | 0.001022 | 0.005726 |
| 11.6  | 100    | 55.5891  | 18393 | 42 | 0.00088  | 0.001022 | 0.005624 |
| 15.5  | 100    | 88.654   | 36266 | 43 | 0.002145 | 0.001022 | 0.005306 |
| 30.9  | 100    | 72.3567  | 26559 | 41 | 0.003107 | 0.001022 | 0.00539  |
| 55.9  | 9.829  | 72.6739  | 26698 | 58 | 4.39E-05 | 0.001022 | 0.0054   |
| 70.1  | 23.845 | 56.4139  | 20647 | 37 | 0.00422  | 0.001022 | 0.004714 |
| 40.8  | 100    | 50.4823  | 17759 | 47 | 0.000696 | 0.001022 | 0.005488 |
| 19.1  | 100    | 51.7388  | 18803 | 39 | 0.003422 | 0.001022 | 0.005254 |
| 111.7 | 1.35   | 63.385   | 22960 | 36 | 0.009084 | 0.001022 | 0.005629 |
| 0     | 100    | 118.1623 | 43346 | 55 | 3.08E-05 | 0.001022 | 0.005326 |
| 49.6  | 67.893 | 23.8427  | 8754  | 34 | 0.015066 | 0.001022 | 0.005058 |
| 28.6  | 100    | 64.3159  | 21622 | 39 | 0.004053 | 0.001022 | 0.00523  |
| 0.4   | 100    | 134.0984 | 49481 | 33 | 0.010126 | 0.001022 | 0.00555  |
| 2.6   | 100    | 57.4816  | 19155 | 27 | 0.02873  | 0.001022 | 0.00555  |
| 27.8  | 42.886 | 18.296   | 6271  | 38 | 0.00426  | 0.001022 | 0.004812 |
| 8.1   | 100    | 18.1742  | 5298  | 26 | 0.108951 | 0.001022 | 0.004883 |
| 11.2  | 5.316  | 110.142  | 42297 | 38 | 0.00667  | 0.001022 | 0.004626 |
| 0.9   | 100    | 56.687   | 21222 | 49 | 0.000153 | 0.001022 | 0.005067 |
| 28.1  | 100    | 44.7629  | 14231 | 26 | 0.099387 | 0.001022 | 0.005279 |
| 19.2  | 100    | 28.9835  | 10096 | 24 | 0.073288 | 0.001022 | 0.004721 |
| 26.2  | 100    | 90.3193  | 32732 | 29 | 0.050498 | 0.001022 | 0.005433 |
| 9.2   | 100    | 93.6389  | 34091 | 33 | 0.020048 | 0.001022 | 0.004934 |
| 183.8 | 21.21  | 44.2069  | 15230 | 13 | 2.305827 | 0.001022 | 0.004673 |
| 17    | 100    | 136.3764 | 53351 | 15 | 0.881363 | 0.001022 | 0.005598 |
| 0.4   | 100    | 127.8774 | 47058 | 30 | 0.022716 | 0.001022 | 0.005161 |
| 0.9   | 100    | 96.8883  | 36288 | 26 | 0.095831 | 0.001022 | 0.005226 |
| 34.6  | 100    | 45.2755  | 17707 | 65 | 5.01E-06 | 0.001022 | 0.004611 |
| 10.8  | 100    | 47.5333  | 17047 | 62 | 1.33E-05 | 0.001022 | 0.005504 |
| 61.1  | 100    | 47.9431  | 17203 | 9  | 5.324921 | 0.001022 | 0.004791 |
| 1.1   | 100    | 107.2033 | 44058 | 21 | 0.376657 | 0.001022 | 0.005152 |
| 9.8   | 100    | 61.3236  | 20454 | 48 | 0.000485 | 0.001022 | 0.00522  |
| 3.4   | 100    | 139.8654 | 51963 | 28 | 0.073357 | 0.001022 | 0.005824 |
| 0.3   | 100    | 124.4484 | 48348 | 51 | 0.000308 | 0.001022 | 0.0047   |
| 19.3  | 100    | 51.7971  | 18312 | 37 | 0.006101 | 0.001022 | 0.005496 |
| 6     | 100    | 117.2488 | 45297 | 30 | 0.04604  | 0.001022 | 0.005642 |
| 181.4 | 7.358  | 57.9952  | 20777 | 62 | 2.24E-05 | 0.001022 | 0.005072 |
| 1.2   | 38.529 | 141.1467 | 54895 | 47 | 0.000803 | 0.001022 | 0.005266 |
| 22    | 100    | 51.6824  | 16908 | 45 | 0.001183 | 0.001022 | 0.004627 |
| 1.5   | 100    | 117.7264 | 45917 | 28 | 0.032823 | 0.001022 | 0.004614 |
| 4     | 100    | 111.5783 | 40446 | 24 | 0.150767 | 0.001022 | 0.005526 |
| 4.2   | 100    | 41.8972  | 14970 | 30 | 0.047475 | 0.001114 | 0.005929 |
| 221.4 | 100    | 22.119   | 7064  | 36 | 0.009928 | 0.001114 | 0.006368 |
| 8.9   | 100    | 33.2683  | 11233 | 46 | 0.001321 | 0.001114 | 0.006192 |
| 34.6  | 100    | 33.3175  | 11521 | 46 | 0.000905 | 0.001114 | 0.005968 |

|       |        |          |       |    |          |          |          |
|-------|--------|----------|-------|----|----------|----------|----------|
| 3.6   | 100    | 40.9965  | 12862 | 51 | 0.000193 | 0.001114 | 0.005933 |
| 9.8   | 100    | 83.7521  | 29240 | 31 | 0.036239 | 0.001114 | 0.006163 |
| 1     | 38.379 | 60.8658  | 24424 | 47 | 0.000683 | 0.001114 | 0.006205 |
| 54.6  | 100    | 105.5662 | 39138 | 44 | 0.000626 | 0.001114 | 0.006439 |
| 2.1   | 100    | 90.676   | 34093 | 44 | 0.000994 | 0.001114 | 0.006064 |
| 9.5   | 100    | 89.8087  | 32503 | 34 | 0.018987 | 0.001114 | 0.006305 |
| 10.3  | 100    | 39.5448  | 13602 | 37 | 0.010027 | 0.001114 | 0.006341 |
| 17.9  | 100    | 55.1569  | 20083 | 43 | 0.002226 | 0.001114 | 0.006008 |
| 1.4   | 100    | 100.5409 | 38255 | 28 | 0.06769  | 0.001114 | 0.005978 |
| 43.9  | 100    | 56.4308  | 20596 | 17 | 0.491519 | 0.001114 | 0.006368 |
| 0.8   | 100    | 103.7244 | 37183 | 22 | 0.240306 | 0.001114 | 0.006311 |
| 3.1   | 100    | 123.7526 | 45487 | 32 | 0.023412 | 0.00121  | 0.006867 |
| 69.9  | 100    | 63.0558  | 22879 | 18 | 0.610696 | 0.00121  | 0.006722 |
| 175.2 | 16.395 | 73.5809  | 25226 | 56 | 6.33E-05 | 0.00121  | 0.006721 |
| 33    | 100    | 50.7943  | 17886 | 19 | 0.505472 | 0.00121  | 0.006537 |
| 45.8  | 100    | 43.2833  | 14853 | 13 | 2.182458 | 0.00121  | 0.006502 |
| 0.4   | 100    | 124.5196 | 51131 | 16 | 1.009928 | 0.00121  | 0.006845 |
| 20.5  | 100    | 33.0573  | 10158 | 49 | 0.000191 | 0.00121  | 0.006526 |
| 56.4  | 100    | 56.7042  | 20245 | 45 | 0.000416 | 0.00121  | 0.006596 |
| 0.3   | 100    | 125.0214 | 51332 | 12 | 2.328488 | 0.001308 | 0.007013 |
| 16    | 100    | 68.7283  | 23667 | 34 | 0.014799 | 0.001308 | 0.007186 |
| 0.8   | 100    | 114.1834 | 42724 | 21 | 0.329953 | 0.001308 | 0.00712  |
| 0     | 100    | 125.9639 | 47789 | 36 | 0.002694 | 0.001308 | 0.006983 |
| 35.3  | 100    | 104.98   | 38884 | 15 | 0.989565 | 0.001308 | 0.006932 |
| 1.9   | 100    | 86.587   | 32225 | 26 | 0.105187 | 0.001308 | 0.007108 |
| 29.7  | 100    | 54.8837  | 18119 | 42 | 0.000636 | 0.001308 | 0.007076 |
| 115   | 100    | 18.8039  | 6523  | 21 | 0.297096 | 0.001308 | 0.007012 |
| 17.5  | 100    | 56.1049  | 18590 | 28 | 0.019721 | 0.001308 | 0.006937 |
| 30.5  | 100    | 32.9472  | 11116 | 19 | 0.217142 | 0.00141  | 0.00726  |
| 105.8 | 48.571 | 49.1142  | 17204 | 47 | 0.000554 | 0.00141  | 0.007274 |
| 26.2  | 100    | 54.7843  | 21827 | 44 | 0.000926 | 0.00141  | 0.007333 |
| 0     | 100    | 125.2813 | 47567 | 40 | 0.001252 | 0.00141  | 0.007461 |
| 28.2  | 100    | 48.4057  | 16970 | 55 | 9.14E-05 | 0.00141  | 0.007439 |
| 28.5  | 100    | 68.6856  | 23314 | 14 | 1.51829  | 0.001498 | 0.008019 |
| 50    | 100    | 24.9179  | 7814  | 37 | 0.007866 | 0.001498 | 0.007963 |
| 11.7  | 100    | 71.2309  | 24703 | 22 | 0.274267 | 0.001498 | 0.007574 |
| 19.2  | 100    | 56.2821  | 18663 | 42 | 0.002264 | 0.001498 | 0.007662 |
| 17.1  | 100    | 45.0785  | 17616 | 35 | 0.008035 | 0.001498 | 0.007469 |
| 191.1 | 78.367 | 52.6819  | 19102 | 56 | 0.000102 | 0.001498 | 0.007981 |
| 4.1   | 100    | 115.7046 | 45080 | 31 | 0.018087 | 0.001498 | 0.007859 |
| 30.5  | 100    | 52.1755  | 18457 | 39 | 0.003435 | 0.001498 | 0.007625 |
| 9.7   | 100    | 64.3787  | 23350 | 40 | 0.003392 | 0.001498 | 0.008029 |
| 14.3  | 100    | 56.3544  | 22489 | 56 | 0.000107 | 0.001576 | 0.008273 |
| 52.3  | 100    | 36.9241  | 12615 | 36 | 0.007648 | 0.001576 | 0.008787 |
| 2.2   | 100    | 115.6288 | 47453 | 25 | 0.114433 | 0.001576 | 0.008851 |
| 6.2   | 100    | 96.3765  | 34291 | 33 | 0.017664 | 0.001576 | 0.008541 |
| 5.4   | 100    | 119.3329 | 45530 | 24 | 0.078393 | 0.001576 | 0.008833 |
| 0     | 100    | 118.7794 | 45331 | 31 | 0.008481 | 0.001576 | 0.008078 |
| 10.9  | 100    | 46.5204  | 14888 | 22 | 0.239772 | 0.001576 | 0.008117 |
| 3     | 100    | 83.8634  | 29284 | 34 | 0.020273 | 0.001576 | 0.00872  |
| 33.6  | 31.903 | 71.5079  | 26686 | 48 | 0.000668 | 0.001576 | 0.008424 |
| 35.4  | 100    | 46.3955  | 16127 | 24 | 0.153675 | 0.001576 | 0.008585 |

|       |        |          |       |    |          |          |          |
|-------|--------|----------|-------|----|----------|----------|----------|
| 66.4  | 100    | 33.9527  | 12052 | 50 | 0.00017  | 0.001576 | 0.008378 |
| 89.2  | 100    | 47.7418  | 16658 | 20 | 0.433901 | 0.001576 | 0.008656 |
| 9.2   | 100    | 51.5386  | 18189 | 23 | 0.197814 | 0.001576 | 0.008559 |
| 20.3  | 100    | 17.1982  | 4816  | 16 | 1.119402 | 0.001576 | 0.0085   |
| 43.5  | 100    | 32.4375  | 11466 | 43 | 0.000676 | 0.001576 | 0.008305 |
| 273.9 | 100    | 43.2014  | 14822 | 2  | 27.18729 | 0.001576 | 0.008153 |
| 2.2   | 100    | 135.3827 | 49984 | 29 | 0.040702 | 0.001576 | 0.0085   |
| 154.5 | 100    | 24.0506  | 7107  | 32 | 0.02672  | 0.001576 | 0.008518 |
| 45.1  | 100    | 52.184   | 17096 | 38 | 0.006192 | 0.001576 | 0.008265 |
| 5.3   | 100    | 61.2238  | 22977 | 28 | 0.03269  | 0.001576 | 0.00882  |
| 68.2  | 100    | 57.8979  | 19182 | 47 | 0.000243 | 0.001576 | 0.008295 |
| 39.3  | 100    | 33.3057  | 12673 | 44 | 0.000641 | 0.001576 | 0.008874 |
| 8.4   | 100    | 72.0965  | 26925 | 28 | 0.05816  | 0.001677 | 0.008927 |
| 25.5  | 100    | 59.7901  | 20038 | 52 | 0.000201 | 0.001677 | 0.008912 |
| 51.8  | 96.386 | 19.9838  | 6628  | 42 | 0.000518 | 0.001677 | 0.008924 |
| 2.9   | 100    | 41.5927  | 13088 | 24 | 0.160309 | 0.001758 | 0.009033 |
| 25.7  | 100    | 45.9857  | 14689 | 52 | 9.34E-05 | 0.001758 | 0.009247 |
| 38.5  | 62.972 | 61.8354  | 22678 | 64 | 1.31E-05 | 0.001758 | 0.009312 |
| 1.8   | 100    | 114.1856 | 43594 | 21 | 0.022764 | 0.001758 | 0.009123 |
| 3.9   | 100    | 95.2831  | 35951 | 28 | 0.055475 | 0.001758 | 0.009289 |
| 2.2   | 100    | 94.4666  | 33539 | 25 | 0.12011  | 0.001758 | 0.009214 |
| 41.7  | 100    | 23.4884  | 7583  | 13 | 0.989318 | 0.001758 | 0.009318 |
| 11.8  | 100    | 16.8175  | 4804  | 35 | 0.006416 | 0.001758 | 0.009028 |
| 19.9  | 100    | 137.8934 | 54001 | 16 | 0.967294 | 0.001758 | 0.009115 |
| 29.3  | 100    | 80.7708  | 29992 | 42 | 0.002483 | 0.001758 | 0.009149 |
| 9.6   | 100    | 19.2414  | 5646  | 16 | 0.781127 | 0.001758 | 0.00952  |
| 8.1   | 100    | 19.3158  | 5670  | 29 | 0.061515 | 0.001758 | 0.009486 |
| 8.5   | 100    | 16.82    | 4805  | 35 | 0.005953 | 0.001854 | 0.009725 |
| 29    | 100    | 33.8186  | 11725 | 45 | 0.000949 | 0.001854 | 0.009899 |
| 55.8  | 70.524 | 72.682   | 26702 | 38 | 0.004726 | 0.001854 | 0.009848 |
| 9.2   | 100    | 75.4468  | 28080 | 37 | 0.007879 | 0.001945 | 0.01004  |
| 0.8   | 100    | 89.6013  | 36649 | 26 | 0.106531 | 0.001945 | 0.01006  |
| 29.6  | 100    | 60.3925  | 20097 | 40 | 0.000999 | 0.001945 | 0.01     |
| 95.2  | 100    | 24.5545  | 7274  | 27 | 0.074962 | 0.001945 | 0.01019  |
| 75.7  | 100    | 48.1046  | 16809 | 41 | 0.002415 | 0.002012 | 0.0111   |
| 14.8  | 100    | 21.447   | 6337  | 55 | 3.16E-05 | 0.002012 | 0.01074  |
| 0     | 100    | 104.3507 | 37427 | 26 | 0.093816 | 0.002012 | 0.01045  |
| 11.3  | 100    | 54.3318  | 19319 | 37 | 0.005243 | 0.002012 | 0.01047  |
| 10    | 100    | 70.6542  | 25866 | 33 | 0.016528 | 0.002012 | 0.01087  |
| 1.8   | 100    | 100.2184 | 41181 | 28 | 0.068657 | 0.002012 | 0.01126  |
| 25.4  | 100    | 32.8456  | 10836 | 33 | 0.019309 | 0.002012 | 0.01046  |
| 1.4   | 100    | 109.6841 | 39693 | 20 | 0.390132 | 0.002012 | 0.01088  |
| 34.2  | 100    | 81.2771  | 30195 | 41 | 0.003202 | 0.002012 | 0.0108   |
| 49.3  | 100    | 78.1647  | 27028 | 42 | 0.002553 | 0.002012 | 0.01117  |
| 17.3  | 100    | 51.1877  | 16719 | 30 | 0.0356   | 0.002012 | 0.01113  |
| 3.6   | 100    | 106.4605 | 39504 | 32 | 0.02693  | 0.002012 | 0.01071  |
| 37.5  | 100    | 16.7864  | 5187  | 13 | 2.065076 | 0.002012 | 0.01034  |
| 11    | 100    | 56.444   | 20659 | 26 | 0.090824 | 0.002012 | 0.01029  |
| 10.1  | 100    | 64.1294  | 23570 | 40 | 0.003338 | 0.002012 | 0.0111   |
| 0     | 100    | 124.0161 | 50936 | 23 | 0.17033  | 0.002012 | 0.01126  |
| 8.8   | 100    | 46.0009  | 18033 | 32 | 0.028961 | 0.002012 | 0.01054  |
| 18.6  | 100    | 84.1778  | 30175 | 29 | 0.057097 | 0.002012 | 0.01123  |

|       |        |          |       |    |          |          |         |
|-------|--------|----------|-------|----|----------|----------|---------|
| 2     | 100    | 97.8668  | 37041 | 15 | 1.21352  | 0.002012 | 0.01034 |
| 3.4   | 100    | 35.1164  | 10806 | 24 | 0.090363 | 0.002012 | 0.01094 |
| 8.8   | 100    | 76.7536  | 28612 | 23 | 0.183721 | 0.002012 | 0.01128 |
| 0.5   | 100    | 124.8498 | 46544 | 44 | 0.001503 | 0.002012 | 0.01123 |
| 0     | 100    | 135.1478 | 50133 | 22 | 0.033264 | 0.002012 | 0.01093 |
| 12.8  | 100    | 118.3088 | 43273 | 26 | 0.109407 | 0.002012 | 0.01036 |
| 1.4   | 100    | 128.0231 | 47111 | 35 | 0.011836 | 0.002079 | 0.01197 |
| 59.7  | 100    | 79.5862  | 28284 | 42 | 0.000806 | 0.002079 | 0.01234 |
| 21.4  | 100    | 54.2901  | 17885 | 18 | 0.432792 | 0.002079 | 0.01133 |
| 0.3   | 100    | 132.078  | 48695 | 29 | 0.024216 | 0.002079 | 0.01199 |
| 2.3   | 100    | 134.2654 | 49544 | 28 | 0.057667 | 0.002079 | 0.01234 |
| 2.5   | 100    | 120.1245 | 45292 | 19 | 0.522941 | 0.002079 | 0.01162 |
| 0.6   | 100    | 139.8754 | 57174 | 17 | 0.780116 | 0.002079 | 0.01141 |
| 48.9  | 100    | 30.4748  | 10198 | 23 | 0.156153 | 0.002079 | 0.01195 |
| 19.8  | 100    | 45.3418  | 16194 | 36 | 0.010476 | 0.002079 | 0.01196 |
| 168.7 | 100    | 55.8851  | 18402 | 46 | 0.00026  | 0.002079 | 0.0122  |
| 34.8  | 100    | 55.0453  | 21944 | 32 | 0.023091 | 0.002079 | 0.01206 |
| 24.2  | 100    | 44.1884  | 15742 | 12 | 2.871624 | 0.002079 | 0.01224 |
| 12.1  | 100    | 33.3155  | 12677 | 49 | 0.000623 | 0.002079 | 0.01151 |
| 119.4 | 12.678 | 79.2525  | 29399 | 43 | 0.00218  | 0.002079 | 0.01201 |
| 43.2  | 100    | 55.6976  | 19860 | 41 | 0.00085  | 0.002079 | 0.01169 |
| 128.4 | 100    | 33.4464  | 11853 | 47 | 0.000294 | 0.002079 | 0.01152 |
| 23.3  | 100    | 74.491   | 26069 | 15 | 1.3682   | 0.002177 | 0.01237 |
| 144.3 | 4.787  | 72.7583  | 26732 | 46 | 0.000865 | 0.002257 | 0.0129  |
| 1.1   | 100    | 92.7485  | 35444 | 41 | 0.001123 | 0.002257 | 0.01257 |
| 5.4   | 100    | 69.6716  | 24055 | 22 | 0.068011 | 0.002257 | 0.01259 |
| 17.7  | 100    | 55.4959  | 19781 | 19 | 0.382117 | 0.002257 | 0.01275 |
| 9.1   | 100    | 37.6451  | 11683 | 35 | 0.010606 | 0.002257 | 0.01252 |
| 83.6  | 100    | 25.0562  | 7433  | 28 | 0.057596 | 0.002257 | 0.01253 |
| 116.3 | 32.245 | 23.2648  | 6851  | 54 | 0.000156 | 0.002257 | 0.01295 |
| 29.6  | 22.822 | 80.9161  | 28858 | 15 | 1.00304  | 0.002315 | 0.01343 |
| 220.9 | 68.232 | 65.4192  | 22309 | 18 | 0.493157 | 0.002315 | 0.01312 |
| 1.8   | 100    | 91.236   | 37318 | 16 | 1.052109 | 0.002315 | 0.01418 |
| 1.3   | 100    | 73.1546  | 27105 | 42 | 0.001799 | 0.002315 | 0.01375 |
| 2.6   | 100    | 89.3069  | 36524 | 23 | 0.264582 | 0.002315 | 0.01376 |
| 16.4  | 100    | 78.2373  | 29001 | 36 | 0.010651 | 0.002315 | 0.01367 |
| 60.9  | 100    | 34.3221  | 11917 | 40 | 0.003187 | 0.002315 | 0.01355 |
| 5.1   | 100    | 78.2635  | 31872 | 16 | 1.084272 | 0.002315 | 0.01414 |
| 25.6  | 100    | 32.5437  | 10973 | 19 | 0.160062 | 0.002315 | 0.01392 |
| 8.1   | 100    | 80.9154  | 28119 | 27 | 0.087695 | 0.002315 | 0.01393 |
| 3.2   | 100    | 80.2237  | 27837 | 40 | 0.003836 | 0.002315 | 0.01297 |
| 0.3   | 100    | 137.4785 | 51571 | 21 | 0.078131 | 0.002315 | 0.01347 |
| 166.1 | 6.548  | 73.3186  | 25111 | 30 | 0.028734 | 0.002315 | 0.01388 |
| 70.7  | 100    | 46.8948  | 16320 | 19 | 0.48161  | 0.002315 | 0.01314 |
| 43.9  | 100    | 49.6545  | 17416 | 18 | 0.609131 | 0.002315 | 0.01302 |
| 2.4   | 100    | 92.0116  | 32577 | 32 | 0.02747  | 0.002315 | 0.01308 |
| 29.7  | 100    | 72.8149  | 24903 | 32 | 0.020295 | 0.002315 | 0.01319 |
| 14.8  | 100    | 51.0219  | 16654 | 8  | 2.524563 | 0.002315 | 0.01306 |
| 24.7  | 100    | 73.3558  | 26989 | 28 | 0.046179 | 0.002315 | 0.01303 |
| 178.4 | 12.834 | 94.1769  | 35483 | 33 | 0.01177  | 0.002376 | 0.0143  |
| 10.1  | 100    | 47.436   | 16581 | 35 | 0.007891 | 0.002376 | 0.01463 |
| 9.1   | 100    | 63.7428  | 23100 | 41 | 0.000963 | 0.002376 | 0.01442 |

|       |       |          |       |    |          |          |         |
|-------|-------|----------|-------|----|----------|----------|---------|
| 67.4  | 100   | 79.7589  | 29594 | 43 | 0.002265 | 0.002376 | 0.01541 |
| 10    | 100   | 74.8155  | 28052 | 40 | 0.00223  | 0.002376 | 0.01476 |
| 16.5  | 100   | 42.241   | 16403 | 45 | 0.000592 | 0.002376 | 0.01468 |
| 21.1  | 100   | 50.9876  | 17961 | 45 | 0.000883 | 0.002376 | 0.01425 |
| 0     | 100   | 123.1299 | 45232 | 26 | 0.104314 | 0.002376 | 0.01485 |
| 118.7 | 100   | 25.2027  | 9350  | 49 | 0.000452 | 0.002376 | 0.0154  |
| 2.2   | 100   | 125.2472 | 47522 | 29 | 0.062293 | 0.002376 | 0.01494 |
| 20.2  | 100   | 137.5319 | 53833 | 14 | 1.327416 | 0.002376 | 0.01505 |
| 51.5  | 100   | 14.6376  | 4192  | 23 | 0.211201 | 0.002376 | 0.01481 |
| 34.3  | 100   | 50.9101  | 16609 | 14 | 1.052692 | 0.002543 | 0.01564 |
| 181.6 | 87.78 | 56.8902  | 18789 | 50 | 0.000118 | 0.002543 | 0.01605 |
| 24.1  | 100   | 51.1161  | 18557 | 31 | 0.032057 | 0.002543 | 0.01565 |
| 16.6  | 100   | 41.9528  | 13194 | 13 | 2.613691 | 0.002543 | 0.01593 |
| 30.5  | 100   | 142.1429 | 49374 | 21 | 0.270243 | 0.002543 | 0.01592 |
| 9.6   | 100   | 67.2916  | 24994 | 40 | 0.004312 | 0.002543 | 0.01615 |
| 0.4   | 100   | 135.268  | 49939 | 24 | 0.019097 | 0.002543 | 0.01561 |
| 0     | 100   | 113.3386 | 46540 | 20 | 0.298546 | 0.002543 | 0.01607 |
| 16.7  | 100   | 84.7194  | 31982 | 26 | 0.064622 | 0.002543 | 0.01606 |
| 9.2   | 100   | 95.5971  | 36091 | 22 | 0.122874 | 0.002543 | 0.01549 |
| 1.1   | 100   | 123.9513 | 48150 | 21 | 0.34107  | 0.002543 | 0.0157  |
| 27.5  | 100   | 45.4992  | 14500 | 23 | 0.139961 | 0.002543 | 0.01603 |
| 1.5   | 100   | 122.5119 | 47559 | 22 | 0.23241  | 0.002719 | 0.01658 |
| 21.1  | 100   | 29.9753  | 10013 | 24 | 0.114633 | 0.002719 | 0.01657 |
| 7.3   | 100   | 90.3329  | 32739 | 29 | 0.050216 | 0.002719 | 0.01667 |
| 50.2  | 100   | 56.8565  | 22713 | 57 | 8.85E-05 | 0.002719 | 0.0167  |
| 13.3  | 100   | 39.0263  | 13415 | 31 | 0.016606 | 0.002719 | 0.01672 |
| 8.4   | 100   | 48.5412  | 15673 | 21 | 0.380159 | 0.002719 | 0.01644 |
| 28.9  | 100   | 18.4358  | 5987  | 18 | 0.484865 | 0.002719 | 0.01642 |
| 0     | 100   | 111.8616 | 41141 | 22 | 0.125079 | 0.002777 | 0.01802 |
| 0     | 100   | 118.4794 | 43455 | 30 | 0.010457 | 0.002777 | 0.01718 |
| 8     | 100   | 72.0109  | 26891 | 44 | 0.001751 | 0.002777 | 0.01723 |
| 3.8   | 100   | 71.0039  | 26482 | 44 | 0.001969 | 0.002777 | 0.0169  |
| 0.9   | 100   | 125.5237 | 51523 | 11 | 2.68328  | 0.002777 | 0.01816 |
| 39.5  | 100   | 28.1539  | 9780  | 40 | 0.002494 | 0.002777 | 0.01702 |
| 234.8 | 2.382 | 55.2887  | 22041 | 46 | 0.000548 | 0.002777 | 0.01809 |
| 42.4  | 100   | 32.4715  | 10945 | 44 | 0.000617 | 0.002777 | 0.01728 |
| 1.6   | 100   | 107.5925 | 39968 | 27 | 0.069156 | 0.002777 | 0.01751 |
| 0     | 100   | 119.284  | 45512 | 23 | 0.053135 | 0.002777 | 0.01788 |
| 2.4   | 100   | 99.0623  | 36375 | 17 | 0.786053 | 0.002777 | 0.01785 |
| 28.7  | 100   | 49.5712  | 16094 | 26 | 0.067615 | 0.002777 | 0.01724 |
| 39.5  | 100   | 28.1539  | 9780  | 40 | 0.002494 | 0.002777 | 0.01702 |
| 111   | 100   | 55.1846  | 19661 | 44 | 0.000439 | 0.002777 | 0.01736 |
| 13.8  | 100   | 66.2041  | 22339 | 39 | 0.005254 | 0.002777 | 0.01735 |
| 80.9  | 6.673 | 59.8929  | 21521 | 49 | 0.000156 | 0.002777 | 0.0182  |
| 76.3  | 100   | 32.3113  | 11114 | 42 | 0.001943 | 0.002777 | 0.01704 |
| 2.2   | 100   | 70.8327  | 24144 | 41 | 0.003622 | 0.002843 | 0.01917 |
| 27.3  | 100   | 43.4703  | 13751 | 18 | 0.243409 | 0.002843 | 0.01925 |
| 39.8  | 100   | 51.4987  | 18173 | 32 | 0.019137 | 0.002843 | 0.0193  |
| 0.9   | 100   | 129.8221 | 50708 | 18 | 0.586554 | 0.002843 | 0.01917 |
| 3.3   | 100   | 120.6276 | 45521 | 33 | 0.022568 | 0.002843 | 0.01895 |
| 13.6  | 100   | 60.4063  | 20102 | 29 | 0.041386 | 0.002843 | 0.0192  |
| 37.8  | 100   | 24.9276  | 7469  | 32 | 0.003658 | 0.002843 | 0.01844 |

|       |        |          |       |    |          |          |         |
|-------|--------|----------|-------|----|----------|----------|---------|
| 1.9   | 100    | 81.0716  | 33019 | 34 | 0.01454  | 0.002931 | 0.01946 |
| 1.5   | 100    | 140.395  | 54524 | 16 | 0.986067 | 0.002931 | 0.01948 |
| 50.8  | 100    | 74.4229  | 25582 | 34 | 0.013515 | 0.002931 | 0.01936 |
| 0     | 100    | 116.3284 | 44399 | 36 | 0.00244  | 0.002931 | 0.01939 |
| 16.6  | 100    | 23.9692  | 8212  | 19 | 0.267028 | 0.002931 | 0.01941 |
| 1.6   | 100    | 119.6207 | 45081 | 35 | 0.006018 | 0.002931 | 0.0195  |
| 13.8  | 100    | 32.3648  | 11436 | 23 | 0.203656 | 0.003096 | 0.02018 |
| 14.9  | 100    | 139.6386 | 53725 | 18 | 0.50026  | 0.003096 | 0.01995 |
| 92.4  | 49.409 | 32.8128  | 11320 | 49 | 0.000478 | 0.003096 | 0.01996 |
| 170.7 | 0.62   | 73.0704  | 25010 | 52 | 0.000181 | 0.003096 | 0.01966 |
| 36.4  | 100    | 56.3345  | 18574 | 49 | 0.000503 | 0.003096 | 0.02037 |
| 98.3  | 1.919  | 109.7873 | 42149 | 41 | 0.003444 | 0.003096 | 0.01976 |
| 16.5  | 100    | 18.8018  | 6522  | 35 | 0.008563 | 0.003096 | 0.02033 |
| 365.7 | 10.558 | 13.2859  | 3717  | 20 | 0.20513  | 0.003178 | 0.0204  |
| 0     | 100    | 126.3135 | 46489 | 22 | 0.1338   | 0.003178 | 0.0205  |
| 13.4  | 100    | 60.3106  | 22098 | 35 | 0.008    | 0.003178 | 0.02071 |
| 10.8  | 100    | 43.366   | 15523 | 45 | 0.000623 | 0.003178 | 0.02065 |
| 104.6 | 100    | 58.4265  | 19383 | 37 | 0.001974 | 0.003178 | 0.02079 |
| 114   | 100    | 15.702   | 4935  | 21 | 0.299267 | 0.003178 | 0.02068 |
| 30.3  | 100    | 58.993   | 19592 | 32 | 0.006568 | 0.003178 | 0.02045 |
| 0.9   | 100    | 127.5214 | 46932 | 21 | 0.276101 | 0.003254 | 0.02093 |
| 22.8  | 100    | 47.6385  | 17089 | 13 | 1.909855 | 0.003254 | 0.02132 |
| 7.2   | 100    | 49.1677  | 17688 | 28 | 0.068186 | 0.003344 | 0.02156 |
| 7.2   | 100    | 87.5419  | 32759 | 18 | 0.764687 | 0.00337  | 0.02249 |
| 19.3  | 100    | 46.8759  | 16886 | 59 | 1.92E-05 | 0.00337  | 0.0237  |
| 34.6  | 100    | 45.8669  | 16492 | 46 | 0.000387 | 0.00337  | 0.02165 |
| 0.3   | 100    | 118.1025 | 43186 | 22 | 0.120875 | 0.00337  | 0.02287 |
| 3.4   | 100    | 60.2989  | 20062 | 39 | 0.003593 | 0.00337  | 0.02161 |
| 15.8  | 100    | 63.6208  | 23369 | 30 | 0.031252 | 0.00337  | 0.02253 |
| 10.9  | 100    | 112.6773 | 40891 | 21 | 0.261859 | 0.00337  | 0.02304 |
| 0     | 100    | 127.4408 | 49818 | 17 | 0.778143 | 0.00337  | 0.02194 |
| 142.8 | 100    | 20.0814  | 7122  | 43 | 0.001361 | 0.00337  | 0.02208 |
| 2.3   | 100    | 96.4612  | 39566 | 22 | 0.292534 | 0.00337  | 0.02263 |
| 19.6  | 80.52  | 43.325   | 13697 | 22 | 0.102056 | 0.00337  | 0.02253 |
| 181.5 | 100    | 56.1778  | 18519 | 31 | 0.035361 | 0.00337  | 0.02279 |
| 0.8   | 100    | 117.9408 | 45020 | 12 | 0.198225 | 0.00337  | 0.0222  |
| 3.7   | 100    | 33.3512  | 10199 | 44 | 0.001837 | 0.00337  | 0.02228 |
| 0.3   | 100    | 129.1225 | 47552 | 22 | 0.261171 | 0.00337  | 0.02402 |
| 2.6   | 100    | 98.2884  | 36848 | 20 | 0.371405 | 0.00337  | 0.02409 |
| 5.8   | 100    | 100.4162 | 37724 | 5  | 12.38757 | 0.00337  | 0.02404 |
| 0.4   | 100    | 76.602   | 28287 | 24 | 0.137741 | 0.00337  | 0.02391 |
| 8.5   | 100    | 114.3263 | 41594 | 23 | 0.120075 | 0.00337  | 0.02322 |
| 212.9 | 100    | 47.4046  | 16531 | 15 | 1.185488 | 0.00337  | 0.02228 |
| 7.7   | 100    | 32.0139  | 10769 | 32 | 0.010955 | 0.00337  | 0.02402 |
| 0     | 100    | 136.7845 | 51352 | 24 | 0.042602 | 0.00337  | 0.02352 |
| 23.6  | 100    | 31.8102  | 10910 | 34 | 0.015143 | 0.00337  | 0.02187 |
| 0.6   | 100    | 13.2533  | 3582  | 48 | 0.000354 | 0.00337  | 0.02255 |
| 11.1  | 100    | 20.1382  | 5924  | 38 | 0.004696 | 0.00337  | 0.02294 |
| 6.2   | 100    | 37.7866  | 11733 | 35 | 0.009923 | 0.00337  | 0.02241 |
| 13.8  | 100    | 59.8075  | 20046 | 13 | 0.682482 | 0.003533 | 0.02464 |
| 0.9   | 100    | 136.9032 | 52483 | 22 | 0.241573 | 0.003533 | 0.02466 |
| 10.3  | 100    | 53.907   | 19580 | 30 | 0.042689 | 0.003533 | 0.02474 |

|       |        |          |       |    |          |          |         |
|-------|--------|----------|-------|----|----------|----------|---------|
| 0     | 100    | 125.5095 | 46776 | 21 | 0.254214 | 0.003533 | 0.0249  |
| 150.6 | 5.139  | 32.5622  | 11515 | 50 | 0.000159 | 0.003674 | 0.02648 |
| 27    | 100    | 81.671   | 29168 | 23 | 0.176714 | 0.003674 | 0.02646 |
| 1.3   | 100    | 109.1022 | 40579 | 21 | 0.283035 | 0.003674 | 0.02528 |
| 85.9  | 96.924 | 86.4327  | 31132 | 57 | 3.83E-05 | 0.003674 | 0.02578 |
| 1.7   | 100    | 91.2303  | 37315 | 26 | 0.10603  | 0.003674 | 0.02605 |
| 251.9 | 100    | 46.7062  | 16253 | 33 | 0.00718  | 0.003674 | 0.02512 |
| 1.8   | 100    | 70.1019  | 25801 | 26 | 0.021617 | 0.003674 | 0.0262  |
| 40.7  | 100    | 16.9794  | 5006  | 51 | 0.000326 | 0.003674 | 0.02629 |
| 2.2   | 100    | 105.8706 | 38053 | 25 | 0.082116 | 0.003674 | 0.02592 |
| 19.7  | 100    | 27.8792  | 8419  | 33 | 0.013981 | 0.003674 | 0.02563 |
| 16.8  | 100    | 47.633   | 16658 | 26 | 0.070328 | 0.003674 | 0.02576 |
| 19.7  | 100    | 27.8792  | 8419  | 33 | 0.013981 | 0.003674 | 0.02563 |
| 172   | 1.992  | 105.0538 | 38919 | 50 | 0.000185 | 0.003736 | 0.02739 |
| 7.2   | 100    | 65.8721  | 26567 | 41 | 0.003681 | 0.003736 | 0.02746 |
| 7.7   | 100    | 16.8532  | 4690  | 31 | 0.016764 | 0.003736 | 0.02665 |
| 2.1   | 100    | 98.0509  | 35934 | 16 | 0.991983 | 0.003736 | 0.02765 |
| 19.9  | 100    | 57.3923  | 22950 | 51 | 0.000392 | 0.003736 | 0.02726 |
| 12.2  | 100    | 60.8194  | 20261 | 36 | 0.007394 | 0.003736 | 0.02669 |
| 18.5  | 100    | 50.1781  | 16328 | 28 | 0.055634 | 0.003736 | 0.0266  |
| 172   | 0.457  | 23.0461  | 6781  | 29 | 0.044503 | 0.003736 | 0.02681 |
| 37.6  | 7.976  | 55.3609  | 22074 | 38 | 0.003929 | 0.003736 | 0.02692 |
| 47.8  | 100    | 53.658   | 19548 | 26 | 0.090504 | 0.003736 | 0.02738 |
| 3.5   | 100    | 139.6883 | 54818 | 16 | 1.14862  | 0.003736 | 0.0277  |
| 0.3   | 100    | 118.983  | 43618 | 25 | 0.036595 | 0.003736 | 0.02781 |
| 0.5   | 100    | 113.8442 | 46761 | 22 | 0.175939 | 0.003892 | 0.0282  |
| 3.8   | 100    | 35.349   | 10886 | 20 | 0.341073 | 0.003892 | 0.02821 |
| 96    | 100    | 15.5854  | 4868  | 15 | 1.258245 | 0.003967 | 0.02883 |
| 41.5  | 100    | 50.573   | 17830 | 25 | 0.125702 | 0.003967 | 0.02902 |
| 4.3   | 100    | 90.7052  | 34106 | 16 | 1.012688 | 0.003967 | 0.02903 |
| 44    | 100    | 54.3837  | 17919 | 42 | 0.002695 | 0.003967 | 0.0289  |
| 26.7  | 100    | 90.8307  | 34652 | 25 | 0.087289 | 0.004049 | 0.02913 |
| 4     | 100    | 34.3429  | 10536 | 26 | 0.095466 | 0.004124 | 0.02922 |
| 3.6   | 100    | 93.1386  | 34804 | 18 | 0.656354 | 0.004124 | 0.0294  |
| 12.6  | 100    | 31.4391  | 10556 | 29 | 0.023791 | 0.004192 | 0.03028 |
| 1.5   | 100    | 119.837  | 45705 | 29 | 0.027753 | 0.004192 | 0.03012 |
| 4.3   | 100    | 56.7736  | 18861 | 40 | 0.003534 | 0.004192 | 0.03029 |
| 18.4  | 100    | 20.2313  | 6733  | 30 | 0.028079 | 0.004266 | 0.03094 |
| 20.2  | 100    | 17.4365  | 5027  | 37 | 0.002658 | 0.004266 | 0.03075 |
| 2.2   | 100    | 105.808  | 38027 | 20 | 0.249036 | 0.004266 | 0.03087 |
| 20.2  | 100    | 17.4365  | 5027  | 37 | 0.002658 | 0.004266 | 0.03075 |
| 304.2 | 100    | 58.5029  | 20986 | 43 | 0.001872 | 0.004266 | 0.03078 |
| 4.5   | 100    | 116.4221 | 43694 | 28 | 0.076726 | 0.004424 | 0.03169 |
| 7     | 100    | 34.7075  | 13255 | 24 | 0.160773 | 0.004424 | 0.03176 |
| 0     | 100    | 110.8827 | 40175 | 26 | 0.088843 | 0.004643 | 0.0336  |
| 184.3 | 0.622  | 78.7479  | 29200 | 48 | 0.000748 | 0.004643 | 0.03314 |
| 0     | 100    | 127.5471 | 52350 | 8  | 5.347198 | 0.004643 | 0.0328  |
| 7.5   | 100    | 96.1616  | 35144 | 21 | 0.247602 | 0.004643 | 0.03272 |
| 2.3   | 100    | 125.582  | 46224 | 16 | 0.897068 | 0.004803 | 0.03405 |
| 6.7   | 100    | 61.3262  | 22484 | 37 | 0.006258 | 0.004803 | 0.03418 |
| 2.7   | 100    | 82.8175  | 29638 | 11 | 2.47106  | 0.00496  | 0.0347  |
| 7.3   | 100    | 50.2999  | 18137 | 42 | 0.001092 | 0.00496  | 0.0343  |

|       |        |          |       |    |          |          |         |
|-------|--------|----------|-------|----|----------|----------|---------|
| 11.9  | 100    | 70.3343  | 25897 | 22 | 0.125017 | 0.00496  | 0.03466 |
| 10    | 100    | 50.2586  | 17703 | 24 | 0.199351 | 0.005031 | 0.03502 |
| 2.2   | 100    | 93.9355  | 35131 | 22 | 0.265732 | 0.005031 | 0.03524 |
| 0     | 100    | 104.5406 | 39939 | 24 | 0.112815 | 0.005196 | 0.0355  |
| 0     | 100    | 110.5637 | 42254 | 18 | 0.565797 | 0.005271 | 0.03611 |
| 2.1   | 100    | 71.6742  | 26755 | 28 | 0.014657 | 0.005271 | 0.03597 |
| 6.3   | 100    | 63.8746  | 25729 | 27 | 0.074295 | 0.005325 | 0.03654 |
| 1.9   | 100    | 119.0113 | 43546 | 20 | 0.357839 | 0.005325 | 0.03665 |
| 8.4   | 100    | 100.7056 | 37112 | 20 | 0.427379 | 0.005325 | 0.03721 |
| 3.1   | 100    | 110.123  | 40991 | 22 | 0.227874 | 0.005325 | 0.03658 |
| 7.3   | 100    | 72.3846  | 26573 | 32 | 0.016756 | 0.005325 | 0.03633 |
| 28.9  | 100    | 15.904   | 4374  | 39 | 0.001065 | 0.005325 | 0.03646 |
| 15.5  | 100    | 34.8296  | 12107 | 34 | 0.014326 | 0.005325 | 0.03648 |
| 20.6  | 100    | 56.5496  | 20647 | 38 | 0.004769 | 0.005325 | 0.03737 |
| 8.2   | 100    | 62.8738  | 22754 | 21 | 0.267189 | 0.005325 | 0.03746 |
| 7.8   | 100    | 77.8551  | 29332 | 25 | 0.106159 | 0.005325 | 0.0368  |
| 3.2   | 100    | 85.9135  | 30907 | 13 | 2.141892 | 0.005404 | 0.03765 |
| 6.3   | 100    | 96.606   | 39633 | 23 | 0.207576 | 0.005478 | 0.038   |
| 8.1   | 100    | 19.3158  | 5670  | 28 | 0.062228 | 0.005478 | 0.03791 |
| 13.6  | 100    | 71.8328  | 26331 | 25 | 0.104765 | 0.005478 | 0.03788 |
| 8.1   | 100    | 19.3158  | 5670  | 28 | 0.062515 | 0.005478 | 0.03801 |
| 20.6  | 100    | 49.4838  | 17350 | 17 | 1.004295 | 0.005556 | 0.03821 |
| 30.4  | 100    | 80.2623  | 29789 | 37 | 0.00856  | 0.005556 | 0.03814 |
| 41.4  | 65.949 | 60.23    | 22070 | 41 | 0.002168 | 0.005618 | 0.03884 |
| 0     | 100    | 138.9056 | 52024 | 21 | 0.085195 | 0.005618 | 0.03888 |
| 13.3  | 100    | 50.7852  | 16563 | 31 | 0.021044 | 0.005618 | 0.03905 |
| 34.7  | 100    | 61.067   | 20355 | 35 | 0.003254 | 0.005618 | 0.03871 |
| 50    | 100    | 28.3694  | 9137  | 16 | 1.033893 | 0.005618 | 0.03856 |
| 173.7 | 50.76  | 57.4923  | 20580 | 39 | 0.004585 | 0.005687 | 0.03986 |
| 1.7   | 100    | 121.3017 | 45818 | 33 | 0.009805 | 0.005687 | 0.03933 |
| 0.4   | 100    | 117.575  | 42961 | 25 | 0.068306 | 0.005687 | 0.03976 |
| 20    | 100    | 74.0907  | 27507 | 23 | 0.261358 | 0.00573  | 0.04007 |
| 4.6   | 100    | 60.9918  | 21984 | 27 | 0.025539 | 0.00573  | 0.04011 |
| 6.8   | 100    | 85.9667  | 30927 | 17 | 0.89183  | 0.00573  | 0.04011 |
| 7.9   | 100    | 106.1109 | 43592 | 7  | 8.35499  | 0.00573  | 0.0415  |
| 14.1  | 100    | 53.405   | 19387 | 25 | 0.166224 | 0.00573  | 0.04096 |
| 16.6  | 100    | 106.1939 | 39395 | 37 | 0.002693 | 0.00573  | 0.04043 |
| 91.3  | 100    | 21.9828  | 7951  | 35 | 0.011824 | 0.00573  | 0.04023 |
| 8     | 100    | 33.751   | 10393 | 32 | 0.028389 | 0.00573  | 0.04097 |
| 21.8  | 100    | 42.6804  | 15170 | 29 | 0.045725 | 0.005792 | 0.04163 |
| 26.5  | 100    | 34.3627  | 10597 | 35 | 0.00117  | 0.005792 | 0.04169 |
| 21.8  | 100    | 42.6804  | 15170 | 29 | 0.045725 | 0.005792 | 0.04163 |
| 46.3  | 100    | 23.8494  | 8165  | 27 | 0.0918   | 0.005792 | 0.04263 |
| 0     | 100    | 106.0852 | 41116 | 18 | 0.497593 | 0.005792 | 0.04192 |
| 1.4   | 100    | 135.046  | 51710 | 25 | 0.11471  | 0.005865 | 0.04311 |
| 92.4  | 100    | 45.3556  | 14441 | 41 | 0.001249 | 0.005943 | 0.0434  |
| 34.8  | 100    | 24.3532  | 8365  | 27 | 0.078761 | 0.005943 | 0.04345 |
| 0     | 100    | 122.353  | 45689 | 13 | 1.737192 | 0.00599  | 0.04496 |
| 8.8   | 100    | 28.4686  | 8592  | 23 | 0.061785 | 0.00599  | 0.04512 |
| 12.7  | 100    | 46.8437  | 15016 | 33 | 0.016396 | 0.00599  | 0.04448 |
| 65.1  | 100    | 71.6056  | 24855 | 34 | 0.009484 | 0.00599  | 0.04542 |
| 7.5   | 100    | 96.9633  | 35486 | 19 | 0.371488 | 0.00599  | 0.04468 |



|       |        |          |       |    |          |          |         |
|-------|--------|----------|-------|----|----------|----------|---------|
| 5.1   | 100    | 92.9326  | 32941 | 22 | 0.283036 | 0.006299 | 0.04616 |
| 29.2  | 100    | 54.4997  | 19389 | 19 | 0.382864 | 0.006371 | 0.04653 |
| 15.7  | 100    | 89.6031  | 31599 | 43 | 0.000798 | 0.006428 | 0.04798 |
| 7.6   | 100    | 117.652  | 42996 | 13 | 1.033848 | 0.006428 | 0.04753 |
| 11.3  | 100    | 48.0294  | 15444 | 26 | 0.062167 | 0.006428 | 0.04741 |
| 1.8   | 100    | 91.0278  | 33021 | 34 | 0.015011 | 0.006428 | 0.0478  |
| 11    | 100    | 83.6727  | 29968 | 23 | 0.198195 | 0.006428 | 0.04779 |
| 8.5   | 100    | 44.5796  | 15863 | 40 | 0.0022   | 0.006721 | 0.04916 |
| 0     | 100    | 110.0629 | 42071 | 20 | 0.357064 | 0.006795 | 0.04972 |
| 0.9   | 100    | 36.6577  | 11379 | 24 | 0.143712 | 0.006795 | 0.0498  |
| 20.6  | 100    | 64.7377  | 22022 | 31 | 0.029087 | 0.006795 | 0.0498  |
| 119   | 73.479 | 78.4337  | 27782 | 40 | 0.001462 | 0.006926 | 0.0501  |
| 13    | 100    | 46.3519  | 16601 | 31 | 0.034306 | 0.006926 | 0.05062 |
| 3     | 100    | 115.9258 | 42258 | 18 | 0.54306  | 0.006926 | 0.05056 |
| 20.5  | 100    | 52.7295  | 18696 | 45 | 0.000895 | 0.006926 | 0.05015 |
| 23.7  | 100    | 39.685   | 13868 | 25 | 0.123845 | 0.006926 | 0.05063 |
| 23.7  | 100    | 39.685   | 13868 | 25 | 0.123845 | 0.006926 | 0.05063 |
| 1.1   | 100    | 112.8527 | 46341 | 11 | 2.852406 | 0.006926 | 0.05068 |
| 1     | 100    | 96.9631  | 39773 | 22 | 0.313456 | 0.006991 | 0.05116 |
| 75.4  | 100    | 25.5576  | 7594  | 28 | 0.064166 | 0.006991 | 0.05119 |
| 1.5   | 100    | 101.5519 | 37461 | 20 | 0.346919 | 0.006991 | 0.05127 |
| 101.2 | 100    | 73.9162  | 25371 | 31 | 0.027407 | 0.006991 | 0.05113 |
| 4.8   | 100    | 87.7152  | 33462 | 25 | 0.048288 | 0.007057 | 0.05207 |
| 40    | 100    | 16.7215  | 5155  | 17 | 0.897106 | 0.007057 | 0.05225 |
| 2.1   | 100    | 40.5606  | 13979 | 17 | 0.85841  | 0.00728  | 0.05321 |
| 199   | 100    | 59.0109  | 21207 | 36 | 0.009337 | 0.007423 | 0.05404 |
| 1.1   | 100    | 136.6208 | 50493 | 19 | 0.488042 | 0.007423 | 0.05356 |
| 12.8  | 100    | 84.3272  | 30242 | 27 | 0.072584 | 0.007499 | 0.05414 |
| 0     | 100    | 132.8834 | 50050 | 22 | 0.069984 | 0.007636 | 0.05526 |
| 38.5  | 100    | 15.8989  | 4487  | 13 | 1.909148 | 0.007636 | 0.05479 |
| 7.8   | 100    | 27.7523  | 8376  | 18 | 0.180185 | 0.007714 | 0.05545 |
| 12.1  | 100    | 53.7193  | 19072 | 36 | 0.006714 | 0.007836 | 0.05687 |
| 1.3   | 100    | 132.8472 | 51869 | 23 | 0.211758 | 0.007836 | 0.05607 |
| 7.2   | 100    | 18.9913  | 6613  | 33 | 0.020242 | 0.007836 | 0.05626 |
| 44.9  | 28.562 | 30.3921  | 10165 | 29 | 0.038615 | 0.007903 | 0.05751 |
| 1.9   | 100    | 133.4236 | 49224 | 23 | 0.231734 | 0.007903 | 0.05735 |
| 8.6   | 100    | 32.6314  | 12394 | 13 | 1.109469 | 0.007969 | 0.05832 |
| 35.3  | 100    | 56.3413  | 18577 | 22 | 0.26463  | 0.008034 | 0.05872 |
| 0     | 100    | 127.6431 | 48334 | 16 | 0.247408 | 0.008034 | 0.05911 |
| 11    | 100    | 52.1764  | 18460 | 31 | 0.0207   | 0.00822  | 0.06101 |
| 123.3 | 100    | 59.7296  | 21905 | 37 | 0.00676  | 0.00822  | 0.06141 |
| 15.7  | 100    | 40.5865  | 15700 | 27 | 0.071465 | 0.00822  | 0.06137 |
| 0.5   | 100    | 138.3625 | 56590 | 8  | 6.446955 | 0.00822  | 0.06206 |
| 14.1  | 100    | 111.2171 | 40306 | 22 | 0.322749 | 0.00822  | 0.06078 |
| 9.8   | 100    | 33.5571  | 11894 | 9  | 2.5672   | 0.00822  | 0.06209 |
| 37.4  | 100    | 70.894   | 24561 | 24 | 0.121954 | 0.00822  | 0.06116 |
| 297.3 | 84.692 | 32.3529  | 11132 | 17 | 0.682523 | 0.008293 | 0.06229 |
| 10.1  | 100    | 117.491  | 44143 | 10 | 4.713109 | 0.0085   | 0.06356 |
| 37.7  | 100    | 15.8105  | 4513  | 35 | 0.002532 | 0.0085   | 0.06382 |
| 3.7   | 100    | 89.8932  | 33554 | 18 | 0.733516 | 0.008559 | 0.06463 |
| 14.3  | 100    | 44.8359  | 15997 | 30 | 0.041626 | 0.008559 | 0.06472 |
| 1     | 100    | 69.617   | 25728 | 30 | 0.034604 | 0.00861  | 0.06522 |

|       |        |          |       |    |          |          |          |
|-------|--------|----------|-------|----|----------|----------|----------|
| 22.6  | 100    | 30.2589  | 9176  | 19 | 0.068047 | 0.00861  | 0.06514  |
| 22.6  | 100    | 30.2589  | 9176  | 19 | 0.068047 | 0.00861  | 0.06514  |
| 2.2   | 100    | 118.9578 | 46001 | 13 | 0.946914 | 0.00861  | 0.06524  |
| 0     | 100    | 112.7135 | 40906 | 20 | 0.32801  | 0.00861  | 0.0654   |
| 14.6  | 100    | 75.3181  | 28272 | 27 | 0.04618  | 0.00861  | 0.06564  |
| 2.9   | 100    | 100.8447 | 37171 | 13 | 1.953284 | 0.00861  | 0.06535  |
| 166.2 | 1.847  | 54.6804  | 19463 | 50 | 0.00013  | 0.008746 | 0.06698  |
| 0     | 100    | 80.5692  | 32817 | 17 | 0.700472 | 0.008962 | 0.06749  |
| 4     | 100    | 106.2291 | 39412 | 22 | 0.264752 | 0.008962 | 0.06752  |
| 44.3  | 100    | 14.1537  | 4009  | 37 | 0.003143 | 0.008962 | 0.06776  |
| 6.3   | 100    | 17.5263  | 5063  | 16 | 1.011689 | 0.008997 | 0.06928  |
| 0     | 100    | 133.665  | 50315 | 19 | 0.125723 | 0.008997 | 0.0693   |
| 19    | 100    | 84.6812  | 30387 | 16 | 1.045331 | 0.008997 | 0.06863  |
| 2.8   | 85.085 | 96.1849  | 35155 | 21 | 0.247235 | 0.009141 | 0.0706   |
| 1.9   | 100    | 128.2864 | 49956 | 17 | 0.82887  | 0.009498 | 0.07221  |
| 28.4  | 100    | 71.0051  | 24609 | 19 | 0.340101 | 0.009498 | 0.07185  |
| 1.5   | 100    | 38.7539  | 14942 | 19 | 0.135879 | 0.009514 | 0.07612  |
| 31.2  | 100    | 55.9128  | 20449 | 21 | 0.220139 | 0.009514 | 0.07602  |
| 6.5   | 100    | 101.045  | 37251 | 20 | 0.335861 | 0.009514 | 0.07283  |
| 4.9   | 100    | 40.7072  | 14388 | 35 | 0.010941 | 0.009514 | 0.07645  |
| 24.6  | 100    | 24.4269  | 7309  | 31 | 0.003992 | 0.009514 | 0.07387  |
| 23.2  | 100    | 33.0708  | 10108 | 23 | 0.018332 | 0.009514 | 0.07624  |
| 14.2  | 100    | 41.1193  | 15913 | 21 | 0.28396  | 0.009655 | 0.07682  |
| 0     | 100    | 124.712  | 51210 | 27 | 0.08328  | 0.00971  | 0.0773   |
| 2.3   | 100    | 139.872  | 51966 | 8  | 6.050148 | 0.00971  | 0.07801  |
| 2.9   | 100    | 70.1098  | 25805 | 12 | 1.230185 | 0.00971  | 0.07752  |
| 197.5 | 2.742  | 48.6127  | 17004 | 50 | 0.000307 | 0.009764 | 0.07857  |
| 129.2 | 7.926  | 32.9425  | 11668 | 45 | 0.000441 | 0.009764 | 0.07867  |
| 6.9   | 100    | 18.5296  | 5419  | 20 | 0.328316 | 0.009818 | 0.0792   |
| 32.4  | 100    | 61.039   | 22051 | 35 | 0.011457 | 0.009858 | 0.07989  |
| 16.9  | 100    | 20.1533  | 6320  | 17 | 0.5841   | 0.009858 | 0.08134  |
| 0.8   | 100    | 130.3527 | 49717 | 14 | 1.494066 | 0.009858 | 0.08029  |
| 12.8  | 100    | 33.0521  | 11244 | 29 | 0.042607 | 0.009858 | 0.08119  |
| 1.9   | 100    | 53.589   | 17608 | 11 | 3.769175 | 0.009858 | 0.08112  |
| 0     | 100    | 66.8757  | 24377 | 26 | 0.092124 | 0.009858 | 0.08054  |
| 16.2  | 100    | 50.1438  | 19817 | 18 | 0.47016  | 0.009914 | 0.08222  |
| 7.3   | 100    | 46.4628  | 16630 | 34 | 0.007963 | 0.009914 | 0.08205  |
| 8.2   | 100    | 86.5217  | 30321 | 36 | 0.00807  | 0.009914 | 0.08228  |
| 21.1  | 100    | 51.0316  | 16658 | 67 | 5.5E-06  | 0        | 1.06E-05 |
| 64    | 27.299 | 88.9439  | 33188 | 44 | 0.000816 | 0        | 0.000304 |
| 0     | 100    | 88.3398  | 32953 | 68 | 4.37E-06 | 0        | 2.39E-05 |
| 35.3  | 100    | 50.3673  | 16402 | 38 | 0.005746 | 0        | 0.000199 |
| 9.9   | 100    | 50.5305  | 16467 | 58 | 4.43E-05 | 0        | 2.09E-05 |
| 2.9   | 100    | 84.4676  | 31399 | 46 | 0.000942 | 0        | 0.000128 |
| 17.4  | 100    | 84.437   | 31386 | 55 | 9.91E-05 | 0        | 0.000154 |
| 40.9  | 5.976  | 83.9667  | 31214 | 43 | 0.001904 | 0        | 0.000223 |
| 61.9  | 2.531  | 83.9354  | 31200 | 58 | 6.2E-05  | 0        | 0.000227 |
| 4.2   | 100    | 83.4659  | 31018 | 45 | 0.001061 | 0        | 0.000141 |
| 25.3  | 100    | 87.1216  | 32452 | 55 | 0.000137 | 0        | 0.000325 |
| 78    | 5.497  | 93.5917  | 34994 | 66 | 9.99E-06 | 0        | 0.000209 |
| 5.7   | 100    | 93.5801  | 34990 | 62 | 1.27E-05 | 0        | 0.000607 |
| 35.6  | 29.991 | 93.2794  | 34864 | 50 | 0.000317 | 0        | 0.000116 |

|       |        |          |       |    |          |   |          |
|-------|--------|----------|-------|----|----------|---|----------|
| 54.8  | 8.559  | 93.271   | 34860 | 60 | 3.19E-05 | 0 | 6.82E-05 |
| 64.2  | 10.912 | 93.0442  | 34764 | 60 | 3.66E-05 | 0 | 3.78E-05 |
| 2.7   | 100    | 98.0324  | 36752 | 39 | 0.003972 | 0 | 0.000172 |
| 19.4  | 100    | 98.5839  | 36960 | 28 | 0.060881 | 0 | 4E-05    |
| 60.3  | 100    | 68.4309  | 25242 | 46 | 0.00088  | 0 | 0.000374 |
| 21.2  | 100    | 69.0507  | 25504 | 32 | 0.016374 | 0 | 0.000374 |
| 19.4  | 100    | 56.6114  | 18794 | 51 | 0.000396 | 0 | 1.02E-05 |
| 68    | 99.298 | 63.1595  | 23196 | 57 | 6.46E-05 | 0 | 0.000878 |
| 109.8 | 17.469 | 62.1949  | 22823 | 46 | 0.000988 | 0 | 0.000613 |
| 100.6 | 9.564  | 62.1499  | 22807 | 69 | 5.1E-06  | 0 | 4.04E-05 |
| 56.8  | 100    | 57.1144  | 19007 | 70 | 4.4E-06  | 0 | 2.58E-09 |
| 11    | 100    | 57.1247  | 19012 | 72 | 2.86E-06 | 0 | 3.31E-08 |
| 98.6  | 100    | 53.8736  | 17717 | 50 | 0.000314 | 0 | 0.000135 |
| 32.2  | 100    | 81.7959  | 30396 | 54 | 9.94E-05 | 0 | 0.001013 |
| 1.3   | 100    | 81.6251  | 30330 | 55 | 0.0001   | 0 | 0.000208 |
| 14.8  | 100    | 72.6702  | 26929 | 48 | 0.000443 | 0 | 0.000189 |
| 33.6  | 100    | 54.0553  | 17789 | 49 | 0.000452 | 0 | 0.000423 |
| 45.7  | 22.141 | 74.5939  | 27649 | 64 | 1.53E-05 | 0 | 7.64E-07 |
| 58    | 8.685  | 74.5798  | 27643 | 56 | 0.000101 | 0 | 5.62E-05 |
| 10    | 100    | 54.2977  | 17888 | 48 | 0.000623 | 0 | 0.000471 |
| 12.6  | 100    | 38.257   | 11899 | 41 | 0.000826 | 0 | 0.000309 |
| 88.4  | 100    | 26.1382  | 8576  | 25 | 0.134731 | 0 | 0.000121 |
| 23.3  | 100    | 38.2439  | 11894 | 52 | 6.73E-05 | 0 | 2.45E-05 |
| 0.4   | 100    | 39.3185  | 12268 | 47 | 0.000489 | 0 | 5.03E-05 |
| 59.7  | 100    | 17.3988  | 5191  | 57 | 7.74E-05 | 0 | 0.000224 |
| 61.5  | 100    | 20.9241  | 6613  | 36 | 0.002427 | 0 | 0.00107  |
| 13.4  | 100    | 41.6042  | 13071 | 41 | 0.001116 | 0 | 0.000313 |
| 28.2  | 100    | 42.4856  | 14666 | 52 | 0.00025  | 0 | 0.000432 |
| 46.7  | 100    | 41.4448  | 14312 | 35 | 0.01048  | 0 | 1.1E-06  |
| 109.6 | 83.439 | 41.2147  | 14228 | 16 | 0.860653 | 0 | 0.000692 |
| 43.5  | 79.07  | 39.0617  | 13430 | 56 | 9.09E-05 | 0 | 1.36E-05 |
| 98.7  | 11.299 | 39.0301  | 13417 | 70 | 4.66E-06 | 0 | 5.64E-07 |
| 47.2  | 100    | 38.5269  | 13230 | 35 | 0.014038 | 0 | 9.02E-05 |
| 34.8  | 100    | 45.0863  | 15651 | 29 | 0.03898  | 0 | 0.00095  |
| 5.8   | 100    | 43.3426  | 14978 | 55 | 0.000111 | 0 | 0.000813 |
| 33.7  | 100    | 38.5193  | 13227 | 38 | 0.006183 | 0 | 0.000306 |
| 0     | 100    | 36.4744  | 11266 | 43 | 0.000739 | 0 | 0.001143 |
| 0     | 100    | 36.4744  | 11266 | 43 | 0.000739 | 0 | 0.001143 |
| 21    | 100    | 35.7026  | 11007 | 27 | 0.074719 | 0 | 0.00086  |
| 86.4  | 13.595 | 36.5776  | 12481 | 54 | 0.00013  | 0 | 0.000105 |
| 18.3  | 100    | 36.0723  | 12281 | 35 | 0.009474 | 0 | 0.001162 |
| 4.3   | 100    | 112.4912 | 42208 | 65 | 1.5E-05  | 0 | 4.88E-06 |
| 2.8   | 100    | 111.9885 | 42030 | 41 | 0.003847 | 0 | 0.00085  |
| 3.4   | 100    | 111.7841 | 41957 | 51 | 0.000387 | 0 | 0.000248 |
| 2.4   | 100    | 108.6692 | 40818 | 52 | 0.000282 | 0 | 0.000402 |
| 43.2  | 100    | 44.7014  | 14202 | 21 | 0.278708 | 0 | 0.000485 |
| 31.6  | 100    | 44.8503  | 14256 | 34 | 0.015574 | 0 | 2.32E-05 |
| 10.7  | 100    | 118.5078 | 48666 | 77 | 8.52E-07 | 0 | 1.3E-10  |
| 6     | 100    | 118.9555 | 48869 | 53 | 0.000182 | 0 | 1.47E-08 |
| 18.9  | 73.93  | 119.0163 | 48897 | 56 | 0.000101 | 0 | 1.65E-09 |
| 0.8   | 100    | 118.9671 | 48874 | 36 | 0.009471 | 0 | 0.000127 |
| 45.4  | 100    | 110.5763 | 45456 | 88 | 4.97E-08 | 0 | 2.14E-08 |

|       |        |          |       |     |          |   |          |
|-------|--------|----------|-------|-----|----------|---|----------|
| 3.9   | 100    | 110.4935 | 45418 | 46  | 0.001191 | 0 | 0.000157 |
| 22    | 100    | 110.1616 | 45262 | 85  | 1.02E-07 | 0 | 1.4E-08  |
| 20.3  | 100    | 110.0687 | 45218 | 79  | 3.13E-07 | 0 | 3.23E-07 |
| 96.4  | 47.507 | 110.0524 | 45210 | 101 | 3.87E-09 | 0 | 6.12E-10 |
| 27    | 4.453  | 109.9809 | 45179 | 72  | 3.03E-06 | 0 | 1.76E-07 |
| 1.7   | 100    | 109.4772 | 44962 | 36  | 0.011742 | 0 | 0.000953 |
| 0     | 100    | 130.742  | 53625 | 27  | 0.087169 | 0 | 0.00137  |
| 0     | 100    | 130.2398 | 53433 | 31  | 0.033722 | 0 | 0.000979 |
| 0.8   | 100    | 129.2332 | 53035 | 34  | 0.015867 | 0 | 0.000804 |
| 1.6   | 100    | 129.0619 | 52955 | 42  | 0.003129 | 0 | 1.51E-05 |
| 1.2   | 100    | 128.5583 | 52751 | 44  | 0.001616 | 0 | 9.61E-06 |
| 4.1   | 100    | 128.1745 | 52604 | 56  | 0.000114 | 0 | 4.87E-08 |
| 10.8  | 100    | 128.0551 | 52557 | 58  | 7.44E-05 | 0 | 1.24E-07 |
| 0     | 100    | 129.5675 | 53169 | 32  | 0.029819 | 0 | 0.001124 |
| 12.4  | 17.727 | 127.6697 | 52401 | 65  | 1.42E-05 | 0 | 3.21E-10 |
| 48.8  | 15.904 | 127.5482 | 52351 | 59  | 5.21E-05 | 0 | 8.41E-09 |
| 18.5  | 100    | 86.9379  | 35514 | 46  | 0.001    | 0 | 0.000708 |
| 55.1  | 100    | 86.2328  | 35196 | 94  | 1.35E-08 | 0 | 8.8E-10  |
| 21.8  | 100    | 82.6225  | 33655 | 76  | 1.08E-06 | 0 | 7.82E-05 |
| 16.5  | 100    | 90.8143  | 37134 | 39  | 0.003653 | 0 | 0.000672 |
| 18.2  | 100    | 75.032   | 26306 | 43  | 0.002308 | 0 | 0.000193 |
| 53.6  | 37.965 | 44.6375  | 16027 | 48  | 0.000569 | 0 | 0.000193 |
| 28.3  | 100    | 44.182   | 15844 | 34  | 0.013842 | 0 | 0.001253 |
| 24.6  | 100    | 61.4964  | 20728 | 49  | 0.000304 | 0 | 0.00091  |
| 15.5  | 100    | 61.5362  | 20741 | 97  | 5.49E-09 | 0 | 2.99E-06 |
| 110.5 | 100    | 61.9991  | 20925 | 47  | 0.000511 | 0 | 0.000269 |
| 42.8  | 100    | 45.2978  | 16283 | 47  | 0.00107  | 0 | 3.38E-05 |
| 15    | 100    | 62.0587  | 20947 | 71  | 1.84E-06 | 0 | 2.54E-05 |
| 18.7  | 100    | 34.1075  | 12112 | 54  | 0.000161 | 0 | 1.54E-05 |
| 158.5 | 91.245 | 33.7911  | 11989 | 15  | 1.278592 | 0 | 0.001339 |
| 14.4  | 100    | 64.603   | 21965 | 38  | 0.006083 | 0 | 0.000594 |
| 118   | 100    | 55.5376  | 20302 | 65  | 9.03E-06 | 0 | 0.00039  |
| 128.8 | 23.636 | 55.4786  | 20277 | 54  | 0.000124 | 0 | 0.000326 |
| 17.6  | 40.953 | 55.1333  | 20139 | 62  | 2.81E-05 | 0 | 2.71E-06 |
| 23.2  | 100    | 58.9816  | 19735 | 38  | 0.006528 | 0 | 3.12E-05 |
| 44.3  | 13.456 | 59.4635  | 21783 | 53  | 0.000182 | 0 | 0.000198 |
| 17.2  | 100    | 58.8738  | 19694 | 66  | 1.24E-05 | 0 | 1.27E-07 |
| 10.8  | 100    | 53.4164  | 19451 | 75  | 7.24E-07 | 0 | 4.65E-05 |
| 0.9   | 100    | 52.9148  | 19248 | 54  | 0.000111 | 0 | 0.000581 |
| 58.5  | 100    | 15.3232  | 4494  | 52  | 0.000237 | 0 | 0.000131 |
| 98.7  | 45.127 | 140.6172 | 57522 | 79  | 5.37E-07 | 0 | 7.86E-09 |
| 27    | 3.974  | 66.5054  | 22770 | 67  | 4.6E-06  | 0 | 2.62E-08 |
| 7     | 100    | 25.3838  | 8744  | 48  | 0.000435 | 0 | 8.54E-05 |
| 90.4  | 100    | 66.6988  | 22849 | 48  | 0.000342 | 0 | 8.04E-07 |
| 20.2  | 100    | 66.7012  | 22850 | 33  | 0.013247 | 0 | 0.000563 |
| 8.1   | 100    | 24.785   | 8525  | 55  | 0.000121 | 0 | 0.000681 |
| 29.6  | 100    | 66.8197  | 22901 | 27  | 0.070063 | 0 | 0.000796 |
| 82.9  | 100    | 66.1954  | 22635 | 39  | 0.002718 | 0 | 3.05E-06 |
| 31.9  | 100    | 28.857   | 10044 | 61  | 2.47E-05 | 0 | 0.000137 |
| 35.8  | 7.894  | 28.7958  | 10022 | 74  | 1.2E-06  | 0 | 1.6E-07  |
| 56.1  | 9.066  | 28.7394  | 10001 | 59  | 4.35E-05 | 0 | 1.22E-06 |
| 13.9  | 100    | 66.0003  | 22555 | 61  | 1.8E-05  | 0 | 5.76E-07 |

|       |        |          |       |    |          |   |          |
|-------|--------|----------|-------|----|----------|---|----------|
| 135   | 79.31  | 19.443   | 6411  | 42 | 0.001342 | 0 | 5.44E-06 |
| 72.6  | 10.615 | 67.2552  | 23080 | 32 | 0.025778 | 0 | 0.000108 |
| 62.1  | 32.456 | 67.312   | 23105 | 42 | 0.002204 | 0 | 4.41E-06 |
| 15.8  | 100    | 67.0107  | 22979 | 67 | 4.15E-06 | 0 | 1.2E-07  |
| 8.4   | 100    | 129.6971 | 47792 | 65 | 1.27E-05 | 0 | 0.000225 |
| 70.5  | 29.922 | 57.8829  | 19176 | 48 | 0.00053  | 0 | 0.000331 |
| 129.5 | 5.768  | 57.8451  | 19162 | 51 | 0.000286 | 0 | 0.000274 |
| 90.9  | 100    | 58.3511  | 19356 | 39 | 0.003963 | 0 | 0.000977 |
| 94    | 29.34  | 52.0162  | 16935 | 50 | 0.000352 | 0 | 9.43E-06 |
| 116.1 | 39.624 | 51.8876  | 16884 | 34 | 0.015618 | 0 | 4.57E-05 |
| 179.8 | 52.989 | 51.5126  | 16744 | 19 | 0.523166 | 0 | 0.001268 |
| 9.4   | 100    | 130.9318 | 48282 | 58 | 2.87E-05 | 0 | 9.98E-05 |
| 106.7 | 65.364 | 52.3896  | 17069 | 32 | 0.025623 | 0 | 1.65E-05 |
| 25.6  | 100    | 54.0232  | 17691 | 39 | 0.004027 | 0 | 0.000443 |
| 85.4  | 71.736 | 53.6901  | 17564 | 68 | 6.31E-06 | 0 | 8.74E-07 |
| 131.6 | 100    | 53.3045  | 17423 | 39 | 0.004099 | 0 | 1.88E-05 |
| 72.1  | 100    | 53.024   | 17315 | 51 | 0.00028  | 0 | 1.65E-05 |
| 96.5  | 100    | 52.8914  | 17259 | 34 | 0.015562 | 0 | 1.16E-05 |
| 112.3 | 68.263 | 52.5191  | 17121 | 50 | 0.000395 | 0 | 2.86E-06 |
| 12.1  | 100    | 60.7721  | 20241 | 35 | 0.012847 | 0 | 0.00115  |
| 14.3  | 100    | 66.3615  | 22402 | 70 | 4.38E-06 | 0 | 1.61E-06 |
| 34.4  | 100    | 66.3449  | 22395 | 58 | 7.54E-05 | 0 | 5.12E-08 |
| 28    | 100    | 66.335   | 22391 | 15 | 1.362769 | 0 | 0.001125 |
| 76.6  | 100    | 66.1908  | 22334 | 55 | 0.000156 | 0 | 1.07E-08 |
| 28.7  | 100    | 66.1601  | 22322 | 65 | 1.33E-05 | 0 | 3.55E-09 |
| 90.1  | 100    | 66.1364  | 22313 | 66 | 1.17E-05 | 0 | 8.23E-09 |
| 8.7   | 100    | 65.6336  | 22124 | 58 | 6.43E-05 | 0 | 1.07E-05 |
| 4.9   | 100    | 125.9063 | 46344 | 63 | 1.29E-05 | 0 | 3.59E-06 |
| 1.7   | 100    | 124.8722 | 45924 | 44 | 0.001175 | 0 | 0.000131 |
| 19.8  | 6.594  | 125.3778 | 46140 | 66 | 6.26E-06 | 0 | 7.84E-07 |
| 1.5   | 100    | 125.4662 | 46177 | 63 | 1.34E-05 | 0 | 5.57E-06 |
| 22.8  | 100    | 66.8631  | 22603 | 68 | 6.35E-06 | 0 | 2.72E-07 |
| 15    | 100    | 66.8479  | 22598 | 71 | 3.66E-06 | 0 | 4.09E-08 |
| 63.6  | 100    | 66.8365  | 22594 | 51 | 0.000319 | 0 | 9.23E-07 |
| 48    | 100    | 62.575   | 20928 | 46 | 0.001112 | 0 | 0.000246 |
| 41.7  | 100    | 62.4689  | 20888 | 39 | 0.005433 | 0 | 5.83E-05 |
| 23    | 100    | 61.6667  | 20582 | 35 | 0.013453 | 0 | 0.000676 |
| 132.3 | 13.43  | 63.0777  | 21124 | 54 | 0.00019  | 0 | 9.39E-06 |
| 39.8  | 91.734 | 63.1756  | 21167 | 84 | 1.92E-07 | 0 | 4.42E-07 |
| 79.6  | 100    | 63.5845  | 21329 | 40 | 0.00466  | 0 | 9.38E-05 |
| 16.4  | 100    | 63.327   | 21231 | 79 | 3.52E-07 | 0 | 1.36E-05 |
| 19    | 100    | 48.9886  | 15796 | 36 | 0.010631 | 0 | 0.001498 |
| 10.9  | 100    | 137.2718 | 50771 | 75 | 1.44E-06 | 0 | 5.52E-05 |
| 9.6   | 100    | 137.9984 | 51112 | 59 | 4.91E-05 | 0 | 1.88E-06 |
| 18.8  | 100    | 29.6159  | 8979  | 11 | 3.506531 | 0 | 0.000709 |
| 24    | 100    | 45.3994  | 14458 | 22 | 0.181528 | 0 | 0.000989 |
| 58.2  | 100    | 40.4008  | 12663 | 29 | 0.051084 | 0 | 0.00107  |
| 42.8  | 100    | 39.7474  | 12433 | 45 | 0.001411 | 0 | 1.98E-05 |
| 82.9  | 45.69  | 38.0827  | 11850 | 46 | 0.000866 | 0 | 0.000361 |
| 93.9  | 76.235 | 37.5787  | 11684 | 52 | 0.000228 | 0 | 5.16E-05 |
| 9.9   | 100    | 96.0181  | 34132 | 69 | 5.44E-06 | 0 | 2.47E-06 |
| 21.9  | 12.039 | 95.9135  | 34092 | 67 | 9.44E-06 | 0 | 2.76E-06 |

|       |        |          |       |    |          |   |          |
|-------|--------|----------|-------|----|----------|---|----------|
| 18.6  | 65.367 | 95.1516  | 33793 | 53 | 0.000242 | 0 | 2.35E-06 |
| 6.9   | 100    | 114.4175 | 41627 | 59 | 4.3E-05  | 0 | 4.33E-06 |
| 43    | 16.128 | 109.5699 | 39641 | 64 | 1.1E-05  | 0 | 1.82E-06 |
| 9.1   | 100    | 110.0775 | 39847 | 34 | 0.008684 | 0 | 0.001179 |
| 20.4  | 26.194 | 109.6211 | 39666 | 63 | 1.09E-05 | 0 | 1.01E-05 |
| 55.5  | 2.679  | 113.9162 | 41416 | 58 | 4.98E-05 | 0 | 4.51E-06 |
| 35.2  | 100    | 114.1185 | 41508 | 60 | 3.22E-05 | 0 | 3.61E-06 |
| 9.6   | 100    | 101.7739 | 36418 | 71 | 3.93E-06 | 0 | 5.11E-07 |
| 5.5   | 100    | 102.276  | 36625 | 65 | 1.37E-05 | 0 | 1.5E-05  |
| 4.1   | 100    | 76.4575  | 26371 | 63 | 2.11E-05 | 0 | 0.000813 |
| 20.9  | 100    | 79.1464  | 27407 | 44 | 0.001701 | 0 | 0.000133 |
| 24.6  | 100    | 78.5484  | 27181 | 39 | 0.004474 | 0 | 0.000633 |
| 39    | 100    | 86.6447  | 30376 | 58 | 5.61E-05 | 0 | 3.89E-06 |
| 38.1  | 14.055 | 87.0388  | 30543 | 58 | 6.22E-05 | 0 | 3.55E-06 |
| 26.9  | 100    | 87.147   | 30588 | 76 | 1.03E-06 | 0 | 1.28E-07 |
| 17    | 100    | 87.5565  | 30753 | 54 | 0.000158 | 0 | 0.000402 |
| 9.3   | 100    | 77.3847  | 28626 | 43 | 0.002048 | 0 | 0.00073  |
| 28.8  | 100    | 77.3764  | 28622 | 50 | 0.000401 | 0 | 0.000149 |
| 18.7  | 100    | 77.3213  | 28601 | 39 | 0.00452  | 0 | 0.001131 |
| 9.2   | 45.34  | 77.888   | 28860 | 44 | 0.001584 | 0 | 0.001377 |
| 40.4  | 14.6   | 77.8822  | 28857 | 59 | 4.64E-05 | 0 | 0.000677 |
| 31.8  | 58.687 | 77.8291  | 28832 | 71 | 2.82E-06 | 0 | 3.61E-07 |
| 69.6  | 33.867 | 72.3344  | 26548 | 37 | 0.008208 | 0 | 0.000513 |
| 8.7   | 100    | 80.4924  | 29875 | 47 | 0.000497 | 0 | 0.000703 |
| 7.3   | 100    | 89.131   | 33446 | 39 | 0.006301 | 0 | 7.51E-05 |
| 35.3  | 22.101 | 80.9931  | 30076 | 60 | 2.62E-05 | 0 | 0.000508 |
| 21    | 81.525 | 140.9009 | 52494 | 68 | 7.05E-06 | 0 | 2.6E-09  |
| 8.2   | 100    | 85.0815  | 31716 | 45 | 0.001372 | 0 | 1.34E-05 |
| 21.8  | 57.241 | 84.7409  | 31575 | 87 | 7.82E-08 | 0 | 2.72E-09 |
| 41.6  | 36.728 | 84.5915  | 31514 | 57 | 4.99E-05 | 0 | 2.58E-05 |
| 15.3  | 100    | 84.585   | 31511 | 50 | 0.000292 | 0 | 7.86E-05 |
| 17.6  | 10.666 | 84.5786  | 31508 | 62 | 2.76E-05 | 0 | 3.72E-07 |
| 13    | 100    | 84.0855  | 31313 | 51 | 0.000195 | 0 | 3.49E-05 |
| 128.7 | 52.519 | 52.1467  | 18447 | 51 | 0.000277 | 0 | 1.35E-05 |
| 14.2  | 100    | 51.9744  | 18386 | 53 | 0.000188 | 0 | 0.000284 |
| 11.5  | 100    | 56.1968  | 20049 | 58 | 4.97E-05 | 0 | 0.000373 |
| 61.8  | 10.876 | 55.6954  | 19859 | 63 | 1.63E-05 | 0 | 2.65E-05 |
| 19.2  | 100    | 55.2883  | 19700 | 61 | 2.95E-05 | 0 | 0.00092  |
| 29.9  | 100    | 55.1872  | 19662 | 63 | 1.75E-05 | 0 | 0.000126 |
| 30.9  | 57.749 | 55.1744  | 19656 | 80 | 3.9E-07  | 0 | 8.61E-06 |
| 32.2  | 100    | 54.5706  | 19419 | 61 | 3.03E-05 | 0 | 6.17E-05 |
| 176.5 | 100    | 51.884   | 18349 | 49 | 0.000503 | 0 | 0.000832 |
| 57    | 96.284 | 48.8739  | 17165 | 61 | 3E-05    | 0 | 3.08E-07 |
| 90.5  | 27.641 | 48.864   | 17161 | 65 | 1.17E-05 | 0 | 1.36E-06 |
| 77.7  | 100    | 48.7479  | 17113 | 47 | 0.000771 | 0 | 0.001487 |
| 45.2  | 100    | 48.3604  | 16951 | 42 | 0.002347 | 0 | 0.000193 |
| 17.4  | 100    | 24.8721  | 7452  | 37 | 0.004899 | 0 | 0.000406 |
| 73.5  | 88.681 | 49.3662  | 17354 | 71 | 3.1E-06  | 0 | 3.31E-07 |
| 48.4  | 100    | 51.6374  | 18244 | 38 | 0.006053 | 0 | 9.78E-05 |
| 124.5 | 10.296 | 51.5459  | 18211 | 46 | 0.000994 | 0 | 1.55E-05 |
| 6.9   | 100    | 64.4819  | 23396 | 51 | 0.000387 | 0 | 2.08E-05 |
| 15    | 100    | 64.9897  | 23609 | 45 | 0.001484 | 0 | 1.54E-05 |

|       |        |          |       |     |          |   |          |
|-------|--------|----------|-------|-----|----------|---|----------|
| 18.3  | 100    | 66.7966  | 24344 | 37  | 0.007539 | 0 | 0.000591 |
| 4.4   | 100    | 16.1237  | 4563  | 74  | 1.26E-06 | 0 | 0.000191 |
| 17.2  | 100    | 60.8113  | 21908 | 39  | 0.005565 | 0 | 0.000899 |
| 100.1 | 84.294 | 59.5843  | 21393 | 60  | 3.22E-05 | 0 | 0.00043  |
| 7.7   | 100    | 59.314   | 21285 | 49  | 0.000447 | 0 | 0.000421 |
| 9.8   | 100    | 61.4395  | 22166 | 31  | 0.035334 | 0 | 0.001462 |
| 17.1  | 100    | 62.4712  | 22585 | 40  | 0.005171 | 0 | 0.00007  |
| 12.8  | 100    | 139.2355 | 51682 | 45  | 0.00122  | 0 | 0.000282 |
| 10.2  | 32.036 | 139.327  | 51725 | 52  | 0.000278 | 0 | 0.000414 |
| 0.7   | 100    | 124.8609 | 48534 | 61  | 2.31E-05 | 0 | 5.95E-05 |
| 14.1  | 10.981 | 124.757  | 48489 | 81  | 2.34E-07 | 0 | 1.77E-07 |
| 2.9   | 100    | 130.0958 | 50708 | 36  | 0.008367 | 0 | 0.000573 |
| 2.3   | 100    | 129.9813 | 50662 | 25  | 0.121155 | 0 | 0.000295 |
| 44.8  | 65.537 | 139.0175 | 51578 | 93  | 2.08E-08 | 0 | 9.48E-11 |
| 60.9  | 15.889 | 119.5386 | 46246 | 76  | 9.54E-07 | 0 | 1.05E-06 |
| 130.7 | 100    | 119.4648 | 46213 | 73  | 2.18E-06 | 0 | 1.1E-06  |
| 35.5  | 100    | 119.2503 | 46120 | 78  | 7.02E-07 | 0 | 4.02E-07 |
| 6.9   | 100    | 119.605  | 46275 | 42  | 0.001411 | 0 | 0.000185 |
| 33.2  | 49.318 | 117.6027 | 45439 | 81  | 3.34E-07 | 0 | 4.35E-09 |
| 10.2  | 100    | 119.6191 | 46282 | 29  | 0.033612 | 0 | 0.000665 |
| 51.1  | 100    | 120.1305 | 46497 | 46  | 0.000558 | 0 | 5.1E-08  |
| 47.7  | 93.079 | 120.1098 | 46487 | 26  | 0.062924 | 0 | 0.000106 |
| 48    | 76.948 | 119.7547 | 46340 | 71  | 3.05E-06 | 0 | 1.46E-06 |
| 19.7  | 95.157 | 119.7223 | 46327 | 51  | 0.000325 | 0 | 0.000263 |
| 3     | 100    | 130.4838 | 50869 | 25  | 0.147277 | 0 | 0.000856 |
| 9.6   | 100    | 139.7926 | 54866 | 26  | 0.104564 | 0 | 0.001055 |
| 10.7  | 100    | 138.1534 | 51186 | 82  | 2.52E-07 | 0 | 9.76E-09 |
| 61.5  | 64.805 | 140.402  | 55158 | 111 | 3.6E-10  | 0 | 1.26E-08 |
| 18.8  | 23.753 | 140.4004 | 55157 | 78  | 7.62E-07 | 0 | 5.66E-06 |
| 296.9 | 45.176 | 140.3995 | 55156 | 103 | 2.24E-09 | 0 | 1.21E-10 |
| 6.2   | 100    | 132.3789 | 51663 | 49  | 0.000515 | 0 | 0.000248 |
| 22.5  | 90.012 | 138.6536 | 51410 | 84  | 1.75E-07 | 0 | 8.18E-09 |
| 3.4   | 100    | 131.4905 | 51269 | 28  | 0.072961 | 0 | 0.000551 |
| 1.8   | 100    | 131.1955 | 51151 | 46  | 0.000782 | 0 | 0.00022  |
| 4.3   | 100    | 130.987  | 51069 | 35  | 0.01191  | 0 | 0.000186 |
| 24.3  | 45.333 | 138.8163 | 51483 | 33  | 0.021777 | 0 | 0.001019 |
| 37.9  | 89.029 | 130.597  | 50911 | 77  | 6.75E-07 | 0 | 3.22E-08 |
| 24.3  | 16.251 | 138.5014 | 51341 | 90  | 4.3E-08  | 0 | 1.12E-10 |
| 153.9 | 66.371 | 140.5616 | 52306 | 91  | 1.71E-08 | 0 | 9.05E-14 |
| 187.1 | 3.622  | 140.6052 | 52330 | 86  | 8.93E-08 | 0 | 5.2E-07  |
| 43.1  | 3.362  | 140.6058 | 52331 | 60  | 3.47E-05 | 0 | 5.61E-06 |
| 47.7  | 66.817 | 140.5117 | 52276 | 21  | 0.334271 | 0 | 0.000828 |
| 20.2  | 100    | 91.6842  | 34482 | 64  | 1.32E-05 | 0 | 0.000411 |
| 272.3 | 19.011 | 140.6981 | 52384 | 108 | 6.58E-10 | 0 | 1.05E-09 |
| 92.7  | 3.944  | 140.6942 | 52379 | 79  | 6.09E-07 | 0 | 3.08E-08 |
| 19.1  | 100    | 94.4966  | 35613 | 57  | 7.67E-05 | 0 | 2.83E-05 |
| 55.6  | 100    | 140.2836 | 52160 | 95  | 1.34E-08 | 0 | 2.62E-09 |
| 20.7  | 35.504 | 109.7951 | 42153 | 69  | 4.54E-06 | 0 | 1.05E-06 |
| 10.7  | 100    | 114.4274 | 44092 | 36  | 0.011092 | 0 | 7.74E-05 |
| 3.5   | 100    | 109.3631 | 41968 | 59  | 4.52E-05 | 0 | 5.54E-06 |
| 11.6  | 45.286 | 103.03   | 39320 | 63  | 1.54E-05 | 0 | 2.56E-05 |
| 16    | 8.17   | 103.0016 | 39308 | 62  | 1.62E-05 | 0 | 3.3E-06  |

|       |        |          |       |     |          |   |          |
|-------|--------|----------|-------|-----|----------|---|----------|
| 19.8  | 4.511  | 103.9987 | 39726 | 61  | 2.24E-05 | 0 | 1.43E-05 |
| 21.7  | 36.161 | 104.1389 | 39785 | 101 | 2.06E-09 | 0 | 5.48E-10 |
| 8.8   | 87.823 | 104.5018 | 39926 | 56  | 5.89E-05 | 0 | 5.4E-05  |
| 6.5   | 100    | 107.6699 | 41288 | 83  | 1.99E-07 | 0 | 4.73E-07 |
| 39.6  | 6.557  | 107.6148 | 41266 | 77  | 8.04E-07 | 0 | 6.6E-09  |
| 26    | 22.596 | 105.1674 | 40217 | 72  | 2.09E-06 | 0 | 2.11E-07 |
| 26    | 22.596 | 105.1674 | 40217 | 72  | 2.09E-06 | 0 | 4.64E-06 |
| 33.3  | 100    | 105.0077 | 40141 | 41  | 0.002167 | 0 | 0.000143 |
| 0.7   | 100    | 108.1175 | 41486 | 30  | 0.038316 | 0 | 0.001154 |
| 10.8  | 100    | 104.8671 | 40620 | 49  | 0.000377 | 0 | 0.000287 |
| 17.6  | 100    | 104.8573 | 40616 | 55  | 8.36E-05 | 0 | 5.54E-05 |
| 19.3  | 77.636 | 107.0818 | 41542 | 71  | 1.45E-06 | 0 | 1.12E-07 |
| 28.9  | 18.169 | 90.8862  | 34679 | 68  | 4.73E-06 | 0 | 5.54E-06 |
| 5     | 100    | 97.2617  | 37362 | 94  | 3.74E-09 | 0 | 3.58E-10 |
| 36.8  | 12.449 | 61.7089  | 22696 | 76  | 8.75E-07 | 0 | 1.69E-06 |
| 334.4 | 100    | 15.352   | 4735  | 16  | 0.505178 | 0 | 0.000176 |
| 53    | 100    | 15.1094  | 4609  | 62  | 1.97E-05 | 0 | 9.38E-05 |
| 351.6 | 51.021 | 140.5647 | 54173 | 122 | 1.34E-11 | 0 | 1.71E-13 |
| 198.7 | 100    | 15.0712  | 4591  | 43  | 0.001975 | 0 | 6.19E-06 |
| 153.8 | 4.086  | 140.5623 | 54171 | 86  | 5.1E-08  | 0 | 8.32E-14 |
| 192   | 100    | 14.3023  | 4213  | 51  | 0.000296 | 0 | 8.54E-05 |
| 192   | 100    | 14.3023  | 4213  | 51  | 0.000296 | 0 | 8.54E-05 |
| 57.6  | 100    | 18.0111  | 6128  | 37  | 0.008863 | 0 | 0.000172 |
| 137.8 | 35.682 | 140.3369 | 54060 | 100 | 3.81E-09 | 0 | 2.24E-13 |
| 137.8 | 49.577 | 140.3382 | 54061 | 74  | 1.7E-06  | 0 | 2E-10    |
| 75.9  | 100    | 140.2838 | 54033 | 22  | 0.295617 | 0 | 0.000277 |
| 18.4  | 100    | 113.2511 | 44094 | 59  | 1.01E-05 | 0 | 1.13E-07 |
| 6.4   | 100    | 113.2489 | 44093 | 77  | 1.46E-07 | 0 | 1.76E-09 |
| 3.8   | 100    | 127.3299 | 49775 | 90  | 1.07E-08 | 0 | 3.24E-09 |
| 7.6   | 88.088 | 124.9801 | 48834 | 104 | 4.11E-10 | 0 | 1.37E-12 |
| 62.3  | 57.667 | 42.8116  | 15140 | 56  | 0.000103 | 0 | 0.000908 |
| 10.1  | 100    | 133.6956 | 51119 | 73  | 1.88E-06 | 0 | 1.55E-07 |
| 149.2 | 100    | 121.5125 | 45915 | 62  | 1.51E-05 | 0 | 6.88E-05 |
| 20    | 100    | 130.1837 | 49638 | 51  | 0.00023  | 0 | 0.000234 |
| 56.1  | 54.094 | 121.645  | 45973 | 49  | 0.000251 | 0 | 0.000112 |
| 3.4   | 100    | 121.3798 | 45853 | 55  | 0.000153 | 0 | 4.4E-06  |
| 28.2  | 100    | 121.1615 | 45756 | 43  | 0.001067 | 0 | 0.000946 |
| 5.7   | 60.423 | 121.3609 | 45844 | 47  | 0.000923 | 0 | 0.000106 |
| 15.1  | 100    | 126.0459 | 47867 | 57  | 5.66E-05 | 0 | 4.41E-05 |
| 20.9  | 100    | 125.5433 | 47643 | 64  | 1.22E-05 | 0 | 8E-05    |
| 14.2  | 100    | 48.9227  | 17125 | 34  | 0.018918 | 0 | 0.001093 |
| 32.3  | 100    | 50.7151  | 17853 | 40  | 0.004027 | 0 | 0.00019  |
| 87.2  | 69.608 | 46.3319  | 16101 | 30  | 0.03487  | 0 | 0.000866 |
| 22.8  | 100    | 47.9106  | 16730 | 35  | 0.014716 | 0 | 0.000308 |
| 18.4  | 98.781 | 48.4351  | 16932 | 50  | 0.00046  | 0 | 0.000616 |
| 42.1  | 6.989  | 48.4165  | 16924 | 70  | 5.02E-06 | 0 | 7.95E-07 |
| 32.1  | 4.198  | 48.2298  | 16858 | 75  | 1.55E-06 | 0 | 1.11E-06 |
| 32.6  | 51.107 | 121.8    | 46044 | 79  | 4.98E-07 | 0 | 2.35E-06 |
| 7.3   | 31.221 | 127.2362 | 48363 | 58  | 5.02E-05 | 0 | 2.89E-06 |
| 22.1  | 100    | 122.5376 | 46374 | 38  | 0.003962 | 0 | 6.56E-06 |
| 70.6  | 100    | 38.985   | 13186 | 39  | 0.006473 | 0 | 2.84E-05 |
| 2.4   | 100    | 126.7329 | 48152 | 48  | 0.000561 | 0 | 0.000786 |



|       |        |          |       |     |          |   |          |
|-------|--------|----------|-------|-----|----------|---|----------|
| 6.4   | 100    | 122.7257 | 46453 | 70  | 3.04E-06 | 0 | 1.61E-07 |
| 99.6  | 100    | 53.0735  | 18828 | 35  | 0.009065 | 0 | 9.76E-05 |
| 131.4 | 25.559 | 35.1176  | 11698 | 36  | 0.009041 | 0 | 0.000684 |
| 37.9  | 100    | 52.5688  | 18629 | 37  | 0.005495 | 0 | 0.000109 |
| 36.5  | 30.949 | 136.882  | 52473 | 68  | 5.97E-06 | 0 | 2.41E-06 |
| 45.8  | 100    | 137.4001 | 52705 | 63  | 1.62E-05 | 0 | 4.18E-06 |
| 7.8   | 100    | 137.3732 | 52692 | 62  | 2.08E-05 | 0 | 6.02E-06 |
| 164.4 | 96.265 | 83.2026  | 31578 | 41  | 0.000963 | 0 | 0.000742 |
| 6.1   | 18.36  | 136.8654 | 52465 | 61  | 2.62E-05 | 0 | 1.32E-05 |
| 17    | 29.832 | 74.2567  | 27583 | 58  | 4.58E-05 | 0 | 5.86E-05 |
| 73.3  | 45.038 | 79.2322  | 29919 | 66  | 8.49E-06 | 0 | 1.9E-06  |
| 27.2  | 6.203  | 74.2206  | 27565 | 63  | 1.5E-05  | 0 | 0.000186 |
| 4.8   | 100    | 80.3004  | 30346 | 51  | 4.06E-05 | 0 | 0.000772 |
| 0.8   | 100    | 80.3161  | 30104 | 88  | 2.66E-08 | 0 | 1.78E-07 |
| 0.8   | 100    | 80.3161  | 30104 | 88  | 2.66E-08 | 0 | 1.78E-07 |
| 25.1  | 100    | 77.8278  | 29038 | 37  | 0.006431 | 0 | 0.000793 |
| 96.9  | 34.321 | 77.6074  | 28947 | 43  | 0.001786 | 0 | 0.000209 |
| 29.1  | 72.409 | 77.2552  | 28809 | 51  | 9.12E-05 | 0 | 1.16E-05 |
| 27    | 50.545 | 77.95    | 29089 | 46  | 0.00088  | 0 | 0.000228 |
| 8.8   | 100    | 134.4949 | 51472 | 84  | 1.23E-07 | 0 | 3.35E-09 |
| 27.2  | 71.083 | 116.7259 | 43831 | 71  | 8.88E-07 | 0 | 2.95E-06 |
| 106.4 | 86.245 | 83.7117  | 31804 | 54  | 4.92E-05 | 0 | 2.04E-06 |
| 14.9  | 100    | 83.7369  | 31816 | 49  | 0.00018  | 0 | 0.000441 |
| 65    | 61.196 | 65.8657  | 24036 | 58  | 6.83E-05 | 0 | 0.000138 |
| 5.1   | 100    | 117.5677 | 44177 | 22  | 0.329504 | 0 | 0.001375 |
| 10.1  | 100    | 117.3399 | 44082 | 53  | 0.000229 | 0 | 1.1E-05  |
| 6.5   | 100    | 116.8327 | 43876 | 35  | 0.015115 | 0 | 0.000138 |
| 32.5  | 100    | 117.0551 | 43971 | 67  | 8.3E-06  | 0 | 6.99E-10 |
| 11.7  | 47.641 | 141.1568 | 54526 | 57  | 7.05E-05 | 0 | 2.45E-06 |
| 73.4  | 24.701 | 141.1545 | 54524 | 73  | 1.6E-06  | 0 | 2.21E-10 |
| 24.4  | 100    | 68.8298  | 27853 | 41  | 0.0039   | 0 | 0.001062 |
| 70.7  | 21.442 | 69.0016  | 25764 | 55  | 0.000102 | 0 | 8.04E-05 |
| 209   | 26.102 | 141.1297 | 54508 | 80  | 3.99E-07 | 0 | 2.82E-08 |
| 53.7  | 44.422 | 69.215   | 25849 | 54  | 0.000125 | 0 | 0.0003   |
| 13.2  | 21.806 | 141.1306 | 54509 | 68  | 6.35E-06 | 0 | 8.01E-07 |
| 58.4  | 59.662 | 141.1895 | 54549 | 34  | 0.019142 | 0 | 1.91E-05 |
| 49.3  | 100    | 141.1699 | 54534 | 51  | 0.000151 | 0 | 9.31E-05 |
| 3     | 100    | 42.3734  | 16463 | 69  | 4.46E-06 | 0 | 7.46E-08 |
| 23.3  | 90.119 | 41.3565  | 16011 | 54  | 0.000141 | 0 | 2.54E-09 |
| 12.7  | 49.135 | 41.3077  | 15992 | 60  | 2.66E-05 | 0 | 7.14E-08 |
| 6.4   | 98.646 | 41.3767  | 16020 | 21  | 0.228102 | 0 | 0.000566 |
| 5.1   | 100    | 41.8681  | 16235 | 64  | 1.43E-05 | 0 | 1.66E-07 |
| 96.7  | 100    | 141.0806 | 54480 | 81  | 2.9E-07  | 0 | 3.28E-11 |
| 30.1  | 100    | 43.2027  | 16817 | 22  | 0.239046 | 0 | 0.001294 |
| 91.5  | 25.296 | 141.2008 | 54557 | 103 | 1.75E-09 | 0 | 8.29E-12 |
| 9.7   | 100    | 141.5186 | 54742 | 38  | 0.004725 | 0 | 8.75E-06 |
| 51.5  | 100    | 141.4786 | 54719 | 59  | 3.34E-05 | 0 | 6.54E-09 |
| 96.9  | 91.942 | 61.1145  | 24539 | 49  | 0.000524 | 0 | 0.000142 |
| 54.7  | 62.781 | 141.2515 | 54590 | 92  | 3.09E-08 | 0 | 1.99E-10 |
| 150.4 | 42.793 | 141.203  | 54559 | 70  | 1.27E-06 | 0 | 3.71E-09 |
| 234.8 | 60.568 | 141.2244 | 54572 | 67  | 2.16E-06 | 0 | 2.17E-08 |
| 15.6  | 12.651 | 141.2228 | 54571 | 64  | 4.97E-06 | 0 | 9.97E-07 |

|       |        |          |       |     |          |          |          |
|-------|--------|----------|-------|-----|----------|----------|----------|
| 9.3   | 100    | 88.9754  | 32172 | 74  | 1.83E-06 | 0        | 4.66E-08 |
| 22    | 100    | 83.5241  | 29907 | 66  | 9.13E-06 | 0        | 4.34E-06 |
| 26.5  | 100    | 88.995   | 32180 | 66  | 1.2E-05  | 0        | 2.08E-07 |
| 0.5   | 19.831 | 140.8361 | 54333 | 56  | 0.000113 | 0        | 0.000397 |
| 41    | 8.97   | 140.8617 | 54347 | 79  | 1.04E-07 | 0        | 9.37E-10 |
| 93.6  | 93.407 | 78.7865  | 28945 | 54  | 3.77E-05 | 0        | 0.000169 |
| 74.7  | 72.365 | 78.7008  | 28914 | 78  | 1.37E-07 | 0        | 1.1E-07  |
| 10.8  | 100    | 78.2811  | 28755 | 38  | 0.001436 | 0        | 0.000817 |
| 15.8  | 100    | 73.1445  | 29731 | 50  | 0.000133 | 0        | 3.3E-06  |
| 177   | 6.873  | 140.8339 | 54331 | 80  | 4.26E-07 | 0        | 1.15E-08 |
| 1.4   | 100    | 141.9983 | 55013 | 51  | 7.53E-05 | 0        | 1.27E-09 |
| 9.1   | 99.154 | 141.9891 | 55008 | 72  | 6.59E-07 | 0        | 5.66E-12 |
| 45    | 18.108 | 140.8194 | 54322 | 74  | 1.04E-06 | 0        | 1.11E-08 |
| 31.3  | 100    | 96.92    | 35468 | 46  | 0.000187 | 0        | 0.000425 |
| 192.2 | 50.222 | 140.8208 | 54323 | 98  | 4.55E-09 | 0        | 3.73E-11 |
| 20.6  | 100    | 78.1979  | 28723 | 87  | 2.08E-08 | 0        | 3.29E-08 |
| 110   | 46.184 | 140.7692 | 54289 | 80  | 3.27E-07 | 0        | 1.64E-06 |
| 50.2  | 24.687 | 141.701  | 54844 | 89  | 3E-08    | 0        | 4.49E-09 |
| 2.5   | 100    | 38.2441  | 14742 | 40  | 0.00116  | 0        | 0.001553 |
| 11.9  | 78.993 | 40.8043  | 15790 | 67  | 5.33E-06 | 0        | 4.77E-09 |
| 4.2   | 100    | 40.8692  | 15816 | 42  | 0.001569 | 0        | 8.15E-06 |
| 249   | 18.711 | 140.9143 | 54379 | 97  | 5.52E-09 | 0        | 3.37E-10 |
| 73    | 82.201 | 141.7067 | 54847 | 93  | 1.24E-08 | 0        | 2.54E-09 |
| 120.3 | 94.416 | 140.8661 | 54350 | 89  | 4.21E-08 | 0        | 4.42E-12 |
| 51    | 100    | 31.9506  | 12122 | 43  | 0.001967 | 0        | 0.000216 |
| 127.3 | 92.125 | 140.8713 | 54353 | 81  | 3.38E-07 | 0        | 7.67E-09 |
| 472.5 | 100    | 140.8756 | 54355 | 108 | 7.08E-10 | 0        | 1.68E-10 |
| 128.9 | 100    | 140.8879 | 54361 | 89  | 1.04E-08 | 0        | 3.62E-10 |
| 200.1 | 28.354 | 19.653   | 6918  | 51  | 0.000262 | 0        | 0.000223 |
| 189   | 63.781 | 140.9219 | 54385 | 81  | 2.94E-07 | 0        | 2.52E-10 |
| 14.3  | 100    | 58.2167  | 19454 | 41  | 0.00287  | 0.000141 | 0.00173  |
| 3.3   | 100    | 92.7701  | 34650 | 39  | 0.004192 | 0.000141 | 0.001675 |
| 14.8  | 100    | 78.6376  | 27216 | 35  | 0.011841 | 0.000141 | 0.001619 |
| 7.7   | 100    | 94.0937  | 35191 | 48  | 0.000595 | 0.000141 | 0.001672 |
| 11.7  | 100    | 57.2554  | 20463 | 47  | 0.000646 | 0.000141 | 0.001726 |
| 4.8   | 100    | 18.2828  | 5334  | 32  | 0.027156 | 0.000141 | 0.001766 |
| 3.1   | 100    | 131.9947 | 51490 | 23  | 0.213919 | 0.000141 | 0.001678 |
| 10.5  | 100    | 58.4507  | 20947 | 33  | 0.022017 | 0.000141 | 0.001699 |
| 6.5   | 100    | 68.0572  | 23061 | 30  | 0.049079 | 0.000141 | 0.001648 |
| 28.6  | 100    | 19.3347  | 6364  | 24  | 0.084236 | 0.000141 | 0.001642 |
| 10.2  | 100    | 86.8718  | 32349 | 41  | 0.002265 | 0.000141 | 0.001674 |
| 83.3  | 100    | 52.3921  | 18552 | 43  | 0.002099 | 0.000141 | 0.001785 |
| 2.2   | 100    | 81.123   | 30133 | 43  | 0.00159  | 0.000141 | 0.001568 |
| 7.6   | 100    | 52.4838  | 17108 | 43  | 0.001716 | 0.000141 | 0.001652 |
| 31.6  | 54.606 | 81.0147  | 30085 | 50  | 0.00025  | 0.000273 | 0.001881 |
| 0     | 100    | 131.0196 | 49994 | 49  | 0.00049  | 0.000273 | 0.001822 |
| 119.2 | 60.259 | 51.816   | 18320 | 51  | 0.000339 | 0.000273 | 0.001848 |
| 1.5   | 100    | 42.8762  | 16681 | 19  | 0.418898 | 0.000273 | 0.002017 |
| 91.6  | 100    | 19.5411  | 6453  | 25  | 0.123579 | 0.000273 | 0.002055 |
| 35.6  | 100    | 96.02    | 35085 | 48  | 0.000451 | 0.000273 | 0.002039 |
| 22.4  | 100    | 64.5711  | 21952 | 27  | 0.078468 | 0.000273 | 0.002043 |
| 14    | 100    | 51.9821  | 16922 | 40  | 0.00365  | 0.000273 | 0.001887 |

|       |        |          |       |    |          |          |          |
|-------|--------|----------|-------|----|----------|----------|----------|
| 35.9  | 100    | 36.243   | 12351 | 39 | 0.004171 | 0.000273 | 0.002034 |
| 14    | 100    | 77.4457  | 28886 | 35 | 0.010435 | 0.000273 | 0.002074 |
| 16.4  | 100    | 34.2415  | 11600 | 29 | 0.045102 | 0.000273 | 0.002125 |
| 14.6  | 100    | 62.6943  | 23009 | 31 | 0.027001 | 0.000273 | 0.002079 |
| 6.5   | 100    | 83.2299  | 31590 | 42 | 0.000868 | 0.000273 | 0.002045 |
| 128.2 | 39.311 | 44.1383  | 17220 | 63 | 6.16E-06 | 0.000407 | 0.00213  |
| 1.4   | 100    | 90.8609  | 32954 | 33 | 0.021877 | 0.000407 | 0.002152 |
| 3.4   | 100    | 110.1243 | 39868 | 31 | 0.018505 | 0.000525 | 0.002196 |
| 29.2  | 100    | 57.3422  | 18961 | 28 | 0.052925 | 0.000525 | 0.002291 |
| 19.7  | 20.572 | 141.2791 | 52702 | 26 | 0.037578 | 0.000525 | 0.002547 |
| 8.9   | 100    | 104.9209 | 37654 | 33 | 0.01232  | 0.000525 | 0.002166 |
| 57.8  | 100    | 140.932  | 54391 | 35 | 0.011442 | 0.000525 | 0.002412 |
| 37    | 100    | 63.3291  | 21232 | 39 | 0.003163 | 0.000525 | 0.002201 |
| 0     | 100    | 26.9972  | 8130  | 31 | 0.022146 | 0.000525 | 0.002207 |
| 18.2  | 100    | 62.0378  | 22403 | 34 | 0.016166 | 0.000525 | 0.00227  |
| 19.7  | 100    | 80.7929  | 30001 | 54 | 0.000117 | 0.000525 | 0.002378 |
| 12.9  | 100    | 61.6924  | 22618 | 41 | 0.003184 | 0.000525 | 0.002181 |
| 115.1 | 68.81  | 36.6622  | 12515 | 39 | 0.004649 | 0.000525 | 0.002218 |
| 25.7  | 100    | 33.2812  | 12662 | 35 | 0.014927 | 0.000525 | 0.002267 |
| 10    | 100    | 68.0758  | 25094 | 46 | 0.000867 | 0.000525 | 0.00259  |
| 10    | 100    | 75.5342  | 26524 | 36 | 0.009673 | 0.00065  | 0.002694 |
| 54.5  | 21.033 | 90.8964  | 34684 | 47 | 0.000558 | 0.00065  | 0.002675 |
| 46.9  | 100    | 115.1927 | 43152 | 51 | 0.000142 | 0.00065  | 0.002698 |
| 6.1   | 100    | 121.4284 | 45876 | 21 | 0.408773 | 0.00065  | 0.002729 |
| 29.5  | 100    | 43.6332  | 17003 | 48 | 0.000161 | 0.00065  | 0.002652 |
| 5.5   | 100    | 130.0735 | 49586 | 35 | 0.011511 | 0.00065  | 0.002753 |
| 42.6  | 100    | 45.7551  | 16450 | 50 | 0.000367 | 0.00065  | 0.002736 |
| 10.9  | 63.114 | 81.0176  | 33000 | 50 | 0.000418 | 0.000758 | 0.002829 |
| 23.8  | 100    | 40.7034  | 14386 | 36 | 0.006634 | 0.000758 | 0.003111 |
| 1.1   | 100    | 132.5012 | 51718 | 33 | 0.021073 | 0.000758 | 0.003006 |
| 3.1   | 100    | 120.5867 | 44169 | 27 | 0.045573 | 0.000758 | 0.003092 |
| 23.5  | 100    | 61.8647  | 20868 | 16 | 1.00969  | 0.000758 | 0.003142 |
| 14.2  | 100    | 79.2057  | 29105 | 31 | 0.006989 | 0.000758 | 0.003115 |
| 11.9  | 100    | 51.3167  | 20334 | 33 | 0.01434  | 0.000758 | 0.002993 |
| 2.7   | 100    | 72.9895  | 27295 | 52 | 2.72E-05 | 0.000758 | 0.003136 |
| 10.3  | 82.556 | 75.2789  | 28253 | 47 | 0.000379 | 0.000758 | 0.003199 |
| 71    | 100    | 57.1181  | 20430 | 21 | 0.26942  | 0.000758 | 0.003147 |
| 6.4   | 100    | 56.7599  | 20269 | 35 | 0.010646 | 0.000758 | 0.003165 |
| 8     | 100    | 48.5741  | 17445 | 55 | 0.000122 | 0.000758 | 0.003206 |
| 8.7   | 100    | 43.5705  | 16977 | 36 | 0.010149 | 0.000868 | 0.003354 |
| 5.7   | 100    | 86.973   | 32965 | 61 | 2.06E-05 | 0.000868 | 0.003367 |
| 9.5   | 100    | 76.7515  | 28611 | 40 | 0.001105 | 0.000868 | 0.003287 |
| 3.3   | 100    | 95.4097  | 33893 | 32 | 0.026753 | 0.000868 | 0.003409 |
| 3.2   | 100    | 14.639   | 4045  | 32 | 0.01186  | 0.000868 | 0.00327  |
| 8.5   | 100    | 48.0308  | 16778 | 27 | 0.087566 | 0.000868 | 0.003363 |
| 0.8   | 100    | 82.1191  | 33447 | 55 | 0.000142 | 0.000868 | 0.003426 |
| 33.6  | 100    | 48.0453  | 16785 | 34 | 0.004022 | 0.000868 | 0.003602 |
| 8.7   | 100    | 90.3023  | 33726 | 36 | 0.00628  | 0.000951 | 0.004214 |
| 12.7  | 100    | 93.0903  | 34784 | 51 | 0.000295 | 0.000951 | 0.004442 |
| 2.8   | 100    | 63.7487  | 25674 | 49 | 0.000439 | 0.000951 | 0.003706 |
| 8.5   | 100    | 109.9558 | 40919 | 32 | 0.006626 | 0.000951 | 0.003676 |
| 9.1   | 100    | 49.3763  | 17358 | 28 | 0.056566 | 0.000951 | 0.004385 |

|       |        |          |       |    |          |          |          |
|-------|--------|----------|-------|----|----------|----------|----------|
| 12.5  | 100    | 63.4534  | 22987 | 24 | 0.166578 | 0.000951 | 0.004452 |
| 5.9   | 100    | 130.494  | 48113 | 41 | 0.001432 | 0.000951 | 0.004572 |
| 1.6   | 100    | 83.4698  | 34004 | 32 | 0.021332 | 0.000951 | 0.003653 |
| 0.8   | 100    | 125.8836 | 46334 | 31 | 0.022739 | 0.000951 | 0.004002 |
| 2.3   | 100    | 109.1124 | 39448 | 25 | 0.069565 | 0.000951 | 0.004034 |
| 34.5  | 100    | 41.1327  | 14683 | 32 | 0.01853  | 0.000951 | 0.003771 |
| 16.9  | 100    | 44.8948  | 15512 | 29 | 0.059099 | 0.000951 | 0.0042   |
| 38.4  | 100    | 28.433   | 9887  | 22 | 0.22865  | 0.000951 | 0.004442 |
| 426.9 | 100    | 17.9566  | 6100  | 33 | 0.016465 | 0.000951 | 0.004281 |
| 3.9   | 100    | 64.9303  | 23868 | 43 | 0.001685 | 0.000951 | 0.003786 |
| 23.4  | 100    | 23.8515  | 8166  | 65 | 7.63E-06 | 0.000951 | 0.004077 |
| 18    | 100    | 66.7947  | 22579 | 45 | 0.000689 | 0.000951 | 0.004175 |
| 4.2   | 100    | 97.0359  | 34547 | 31 | 0.038103 | 0.000951 | 0.00433  |
| 5.7   | 9.95   | 116.692  | 43817 | 33 | 0.005437 | 0.000951 | 0.004337 |
| 84.2  | 100    | 51.2865  | 20320 | 43 | 0.001721 | 0.000951 | 0.003981 |
| 4.6   | 100    | 88.9118  | 33357 | 29 | 0.067091 | 0.000951 | 0.004466 |
| 112.9 | 100    | 59.6039  | 23859 | 55 | 8.04E-05 | 0.000951 | 0.004238 |
| 4     | 100    | 66.8066  | 24349 | 30 | 0.047629 | 0.001022 | 0.005213 |
| 44.3  | 100    | 28.1983  | 9068  | 43 | 0.000865 | 0.001022 | 0.005336 |
| 5.8   | 100    | 41.2289  | 15961 | 46 | 0.000511 | 0.001022 | 0.005437 |
| 18    | 100    | 69.1216  | 25531 | 38 | 0.004038 | 0.001022 | 0.005077 |
| 38.1  | 49.685 | 116.5894 | 42544 | 39 | 0.005664 | 0.001022 | 0.005372 |
| 129.8 | 2.607  | 77.7777  | 29298 | 54 | 0.000112 | 0.001022 | 0.005804 |
| 30.1  | 24.487 | 81.113   | 33034 | 39 | 0.005805 | 0.001022 | 0.005606 |
| 120   | 82.987 | 124.2436 | 47102 | 43 | 0.001673 | 0.001022 | 0.005237 |
| 26.2  | 100    | 25.6302  | 9537  | 38 | 0.006125 | 0.001022 | 0.004669 |
| 19.3  | 100    | 53.3829  | 19438 | 32 | 0.025431 | 0.001022 | 0.005793 |
| 24.3  | 100    | 41.6871  | 13124 | 45 | 0.000895 | 0.001022 | 0.005562 |
| 46.7  | 100    | 59.2186  | 21693 | 35 | 0.012199 | 0.001022 | 0.005795 |
| 5     | 100    | 94.9982  | 35833 | 30 | 0.035144 | 0.001022 | 0.005156 |
| 1.4   | 100    | 106.9466 | 40969 | 26 | 0.064459 | 0.001022 | 0.005531 |
| 6.5   | 100    | 33.7903  | 12874 | 34 | 0.018318 | 0.001022 | 0.004811 |
| 1.5   | 100    | 78.7437  | 27256 | 29 | 0.061561 | 0.001022 | 0.004875 |
| 36.6  | 100    | 44.7373  | 15513 | 29 | 0.038631 | 0.001022 | 0.005489 |
| 4.9   | 100    | 37.1479  | 11510 | 26 | 0.059483 | 0.001022 | 0.004729 |
| 20.6  | 100    | 63.0718  | 21121 | 29 | 0.058213 | 0.001022 | 0.005027 |
| 14.4  | 100    | 47.106   | 16884 | 39 | 0.002299 | 0.001022 | 0.00499  |
| 0.6   | 100    | 134.8954 | 52563 | 39 | 0.004989 | 0.001022 | 0.005587 |
| 27.9  | 100    | 17.0004  | 4742  | 24 | 0.129456 | 0.001022 | 0.005745 |
| 75    | 100    | 41.6429  | 14664 | 27 | 0.073236 | 0.001022 | 0.005467 |
| 227.6 | 46.795 | 16.9803  | 5282  | 27 | 0.062123 | 0.001022 | 0.004913 |
| 53.9  | 100    | 16.9825  | 5283  | 39 | 0.00363  | 0.001114 | 0.006237 |
| 86    | 100    | 23.6821  | 8686  | 26 | 0.090332 | 0.001114 | 0.005943 |
| 6.6   | 100    | 74.0752  | 27447 | 35 | 0.01177  | 0.001114 | 0.006201 |
| 5     | 100    | 17.6559  | 5114  | 46 | 0.000955 | 0.001114 | 0.005991 |
| 4.5   | 100    | 54.8342  | 20014 | 32 | 0.024701 | 0.001114 | 0.00592  |
| 30.4  | 100    | 48.2048  | 15510 | 27 | 0.058605 | 0.001114 | 0.005891 |
| 31.7  | 100    | 28.4369  | 9167  | 50 | 0.000347 | 0.001114 | 0.005921 |
| 1.5   | 100    | 112.7618 | 40925 | 20 | 0.30122  | 0.001114 | 0.006306 |
| 17.8  | 100    | 54.6124  | 19436 | 38 | 0.004582 | 0.001114 | 0.006131 |
| 235.4 | 18.509 | 88.6707  | 31211 | 64 | 9.74E-06 | 0.001114 | 0.005944 |
| 16.1  | 100    | 55.7904  | 19898 | 42 | 0.001996 | 0.001114 | 0.006331 |

|       |        |          |       |    |          |          |          |
|-------|--------|----------|-------|----|----------|----------|----------|
| 6.7   | 100    | 57.7592  | 20668 | 43 | 0.001588 | 0.001114 | 0.00609  |
| 37.5  | 100    | 38.5329  | 13233 | 18 | 0.658212 | 0.001114 | 0.006381 |
| 83.8  | 100    | 66.1582  | 22620 | 58 | 1.28E-05 | 0.001114 | 0.006437 |
| 10.5  | 100    | 83.4298  | 31004 | 26 | 0.093905 | 0.001114 | 0.006399 |
| 2.1   | 100    | 88.5528  | 33038 | 39 | 0.004437 | 0.001114 | 0.006041 |
| 57.1  | 100    | 37.8805  | 11785 | 39 | 0.004763 | 0.001114 | 0.006041 |
| 3.8   | 100    | 86.9232  | 35507 | 34 | 0.01862  | 0.001114 | 0.006326 |
| 123.2 | 4.279  | 81.2945  | 30202 | 56 | 7.09E-05 | 0.001114 | 0.006321 |
| 0.3   | 100    | 81.7088  | 30355 | 25 | 0.143313 | 0.001114 | 0.006431 |
| 38.2  | 54.671 | 88.8639  | 32128 | 54 | 0.000109 | 0.00121  | 0.006728 |
| 4.2   | 54.386 | 140.5661 | 54174 | 23 | 0.099874 | 0.00121  | 0.006616 |
| 13.8  | 100    | 140.2593 | 55087 | 16 | 1.163489 | 0.00121  | 0.006777 |
| 21.8  | 100    | 67.0401  | 27060 | 40 | 0.004423 | 0.00121  | 0.006673 |
| 3.4   | 100    | 93.9931  | 35402 | 28 | 0.055221 | 0.00121  | 0.006869 |
| 17.1  | 51.865 | 116.6357 | 42567 | 34 | 0.018166 | 0.001308 | 0.007102 |
| 0     | 100    | 41.8137  | 16209 | 28 | 0.038133 | 0.001308 | 0.007143 |
| 69.3  | 100    | 28.8858  | 9582  | 34 | 0.012594 | 0.001308 | 0.007154 |
| 15.7  | 100    | 65.1783  | 23966 | 41 | 0.002956 | 0.001308 | 0.006917 |
| 4.9   | 100    | 95.5031  | 36049 | 22 | 0.23626  | 0.001308 | 0.006899 |
| 13.4  | 100    | 61.3848  | 22563 | 20 | 0.404529 | 0.001308 | 0.007077 |
| 1.5   | 100    | 139.8557 | 51959 | 21 | 0.321296 | 0.001308 | 0.006888 |
| 17.3  | 100    | 17.5738  | 5273  | 36 | 0.006896 | 0.001308 | 0.006993 |
| 19.9  | 100    | 76.7672  | 28888 | 41 | 0.00245  | 0.00141  | 0.007383 |
| 15.9  | 100    | 78.8789  | 29488 | 47 | 0.000697 | 0.00141  | 0.007409 |
| 5.1   | 100    | 75.0332  | 27816 | 40 | 0.004243 | 0.00141  | 0.00737  |
| 91.2  | 100    | 47.1159  | 16888 | 39 | 0.003377 | 0.00141  | 0.007325 |
| 13.7  | 100    | 94.2814  | 34353 | 30 | 0.033254 | 0.00141  | 0.007453 |
| 2     | 100    | 76.8309  | 28643 | 33 | 0.005215 | 0.001498 | 0.007799 |
| 5.5   | 100    | 29.6406  | 8987  | 23 | 0.240416 | 0.001498 | 0.007807 |
| 61.4  | 100    | 41.4268  | 14304 | 22 | 0.110681 | 0.001498 | 0.007875 |
| 6     | 100    | 27.1249  | 8174  | 27 | 0.0612   | 0.001498 | 0.007828 |
| 68.2  | 100    | 60.1444  | 24095 | 52 | 0.000267 | 0.001498 | 0.007556 |
| 3.1   | 100    | 68.9936  | 25243 | 54 | 4.41E-05 | 0.001498 | 0.007911 |
| 36.4  | 100    | 51.3813  | 16695 | 11 | 3.183438 | 0.001498 | 0.00764  |
| 3.6   | 100    | 129.9717 | 50658 | 35 | 0.008555 | 0.001576 | 0.008695 |
| 5.3   | 100    | 78.0551  | 28932 | 30 | 0.043482 | 0.001576 | 0.008849 |
| 92    | 94.01  | 68.7106  | 25660 | 29 | 0.044308 | 0.001576 | 0.008436 |
| 22.6  | 100    | 101.8536 | 36451 | 29 | 0.055255 | 0.001576 | 0.008563 |
| 15.6  | 100    | 118.0204 | 44373 | 38 | 0.005479 | 0.001576 | 0.008668 |
| 13.6  | 100    | 36.2091  | 11172 | 28 | 0.055883 | 0.001576 | 0.008066 |
| 15.1  | 100    | 85.5239  | 30740 | 31 | 0.015866 | 0.001576 | 0.008514 |
| 37.3  | 100    | 24.4341  | 7942  | 19 | 0.366134 | 0.001576 | 0.00828  |
| 88    | 15.778 | 59.7223  | 21874 | 35 | 0.010703 | 0.001576 | 0.008387 |
| 55.5  | 100    | 66.7535  | 22872 | 11 | 3.040222 | 0.001576 | 0.008226 |
| 60.6  | 100    | 44.6919  | 16048 | 36 | 0.009652 | 0.001576 | 0.008739 |
| 8.7   | 100    | 59.5741  | 21388 | 29 | 0.05134  | 0.001576 | 0.00875  |
| 31.1  | 100    | 16.8753  | 4961  | 38 | 0.004711 | 0.001758 | 0.009308 |
| 17.6  | 100    | 36.2253  | 11178 | 26 | 0.085733 | 0.001758 | 0.009431 |
| 5.2   | 100    | 52.3927  | 17174 | 27 | 0.027566 | 0.001758 | 0.00962  |
| 7.4   | 100    | 109.4478 | 40715 | 30 | 0.006612 | 0.001758 | 0.009352 |
| 27.4  | 100    | 68.8722  | 27873 | 33 | 0.025276 | 0.001758 | 0.009405 |
| 0     | 100    | 136.6153 | 50637 | 48 | 0.00052  | 0.001758 | 0.009582 |

|       |        |          |       |    |          |          |          |
|-------|--------|----------|-------|----|----------|----------|----------|
| 0     | 100    | 76.2804  | 26304 | 58 | 3.06E-05 | 0.001854 | 0.009889 |
| 41.4  | 100    | 96.3759  | 35245 | 48 | 0.000158 | 0.001854 | 0.009789 |
| 13.8  | 100    | 68.4697  | 25259 | 32 | 0.018964 | 0.001854 | 0.009688 |
| 33.8  | 100    | 40.7869  | 14549 | 20 | 0.386167 | 0.001945 | 0.009968 |
| 17.2  | 100    | 22.6036  | 6709  | 54 | 0.000124 | 0.001945 | 0.009929 |
| 51.1  | 100    | 21.456   | 6880  | 37 | 0.003367 | 0.001945 | 0.0102   |
| 12.9  | 100    | 41.6209  | 14653 | 32 | 0.025217 | 0.002012 | 0.01068  |
| 1.9   | 100    | 88.6301  | 33238 | 14 | 1.930351 | 0.002012 | 0.01029  |
| 28.1  | 100    | 139.53   | 53674 | 30 | 0.036624 | 0.002012 | 0.01033  |
| 0.4   | 100    | 131.8866 | 51438 | 19 | 0.564588 | 0.002012 | 0.01126  |
| 69.5  | 100    | 22.1435  | 8025  | 36 | 0.009729 | 0.002012 | 0.01091  |
| 69.5  | 100    | 22.1435  | 8025  | 36 | 0.009729 | 0.002012 | 0.01091  |
| 6.5   | 100    | 99.1416  | 36410 | 26 | 0.117953 | 0.002012 | 0.01124  |
| 38.8  | 100    | 17.6948  | 5965  | 46 | 0.000865 | 0.002012 | 0.01057  |
| 8.3   | 100    | 33.5629  | 11625 | 51 | 0.000251 | 0.002012 | 0.01093  |
| 14.5  | 100    | 45.138   | 15671 | 35 | 0.013328 | 0.002012 | 0.01026  |
| 144.7 | 56.123 | 60.1055  | 24076 | 56 | 6.38E-05 | 0.002012 | 0.01044  |
| 42.5  | 100    | 71.7634  | 24922 | 43 | 0.000174 | 0.002012 | 0.0105   |
| 102.2 | 100    | 13.9735  | 3909  | 26 | 0.058311 | 0.002012 | 0.01046  |
| 38.8  | 100    | 49.6167  | 19589 | 37 | 0.005766 | 0.002012 | 0.01047  |
| 1.5   | 100    | 138.8826 | 51514 | 23 | 0.197904 | 0.002012 | 0.01081  |
| 44.2  | 100    | 65.6526  | 22409 | 44 | 0.000205 | 0.002079 | 0.01216  |
| 22.6  | 100    | 57.6328  | 19216 | 23 | 0.216729 | 0.002079 | 0.01229  |
| 12.2  | 100    | 42.308   | 14925 | 36 | 0.011092 | 0.002079 | 0.01169  |
| 30.3  | 95.831 | 52.023   | 20636 | 42 | 0.001624 | 0.002079 | 0.01189  |
| 0.4   | 100    | 130.8779 | 51025 | 14 | 1.54087  | 0.002079 | 0.01161  |
| 234.4 | 90.111 | 47.1411  | 16467 | 6  | 3.493165 | 0.002079 | 0.01155  |
| 214.8 | 73.284 | 124.7547 | 47303 | 49 | 0.000438 | 0.002257 | 0.01294  |
| 145.3 | 100    | 20.9541  | 6706  | 41 | 0.001206 | 0.002257 | 0.01261  |
| 41.9  | 100    | 36.6987  | 13058 | 65 | 8.06E-06 | 0.002257 | 0.0127   |
| 13.2  | 100    | 64.2638  | 23301 | 17 | 0.829793 | 0.002257 | 0.01252  |
| 6.9   | 100    | 36.5362  | 12463 | 23 | 0.225644 | 0.002257 | 0.01247  |
| 4.9   | 100    | 62.9413  | 22781 | 24 | 0.183575 | 0.002257 | 0.01284  |
| 29.1  | 100    | 16.9063  | 4835  | 27 | 0.055346 | 0.002257 | 0.01261  |
| 15.1  | 100    | 33.2364  | 11222 | 47 | 0.000411 | 0.002257 | 0.01277  |
| 11.9  | 100    | 43.3195  | 15347 | 43 | 0.002051 | 0.002315 | 0.01353  |
| 26.8  | 100    | 59.9103  | 23996 | 32 | 0.020037 | 0.002315 | 0.01398  |
| 0     | 9.94   | 141.2774 | 52700 | 31 | 0.011568 | 0.002315 | 0.01361  |
| 11.3  | 100    | 49.2226  | 17710 | 49 | 0.000524 | 0.002315 | 0.01306  |
| 40.2  | 100    | 51.8559  | 18846 | 37 | 0.005219 | 0.002315 | 0.01365  |
| 21.1  | 100    | 55.031   | 20098 | 23 | 0.185131 | 0.002315 | 0.0131   |
| 7.3   | 100    | 105.2291 | 40245 | 30 | 0.035854 | 0.002315 | 0.01358  |
| 5.2   | 100    | 104.3669 | 40422 | 27 | 0.060456 | 0.002315 | 0.01357  |
| 229.1 | 100    | 20.0848  | 6295  | 16 | 0.298345 | 0.002315 | 0.01381  |
| 14.2  | 100    | 49.7943  | 17525 | 17 | 0.740044 | 0.002315 | 0.01387  |
| 75.8  | 100    | 46.287   | 16081 | 38 | 0.00476  | 0.002315 | 0.01351  |
| 32.1  | 100    | 45.1092  | 15661 | 28 | 0.0523   | 0.002315 | 0.01342  |
| 16.6  | 100    | 54.07    | 19214 | 34 | 0.013771 | 0.002315 | 0.01376  |
| 2.9   | 100    | 94.6489  | 33608 | 16 | 1.059229 | 0.002315 | 0.0133   |
| 57.9  | 100    | 29.1996  | 9713  | 42 | 0.001136 | 0.002315 | 0.01356  |
| 14.8  | 100    | 92.7676  | 34649 | 25 | 0.106797 | 0.002315 | 0.0138   |
| 29.9  | 100    | 14.1768  | 3906  | 22 | 0.147117 | 0.002315 | 0.01358  |

|       |        |          |       |    |          |          |         |
|-------|--------|----------|-------|----|----------|----------|---------|
| 10.7  | 100    | 77.3659  | 28618 | 17 | 0.860316 | 0.002376 | 0.01471 |
| 3.5   | 100    | 100.3653 | 37704 | 35 | 0.007829 | 0.002376 | 0.01537 |
| 26.3  | 100    | 37.624   | 12887 | 18 | 0.364197 | 0.002376 | 0.01424 |
| 10.3  | 100    | 79.0617  | 29327 | 42 | 0.002391 | 0.002376 | 0.01496 |
| 13.4  | 100    | 116.1322 | 42346 | 21 | 0.350424 | 0.002376 | 0.01512 |
| 1.5   | 92.589 | 77.22    | 29064 | 52 | 4.34E-05 | 0.002376 | 0.01483 |
| 4.8   | 100    | 69.2221  | 25776 | 45 | 0.000361 | 0.002376 | 0.01509 |
| 30.7  | 100    | 31.1099  | 11753 | 19 | 0.384602 | 0.002376 | 0.01517 |
| 57.9  | 100    | 40.8345  | 13914 | 24 | 0.183575 | 0.002543 | 0.01615 |
| 1.8   | 100    | 97.111   | 34579 | 24 | 0.153924 | 0.002543 | 0.01611 |
| 57.9  | 100    | 40.8345  | 13914 | 24 | 0.183575 | 0.002543 | 0.01615 |
| 21.8  | 100    | 17.572   | 4949  | 22 | 0.192997 | 0.002543 | 0.01623 |
| 2     | 100    | 110.3016 | 42373 | 25 | 0.113425 | 0.002719 | 0.01643 |
| 7.1   | 100    | 86.8453  | 32338 | 29 | 0.031327 | 0.002719 | 0.01665 |
| 9.8   | 100    | 33.3882  | 11280 | 41 | 0.002928 | 0.002777 | 0.01821 |
| 20.3  | 100    | 38.2038  | 11880 | 20 | 0.392433 | 0.002777 | 0.01799 |
| 36.9  | 100    | 31.9119  | 12104 | 29 | 0.034731 | 0.002777 | 0.01805 |
| 3.3   | 100    | 80.2893  | 29793 | 24 | 0.154753 | 0.002777 | 0.01804 |
| 47.5  | 100    | 64.775   | 23513 | 5  | 12.57402 | 0.002777 | 0.01747 |
| 8.1   | 100    | 55.7447  | 18355 | 30 | 0.043492 | 0.002777 | 0.01802 |
| 1.7   | 100    | 109.8839 | 42193 | 24 | 0.149349 | 0.002777 | 0.0172  |
| 2.8   | 100    | 119.2191 | 46107 | 27 | 0.078791 | 0.002843 | 0.0189  |
| 0     | 100    | 125.6035 | 48828 | 35 | 0.008863 | 0.002843 | 0.0192  |
| 2.5   | 100    | 73.4941  | 27510 | 39 | 0.000522 | 0.002843 | 0.01862 |
| 0     | 100    | 97.8045  | 37014 | 27 | 0.083839 | 0.002843 | 0.0185  |
| 12.2  | 100    | 80.608   | 32833 | 34 | 0.016737 | 0.002843 | 0.01831 |
| 14.9  | 100    | 54.1028  | 19227 | 30 | 0.027156 | 0.002843 | 0.01879 |
| 37.2  | 100    | 47.8545  | 18807 | 43 | 0.000999 | 0.002843 | 0.01867 |
| 29.2  | 100    | 65.6574  | 22134 | 24 | 0.18116  | 0.002843 | 0.01846 |
| 14.3  | 100    | 87.0792  | 32552 | 28 | 0.030821 | 0.002931 | 0.01946 |
| 7.9   | 100    | 75.0814  | 27835 | 23 | 0.216568 | 0.00302  | 0.01963 |
| 86.5  | 100    | 16.8467  | 4948  | 23 | 0.145587 | 0.003096 | 0.01971 |
| 42    | 100    | 93.2412  | 34846 | 36 | 0.011394 | 0.003096 | 0.01988 |
| 7.6   | 100    | 85.6837  | 29968 | 17 | 0.8677   | 0.003096 | 0.02023 |
| 11.3  | 100    | 78.1368  | 28703 | 27 | 0.018371 | 0.003096 | 0.01995 |
| 6.3   | 100    | 69.0484  | 25230 | 21 | 0.184686 | 0.003096 | 0.01986 |
| 8.3   | 100    | 63.2926  | 23248 | 31 | 0.035974 | 0.003096 | 0.02021 |
| 2.9   | 100    | 90.3234  | 33937 | 22 | 0.168809 | 0.003096 | 0.02027 |
| 119.9 | 40.351 | 83.2518  | 33911 | 29 | 0.040243 | 0.003096 | 0.02016 |
| 0     | 100    | 64.41    | 23365 | 16 | 1.32464  | 0.003096 | 0.02001 |
| 70.4  | 100    | 25.3752  | 7996  | 23 | 0.116055 | 0.003096 | 0.02022 |
| 224.2 | 2.643  | 28.2264  | 9312  | 56 | 5.27E-05 | 0.003178 | 0.0204  |
| 2.6   | 100    | 94.9268  | 33708 | 21 | 0.31513  | 0.003254 | 0.02108 |
| 11.5  | 100    | 67.0935  | 24705 | 25 | 0.12108  | 0.003254 | 0.02126 |
| 1.9   | 100    | 134.8452 | 52545 | 28 | 0.027959 | 0.003254 | 0.021   |
| 48.8  | 100    | 37.3827  | 12795 | 14 | 0.883763 | 0.003254 | 0.02102 |
| 159.9 | 48.45  | 91.873   | 34562 | 39 | 0.005307 | 0.00337  | 0.02368 |
| 12    | 100    | 27.0263  | 8140  | 42 | 0.000957 | 0.00337  | 0.02331 |
| 13.7  | 100    | 17.5619  | 4945  | 30 | 0.032822 | 0.00337  | 0.02348 |
| 6.2   | 100    | 62.6725  | 20968 | 36 | 0.012015 | 0.00337  | 0.02278 |
| 23.3  | 100    | 46.9089  | 16327 | 40 | 0.003382 | 0.00337  | 0.02285 |
| 1.9   | 100    | 130.7197 | 50961 | 25 | 0.106497 | 0.00337  | 0.02376 |

|       |        |          |       |    |          |          |         |
|-------|--------|----------|-------|----|----------|----------|---------|
| 3.2   | 100    | 106.907  | 40953 | 20 | 0.22281  | 0.00337  | 0.02183 |
| 140.3 | 100    | 25.7267  | 8875  | 42 | 0.00031  | 0.00337  | 0.02272 |
| 9.8   | 100    | 137.3192 | 50790 | 35 | 0.012887 | 0.00337  | 0.02216 |
| 35.2  | 100    | 21.6742  | 6672  | 39 | 0.002136 | 0.00337  | 0.02398 |
| 8.2   | 100    | 129.6993 | 49425 | 24 | 0.107539 | 0.00337  | 0.02167 |
| 5     | 100    | 121.2995 | 45817 | 18 | 0.655276 | 0.00337  | 0.02379 |
| 167.8 | 100    | 19.0289  | 6632  | 19 | 0.431006 | 0.00337  | 0.0233  |
| 2     | 100    | 99.4151  | 35466 | 46 | 0.000222 | 0.00337  | 0.02303 |
| 15.4  | 100    | 66.7677  | 24331 | 20 | 0.384347 | 0.00337  | 0.02199 |
| 36.2  | 100    | 21.2969  | 6641  | 38 | 0.002615 | 0.00337  | 0.02357 |
| 27.6  | 100    | 81.5489  | 30301 | 33 | 0.023268 | 0.00337  | 0.02422 |
| 14.5  | 100    | 69.5035  | 25947 | 27 | 0.058229 | 0.00337  | 0.0222  |
| 13.3  | 100    | 15.4821  | 4340  | 38 | 0.007268 | 0.003456 | 0.02434 |
| 84.1  | 6.68   | 52.6849  | 19164 | 47 | 0.000539 | 0.003533 | 0.02456 |
| 0     | 100    | 129.9695 | 50657 | 20 | 0.303269 | 0.003533 | 0.0244  |
| 126.6 | 16.012 | 52.7732  | 20970 | 33 | 0.008852 | 0.003674 | 0.02652 |
| 61.1  | 100    | 24.7753  | 8521  | 27 | 0.073778 | 0.003674 | 0.02533 |
| 10.2  | 100    | 37.3796  | 11620 | 29 | 0.03763  | 0.003674 | 0.02575 |
| 221.8 | 100    | 16.2706  | 5233  | 13 | 1.694162 | 0.003674 | 0.02626 |
| 3.3   | 100    | 51.477   | 16732 | 27 | 0.071804 | 0.003674 | 0.02499 |
| 53.5  | 100    | 42.3242  | 14932 | 31 | 0.03639  | 0.003674 | 0.02518 |
| 10.1  | 100    | 17.5813  | 5084  | 31 | 0.026454 | 0.003674 | 0.02659 |
| 26.8  | 100    | 44.3875  | 15782 | 29 | 0.060003 | 0.003674 | 0.02645 |
| 26.8  | 100    | 44.3875  | 15782 | 29 | 0.060003 | 0.003674 | 0.02645 |
| 36.9  | 100    | 37.0747  | 11519 | 18 | 0.549323 | 0.003736 | 0.02717 |
| 5.9   | 100    | 103.6363 | 39580 | 24 | 0.107137 | 0.003736 | 0.02732 |
| 9     | 100    | 92.7884  | 32882 | 34 | 0.01409  | 0.003892 | 0.02844 |
| 67.6  | 100    | 88.1649  | 31004 | 40 | 0.002295 | 0.003892 | 0.02851 |
| 6.8   | 100    | 107.5929 | 41257 | 19 | 0.345071 | 0.003892 | 0.02811 |
| 11.3  | 100    | 109.7073 | 39702 | 40 | 0.003016 | 0.003892 | 0.02805 |
| 3.3   | 100    | 78.8115  | 29733 | 23 | 0.185707 | 0.003967 | 0.02877 |
| 46.3  | 100    | 25.3476  | 7984  | 20 | 0.26061  | 0.003967 | 0.02893 |
| 59.9  | 72.33  | 93.7435  | 35054 | 38 | 0.006011 | 0.004049 | 0.02918 |
| 42.8  | 100    | 71.0721  | 26213 | 19 | 0.564806 | 0.004124 | 0.02956 |
| 58.6  | 100    | 17.6761  | 5620  | 22 | 0.180213 | 0.004192 | 0.0301  |
| 91.4  | 100    | 24.3494  | 7812  | 10 | 3.548738 | 0.004192 | 0.02994 |
| 367.8 | 89.648 | 16.8592  | 5509  | 21 | 0.263788 | 0.004192 | 0.03019 |
| 27.1  | 100    | 55.8312  | 18384 | 31 | 0.031561 | 0.004266 | 0.031   |
| 2.6   | 100    | 114.9467 | 41843 | 18 | 0.552496 | 0.004344 | 0.03144 |
| 26    | 100    | 37.1599  | 11515 | 7  | 4.207924 | 0.004344 | 0.03126 |
| 14.1  | 100    | 88.4394  | 32995 | 27 | 0.044185 | 0.004424 | 0.03174 |
| 0.7   | 100    | 83.811   | 31577 | 21 | 0.177704 | 0.004581 | 0.03245 |
| 13.2  | 100    | 65.9587  | 23992 | 21 | 0.406967 | 0.004643 | 0.03289 |
| 11.4  | 100    | 52.1649  | 18455 | 27 | 0.062597 | 0.004643 | 0.0332  |
| 3.7   | 100    | 116.0848 | 42325 | 24 | 0.154614 | 0.004803 | 0.03385 |
| 0.3   | 100    | 130.6658 | 48537 | 24 | 0.168651 | 0.004803 | 0.03415 |
| 10.7  | 100    | 17.0517  | 4891  | 27 | 0.082692 | 0.00496  | 0.03434 |
| 10.7  | 100    | 17.0517  | 4891  | 27 | 0.082692 | 0.00496  | 0.03434 |
| 16.3  | 100    | 61.6693  | 24786 | 18 | 0.67997  | 0.005031 | 0.03487 |
| 32.6  | 100    | 37.5265  | 12853 | 13 | 1.810364 | 0.005031 | 0.0349  |
| 2.7   | 100    | 66.2999  | 24134 | 16 | 1.02321  | 0.005271 | 0.03576 |
| 3.5   | 100    | 86.3623  | 32137 | 22 | 0.178049 | 0.005271 | 0.03576 |



|       |        |          |       |    |          |          |         |
|-------|--------|----------|-------|----|----------|----------|---------|
| 62    | 100    | 45.7814  | 15872 | 32 | 0.014283 | 0.005325 | 0.03651 |
| 8.7   | 100    | 48.353   | 16948 | 25 | 0.118573 | 0.005325 | 0.0366  |
| 38.4  | 100    | 41.7267  | 14696 | 33 | 0.014531 | 0.005618 | 0.03866 |
| 34.4  | 100    | 28.7613  | 9529  | 38 | 0.005286 | 0.00573  | 0.04028 |
| 1.3   | 100    | 88.5662  | 33043 | 21 | 0.175127 | 0.00573  | 0.04077 |
| 65.6  | 100    | 67.7473  | 24813 | 35 | 0.013069 | 0.00573  | 0.03997 |
| 117.6 | 100    | 39.5862  | 13832 | 26 | 0.107422 | 0.00573  | 0.04035 |
| 3.4   | 100    | 48.9441  | 15777 | 18 | 0.599649 | 0.00573  | 0.04064 |
| 27.7  | 100    | 52.0503  | 18836 | 19 | 0.478657 | 0.005792 | 0.04266 |
| 98    | 100    | 27.6983  | 8895  | 30 | 0.019016 | 0.00599  | 0.04435 |
| 194.1 | 28.286 | 13.996   | 4061  | 27 | 0.052506 | 0.00599  | 0.04414 |
| 12.8  | 100    | 88.4611  | 31972 | 30 | 0.024074 | 0.006145 | 0.04568 |
| 21.2  | 100    | 27.9193  | 9190  | 37 | 0.005951 | 0.006428 | 0.0476  |
| 3.1   | 100    | 113.7406 | 41336 | 14 | 1.408769 | 0.006721 | 0.04928 |
| 10.7  | 100    | 29.2992  | 10220 | 28 | 0.048287 | 0.006721 | 0.04943 |
| 2.7   | 100    | 106.9198 | 41469 | 11 | 1.640829 | 0.006926 | 0.05103 |
| 7.2   | 100    | 67.8865  | 27446 | 28 | 0.041585 | 0.006991 | 0.05159 |
| 5     | 100    | 26.1051  | 8564  | 14 | 1.554062 | 0.00728  | 0.05321 |
| 21.1  | 100    | 20.9918  | 6637  | 38 | 0.001355 | 0.007423 | 0.05355 |
| 19    | 100    | 59.0757  | 21192 | 27 | 0.070482 | 0.007636 | 0.05477 |
| 0.3   | 100    | 40.2976  | 15578 | 22 | 0.160669 | 0.00822  | 0.06157 |
| 1.7   | 100    | 77.4435  | 28885 | 27 | 0.078093 | 0.00822  | 0.06208 |
| 40.7  | 100    | 53.3702  | 17530 | 14 | 1.331075 | 0.00822  | 0.06134 |
| 11.2  | 100    | 62.6553  | 22996 | 28 | 0.051702 | 0.008361 | 0.0628  |
| 4.4   | 100    | 36.6568  | 11331 | 19 | 0.223782 | 0.008746 | 0.06648 |
| 4.4   | 100    | 36.6568  | 11331 | 19 | 0.223782 | 0.008746 | 0.06648 |
| 3     | 100    | 65.7857  | 23923 | 11 | 3.331049 | 0.008962 | 0.0673  |
| 16.6  | 100    | 90.8061  | 37131 | 17 | 0.590495 | 0.008997 | 0.06793 |
| 0.4   | 100    | 130.0701 | 53365 | 12 | 2.867165 | 0.009436 | 0.07123 |
| 7.9   | 100    | 39.4258  | 13767 | 26 | 0.106043 | 0.009436 | 0.07165 |
| 30.1  | 100    | 66.373   | 22407 | 29 | 0.026261 | 0.009498 | 0.07182 |
| 6.1   | 100    | 86.9796  | 32509 | 16 | 1.236335 | 0.009514 | 0.075   |
| 20.8  | 100    | 28.9451  | 9377  | 35 | 0.010572 | 0.009514 | 0.07317 |
| 22    | 100    | 59.6149  | 21407 | 27 | 0.077907 | 0.009514 | 0.07506 |
| 1.9   | 100    | 139.8442 | 51954 | 13 | 1.690167 | 0.009587 | 0.0765  |
| 3.3   | 100    | 77.8209  | 28828 | 23 | 0.172866 | 0.009655 | 0.07676 |
| 27.2  | 100    | 27.7118  | 9111  | 38 | 0.002582 | 0.009764 | 0.07859 |
| 3.8   | 100    | 68.4921  | 25055 | 35 | 0.005108 | 0.009818 | 0.07908 |
| 193.3 | 100    | 16.8697  | 5514  | 29 | 0.034565 | 0.009858 | 0.07986 |
| 2.6   | 100    | 133.0137 | 51949 | 12 | 2.553057 | 0.009858 | 0.08076 |

| Reporter Qu | pre-LVA-01 | pre-LVA-02 | post-LVA-01 | post-LVA-02 |
|-------------|------------|------------|-------------|-------------|
| 375627      | 173.5      | 272.8      | 49.2        | 50.6        |
| 428602      | 171        | 233.2      | 49.4        | 59.9        |
| 428597      | 42.7       | 66.6       | 10.9        | 9.8         |
| 428494      | 184.2      | 182.5      | 128.2       | 118.4       |
| 425265      | 6.6        | 7.7        | 2.7         | 3.2         |
| 309911      | 243        | 345.5      | 140.2       | 143.3       |
| 467748      | 68.7       | 92.2       | 23.4        | 24.5        |
| 467632      | 21.4       | 27.3       | 7.8         | 5.9         |
| 468416      | 46.1       | 60.2       | 10.3        | 12.6        |
| 375548      | 24         | 32.3       | 10.1        | 12.1        |
| 429078      | 30         | 44.2       | 12.6        | 12          |
| 375638      | 16.8       | 24         | 7           | 10.7        |
| 425235      | 44.4       | 49.7       | 45.8        | 62.1        |
| 463995      | 1.8        | 2.4        | 6.3         | 3.2         |
| 347982      | 9.7        | 20.7       | 6.8         | 11.9        |
| 386229      | 3.3        | 5.4        | 6.4         | 6.2         |
| 440082      | 11.3       | 6          | 13.9        | 9.1         |
| 440229      | 58.5       | 35.1       | 53.7        | 32.7        |
| 410469      | 2.7        | 2.3        | 3.4         | 3.1         |
| 410361      | 6.4        | 2.1        | 8.5         | 6.3         |
| 288169      | 39.7       | 18.8       | 38.4        | 16.5        |
| 288060      | 28         | 17         | 31.4        | 17.9        |
| 386129      | 9.6        | 8.8        | 10.1        | 15          |
| 386045      | 1.9        |            | 3.2         | 4.9         |
| 288071      | 33.2       | 21.7       | 38.9        | 23.7        |
| 396833      | 15.4       | 8.8        | 11.9        | 8           |
| 396754      | 13.5       | 10.3       | 13.4        | 12.3        |
| 396763      | 45.1       | 34         | 54.1        | 33.5        |
| 287945      | 5.7        | 5.5        | 9.2         | 5.9         |
| 439069      | 9.6        | 6.2        | 6.5         | 6.4         |
| 287402      | 24.1       | 23.9       | 23.9        | 26.1        |
| 287401      | 28.5       | 31.4       | 29.6        | 31.5        |
| 287280      | 11.1       | 14.1       | 13.3        | 16          |
| 290503      | 24.4       | 27.3       | 26.5        | 27.6        |
| 290512      | 22.7       | 24.8       | 21.2        | 19.4        |
| 290377      | 9.1        | 7.5        | 12.5        | 5.6         |
| 267192      | 5          | 3          | 1.9         | 5.7         |
| 370068      | 107.8      | 107.9      | 88.9        | 126.9       |
| 268726      | 1.5        |            | 1.9         |             |
| 370052      | 336.7      | 356        | 328.3       | 440.2       |
| 335087      | 155.2      | 227.2      | 216.6       | 243.7       |
| 268827      | 3          | 2.9        | 5.4         | 8.5         |
| 267102      | 6          | 3.2        | 1.9         | 2.1         |
| 335084      | 244.8      | 367.4      | 319.7       | 349.3       |
| 288779      | 22.7       | 22.9       | 19.1        | 17          |
| 423694      | 53.4       | 51.6       | 50.4        | 51.3        |
| 410574      | 12.2       | 9.1        | 6.5         | 10.8        |
| 410421      | 9.2        | 6.2        | 1.9         | 5.7         |
| 475207      | 358.5      | 236.9      | 107.2       | 234.2       |
| 410310      | 2          |            |             |             |
| 389253      | 2.5        | 1.4        |             | 1.3         |

|        |       |       |       |       |
|--------|-------|-------|-------|-------|
| 455367 | 23.8  | 20.9  | 27.5  | 25.5  |
|        |       |       |       |       |
| 317024 | 46    | 23.4  | 43.7  | 27.5  |
| 345003 | 18.8  | 13.2  | 20.3  | 16.6  |
| 451856 | 9.3   | 8.5   | 10.8  | 10.2  |
| 451891 | 35.1  | 24.2  | 22.5  | 31.7  |
| 451807 | 23.9  | 18.7  | 19.9  | 27.9  |
| 454575 | 21.7  | 17.8  | 15    | 19.5  |
| 314129 | 34.7  | 78.2  | 48.2  | 31.9  |
| 341010 | 15    | 19.4  | 15.3  | 22.6  |
| 340855 | 35.3  | 40    | 26    | 44.5  |
| 282668 | 24.5  | 27.2  | 40.3  | 39.1  |
| 347270 | 17.4  | 17.4  | 15.8  | 18.4  |
| 332394 | 1.7   | 3.1   | 2.3   | 1.6   |
| 338066 | 17.5  | 15.7  | 19    | 19.6  |
| 452408 | 23.2  | 20.4  | 15.2  | 23.9  |
| 453408 | 16.6  | 7     | 15.3  | 10.8  |
| 314536 | 25.1  | 18.3  | 17.4  | 25.1  |
| 314426 | 18.8  | 18.6  | 22.2  | 22.1  |
| 389142 | 16.5  | 12.5  | 10.9  | 11.7  |
| 393963 | 53.5  | 47.5  | 46.9  | 54.2  |
| 457758 | 43    | 58.1  | 39.1  | 48.9  |
| 344520 | 65.4  | 73.5  | 54    | 71.5  |
| 454222 | 7.3   | 5.8   | 16.9  | 13.4  |
| 457622 | 6.4   | 6.2   | 7.8   | 6.6   |
| 457607 | 10.8  | 22.2  | 19    | 21.1  |
| 380117 | 39.9  | 49.3  | 36    | 57.8  |
| 436449 | 3     | 3     | 3.1   | 3.4   |
| 410043 | 12.6  | 11.2  | 12.2  | 16    |
| 409917 | 2.3   | 3.1   | 2.2   | 2.5   |
| 380016 | 21.8  | 22.8  | 26.9  | 27.5  |
| 436554 | 2.4   | 5.4   | 2.1   | 3.1   |
| 410189 | 2.2   | 1.8   |       | 1.7   |
| 380154 | 5.6   | 7.3   | 7.5   | 7.4   |
| 370979 | 24.6  | 22.8  | 20.7  | 27.4  |
| 339396 | 25.9  | 23.1  | 24.5  | 27.2  |
| 335359 | 11.6  | 10.9  | 15.6  | 9.2   |
| 370646 | 324.6 | 430.2 | 171.1 | 110.5 |
| 411121 | 12.8  | 23.6  | 10.7  | 7.7   |
| 346562 | 106.9 | 110.3 | 100.5 | 133   |
| 347275 | 5.3   | 5.6   | 6.2   | 6.4   |
| 397645 | 123.6 | 134.1 | 124.6 | 134.3 |
| 452114 | 37.1  | 33.3  | 32.4  | 41.5  |
| 457816 | 18.2  | 14.1  | 17.5  | 19.5  |
| 461831 | 3.3   | 5.2   | 3.3   | 5.6   |
| 329200 |       | 5.4   | 2.2   | 2.4   |
| 434684 | 21.5  | 16.1  | 18.6  | 18.1  |
| 321009 | 11.7  | 7.5   | 11.6  | 10.9  |
| 371144 | 68.4  | 67.3  | 84.4  | 72    |
|        |       |       |       |       |
| 465796 | 2.8   | 6.2   | 3.1   | 7.5   |
| 468691 | 1.6   |       |       | 2.1   |

|        |       |       |       |       |
|--------|-------|-------|-------|-------|
| 313774 | 49.5  | 36.2  | 39.9  | 36.6  |
| 437559 | 6.2   | 4.8   | 5.9   | 1.9   |
| 449614 | 35    | 29.7  | 29.2  | 37.2  |
| 380600 | 15.7  | 12.3  | 15.6  | 16.2  |
| 289584 | 15.8  | 13.7  | 19.8  | 15    |
| 450491 | 19.7  | 16.3  | 15.6  | 17.4  |
| 289584 | 15.8  | 13.7  | 19.8  | 15    |
| 450491 | 19.7  | 16.3  | 15.6  | 17.4  |
| 309631 | 48.4  | 47.9  | 57    | 45.9  |
| 317125 | 14.2  | 11    | 13.6  | 12.2  |
| 324966 | 6.4   | 8     | 7     | 3.2   |
| 424780 | 17.7  | 17    | 15.2  | 12.6  |
| 313988 | 18.2  | 16.7  | 16.4  | 13.5  |
| 338751 | 34.7  | 23.9  | 25    | 24.9  |
| 340974 | 55.3  | 47.8  | 46.3  | 49.3  |
| 383729 |       |       |       | 1.7   |
| 435873 | 5.5   |       |       |       |
| 377557 | 68.8  | 67.7  | 67.7  | 69.8  |
| 372240 | 56.3  | 64.7  | 61.8  | 67.8  |
| 398954 | 35.4  | 42.6  | 36.2  | 38.7  |
| 454736 | 29.6  | 31.5  | 30.2  | 29.9  |
| 372978 | 31.9  | 18.8  | 19.1  | 18.6  |
| 335766 | 460.3 | 421.9 | 423.3 | 454.3 |
|        |       |       |       |       |
| 280095 | 45    | 49    | 42.5  | 47.9  |
| 460618 | 28.4  | 23.7  | 18.7  | 24.6  |
| 378986 | 12.2  | 13.8  | 16.1  | 13.9  |
| 345900 | 32.5  | 36.6  | 37.1  | 39.6  |
| 379433 | 12.2  | 14.4  | 16.7  | 15.9  |
| 453089 | 34.7  | 27.1  | 33.5  | 31.5  |
| 384343 | 5.5   | 2.2   | 3.3   | 5.1   |
| 384341 | 11.9  | 8.2   | 10.1  | 10.5  |
| 384175 | 42.5  | 25.1  | 33.6  | 29.7  |
| 384262 | 10.8  | 6.9   | 8.1   | 6.7   |
| 384173 | 49    | 33.5  | 42    | 36.2  |
| 451998 | 33.3  | 20.6  | 23.8  | 34.8  |
| 383109 |       | 5.8   | 7.1   | 7.7   |
| 384027 | 15.5  | 15.1  | 22.5  | 20.4  |
| 380537 | 40.2  | 25.9  | 28.5  | 30.5  |
| 380553 | 36.8  | 25.5  | 26.7  | 29.5  |
| 380577 | 12.8  | 6.7   | 9.6   | 8.4   |
| 380749 | 6.9   | 6.8   | 5.8   | 5.5   |
| 380652 | 27.9  | 24.2  | 22.5  | 28.3  |
| 379601 | 40.2  | 42.1  | 65.7  | 49.1  |
| 453214 | 41.6  | 43.6  | 57.7  | 44.7  |
| 379712 | 5.4   | 3.3   | 5     | 2.6   |
| 379691 | 89.8  | 66.7  | 84.8  | 68.9  |
| 382971 | 3.5   | 2.3   | 2.8   | 6.7   |
| 382947 | 3.1   | 9     | 9     | 16    |
| 382891 | 7.7   | 8.6   | 9     | 13.2  |
| 382864 | 6.2   | 6.8   | 7.7   | 12.3  |
| 383028 | 6.7   | 10.1  | 8.6   | 14.9  |

|        |       |       |       |       |
|--------|-------|-------|-------|-------|
| 452650 | 8.3   | 5.9   | 8.5   | 7.7   |
| 452651 | 2.4   |       |       |       |
| 381744 | 18.3  | 15.2  | 10.7  | 26.2  |
| 450044 | 2.3   | 1.6   | 8     | 6.1   |
| 395260 | 8     | 6.3   | 7.6   | 5.5   |
| 450158 | 31.7  | 16.5  | 23    | 15.8  |
| 395032 | 46.7  | 32.9  | 38.4  | 35.5  |
| 396173 | 15.2  | 12.5  | 14.5  | 16.7  |
| 397101 | 39.1  | 43    | 29.2  | 21.1  |
| 451040 | 12.6  | 9.1   | 11.2  | 13.2  |
| 451040 | 12.6  | 9.1   | 11.2  | 13.2  |
| 451124 | 18.8  | 17.9  | 18.4  | 25.6  |
| 451124 | 18.8  | 17.9  | 18.4  | 25.6  |
| 389307 | 8.6   | 7.8   | 10.2  | 9.3   |
| 393270 | 37.8  | 26.6  | 31.5  | 32.3  |
| 393222 | 43.9  | 32.1  | 36.4  | 33.1  |
| 390721 | 1.7   | 1.4   | 2.3   | 2     |
| 390660 | 25.2  | 23.5  | 26.3  | 19.1  |
|        |       |       |       |       |
| 360737 | 6.7   | 5.8   | 6     | 6.1   |
| 360719 | 6.1   | 6.3   | 6.2   | 2.8   |
| 360802 | 6.1   | 7.8   | 7.5   | 2.2   |
| 360829 | 8.8   | 7.6   | 7.7   | 8.9   |
| 361108 | 21    | 18.6  | 20.9  | 22    |
| 360964 | 7.4   | 3.3   | 5     | 6.1   |
| 360923 | 25.4  | 21.5  | 25.9  | 24.4  |
| 359180 | 2.3   | 6.3   | 2.3   | 2     |
| 359094 | 6.2   | 6.2   | 7.8   | 6.8   |
| 359014 | 6.8   | 5.5   | 8.8   | 6.7   |
| 358992 | 9.4   | 7.4   | 11.6  | 8.7   |
| 375723 | 23.1  | 20    | 20.8  | 24.9  |
| 375682 | 22.9  | 15.6  | 13.2  | 18.7  |
| 453469 | 24    | 18.6  | 28.8  | 20.9  |
| 378945 | 91.4  | 71.2  | 95.7  | 78.1  |
| 453323 | 119.8 | 119.9 | 185.1 | 115.2 |
| 453396 | 52.8  | 45.8  | 64.3  | 49.5  |
| 377299 | 21.8  | 20.8  | 20.1  | 22.3  |
| 453756 | 165.9 | 141.7 | 153.3 | 134.8 |
| 453763 | 54    | 38    | 53    | 42.9  |
| 377299 | 21.8  | 20.8  | 20.1  | 22.3  |
| 453611 | 71.1  | 76.4  | 107.1 | 86.1  |
| 455676 | 3.1   | 2.3   | 2     | 2.5   |
| 455819 | 12    | 10.3  | 11.1  | 14.7  |
| 369591 | 37.2  | 31.7  | 41    | 32.6  |
| 369586 | 121.4 | 109.1 | 124.3 | 104.6 |
| 367700 | 6.6   | 1.9   | 3.1   | 3.3   |
| 427920 | 94.4  | 85.1  | 117.6 | 108.4 |
| 430193 | 12    | 8     | 8.9   | 9.1   |
| 429606 | 2.3   | 3     | 2.8   | 2.2   |
| 429524 | 2.2   | 5.7   | 3     | 6.4   |
| 429517 | 2.1   | 3.1   | 1.9   | 1.6   |
| 429611 | 1.5   | 2.8   | 2.4   | 3.1   |

|        |       |      |       |      |
|--------|-------|------|-------|------|
| 429982 | 54.8  | 59.5 | 59.9  | 69.8 |
| 429968 | 54.9  | 56.8 | 65.6  | 69.2 |
| 429715 | 1.4   |      |       |      |
| 429709 | 16.6  | 13.3 | 12.8  | 12.4 |
| 424799 | 99.7  | 72.4 | 110.7 | 84.4 |
| 424775 | 91    | 79.5 | 114.5 | 76.5 |
| 424755 | 83    | 68.8 | 103.6 | 71.9 |
| 422344 | 81.8  | 50.4 | 87.1  | 52.1 |
| 422343 | 40.4  | 20.2 | 42.6  | 24.5 |
| 422315 | 41.3  |      | 58.4  | 61.4 |
| 422313 | 10.9  |      | 13.2  | 15.3 |
| 423640 | 26    | 17.5 | 25.6  | 26.5 |
| 425598 | 9.1   | 9.5  | 13.1  | 10.4 |
| 436528 | 84.7  | 55.3 | 75.8  | 64.9 |
| 434889 | 9     | 7.8  | 5.6   | 9.2  |
| 434772 | 76.1  | 95   | 55.5  | 99.9 |
| 435796 | 6.8   | 6    | 5.9   | 6.1  |
| 438742 | 2     | 1.7  | 1.6   |      |
| 434727 | 69.8  | 70.5 | 59.7  | 83.8 |
| 434723 | 53.1  | 52.2 | 58.4  | 64.4 |
| 442308 |       |      |       | 1.7  |
|        |       |      |       |      |
| 432433 | 40.3  | 33   | 39.8  | 48   |
| 432370 | 1.6   |      | 2.1   |      |
| 432342 | 2.3   | 2.6  | 3.3   | 2.8  |
| 442243 | 5.4   | 5.6  | 10.9  | 7    |
| 442130 | 12.6  | 13.2 | 18.7  | 11.6 |
| 432518 | 6.3   | 2.4  | 7.4   | 2.7  |
| 442205 | 23.5  | 11.8 | 20.3  | 14.9 |
| 431604 | 95    | 76.9 | 82.3  | 79   |
| 431584 | 9.6   | 10   | 9.9   | 9.2  |
| 431579 | 101.6 | 80.4 | 81.9  | 75.2 |
| 431540 | 18.9  | 16.5 | 13.5  | 31.8 |
| 431472 | 17.7  | 15.9 | 16.2  | 20.3 |
| 431455 | 14.2  | 10.9 | 11.7  | 10.3 |
| 431443 | 12.2  | 15.8 | 11.3  | 11.1 |
| 431425 | 2.1   | 2.4  |       | 2    |
| 431620 | 29.7  | 18.8 | 20.4  | 22.2 |
| 431635 | 30.2  | 17.9 | 11.6  | 17.2 |
| 431949 | 43.3  | 30.6 | 43.6  | 43.3 |
| 431775 | 27.4  | 19.1 | 23.2  | 20   |
| 431761 | 61.5  | 40.2 | 39.5  | 40.1 |
| 431725 | 96    | 73.5 | 74.7  | 66.6 |
| 431674 | 7.4   | 6.7  | 6     | 7.9  |
| 442087 | 6.8   | 9.7  | 13.4  | 8.3  |
| 434625 | 23    | 19.9 | 22.1  | 17.8 |
| 434617 | 5.2   | 3.2  | 2.5   | 2.4  |
| 434601 | 25.3  | 24.7 | 26.2  | 22   |
| 434524 | 40.4  | 36.4 | 45.8  | 36.3 |
| 434519 | 2.4   | 4.8  | 5.9   | 3.3  |
| 434499 | 40.4  | 38.9 | 40.5  | 42.2 |
| 434384 | 12.7  | 12.1 | 12.2  | 11.1 |

|        |      |      |      |      |
|--------|------|------|------|------|
| 433522 | 9.7  | 5.3  | 9.1  | 5.8  |
| 446876 | 29.2 | 27.1 | 33.5 | 22.4 |
| 446877 | 26.7 | 21.6 | 25.3 | 24.5 |
| 404690 | 12   | 9.9  | 15.3 | 11.1 |
| 404574 | 5.4  | 5.1  | 3.2  | 8    |
| 447974 | 32.4 | 23.9 | 31.8 | 29   |
| 404645 | 26.7 | 21.6 | 12.6 | 11.1 |
| 405421 | 44   | 37.3 | 42.3 | 40.3 |
| 405097 | 34.2 | 30.2 | 32.3 | 30.6 |
| 405010 | 51.4 | 48.8 | 63   | 49.2 |
| 446683 | 18.8 |      | 19.8 | 21.4 |
| 446689 | 13.4 |      | 20   | 24.2 |
| 446711 | 19.9 | 12.6 | 17.2 | 16.6 |
| 446654 | 15.1 | 11.1 | 15.4 | 13.2 |
| 446670 | 11.5 | 10   | 10.5 | 10.7 |
| 446788 | 12.5 | 7.6  | 9.1  | 9.2  |
| 407204 | 27.5 | 28   | 29   | 33.2 |
| 446718 | 6    | 2.1  | 5.8  | 2.8  |
| 446719 | 16.3 | 11.9 | 16.9 | 11.2 |
| 404055 | 2.8  | 3.2  | 11.7 | 6    |
| 400585 | 21.4 | 19   | 18.8 | 20.8 |
| 400719 | 15.1 | 13.8 | 15.8 | 17.8 |
| 448983 | 33.4 | 14.9 | 19.4 | 12.9 |
| 399562 | 64.5 | 41.9 | 45.1 | 52.1 |
| 399967 | 66.5 | 59.7 | 59   | 60.2 |
| 399855 | 37   | 37.9 | 38.4 | 38.3 |
| 399794 | 28.2 | 29.9 | 36   | 33.8 |
| 448030 | 25.9 | 25.4 | 41.1 | 34.4 |
| 403431 | 18.9 | 14.3 | 8.9  | 9.5  |
| 448303 | 12.2 | 9.3  | 13.3 | 18.2 |
| 422144 | 78.7 | 68.8 | 88.1 | 84.3 |
| 422134 | 22.9 | 25.8 | 37.3 | 29.1 |
| 411217 | 7.8  | 5.9  | 6.2  | 6.8  |
| 411210 | 31.4 | 20.5 | 29.3 | 25.7 |
| 409361 | 3    | 3.3  | 3.1  | 5.9  |
| 409129 | 31.7 | 28.2 | 36.2 | 30.1 |
| 409024 | 8.5  | 7.3  | 9.5  | 6.7  |
| 409246 | 23.1 | 15.4 | 16   | 15.9 |
| 413014 | 6.1  | 6    | 5.9  | 5.8  |
| 413001 | 32.3 | 27.6 | 35.5 | 30.4 |
| 412834 | 2.6  | 2    | 6.1  | 2.8  |
| 465995 | 19   | 20.7 | 27.3 | 25.8 |
| 474487 | 24.5 | 19.6 | 22   | 26.2 |
| 321047 | 79.3 | 55.6 | 71.5 | 62.1 |
| 467058 | 24.1 | 20.5 | 24.2 | 27.7 |
| 467062 | 6.8  | 2.9  | 3.3  | 6.2  |
| 322958 | 2.4  | 3.1  | 1.4  | 3.2  |
| 322838 | 25.7 | 19.8 | 15.2 | 19.3 |
| 322746 | 13.1 | 13.4 | 10.3 | 14.2 |
| 322707 | 25.2 | 22.2 | 18.9 | 20.5 |
| 466452 |      |      |      | 1.8  |
| 323068 | 6.6  | 7.4  | 5.5  | 5    |

|        |       |       |       |       |
|--------|-------|-------|-------|-------|
| 322595 | 15.9  | 11.2  | 16.5  | 11.2  |
| 322074 |       |       |       | 2.2   |
| 322558 | 10.9  | 10.2  | 8.7   | 10.4  |
| 322426 | 10.6  | 10.2  | 11.5  | 9.9   |
| 474887 | 143.8 | 152.1 | 206.7 | 185.7 |
| 332673 | 2.5   | 2.4   | 2.1   | 2.8   |
| 334078 | 127   | 102.2 | 109.1 | 126   |
| 464386 | 41.2  | 32.4  | 31.4  | 27.6  |
| 464396 | 5.8   | 2.6   | 2.3   | 4.5   |
|        |       |       |       |       |
| 474784 | 57.5  | 40.3  | 50.4  | 51.8  |
| 465129 | 27.9  | 19.1  | 24.7  | 20.5  |
| 472176 | 16.8  | 20.1  | 21.5  | 23.1  |
| 472145 |       | 1.3   | 3     | 5.3   |
| 472135 | 10    | 13.5  | 14.2  | 18.8  |
| 471428 | 2.1   | 2     | 2.6   | 2     |
| 312409 | 41.3  | 34.3  | 33.9  | 31.5  |
| 312316 | 30.6  | 13.6  | 12.4  | 16.8  |
| 312304 | 185.8 | 102.7 | 91.1  | 83.2  |
| 471521 | 5.9   | 5.2   | 2.9   | 5.4   |
| 468463 | 6.5   | 9.1   | 11.9  | 13.3  |
| 314763 | 32.1  | 26.9  | 34.3  | 32.1  |
| 467567 | 2.4   |       | 2.3   |       |
| 314905 | 38.1  | 31.9  | 33.8  | 33.4  |
| 314902 | 96    | 81.2  | 85.5  | 77.9  |
| 468445 | 43.3  | 44.1  | 49.8  | 54.3  |
| 315035 | 34.5  | 30    | 33    | 28    |
| 315691 | 17.1  | 12.7  | 15.2  | 14    |
| 464260 | 8.1   | 5.9   | 7.8   | 5.8   |
| 350794 | 147.9 | 81.3  | 107.5 | 80.8  |
| 265703 | 10.9  | 6.8   | 8.9   | 3.3   |
| 344860 | 8.3   | 10.9  | 22.7  | 89.1  |
| 267000 | 35.3  | 32.2  | 45.2  | 37.3  |
| 266871 | 65.4  | 58.3  | 79.7  | 67.9  |
| 475133 | 33.2  | 24.3  | 26.5  | 30.2  |
| 458179 | 3.2   | 1.7   |       |       |
| 266428 | 48.3  | 41.5  | 57.3  | 45.6  |
| 266514 | 46.7  | 50.4  | 60.3  | 55.8  |
| 343376 | 44.9  | 34.4  | 53    | 39.5  |
| 343773 | 212.7 | 165.2 | 174.2 | 183   |
| 343589 | 181.2 | 170.9 | 229.3 | 215   |
| 350642 | 15.2  | 11.5  | 24.1  | 16    |
| 266734 | 65.4  | 58.2  | 83.9  | 69.5  |
| 255229 | 16.5  | 11.8  | 16    | 16.7  |
| 255183 | 54.4  | 45.6  | 62.7  | 57.4  |
| 255129 | 50.5  | 44.2  | 62.6  | 54.1  |
| 348660 | 23.9  | 22.7  | 18.3  | 11.7  |
| 475422 | 21.9  | 20.1  | 31.1  | 18    |
| 475417 | 1.9   |       |       | 1.3   |
| 459873 | 48.5  | 41.9  | 52.9  | 51    |
| 459891 | 38.4  | 35.6  | 46.8  | 41.8  |
| 460005 | 12.3  | 12.5  | 12.3  | 12.3  |



|        |       |       |       |       |
|--------|-------|-------|-------|-------|
| 475326 | 86    | 88.9  | 102.7 | 113.3 |
| 475325 | 27    | 25.6  | 31.2  | 29.1  |
| 346845 | 10.9  | 8.1   | 7.7   | 8.2   |
| 475324 | 54.2  | 54.3  | 59.7  | 68    |
| 346711 | 39.5  | 29.2  | 28.1  | 31.8  |
| 347140 | 19.2  | 14.4  | 13.1  | 14.9  |
| 346983 | 14.6  | 11.9  | 9.5   | 12    |
| 475330 | 45    | 45.6  | 55.1  | 52    |
| 346438 | 71    | 61.8  | 68.7  | 65.2  |
| 346571 | 76.6  | 63.4  | 55.8  | 57    |
| 346550 | 231.7 | 155.9 | 190.2 | 170   |
| 339561 | 28.6  | 24.2  | 34.4  | 28.7  |
| 475007 | 30.7  | 29.4  | 46.8  | 42.3  |
| 474999 | 40.6  | 40.3  | 46.3  | 51.5  |
| 474979 | 326.2 | 292.8 | 355.4 | 341.8 |
| 474970 | 2.8   | 2     | 3.1   | 1.7   |
| 474992 | 10.5  | 10.4  | 11.4  | 12.5  |
| 351149 | 13.3  | 9.8   | 9.9   | 11.8  |
| 342027 | 45.9  | 39.7  | 30    | 36.1  |
| 475068 | 375   | 315.8 | 379.6 | 368.2 |
| 475054 | 22.8  | 22.5  | 30.8  | 31.1  |
| 475053 | 61.2  | 66    | 89.6  | 86.5  |
| 472056 |       | 2.1   | 2.5   | 5.7   |
| 280718 | 159   | 133.8 | 135.2 | 144.1 |
| 369755 | 276.2 | 217.3 | 222   | 249.2 |
| 375614 | 63.9  | 74.6  | 86.3  | 93    |
| 369203 | 207.3 | 170   | 189.1 | 153.8 |
| 369554 | 165.2 | 110.1 | 170.3 | 96.3  |
| 322460 | 8.5   | 1.5   | 6.4   | 6.5   |
| 434410 | 6.2   | 7.1   | 6.8   | 3.1   |
| 266616 | 93    | 76.8  | 113.2 | 86.5  |
| 334793 | 185.8 | 158.9 | 186   | 172.7 |
|        |       |       |       |       |
| 359118 |       | 1.7   | 2.3   | 1.3   |
| 378145 | 127.9 | 108.5 | 135.7 | 119.9 |
| 460018 | 15.5  | 18.5  | 20.4  | 17.8  |
| 434758 | 17.5  | 10.6  | 10.1  | 12.2  |
| 266916 | 9.4   | 8.9   | 10.5  | 7.5   |
| 322062 | 5.8   | 3.2   | 6     | 2.6   |
| 375608 | 43.4  | 53.5  | 58.9  | 66    |
| 339653 | 42.1  | 31.3  | 36.5  | 31.1  |
| 318661 | 9.7   | 8.6   | 11.4  | 10.3  |
| 321915 | 10.8  | 7.3   | 9.7   | 10    |
| 395536 | 56.3  | 47.9  | 56.7  | 64    |
| 419205 | 1.7   |       | 1.8   | 2.5   |
| 379706 | 46.6  | 36.9  | 23.1  | 16.9  |
| 322869 | 9.9   | 6.2   | 3.4   | 6.9   |
| 346270 | 32.6  | 25.9  | 23.2  | 23.8  |
| 374387 | 17.9  | 22.7  | 26.5  | 32.6  |
| 372565 | 3.1   |       |       | 2.4   |
| 308180 | 24.2  | 19.4  | 23.9  | 19.7  |
| 455543 |       | 1.5   |       | 1.3   |

|        |       |       |       |       |
|--------|-------|-------|-------|-------|
| 465352 | 17.8  | 15.7  | 19    | 15.3  |
| 399751 | 16.4  | 19.7  | 22.9  | 20.9  |
| 453330 | 37.1  | 36.5  | 51.4  | 35.6  |
| 431405 | 5.4   | 5.6   | 2.1   |       |
| 378878 | 10.1  | 8.3   | 9.6   | 8     |
| 408314 | 17.8  | 10.3  | 16    | 12.9  |
|        |       |       |       |       |
| 266706 | 10.7  | 7.7   | 7.6   | 5.7   |
| 431750 | 11.9  | 9.2   | 9.5   | 9.5   |
| 424697 | 35.3  | 35.6  | 38.9  | 40.5  |
| 306663 | 169.2 | 133.1 | 170.2 | 132.6 |
| 399867 | 25.3  | 29.2  | 32.2  | 31.4  |
| 404363 |       | 2.3   |       |       |
| 436427 | 7.7   | 6.5   | 12.7  | 8.7   |
| 346719 | 7.6   | 4.6   | 6.8   | 5.9   |
| 395103 | 25.2  | 21.4  | 26.4  | 20.7  |
| 321930 | 3.4   | 2.4   | 2.8   | 1.5   |
| 450880 | 27.2  | 16.1  | 21.3  | 18.5  |
| 459890 | 17.9  | 20    | 20.9  | 22.7  |
| 380399 | 7.4   | 5.6   | 5.9   | 7.1   |
| 450042 | 83.9  | 81.7  | 116.9 | 78.8  |
| 336729 | 1.5   |       | 2.2   | 2.1   |
| 448618 | 2.2   | 1.7   | 2.3   | 2.3   |
| 331500 |       |       | 1.6   |       |
| 429894 | 25.9  | 17.7  | 17.7  | 24.6  |
|        |       |       |       |       |
| 427644 | 155.9 | 185.9 | 183.7 | 186   |
| 436535 | 53.5  | 31.3  | 37.9  | 30.2  |
| 383054 | 2.5   | 5.5   | 5.9   | 9.6   |
| 384263 | 1.9   | 1.8   | 1.6   |       |
| 308080 | 155.6 | 148.9 | 153.8 | 130.6 |
| 428627 | 7     | 6     | 5.4   | 3.4   |
| 371840 | 35.2  | 28.1  | 31.1  | 40.6  |
| 283983 | 191.7 | 211.3 | 220.6 | 237.5 |
| 337270 | 50.1  | 63.7  | 98.1  | 90.2  |
| 379687 | 84.5  | 63.1  | 73.7  | 66.6  |
| 372852 | 40.3  | 48.8  | 54.5  | 56.1  |
| 280614 | 71.1  | 64.7  | 74.3  | 77.6  |
| 419317 |       |       | 2     |       |
| 390627 |       |       |       | 1.6   |
| 436435 | 2.7   | 2.9   | 2     | 2.3   |
| 436634 | 1.8   | 1.5   |       |       |
| 339515 | 202.9 | 247.4 | 302.9 | 266.5 |
| 448244 | 12.5  | 12.8  | 20.1  | 17.4  |
| 385185 | 2.7   |       | 2.5   | 2.6   |
| 387983 | 1.5   | 1.9   |       |       |
| 287051 | 25    | 20.2  | 27.2  | 19.5  |
| 448736 | 5     | 3.1   | 6.2   | 6.4   |
| 322223 | 2.5   | 2.2   | 2.6   | 3.4   |
| 383131 | 3.4   | 6.4   | 6.3   | 11.1  |
| 451563 | 22.1  | 19.4  | 24.3  | 21.6  |
| 428223 | 17.7  | 16.7  | 13.7  | 14.8  |

|        |       |       |       |       |
|--------|-------|-------|-------|-------|
| 346517 | 129.6 | 71.6  | 74    | 66.1  |
| 459738 | 2.9   | 2.1   | 2.6   | 1.8   |
| 320524 | 9.2   | 5.7   | 10.2  | 12.7  |
| 430970 | 24.4  | 15.4  | 15.4  | 17.2  |
| 430970 | 24.4  | 15.4  | 15.4  | 17.2  |
|        |       |       |       |       |
| 431603 | 18.8  | 16.5  | 17.8  | 20.3  |
| 375071 | 30.5  | 23.2  | 24.9  | 24.1  |
| 343926 | 30.5  | 24.3  | 22.2  | 22.6  |
| 395767 | 26.5  | 15.3  | 16    | 30.3  |
| 402067 | 6.4   | 3     | 2.1   | 5.6   |
| 254016 |       |       |       | 5.4   |
| 380434 | 6.8   | 10.6  | 7.5   | 8.9   |
| 428273 | 12.4  | 11.4  | 12.1  | 14.9  |
| 337411 | 172.8 | 136.1 | 167.4 | 166.2 |
| 378254 | 22.8  | 17.6  | 20.5  | 20.2  |
| 399381 | 197   | 135.8 | 147.5 | 154.4 |
| 452107 | 5.8   | 3.2   |       | 1.9   |
| 376857 | 38.5  | 36.9  | 48.6  | 38.5  |
| 283971 | 46.9  | 45.2  | 63.2  | 58.3  |
| 280726 | 29.5  | 26.3  | 26.7  | 29.8  |
| 334468 | 20.1  | 16.4  | 18.5  | 16.6  |
| 448508 | 3.1   | 2.5   | 7.4   | 9.3   |
| 400570 | 17.6  | 13.1  | 14.9  | 17.2  |
| 384392 | 5.9   |       | 2.8   | 1.5   |
| 282458 | 12.5  | 9.6   | 17.4  | 14.5  |
| 403675 | 1.5   |       |       | 1.5   |
| 389231 |       |       |       | 1.7   |
| 430539 | 7.5   | 6     | 5.6   | 3.4   |
| 387259 | 1.5   |       |       |       |
| 310866 | 12.9  | 8.1   | 13.1  | 10.2  |
| 346579 | 6.3   | 2.8   | 5.3   | 6.6   |
| 311415 | 38.9  | 38.9  | 61.9  | 58.2  |
| 381411 | 2.4   | 5.3   | 2.9   | 2.6   |
| 266582 | 8.6   | 6.7   | 7.2   | 5.8   |
| 253935 | 2.9   | 2.3   | 1.7   | 2.3   |
| 450080 | 17.1  | 13    | 16.1  | 22.8  |
| 382803 | 1.9   | 5     | 3.2   | 6.5   |
| 467524 | 9.6   | 9.5   | 5.3   | 15.7  |
| 262470 | 22.9  | 22.2  | 28.3  | 24    |
| 390592 |       | 1.9   | 1.9   |       |
| 393371 | 18.7  | 16.8  | 21.6  | 22.3  |
| 343456 | 5.9   | 2.8   | 2.7   | 2.5   |
| 340288 | 6.9   | 7.2   | 3.3   | 6.2   |
| 399320 | 469.7 | 322   | 187.4 | 166.8 |
| 423656 | 16.6  | 14.4  | 21    | 20.3  |
| 287195 | 16.7  | 15.4  | 17.5  | 17.5  |
| 369934 | 25.7  | 27    | 28.5  | 31.2  |
| 453617 | 6.4   | 6.3   | 9.3   | 7.6   |
| 399788 | 26.2  | 22.5  | 25.4  | 19.6  |
| 399264 | 133.1 | 140.5 | 205.6 | 186.1 |
| 280874 | 95.9  | 91.5  | 114.8 | 71.5  |

|        |       |       |       |       |
|--------|-------|-------|-------|-------|
| 397350 | 37.7  | 35.1  | 37    | 32.5  |
| 262220 | 148.5 | 101.9 | 118.3 | 120   |
| 280927 | 90.1  | 71.8  | 78.6  | 83.1  |
| 429861 | 28.8  | 26.7  | 27    | 26.6  |
| 395905 | 31.7  | 28.4  | 31.2  | 32.4  |
| 450537 | 14.2  | 11.3  | 10.9  | 12.3  |
| 369757 | 30.9  | 26.3  | 23    | 32.3  |
| 354965 |       |       | 2.3   | 1.4   |
| 379798 | 6.4   | 2.1   | 5.3   | 3.3   |
| 451967 | 8.8   | 7     | 7.8   | 10.6  |
| 266413 | 10    | 7.4   | 14.1  | 8.6   |
| 474888 |       | 1.2   |       |       |
| 407755 | 14.5  | 9.4   | 6.9   | 6     |
| 449134 | 12.8  | 10.9  | 14.8  | 14.1  |
| 262304 | 44.9  | 42.3  | 52    | 52.2  |
| 405304 | 9.3   | 3     | 6.1   | 6.1   |
| 430064 | 11.5  | 9.3   | 11.7  | 12.1  |
| 249734 | 18.3  | 16.4  | 30.2  | 22.4  |
| 379030 | 16.4  | 15.9  | 18.4  | 14.6  |
|        |       |       |       |       |
| 346369 | 6.1   | 5.8   | 8.3   | 2.8   |
| 402032 | 8.5   | 4.9   | 2.8   | 4.7   |
| 465026 | 9.6   | 7.2   | 7.4   | 7.6   |
| 281033 | 65.4  | 47.7  | 55.6  | 58.5  |
| 453925 | 52.9  | 49.7  | 54.2  | 56.5  |
| 373457 | 22.8  | 15.1  | 13.1  | 23.4  |
| 378032 | 25.6  | 37.7  | 45    | 34.1  |
| 360647 | 5.7   | 3     | 5.8   | 2.5   |
|        |       |       |       |       |
| 305448 | 61.4  | 54.4  | 64.6  | 68.8  |
| 369205 | 58.9  | 51.9  | 64.5  | 51.1  |
| 430101 | 6.2   | 7.6   | 5.5   | 7.4   |
| 282002 | 22.4  | 28    | 39.3  | 35.5  |
| 321811 |       |       | 1.5   | 1.4   |
| 433377 | 6.9   | 2.7   | 2.6   | 6     |
| 378257 | 31.5  | 19.8  | 25.4  | 22.3  |
| 424565 | 1.8   |       | 1.7   |       |
| 431569 | 2.4   | 1.9   |       | 1.5   |
| 411872 |       | 2.1   |       | 1.8   |
| 424909 | 12.5  | 14.6  | 15.2  | 14.7  |
| 395851 | 17.2  | 12.6  | 16.4  | 20.9  |
| 322282 | 9.3   | 7.7   | 10.2  | 7.3   |
| 374497 | 20.9  | 22.1  | 21.7  | 28.2  |
| 385808 | 5.6   | 1.9   | 1.6   | 4.5   |
| 341961 |       | 1.6   | 1.8   | 1.9   |
| 436539 |       | 1.6   |       | 1.5   |
| 265594 | 5.9   | 5.8   | 5.6   | 7.9   |
| 451366 | 51.8  | 111.3 | 55.6  | 116.6 |
| 379252 | 43.6  | 47.1  | 21.9  | 54.7  |
| 396165 | 194   | 213.3 | 113.9 | 183.6 |
| 396126 | 96.5  | 112.3 | 37.3  | 103.8 |
| 396056 | 192   | 281.8 | 104   | 240.6 |

|        |       |       |      |       |
|--------|-------|-------|------|-------|
| 457593 | 9.3   | 24    | 9    | 25.2  |
| 373432 | 121   | 129.5 | 53.5 | 114.8 |
| 427855 | 19.2  | 36.2  | 18.3 | 33.9  |
| 438175 | 43.3  | 56    | 22.9 | 62.1  |
| 438174 | 52.5  | 75.6  | 22.8 | 67.9  |
| 414550 |       | 1.7   |      | 1.6   |
| 412411 | 11.9  | 16.2  | 5.8  | 16.2  |
| 412496 | 8.8   | 13.5  | 5.5  | 12.4  |
| 293100 | 42    | 23.4  | 13.9 | 10.8  |
| 293103 | 74.1  | 38.6  | 23.4 | 20.6  |
| 293691 | 23.3  | 13.7  | 7.8  | 10.2  |
| 347789 | 23.6  | 41.1  | 17.4 | 43.8  |
| 349227 | 7.4   | 7.1   | 5.9  | 11.5  |
| 347901 | 23.6  | 31.4  | 10.5 | 30.4  |
| 347978 | 61.2  | 87.8  | 32.9 | 87.2  |
| 348078 | 12.1  | 22.2  | 6.5  | 19.1  |
| 348597 | 13.3  | 14.1  | 10   | 16.7  |
| 348819 | 14.6  | 15    | 11.7 | 12.6  |
| 348949 | 5.6   | 5.6   | 7    | 6.3   |
| 348302 | 12.5  | 11.8  | 6.3  | 17    |
| 348153 | 62.6  | 82.2  | 34.8 | 81.1  |
| 348464 | 16.9  | 16.7  | 12.9 | 21    |
| 458764 | 49.7  | 55.2  | 16.8 | 49.3  |
| 339173 | 17.4  | 25.4  | 8.1  | 22    |
| 339191 | 46.8  | 52.2  | 18.7 | 45.1  |
| 338901 | 116   | 191.3 | 76.2 | 181.4 |
| 433076 | 10.9  | 10.5  | 5.6  | 8.9   |
| 431034 | 9.8   | 8.5   | 4.7  | 5.9   |
| 389783 |       | 1.6   |      | 1.5   |
| 347735 | 5.8   | 8.9   | 2.8  | 12.4  |
| 438285 | 3     | 7.3   | 5.7  | 7.9   |
| 400663 | 28.7  | 43.4  | 19   | 41.5  |
| 400541 | 58.6  | 68.4  | 22.9 | 66    |
| 428319 | 67.9  | 94.1  | 29.1 | 80.3  |
| 379155 | 2.1   | 2.6   | 1.6  | 2.7   |
| 458779 | 85.3  | 91.4  | 27.5 | 73.1  |
| 455607 | 24.4  | 16.5  | 13.6 | 20.7  |
| 425090 | 96.5  | 86.4  | 64   | 92.6  |
| 438032 | 7.8   | 7.2   | 5.8  | 9     |
| 458641 | 23.8  | 49.2  | 21.8 | 45.6  |
| 453485 | 24.5  | 32.2  | 14.7 | 28    |
| 373300 | 54.9  | 74.8  | 43.5 | 79    |
| 316801 | 24.9  | 32.1  | 16.1 | 28.8  |
| 425033 | 53.4  | 54.1  | 33.6 | 52.7  |
| 449204 | 24.7  | 31.9  | 13.9 | 27.3  |
| 292617 | 3.2   | 6.7   | 8.3  | 6.3   |
| 318601 | 82.8  | 98.7  | 68.1 | 111.4 |
| 371414 | 13    | 11.1  | 11.3 | 12.8  |
| 400551 | 102.5 | 105.7 | 34.9 | 99.2  |
| 431055 | 6.9   | 8.1   | 2.9  | 7.3   |
| 428220 | 12.1  | 14.9  | 10.4 | 18.1  |
| 400776 | 13.6  | 18.1  | 7.3  | 17    |

|        |       |       |       |       |
|--------|-------|-------|-------|-------|
| 451369 | 1.9   | 10.4  | 2.4   | 7.8   |
| 400442 | 9.9   | 16.5  | 10.2  | 21.5  |
| 292833 | 34.6  | 31    | 23.3  | 35    |
| 429280 | 45.4  | 33.9  | 25.9  | 26.2  |
| 318454 | 132   | 201.7 | 95.6  | 223.5 |
| 457601 | 62.3  | 41.3  | 53.6  | 33.4  |
| 457556 | 21.5  | 11.4  | 33.1  | 12.5  |
| 378294 | 19.3  | 11.5  | 20.7  | 12.8  |
| 378132 | 96.8  | 34    | 44.3  | 32.6  |
| 378382 | 13.3  | 5.2   | 16.2  | 9.2   |
| 378091 | 18.5  | 5.6   | 12.5  | 7.4   |
| 432578 | 16.2  | 9.5   | 11.8  | 13.1  |
| 403123 | 17.6  | 11.8  | 15.4  | 12.8  |
| 403031 | 53.6  | 41.1  | 59.6  | 47.7  |
| 309347 | 44.1  | 24.4  | 21.2  | 17.2  |
| 343098 | 27.1  | 21.4  | 42.9  | 27.4  |
| 264138 | 35.2  | 22.2  | 44.2  | 21.9  |
| 345835 | 15.7  | 10.4  | 18.1  | 6.9   |
| 345522 | 30.4  | 25.6  | 29.8  | 29    |
| 345682 | 19.8  | 10.1  | 25.2  | 11.1  |
| 345535 | 18.2  | 13.7  | 21.4  | 11.5  |
| 345989 | 11.1  | 10.1  | 13.8  | 6.6   |
| 345668 | 9.3   | 9.3   | 11.1  | 11.2  |
| 345823 | 47.6  | 34.7  | 34.5  | 37.3  |
| 400530 | 16    | 12.1  | 9.1   | 13.1  |
| 343227 | 279.4 | 124.1 | 206.9 | 123   |
| 288659 | 3.2   | 6.3   | 5.5   |       |
| 345224 | 15.3  | 12.4  | 22.4  | 13.5  |
| 379340 | 35.6  | 12.3  | 20.6  | 10.9  |
| 379246 | 11.1  | 9.2   | 15.4  | 10.1  |
| 457601 | 62.3  | 41.3  | 53.6  | 33.4  |
| 457556 | 21.5  | 11.4  | 33.1  | 12.5  |
| 443739 | 22.3  | 11.2  | 32    | 13.9  |
| 432578 | 16.2  | 9.5   | 11.8  | 13.1  |
| 403123 | 17.6  | 11.8  | 15.4  | 12.8  |
| 403031 | 53.6  | 41.1  | 59.6  | 47.7  |
| 466652 | 9.4   | 7.6   | 11.4  | 11.1  |
| 345835 | 15.7  | 10.4  | 18.1  | 6.9   |
| 345522 | 30.4  | 25.6  | 29.8  | 29    |
| 345682 | 19.8  | 10.1  | 25.2  | 11.1  |
| 345535 | 18.2  | 13.7  | 21.4  | 11.5  |
| 345989 | 11.1  | 10.1  | 13.8  | 6.6   |
| 345668 | 9.3   | 9.3   | 11.1  | 11.2  |
| 379341 | 11.5  | 2.8   | 2.9   | 2.7   |
| 345823 | 47.6  | 34.7  | 34.5  | 37.3  |
| 342838 | 168.8 | 107   | 167.3 | 68.1  |
| 342994 | 115.2 | 55.2  | 108.9 | 60.2  |
| 466628 | 2.3   |       | 3.3   | 1.3   |
| 288659 | 3.2   | 6.3   | 5.5   |       |
| 443621 | 5.7   | 3.1   | 6.2   | 5.2   |
| 345224 | 15.3  | 12.4  | 22.4  | 13.5  |
| 437948 | 20.4  | 29.1  | 19.1  | 23.1  |

|        |       |       |       |       |
|--------|-------|-------|-------|-------|
| 437849 | 5.1   | 5.4   | 6.5   | 3.3   |
| 438058 | 6.6   | 8.9   | 5.6   | 4.9   |
| 332661 | 25.6  | 37.3  | 29.7  | 34.3  |
| 268007 | 50.5  | 68.3  | 56    | 60    |
| 268006 | 57.9  | 70.6  | 50.5  | 59.7  |
| 267918 | 10.1  | 9.7   | 10.6  | 11.9  |
| 327203 | 5.8   | 5.8   | 6.1   | 5.9   |
| 327196 | 12    | 14.5  | 11.5  | 11.9  |
| 322534 | 3     | 5.4   | 6.9   | 2.5   |
| 382524 | 12    | 8.5   | 10.4  | 8.9   |
| 447809 | 9.6   | 8     | 7.6   | 6.4   |
| 380971 | 42.3  | 18.6  | 26.9  | 27.9  |
| 380974 | 55.3  | 27.7  | 32.6  | 36.5  |
| 377303 | 9.2   | 2.7   | 5.9   | 3.2   |
| 305590 | 451   | 163.9 | 245.6 | 186   |
| 377306 | 13.6  | 11.6  | 11.4  | 9.3   |
| 307946 | 88.5  | 96    | 103.1 | 102.7 |
| 299251 | 12.6  | 11.5  | 13.6  | 13.5  |
| 299324 | 3     |       | 2.1   | 1.9   |
| 435162 | 19.9  | 16.4  | 22.7  | 17.6  |
| 282413 | 27.1  | 28.3  | 26.9  | 28.8  |
| 269113 | 10.4  | 13.4  | 10.1  | 12.3  |
| 408508 | 4.8   | 5.1   | 2     | 2.3   |
| 428908 | 10.1  | 14.3  | 13.8  | 18    |
| 328352 | 28.5  | 24.8  | 27    | 29.8  |
| 428938 | 46.8  | 54.5  | 46.7  | 56.1  |
| 337299 | 56.6  | 52.4  | 49.8  | 52.9  |
| 328229 | 5.7   | 2.2   | 3.4   | 6.7   |
| 433620 | 22.2  | 17.1  | 16.3  | 15.8  |
| 433501 | 63.2  | 62.4  | 35.3  | 62.7  |
| 428801 | 78.9  | 65.5  | 66.5  | 62.8  |
| 428706 | 56.9  | 52.3  | 61.8  | 59.6  |
| 286413 | 17.5  | 12.9  | 27.3  | 20.6  |
| 370068 | 107.8 | 107.9 | 88.9  | 126.9 |
| 401823 | 21.5  | 27.1  | 21.8  | 43.4  |
| 370052 | 336.7 | 356   | 328.3 | 440.2 |
| 349161 | 53.6  | 93    | 88.4  | 91.9  |
| 349317 | 112.7 | 90.2  | 82.9  | 94.7  |
| 335087 | 155.2 | 227.2 | 216.6 | 243.7 |
| 335084 | 244.8 | 367.4 | 319.7 | 349.3 |
| 423694 | 53.4  | 51.6  | 50.4  | 51.3  |
| 390062 | 2.8   | 5.9   | 2.6   | 5.2   |
| 389995 | 2.9   | 3.2   | 6.6   | 3.2   |
| 346478 | 148.9 | 132.1 | 151.5 | 137.7 |
| 250479 | 19.1  | 22.8  | 23.9  | 28.4  |
| 379424 | 16.7  | 13.1  | 12.8  | 11.1  |
| 371144 | 68.4  | 67.3  | 84.4  | 72    |
|        |       |       |       |       |
| 379424 | 16.7  | 13.1  | 12.8  | 11.1  |
| 371144 | 68.4  | 67.3  | 84.4  | 72    |
|        |       |       |       |       |
| 364955 | 3.5   | 1.9   | 3     | 6.9   |

|        |       |      |       |       |
|--------|-------|------|-------|-------|
| 424820 | 39.9  | 36.6 | 29    | 41.3  |
| 298774 | 1.3   | 1.8  |       |       |
| 290395 | 37.1  | 16.1 | 28.3  | 20.8  |
| 296078 | 3.3   | 1.8  | 7.2   | 1.5   |
| 449030 | 14.4  | 6.7  | 11.8  | 12.1  |
| 429134 | 41.4  | 30.7 | 32.2  | 36.6  |
| 454492 | 15    | 11.4 | 12.5  | 13.8  |
| 373502 | 21.3  | 21.2 | 19.4  | 22.9  |
| 289322 | 9.5   | 13   | 11.5  | 13.6  |
| 460910 | 19.2  | 26.6 | 23.5  | 28.5  |
| 460286 | 23.4  | 16.9 | 23.2  | 22.7  |
| 385889 | 6.9   | 7.7  | 7.3   | 6.5   |
| 398973 | 38.2  | 42.6 | 40.1  | 40.2  |
| 437023 | 3.3   | 2.4  | 3.1   | 5.2   |
| 429364 | 11.8  | 16.6 | 14.6  | 14.8  |
| 437786 | 2.6   | 2.9  | 2.1   | 5.5   |
| 382776 | 7.9   | 8.1  | 7.3   | 6     |
| 435873 | 5.5   |      |       |       |
| 382020 | 8.6   | 9    | 8     | 8     |
| 377557 | 68.8  | 67.7 | 67.7  | 69.8  |
| 289584 | 15.8  | 13.7 | 19.8  | 15    |
|        |       |      |       |       |
| 450491 | 19.7  | 16.3 | 15.6  | 17.4  |
| 289584 | 15.8  | 13.7 | 19.8  | 15    |
|        |       |      |       |       |
| 450491 | 19.7  | 16.3 | 15.6  | 17.4  |
| 289584 | 15.8  | 13.7 | 19.8  | 15    |
|        |       |      |       |       |
| 450491 | 19.7  | 16.3 | 15.6  | 17.4  |
| 310250 | 300.3 | 159  | 315.4 | 165.1 |
| 377466 | 15.7  | 12.2 | 24.1  | 11.7  |
| 342688 | 32    | 28.6 | 44    | 34.5  |
| 398202 | 51.7  | 46.4 | 33.6  | 25.6  |
| 462312 | 10.9  | 10   | 9.1   | 5.4   |
| 459615 | 7.2   | 5.8  | 3.2   | 6.6   |
| 448316 | 5.2   | 6.1  | 4.8   | 5.4   |
| 383520 | 3.1   | 5    | 1.9   | 2.3   |
| 267989 | 11.5  | 10.8 | 15.6  | 11.2  |
| 384343 | 5.5   | 2.2  | 3.3   | 5.1   |
| 384341 | 11.9  | 8.2  | 10.1  | 10.5  |
| 384175 | 42.5  | 25.1 | 33.6  | 29.7  |
| 384262 | 10.8  | 6.9  | 8.1   | 6.7   |
| 384173 | 49    | 33.5 | 42    | 36.2  |
| 451998 | 33.3  | 20.6 | 23.8  | 34.8  |
| 383109 |       | 5.8  | 7.1   | 7.7   |
| 384027 | 15.5  | 15.1 | 22.5  | 20.4  |
| 380537 | 40.2  | 25.9 | 28.5  | 30.5  |
| 380553 | 36.8  | 25.5 | 26.7  | 29.5  |
| 380577 | 12.8  | 6.7  | 9.6   | 8.4   |
| 380749 | 6.9   | 6.8  | 5.8   | 5.5   |
| 380652 | 27.9  | 24.2 | 22.5  | 28.3  |
| 379601 | 40.2  | 42.1 | 65.7  | 49.1  |



|        |       |       |       |       |
|--------|-------|-------|-------|-------|
| 453214 | 41.6  | 43.6  | 57.7  | 44.7  |
| 379712 | 5.4   | 3.3   | 5     | 2.6   |
| 379691 | 89.8  | 66.7  | 84.8  | 68.9  |
| 382971 | 3.5   | 2.3   | 2.8   | 6.7   |
| 382947 | 3.1   | 9     | 9     | 16    |
| 382891 | 7.7   | 8.6   | 9     | 13.2  |
| 382864 | 6.2   | 6.8   | 7.7   | 12.3  |
| 383028 | 6.7   | 10.1  | 8.6   | 14.9  |
| 452650 | 8.3   | 5.9   | 8.5   | 7.7   |
| 452651 | 2.4   |       |       |       |
| 381744 | 18.3  | 15.2  | 10.7  | 26.2  |
| 450044 | 2.3   | 1.6   | 8     | 6.1   |
| 395260 | 8     | 6.3   | 7.6   | 5.5   |
| 450158 | 31.7  | 16.5  | 23    | 15.8  |
| 395032 | 46.7  | 32.9  | 38.4  | 35.5  |
| 396173 | 15.2  | 12.5  | 14.5  | 16.7  |
| 397101 | 39.1  | 43    | 29.2  | 21.1  |
| 451040 | 12.6  | 9.1   | 11.2  | 13.2  |
| 451040 | 12.6  | 9.1   | 11.2  | 13.2  |
| 451124 | 18.8  | 17.9  | 18.4  | 25.6  |
| 451124 | 18.8  | 17.9  | 18.4  | 25.6  |
| 389307 | 8.6   | 7.8   | 10.2  | 9.3   |
| 393270 | 37.8  | 26.6  | 31.5  | 32.3  |
| 393222 | 43.9  | 32.1  | 36.4  | 33.1  |
| 390721 | 1.7   | 1.4   | 2.3   | 2     |
| 390660 | 25.2  | 23.5  | 26.3  | 19.1  |
|        |       |       |       |       |
| 360737 | 6.7   | 5.8   | 6     | 6.1   |
| 360719 | 6.1   | 6.3   | 6.2   | 2.8   |
| 360802 | 6.1   | 7.8   | 7.5   | 2.2   |
| 360829 | 8.8   | 7.6   | 7.7   | 8.9   |
| 361108 | 21    | 18.6  | 20.9  | 22    |
| 360964 | 7.4   | 3.3   | 5     | 6.1   |
| 360923 | 25.4  | 21.5  | 25.9  | 24.4  |
| 359180 | 2.3   | 6.3   | 2.3   | 2     |
| 359094 | 6.2   | 6.2   | 7.8   | 6.8   |
| 359014 | 6.8   | 5.5   | 8.8   | 6.7   |
| 358992 | 9.4   | 7.4   | 11.6  | 8.7   |
| 375723 | 23.1  | 20    | 20.8  | 24.9  |
| 375682 | 22.9  | 15.6  | 13.2  | 18.7  |
| 453469 | 24    | 18.6  | 28.8  | 20.9  |
| 378945 | 91.4  | 71.2  | 95.7  | 78.1  |
| 453323 | 119.8 | 119.9 | 185.1 | 115.2 |
| 453396 | 52.8  | 45.8  | 64.3  | 49.5  |
| 377299 | 21.8  | 20.8  | 20.1  | 22.3  |
| 453756 | 165.9 | 141.7 | 153.3 | 134.8 |
| 453763 | 54    | 38    | 53    | 42.9  |
| 377299 | 21.8  | 20.8  | 20.1  | 22.3  |
| 453611 | 71.1  | 76.4  | 107.1 | 86.1  |
| 455676 | 3.1   | 2.3   | 2     | 2.5   |
| 455819 | 12    | 10.3  | 11.1  | 14.7  |
| 369591 | 37.2  | 31.7  | 41    | 32.6  |

|        |       |       |       |       |
|--------|-------|-------|-------|-------|
| 369586 | 121.4 | 109.1 | 124.3 | 104.6 |
| 367700 | 6.6   | 1.9   | 3.1   | 3.3   |
| 427920 | 94.4  | 85.1  | 117.6 | 108.4 |
| 430193 | 12    | 8     | 8.9   | 9.1   |
| 429606 | 2.3   | 3     | 2.8   | 2.2   |
| 429524 | 2.2   | 5.7   | 3     | 6.4   |
| 429517 | 2.1   | 3.1   | 1.9   | 1.6   |
| 429611 | 1.5   | 2.8   | 2.4   | 3.1   |
| 429982 | 54.8  | 59.5  | 59.9  | 69.8  |
| 429968 | 54.9  | 56.8  | 65.6  | 69.2  |
| 429715 | 1.4   |       |       |       |
| 429709 | 16.6  | 13.3  | 12.8  | 12.4  |
| 424799 | 99.7  | 72.4  | 110.7 | 84.4  |
| 424775 | 91    | 79.5  | 114.5 | 76.5  |
| 424755 | 83    | 68.8  | 103.6 | 71.9  |
| 422344 | 81.8  | 50.4  | 87.1  | 52.1  |
| 422343 | 40.4  | 20.2  | 42.6  | 24.5  |
| 422315 | 41.3  |       | 58.4  | 61.4  |
| 422313 | 10.9  |       | 13.2  | 15.3  |
| 423640 | 26    | 17.5  | 25.6  | 26.5  |
| 425598 | 9.1   | 9.5   | 13.1  | 10.4  |
| 436528 | 84.7  | 55.3  | 75.8  | 64.9  |
| 434889 | 9     | 7.8   | 5.6   | 9.2   |
| 434772 | 76.1  | 95    | 55.5  | 99.9  |
| 435796 | 6.8   | 6     | 5.9   | 6.1   |
| 438742 | 2     | 1.7   | 1.6   |       |
| 434727 | 69.8  | 70.5  | 59.7  | 83.8  |
| 434723 | 53.1  | 52.2  | 58.4  | 64.4  |
| 442308 |       |       |       | 1.7   |
|        |       |       |       |       |
| 432433 | 40.3  | 33    | 39.8  | 48    |
| 432370 | 1.6   |       | 2.1   |       |
| 432342 | 2.3   | 2.6   | 3.3   | 2.8   |
| 442243 | 5.4   | 5.6   | 10.9  | 7     |
| 442130 | 12.6  | 13.2  | 18.7  | 11.6  |
| 432518 | 6.3   | 2.4   | 7.4   | 2.7   |
| 442205 | 23.5  | 11.8  | 20.3  | 14.9  |
| 431604 | 95    | 76.9  | 82.3  | 79    |
| 431584 | 9.6   | 10    | 9.9   | 9.2   |
| 431579 | 101.6 | 80.4  | 81.9  | 75.2  |
| 431540 | 18.9  | 16.5  | 13.5  | 31.8  |
| 431472 | 17.7  | 15.9  | 16.2  | 20.3  |
| 431455 | 14.2  | 10.9  | 11.7  | 10.3  |
| 431443 | 12.2  | 15.8  | 11.3  | 11.1  |
| 431425 | 2.1   | 2.4   |       | 2     |
| 431620 | 29.7  | 18.8  | 20.4  | 22.2  |
| 431635 | 30.2  | 17.9  | 11.6  | 17.2  |
| 431949 | 43.3  | 30.6  | 43.6  | 43.3  |
| 431775 | 27.4  | 19.1  | 23.2  | 20    |
| 431761 | 61.5  | 40.2  | 39.5  | 40.1  |
| 431725 | 96    | 73.5  | 74.7  | 66.6  |
| 431674 | 7.4   | 6.7   | 6     | 7.9   |

|        |      |      |      |      |
|--------|------|------|------|------|
| 442087 | 6.8  | 9.7  | 13.4 | 8.3  |
| 434625 | 23   | 19.9 | 22.1 | 17.8 |
| 434617 | 5.2  | 3.2  | 2.5  | 2.4  |
| 434601 | 25.3 | 24.7 | 26.2 | 22   |
| 434524 | 40.4 | 36.4 | 45.8 | 36.3 |
| 434519 | 2.4  | 4.8  | 5.9  | 3.3  |
| 434499 | 40.4 | 38.9 | 40.5 | 42.2 |
| 434384 | 12.7 | 12.1 | 12.2 | 11.1 |
| 433522 | 9.7  | 5.3  | 9.1  | 5.8  |
| 446876 | 29.2 | 27.1 | 33.5 | 22.4 |
| 446877 | 26.7 | 21.6 | 25.3 | 24.5 |
| 404574 | 5.4  | 5.1  | 3.2  | 8    |
| 447974 | 32.4 | 23.9 | 31.8 | 29   |
| 405421 | 44   | 37.3 | 42.3 | 40.3 |
| 405097 | 34.2 | 30.2 | 32.3 | 30.6 |
| 405010 | 51.4 | 48.8 | 63   | 49.2 |
| 446683 | 18.8 |      | 19.8 | 21.4 |
| 446689 | 13.4 |      | 20   | 24.2 |
| 407921 | 7.7  | 11   | 6.9  | 9.3  |
| 446711 | 19.9 | 12.6 | 17.2 | 16.6 |
| 446654 | 15.1 | 11.1 | 15.4 | 13.2 |
| 446670 | 11.5 | 10   | 10.5 | 10.7 |
| 446788 | 12.5 | 7.6  | 9.1  | 9.2  |
| 407204 | 27.5 | 28   | 29   | 33.2 |
| 446718 | 6    | 2.1  | 5.8  | 2.8  |
| 446719 | 16.3 | 11.9 | 16.9 | 11.2 |
| 404055 | 2.8  | 3.2  | 11.7 | 6    |
| 400585 | 21.4 | 19   | 18.8 | 20.8 |
| 400719 | 15.1 | 13.8 | 15.8 | 17.8 |
| 448983 | 33.4 | 14.9 | 19.4 | 12.9 |
| 399562 | 64.5 | 41.9 | 45.1 | 52.1 |
| 399967 | 66.5 | 59.7 | 59   | 60.2 |
| 399855 | 37   | 37.9 | 38.4 | 38.3 |
| 399794 | 28.2 | 29.9 | 36   | 33.8 |
| 448030 | 25.9 | 25.4 | 41.1 | 34.4 |
| 403431 | 18.9 | 14.3 | 8.9  | 9.5  |
| 448303 | 12.2 | 9.3  | 13.3 | 18.2 |
| 422144 | 78.7 | 68.8 | 88.1 | 84.3 |
| 422134 | 22.9 | 25.8 | 37.3 | 29.1 |
| 420928 | 2.9  | 6.5  | 2.5  | 5.3  |
| 420905 | 7.4  | 7.5  | 5.9  | 6.2  |
| 409361 | 3    | 3.3  | 3.1  | 5.9  |
| 409129 | 31.7 | 28.2 | 36.2 | 30.1 |
| 409024 | 8.5  | 7.3  | 9.5  | 6.7  |
| 409246 | 23.1 | 15.4 | 16   | 15.9 |
| 413014 | 6.1  | 6    | 5.9  | 5.8  |
| 413001 | 32.3 | 27.6 | 35.5 | 30.4 |
| 412834 | 2.6  | 2    | 6.1  | 2.8  |
| 465995 | 19   | 20.7 | 27.3 | 25.8 |
| 321047 | 79.3 | 55.6 | 71.5 | 62.1 |
| 467058 | 24.1 | 20.5 | 24.2 | 27.7 |
| 467062 | 6.8  | 2.9  | 3.3  | 6.2  |

|        |       |       |       |       |
|--------|-------|-------|-------|-------|
| 322958 | 2.4   | 3.1   | 1.4   | 3.2   |
| 322838 | 25.7  | 19.8  | 15.2  | 19.3  |
| 322746 | 13.1  | 13.4  | 10.3  | 14.2  |
| 322707 | 25.2  | 22.2  | 18.9  | 20.5  |
| 466452 |       |       |       | 1.8   |
| 323068 | 6.6   | 7.4   | 5.5   | 5     |
| 322595 | 15.9  | 11.2  | 16.5  | 11.2  |
| 322074 |       |       |       | 2.2   |
| 322558 | 10.9  | 10.2  | 8.7   | 10.4  |
| 322426 | 10.6  | 10.2  | 11.5  | 9.9   |
| 474887 | 143.8 | 152.1 | 206.7 | 185.7 |
| 332673 | 2.5   | 2.4   | 2.1   | 2.8   |
| 334078 | 127   | 102.2 | 109.1 | 126   |
| 464386 | 41.2  | 32.4  | 31.4  | 27.6  |
| 464396 | 5.8   | 2.6   | 2.3   | 4.5   |
| 474930 | 119.3 | 138.7 | 165.2 | 211.8 |
|        |       |       |       |       |
| 474784 | 57.5  | 40.3  | 50.4  | 51.8  |
| 465129 | 27.9  | 19.1  | 24.7  | 20.5  |
| 472176 | 16.8  | 20.1  | 21.5  | 23.1  |
| 472145 |       | 1.3   | 3     | 5.3   |
| 472135 | 10    | 13.5  | 14.2  | 18.8  |
| 312409 | 41.3  | 34.3  | 33.9  | 31.5  |
| 312316 | 30.6  | 13.6  | 12.4  | 16.8  |
| 312304 | 185.8 | 102.7 | 91.1  | 83.2  |
| 468463 | 6.5   | 9.1   | 11.9  | 13.3  |
| 314763 | 32.1  | 26.9  | 34.3  | 32.1  |
| 467567 | 2.4   |       | 2.3   |       |
| 314905 | 38.1  | 31.9  | 33.8  | 33.4  |
| 314902 | 96    | 81.2  | 85.5  | 77.9  |
| 468445 | 43.3  | 44.1  | 49.8  | 54.3  |
| 315035 | 34.5  | 30    | 33    | 28    |
| 315691 | 17.1  | 12.7  | 15.2  | 14    |
| 464260 | 8.1   | 5.9   | 7.8   | 5.8   |
| 350794 | 147.9 | 81.3  | 107.5 | 80.8  |
| 265703 | 10.9  | 6.8   | 8.9   | 3.3   |
| 344860 | 8.3   | 10.9  | 22.7  | 89.1  |
| 267000 | 35.3  | 32.2  | 45.2  | 37.3  |
| 266871 | 65.4  | 58.3  | 79.7  | 67.9  |
| 475133 | 33.2  | 24.3  | 26.5  | 30.2  |
| 458179 | 3.2   | 1.7   |       |       |
| 266428 | 48.3  | 41.5  | 57.3  | 45.6  |
| 266514 | 46.7  | 50.4  | 60.3  | 55.8  |
| 343376 | 44.9  | 34.4  | 53    | 39.5  |
| 343773 | 212.7 | 165.2 | 174.2 | 183   |
| 343589 | 181.2 | 170.9 | 229.3 | 215   |
| 350642 | 15.2  | 11.5  | 24.1  | 16    |
| 266734 | 65.4  | 58.2  | 83.9  | 69.5  |
| 255229 | 16.5  | 11.8  | 16    | 16.7  |
| 255183 | 54.4  | 45.6  | 62.7  | 57.4  |
| 255129 | 50.5  | 44.2  | 62.6  | 54.1  |
| 348660 | 23.9  | 22.7  | 18.3  | 11.7  |

|        |       |       |       |       |
|--------|-------|-------|-------|-------|
| 475422 | 21.9  | 20.1  | 31.1  | 18    |
| 475417 | 1.9   |       |       | 1.3   |
| 459873 | 48.5  | 41.9  | 52.9  | 51    |
| 459891 | 38.4  | 35.6  | 46.8  | 41.8  |
| 460005 | 12.3  | 12.5  | 12.3  | 12.3  |
| 475326 | 86    | 88.9  | 102.7 | 113.3 |
| 475325 | 27    | 25.6  | 31.2  | 29.1  |
| 346845 | 10.9  | 8.1   | 7.7   | 8.2   |
| 475324 | 54.2  | 54.3  | 59.7  | 68    |
| 346711 | 39.5  | 29.2  | 28.1  | 31.8  |
| 347140 | 19.2  | 14.4  | 13.1  | 14.9  |
| 346983 | 14.6  | 11.9  | 9.5   | 12    |
| 475330 | 45    | 45.6  | 55.1  | 52    |
| 346438 | 71    | 61.8  | 68.7  | 65.2  |
| 346571 | 76.6  | 63.4  | 55.8  | 57    |
| 346550 | 231.7 | 155.9 | 190.2 | 170   |
| 339561 | 28.6  | 24.2  | 34.4  | 28.7  |
| 475007 | 30.7  | 29.4  | 46.8  | 42.3  |
| 474999 | 40.6  | 40.3  | 46.3  | 51.5  |
| 340062 | 95.2  | 83.3  | 92.5  | 104.1 |
| 474979 | 326.2 | 292.8 | 355.4 | 341.8 |
| 474970 | 2.8   | 2     | 3.1   | 1.7   |
| 474992 | 10.5  | 10.4  | 11.4  | 12.5  |
| 342027 | 45.9  | 39.7  | 30    | 36.1  |
| 475068 | 375   | 315.8 | 379.6 | 368.2 |
| 475054 | 22.8  | 22.5  | 30.8  | 31.1  |
| 475053 | 61.2  | 66    | 89.6  | 86.5  |
| 472056 |       | 2.1   | 2.5   | 5.7   |
| 280718 | 159   | 133.8 | 135.2 | 144.1 |
| 369755 | 276.2 | 217.3 | 222   | 249.2 |
| 375614 | 63.9  | 74.6  | 86.3  | 93    |
| 369203 | 207.3 | 170   | 189.1 | 153.8 |
| 369554 | 165.2 | 110.1 | 170.3 | 96.3  |
| 322460 | 8.5   | 1.5   | 6.4   | 6.5   |
| 434410 | 6.2   | 7.1   | 6.8   | 3.1   |
| 266616 | 93    | 76.8  | 113.2 | 86.5  |
| 334793 | 185.8 | 158.9 | 186   | 172.7 |
| 408035 |       | 17.8  | 1.5   | 12.9  |
| 359118 |       | 1.7   | 2.3   | 1.3   |
| 378145 | 127.9 | 108.5 | 135.7 | 119.9 |
| 460018 | 15.5  | 18.5  | 20.4  | 17.8  |
| 434758 | 17.5  | 10.6  | 10.1  | 12.2  |
| 266916 | 9.4   | 8.9   | 10.5  | 7.5   |
| 322062 | 5.8   | 3.2   | 6     | 2.6   |
| 375608 | 43.4  | 53.5  | 58.9  | 66    |
| 339653 | 42.1  | 31.3  | 36.5  | 31.1  |
| 318661 | 9.7   | 8.6   | 11.4  | 10.3  |
| 321915 | 10.8  | 7.3   | 9.7   | 10    |
| 395536 | 56.3  | 47.9  | 56.7  | 64    |
| 419205 | 1.7   |       | 1.8   | 2.5   |
| 379706 | 46.6  | 36.9  | 23.1  | 16.9  |
| 322869 | 9.9   | 6.2   | 3.4   | 6.9   |

|        |       |       |       |       |
|--------|-------|-------|-------|-------|
| 346270 | 32.6  | 25.9  | 23.2  | 23.8  |
| 374387 | 17.9  | 22.7  | 26.5  | 32.6  |
| 372565 | 3.1   |       |       | 2.4   |
| 308180 | 24.2  | 19.4  | 23.9  | 19.7  |
| 455543 |       | 1.5   |       | 1.3   |
| 465352 | 17.8  | 15.7  | 19    | 15.3  |
| 399751 | 16.4  | 19.7  | 22.9  | 20.9  |
| 453330 | 37.1  | 36.5  | 51.4  | 35.6  |
| 431405 | 5.4   | 5.6   | 2.1   |       |
| 378878 | 10.1  | 8.3   | 9.6   | 8     |
| 408314 | 17.8  | 10.3  | 16    | 12.9  |
|        |       |       |       |       |
| 266706 | 10.7  | 7.7   | 7.6   | 5.7   |
| 431750 | 11.9  | 9.2   | 9.5   | 9.5   |
| 424697 | 35.3  | 35.6  | 38.9  | 40.5  |
| 306663 | 169.2 | 133.1 | 170.2 | 132.6 |
| 399867 | 25.3  | 29.2  | 32.2  | 31.4  |
| 436427 | 7.7   | 6.5   | 12.7  | 8.7   |
| 346719 | 7.6   | 4.6   | 6.8   | 5.9   |
| 395103 | 25.2  | 21.4  | 26.4  | 20.7  |
| 321930 | 3.4   | 2.4   | 2.8   | 1.5   |
| 450880 | 27.2  | 16.1  | 21.3  | 18.5  |
| 459890 | 17.9  | 20    | 20.9  | 22.7  |
| 380399 | 7.4   | 5.6   | 5.9   | 7.1   |
| 450042 | 83.9  | 81.7  | 116.9 | 78.8  |
| 336729 | 1.5   |       | 2.2   | 2.1   |
| 448618 | 2.2   | 1.7   | 2.3   | 2.3   |
| 331500 |       |       | 1.6   |       |
| 429894 | 25.9  | 17.7  | 17.7  | 24.6  |
|        |       |       |       |       |
| 427644 | 155.9 | 185.9 | 183.7 | 186   |
| 436535 | 53.5  | 31.3  | 37.9  | 30.2  |
| 383054 | 2.5   | 5.5   | 5.9   | 9.6   |
| 384263 | 1.9   | 1.8   | 1.6   |       |
| 308080 | 155.6 | 148.9 | 153.8 | 130.6 |
| 428627 | 7     | 6     | 5.4   | 3.4   |
| 371840 | 35.2  | 28.1  | 31.1  | 40.6  |
| 283983 | 191.7 | 211.3 | 220.6 | 237.5 |
| 337270 | 50.1  | 63.7  | 98.1  | 90.2  |
| 379687 | 84.5  | 63.1  | 73.7  | 66.6  |
| 372852 | 40.3  | 48.8  | 54.5  | 56.1  |
| 280614 | 71.1  | 64.7  | 74.3  | 77.6  |
| 419317 |       |       | 2     |       |
| 390627 |       |       |       | 1.6   |
| 436435 | 2.7   | 2.9   | 2     | 2.3   |
| 436634 | 1.8   | 1.5   |       |       |
| 339515 | 202.9 | 247.4 | 302.9 | 266.5 |
| 448244 | 12.5  | 12.8  | 20.1  | 17.4  |
| 387983 | 1.5   | 1.9   |       |       |
| 287051 | 25    | 20.2  | 27.2  | 19.5  |
| 448736 | 5     | 3.1   | 6.2   | 6.4   |
| 322223 | 2.5   | 2.2   | 2.6   | 3.4   |

|        |       |       |       |       |
|--------|-------|-------|-------|-------|
| 383131 | 3.4   | 6.4   | 6.3   | 11.1  |
| 451563 | 22.1  | 19.4  | 24.3  | 21.6  |
| 428223 | 17.7  | 16.7  | 13.7  | 14.8  |
| 346517 | 129.6 | 71.6  | 74    | 66.1  |
| 459738 | 2.9   | 2.1   | 2.6   | 1.8   |
| 320524 | 9.2   | 5.7   | 10.2  | 12.7  |
| 430970 | 24.4  | 15.4  | 15.4  | 17.2  |
| 430970 | 24.4  | 15.4  | 15.4  | 17.2  |
| 431603 | 18.8  | 16.5  | 17.8  | 20.3  |
| 375071 | 30.5  | 23.2  | 24.9  | 24.1  |
| 343926 | 30.5  | 24.3  | 22.2  | 22.6  |
| 395767 | 26.5  | 15.3  | 16    | 30.3  |
| 402067 | 6.4   | 3     | 2.1   | 5.6   |
| 254016 |       |       |       | 5.4   |
| 380434 | 6.8   | 10.6  | 7.5   | 8.9   |
| 428273 | 12.4  | 11.4  | 12.1  | 14.9  |
| 337411 | 172.8 | 136.1 | 167.4 | 166.2 |
| 378254 | 22.8  | 17.6  | 20.5  | 20.2  |
| 399381 | 197   | 135.8 | 147.5 | 154.4 |
| 452107 | 5.8   | 3.2   |       | 1.9   |
|        |       |       |       |       |
| 376857 | 38.5  | 36.9  | 48.6  | 38.5  |
| 283971 | 46.9  | 45.2  | 63.2  | 58.3  |
| 280726 | 29.5  | 26.3  | 26.7  | 29.8  |
| 334468 | 20.1  | 16.4  | 18.5  | 16.6  |
| 448508 | 3.1   | 2.5   | 7.4   | 9.3   |
| 400570 | 17.6  | 13.1  | 14.9  | 17.2  |
| 384392 | 5.9   |       | 2.8   | 1.5   |
| 282458 | 12.5  | 9.6   | 17.4  | 14.5  |
| 403675 | 1.5   |       |       | 1.5   |
| 389231 |       |       |       | 1.7   |
| 430539 | 7.5   | 6     | 5.6   | 3.4   |
| 387259 | 1.5   |       |       |       |
| 310866 | 12.9  | 8.1   | 13.1  | 10.2  |
| 346579 | 6.3   | 2.8   | 5.3   | 6.6   |
| 311415 | 38.9  | 38.9  | 61.9  | 58.2  |
| 381411 | 2.4   | 5.3   | 2.9   | 2.6   |
| 266582 | 8.6   | 6.7   | 7.2   | 5.8   |
| 253935 | 2.9   | 2.3   | 1.7   | 2.3   |
| 450080 | 17.1  | 13    | 16.1  | 22.8  |
| 382803 | 1.9   | 5     | 3.2   | 6.5   |
| 467524 | 9.6   | 9.5   | 5.3   | 15.7  |
| 262470 | 22.9  | 22.2  | 28.3  | 24    |
| 390592 |       | 1.9   | 1.9   |       |
| 393371 | 18.7  | 16.8  | 21.6  | 22.3  |
| 343456 | 5.9   | 2.8   | 2.7   | 2.5   |
| 340288 | 6.9   | 7.2   | 3.3   | 6.2   |
| 399320 | 469.7 | 322   | 187.4 | 166.8 |
| 423656 | 16.6  | 14.4  | 21    | 20.3  |
| 287195 | 16.7  | 15.4  | 17.5  | 17.5  |
| 369934 | 25.7  | 27    | 28.5  | 31.2  |
| 453617 | 6.4   | 6.3   | 9.3   | 7.6   |

|        |       |       |       |       |
|--------|-------|-------|-------|-------|
| 399788 | 26.2  | 22.5  | 25.4  | 19.6  |
| 399264 | 133.1 | 140.5 | 205.6 | 186.1 |
| 280874 | 95.9  | 91.5  | 114.8 | 71.5  |
| 397350 | 37.7  | 35.1  | 37    | 32.5  |
| 262220 | 148.5 | 101.9 | 118.3 | 120   |
| 280927 | 90.1  | 71.8  | 78.6  | 83.1  |
| 429861 | 28.8  | 26.7  | 27    | 26.6  |
| 395905 | 31.7  | 28.4  | 31.2  | 32.4  |
| 450537 | 14.2  | 11.3  | 10.9  | 12.3  |
| 369757 | 30.9  | 26.3  | 23    | 32.3  |
| 354965 |       |       | 2.3   | 1.4   |
| 379798 | 6.4   | 2.1   | 5.3   | 3.3   |
| 451967 | 8.8   | 7     | 7.8   | 10.6  |
| 266413 | 10    | 7.4   | 14.1  | 8.6   |
| 474888 |       | 1.2   |       |       |
| 407755 | 14.5  | 9.4   | 6.9   | 6     |
| 449134 | 12.8  | 10.9  | 14.8  | 14.1  |
| 262304 | 44.9  | 42.3  | 52    | 52.2  |
| 405304 | 9.3   | 3     | 6.1   | 6.1   |
| 430064 | 11.5  | 9.3   | 11.7  | 12.1  |
|        |       |       |       |       |
| 249734 | 18.3  | 16.4  | 30.2  | 22.4  |
| 379030 | 16.4  | 15.9  | 18.4  | 14.6  |
|        |       |       |       |       |
| 346369 | 6.1   | 5.8   | 8.3   | 2.8   |
| 402032 | 8.5   | 4.9   | 2.8   | 4.7   |
| 465026 | 9.6   | 7.2   | 7.4   | 7.6   |
| 281033 | 65.4  | 47.7  | 55.6  | 58.5  |
| 453925 | 52.9  | 49.7  | 54.2  | 56.5  |
| 373457 | 22.8  | 15.1  | 13.1  | 23.4  |
| 378032 | 25.6  | 37.7  | 45    | 34.1  |
| 360647 | 5.7   | 3     | 5.8   | 2.5   |
|        |       |       |       |       |
| 305448 | 61.4  | 54.4  | 64.6  | 68.8  |
| 369205 | 58.9  | 51.9  | 64.5  | 51.1  |
| 430101 | 6.2   | 7.6   | 5.5   | 7.4   |
| 282002 | 22.4  | 28    | 39.3  | 35.5  |
| 321811 |       |       | 1.5   | 1.4   |
| 433377 | 6.9   | 2.7   | 2.6   | 6     |
| 378257 | 31.5  | 19.8  | 25.4  | 22.3  |
| 424565 | 1.8   |       | 1.7   |       |
| 431569 | 2.4   | 1.9   |       | 1.5   |
| 411872 |       | 2.1   |       | 1.8   |
| 424909 | 12.5  | 14.6  | 15.2  | 14.7  |
| 395851 | 17.2  | 12.6  | 16.4  | 20.9  |
| 322282 | 9.3   | 7.7   | 10.2  | 7.3   |
| 374497 | 20.9  | 22.1  | 21.7  | 28.2  |
| 385808 | 5.6   | 1.9   | 1.6   | 4.5   |
| 341961 |       | 1.6   | 1.8   | 1.9   |
| 436539 |       | 1.6   |       | 1.5   |
| 265594 | 5.9   | 5.8   | 5.6   | 7.9   |
| 321091 | 50.7  | 67.4  | 43.4  | 69.6  |



|        |       |       |       |       |
|--------|-------|-------|-------|-------|
| 321209 | 35.1  | 32.1  | 21.1  | 33.2  |
| 321197 | 43.1  | 44.3  | 28.8  | 54.2  |
| 312536 | 21.9  | 18.6  | 15    | 24.3  |
| 312532 | 63.1  | 53.2  | 34.8  | 48.4  |
| 312429 | 15.6  | 24.1  | 26    | 31    |
| 319230 | 7.5   | 9.2   | 9.8   | 9.5   |
| 345043 | 38.3  | 36.9  | 27.6  | 45.5  |
| 350751 | 7.2   | 14.2  | 8.8   | 15.8  |
| 351011 | 21    | 24    | 22.2  | 29.8  |
| 475128 | 110.4 | 140.2 | 121.5 | 179.5 |
| 475152 | 59.3  | 75.1  | 65.7  | 97.8  |
| 351197 | 27.5  | 29.3  | 25.6  | 40.9  |
| 351027 | 13.6  | 15.6  | 16.3  | 25.7  |
| 351181 | 34.8  | 41.3  | 33.4  | 42.9  |
| 312422 | 13.7  | 19.3  | 19.4  | 27.4  |
| 321039 | 16.7  | 15.8  | 14.6  | 21.5  |
| 344938 | 29.2  | 29.7  | 21.8  | 33.9  |
| 287029 | 9.5   | 10.3  | 14.5  | 11    |
| 381535 | 7.6   | 9.5   | 9.9   | 9.2   |
| 287039 | 17.6  | 20.6  | 29    | 20.8  |
| 345333 | 7.4   | 6.4   | 6.9   | 8.9   |
| 475150 | 2.3   | 2.4   | 3.3   | 3.1   |
| 474820 | 9.5   | 7.8   | 7.9   | 9.3   |
| 474812 | 57.7  | 74.5  | 74.8  | 74.4  |
| 475193 | 31.3  | 24.6  | 29.4  | 28.4  |
| 475088 | 66.4  | 65.8  | 73.2  | 67.8  |
| 340794 | 38.1  | 41.3  | 45.4  | 37.1  |
| 450137 | 24.5  | 11.6  | 17.4  | 13.7  |
| 374271 | 112   | 104.7 | 86    | 102.2 |
| 311921 | 170.7 | 136.7 | 204.3 | 140.4 |
| 292050 | 5.2   | 6.7   | 2.2   | 6.6   |
| 317837 | 35.3  | 50    | 50    | 47.7  |
| 311977 | 17.3  | 17.9  | 17.5  | 19.9  |
| 317843 | 6.2   | 5.6   | 3.4   | 6.9   |
| 373610 | 139.5 | 142.1 | 122.3 | 130.6 |
| 373724 | 74.9  | 71.2  | 73.7  | 83.4  |
| 374201 | 66.1  | 98.2  | 73.3  | 91    |
| 334099 | 111   | 124.3 | 93    | 138.1 |
| 373828 | 37.7  | 33.3  | 31.6  | 29.9  |
| 373505 | 47.6  | 50.8  | 49.6  | 52    |
| 374180 | 24.2  | 22.6  | 23.5  | 27.9  |
| 374337 | 16.2  | 19.9  | 19.7  | 21.2  |
| 355049 | 11.1  | 11.9  | 11.2  | 9.7   |
| 355202 | 9.4   | 8.6   | 7.8   | 7.8   |
| 400803 | 29.4  | 31.4  | 32.9  | 33.5  |
| 402753 | 13.1  | 7.9   | 9.8   | 8.3   |
| 460193 | 11.9  | 12.7  | 20.7  | 15.4  |
| 452039 | 8.5   | 7     | 10.7  | 8.9   |
| 400772 | 5     | 2.9   | 2.5   | 2.2   |
| 450095 | 17.3  | 17    | 20.6  | 23.6  |
| 457139 | 21.3  | 20.9  | 22.8  | 31.3  |
| 447976 | 12.9  | 11.8  | 17.4  | 16.4  |

|        |       |       |       |       |
|--------|-------|-------|-------|-------|
| 463068 | 3.4   | 2.6   |       | 2.2   |
| 463219 | 3.3   | 2.9   | 2.3   | 2.9   |
| 447923 | 1.3   |       |       |       |
| 450085 | 9.1   | 9.4   | 14.2  | 12.4  |
| 447920 | 6.2   | 12.7  | 30.6  | 13.4  |
| 391566 |       |       |       | 1.6   |
| 404860 | 13.7  | 18.7  | 16.6  | 26.7  |
| 322775 | 29    | 34.3  | 31.1  | 40.5  |
| 391560 |       |       | 2     |       |
| 377549 | 7.8   | 7.5   | 8.9   | 5.7   |
| 322719 | 1.9   | 3.2   |       | 3.2   |
| 346715 | 17.6  | 15.2  | 16.5  | 19.3  |
| 377473 | 15.7  | 13.2  | 18.2  | 13.5  |
| 451469 | 45.3  | 43    | 36.3  | 36.7  |
| 370704 | 16.8  | 16.6  | 7.9   | 14.5  |
| 423855 | 19.8  | 22.9  | 9.7   | 22.3  |
| 265098 | 35.7  | 41.6  | 27.3  | 35.3  |
|        |       |       |       |       |
| 423858 | 11.7  | 17.5  | 5.3   | 12.3  |
| 394717 | 180   | 177.3 | 122.5 | 148.5 |
|        |       |       |       |       |
| 393875 | 64.6  | 48.7  | 37.9  | 45.3  |
| 339534 | 28    | 35.1  | 28.4  | 33.3  |
| 427659 | 17.1  | 18.3  | 12.3  | 17.3  |
| 299262 | 2.4   | 5.7   | 5.8   | 2.7   |
| 255589 | 1.6   | 2     | 1.7   | 3.1   |
| 270608 | 51.2  | 48.9  | 48    | 51.8  |
| 379241 | 20.4  | 21.9  | 20.9  | 20.2  |
| 379185 | 69.5  | 57.1  | 71.4  | 51.6  |
| 255543 |       | 1.6   | 2.7   | 1.7   |
| 299268 | 1.4   |       |       |       |
| 379148 | 2.4   | 6     | 3     | 2.7   |
| 381108 | 23.6  | 34.9  | 26.1  | 40.9  |
| 381014 | 15.9  | 14.3  | 12.7  | 15.4  |
| 349755 | 50.3  | 80.6  | 64.2  | 92.4  |
| 405628 | 12.4  | 14.2  | 12.3  | 20.4  |
| 432468 | 53.3  | 73.5  | 65.8  | 104.9 |
| 432556 | 114.4 | 123.7 | 100.7 | 164.3 |
| 341804 | 51.1  | 26.7  | 57.9  | 35.3  |
| 403853 | 9.7   | 6.3   | 9.1   | 10.7  |
| 432479 | 10.7  | 14    | 11.9  | 15.1  |
| 332485 | 37.6  | 44.8  | 48.2  | 42.9  |
| 256781 | 49.1  | 69.2  | 68.7  | 72.5  |
| 431167 | 10.8  | 8.9   | 15.9  | 11    |
| 256763 | 6.3   | 7.9   | 12.3  | 10.9  |
| 375981 | 165.5 | 163.1 | 220.7 | 173.8 |
| 256740 | 6.1   | 7.5   | 3.2   | 7.9   |
| 402370 | 27.3  | 25.5  | 45.9  | 23    |
| 347752 | 23.1  | 6.3   | 11.8  | 7.6   |
| 448278 | 5.9   | 8.1   | 9.4   | 7.3   |
| 284759 | 53.3  | 34.6  | 48.9  | 45.7  |
| 397540 | 28.4  | 12.7  | 18.3  | 16.5  |

|        |       |       |       |       |
|--------|-------|-------|-------|-------|
| 377192 | 7.7   | 8.4   | 18.4  | 9.3   |
| 385661 | 2.6   | 1.5   | 1.8   |       |
| 379970 | 9.5   | 5.8   | 6.1   | 7.8   |
| 400462 | 23.5  | 28.6  | 25    | 22.4  |
| 266399 | 33    | 26.7  | 33    | 26.6  |
| 379972 |       |       | 1.3   |       |
| 332231 | 1.7   | 2.7   |       | 2.2   |
| 306483 | 113.6 | 156.1 | 105.8 | 166.1 |
| 264825 | 15.7  | 21.5  | 23    | 20.6  |
| 347466 | 9.6   | 9.8   | 9.2   | 15.4  |
| 471129 | 16.5  | 11.2  | 7.5   | 11.7  |
| 380414 | 14.9  | 18.9  | 10.9  | 6.4   |
| 380455 | 15.9  | 16.3  | 15.5  | 9.9   |
| 407423 | 19.3  | 27.4  | 15    | 10.9  |
| 373768 | 140   | 150.2 | 94    | 80.5  |
| 442795 | 9.2   | 5.2   | 3.1   | 6.1   |
| 437756 | 3.4   | 1.7   | 2.1   | 3.1   |
| 433583 | 11.2  | 7.8   | 11.7  | 11.6  |
| 394948 | 70.3  | 49.9  | 44.3  | 62.6  |
| 433579 | 3.3   | 2.2   | 2.7   | 7.7   |
| 457565 | 17.5  | 13.1  | 14.5  | 12    |
| 272038 | 8.9   | 8.5   | 7.2   | 6.8   |
| 264487 | 67.6  | 55.5  | 56.3  | 49.4  |
| 448429 | 18.1  | 15.2  | 20.9  | 16.7  |
| 264473 | 14.9  | 11.7  | 14    | 12.1  |
| 388600 |       | 1.6   | 7.6   | 3.2   |
| 463159 | 21.4  | 20.4  | 19.3  | 27.7  |
| 433408 | 3     | 3.1   | 2.8   | 2.1   |
| 300469 | 7.4   | 6.8   | 9.3   | 6.3   |
| 379424 | 16.7  | 13.1  | 12.8  | 11.1  |
| 371144 | 68.4  | 67.3  | 84.4  | 72    |
|        |       |       |       |       |
| 450491 | 19.7  | 16.3  | 15.6  | 17.4  |
| 379424 | 16.7  | 13.1  | 12.8  | 11.1  |
| 371144 | 68.4  | 67.3  | 84.4  | 72    |
|        |       |       |       |       |
| 450491 | 19.7  | 16.3  | 15.6  | 17.4  |
| 378733 | 6.5   | 5.6   | 6.6   | 7.5   |
| 350602 | 3.3   | 2.6   | 2.5   | 2.5   |
| 451731 | 29.9  | 20.8  | 28.7  | 25.1  |
| 434471 | 66.5  | 69.5  | 67.9  | 59    |
| 450765 | 176.4 | 250.4 | 168.6 | 255   |
| 469384 | 28.5  | 34.6  | 43.4  | 45.5  |
| 449970 | 18.5  | 19.8  | 18.6  | 26.4  |
| 461066 | 35.5  | 28.9  | 34.5  | 32.8  |
| 387007 | 2.1   | 2.2   |       | 1.6   |
| 370231 | 154.3 | 128.5 | 149.1 | 147.2 |
| 448269 | 2.3   | 2.6   | 1.8   | 2.2   |
| 448269 | 2.3   | 2.6   | 1.8   | 2.2   |
| 371869 | 41.7  | 40.4  | 47.2  | 36.7  |
| 294340 | 5.2   |       | 1.9   | 2.4   |
| 434240 | 10.2  | 9.4   | 5.5   | 8.5   |

|        |       |       |       |       |
|--------|-------|-------|-------|-------|
| 261519 | 28.9  | 21.3  | 14.6  | 19.7  |
| 375705 | 10.1  | 6.7   | 6.5   | 9.3   |
| 380510 | 47.2  | 104.2 | 53.7  | 113.1 |
| 380489 | 62.2  | 141.3 | 64.8  | 133.2 |
| 380384 | 35.7  | 74.5  | 38.7  | 85.4  |
| 380375 | 42.3  | 84.5  | 34    | 82.8  |
| 380281 | 14.1  | 42.9  | 14.9  | 41    |
| 391705 | 28.4  | 49.2  | 32.2  | 61.4  |
| 391690 | 8.5   | 18.4  | 9.5   | 17    |
| 391548 | 2.7   | 5.5   | 1.5   | 5.1   |
| 366733 |       |       | 1.3   |       |
| 353475 | 17.7  | 28.8  | 18.4  | 27.3  |
| 358403 | 25.1  | 30.2  | 19.2  | 40.5  |
| 358253 | 11.3  | 23.1  | 13.6  | 25.7  |
| 358241 | 12.3  | 23.8  | 11.9  | 21.8  |
| 435837 | 6.6   | 12    | 8.1   | 14.1  |
| 421229 |       |       |       | 1.8   |
| 322353 | 1.7   |       | 1.7   |       |
| 471401 | 43.9  | 97.6  | 49.3  | 111.3 |
| 347866 | 33.5  | 51.7  | 24.1  | 57.4  |
| 459166 | 27.1  | 31    | 17.8  | 35.2  |
| 459057 | 11.2  | 29.9  | 17    | 38.9  |
| 459159 | 13.4  | 31.1  | 13.8  | 41.8  |
| 459064 | 9.3   | 21.3  | 10.5  | 29.7  |
| 264755 | 87.7  | 172.1 | 53.5  | 178.2 |
| 322180 | 1.7   |       | 1.9   | 1.7   |
| 264543 | 185.1 | 234.9 | 139.3 | 225.7 |
| 264668 | 92.7  | 214.7 | 70    | 209.9 |
| 391545 |       | 1.7   |       | 1.7   |
| 264844 | 67.4  | 96.7  | 44.4  | 109.5 |
| 264440 | 148.3 | 277.7 | 113.2 | 302.5 |
| 323230 | 17.9  | 25    | 16.6  | 22.2  |
| 471248 | 41.2  | 102.1 | 50    | 126.5 |
| 380368 | 6.4   | 10.8  | 7.6   | 11.4  |
| 284575 | 48.7  | 72.7  | 37.1  | 73.6  |
| 347876 | 20.7  | 35.6  | 11.7  | 35.7  |
| 380254 | 11.7  | 9     | 8.5   | 8.6   |
| 380272 | 16.3  | 15.6  | 14    | 18.6  |
| 264681 | 27.8  | 30.5  | 21    | 29    |
| 347712 | 6     | 9.1   | 7.9   | 9     |
| 466582 | 1.8   | 2     | 3.2   | 2.2   |
| 456884 | 2.8   | 2.8   | 2.9   | 3.1   |
| 323090 | 2.5   | 5.6   | 2.4   | 5.9   |
| 435850 | 3.1   | 5.8   | 2.3   | 3.5   |
| 264681 | 27.8  | 30.5  | 21    | 29    |
| 415465 | 2.6   | 2.7   | 2.6   | 5.2   |
| 402466 | 2.8   | 2.3   | 1.7   | 3.3   |
| 458907 | 2.8   | 3.2   | 3.1   | 3.1   |
| 378132 | 96.8  | 34    | 44.3  | 32.6  |
| 378091 | 18.5  | 5.6   | 12.5  | 7.4   |
| 431542 | 104.9 | 75.5  | 127.2 | 85.8  |
| 431649 | 46.9  | 16.3  | 28.6  | 12.4  |

|        |       |       |       |       |
|--------|-------|-------|-------|-------|
| 431673 | 83.6  | 41.4  | 56.1  | 41.5  |
| 406438 | 11.9  | 8.6   | 14.2  | 6.8   |
| 406524 | 25    | 11.6  | 18.9  | 12.3  |
| 403123 | 17.6  | 11.8  | 15.4  | 12.8  |
| 403031 | 53.6  | 41.1  | 59.6  | 47.7  |
| 418064 | 25.1  | 12    | 14.6  | 10.6  |
| 466763 | 6.8   | 2.1   | 3.1   | 2.3   |
| 466858 | 2.2   | 1.4   | 5.2   | 1.6   |
| 466735 | 10.9  | 8.1   | 14.5  | 10.5  |
| 330241 | 10.8  | 7.4   | 7.5   | 3.4   |
| 330215 | 18.1  | 8.5   | 9.6   | 7.1   |
| 343098 | 27.1  | 21.4  | 42.9  | 27.4  |
| 345835 | 15.7  | 10.4  | 18.1  | 6.9   |
| 345522 | 30.4  | 25.6  | 29.8  | 29    |
| 345682 | 19.8  | 10.1  | 25.2  | 11.1  |
| 345535 | 18.2  | 13.7  | 21.4  | 11.5  |
| 345989 | 11.1  | 10.1  | 13.8  | 6.6   |
| 467022 | 2.8   | 1.8   |       | 2.1   |
| 345668 | 9.3   | 9.3   | 11.1  | 11.2  |
| 345823 | 47.6  | 34.7  | 34.5  | 37.3  |
| 400530 | 16    | 12.1  | 9.1   | 13.1  |
| 418201 | 1.5   | 1.7   | 1.9   |       |
| 343227 | 279.4 | 124.1 | 206.9 | 123   |
| 403781 | 10.9  | 6.4   | 9.5   | 8.3   |
| 417950 | 1.5   | 1.4   |       |       |
|        |       |       |       |       |
| 417819 |       | 1.5   | 6.2   |       |
| 433180 | 6.8   | 3     | 5.5   | 5.9   |
| 288659 | 3.2   | 6.3   | 5.5   |       |
| 418924 |       | 1.4   |       |       |
| 431514 | 6.2   | 1.5   | 3.3   | 2.1   |
| 330107 | 2.9   |       | 2.4   | 1.3   |
| 345224 | 15.3  | 12.4  | 22.4  | 13.5  |
| 384618 | 5.5   | 10    | 2.3   | 10.8  |
| 387411 | 30.9  | 55.3  | 24.2  | 50.5  |
| 387405 | 17.9  | 33.3  | 13.7  | 26.2  |
| 387347 | 1.5   | 3     |       | 2.2   |
| 452861 | 22.8  | 32.6  | 21    | 38.1  |
| 452666 | 58.8  | 160.8 | 54.6  | 175.5 |
| 452680 | 10.4  | 20.7  | 9.4   | 31.4  |
| 452766 | 90.4  | 143.9 | 71    | 167.6 |
| 429560 | 16.2  | 25.8  | 12    | 26.6  |
| 422299 | 118.3 | 291.7 | 106.9 | 293.4 |
| 422297 | 21.8  | 50.5  | 19.3  | 49.7  |
| 405742 | 40.5  | 66.7  | 31.1  | 58    |
| 405716 | 101.8 | 154.6 | 64.1  | 137.1 |
| 405615 | 9.6   | 19.4  | 8.9   | 16.1  |
| 446679 | 8.3   | 16.2  | 7.2   | 19.8  |
| 446671 | 22.8  | 42.3  | 19    | 47    |
| 322353 | 1.7   |       | 1.7   |       |
| 471401 | 43.9  | 97.6  | 49.3  | 111.3 |
| 264755 | 87.7  | 172.1 | 53.5  | 178.2 |

|        |       |       |       |       |
|--------|-------|-------|-------|-------|
| 322180 | 1.7   |       | 1.9   | 1.7   |
| 264543 | 185.1 | 234.9 | 139.3 | 225.7 |
| 452325 | 13.9  | 11    | 9.1   | 13.8  |
| 264668 | 92.7  | 214.7 | 70    | 209.9 |
| 384484 | 7.5   | 8.8   | 3.1   | 9.7   |
| 264844 | 67.4  | 96.7  | 44.4  | 109.5 |
| 452571 | 25    | 32.5  | 37.4  | 52.2  |
| 264440 | 148.3 | 277.7 | 113.2 | 302.5 |
| 387350 | 3.4   | 7.7   | 3.3   | 13.7  |
| 471248 | 41.2  | 102.1 | 50    | 126.5 |
| 284575 | 48.7  | 72.7  | 37.1  | 73.6  |
| 384374 | 3.3   | 5.9   | 5.7   | 6.3   |
| 264681 | 27.8  | 30.5  | 21    | 29    |
| 466582 | 1.8   | 2     | 3.2   | 2.2   |
| 452775 | 2.9   | 10.9  | 5.3   | 10.9  |
| 348951 | 6.8   | 7.6   | 7.6   | 8.2   |
| 452584 | 2.9   | 8.5   | 2.8   | 11.1  |
| 264681 | 27.8  | 30.5  | 21    | 29    |
| 377960 | 40.6  | 17    | 36.5  | 18.1  |
| 377887 | 108.8 | 56.7  | 89    | 59.1  |
| 443690 | 11.4  | 5.2   | 11.5  | 7.4   |
| 444010 | 11.8  | 5.5   | 10.1  | 6.3   |
| 443814 | 34.9  | 16.9  | 35.6  | 24.8  |
| 443917 | 27.4  | 15.9  | 26.4  | 16.8  |
| 408176 | 30.6  | 19.1  | 31.8  | 21.6  |
| 408010 | 21.6  | 14.6  | 20.6  | 15.8  |
| 418381 | 1.7   | 1.7   | 5.6   |       |
| 474504 | 16.7  | 11.4  | 17.2  | 14.4  |
| 474499 | 48.5  | 30.4  | 41.1  | 34.1  |
| 474310 | 12.2  | 12.6  | 12.7  | 11.9  |
| 293008 | 13.1  | 5.5   | 8.6   | 4.3   |
| 293119 | 9.1   | 6.4   | 7.7   | 6.6   |
| 292880 | 2.9   | 2.2   | 4.7   | 1.7   |
|        |       |       |       |       |
| 377987 | 38.2  | 18.4  | 20.6  | 23    |
| 377858 | 2.1   |       | 3     | 2.3   |
| 292905 | 11.7  | 9.4   | 12.6  | 8.3   |
| 408349 | 29.1  | 19.8  | 25.6  | 21.7  |
| 407871 | 6     | 5.5   | 5.9   | 2.6   |
| 408504 | 7.5   | 3.2   | 3.3   | 2.6   |
| 292206 | 2.8   |       |       | 1.3   |
|        |       |       |       |       |
| 398874 | 32.3  | 9.7   | 28.1  | 13.1  |
| 374815 | 17.4  | 11.3  | 20.2  | 12.5  |
| 437172 | 9.9   | 6.5   | 9.8   | 7.3   |
| 437082 | 20.2  | 22.3  | 21    | 24.4  |
| 437739 | 5.9   | 3.1   | 7.7   | 5.6   |
| 406484 | 16.2  | 5.7   | 20.5  | 9.5   |
| 403210 | 87.2  | 48.1  | 100   | 57    |
| 411830 |       |       |       | 1.3   |
| 443012 | 6.5   | 1.8   | 3.2   | 2.6   |
| 442784 | 2     |       | 1.7   |       |

|        |       |       |       |       |
|--------|-------|-------|-------|-------|
| 262968 | 23    | 14.8  | 28    | 19.9  |
| 442883 |       |       | 2.6   |       |
| 263067 | 26.8  | 20.9  | 40.1  | 27.4  |
| 437654 | 2.6   | 1.7   | 2.1   | 2.2   |
| 398785 | 89.8  | 66.4  | 119.4 | 95.2  |
| 341981 | 8.4   | 5.5   | 8.3   | 2.8   |
| 406501 | 5.5   |       | 6.6   | 2.7   |
| 305676 | 19.5  | 12.3  | 33.3  | 16.8  |
| 389253 | 2.5   | 1.4   |       | 1.3   |
| 455367 | 23.8  | 20.9  | 27.5  | 25.5  |
| 256979 | 9.3   | 6.4   | 6.8   | 5.8   |
| 274847 | 21.1  | 11.6  | 17.9  | 13.8  |
| 274787 | 7.9   | 3.1   | 9.3   | 5.9   |
| 275268 | 28.2  | 18    | 29    | 21.8  |
| 275256 | 27.7  | 18.8  | 24.8  | 21.7  |
| 275186 | 9.3   | 7.1   | 7.7   | 6.7   |
| 345003 | 18.8  | 13.2  | 20.3  | 16.6  |
| 263354 | 65.1  | 38    | 80.8  | 46    |
| 256938 | 2     | 1.5   |       | 1.9   |
| 339584 | 37.5  | 18.6  | 21.8  | 19.4  |
| 382129 |       | 2.3   | 1.8   | 1.5   |
| 382199 | 49.9  | 42.4  | 46.1  | 48.7  |
| 394554 | 8.5   | 12.3  | 19.4  | 11.7  |
| 394544 | 33.5  | 43.1  | 52.4  | 49.2  |
| 374610 | 23    | 19.9  | 20.9  | 18.1  |
| 405648 | 8.7   | 6     | 6.4   | 6.5   |
| 405569 | 13.4  | 12.9  | 17.1  | 13.8  |
| 448772 | 11.5  | 6.2   | 5.6   | 6.7   |
| 338108 | 27.1  | 18.3  | 19.1  | 18.1  |
| 457084 | 34.3  | 40    | 57.5  | 60    |
| 405525 |       | 2.5   | 5.6   |       |
| 337760 | 79.3  | 71.2  | 53.2  | 88.1  |
| 457109 | 2.6   | 8     | 8.3   | 7.8   |
| 454455 | 2.5   |       | 1.8   |       |
| 457231 | 39.4  | 41.3  | 45.1  | 52.3  |
| 386291 | 7.9   | 7.1   | 7.5   | 8.1   |
| 386278 | 48.9  | 61.5  | 63.6  | 71    |
| 397167 | 157.6 | 183.9 | 226.4 | 168.3 |
| 375875 | 6.6   | 10.7  | 16.5  | 10.9  |
| 401364 | 16.6  | 12.7  | 13.7  | 13.9  |
| 401482 | 35.6  | 35.7  | 28.7  | 34.9  |
| 344414 | 3.5   | 7.6   | 5.7   | 6.4   |
| 344560 | 6.2   | 6.8   | 7.1   | 6.9   |
| 344379 | 13.8  | 13    | 7.4   | 12.4  |
| 386182 | 2.4   | 2.7   | 1.6   | 1.8   |
| 397166 | 11.4  | 10.6  | 17    | 8.7   |
|        |       |       |       |       |
| 311050 | 170.7 | 143.6 | 147.2 | 155   |
| 468102 | 41.3  | 42.6  | 55.7  | 45.4  |
| 461362 | 14.4  | 14.5  | 12.8  | 17.1  |
| 461257 | 32.9  | 36.6  | 32.7  | 35.7  |
| 342534 | 42    | 39    | 52.3  | 39.3  |

|        |      |       |       |       |
|--------|------|-------|-------|-------|
| 336501 | 402  | 267.1 | 288.9 | 253.1 |
| 288444 | 1.5  |       | 1.6   | 1.6   |
| 336521 | 36   | 31.3  | 33.8  | 32.5  |
| 460252 | 12.7 | 12.6  | 12.9  | 9.8   |
| 461161 | 15.1 | 12.8  | 12.1  | 13.6  |
| 324909 | 10.4 | 13.5  | 10.6  | 11.8  |
| 324840 | 13.9 | 15    | 9.6   | 13.7  |
| 324761 | 9.9  | 11.6  | 5.7   | 10.9  |
| 324689 | 19.3 | 21.6  | 15.2  | 20.6  |
| 325106 | 2.7  | 3.4   | 2.1   | 2.7   |
| 324975 | 14.7 | 15.3  | 11.3  | 16.1  |
| 322470 | 9.9  | 10.6  | 6.1   | 8.7   |
| 349395 | 15   | 16.3  | 9.7   | 13.8  |
| 347439 | 30.4 | 25.7  | 18.9  | 26.1  |
| 349271 | 61.1 | 59.5  | 52.2  | 65.6  |
| 349129 | 36.2 | 29.2  | 20.9  | 25    |
| 336733 | 67.6 | 75.8  | 59.7  | 67    |
| 322327 | 3    | 2.9   | 6     | 3.3   |
| 347440 | 8    | 6.5   | 5.5   | 8.8   |
| 348984 | 15   | 16.7  | 11    | 13    |
| 337058 | 5.9  | 6.8   | 3.3   | 6.2   |
| 325024 | 6.7  | 8.7   | 3.4   | 8.1   |
| 347327 | 6.2  | 6.7   | 6.9   | 6.9   |
| 349130 | 2.2  | 1.5   | 1.3   | 5.1   |
| 454559 | 24.2 | 18.8  | 22.1  | 22.9  |
| 437847 | 5.3  | 3.2   | 3.3   | 5.6   |
| 460078 | 7.2  | 3.3   | 8.6   | 6.1   |
| 459977 | 1.9  |       |       |       |
| 460110 | 11.7 | 12.1  | 8.8   | 9.9   |
| 389962 | 1.9  | 1.8   |       | 1.6   |
| 454555 | 2.3  | 2.2   | 1.9   | 2.8   |
| 451878 | 12.4 | 12.9  | 12.1  | 14.7  |
| 398311 | 17.8 | 17.4  | 19.2  | 19.5  |
| 398357 | 60.3 | 47.9  | 43.5  | 47    |
| 398390 | 31.2 | 26.4  | 25.7  | 31.1  |
| 446352 | 20.7 | 16.8  | 15.6  | 20.6  |
| 380097 | 42.2 | 31.7  | 37.6  | 40.3  |
| 379989 | 36.6 | 31.4  | 37.8  | 35.4  |
| 463899 | 1.7  | 2.7   | 6     | 3     |
| 324800 | 18.8 | 17    | 23.2  | 20.4  |
| 465941 | 14.8 | 27.1  | 25.7  | 36.6  |
| 327814 | 3.3  | 7.6   | 7.8   | 9.5   |
| 254810 | 40.9 | 44.7  | 31.7  | 44.6  |
| 346972 | 15.5 | 21.2  | 11    | 17.6  |
| 346949 | 16.9 | 17.2  | 9     | 15.1  |
| 327800 | 8.9  | 5.9   | 6.5   | 6.3   |
| 254791 | 5.7  | 2.4   | 2.4   | 2.3   |
| 336320 | 75.3 | 59.3  | 66.9  | 72.3  |
| 399489 | 35.1 | 43.3  | 22    | 11    |
| 471710 | 31.2 | 29.7  | 22    | 23.2  |
| 300547 | 25   | 21.3  | 11.6  | 5.2   |
| 462598 | 14.9 | 17    | 8.3   | 6.3   |



|        |       |       |       |       |
|--------|-------|-------|-------|-------|
| 431854 | 16.9  | 16    | 13.2  | 10.6  |
| 300437 | 1.8   | 7.1   | 2.3   |       |
| 471696 | 8.2   | 11.3  | 7     | 6.6   |
| 383041 | 3.2   | 5.4   | 1.7   | 1.8   |
| 364085 | 9.3   | 7.3   | 8.9   | 13    |
| 426071 | 30.4  | 27.1  | 23.3  | 21.6  |
| 332258 | 15.7  | 16.7  | 17.1  | 15.4  |
| 454506 | 26.4  | 30.9  | 34.2  | 33.4  |
| 326204 | 2.2   | 3     | 6.7   | 2.7   |
| 352655 | 2.6   | 3.3   | 1.8   | 2.7   |
| 429375 | 15.3  | 12.5  | 13.5  | 11.3  |
| 475175 | 41.6  | 40.4  | 45.1  | 47.8  |
| 429425 | 11.5  | 11    | 14.9  | 9.8   |
| 435844 | 8.1   | 6.7   | 5.7   | 7.1   |
| 264159 | 31.4  | 30.3  | 33.9  | 32.8  |
| 435731 | 14.8  | 14.6  | 11.8  | 10.8  |
| 429344 | 6.2   | 7.7   | 7.6   | 6.7   |
| 467132 | 12.6  | 12.8  | 9.9   | 11.3  |
| 469360 | 67    | 71    | 62.6  | 82.6  |
| 351372 | 13.9  | 16.4  | 10.4  | 15.3  |
| 307092 | 44.4  | 56.2  | 57.2  | 89.7  |
| 469335 | 13.2  | 10.4  | 12.1  | 11.6  |
| 466960 | 3.1   | 3.3   | 3     | 8.3   |
| 464840 | 107.9 | 108.1 | 108.8 | 131   |
| 425719 | 42.8  | 37.1  | 32.8  | 41.6  |
| 446713 | 20.4  | 25.3  | 18    | 22.8  |
| 269693 | 6.6   | 8.7   | 9     | 7.5   |
| 433223 | 23.5  | 26.6  | 27.2  | 24.8  |
| 418415 | 1.8   |       |       |       |
| 424084 | 19.3  | 19.1  | 16    | 19.9  |
| 435380 | 34.2  | 19.4  | 30.1  | 21.1  |
| 406055 | 5.6   | 2.3   | 4.4   | 2.3   |
| 345058 | 24.2  | 25.5  | 23.3  | 33.3  |
| 345062 | 12.5  | 12.6  | 8.5   | 14.9  |
| 432463 | 30.8  | 29.7  | 30.5  | 36.4  |
| 411055 | 6.8   | 5.3   | 8.1   | 2.3   |
| 312932 | 31.9  | 26.6  | 28.2  | 25.7  |
| 351892 | 13.8  | 13.1  | 12.1  | 11.6  |
| 314365 | 13.1  | 15.9  | 18.4  | 13.1  |
| 397707 | 52    | 52.9  | 70.1  | 57.9  |
| 351762 | 13    | 13.8  | 14.6  | 15.2  |
| 387637 | 1.8   | 1.5   | 2.3   |       |
| 430507 | 61.3  | 80.8  | 57.3  | 80.7  |
| 438228 | 13.3  | 17.4  | 14.1  | 18.5  |
| 401196 | 18.6  | 21.8  | 18.7  | 20.5  |
| 403660 | 2.9   | 6.3   | 1.5   | 2.9   |
| 403656 | 8     | 10.1  | 6.7   | 11    |
| 427451 | 32.9  | 32.4  | 30.3  | 32    |
| 264626 | 18.3  | 17.8  | 21.3  | 22.3  |
| 370380 | 180.4 | 169.7 | 168.4 | 175.7 |
| 399536 | 43.9  | 36.6  | 35.9  | 39.9  |
| 343567 | 107.8 | 111.5 | 128   | 116.8 |

|        |       |       |       |       |
|--------|-------|-------|-------|-------|
| 264735 | 34.7  | 45.1  | 23    | 41.6  |
| 284690 | 20.6  | 18.2  | 24.2  | 24.3  |
| 379424 | 16.7  | 13.1  | 12.8  | 11.1  |
| 371144 | 68.4  | 67.3  | 84.4  | 72    |
| 289584 | 15.8  | 13.7  | 19.8  | 15    |
|        |       |       |       |       |
| 450491 | 19.7  | 16.3  | 15.6  | 17.4  |
| 379424 | 16.7  | 13.1  | 12.8  | 11.1  |
| 371144 | 68.4  | 67.3  | 84.4  | 72    |
| 289584 | 15.8  | 13.7  | 19.8  | 15    |
|        |       |       |       |       |
| 450491 | 19.7  | 16.3  | 15.6  | 17.4  |
| 457467 | 27.8  | 22.7  | 33.1  | 26.4  |
| 454153 | 5.6   | 4.8   | 6.4   | 5.1   |
| 339563 | 14    | 16.5  | 11.4  | 11.1  |
| 403258 | 52.3  | 49.1  | 70.3  | 56.5  |
| 355115 | 12.9  | 10.2  | 11.9  | 10.2  |
| 375627 | 173.5 | 272.8 | 49.2  | 50.6  |
| 428602 | 171   | 233.2 | 49.4  | 59.9  |
| 428597 | 42.7  | 66.6  | 10.9  | 9.8   |
| 428494 | 184.2 | 182.5 | 128.2 | 118.4 |
| 430310 | 21.8  | 23.3  | 6.3   | 5.9   |
| 430228 | 187.6 | 340.3 | 52    | 67.5  |
| 430209 | 68.2  | 150.3 | 32.6  | 28.5  |
| 445559 | 60.2  | 68.2  | 16.4  | 15.4  |
| 425265 | 6.6   | 7.7   | 2.7   | 3.2   |
| 309911 | 243   | 345.5 | 140.2 | 143.3 |
| 467748 | 68.7  | 92.2  | 23.4  | 24.5  |
| 467632 | 21.4  | 27.3  | 7.8   | 5.9   |
| 468416 | 46.1  | 60.2  | 10.3  | 12.6  |
| 348029 | 48.3  | 66.4  | 27.5  | 34.8  |
| 348199 | 57.2  | 72    | 14.3  | 15.5  |
| 346771 | 15.4  | 20.5  | 8.4   | 9.7   |
| 346649 | 69.5  | 86.2  | 36.3  | 36.6  |
| 375548 | 24    | 32.3  | 10.1  | 12.1  |
|        |       |       |       |       |
| 321563 | 2.5   | 2.5   | 1.7   | 1.7   |
| 348297 | 68.1  | 84.4  | 42.6  | 54.8  |
| 375638 | 16.8  | 24    | 7     | 10.7  |
| 473288 | 1.9   | 4.9   |       | 1.8   |
| 348219 | 7.1   | 9.9   | 2.1   | 2.3   |
| 425235 | 44.4  | 49.7  | 45.8  | 62.1  |
| 463995 | 1.8   | 2.4   | 6.3   | 3.2   |
| 379230 | 17.9  | 15.1  | 9.4   | 13.2  |
| 348051 | 6.6   | 12.6  | 1.7   | 2.4   |
| 451382 | 5.4   | 5.9   | 6.8   | 6.1   |
| 376956 | 1.5   | 1.5   | 1.5   | 6.1   |
| 435901 | 11.3  | 18.4  | 12.2  | 17.5  |
| 435897 | 11.7  | 18.8  | 11.8  | 18.9  |
| 435164 | 21.4  | 33.2  | 21.7  | 33.6  |
| 434902 | 5.7   | 10.8  | 7.1   | 10.1  |
| 435817 | 57.2  | 93.6  | 60.4  | 87.7  |

|        |       |       |       |       |
|--------|-------|-------|-------|-------|
| 435814 | 41.5  | 61.4  | 48.3  | 72.6  |
| 435689 | 6.8   | 9.7   | 9.4   | 12.4  |
| 408896 | 34.5  | 40.9  | 30.8  | 44    |
| 422178 | 49.3  | 83    | 83.7  | 111.8 |
| 320922 | 10.4  | 14.2  | 9     | 12.4  |
| 321227 | 8.4   | 8.1   | 7.8   | 9.8   |
| 320775 | 14.8  | 26.1  | 17.6  | 28    |
| 320770 | 9.5   | 13.2  | 10.4  | 17.9  |
| 320595 | 16.6  | 22.1  | 11.3  | 35.4  |
| 318615 | 15.7  | 8.5   | 7.7   | 9.2   |
| 344241 | 16.7  | 33.9  | 28.9  | 44.5  |
| 435153 | 6     | 6.4   | 6.9   | 8.7   |
| 437078 | 3.3   | 6.6   | 2.1   | 7.5   |
| 409577 | 5.9   | 8.4   | 7.1   | 10.1  |
| 420080 |       | 2.1   | 1.6   | 2.2   |
| 408820 | 26.7  | 29.2  | 28.1  | 31.8  |
| 344261 | 61.2  | 125.8 | 60.3  | 76.2  |
| 321099 | 10.6  | 7.1   | 3.4   | 9.2   |
| 344627 | 14.6  | 20.9  | 15.1  | 24.8  |
| 343035 | 115   | 137.7 | 104   | 146   |
| 344441 | 110.7 | 159   | 121.5 | 188.1 |
| 376910 | 18.3  | 15.6  | 9     | 16.8  |
| 346986 | 2.8   | 1.8   | 1.7   | 3     |
|        |       |       |       |       |
| 445266 | 5.2   | 3.4   | 6.4   | 7.9   |
| 445278 | 16.6  | 17.4  | 19.9  | 18.9  |
| 445452 | 21.1  | 15.9  | 13.5  | 17.5  |
| 445471 | 63.3  | 53    | 46.6  | 50.7  |
| 448242 | 2.7   | 3     | 6.5   | 2.7   |
| 324282 | 26.8  | 14.6  | 15.4  | 18.3  |
| 324176 | 14.4  | 13.1  | 18.4  | 16.2  |
| 287523 | 34.1  | 24.1  | 24.2  | 38.6  |
| 287400 | 12    | 12.2  | 8.7   | 13.6  |
| 265889 | 15.1  | 15.2  | 12.2  | 18    |
| 345532 | 22.8  | 19    | 24.1  | 20.3  |
| 265973 | 1.3   |       |       |       |
| 423830 | 6     | 3.3   | 5.7   | 2     |
|        |       |       |       |       |
| 280451 | 18.5  | 19.3  | 20.1  | 14.6  |
| 280451 | 18.5  | 19.3  | 20.1  | 14.6  |
| 393785 | 24.2  | 24.5  | 18.5  | 22.1  |
| 306181 | 108.7 | 140.1 | 190.3 | 158.6 |
| 393793 | 1.5   |       |       | 1.4   |
| 456702 | 26.2  | 24.9  | 26.7  | 25.7  |
| 306189 | 28    | 28.7  | 42.1  | 37    |
| 388264 | 3     | 5.6   | 3.5   | 3.5   |
| 388373 | 8.4   | 7.6   | 5.1   | 7     |
| 422051 | 13.7  | 13.9  | 9.4   | 13.9  |
| 335044 | 26.1  | 22    | 22.8  | 25.7  |
| 335036 | 168.3 | 150   | 138.1 | 156.8 |
| 336057 | 186.8 | 202.2 | 223.5 | 204.2 |
| 458335 | 11.7  | 11    | 12    | 10    |

|        |      |       |       |       |
|--------|------|-------|-------|-------|
| 378109 | 17.4 | 14.3  | 20.7  | 21.6  |
| 388377 | 13.2 | 9.1   | 12.3  | 11.6  |
| 336070 | 8.8  | 7.9   | 9.1   | 6     |
|        |      |       |       |       |
| 446505 | 48   | 40.3  | 48.6  | 45.5  |
| 348009 | 30.5 | 30.9  | 38.1  | 32.9  |
| 260810 | 38.9 | 36.2  | 45.9  | 35.9  |
| 454427 | 57.3 | 45    | 52.1  | 58.6  |
| 340530 | 17.9 | 17.5  | 18.4  | 18.2  |
| 446511 | 14.7 | 13.3  | 11.4  | 14.6  |
| 471853 | 14.3 | 11.6  | 6.6   | 10.8  |
| 468349 | 15.9 | 22.3  | 24.7  | 31.2  |
| 268745 | 34   | 27.8  | 21.7  | 35    |
| 268658 | 27.4 | 27.3  | 19.2  | 32.5  |
| 268553 | 7.9  | 9.2   | 7.2   | 10.2  |
| 321238 | 9.4  | 8.5   | 7.9   | 6.1   |
| 406169 | 5    | 6     | 3.1   | 2.4   |
| 407733 | 18.4 | 14.8  | 13.4  | 16.4  |
| 382667 | 13   | 9.6   | 8     | 9.7   |
| 344728 | 10.8 | 10    | 10.6  | 13.1  |
| 469763 | 7.9  | 7.5   | 4.8   | 8.1   |
| 467434 | 11.4 | 11.2  | 11.8  | 12.5  |
| 461866 | 16.5 | 11.9  | 11.6  | 17.9  |
| 275319 | 3.2  | 2.7   | 2.3   | 3.3   |
| 448272 | 5.7  | 3.3   | 3.4   | 7.5   |
| 447943 | 16.1 | 13.4  | 20.9  | 21.9  |
| 419774 | 15.3 | 12.6  | 13.3  | 13.5  |
| 271752 | 17.6 | 15.7  | 19.1  | 17.2  |
| 410585 | 19.7 | 13    | 18.5  | 13.2  |
| 410045 | 33.4 | 26.5  | 37.4  | 31.3  |
| 352142 | 7.1  | 3.3   | 5.8   | 5.3   |
| 381559 | 10.3 | 9.2   | 9.8   | 5.7   |
| 444763 | 7.9  | 10.2  | 9     | 8.9   |
| 352466 | 22.5 | 24.2  | 21    | 27.5  |
| 452024 | 2.6  | 2.5   | 2.9   | 2.7   |
| 452001 | 43   | 40.3  | 30.5  | 39    |
| 475168 | 71.7 | 57.8  | 39.9  | 53.4  |
|        |      |       |       |       |
| 284572 | 88.8 | 117.7 | 110.6 | 125.1 |
| 455645 |      | 2.7   |       | 1.3   |
| 465174 | 6.8  | 3     | 5.4   | 6     |
| 395996 | 69.2 | 71.7  | 76    | 70.6  |
| 375748 | 37.2 | 30.7  | 28    | 34.3  |
| 352927 | 13.9 | 12.1  | 11    | 13.2  |
| 352922 | 12.3 | 8.7   | 10.3  | 14.7  |
| 412445 | 7    | 7     | 3.4   | 5.9   |
| 466161 | 6.9  | 6.4   | 4.2   | 8     |
| 389457 | 15.3 | 16.6  | 18.4  | 14.2  |
| 389396 | 38   | 36.6  | 35.6  | 33.7  |
| 389313 | 34.2 | 29.8  | 33.3  | 29.5  |
| 373194 | 40.4 | 28.5  | 31    | 33.5  |
| 429372 | 78.7 | 73.2  | 74.9  | 73.1  |

|        |       |       |       |       |
|--------|-------|-------|-------|-------|
| 432575 | 7.8   | 6.2   | 10    | 8.5   |
| 405767 | 13    | 11.9  | 9.8   | 10.3  |
| 412019 | 30    | 29.8  | 39    | 30.3  |
| 413408 | 9     | 5.9   | 5.2   | 6.6   |
| 429287 | 37.6  | 31    | 34.1  | 33.6  |
| 411870 | 2.5   | 3.1   | 2.7   | 6.4   |
| 373186 | 52.4  | 49.8  | 50.8  | 52.3  |
| 428615 | 26.1  | 17.3  | 20.2  | 18.1  |
| 429317 | 12.5  | 9.9   | 13    | 10.4  |
| 413247 | 1.8   |       |       |       |
| 370504 | 41.2  | 41.7  | 45.1  | 41.4  |
| 432587 | 5.5   | 3.2   | 1.7   | 3.1   |
| 335564 | 635.5 | 588.3 | 697.9 | 609.8 |
| 335568 | 172.5 | 162.7 | 167.9 | 150.8 |
|        |       |       |       |       |
| 370500 | 219.8 | 196   | 186.5 | 193.1 |
| 432508 | 6.7   | 3.1   | 8.4   | 8.3   |
| 449380 | 5.1   | 5.6   | 2.6   | 2.6   |
| 372515 | 66.7  | 147.6 | 29.8  | 31.4  |
| 432373 | 77.1  | 119.1 | 29.1  | 22.6  |
| 431578 | 21.3  | 20.4  | 11.2  | 15    |
| 316689 | 20    | 22.6  | 19    | 17.4  |
| 316827 | 8.6   | 12.2  | 1.9   | 2.4   |
| 473738 | 13.4  | 15    | 8.2   | 8.8   |
| 462748 | 41.3  | 74.6  | 20.6  | 20.1  |
| 340261 | 28    | 29.9  | 16    | 18.6  |
| 376391 | 69.4  | 138.5 | 36    | 39.9  |
| 376484 | 309.2 | 321.9 | 56.5  | 72    |
| 461070 | 60    | 40.4  | 14.7  | 14.7  |
| 458278 | 13.8  | 12.5  | 7.7   | 8.3   |
| 465423 | 3.3   | 7.5   | 2.1   | 3.4   |
| 465534 | 6.9   | 6.3   | 1.4   | 1.4   |
| 341306 | 14.4  | 16    | 11.2  | 8.5   |
| 455929 | 17.7  | 16.6  | 8.5   | 12.5  |
| 384291 | 11.2  | 12.9  | 8.2   | 13.9  |
| 384206 | 49.7  | 57.8  | 44.1  | 69    |
| 384077 | 80.4  | 101.5 | 97.7  | 143.1 |
| 354080 | 3     | 2.9   | 2.8   | 7.3   |
| 335828 | 177.6 | 199.9 | 122.7 | 355.8 |
| 292908 | 17.7  | 21.5  | 19.3  | 21.1  |
| 292619 | 22.7  | 27.5  | 27.9  | 37.4  |
| 292473 | 96.5  | 106.9 | 98.6  | 135.3 |
| 292406 | 91.6  | 142.5 | 110.8 | 139.3 |
| 344430 | 72.5  | 94.7  | 53.4  | 104.2 |
| 344247 | 19.7  | 32.5  | 27.9  | 40.4  |
| 447835 | 13.7  | 12.8  | 19.6  | 16    |
| 335838 | 12.1  | 10.8  | 8.1   | 22.3  |
| 384208 | 66.2  | 76.3  | 60    | 86.6  |
| 383008 | 12.9  | 12.9  | 11.6  | 17.3  |
| 292489 | 59.6  | 67.8  | 51.7  | 66.5  |
| 282616 | 40.8  | 58    | 50.8  | 88.4  |
| 448356 | 19.4  | 17.4  | 22.5  | 26.6  |

|        |       |       |       |       |
|--------|-------|-------|-------|-------|
| 384081 | 93.7  | 118   | 99.7  | 140   |
| 270209 | 32.3  | 30.5  | 27.2  | 30.5  |
| 458353 | 34.2  | 28.5  | 36.3  | 38.5  |
| 262797 | 56.5  | 72.1  | 67.1  | 98.3  |
| 383942 | 5.7   | 12.6  | 7.5   | 13.5  |
| 434153 | 7.7   | 11.7  | 9.6   | 11.8  |
| 292764 | 9.6   | 12.4  | 13.1  | 12.4  |
| 448356 | 19.4  | 17.4  | 22.5  | 26.6  |
| 262916 | 35.2  | 38.2  | 40.1  | 53    |
| 383490 | 12.9  | 14.4  | 15.7  | 15    |
| 388793 | 20.4  | 2.4   | 3     | 2.4   |
| 377394 | 87    | 84    | 75.7  | 73    |
| 377569 | 15.1  | 12    | 15.6  | 18    |
| 377504 | 11.9  | 12.1  | 10.6  | 11    |
| 445319 | 5.8   | 6.2   | 5.4   | 6.5   |
| 445157 |       |       | 2.1   | 1.9   |
| 308667 | 15    | 24.5  | 36.6  | 31.6  |
| 388820 | 11.7  | 9.6   | 11    | 9.4   |
| 383753 | 94.2  | 100.5 | 102.8 | 95.6  |
| 383681 | 2.9   | 2.8   | 1.4   | 2.9   |
| 397969 | 78    | 74.3  | 83.3  | 81.3  |
| 281561 | 54    | 48.9  | 59.4  | 43.1  |
| 374811 | 13.3  | 12.2  | 11.4  | 14.4  |
| 383650 | 35.5  | 43.7  | 44.1  | 44.3  |
| 377282 | 16.2  | 13.9  | 17.1  | 15.9  |
| 384948 | 2.8   | 6.6   | 5.1   | 6.9   |
| 366798 | 2.8   | 6.3   | 8.3   | 6.9   |
| 353831 | 17.1  | 20.6  | 20.1  | 28.3  |
| 353810 | 20    | 24.2  | 29    | 32.5  |
| 436944 | 1.8   | 2.3   | 3     | 2.5   |
| 402904 | 7.1   | 8.5   | 8     | 7.5   |
| 370882 | 191.6 | 322.5 | 349.6 | 301.3 |
| 353774 | 2.3   | 6.7   | 5.1   | 3     |
| 384872 | 2.3   | 2.7   |       | 1.4   |
| 399211 | 45.8  | 61.2  | 54.5  | 70.7  |
| 436844 |       | 1.8   | 1.8   | 1.9   |
| 383212 | 8.4   | 10.8  | 6.9   | 10.1  |
| 343970 | 43.3  | 38    | 42    | 50.4  |
| 261601 | 36.8  | 35.8  | 26.1  | 30    |
| 459519 | 106.1 | 143.4 | 109   | 169.6 |
| 406968 | 2.6   | 2.9   |       | 2     |
| 310075 | 54.1  | 71.6  | 54.5  | 66.6  |
| 383134 | 6.1   | 2.2   | 2.9   | 6     |
| 393267 | 59.6  | 63.2  | 51.3  | 62    |
| 406869 |       | 1.8   |       |       |
| 319382 | 2.6   | 3.4   | 3.1   | 2.3   |
| 393278 | 14    | 17.7  | 15.1  | 17.8  |
| 366254 | 2.3   | 1.7   | 2.4   | 2.3   |
| 398080 | 41.1  | 34.1  | 33.5  | 41.8  |
| 313573 | 40.2  | 34.7  | 51.4  | 40.7  |
| 346169 | 7.4   | 4.5   | 6.7   | 5.4   |
| 380048 | 38.2  | 32.3  | 34.5  | 33.4  |

|        |       |       |       |       |
|--------|-------|-------|-------|-------|
| 408333 | 15.6  | 12.3  | 11.9  | 10.1  |
| 326171 |       |       |       | 1.7   |
| 397579 | 35.8  | 54.2  | 52    | 58    |
| 397502 | 53.4  | 88.6  | 59.8  | 98.5  |
| 397486 | 75.8  | 113.7 | 73.2  | 140.7 |
| 397395 | 55.9  | 127.2 | 90.2  | 153.1 |
| 446787 | 33.8  | 40.6  | 45.1  | 35    |
| 446792 |       | 1.6   | 2.1   | 1.8   |
| 446755 | 139.2 | 192.6 | 229   | 236.6 |
| 312040 | 26.6  | 39.9  | 29.5  | 52.9  |
| 311933 | 29.4  | 44.6  | 39.5  | 66    |
| 475487 | 6.1   | 5.4   | 6.5   | 3.3   |
| 267128 | 57.7  | 66    | 77.6  | 70.1  |
| 267037 | 56    | 69    | 79.8  | 77.4  |
| 266811 | 99.4  | 105.6 | 113.6 | 129.6 |
| 266928 | 63.7  | 81.8  | 102.9 | 109.3 |
| 266929 | 61    | 76.8  | 76    | 84    |
| 267222 | 26.8  | 32.5  | 36.1  | 35.9  |
| 267298 | 20.8  | 24.8  | 30    | 24.1  |
| 267448 | 16.8  | 16.8  | 20.6  | 19.9  |
| 266715 | 21.4  | 39    | 58.4  | 50.2  |
| 476147 | 2.7   | 6.9   | 7.4   | 6.1   |
| 475064 | 30.2  | 32.1  | 27.8  | 35    |
| 265393 | 35.7  | 42.3  | 44.4  | 33    |
| 309702 | 30.9  | 42.4  | 42    | 46.9  |
| 265306 | 22.5  | 32.9  | 40.3  | 27.9  |
| 267368 | 15.9  | 23.2  | 25.4  | 23.6  |
| 267985 | 7.2   | 9.2   | 9.1   | 10.7  |
| 346713 | 36.3  | 39.8  | 38.8  | 49.3  |
| 266812 | 92.2  | 102.2 | 97.3  | 107.8 |
| 267496 | 31.2  | 35    | 34    | 36.2  |
| 397679 | 19.6  | 23.2  | 24    | 33.7  |
| 425844 | 8.9   | 15    | 65.5  | 49.8  |
| 267038 | 79.2  | 93.8  | 87.9  | 96    |
| 397487 | 16.1  | 27    | 18.5  | 35.2  |
| 346863 | 18.1  | 17.9  | 15.5  | 17.6  |
| 346449 | 5.8   | 9.9   | 8.3   | 10.1  |
| 422166 | 52.2  | 47.7  | 43    | 54.9  |
| 374607 | 14.4  | 15.7  | 12    | 15.5  |
| 374922 | 15.9  | 17.4  | 17.2  | 19.2  |
| 374607 | 14.4  | 15.7  | 12    | 15.5  |
| 267299 | 19.1  | 22.5  | 18.2  | 18.7  |
| 346539 | 157.2 | 193.9 | 152.6 | 174.5 |
| 267130 | 57.6  | 67.9  | 54.4  | 74.8  |
| 396714 | 25.4  | 22.2  | 19.2  | 22.6  |
| 345371 | 19.2  | 15.5  | 18.1  | 14.4  |
|        |       |       |       |       |
| 395974 | 19.8  | 23.9  | 17    | 43.5  |
| 346586 | 32.6  | 37.8  | 34.8  | 44.2  |
| 267583 | 26.1  | 28.5  | 27.1  | 29.5  |
| 398128 | 35    | 40.3  | 42.7  | 43.7  |
| 346574 | 125.4 | 148.9 | 141.2 | 183.7 |

|        |       |       |       |       |
|--------|-------|-------|-------|-------|
| 311929 | 135.8 | 164.1 | 193.9 | 230.2 |
| 287191 | 58.8  | 48.4  | 58.7  | 54.7  |
| 398237 | 43.2  | 37.4  | 38.5  | 46.6  |
| 397769 | 21.2  | 28.4  | 24.8  | 35    |
| 267712 | 22.9  | 23.5  | 24    | 21.1  |
| 397835 | 16.1  | 16.5  | 17.1  | 23.4  |
| 267225 | 24    | 27.1  | 27.3  | 31.4  |
| 346850 | 12.3  | 11.7  | 14.4  | 16.9  |
| 309660 | 22.1  | 21    | 23.8  | 22.4  |
| 309660 | 22.1  | 21    | 23.8  | 22.4  |
| 311016 | 91.8  | 84    | 104.8 | 104.1 |
| 345837 | 22.5  | 22.5  | 29.2  | 21.3  |
| 267370 | 22.2  | 25.8  | 28.1  | 33.7  |
| 379742 | 126.9 | 61.4  | 145.2 | 69.7  |
| 425778 | 36.4  | 24    | 53.3  | 26.4  |
| 425773 | 145   | 88.1  | 189.4 | 103   |
| 436808 | 43.3  | 26.2  | 45    | 23    |
| 335919 | 312.6 | 176.6 | 235.1 | 188.6 |
| 474772 | 71.3  | 45.3  | 79.1  | 48.9  |
| 474770 | 65.8  | 53.1  | 66.5  | 55.2  |
| 309944 | 63.5  | 52.2  | 115.3 | 63    |
| 475129 | 154.1 | 114.2 | 204.4 | 112.9 |
| 348404 | 63    | 32.9  | 59    | 35    |
| 405963 | 8.1   | 2.2   | 6.6   | 2.5   |
| 449734 | 19.8  | 15.4  | 18.6  | 19.2  |
| 425732 | 46.7  | 31.9  | 45.6  | 32.5  |
| 347208 | 5.7   | 3     | 3.3   | 2.3   |
| 436776 | 9.7   | 3.2   | 11    | 7.8   |
| 432628 | 6.7   | 4.8   | 5.7   | 5.7   |
| 425738 | 7.4   | 6     | 14    | 7.6   |
| 449499 | 2.6   |       | 3.3   | 2     |
| 396920 | 54.7  | 45.3  | 40.3  | 49.2  |
| 449703 | 19    | 18.9  | 17.8  | 17.1  |
| 374546 | 36.5  | 40.3  | 38.4  | 36.5  |
| 422243 | 30.7  | 29.7  | 30.3  | 33.3  |
| 425663 | 134   | 126.4 | 106.7 | 110.1 |
| 425628 | 16.7  | 18.5  | 19.1  | 20    |
| 345222 | 22.8  | 17.5  | 12.6  | 15    |
| 262844 | 14.3  | 14.7  | 15    | 15.3  |
| 250648 | 6.4   | 7.1   | 7.5   | 8.9   |
| 437464 | 12.7  | 13.1  | 15.2  | 14    |
| 472589 | 6.5   | 6.1   | 6.6   | 6.5   |
| 449494 | 9.1   | 13.5  | 19.1  | 11.5  |
| 463679 |       | 1.6   | 1.5   |       |
| 472443 | 2.4   | 2.6   | 5.5   | 6.7   |
| 437474 |       | 1.7   | 6.4   | 2.1   |
| 389427 | 17.5  | 13.9  | 14.3  | 13.5  |
| 389361 | 33.6  | 27.3  | 39.9  | 26.7  |
| 371593 | 16.6  | 14.4  | 31.4  | 16    |
| 474924 | 119.5 | 90.1  | 120.3 | 88.3  |
| 318443 | 14    | 17.4  | 17.5  | 19.8  |
| 475356 | 47.9  | 44.3  | 54.2  | 46.5  |



|        |       |       |       |       |
|--------|-------|-------|-------|-------|
| 455081 | 11.5  | 7.5   | 12.5  | 15.3  |
| 455203 | 12    | 11.5  | 14.1  | 10.3  |
| 337374 | 448.2 | 376.8 | 513.2 | 369.6 |
| 445354 | 29.3  | 28.3  | 37.2  | 32.9  |
| 371835 | 15.4  | 14.1  | 16.7  | 16    |
| 431910 | 13.8  | 20.5  | 17.8  | 25.2  |
| 434242 | 19.8  | 25.9  | 28    | 22.2  |
| 434095 | 36.8  | 50.4  | 54.4  | 47.5  |
| 433991 | 7.7   | 5.8   | 8.2   | 6.6   |
| 434126 | 6.2   | 8.3   | 8.1   | 9.4   |
| 472391 | 2     | 1.8   | 2.2   | 2     |
| 475137 | 33.2  | 31    | 38.7  | 40.3  |
| 340687 | 38.1  | 55.2  | 50.2  | 59    |
| 434358 | 7.9   | 7.4   | 5.7   | 6.4   |
| 340683 | 38.5  | 42.1  | 34.4  | 46.2  |
| 254126 | 27.2  | 39.2  | 36.8  | 50.2  |
| 472264 | 2.2   | 2.9   | 1.8   | 3     |
| 261315 | 262.3 | 282.4 | 246.8 | 272.6 |
| 261216 | 218.7 | 287.6 | 282.8 | 335   |
| 254042 | 11.4  | 15.7  | 16.8  | 19.6  |
| 428269 | 8.4   | 3     | 8.1   | 10.5  |
| 314478 | 8.4   | 9.9   | 9.6   | 10.5  |
| 437554 | 13    | 7.7   | 13.1  | 10.3  |
| 283550 | 61.4  | 54.3  | 38.6  | 45.8  |
| 297591 | 30.8  | 22    | 26.1  | 24.1  |
| 271026 | 16.3  | 17.3  | 23.9  | 21.6  |
| 270956 | 3.2   |       | 1.7   | 2.3   |
| 307438 | 21.9  | 19.5  | 18.2  | 26.8  |
| 314872 | 9.7   | 8.1   | 13.8  | 8.3   |
|        |       |       |       |       |
| 335782 | 196   | 192.2 | 169.3 | 218.2 |
| 284548 | 12.7  | 13.5  | 19.3  | 17.9  |
| 271094 |       |       |       | 2     |
| 284560 | 99    | 93    | 125.9 | 113.6 |
| 375209 | 16.7  | 18.9  | 17.7  | 16.1  |
| 432324 | 60.1  | 52.4  | 30.4  | 31    |
| 402731 | 6.4   | 7.8   | 7.5   | 7.2   |
| 335765 | 51.5  | 51.8  | 51.4  | 55.7  |
| 432263 | 48.4  | 56.3  | 58.9  | 61.1  |
| 402630 | 17    | 14.8  | 11.8  | 16.6  |
| 287343 | 11.3  | 10.9  | 11.6  | 11.5  |
| 264108 | 16.5  | 22.9  | 23.2  | 25.9  |
| 450775 | 8.3   | 8.9   | 11.8  | 16.2  |
| 447898 | 15.1  | 6.8   | 12.2  | 12.7  |
| 402847 | 28.4  | 24.7  | 19.9  | 24.8  |
| 463816 |       | 1.3   | 1.4   |       |
| 375237 | 75.8  | 79.4  | 85.8  | 81.5  |
| 402691 | 2     |       | 1.6   | 3     |
| 360664 | 5.4   | 6.6   | 6.6   | 7.7   |
| 316109 | 30.4  | 25.1  | 23.1  | 22.1  |
| 316046 | 9.6   | 10.4  | 6.7   | 8.3   |
| 315946 | 34.9  | 31.6  | 41.2  | 28.8  |

|        |      |       |       |       |
|--------|------|-------|-------|-------|
| 264126 | 13.4 | 16.6  | 24.1  | 18.5  |
| 249878 | 37.7 | 41.3  | 39.2  | 40.6  |
| 400901 | 13.2 | 13.1  | 15.2  | 16.9  |
| 328675 | 5.4  | 3     | 5.4   | 2.6   |
| 288399 | 5.6  | 7.5   | 9.1   | 8     |
| 315231 | 21.1 | 22    | 21.7  | 26.7  |
| 263948 | 44.6 | 31    | 47.4  | 37    |
| 462440 | 20.6 | 20.9  | 22.8  | 23.1  |
| 453877 | 25.2 | 37.9  | 24.6  | 39.2  |
| 376394 | 63.6 | 95.4  | 40.4  | 78.7  |
| 378175 | 10.6 | 19    | 11.5  | 14.8  |
|        |      |       |       |       |
| 348894 | 5.4  | 5.1   | 3     | 8.8   |
| 449327 | 23.9 | 38.5  | 20.8  | 38.1  |
| 376410 | 3.1  | 6.4   | 5.9   | 8.6   |
| 384608 | 1.6  | 2.7   |       | 3.2   |
| 403444 | 10.7 | 9     | 12.6  | 12.2  |
| 379192 |      |       | 1.4   | 2.2   |
| 382091 | 6.3  | 2.9   | 7.5   | 5.5   |
| 450536 | 26.1 | 18.7  | 18.2  | 27.1  |
| 462365 | 8.3  | 7.7   | 7.5   | 7.1   |
| 280014 | 40.9 | 41    | 29.5  | 31.2  |
| 426987 | 93.5 | 67.2  | 61.4  | 80.3  |
| 283014 | 52.8 | 42.7  | 55.1  | 45.7  |
| 455685 | 63.3 | 46.3  | 57.6  | 65.7  |
| 287253 | 87.9 | 75.5  | 126.8 | 90.8  |
| 454009 | 72.5 | 98.3  | 89.7  | 117.7 |
| 454093 | 14.3 | 24.5  | 18.1  | 26.4  |
| 455476 | 7.9  | 13.6  | 8.3   | 12.3  |
| 455470 | 18.4 | 29.4  | 25    | 31    |
| 455380 | 44.6 | 37.8  | 24.8  | 35.3  |
| 426279 | 2.3  | 3.1   |       | 3     |
| 431722 | 38.6 | 51.8  | 39.6  | 47.9  |
| 431669 | 17.4 | 35    | 25.9  | 30.1  |
| 475204 | 56.7 | 94.8  | 66.5  | 96.1  |
| 347882 | 6.4  | 12.2  | 8.9   | 15.2  |
| 263844 | 84   | 143.1 | 101.5 | 136.9 |
| 398110 | 67.6 | 152.4 | 107.3 | 142.4 |
| 448245 | 5.3  | 5.5   | 5.8   | 8.2   |
| 285252 | 57.1 | 100.7 | 84.4  | 92.9  |
| 263780 | 79   | 148.2 | 86.3  | 116.7 |
| 475206 | 7.5  | 14.3  | 8.5   | 13.9  |
| 398731 | 14.6 | 10.3  | 9.8   | 10.2  |
| 348057 | 20.6 | 21.1  | 16    | 28    |
| 398032 | 16.5 | 20.8  | 17.9  | 24.4  |
| 431814 | 3.2  | 5.7   | 2.7   | 2.5   |
| 431555 | 26.4 | 31.3  | 24.7  | 28.2  |
| 428921 | 65.7 | 95.8  | 77    | 87.2  |
| 264342 | 11.1 | 10    | 16.6  | 20.1  |
| 455386 | 5    | 5     | 3     | 3     |
| 431534 | 2.7  | 6.7   | 8.2   | 7.2   |
| 285237 | 22.5 | 37.3  | 34.3  | 42.8  |

|        |       |       |       |       |
|--------|-------|-------|-------|-------|
| 452916 | 40.4  | 43.9  | 34.8  | 54.9  |
| 398073 | 20.9  | 30.6  | 23.1  | 29.7  |
| 398175 | 13.8  | 14.9  | 14    | 16.9  |
| 453285 | 42.2  | 62    | 40.6  | 56.5  |
| 285372 | 15    | 22.7  | 15.8  | 19.9  |
| 453045 | 164.6 | 288.5 | 192.2 | 280.6 |
| 453169 | 160.7 | 282.6 | 210.4 | 265.5 |
| 434364 | 17.4  | 25.3  | 18.4  | 25.7  |
| 421925 | 21    | 22.5  | 17.4  | 25    |
| 421917 | 2     | 3.4   | 3.2   | 6.2   |
| 410842 | 13.2  | 17.4  | 16.5  | 15.8  |
| 412888 | 8.2   | 9.2   | 6.8   | 14.3  |
| 412815 | 8.3   | 7.1   | 6.5   | 6.9   |
| 315321 | 55.1  | 65.9  | 42.1  | 64.9  |
| 315277 | 48.4  | 74.1  | 43.1  | 66.1  |
| 315193 | 48.3  | 60.4  | 45.5  | 66.7  |
| 475031 | 96    | 104.8 | 84    | 120.5 |
| 402431 | 6.9   | 12.2  | 10.1  | 13.2  |
| 402421 | 62.6  | 72.5  | 68.4  | 65.6  |
| 431329 | 10.9  | 8.4   | 9.3   | 10.2  |
| 319899 | 3.2   | 9.2   | 7.1   | 9.2   |
| 336030 | 148.2 | 183.8 | 141.7 | 248.3 |
| 410724 | 6.7   | 2.8   | 26.8  | 7.4   |
| 410676 | 1.7   | 1.5   | 1.9   | 2.3   |
| 383383 | 34.6  | 50.2  | 33    | 38    |
| 383305 | 39.8  | 51.7  | 50    | 58.7  |
| 383201 | 27.2  | 27.7  | 29.7  | 37.2  |
| 379891 | 11.1  | 11.5  | 9.2   | 12.8  |
| 379797 | 6.3   | 6.4   | 6.8   | 6.4   |
| 379792 | 16.3  | 17.9  | 15.5  | 18.1  |
| 377413 | 25.1  | 24.9  | 18    | 22.8  |
| 377365 | 120.6 | 129.2 | 123.2 | 120.3 |
| 400061 | 19.8  | 11.7  | 12.2  | 14.8  |
| 399952 | 17    | 26.3  | 25.2  | 26.3  |
| 310031 | 62.2  | 53.4  | 57.2  | 58.2  |
| 337759 | 7     | 10.1  | 6.7   | 8.9   |
| 337720 | 112.3 | 141.8 | 120.9 | 142.5 |
| 383318 | 8     | 11.7  | 10.8  | 14.4  |
| 349910 | 6.1   | 7     | 6.3   | 7.9   |
| 383396 | 6.5   | 6.6   | 6.1   | 6.1   |
| 377456 | 23.6  | 23.4  | 25.3  | 23.1  |
| 379707 | 15.8  | 9.5   | 7.4   | 10.4  |
| 345281 | 7.2   | 10.3  | 10.7  | 10.2  |
| 395869 | 9.5   | 10    | 9.2   | 10.8  |
| 379897 | 1.9   | 5.2   | 2.3   | 2.9   |
| 309923 | 33    | 25.1  | 32.5  | 30.6  |
| 309938 | 22.6  | 20.3  | 21.3  | 30.2  |
| 399997 | 39.1  | 47.1  | 44    | 46    |
| 383210 | 6.8   | 10    | 6.1   | 6.4   |
| 437247 | 15    | 7.6   | 5.9   | 6.9   |
| 432251 | 12.7  | 11    | 9.3   | 10    |
| 432233 | 36.6  | 18.4  | 20.3  | 19.3  |

|        |       |       |       |       |
|--------|-------|-------|-------|-------|
| 432155 | 19    | 13.2  | 10.8  | 13.4  |
| 318778 | 33    | 20    | 16.1  | 17.4  |
| 345148 | 87.7  | 73.8  | 123.2 | 73.5  |
| 345161 | 18    | 16.4  | 28.7  | 15.2  |
| 345297 | 59.8  | 34.5  | 33.1  | 25.6  |
| 345660 | 17    | 9.6   | 12.3  | 10.2  |
| 349585 | 10.9  | 10.4  | 10.6  | 9.9   |
| 474893 | 47.6  | 41    | 68.7  | 38.6  |
| 450435 | 16.1  | 12    | 11.1  | 14.7  |
| 345005 | 56.4  | 59.9  | 63.8  | 73.6  |
| 323170 | 22.4  | 9.6   | 12.1  | 14.7  |
| 474948 | 100.1 | 72.7  | 51.5  | 90.8  |
| 450221 | 7.6   | 6.2   | 8.5   | 3     |
| 449910 | 2.5   | 1.9   | 6.3   | 5.7   |
| 375461 | 8     | 5.3   | 9.1   | 6.7   |
| 341817 | 8.9   | 7.8   | 7.8   | 6.4   |
| 450195 | 32.9  | 24.5  | 32.6  | 31.3  |
| 323044 | 7.4   | 5.4   | 5.9   | 6.9   |
| 342123 | 32.1  | 23.6  | 18.6  | 22.8  |
| 394190 | 80    | 57.5  | 67.7  | 76.3  |
| 371162 | 59.9  | 55.6  | 52.1  | 59.1  |
| 442139 | 1.8   | 2.8   | 2.1   | 3.1   |
| 336155 |       | 1.5   | 2.9   |       |
| 336149 | 23.8  | 19.7  | 20    | 19.2  |
| 335795 | 317   | 287.1 | 326.5 | 279.9 |
| 315472 | 17.7  | 15.1  | 19.7  | 19.5  |
| 348385 | 52.9  | 40.7  | 62.9  | 43.3  |
| 371346 | 133.5 | 91.8  | 86.7  | 94.3  |
| 371359 | 23.2  | 18.7  | 17.1  | 17.2  |
| 431369 | 48.7  | 30.6  | 35.2  | 32.7  |
| 371346 | 133.5 | 91.8  | 86.7  | 94.3  |
| 263796 | 16.7  | 11.3  | 13.4  | 18.2  |
| 279500 | 90.5  | 75    | 98.8  | 78.4  |
| 371559 | 52    | 41.9  | 54    | 37.8  |
| 431283 | 16.2  | 13    | 19.4  | 12    |
| 279487 | 209.6 | 174.5 | 188.9 | 183.9 |
| 360073 | 7     | 6.8   | 3     | 1.9   |
| 359950 |       | 1.9   |       | 1.5   |
| 359910 | 1.3   | 3.2   | 8     | 4.8   |
| 372303 | 62.4  | 42.3  | 41.3  | 49.9  |
| 422222 | 31    | 43.1  | 46.8  | 43.5  |
| 422057 | 48.5  | 53.3  | 58    | 63.1  |
| 422060 | 39.1  | 46.1  | 50.4  | 51.3  |
| 422061 | 33.4  | 40    | 44.1  | 42.1  |
| 446591 | 27    | 38.6  | 41.1  | 41    |
| 446438 | 24.1  | 21.5  | 19.5  | 21.6  |
| 467014 | 12.3  | 18.9  | 22.3  | 20    |
| 467165 | 48.9  | 46.4  | 55.7  | 53.7  |
| 290198 | 23.1  | 21.1  | 24.9  | 25.2  |
| 290343 | 16.8  | 18.2  | 15.4  | 18    |
| 474923 | 38    | 55.9  | 65.1  | 67    |
| 474920 | 246.3 | 334   | 430.2 | 455   |

|        |       |       |       |       |
|--------|-------|-------|-------|-------|
| 258748 | 17.6  | 6.7   | 39.5  | 7.4   |
| 448290 | 10.7  | 10.7  | 11    | 11.7  |
| 431371 | 5.2   | 5.6   | 7.4   | 7.9   |
| 458368 | 12.9  | 20.2  | 21.6  | 23.8  |
| 290803 | 2.8   | 6     | 6.4   | 5.9   |
| 448372 | 5.4   | 7.2   | 7.9   | 8.4   |
| 458543 | 25.3  | 29.5  | 29.6  | 28.6  |
| 458532 | 12.1  | 18.2  | 14.5  | 17    |
| 289718 | 28.3  | 24.1  | 24.3  | 23.1  |
| 290901 | 75.9  | 68.4  | 90.7  | 82.2  |
| 269000 | 14.9  | 11.2  | 13.6  | 13.3  |
| 290073 | 11.6  | 12.1  | 13.9  | 13.2  |
| 458010 | 65.3  | 43.2  | 34.6  | 45.1  |
| 467157 | 8.1   | 9.8   | 8.7   | 9.2   |
| 290787 | 109.8 | 105.7 | 112.8 | 96.6  |
| 290196 | 6.9   | 6.3   | 5.4   | 7.3   |
| 448427 | 8.4   | 3     | 9.2   | 6.1   |
| 433577 | 17.5  | 22.9  | 22    | 29.7  |
| 453442 | 23.8  | 21.2  | 26.9  | 22.5  |
|        |       |       |       |       |
| 431404 | 9.3   | 10.5  | 15.3  | 10.6  |
| 433560 | 7.4   | 14.3  | 17    | 13.1  |
| 429355 | 22.6  | 19.2  | 21.1  | 18.1  |
|        |       |       |       |       |
| 385411 | 2.6   | 2.1   | 2.5   | 2.4   |
| 360300 | 19.2  | 15.6  | 22    | 12    |
| 360294 | 11.5  | 7.4   | 6.1   | 6.1   |
| 407956 | 19.7  | 19.5  | 18.2  | 16.7  |
| 407951 | 25.9  | 17.5  | 17.5  | 17.9  |
| 407592 | 5.4   | 1.6   | 2.1   | 1.4   |
| 409345 | 19.3  | 13.9  | 15.9  | 12.5  |
| 409245 | 27.2  | 25.1  | 35.7  | 26.6  |
| 474935 | 5.5   | 5.7   | 7.1   | 10.2  |
| 474933 | 339.6 | 412.3 | 400.4 | 533.5 |
| 332137 |       | 2.5   | 2.8   | 1.6   |
| 469433 | 39.6  | 21.3  | 25.3  | 19.3  |
| 469455 | 23.1  | 10.9  | 13.8  | 10.3  |
| 460200 | 18.6  | 17.7  | 14.2  | 12.6  |
| 460202 | 84.6  | 66.6  | 73.2  | 60.5  |
| 460356 | 24.8  | 23.4  | 21.1  | 19.1  |
| 460053 | 36.8  | 36.5  | 51.6  | 42.4  |
| 475144 | 2.4   | 1.9   | 3.1   | 1.5   |
| 475142 | 129.9 | 123.7 | 128.1 | 115.8 |
| 475362 | 14.3  | 13.7  | 11    | 15.3  |
| 475338 | 55.7  | 56.9  | 56.9  | 81.5  |
| 360434 | 9     | 7     | 9.3   | 8.2   |
| 453499 | 33.5  | 24.7  | 32.4  | 27.3  |
| 464993 | 7.4   | 4.9   | 6.4   | 5.3   |
| 409222 | 7     | 7.6   | 10.8  | 7.7   |
| 409360 | 3.1   | 3.4   | 2.7   | 2.2   |
| 454558 | 18    | 8.6   | 13.3  | 15.7  |
| 385529 | 3.4   | 3     | 3.2   | 2.4   |

|        |       |       |       |       |
|--------|-------|-------|-------|-------|
| 460050 | 7.2   | 8.4   | 10.5  | 3.3   |
| 383943 | 6.3   | 6.3   | 8.8   | 6.8   |
| 249271 | 24.1  | 19.9  | 29.4  | 17.4  |
| 469279 | 60.9  | 61.2  | 82.9  | 73.4  |
| 282492 | 25.2  | 31.8  | 38    | 34.8  |
| 407813 | 2.3   | 2.3   | 3     | 2.5   |
| 262950 | 30.7  | 30.5  | 37.9  | 38    |
| 454677 | 10.2  | 9.4   | 9.3   | 10    |
| 393426 | 23.5  | 21.8  | 27.9  | 23    |
| 250581 | 163.7 | 165.4 | 214.6 | 197   |
| 395306 | 273.9 | 206.3 | 229.5 | 185.6 |
| 457570 | 16.7  | 14.5  | 15.6  | 15.5  |
| 457831 | 39.8  | 32.1  | 36.8  | 29.5  |
| 457859 | 60.2  | 53.8  | 65.4  | 51.9  |
| 457749 | 7.2   | 3.1   | 6.6   | 3.2   |
| 457675 | 39.3  | 30.2  | 33.4  | 26.7  |
| 457701 | 110.8 | 85.5  | 109.8 | 80.9  |
| 372145 | 22.4  | 16.2  | 15    | 16.8  |
| 444204 | 2.8   | 2.9   | 6.3   | 2.4   |
| 444299 | 6.2   | 3.2   | 4.7   | 5.9   |
| 436373 | 20.1  | 15.3  | 14.8  | 13.5  |
| 436355 | 33    | 19.4  | 27    | 22.3  |
| 441855 | 33.5  | 24    | 30.4  | 24.3  |
| 448873 | 39.7  | 31.2  | 43.2  | 37.4  |
| 448879 | 15    | 13.1  | 13.9  | 12.9  |
| 445877 | 5.5   | 3     | 3.2   | 3     |
| 327100 | 19.6  | 17.3  | 19.1  | 15.7  |
| 474698 | 48.9  | 45.2  | 45.1  | 56.2  |
| 471325 | 6.8   | 5     | 4.9   | 6.8   |
| 459315 | 35    | 35.7  | 40.9  | 38.1  |
| 458001 | 11.2  | 5.6   | 6.3   | 3.4   |
| 458030 | 19.4  | 16.2  | 15.3  | 19    |
| 326926 | 2.4   | 5.5   | 6.2   | 2.5   |
| 436227 | 5.5   |       |       | 2     |
| 441973 | 5.5   | 5.3   | 6.3   | 5.9   |
| 395270 | 18.7  | 16.4  | 19.9  | 16.2  |
| 471480 | 2.4   | 6     | 3.5   | 3.5   |
| 338815 | 105.3 | 108.3 | 160.6 | 116.7 |
|        |       |       |       |       |
| 424564 | 39.5  | 27.2  | 33.5  | 27.4  |
| 394926 | 19.5  | 20.5  | 13.3  | 17.8  |
| 337895 | 87    | 98.2  | 144.5 | 100.7 |
| 441729 | 3.3   | 3.2   | 7.8   | 3.3   |
| 456680 | 26.4  | 22    | 19.8  | 33.7  |
| 459433 | 14.2  | 10.1  | 11.5  | 12    |
| 471030 |       | 2.3   |       | 1.8   |
| 436236 | 9.2   | 9.1   | 6.1   | 7.6   |
| 441860 | 3.2   |       | 1.7   |       |
| 466528 | 5.2   | 1.7   | 1.5   | 2.9   |
| 380762 | 48.3  | 60.2  | 49.1  | 57    |
| 380758 | 73    | 81.2  | 60.1  | 76.9  |
| 457758 | 43    | 58.1  | 39.1  | 48.9  |

|        |       |       |       |       |
|--------|-------|-------|-------|-------|
| 353846 | 15.6  | 16.6  | 11.9  | 16    |
| 353720 | 2.5   | 5.3   | 3     | 8.5   |
| 442435 | 51.6  | 69.4  | 59.2  | 71.4  |
| 442446 | 12.1  | 18.9  | 15.2  | 18.9  |
| 417214 | 10.8  | 15.7  | 12.6  | 13    |
| 466104 | 6.8   | 10.1  | 10.6  | 9.3   |
| 466137 | 6.4   | 6.7   | 6.6   | 8.8   |
| 466248 | 14.1  | 18.3  | 15.4  | 15.1  |
| 474722 | 69.9  | 94    | 97.4  | 108.9 |
| 474721 | 91.8  | 133.3 | 142.2 | 166.6 |
| 350227 | 27.6  | 27.6  | 20.3  | 32.9  |
| 350221 | 46.5  | 50.6  | 33.8  | 47.8  |
| 422472 | 2     | 3.3   | 7.3   | 3.2   |
| 417219 | 6.4   | 6.7   | 10.2  | 9.3   |
| 466142 | 6.3   | 7.8   | 10.1  | 8.6   |
| 344520 | 65.4  | 73.5  | 54    | 71.5  |
| 259062 | 17.4  | 15.4  | 16.1  | 18.3  |
| 336358 | 9.2   | 12.5  | 15.8  | 16.4  |
| 454222 | 7.3   | 5.8   | 16.9  | 13.4  |
| 380664 | 20.8  | 25    | 18.1  | 25.9  |
| 457622 | 6.4   | 6.2   | 7.8   | 6.6   |
| 457607 | 10.8  | 22.2  | 19    | 21.1  |
| 310148 | 90.4  | 112.3 | 96.4  | 116.3 |
| 350081 | 2.4   | 2.4   | 3.1   | 6     |
| 365731 |       | 2.2   | 2     | 2.1   |
| 431067 | 42.7  | 43.5  | 49.6  | 46.7  |
| 425111 | 14.6  | 16.8  | 11.4  | 12.5  |
| 425061 | 9.7   | 10.5  | 6.6   | 11.7  |
| 433282 | 28.5  | 30.8  | 19.7  | 30.5  |
| 433214 | 23.5  | 27.3  | 28.6  | 24.2  |
| 433379 | 11.5  | 9.5   | 12.1  | 11.3  |
| 319781 | 17.9  | 19.2  | 18.8  | 18.8  |
| 335501 | 197.6 | 232.4 | 275.1 | 251   |
| 425110 | 48.8  | 47.7  | 47.9  | 50.8  |
| 405838 | 17    | 29.2  | 25.1  | 31.5  |
| 320951 | 9.5   | 12.2  | 8.7   | 11.3  |
| 461566 | 13.5  | 11.2  | 14.4  | 17.6  |
| 425062 | 52.4  | 38.4  | 38.1  | 43.8  |
| 431079 | 13.1  | 10.7  | 8.7   | 16.1  |
| 349456 | 3     | 2.1   | 2.5   | 6.3   |
| 459632 | 6.1   | 5.5   | 3.3   | 7     |
| 405899 | 11.7  | 16.6  | 12.7  | 11.4  |
| 370396 | 25.4  | 26.4  | 22.7  | 32.6  |
| 370390 | 83.4  | 86.2  | 78.4  | 107.7 |
| 310986 | 30.6  | 51.7  | 56.4  | 69.9  |
| 310563 | 20.7  | 32.4  | 34.1  | 47.1  |
| 264352 | 84.5  | 125.1 | 98.2  | 147.5 |
| 459919 | 32.3  | 28.1  | 34.3  | 36.3  |
| 267984 | 42.1  | 32.4  | 46.3  | 38.9  |
| 269722 | 89.7  | 105.4 | 100.3 | 129.6 |
| 429929 | 63.4  | 93.3  | 71    | 90.7  |
| 264169 | 42.5  | 54.6  | 42.4  | 63.9  |

|        |       |       |       |       |
|--------|-------|-------|-------|-------|
| 269702 | 102.1 | 137.3 | 136.5 | 181.4 |
| 269655 | 22.1  | 32.1  | 26.1  | 31.7  |
| 329147 | 6     | 3.5   | 3.5   | 6     |
| 250685 | 24.8  | 28.9  | 23    | 29.3  |
| 290390 | 17.6  | 22.8  | 20.5  | 27.6  |
| 290339 | 5.7   | 8.7   | 7.5   | 15.7  |
| 253528 | 11.7  | 15.3  | 20    | 17.2  |
| 329256 | 6.7   | 8.5   | 7.7   | 6.6   |
| 429869 | 10.6  | 17.3  | 15.1  | 16.3  |
| 398853 | 66.5  | 61.1  | 78.5  | 57.4  |
| 398846 | 10.3  | 7     | 10.7  | 7.8   |
| 374510 | 45.6  | 36.7  | 39.1  | 36.6  |
| 414246 | 1.6   | 1.6   | 3     |       |
| 415033 | 12.1  | 9.8   | 13.2  | 11.1  |
| 468328 | 9.7   | 8.8   | 12.5  | 10.9  |
| 468346 | 16.8  | 14.9  | 22.4  | 18.8  |
| 377138 | 24.2  | 19.4  | 31.6  | 24.6  |
| 425156 | 15.8  | 13.3  | 15    | 13.4  |
| 336572 | 265.1 | 210.5 | 243.9 | 195.9 |
| 313340 | 63.7  | 44.1  | 38.7  | 41.1  |
| 470035 | 48.4  | 31.1  | 44.3  | 34.9  |
| 465910 | 7.2   | 3     | 5.1   | 2.6   |
| 451716 | 7.9   | 7.9   | 8.4   | 7.5   |
| 451809 | 11.4  | 11.6  | 10    | 9.6   |
| 452168 | 10    | 6.9   | 7.3   | 9.8   |
| 451590 | 14.2  | 14.5  | 21.1  | 13.5  |
| 452901 | 26.4  | 25.6  | 25.7  | 23.7  |
| 453040 | 24.1  | 21.1  | 28.1  | 26.4  |
| 453085 | 22.7  | 18.8  | 22.2  | 21.5  |
| 452313 | 9.1   | 6.5   | 7.5   | 16.5  |
| 452646 | 16.7  | 13.8  | 10.2  | 17.4  |
| 452742 | 11.7  | 10.1  | 8.7   | 10    |
|        |       |       |       |       |
|        |       |       |       |       |
|        |       |       |       |       |
| 450663 | 10.5  | 9.2   | 6.8   | 7.9   |
| 451343 | 8.1   | 6.8   | 6.1   | 11.6  |
| 451264 | 9     | 7.4   | 7.5   | 11.1  |
| 450856 | 7.1   | 6.1   | 5.8   | 7.4   |
| 450926 | 92.9  | 76.9  | 124.8 | 83    |
| 450942 | 3.2   | 3.2   | 5.5   | 2     |
| 457629 | 2.4   | 1.3   |       | 1.6   |
| 453980 | 29.9  | 30.2  | 41.7  | 28.5  |
| 453888 | 20.9  | 20.7  | 22.8  | 20.7  |
| 453802 | 31.5  | 34.9  | 39.1  | 29.5  |
| 453826 | 8.9   | 8.2   | 13.3  | 10.7  |
|        |       |       |       |       |
| 453506 | 9.2   | 8.1   | 9.1   | 12.4  |
| 453432 | 8.4   | 7.2   | 8.9   | 11.9  |
| 453646 | 25.4  | 22.6  | 32.9  | 23.7  |
| 453676 | 66.3  | 60.4  | 68.6  | 61.8  |
| 453700 | 14.7  | 15.9  | 23.1  | 14.3  |



|        |       |       |       |       |
|--------|-------|-------|-------|-------|
| 453640 | 246.4 | 243   | 359.7 | 262.7 |
| 453533 |       |       | 1.7   |       |
| 428562 | 27.2  | 21.3  | 22    | 20.7  |
| 427551 | 2.6   | 1.3   | 3     | 1.4   |
| 427525 | 47.1  | 28.1  | 38.4  | 28.5  |
| 427428 | 11.2  | 7.7   | 9     | 10.4  |
| 430250 |       |       |       | 1.5   |
| 430318 | 19.9  | 17.7  | 28.9  | 20.7  |
| 430220 | 12.3  | 7.4   | 8.9   | 7.4   |
| 430351 |       | 1.7   |       | 1.3   |
| 422569 | 16    | 21.2  | 25.5  | 20.1  |
| 422568 | 10.1  | 10.6  | 13.7  | 11.8  |
| 405917 | 38    | 34.5  | 44.4  | 46.6  |
| 405842 | 12.4  | 10.6  | 9.3   | 13.1  |
| 405837 | 25.9  | 27.3  | 28    | 28    |
| 405747 | 26.3  | 31.4  | 30.9  | 38    |
| 446846 | 253.7 | 309.4 | 355.4 | 356.2 |
| 446851 | 13    | 16.8  | 14.9  | 14.9  |
| 406015 | 7.5   | 5.6   | 7.2   | 8.8   |
| 404935 |       |       | 1.7   |       |
| 446845 | 37.3  | 42.8  | 48.4  | 51.3  |
| 446736 | 8     | 10.7  | 10.7  | 9.6   |
| 448810 | 29.1  | 25.7  | 32.8  | 47.2  |
| 399621 | 36.3  | 57.9  | 63.6  | 66.4  |
| 446460 | 55    | 56.7  | 62.1  | 55.7  |
| 446470 | 82.1  | 93.3  | 94.4  | 100.2 |
| 446472 | 221.2 | 268.2 | 260.7 | 305.9 |
| 324807 | 18.9  | 21.7  | 18.4  | 20.2  |
| 324805 | 25.1  | 22.7  | 21.6  | 25.9  |
| 324791 | 42.7  | 45.8  | 47.9  | 44.9  |
| 324703 | 16.3  | 17    | 20.5  | 14.7  |
| 324648 | 18.8  | 22.9  | 21.7  | 21.4  |
| 324643 | 15    | 18.1  | 20.2  | 19.9  |
| 324941 | 24.5  | 28.4  | 27.6  | 23.8  |
| 324953 | 13.3  | 15.6  | 13.3  | 16.5  |
| 325393 | 10.8  | 10.4  | 7.6   | 7.9   |
| 325293 | 13    | 11.4  | 9.2   | 13.3  |
| 325179 | 6.8   | 7.1   | 7.4   | 6.6   |
| 325051 | 41.1  | 40.2  | 32.3  | 35.9  |
| 324955 | 20.5  | 20.4  | 21.4  | 22.8  |
| 324628 | 44.9  | 49.2  | 50.2  | 47.8  |
| 324527 | 8     | 8.5   | 10.1  | 8.7   |
| 324331 | 5.5   | 2.7   | 2.9   | 2.1   |
| 474811 | 48    | 54.3  | 52.9  | 58.5  |
| 314031 | 41.1  | 32.4  | 31.4  | 39.4  |
| 312958 | 104.8 | 102.7 | 103.3 | 102.2 |
| 312968 | 28    | 28.1  | 29.8  | 31.6  |
| 313117 | 20.5  | 23.1  | 23.7  | 25.5  |
| 313107 | 88.1  | 88.6  | 83.4  | 92.6  |
| 312251 | 1.8   | 1.9   | 5.7   | 2.1   |
| 349202 | 14    | 11.1  | 9.5   | 9.2   |
|        |       |       |       |       |

|        |       |       |       |       |
|--------|-------|-------|-------|-------|
| 348387 | 96    | 99.1  | 88.1  | 84.2  |
| 278751 | 5.4   |       | 12.3  |       |
| 336556 | 127.4 | 108.8 | 87.5  | 111.5 |
| 252557 | 9.6   | 10.3  | 13.9  | 14.7  |
| 451481 | 9.3   | 6.2   | 8.5   | 11    |
| 305174 | 63.9  | 61.2  | 60.7  | 72    |
| 381667 | 1.9   | 2     |       | 1.5   |
| 247025 | 81    | 60.4  | 57.5  | 66.7  |
| 337829 | 62.4  | 59.3  | 63.5  | 61.8  |
| 312842 | 49.1  | 46.1  | 58.9  | 52    |
| 453531 | 3.3   | 1.4   | 2.1   | 2.3   |
| 288689 | 3.1   | 6.7   | 6.2   | 5.3   |
| 348450 | 21.2  | 13.9  | 16.6  | 11.6  |
| 398151 | 88.5  | 111.1 | 120.4 | 127.7 |
| 454001 |       |       |       | 1.6   |
| 372470 | 64.2  | 71.2  | 64.9  | 91.6  |
| 312246 | 75.6  | 72    | 88.4  | 66.3  |
| 369271 | 44.5  | 55    | 62.3  | 64.7  |
| 427835 | 66.6  | 69    | 69.5  | 65.5  |
| 246896 | 76.2  | 83.5  | 99.8  | 108.4 |
| 450651 | 2.6   | 2.4   | 1.8   | 2.5   |
| 452467 | 16.8  | 14    | 13.4  | 22.3  |
| 345730 | 53.1  | 40.9  | 38.5  | 47.1  |
|        |       |       |       |       |
| 399723 | 153   | 135.7 | 127.9 | 150.7 |
| 427678 | 227.4 | 245.8 | 259.6 | 261   |
| 311095 | 78.9  | 71.2  | 63.1  | 88.1  |
| 257438 | 1.3   | 1.9   |       |       |
| 393029 | 17.6  | 23.8  | 30.2  | 29.4  |
| 405670 | 11.3  | 10.4  | 9.2   | 11.8  |
| 349075 | 5.5   | 7.1   | 3     | 5.7   |
| 375418 | 37.1  | 47.2  | 44.7  | 37.7  |
| 427484 | 151.8 | 243.6 | 318.3 | 307.9 |
| 452252 | 7.6   | 6.1   | 5.4   | 6.1   |
| 423565 | 17    | 17.7  | 21.1  | 25.4  |
| 246765 | 15.4  | 28.3  | 34.3  | 30.1  |
| 398866 | 26.7  | 22.9  | 37    | 24.6  |
| 450867 |       |       |       | 1.6   |
| 312631 | 64.8  | 47.1  | 49.1  | 50.2  |
| 430527 | 8.6   | 5.2   | 2.8   | 5.7   |
| 453361 | 11.6  | 9.2   | 8.5   | 13    |
| 399679 | 172.2 | 177.2 | 163.4 | 159   |
| 260338 | 28.4  | 32.2  | 37.1  | 37.8  |
| 339642 | 10    | 19.4  | 19    | 26.6  |
| 398045 | 85.7  | 79.8  | 99    | 76.8  |
| 456550 | 1.5   | 1.6   | 1.4   | 1.6   |
| 288684 | 25.9  | 25.2  | 34.6  | 27.1  |
| 375494 | 62    | 53.1  | 53.3  | 42.8  |
| 429572 | 5.5   | 7.7   | 3.4   | 6     |
| 455049 | 9.5   | 5.3   | 7.2   | 6.5   |
| 288581 | 26    | 19    | 21.4  | 15.7  |
| 427560 | 180.1 | 203.6 | 161.3 | 160.5 |

|        |       |       |       |       |
|--------|-------|-------|-------|-------|
| 324476 | 2.2   | 1.9   | 2.6   | 5.1   |
| 453912 | 1.6   |       |       |       |
| 406021 |       | 2     | 1.8   |       |
| 325070 | 2.5   | 2.8   | 2.3   | 2.1   |
| 427598 | 189.7 | 196.4 | 198.4 | 219.4 |
| 312133 | 28.2  | 34.3  | 35.3  | 27.5  |
| 324856 | 2.5   |       | 2.2   |       |
| 427753 | 165.3 | 136.8 | 172.7 | 153   |
| 325641 | 1.6   |       | 2.6   | 3.1   |
| 428770 | 15.8  | 12.5  | 12.8  | 14.4  |
| 451017 | 56    | 39.8  | 54.7  | 58.9  |
| 258757 | 21.8  | 15.4  | 25.2  | 22.3  |
|        |       |       |       |       |
| 264651 | 5.5   | 2.2   | 3.3   | 2.6   |
| 450315 | 40.9  | 37.5  | 45.7  | 41.2  |
| 383179 | 12.9  | 9.6   | 2.3   | 8.8   |
| 383106 | 2.1   | 2.1   |       | 1.8   |
| 379252 | 43.6  | 47.1  | 21.9  | 54.7  |
| 396165 | 194   | 213.3 | 113.9 | 183.6 |
| 396126 | 96.5  | 112.3 | 37.3  | 103.8 |
| 396056 | 192   | 281.8 | 104   | 240.6 |
| 397453 | 72.3  | 117.9 | 26    | 44.5  |
| 455489 | 24    | 24.8  | 17.7  | 25.2  |
| 373432 | 121   | 129.5 | 53.5  | 114.8 |
| 436553 | 6.5   | 5.5   | 3     | 3.1   |
| 434823 | 9.5   | 13    | 6.2   | 12    |
| 434748 | 65.1  | 82.4  | 29.3  | 95    |
| 438175 | 43.3  | 56    | 22.9  | 62.1  |
| 438174 | 52.5  | 75.6  | 22.8  | 67.9  |
| 434694 | 47.6  | 72.9  | 28.7  | 67.3  |
| 433895 | 2.6   | 3.1   |       | 3.2   |
| 433593 | 41.6  | 48.4  | 19.1  | 43.8  |
| 433525 | 57.8  | 77.6  | 25.1  | 70.3  |
| 433473 | 80.6  | 116.6 | 43.5  | 100.2 |
| 433381 | 50    | 87    | 30.4  | 87.9  |
| 408041 | 5.7   | 8.7   | 2.5   | 10.4  |
| 406905 | 5.9   | 9.7   | 5.6   | 10.5  |
| 406901 | 15.5  | 16    | 12.6  | 17.8  |
| 403906 | 10.4  | 11.5  | 7.8   | 16.7  |
| 410793 | 10.4  | 5.9   | 1.9   | 2.8   |
| 410056 | 20    | 18.6  | 16.8  | 19.9  |
| 409919 | 9.5   | 11.1  | 6.4   | 11.3  |
| 409774 | 10.6  | 12    | 9.6   | 11.5  |
| 414550 |       | 1.7   |       | 1.6   |
| 412411 | 11.9  | 16.2  | 5.8   | 16.2  |
| 412496 | 8.8   | 13.5  | 5.5   | 12.4  |
| 334598 | 155.2 | 193.8 | 105.8 | 233.3 |
| 284586 | 70.5  | 87.1  | 41.6  | 89    |
| 284470 | 88.9  | 104.3 | 53.9  | 104.9 |
| 335232 | 224.2 | 237.5 | 132.4 | 246.7 |
| 308189 | 119.3 | 124.4 | 47.9  | 132.4 |
| 293100 | 42    | 23.4  | 13.9  | 10.8  |

|        |       |       |      |       |
|--------|-------|-------|------|-------|
| 293103 | 74.1  | 38.6  | 23.4 | 20.6  |
| 292841 | 29.9  | 37.5  | 12   | 32.9  |
| 292847 | 34.3  | 38.9  | 12.3 | 44.2  |
| 293691 | 23.3  | 13.7  | 7.8  | 10.2  |
| 292689 | 34    | 49.8  | 14.2 | 50.7  |
| 292234 | 2.5   | 5.3   | 1.8  | 5.4   |
| 292535 | 12.3  | 15.2  | 9.2  | 17.3  |
| 292539 | 9.8   | 18.1  | 8.6  | 20.6  |
| 292686 | 23.1  | 33.8  | 10.8 | 33.1  |
| 292413 | 33.1  | 42.7  | 18.4 | 37.2  |
| 347789 | 23.6  | 41.1  | 17.4 | 43.8  |
| 349227 | 7.4   | 7.1   | 5.9  | 11.5  |
| 347901 | 23.6  | 31.4  | 10.5 | 30.4  |
| 347978 | 61.2  | 87.8  | 32.9 | 87.2  |
| 348078 | 12.1  | 22.2  | 6.5  | 19.1  |
| 348782 | 13    | 8.2   | 5.1  | 2.1   |
| 348643 | 10    | 10.1  | 7.1  | 3.2   |
| 348597 | 13.3  | 14.1  | 10   | 16.7  |
| 348819 | 14.6  | 15    | 11.7 | 12.6  |
| 348949 | 5.6   | 5.6   | 7    | 6.3   |
| 348925 | 15.4  | 13.2  | 10.1 | 13.1  |
| 348302 | 12.5  | 11.8  | 6.3  | 17    |
| 348153 | 62.6  | 82.2  | 34.8 | 81.1  |
| 348464 | 16.9  | 16.7  | 12.9 | 21    |
| 458764 | 49.7  | 55.2  | 16.8 | 49.3  |
| 339173 | 17.4  | 25.4  | 8.1  | 22    |
| 339191 | 46.8  | 52.2  | 18.7 | 45.1  |
| 338901 | 116   | 191.3 | 76.2 | 181.4 |
| 433076 | 10.9  | 10.5  | 5.6  | 8.9   |
| 433335 | 14.9  | 27.4  | 17.2 | 29.4  |
| 284455 | 100.8 | 146.5 | 55.5 | 135.8 |
| 428056 | 67.4  | 94.6  | 35.1 | 80.9  |
| 423704 | 15.6  | 14.7  | 8.4  | 15    |
| 431034 | 9.8   | 8.5   | 4.7  | 5.9   |
| 284680 | 44.4  | 52.5  | 32.3 | 49.7  |
| 393484 | 36.2  | 36.4  | 20.6 | 31.5  |
| 347735 | 5.8   | 8.9   | 2.8  | 12.4  |
| 438285 | 3     | 7.3   | 5.7  | 7.9   |
| 400663 | 28.7  | 43.4  | 19   | 41.5  |
| 284570 | 83.6  | 106.3 | 50.1 | 100.9 |
| 400541 | 58.6  | 68.4  | 22.9 | 66    |
| 428319 | 67.9  | 94.1  | 29.1 | 80.3  |
| 379155 | 2.1   | 2.6   | 1.6  | 2.7   |
| 409793 | 7.8   | 15    | 6.8  | 17.2  |
| 393227 | 34    | 46.1  | 25.7 | 51.1  |
| 308070 | 103.6 | 113   | 73.9 | 117.9 |
| 284811 | 58.4  | 66.8  | 55.8 | 68.7  |
| 458779 | 85.3  | 91.4  | 27.5 | 73.1  |
| 403882 | 8.6   | 5.3   | 8.1  | 6.1   |
| 284926 | 42.1  | 42.3  | 30.2 | 46.2  |
| 455607 | 24.4  | 16.5  | 13.6 | 20.7  |
| 425090 | 96.5  | 86.4  | 64   | 92.6  |

|        |       |       |      |       |
|--------|-------|-------|------|-------|
| 448102 | 11.8  | 14    | 9.3  | 15.1  |
| 438032 | 7.8   | 7.2   | 5.8  | 9     |
| 458641 | 23.8  | 49.2  | 21.8 | 45.6  |
| 453485 | 24.5  | 32.2  | 14.7 | 28    |
| 292980 | 7.8   | 10.1  | 8.7  | 10.3  |
| 373300 | 54.9  | 74.8  | 43.5 | 79    |
| 316801 | 24.9  | 32.1  | 16.1 | 28.8  |
| 425033 | 53.4  | 54.1  | 33.6 | 52.7  |
| 403975 | 2.6   | 2     | 1.6  |       |
| 449204 | 24.7  | 31.9  | 13.9 | 27.3  |
| 451989 | 71.3  | 86.7  | 44.9 | 104.8 |
| 393577 | 91.8  | 145.9 | 38.9 | 69.5  |
| 292617 | 3.2   | 6.7   | 8.3  | 6.3   |
| 318601 | 82.8  | 98.7  | 68.1 | 111.4 |
| 371414 | 13    | 11.1  | 11.3 | 12.8  |
| 383181 | 6     | 2.8   | 1.5  | 5.9   |
| 385630 | 6     | 5.8   | 2.6  | 2.6   |
| 306269 | 18.7  | 14.9  | 10.2 | 16.1  |
| 383400 |       |       |      | 1.5   |
| 369635 | 69.8  | 72.6  | 50.3 | 73.3  |
| 400551 | 102.5 | 105.7 | 34.9 | 99.2  |
| 431055 | 6.9   | 8.1   | 2.9  | 7.3   |
| 428220 | 12.1  | 14.9  | 10.4 | 18.1  |
| 433693 | 10.3  | 10.1  | 7.1  | 10.4  |
| 409938 | 1.8   | 5.8   | 1.9  | 5.5   |
| 400776 | 13.6  | 18.1  | 7.3  | 17    |
| 400096 | 127.7 | 189.2 | 80.8 | 198.4 |
| 427976 | 127.6 | 168   | 65.2 | 148.8 |
| 282503 | 22.7  | 20.6  | 31.8 | 24.8  |
| 383501 | 1.5   |       |      |       |
| 450378 | 10.8  | 9.6   | 9.1  | 11.6  |
| 400442 | 9.9   | 16.5  | 10.2 | 21.5  |
| 400110 | 106   | 148.8 | 65.7 | 144.8 |
| 292833 | 34.6  | 31    | 23.3 | 35    |
| 427917 | 20.1  | 32.7  | 15   | 27.7  |
| 284364 | 29.3  | 33.1  | 25.7 | 33.4  |
| 429280 | 45.4  | 33.9  | 25.9 | 26.2  |
| 410505 | 3.4   | 7.1   | 6    | 6.7   |
| 385651 | 1.4   | 1.9   | 2.1  | 1.7   |
| 293182 | 5.5   | 8.2   | 2.4  | 6.9   |
| 436564 | 2.5   | 2.7   | 1.8  | 1.6   |
| 461473 |       | 2.9   | 2    | 2.6   |
| 403891 | 10.3  | 6.3   | 5.6  | 9     |
|        |       |       |      |       |
| 307095 | 19.7  | 22.5  | 16.3 | 29.5  |
| 436647 | 2.4   | 1.5   |      | 2.5   |
| 406797 |       |       |      | 2.5   |
| 292765 | 14    | 16.7  | 8    | 18.7  |
| 318454 | 132   | 201.7 | 95.6 | 223.5 |
|        |       |       |      |       |
|        |       |       |      |       |
|        |       |       |      |       |

|        |       |       |       |       |
|--------|-------|-------|-------|-------|
| 324531 | 2.4   | 5.8   | 20.9  | 5.6   |
| 284508 | 136.9 | 170.6 | 99.1  | 139.8 |
| 309269 | 35    | 26.6  | 55    | 28.5  |
| 348430 | 55.5  | 57    | 207.7 | 58.4  |
| 346027 | 19.9  | 22.2  | 61.4  | 22.7  |
| 280711 | 54    | 46.9  | 69.8  | 67.5  |
| 345252 | 21.5  | 21.1  | 28.1  | 24    |
| 343735 | 28.1  | 23.8  | 131.7 | 28.5  |
|        |       |       |       |       |
| 263938 | 2.3   | 1.5   | 2.1   | 1.8   |
| 282628 |       |       | 1.7   |       |
| 379820 | 33.5  | 28.8  | 250.7 | 33.9  |
| 448258 | 6.9   | 1.8   | 2.4   | 3.1   |
| 374909 | 14.9  | 14.2  | 40.7  | 14.2  |
| 437144 | 9.8   | 7.3   | 16.8  | 9.3   |
| 437123 | 10.8  | 10.4  | 58.4  | 13.3  |
| 402370 | 27.3  | 25.5  | 45.9  | 23    |
| 422198 | 25.2  | 23.3  | 99    | 25.9  |
| 322428 | 7.8   | 2.9   | 16.1  | 7.3   |
| 268825 | 60.1  | 35.4  | 142.4 | 48.8  |
| 397535 | 16.7  | 17.4  | 36.8  | 17.2  |
| 268725 | 23.5  | 16.6  | 50.7  | 23.6  |
| 268631 | 32.7  | 22.3  | 62.8  | 25    |
| 437034 | 2.4   |       | 8.6   | 1.9   |
| 314932 | 13.4  | 15.2  | 48.5  | 11    |
| 448639 | 2.6   | 2.8   | 8.3   | 8.6   |
| 452616 | 2.9   | 2.8   | 5.7   | 3.3   |
| 314497 | 17.6  | 17.5  | 44.8  | 19.2  |
| 374810 | 49.2  | 39.3  | 93.3  | 43.6  |
| 265351 | 39.7  | 40    | 230.3 | 46.4  |
| 409949 | 2.6   | 2.3   | 9.9   | 2     |
| 314912 | 2.2   | 1.7   | 15    | 1.8   |
| 377192 | 7.7   | 8.4   | 18.4  | 9.3   |
| 371208 | 32.7  | 29.3  | 29.3  | 32    |
| 437269 | 1.7   | 1.6   | 1.6   | 2.1   |
| 335080 | 67    | 57.8  | 64.5  | 67.7  |
| 334203 | 164.3 | 138.3 | 163.4 | 125.7 |
| 472987 | 5.7   | 3     | 5.8   | 2.4   |
| 349968 | 6.9   | 8.9   | 8.6   | 7.7   |
| 336338 | 167.5 | 145.6 | 168.3 | 157   |
| 268485 | 25.7  | 20    | 25.1  | 21.1  |
|        |       |       |       |       |
| 284768 | 14.7  | 6.8   | 12    | 6.6   |
| 269313 | 1.8   | 2     |       |       |
| 292139 | 14.3  | 12.1  | 9.7   | 14.8  |
| 349531 | 8.5   | 5.4   | 9.4   | 5.7   |
| 292185 | 57.9  | 45.6  | 53.2  | 51.2  |
| 293269 | 47.6  | 41.8  | 61    | 44.5  |
| 292124 | 53.4  | 48.9  | 63.3  | 59.4  |
| 268414 | 1.4   | 2.7   | 1.8   | 2.4   |
| 429751 | 16.5  | 15.5  | 15.5  | 16.9  |
| 470058 |       | 1.4   | 2.2   | 1.8   |

|        |       |       |       |       |
|--------|-------|-------|-------|-------|
| 280962 | 26.1  | 34.5  | 43.9  | 41.3  |
| 372574 | 24.6  | 22.8  | 24.1  | 23.1  |
| 346492 | 39    | 48.4  | 49.5  | 53.5  |
| 430177 | 15.4  | 16.2  | 13.3  | 18.9  |
| 385771 | 8.2   | 7.3   | 7.8   | 9.2   |
|        |       |       |       |       |
| 429512 | 36.2  | 50.3  | 56.2  | 69.1  |
| 291324 | 17.8  | 23.3  | 25.8  | 23.3  |
| 372229 | 15.1  | 19.8  | 22.9  | 24.5  |
| 345974 | 51.2  | 50.6  | 52    | 51.2  |
| 283378 | 36.7  | 47.2  | 62.7  | 53.4  |
| 249673 | 13.6  | 15.6  | 21.9  | 19.5  |
| 441282 | 7.3   | 10.4  | 12.9  | 10.7  |
| 471750 | 2.4   | 2.1   | 2.8   | 1.8   |
| 309505 | 18.1  | 17.4  | 17.5  | 19    |
| 250819 | 73.5  | 70.4  | 96.7  | 84    |
| 311883 | 47.7  | 35.9  | 49    | 42.8  |
| 323824 | 1.6   |       |       |       |
| 378734 | 6.7   | 5.7   | 6.7   | 3     |
| 441158 | 5.5   | 4.9   | 7.3   | 8     |
| 339113 | 106.6 | 99    | 116.3 | 101.4 |
| 283425 | 198.6 | 167.2 | 104.9 | 90    |
| 451459 | 15.8  | 16.1  | 21.9  | 17.3  |
| 451459 | 15.8  | 16.1  | 21.9  | 17.3  |
| 451578 | 58.8  | 25.9  | 29.1  | 22.5  |
| 451578 | 58.8  | 25.9  | 29.1  | 22.5  |
| 451559 | 130.5 | 129.6 | 89.7  | 69.1  |
| 451559 | 130.5 | 129.6 | 89.7  | 69.1  |
| 452953 | 19.5  | 17.3  | 17.1  | 17.7  |
| 451202 | 7.4   | 5.7   | 7.5   | 8.3   |
| 456244 | 67.5  | 49.6  | 60.2  | 64.9  |
| 456450 | 16.5  | 15.2  | 15.5  | 17.8  |
| 352738 | 5.3   | 1.8   | 5.6   | 6     |
| 456825 | 22.3  | 17.5  | 14.4  | 18.8  |
| 453780 | 25.1  | 15    | 12.7  | 21.9  |
| 453522 | 41    | 31.6  | 25.9  | 42.4  |
| 453626 | 40.3  | 29.9  | 20.9  | 38.8  |
| 453624 | 97.2  | 69.1  | 51.7  | 87.3  |
| 455768 | 42.1  | 34.2  | 27.7  | 30.7  |
| 455885 | 25    | 19.6  | 14.7  | 22.6  |
| 455892 | 24.4  | 18.9  | 19.4  | 21.4  |
| 455570 | 19.9  | 19.8  | 13.6  | 18    |
| 456129 | 20.6  | 14.3  | 15.1  | 17.7  |
| 456009 | 29.7  | 22.8  | 19.7  | 27.4  |
| 455039 | 5.6   | 7.3   | 2.9   | 6     |
|        |       |       |       |       |
| 455173 | 12.1  | 13.9  | 9.8   | 21.5  |
| 455176 |       |       | 2.5   |       |
| 454921 | 15.7  | 10.1  | 9     | 9.1   |
| 454926 | 2.4   |       | 1.5   | 1.8   |
| 455384 | 5.4   | 6     | 4.9   | 7.1   |
| 455284 | 11.3  | 10.1  | 8.6   | 12.4  |

|        |       |       |       |       |
|--------|-------|-------|-------|-------|
| 435150 | 2.2   | 2.2   | 2.4   | 2.9   |
| 434921 | 3.3   | 1.9   | 5.7   | 1.7   |
| 434825 | 9.1   | 3.1   | 10.8  | 8     |
| 434808 | 7.5   | 7.2   | 7.2   | 8.2   |
| 433459 | 9.4   | 9.2   | 8.3   | 11.3  |
| 326873 | 2.6   | 5.7   | 5     | 3.4   |
| 466948 | 6.3   | 8.5   | 6.1   | 6.5   |
| 327036 | 12.3  | 7.9   | 8.7   | 11.3  |
| 327044 | 30.9  | 24.9  | 23.2  | 29.8  |
| 464548 | 2.4   | 2.3   | 1.5   | 1.5   |
| 474932 | 77.1  | 56.9  | 42.7  | 75.4  |
| 474908 | 134.4 | 117   | 134.8 | 126.1 |
| 474831 | 39.6  | 52.2  | 52.9  | 64.8  |
| 474827 | 69.4  | 69.4  | 90.6  | 79    |
| 332254 | 6.2   | 1.5   | 5.2   |       |
| 468984 | 2.4   | 2.9   | 7     | 5.7   |
|        |       |       |       |       |
| 469785 | 3.2   | 6     | 5.7   | 9.8   |
| 469486 | 20.2  | 14.5  | 5.9   | 12.8  |
| 345073 | 12.9  | 14.9  | 7.4   | 15.1  |
| 345073 | 12.9  | 14.9  | 7.4   | 15.1  |
| 345320 | 18.9  | 14.8  | 14.2  | 22.3  |
| 345337 | 62.2  | 53.7  | 58.7  | 70.4  |
| 345482 | 34    | 23.5  | 20.3  | 20.3  |
| 345469 | 22.7  | 16.9  | 14    | 18    |
| 351871 | 99    | 112.3 | 108.7 | 119.4 |
| 351986 | 5.5   | 2     | 2.1   | 2.4   |
| 464424 | 3     |       | 1.7   | 2.1   |
| 332252 | 1.8   | 2.1   | 3.1   |       |
| 474939 | 6.2   | 6     | 5.9   | 8.9   |
| 452843 | 21    | 17.1  | 19.9  | 19.7  |
| 469125 |       |       | 1.9   |       |
| 469034 | 2     | 3.1   | 3.2   | 5.8   |
| 451819 | 49.7  | 32.5  | 27.7  | 36.7  |
| 453776 | 78.4  | 66.3  | 56.6  | 70    |
| 435024 | 16.7  | 11.2  | 8.7   | 13.6  |
| 456574 | 17.1  | 12.4  | 11    | 13.4  |
| 457008 | 23.1  | 19.7  | 17.5  | 23.7  |
| 473812 | 25.6  | 21.2  | 24.1  | 22.2  |
| 326879 | 1.5   |       | 1.8   | 2.8   |
| 455816 | 3.1   | 3     | 2.7   | 5.2   |
| 455935 | 2.6   | 1.4   | 2.6   | 2.1   |
| 458657 | 5.5   | 6.5   | 1.6   | 2     |
| 467019 |       |       |       | 1.4   |
|        |       |       |       |       |
| 455852 | 23.7  | 15.2  | 17.9  | 22.1  |
| 435025 | 17    | 13    | 12.3  | 17.7  |
| 393753 | 10.4  | 7.6   | 7.6   | 6.6   |
| 378044 | 6.2   | 3.4   | 3.3   | 5.2   |
| 377931 | 5.5   | 3.2   | 2.8   | 3.3   |
| 370526 | 13.2  | 10.8  | 9.7   | 12.5  |
|        |       |       |       |       |



|        |       |       |       |       |
|--------|-------|-------|-------|-------|
| 402123 | 24.2  | 17.8  | 20.8  | 22.4  |
| 402114 | 45.2  | 40    | 35.5  | 39.2  |
| 401981 | 7.9   | 6.9   | 7.9   | 4.3   |
| 402231 | 7.6   | 5.6   | 6     | 7.8   |
| 419181 | 18.8  | 19.6  | 16.7  | 17.7  |
| 422058 | 27.3  | 25.4  | 28.6  | 25    |
| 422065 | 18    | 15.9  | 21    | 15.3  |
| 414789 | 5.4   | 3.1   | 3.2   | 5.4   |
| 414911 |       | 2.1   | 2.2   |       |
| 328315 | 6     | 3     | 3.3   | 6     |
| 327353 | 6.6   | 5.4   | 5.7   | 6.4   |
| 330189 | 15.9  | 16.6  | 16.5  | 18    |
| 330186 | 11.4  | 9.8   | 9.1   | 8.1   |
| 330040 | 3     | 2.8   | 6.1   | 4.7   |
| 305217 | 295.1 | 302   | 307.9 | 278   |
| 305268 | 193.4 | 194.1 | 184.7 | 182.2 |
| 305270 | 9.4   | 10.3  | 11    | 9.8   |
| 305319 | 135.1 | 135.4 | 129.6 | 122.4 |
| 300810 | 14.6  | 10.9  | 10    | 14.5  |
| 300660 | 51.5  | 44.5  | 50.6  | 49.1  |
| 300664 | 23    | 21.1  | 25.3  | 20.4  |
| 300733 | 12    | 14.3  | 16.1  | 12.1  |
| 300741 | 10.8  | 11.3  | 11.5  | 10.1  |
| 472794 | 14.1  | 9.9   | 8.6   | 12.8  |
| 300897 | 13    | 11.4  | 16    | 9.9   |
| 301201 | 49.1  | 39    | 43.7  | 46.7  |
| 301249 | 28    | 23    | 25.9  | 22.6  |
| 301276 | 10.6  | 13.6  | 17.6  | 15.6  |
| 300898 | 12.1  | 9.6   | 10.2  | 9.5   |
| 309684 | 2.2   | 3.2   | 2.7   | 5.2   |
| 309777 | 50.2  | 47.6  | 42.5  | 71.6  |
| 309804 | 26.3  | 18.7  | 15.9  | 20    |
| 300570 | 60.8  | 57.4  | 64.6  | 58.4  |
| 300579 | 41.1  | 34.1  | 40.7  | 35.2  |
| 300392 | 30.6  | 18.7  | 29.7  | 10.2  |
|        |       |       |       |       |
| 344271 | 8.2   | 10.5  | 9.7   | 10.6  |
| 267916 | 44.5  | 39.4  | 46.6  | 41.1  |
| 474977 | 209.5 | 304.6 | 322.5 | 446.1 |
| 474987 | 6.5   | 12.1  | 10.2  | 12.7  |
| 393032 | 42.1  | 40.2  | 41.1  | 38.7  |
| 452347 | 7.6   | 7.8   | 6     | 7.7   |
| 305435 | 55.7  | 57.2  | 54.7  | 58.6  |
| 300461 | 2.7   | 2.6   | 2.6   | 2.5   |
| 444286 | 2.1   | 1.9   | 1.8   | 5     |
| 472640 | 1.6   | 2.7   | 5.4   | 3     |
| 419060 | 2.1   | 2.7   | 3.4   | 5.6   |
| 474943 | 23.6  | 26.7  | 34.2  | 34.1  |
| 301060 | 2.6   | 2.2   | 1.8   | 2.2   |
| 267848 | 51.3  | 65.5  | 71.4  | 82.1  |
| 423807 | 5.7   | 2.3   | 3.1   | 5.3   |
| 428226 | 2.4   | 5.2   | 2.4   | 3     |

|        |       |       |       |       |
|--------|-------|-------|-------|-------|
| 351459 | 79.6  | 75.1  | 78.1  | 74.3  |
|        |       |       |       |       |
| 327475 | 2.8   | 2.8   |       | 6     |
| 305221 | 24.7  | 20.5  | 26.8  | 25.5  |
| 401976 | 8.4   | 7.6   | 3     | 8.3   |
|        |       |       |       |       |
| 330017 |       |       |       | 2.1   |
| 472350 | 2.9   | 1.8   |       | 2.5   |
|        |       |       |       |       |
| 422069 | 2     | 2.6   | 2.3   |       |
| 429452 | 11.8  | 6.9   | 12.4  | 10    |
| 330085 | 1.9   | 1.7   |       |       |
|        |       |       |       |       |
| 382065 | 63    | 67.7  | 77.3  | 74    |
| 395522 | 18.5  | 18.7  | 16.1  | 18.8  |
| 375850 | 82.4  | 97.1  | 108.5 | 101.8 |
| 378583 | 29.2  | 24.4  | 25.4  | 22.5  |
| 372782 | 13.7  | 19    | 20.6  | 15.9  |
| 425634 | 287.9 | 307.1 | 298.6 | 285.8 |
|        |       |       |       |       |
| 445613 | 12.2  | 15.2  | 15.7  | 10.2  |
| 445787 | 11.8  | 11.1  | 10.5  | 9.5   |
| 323042 | 7     | 6.1   | 9.1   | 5.8   |
| 323167 | 15.6  | 10.6  | 10.4  | 11.1  |
| 285455 | 12.5  | 14.2  | 18    | 12    |
| 297952 | 6.8   | 5.7   |       | 3.4   |
| 315610 | 23.2  | 36.8  | 42.4  | 43    |
| 343053 | 11.6  | 9     | 7.9   | 9.3   |
| 337923 | 158   | 167.1 | 194.5 | 166.4 |
| 336503 | 47.6  | 42.9  | 51.6  | 43.3  |
| 437524 | 2.6   |       | 1.8   | 2.7   |
| 382069 | 8     | 3     | 6.3   | 5.8   |
| 375864 | 11.8  | 11.8  | 11.9  | 14.8  |
| 425648 | 43.5  | 54.9  | 53.1  | 49.7  |
| 370314 | 89.5  | 118.5 | 129.3 | 140.1 |
| 335659 | 229.1 | 193.9 | 238.4 | 202.4 |
| 323987 | 2.3   | 1.5   | 1.4   |       |
| 296773 | 1.4   | 1.7   |       |       |
| 342939 | 20.5  | 19.1  | 17    | 20.3  |
| 379771 | 9.9   | 14.1  | 12    | 11.4  |
| 456821 | 18.1  | 16.2  | 12.4  | 21.8  |
| 429521 | 19.2  | 18.4  | 17.7  | 19.2  |
| 438752 | 7.2   | 6.3   | 5.6   | 3.1   |
| 431219 | 20    | 21.1  | 18.4  | 23.8  |
| 446429 | 39.9  | 48.9  | 44.9  | 48.2  |
| 316813 | 17.8  | 16.6  | 13.3  | 17    |
| 430083 | 26.5  | 27.6  | 25.5  | 32.1  |
| 345797 | 20.1  | 29    | 21.1  | 25.6  |
| 430057 | 27.3  | 31.7  | 32.6  | 41.5  |
| 431174 | 2     | 3.4   | 3.2   | 5.5   |
| 384625 | 1.9   | 1.7   | 2.4   | 2.7   |
| 352966 | 8.9   | 10.8  | 9.8   | 10.2  |

|        |       |       |       |       |
|--------|-------|-------|-------|-------|
| 384956 | 3.3   | 2.9   | 5.3   | 3.3   |
| 345836 | 16.5  | 17.6  | 13.8  | 16.6  |
| 384667 | 3.2   | 3     | 2.9   | 3.1   |
| 450015 | 2.7   | 3.4   | 3     | 3.2   |
| 450006 | 10    | 9.9   | 9.1   | 12.2  |
| 449598 | 8.6   | 9.5   | 8.1   | 6.8   |
| 449599 | 1.9   | 2.4   |       | 2.8   |
| 455134 | 8.4   | 7.7   | 9.8   | 7.4   |
| 454886 | 32.3  | 26    | 29.9  | 29.6  |
| 454997 | 33.2  | 31.7  | 35.7  | 34.6  |
| 455007 | 41    | 36.2  | 50.1  | 40.6  |
| 422360 |       | 1.4   | 2.2   | 1.9   |
| 422287 | 650.4 | 611   | 706.6 | 704.6 |
| 435199 | 10.9  | 11.7  | 13    | 14.1  |
| 408515 | 6.8   | 5.9   | 8.1   | 8.5   |
| 320263 | 22.3  | 17.4  | 25.3  | 21.3  |
| 320136 | 49.6  | 57.3  | 63.7  | 58.6  |
| 320292 | 19.1  | 13.5  | 17.7  | 13.2  |
| 289561 | 14.2  | 14.1  | 12.6  | 12.9  |
| 474753 | 109.5 | 117.6 | 182.1 | 140   |
| 474775 | 38.4  | 31.3  | 39.1  | 36.2  |
| 475384 | 9.6   | 7.7   | 7.7   | 8.4   |
| 475382 | 80.5  | 76.6  | 92.7  | 77.9  |
| 475369 | 19.5  | 14.6  | 17.4  | 13.4  |
| 349961 | 15.1  | 14.9  | 22.4  | 13.9  |
| 349981 | 2.8   | 2.5   | 2.8   | 3     |
|        |       |       |       |       |
| 319388 | 10.1  | 9.1   | 8.1   | 7     |
| 408403 | 2     | 6.1   | 2     | 2.6   |
| 453845 | 8     | 9     | 8.2   | 12    |
| 405287 | 55.4  | 51.3  | 62.7  | 61.2  |
| 322724 | 3     | 2.6   | 3.5   | 3.6   |
|        |       |       |       |       |
| 381325 | 27.1  | 23.6  | 37.7  | 24.4  |
| 322666 | 1.6   | 2.1   |       |       |
| 449656 |       |       | 1.5   |       |
| 435161 | 2.2   | 1.8   | 1.8   | 2.2   |
| 435100 | 6     |       | 3.4   | 2.6   |
|        |       |       |       |       |
| 405429 | 16.4  | 10.4  | 11.7  | 11.9  |
| 453862 | 7.7   | 5.3   | 5.5   | 6.2   |
| 426935 | 22.3  | 18.5  | 21.6  | 21.5  |
| 386745 | 15.6  | 9.7   | 5.8   | 9     |
| 386051 | 54.6  | 41    | 30.6  | 35.5  |
| 453247 | 57.6  | 48.7  | 61.4  | 62.4  |
| 450385 | 21.8  | 17.7  | 23.4  | 21.6  |
| 398759 | 29.4  | 35.3  | 31.4  | 36.5  |
| 396911 | 6.1   | 5.7   | 5.5   | 2.8   |
| 396909 | 94.1  | 61.6  | 53.9  | 72.4  |
| 396823 | 58.8  | 43.3  | 52.1  | 50.7  |
| 449879 | 12.5  | 12.7  | 12    | 12.7  |
| 427683 | 21.1  | 18.9  | 18.3  | 18.6  |

|        |       |       |       |       |
|--------|-------|-------|-------|-------|
| 427682 | 177.1 | 175.8 | 140.5 | 168.1 |
| 422269 | 48.9  | 37.4  | 21.8  | 38.8  |
| 422267 | 20.3  | 14.1  | 12.1  | 12.4  |
| 422136 | 252.9 | 206   | 128.3 | 184.4 |
| 422133 | 110.1 | 80.7  | 58.8  | 82.1  |
| 446397 | 14.8  | 10.2  | 8.1   | 9.7   |
| 446398 | 75.3  | 64.4  | 43.2  | 65.6  |
| 446395 | 138.7 | 123.3 | 94.4  | 122.2 |
| 446452 | 18.6  | 13.6  | 13.9  | 16    |
| 283882 | 73.4  | 78.7  | 50.3  | 91.3  |
| 475209 | 228.7 | 159.9 | 147.4 | 159.8 |
| 386058 | 34.8  | 18.8  | 11.7  | 15.7  |
| 385954 | 15.5  | 16.1  | 12    | 10.5  |
| 449602 | 17.6  | 15    | 20.1  | 21.8  |
| 398751 | 27.7  | 32.5  | 23.3  | 27.4  |
| 386135 | 7.5   | 3.3   | 2.3   | 2.5   |
| 396828 | 5.2   | 2.7   | 2.9   | 2.1   |
| 454917 | 27.3  | 25.5  | 36.2  | 34.6  |
| 453249 | 29.1  | 26.9  | 59.4  | 36.7  |
| 373031 |       |       | 1.5   |       |
| 430679 | 8.9   | 10    | 17.9  | 17.4  |
| 430704 | 27.4  | 26.9  | 34.7  | 33.2  |
| 453129 | 48    | 44.4  | 44.4  | 55.4  |
| 450757 | 32.1  | 30.6  | 25.7  | 35.6  |
| 450822 | 78.5  | 90.9  | 75.1  | 83.8  |
| 450881 | 75.7  | 102.9 | 66.5  | 84.1  |
| 352737 | 20.5  | 18.3  | 15.6  | 17.1  |
| 378863 | 21.9  | 29    | 18.1  | 29.3  |
| 445530 | 7.1   | 5.9   | 7     | 5.7   |
| 352652 | 70.8  | 67.2  | 53.1  | 71.1  |
| 401234 | 30.5  | 27.7  | 28.5  | 33    |
| 401217 | 25.8  | 26.3  | 25.5  | 33.7  |
| 401198 | 21.1  | 24    | 24.2  | 27.9  |
| 420766 | 1.8   | 1.4   | 1.4   | 1.9   |
| 420755 | 27.9  | 32.3  | 30.7  | 39.7  |
| 297281 | 1.9   | 2.5   | 1.4   | 2.1   |
| 297361 | 20.9  | 25.5  | 24.9  | 27.5  |
| 297366 | 5.7   | 6.1   | 3.1   | 7.5   |
| 350930 | 27.5  | 29.4  | 27.6  | 28.4  |
| 350611 | 2.6   | 5.9   | 9.1   | 3.4   |
| 349612 | 105.8 | 114.5 | 72.3  | 100.5 |
| 352614 | 39    | 48.1  | 37.3  | 50.6  |
| 343835 | 21.4  | 13.9  | 14.9  | 16.5  |
| 352632 | 9     | 8     | 7.9   | 9.5   |
| 321083 | 2.8   | 6.1   | 7.4   | 11.4  |
| 450766 | 7.2   | 11.2  | 9.4   | 12.5  |
| 320461 |       |       |       | 1.5   |
| 450662 | 30.8  | 28.4  | 30.8  | 35.9  |
| 378821 | 8.2   | 5.4   | 5.8   | 6.9   |
| 419246 |       |       | 1.4   |       |
| 450828 | 15.8  | 18.5  | 13    | 20.2  |
| 293402 | 4.9   | 3.3   | 1.8   | 2.7   |

|        |       |       |       |       |
|--------|-------|-------|-------|-------|
| 319841 |       | 2.9   | 1.6   | 2.3   |
| 293107 | 5.5   | 4.9   | 3     | 2.7   |
| 338189 | 68.6  | 86    | 84.6  | 100.3 |
|        |       |       |       |       |
| 436328 | 5.8   | 5.7   | 3.3   | 3.2   |
| 419564 | 8.1   | 6     | 6.4   | 10.3  |
| 350524 | 2.2   | 5.3   | 6.2   | 2.3   |
| 451984 | 11.7  | 19.9  | 17.1  | 21.5  |
| 384740 | 18.6  | 18.3  | 16.6  | 16.1  |
| 384661 | 22.1  | 28.7  | 28.2  | 27.8  |
| 452460 | 16.7  | 13.6  | 16    | 13.7  |
| 455656 | 35.2  | 37.7  | 40.3  | 44.1  |
| 455766 | 146   | 155.2 | 125.1 | 136   |
| 325172 | 1.5   | 1.8   |       |       |
| 474492 | 29.1  | 24    | 24    | 33.7  |
| 465003 | 9.6   | 10    | 9.7   | 26.3  |
| 473678 | 37.9  | 43    | 33.8  | 44.2  |
| 475365 | 26.2  | 27.8  | 22.5  | 21.6  |
| 347449 | 39.3  | 41.5  | 42.4  | 52.4  |
| 461702 | 56.6  | 75.2  | 88.2  | 86.7  |
| 341598 | 18.8  | 18.8  | 17.8  | 17.4  |
| 324077 | 35.6  | 27.9  | 32.7  | 41    |
| 455682 | 7.1   | 7.9   | 7.5   | 7.7   |
| 347462 | 3.4   | 7.1   | 6     | 6.8   |
| 399485 | 315.3 | 505   | 318.1 | 495   |
| 298787 | 9.5   | 10    | 5.9   | 3     |
| 341594 | 13.7  | 11.8  | 12.8  | 11.8  |
| 455791 | 9.2   | 10.2  | 9.5   | 9.7   |
| 398311 | 17.8  | 17.4  | 19.2  | 19.5  |
| 398357 | 60.3  | 47.9  | 43.5  | 47    |
| 398390 | 31.2  | 26.4  | 25.7  | 31.1  |
| 453798 | 7.1   | 9.6   | 11.5  | 10.5  |
| 372203 | 140.2 | 95.2  | 99.9  | 85.2  |
| 431190 | 6.6   | 6.9   | 5.4   | 2.7   |
| 446352 | 20.7  | 16.8  | 15.6  | 20.6  |
| 328595 | 13.5  | 12.3  | 14.7  | 12.7  |
| 328564 | 11.7  | 10.1  | 11    | 12.9  |
| 461151 | 78.5  | 52.9  | 41.8  | 49.3  |
| 380097 | 42.2  | 31.7  | 37.6  | 40.3  |
| 379989 | 36.6  | 31.4  | 37.8  | 35.4  |
| 463899 | 1.7   | 2.7   | 6     | 3     |
| 332274 | 1.8   | 2.6   | 5.5   | 2.8   |
| 313232 | 22.6  | 20.5  | 22.9  | 18.9  |
| 324800 | 18.8  | 17    | 23.2  | 20.4  |
| 377175 | 48.7  | 36.2  | 43.3  | 46.5  |
| 383163 | 13.6  | 11.4  | 2.4   | 11.6  |
| 356980 | 39.2  | 30.5  | 21.6  | 24.4  |
| 446549 | 11    | 7.6   | 12.2  | 8.6   |
| 446500 | 107.8 | 128.3 | 90    | 111   |
| 446501 | 152.9 | 175.1 | 124.8 | 160.3 |
| 321174 | 25.1  | 40.7  | 37.5  | 36.6  |
| 323340 | 38.7  | 34.4  | 17.3  | 25.5  |

|        |       |       |       |       |
|--------|-------|-------|-------|-------|
| 323330 | 39    | 41.4  | 16.6  | 28.7  |
| 474938 | 109.7 | 130.2 | 105.2 | 128.4 |
| 465420 | 38.3  | 38    | 25.4  | 32.5  |
| 314829 | 19    | 16.6  | 12.9  | 16.4  |
| 314817 | 26.1  | 28.2  | 18.2  | 24.7  |
| 350283 | 25.6  | 32.6  | 29.2  | 24    |
| 474953 | 375.8 | 406.9 | 333   | 393.5 |
| 350155 | 5.3   | 7.7   | 8.2   | 9     |
| 342705 | 34.6  | 41.7  | 39.7  | 45.1  |
| 269787 | 64.4  | 61.6  | 34.9  | 59.2  |
| 269677 | 72.5  | 77.5  | 48    | 69    |
|        |       |       |       |       |
|        |       |       |       |       |
|        |       |       |       |       |
| 269701 | 35.3  | 38.6  | 20    | 31.5  |
| 322362 | 99.1  | 83.4  | 56.9  | 76.7  |
| 348548 | 32.7  | 28.8  | 22.2  | 22    |
| 321175 | 19.6  | 28.1  | 23.1  | 21.4  |
| 450274 | 9.3   | 9.5   | 12.1  | 14.5  |
| 342740 | 14.5  | 15.2  | 19.7  | 22    |
| 314024 | 54    | 55.1  | 39.7  | 46.7  |
| 330595 | 2.3   | 3     | 1.8   |       |
| 374521 | 168   | 228.4 | 172.4 | 199.3 |
| 290596 | 10.9  | 12    | 10.2  | 9.3   |
| 374574 | 154   | 129   | 96.9  | 119.8 |
| 383085 | 6.7   | 8.8   | 5.7   | 9     |
| 322196 | 71.3  | 116.2 | 104.1 | 108.3 |
| 268455 | 9.6   | 8     | 8.4   | 10.6  |
| 351879 | 25.1  | 24.4  | 21.7  | 19.6  |
| 314017 | 17.3  | 19.9  | 17.9  | 19.6  |
| 342660 | 10.4  | 12.1  | 9.3   | 9     |
| 349850 | 16.7  | 16.6  | 12    | 17.4  |
| 374542 | 435.1 | 421.3 | 150.1 | 162.7 |
| 446507 | 1.8   | 2.1   |       | 2     |
| 330824 | 7.7   | 6.6   | 2.3   | 2.7   |
| 348406 | 5.6   | 3.3   | 3     | 2.3   |
| 321346 | 7.4   | 6.9   | 7.3   | 5.3   |
| 269613 | 6.6   | 6.3   | 2.6   | 8.1   |
| 383535 | 90.8  | 63.8  | 84.8  | 60.1  |
| 383531 | 103.1 | 68.7  | 96.5  | 71    |
| 387476 | 6.8   | 3     | 6.1   | 3     |
| 387396 | 12.4  | 8.3   | 10.3  | 9.1   |
| 387394 | 9.2   | 6     | 9.6   | 7.7   |
| 387333 | 19.8  | 13.8  | 19.7  | 16.4  |
| 387331 | 16.2  | 8.2   | 13.5  | 8.6   |
| 387265 | 11.8  | 10    | 13.5  | 9.6   |
| 387191 | 2.1   | 1.7   | 1.8   | 1.5   |
| 391464 | 2.4   |       |       |       |
| 391418 | 2.8   | 2.2   | 6.2   | 1.9   |
| 456838 | 113.7 | 72    | 85.3  | 79.9  |
| 375535 | 26.6  | 29.7  | 26.8  | 26.1  |
| 376057 | 32.2  | 21.8  | 23.9  | 20.7  |

|        |       |       |       |       |
|--------|-------|-------|-------|-------|
| 377867 | 159.1 | 106.3 | 118.6 | 94.5  |
| 377748 | 80.1  | 48.4  | 62.1  | 49.1  |
| 377737 | 111.8 | 80    | 95.7  | 70.2  |
| 377616 | 35.2  | 31.2  | 44.4  | 37.5  |
| 370690 | 40.1  | 39.5  | 33.4  | 38    |
| 430666 | 29.5  | 20.4  | 26.2  | 19    |
| 434045 | 2     | 1.6   | 1.8   | 1.9   |
| 403589 | 51.2  | 28.8  | 50.1  | 32.3  |
| 403587 | 41.3  | 22.9  | 32.9  | 20.7  |
| 403505 | 6.3   | 5.6   | 6.4   | 2.6   |
| 420668 | 16.6  | 11    | 18    | 14    |
| 472328 | 12    | 9.2   | 11.2  | 11.1  |
| 472428 | 2.3   |       | 1.9   | 1.8   |
| 309259 | 85.8  | 51.4  | 58.7  | 61.6  |
| 265708 | 71.4  | 53.1  | 69.1  | 53.6  |
| 265603 | 62.4  | 41.8  | 51.2  | 42.9  |
| 265820 | 126.4 | 77.3  | 103.5 | 86.7  |
| 265954 | 151.6 | 109.7 | 144.3 | 114.1 |
| 265980 | 24.6  | 21.5  | 26.7  | 23.8  |
| 475228 | 165   | 146.1 | 205   | 152.3 |
| 265495 | 27.4  | 18.6  | 42    | 53    |
| 266048 | 104.1 | 70.2  | 93.2  | 74.5  |
| 475240 | 152.9 | 119.6 | 182.6 | 145.3 |
| 342277 | 76.2  | 54.3  | 77.2  | 54.5  |
| 342381 | 22.2  | 15.4  | 17.8  | 13.5  |
| 318125 | 30.2  | 26.6  | 41.3  | 31.5  |
| 387260 | 7     | 2.4   | 7.8   | 2.4   |
| 444865 |       | 1.8   | 2     |       |
| 472442 | 7.2   | 5.4   | 7.3   | 5.7   |
| 377624 | 12.3  | 10.2  | 12.8  | 10.1  |
| 461042 | 121.4 | 88.4  | 97.1  | 86.5  |
| 266086 | 6.7   | 6.6   | 7.1   | 5.8   |
| 342265 | 5.9   | 3.2   | 7.9   | 8     |
| 428930 | 14    | 13    | 14.9  | 12.9  |
| 449670 | 11.1  | 10.3  | 10.8  | 12.7  |
| 456847 | 32.8  | 21.1  | 20.2  | 22.2  |
| 377745 | 15.5  | 10.5  | 12.2  | 12.1  |
| 377875 | 29.8  | 22.6  | 30.2  | 26.5  |
| 456693 | 16.8  | 17.2  | 22.5  | 22.6  |
| 265862 | 9.2   | 5.2   | 7.7   | 5.7   |
| 456706 | 31.7  | 29.7  | 25.9  | 22.5  |
| 423861 | 16.4  | 15.8  | 14.3  | 16.4  |
| 453712 | 18.2  | 19    | 19    | 16.7  |
|        |       |       |       |       |
| 460878 | 33    | 20.7  | 33.5  | 22.2  |
| 264720 | 12.1  | 10.4  | 15.8  | 11.1  |
| 430644 | 6.7   | 6.1   | 7.1   | 6.2   |
| 402358 | 15.6  | 14.7  | 14.2  | 14.6  |
| 341347 | 11    | 13.4  | 9     | 8.1   |
| 320850 | 30.7  | 17.5  | 24.4  | 21.3  |
| 420612 | 1.8   |       |       | 1.8   |
| 472314 | 2.3   | 1.6   |       |       |

|        |       |       |       |       |
|--------|-------|-------|-------|-------|
| 381214 | 50.5  | 11.4  | 29    | 12.5  |
| 450374 |       | 1.4   | 3.1   | 2.2   |
| 455742 | 21.3  | 18    | 19.2  | 16.6  |
| 455627 | 28.1  | 30.8  | 30.8  | 31.6  |
| 432174 | 17.5  | 2     | 18.8  | 5.7   |
| 433410 | 68.4  | 58.4  | 53.7  | 58.4  |
| 411794 | 13.1  | 3.2   | 12.4  | 1.9   |
| 303273 | 6.6   |       | 9.6   |       |
| 303274 | 7.8   |       | 18.9  |       |
| 258714 | 15.4  | 5.6   | 27.9  | 2.5   |
| 459252 | 39.5  | 31.2  | 27.5  | 25.8  |
| 258713 | 14.4  | 9.6   | 20.8  | 9.5   |
| 459242 | 35.9  | 31.3  | 31.8  | 27.6  |
| 346075 | 95.8  | 45    | 120.8 | 42.8  |
| 475286 | 40.6  | 40.2  | 43    | 60.3  |
| 475287 | 23.4  | 22.8  | 18.9  | 23.6  |
| 278659 | 6.6   |       | 15.7  |       |
| 472562 | 2.9   | 2.4   | 3     | 1.7   |
| 376071 | 40.9  | 44.7  | 38.8  | 37.7  |
| 285333 | 42.1  | 32.7  | 38.7  | 25.5  |
| 433412 | 129.6 | 109.2 | 79.8  | 96.5  |
| 375955 | 99.1  | 121.3 | 98.6  | 112.1 |
| 432950 | 20.2  | 6.4   | 20.5  | 10.4  |
| 459124 | 22.5  | 23.6  | 30.8  | 24.5  |
| 398133 | 136.9 | 59.3  | 117.5 | 68.7  |
| 398421 | 27.3  | 27.8  | 29.6  | 30.8  |
| 344997 | 41.5  | 17    | 49.6  | 24.2  |
| 280203 | 46.7  | 36.8  | 58.3  | 47.4  |
| 375852 | 33    | 21.2  | 28.2  | 21.8  |
| 433305 | 7.9   | 24.9  | 14.4  | 25.4  |
| 436971 | 8.7   |       | 5.9   |       |
| 308719 | 14.6  | 7.7   | 14.2  | 6     |
| 375157 | 33.8  | 20.3  | 27    | 16.5  |
| 433304 | 12.7  | 26.2  | 18.4  | 35.8  |
| 429427 | 51.8  | 11.6  | 39.7  | 16.3  |
| 406175 | 8.5   | 6.6   | 5.8   | 5     |
| 406148 | 19.6  | 13.8  | 12.5  | 12.2  |
| 406057 | 69.2  | 69.9  | 58.1  | 56.6  |
| 421983 | 1.9   | 1.7   |       |       |
| 323539 | 9.3   | 8.6   | 12.3  | 10    |
| 323979 | 82.8  | 46.9  | 55.4  | 52.9  |
| 323989 | 12.7  | 6.8   | 6.6   | 6.3   |
| 324196 | 19.4  | 17.9  | 15.9  | 14.4  |
| 474856 | 5.1   | 1.5   | 5.9   | 5.5   |
| 474845 | 242.8 | 216   | 275   | 244.4 |
| 469079 | 19.1  | 12.8  | 16.5  | 12.4  |
| 469733 | 8.1   | 8.5   | 15.7  | 11.2  |
| 475077 | 43.4  | 39.4  | 47.5  | 40.1  |
| 469243 | 24.9  | 11.4  | 15    | 13.5  |
| 337939 | 147.9 | 117.3 | 134   | 118.4 |
| 337987 | 130.7 | 102.5 | 130.3 | 116.8 |
| 459105 | 89.6  | 55.7  | 66.7  | 62.6  |



|        |       |       |       |       |
|--------|-------|-------|-------|-------|
| 449503 | 6     | 2.2   | 7.2   | 5.5   |
| 393358 | 118.2 | 97.2  | 97.2  | 92.9  |
| 458986 | 127.6 | 128   | 158.6 | 144.2 |
| 372488 | 240.1 | 170   | 183.8 | 169.2 |
| 465467 | 2.1   | 2.4   | 2     | 1.5   |
| 372495 | 11.9  | 7.4   | 8.4   | 9.4   |
| 362797 | 2.3   |       | 1.6   |       |
| 370229 | 168.2 | 115.4 | 181.4 | 129.6 |
| 428675 | 40.3  | 19.4  | 27.7  | 18.5  |
| 443996 | 1.6   |       | 1.6   |       |
| 443899 | 13.1  | 7.3   | 8.5   | 6.1   |
| 416448 | 3     |       | 2.5   |       |
| 446618 | 12.2  | 6.6   | 11.3  | 9.3   |
| 446609 | 22    | 11.4  | 21.3  | 14.9  |
| 282888 | 53.4  | 55.6  | 78.5  | 56.2  |
| 473648 | 39.2  | 27.9  | 49.3  | 40.4  |
| 315191 | 81.8  | 39.2  | 42.7  | 32.6  |
| 370234 | 64.8  | 47.7  | 93.3  | 58.4  |
| 290330 | 11.4  | 9     | 15    | 7.2   |
| 337056 | 140.2 | 92.6  | 199.8 | 93.5  |
| 428589 | 42.4  | 30.8  | 35.8  | 31.5  |
| 433149 | 9.6   | 6.7   | 13.9  | 6.9   |
| 381424 | 17.4  | 10.2  | 21.2  | 11.4  |
|        |       |       |       |       |
| 433144 | 16.2  | 14.9  | 25    | 12.1  |
| 308614 | 65.9  | 42.6  | 62.1  | 41.3  |
| 416306 | 2     |       |       |       |
| 336753 | 22.5  | 13.1  | 24.7  | 16.8  |
| 381679 | 12.1  | 10.1  | 13.5  | 10.4  |
| 451142 | 11.9  | 10.2  | 9.7   | 13.8  |
| 355001 | 5.2   | 5.5   | 7     | 5.8   |
| 446461 | 30.2  | 22.9  | 30.4  | 29.7  |
| 334007 | 117.9 | 83.5  | 89.7  | 99.4  |
| 463747 | 75.8  | 58.5  | 69.8  | 51.2  |
| 285084 | 50.2  | 44.3  | 47    | 37.5  |
| 284966 | 57.1  | 43.9  | 47.5  | 43.4  |
| 315954 | 62.3  | 60.5  | 72.6  | 63.7  |
| 349152 | 32.2  | 29.2  | 39.5  | 29.1  |
| 321161 | 25.8  | 25.4  | 41    | 25.7  |
| 381759 | 2.9   | 1.9   | 2.3   |       |
| 355142 | 8.3   | 2     | 2.9   | 3.1   |
| 471709 | 9.3   | 6.9   | 8.3   | 5.5   |
| 333675 | 21.4  | 14    | 10.8  | 13.9  |
| 407015 | 15.7  | 11.7  | 14.4  | 13.3  |
| 304396 | 11.6  | 9.9   | 5.8   | 7.4   |
| 385846 | 17.2  | 8.8   | 14.6  | 12.1  |
| 349166 | 35.3  | 20.7  | 26.7  | 23.2  |
| 463764 | 9.8   | 8     | 6.3   | 7     |
| 427415 | 10.8  | 9.3   | 8     | 8.9   |
| 381330 | 7.6   | 12.2  | 6.3   | 10.2  |
| 358613 | 6     | 8.8   | 6.8   | 13.3  |
| 455493 | 10.6  | 10    | 7.7   | 10.1  |

|        |       |       |       |       |
|--------|-------|-------|-------|-------|
| 446490 | 10.9  | 29.7  | 8.5   | 26.5  |
| 446488 | 55.6  | 198.9 | 61.5  | 213.6 |
| 325725 | 2.3   | 6.1   | 1.8   | 5.9   |
| 335952 | 23.7  | 90.6  | 19.6  | 99.1  |
| 285104 | 11.4  | 50.7  | 13.6  | 56.4  |
| 350327 | 1.4   | 7.8   | 6.9   | 7.8   |
| 344807 | 100.1 | 84.4  | 48.8  | 125.8 |
| 338619 | 38.5  | 92.7  | 46.8  | 101.3 |
| 373023 | 39.6  | 43.7  | 41.6  | 59    |
| 393995 | 10.5  | 31.9  | 11    | 32    |
| 370828 | 13.2  | 56.2  | 17    | 55.9  |
| 286523 | 80.7  | 97.7  | 111.7 | 91.2  |
| 413164 |       | 1.6   |       | 2.7   |
| 361732 |       | 2     |       |       |
| 263969 | 28.4  | 22.3  | 36.9  | 20.5  |
| 407403 | 5.2   | 2.1   | 5.9   | 2.7   |
| 310399 | 13.3  | 27.1  | 13.1  | 33.9  |
| 285025 | 30.5  | 38.6  | 34.3  | 36.8  |
| 452934 | 21.9  | 21.3  | 25.7  | 26.3  |
| 453206 | 95.3  | 83    | 78.8  | 79.6  |
| 453229 | 18.1  | 14.9  | 19.8  | 17.3  |
| 453077 | 51.6  | 38.7  | 42.1  | 45.6  |
| 396455 | 40.8  | 33.6  | 39.8  | 37.3  |
| 396377 | 67.4  | 56.5  | 60.1  | 56.1  |
| 396375 | 51    | 47.6  | 55.8  | 47.3  |
| 396292 | 103.7 | 94.5  | 106.2 | 100.1 |
|        |       |       |       |       |
| 396531 | 19.5  | 12.6  | 11.3  | 12.9  |
| 449301 | 17.2  | 15.7  | 14.7  | 16    |
| 449306 | 53.6  | 44.2  | 46    | 38.3  |
| 449299 | 31.6  | 27.5  | 29.5  | 27.8  |
|        |       |       |       |       |
| 396944 | 33.1  | 25.3  | 29.6  | 35.7  |
| 396860 | 25.7  | 15    | 16.6  | 18.8  |
| 396706 | 17.8  | 13.7  | 13.3  | 15.5  |
| 396628 | 28.7  | 24.7  | 25.5  | 27.4  |
| 453317 | 104.1 | 93.2  | 99    | 93    |
| 453331 | 16.6  | 10.2  | 15.7  | 14.8  |
| 453392 | 70    | 56.8  | 60.4  | 60.6  |
| 373557 | 31.8  | 28.2  | 33.9  | 23.4  |
| 373555 | 5.6   | 1.7   | 7.9   | 5.5   |
| 429225 | 17.5  | 12.7  | 15.5  | 12.1  |
| 429012 | 64.6  | 55.1  | 65    | 61.8  |
| 428937 | 108.9 | 93.9  | 106.2 | 92.9  |
| 428853 | 15.5  | 11.7  | 14.5  | 13.5  |
| 428955 | 64.4  | 53.3  | 58.6  | 50.7  |
| 430221 | 41.4  | 36.7  | 34.7  | 44    |
| 430186 | 19.1  | 15.8  | 16.8  | 14.7  |
| 429594 | 72.8  | 58.2  | 73.3  | 62.5  |
| 429583 | 36.3  | 30.5  | 32.8  | 33.1  |
| 429509 | 68    | 53.6  | 67.7  | 52.5  |
| 429424 | 25.1  | 18.1  | 19.4  | 19.9  |

|        |       |       |       |       |
|--------|-------|-------|-------|-------|
| 429342 | 17.5  | 18.5  | 16.9  | 18.3  |
| 429500 | 55    | 42.9  | 50.5  | 48.5  |
| 429682 | 38.8  | 30.8  | 33.9  | 32.2  |
| 430019 | 47.3  | 34.3  | 41.1  | 30.9  |
| 429921 | 49    | 38    | 39.7  | 37.3  |
| 429907 | 53.5  | 41.8  | 54.3  | 41.8  |
| 429793 | 71.6  | 59.3  | 66.1  | 61.3  |
| 429784 | 40.4  | 34.5  | 35.8  | 32.9  |
| 429693 | 78.7  | 69.1  | 73.8  | 72.9  |
| 430093 | 21.9  | 20.5  | 23.1  | 18.2  |
| 422498 | 24.4  | 23.5  | 29.5  | 18.5  |
| 422492 | 11.4  | 11.5  | 19.1  | 13.8  |
| 425191 | 12.1  | 11.4  | 10.6  | 12.8  |
| 399834 | 15.4  | 14.2  | 10.9  | 13.9  |
| 403045 | 32.7  | 25.4  | 26.3  | 28.1  |
| 403043 | 71.7  | 53.2  | 54.9  | 52.4  |
| 402912 | 28    | 24.7  | 25.9  | 27.7  |
| 403343 | 22    | 24.1  | 26.6  | 29.5  |
| 403665 | 11.7  | 10.2  | 16.5  | 11.9  |
| 403576 | 26.9  | 25.3  | 31.4  | 31.7  |
| 403493 | 157.8 | 116.1 | 123.1 | 120.9 |
| 402109 | 38    | 31.4  | 35.8  | 28.6  |
| 402094 | 31.9  | 27.3  | 31.8  | 24.5  |
| 401968 | 38    | 30    | 35.3  | 32.1  |
| 401825 | 39.3  | 37.6  | 39.9  | 36.9  |
| 401812 | 47.6  | 41    | 41.1  | 38.1  |
| 401688 | 34    | 35.3  | 37.1  | 33.5  |
| 401954 | 32.7  | 29.9  | 29.7  | 30.2  |
| 402207 | 29.4  | 23.5  | 28.2  | 25.4  |
| 402452 | 8.4   | 8.1   | 8.5   | 7.1   |
| 402318 | 28.2  | 19.1  | 20.4  | 21    |
| 422132 | 142.6 | 125.2 | 128   | 148.5 |
| 422106 | 1.6   | 4.7   | 1.8   |       |
| 474316 | 16.8  | 17.1  | 18.1  | 20.8  |
|        |       |       |       |       |
| 464896 | 12.2  | 11.6  | 9.7   | 11    |
| 464912 | 17.8  | 15.5  | 16.5  | 15    |
| 465040 | 3     | 2     | 2.6   | 3.3   |
| 465053 | 2.4   | 2.6   | 1.6   | 3     |
| 473954 | 111.4 | 105.4 | 108   | 113.1 |
| 474005 | 43.2  | 38.9  | 52.5  | 39    |
| 473823 | 21.8  | 23.3  | 29.8  | 27.3  |
| 475268 | 183.7 | 190.6 | 223.8 | 222.4 |
| 345401 | 29    | 28.8  | 35.6  | 31.1  |
| 475277 | 225.7 | 247   | 278.9 | 295.8 |
| 475281 | 11.3  | 10.4  | 11.5  | 12.2  |
| 461640 | 11.5  | 10.3  | 16    | 13.8  |
| 461625 | 24.2  | 27.5  | 39.9  | 35.1  |
| 462519 | 17.6  | 17.5  | 18.6  | 18.7  |
| 475094 | 37.4  | 34.9  | 40.1  | 49.6  |
| 461510 | 2.3   | 1.5   | 1.5   | 1.9   |
| 461503 | 18    | 22    | 26.6  | 25.3  |

|        |       |       |       |       |
|--------|-------|-------|-------|-------|
| 465167 | 9.5   | 6.6   | 7.7   | 5.9   |
| 396277 | 114.7 | 99.7  | 136.8 | 106.2 |
| 396780 | 13.8  | 10.5  | 12.5  | 12.7  |
| 449270 | 3     | 5.6   | 3     | 3.3   |
| 465504 |       | 2.1   |       |       |
| 402198 | 10.5  | 8     | 10.5  | 10    |
| 453465 | 41.8  | 34.4  | 40.2  | 38.8  |
| 430010 | 11.4  | 8.2   | 12.7  | 14.7  |
| 430299 | 18.5  | 12.9  | 15    | 16.1  |
| 430026 | 35.5  | 25.6  | 34.2  | 27.9  |
| 473646 | 12.3  | 8.9   | 9.7   | 11.7  |
| 403501 | 42    | 27.7  | 26.6  | 30.8  |
| 429081 | 21.9  | 18.7  | 22.8  | 23.1  |
| 377307 | 61.5  | 48.5  | 62.5  | 58.4  |
| 429140 | 31.3  | 28    | 28.5  | 25.4  |
| 403359 | 9.5   | 8     | 12.5  | 9     |
| 400514 | 3.2   | 6.2   | 2.8   | 5.6   |
| 456817 | 24.6  | 23.3  | 24.4  | 26.7  |
| 449657 | 29    | 23.8  | 21.8  | 24.9  |
| 403414 | 181.1 | 182.2 | 166.4 | 160.6 |
|        |       |       |       |       |
| 429310 | 13.9  | 13.9  | 12.7  | 12.2  |
| 377143 | 15.4  | 14.4  | 16.7  | 13.4  |
| 453018 | 13.8  | 11.3  | 14.3  | 11.7  |
| 314921 | 7.7   | 8.1   | 6.2   | 9.7   |
| 401590 | 15.3  | 12.8  | 15.5  | 17.9  |
| 399640 | 39.1  | 47.6  | 75.2  | 42.9  |
| 402686 | 12.6  | 10    | 8.9   | 7.7   |
| 397593 | 28.1  | 25.3  | 19.3  | 24.5  |
| 400619 | 12    | 11.6  | 13.9  | 13.1  |
| 459726 | 25.9  | 24.1  | 23.3  | 23.4  |
| 399738 | 26.8  | 20    | 23.8  | 20.9  |
| 400403 | 2.3   | 1.5   |       | 3     |
| 403808 | 20.9  | 17    | 16.5  | 21    |
| 402498 | 11.2  | 10.3  | 12.9  | 13.6  |
| 403487 | 191.4 | 158.5 | 184.1 | 182.8 |
| 449023 | 14.5  | 14.9  | 13    | 14.6  |
| 425199 | 10.9  | 9.7   | 11    | 8.9   |
| 401179 | 7.4   | 5.8   | 6.8   | 8     |
| 400456 | 10.7  | 6.9   | 8     | 9.5   |
| 400349 | 10.3  | 9.4   | 7.8   | 10.7  |
| 429218 | 14.7  | 11.4  | 16.9  | 12.6  |
| 429796 | 11.2  | 7.7   | 10    | 10    |
| 400303 | 7.3   | 7.8   | 10.2  | 9.6   |
| 396453 | 10.5  | 8.1   | 7.4   | 7     |
| 451757 | 94    | 62.1  | 60    | 64.3  |
| 382591 | 16.2  | 16.2  | 10.8  | 21.8  |
| 382603 | 9.9   | 11    | 8.3   | 11.8  |
| 352900 | 11.5  | 14.6  | 14.6  | 16.2  |
| 352757 | 29.3  | 41.4  | 31.7  | 50.1  |
| 352722 | 20    | 20.2  | 21.1  | 31.3  |
| 370253 | 66.6  | 60.7  | 59.9  | 68.4  |

|        |        |        |        |        |
|--------|--------|--------|--------|--------|
| 428035 | 34.2   | 34.3   | 30.9   | 43.2   |
| 437499 | 8.6    | 9      | 7.5    | 7.1    |
| 437495 | 12.1   | 11.8   | 6.5    | 7.5    |
| 437362 | 9.7    | 7.7    | 5.8    | 5.6    |
| 448502 | 6.6    | 8.9    | 9.2    | 7.1    |
| 400132 | 45.2   | 44.7   | 66.7   | 45.2   |
| 400018 | 96.7   | 100.2  | 126.8  | 88.9   |
| 399954 | 31.6   | 34.9   | 50.9   | 34.3   |
| 399908 | 99     | 106.6  | 147.4  | 101.5  |
| 399793 | 58.8   | 51.7   | 71.1   | 51.8   |
| 411437 | 39.2   | 40.7   | 36     | 37.5   |
| 411429 | 54.3   | 52.6   | 50.9   | 55     |
| 411418 | 53.7   | 44     | 49.3   | 44.2   |
| 411400 | 22.4   | 19.8   | 27.8   | 22.2   |
| 411573 | 4.4    | 3.1    | 2.5    | 2.5    |
| 411573 | 4.4    | 3.1    | 2.5    | 2.5    |
| 411734 | 19.6   | 18.2   | 16.7   | 17.4   |
| 411610 | 34.1   | 35.5   | 29.2   | 34.1   |
| 411604 | 48.4   | 49.1   | 45.6   | 52.9   |
| 326414 | 11.2   | 10.7   | 12.3   | 13.5   |
| 326370 | 14.6   | 13.1   | 16     | 18.4   |
| 326481 | 8.9    | 8.8    | 11.6   | 13.4   |
| 326551 | 10.7   | 13.8   | 16.4   | 12.1   |
| 326521 | 5.1    | 1.9    | 2.5    | 2.6    |
| 327009 | 3.4    | 2      | 3      | 2.2    |
| 327069 | 27.6   | 29     | 39.3   | 33.1   |
| 335388 | 76.4   | 71.6   | 41.1   | 47.2   |
| 328159 | 6.8    | 7.9    | 6.2    | 7      |
| 328267 | 7.8    | 6.9    | 8.9    | 6.3    |
| 327330 | 23.8   | 28.4   | 26.6   | 21.3   |
| 327233 | 43.3   | 37.4   | 48.5   | 40.9   |
| 327170 | 35.2   | 40.6   | 48.2   | 40     |
| 327679 | 1.8    | 3      | 3.2    | 3.5    |
| 327604 | 1.8    | 3.2    | 2.8    | 3      |
| 327526 | 8.9    | 9.2    | 11.9   | 11.5   |
| 327486 | 25.7   | 25.9   | 27.3   | 24     |
| 327411 | 40.2   | 46.2   | 52.6   | 47.1   |
| 327574 | 11.2   | 10.5   | 11.6   | 6.9    |
| 329180 | 9.6    | 10.9   | 10.7   | 9.4    |
| 329082 | 23.7   | 21.7   | 20.3   | 26.3   |
| 472835 | 7.3    | 4.9    | 6.6    | 7.1    |
| 352633 | 19.2   | 29.2   | 20.6   | 33.6   |
| 473309 | 9.4    | 8.8    | 5.7    | 12.2   |
| 473315 | 16.9   | 15.6   | 14     | 20.3   |
| 472835 | 7.3    | 4.9    | 6.6    | 7.1    |
| 473175 | 36.8   | 56.8   | 31.9   | 66.8   |
| 473185 | 21.6   | 28.3   | 19.5   | 33.2   |
| 265432 | 66.4   | 92.4   | 91.6   | 103.3  |
| 475147 | 26.6   | 30     | 29.6   | 26.9   |
| 475145 | 107.8  | 106.3  | 109.4  | 104.3  |
| 475161 | 36.2   | 39.4   | 36.5   | 45.2   |
| 475157 | 1454.4 | 1470.4 | 1504.4 | 1622.8 |

|        |       |       |       |       |
|--------|-------|-------|-------|-------|
| 264276 | 6.1   | 5.1   | 2.6   | 2.5   |
| 349883 | 8.2   | 8.3   | 6.9   | 9.4   |
| 351663 | 1.8   | 2.9   | 8     | 6.9   |
| 475089 | 65    | 64.2  | 76.9  | 75.8  |
| 352511 | 10.1  | 12.6  | 8.2   | 16.2  |
| 352601 | 2.8   | 6.3   | 8.5   | 10.3  |
| 351449 | 5.6   | 3.3   | 2.5   | 3     |
| 351453 | 11.3  | 9.7   | 5.9   | 8.8   |
| 335354 | 49.4  | 56.7  | 56.7  | 61.5  |
| 437373 | 8.3   | 10.1  | 9.7   | 11    |
| 328213 | 3.5   | 3     | 9.5   | 6.5   |
| 437358 | 6.1   | 8     | 6.8   | 2.5   |
| 327796 | 1.9   | 1.9   | 3     | 2     |
| 304531 | 109.4 | 98.2  | 136.9 | 102   |
| 394496 | 15.7  | 11.2  | 11.8  | 13.6  |
| 336882 | 43.1  | 40.3  | 33    | 45.3  |
| 264886 | 42.6  | 47.6  | 57.1  | 38.2  |
| 264947 | 32.7  | 31    | 45.1  | 28.9  |
| 430481 | 9.4   | 8.8   | 10.3  | 25.7  |
| 411480 | 1.7   |       |       | 2     |
| 436998 | 2.4   | 1.8   |       |       |
| 411273 | 3     | 2.3   | 1.9   | 6.5   |
| 265422 | 31.8  | 41.5  | 44.1  | 47.4  |
| 286889 | 68.2  | 70.8  | 62.7  | 76.4  |
| 285611 | 170   | 289.6 | 333.8 | 347.4 |
| 310762 | 68.5  | 55.2  | 51.8  | 63.4  |
| 437356 |       | 1.3   | 2     | 1.9   |
| 437356 |       | 1.3   | 2     | 1.9   |
| 430320 | 65.5  | 61.8  | 69.7  | 63.8  |
| 285733 | 79.6  | 68.6  | 65.8  | 74.2  |
| 324233 | 2     | 2.2   | 2.1   | 2.4   |
| 306138 | 106.6 | 101   | 140.7 | 101.6 |
| 285615 | 147.1 | 239.6 | 233.1 | 263.5 |
| 285844 | 33.9  | 33.8  | 30.6  | 36.3  |
| 310783 | 19.6  | 16.4  | 17.2  | 20.2  |
| 264694 | 39.5  | 30    | 29.4  | 32    |
| 411246 | 1.3   | 2.5   |       |       |
| 411246 | 1.3   | 2.5   |       |       |
| 399357 | 36    | 34.9  | 40.8  | 34.1  |
| 284254 | 21.6  | 17.4  | 20.9  | 13.2  |
| 472685 | 3.1   | 5.9   | 5.6   | 2.6   |
| 472685 | 3.1   | 5.9   | 5.6   | 2.6   |
| 448264 | 2     | 2.3   | 7     | 5.5   |
| 462696 | 1.8   | 1.8   | 2.4   |       |
| 462696 | 1.8   | 1.8   | 2.4   |       |
| 409739 | 2.4   | 2.5   | 2.7   | 1.5   |
| 286854 | 26.5  | 19    | 92.8  | 21.6  |
| 411701 |       | 1.7   | 1.9   |       |
| 411701 |       | 1.7   | 1.9   |       |
|        |       |       |       |       |
| 411739 | 1.6   |       |       |       |
| 380442 | 12.7  | 8.9   | 10.7  | 10.9  |

|        |       |       |       |       |
|--------|-------|-------|-------|-------|
| 380873 | 5.5   | 6.3   | 6.6   | 8     |
| 380780 | 17.4  | 18.1  | 20.6  | 19.6  |
| 380708 | 10.8  | 7.3   | 8.3   | 8.5   |
| 380688 | 26.8  | 19.4  | 19.6  | 19.6  |
| 380618 | 17.9  | 16.4  | 16.7  | 16.5  |
| 380584 | 22.9  | 19.7  | 18.6  | 21.1  |
| 380691 | 18.8  | 9.6   | 11.8  | 10.1  |
| 452976 | 34    | 22.5  | 32.7  | 31.8  |
| 382177 | 2.8   | 2.2   | 1.8   | 2     |
| 393423 | 106.6 | 86.6  | 89.9  | 91.5  |
| 355026 | 24.9  | 18.3  | 14.3  | 20.9  |
| 355169 | 19.4  | 13.4  | 13    | 14    |
| 375808 | 22.4  | 20.6  | 21.7  | 19.7  |
| 454124 | 9.6   | 8.7   | 3.4   | 7.1   |
| 370045 | 351.2 | 264.9 | 207.5 | 306.8 |
| 455472 | 29.1  | 20.5  | 23.5  | 26.6  |
|        |       |       |       |       |
| 329869 | 23.6  | 17.9  | 19.5  | 20.7  |
| 329581 | 11.5  | 9.3   | 9     | 7.4   |
| 329568 | 50.4  | 41    | 43.3  | 42.2  |
| 329480 | 27.1  | 25.3  | 30.1  | 25.4  |
| 329456 | 82.9  | 64.2  | 74    | 67.1  |
| 329360 | 2.3   | 2.8   | 6.1   | 2.9   |
| 468790 | 7.1   | 5.7   | 7.4   | 7     |
| 300783 |       |       |       | 1.4   |
| 300875 | 1.6   |       |       |       |
| 314673 | 31.3  | 32.3  | 50.5  | 40.3  |
| 294297 | 48.3  | 37.7  | 42.4  | 40.4  |
| 315325 | 16.3  | 14.5  | 17    | 19    |
| 315198 | 14.2  | 14.2  | 11.3  | 11.4  |
| 314820 | 67.4  | 39.5  | 38.8  | 42.9  |
| 314973 | 10.7  | 5.6   | 7.5   | 9.2   |
| 315098 | 9     | 8.3   | 11.2  | 9.4   |
| 336307 | 94    | 77.3  | 71.6  | 96.6  |
| 475169 | 40.4  | 29.3  | 38.6  | 39    |
| 350631 |       |       | 2     | 1.6   |
| 475301 | 39.6  | 39.8  | 49.6  | 51.3  |
| 475292 | 155.5 | 184.5 | 224.2 | 222.1 |
| 339497 | 102.4 | 90.3  | 111.8 | 112.8 |
| 303940 |       |       | 1.8   |       |
| 449197 | 7     | 5.2   | 6.1   | 5.4   |
| 294174 | 23.9  | 27.3  | 29.2  | 27.7  |
|        |       |       |       |       |
| 448317 | 6.3   | 2.9   | 6.7   | 3.4   |
| 468785 | 19.3  | 13.5  | 18.8  | 13.5  |
| 314704 | 66.5  | 63.4  | 69.4  | 67.4  |
| 320573 | 60.3  | 42    | 54.1  | 41.8  |
| 448966 | 10.9  | 8     | 10.8  | 11.3  |
| 423690 | 42.4  | 34.3  | 34.7  | 41.1  |
| 380588 | 23.5  | 13.1  | 15.3  | 12.1  |
| 455266 | 10    | 8.5   | 6.9   | 9     |
| 443601 | 2.5   | 2     | 1.7   | 2.4   |

|        |       |       |       |       |
|--------|-------|-------|-------|-------|
| 311541 | 100.5 | 99.2  | 69.1  | 144.3 |
|        |       |       |       |       |
| 344429 | 57.5  | 46.6  | 51.3  | 42.9  |
| 290009 | 17.1  | 26.5  | 28.1  | 34.3  |
| 329783 |       | 1.3   | 1.3   |       |
| 329660 | 16.8  | 13    | 11.9  | 11.3  |
| 289630 | 8.2   | 3     | 9     | 6.1   |
| 390418 | 2.1   | 1.3   |       | 1.7   |
| 329767 | 9.5   | 9     | 10.3  | 6.4   |
| 343870 | 70.8  | 32.1  | 24.8  | 22.3  |
| 339390 | 8     | 7.1   | 10.2  | 11    |
| 318416 | 35.9  | 26.2  | 23.3  | 27.2  |
| 448964 | 10.1  | 8.5   | 11.3  | 7.5   |
| 459963 | 6.9   | 6.1   | 2.9   | 2.3   |
| 455451 | 24.5  | 17.5  | 18.1  | 25.1  |
| 289898 | 112.1 | 71.5  | 105.3 | 65.6  |
| 294155 | 7.8   | 8.1   | 13.6  | 12.9  |
| 450770 | 26.9  | 19.5  | 23    | 29    |
|        |       |       |       |       |
| 443580 | 1.8   | 2     | 1.7   | 1.6   |
| 448080 | 31.1  | 25.7  | 31.4  | 26.8  |
| 454009 | 72.5  | 98.3  | 89.7  | 117.7 |
| 454093 | 14.3  | 24.5  | 18.1  | 26.4  |
| 455476 | 7.9   | 13.6  | 8.3   | 12.3  |
| 455470 | 18.4  | 29.4  | 25    | 31    |
| 455380 | 44.6  | 37.8  | 24.8  | 35.3  |
| 426279 | 2.3   | 3.1   |       | 3     |
| 440943 | 17.6  | 29.7  | 20.3  | 27.5  |
| 440787 | 19.3  | 17.9  | 13.7  | 15.2  |
| 431722 | 38.6  | 51.8  | 39.6  | 47.9  |
| 431669 | 17.4  | 35    | 25.9  | 30.1  |
| 403058 | 20.5  | 21.4  | 16.3  | 18.5  |
| 291020 | 11.2  | 19.3  | 12.7  | 12.4  |
| 291699 | 18.2  | 27.6  | 19.9  | 29.5  |
| 291716 | 7.6   | 12.5  | 6.1   | 10.7  |
| 310640 | 24.6  | 27.3  | 13.2  | 15.7  |
| 314975 | 9     | 13.2  | 8.4   | 12    |
| 475204 | 56.7  | 94.8  | 66.5  | 96.1  |
| 347882 | 6.4   | 12.2  | 8.9   | 15.2  |
| 263844 | 84    | 143.1 | 101.5 | 136.9 |
| 398110 | 67.6  | 152.4 | 107.3 | 142.4 |
| 448245 | 5.3   | 5.5   | 5.8   | 8.2   |
| 285252 | 57.1  | 100.7 | 84.4  | 92.9  |
| 315003 | 8.7   | 10    | 5.9   | 9.3   |
| 263780 | 79    | 148.2 | 86.3  | 116.7 |
| 430200 | 24.6  | 20.7  | 18.7  | 22.9  |
| 475206 | 7.5   | 14.3  | 8.5   | 13.9  |
| 440832 | 5.9   | 13.5  | 8.8   | 13.8  |
| 398731 | 14.6  | 10.3  | 9.8   | 10.2  |
| 348057 | 20.6  | 21.1  | 16    | 28    |
| 441063 |       | 1.4   |       | 2     |
| 402927 | 17.4  | 17.2  | 13.8  | 15.2  |



|        |       |       |       |       |
|--------|-------|-------|-------|-------|
| 398032 | 16.5  | 20.8  | 17.9  | 24.4  |
| 431814 | 3.2   | 5.7   | 2.7   | 2.5   |
| 431555 | 26.4  | 31.3  | 24.7  | 28.2  |
| 428921 | 65.7  | 95.8  | 77    | 87.2  |
| 264342 | 11.1  | 10    | 16.6  | 20.1  |
| 455386 | 5     | 5     | 3     | 3     |
| 440714 |       | 3     | 3.2   | 2.9   |
| 431534 | 2.7   | 6.7   | 8.2   | 7.2   |
| 441000 | 2.8   | 7.2   | 2.7   | 7.1   |
| 285237 | 22.5  | 37.3  | 34.3  | 42.8  |
| 304474 | 82.7  | 114.5 | 103.5 | 125.5 |
| 452916 | 40.4  | 43.9  | 34.8  | 54.9  |
| 398073 | 20.9  | 30.6  | 23.1  | 29.7  |
| 448753 |       |       |       | 1.5   |
| 448753 |       |       |       | 1.5   |
| 398175 | 13.8  | 14.9  | 14    | 16.9  |
| 291596 | 2.2   | 5.6   | 2.6   | 5.6   |
| 453285 | 42.2  | 62    | 40.6  | 56.5  |
| 285372 | 15    | 22.7  | 15.8  | 19.9  |
| 453045 | 164.6 | 288.5 | 192.2 | 280.6 |
| 453169 | 160.7 | 282.6 | 210.4 | 265.5 |
| 380402 | 10.8  | 7.8   | 11.3  | 7.7   |
| 380307 | 38.9  | 41.6  | 30.6  | 39.2  |
| 456662 | 65.5  | 85.6  | 86.1  | 98.5  |
| 353609 | 19.3  | 15.7  | 19.2  | 18.6  |
| 353588 | 12.9  | 11.1  | 16.6  | 14    |
| 436755 | 8.3   | 9.2   | 11    | 7     |
| 436739 | 14.9  | 17.7  | 22.6  | 14.9  |
| 446635 | 3.3   | 6.1   | 9.1   | 6.8   |
| 402344 | 19    | 15.7  | 13.5  | 13    |
| 475216 | 51.8  | 63    | 64    | 66.7  |
| 475302 | 7.8   | 11.1  | 12    | 13    |
| 274305 | 42.2  | 63.7  | 66.5  | 59    |
| 274470 | 27.4  | 30.6  | 28    | 35.1  |
| 274399 | 58.4  | 71.5  | 74.6  | 77.3  |
| 384440 | 53.9  | 50.7  | 57.1  | 50.3  |
| 384478 | 5.9   | 6.1   | 5.9   | 5.7   |
| 432118 | 103   | 136.1 | 140.2 | 153.7 |
| 313049 | 85    | 121.2 | 98.9  | 110.4 |
| 459277 | 5.8   | 6.1   | 3.3   | 4.2   |
| 459356 | 17.2  | 15.8  | 15.3  | 14.8  |
| 274333 | 5.1   | 8     | 8.8   | 9.4   |
| 345750 | 46.8  | 46.3  | 48.8  | 50.2  |
| 345602 | 45.5  | 74.2  | 83.4  | 82.1  |
| 380212 | 3.2   | 3.1   | 6     | 3.2   |
| 471312 | 1.6   |       |       |       |
| 432205 | 23.7  | 26.6  | 26.4  | 29.6  |
| 340466 | 17    | 17.3  | 20.7  | 19.5  |
| 313751 | 43    | 83.3  | 77.3  | 120   |
| 306776 | 80.3  | 76.9  | 70.4  | 83.1  |
| 436655 |       | 1.3   |       |       |
| 384632 | 10.4  | 13.2  | 11.6  | 10.8  |

|        |       |       |       |       |
|--------|-------|-------|-------|-------|
| 456981 | 30.9  | 24.3  | 26.8  | 24.3  |
| 306754 | 86.6  | 95.2  | 112.4 | 116.9 |
| 456671 | 11.9  | 13.5  | 11.9  | 15.8  |
| 386465 | 17.2  | 16.4  | 12.7  | 14.9  |
| 391767 | 102.1 | 94.3  | 81.7  | 92.2  |
| 391773 | 13.6  | 14.4  | 13.5  | 16.7  |
| 393187 | 51.6  | 55.6  | 36.5  | 51.5  |
| 391848 | 67.6  | 54.3  | 55.1  | 62.8  |
| 365994 | 10    | 6.1   | 6.1   | 8.6   |
| 369527 | 119.8 | 132.3 | 139.4 | 131.8 |
| 369438 | 50    | 50    | 49.1  | 48.7  |
|        |       |       |       |       |
| 367786 | 55.4  | 52.2  | 47.3  | 60.1  |
| 367785 | 160.4 | 155.7 | 140.8 | 165.8 |
| 367701 | 31.2  | 29.3  | 29.3  | 28.3  |
| 367696 | 261.3 | 264   | 265.9 | 303.8 |
| 367695 | 108.7 | 108.3 | 115.8 | 121.2 |
| 367682 | 19.6  | 19.8  | 22    | 17.2  |
| 367681 | 7.9   | 6.8   | 9.7   | 8.2   |
| 369509 | 85.3  | 71.9  | 75.4  | 74    |
| 372735 | 15.6  | 13.1  | 10.3  | 13.9  |
| 422241 | 19.7  | 16.1  | 17    | 19.2  |
| 426161 | 88.2  | 100.9 | 81.7  | 116.4 |
| 426218 | 19.9  | 21.6  | 19.8  | 26    |
| 320700 | 82.7  | 86    | 67.8  | 80.6  |
| 320535 | 51.9  | 49.3  | 43.8  | 49.2  |
| 463576 | 19.7  | 14.9  | 13.4  | 18.3  |
| 463618 | 13.7  | 12.5  | 10.9  | 9.8   |
| 463877 | 5.5   | 1.9   |       | 5.4   |
| 463762 | 8.2   | 5.5   | 6.7   | 8.7   |
| 463734 | 23    | 20.5  | 19.2  | 22.8  |
| 314014 | 25.5  | 28.5  | 22.9  | 25.7  |
| 304409 | 33.5  | 36.7  | 25.5  | 33.9  |
| 314162 | 17.2  | 20.5  | 16.4  | 21    |
| 314269 | 12.7  | 15.5  | 10    | 14.2  |
| 469976 | 26.2  | 37.5  | 39.7  | 45.6  |
| 467339 | 3.2   | 3.2   | 3.4   | 1.7   |
| 319316 | 43.5  | 43.3  | 42    | 41.3  |
| 343598 | 81.3  | 74.9  | 73.5  | 92.8  |
| 259240 | 446.9 | 421.6 | 321.9 | 437.6 |
| 279443 | 91.9  | 91.4  | 72.2  | 96.8  |
| 336977 | 108.9 | 88.2  | 72.2  | 86.7  |
| 338632 | 13    | 8.4   | 9     | 9.5   |
| 338316 | 20.8  | 13.8  | 13.1  | 14    |
| 338345 | 79.4  | 82.9  | 56.5  | 79.8  |
| 342269 | 24.4  | 12.8  | 18    | 16.8  |
| 342329 | 87.2  | 45.2  | 77    | 59.6  |
| 342374 | 14.7  | 10.3  | 13.2  | 13.6  |
| 461052 | 25.9  | 18.7  | 25.3  | 20.5  |
| 342193 | 28.4  | 21.4  | 28.3  | 21.9  |
| 426095 | 25.5  | 25.9  | 23.1  | 26.8  |
| 342320 | 6.7   | 2.4   | 6.7   | 3.3   |

|        |       |       |       |       |
|--------|-------|-------|-------|-------|
| 470082 | 6     | 7.6   | 5.7   | 8     |
| 338479 | 50.9  | 25.9  | 30.9  | 31.4  |
| 337766 | 9.8   | 9.8   | 11.5  | 10.6  |
| 314054 | 22.8  | 20.6  | 16.8  | 18.1  |
| 470146 | 5.5   | 9.9   | 8.3   | 10.5  |
| 450089 | 105.9 | 109.4 | 124.2 | 145.4 |
| 378457 | 33.4  | 34.1  | 43.6  | 48.4  |
| 401023 | 27.6  | 25.4  | 28.4  | 31.1  |
| 319346 | 9.4   | 9.1   | 10    | 10    |
| 319204 | 6.7   | 5.3   | 5.1   | 2.2   |
| 386325 | 1.9   | 2     |       |       |
| 450140 | 51.8  | 47.9  | 44.7  | 59.8  |
|        |       |       |       |       |
| 378541 | 220.6 | 190.7 | 172.9 | 199.6 |
| 450094 | 158.6 | 150.7 | 162   | 194.7 |
| 314191 | 13.1  | 11.8  | 12.8  | 11.5  |
| 401225 | 73.5  | 60.4  | 61.7  | 74.2  |
| 378650 | 28.2  | 30.6  | 25.3  | 29.6  |
| 425900 |       | 3.1   | 5.2   | 1.7   |
|        |       |       |       |       |
| 467223 | 1.9   |       |       | 1.3   |
| 426168 | 27.3  | 35.6  | 25.2  | 33.9  |
| 385670 | 1.9   | 1.7   |       |       |
| 309598 | 60.3  | 57.1  | 59.9  | 61.8  |
| 281969 | 187.6 | 108   | 67.8  | 97.9  |
| 401115 | 143.5 | 134.4 | 117   | 144.3 |
| 320684 | 16.3  | 14.4  | 16    | 13.3  |
| 386588 | 6.8   | 6.7   | 8.2   | 9.3   |
| 449904 | 6     |       |       | 2.6   |
| 377546 | 21.3  | 17.2  | 21.9  | 31.1  |
| 386298 | 2.8   | 5.7   | 5.9   | 5.9   |
| 314378 | 3.1   | 2.8   | 2.5   | 2.7   |
| 259239 | 11.2  | 11.8  | 9.9   | 13.4  |
| 452117 | 31    | 21.1  | 23    | 29.3  |
| 309491 | 39.9  | 43.7  | 51.5  | 60.8  |
| 388861 |       |       | 2.7   | 1.7   |
| 430190 | 68.4  | 50.8  | 38.6  | 40.7  |
| 430188 | 13.9  | 7.9   | 8.9   | 10.3  |
| 430096 | 13.9  | 19.1  | 21.6  | 19.3  |
| 439672 | 20.6  | 22.8  | 15.9  | 17.9  |
| 439663 | 42.1  | 35.3  | 30.7  | 33.6  |
| 439568 | 1.9   | 2.8   | 5.9   | 3.4   |
| 438295 | 37.8  | 26.1  | 33    | 23.4  |
| 409723 | 5.5   | 2.7   | 6.2   | 1.7   |
| 412367 | 6.8   | 7.3   | 5.2   | 9.6   |
| 412363 | 10.6  | 10.1  | 7.4   | 10.2  |
| 413024 | 20    | 19.3  | 24.2  | 16.8  |
| 413007 | 11.9  | 11.6  | 17.5  | 12.1  |
| 412828 | 5.9   | 7.8   | 7.2   | 2.4   |
| 331200 | 8.4   | 5.8   | 9     | 3.3   |
| 331193 | 52.8  | 44.1  | 46.1  | 49    |
| 331104 | 16.8  | 11.7  | 15.5  | 12.2  |

|        |       |       |       |       |
|--------|-------|-------|-------|-------|
| 317425 | 44.4  | 46.2  | 57.9  | 46.7  |
| 467891 | 2.9   | 6.4   | 5.8   | 5.6   |
| 475475 | 45.9  | 58.1  | 76    | 69.5  |
| 475187 | 43.4  | 54    | 61.9  | 57.4  |
| 475491 | 7.4   | 3.3   | 6.1   | 5.7   |
| 348922 | 32.1  | 25.6  | 21.4  | 23    |
| 351633 | 9.8   | 8.2   | 9.7   | 11.9  |
| 351488 | 10.6  | 11    | 12.9  | 14    |
| 341383 | 41.6  | 37    | 34.8  | 49.2  |
| 475030 | 3     | 6.8   | 6.6   | 7.7   |
|        |       |       |       |       |
| 346220 | 19.1  | 19.6  | 19.3  | 15.9  |
| 387498 | 8.4   | 9.9   | 9.4   | 11.2  |
| 467879 | 6     | 5.9   | 6.6   | 2.9   |
| 377965 | 13.3  | 17.5  | 20    | 19.4  |
| 393837 | 347.6 | 446   | 487.4 | 455.2 |
| 345100 | 22.9  | 17.2  | 13.2  | 20    |
| 331110 | 1.4   |       | 1.6   | 1.6   |
| 393843 | 69.9  | 88.8  | 102.6 | 97.6  |
| 388870 | 3.1   | 3.2   | 6.3   | 2.5   |
| 465823 | 2.3   | 2.6   | 2.6   | 5.8   |
| 326942 | 2.7   | 1.5   |       |       |
| 326942 | 2.7   | 1.5   |       |       |
| 423867 | 61.2  | 65    | 67    | 60.3  |
| 317492 | 18.9  | 16.1  | 13.1  | 16.3  |
| 412235 |       | 1.9   |       |       |
| 377981 | 118.8 | 119.8 | 104.9 | 142   |
| 439576 | 5.3   | 7.1   | 9.3   | 9.3   |
| 430095 | 5.4   | 7     | 8     | 5.2   |
| 451401 | 30    | 40.1  | 33.8  | 42.9  |
| 451441 | 25.1  | 25    | 25.1  | 28.3  |
| 451345 | 13.3  | 11.1  | 13.9  | 14.2  |
| 449268 | 33.6  | 35.9  | 22    | 39.1  |
| 456441 | 49    | 55.6  | 50.3  | 67.2  |
| 454426 | 23.7  | 27.5  | 26.7  | 25.5  |
| 454540 | 78.5  | 81.2  | 62.5  | 84.8  |
| 444036 | 17.3  | 22.5  | 12.3  | 17.7  |
| 430479 | 8.1   | 6.7   | 8.2   | 7.4   |
| 429432 | 4.9   | 1.8   | 5.3   | 2.1   |
| 424315 | 26.7  | 24.8  | 24.3  | 25.7  |
| 426556 | 52.3  | 51.1  | 50.9  | 54.7  |
| 427170 | 148.7 | 189   | 151.2 | 187.7 |
| 427097 | 27.5  | 30.9  | 30.5  | 31.5  |
| 444728 | 3.3   | 5.6   | 5.6   | 6.8   |
| 444733 | 11    | 12.8  | 9.6   | 8.9   |
| 440144 | 21.3  | 25.9  | 19    | 28.2  |
| 440152 | 7.5   | 6.9   | 7.5   | 9.1   |
| 420484 | 1.5   | 2.3   | 2.6   | 2.7   |
| 410974 | 10.3  | 8.7   | 13.1  | 26.5  |
| 410324 | 1.8   |       |       | 1.6   |
| 474937 | 247.4 | 293.6 | 252.4 | 345.2 |
| 467877 | 6.1   | 8.3   | 6.9   | 7.9   |

|        |       |       |       |       |
|--------|-------|-------|-------|-------|
| 475233 | 140.8 | 191.3 | 164   | 210.9 |
| 475239 | 3.2   | 5.5   | 3     | 3.2   |
| 347173 | 34.6  | 40.7  | 32.7  | 44.4  |
| 475116 | 67.6  | 100.5 | 102.5 | 131.9 |
| 426530 | 293.8 | 182.5 | 176.1 | 186.7 |
| 434025 | 1.7   | 2.6   | 2.6   | 1.4   |
| 443946 | 2     | 5.5   | 5.9   | 7.8   |
| 444845 | 1.8   | 2.1   |       | 1.7   |
| 420469 | 1.6   | 1.9   | 4.9   | 2     |
| 456323 | 12.6  | 17.5  | 13.4  | 17.3  |
| 456342 | 8.2   | 7.9   | 9.5   | 10.7  |
| 345687 | 14.4  | 9.6   | 9.1   | 11.5  |
| 451318 | 18.4  | 17    | 17.6  | 22.4  |
| 453637 | 78.4  | 73.5  | 64.5  | 84.8  |
| 378648 | 17.4  | 20.8  | 14.6  | 20.3  |
| 430462 | 25.7  | 19.3  | 20.4  | 17.4  |
| 426529 | 5     | 5.2   | 7.2   | 4.8   |
| 444633 | 2     |       |       |       |
| 378656 | 26.7  | 34    | 25.9  | 36.3  |
| 391642 | 12.3  | 12.1  | 13.7  | 13.1  |
| 391637 | 8.5   | 6.4   | 4.9   | 6.5   |
|        |       |       |       |       |
|        |       |       |       |       |
| 391143 | 6.7   | 7.4   | 8.8   | 7.5   |
| 391097 | 1.9   |       |       |       |
| 367454 |       |       | 1.7   | 1.6   |
| 445186 | 7.5   | 9.7   | 7.6   | 10.3  |
| 445352 | 37.6  | 41.3  | 42.6  | 45.3  |
| 436390 | 36.2  | 36.2  | 38.2  | 32.8  |
| 431985 | 8.2   | 5.1   | 6.9   | 5.5   |
| 416453 | 26.7  | 22.5  | 30    | 21.8  |
| 410938 | 101.1 | 99.2  | 126.6 | 110.7 |
| 446527 | 44.1  | 34.5  | 34.3  | 34    |
| 321017 | 7     | 8     | 9.4   | 7.2   |
| 292411 | 24.2  | 32.4  | 28.9  | 38.1  |
| 344606 | 23.6  | 27.5  | 27.9  | 36.6  |
| 342773 | 94.8  | 84.6  | 78.7  | 81.6  |
| 459137 | 39.3  | 37.5  | 38.5  | 36.4  |
| 458598 | 33.4  | 33.1  | 33    | 28.2  |
| 352218 | 164.2 | 177.4 | 171.3 | 209   |
|        |       |       |       |       |
| 351916 | 5.7   | 6.8   | 5.4   | 6.9   |
| 336719 | 207.3 | 205.9 | 211.5 | 187.6 |
| 459258 | 14.9  | 16.2  | 15.2  | 20.8  |
| 436442 | 14.9  | 15.4  | 15    | 19.1  |
| 292355 | 1.4   | 2.9   | 2.5   | 2.5   |
| 472974 | 2.2   | 2.5   | 2.1   |       |
| 249878 | 37.7  | 41.3  | 39.2  | 40.6  |
| 351899 | 2.7   | 6.3   | 5.8   | 3.2   |
| 292490 | 7.9   | 6.3   | 5.6   | 5.9   |
| 459345 | 17.1  | 18.3  | 14.7  | 17    |
| 292697 | 23.1  | 23.7  | 14.2  | 27.1  |

|        |       |      |       |       |
|--------|-------|------|-------|-------|
| 391154 | 2.3   | 2    |       |       |
| 342687 | 11.5  | 13   | 16.7  | 15    |
| 455240 | 30.6  | 30.1 | 28.4  | 31.4  |
| 458456 | 63.6  | 64.2 | 60.7  | 71.2  |
| 346234 | 95.7  | 97.1 | 130.2 | 119   |
| 310201 | 60.4  | 46.3 | 45.3  | 49.7  |
|        |       |      |       |       |
| 292347 | 6.7   | 6.9  | 9     | 5.4   |
| 321127 | 8.2   | 2.7  | 7.7   | 7.1   |
| 436485 | 3.4   | 2.2  | 8     | 6     |
| 459445 | 11.4  | 11.8 | 14.2  | 16    |
| 449945 | 28.3  | 29.5 | 28.9  | 45.2  |
| 346376 | 52.7  | 42.2 | 43.6  | 43.4  |
| 458474 | 10.9  | 10.2 | 12.7  | 10.4  |
| 385027 | 2.3   | 1.8  | 1.8   | 2.8   |
| 382608 | 8.9   | 8.8  | 11.6  | 9.8   |
| 382715 | 38.9  | 33.6 | 27.3  | 32.2  |
| 353150 | 10.4  | 8.6  | 10.7  | 8.3   |
|        |       |      |       |       |
|        |       |      |       |       |
| 443572 | 2.5   | 1.8  | 5.3   | 2.4   |
| 410910 | 19.1  | 16.7 | 21    | 18.8  |
| 414898 | 20.6  | 13.2 | 20.3  | 15.4  |
| 288163 | 40.3  | 32.7 | 35.4  | 29.7  |
| 288052 | 34.7  | 29.8 | 37.6  | 28.8  |
| 334549 | 24.2  | 29.1 | 49.4  | 26.2  |
| 464150 | 45.2  | 32.5 | 30.8  | 29.9  |
| 335447 | 144.6 | 89   | 88.3  | 133.9 |
| 292903 | 15.1  | 11.7 | 16.8  | 14.4  |
| 296222 | 11.7  | 13.4 | 15    | 9.9   |
| 296286 | 8.6   | 8    | 6.2   | 7.2   |
| 296421 | 2.6   | 2.9  | 6.2   | 5.2   |
| 296303 | 23.6  | 20.2 | 23.8  | 22.7  |
| 272566 | 4.9   | 2.7  | 4.7   | 5.4   |
| 272483 | 56.1  | 48.1 | 49.6  | 50.4  |
| 272472 | 8.4   | 14.7 | 6.6   | 5.6   |
| 272457 | 7.8   | 6.2  | 8.8   | 7.7   |
| 475011 | 74.2  | 71.2 | 85.9  | 74.5  |
| 272381 | 78.3  | 62.3 | 67.1  | 59.5  |
| 271836 | 2     | 3.3  | 8.5   |       |
| 272366 | 15.3  | 29.6 | 6     | 7.2   |
| 272344 | 2.9   | 3.1  | 6.6   | 6.2   |
| 272273 | 13.5  | 12   | 8.3   | 9.4   |
| 272248 | 22.7  | 22.7 | 25.7  | 22.4  |
| 337449 | 71.2  | 52   | 67    | 56.1  |
| 468622 | 6.2   | 3.4  | 5.4   | 2.9   |
| 461814 | 7.3   | 6.5  | 6.2   | 7.8   |
| 394847 | 24.4  | 22.3 | 17    | 19.6  |
| 463981 | 14.7  | 14.6 | 17.7  | 17.8  |
| 312776 | 68.8  | 73.1 | 79.5  | 76    |
| 464154 | 109.5 | 77   | 68.3  | 64.4  |
| 381277 | 109   | 93   | 101.4 | 91.1  |

|        |       |       |       |       |
|--------|-------|-------|-------|-------|
| 272073 | 1.7   |       | 1.6   | 1.9   |
| 468457 | 1.7   | 1.4   | 3.1   | 1.9   |
| 369696 | 118.1 | 83.4  | 85    | 81.2  |
| 271742 | 1.3   |       |       | 1.7   |
| 453123 | 86.9  | 66.9  | 68    | 61.5  |
| 441830 | 2.8   | 3     | 6.6   | 2.6   |
| 414772 | 1.7   | 1.7   | 1.9   | 1.5   |
| 381195 | 38.4  | 31.4  | 39.5  | 35.4  |
| 398372 | 59.4  | 63.9  | 57.4  | 57.3  |
|        |       |       |       |       |
| 363226 | 2     | 2.2   | 1.6   | 2.2   |
| 366403 | 5.9   | 7.1   | 5.7   | 1.5   |
| 454757 | 26.6  | 30.1  | 28.5  | 31.7  |
| 454831 | 12    | 15.2  | 13.4  | 11.7  |
| 454902 | 74.3  | 76.7  | 58.3  | 64.7  |
| 432900 | 23.8  | 25.5  | 25.4  | 25.4  |
| 432917 | 70    | 90.5  | 86.4  | 84.4  |
| 415758 | 46.4  | 43    | 35.2  | 40.4  |
| 467100 | 13.2  | 17.7  | 20    | 20    |
| 466488 | 5.9   | 6.9   | 8.5   | 6.9   |
| 468649 | 5.6   | 3.4   | 3.5   | 7.5   |
| 467784 | 33.4  | 35.1  | 41.4  | 46.7  |
| 474968 | 386.6 | 438   | 414   | 428.1 |
| 461415 | 2.2   | 5.3   | 2.7   | 5.7   |
| 461413 | 3.4   | 5.9   | 2.1   | 2.6   |
| 456515 | 21.4  | 28.1  | 21.3  | 29.4  |
| 431089 | 12.1  | 9.6   | 11.3  | 11.2  |
| 461299 | 9     | 7     | 7.7   | 7.3   |
| 390885 | 3     | 2.8   | 1.8   | 2.3   |
| 463478 | 22.8  | 21.7  | 25.2  | 28.1  |
| 363351 | 1.8   | 1.9   | 1.7   | 2     |
| 456634 | 24.5  | 23.6  | 17.2  | 25.9  |
| 406246 | 23.9  | 31.7  | 26.5  | 31.5  |
| 433997 | 2.7   | 5.6   | 6     | 3     |
| 428875 | 25.9  | 32    | 33.7  | 25.8  |
| 425227 | 145.5 | 163.9 | 142.7 | 177.5 |
|        |       |       |       |       |
| 432970 | 27.4  | 28.6  | 20.5  | 28.9  |
| 434368 | 1.6   | 2.5   | 6.4   | 2.4   |
| 394512 | 20.1  | 12.7  | 12.8  | 15.4  |
| 428886 | 58.1  | 71.5  | 68.8  | 64.4  |
| 432897 | 12.9  | 16.2  | 19.5  | 17.3  |
| 401079 | 9.5   | 6.4   | 8.6   | 8.3   |
| 448506 | 3.2   | 2.3   | 6.9   | 2     |
| 375956 | 41.6  | 47.9  | 39.7  | 54.3  |
| 376129 | 32.1  | 31.1  | 30.6  | 32    |
| 376060 | 9.7   | 15.3  | 9.8   | 14.3  |
| 376058 | 92.4  | 109.1 | 80.3  | 106.4 |
| 375011 | 63.9  | 74.7  | 53.4  | 72.1  |
| 375002 | 28.3  | 39.1  | 25.2  | 42.6  |
| 456139 | 13.2  | 14.4  | 11.5  | 15.3  |
| 434337 | 14.9  | 21.3  | 14.7  | 20.2  |

|        |       |       |       |       |
|--------|-------|-------|-------|-------|
| 434445 | 5.5   | 3.1   | 3     | 5.9   |
| 416058 | 2.8   | 6     | 2.3   | 2.9   |
| 325817 | 29.6  | 29.6  | 27.6  | 37.9  |
| 325816 | 14.5  | 19.2  | 15.6  | 20.5  |
| 339725 | 107.7 | 88.4  | 106.7 | 99.4  |
| 448492 | 17.4  | 22.4  | 16    | 19.6  |
| 375988 | 17.5  | 20.4  | 16.3  | 20.8  |
| 347241 | 11.6  | 20.4  | 20.8  | 23.8  |
| 346886 | 7.4   | 6.1   | 5.3   | 6.2   |
| 325668 |       | 2.8   | 2.5   | 3.3   |
| 335878 | 284.1 | 317.7 | 310   | 322.6 |
| 374918 | 12.7  | 12.2  | 9.6   | 11.9  |
| 407691 | 47.4  | 57.2  | 46.9  | 64.1  |
| 374637 | 26    | 23    | 22    | 20.2  |
| 374637 | 26    | 23    | 22    | 20.2  |
| 459073 | 95.8  | 124.4 | 90.1  | 121.7 |
| 289490 | 11.7  | 9.5   | 9.4   | 11.6  |
| 342899 | 154.5 | 183.9 | 164.2 | 215.7 |
| 311501 | 34.7  | 32.5  | 37.1  | 43.3  |
|        |       |       |       |       |
|        |       |       |       |       |
| 289580 | 14.3  | 15.4  | 10.3  | 11.6  |
| 347381 | 8.7   | 10.7  | 8.7   | 10.6  |
| 336440 | 8.7   | 10.2  | 10.8  | 13.4  |
| 325965 |       |       | 2.1   |       |
| 420879 | 1.5   | 1.5   | 2     | 1.8   |
|        |       |       |       |       |
| 376389 | 13.6  | 16    | 11.7  | 13.6  |
| 335932 | 23.7  | 22.9  | 23.4  | 24.2  |
| 386165 | 38.2  | 32.7  | 28.7  | 29.5  |
| 386084 | 5.9   | 5.9   | 5.7   | 2.5   |
| 379482 | 24.4  | 21.6  | 24.2  | 19.7  |
| 379812 | 41.8  | 32.8  | 29.1  | 27.3  |
| 379766 | 5     | 2.2   | 4.5   | 2.6   |
| 395057 | 20.9  | 17.4  | 20.4  | 17.5  |
| 394911 | 21.7  | 20.8  | 28.6  | 14.9  |
| 394833 | 30.1  | 23.9  | 32.3  | 18.5  |
| 394768 | 49.3  | 53.4  | 57.5  | 49.1  |
| 410038 | 3     | 5.4   | 2.4   | 2.6   |
| 410020 | 7.3   | 2.1   | 3.2   | 2.7   |
| 409915 | 10.6  | 8.6   | 9.9   | 8.9   |
| 317193 | 15.2  | 14.8  | 16.3  | 12.7  |
| 317302 | 12.5  | 12.3  | 12.3  | 11.1  |
| 475107 | 39.8  | 42.5  | 51.4  | 55.1  |
| 394985 | 31.3  | 31.8  | 39.6  | 20    |
| 347958 | 14.8  | 15.5  | 13.7  | 19.5  |
| 292319 | 6.7   | 10.2  | 8.3   | 7.7   |
| 437618 | 3.1   | 5.3   | 3.2   | 3.4   |
| 343840 | 38.1  | 32.6  | 35.2  | 27.9  |
| 335303 | 67.4  | 64.4  | 57.7  | 62    |
| 378978 | 18.1  | 17.5  | 16.7  | 16.1  |
| 397577 | 46.3  | 136.2 | 42.9  | 54.4  |



|        |       |       |       |       |
|--------|-------|-------|-------|-------|
| 394664 | 16.9  | 17.1  | 26.5  | 15.6  |
| 394664 | 16.9  | 17.1  | 26.5  | 15.6  |
| 402349 | 32.3  | 34.6  | 36.7  | 39    |
| 395542 | 42    | 33.3  | 27.2  | 37.9  |
| 423902 | 93.3  | 60.5  | 58.7  | 83.2  |
| 424769 | 139.2 | 107.9 | 87.3  | 116.4 |
| 282913 | 55.5  | 58.5  | 67.1  | 72.2  |
| 424810 | 320.7 | 226.2 | 217.5 | 242.2 |
| 448986 | 29.7  | 24.2  | 26.3  | 26.9  |
| 335298 | 227.3 | 202.1 | 184.7 | 231.8 |
| 378419 | 8.2   | 5.4   | 8.2   | 2.8   |
| 386079 | 30.6  | 20.8  | 26.4  | 21.7  |
| 306341 | 112.2 | 94.7  | 102   | 108.9 |
| 397498 | 30.4  | 71.2  | 37.1  | 35.8  |
| 436248 | 5.7   | 2.3   |       | 1.3   |
| 436145 | 3.1   | 1.7   |       | 3.3   |
| 380967 | 134.7 | 152.9 | 130.2 | 163.6 |
| 380981 | 79.3  | 80.9  | 61.6  | 75.4  |
| 394793 | 86.7  | 81.1  | 57.1  | 75.5  |
| 397901 | 128.7 | 117   | 92.1  | 109.4 |
| 397770 | 25.6  | 28    | 25.9  | 36    |
| 397752 | 2.8   | 2.5   | 2.4   | 3     |
| 397746 | 66.5  | 69.7  | 71.1  | 83.9  |
| 397695 | 18.4  | 16.9  | 16    | 21.1  |
| 397673 | 28.5  | 25.2  | 26.8  | 26.4  |
| 397574 | 107.8 | 115.4 | 84.4  | 139   |
| 397573 | 6.9   | 9.2   | 11.3  | 12    |
| 397571 | 39.7  | 42.4  | 39.7  | 46.8  |
| 397495 | 24.2  | 16    | 27.5  | 16    |
| 397491 | 51.1  | 67.6  | 63.6  | 97.9  |
| 457613 | 54.8  | 76.3  | 68.2  | 85.6  |
| 377188 | 18.4  | 18.6  | 10.2  | 15.3  |
| 422226 | 110.5 | 148.8 | 132.1 | 171.9 |
| 426454 | 21.7  | 26    | 20.3  | 24.2  |
| 426452 | 165   | 158.6 | 139.8 | 152.4 |
| 426376 | 93.8  | 84.9  | 75.2  | 94.7  |
| 426309 | 16.4  | 14.9  | 16.8  | 20.3  |
| 321146 | 20.4  | 27.4  | 29.1  | 29.7  |
| 319967 | 64.8  | 71.2  | 58.7  | 62.4  |
| 470318 | 140.1 | 158.3 | 149.8 | 192.2 |
| 471560 | 60.7  | 59.7  | 50.5  | 64.5  |
| 316081 | 17.5  | 15.6  | 15.4  | 17.2  |
| 345065 | 29.4  | 28.4  | 23    | 26    |
| 460125 | 55.2  | 56.7  | 50.5  | 60.9  |
| 342741 | 129.8 | 122.4 | 103.4 | 112.6 |
| 342837 | 127.1 | 108.7 | 91.9  | 104.2 |
| 349641 | 26.1  | 19.7  | 23.7  | 18.4  |
| 458022 | 12.3  | 8.7   | 10.6  | 9.6   |
| 459988 | 14.1  | 12.2  | 13.9  | 13.2  |
| 320279 | 8.6   | 8.8   | 9.6   | 5.8   |
| 470458 | 2.2   | 2.4   | 2.2   | 3.3   |
| 372439 | 303.7 | 171.1 | 187.6 | 122.8 |

|        |       |       |       |       |
|--------|-------|-------|-------|-------|
| 463546 | 253   | 221.2 | 180.8 | 224.6 |
| 471422 | 10.4  | 18.4  | 16.1  | 20.1  |
| 403724 | 7.5   | 10    | 6.9   | 10.1  |
| 426286 | 71.5  | 54.7  | 50.8  | 72.2  |
| 315921 | 40.4  | 37.6  | 46.1  | 45.8  |
| 424461 | 49.9  | 45.2  | 51.5  | 45.6  |
| 321024 | 15.8  | 8.1   | 11.9  | 11.2  |
| 456799 | 52.9  | 36.5  | 29.8  | 42.8  |
| 463370 | 11.7  | 21.7  | 18.8  | 19.7  |
| 342629 | 77.5  | 80.4  | 62.4  | 74.1  |
| 426375 | 201.9 | 151.8 | 142.4 | 197.9 |
| 316575 | 11.5  | 15    | 17.6  | 17.1  |
| 422249 | 16.6  | 15    | 18.9  | 12.7  |
| 435980 | 12.1  | 11.8  | 10.1  | 13.6  |
| 380843 | 5.7   | 6.8   | 5.5   | 6.7   |
| 471553 | 9.7   | 10.7  | 8.9   | 9     |
| 471337 | 10.9  | 11.2  | 10.2  | 9.4   |
| 449738 | 14.5  | 16.6  | 13.1  | 18.8  |
| 434858 | 5.8   | 2.8   | 5.9   | 6.1   |
| 342655 | 6.9   | 5.7   | 2.9   | 3.1   |
| 285918 | 23.6  | 22.8  | 22.2  | 30.8  |
| 345094 | 15.8  | 15.1  | 11.4  | 11.4  |
| 372546 | 28    | 24    | 20.8  | 23.6  |
| 428334 | 229.5 | 342.1 | 352   | 382.9 |
| 459427 | 55.7  | 66.6  | 61.3  | 79    |
| 428364 | 204.5 | 264.9 | 199.6 | 228.4 |
| 315909 | 43.2  | 43.2  | 42.9  | 43.7  |
| 319826 | 12.8  | 17.5  | 12.5  | 16.5  |
| 319979 | 13.1  | 11.7  | 8.2   | 12    |
| 449921 | 23.7  | 18.9  | 19.2  | 22    |
| 394801 | 89.5  | 77    | 61.9  | 84.3  |
| 459546 | 80.3  | 86.7  | 79.8  | 93.3  |
| 426294 | 18.6  | 16.2  | 17.8  | 25.2  |
| 380190 | 33.8  | 28.5  | 27.8  | 25.8  |
| 380161 | 11.7  | 15.7  | 15.5  | 15.7  |
| 452318 | 26.7  | 25.1  | 22.2  | 24.6  |
| 452381 | 97.2  | 93.1  | 88.7  | 114.6 |
| 452401 | 58.9  | 50.2  | 41.4  | 58.7  |
| 451164 | 12.1  | 10.7  | 14.2  | 13.9  |
| 451176 | 41.4  | 24.8  | 27.9  | 30    |
| 388885 | 5.9   | 2.6   | 2.3   | 2.6   |
| 372358 | 26    | 14.8  | 12    | 12.8  |
| 371867 | 142.7 | 144.8 | 183.5 | 137.4 |
| 427618 | 27.7  | 26.1  | 23    | 30.9  |
| 448185 | 1.7   | 2.2   | 6.3   | 1.6   |
| 310481 | 101   | 76.4  | 64.6  | 55.3  |
| 317469 | 15.8  | 5.5   | 8.9   | 6.8   |
| 315500 | 8.7   | 13.7  | 12    | 7.9   |
| 315488 | 25    | 24    | 28.7  | 24.8  |
| 316234 | 27.2  | 23.1  | 28.2  | 26.7  |
| 342636 | 37.8  | 32.8  | 29.6  | 30.7  |
| 342471 | 40.8  | 31    | 42.1  | 28.1  |

|        |       |       |       |       |
|--------|-------|-------|-------|-------|
| 257594 | 47.8  | 39.8  | 51.8  | 43.1  |
| 257606 | 11    | 10.3  | 11.6  | 8.7   |
| 257617 | 52.1  | 49.4  | 53.2  | 44.1  |
| 257624 | 16.9  | 12.8  | 17.3  | 12.3  |
| 257644 | 25.1  | 20.2  | 26.9  | 22.2  |
| 257571 | 2.7   | 2     | 3.1   | 6.9   |
| 269941 | 11.8  | 16.7  | 11.1  | 22.7  |
| 398074 | 177.9 | 149.4 | 110.7 | 126.8 |
| 380271 | 15.8  | 10.7  | 11.7  | 11.7  |
| 388824 | 5.7   | 2.9   | 2.3   |       |
| 251106 | 34    | 26.6  | 32.8  | 28    |
| 257560 | 1.7   | 2.9   | 2.1   | 2.3   |
| 443903 | 5.3   | 2.5   | 6.1   | 5.3   |
| 311145 | 35.7  | 30.2  | 37.8  | 29.8  |
| 310450 | 48.8  | 50.3  | 68.4  | 53    |
| 397207 | 139.7 | 109.6 | 142.3 | 89.8  |
| 287489 | 110.1 | 78.9  | 92.2  | 79.7  |
| 370633 | 232   | 142.5 | 189.6 | 143.6 |
| 372305 | 25.5  | 31.6  | 27.9  | 22    |
| 342469 | 8.4   | 5.4   | 6.8   | 2.9   |
| 371865 | 6     | 2.8   | 5.6   | 2.9   |
| 402506 | 9.8   | 8.3   | 8.7   | 8     |
| 469271 | 81.6  | 71.3  | 65.8  | 76.3  |
| 397994 | 43.6  | 46.6  | 43.3  | 45.1  |
| 451185 | 6.6   | 5.4   | 2.4   | 2.7   |
| 402508 | 23.2  | 18.9  | 16.7  | 22    |
| 370473 | 22.8  | 18.7  | 18    | 21.1  |
| 316255 |       | 1.5   | 1.7   |       |
| 386730 | 3     | 2.2   | 2.6   | 6.5   |
| 386710 | 42.9  | 31.2  | 14.7  | 27.2  |
| 386568 | 7     | 5.1   | 1.8   | 3.1   |
| 386404 | 5.3   | 2.5   |       | 1.5   |
| 383002 | 9.9   | 8.9   | 5.8   | 7.1   |
| 382924 | 38.2  | 29.2  | 23.4  | 23.1  |
| 382833 | 56.2  | 41    | 31.2  | 29.6  |
| 382733 | 8.7   | 5.8   | 5.1   | 2.2   |
| 396332 | 114.6 | 99    | 49.9  | 90.3  |
| 449463 | 6.5   | 6.3   | 5.2   | 6.3   |
| 389398 | 5.3   | 2.2   |       | 1.3   |
| 388102 | 2.7   |       |       | 2.7   |
| 388998 | 5.2   | 2.1   | 1.8   | 2.2   |
| 389311 | 28.7  | 20.5  | 8.3   | 14.4  |
| 389300 | 6.5   | 2.9   | 2.1   | 2.3   |
| 389269 | 5.5   | 2.5   | 1.6   | 1.6   |
| 389255 | 60.1  | 48.9  | 28    | 45    |
| 389233 | 37.3  | 23.9  | 11.7  | 19.4  |
| 389191 | 19.5  | 17.4  | 9.1   | 12.5  |
| 389178 | 19.3  | 18.9  | 9.8   | 11.7  |
| 389131 | 2.4   | 3.2   |       |       |
| 389060 | 22.3  | 15    | 8.7   | 9.6   |
| 391719 | 16.4  | 13.1  | 8.8   | 13.6  |
| 391693 | 183.8 | 132   | 68.4  | 102.1 |

|        |       |      |      |       |
|--------|-------|------|------|-------|
| 391692 | 109.3 | 76.7 | 38.2 | 61.1  |
| 391526 | 3.2   | 1.8  |      |       |
| 390730 | 5.2   |      |      | 2.8   |
| 390886 | 7.9   | 5.6  | 1.5  | 2.9   |
| 391393 | 2     |      |      |       |
| 391309 | 2.2   | 1.7  |      |       |
| 391258 | 2     | 1.8  | 1.7  | 1.8   |
| 391204 | 5.5   | 3    | 2.3  | 5.4   |
| 391156 | 39.9  | 15.4 | 35.5 | 13.9  |
| 391107 | 6.5   | 3    | 1.5  | 2.1   |
| 391058 | 9.7   | 7.3  | 2.4  | 6.6   |
| 362984 | 9.6   | 7.7  | 1.9  | 5.4   |
| 362970 | 10.1  | 2.5  |      | 2.8   |
| 362964 | 16.7  | 17.5 | 8.5  | 14.6  |
| 362963 | 56.5  | 43.5 | 19.6 | 42.2  |
| 362825 | 1.9   |      |      |       |
| 362998 | 15.1  | 15   | 8.7  | 10.5  |
| 362821 | 18.5  | 18.5 | 15.1 | 21.3  |
|        |       |      |      |       |
| 363464 | 15.4  | 13.6 | 6.6  | 12.2  |
| 363354 | 29.6  | 22.4 | 12.9 | 22.6  |
| 363229 | 35.6  | 25.6 | 13.9 | 24.4  |
| 363140 | 6.1   | 3.2  | 2.4  | 5.7   |
| 363117 | 52.3  | 38.3 | 16.3 | 37.1  |
| 363249 | 2.3   |      | 2.4  | 2.4   |
| 360743 | 2.8   |      | 1.8  |       |
| 360548 | 2.8   | 2.9  |      | 2.2   |
| 360314 | 7.2   | 1.8  | 1.6  | 2.8   |
| 360182 | 10.3  | 5.9  | 2.9  | 5.8   |
| 360450 | 10.1  | 7.2  | 3.4  | 8.2   |
| 360841 | 6.6   | 6.1  |      | 4.9   |
| 361929 | 5.2   | 1.5  | 1.5  | 2.3   |
| 361693 | 2.3   | 2.1  |      | 2.9   |
| 360901 | 3.3   | 5.5  | 3    | 2.2   |
| 365704 | 3.3   | 7.2  | 2.9  | 4.8   |
| 365265 | 6.4   | 6.2  |      | 3.3   |
| 365837 | 11.1  | 10.6 | 12.8 | 5.9   |
| 364006 | 2.1   | 2    |      | 1.5   |
| 363925 | 5.6   | 7.6  | 3    | 5.2   |
| 363813 | 6.4   | 3.2  | 2.4  | 5     |
| 363684 | 9     | 7.1  | 3    | 6     |
| 363589 | 16.6  | 13   | 5.2  | 12.1  |
| 363581 | 6.7   | 5    | 2.4  | 6.2   |
| 364107 | 1.8   |      |      | 2     |
| 364689 | 2.4   | 3.3  |      | 2.1   |
| 364586 | 1.7   | 1.7  |      |       |
| 364311 | 2.8   |      | 1.8  | 2.2   |
| 364947 | 3.2   | 2.4  | 1.4  | 2.3   |
| 353004 | 9.8   | 6.8  | 1.8  | 6.5   |
| 352899 | 24.6  | 23   | 21.5 | 24.8  |
| 354033 | 85    | 55.8 | 31.1 | 47.8  |
| 353903 | 168.5 | 126  | 61.5 | 103.4 |

|        |       |       |       |       |
|--------|-------|-------|-------|-------|
| 353817 | 112.9 | 96    | 45.9  | 67.8  |
| 358773 | 62.4  | 41    | 21.5  | 31.9  |
| 358636 | 77.1  | 58    | 31.4  | 50.6  |
| 358491 | 52.5  | 37.7  | 11.7  | 17.2  |
| 358417 | 84.8  | 62.6  | 23.5  | 41.4  |
| 358356 | 12.9  | 14.9  | 8.1   | 14.7  |
| 358885 | 19.1  | 10.6  | 5.9   | 11.3  |
| 359741 | 3.2   | 2.6   |       | 1.8   |
| 359480 | 6.4   | 3.1   | 2.7   | 8.9   |
| 359361 | 9.8   | 7.4   |       | 5.7   |
| 359264 | 7.4   | 3     | 2.1   | 3.2   |
| 359175 | 10.5  | 9     | 2.4   | 6     |
| 359086 | 8.9   | 6.4   | 3.4   | 7.7   |
| 358986 | 11.3  | 9     | 1.8   | 7.3   |
| 357523 | 9.8   | 7.1   | 2.8   | 5.2   |
| 375445 | 152.4 | 111.7 | 52.9  | 98.4  |
| 374038 | 122.2 | 102.7 | 88.8  | 94.9  |
| 374024 | 209.3 | 174.9 | 72.6  | 135.1 |
| 373901 | 182.9 | 140.2 | 142.2 | 126.7 |
| 373894 | 54.2  | 50.3  | 35.6  | 54.1  |
| 373807 | 38    | 25.7  | 15.1  | 23.2  |
| 373804 | 176.2 | 120.4 | 61.9  | 96    |
| 375330 | 96    | 82    | 56.1  | 84    |
| 373703 | 38.7  | 31    | 29.4  | 45.9  |
| 367513 | 15.6  | 12    | 5.5   | 10.7  |
| 367488 | 14.8  | 9.9   | 7     | 9.8   |
| 367354 | 12.6  | 9.9   | 5.4   | 7.4   |
| 367346 | 8.9   | 10.2  | 3.6   | 6.2   |
| 367250 | 8.4   | 5.9   | 2     | 5.1   |
| 367165 | 8.3   | 2.6   | 2.3   | 5.1   |
| 367627 | 57    | 37.3  | 20    | 31.5  |
| 367629 | 76.2  | 47.6  | 28.6  | 50.9  |
| 372774 | 33.9  | 182.7 | 196.7 | 48.5  |
| 406215 | 10.2  | 10.1  | 8     | 8.4   |
| 410935 | 15.4  | 9.6   | 7.6   | 11.3  |
| 410737 | 9.4   | 8     | 3.4   | 9.2   |
| 446356 | 15.1  | 16.2  | 16.1  | 21.6  |
| 326889 | 13.4  | 12.6  | 6     | 8.7   |
| 474596 | 38.7  | 37.2  | 44.8  | 55.2  |
| 467086 | 7.7   | 5.7   | 7.5   | 9.8   |
| 474268 | 16    | 20.3  | 16.3  | 26.4  |
| 328113 | 42.4  | 26.2  | 15.4  | 28.6  |
| 328109 | 46.7  | 33.9  | 16.1  | 25.8  |
| 474678 | 67.2  | 66.8  | 38.5  | 71.7  |
| 329270 | 10.2  | 8.7   | 8.7   | 8.6   |
| 471385 | 25.5  | 17.2  | 11.6  | 17.6  |
| 471534 | 13.6  | 11.7  | 4.6   | 11.8  |
| 471057 | 61.6  | 60.5  | 29.2  | 52.1  |
| 471209 | 2.7   |       | 1.3   |       |
| 471234 | 102.4 | 74.6  | 36.6  | 62.3  |
| 467521 | 31.8  | 26.6  | 18.7  | 28.3  |
| 475427 | 83.8  | 66    | 30.6  | 60.3  |

|        |       |       |       |       |
|--------|-------|-------|-------|-------|
| 475436 | 57.6  | 47    | 23.9  | 45.9  |
| 475612 | 17.7  | 19.1  | 9.2   | 22.2  |
| 475607 | 29.5  | 29.8  | 15.3  | 36.1  |
| 475069 | 67.5  | 46.9  | 35.2  | 41.7  |
| 475074 | 49.8  | 34.2  | 19.6  | 28.9  |
| 362708 | 2     |       | 1.4   |       |
| 425202 | 8.3   | 8.5   | 7.2   | 5.9   |
| 346515 | 81.7  | 65.8  | 46.1  | 68.3  |
| 356545 | 5.8   | 4.7   | 2.3   | 5.1   |
| 377231 | 148.6 | 101.7 | 51.3  | 78.8  |
| 388389 | 2.2   | 1.9   |       | 1.7   |
| 360654 | 2.5   | 2.6   |       |       |
| 364219 | 2     | 1.5   |       |       |
| 475451 | 15.6  | 13.6  | 11.2  | 14.1  |
| 373104 | 27.6  | 24.2  | 23.1  | 31.9  |
| 329274 | 12.1  | 11.8  | 12.7  | 9.7   |
| 353908 | 97.2  | 67.1  | 29.7  | 54.5  |
| 426159 | 22.4  | 16.8  | 12.1  | 15.9  |
| 358540 | 12.3  | 11.2  | 3.1   | 7.3   |
| 389015 | 3     |       |       | 3.3   |
| 362831 | 2.9   | 1.6   |       | 2     |
| 382888 | 7.1   | 3.1   | 2.1   | 2.8   |
| 389247 | 7.7   | 10.3  | 6.5   | 9.8   |
| 365304 | 3.5   | 2.9   | 4.9   | 5.7   |
| 346654 | 168   | 115.6 | 61.2  | 103.1 |
| 375553 | 54.5  | 45.3  | 26.8  | 35    |
| 360979 | 9.9   | 5.4   | 1.8   | 3.2   |
| 367263 |       | 2.1   |       |       |
| 352498 | 1.8   | 1.8   |       |       |
| 383258 | 22.8  | 21.8  | 10    | 18.5  |
| 396335 | 2.1   | 5.9   |       | 6.2   |
| 366095 | 7.5   | 5.8   | 6.4   | 7.1   |
| 353027 | 18.3  | 15    | 9.3   | 10.5  |
| 362118 | 1.4   | 1.7   |       |       |
| 425192 | 40.8  | 36.9  | 28.9  | 34.8  |
| 362428 |       | 1.3   |       | 1.5   |
| 383242 | 16.1  | 12.5  | 5.9   | 12.4  |
| 340376 | 18.5  | 10.3  | 17.3  | 12.4  |
| 363118 | 6     | 3.1   | 1.6   | 3     |
| 448537 | 1.6   |       |       |       |
| 364743 |       | 1.4   |       |       |
| 362695 | 2.3   |       |       | 1.8   |
| 363678 | 2.6   | 1.4   |       |       |
| 386867 | 2     | 1.6   |       |       |
| 361306 | 1.7   | 1.9   |       |       |
| 391343 | 1.5   |       |       |       |
|        |       |       |       |       |
| 383530 |       | 1.9   |       |       |
| 344918 | 109.8 | 123.8 | 100.3 | 138.3 |
| 365054 | 1.6   |       |       |       |
| 373709 | 7.9   | 2.9   | 2.2   | 5.8   |
| 409918 | 6.5   | 7.2   | 3.1   | 6.2   |

|        |       |       |       |       |
|--------|-------|-------|-------|-------|
| 363808 | 1.8   | 1.7   |       |       |
| 340622 | 52.2  | 46.1  | 42.2  | 34.4  |
| 378031 | 6.2   | 2.2   | 2.7   | 5.3   |
| 353763 | 12.3  | 14.5  | 8.2   | 13.4  |
| 329283 | 10.3  | 9.9   | 7.6   | 2.7   |
| 344924 | 143.4 | 136.3 | 98.9  | 139.3 |
| 399497 | 35.7  | 20.8  | 20.1  | 22.5  |
| 326914 | 6.3   | 3.3   | 2.7   | 5.8   |
| 383340 | 10.1  | 8.2   | 2.7   | 5.6   |
| 344690 | 19.5  | 13.7  | 14.3  | 17.6  |
| 373103 | 1.9   | 1.4   | 1.4   | 1.6   |
| 352919 | 2.5   | 1.6   | 2.2   |       |
| 377770 | 3     | 2.6   | 2.5   | 3.2   |
| 382904 | 7     | 2.6   | 3.3   | 2.6   |
| 472600 | 6.4   | 6     | 2.4   | 5.4   |
| 354160 | 9.8   | 6.7   | 5.9   | 8.9   |
|        |       |       |       |       |
| 365392 | 1.8   | 2     |       | 2.2   |
| 377156 | 34    | 37.5  | 22.1  | 29.4  |
| 358534 | 5     | 2.5   |       | 2.8   |
| 389227 | 6.3   | 3.2   | 1.5   | 3.1   |
| 358260 | 21.7  | 17.5  | 18.5  | 20.7  |
| 455352 | 41.9  | 43.1  | 40.1  | 42.1  |
| 439130 | 15.3  | 22    | 13.3  | 21.8  |
| 447760 | 44.9  | 53.7  | 54    | 67    |
| 403791 | 46.3  | 44.8  | 30.8  | 48.4  |
| 403739 | 63.3  | 60.1  | 58.1  | 69.3  |
| 403688 | 5.3   | 11.1  | 6.6   | 11.1  |
| 419098 |       | 1.6   | 1.8   |       |
| 419220 |       | 1.5   |       |       |
| 474601 | 18.4  | 21.9  | 16.5  | 21.8  |
| 474873 | 391.6 | 415.6 | 407.3 | 433   |
| 474883 | 11    | 14.3  | 12.5  | 13.8  |
| 474860 | 30.4  | 25    | 26.5  | 25.2  |
| 474890 | 201.9 | 203.3 | 206.6 | 216.9 |
| 343792 | 39.7  | 35.8  | 33.6  | 59.3  |
| 460547 | 20.1  | 19.4  | 18.2  | 26.4  |
| 460409 | 91.8  | 68.4  | 57.7  | 76.3  |
| 460436 | 41.9  | 36.8  | 42.3  | 44.5  |
| 475354 | 20.6  | 19    | 22.9  | 18.5  |
| 475352 | 27.1  | 32.3  | 28.4  | 36.2  |
| 263283 | 38    | 33.4  | 36.8  | 39.3  |
| 263309 | 39.7  | 52.7  | 37.5  | 66.2  |
| 339631 | 18.3  | 23.8  | 25.2  | 27.2  |
| 339655 | 63    | 72.7  | 77.3  | 83.5  |
| 245544 | 35.5  | 43.3  | 57.1  | 46.6  |
| 419330 | 1.6   |       |       | 1.3   |
| 377901 | 3.1   | 2.3   | 1.7   | 2     |
| 438997 | 7.1   | 8.3   | 2.9   | 11.1  |
| 407043 | 9.8   | 7.1   | 7.3   | 10.1  |
| 460568 | 2     | 2     | 2.6   |       |
| 447787 | 7.1   | 3.2   | 8.9   | 2.6   |

|        |       |       |       |       |
|--------|-------|-------|-------|-------|
| 358276 | 2.2   | 2.5   | 2.8   | 3.1   |
| 448837 | 11.8  | 11.2  | 10.8  | 16.8  |
| 375533 | 76.9  | 75.8  | 71.6  | 64.9  |
| 404751 | 17.6  | 20.4  | 26.3  | 30.6  |
| 246343 | 26.9  | 39.6  | 31.8  | 39.4  |
| 448837 | 11.8  | 11.2  | 10.8  | 16.8  |
| 338606 | 46.2  | 49.2  | 40    | 58.8  |
| 345992 | 76.1  | 70.7  | 65.2  | 65.1  |
| 403056 | 75.2  | 117.6 | 129.6 | 134.7 |
| 387833 |       | 2     | 2.6   | 1.9   |
| 248584 | 70.3  | 77.7  | 73.2  | 69.2  |
| 339759 | 5.7   | 7.2   | 5.3   | 7     |
| 358126 | 2.9   | 5.9   | 8.1   | 5.6   |
| 404912 | 202.3 | 166.1 | 161.2 | 174.2 |
| 260007 | 44.7  | 39.6  | 34.4  | 44.1  |
| 403153 | 192.7 | 148.9 | 134.7 | 146.8 |
| 375456 | 126.4 | 122.5 | 143.1 | 123.7 |
| 381405 | 24.7  | 29.6  | 27.8  | 39.2  |
| 381472 | 77.6  | 54    | 50.9  | 56.2  |
| 381451 | 109.4 | 98.2  | 78.4  | 85.1  |
| 449787 |       |       | 2     | 2.6   |
| 397508 | 107.3 | 148.7 | 123.3 | 159.2 |
| 362950 | 5.4   | 3     | 3     | 6     |
| 362818 | 5.4   | 3.3   | 2.6   | 6.3   |
| 363110 | 3.1   | 2.3   | 2.7   | 2     |
| 375116 | 102   | 119.8 | 99.4  | 129.6 |
| 401371 | 7.5   | 6.3   | 5.7   | 7.8   |
| 402111 | 26.4  | 31.2  | 24.7  | 31.8  |
| 402209 | 24.5  | 21.8  | 17    | 23.3  |
| 418172 | 37    | 36.7  | 33.1  | 36.6  |
| 418049 | 9.9   | 12.7  | 9.5   | 9.2   |
| 466139 | 21.4  | 15    | 12.7  | 14.1  |
| 288235 | 14.3  | 12.9  | 13.3  | 19.5  |
| 324615 | 36.4  | 44    | 29    | 43.5  |
| 466144 | 29.4  | 17.8  | 16.5  | 20.6  |
| 324431 | 21.6  | 33    | 20.5  | 36.2  |
| 324320 | 2.3   | 2.1   | 2.1   | 3.2   |
| 291015 | 99.8  | 99.2  | 101   | 102.8 |
| 315508 | 2.5   | 3.3   | 3     | 7.6   |
| 462126 | 17.3  | 21    | 15    | 21.9  |
| 462019 | 20.5  | 25    | 17.3  | 21.5  |
| 274881 |       |       |       | 1.7   |
| 340047 | 15.6  | 19.4  | 25.4  | 24.8  |
| 461897 | 12.1  | 12.5  | 11.9  | 14.2  |
| 274967 | 13.3  | 14.6  | 9.7   | 14.5  |
| 275045 | 2.7   | 2.4   | 1.6   | 3.2   |
| 291152 | 24.8  | 20.3  | 22.6  | 22.4  |
| 462026 | 1.9   | 2.3   | 2.5   | 2     |
| 291112 | 34.2  | 29.1  | 32.5  | 28.1  |
| 315431 | 18.6  | 18.6  | 19.5  | 24.4  |
| 362710 |       |       | 2.2   |       |
| 337086 | 12.5  | 14.9  | 15.5  | 16.6  |



|        |      |      |      |      |
|--------|------|------|------|------|
| 460180 | 8.1  | 1.7  | 3.3  | 3.3  |
| 298528 | 1.5  | 1.7  | 5.5  |      |
| 266447 | 10.5 | 7.4  | 9.9  | 8.4  |
|        |      |      |      |      |
| 291004 | 6.4  | 6.1  | 9.3  | 7.7  |
| 284018 | 13.5 | 16.4 | 11.3 | 13.9 |
| 346964 | 2.4  | 2.2  | 2.8  | 2.8  |
| 292115 | 9.4  | 9.6  | 11.5 | 10.5 |
| 398508 | 9.4  | 5.2  | 7.6  | 6.1  |
|        |      |      |      |      |
| 466006 | 1.4  | 1.7  | 2.4  |      |
| 402092 | 9.5  | 9.9  | 9.2  | 11.8 |
| 307696 | 29.5 | 37.2 | 50.7 | 41.3 |
| 266357 | 10.6 | 8    | 8.8  | 10.5 |
| 398434 | 62.6 | 80.4 | 61.6 | 106  |
| 362869 | 2    | 2.2  | 2.3  | 2.1  |
| 384633 | 5.8  | 6.8  | 2.6  | 2.9  |
| 380872 | 33.6 | 26.6 | 27.6 | 31.8 |
| 396567 | 19.6 | 26   | 23.1 | 23.7 |
| 396667 | 11.8 | 11.7 | 12.4 | 10.8 |
| 396664 | 85.1 | 88.7 | 66.1 | 79.5 |
| 450977 | 12.1 | 23.6 | 17.7 | 15.2 |
| 374214 | 86.9 | 87.9 | 70.3 | 74.5 |
| 373673 | 16.4 | 21.5 | 23.6 | 24.5 |
| 455350 | 22.1 | 17.6 | 15.2 | 19   |
| 455252 | 46.4 | 36   | 43.3 | 50.8 |
| 436474 | 16.1 | 13.1 | 12.8 | 12.7 |
| 436387 | 38.4 | 42.5 | 34.9 | 38.3 |
| 436382 | 48.4 | 47.4 | 36.2 | 46.4 |
| 436249 | 10.2 | 14.4 | 11.5 | 12.9 |
| 435019 | 28.5 | 27.6 | 26.2 | 31   |
| 434916 | 48.7 | 54.7 | 38.4 | 52.7 |
| 437371 | 9.6  | 6.7  | 5.7  | 5.7  |
| 438222 | 9.9  | 9.9  | 8.6  | 8.2  |
| 432411 | 47.4 | 53.7 | 42.2 | 53.8 |
| 432404 | 66.7 | 77.4 | 56.9 | 76.3 |
| 432484 | 38.3 | 46.9 | 33.5 | 45.6 |
| 432318 | 35.6 | 41   | 33.2 | 38.8 |
| 432312 | 57.4 | 69.7 | 46.6 | 57.8 |
| 432491 | 30.2 | 37.6 | 25.7 | 33.5 |
| 432749 | 20.3 | 24.8 | 15.2 | 25.2 |
| 432670 | 10.7 | 12.5 | 9.1  | 11.1 |
| 432663 | 70.8 | 84.6 | 62.4 | 79.7 |
| 432576 | 19.5 | 25.8 | 15.6 | 26.7 |
| 432570 | 62.2 | 73.5 | 51.8 | 71.5 |
| 408241 | 12.8 | 15.5 | 11.3 | 15.9 |
| 408271 | 5.9  | 3.2  | 5.8  | 3.3  |
| 408443 | 7.2  | 2    | 5.6  | 2.7  |
| 402919 | 12.1 | 13.3 | 13.3 | 16.2 |
| 402794 | 15.3 | 12.9 | 7.8  | 11.2 |
| 417105 | 37.2 | 35.1 | 28.7 | 31.5 |
| 417099 | 20.6 | 17   | 15.4 | 17.5 |

|        |       |       |       |       |
|--------|-------|-------|-------|-------|
| 415940 | 2.5   | 2.2   | 1.9   | 2.5   |
| 409489 | 8.9   | 5.7   | 5.7   | 2.7   |
| 410129 | 27.4  | 20.5  | 16.5  | 14.7  |
| 474517 | 125.1 | 170.3 | 160.5 | 198.7 |
| 464508 | 30.4  | 52.5  | 48.2  | 76.5  |
| 463904 | 2.7   | 3.1   | 2.4   | 6     |
| 463653 | 16.3  | 18.1  | 17.2  | 18.1  |
| 474916 | 132.5 | 169   | 119.8 | 176.7 |
| 463791 | 6.1   | 6.2   | 6.9   | 3.1   |
| 475198 | 46.5  | 49.7  | 58.6  | 62.5  |
| 344871 | 6.9   | 9.1   | 9     | 8.9   |
| 342713 | 56.3  | 90.3  | 88.5  | 83.1  |
| 381033 | 12.7  | 13.3  | 9.6   | 13.5  |
| 450962 | 38.5  | 57.6  | 39.3  | 40.7  |
| 381687 | 16.6  | 16.7  | 9.9   | 18.6  |
| 373792 | 26.1  | 33    | 30.3  | 31.6  |
| 449448 | 13    | 13.4  | 13.6  | 11.6  |
| 432079 | 52.4  | 41.5  | 27    | 28.7  |
| 432079 | 52.4  | 41.5  | 27    | 28.7  |
|        |       |       |       |       |
| 374138 | 26.8  | 20.7  | 19.6  | 23.3  |
| 456882 | 45.2  | 44.3  | 36.9  | 55    |
| 381114 | 29.8  | 28.9  | 28.2  | 30.3  |
| 432035 | 11.1  | 10.6  | 9.1   | 8.7   |
| 432035 | 11.1  | 10.6  | 9.1   | 8.7   |
| 396740 | 33.8  | 32.7  | 24    | 30.8  |
| 387692 | 2.2   |       | 2.7   | 2.1   |
| 452461 | 33.7  | 28.8  | 17.7  | 27    |
| 374305 | 41.6  | 31.7  | 30.3  | 25.7  |
| 462524 | 12.6  | 7.4   | 9.1   | 10.5  |
| 416322 |       |       |       | 2     |
| 399633 | 228.4 | 254.4 | 177.1 | 206.8 |
| 436481 | 21.1  | 26.5  | 21.1  | 13.4  |
| 374226 | 40.4  | 35.2  | 34.8  | 37.1  |
| 399647 | 58    | 65.2  | 47.4  | 62.3  |
| 399735 | 76.7  | 79    | 54.8  | 66.1  |
| 409602 | 2.6   |       | 1.9   | 1.8   |
| 425262 | 2.1   | 7.1   | 7.9   | 3.1   |
| 374118 | 22.4  | 21.6  | 18.4  | 23.2  |
| 448153 | 5.9   | 3.2   | 8.4   | 5.3   |
| 444467 | 1.4   |       | 2.3   |       |
| 434803 | 9.9   | 9     | 8.2   | 9.6   |
| 381215 | 12.2  | 10.7  | 9.5   | 9.8   |
| 396424 | 152.4 | 151.4 | 110.5 | 128.2 |
| 455359 | 5.7   | 2.7   | 6.3   | 6.1   |
| 381019 | 100.4 | 106.5 | 80.3  | 103.5 |
| 432760 | 7.1   | 9     | 3.6   | 8.4   |
| 462537 | 5.5   | 5.2   | 6.2   | 5.5   |
| 279531 | 133.2 | 129.7 | 94.1  | 144.9 |
| 406979 | 7.3   | 6.5   | 5.7   | 6.6   |
| 456231 | 9.7   | 7.8   | 8     | 7.9   |
| 396243 | 17.4  | 21.9  | 19.6  | 22.2  |

|        |       |       |       |       |
|--------|-------|-------|-------|-------|
| 345011 | 43.2  | 41.5  | 24.9  | 37.7  |
| 396816 | 15.1  | 13.1  | 10.7  | 17.5  |
| 399843 | 17    | 17.6  | 11.5  | 13.9  |
| 387698 |       | 2.1   |       |       |
| 474690 | 1.5   | 1.3   |       |       |
| 399537 | 27.1  | 28.1  | 28    | 23.3  |
| 423753 | 9.8   | 10.9  | 9.6   | 9     |
| 408402 | 29.8  | 23.3  | 14.4  | 27.7  |
| 355525 | 2.9   | 2.6   | 2.2   | 1.3   |
| 396765 | 45    | 37.5  | 38.1  | 40.6  |
| 417307 | 2.9   | 5.1   | 2.6   | 6.7   |
| 370382 | 41.6  | 38.3  | 30.8  | 43.5  |
|        |       |       |       |       |
| 436851 | 3.3   | 5.4   | 2.6   | 5.5   |
| 283508 | 24.7  | 19    | 20    | 16    |
| 398816 | 17.8  | 14.8  | 14.1  | 23.5  |
|        |       |       |       |       |
| 376874 | 11.1  | 9.8   | 10    | 9.4   |
| 376758 | 25.6  | 27.9  | 29.6  | 28.9  |
| 422259 | 26.9  | 30.3  | 34.4  | 38.4  |
| 436562 | 15.1  | 16.2  | 15.2  | 18.3  |
| 436569 | 7     | 5.2   | 4.9   | 6.6   |
| 431836 | 32.7  | 34.5  | 35.8  | 43.5  |
| 431784 | 17.6  | 17.2  | 14.9  | 15.3  |
| 441378 |       |       | 1.7   |       |
| 418003 |       |       | 2.1   | 2.1   |
| 421964 | 31    | 24.6  | 28.4  | 34.8  |
|        |       |       |       |       |
| 420736 | 2.1   | 1.6   |       |       |
| 446622 | 178.9 | 222.2 | 229.2 | 231.7 |
| 446633 | 16.2  | 10.7  | 12.4  | 11.9  |
| 335387 | 159.9 | 169.1 | 169.7 | 166.2 |
| 468667 | 2.8   |       | 3.1   | 2.7   |
| 468550 |       | 1.6   | 2.3   | 2     |
| 311050 | 170.7 | 143.6 | 147.2 | 155   |
| 343504 | 17.9  | 24.8  | 24.3  | 18.7  |
| 345975 | 28.2  | 25.8  | 27.9  | 30.7  |
| 474981 | 45.1  | 43.9  | 36.6  | 47    |
| 351285 | 6.5   | 8.9   | 7.5   | 8.5   |
| 461362 | 14.4  | 14.5  | 12.8  | 17.1  |
| 461257 | 32.9  | 36.6  | 32.7  | 35.7  |
| 351137 |       | 2.1   | 3.1   |       |
| 425731 | 21.4  | 27.7  | 31.4  | 32.6  |
| 343547 | 56.3  | 63.7  | 67.1  | 60.6  |
| 436467 | 2.1   | 1.4   | 2.8   | 1.9   |
| 467386 | 7.7   | 10.1  | 10.7  | 14    |
| 340942 | 325.4 | 344.7 | 206.4 | 190.3 |
|        |       |       |       |       |
| 314643 | 11    | 9.5   | 12.7  | 8.6   |
| 339758 | 82.6  | 68.4  | 61.8  | 56.4  |
| 460252 | 12.7  | 12.6  | 12.9  | 9.8   |
| 335900 | 97.1  | 113.4 | 148.1 | 111.3 |

|        |       |       |       |       |
|--------|-------|-------|-------|-------|
| 345820 | 10.1  | 9.5   | 7.5   | 8.5   |
| 461161 | 15.1  | 12.8  | 12.1  | 13.6  |
| 452286 | 32.5  | 26.8  | 22.2  | 30.7  |
| 449214 | 6.8   | 5.5   | 9.3   | 5.3   |
| 390556 | 1.3   |       |       |       |
| 390517 |       |       |       | 1.4   |
|        |       |       |       |       |
| 354118 | 3.3   | 8.2   | 5.5   | 6.1   |
| 353994 | 6.6   | 9.6   | 8.2   | 7.6   |
| 375035 | 68.4  | 72.6  | 70.4  | 96.9  |
| 377984 | 8.6   | 7.1   | 10.2  | 8.8   |
| 377968 | 19.5  | 17.5  | 18.6  | 23.4  |
| 378625 | 46.8  | 41    | 37.8  | 49.4  |
| 378521 | 59.9  | 54.6  | 66    | 78.6  |
| 373713 | 65.3  | 52.5  | 92.3  | 63.2  |
| 377884 | 58.4  | 43.4  | 45.7  | 55.4  |
| 448920 | 5.4   | 2.3   | 2.8   | 3.1   |
| 419851 | 40.1  | 39.8  | 39.4  | 47.8  |
| 419865 | 5.6   | 5.4   | 5.7   | 4.8   |
| 446579 | 18.4  | 12.9  | 13.6  | 15.5  |
| 311940 | 18.9  | 21.8  | 17.4  | 40    |
| 293093 | 1.9   | 1.8   | 3.1   | 2     |
| 317852 | 72.3  | 60.7  | 65.5  | 78.7  |
|        |       |       |       |       |
| 300003 | 1.5   | 1.6   | 2.5   | 2.3   |
| 300074 | 44.2  | 36.9  | 42.4  | 52.9  |
| 300078 | 16    | 11.4  | 11.8  | 15.2  |
| 300148 | 2.7   | 1.6   | 1.3   | 1.5   |
| 345115 | 8.4   | 10.6  | 7.5   | 9     |
| 345264 | 20.6  | 16.9  | 21.7  | 17.4  |
| 252268 | 26.7  | 31.2  | 29.2  | 43.1  |
| 343238 | 79.5  | 64.7  | 51.4  | 72.6  |
| 263782 | 59.2  | 59.4  | 60.8  | 75.3  |
| 263900 | 23.4  | 24.4  | 22.3  | 28.9  |
| 264646 | 9     | 10.8  | 6.2   | 8.9   |
| 274938 | 2.5   | 3.2   | 2.8   | 2.4   |
| 274861 | 2.9   | 2.1   | 5.2   | 3.2   |
| 274940 | 7.1   | 7.5   | 11.1  | 8.3   |
| 252199 | 35.9  | 37.6  | 39.5  | 56.9  |
|        |       |       |       |       |
| 264794 | 123.9 | 123.9 | 107.9 | 145.3 |
| 448198 | 10.2  | 10.4  | 12.9  | 15.7  |
| 300146 | 3.1   | 2.1   | 2.5   |       |
| 264607 | 115.3 | 117.8 | 117.1 | 147.2 |
| 313581 | 16    | 14.6  | 12.7  | 17.7  |
| 372580 | 18.4  | 19    | 15.5  | 40.4  |
| 311901 | 20.7  | 26.9  | 23.2  | 29.7  |
| 374976 | 27.8  | 23.9  | 27.2  | 35    |
| 448292 | 7.2   | 7.9   | 7.3   | 11.4  |
| 398589 | 98.9  | 88.8  | 88.7  | 117.3 |
| 378449 | 8     | 11.4  | 14.4  | 13.2  |
| 448600 | 1.9   | 2.2   | 5     | 5.8   |

|        |       |       |       |       |
|--------|-------|-------|-------|-------|
| 423865 | 14.9  | 17.6  | 18.8  | 24.3  |
| 264476 | 145.3 | 145.4 | 160.9 | 192.8 |
| 311986 | 11.1  | 16.6  | 20.3  | 18.7  |
| 378534 | 112.3 | 102.1 | 96.2  | 121.9 |
| 263223 | 100   | 93.6  | 94.4  | 117.6 |
| 313516 | 31.7  | 26.8  | 25.2  | 32.9  |
| 262700 | 10.8  | 7.4   | 6.5   | 5.1   |
| 313429 | 46    | 47.1  | 53.6  | 64.3  |
| 448868 | 10.4  | 8.5   | 9.4   | 8.5   |
| 398481 | 127   | 121.1 | 130   | 173.5 |
|        |       |       |       |       |
| 264461 | 143.5 | 163.1 | 197.9 | 216.1 |
| 376049 | 89.2  | 75.3  | 75.9  | 85.9  |
| 299366 | 1.3   |       |       |       |
| 252123 | 135   | 132.8 | 143.8 | 195.2 |
| 264709 | 70    | 69.7  | 73.9  | 81.9  |
| 312188 | 39.5  | 36.9  | 34.6  | 40.8  |
| 263696 | 29.6  | 26.5  | 43.8  | 35.5  |
| 274859 | 2.9   | 2.7   |       | 2.9   |
| 337441 | 58.2  | 56.9  | 55.7  | 62.6  |
| 370732 | 39.8  | 36.7  | 43.2  | 49.4  |
| 312928 | 41.4  | 45.3  | 44.1  | 47.6  |
| 393898 | 22.9  | 26.5  | 30.9  | 41.4  |
| 313056 | 18.9  | 16.3  | 21.5  | 19    |
| 326402 |       |       | 1.8   |       |
| 263343 | 28.6  | 25.9  | 29.3  | 30.4  |
| 452282 | 2     | 1.7   | 1.7   | 7.1   |
| 449982 | 166.9 | 149.2 | 161.3 | 123.4 |
| 449923 | 73.1  | 67.8  | 77.3  | 66.7  |
| 449980 | 75.4  | 72.5  | 60    | 54.1  |
| 457481 | 45.1  | 40.8  | 36    | 33.2  |
| 355399 | 18.1  | 16.5  | 15.8  | 16.8  |
| 360030 |       | 3     | 1.9   | 2     |
| 426483 | 21.2  | 15.5  | 22.7  | 19.4  |
| 427229 | 16.3  | 15.7  | 15.7  | 15.6  |
| 427218 | 180.3 | 162   | 161.2 | 165.5 |
| 427140 | 86.9  | 86.6  | 87.1  | 87.1  |
| 427287 | 212.2 | 182.5 | 170.5 | 167.2 |
| 439354 | 18.1  | 12.2  | 12.9  | 12.8  |
| 439353 | 15.5  | 11.1  | 7.8   | 8.9   |
| 399089 | 82.8  | 73    | 72.5  | 65.4  |
| 418812 | 2.7   | 1.9   | 6.4   | 3.1   |
| 422212 | 106.5 | 84.3  | 95.5  | 80.8  |
| 422209 | 92.6  | 72.9  | 92.3  | 87.4  |
| 409709 | 10.5  | 9.6   | 10.6  | 11.3  |
| 328076 | 25.2  | 17.3  | 20.6  | 18    |
| 328007 | 2.4   | 3.1   | 1.4   | 2.4   |
| 287113 | 109.6 | 101.7 | 105.3 | 98.7  |
| 287160 | 19.2  | 17.5  | 19.6  | 19    |
| 314115 | 30.4  | 21.2  | 28.1  | 27.6  |
| 310307 | 107.8 | 115.8 | 109.1 | 117.4 |
| 311621 | 16.1  | 11.6  | 14.3  | 12.8  |

|        |       |       |       |       |
|--------|-------|-------|-------|-------|
| 311612 | 33.2  | 27.9  | 29.1  | 31    |
| 460264 | 33.7  | 26.5  | 29.2  | 35.1  |
| 460247 | 12.4  | 13    | 14.5  | 12.6  |
| 460381 | 40.2  | 35.4  | 44    | 33.4  |
| 457871 | 33.9  | 28.4  | 43.8  | 29    |
| 475119 | 48.6  | 50.3  | 59.4  | 68.5  |
| 426419 | 189.8 | 164.5 | 210.1 | 168.2 |
| 318770 | 24.8  | 27.1  | 32.9  | 22.9  |
| 439221 | 8.1   | 10.5  | 8.4   | 7.9   |
| 286799 | 11.4  | 13.3  | 15.3  | 12.8  |
| 373878 | 162.3 | 156.7 | 169.4 | 161.4 |
| 398489 | 24.2  | 26.9  | 29.4  | 25.9  |
| 457368 | 10.7  | 6.5   | 7.5   | 7.2   |
| 426394 | 18.9  | 14    | 19.8  | 16.9  |
| 280905 | 23.1  | 25.7  | 38    | 37    |
| 457868 | 16.8  | 15.1  | 14.1  | 18.1  |
| 287607 | 9.4   | 11.2  | 8.5   | 9     |
| 310636 | 53.3  | 47.8  | 54.4  | 47.8  |
| 433432 | 6.6   | 8     | 11.3  | 3.2   |
| 374001 | 117.7 | 97.5  | 100.2 | 102.6 |
| 287004 | 37.5  | 33.1  | 49.7  | 34.3  |
| 449353 | 17.6  | 14.6  | 19.2  | 20.3  |
| 426349 | 32.7  | 26    | 34.5  | 29.5  |
| 342806 | 11.4  | 12.1  | 16.1  | 10.5  |
| 427145 | 9.1   | 9.1   | 9.3   | 6.6   |
| 398982 | 74.5  | 42.3  | 39.2  | 45.6  |
| 373784 | 37.5  | 38.5  | 39.9  | 44    |
| 318784 | 1.7   | 6.4   | 4.6   | 6.3   |
| 425684 | 15.1  | 9     | 14.5  | 11    |
|        |       |       |       |       |
| 417663 | 2.7   | 2     | 2.4   | 2.1   |
| 428787 | 2.5   |       | 2     |       |
| 399213 | 88.6  | 72.8  | 99.3  | 72.6  |
| 373890 | 12.1  | 8.2   | 8.8   | 10.2  |
| 390099 | 2.1   | 2.1   | 1.7   | 2.1   |
| 286703 | 11.4  | 10.1  | 14.2  | 16.5  |
| 457394 | 15    | 14.2  | 16.1  | 15.5  |
|        |       |       |       |       |
| 439217 | 2.7   | 3.1   | 2.6   | 1.7   |
| 379210 | 5.1   | 2.6   |       | 6.4   |
| 379171 | 5.7   | 8.6   | 3.1   | 8.9   |
| 396009 | 59.5  | 54.8  | 48    | 40.4  |
| 365827 | 2.1   | 5.2   | 2.6   | 2.5   |
| 429094 | 31.6  | 38.7  | 25.5  | 35.6  |
| 411205 | 6.2   | 3.3   | 2.5   | 2.9   |
| 283316 | 111.6 | 71.1  | 65    | 72    |
| 462135 | 16    | 17.7  | 12    | 16.1  |
| 276112 | 2.5   | 5     | 3     | 9.1   |
| 276052 |       |       |       | 1.5   |
| 289690 | 23.2  | 16.7  | 17.6  | 18    |
| 450212 | 10.9  | 14.9  | 11.3  | 13.5  |
| 384776 | 10.8  | 9.8   | 12.3  | 9.2   |

|        |      |      |       |       |
|--------|------|------|-------|-------|
| 312151 | 69.8 | 83.1 | 78.9  | 96.1  |
| 453248 | 36.5 | 48.5 | 41.9  | 42.3  |
| 287427 | 45.1 | 44.1 | 51.8  | 46.8  |
| 327562 | 5    | 5.1  | 5.5   | 5.1   |
| 369974 | 22.1 | 25.5 | 22.9  | 22.1  |
| 454656 | 77.6 | 81.2 | 80.7  | 84.8  |
| 401477 | 42.7 | 34.3 | 24.1  | 43.2  |
| 429747 | 6.9  | 6.9  | 6.9   | 7.4   |
| 291582 | 13.8 | 12.5 | 18.7  | 10.7  |
| 373972 | 75.5 | 58.6 | 16.9  | 13.9  |
| 411345 | 6.5  | 6.9  | 7.6   | 8.7   |
| 310243 | 60.3 | 86   | 78.6  | 102.7 |
| 405681 | 17.8 | 16.3 | 17.4  | 14.3  |
| 384283 | 1.7  | 1.5  |       | 1.9   |
| 384902 | 2.8  |      | 2.3   | 2.6   |
| 384885 | 3.3  | 2.8  | 2.2   | 2.2   |
| 383335 |      |      | 1.9   |       |
|        |      |      |       |       |
| 385358 | 2.5  | 1.6  | 1.5   |       |
| 396822 | 49.3 | 47.9 | 52.5  | 44.3  |
| 397133 | 8.2  | 9.9  | 31.3  | 3     |
| 397316 | 46.4 | 49   | 80    | 38.2  |
| 397282 | 75.7 | 83.9 | 112.1 | 55.9  |
| 397224 | 39.1 | 34.5 | 66.2  | 28.2  |
| 397220 | 4.9  | 2.2  | 9.1   |       |
| 397186 | 76.6 | 86.6 | 130.6 | 61.6  |
| 355401 | 2.1  | 2.2  | 1.4   | 2     |
|        |      |      |       |       |
| 358493 | 2.4  | 3    | 3.3   | 4.8   |
|        |      |      |       |       |
| 356732 | 39.1 | 35.7 | 42.1  | 38.8  |
| 356563 | 1.8  | 2.5  | 1.7   | 2.8   |
| 356427 | 15.3 | 10.4 | 18    | 14.4  |
| 356424 | 2.5  | 2.1  | 2.3   | 1.6   |
| 356314 | 15.7 | 13.4 | 16.8  | 14.1  |
| 356311 | 2.2  | 2.5  | 2.4   |       |
|        |      |      |       |       |
| 356149 | 35.5 | 41.7 | 43.7  | 37.9  |
| 356146 | 9.8  | 9.4  | 10.1  | 9.1   |
| 356564 | 16   | 12.4 | 14    | 11.9  |
| 358007 | 4.9  | 3.3  | 5.9   | 5.6   |
| 357556 | 8.4  | 7.2  | 8.9   | 8.1   |
| 357273 | 6.6  | 5.4  | 5.9   | 6.3   |
| 378321 | 37.5 | 33.6 | 34.8  | 35.6  |
| 378224 | 25.2 | 21.2 | 26.1  | 27.6  |
| 378223 | 65   | 55.6 | 54.1  | 54.1  |
| 378115 | 50.6 | 53.3 | 63.3  | 60.9  |
| 378114 | 81.5 | 82.8 | 76.7  | 73.5  |
| 377568 | 30.8 | 30.7 | 29.7  | 26.1  |
| 377563 | 15.1 | 15.3 | 12.9  | 13    |
|        |      |      |       |       |
| 443720 | 1.6  | 2.2  | 1.8   | 2.9   |

|        |      |      |       |       |
|--------|------|------|-------|-------|
| 443756 |      | 1.5  |       | 2     |
| 443758 | 2.1  | 3.3  | 3.2   | 3     |
|        |      |      |       |       |
|        |      |      |       |       |
| 443594 | 2.3  | 2.4  |       | 2     |
|        |      |      |       |       |
| 443807 | 1.4  | 3.1  |       |       |
|        |      |      |       |       |
| 443054 | 2.4  | 2.4  |       |       |
| 443048 |      | 2    | 2     | 1.6   |
| 442913 | 2.4  | 2    | 1.8   | 2.4   |
| 442919 | 5.9  | 2.9  | 3.3   | 2.6   |
|        |      |      |       |       |
| 443128 |      |      | 2.5   | 1.9   |
| 443197 |      | 1.7  | 1.5   |       |
| 443266 | 3.1  |      |       | 1.9   |
| 444241 | 31.4 | 14.6 | 17.7  | 11.2  |
| 445205 | 9.2  | 10.8 | 9.9   | 10.5  |
| 445341 | 43.3 | 37.5 | 37.6  | 42.6  |
| 445383 | 22.3 | 18   | 20.7  | 16.9  |
| 445293 | 41.6 | 32.5 | 36.2  | 34.2  |
| 445175 | 39.7 | 32.6 | 32.3  | 31.9  |
| 445055 | 24.2 | 20.2 | 27.5  | 24.4  |
| 445141 | 33   | 25.9 | 27.7  | 27.5  |
| 445481 | 40.7 | 32.4 | 35.7  | 31.3  |
| 445483 | 30.6 | 25.3 | 23.5  | 27.4  |
| 445539 | 37.9 | 30.5 | 39.8  | 32    |
| 445580 | 9.7  | 9    | 9.1   | 10.1  |
| 444562 | 1.6  | 1.8  |       | 1.6   |
| 444260 | 27.2 | 12.4 | 16.1  | 13.9  |
| 444261 | 2.5  | 2.9  | 1.7   |       |
| 444368 | 1.8  |      |       | 2.1   |
| 425830 | 58.3 | 52   | 49.9  | 45.4  |
| 425766 | 74.6 | 68.8 | 64.8  | 64.1  |
|        |      |      |       |       |
| 442819 | 5.4  | 3    | 8.7   | 6.4   |
|        |      |      |       |       |
| 440566 | 2.9  | 2.5  |       | 1.6   |
| 435120 | 10.8 | 8.3  | 6.5   | 9.7   |
| 435107 | 6.7  | 3.2  | 2.7   | 2.9   |
| 435000 | 2.4  | 2.2  | 2.4   | 2.8   |
| 435340 | 107  | 95.5 | 106.3 | 107.5 |
| 435467 | 47   | 43.2 | 46.2  | 45.3  |
| 435462 | 31.1 | 30.4 | 26.9  | 28.3  |
| 435350 | 39.6 | 38.9 | 35.2  | 37.5  |
| 442336 | 2.4  |      |       | 1.7   |
| 442715 | 2.1  | 2    |       | 1.4   |
| 442723 | 9.2  | 7.6  | 10    | 10.4  |
| 442755 | 2.5  | 1.8  | 2.7   | 3.2   |
| 442473 | 11.5 | 12.6 | 10.4  | 10.8  |
| 442478 | 19.7 | 19.7 | 18.7  | 20.2  |



|        |       |       |       |       |
|--------|-------|-------|-------|-------|
| 442504 | 7.8   | 5.8   | 7.6   | 7.1   |
| 442637 | 2.8   | 2.6   | 5.6   | 3.3   |
| 442642 | 12.2  | 11    | 10.7  | 11.9  |
| 408126 | 31.9  | 31.9  | 31.6  | 28.3  |
| 408121 | 9.6   | 7.6   | 10.5  | 10.2  |
| 408108 | 7.3   | 5.4   | 6.6   | 2.6   |
| 408079 | 13.7  | 11    | 12.3  | 9.6   |
| 408068 | 23.7  | 21.1  | 23.9  | 23.8  |
| 408066 | 5.4   | 5.2   | 4.4   | 2.2   |
| 407975 | 5.7   | 16.1  | 5.9   | 16.5  |
| 408248 | 22.9  | 22.7  | 21.4  | 23.1  |
| 408257 | 12.2  | 12    | 9.3   | 7.5   |
| 408594 | 5     | 5     | 2.9   | 2.5   |
| 408555 | 6.9   | 6.4   | 5.4   | 6.3   |
| 408467 | 19.8  | 17.8  | 17.9  | 16.4  |
| 408463 | 2.3   | 2.2   | 1.7   | 2     |
| 408414 | 17.4  | 14    | 12.9  | 15.4  |
| 446665 | 39.4  | 30.2  | 38.1  | 27.6  |
| 408299 | 17.9  | 21.1  | 19.2  | 19.3  |
| 408295 | 6.8   | 7.3   | 10.6  | 6.7   |
| 407178 | 25.6  | 19.1  | 20.9  | 17    |
| 407142 | 132.3 | 109   | 126.6 | 116   |
| 407118 | 2     |       | 2.3   |       |
|        |       |       |       |       |
| 407256 | 141.6 | 117.9 | 128.4 | 130.2 |
| 407482 | 56.4  | 47.4  | 52    | 50.5  |
| 407359 | 53.3  | 46    | 44.7  | 51.1  |
| 407310 | 7     | 2.8   | 2.8   | 5.3   |
| 400564 | 65.5  | 45.3  | 27.2  | 43.1  |
| 400579 | 14.1  | 11.1  | 8.5   | 11.3  |
| 401075 | 39.2  | 39.2  | 40.7  | 47.8  |
| 403712 | 4.5   | 2.1   | 3.6   | 5.1   |
| 446134 | 2.4   | 3     |       | 2.3   |
| 446141 | 24.9  | 31.3  | 28.7  | 29.5  |
| 445892 | 8.9   | 8.2   | 9.6   | 8.4   |
| 418956 | 4.6   | 2.3   | 3.3   | 3     |
| 418857 | 1.3   |       |       |       |
|        |       |       |       |       |
| 445955 | 30.8  | 28.1  | 32.3  | 27.9  |
|        |       |       |       |       |
| 445960 | 13.2  | 15.5  | 17.9  | 13.1  |
|        |       |       |       |       |
| 421572 |       |       | 2.4   |       |
| 421235 | 6.3   | 6     | 6.3   | 7.3   |
| 421106 | 9.7   | 5.6   | 7.6   | 8.4   |
| 421036 | 25.8  | 17.3  | 26.1  | 21.2  |
| 445677 | 48.4  | 53.4  | 42.6  | 40.1  |
| 445720 | 12.1  | 9.3   | 10.6  | 9.1   |
| 421050 | 21.9  | 13.9  | 18.1  | 15.7  |
| 446368 | 85    | 78.2  | 74    | 75.1  |
| 446393 | 7     | 5.6   | 3.1   | 5.7   |
| 415211 | 3     |       | 2.8   | 1.6   |

|        |        |        |        |        |
|--------|--------|--------|--------|--------|
| 474419 | 13.2   | 15.1   | 14.2   | 16.6   |
| 466577 | 7.8    | 5.3    | 2.6    | 5.4    |
| 474419 | 13.2   | 15.1   | 14.2   | 16.6   |
| 466589 | 2.2    |        | 3.1    | 2.9    |
| 463615 | 22.2   | 23.4   | 37.7   | 29.3   |
| 474917 | 35.5   | 38.7   | 41.9   | 47.4   |
| 474910 | 2384.8 | 2889.3 | 3246.5 | 3736.1 |
| 468741 | 1.5    |        | 2.1    | 3.3    |
| 472159 | 25.1   | 22.7   | 21.7   | 34.4   |
| 472784 | 2.7    | 1.5    | 1.7    |        |
| 471483 | 17.5   | 12.2   | 12.9   | 8.1    |
| 473494 | 19.5   | 16.8   | 13.7   | 18     |
| 472966 | 25.3   | 23.4   | 27.8   | 30.5   |
| 472867 | 2.9    | 3.1    | 2.1    | 2      |
| 472848 | 12.2   | 15.4   | 13     | 13.2   |
| 473081 | 16.5   | 17.3   | 16.6   | 14.2   |
| 460203 | 33     | 31.5   | 32.5   | 35.8   |
| 460052 | 27.8   | 32.1   | 30.3   | 36.2   |
| 460404 | 81.5   | 64.9   | 60.6   | 81.1   |
| 343119 | 38.5   | 28.5   | 32     | 31.3   |
| 460513 | 52.8   | 40     | 33.2   | 80.6   |
| 342964 | 111    | 128.9  | 148.7  | 137.6  |
| 459292 | 5.9    | 5.9    | 7.2    | 3.4    |
| 459292 | 5.9    | 5.9    | 7.2    | 3.4    |
| 345804 | 25.7   | 16.7   | 15.3   | 20.2   |
| 278706 | 2.5    | 1.8    | 6.1    |        |
| 474962 | 344.9  | 328.9  | 332.7  | 295.1  |
| 474963 | 49.6   | 45.5   | 45     | 40.6   |
| 474993 | 408.7  | 308.1  | 189.2  | 165.3  |
| 355720 | 69.2   | 89.4   | 83.5   | 109.2  |
|        |        |        |        |        |
| 367477 | 6      | 2.4    | 3      | 6.3    |
| 401131 | 25.6   | 29.4   | 34.9   | 29     |
| 407221 | 10.7   | 7.3    | 6.9    | 9.9    |
|        |        |        |        |        |
| 403541 | 39.9   | 33.9   | 39.7   | 35.3   |
| 357137 |        |        | 1.4    |        |
| 343146 | 15.3   | 15.2   | 10.6   | 13.2   |
| 445837 | 6.6    | 6.4    | 6.4    | 6.9    |
| 348579 | 16.4   | 12.6   | 16.9   | 13.7   |
| 473260 | 92.9   | 73.5   | 71.3   | 75.9   |
| 309538 | 11.7   | 12     | 19.4   | 12.4   |
| 425726 | 24.5   | 22.5   | 26.2   | 21.9   |
| 303207 | 22.7   | 2.6    | 56.4   | 1.7    |
| 315308 | 46.7   | 71.4   | 103.3  | 66.4   |
| 377493 | 22.7   | 16.6   | 18.7   | 21     |
| 473381 | 54.8   | 45.1   | 44.7   | 49.5   |
| 459419 | 1.7    |        |        |        |
| 428814 | 39.4   | 34.8   | 30.9   | 32.7   |
| 473507 | 5.3    | 2.2    | 5.2    | 5.9    |
| 374518 | 29.1   | 19.5   | 18.1   | 18.1   |
| 470887 | 2.2    |        | 2.1    | 2.2    |

|        |       |       |       |       |
|--------|-------|-------|-------|-------|
| 444747 | 6.7   | 1.6   | 2.9   | 3.3   |
| 342433 | 14.2  | 11.7  | 16    | 16    |
| 464089 | 48.6  | 48.4  | 47.4  | 45.9  |
| 403617 | 5.5   | 5.1   | 2.8   | 4.6   |
| 348851 | 12.9  | 9.7   | 13.2  | 12    |
| 403531 | 49.3  | 40.4  | 38.8  | 36.8  |
| 403041 | 11.3  | 9.7   | 7.6   | 8.1   |
| 356902 | 14.4  | 8     | 16.7  | 7.7   |
|        |       |       |       |       |
| 407610 | 17.1  | 16.5  | 13.7  | 16.5  |
| 278640 | 11.6  |       | 43.4  |       |
| 346189 | 15.6  | 14.3  | 18.7  | 11.8  |
| 397397 | 81.6  | 62.7  | 74.6  | 51.7  |
| 473242 | 2.5   | 3.5   | 2.8   | 1.4   |
| 473669 | 26.7  | 19.2  | 24.2  | 25.2  |
| 428290 | 5.2   | 5.9   | 5.7   | 7.6   |
| 397119 | 60    | 54.6  | 190.7 | 35.6  |
| 430384 | 25.5  | 22.8  | 16.3  | 20.6  |
| 430446 | 26.9  | 20.7  | 20.5  | 22.7  |
| 430567 | 21.3  | 15.3  | 14    | 14.2  |
| 433820 | 41.1  | 28    | 35.5  | 34.3  |
| 442335 | 8.3   | 6.4   | 8     | 11.9  |
| 429267 | 21.9  | 20.5  | 19.6  | 22.7  |
| 379439 | 69.2  | 56.4  | 37.1  | 58.5  |
| 445758 | 2.9   | 3.1   | 2     | 2.1   |
| 473467 | 8.4   | 6.7   | 8     | 3.4   |
| 342851 | 125.1 | 121.2 | 113   | 122.6 |
| 403432 | 53.9  | 48.9  | 51.3  | 47.2  |
| 408287 | 5.3   | 2.7   | 5.9   | 2.5   |
| 367426 |       |       | 1.6   |       |
| 452290 | 2.8   | 3.2   | 6.1   | 6.4   |
| 418649 | 5.9   | 5.5   | 8.3   | 5.5   |
| 403051 | 16.4  | 11.7  | 17.7  | 17.5  |
| 348279 | 16.9  | 16.2  | 19    | 19.4  |
| 452235 | 13.4  | 11.2  | 10.6  | 16.4  |
| 433441 | 27.1  | 41.2  | 23.7  | 50.6  |
| 407609 | 3.2   | 5.4   | 2.8   | 6.2   |
| 396748 | 50    | 39.4  | 41.8  | 30    |
| 348455 | 9.1   | 7.6   | 6.9   | 7     |
| 444564 | 2.2   | 2.8   | 1.7   | 2.5   |
| 430466 | 59.5  | 47.1  | 36    | 38.7  |
| 403141 | 67.3  | 68.2  | 78.4  | 77.5  |
| 397196 | 82.3  | 70.3  | 203.2 | 43.3  |
| 407734 | 5.1   | 2.6   | 2.3   | 5.7   |
| 348465 | 147.4 | 131   | 136.4 | 108.7 |
| 403663 | 16.7  | 16.5  | 15.8  | 19.2  |
| 398715 | 32.6  | 29.6  | 28.4  | 41    |
| 408435 | 13.9  | 8.7   | 12.8  | 7     |
| 343250 | 13.5  | 13    | 11.1  | 10    |
| 340039 | 41.7  | 30.1  | 31.6  | 35.7  |
| 409859 | 7.6   | 2     | 5.7   | 5.9   |
| 398781 | 50.8  | 66.7  | 44.1  | 86.5  |

|        |       |       |       |       |
|--------|-------|-------|-------|-------|
| 452591 | 46.4  | 42.5  | 43.5  | 54.8  |
| 452284 | 43.9  | 32.9  | 34.8  | 35.6  |
| 397111 | 64.4  | 58.1  | 62.8  | 57.9  |
| 396802 | 31.8  | 24.6  | 19.2  | 29.2  |
| 338548 | 22.9  | 23.2  | 23.8  | 20.6  |
| 378408 | 19    | 18.3  | 18.7  | 15.8  |
| 375663 | 23.1  | 27.4  | 19.2  | 25.4  |
| 472168 |       |       | 1.7   |       |
| 464248 | 25.8  | 18.2  | 21.1  | 19.6  |
| 403417 | 99.1  | 84.3  | 80.2  | 74.2  |
|        |       |       |       |       |
| 403881 | 14.6  | 11.1  | 15.2  | 12.8  |
| 429556 | 14.7  | 12.4  | 11.7  | 11.8  |
| 338564 | 118.1 | 95.7  | 81    | 85.5  |
| 403287 | 135   | 119   | 141.1 | 118   |
| 458208 |       | 1.3   |       |       |
|        |       |       |       |       |
| 343009 | 129.8 | 114.9 | 114.6 | 101.5 |
| 464114 | 36.5  | 34.5  | 37.8  | 42.2  |
| 440314 |       | 1.5   |       |       |
| 470626 |       |       |       | 2.4   |
| 340946 | 26    | 20.4  | 25.7  | 20.7  |
| 285380 | 36.8  | 37.6  | 38.2  | 42.1  |
| 466359 | 2     |       | 1.6   | 1.9   |
| 342548 | 12.6  | 9.6   | 9.3   | 7.5   |
| 471788 | 2     | 1.5   | 1.9   | 2     |
| 375171 | 36.1  | 23.5  | 19.5  | 37.3  |
| 378324 | 5.9   | 3.2   | 6.5   | 2.9   |
| 473105 | 216.5 | 189.8 | 188.5 | 187.6 |
| 409220 | 2.3   | 1.3   | 1.8   |       |
| 379378 | 8     | 2.7   | 3     | 6.9   |
| 382076 | 5.7   | 6     | 6.2   | 6.4   |
| 346840 | 14.1  | 13.3  | 12.3  | 14.2  |
| 403132 | 89.1  | 87.2  | 95    | 80.6  |
| 430543 | 13.9  | 9.7   | 8.4   | 11.2  |
| 472048 | 3.4   |       | 3.2   | 1.7   |
| 399234 | 29    | 19.4  | 28.4  | 23.8  |
| 348441 | 131.1 | 128.8 | 134.4 | 121.1 |
| 473618 | 2.9   | 1.6   | 2.6   | 2.4   |
| 343437 | 10.3  | 8.1   | 7.5   | 6.4   |
| 348275 | 16.8  | 17.7  | 18.9  | 16    |
| 406884 | 1.4   |       |       |       |
| 345956 | 33.8  | 32.5  | 26.7  | 43.9  |
| 417619 | 1.9   |       | 1.5   |       |
| 357749 | 5.7   | 3.2   | 3     | 7.8   |
| 342409 | 38.3  | 34.3  | 37    | 33.7  |
| 379653 | 11.4  | 10.4  | 7.9   | 9.1   |
| 343282 | 7.9   | 3.3   | 8.9   | 6.6   |
| 408921 | 2.1   | 1.9   | 7.4   | 2.8   |
| 397029 | 32.4  | 26.5  | 59.6  | 26.3  |
| 411424 | 19.5  | 13.5  | 12    | 14.4  |
| 473354 | 2     | 2.8   | 2.3   | 2.1   |

|        |      |       |      |       |
|--------|------|-------|------|-------|
| 375779 | 30.1 | 31.3  | 28.4 | 28    |
| 342577 | 27.7 | 25.9  | 29.8 | 25.6  |
| 476420 | 26.8 | 7     | 12.8 | 2.5   |
|        |      |       |      |       |
| 445043 | 5.3  | 1.5   | 1.7  | 2.2   |
| 375501 | 10.5 | 9.1   | 6.4  | 11.5  |
| 459194 | 10.8 | 7.2   | 16.6 | 9.5   |
| 434988 |      | 2.1   | 1.5  | 1.8   |
| 444567 | 2.8  |       | 2.9  | 2.7   |
| 342280 | 42.4 | 34.5  | 39.2 | 38.5  |
| 395004 | 32.5 | 30.1  | 30.7 | 27.1  |
| 377992 | 29   | 24.9  | 27.5 | 26.5  |
| 440330 | 1.5  |       | 1.3  | 2.4   |
| 425742 | 6.8  | 9.6   | 10   | 10.4  |
| 403763 | 10.6 | 9.2   | 14.9 | 8.4   |
| 405554 | 10.8 | 10.9  | 8.6  | 11.8  |
| 375427 | 6.8  | 5.3   | 2.8  | 3.3   |
| 433570 |      | 1.7   | 1.4  | 1.3   |
| 407929 | 3.3  | 1.8   | 2.2  | 2.2   |
| 342886 | 7.3  | 8.1   | 7.2  | 8.6   |
| 344645 | 14.8 | 16.5  | 15.7 | 15.3  |
| 384279 | 11.1 | 8.7   | 9.1  | 8.7   |
| 453178 | 9    | 11.5  | 8.5  | 13.9  |
|        |      |       |      |       |
| 382805 | 41.1 | 53.3  | 32.4 | 61    |
| 382792 | 10.3 | 14.3  | 9.8  | 14    |
| 382784 | 17.9 | 25.9  | 16.6 | 31.4  |
| 382698 | 38.4 | 56.1  | 38.1 | 61.5  |
| 449527 | 3.2  | 2.7   | 5.4  | 2.5   |
| 355512 | 19.6 | 24.7  | 15.9 | 24.8  |
| 355348 | 9.4  | 16.1  | 9    | 13.6  |
| 355527 | 7.6  | 6.4   | 2.6  | 5.6   |
| 353196 | 13.1 | 13.8  | 12.4 | 13.1  |
| 377415 | 112  | 140.3 | 99.3 | 158.4 |
| 377462 | 42.4 | 82    | 60.7 | 95.8  |
| 377499 | 35.8 | 47.8  | 37.9 | 59.8  |
| 432133 | 11.6 | 14.3  | 7.7  | 15.4  |
| 432129 | 30.8 | 37.7  | 24.1 | 38.6  |
| 432841 | 8.1  | 7.4   | 5.8  | 9     |
| 432039 | 18.5 | 13.1  | 19.7 | 22.9  |
| 406476 | 5.8  | 7.7   | 3.5  | 6.2   |
| 447954 | 10.3 | 9.1   | 12.5 | 14.1  |
| 405189 | 18.2 | 21    | 12   | 23.3  |
| 405187 | 9.2  | 10.2  | 7    | 11.8  |
| 406537 | 3    | 5.7   | 1.9  | 6.4   |
| 406538 | 3    | 6.6   | 2.4  | 5.8   |
| 408074 | 13.4 | 13.4  | 7.9  | 8.4   |
| 408057 | 64.8 | 68.1  | 43.4 | 44.8  |
| 406571 | 9.5  | 19.1  | 12.5 | 16.3  |
| 399051 | 24.4 | 29.2  | 19.3 | 32    |
| 399642 | 3.2  | 8.5   | 10.2 | 8.4   |
| 403079 | 10.3 | 13.2  | 8.1  | 13.3  |

|        |       |       |       |       |
|--------|-------|-------|-------|-------|
| 402972 | 37.4  | 65.9  | 42.2  | 62.4  |
| 402948 | 10.4  | 21.3  | 11.1  | 17.5  |
| 402835 | 2.9   | 3.2   | 2.8   | 3     |
| 403261 | 13.7  | 13.3  | 8.7   | 9.4   |
| 415903 | 2.1   | 2.1   | 1.6   | 2.6   |
| 415890 | 32.7  | 24.7  | 21.7  | 26.2  |
| 335077 | 99.7  | 133.7 | 125.5 | 139.1 |
| 283539 | 25.3  | 28.8  | 34.7  | 33.9  |
| 283621 | 42.3  | 47.5  | 40.1  | 41.6  |
| 327565 | 2.3   | 2.7   | 2.1   | 2.5   |
| 307597 | 6.3   | 8.3   | 7.5   | 8.5   |
| 475149 | 30.4  | 33.7  | 34.3  | 35.4  |
| 347342 | 15.8  | 16.1  | 11.3  | 14.7  |
| 347217 | 9.6   | 11.7  | 10.3  | 12.8  |
| 347456 | 15.9  | 17.4  | 10.3  | 14.4  |
| 346785 | 12.4  | 13.6  | 10.1  | 14.3  |
| 346946 | 20.4  | 25.9  | 16.5  | 18    |
| 347090 | 7.8   | 12.5  | 10.1  | 13.2  |
| 346347 | 48.2  | 48.7  | 54.6  | 50.9  |
| 346498 | 73.9  | 89.9  | 80.4  | 101.1 |
| 346640 | 43.8  | 54.7  | 45.9  | 63.3  |
| 272499 | 22.5  | 33.2  | 20.3  | 38.3  |
| 272507 | 33.6  | 51.2  | 27.7  | 51.6  |
| 272404 | 27.5  | 39.2  | 13.4  | 21.2  |
| 272160 | 42.8  | 94.7  | 63    | 101.2 |
| 272299 | 56.9  | 91    | 53.7  | 107.5 |
| 272296 | 84.9  | 146.7 | 84.1  | 146.8 |
| 407922 | 9.9   | 8.2   | 5.5   | 9.4   |
| 399049 | 108.4 | 119.1 | 71.6  | 116   |
| 349828 | 67    | 81.1  | 54.9  | 79.3  |
| 307619 | 138.7 | 190.9 | 101.5 | 185.4 |
| 272411 | 57.4  | 91.1  | 56.8  | 89    |
| 384294 | 5.6   | 5.8   | 1.3   | 6.7   |
| 378253 | 66.8  | 49.2  | 32.7  | 43.4  |
| 272593 | 8.8   | 13.3  | 7.5   | 13.5  |
| 340692 | 8.1   | 8.3   | 8.8   | 9.6   |
| 403194 | 26.7  | 28.1  | 34.9  | 35    |
| 427040 | 9.2   | 11.2  | 6.2   | 11.7  |
| 380443 | 80.5  | 102.7 | 70.7  | 109.8 |
| 283347 | 67.2  | 55.1  | 78.1  | 55.4  |
| 403726 | 3.3   | 5     | 2.4   | 2.8   |
| 385118 | 7.6   | 10.5  | 9.1   | 14.6  |
| 347562 | 2.7   | 6.1   | 2.3   | 5.3   |
| 406673 | 5.5   | 7.2   | 5.2   | 6     |
| 355654 | 5.6   | 6.4   | 3.5   | 5.3   |
|        |       |       |       |       |
| 333713 | 50.2  | 70.4  | 46    | 68.7  |
| 398950 | 3.1   | 8.4   | 9.1   | 10.3  |
| 378474 |       | 2.7   |       | 3     |
| 378199 | 162.4 | 170.5 | 114.6 | 113.3 |
| 283577 | 32.5  | 40.4  | 43.6  | 39.9  |
| 394376 | 124.6 | 129.1 | 87    | 247.1 |

|        |       |       |       |       |
|--------|-------|-------|-------|-------|
| 283634 | 2.5   | 1.9   | 2.5   | 2.3   |
| 376483 | 17    | 17.3  | 14.8  | 15.9  |
| 384322 | 1.6   |       | 1.2   | 1.7   |
| 349679 | 44.8  | 67    | 53.4  | 76    |
| 427042 | 31.8  | 43.3  | 28.3  | 43    |
| 449861 | 1.9   |       | 1.7   |       |
| 447956 | 1.6   | 2     | 1.8   |       |
| 378828 | 12.4  | 13.7  | 11.8  | 15.6  |
| 381266 | 16.1  | 14.6  | 17.4  | 17.1  |
| 378562 | 9.5   | 10.3  | 7.2   | 9.4   |
| 369210 | 106.3 | 135.8 | 65    | 152.4 |
| 347741 | 32    | 22.5  | 18.2  | 24.1  |
| 346209 | 10.9  | 11.7  | 8.8   | 14.8  |
| 382687 | 7     | 9.7   | 5.9   | 9.6   |
| 346187 | 16.8  | 19.7  | 15.9  | 21.6  |
| 398949 | 19.7  | 25.5  | 19.5  | 19.9  |
| 346254 | 25.7  | 19.5  | 23.7  | 21.6  |
| 348709 | 6.3   | 7.5   | 9.6   | 9     |
| 340962 | 1.7   | 1.6   |       | 1.7   |
| 294084 | 2.2   | 2.2   | 1.4   | 2     |
| 375581 | 14.6  | 14    | 11.8  | 14.5  |
| 327309 | 32.8  | 31.8  | 28    | 28.7  |
| 378806 | 57.8  | 85.8  | 54.4  | 88.1  |
| 427595 |       | 3     | 2.9   | 3.2   |
| 403024 |       | 2.2   |       | 2.2   |
| 378383 | 2.5   | 5.2   | 2.7   | 7.8   |
| 349536 | 13    | 23.4  | 14.4  | 23.7  |
| 380458 | 30.4  | 45.4  | 27.7  | 41.5  |
| 402735 | 1.7   | 2.4   | 1.9   |       |
| 349688 | 26.8  | 37.3  | 20.6  | 33.4  |
| 378654 | 2.3   |       | 1.7   |       |
| 380364 | 28.2  | 41.2  | 25.7  | 38.7  |
| 307604 |       | 2.9   |       | 1.8   |
| 454135 | 2.7   | 1.5   |       | 2.1   |
| 429000 | 15.6  | 16.5  | 11.3  | 20.4  |
| 378718 | 3.1   | 2.4   | 1.5   | 3.3   |
| 378715 | 5.3   | 1.9   |       | 2.7   |
| 272153 | 39.9  | 75.6  | 57.7  | 95.6  |
| 449515 | 5.9   | 5.1   | 5.7   | 2.9   |
| 378297 | 7.5   | 7.2   | 6.7   | 7.8   |
| 384176 | 2.8   | 3.2   | 5.9   | 5.4   |
| 377422 | 9.5   | 19.5  | 52.7  | 35.5  |
| 377404 | 29.2  | 33.7  | 54.6  | 44.3  |
| 377674 | 46.5  | 43    | 36.7  | 41    |
| 377565 | 39.9  | 41.8  | 41.8  | 45.7  |
| 377489 | 31.3  | 37.1  | 35.7  | 39.6  |
| 431375 | 2.9   | 1.7   | 1.3   | 2.4   |
| 434233 | 28.9  | 32.5  | 36.8  | 37.8  |
| 433955 | 71.1  | 67.5  | 70.6  | 83.7  |
| 405685 | 15.2  | 14.6  | 14.1  | 11.5  |
| 422180 | 8.2   | 9.7   | 9.2   | 9.2   |
| 422177 | 152.2 | 165.9 | 174.3 | 181.4 |

|        |       |       |       |       |
|--------|-------|-------|-------|-------|
| 282923 | 76.7  | 79.4  | 84.5  | 79.3  |
| 472022 | 2.6   | 6.5   | 5.9   | 6     |
| 314684 | 48.3  | 59    | 70.2  | 66    |
| 311069 | 14.6  | 18.3  | 16.2  | 16    |
| 308954 | 103.9 | 118.4 | 105.2 | 116.4 |
| 350537 | 18.1  | 11    | 12.5  | 8.2   |
| 459567 | 31.6  | 33.4  | 26.2  | 36.3  |
| 459574 | 17.3  | 14.3  | 15    | 15.6  |
| 279480 | 250.9 | 254.7 | 243.2 | 254.4 |
| 279482 | 84.6  | 84.9  | 93.6  | 89.5  |
| 338984 | 37.9  | 35.2  | 37.6  | 39.5  |
| 342020 | 16.5  | 17.3  | 21.7  | 17.4  |
| 377589 | 19.1  | 17.5  | 20.4  | 17.3  |
| 448468 | 2.4   | 1.4   | 2.6   | 1.8   |
| 377710 | 16.4  | 19.7  | 18    | 19.4  |
| 334881 | 48.8  | 53.6  | 83.1  | 64.5  |
| 373047 | 15.8  | 15.1  | 12.3  | 12.9  |
| 378991 | 18.4  | 18.4  | 16.9  | 19.1  |
| 344421 | 29.9  | 27.6  | 28.5  | 32.6  |
| 283231 | 105.9 | 100.6 | 112.9 | 127.9 |
| 374236 | 71.3  | 62.2  | 59.1  | 63    |
| 311636 | 41.1  | 44.7  | 46.6  | 54    |
| 340512 | 102.9 | 105.6 | 114.6 | 99.4  |
| 433898 | 6     | 6.2   | 5.6   | 3     |
| 405706 | 8.8   | 7.5   | 8.9   | 8.8   |
| 434316 | 11.9  | 9.1   | 8.9   | 8.6   |
| 342140 | 22.7  | 18.1  | 18.7  | 19.3  |
| 308852 | 28.9  | 32.2  | 35.6  | 35.4  |
| 286211 | 24.5  | 14.9  | 16.3  | 18    |
| 285231 | 40.5  | 52.9  | 59.3  | 58    |
| 459444 | 15.2  | 12    | 15.1  | 16.6  |
| 377516 | 7.3   | 10.7  | 8     | 9.8   |
| 342872 | 22    | 19.9  | 19.5  | 23.3  |
| 342872 | 22    | 19.9  | 19.5  | 23.3  |
| 448034 | 10.8  | 6.5   | 13.7  | 10.4  |
| 285940 | 29.7  | 31.8  | 35.1  | 33.2  |
| 344246 | 42.4  | 63.8  | 73.4  | 71.7  |
| 434176 | 5.8   | 3.5   | 5.9   | 7     |
| 344233 | 23.8  | 36    | 44.3  | 47.5  |
| 451992 | 25.7  | 27.1  | 22.2  | 30.9  |
| 383956 | 3.1   | 1.9   | 2.6   | 2.4   |
| 383918 | 14.6  | 10.4  | 14.6  | 11    |
| 383851 | 20.8  | 12.6  | 15.7  | 10.5  |
| 452025 |       | 1.4   |       |       |
| 386978 | 9.4   | 8.2   | 7.9   | 6.6   |
| 387297 | 25.1  | 23.2  | 25.7  | 21.8  |
| 387264 | 2.3   | 2     | 1.8   |       |
| 387233 | 40.9  | 38.5  | 43.6  | 29.8  |
| 387190 | 6.6   | 7.5   | 7.7   | 3.6   |
| 387160 | 40.4  | 34.7  | 37.4  | 27.8  |
| 385343 | 17.7  | 17.8  | 19.3  | 11.6  |
| 450247 |       |       | 1.7   |       |



|        |      |      |      |      |
|--------|------|------|------|------|
| 450307 | 1.8  |      | 1.8  |      |
| 393165 | 17.6 | 15.3 | 14.9 | 15.9 |
| 360148 | 60.4 | 48.3 | 52.3 | 49.6 |
| 360142 | 10.1 | 8.6  | 5.9  | 8.9  |
| 354721 | 8.1  | 8.3  | 7.9  | 6.3  |
| 354708 | 51.1 | 50.6 | 51.2 | 55.8 |
| 353915 | 19.8 | 21.1 | 18.4 | 18   |
| 358646 | 6.7  | 5.3  | 2.6  | 3.2  |
| 358627 | 24.9 | 23.5 | 24.5 | 24.1 |
| 359981 | 11.5 | 13.1 | 17.2 | 13.7 |
| 454070 | 1.9  | 2    | 1.7  | 1.6  |
| 454301 | 11.7 | 7.4  | 6.9  | 9.3  |
| 454224 | 27.2 | 17.8 | 21.3 | 26.9 |
| 454106 | 19.2 | 14.9 | 18.5 | 20.7 |
| 454185 | 21.8 | 19.1 | 14.9 | 24   |
| 454212 | 17.5 | 12.4 | 14.9 | 19.7 |
| 377171 | 17.9 | 14.4 | 15.1 | 13.6 |
| 377090 | 12.6 | 9.6  | 8.7  | 12   |
| 369498 | 44.8 | 30.5 | 35.5 | 31.7 |
| 372236 | 20.9 | 17.7 | 12.1 | 21.6 |
| 372137 | 39   | 39.4 | 41   | 44.1 |
| 428498 | 2.2  | 1.6  | 2.1  |      |
|        |      |      |      |      |
|        |      |      |      |      |
| 428390 | 20.4 | 20.5 | 20   | 22   |
| 430587 | 6.4  | 5.9  | 6.3  | 7.6  |
|        |      |      |      |      |
| 434637 | 5.8  | 2.6  | 3.4  | 4.9  |
| 434555 | 27.3 | 23.3 | 23.6 | 23.3 |
| 434518 | 22.6 | 20.6 | 19.5 | 22.1 |
| 434406 | 6.3  | 6.2  | 8.3  | 7.2  |
| 405907 | 18.7 | 19.9 | 17.7 | 22.1 |
| 405613 | 25.1 | 17.4 | 20.8 | 19.3 |
| 405581 | 61.1 | 49.8 | 41.9 | 44.9 |
| 447826 | 5.8  | 2.9  | 6.5  | 5.2  |
| 447908 | 15.2 | 11.3 | 14.7 | 14.6 |
| 405475 | 46.8 | 46.7 | 55.3 | 57.5 |
| 448462 | 7    | 7.4  | 8.8  | 9.8  |
| 448462 | 7    | 7.4  | 8.8  | 9.8  |
| 399161 | 27.8 | 20.5 | 18.7 | 26.3 |
| 418282 | 1.4  | 2.3  | 2.6  | 1.5  |
| 418212 | 3.1  | 2.8  | 3.4  | 1.6  |
| 416379 | 9.9  | 8.8  | 10   | 8.7  |
| 416122 | 17.9 | 16.6 | 18.9 | 16.5 |
| 446615 | 53.5 | 47.8 | 49.6 | 49.7 |
| 415641 | 2.8  | 2.7  | 3.1  | 2.4  |
| 415484 | 2.3  |      | 3.3  | 5.2  |
| 415476 | 48.3 | 53.5 | 59.2 | 54.7 |
| 415466 | 8.4  | 10.4 | 9.6  | 8.9  |
| 323469 | 9.7  | 9.2  | 11.3 | 9.8  |
| 323364 | 29.4 | 25   | 27.6 | 25.8 |
| 323299 | 48.6 | 44.6 | 58.3 | 45.1 |

|        |       |       |       |       |
|--------|-------|-------|-------|-------|
| 323185 | 7.9   | 9.1   | 9.5   | 9.4   |
| 334263 | 185.3 | 154.2 | 153.3 | 159.6 |
| 282838 | 48.2  | 65.1  | 52.1  | 58    |
| 474951 | 133.5 | 122.2 | 131.7 | 136.6 |
| 336123 | 34.8  | 32.7  | 41.3  | 62.6  |
| 474774 | 309.3 | 320   | 332.8 | 354.1 |
| 332282 |       | 1.3   | 2.5   |       |
| 313790 | 59.6  | 47.4  | 50.7  | 49.3  |
| 305326 | 23    | 18.9  | 22.9  | 20.7  |
| 304936 | 26.9  | 21.7  | 29.8  | 25.7  |
| 305010 | 70.5  | 62.8  | 72    | 59.3  |
| 305016 | 29.8  | 33.6  | 31.6  | 29    |
| 305083 | 20.8  | 22.9  | 24    | 21    |
| 314152 | 41.2  | 24    | 23.1  | 31.7  |
| 305837 | 17    | 14.5  | 14.1  | 13.7  |
| 309583 | 38.1  | 32.8  | 35.6  | 37.1  |
| 306322 | 14.7  | 13.8  | 15.6  | 12.3  |
| 305913 | 35.1  | 33.5  | 47.1  | 35.1  |
| 306316 | 46.3  | 40.4  | 45.2  | 48.3  |
| 344477 | 12.4  | 11    | 11.8  | 12.8  |
| 344647 | 14.6  | 11.9  | 12.8  | 13.7  |
| 344294 | 76.1  | 64    | 63    | 59.7  |
| 344161 | 11.5  | 13.4  | 12.4  | 13    |
| 258770 | 18.1  | 9.1   | 54.3  | 11.2  |
| 475442 | 22    | 28.9  | 29.7  | 29.9  |
| 347413 | 42.3  | 35.6  | 41.8  | 45    |
| 459035 | 43.8  | 42.7  | 34.8  | 47.8  |
| 475256 | 159.3 | 169.8 | 170.4 | 171.2 |
| 475443 | 108.1 | 114.3 | 147.3 | 125.2 |
| 459502 | 10.9  | 7.5   | 10.6  | 10.8  |
| 281359 | 69.9  | 67.9  | 59.7  | 68.8  |
| 340432 | 23.6  | 20.6  | 14    | 16.3  |
| 340576 | 11.6  | 8.5   | 8.6   | 8.7   |
| 280232 | 116.4 | 60.3  | 56.2  | 75.1  |
| 340618 | 26.2  | 22.8  | 22.7  | 24    |
| 340619 | 45.7  | 38.5  | 27.6  | 42.6  |
| 414832 | 1.5   |       | 1.5   | 1.9   |
| 418522 |       |       | 1.8   |       |
| 404354 | 8.9   | 17    | 11    | 14.4  |
| 441415 | 6.5   | 6.6   | 7     | 4.9   |
| 340812 | 15.5  | 15.9  | 19.7  | 16.7  |
| 454388 | 2.1   |       | 1.6   | 2.3   |
| 416663 | 3     | 2.4   | 1.5   | 4.4   |
| 365353 | 1.6   |       |       |       |
| 434437 | 13.2  | 10.7  | 11.4  | 14    |
| 415306 | 2.1   |       |       |       |
| 454527 | 1.8   | 2.2   | 1.8   | 1.8   |
| 386866 | 7.4   | 3.2   | 1.6   | 2.4   |
| 427463 |       | 1.9   |       | 2.7   |
| 387367 | 5.4   | 2.5   | 3.1   | 5.4   |
| 279691 | 16.7  | 15.6  | 12.8  | 72.8  |
| 340620 | 19.2  | 20    | 27    | 21.7  |

|        |       |       |      |       |
|--------|-------|-------|------|-------|
| 336384 | 45.2  | 44.9  | 40.3 | 58.4  |
| 473997 | 31.5  | 25.7  | 34.9 | 39.4  |
| 313780 | 67.2  | 44.7  | 40.8 | 40    |
| 474320 | 18.3  | 15.1  | 20.2 | 23.5  |
|        |       |       |      |       |
| 380027 | 6.5   | 2.4   | 2.4  | 1.9   |
|        |       |       |      |       |
| 418184 |       | 1.6   |      | 1.5   |
| 453752 | 13.6  | 11.5  | 8.8  | 12.1  |
|        |       |       |      |       |
|        |       |       |      |       |
| 343065 | 10.6  | 8.3   | 7.9  | 11.8  |
| 450250 | 6.6   | 6.6   | 6.8  | 13.4  |
| 450309 | 1.6   | 2.5   | 3    | 3.1   |
| 416513 | 2.9   | 1.9   | 5.8  | 1.4   |
| 279739 | 10.6  | 15    | 11.1 | 33    |
|        |       |       |      |       |
| 418400 | 1.4   |       |      | 1.5   |
| 451640 | 1.9   | 1.5   | 1.6  |       |
|        |       |       |      |       |
| 404357 | 5.3   | 3.1   | 6.2  | 5.8   |
| 384036 | 3.2   | 2.2   | 2    | 2.3   |
| 472629 | 6     | 3     | 2.8  | 5.9   |
| 418443 | 5.3   | 2.9   | 5.8  | 2.7   |
| 389617 | 50.9  | 32.3  | 16   | 58.3  |
| 384332 | 10.3  | 7.4   | 1.6  | 7.8   |
| 384258 | 6.1   | 7.8   | 3.1  | 7.3   |
| 384416 | 10    | 7.3   | 3    | 11.8  |
| 384557 | 11.4  | 8     | 7.8  | 14.5  |
| 452072 | 204.3 | 154.9 | 84.5 | 179   |
| 452132 | 144.9 | 105.9 | 49.7 | 106   |
| 452044 | 125.3 | 99.8  | 59.9 | 110.9 |
| 452069 | 87.8  | 62.4  | 41.8 | 84.3  |
| 386181 | 2.2   | 2     | 1.5  | 5.7   |
| 449914 | 82    | 62.1  | 32.8 | 69.2  |
| 449960 | 28.1  | 12.3  | 14   | 18.8  |
| 389558 | 72.8  | 41.3  | 17.1 | 70    |
| 389523 | 63.4  | 38.9  | 12.7 | 56.6  |
| 389509 | 69    | 40.2  | 21.9 | 74.5  |
| 389464 | 68.3  | 41.9  | 19.2 | 66.9  |
| 389403 | 63.5  | 40.2  | 17.3 | 63.5  |
| 389387 | 90.6  | 52.1  | 29.5 | 95.7  |
| 389448 | 74.1  | 44.5  | 17.5 | 72.8  |
| 389578 | 58.2  | 32.7  | 15.5 | 53    |
| 389635 | 34.4  | 20.8  | 12.3 | 35.8  |
| 389751 | 7.2   | 1.3   | 1.9  | 7     |
| 389735 | 9.7   | 3     | 1.8  | 8.5   |
| 389694 | 19.5  | 13.4  | 5.5  | 18.7  |
| 389674 | 22.2  | 14.7  | 7.6  | 22    |
| 389322 | 59    | 32.8  | 18   | 52.7  |
| 389244 | 58.6  | 32.1  | 13.3 | 52.2  |
| 389240 | 68.3  | 40.4  | 19.9 | 68.7  |

|        |       |       |       |       |
|--------|-------|-------|-------|-------|
| 389186 | 64.2  | 38.9  | 14.9  | 58.7  |
| 389182 | 88.2  | 48.4  | 27.5  | 92.7  |
| 391542 | 3     | 2.3   | 1.5   | 2.1   |
| 393211 | 19.2  | 15.5  | 16.1  | 15.7  |
| 393208 | 35.4  | 28    | 23.5  | 29.8  |
| 353210 | 5.4   | 3.2   | 6     | 3.1   |
| 353082 | 2.7   | 2.5   | 4.8   | 2.9   |
| 352800 | 5     | 2.9   | 2.8   | 2.4   |
| 375837 | 15.5  | 11.6  | 11.9  | 12.8  |
| 369596 | 82.3  | 62.6  | 58.6  | 66.5  |
| 369595 | 38.8  | 24.3  | 29.9  | 33.4  |
| 428396 | 71.6  | 57.2  | 37.6  | 66.8  |
| 426667 | 32    | 24.2  | 29.8  | 29.7  |
| 426740 | 54.3  | 46.4  | 50.8  | 47.5  |
| 405941 | 107   | 129.3 | 103.7 | 171.9 |
| 406110 | 67.6  | 46.8  | 28.4  | 61.3  |
| 446696 | 16.1  | 17.5  | 13.1  | 26.5  |
| 421880 | 27.1  | 28.7  | 22    | 32    |
| 446523 | 63.4  | 34.2  | 36.5  | 56.3  |
| 352645 | 9.3   | 11.1  | 9     | 5.7   |
| 283893 | 142.6 | 96.4  | 96    | 105.6 |
| 283972 | 19.9  | 13.7  | 15.4  | 16    |
| 283987 | 66.3  | 42.4  | 37.8  | 53.5  |
| 283989 | 110.9 | 87.3  | 82.1  | 93.3  |
| 334536 | 179.1 | 128.3 | 124.7 | 162.7 |
| 334525 | 54.2  | 47    | 43.7  | 49.1  |
| 283892 | 46.9  | 36.1  | 31.6  | 38.9  |
| 283801 | 93    | 64.4  | 70.2  | 79.6  |
| 283802 | 163.2 | 135.5 | 134.9 | 161.1 |
| 283879 | 38    | 25.2  | 28.2  | 29.3  |
| 283787 | 16.6  | 11.9  | 11.2  | 12.1  |
| 303112 | 2.2   | 2.2   |       | 1.9   |
| 303153 | 5.3   | 1.7   | 1.7   | 5.6   |
| 470480 | 25.9  | 21.1  | 21.1  | 26.7  |
| 470634 | 97.1  | 72.3  | 38.2  | 92.1  |
| 470441 | 20.9  | 26    | 10.6  | 40.6  |
| 470427 | 34.5  | 51.7  | 15.6  | 67.6  |
| 319045 | 86    | 47.7  | 27.1  | 63.6  |
| 298678 | 7.6   | 6.8   | 2     | 7.1   |
| 298586 | 5     | 1.9   |       | 7.2   |
| 298362 | 52.3  | 39.5  | 22.4  | 60.3  |
| 298415 | 12.4  | 7.6   | 5.7   | 11.6  |
| 298440 | 51.4  | 37.3  | 21.5  | 51    |
| 298505 | 13.6  | 11.9  | 5.5   | 15.2  |
| 350514 | 14.3  | 14    | 11.6  | 5.7   |
| 458257 | 59.9  | 37.2  | 22.6  | 52.1  |
| 458263 | 114.1 | 66.5  | 25.5  | 75.1  |
| 350435 | 11.9  | 9.7   | 10    | 5.7   |
| 350491 | 9.8   | 11.7  | 5.9   | 2.5   |
| 350543 | 11.7  | 13.8  | 5.8   | 5.5   |
| 342987 | 119   | 139.4 | 113   | 187.4 |
| 343132 | 96.3  | 57.6  | 31.2  | 71    |

|        |       |       |       |       |
|--------|-------|-------|-------|-------|
| 475472 | 13.7  | 12.2  | 9.6   | 17.2  |
| 475323 | 63.5  | 85.2  | 54.7  | 147.6 |
| 462362 | 59.8  | 61.3  | 35    | 76.6  |
| 337967 | 107   | 96.1  | 62    | 113.4 |
| 475087 | 203.9 | 246.1 | 163.1 | 426.4 |
| 470289 | 16    | 20.7  | 11.7  | 22    |
| 406095 | 65.2  | 44.9  | 26.4  | 61.5  |
| 458103 | 10.2  | 10.1  | 5.7   | 11.1  |
| 316343 | 44.2  | 39.5  | 23.9  | 45.6  |
| 407269 | 12    | 6.6   | 5.1   | 9.6   |
| 432473 | 25    | 15    | 14.8  | 16.3  |
| 303082 | 4.8   | 2.3   | 1.4   | 2.3   |
| 334542 | 12.9  | 10.5  | 6.5   | 14.2  |
| 450907 | 40.2  | 29.8  | 21.7  | 33.7  |
| 475331 | 2.8   | 2.4   | 1.8   | 6.5   |
| 452331 | 38.1  | 31.1  | 19.8  | 32.2  |
| 303055 | 2.5   | 2.1   |       | 2.3   |
| 425894 | 59.3  | 46.5  | 113.9 | 43.4  |
| 389236 | 7.4   | 2.1   | 1.6   | 9.4   |
| 350375 | 36.3  | 18.9  | 22    | 16.7  |
| 469217 | 11.6  | 6.6   | 6.3   | 10.1  |
| 303013 |       |       |       | 2.3   |
| 449880 | 16.9  | 16.1  | 8.9   | 20.1  |
| 458396 | 15.9  | 10.3  | 28.1  | 11.4  |
| 398064 | 143.8 | 138.5 | 56.7  | 178.8 |
| 316727 | 18.5  | 20.6  | 21.7  | 16.9  |
| 474148 | 18.3  | 18.2  | 18.5  | 24.3  |
| 283084 | 26.6  | 26.8  | 23.7  | 24.3  |
| 398072 | 81.6  | 66.6  | 31.6  | 85.1  |
| 450840 | 24.8  | 20.6  | 15.5  | 21.5  |
| 450626 | 23.3  | 18    | 12.7  | 19.5  |
| 432681 | 19    | 13.9  | 10.1  | 19.9  |
| 460385 | 18.5  | 15.8  | 12.9  | 17.9  |
| 460385 | 18.5  | 15.8  | 12.9  | 17.9  |
| 384657 | 2.8   | 1.3   |       | 1.6   |
| 451991 | 9.6   | 6.8   | 5.1   | 12.1  |
| 389134 | 8.3   | 3.4   |       | 8.2   |
| 451100 | 29.7  | 24.9  | 17.5  | 26.1  |
| 454127 | 21.9  | 19.5  | 20.2  | 20.3  |
| 428025 | 73    | 59.3  | 47.6  | 66.5  |
| 449943 | 6.5   |       | 6.7   | 8.3   |
| 298799 | 2.1   | 1.9   |       |       |
| 452246 | 63.7  | 47.1  | 40.7  | 54    |
| 284244 | 43.3  | 35.1  | 36.6  | 32.9  |
| 450586 | 28    | 17.8  | 14.5  | 23.9  |
| 451966 | 31.7  | 25.2  | 19.4  | 31.2  |
| 451592 | 37.2  | 28    | 20.2  | 29.1  |
| 312622 | 38.6  | 33.3  | 38.3  | 37.1  |
| 318906 | 2.8   | 8.2   | 6.6   | 12.5  |
| 457265 | 16.4  | 13.5  | 12.4  | 18    |
| 333849 | 30.4  | 21    | 26.1  | 27.6  |
| 424524 | 69.9  | 52.6  | 35.7  | 63    |

|        |       |       |       |       |
|--------|-------|-------|-------|-------|
| 289750 | 6.6   | 5     | 3.1   | 7.2   |
| 316196 | 8.9   | 12.2  | 10    | 13.1  |
| 395171 | 93.2  | 51.7  | 47.9  | 68.7  |
| 424798 | 16.3  | 17.4  | 13.1  | 14.3  |
| 400121 | 96.3  | 69.2  | 57.2  | 82.7  |
| 427719 | 43.6  | 53.5  | 43.5  | 62.6  |
| 393161 | 8.7   | 7.8   | 9.1   | 12.1  |
| 352955 |       | 1.9   | 2.2   | 1.8   |
| 428103 | 46.9  | 33.8  | 24.9  | 39.3  |
| 451306 | 28.2  | 18.9  | 18.6  | 24.9  |
| 377708 | 136.6 | 100.2 | 59.9  | 120.8 |
| 372631 | 29.6  | 20.4  | 19    | 23.5  |
| 298868 | 1.6   |       |       | 2.3   |
| 334376 | 40.5  | 35.4  | 44.9  | 43.2  |
| 432386 | 21.6  | 16    | 12.7  | 19    |
| 343332 | 13.3  | 11.2  | 8.2   | 14.3  |
| 451709 | 50.2  | 36.2  | 32.6  | 40.4  |
| 399590 | 107.8 | 91.7  | 61    | 119.1 |
| 395251 | 86.5  | 54.6  | 43.5  | 86.4  |
| 432402 | 6.8   | 5.5   | 3.3   | 5.7   |
| 382316 | 1.3   | 2     | 2     |       |
| 425400 | 70.6  | 50.1  | 32.1  | 54.7  |
| 427735 | 262.9 | 257.6 | 148.1 | 263.6 |
| 282986 | 40    | 70.2  | 40.2  | 29.2  |
| 399693 | 276.2 | 197.6 | 108.4 | 230.4 |
| 399885 | 70.4  | 57.4  | 57.6  | 74.4  |
| 425942 | 21.6  | 11.1  | 11.6  | 15.8  |
| 450553 | 22.3  | 20.6  | 15.6  | 27.8  |
| 372497 | 48.8  | 35.6  | 27.3  | 36.9  |
| 450399 | 20.3  | 16.8  | 12.5  | 15.1  |
| 399786 | 268.1 | 177.8 | 98.3  | 207.5 |
| 450088 | 14.9  | 12.7  | 9.9   | 13.9  |
| 427770 | 71.3  | 53.4  | 32.8  | 65.2  |
| 384491 | 2.2   | 2.5   | 1.5   | 2.9   |
| 449884 | 5.2   | 5.9   | 2     | 6.7   |
| 406198 | 6     | 1.3   |       | 1.9   |
| 395191 | 17.2  | 14.1  | 6.5   | 20.6  |
| 449850 | 16.4  | 11.9  | 10.5  | 14.4  |
| 282987 | 1.6   |       | 2.8   | 1.9   |
| 376030 | 16.3  | 13.5  | 10.4  | 21.8  |
| 406213 | 13.3  | 7.1   | 3.3   | 10.6  |
| 450281 | 14.8  | 14.1  | 8     | 14.2  |
| 426201 | 50.2  | 35.5  | 23.4  | 36    |
| 399958 | 80    | 58.7  | 40.7  | 64.6  |
| 450222 | 14.8  | 10.6  | 11.6  | 13.4  |
| 433872 | 2.1   |       |       | 2.1   |
| 333860 | 90.5  | 67.8  | 66.4  | 76.9  |
| 372543 | 143.9 | 96.1  | 80.8  | 111.1 |
| 451270 | 82.2  | 66.7  | 34.9  | 76.4  |
| 431118 | 18.7  | 12.9  | 13.4  | 17.2  |
| 369528 | 22.7  | 20.3  | 21.8  | 19    |
| 425833 | 21.3  | 12.1  | 11.5  | 15.3  |

|        |      |       |       |       |
|--------|------|-------|-------|-------|
| 389455 | 8.9  | 4.7   | 5.1   | 11.4  |
| 380438 | 21   | 21.4  | 18.9  | 17.5  |
| 380355 | 30.3 | 32    | 31    | 30.7  |
| 380349 | 77.9 | 76.1  | 63.6  | 69.6  |
|        |      |       |       |       |
| 380174 | 1.4  | 1.5   |       | 1.7   |
|        |      |       |       |       |
| 380772 | 40.2 | 35.4  | 36.2  | 34    |
| 380712 | 34.7 | 31.5  | 32.2  | 27    |
| 380680 | 79.7 | 85.5  | 99.2  | 83.5  |
| 380142 | 5.4  | 2.4   |       | 2.5   |
| 379289 | 76   | 78.8  | 79.9  | 82    |
| 379298 | 52.2 | 50.2  | 51.1  | 51.9  |
|        |      |       |       |       |
| 382919 | 15.2 | 14.1  | 16.3  | 17.4  |
| 382918 | 17.7 | 23.1  | 25    | 27.5  |
| 382886 | 2    | 5.8   |       | 2.9   |
| 382798 | 14.1 | 16.2  | 18.5  | 14.8  |
| 382745 | 27.8 | 31.9  | 34.5  | 26.9  |
| 382690 | 19.8 | 19.8  | 22.9  | 19.3  |
| 382022 |      |       |       | 1.3   |
| 355482 | 54.4 | 52.4  | 53.4  | 54.4  |
| 354308 | 29.6 | 28    | 32.7  | 29.3  |
| 352935 | 25.7 | 11.3  | 26.9  | 12.7  |
| 352902 | 5.5  | 5     | 5.9   | 5.7   |
| 352885 | 19.9 | 19    | 21.3  | 22    |
| 453985 | 84.4 | 102.1 | 122.1 | 110.7 |
|        |      |       |       |       |
| 439917 | 5.9  | 3     | 6.8   | 2.7   |
| 427714 | 76   | 102.2 | 126.5 | 100.5 |
| 435288 | 54.6 | 56.8  | 67.4  | 59    |
| 435524 | 19.7 | 21.8  | 23.4  | 20.7  |
| 435491 | 10.9 | 9.9   | 12.1  | 9.9   |
| 435437 | 35.3 | 43.6  | 49.8  | 43.3  |
| 435379 | 30   | 39.3  | 38.1  | 29.2  |
| 440063 | 2.5  | 2.3   | 2.8   | 2.3   |
| 438783 | 19.6 | 20.9  | 17.5  | 21.5  |
| 438778 | 6.1  | 6.3   | 5.6   | 3.2   |
| 440016 | 17.2 | 16.8  | 17.7  | 18.2  |
| 440028 |      |       | 3     | 3     |
| 440331 | 10.3 | 7.4   | 7.1   | 6.4   |
| 438642 | 2.3  | 2.5   | 1.6   | 1.8   |
| 440160 | 20.4 | 19.3  | 22.2  | 18.9  |
| 434270 | 22.7 | 23.5  | 19.3  | 21.9  |
| 434169 | 10.9 | 15.1  | 16.6  | 19.5  |
| 434155 | 11.2 | 13    | 10.8  | 14.6  |
| 434118 | 24.8 | 29.5  | 24.4  | 22.6  |
| 434031 | 4.1  |       |       | 2.7   |
| 434383 | 5.9  | 7.3   | 6.5   | 5.5   |
| 433949 | 6.5  | 5.9   | 3.5   | 3.4   |
| 433869 | 2.4  | 1.7   | 1.8   | 2     |
| 433869 | 2.4  | 1.7   | 1.8   | 2     |

|        |       |       |       |       |
|--------|-------|-------|-------|-------|
| 433949 | 6.5   | 5.9   | 3.5   | 3.4   |
| 406378 | 14.7  | 12.8  | 14.5  | 15.8  |
| 406377 | 15.9  | 14.6  | 16.2  | 17.9  |
| 407170 | 23.8  | 20.4  | 22.3  | 24.2  |
| 407180 | 229.1 | 260.7 | 236.2 | 288.2 |
| 406779 | 12.5  | 12.6  | 18.8  | 13.4  |
| 407311 | 86.7  | 81.6  | 71    | 81.6  |
| 407304 | 17    | 15.5  | 12.4  | 18.1  |
| 400485 | 29.5  | 31.5  | 22.7  | 29.9  |
| 466288 | 7.4   | 9.6   | 5.4   | 8.3   |
| 466354 | 21.1  | 21.7  | 21    | 20.8  |
| 466357 | 18.8  | 23.9  | 19.1  | 23.2  |
| 321508 | 2.4   | 6.6   | 7.4   | 7.3   |
| 321651 | 6.2   | 6.7   | 7.6   | 6.4   |
| 321647 | 18.7  | 14.2  | 12.2  | 12.7  |
| 321576 | 2.6   |       | 3.1   |       |
| 463897 | 9.2   | 5     | 8.5   | 9.4   |
| 327782 | 10.6  | 9.1   | 8.7   | 10.3  |
|        |       |       |       |       |
| 328342 | 1.5   |       |       |       |
| 465169 | 6.2   | 7.5   | 5.8   | 6.2   |
|        |       |       |       |       |
| 327719 | 12.4  | 16.7  | 13.4  | 18.8  |
| 327666 | 23.6  | 25.8  | 25    | 27.9  |
|        |       |       |       |       |
| 469795 | 29.2  | 35.4  | 32.8  | 32.7  |
| 469796 | 15.9  | 14.6  | 15.9  | 15.9  |
| 469935 | 6.5   | 3     | 6.7   | 3.4   |
| 316704 | 25.9  | 24.3  | 20.4  | 17.8  |
| 316694 | 17    | 11.9  | 13.6  | 10    |
| 316603 | 30.8  | 34.2  | 31    | 32    |
| 473323 | 2.7   | 5.2   | 2     | 5.5   |
| 316556 | 11.4  | 11.6  | 6     | 7.7   |
| 473163 | 2.7   | 2.6   | 1.5   | 2.7   |
| 475158 | 147.2 | 205.2 | 239.8 | 248.6 |
| 348449 | 12    | 13.5  | 13.2  | 21.7  |
| 459442 | 17.5  | 15.5  | 15.6  | 17.9  |
| 463072 | 20.1  | 22.8  | 22.1  | 26.3  |
| 463113 | 35.8  | 47.2  | 36.7  | 44.7  |
| 461241 | 5.3   | 3     | 2.7   | 2.3   |
| 435637 | 18    | 16    | 13.2  | 13.6  |
| 380238 | 16.8  | 20.5  | 21.4  | 18.2  |
| 380221 | 13    | 8.7   | 13    | 15.6  |
| 450131 | 6.8   | 8.5   | 10.9  | 8.6   |
| 353140 | 1.8   | 1.3   |       | 1.6   |
| 427802 | 175.7 | 174.2 | 191   | 188.1 |
| 406879 | 8.2   | 5.9   | 7.5   | 6.8   |
| 433768 |       | 1.8   |       | 2.2   |
| 466202 | 6.8   | 7     | 7.3   | 9.1   |
| 439710 | 1.4   | 1.8   |       | 2     |
| 315400 | 63    | 60.3  | 66.8  | 51.3  |
| 379180 | 2.9   | 9.3   | 6.8   | 7.2   |



|        |       |       |       |       |
|--------|-------|-------|-------|-------|
| 292333 | 9.2   | 13.7  | 8     | 16    |
| 292222 | 6     | 6.2   | 3.2   | 3.5   |
| 355310 | 9.8   | 7.8   | 14.9  | 11.3  |
| 341107 | 18.2  | 17.7  | 21.8  | 20.8  |
| 437998 | 8.3   | 1.6   | 4.8   | 3     |
| 397796 | 39.6  | 33.5  | 53.9  | 35.7  |
| 428687 | 7     | 3.3   | 9.7   | 5.4   |
| 382585 | 3.5   | 2.5   | 2.2   | 2.9   |
| 470066 | 2.2   |       | 2.1   | 3.3   |
| 380118 | 9     | 9.6   | 6.8   | 8.1   |
| 426599 | 20.4  | 20.5  | 21.6  | 19.6  |
| 427312 | 20.5  | 17.8  | 18.3  | 19.8  |
| 263137 | 121.2 | 106.6 | 125.9 | 114   |
| 346666 | 8.7   | 12.5  | 10.4  | 9.1   |
|        |       |       |       |       |
| 397723 | 48.4  | 46.7  | 50    | 44.3  |
| 428162 | 20.4  | 15.3  | 19.6  | 28.5  |
| 435069 | 8.1   | 5.8   | 2.8   | 5.8   |
| 435069 | 8.1   | 5.8   | 2.8   | 5.8   |
| 376997 | 7.7   | 8.3   | 10.9  | 6.7   |
| 427994 | 47.1  | 44.9  | 37.8  | 47.4  |
| 434513 | 15.4  | 15.6  | 18.3  | 18.1  |
| 352739 | 3.1   |       | 1.5   | 5.3   |
| 427778 | 246.1 | 296.2 | 243.8 | 259   |
| 380623 | 7.9   | 3.1   | 8.7   | 6.6   |
|        |       |       |       |       |
| 403105 | 7.1   | 8.6   | 6.1   | 8.8   |
| 384355 | 12    | 11    | 13.7  | 11    |
| 322515 | 3.1   | 2.4   | 2.5   | 2.3   |
| 435357 | 3.4   | 2.4   | 3     | 1.7   |
| 434008 | 4.6   | 8.5   | 7.4   | 7     |
| 263422 | 20.2  | 17.7  | 23.4  | 21.2  |
| 350880 | 1.6   | 1.7   |       |       |
| 384525 | 2.6   | 1.8   | 2.1   | 2     |
| 384479 | 5.3   | 2.4   | 2.8   | 2.9   |
| 398979 | 62.3  | 50    | 67.5  | 51.9  |
| 398701 | 61.1  | 64.4  | 70.8  | 69.4  |
| 393120 | 48.8  | 45.6  | 51.5  | 40.3  |
| 353539 | 8.6   | 9.1   | 9     | 8.2   |
| 358162 | 1.4   | 2.2   | 2.7   | 2.2   |
| 435468 | 9.9   | 10.5  | 16.3  | 9.1   |
| 439136 | 71.1  | 65.8  | 62.6  | 75.4  |
| 439003 | 30.3  | 37.2  | 51.2  | 43.4  |
| 406282 | 27.1  | 32.6  | 50.3  | 33.7  |
| 399087 | 206.2 | 196.3 | 198.1 | 160.5 |
| 409137 | 13.4  | 12.2  | 15.7  | 9.9   |
| 410258 | 12.8  | 10.2  | 20.7  | 12    |
| 288570 | 36.6  | 23.2  | 30    | 22.8  |
| 288588 | 142.6 | 92    | 181.7 | 77.8  |
| 334634 | 136.6 | 112.5 | 130.6 | 130.4 |
| 284295 | 18.8  | 20    | 29.8  | 22.4  |
| 284309 | 50.8  | 46.7  | 56.2  | 43.8  |

|        |       |       |       |       |
|--------|-------|-------|-------|-------|
| 327975 | 5.5   | 1.8   | 3.3   |       |
| 465383 | 36.4  | 48.4  | 52.2  | 50.5  |
| 470291 | 11.2  | 12.4  | 14.4  | 12.4  |
| 470392 | 9.7   | 7.2   | 5.9   | 3     |
| 469478 | 2.7   | 2.6   | 3.1   | 1.7   |
| 471268 | 6.1   | 7.1   | 9.1   | 5.8   |
| 270084 | 12.8  | 8.6   | 9.1   | 9.7   |
| 270077 | 17.7  | 13.4  | 19.9  | 12.3  |
| 270001 | 17    | 15.1  | 17.1  | 13.3  |
| 269996 | 53.1  | 40.9  | 46.4  | 39.3  |
| 463496 | 20    | 12.5  | 13.7  | 14.5  |
| 269930 | 6.2   | 5.5   | 7.2   | 2.7   |
| 396001 | 18.5  | 17.7  | 21.8  | 17.9  |
| 393124 | 20.7  | 15.9  | 22.5  | 16.1  |
| 436517 | 22.1  | 22.7  | 21    | 23    |
| 439138 | 11.2  | 11.2  | 8.6   | 9.2   |
| 248010 | 28.5  | 23    | 32.8  | 25    |
| 314919 | 20    | 25    | 36.5  | 29.8  |
| 471257 | 3.3   | 2.6   | 2.8   | 2.2   |
| 399016 | 33.6  | 31.6  | 35.6  | 26.2  |
|        |       |       |       |       |
| 379985 | 2.7   | 2.6   | 2.6   | 3.1   |
| 268337 | 10.6  | 10.7  | 10.4  | 9.4   |
| 311801 | 30.5  | 37.7  | 48.3  | 39    |
| 457862 | 8     | 11.8  | 14.2  | 13.9  |
| 333761 | 318.8 | 294.7 | 472.5 | 323.8 |
| 398792 | 6.2   | 5.4   | 6.2   | 5.2   |
| 266470 | 8     | 3.4   | 9.8   | 5.5   |
| 427075 | 6     | 5.1   | 11.4  | 5.7   |
| 266515 | 14.5  | 13.3  | 14.5  | 16    |
| 427081 | 319.6 | 246.3 | 295.4 | 264.3 |
| 315050 | 30.8  | 20.8  | 26.1  | 23.5  |
| 427148 | 112.7 | 85.7  | 107.3 | 89    |
| 289278 | 21.6  | 19.4  | 11.6  | 9     |
| 270123 | 15.7  | 15    | 11.9  | 15.7  |
| 379064 | 35.7  | 49.2  | 23.1  | 57.6  |
| 450367 | 6.9   | 5.9   | 2.3   | 5.8   |
| 396563 | 17    | 20.3  | 17    | 17    |
| 391748 | 14.3  | 18.1  | 16.1  | 19.5  |
| 391741 | 31.7  | 31.5  | 27.2  | 33.3  |
| 391782 | 62    | 72.7  | 56    | 50.5  |
| 391783 | 16.2  | 19.7  | 18.6  | 16.7  |
| 393049 | 31.1  | 40.1  | 28.7  | 32.5  |
| 393015 | 18    | 19.9  | 18.8  | 19    |
| 391363 | 1.6   | 1.5   |       | 1.8   |
| 457602 | 8.5   | 11.7  | 7.8   | 14.1  |
| 457753 | 38.6  | 55.3  | 36.6  | 67.2  |
| 457159 | 18.9  | 19.3  | 13.9  | 20.5  |
| 374265 | 41.7  | 49.9  | 30.9  | 46.7  |
| 374174 | 64.9  | 86.2  | 70.8  | 114.3 |
| 369314 | 24.9  | 32.4  | 28.4  | 28    |
| 373674 | 22.5  | 17.6  | 20.5  | 16.7  |

|        |       |       |       |       |
|--------|-------|-------|-------|-------|
| 430309 | 18.4  | 12.8  | 19.6  | 15.5  |
| 430210 | 8.1   | 9.4   | 11.9  | 11.7  |
| 423559 | 15.8  | 24.7  | 17.7  | 17.6  |
| 437238 | 24.2  | 46    | 28.4  | 57.6  |
| 433261 | 35.7  | 43.8  | 32.7  | 35.8  |
| 433235 | 16.3  | 20.9  | 15.2  | 14.8  |
| 433217 | 11.7  | 17.3  | 13.7  | 12    |
| 433191 | 34.4  | 44.4  | 33.4  | 37.2  |
| 433289 | 19.3  | 17.6  | 28.9  | 20.5  |
| 433763 | 14.8  | 16.3  | 11.7  | 13.2  |
| 433675 | 13.2  | 13.1  | 10.9  | 9.7   |
| 433666 | 56.2  | 76.5  | 56.5  | 57.8  |
| 433572 | 3     | 8.4   | 3.3   | 7.9   |
| 433563 | 35.1  | 60.1  | 51    | 46.9  |
| 447817 | 11.7  | 15.9  | 9.9   | 13.2  |
| 408051 | 10.1  | 10.9  | 8.6   | 12    |
| 400575 | 54.4  | 68.9  | 70.5  | 68.4  |
| 417398 | 5.6   | 5.9   | 5.6   | 7.1   |
| 422193 | 208.5 | 264.6 | 219.4 | 269.9 |
| 422192 | 63.2  | 78.7  | 69.4  | 76.8  |
| 414426 | 20.8  | 23.3  | 18.4  | 21.5  |
| 414422 | 22.4  | 23.1  | 15.4  | 21.6  |
| 413662 | 2.2   | 1.4   | 1.8   |       |
| 413578 | 14.5  | 21.3  | 14.9  | 15.8  |
| 413569 | 7.6   | 12.4  | 9.3   | 11.8  |
| 413417 | 2.1   | 5.7   | 2     | 1.9   |
| 323678 | 7.7   | 8.9   | 8.4   | 7.8   |
| 323667 | 21.7  | 24.2  | 20.4  | 20.3  |
| 323510 | 63.7  | 67.2  | 68.9  | 61.6  |
| 289369 | 15.1  | 16.2  | 16.1  | 16.7  |
| 474219 | 9.8   | 12.1  | 8.8   | 12.3  |
| 290351 | 10.7  | 13.2  | 9.1   | 9.9   |
| 334014 | 70.3  | 81.9  | 66.9  | 89.8  |
| 474800 | 81.2  | 119.7 | 81.5  | 150.4 |
| 305422 | 10    | 16.5  | 16.2  | 16.1  |
| 470603 | 17.9  | 22.2  | 19.6  | 23.3  |
| 470727 | 27.3  | 26.9  | 21.6  | 26.7  |
| 293335 | 15.7  | 26.4  | 21.9  | 23.6  |
| 347398 | 26.8  | 24    | 26    | 27.4  |
| 260061 | 35.3  | 33.4  | 27.5  | 32.4  |
| 457922 | 20.6  | 19.5  | 20    | 24.4  |
| 278666 |       |       | 2.8   |       |
| 246948 | 39.9  | 43    | 36.7  | 44.6  |
| 280070 | 64.4  | 49    | 33.6  | 43.9  |
| 267922 | 6.8   | 12.7  | 6.2   | 27.4  |
| 373674 | 22.5  | 17.6  | 20.5  | 16.7  |
| 423573 | 24.3  | 33.1  | 21.5  | 22.4  |
| 349634 | 120.1 | 115.3 | 80.5  | 115   |
| 289266 | 12.5  | 15.2  | 10.8  | 13.1  |
| 289266 | 12.5  | 15.2  | 10.8  | 13.1  |
| 457620 | 9.4   | 13.1  | 13.8  | 14.6  |
| 260731 | 28.2  | 28.6  | 29.1  | 32.9  |

|        |       |       |       |       |
|--------|-------|-------|-------|-------|
| 413398 | 9.4   | 7.6   | 7     | 8.8   |
| 334017 | 127.1 | 129.2 | 120.8 | 149.3 |
| 433218 | 8.9   | 10    | 13.2  | 10.1  |
| 433402 | 27    | 33.3  | 33    | 26.6  |
| 433157 | 5.7   | 8     | 8.8   | 9     |
| 393048 | 9.5   | 13.4  | 10.8  | 15.2  |
| 433679 | 2.3   | 2.9   | 2.4   | 5.5   |
| 349813 | 60.9  | 56.4  | 48.8  | 66.4  |
| 433575 | 1.7   | 2.4   | 3.1   | 3.1   |
| 374400 | 20.8  | 16.7  | 14.3  | 19.5  |
| 413023 | 2     |       |       |       |
| 396560 | 131.4 | 147.5 | 104.6 | 140.7 |
| 430505 | 16.2  | 15.8  | 18    | 19.2  |
| 345386 | 60.3  | 72    | 74.3  | 50.3  |
| 315597 | 20.1  | 32.3  | 36.5  | 41.4  |
| 430411 | 32.2  | 38.5  | 28.5  | 33.7  |
| 400709 | 162.1 | 152.5 | 131   | 139.7 |
| 420634 | 3     | 2.9   | 1.6   | 2.2   |
| 431293 | 6.6   | 3.2   | 2.9   | 6     |
| 414535 |       | 1.4   | 1.5   |       |
| 448822 | 14.1  | 17    | 20.6  | 24.7  |
| 315736 | 77.8  | 70.7  | 46.6  | 65.9  |
| 369240 | 8     | 9.4   | 5.9   | 8.7   |
| 450973 | 3     | 5.8   | 3.2   | 5.1   |
| 433347 | 11.9  | 11.5  | 8.3   | 15.1  |
| 268715 | 3.3   | 5.4   | 2.9   | 3.2   |
| 268715 | 3.3   | 5.4   | 2.9   | 3.2   |
| 407917 | 5.1   | 2.3   | 1.9   | 5.7   |
|        |       |       |       |       |
| 470549 | 40    | 28.9  | 26.8  | 31.6  |
| 447880 | 33.2  | 58.7  | 33.4  | 54.5  |
| 323017 | 3.2   | 6.4   | 5.3   | 3.3   |
| 426686 | 32.3  | 32.5  | 32.6  | 39.6  |
| 315752 | 19.5  | 19    | 9.8   | 13.3  |
| 423572 | 6.8   | 12.8  | 13.1  | 15    |
| 305430 | 61.2  | 53.2  | 54.8  | 60.2  |
| 292966 | 5.6   | 8.5   | 6.1   | 6.5   |
| 364064 |       |       |       | 1.8   |
| 411177 | 10    | 11.6  | 10.3  | 15    |
| 315729 | 112.4 | 97.7  | 57.8  | 72.2  |
| 404627 | 44.6  | 43.5  | 43.3  | 47    |
| 396662 | 78.2  | 89.9  | 71.2  | 90.7  |
| 447883 | 11.8  | 19.9  | 14    | 21.6  |
| 430413 | 26.5  | 31.6  | 24.6  | 32.4  |
| 322464 | 2.9   | 5.7   | 2.7   | 6.4   |
| 396488 | 30    | 38.5  | 33.6  | 33.9  |
| 457794 | 9.4   | 12.7  | 10.3  | 15.6  |
| 404374 | 11    | 16.6  | 23.4  | 20    |
| 430515 | 14.3  | 15.6  | 14.2  | 12.5  |
| 437170 | 8.2   | 7.9   | 7.4   | 6     |
| 404384 | 2.8   | 8.5   | 6.7   | 7.4   |
| 450964 |       | 6.7   | 3.1   | 3.2   |

|        |       |       |       |       |
|--------|-------|-------|-------|-------|
| 380686 | 5.6   | 5.4   | 2.9   | 5.3   |
| 366804 | 8.4   | 7.3   | 7.1   | 5     |
| 366860 | 16.8  | 15.1  | 16.5  | 17.5  |
| 366927 | 15.3  | 15.9  | 12.6  | 15.6  |
| 453673 | 3.3   | 7.9   | 8.1   | 8.8   |
| 434335 | 10.6  | 11.8  | 14.2  | 11.6  |
| 434328 | 9.5   | 10.8  | 8.6   | 9.1   |
| 434206 | 16.1  | 19.4  | 23.2  | 21.8  |
| 434111 | 23.1  | 22    | 30    | 28.2  |
| 434488 | 27.5  | 28    | 19.8  | 25.8  |
| 441858 | 28.4  | 23.3  | 17.8  | 21.8  |
| 441824 | 34    | 33.5  | 14.4  | 17.3  |
| 446921 | 9.6   | 11.3  | 12.2  | 12    |
| 446922 | 17.6  | 21.4  | 21.6  | 23.2  |
| 446648 | 53.8  | 54.9  | 50.9  | 65.2  |
| 334369 | 126.4 | 119.7 | 103.7 | 135.3 |
| 313708 | 134.3 | 201.4 | 195.5 | 206.6 |
| 304876 | 88.9  | 87.5  | 73.7  | 93.1  |
| 306707 | 83.4  | 88.1  | 110.2 | 278   |
| 306710 | 22    | 29    | 32.9  | 23.7  |
| 350170 | 44    | 60.9  | 47    | 63.7  |
| 349263 | 25.5  | 21.8  | 15.8  | 18.9  |
| 279922 | 133.5 | 161.5 | 169.4 | 176.9 |
| 279929 | 23.2  | 25.7  | 28.8  | 26.7  |
| 352019 | 3     | 5.6   | 3.1   | 5.6   |
| 352006 | 3.4   | 3.2   | 2.3   | 2.1   |
| 249802 | 36.4  | 54.7  | 50.3  | 52.4  |
| 335297 | 152.1 | 144.3 | 140.1 | 148.8 |
| 393444 | 51.7  | 46.5  | 40.5  | 43.7  |
| 370064 | 103.5 | 102.5 | 88.5  | 98.9  |
| 280000 | 53.6  | 55.9  | 52.3  | 74.2  |
| 434061 | 2.7   | 3.1   | 6.7   | 3     |
| 394774 | 31.6  | 32.9  | 30.6  | 36.5  |
| 264576 | 27.5  | 28    | 29    | 30.4  |
| 319354 | 5.3   | 3.3   | 7.9   | 5.9   |
| 453701 | 2.9   | 2     | 2.1   | 2.4   |
| 404968 | 9.5   | 11.5  | 7.5   | 10.9  |
| 323127 | 3.5   | 4.9   | 3.1   | 2.8   |
| 404833 | 15.8  | 13.2  | 12.9  | 12.8  |
| 374303 | 104.3 | 119   | 89.1  | 94.4  |
| 252517 | 81.2  | 97.3  | 103.7 | 111.4 |
| 369709 | 19.8  | 22.7  | 15.7  | 34.7  |
| 370714 | 185.7 | 174.3 | 172.2 | 175.4 |
| 432907 | 1.8   | 3.3   |       | 2.8   |
| 408498 | 8.4   | 8.6   | 10.2  | 6.2   |
| 311859 | 24.6  | 20    | 20.2  | 17.3  |
| 394809 | 8.5   | 10.4  | 6.6   | 8.6   |
| 350357 | 11.3  | 6.3   | 10.1  | 6.7   |
| 369717 | 79.6  | 97.7  | 77.1  | 142.2 |
| 338936 | 11.9  | 17.7  | 13    | 17.2  |
| 349122 | 5.5   | 5.7   | 3.2   | 5.7   |
| 338940 | 39.9  | 42.9  | 39.2  | 45.8  |

|        |       |       |       |       |
|--------|-------|-------|-------|-------|
| 304870 | 96.8  | 94.7  | 84.6  | 95.3  |
| 441735 | 2.5   | 2.3   | 2.7   | 2.5   |
| 304830 | 171.2 | 183.6 | 238.3 | 235.5 |
| 304833 | 20.1  | 27.2  | 25.2  | 29.9  |
| 441736 | 6.4   | 8.9   | 7.7   | 8.1   |
| 350229 | 11.4  | 15.2  | 15.8  | 15.7  |
| 374281 | 160.4 | 172.7 | 142.9 | 167.8 |
| 395748 | 58.3  | 50    | 53.1  | 53.7  |
| 393663 | 15.9  | 17.5  | 18.8  | 16.6  |
| 393533 | 57.3  | 39.3  | 35.1  | 39.8  |
| 391814 | 18.8  | 16    | 23.3  | 23.3  |
| 377795 | 38.2  | 26.7  | 28    | 28.2  |
| 370420 | 51.3  | 53.1  | 68.1  | 56.7  |
| 456046 | 15.1  | 11.7  | 10.5  | 10.5  |
| 367768 | 7.9   | 2.8   | 3.3   | 6     |
| 367756 | 6.6   | 2.8   | 6.7   | 5.5   |
| 373149 | 101   | 94.3  | 96.3  | 84.7  |
| 373070 | 20.1  | 27.5  | 33    | 22.7  |
| 422332 | 18.8  | 11.4  | 16.8  | 14.6  |
| 422271 | 28.7  | 21.8  | 28.6  | 21.3  |
| 422240 | 5.9   | 2.8   | 3.3   | 2.5   |
| 423715 | 9.6   | 10.6  | 10.2  | 8.4   |
| 435871 | 7.8   | 2.7   | 8.4   | 4.4   |
| 432818 | 1.6   |       |       |       |
| 432785 | 10    | 6.9   | 10.5  | 8.2   |
| 432727 |       |       |       | 1.5   |
| 432700 | 5.3   | 2.8   | 5.6   | 3.2   |
| 432891 | 9.4   | 7.5   | 9.5   | 7.9   |
| 431822 | 104   | 83.5  | 77.1  | 81.8  |
| 431819 | 85.7  | 64.5  | 76    | 73.4  |
| 422223 | 186.7 | 177.4 | 232.8 | 200.9 |
|        |       |       |       |       |
| 432991 | 7.3   | 5.6   | 8.2   | 6.6   |
| 432926 | 1.5   | 2     | 1.5   |       |
| 433113 | 10.4  | 6.7   | 6.3   | 7     |
| 433532 | 3.5   | 2.1   | 3.2   | 2.6   |
| 446650 | 51    | 38.9  | 50.6  | 53.6  |
| 446652 | 33.7  | 27.5  | 28.9  | 35.5  |
| 401826 | 126.5 | 89.6  | 76.6  | 78.7  |
|        |       |       |       |       |
| 446337 | 45.5  | 42.8  | 54.2  | 53.1  |
| 416591 | 13.1  | 14.6  | 15.6  | 15    |
| 416574 | 29.2  | 21.9  | 25.6  | 25.8  |
| 446426 | 57.3  | 72.2  | 124.7 | 32.8  |
| 446426 | 57.3  | 72.2  | 124.7 | 32.8  |
| 415447 | 3.2   | 6.4   | 7.7   | 6.5   |
| 415295 | 3.4   | 1.9   | 2.3   | 3.1   |
| 415176 | 17.2  | 11.5  | 16.2  | 14.1  |
| 415164 | 46.4  | 38.4  | 35.9  | 34.9  |
| 446441 | 83.2  | 96.2  | 96.6  | 98    |
| 446447 | 51.2  | 55.1  | 68.9  | 69.4  |
| 325789 | 53.1  | 67.7  | 85.2  | 80.9  |

|        |       |       |       |       |
|--------|-------|-------|-------|-------|
| 325940 | 68.7  | 57.4  | 62.2  | 61    |
| 289703 | 54.5  | 35.8  | 46.4  | 44.8  |
| 289569 | 24.5  | 22.6  | 26.3  | 25.1  |
| 284497 | 40.2  | 38.7  | 34.6  | 35.5  |
| 284399 | 35.1  | 34.3  | 26.9  | 30.8  |
| 335822 | 49.6  | 39.5  | 39.6  | 45.6  |
| 309664 | 63.1  | 47.2  | 53.2  | 47.8  |
| 471641 | 2.4   | 5.6   | 6     | 6.6   |
| 467783 | 13.3  | 12.7  | 20.1  | 12    |
| 296197 | 24.6  | 17.6  | 20.5  | 18.4  |
| 467834 | 21.3  | 18.1  | 28.7  | 17.5  |
| 296200 | 19.1  | 16.2  | 21.3  | 17.7  |
| 467978 | 6.2   | 3.2   | 5.6   | 5.5   |
| 266267 | 15.8  | 8.2   | 6.2   | 6     |
|        |       |       |       |       |
| 458861 | 15.8  | 26.6  | 32    | 27.4  |
| 336331 | 21.5  | 24.7  | 33    | 26.1  |
| 266187 | 1.3   |       |       | 1.7   |
| 455559 | 19.2  | 12.3  | 12    | 9.6   |
| 370708 | 25.4  | 22.6  | 18.9  | 23.3  |
| 448117 | 5.8   | 3.1   | 8.7   | 7.2   |
| 401687 | 27    | 20    | 23    | 21.8  |
| 309548 | 14.4  | 13.6  | 13.7  | 15.4  |
| 452110 | 111.9 | 98.5  | 108.5 | 109.5 |
| 248960 | 22    | 26.8  | 28    | 28.1  |
| 459000 | 56.1  | 46.2  | 42.6  | 50.7  |
| 371206 | 192.7 | 182.3 | 186.1 | 207.4 |
| 460619 | 42.1  | 39.1  | 64.8  | 58.8  |
| 370413 | 195.6 | 202.4 | 241.2 | 205.6 |
| 460717 | 148.5 | 106.1 | 111.4 | 116.2 |
| 369453 | 184.7 | 157.7 | 176.8 | 153.9 |
| 338228 | 52.3  | 45.6  | 54    | 56.6  |
| 337279 | 39.3  | 39.4  | 56.7  | 59.6  |
| 336386 | 90.7  | 72.7  | 82.5  | 74.3  |
| 393653 | 50.2  | 48.1  | 48    | 54.1  |
| 433388 | 7.4   | 6.6   | 6     | 5.8   |
| 323401 | 5.3   | 3.4   | 5.6   | 3.3   |
| 370325 | 157.7 | 158.3 | 174.2 | 175.8 |
| 423762 | 82.3  | 63.1  | 76    | 70    |
| 448493 | 32.7  | 26.9  | 26.9  | 24.5  |
| 371371 | 103.4 | 84.3  | 80.9  | 82.9  |
| 423778 | 33.3  | 36    | 34.3  | 32.9  |
| 261632 | 21.3  | 33.4  | 38.2  | 40.7  |
| 377800 | 162.1 | 102.2 | 87.3  | 83.3  |
| 431676 | 14.5  | 18.2  | 20.7  | 21.6  |
| 377678 | 25.9  | 30.1  | 37.8  | 33.3  |
| 369457 | 26.8  | 22.7  | 27.3  | 24.7  |
| 327192 | 2.5   | 2     | 2.9   | 2.2   |
| 371209 | 23.6  | 23.8  | 26.7  | 28.4  |
| 448156 | 39    | 42.2  | 53.5  | 41.7  |
| 309972 | 16.9  | 18.2  | 15.4  | 26.9  |
| 370319 | 540.2 | 507   | 563.5 | 536.2 |

|        |       |       |       |       |
|--------|-------|-------|-------|-------|
| 325936 | 33.6  | 22.8  | 26    | 27    |
| 283112 | 19.2  | 24.7  | 42.2  | 33.6  |
| 393615 | 38.2  | 33.2  | 35.8  | 40.5  |
| 435783 | 22.9  | 24    | 24.1  | 27.9  |
| 367644 |       | 1.7   |       |       |
| 448059 | 8.1   | 2.8   | 10.8  | 8.1   |
| 296066 | 1.9   | 3.5   | 2.8   | 2.9   |
| 372802 | 18    | 16.7  | 19    | 15.7  |
| 261491 | 20.8  | 15.1  | 18.9  | 17.6  |
| 369464 | 56.6  | 45.4  | 59.9  | 48.5  |
| 281572 | 19.9  | 17.6  | 17.2  | 20.8  |
| 309066 | 1.3   | 2     | 3     | 1.3   |
| 431683 | 53.9  | 43.9  | 41.5  | 36.9  |
| 309411 | 117.2 | 80.8  | 80.5  | 86.5  |
| 369749 | 66.4  | 53.7  | 58.7  | 59.3  |
| 261751 | 75.2  | 77.6  | 80.4  | 88.9  |
| 369975 | 35    | 34.9  | 58.8  | 52.2  |
| 327366 | 2.3   | 1.6   | 2.7   | 5.2   |
| 370243 | 76.7  | 66.4  | 100.3 | 86.1  |
| 450401 | 50    | 39.9  | 33.1  | 42.6  |
| 309303 | 57.3  | 67.7  | 98.9  | 87.4  |
| 334280 | 200.5 | 154.8 | 167.3 | 200.7 |
| 459001 | 20.4  | 16.1  | 11.7  | 14.7  |
| 283130 | 177.6 | 227.4 | 284.4 | 261.4 |
| 295820 |       |       | 2.7   | 1.9   |
| 433198 | 14.3  | 11.2  | 12.4  | 11.9  |
| 370541 | 202.4 | 155.2 | 149.2 | 154.5 |
| 335023 | 84.9  | 74.4  | 118.6 | 83.9  |
| 323387 | 6.5   | 5.2   | 3.1   | 4.9   |
| 456620 | 13.3  | 7.3   | 11    | 6.5   |
| 452023 | 45.9  | 44.2  | 48.6  | 49.6  |
| 432927 | 2.9   | 1.3   | 2.1   | 1.9   |
| 382148 | 16.8  | 19.8  | 20.6  | 21.6  |
| 382098 | 76.3  | 82.9  | 78.8  | 79.6  |
| 382082 | 54.3  | 56.8  | 65.1  | 64.1  |
| 381532 | 13.7  | 15.8  | 26.9  | 18.5  |
| 381449 | 17.3  | 18.7  | 25.6  | 22.6  |
| 449917 | 39.6  | 38.5  | 63.7  | 45.7  |
| 394692 | 31.3  | 27.2  | 28.9  | 42.1  |
| 397800 | 2.2   | 1.5   | 2     | 1.7   |
| 449786 | 21.2  | 15.2  | 15.3  | 16.6  |
| 449853 | 40.3  | 38.1  | 55    | 36.5  |
| 388044 | 11.5  | 14.2  | 16.8  | 10.8  |
| 387987 | 1.6   | 2.8   | 1.3   | 1.9   |
| 392995 | 229.8 | 203.8 | 179.2 | 209.1 |
| 378955 | 11.2  | 10.1  | 11.9  | 10.1  |
| 358750 | 55.5  | 54.8  | 51.9  | 56    |
| 358677 | 15    | 14.2  | 14.7  | 14.3  |
| 358609 | 10.2  | 11.7  | 8.9   | 9.6   |
| 358808 | 11    | 10.8  | 10.3  | 13.6  |
| 358455 | 6.7   | 3.2   | 2.6   | 5.3   |
| 358864 | 27.4  | 24.1  | 23    | 27.4  |



|        |      |      |       |       |
|--------|------|------|-------|-------|
| 358902 | 1.7  | 2.5  |       | 1.6   |
| 359595 | 2    |      | 2.2   |       |
| 457252 | 58.4 | 72   | 54.5  | 66.4  |
| 457376 | 82   | 79.8 | 64.7  | 75.7  |
| 375505 | 1.9  | 2.7  | 5.6   | 3.1   |
| 375434 | 9.5  | 9.5  | 8.8   | 10.6  |
| 378950 | 8.9  | 11.7 | 12.3  | 8.2   |
| 378852 | 5.8  | 2.3  | 3.4   | 5.4   |
| 372205 | 26.2 | 25.7 | 31.6  | 29.2  |
| 371688 | 39.5 | 34.5 | 32    | 39.9  |
| 429240 | 13.9 | 18.4 | 16.4  | 19    |
| 429327 | 74.5 | 67.7 | 59.4  | 68.4  |
| 425971 | 28.4 | 24.2 | 27.2  | 30.7  |
| 425873 | 50.7 | 49.8 | 41.1  | 39.5  |
| 425799 | 28.9 | 26.5 | 25.7  | 23.5  |
| 425916 | 31.8 | 28.5 | 28.8  | 28.3  |
| 404925 | 16   | 17   | 15.5  | 14.6  |
| 404877 | 13.4 | 19.4 | 15.5  | 16.1  |
| 404838 | 51.2 | 62.1 | 36    | 31.5  |
| 447945 | 17.5 | 13   | 19.9  | 12.6  |
| 404983 | 47   | 38.9 | 12.7  | 12.8  |
| 405404 | 58.1 | 59.9 | 52.2  | 57.7  |
| 405399 | 27.5 | 32.5 | 29.8  | 31.2  |
| 404993 | 26.1 | 25.3 | 19.6  | 17.3  |
| 418238 | 2.4  | 1.9  | 2     |       |
| 417877 | 1.6  | 2.3  | 1.8   | 2.4   |
| 417730 | 8.3  | 8.3  | 9     | 9.6   |
| 417610 | 29.6 | 35.7 | 25.2  | 21.9  |
| 446334 | 38.7 | 46   | 47.1  | 45.8  |
| 411452 | 10.3 | 10.1 | 10.2  | 7.7   |
| 411452 | 10.3 | 10.1 | 10.2  | 7.7   |
| 412273 | 15.4 | 19.8 | 19.9  | 23.7  |
| 412270 | 12.2 | 16.6 | 15.7  | 17.8  |
| 413107 | 17.7 | 20.3 | 18.5  | 18.3  |
| 413099 | 31.4 | 29   | 27.1  | 31.2  |
| 412938 | 5.5  | 6.9  | 7.5   | 8     |
| 466414 | 6.9  | 11   | 6.5   | 16.4  |
| 336019 | 11   | 19.1 | 14.1  | 40.4  |
| 285921 | 15.3 | 19.2 | 16.5  | 20.6  |
| 285914 | 85.4 | 87.6 | 73.2  | 91.7  |
| 319779 | 10.6 | 9.9  | 9.7   | 10.9  |
| 285552 | 46.6 | 42.5 | 48.5  | 46.8  |
| 285427 | 56.3 | 60.7 | 49.7  | 56.8  |
| 285421 | 22.4 | 20.2 | 19.4  | 21.5  |
| 285294 | 32.9 | 51.9 | 61    | 53.7  |
| 285306 | 74.1 | 94.8 | 103.9 | 104.6 |
| 319759 | 34.1 | 27.2 | 34.4  | 27.3  |
| 474013 | 34.4 | 44.3 | 33.3  | 54.4  |
| 309205 | 22.1 | 26.6 | 28.6  | 23.4  |
| 317194 | 11.8 | 13.5 | 13.2  | 13.6  |
| 342888 | 30.7 | 36.4 | 34.8  | 35.3  |
| 255873 | 9.6  | 6.1  | 6.8   | 8.4   |

|        |       |       |       |       |
|--------|-------|-------|-------|-------|
| 263789 | 2.3   | 1.7   | 2.2   | 1.7   |
| 346302 | 22.6  | 20.7  | 18.5  | 24.5  |
| 336003 | 365   | 480   | 339.9 | 760.9 |
| 429324 | 109.5 | 106.4 | 101.6 | 115.9 |
| 372081 | 69.9  | 67.1  | 74    | 67.8  |
| 429277 | 126.3 | 128.6 | 112.8 | 119.3 |
| 285542 | 8     | 8.9   | 7.4   | 6.3   |
| 314877 | 48.9  | 42.2  | 41.5  | 47.3  |
| 283738 | 3.1   | 2.6   | 1.5   | 1.7   |
| 429239 | 99.6  | 108.8 | 112.4 | 113.7 |
| 389215 |       | 1.6   | 2.1   | 1.9   |
| 372385 | 40.3  | 39.9  | 36.8  | 39.7  |
| 372274 | 38.5  | 38.2  | 38.7  | 46.1  |
| 341474 | 21.9  | 15.6  | 13.8  | 19.9  |
| 333687 | 24.5  | 17.2  | 10.9  | 17.1  |
| 404701 | 8.1   | 9.4   | 7.7   | 7.5   |
| 341327 | 52.8  | 62.2  | 54.4  | 61.4  |
| 400769 | 34.6  | 29.3  | 26.9  | 30    |
| 448972 | 2.7   | 3.1   | 2.4   | 2.7   |
| 388051 | 5.5   | 2.2   | 5.5   | 3.1   |
| 401772 | 87.7  | 79.4  | 61.7  | 74.8  |
| 314864 | 125.1 | 113.8 | 96.4  | 104.2 |
| 372177 | 62.7  | 70.8  | 62.6  | 73.3  |
| 341871 | 11.7  | 10    | 7.9   | 7.5   |
| 412413 | 2.7   | 2.9   | 6     | 2.9   |
| 421803 |       |       |       | 1.8   |
| 370369 | 23.4  | 25.5  | 24.8  | 41.1  |
| 466410 | 1.9   | 2.2   | 2     | 6.3   |
| 387995 | 2.2   |       |       | 1.7   |
| 425416 | 8     | 6.3   | 5.8   | 7.1   |
| 372524 | 42.3  | 41.7  | 42.1  | 37.8  |
| 413553 | 6.2   | 9.2   | 7.4   | 6.9   |
| 405263 | 2.1   | 2.2   | 3.3   | 5.1   |
| 317305 | 13.2  | 11.9  | 10.9  | 13.8  |
| 474059 | 1.8   | 6.2   | 3.3   | 9.1   |
| 449976 | 27    | 22.4  | 30.7  | 27.1  |
| 401366 | 2.6   | 5     | 2.2   | 6.7   |
| 436914 |       |       |       | 1.7   |
| 431015 | 21.9  | 17.4  | 16.5  | 23.6  |
| 412930 | 2     | 2.2   | 1.5   | 3.2   |
| 304679 | 33    | 29    | 26.9  | 25.4  |
| 317218 | 41.9  | 42.2  | 42.1  | 39.9  |
| 371917 | 125.1 | 117.5 | 125.6 | 133.5 |
| 431818 | 13.4  | 13.5  | 9.2   | 9.2   |
| 417710 | 1.5   |       |       |       |
| 382026 | 6.1   | 8.6   | 10.3  | 7.5   |
| 413317 | 3.1   | 1.8   | 2.5   | 3.3   |
| 417973 | 2.3   |       |       | 1.7   |
| 317326 | 27.2  | 22.1  | 22.1  | 22.8  |
| 465406 | 112.3 | 116.2 | 120   | 112.9 |
| 404528 | 7.1   | 7.8   | 8.5   | 9     |
| 405535 | 28.6  | 31.3  | 27.5  | 33.1  |

|        |       |       |       |       |
|--------|-------|-------|-------|-------|
| 452433 | 17.3  | 13.8  | 17.7  | 20.8  |
| 341501 | 13.5  | 10.9  | 9.4   | 10.6  |
| 405220 | 8.7   | 8     | 6.6   | 8.5   |
| 381490 | 12.8  | 14.2  | 22.7  | 13.5  |
| 304370 | 19.8  | 15.7  | 16    | 18.5  |
| 432393 | 11.5  | 8.6   | 10.9  | 9.8   |
| 432393 | 11.5  | 8.6   | 10.9  | 9.8   |
| 381633 | 1.9   | 2.5   | 3.1   | 2.8   |
| 454100 | 8.4   | 8.7   | 8.3   | 5.7   |
| 372413 | 43.8  | 36.6  | 38.1  | 42.1  |
| 341359 | 42.9  | 41.3  | 43.3  | 42.7  |
| 341231 | 25.2  | 30.6  | 33.9  | 29.5  |
| 311926 | 126.3 | 113   | 136.2 | 131.8 |
| 456514 | 8.6   | 8.8   | 9.3   | 7.5   |
| 456514 | 8.6   | 8.8   | 9.3   | 7.5   |
| 289715 | 16.7  | 18.1  | 26.9  | 18    |
| 424749 | 2.5   | 2.7   | 6.4   | 3.1   |
| 341206 | 20.6  | 20.5  | 19.6  | 19.6  |
| 468883 | 6.1   | 2.1   | 2.2   | 2.4   |
| 432071 | 13.1  | 10.6  | 8.6   | 12.5  |
| 382163 | 11.7  | 8     | 8.6   | 8.3   |
| 399190 | 52.1  | 45.7  | 41.7  | 50.4  |
| 289831 | 5.2   | 2.8   | 2.4   | 4.5   |
| 468283 | 2.3   | 1.6   | 2.2   | 2.6   |
| 311685 | 172.9 | 260.1 | 326.8 | 308.7 |
| 315002 | 13.1  | 14    | 13.3  | 15.1  |
| 371804 | 293.7 | 282.9 | 299.3 | 293.7 |
| 381415 | 6.8   | 5.7   | 10.4  | 8.6   |
| 404388 | 4.9   | 2.1   | 5.7   | 2.7   |
| 337170 | 189.6 | 244.6 | 285   | 276.3 |
| 375321 | 5.7   | 5.3   | 2.7   | 1.5   |
| 395661 | 2     | 2.8   | 3.1   | 2.6   |
| 412150 | 1.2   | 1.8   | 2.3   | 2.3   |
| 387139 | 2.9   | 2.9   | 2.5   | 2.2   |
| 387120 | 31.7  | 28.7  | 41.4  | 37.2  |
| 381677 | 41.6  | 32.6  | 34.7  | 34.1  |
| 381673 | 35.6  | 32.1  | 36    | 36.4  |
| 381574 | 9.7   | 11.1  | 13.9  | 12.3  |
| 395803 | 14.2  | 20.5  | 24.5  | 26.9  |
| 390047 | 12.5  | 13.9  | 12.6  | 12.3  |
| 390135 | 2.7   | 2.5   | 1.8   | 1.6   |
| 390156 | 34.7  | 42.7  | 41.4  | 44.6  |
| 390182 | 63.4  | 62.1  | 66.2  | 62.3  |
| 393578 | 73.9  | 73.6  | 70    | 71.8  |
| 390299 | 6.1   | 1.8   | 2.4   | 2.7   |
| 390252 | 39.7  | 38    | 36.9  | 35.9  |
| 390227 | 59.7  | 53.7  | 57.2  | 55.3  |
| 390205 | 50.9  | 49.9  | 59.3  | 54.1  |
| 390193 | 15.3  | 15.7  | 17.2  | 17.5  |
| 390375 |       | 1.4   | 1.5   |       |
| 364448 | 5.6   | 3.2   | 1.4   | 2.2   |
| 370276 | 194.6 | 260   | 339.6 | 338.1 |

|        |       |       |       |       |
|--------|-------|-------|-------|-------|
| 440041 | 6.1   | 6     | 2.9   | 3.4   |
| 440185 | 7.8   | 6.4   | 6.2   | 8.4   |
| 399480 | 113.8 | 146.1 | 110.8 | 164.2 |
| 448908 | 15.9  | 12.2  | 18.2  | 12.8  |
| 446033 | 5.5   | 2.7   | 6.5   | 5.5   |
| 446187 | 7.9   | 8.4   | 8     | 10.8  |
| 445671 | 22.3  | 22.1  | 29.1  | 23.4  |
| 409619 | 7.9   | 7.9   | 12.8  | 8.4   |
| 409613 | 11.9  | 14.2  | 15.9  | 17.4  |
| 409604 | 1.7   | 2.5   | 2.2   | 2.9   |
| 409507 | 8.7   | 14.5  | 13.7  | 14.3  |
| 409725 | 10    | 11.7  | 10.8  | 9.8   |
| 409851 | 1.6   | 1.4   | 1.5   | 1.9   |
| 414879 | 2.5   | 1.8   | 2.6   | 2.1   |
| 446408 | 59.5  | 57.1  | 50.3  | 58.7  |
| 414999 | 12.8  | 13.1  | 18.2  | 14    |
| 415299 | 2.2   | 5.8   | 6.6   | 2.8   |
| 285492 | 26.4  | 20.2  | 26.8  | 23.7  |
| 305357 | 92.7  | 91.2  | 86.2  | 85.9  |
| 309202 | 42.8  | 53.8  | 77.6  | 62.7  |
| 318676 | 26.5  | 22.9  | 22.9  | 20.4  |
| 318535 | 23.3  | 28.6  | 30.8  | 26.9  |
| 291805 | 30.5  | 52.3  | 17.3  | 64.7  |
| 318055 | 18.4  | 12.5  | 10.8  | 9.6   |
| 314825 | 29    | 32.6  | 48.5  | 34.6  |
| 475416 | 102.9 | 141.4 | 151.7 | 174.6 |
| 338324 | 54.3  | 63.2  | 82.8  | 53.8  |
| 245299 | 28.6  | 31.4  | 32.7  | 30.8  |
| 290088 | 271.3 | 273.1 | 201.9 | 154.3 |
| 246650 | 24.6  | 21.3  | 24.4  | 25    |
| 341406 | 189.2 | 210.2 | 179.2 | 170.7 |
| 341362 | 48.2  | 66.1  | 81.3  | 73.7  |
| 390270 |       | 1.7   |       |       |
| 390241 | 3     | 2.5   | 2.8   | 2.1   |
| 288263 | 8.1   | 10.8  | 6.7   | 12.1  |
| 342041 | 20.6  | 15.1  | 18.8  | 18.3  |
| 336912 | 242.3 | 296.5 | 405   | 324   |
| 390008 | 1.8   |       | 1.4   | 1.4   |
| 472750 | 7.1   | 5.9   | 7.3   | 6.4   |
| 318207 | 14.5  | 11    | 10.8  | 10    |
| 290017 | 15.5  | 18.9  | 20.5  | 18.3  |
| 338486 | 79    | 67.5  | 72.5  | 77.2  |
| 291816 | 6.6   | 8.8   | 2.6   | 12.1  |
| 243880 | 94    | 119   | 127.2 | 144.8 |
| 370283 | 79.1  | 93.5  | 113.4 | 102.5 |
| 263218 | 23.2  | 19.7  | 25.9  | 15.9  |
| 371621 | 83.7  | 89.6  | 78.7  | 80    |
| 374408 | 21    | 24    | 19.8  | 22.8  |
| 318045 | 19    | 13.2  | 13.4  | 20.6  |
| 246520 | 10.3  | 14.9  | 17.2  | 18.2  |
| 370271 | 340.5 | 259.4 | 137.4 | 459.7 |
| 339264 | 85.2  | 82.1  | 86    | 82.7  |

|        |       |       |       |       |
|--------|-------|-------|-------|-------|
| 381429 | 96.1  | 96    | 104.6 | 88.1  |
| 333892 | 21.9  | 20.8  | 20.5  | 22.9  |
| 374318 | 59.5  | 71.9  | 46.7  | 38    |
| 399478 | 18.1  | 21.9  | 20.5  | 30.2  |
| 395879 | 210.9 | 171.5 | 171.5 | 174.9 |
| 281620 | 44.2  | 48.8  | 52.8  | 48.8  |
| 340928 | 18.2  | 21.1  | 19.8  | 27.2  |
| 381450 | 3     | 2.4   | 6     | 6.4   |
| 341295 | 45.3  | 66.6  | 76.7  | 65.6  |
| 283106 | 52.7  | 68    | 63    | 43.5  |
| 389981 |       | 1.5   |       | 2     |
| 374308 | 23.7  | 27.8  | 40.8  | 27.6  |
| 279582 | 20.4  | 27.4  | 27.1  | 33.5  |
| 384441 | 5.7   | 8.4   | 6.5   | 9.8   |
| 384583 | 60.7  | 62.5  | 43.8  | 76.8  |
| 384569 | 27.8  | 39.7  | 14.8  | 28.6  |
| 451471 | 13.2  | 9.8   | 9.5   | 7.8   |
| 380411 | 17.6  | 16.6  | 16    | 17.2  |
| 380555 | 67.6  | 81.6  | 57.7  | 70.2  |
| 380662 | 22.7  | 19.6  | 17.1  | 20.8  |
| 452295 | 15.7  | 12.8  | 15.1  | 18.1  |
| 382494 | 44.8  | 40.9  | 52    | 50.8  |
| 382459 | 49.8  | 41.3  | 44.6  | 38.6  |
| 382373 | 47.1  | 40.7  | 45.3  | 45.2  |
| 382266 | 16.5  | 12    | 13.1  | 13    |
| 382551 | 42.9  | 35.2  | 41.4  | 42.8  |
| 382856 | 7.4   | 3.2   | 3.1   | 5.9   |
| 382757 | 32.6  | 24.4  | 24.6  | 23.3  |
| 452268 | 2.2   | 2.1   |       | 1.7   |
| 382644 | 29.4  | 27.4  | 26.4  | 30.4  |
| 381863 | 66.1  | 61.8  | 43.4  | 63.3  |
| 381835 | 78.6  | 83.3  | 46.9  | 80    |
| 381684 | 25.6  | 23.4  | 21.8  | 30.8  |
| 382008 | 2.1   | 3.1   | 5.3   | 1.8   |
| 396490 | 36.1  | 28.6  | 33    | 38.6  |
| 394453 | 20.8  | 23.8  | 28.5  | 26    |
| 449379 | 18.2  | 20.5  | 20.2  | 23.9  |
| 449387 | 8.5   | 9.4   | 8.7   | 9.7   |
| 449043 | 48.2  | 52    | 52.7  | 68.9  |
| 449127 | 13.2  | 16.2  | 14.7  | 26.6  |
| 449128 | 10.5  | 20.1  | 16.5  | 34.5  |
| 449199 | 10.4  | 6.1   | 7.9   | 5     |
| 389994 |       | 2.5   | 2.8   | 1.7   |
| 388495 | 5.6   | 3.2   | 2.4   | 6.4   |
| 388994 | 7.1   | 10.9  | 11.8  | 12.7  |
| 389062 | 36.5  | 40    | 39.7  | 43.6  |
| 389054 | 57.8  | 65.1  | 59    | 63.1  |
| 389024 | 63.2  | 89.3  | 97.8  | 110.6 |
| 389000 | 9.8   | 14.4  | 12.5  | 14.8  |
| 391574 | 5.1   | 3.2   | 3     | 5.4   |
| 390359 | 10    | 12.7  | 12.5  | 13.6  |
| 390282 | 3.2   | 2.5   | 2.8   | 1.7   |

|        |      |       |       |       |
|--------|------|-------|-------|-------|
| 390853 | 2.4  | 2.8   | 1.7   | 5.4   |
| 391239 | 4.8  | 5.9   | 6.9   | 6.9   |
| 391230 | 2.2  | 8.1   | 7.8   | 6.2   |
| 391177 | 2.9  | 5.1   | 5.8   | 5.7   |
| 391128 | 64.9 | 87.9  | 73.5  | 93.3  |
| 391101 | 7.9  | 13.6  | 8.8   | 8.6   |
| 391094 | 24.8 | 41.3  | 41.4  | 49.5  |
| 391083 | 76.8 | 93.1  | 87.5  | 110.7 |
| 391050 | 27   | 34.1  | 26.8  | 31.4  |
| 391044 | 42   | 52.4  | 50.4  | 60.4  |
| 391018 | 99.3 | 123.3 | 112.5 | 126.4 |
| 390965 | 34.5 | 48    | 36.8  | 43    |
| 390954 | 74   | 96.6  | 99.3  | 116.3 |
| 390924 | 48.1 | 69.9  | 68.5  | 72.6  |
| 391457 | 1.4  | 1.4   | 1.8   | 1.4   |
| 361548 | 34.7 | 38.7  | 37.7  | 50.3  |
| 365755 | 1.8  | 2.9   | 3.3   | 2.9   |
| 365742 | 23.1 | 29.3  | 30.6  | 24.5  |
| 365794 | 9.1  | 13.9  | 12.9  | 15.1  |
| 366819 | 2.7  | 5.7   | 3.1   | 5.5   |
| 366761 | 6    | 7.3   | 6.1   | 7.7   |
| 366679 | 20.6 | 25.6  | 23.2  | 30.7  |
| 366605 | 8.4  | 10.4  | 9.5   | 11.7  |
| 366604 | 53.4 | 61.4  | 60.6  | 65.8  |
| 366525 | 26.6 | 28.6  | 32.7  | 36.3  |
| 366521 | 56.8 | 68.9  | 65.3  | 76.2  |
| 366401 | 23.2 | 28.2  | 32.2  | 37.5  |
| 366399 | 92.2 | 114.7 | 118.9 | 125.8 |
| 366304 | 8.2  | 13    | 11.6  | 11.1  |
| 366278 | 25.8 | 37.9  | 27.3  | 33.2  |
| 366275 | 99.8 | 135.1 | 122.2 | 140.4 |
| 366117 | 82.3 | 105.4 | 102.5 | 114   |
| 366115 | 97.8 | 125.3 | 113.5 | 132.3 |
| 365984 | 9    | 9.8   | 9.4   | 11.9  |
| 365955 | 75.7 | 88.7  | 91.3  | 104   |
| 365953 | 96.6 | 130.8 | 121.6 | 131.4 |
| 364039 | 12   | 15.2  | 12.8  | 14    |
| 363944 | 5.3  | 3     | 3.3   | 6     |
| 364893 | 5.3  | 5.6   | 2.5   | 6.7   |
| 364761 | 13.1 | 15.4  | 14.7  | 15    |
| 355075 | 8.7  | 12.1  | 10.9  | 12.2  |
| 355870 | 3.1  | 6.7   | 2.3   | 7.8   |
| 355867 | 6.9  | 9.4   | 7.6   | 6.6   |
| 355751 | 41.1 | 57.9  | 50    | 62.9  |
| 355743 | 49   | 75.4  | 56.6  | 73.2  |
| 355626 | 62.4 | 104   | 89.7  | 106.9 |
| 355619 | 44.9 | 68.3  | 63.5  | 65.5  |
| 355227 | 7.5  | 8.3   | 3.4   | 6.5   |
| 352706 | 5.8  | 6.3   | 3     | 7     |
| 354066 | 91.2 | 116.2 | 117.2 | 114   |
| 353951 | 43.2 | 57.2  | 51.1  | 51.5  |
| 360049 | 2    | 2.5   | 5.5   | 2.4   |

|        |       |       |       |       |
|--------|-------|-------|-------|-------|
| 356750 | 7.8   | 9.9   | 7.4   | 9.5   |
| 356746 | 38.3  | 46.5  | 37.1  | 56.6  |
| 357584 | 12.4  | 13.7  | 12    | 10.6  |
| 357579 | 8.1   | 7.8   | 7.1   | 8.9   |
| 366875 | 5.8   | 3.2   | 5.4   | 6.4   |
| 366979 | 7.5   | 9.2   | 11.5  | 11.1  |
| 370278 | 57    | 60.7  | 64.6  | 90.6  |
| 367490 | 28.8  | 31.2  | 40.9  | 27.2  |
| 372713 | 44.6  | 48.5  | 33.6  | 52.2  |
| 373049 | 46.1  | 55.2  | 48.9  | 67.3  |
| 372344 | 62.5  | 76.7  | 63.8  | 86.1  |
| 371474 | 24.8  | 25.4  | 25.5  | 25.2  |
| 443308 | 13.5  | 14.6  | 14.3  | 16.8  |
| 443315 | 31.8  | 45    | 47.3  | 44    |
| 424831 | 26.7  | 24.8  | 27    | 33.1  |
| 424617 | 27.8  | 35.9  | 31.1  | 38.9  |
| 423686 | 81.9  | 93.1  | 102.9 | 108.8 |
| 444386 | 14.5  | 16.5  | 18.3  | 15.5  |
| 425300 | 13.8  | 10.8  | 11.1  | 16.1  |
| 425068 | 12.3  | 8.3   | 8.8   | 9.9   |
| 440676 | 6.4   | 8.6   | 10.3  | 9.7   |
| 440684 | 6     | 7.1   | 10.7  | 3.3   |
| 436663 | 2.6   | 6.6   | 3     | 5.6   |
| 436659 | 2.2   | 2.4   | 2     | 3     |
| 441233 | 18    | 25.9  | 20.2  | 30.9  |
| 441251 | 17.7  | 21    | 18.8  | 25.1  |
| 441099 | 5.1   | 5.7   | 2.9   | 8.2   |
| 439128 | 5.9   | 8.2   | 6.8   | 10.7  |
| 439011 | 6.1   | 14.4  | 7.8   | 18    |
| 439001 | 7.3   | 15.3  | 6.6   | 15.5  |
| 438836 | 2.3   | 5.9   | 5.3   | 9     |
| 438993 | 11.9  | 32.1  | 15.1  | 39.5  |
| 439247 | 9.6   | 8.6   | 7.7   | 16.2  |
| 442634 | 1.8   | 1.8   | 5.6   | 6.2   |
| 441373 | 7.4   | 9.3   | 7.3   | 7.7   |
| 441771 | 9.8   | 15.9  | 9.6   | 14.2  |
| 448516 | 5.8   | 6.1   | 9.6   | 7.3   |
| 448826 |       | 1.7   | 2.2   | 2     |
| 448827 | 11.7  | 7     | 8     | 8.6   |
| 418357 | 10.1  | 11.7  | 10.3  | 14.5  |
| 446093 | 33.3  | 44.5  | 43.6  | 46.8  |
| 446111 | 18.1  | 23    | 21    | 21.6  |
| 418481 | 3.3   | 1.9   |       | 2.5   |
| 445906 | 51.9  | 59.9  | 64.7  | 78.3  |
| 445934 | 33.9  | 44.6  | 37.1  | 44.5  |
| 418816 |       | 2     | 1.9   | 2.7   |
| 418653 | 13.6  | 17.4  | 13.3  | 23.7  |
| 446261 | 74.5  | 94.6  | 84.9  | 106.8 |
| 446288 | 9.7   | 11.3  | 8.9   | 12.1  |
| 422073 | 86.1  | 89.6  | 140.2 | 103.1 |
| 419391 | 6     | 6.4   | 7.3   | 7.8   |
| 445649 | 112.3 | 151.8 | 191.6 | 195.1 |

|        |       |       |       |       |
|--------|-------|-------|-------|-------|
| 445723 | 74.4  | 96.1  | 97.9  | 104.3 |
| 445749 | 46    | 63    | 59.6  | 67    |
| 409852 | 9.1   | 11.9  | 7.7   | 10    |
| 409852 | 9.1   | 11.9  | 7.7   | 10    |
| 414264 | 22.4  | 21.3  | 20.5  | 29.2  |
| 415655 | 16    | 22    | 21.8  | 21.9  |
| 415493 | 59.5  | 71.7  | 54.5  | 68    |
| 415490 | 81.6  | 92.7  | 91.2  | 95.2  |
| 446443 | 48.4  | 54.4  | 78.5  | 66.4  |
| 325502 | 1.4   |       |       |       |
| 291053 | 6.6   | 3.1   | 5.2   | 5.3   |
| 290785 | 3.1   | 1.6   | 1.6   | 2.1   |
| 291433 | 8.5   | 3.2   | 6.6   | 7.3   |
| 291432 | 4.7   | 2.5   | 2     | 3.1   |
| 291335 | 1.6   | 2     | 2.5   | 2.7   |
| 334985 | 14.6  | 13.5  | 10.1  | 20.6  |
| 334980 | 96.3  | 120.2 | 80.5  | 153.3 |
| 464308 | 10.4  | 10.4  | 8.8   | 12.1  |
| 472528 | 11.3  | 9.2   | 9     | 12.5  |
| 469296 | 5.8   | 5.4   | 6.5   | 8.5   |
| 469964 | 11    | 11.1  | 7.6   | 11.6  |
| 311149 | 35.8  | 54.5  | 55.2  | 110.5 |
| 470657 | 7     | 4.9   | 7.7   | 8.5   |
| 470450 | 17.8  | 19.8  | 17.3  | 22.9  |
| 470302 | 44.2  | 50.2  | 47.1  | 53.7  |
| 470121 | 32.1  | 46.7  | 48.8  | 54.7  |
| 470168 | 53.3  | 69.2  | 63.2  | 75.2  |
| 470210 | 57.3  | 67.2  | 60    | 68.2  |
| 470266 | 19.5  | 25.2  | 18.7  | 26.3  |
| 470222 | 130.2 | 167.7 | 148.6 | 180.3 |
| 470243 | 48.4  | 62    | 61.8  | 66.7  |
| 470370 | 28.4  | 28.2  | 29    | 29.8  |
| 470382 | 6     | 10.5  | 8.7   | 8.4   |
| 470402 | 45.7  | 40.8  | 42.5  | 50.1  |
| 311252 | 45.1  | 54.4  | 75.9  | 48.3  |
| 311526 | 56.8  | 76.9  | 115.2 | 76.2  |
| 311471 | 27.2  | 26.2  | 35.6  | 26.4  |
| 470778 | 1.8   | 3.3   | 2.3   | 1.7   |
| 471093 | 11.4  | 14    | 12.8  | 10.4  |
| 308273 | 42.1  | 60.9  | 30.3  | 71.2  |
| 311604 | 23.1  | 20.1  | 21    | 24.1  |
| 311703 | 41.4  | 45.8  | 47.6  | 42.7  |
| 311703 | 41.4  | 45.8  | 47.6  | 42.7  |
| 316642 | 30.5  | 26.6  | 31.5  | 22.9  |
| 315293 | 2.2   |       | 5.8   | 2.9   |
| 315253 | 63.2  | 63.7  | 75.3  | 63.1  |
| 315490 | 10.5  | 7.9   | 11.3  | 7.9   |
| 314948 |       |       | 1.2   |       |
| 314806 | 10.7  | 8     | 9.4   | 9.5   |
| 315168 | 1.6   | 1.7   |       |       |
| 315135 | 22.8  | 24    | 29.8  | 23.3  |
| 315075 |       |       | 1.9   |       |



|        |       |       |       |       |
|--------|-------|-------|-------|-------|
| 316247 | 62.7  | 79.9  | 73.8  | 88.3  |
| 316111 | 83.2  | 102.1 | 86.5  | 101.2 |
| 316409 | 29.7  | 28.1  | 26.3  | 31.1  |
| 315609 | 71.7  | 85.5  | 70.1  | 93.2  |
| 315822 | 64    | 67.4  | 76.3  | 80.6  |
| 315976 | 17.7  | 25.9  | 23.1  | 29    |
| 315966 | 107.3 | 140.5 | 117.3 | 145.8 |
| 343506 | 17.7  | 18.8  | 23.3  | 18.6  |
| 347786 | 50.2  | 57    | 54.7  | 75.3  |
| 347918 | 52.5  | 84    | 79.8  | 82.4  |
| 348096 | 81.4  | 110.9 | 96.4  | 104.2 |
| 348736 | 29.8  | 41.3  | 36.7  | 33.3  |
| 348607 | 51    | 62.2  | 55.8  | 63.4  |
| 348956 | 10.9  | 8.2   | 6.2   | 7.3   |
| 348893 | 31.8  | 38.5  | 36.2  | 39.7  |
| 348256 | 26.7  | 34.2  | 29.2  | 28.9  |
| 348485 | 54.1  | 64    | 59.8  | 59.1  |
| 346167 | 56.2  | 79.7  | 77.4  | 75.5  |
| 339012 | 28.3  | 31.6  | 34.2  | 33.2  |
| 339137 | 56.9  | 67.3  | 59.1  | 66.4  |
| 339476 | 56.2  | 43    | 35.2  | 48    |
| 338775 | 220.6 | 345.8 | 351.2 | 380.2 |
| 338907 | 117.9 | 152.4 | 130.8 | 152.7 |
| 339919 | 46.6  | 47    | 43.9  | 51.7  |
| 337037 | 23    | 22.2  | 30.3  | 20.9  |
| 339629 | 42.3  | 43.2  | 28.8  | 55.1  |
| 250323 | 68.7  | 91.7  | 85.7  | 100.8 |
| 337920 | 75.1  | 67.3  | 60.5  | 71    |
| 351946 | 111.8 | 125   | 100.2 | 116.2 |
| 351943 | 96.7  | 112.2 | 106.4 | 120.7 |
| 338523 | 164   | 153   | 115.1 | 175.7 |
| 352042 | 10.4  | 15.2  | 11.3  | 16.8  |
| 351801 | 118.7 | 163.9 | 132.6 | 145.6 |
| 351798 | 186.2 | 233.5 | 235.3 | 247.8 |
| 340076 | 40.3  | 48.2  | 43.7  | 57.8  |
| 351105 | 14.4  | 14    | 12.6  | 14.8  |
| 342369 | 92.2  | 90.3  | 66.3  | 123.7 |
| 351447 | 23.5  | 23.8  | 17.5  | 22.6  |
| 340081 | 109.5 | 123   | 105.6 | 125.9 |
| 340227 | 20.9  | 24.4  | 18    | 23    |
| 340231 | 53    | 70.1  | 54.5  | 71.4  |
| 336851 | 73.8  | 85.7  | 110.5 | 85    |
| 336688 | 59.2  | 88.2  | 101.9 | 70.3  |
| 336712 | 34.4  | 46.7  | 74.9  | 43.8  |
| 336663 | 53.2  | 83.3  | 120.8 | 80.8  |
| 283352 | 57.9  | 67.9  | 58.7  | 78.2  |
| 352315 | 14.3  | 16.6  | 17.4  | 18.5  |
| 391292 | 3.3   | 2.1   | 3.1   | 2.2   |
| 318133 | 8.8   | 13.9  | 6.7   | 15.2  |
| 373528 | 10.4  | 12.7  | 16.9  | 18.8  |
| 424188 | 11.3  | 10.2  | 14.7  | 13.9  |
| 382241 | 2.9   | 2.9   | 3.5   | 7     |

|        |       |       |       |       |
|--------|-------|-------|-------|-------|
| 311021 | 18.7  | 21.8  | 26.8  | 23.2  |
| 362901 | 5.6   | 1.4   | 3.5   | 3.4   |
| 308337 | 125.4 | 165.8 | 98.9  | 219.1 |
| 354099 | 5.6   | 7.3   | 3.2   | 2.8   |
| 356068 | 7.1   | 6.8   | 8.8   | 10.9  |
| 291144 | 2.6   |       | 2.4   | 2.1   |
| 383526 | 30.1  | 36.8  | 37.9  | 39.2  |
| 338366 | 111.7 | 121   | 134.4 | 142.6 |
|        |       |       |       |       |
| 345848 | 69.3  | 78.7  | 70.5  | 61.6  |
| 345848 | 69.3  | 78.7  | 70.5  | 61.6  |
| 367127 |       | 2.3   |       | 2.3   |
| 292620 | 9.3   | 7.4   | 6.3   | 9.7   |
| 393113 | 11.2  | 13.2  | 11.5  | 10.7  |
| 448079 | 23    | 34    | 29.4  | 35    |
| 451463 | 7     | 2.3   | 6.8   | 3.3   |
| 369410 | 18.1  | 20.4  | 18    | 21.6  |
| 353963 | 163.5 | 209.3 | 177.3 | 176   |
| 341489 | 19.1  | 24.4  | 23.3  | 23.9  |
| 357409 | 1.2   | 1.6   |       |       |
| 346026 | 175.8 | 213.1 | 216   | 230.3 |
| 339412 | 28.6  | 25.3  | 28.5  | 29.5  |
| 396097 | 25.8  | 22.4  | 32.5  | 33.6  |
| 342261 | 39.3  | 35.2  | 32.6  | 52.8  |
| 340458 | 19.5  | 20.4  | 20.9  | 21.1  |
| 367210 | 1.9   | 2.2   | 1.9   | 1.6   |
| 250468 | 72.1  | 102.3 | 96.4  | 112.6 |
| 473395 | 6     | 9.5   | 3.2   | 9.9   |
| 352176 | 15.6  | 19.6  | 20.5  | 20.4  |
| 263347 | 41.3  | 47.2  | 42.2  | 57.4  |
| 442713 | 3.3   | 5.8   | 1.9   | 2.6   |
| 452730 | 15    | 12.2  | 10.7  | 15.6  |
| 363840 |       | 1.8   | 2.8   | 2.4   |
| 353926 | 148.1 | 188.3 | 195.7 | 197.9 |
| 350549 | 21.9  | 22.3  | 27.9  | 20.7  |
| 338179 | 38    | 27.8  | 25.2  | 42.7  |
| 250265 | 53.5  | 80.6  | 79.4  | 88.8  |
| 354184 | 30.1  | 32.4  | 41.7  | 38    |
| 339405 | 44.2  | 29.5  | 50.2  | 37.3  |
| 308504 | 33.7  | 34.5  | 27.5  | 49    |
| 355964 | 2.3   | 6     | 2.2   | 5.7   |
| 250575 | 93.5  | 114.5 | 103.1 | 112.8 |
| 250768 | 34.3  | 44.6  | 46.7  | 45.7  |
| 456496 | 19.2  | 17.4  | 17.2  | 19.9  |
| 415658 | 2.7   | 2.5   | 5.3   | 3     |
|        |       |       |       |       |
| 316123 | 18.3  | 25.5  | 23.6  | 27.2  |
| 381618 | 70.7  | 86.9  | 82.1  | 100.1 |
| 393449 | 48.3  | 59.6  | 60.1  | 65.7  |
| 315117 | 12.8  | 14    | 13.9  | 12.9  |
| 346569 | 93    | 103.8 | 100.7 | 96.7  |
| 250172 | 19.3  | 23.6  | 26.4  | 27    |

|        |       |       |       |       |
|--------|-------|-------|-------|-------|
| 447744 | 23.3  | 23.4  | 32.4  | 36.3  |
| 308850 | 108.1 | 126   | 95.9  | 120.3 |
|        |       |       |       |       |
| 449127 | 13.2  | 16.2  | 14.7  | 26.6  |
| 448921 | 16.6  | 13.6  | 15.8  | 20.9  |
| 370538 | 59.2  | 76.2  | 64.9  | 80.6  |
| 361451 |       |       | 1.3   | 1.8   |
| 443347 |       |       | 1.4   |       |
| 444011 | 1.6   | 3     | 2.7   | 3.2   |
| 390716 |       | 1.2   |       |       |
| 250956 | 12.7  | 12.9  | 13.1  | 15.5  |
|        |       |       |       |       |
| 443278 | 2.2   | 2.7   | 2.5   | 1.8   |
| 339680 | 51.2  | 55.9  | 69.8  | 73.3  |
| 315700 | 1.9   | 2.5   | 2.3   | 3.1   |
| 340338 | 9.6   | 8.6   | 8.5   | 10.1  |
|        |       |       |       |       |
|        |       |       |       |       |
| 354319 | 15.4  | 15.5  | 18.4  | 16.6  |
| 372154 | 42.1  | 32.5  | 34.1  | 67.3  |
| 348102 | 19.8  | 20.9  | 24.5  | 22.6  |
| 335351 | 119.4 | 196.4 | 232.2 | 229.6 |
| 306451 | 32    | 27.3  | 34.2  | 32.2  |
| 317985 | 14.3  | 15    | 16.4  | 15.9  |
| 408360 | 35.3  | 32    | 23.1  | 56    |
| 393554 | 40.5  | 59.8  | 63    | 60.7  |
| 402065 | 44.4  | 44.8  | 51.3  | 51.3  |
| 312417 | 24.2  | 18.1  | 6.9   | 6.8   |
|        |       |       |       |       |
| 470145 | 2.1   | 2.4   | 2     | 2.3   |
| 446528 | 13.5  | 11.8  | 10.2  | 16.3  |
| 450039 | 48.9  | 53.3  | 48.8  | 75.9  |
| 363580 | 2.6   | 2.8   | 2.3   | 4.7   |
| 315448 | 2.2   | 2.5   | 1.5   | 1.8   |
| 448061 | 11.7  | 16.2  | 19    | 26.4  |
| 388439 | 3.1   | 2.7   | 2.1   | 2.6   |
| 395706 | 55.4  | 53.9  | 43.3  | 57.6  |
| 322668 | 31.2  | 21.8  | 50.1  | 36.1  |
| 390880 | 6     | 8.2   | 7.2   | 10    |
| 471265 | 2.8   | 2.8   | 2.8   | 5     |
| 334455 | 40.3  | 58.4  | 86.5  | 52.3  |
| 425067 | 1.8   |       |       |       |
| 308756 | 138.8 | 163   | 122.2 | 166.3 |
| 336699 | 57.9  | 88.6  | 112.9 | 91.8  |
| 336518 | 80.4  | 81.8  | 79    | 69.9  |
| 423586 | 2.1   | 3.3   | 5.8   | 6     |
| 353830 | 22.5  | 20.1  | 16.8  | 19.6  |
| 349010 | 13.2  | 13.7  | 17.8  | 13.2  |
| 385137 | 3     | 2.9   | 2.7   | 3.3   |
| 335584 | 153.8 | 170.1 | 173.5 | 220   |
| 391141 | 2.1   | 6.1   | 6.2   | 6     |
| 388441 | 2     |       |       |       |

|        |       |       |       |       |
|--------|-------|-------|-------|-------|
| 350275 | 12.1  | 18.2  | 13.4  | 17.6  |
| 370534 | 284.4 | 330.7 | 277.2 | 330   |
| 352039 | 9.8   | 14.5  | 11.9  | 13.7  |
| 308443 | 187   | 255.7 | 264.9 | 309.4 |
| 340977 | 15.7  | 15.1  | 13.8  | 15.7  |
| 307516 | 14.5  | 15.2  | 19.3  | 24.9  |
| 448224 | 99.4  | 103.7 | 102.5 | 102.5 |
| 423811 | 62.5  | 64.8  | 62.4  | 69.3  |
| 438423 | 3     | 5.6   | 5.3   | 6.1   |
| 391231 | 1.6   | 1.4   | 2.5   | 2.5   |
| 440398 | 1.4   | 1.4   | 1.4   | 1.9   |
| 434554 | 15.9  | 14.1  | 8.3   | 13    |
| 305835 | 12    | 13.5  | 13.7  | 14.2  |
| 393867 | 59.6  | 52.1  | 58.8  | 48.7  |
| 439611 | 1.9   | 1.6   | 1.9   | 1.6   |
| 469154 | 12.9  | 10.2  | 11.4  | 12.9  |
| 404853 | 18.9  | 20.9  | 19.6  | 22.7  |
| 414414 | 8.3   | 6.7   | 6.5   | 6.8   |
| 415359 | 3.2   | 2.5   | 5.4   | 3.1   |
| 318616 | 49.7  | 39.2  | 46.8  | 38    |
| 442114 |       |       | 1.7   |       |
| 309353 | 82.6  | 84.2  | 63.3  | 94.6  |
| 349587 | 42.5  | 59.9  | 64.9  | 65    |
| 283256 | 124.7 | 159.1 | 148   | 160.3 |
| 419925 | 2.2   | 1.5   | 3.2   | 2     |
| 370082 | 96.1  | 107.4 | 100.5 | 118   |
| 448778 | 5.6   | 3.2   | 8.1   | 8.3   |
| 372655 | 55.1  | 48.1  | 33.7  | 49.1  |
| 260890 | 36.5  | 37    | 54.4  | 39.5  |
| 440989 | 9.5   | 8.9   | 6.3   | 6.8   |
| 250388 | 65.1  | 92.9  | 88.8  | 98.9  |
| 442911 | 3.3   | 3.2   | 3.5   | 5.5   |
| 308241 | 35.6  | 36.9  | 31.4  | 45.8  |
| 315876 | 9.6   | 10.7  | 8.3   | 9.6   |
| 318797 | 1.7   | 1.9   | 1.8   |       |
| 448714 | 30.6  | 21.1  | 27.6  | 23.2  |
| 366422 | 3.2   | 7.4   | 7.1   | 6.7   |
| 365614 |       | 1.7   |       |       |
| 384202 | 10.5  | 11.1  | 6.3   | 9.7   |
| 393740 | 28.7  | 31.6  | 32.1  | 31.6  |
| 356580 | 2.8   | 5.5   | 3.1   | 2.9   |
| 339620 | 16.6  | 21.7  | 19.1  | 21.5  |
| 247687 | 2.9   |       |       | 6.3   |
| 405000 | 8     | 8.5   | 7.5   | 9     |
| 423821 | 17.3  | 19.6  | 17.2  | 19.9  |
| 308660 | 45.5  | 47.7  | 36.4  | 58.4  |
| 453151 | 15.4  | 15.2  | 13.8  | 14.3  |
| 469841 | 9.2   | 7.2   | 11.1  | 8.2   |
| 448005 | 8.7   | 11.5  | 12.2  | 24.7  |
| 448005 | 8.7   | 11.5  | 12.2  | 24.7  |
| 346436 | 108.4 | 111.7 | 118.4 | 131.9 |
| 342259 | 75.8  | 67.9  | 64.2  | 59.4  |

|        |       |       |       |       |
|--------|-------|-------|-------|-------|
| 307961 | 15.1  | 19.4  | 17.2  | 18    |
| 438021 | 3     | 2.3   | 2.9   | 2.3   |
| 438021 | 3     | 2.3   | 2.9   | 2.3   |
| 447851 | 5.9   | 7.3   | 7.8   | 9.1   |
| 311085 | 56.1  | 74.7  | 65.6  | 98.9  |
| 321173 | 1.4   |       | 1.4   |       |
| 351972 | 12    | 10.5  | 9.1   | 11.9  |
| 470644 | 1.4   | 2.3   | 2.9   | 1.7   |
|        |       |       |       |       |
| 404856 | 6.9   | 7     | 9.2   | 12.9  |
| 445572 |       | 2.2   | 1.7   | 2.3   |
| 345936 | 21.2  | 18    | 17.7  | 16.7  |
| 345936 | 21.2  | 18    | 17.7  | 16.7  |
| 444411 | 8.4   | 12.9  | 14.9  | 11.3  |
| 335597 | 317.7 | 312.2 | 246.9 | 341.1 |
| 434838 | 11.4  | 11.5  | 12.1  | 12.3  |
| 423721 | 18.8  | 20.4  | 17.2  | 22.4  |
| 440496 | 1.5   | 2.3   | 2.2   | 2.4   |
| 390009 | 7.1   | 7.1   | 8.1   | 6.7   |
| 423736 | 16.6  | 19.3  | 20.6  | 22.6  |
| 385126 | 3.1   | 8     | 2.6   | 6.3   |
| 308662 | 214   | 253.6 | 177.5 | 242.7 |
| 467073 |       | 1.5   |       | 1.9   |
| 448064 | 2.8   | 2.7   | 3.3   | 10.5  |
| 454170 |       | 1.9   | 2.7   |       |
| 361448 |       |       |       | 1.6   |
| 473763 | 33.8  | 31.3  | 36.3  | 39.8  |
| 393434 | 114.1 | 99.7  | 107.3 | 104.2 |
| 263462 | 28.8  | 29.5  | 25.7  | 31.1  |
| 348211 | 24.6  | 27.6  | 20    | 24.1  |
| 393731 | 135.5 | 128.5 | 138.7 | 134.3 |
| 404326 | 2.4   | 5.6   | 6.7   | 9.8   |
| 308545 | 70.9  | 92.5  | 74.7  | 103.9 |
| 441885 | 3.2   | 2.5   | 2.5   | 6.2   |
| 405123 | 2.4   | 1.8   | 2.5   | 2.7   |
| 451368 | 18.9  | 16.2  | 15.1  | 16.9  |
| 308388 | 15.4  | 21    | 13.9  | 25.9  |
| 322228 | 5.4   | 5.3   | 5.7   | 5.7   |
| 380300 | 22.8  | 21    | 16.4  | 19    |
| 352172 | 7.8   | 8.7   | 8.5   | 7.6   |
| 418140 | 1.4   | 1.9   | 2.8   |       |
| 448779 | 17.7  | 14.3  | 14    | 15.2  |
| 448779 | 17.7  | 14.3  | 14    | 15.2  |
| 281174 | 47    | 68    | 64.6  | 53.3  |
| 334185 | 104.7 | 96.3  | 95.2  | 106.2 |
|        |       |       |       |       |
|        |       |       |       |       |
| 341210 | 9.2   | 8.5   | 8.9   | 9.4   |
|        |       |       |       |       |
| 405001 | 2.5   | 8.5   | 9.3   | 12.1  |
| 318775 | 2.5   | 1.6   | 2.1   | 1.9   |
| 309289 | 58.6  | 64.4  | 77.9  | 56.6  |

|        |      |      |       |      |
|--------|------|------|-------|------|
| 355476 | 2.2  | 8.5  | 5.8   | 11.7 |
| 339997 | 46.5 | 30.2 | 40    | 35.8 |
| 470925 |      |      | 1.5   |      |
| 382526 | 3.1  | 3.1  | 3.2   | 3.4  |
| 282534 | 17.1 | 17.6 | 17.1  | 23.4 |
| 444306 | 1.4  | 1.5  | 1.9   | 2.5  |
| 291336 | 5    | 4.6  | 1.9   | 2.3  |
| 346442 | 5.3  | 6.1  | 6     | 6    |
| 396096 |      | 1.7  |       |      |
| 306259 | 30.3 | 51.4 | 105.2 | 45   |
| 382435 | 9    | 2.5  | 6.7   | 5.3  |
| 451627 | 36.7 | 29.2 | 41.7  | 22.1 |
| 451606 | 26.5 | 28.4 | 23.8  | 31.6 |
| 451490 | 12.1 | 12.5 | 16.1  | 12.8 |
| 451516 | 60.4 | 45.3 | 54.7  | 43.6 |
| 452887 | 6.5  | 7    | 9.4   | 11.8 |
| 452948 | 55.3 | 49.7 | 46.3  | 46.2 |
| 380695 | 91.3 | 70.3 | 67.3  | 71.6 |
| 449948 | 28.6 | 23.3 | 33.7  | 20.5 |
| 449346 | 9.7  | 10.3 | 12.8  | 10.1 |
| 398920 | 47.3 | 53.9 | 72.1  | 66.5 |
| 388020 | 2.4  | 2.3  |       | 2.3  |
| 387957 | 3.3  |      |       | 1.6  |
| 389009 |      |      |       | 1.8  |
| 388999 | 2.5  | 2    | 2.9   | 2.3  |
| 393567 | 16.6 | 21.1 | 18.7  | 14.2 |
|        |      |      |       |      |
| 362877 | 3.1  | 2.2  | 1.9   | 3    |
| 362769 | 6.9  | 6.4  | 6.5   | 2.8  |
| 362674 | 2    | 2.9  | 3.2   |      |
| 362645 | 1.8  | 1.4  | 2.3   | 2.2  |
| 362628 | 13.7 | 13.9 | 14.4  | 11.7 |
| 362527 | 7.9  | 8    | 7.8   | 6.4  |
| 362509 | 18.4 | 17.4 | 18.7  | 17.1 |
| 362388 | 10   | 9.5  | 8     | 7.4  |
| 363277 | 5.4  | 4.9  | 6.1   | 6    |
| 363238 |      |      | 1.6   | 1.8  |
| 363175 | 2    | 1.8  | 2.6   | 5.4  |
| 362367 | 10.3 | 10.8 | 9.3   | 9    |
|        |      |      |       |      |
|        |      |      |       |      |
|        |      |      |       |      |
|        |      |      |       |      |
| 360400 | 14.7 | 14.9 | 18.1  | 10.4 |
| 360387 | 1.9  |      |       | 1.4  |
| 360357 | 9.9  | 8.2  | 9.9   | 8.5  |
| 360278 | 5.5  | 5.2  | 6     | 5.1  |
| 360238 | 8    | 6.2  | 7.2   | 5.9  |
| 363859 |      |      | 1.4   | 1.8  |
| 363626 | 2    |      | 2     | 1.4  |
| 364257 | 1.9  | 1.3  | 1.7   |      |
| 360128 | 15.3 | 15.8 | 18.3  | 14.2 |

|        |       |       |       |       |
|--------|-------|-------|-------|-------|
| 360088 | 10.5  | 11.4  | 12.5  | 12.5  |
| 353316 |       |       |       | 1.6   |
| 353414 | 14.3  | 16.5  | 10.5  | 15.9  |
| 353518 | 2.2   | 2.2   | 2     | 2.1   |
| 359965 | 5.4   | 2.2   | 3.3   | 3.2   |
| 359919 | 13.9  | 16.4  | 13.1  | 10.8  |
| 359126 | 2     | 1.5   | 2.1   |       |
| 454274 | 96.8  | 67.4  | 68    | 73.6  |
| 453472 | 110.2 | 100.5 | 94.7  | 89    |
| 453688 | 90.8  | 90.7  | 110.6 | 88.3  |
| 453550 | 74.8  | 80.4  | 102.3 | 75.7  |
| 453555 | 60    | 66    | 87.2  | 69.5  |
| 370280 | 17.2  | 16.5  | 16.3  | 19.3  |
| 399023 | 126   | 92.4  | 95.8  | 77    |
| 399032 | 35.5  | 28.6  | 23.5  | 22    |
| 428686 | 17.7  | 17.5  | 16.8  | 14.6  |
| 428636 | 33.4  | 34    | 44.9  | 19.3  |
| 428617 | 59.1  | 46.6  | 42.1  | 43    |
| 428608 | 60.8  | 57.1  | 47.4  | 61    |
| 428725 | 23.4  | 24.4  | 25.5  | 16.5  |
| 428501 | 61.4  | 55.2  | 38.9  | 40.6  |
| 428474 | 51.3  | 47.8  | 44.8  | 40.4  |
| 428446 | 49.1  | 69.9  | 117.4 | 27.9  |
| 428535 | 77.7  | 102.1 | 151.4 | 45.9  |
| 428433 | 108.3 | 98.3  | 87    | 93.7  |
| 429113 | 23    | 15.9  | 20.9  | 15.8  |
| 427594 | 42.9  | 40.1  | 40    | 34.2  |
| 428401 | 73.4  | 76.9  | 74.6  | 91.5  |
| 428282 | 97.8  | 83.8  | 116.3 | 82.2  |
| 430230 | 34.9  | 46.3  | 29    | 28.5  |
| 430323 | 155.7 | 126.6 | 124.5 | 126   |
| 430339 | 72.2  | 48.2  | 50.7  | 58.2  |
| 430593 | 46.9  | 34.7  | 30.3  | 36.2  |
| 430508 | 100.5 | 77.3  | 66.2  | 80.7  |
| 430430 | 32.1  | 25.1  | 24.1  | 27.3  |
| 430415 | 179.1 | 135.4 | 115.4 | 134.3 |
| 444967 | 16.1  | 22.3  | 24.4  | 26.6  |
| 425592 | 75.2  | 68    | 60.5  | 64.8  |
| 425531 | 168.6 | 164.5 | 156.2 | 154.2 |
| 444891 | 2     | 1.4   | 1.8   | 2     |
| 444835 | 29.4  | 36.5  | 40    | 55.6  |
| 432606 | 26.9  | 19.5  | 18.2  | 22.2  |
| 432592 | 8.9   | 9.9   | 5.7   | 8     |
| 447166 | 11.4  | 9.5   | 12.1  | 8.7   |
| 447178 | 5.1   | 3.3   | 6.3   | 3     |
| 400418 | 56.1  | 73.3  | 117.6 | 45.4  |
| 448691 |       | 1.8   | 2.5   |       |
| 403059 | 107.4 | 83.7  | 69.7  | 82    |
| 323978 | 63.7  | 55.7  | 63.3  | 62.3  |
| 323969 | 21.9  | 19.5  | 25.6  | 28.1  |
| 323806 | 12.9  | 18.6  | 21    | 16.7  |
| 323988 | 5.6   | 2.6   | 2.9   | 2.8   |

|        |       |       |       |       |
|--------|-------|-------|-------|-------|
| 324091 | 1.8   |       | 1.7   | 1.4   |
| 323280 | 16.8  | 11.7  | 15.5  | 12.6  |
| 466690 | 32.9  | 20.6  | 31.8  | 16.6  |
| 328523 | 43    | 42.5  | 50.1  | 42.7  |
| 328497 | 10.2  | 10    | 10.1  | 9.7   |
| 328404 | 29.2  | 30.8  | 35.1  | 31.2  |
| 328280 | 3.1   | 6.3   | 5.2   | 6.5   |
| 327692 | 12.7  | 12    | 10.7  | 12.1  |
| 328624 | 12.4  | 9.5   | 11.7  | 8.1   |
| 328655 | 43.7  | 41.9  | 48.5  | 45.8  |
| 332270 | 8.2   | 9     | 9.8   | 6.2   |
| 332171 | 3.2   | 5.4   | 3.2   | 5.8   |
| 332092 | 3.2   | 6.2   | 2.8   | 2.7   |
| 332035 | 2.4   | 2.5   | 3.1   | 2     |
| 329102 | 1.8   | 2.6   | 3     |       |
| 328963 | 1.4   | 1.6   | 1.6   | 1.6   |
| 328879 | 7.3   | 5.9   | 7.5   | 4.9   |
| 328856 | 2.3   | 2.1   | 1.5   |       |
| 328769 | 21.2  | 18.7  | 27.4  | 17.8  |
| 468711 | 2.3   | 5.8   | 6.8   | 3.1   |
| 301510 | 11.3  | 13    | 12.4  | 13.3  |
| 301530 |       |       | 3     | 2.6   |
| 301567 | 1.6   |       | 1.8   |       |
| 468476 | 11.2  | 12.1  | 11.7  | 13.7  |
| 468607 | 14.3  | 14.8  | 15.7  | 12.8  |
| 309059 | 28.7  | 24.4  | 30.3  | 21.7  |
| 309134 | 176.7 | 161.7 | 172.4 | 151.8 |
| 307379 | 16.8  | 24.5  | 34.3  | 21.9  |
| 467631 | 6     | 7.4   | 7.9   | 7.3   |
| 317801 | 6.5   | 6.1   | 9.2   | 3.1   |
| 318050 | 2.9   | 5.9   | 6.3   | 7.3   |
| 317925 | 2.3   | 2.2   | 5.7   | 1.5   |
| 468301 | 1.5   | 2.4   | 2.5   | 1.7   |
| 468439 | 19.1  | 19    | 16.4  | 17.1  |
| 315991 | 114.7 | 80.7  | 68.5  | 85.4  |
| 315847 | 21.3  | 23.3  | 28.5  | 26.6  |
| 266018 | 43.9  | 32.3  | 31.1  | 28.7  |
| 460369 | 55.4  | 47.2  | 53.5  | 51.9  |
| 460372 | 54    | 48.7  | 47.1  | 45.2  |
| 460033 | 26    | 19.3  | 20.3  | 16.1  |
| 350066 | 34.3  | 26.6  | 29.8  | 31.6  |
| 350211 | 32.6  | 29.3  | 32.8  | 35.6  |
| 460136 | 40.7  | 31.9  | 40    | 25.4  |
| 460136 | 40.7  | 31.9  | 40    | 25.4  |
| 460033 | 26    | 19.3  | 20.3  | 16.1  |
| 460609 | 43.1  | 32.3  | 36.1  | 32.3  |
| 460617 | 14.8  | 13.9  | 15.1  | 11.4  |
| 251470 | 28.4  | 28.7  | 28.8  | 24.9  |
| 475174 | 37.3  | 43.6  | 40.1  | 50.8  |
| 460511 | 50.6  | 46.9  | 46.6  | 46.3  |
| 460515 | 36.2  | 31.5  | 29    | 26.8  |
| 475371 | 18.9  | 29.3  | 28.9  | 28.7  |



|        |       |       |       |       |
|--------|-------|-------|-------|-------|
| 349887 | 165.5 | 123.9 | 147.4 | 127.9 |
| 459906 | 30.7  | 22.4  | 31.9  | 22.4  |
| 459791 | 12    | 7.5   | 8.3   | 11.5  |
| 459906 | 30.7  | 22.4  | 31.9  | 22.4  |
| 254395 | 10.9  | 7.7   | 6.1   | 9.9   |
| 349721 | 27.7  | 41.1  | 55.7  | 40.6  |
| 254335 | 26.1  | 19.1  | 19.9  | 21.4  |
| 339314 | 40.5  | 36.8  | 35.3  | 34.1  |
| 340014 | 97.1  | 121.2 | 128.9 | 121.3 |
| 341372 | 29.2  | 34.1  | 39.5  | 29.9  |
| 341367 | 34.6  | 35.6  | 52.9  | 40.8  |
| 341504 | 18.8  | 15.9  | 22.7  | 18.7  |
| 251361 | 97    | 80.7  | 92.3  | 85.6  |
| 340164 | 22.5  | 17.8  | 19.2  | 15.2  |
| 340167 | 32.1  | 25.1  | 23.3  | 23.4  |
| 271242 | 2.8   | 2.9   | 3.1   | 1.7   |
|        |       |       |       |       |
| 400314 | 41.7  | 48.5  | 66.2  | 37.7  |
| 376891 | 64.9  | 49.9  | 54    | 50.6  |
| 309050 | 194.6 | 164.8 | 156.4 | 137.2 |
| 328359 | 5.9   | 6.9   | 5.9   | 5     |
| 449893 | 68.6  | 45.5  | 45.1  | 62.1  |
| 363405 | 2.2   | 2     | 2     |       |
| 452987 | 7.3   | 6.4   | 8.5   | 7.4   |
| 452160 | 98.7  | 63.6  | 56.2  | 48.8  |
| 423707 | 30.7  | 32.1  | 32    | 35.1  |
| 265793 | 71.5  | 59.6  | 67.8  | 66.7  |
| 307474 | 116   | 92.4  | 96.3  | 95.6  |
| 251263 | 7.6   | 5.8   | 9.8   | 6.3   |
| 380598 | 43    | 35.4  | 31.8  | 36    |
| 339057 | 14.3  | 11.5  | 13.5  | 16.6  |
| 363961 | 1.9   | 3.2   | 1.7   | 2.6   |
| 394387 | 11.1  | 12.6  | 13.9  | 13.1  |
| 370992 | 27.7  | 21.4  | 24.5  | 25.9  |
| 453661 | 5.5   | 8.1   | 10.1  | 7.7   |
| 468591 | 5.2   | 2.1   | 2.6   | 3.1   |
| 363333 | 2.7   | 2.3   | 2.8   | 3.3   |
| 364360 | 1.5   | 1.8   |       |       |
| 251374 | 31.9  | 25.1  | 25.6  | 25.5  |
| 423825 | 80    | 66.8  | 75.1  | 66.6  |
| 448457 | 2.5   | 3.3   | 5.6   | 6.2   |
| 448690 | 11.2  | 9.9   | 11.5  | 12.5  |
| 339194 | 94.3  | 98.9  | 123   | 122.7 |
| 428362 | 229.1 | 199.6 | 266.2 | 163.3 |
| 307661 | 141.3 | 119   | 133.2 | 125.7 |
| 328171 | 1.4   | 1.4   | 1.3   | 1.7   |
| 424055 | 6.8   | 3     | 6.1   | 5.9   |
| 265928 | 81.5  | 73.8  | 82.2  | 79    |
| 265697 | 102.6 | 91.9  | 97.3  | 97.1  |
| 452859 | 11.5  | 9.3   | 10.5  | 11.6  |
| 340287 | 10.4  | 9.9   | 8.4   | 9.8   |
| 428753 | 33.1  | 27.9  | 32.5  | 29.3  |

|        |       |       |       |       |
|--------|-------|-------|-------|-------|
| 402325 | 9.1   | 9     | 12.1  | 9.1   |
| 336224 | 280   | 246.8 | 279.2 | 284.3 |
| 449585 | 61.4  | 56.9  | 51.8  | 52.8  |
| 307085 | 135.6 | 134.9 | 133.3 | 146   |
| 452769 | 16.1  | 10.7  | 17.9  | 16.6  |
| 307565 | 70.4  | 60.8  | 65.8  | 60.7  |
| 309334 | 82.2  | 70.7  | 79.7  | 83.6  |
| 402464 | 19.7  | 15.7  | 22.8  | 14.3  |
| 308940 | 166.3 | 172.1 | 198.2 | 196.1 |
| 363042 |       | 2.7   | 1.6   | 1.4   |
| 343931 | 41.6  | 32.9  | 44.4  | 36.2  |
| 328987 | 9.4   | 12.6  | 9.2   | 10.8  |
| 400528 | 120.2 | 152.8 | 83.8  | 139.7 |
| 309227 | 190.8 | 164.3 | 182.5 | 188.5 |
| 428335 | 263.8 | 222.6 | 162.6 | 239.6 |
| 466548 | 5.6   | 5     | 2.8   | 3.3   |
| 352768 | 1.5   |       | 1.9   | 1.5   |
| 398931 | 20.1  | 23.7  | 29.5  | 23    |
| 424825 | 10.9  | 9.1   | 13.1  | 9.8   |
| 335340 | 260.3 | 253.1 | 207.5 | 306.3 |
| 425535 | 124   | 127.9 | 124.6 | 138.5 |
| 323695 | 1.6   |       | 1.5   |       |
| 347451 | 20.4  | 19.1  | 18.3  | 17.8  |
| 328232 | 1.5   |       |       |       |
| 395244 | 25.8  | 23.7  | 27.4  | 25.1  |
| 265584 | 13.6  | 17.1  | 18.2  | 23.7  |
| 393763 | 92.6  | 92.5  | 82.9  | 88.1  |
| 331974 | 3.3   | 3.2   | 2.3   |       |
| 309625 | 19.3  | 21.3  | 20    | 20.6  |
|        |       |       |       |       |
| 402929 | 13.7  | 10.4  | 11.9  | 16    |
| 402328 | 1.8   |       | 3.1   | 1.9   |
| 370976 | 173.6 | 96.5  | 122.1 | 101.3 |
| 448486 | 8.2   | 2.9   | 6.5   | 7.7   |
| 285163 | 33    | 24.3  | 34.5  | 22    |
| 325039 | 3.4   | 1.9   | 2.2   | 3.3   |
|        |       |       |       |       |
| 346822 | 14.5  | 15.6  | 19.1  | 13.7  |
|        |       |       |       |       |
| 362787 | 2.3   | 2.7   |       | 1.8   |
| 311630 | 14.2  | 11    | 18.2  | 14.1  |
| 423995 | 64.7  | 60.6  | 54.7  | 62.2  |
| 375059 | 44.8  | 47.3  | 49.9  | 51    |
| 370238 | 175.4 | 103.2 | 119.8 | 118.1 |
|        |       |       |       |       |
| 306150 | 59.2  | 50.1  | 74    | 59.3  |
| 298662 | 24.3  | 23.7  | 28.1  | 23.1  |
| 395904 | 33.8  | 31.5  | 26.9  | 26.5  |
| 395904 | 33.8  | 31.5  | 26.9  | 26.5  |
| 324441 | 6     | 1.5   | 2.5   | 2.1   |
| 313530 | 50.3  | 34.3  | 48.9  | 34.4  |
| 452790 | 4.9   | 2.7   | 2.4   | 2.8   |

|        |       |       |       |       |
|--------|-------|-------|-------|-------|
| 396501 | 24.3  | 17.7  | 19.4  | 21.8  |
| 339505 | 12.4  | 11.1  | 11.1  | 10.2  |
| 388074 | 2     |       | 2.4   |       |
| 254292 | 12.6  | 12.7  | 16.2  | 16.2  |
| 349901 | 14.9  | 12.8  | 10    | 10.4  |
| 377443 | 29.3  | 22.1  | 22.6  | 25.5  |
| 363443 | 5.7   | 6     | 2.8   | 8     |
| 283762 | 8.8   | 8.6   | 13.5  | 9.3   |
| 307414 | 234.7 | 214.9 | 194.1 | 171.6 |
| 249633 | 7.5   | 5.7   | 5.7   | 5.6   |
| 394111 | 83.8  | 82.4  | 64.7  | 80.8  |
| 373935 | 35.7  | 31    | 30.4  | 37.4  |
| 376259 | 37.7  | 32.9  | 34.9  | 32    |
| 432532 | 9.4   | 9.5   | 10.7  | 7.4   |
| 448237 | 32.4  | 34.1  | 36.3  | 32.8  |
| 311176 | 22.5  | 18.1  | 22.1  | 17.6  |
| 311491 | 22.4  | 15.9  | 24.7  | 21.7  |
| 347195 | 16.5  | 11.9  | 9.7   | 8.5   |
| 343779 | 289.6 | 200.3 | 212.5 | 205.5 |
| 432512 | 2.8   | 2.4   | 3.2   | 2     |
| 309729 | 41.1  | 37.5  | 39.6  | 45.1  |
| 311298 | 17.8  | 14.9  | 17.5  | 17.5  |
| 284284 | 47.6  | 38.5  | 48.5  | 50.9  |
| 423745 | 46.5  | 34.9  | 37.2  | 38.3  |
| 423745 | 46.5  | 34.9  | 37.2  | 38.3  |
| 313471 | 48.6  | 38    | 48.5  | 44.5  |
| 426060 | 59    | 34    | 62.3  | 48.1  |
| 447045 | 2.6   |       |       | 1.7   |
|        |       |       |       |       |
| 380062 | 16.8  | 15.7  | 18.3  | 18.3  |
| 271389 | 1.3   | 2.9   | 2.9   | 2.9   |
| 339504 | 8.7   | 3.3   | 5     | 7.4   |
| 310558 | 23.9  | 22.8  | 31.2  | 21.5  |
| 265711 | 121.3 | 114.5 | 111.7 | 111.4 |
| 379300 | 22.3  | 16.4  | 24.1  | 17.7  |
|        |       |       |       |       |
| 453928 | 41.2  | 43.1  | 47    | 48.3  |
| 425488 | 28.9  | 34.3  | 41.9  | 40.9  |
| 382940 | 3.3   | 3.3   | 3.5   | 2.6   |
| 281277 | 40.1  | 41.9  | 50.8  | 44.8  |
|        |       |       |       |       |
| 426000 | 11.9  | 11.6  | 12.6  | 15    |
|        |       |       |       |       |
| 310252 | 61.9  | 59.9  | 71.9  | 59.3  |
|        |       |       |       |       |
| 428663 | 69.2  | 60.8  | 73    | 57.1  |
| 398943 | 14.5  | 15.6  | 18.2  | 18.3  |
| 460824 | 8.9   | 6.8   | 5.9   | 7     |
| 328484 | 2.3   | 2.7   | 2.5   | 6.4   |
| 453607 | 20.9  | 20.5  | 22.7  | 17.5  |
| 254248 | 7     | 7.9   | 3.1   | 8.1   |
| 265823 | 129   | 109.4 | 125.2 | 122.5 |

|        |      |       |      |       |
|--------|------|-------|------|-------|
| 313140 | 35.8 | 34.4  | 31.8 | 30    |
|        |      |       |      |       |
| 380941 | 64   | 133.7 | 84.4 | 128.3 |
| 381111 | 32.6 | 37.1  | 26.7 | 31.5  |
| 381046 | 25.2 | 59.4  | 36.3 | 56    |
| 381016 | 22.7 | 45.3  | 28.3 | 39.8  |
| 395539 | 18.4 | 26.6  | 22.4 | 26.5  |
| 394147 |      | 1.8   | 1.5  | 2     |
| 457821 | 8.9  | 29    | 15.9 | 25.6  |
| 455620 | 19.6 | 23.1  | 16.1 | 30.1  |
| 367845 | 17.2 | 41.9  | 21.4 | 40.5  |
| 367831 | 23.5 | 53    | 29.7 | 50.4  |
| 367685 | 52.1 | 82.7  | 53.4 | 85.1  |
| 372893 | 54.8 | 110.9 | 56.8 | 94    |
| 372906 | 46.9 | 92.6  | 52   | 76.7  |
| 373474 | 62.8 | 73.5  | 60.5 | 68.4  |
| 373094 | 13.7 | 22.5  | 20.4 | 17.1  |
| 373011 | 17.5 | 19.1  | 16.2 | 19.1  |
| 428497 | 20.6 | 23.6  | 19.5 | 27.3  |
| 428415 | 34.2 | 41.3  | 31.9 | 54.2  |
| 428414 | 40.1 | 76.1  | 39.1 | 89.8  |
| 428305 | 15.7 | 27.4  | 15.6 | 36.3  |
| 423962 | 1.7  |       |      |       |
| 435237 | 14.5 | 25.3  | 12   | 27.1  |
| 431519 | 48.8 | 129.4 | 70.4 | 123.5 |
| 431411 | 24.8 | 28    | 25.2 | 31.5  |
| 431367 | 17   | 29.2  | 31.4 | 19.3  |
| 431465 | 34.4 | 88.7  | 53   | 88    |
| 431652 | 39.9 | 59.4  | 44.3 | 58.2  |
| 433802 | 11.4 | 19.9  | 11   | 17.5  |
| 405830 | 63.4 | 72.5  | 70.3 | 71.9  |
| 405797 | 12.4 | 15.3  | 16.5 | 12.9  |
| 405969 | 32.8 | 72.6  | 65.8 | 69.2  |
| 404255 | 13.6 | 20.9  | 27.9 | 15.9  |
| 400342 | 5.1  | 10    | 6.6  | 10.9  |
| 448589 | 6.2  | 5.7   | 6.4  | 3     |
| 400632 | 20.3 | 14.5  | 17.4 | 18.9  |
| 403793 | 12.9 | 13.4  | 9.9  | 17.7  |
|        |      |       |      |       |
| 448256 | 9.8  | 11.2  | 12.3 | 8.7   |
| 410941 | 23.2 | 57.3  | 36.8 | 54    |
| 411110 | 28.7 | 57.3  | 41.3 | 55    |
| 411357 | 14.7 | 13    | 16.5 | 17.6  |
| 287408 | 32.9 | 22.8  | 29.7 | 30.3  |
| 287422 | 24.1 | 71.7  | 40.9 | 74    |
| 287527 | 27.6 | 60.6  | 34   | 52.3  |
| 287540 | 22.8 | 47.5  | 24.2 | 49.2  |
| 291453 | 2.2  | 3     | 6.6  | 6.9   |
| 320738 | 17   | 27.4  | 14.8 | 27.1  |
| 320593 | 52.8 | 51.6  | 43.4 | 54.9  |
| 320561 | 20.1 | 55.5  | 50.4 | 64.7  |
| 322284 | 48.7 | 94.6  | 60.9 | 93.9  |

|        |       |       |       |       |
|--------|-------|-------|-------|-------|
| 284293 | 44.5  | 98.7  | 66.1  | 99.2  |
| 284367 | 98.3  | 204.3 | 109.3 | 177.8 |
| 284397 | 6.8   | 13.8  | 10    | 13.7  |
| 284458 | 34.7  | 49.2  | 38.6  | 49    |
| 282932 | 89.4  | 138.2 | 67.6  | 107.5 |
| 314006 | 27.8  | 66.4  | 41    | 60.6  |
| 314153 | 46.9  | 75.1  | 45    | 72.3  |
| 314072 | 38.9  | 69.7  | 43.3  | 62.6  |
| 306595 | 76.8  | 110.3 | 96.1  | 130.8 |
| 317283 | 2     |       | 1.8   |       |
| 315402 | 83.5  | 170.9 | 105.1 | 180   |
| 316428 | 37.6  | 69.3  | 36.3  | 64.5  |
| 316424 | 13.1  | 25.3  | 12.9  | 22.6  |
| 316266 | 30.3  | 75.8  | 61.1  | 82.2  |
| 350231 | 6.9   | 16.3  | 11.8  | 17.2  |
| 265808 | 7.2   | 2.8   | 8.3   | 5.5   |
| 265947 | 5.2   | 2.2   | 3.2   | 2.4   |
| 345165 | 27.4  | 63.3  | 41.4  | 63.8  |
|        |       |       |       |       |
| 345026 | 13.1  | 22.9  | 14.6  | 27.1  |
| 350220 | 18.4  | 41.8  | 30.1  | 45.5  |
| 350105 | 72.5  | 140.6 | 92    | 148.8 |
| 458135 | 134.7 | 117.1 | 82.2  | 118.3 |
| 267170 | 8.3   | 8.2   | 8     | 6.7   |
| 458248 | 32.4  | 54.5  | 35.3  | 49.5  |
| 346368 | 70.4  | 148.3 | 90.5  | 146.3 |
| 346559 | 120   | 269.5 | 143.7 | 237.1 |
| 457988 | 28.5  | 64.9  | 31.1  | 57.2  |
| 457987 | 54.5  | 54.7  | 35    | 49.5  |
| 338462 | 55.9  | 71.8  | 28.2  | 49.1  |
| 341363 | 25.6  | 54.3  | 36.2  | 128.3 |
| 340516 | 16.9  | 25.7  | 18    | 26.7  |
| 284171 | 5.5   | 10.7  | 9.2   | 12.7  |
| 285002 | 27.3  | 34.9  | 29.2  | 32.8  |
| 350074 | 7.2   | 11    | 12.1  | 12    |
| 399472 | 50.4  | 53.1  | 26    | 43    |
| 453510 | 15.5  | 12.7  | 12.7  | 14.7  |
| 347164 | 2.1   | 2     | 1.7   | 2.6   |
| 314425 | 20.8  | 39.1  | 24.7  | 39    |
| 345186 | 13.4  | 17.8  | 20.8  | 24.9  |
| 449995 | 8.1   | 9.2   | 8.9   | 9.7   |
| 282980 | 21.7  | 43.2  | 26.9  | 40.3  |
| 284259 | 99.4  | 197.5 | 124.9 | 192.4 |
| 442828 |       | 3.1   |       | 2     |
| 372804 | 9.3   | 19.9  | 16.5  | 22    |
| 336072 | 123.3 | 157.3 | 149.7 | 199.4 |
| 313877 | 6.7   | 12.4  | 13.3  | 11.2  |
| 406131 | 9.9   | 8.9   | 11.5  | 11.6  |
| 314026 | 11    | 12.6  | 14.3  | 16.6  |
| 461378 | 6.1   | 16.6  | 10.7  | 18.2  |
| 282879 | 51.3  | 155   | 121.1 | 186.2 |
| 308046 | 87.8  | 83.4  | 80.2  | 131.2 |

|        |       |       |       |       |
|--------|-------|-------|-------|-------|
| 441427 | 4.8   | 5.5   | 5.6   | 6.9   |
| 267300 | 17.3  | 13.5  | 13.3  | 16    |
| 373461 | 10.3  | 28.2  | 14.5  | 26    |
| 315265 | 65.3  | 143.6 | 121.6 | 186.6 |
| 282934 | 89    | 156.2 | 92.2  | 164.5 |
| 262882 | 24.5  | 50.5  | 42.9  | 59.4  |
| 336094 | 5.9   | 2.4   | 6.6   | 5.6   |
| 404324 | 2.7   | 3     | 7     | 6.9   |
| 265785 | 33.5  | 15.1  | 38.9  | 34.4  |
| 346081 | 34.5  | 53    | 43.5  | 60.5  |
| 270925 | 2.4   | 6.7   | 6.5   | 6.7   |
| 448023 | 17.5  | 13.4  | 21.2  | 14.2  |
| 373342 | 54.3  | 39.1  | 36.6  | 39.4  |
| 345059 | 11.5  | 13.1  | 12.6  | 15.6  |
| 345359 | 11.2  | 17.8  | 12.7  | 17    |
| 378092 | 35.1  | 56.9  | 31.6  | 68.1  |
| 336532 | 209   | 449.8 | 338   | 490.3 |
| 400346 | 11.2  | 12.9  | 11.9  | 15.8  |
| 265819 | 17.5  | 9.6   | 13.8  | 11    |
| 262796 | 12.3  | 12.8  | 11.2  | 11.3  |
| 461371 | 8.8   | 17.4  | 14.7  | 23.4  |
| 431841 | 17.3  | 16    | 13.1  | 18.9  |
| 283292 | 24    | 39.2  | 23.9  | 38.4  |
| 454482 | 92.7  | 118.1 | 75.8  | 139.3 |
| 400526 | 19    | 21.5  | 18.7  | 21.6  |
| 411534 | 2.9   | 4.9   | 2.5   | 2.7   |
| 450075 | 8.9   | 6.6   | 7     | 8.2   |
| 342461 | 113.9 | 192.7 | 195.4 | 227.9 |
|        |       |       |       |       |
| 381156 | 5.3   | 9.8   | 5.5   | 9.6   |
| 321443 |       | 2.1   | 1.5   | 1.9   |
| 346427 | 53.3  | 116.1 | 86.1  | 129.6 |
| 311142 | 66    | 99.2  | 63    | 95.1  |
| 287662 | 16.1  | 16.9  | 18.4  | 22.2  |
|        |       |       |       |       |
| 315520 | 23.2  | 48.9  | 40.1  | 58.5  |
| 350113 | 21.6  | 51.2  | 28.8  | 47    |
| 372905 | 5.4   | 11.6  | 6.6   | 9.9   |
| 322431 | 11    | 14.9  | 11    | 17.9  |
| 431591 | 7.6   | 13.3  | 7.4   | 13.3  |
| 448934 | 2     | 2.6   |       | 2.3   |
| 311015 | 53.8  | 104.3 | 74.6  | 93.2  |
| 433745 |       | 8     | 2.9   | 6.7   |
| 317740 | 2     | 2     | 2.9   | 5.4   |
| 287582 | 20.6  | 15    | 15.2  | 16.2  |
| 318766 | 6.3   | 20.7  | 17.4  | 21.5  |
|        |       |       |       |       |
| 384814 | 2.7   | 2.2   | 6.7   | 3.2   |
| 387858 | 3.2   | 2.2   | 6.2   | 1.6   |
| 387860 | 6     | 2.6   | 7.5   | 6     |
| 377902 | 17.1  | 20.8  | 33.6  | 18.7  |
| 445004 | 1.6   |       | 1.7   |       |

|        |       |       |       |       |
|--------|-------|-------|-------|-------|
| 422307 | 21.2  | 20.5  | 20.5  | 24.8  |
| 289740 | 44    | 35.8  | 52.3  | 32.4  |
| 336004 | 15.5  | 15.7  | 21    | 10.6  |
| 335473 | 62.8  | 60    | 71    | 59.9  |
| 283183 | 14.8  | 10.6  | 16    | 17.6  |
| 327198 | 5.1   | 2     | 5.2   | 3     |
| 327182 | 36.8  | 32.4  | 53.9  | 33.1  |
| 285143 | 41.3  | 43.2  | 78.8  | 53.4  |
| 470738 | 13.7  | 10.3  | 15.1  | 14.7  |
| 344873 | 52.4  | 33.2  | 64.6  | 41.2  |
| 347971 | 45    | 47.4  | 53.2  | 57.1  |
| 461741 | 31.4  | 24.5  | 39.9  | 27.4  |
| 283838 | 39.7  | 38.4  | 74.5  | 52.7  |
| 267794 | 35.7  | 30.2  | 46.4  | 26.1  |
| 334825 | 227.4 | 180.3 | 228.2 | 209.8 |
| 404436 | 45.8  | 36.9  | 55.5  | 42.6  |
| 292062 | 7.3   | 7.8   | 12.3  | 8.5   |
| 340732 | 27.5  | 16.7  | 16.4  | 15.5  |
| 395445 | 34.6  | 25.8  | 34    | 31.9  |
| 340588 | 12.7  | 8     | 10.4  | 8.1   |
| 389496 | 1.6   |       |       |       |
| 279830 | 30.8  | 28    | 50.8  | 32.2  |
| 408671 | 1.4   |       |       |       |
| 372753 | 28.8  | 33.1  | 30.7  | 29.7  |
| 285140 | 26.2  | 23.2  | 33.5  | 22.5  |
| 374640 | 103.3 | 88.4  | 133.5 | 85.5  |
| 475465 | 16.4  | 13.4  | 21.2  | 17.1  |
| 338107 | 92.5  | 74.7  | 113.1 | 86.8  |
| 317048 | 30.6  | 27.2  | 40.9  | 26.8  |
| 407708 | 3.5   | 5.6   | 2.7   | 2.7   |
| 346380 | 15.8  | 11.7  | 11.5  | 12.3  |
| 403346 | 20.6  | 21.1  | 31.1  | 24.8  |
| 380970 | 9.3   | 5.8   | 6.7   | 2.9   |
| 381381 | 19.1  | 14.9  | 18.4  | 19.3  |
| 393841 | 262.6 | 228.3 | 142.8 | 220.8 |
| 398939 | 88.3  | 97.4  | 84.8  | 129.9 |
| 391667 | 141.3 | 152.1 | 142.4 | 132   |
| 391663 | 259.5 | 260.3 | 296.6 | 282   |
| 391662 | 247.4 | 256   | 265.6 | 256.3 |
| 393205 | 55.8  | 52.8  | 46.8  | 52.8  |
| 374426 | 63    | 61.2  | 68.9  | 59.8  |
| 374569 | 61.5  | 54    | 44    | 54.8  |
| 370560 | 295.3 | 283.7 | 279.7 | 278.5 |
| 367590 | 135.2 | 139.7 | 143.1 | 139.7 |
| 370787 | 278.3 | 254.3 | 266.1 | 248.6 |
| 371003 | 121   | 100.8 | 99.1  | 113.8 |
| 428900 | 28.4  | 27    | 27.3  | 55.2  |
| 430759 | 80    | 96.9  | 89.1  | 110   |
| 423852 | 69.9  | 57.4  | 56.6  | 61.5  |
| 424676 | 110.3 | 113.7 | 91.8  | 106.1 |
| 424612 | 268.1 | 247.8 | 203.3 | 219.9 |
| 424560 | 146.7 | 159.8 | 166.4 | 159.1 |

|        |       |       |       |       |
|--------|-------|-------|-------|-------|
| 424499 | 151.9 | 181.5 | 144.2 | 166.8 |
| 424496 | 99.4  | 123.4 | 117.6 | 130   |
| 423628 | 23.6  | 24.4  | 24.5  | 18.6  |
| 433110 | 22.5  | 22.6  | 23.3  | 25.3  |
| 433087 | 43.6  | 40.6  | 42.4  | 40.3  |
| 433085 | 24.5  | 27.5  | 25.2  | 25.4  |
| 432963 | 5.8   | 5.6   | 5.9   | 6.7   |
| 405893 | 107.9 | 91.7  | 82.1  | 90.1  |
| 405827 | 37.9  | 31.6  | 32.8  | 31.2  |
| 405826 | 17.6  | 17.7  | 18.4  | 19.1  |
| 399042 | 58.4  | 69    | 49.4  | 78.9  |
| 448174 | 21.4  | 13.9  | 25    | 15.4  |
| 448253 | 45    | 33.9  | 45.4  | 36    |
| 446199 | 7.4   | 8     | 12.4  | 8.4   |
| 416175 | 15    | 13.8  | 17.4  | 11.4  |
| 416172 | 31.5  | 30.2  | 32.7  | 30.8  |
| 416063 | 2.6   | 2.4   | 3.3   | 2.8   |
| 446502 | 25.8  | 29.9  | 28.6  | 24.3  |
| 288759 | 26.8  | 23.5  | 24    | 30.3  |
| 324275 | 49.6  | 36.2  | 32.2  | 32.5  |
| 324272 | 35.8  | 32.6  | 27.8  | 27.1  |
| 474657 | 22.7  | 22.3  | 21.9  | 24.1  |
| 474644 | 246   | 260.3 | 252.1 | 248.4 |
| 474643 | 180.1 | 195.1 | 170.7 | 182.5 |
| 321030 | 14.8  | 12.1  | 13.9  | 11.5  |
| 321023 | 51.9  | 53.8  | 50.5  | 45.3  |
| 321182 | 9.4   | 7.7   | 6.8   | 9.4   |
| 320220 | 62.4  | 47.5  | 40    | 34.7  |
| 320215 | 50.8  | 41.1  | 42.9  | 39.7  |
| 289047 | 75.9  | 61.5  | 62.1  | 52.2  |
| 290041 | 15.5  | 13.6  | 15.3  | 19.2  |
| 334493 | 117   | 107.2 | 91.6  | 95.9  |
| 334483 | 12.3  | 18.2  | 18.4  | 17    |
| 474846 | 409.3 | 388.1 | 443.9 | 424.3 |
| 335373 | 123.8 | 90    | 66    | 106.3 |
| 284777 | 58.2  | 40.1  | 54.9  | 47.4  |
| 474664 | 30.5  | 27.3  | 27    | 25.6  |
| 474660 | 19.2  | 20    | 23.3  | 23.4  |
| 474842 | 32.5  | 28.5  | 34.2  | 29    |
| 331780 | 5.7   | 7.9   | 2.6   | 7.3   |
| 331716 | 25.8  | 33.3  | 20.6  | 39.4  |
| 314449 | 36.2  | 38    | 36.6  | 34    |
| 314554 | 47.3  | 37.8  | 38    | 31.9  |
| 314169 | 30    | 29    | 32.4  | 32.9  |
| 312039 | 59.6  | 47.6  | 60    | 53.7  |
| 306656 | 73.5  | 82.3  | 73.4  | 81.6  |
| 312356 | 21.2  | 24.3  | 40.6  | 26.5  |
| 315704 | 90.5  | 105.5 | 58.7  | 108.4 |
| 343834 | 49.7  | 45.4  | 44.9  | 41.3  |
| 475271 | 18.9  | 19.8  | 37.2  | 14.8  |
| 475270 | 87.8  | 98.9  | 166.6 | 74.9  |
| 475304 | 27.2  | 32.3  | 28.1  | 31.4  |



|        |       |       |       |       |
|--------|-------|-------|-------|-------|
| 475297 | 67.4  | 85.9  | 82.3  | 98.8  |
| 338813 | 50    | 47.1  | 46.3  | 44.2  |
| 338027 | 122.3 | 125.6 | 127.8 | 104.1 |
| 337696 | 9.2   | 11.4  | 10.6  | 9.9   |
| 337852 | 10    | 10.4  | 9.4   | 8.6   |
| 337868 | 140.9 | 181.1 | 179.9 | 160.4 |
| 337410 | 15.9  | 16.8  | 14.9  | 14.5  |
| 337421 | 134.8 | 120.9 | 135.2 | 126.6 |
| 268794 | 14.1  | 13.5  | 10.4  | 7.6   |
| 474966 | 10.8  | 12.6  | 10.9  | 12.4  |
| 474965 | 165.8 | 199.2 | 181.1 | 216.3 |
| 284256 | 1.8   |       | 1.9   | 1.7   |
| 446211 | 1.2   |       |       |       |
| 454755 | 16.7  | 18.5  | 10.6  | 20.4  |
| 306657 | 185   | 204.6 | 185.1 | 208.6 |
| 433229 | 2.1   | 2.4   | 2.7   | 2.7   |
| 343687 | 9.1   | 5.9   | 5.6   | 5.9   |
| 367950 | 7.8   | 6.6   | 3     | 6.2   |
| 323662 | 2.4   | 2.8   | 6.3   | 2.8   |
| 367592 |       | 1.9   | 3.5   | 2.3   |
| 331713 | 15.6  | 22.1  | 15    | 29    |
| 424209 | 96.8  | 100.3 | 77.8  | 87.4  |
| 337268 | 8.7   | 9.4   | 8.8   | 8.6   |
| 343786 | 114.5 | 101.2 | 95.8  | 79.1  |
| 343659 | 184.7 | 179.9 | 157.2 | 136.8 |
| 324375 | 5     | 1.8   | 3     | 5.6   |
| 288981 | 102.2 | 103.5 | 112.1 | 99.1  |
| 320226 | 51.8  | 40.3  | 36.7  | 36.9  |
| 430789 | 11.3  | 12.1  | 8.5   | 12.5  |
| 312942 | 33.6  | 33.6  | 34.8  | 32.8  |
| 258772 | 22.9  | 13.2  | 24.1  | 20.8  |
| 306782 | 10.2  | 10    | 8.2   | 8.1   |
| 283561 | 7.4   | 9.7   | 9.5   | 10    |
| 404157 | 14    | 13.5  | 12.7  | 13.5  |
| 448171 | 54.9  | 44.9  | 61.1  | 42.6  |
| 367661 | 58.6  | 67.3  | 73.1  | 64.8  |
| 403183 | 7.7   | 5.2   | 9.6   | 9.5   |
| 290003 | 17.3  | 20.9  | 21.9  | 20.5  |
| 324115 | 2.3   | 4.9   | 5.6   | 1.7   |
| 382063 | 34.1  | 31.2  | 28.9  | 34.4  |
| 370568 | 27.8  | 26.7  | 23.9  | 31.9  |
| 374517 | 15.8  | 16.3  | 14.6  | 17.3  |
| 369574 | 78.9  | 75.4  | 76.3  | 77.2  |
| 372050 | 14.6  | 10.5  | 12    | 10.4  |
| 447938 | 14.3  | 17.4  | 15    | 16.5  |
| 306784 | 45    | 71.7  | 45.6  | 92.5  |
| 430691 | 17.9  | 13.6  | 17.2  | 13    |
| 283556 | 50.2  | 63.2  | 68.4  | 86.5  |
| 432580 | 17.2  | 15    | 10.7  | 14.4  |
| 308023 | 21.6  | 36.9  | 55.7  | 47.8  |
| 334480 | 265.1 | 221.3 | 210.8 | 244.5 |
| 371071 | 43    | 38    | 41    | 41.6  |

|        |       |       |       |       |
|--------|-------|-------|-------|-------|
| 283643 | 67.8  | 62.9  | 55    | 76.3  |
| 337566 | 9.4   | 10.3  | 9     | 9.9   |
| 367130 | 2.5   |       |       |       |
| 432497 | 29.8  | 28.1  | 24.5  | 30.3  |
| 421039 | 2.4   | 2.3   | 2.6   | 2.4   |
| 381300 | 58.8  | 50.7  | 61.8  | 57.4  |
| 306983 | 27.7  | 24.4  | 16.5  | 25.7  |
| 321798 | 2     | 2.9   | 3     | 2.3   |
| 308254 | 95.7  | 94.8  | 101.2 | 92.3  |
| 424615 | 31.2  | 26.8  | 25.4  | 27.4  |
| 339956 | 72.2  | 63.7  | 80    | 76.1  |
| 304624 | 65.7  | 84.5  | 85.2  | 86.6  |
| 381122 | 45.5  | 59.6  | 67.8  | 64.8  |
| 334855 | 47.1  | 42.7  | 50.2  | 38.3  |
| 395147 | 58.7  | 48.1  | 43.8  | 56.4  |
| 337490 | 34.9  | 30.7  | 28.9  | 31.7  |
| 308128 | 234.5 | 216.8 | 214.1 | 222.5 |
| 281619 | 21.1  | 21.7  | 23    | 16.7  |
| 281619 | 21.1  | 21.7  | 23    | 16.7  |
| 337778 | 33.7  | 32.2  | 27.3  | 28.4  |
| 335733 | 29.1  | 30.5  | 34.9  | 32.1  |
| 404273 | 11.4  | 11.3  | 13    | 10.1  |
| 337981 | 51.2  | 55.3  | 38.5  | 53.1  |
| 381456 | 13.4  | 10.6  | 12.4  | 10    |
| 312840 | 8     | 7.9   | 7.7   | 7     |
| 344002 | 7.4   | 6.1   | 6.6   | 5.6   |
| 405910 | 8.6   | 1.8   | 2.3   | 2.2   |
| 320024 | 7.1   | 7.9   | 8.2   | 7.4   |
| 314751 | 11.9  | 8.1   | 7.5   | 9.6   |
| 381221 | 171.3 | 153.2 | 156.8 | 149.8 |
| 331649 |       | 2.7   | 1.7   | 2.1   |
| 424822 | 34.3  | 36.1  | 35.4  | 27.9  |
| 337627 | 53.5  | 42.7  | 31.2  | 37.4  |
| 316936 | 11.1  | 9.5   | 10.7  | 11.3  |
| 338833 | 2.2   | 5.5   | 2.1   | 6     |
| 308310 |       |       |       | 1.7   |
| 338124 | 60.8  | 55.9  | 50.5  | 53.6  |
| 347437 | 18.2  | 18.8  | 19.8  | 19.6  |
| 324108 | 2.5   | 2.2   | 7.2   | 2.7   |
| 320545 | 7.9   | 8.6   | 7.6   | 7.1   |
| 398938 | 25.6  | 23.2  | 13.2  | 28.1  |
| 308361 | 79.6  | 78    | 85.2  | 77.6  |
| 343774 | 153.3 | 140.6 | 166   | 159.3 |
| 320857 | 2.4   | 1.9   | 1.8   | 5.5   |
| 384373 | 18.4  | 11.5  | 26.7  | 13.5  |
| 384297 | 6.4   | 3     | 7.4   | 3.4   |
| 384936 | 29.8  | 23.8  | 21.9  | 23.4  |
| 384949 | 11.9  | 10.2  | 9.8   | 9.7   |
| 385035 | 12.9  | 11.2  | 12.2  | 10.9  |
| 380692 | 7.9   | 3.3   | 5.5   | 5.3   |
| 394974 | 89.5  | 86.6  | 72.8  | 69.1  |
| 394910 | 70.2  | 65.8  | 46.3  | 64.1  |

|        |       |       |       |       |
|--------|-------|-------|-------|-------|
| 394897 | 46.6  | 41    | 34.3  | 35.2  |
| 393994 | 19.7  | 17.5  | 18.2  | 13.4  |
| 393994 | 19.7  | 17.5  | 18.2  | 13.4  |
| 450653 | 44.5  | 41.1  | 40.7  | 41.1  |
| 450732 | 136.9 | 128.1 | 123.6 | 115.7 |
| 394883 | 151.7 | 164.5 | 151.7 | 183.3 |
| 394880 | 113.7 | 128.2 | 97.9  | 105.1 |
| 394838 | 42.2  | 34.3  | 31.7  | 28.8  |
| 394819 | 109.5 | 83.4  | 78.5  | 79.2  |
| 394473 | 83.1  | 77.2  | 75.3  | 70.3  |
| 394392 | 153.3 | 124.1 | 126.2 | 116.2 |
| 394268 | 204.2 | 208   | 220.5 | 200.6 |
| 398241 | 241.6 | 268.5 | 227.1 | 237   |
| 450810 | 41.2  | 31.8  | 35.5  | 37.3  |
| 456643 | 3     | 5.6   | 8.4   | 5.5   |
| 456614 | 14.5  | 12.4  | 17.4  | 14.8  |
| 360586 |       |       |       | 1.9   |
| 360480 | 2.7   | 5.7   | 2.6   | 2.9   |
| 360358 | 16    | 14.7  | 16.7  | 17.2  |
| 456748 | 36.6  | 35.1  | 55.4  | 33.1  |
| 456788 | 15.3  | 14.1  | 19.3  | 13.3  |
| 359913 |       |       | 1.5   |       |
| 456888 | 40.2  | 28.5  | 36.8  | 27.2  |
| 457025 | 27.4  | 22.3  | 24.5  | 23.9  |
| 357626 | 12.4  | 9.8   | 10.3  | 9     |
| 357470 | 16.4  | 13.4  | 14.9  | 12.4  |
| 357457 | 10.1  | 7.1   | 12.5  | 7.2   |
| 378638 | 120.1 | 75.6  | 73    | 68.7  |
| 378601 | 39.1  | 33.2  | 36.1  | 37.1  |
| 378532 | 52.4  | 67.3  | 73.7  | 69    |
| 455814 | 108.9 | 95.5  | 103.7 | 95.6  |
| 455822 | 37.6  | 33.8  | 40.7  | 35.5  |
| 455937 | 37.5  | 28.4  | 27.1  | 36.2  |
| 367776 | 3.1   | 3     | 2.2   | 1.4   |
| 370851 | 19.9  | 12.4  | 21.1  | 12.7  |
| 370851 | 19.9  | 12.4  | 21.1  | 12.7  |
| 370837 | 140.2 | 121.7 | 120.5 | 110   |
| 370837 | 140.2 | 121.7 | 120.5 | 110   |
| 372140 | 46.6  | 38    | 35.9  | 34    |
| 372035 | 100   | 121.7 | 110.9 | 125.1 |
| 424150 | 47    | 51.2  | 52.4  | 47.8  |
| 434362 | 1.7   |       | 2.2   | 1.6   |
| 434666 | 16.9  | 12.5  | 17.3  | 15.2  |
| 434586 | 11.4  | 15    | 12.4  | 12.7  |
| 434567 | 31.6  | 27.4  | 35.1  | 29.3  |
| 434505 | 23.7  | 22.8  | 27.9  | 25.2  |
| 434474 | 39.2  | 35.5  | 47.7  | 44.3  |
| 434450 | 33.1  | 30.7  | 32.2  | 32.7  |
| 434378 | 7.3   | 6.9   | 11.6  | 6.9   |
| 406495 | 2.7   | 2.2   | 2.4   | 2.9   |
| 405018 | 47.4  | 31.5  | 39.6  | 41.2  |
| 408842 | 77.5  | 55.9  | 63.8  | 55    |

|        |       |       |       |       |
|--------|-------|-------|-------|-------|
| 446785 | 90    | 95.7  | 98.9  | 94.6  |
| 406756 | 2.7   |       | 1.6   |       |
| 406661 | 7.4   | 5.7   | 2.3   | 6.3   |
| 408976 | 18.7  | 13.7  | 16.8  | 16.2  |
| 448970 | 10    | 8.9   | 12.5  | 12    |
| 422163 | 17.8  | 20.2  | 24.1  | 21.5  |
| 422162 | 16.8  | 18.2  | 19.2  | 21.1  |
| 466942 | 3.1   | 3.2   | 3.1   | 2.5   |
| 474912 | 39.1  | 48.9  | 45.7  | 68.2  |
| 474905 | 43.4  | 49.6  | 43.1  | 60.2  |
| 474801 | 226.9 | 236.4 | 240.1 | 242.1 |
| 313925 | 35    | 49.4  | 43.6  | 54.5  |
| 471843 | 14.8  | 12.3  | 13    | 10.7  |
| 471828 | 37    | 31.6  | 36.1  | 36.4  |
| 471947 | 15.7  | 17    | 17    | 17.6  |
| 314061 | 70.1  | 49.2  | 52.8  | 50.9  |
| 314452 | 2.3   | 2     | 1.7   | 2     |
| 314413 | 18.3  | 17    | 14.6  | 18.4  |
| 468486 | 22.9  | 23.4  | 20.6  | 24.2  |
| 314696 | 21.9  | 18.8  | 18.9  | 20.6  |
| 314555 | 15.3  | 14.2  | 16    | 22.3  |
| 314071 | 15.9  | 11.9  | 14.1  | 12.4  |
| 314331 | 6.4   | 2.4   | 1.8   | 7.8   |
| 314292 | 20.5  | 19.8  | 13.2  | 17.9  |
| 314198 | 45.4  | 31.4  | 38.5  | 35.9  |
| 314298 | 48.5  | 39.1  | 46.3  | 40.3  |
| 471677 | 14.7  | 18    | 17.8  | 17.5  |
| 469394 | 38.1  | 27.7  | 30.2  | 27.6  |
| 311813 | 15.3  | 16.2  | 13.3  | 10.7  |
| 311687 | 15    | 19    | 27.1  | 23.4  |
| 473965 | 18.4  | 18.5  | 20.1  | 18    |
| 473929 | 15.2  | 13.7  | 16.6  | 12.1  |
| 467309 | 17.9  | 11.3  | 8     | 8.8   |
| 467322 | 25.4  | 18.3  | 21.7  | 16.5  |
| 315290 | 21.7  | 21.9  | 17    | 19.7  |
| 314974 | 18.3  | 19    | 15.4  | 17.6  |
| 467975 | 1.5   |       |       |       |
| 475226 | 127   | 169.7 | 116   | 211.1 |
| 475276 | 19.8  | 18.6  | 21    | 23.8  |
| 475280 | 17.8  | 11.3  | 15.3  | 17.9  |
| 338798 | 59.1  | 42.6  | 33.5  | 41.5  |
| 475533 | 3.3   | 2.7   | 2.3   | 3.3   |
| 243939 | 53.6  | 48.5  | 56.1  | 53.4  |
| 475532 | 12.5  | 10.9  | 10.2  | 10    |
| 474152 | 6.2   | 3.3   | 2.8   | 2.4   |
| 404890 | 120.6 | 146.9 | 179.4 | 166.6 |
| 432113 | 12.7  | 11.8  | 11.1  | 10.6  |
| 371938 | 35.4  | 35.8  | 30    | 39.3  |
| 370776 | 115.1 | 95.4  | 91.8  | 99.6  |
| 393984 | 68.2  | 55.8  | 61.8  | 44.1  |
| 394834 | 128   | 128.4 | 100.9 | 134.5 |
| 472079 | 8.8   | 7.9   | 11.1  | 10.4  |

|        |       |       |       |       |
|--------|-------|-------|-------|-------|
| 452503 | 19.6  | 13.6  | 17.7  | 15.2  |
| 449932 | 17.4  | 10.3  | 10.7  | 14.6  |
| 380820 | 6.8   | 3.4   | 6.4   | 6.3   |
| 408847 | 23.4  | 13.5  | 17.1  | 13.5  |
| 381217 | 91.7  | 84.8  | 90.1  | 89.3  |
| 393984 | 68.2  | 55.8  | 61.8  | 44.1  |
| 439255 | 6.8   | 2.9   | 6.2   | 3.1   |
| 451088 | 33.3  | 29.6  | 27.8  | 30    |
| 394106 | 31    | 28.3  | 28.5  | 27.5  |
| 311696 | 48    | 57.9  | 69.7  | 57.7  |
| 446786 | 3     | 1.5   | 1.4   | 2.1   |
| 307998 | 36.1  | 33.7  | 36.6  | 35.5  |
| 454947 | 21.5  | 21.4  | 22.6  | 20.5  |
| 455541 | 25.9  | 21.4  | 22.3  | 21.1  |
| 459831 | 16.1  | 15.6  | 16.8  | 17    |
| 448956 | 63.5  | 60    | 58.7  | 60    |
| 384315 |       |       | 1.5   |       |
|        |       |       |       |       |
| 373858 | 25.1  | 17.2  | 25.4  | 18.1  |
| 378679 | 2.2   | 2.9   | 3.1   | 2.1   |
| 467184 | 10.3  | 8.1   | 13.7  | 12.7  |
| 380734 | 8.1   | 6.6   | 9.3   | 8     |
| 394718 | 84.7  | 75.2  | 87.3  | 84    |
| 394248 | 50.3  | 39.1  | 49.4  | 29.6  |
| 355406 | 7.1   | 7.2   | 10.4  | 5.6   |
| 385724 | 3.3   | 6.1   | 2.2   | 3.4   |
| 334707 | 317   | 332.4 | 297.4 | 341.8 |
| 314204 | 3.1   | 2.3   | 2.9   | 2.5   |
| 449638 | 27.5  | 23.9  | 25.2  | 23.9  |
| 288647 | 16.7  | 12.5  | 17.1  | 14.9  |
| 307923 | 105.7 | 123.4 | 135.7 | 144.5 |
| 434801 | 16.7  | 10.7  | 13.7  | 10.7  |
| 448060 | 21.9  | 25.5  | 56.1  | 32.8  |
| 455072 | 18.9  | 19    | 15    | 20.3  |
| 369829 | 18.4  | 15.2  | 14.1  | 15    |
| 408715 | 1.8   | 1.8   | 3.3   |       |
| 469221 | 9.6   | 12.6  | 14.1  | 11.2  |
| 394657 | 58.9  | 51.4  | 47.1  | 50.6  |
| 381117 | 170.3 | 144.9 | 159.8 | 145   |
| 404891 | 13.1  | 12.8  | 14.1  | 12.6  |
| 360453 | 2.7   | 2.9   | 6.3   | 6     |
| 450743 | 41.4  | 32.4  | 37.4  | 35.8  |
| 423649 | 2     | 1.9   | 2.3   |       |
| 441267 | 36.6  | 33.4  | 40    | 37.3  |
| 398172 | 259.2 | 274.1 | 245.1 | 257.4 |
| 451269 | 34.6  | 33.3  | 33.1  | 37.1  |
| 393913 | 245.6 | 188.8 | 197.4 | 214.8 |
| 398197 | 24.6  | 26.1  | 25.7  | 26.7  |
| 344595 | 12.8  | 11.3  | 11.2  | 11.9  |
| 316012 | 21.1  | 19.5  | 24.1  | 20.7  |
| 394701 | 16.5  | 19.1  | 16.8  | 14.8  |
| 473754 | 22    | 20.5  | 20    | 22.6  |

|        |       |       |       |       |
|--------|-------|-------|-------|-------|
| 407944 | 11.5  | 6.9   | 7.5   | 3.1   |
| 448297 | 28    | 24.2  | 37.8  | 28.3  |
| 434394 | 2.4   | 3.4   | 3.2   | 1.8   |
| 471657 | 7.8   | 7.4   | 9.6   | 9.7   |
| 424238 | 38.9  | 30.4  | 32.6  | 37.2  |
| 381294 | 33.6  | 27.1  | 32.6  | 33    |
| 315669 | 21.9  | 26.5  | 33.1  | 29.5  |
| 452485 | 13.5  | 8.2   | 10.2  | 11.4  |
| 403226 | 13.3  | 9.1   | 11.9  | 13.8  |
| 339746 | 12.6  | 19.3  | 23.2  | 21.5  |
| 453345 | 8.7   | 7.8   | 9     | 9.2   |
| 455704 | 108.1 | 100   | 127.5 | 102.3 |
| 373689 | 16.3  | 20.7  | 24.4  | 21.1  |
| 425893 | 22.7  | 35.9  | 17.8  | 19.4  |
| 384482 | 2.2   | 2.6   | 3.3   | 5.7   |
| 469245 | 2.3   | 2.2   | 3.3   | 2.9   |
| 460729 | 5.6   | 3.4   | 3     | 2.8   |
| 394113 | 59.4  | 50.9  | 47.5  | 56.4  |
| 467458 |       | 1.2   |       | 1.5   |
| 344411 | 10.3  | 11.5  | 9.9   | 12.9  |
| 424314 | 25.8  | 27.1  | 23.7  | 29.6  |
| 380810 | 28    | 30.9  | 25.6  | 32    |
| 406860 | 1.9   | 2.4   | 1.6   |       |
| 394907 | 48.6  | 36.5  | 37.1  | 33.7  |
| 335426 | 105   | 86.1  | 93.4  | 73.5  |
| 427008 | 61.9  | 43.2  | 43    | 46.1  |
| 395516 | 111.2 | 57.5  | 58.5  | 66.9  |
| 453932 | 26.6  | 20.4  | 26.9  | 20.6  |
| 394829 | 164.9 | 127   | 117.4 | 112.6 |
| 423891 | 88.6  | 70.6  | 83.3  | 67.9  |
| 378912 | 62.7  | 57    | 65.9  | 62.8  |
| 393313 | 7.1   | 6.9   | 6     | 13.2  |
| 427694 | 46.7  | 34.7  | 31.5  | 28.9  |
| 448498 | 20.2  | 19.7  | 28    | 18.7  |
| 394563 | 85.5  | 73.5  | 64.8  | 70.2  |
| 393911 | 30.6  | 26.2  | 24.3  | 40.4  |
| 314841 | 17.5  | 19.1  | 23.5  | 22.3  |
| 453729 | 30.8  | 30    | 32    | 33.7  |
| 449796 | 11.9  | 14.7  | 11.7  | 14.4  |
| 472099 |       | 2.1   | 1.5   | 3.3   |
| 395424 | 80    | 41.8  | 48.7  | 52.8  |
| 424072 | 9.1   | 7.7   | 11.4  | 9.3   |
| 370798 | 248.1 | 168.3 | 125.3 | 150.6 |
| 453242 | 12.6  | 12.2  | 9.6   | 10.4  |
| 334904 | 53.6  | 39    | 29.2  | 48.7  |
| 357635 | 6.2   | 2.3   | 2.5   | 3.3   |
| 288618 | 2.5   | 1.4   |       |       |
| 405107 | 6     | 8.4   | 7     | 5.9   |
| 381022 | 37.9  | 30.1  | 30.9  | 31.1  |
| 383551 | 46.1  | 62.2  | 48.8  | 71.6  |
| 383569 | 24.6  | 24.4  | 24.4  | 27.5  |
| 383621 | 2.7   | 5.8   | 3.5   | 6.2   |

|        |       |       |       |       |
|--------|-------|-------|-------|-------|
| 383959 | 9.6   | 11.1  | 11.5  | 14.4  |
| 383853 | 35.5  | 45.2  | 31.4  | 48.5  |
| 383837 | 5.4   | 7     | 2.9   | 8.5   |
| 383717 | 28    | 36.5  | 28.6  | 33.1  |
| 378975 | 27.2  | 28.7  | 22.8  | 27.9  |
| 395571 | 119.1 | 94.3  | 55.1  | 79.4  |
| 395503 | 36.2  | 37.1  | 33.7  | 39.5  |
| 395384 | 38.7  | 37    | 36.1  | 46.3  |
| 395473 | 115.8 | 142.6 | 114.1 | 150.5 |
| 388383 | 17.3  | 16.9  | 15.5  | 21    |
| 388374 | 12.3  | 15.9  | 9.8   | 14.3  |
| 388266 |       |       | 1.3   |       |
| 363428 | 22    | 23.5  | 15.1  | 28.3  |
| 363313 | 6.1   | 9.2   | 5.5   | 7.1   |
| 378056 | 6.5   | 7     | 3.5   | 3.4   |
| 377952 | 8.6   | 8.9   | 10.7  | 10.6  |
| 377943 | 7.8   | 8.3   | 11.7  | 10    |
| 378623 | 51.8  | 53.7  | 47.6  | 61.6  |
| 378602 | 13.2  | 16.3  | 11.3  | 13.9  |
| 378520 | 10.9  | 12.1  | 9.6   | 8.2   |
| 367413 | 6.8   | 8.7   | 7.4   | 8.1   |
| 367205 | 17.6  | 17.7  | 16.7  | 21.7  |
| 367144 | 6.1   | 7.6   | 5.4   | 7.3   |
| 367122 | 17    | 21.5  | 19.3  | 22.8  |
| 455398 | 38.5  | 33.9  | 23.5  | 38.8  |
| 455307 | 31.3  | 21    | 16.3  | 17.2  |
| 455333 | 3.1   | 3.2   | 6.1   | 3.1   |
| 427826 | 84.8  | 104.8 | 70.6  | 96.3  |
| 427746 | 29.5  | 27.4  | 29.7  | 31.2  |
| 427834 | 15.4  | 18.8  | 15.4  | 19.9  |
| 427908 | 35.6  | 31    | 29.5  | 31.3  |
| 424765 | 33.9  | 25.3  | 26    | 34.3  |
| 435168 | 9.9   | 13.6  | 11.1  | 13.9  |
| 435302 | 67.8  | 75    | 51.6  | 86.2  |
| 435303 | 89.6  | 87.1  | 56.4  | 93.7  |
| 406069 | 35.4  | 45.2  | 47.4  | 59.6  |
| 401153 | 11.8  | 10.4  | 7     | 14.9  |
| 401138 | 17.6  | 23.6  | 16.4  | 25.6  |
| 419109 | 13.9  | 12.9  | 9.3   | 11    |
| 415943 | 10.1  | 10.9  | 9.5   | 10.9  |
| 326374 | 5.7   | 7.5   | 6.9   | 6.2   |
| 320403 | 2.2   | 2.5   | 2.4   | 1.7   |
| 322160 | 5.3   | 7.4   | 7     | 7.6   |
| 322173 | 9.2   | 9.2   | 9.7   | 8.7   |
| 464970 | 14.1  | 15    | 13.5  | 16    |
| 319731 | 5.9   | 6.7   | 5.8   | 6.5   |
| 306036 | 172   | 167.9 | 172.5 | 151.3 |
| 318738 | 19    | 18.8  | 13.4  | 19.1  |
| 318675 | 34.6  | 46.5  | 37.4  | 54.9  |
| 319577 | 2     | 1.8   |       | 2     |
| 343830 | 73.5  | 70.4  | 41    | 59.3  |
| 343802 | 35.7  | 38.5  | 36.5  | 43.8  |

|        |       |       |      |       |
|--------|-------|-------|------|-------|
| 344824 | 43.9  | 33.4  | 23.7 | 38.6  |
| 266830 | 8.9   | 9.3   | 10.2 | 9.9   |
| 266953 | 19.3  | 12.1  | 13.9 | 11.6  |
| 267754 | 36.4  | 40.9  | 34.3 | 51.6  |
| 267830 | 30.5  | 33.6  | 30.4 | 37.5  |
| 260227 | 9.6   | 16.6  | 14.5 | 17.7  |
| 260271 | 41.9  | 40    | 43.8 | 41.6  |
| 349003 | 7.6   | 10.5  | 6.6  | 11    |
| 345726 | 24.8  | 22.9  | 19.8 | 23.8  |
| 280202 | 100.7 | 107.5 | 89.4 | 142.6 |
| 351323 | 9.9   | 13.7  | 12.5 | 17.8  |
| 260143 | 18.9  | 15.5  | 23.2 | 18.6  |
| 367228 | 2.1   | 1.3   |      | 1.9   |
| 293706 | 105.5 | 88.7  | 78.2 | 108.9 |
| 407621 | 79.2  | 70.2  | 55.5 | 87.9  |
| 333783 | 69.9  | 58.4  | 48.8 | 67.3  |
| 343647 | 17.8  | 17.7  | 12.7 | 24.1  |
| 376860 | 45.7  | 53.7  | 38   | 59    |
| 428833 | 39.5  | 21.8  | 26.3 | 25.1  |
| 267768 | 18.8  | 20.3  | 13.8 | 22.5  |
| 353117 | 9.5   | 8     | 7.7  | 9.6   |
| 311024 | 9.3   | 13.3  | 11.6 | 20.6  |
| 379794 | 2.3   | 6.2   | 3.1  | 9.1   |
| 373005 | 23.6  | 18.2  | 17.9 | 18.3  |
| 280206 | 3.2   | 8.4   | 6.3  | 9.2   |
| 367422 | 1.5   |       |      | 1.5   |
| 395637 | 19.7  | 22.9  | 14.2 | 23.9  |
| 395734 | 31.7  | 23    | 26.9 | 23.9  |
| 317002 | 42.8  | 39.4  | 43.9 | 41.9  |
| 407512 | 93.3  | 112.3 | 88.3 | 131.1 |
| 343497 | 9.9   | 11.9  | 10   | 11.9  |
| 344961 |       |       | 1.6  | 2.4   |
| 341609 | 14.5  | 12.6  | 13.7 | 13.9  |
| 283164 | 65.2  | 81.8  | 96.7 | 84.5  |
| 378074 | 47.5  | 39.5  | 32.9 | 45.4  |
| 430829 | 9     | 11    | 8.4  | 9.1   |
| 431206 | 10.8  | 10.1  | 11.4 | 11.8  |
| 431206 | 10.8  | 10.1  | 11.4 | 11.8  |
| 406026 | 13.1  | 13.2  | 10.3 | 12.9  |
| 376802 | 25.5  | 33.7  | 28.5 | 36    |
| 372826 | 56    | 52.2  | 49.9 | 59.2  |
|        |       |       |      |       |
| 455339 | 16.6  | 12.9  | 17.1 | 16.2  |
| 322334 | 2.8   | 2.3   |      | 2.3   |
| 388437 |       | 1.4   |      |       |
| 318610 | 2.3   | 6.2   | 6.5  | 9.4   |
| 304577 | 32.1  | 40.4  | 40.9 | 56.6  |
| 307273 | 18.1  | 15.2  | 12.2 | 18.4  |
| 379937 | 6.2   | 2     | 1.8  | 2.9   |
| 371352 | 62.3  | 70.3  | 52.5 | 68.7  |
|        |       |       |      |       |
| 388288 | 10    | 12.6  | 9.8  | 10.7  |



|        |       |       |       |       |
|--------|-------|-------|-------|-------|
| 336176 | 13.5  | 10.9  | 12.3  | 12.2  |
| 403165 | 3.3   | 7.4   | 5.9   | 10.8  |
| 311039 | 8.9   | 10.2  | 12.8  | 12.6  |
|        |       |       |       |       |
| 259681 | 3.3   | 9.2   | 6.5   | 9     |
| 465095 | 2.7   | 1.5   | 1.8   | 2.4   |
| 455409 | 13.6  | 11.9  | 8.5   | 11.6  |
| 369999 | 100.8 | 111.4 | 93    | 128.4 |
| 393382 | 49.8  | 43.8  | 39.8  | 53.5  |
| 266737 | 3.1   | 2.5   | 3.2   | 2.1   |
| 379061 | 2.4   | 5.7   | 2.8   | 5.8   |
| 304515 | 42.5  | 39.2  | 39.5  | 65.4  |
| 363344 |       | 1.5   |       | 2     |
|        |       |       |       |       |
| 319878 | 13.3  | 14.4  | 8.3   | 18.7  |
| 354310 | 1.3   | 6.3   | 2.6   | 2.9   |
| 406427 | 1.8   | 1.9   | 1.5   |       |
| 383750 | 2.4   | 2.3   | 3.1   | 3.2   |
| 385469 | 4.8   | 7.7   | 6     | 7.9   |
| 385577 | 24.8  | 31.7  | 24.8  | 35.2  |
| 385586 | 21.1  | 27.3  | 20.3  | 31.8  |
| 393739 | 68.4  | 90.5  | 86.5  | 96    |
| 355938 | 2.5   | 3     |       | 2     |
| 356838 | 12.5  | 17.5  | 13.4  | 20.8  |
| 370676 | 40    | 55.5  | 39    | 57.9  |
| 370507 | 168.1 | 200.1 | 226.3 | 228.9 |
| 372602 | 23.6  | 17    | 19.3  | 18.3  |
| 373617 | 63.1  | 79.2  | 68.6  | 84.2  |
| 399025 | 16.2  | 23.7  | 19.7  | 19.5  |
| 427278 | 21    | 16.9  | 12.3  | 15    |
| 440006 | 1.9   | 1.8   | 1.4   | 1.6   |
| 440099 | 42.8  | 62.1  | 50.6  | 67    |
| 404493 | 3.4   | 5.9   | 1.9   | 5.2   |
| 400492 | 25.7  | 31.2  | 25.3  | 30.4  |
| 400386 | 24    | 31.9  | 27.9  | 36.3  |
| 399065 | 51.4  | 73.7  | 68.5  | 71.5  |
| 414865 | 16.3  | 16    | 15.4  | 20.3  |
| 414720 | 5.4   | 8.8   | 9.4   | 11.7  |
| 320299 | 5.6   | 7.6   | 9.3   | 10.8  |
| 290159 | 49.3  | 56.5  | 45.3  | 62.4  |
| 313474 | 61.4  | 65    | 62.2  | 69    |
| 471331 | 3.2   | 3.2   | 5     | 6.9   |
| 471484 | 8.4   | 14.2  | 5.7   | 12.1  |
| 318811 | 43.7  | 58.2  | 60.4  | 68.1  |
| 345299 | 35.6  | 65.8  | 57.8  | 82.2  |
| 350755 | 11    | 14.7  | 12.1  | 19.2  |
| 475132 | 1.9   | 2     | 1.9   | 2.1   |
| 350925 | 2.3   | 7.3   | 3.2   | 4.9   |
| 348369 | 59.2  | 92.5  | 81.3  | 98.5  |
| 348507 | 36.8  | 54.9  | 49.5  | 54    |
| 351656 | 20.5  | 29.8  | 23.5  | 29.9  |
| 351653 | 39.1  | 46.3  | 35.9  | 54.8  |

|        |       |       |       |       |
|--------|-------|-------|-------|-------|
| 337584 | 52.8  | 51.2  | 46.5  | 50.5  |
| 338035 | 47.3  | 49.7  | 52.9  | 53.7  |
| 337872 | 79.2  | 106.8 | 85.8  | 93.1  |
| 337915 | 93    | 127.8 | 131.1 | 143.8 |
| 337294 | 118.1 | 135.1 | 121   | 162.1 |
| 337439 | 73    | 111.8 | 95.2  | 130.4 |
| 268779 | 15.3  | 28.2  | 22.6  | 27.7  |
| 268734 | 22.7  | 34.4  | 30.3  | 40.5  |
| 269024 | 35.2  | 47.2  | 42.7  | 56.9  |
| 268986 | 22.8  | 35.2  | 27.7  | 33.5  |
| 268927 | 50.5  | 76.9  | 64.9  | 91.8  |
| 268887 | 32.1  | 54.1  | 39    | 56.7  |
| 268837 | 30.6  | 39.8  | 29.2  | 44.3  |
| 336341 | 25.2  | 30.5  | 31.8  | 35.3  |
| 268697 | 16    | 23.9  | 21.4  | 27.9  |
| 268642 | 32.9  | 43.8  | 44.6  | 53.2  |
| 268603 | 17.6  | 21.2  | 20.9  | 26.1  |
| 475112 | 17.3  | 23.1  | 19.1  | 29    |
| 475114 | 109.5 | 140.9 | 134.2 | 183.1 |
| 269088 | 16.7  | 20.3  | 19.8  | 22.6  |
| 280309 | 44.4  | 58.6  | 58.9  | 68.2  |
| 337721 | 53.2  | 72.9  | 47    | 60.8  |
| 269170 | 16.5  | 22.8  | 18.6  | 23.5  |
| 269206 | 12.6  | 17.3  | 15.5  | 21.4  |
| 280405 | 27.8  | 30.1  | 27.3  | 32.9  |
| 269122 | 16.8  | 28.1  | 22.9  | 33.6  |
| 280616 | 67.7  | 66.3  | 62.4  | 80.1  |
| 280315 | 9     | 17.2  | 17.3  | 22.1  |
| 370513 | 21.8  | 31.6  | 31.1  | 37.2  |
| 385736 | 3.3   | 2.2   | 1.8   | 5.5   |
| 334189 | 254   | 180.7 | 154.6 | 194.2 |
| 393749 | 14.5  | 25.2  | 19.7  | 27.2  |
| 344960 | 81.4  | 98.3  | 77.2  | 114.9 |
| 305235 | 26.3  | 34    | 31.3  | 34.9  |
| 305827 | 10.7  | 12.5  | 17.3  | 17.3  |
| 333779 | 65.6  | 69.5  | 65.4  | 77.1  |
| 398959 | 21.7  | 20    | 23.6  | 22.8  |
| 304470 | 94    | 133.4 | 70.8  | 171.3 |
| 358444 | 2.4   |       | 2.9   | 1.7   |
| 337927 | 76.1  | 69.4  | 86    | 69.7  |
| 348370 | 8.9   | 14.6  | 13.6  | 18.5  |
| 290018 | 9.1   | 19.7  | 18.6  | 27.4  |
| 305923 | 143   | 179.4 | 230.3 | 251.9 |
| 369249 | 20.5  | 19.7  | 16.4  | 21.8  |
| 398843 | 49.3  | 48.2  | 51.5  | 54.2  |
| 378609 | 6.9   | 9.2   | 5.6   | 7.1   |
| 295853 | 2.9   | 3     | 5.7   | 2.1   |
| 345310 | 18.9  | 33    | 27.8  | 33.3  |
| 400414 | 6     | 5.7   | 7.9   | 7.7   |
| 374106 | 31.2  | 38.1  | 31.9  | 32.4  |
| 289733 | 10.3  | 17.5  | 9     | 17.6  |
| 323380 | 2.7   | 1.9   | 1.8   | 2.5   |

|        |       |       |       |       |
|--------|-------|-------|-------|-------|
| 290065 | 72.7  | 142.4 | 148.6 | 198.8 |
| 438235 |       | 1.9   | 1.5   |       |
| 315022 | 15    | 18.1  | 21.9  | 23.5  |
|        |       |       |       |       |
| 290838 | 9     | 13.4  | 13.9  | 12.7  |
| 440149 | 6.4   | 7.9   | 8.5   | 7.6   |
| 343943 | 10.3  | 9.4   | 10.1  | 12.5  |
| 340121 | 51.9  | 54.7  | 53.5  | 64.3  |
| 323574 | 8.2   | 7.6   | 10.6  | 8     |
| 280562 | 23.2  | 18.9  | 19.1  | 23.1  |
| 399321 | 18.7  | 19.5  | 19.9  | 20.6  |
| 350612 | 1.3   | 2.9   | 2.7   | 5.5   |
|        |       |       |       |       |
| 339960 | 62.8  | 80.8  | 91.1  | 86.2  |
| 337236 | 12.5  | 12.9  | 12    | 12.8  |
| 318790 | 2.9   | 8.1   | 7.2   | 8.1   |
| 386140 |       |       | 2.1   | 1.5   |
| 355256 | 1.9   |       |       |       |
| 356315 | 2.6   | 1.8   | 2     | 2     |
| 430385 | 34.8  | 41.7  | 38.6  | 49.7  |
| 445170 | 2.4   | 2.6   | 1.8   | 2.5   |
| 426916 | 46.3  | 59.3  | 47.7  | 38    |
| 426839 | 60.8  | 69.4  | 62.5  | 62.1  |
| 434059 | 21.8  | 34.2  | 35.1  | 35.7  |
| 418452 | 5.4   | 5.6   | 3.1   | 2.2   |
| 319835 | 11.5  | 14.4  | 12.7  | 11.2  |
| 290125 | 2.8   | 2.7   | 2.3   | 2.8   |
| 474711 | 84.2  | 92.7  | 81.5  | 93.4  |
| 307990 | 17.2  | 12.6  | 5.9   | 11.3  |
| 318471 | 2.9   | 3.4   | 5.1   | 2.4   |
| 467595 | 15.6  | 10.6  | 11.1  | 9.7   |
| 318433 | 21.4  | 19.5  | 20.6  | 25.4  |
| 265901 | 7.1   | 10.6  | 8.8   | 7.4   |
| 338819 | 17.3  | 16    | 22    | 16    |
| 338958 | 26.2  | 30.4  | 28.5  | 31.7  |
| 338613 | 46.3  | 57.3  | 39.4  | 48.6  |
| 462572 | 6.7   | 6.3   | 3.2   | 5.2   |
| 341076 | 156.7 | 124.4 | 126.9 | 96.2  |
| 259381 | 70.9  | 83.2  | 81.3  | 87.8  |
| 287202 | 40.2  | 51    | 44.1  | 51.2  |
| 385057 | 2     | 1.6   | 2.4   | 2.2   |
| 409605 | 5.4   | 3.1   | 3     | 5.6   |
| 382392 | 11.9  | 11    | 12.8  | 8.7   |
| 339583 | 55.5  | 40.7  | 33.8  | 40.9  |
| 472327 | 3.4   | 8.3   | 6.1   | 5.9   |
| 458120 | 6.6   | 7.4   | 6.2   | 6.3   |
| 311029 | 37.2  | 51.8  | 53.2  | 51.3  |
| 307996 | 69.9  | 82    | 61.9  | 64.2  |
| 290241 | 5.7   | 10.2  | 5.3   | 14    |
| 372093 | 65    | 83.4  | 76.2  | 78.8  |
| 466655 | 5.3   | 5.3   |       | 2.7   |
| 341084 | 12.6  | 14.7  | 11.4  | 11.8  |

|        |      |      |      |      |
|--------|------|------|------|------|
| 339589 | 66.4 | 74.8 | 66.9 | 59.7 |
| 450473 | 2.2  | 1.9  | 2.3  | 3.4  |
| 393722 | 71.9 | 67.4 | 42   | 60   |
| 401668 | 12.5 | 9.6  | 10   | 13.1 |
| 317146 | 10.7 | 12.1 | 11.2 | 11.9 |
| 259387 | 15.9 | 16   | 18.2 | 16.1 |
| 453146 | 19.8 | 18.6 | 22.6 | 16.4 |
| 434063 | 7.9  | 8.9  | 9.3  | 11.7 |
| 423810 | 43.7 | 42.5 | 27   | 37.6 |
| 451148 | 7.5  | 8.6  | 14.7 | 12.2 |
| 316173 | 19.6 | 32   | 17.6 | 25.1 |
| 409532 | 3.1  | 2.8  | 2.4  | 3.3  |
| 356319 | 6    | 3.5  | 2    | 3.1  |
| 373212 | 22.7 | 24.6 | 20.4 | 21.2 |
|        |      |      |      |      |
| 308017 | 13   | 10.9 | 10.8 | 10.4 |
| 448013 | 3.2  | 7.7  | 7    | 3.2  |
| 448013 | 3.2  | 7.7  | 7    | 3.2  |
| 408563 | 5.7  | 7.7  | 8.1  | 8.2  |
| 429166 | 1.9  | 5.6  | 2.6  | 4.7  |
| 337624 | 63.5 | 77.1 | 58.1 | 66.7 |
| 384361 | 8.5  | 7.6  | 13.9 | 8.2  |
| 384284 | 16.9 | 13.6 | 20.1 | 9.3  |
| 384250 | 3    | 2.5  | 2.9  | 2.5  |
| 384242 | 7.2  | 5.8  | 8.3  | 5.6  |
| 384201 | 9.6  | 9    | 10.5 | 7.1  |
| 384151 | 8.5  | 9.4  | 10.5 | 14.3 |
| 383418 | 2.2  |      | 1.5  |      |
| 383968 | 2.6  | 3.2  | 3.3  | 3    |
| 383864 | 6.7  | 5.9  | 8.8  | 5.7  |
| 383730 | 16   | 13.9 | 16   | 17.1 |
| 453098 | 72.6 | 63.7 | 43.7 | 45.8 |
|        |      |      |      |      |
| 453098 | 72.6 | 63.7 | 43.7 | 45.8 |
| 394099 | 23.7 | 15.7 | 21.2 | 21.3 |
| 394614 | 69.8 | 60.4 | 67.7 | 62.6 |
| 389974 | 10.5 | 8.7  | 11.9 | 11.5 |
| 389922 | 16.7 | 19.2 | 19.2 | 19.4 |
| 389871 | 7.6  | 6.4  | 9.2  | 7.9  |
| 389817 | 7.2  | 7.8  | 8.4  | 6.9  |
| 389758 | 5.7  | 2.4  | 2.3  | 5.1  |
| 389706 | 2.9  | 5.6  | 5.5  | 6.3  |
| 389643 | 3.4  | 1.8  |      | 5.5  |
| 391536 | 6.6  | 5.8  | 5.6  | 5.8  |
| 363361 | 2.1  |      |      | 1.8  |
| 363470 | 2.1  | 1.7  |      |      |
| 365708 | 3    | 2.2  | 1.9  | 2.1  |
| 365591 |      |      | 1.8  |      |
| 365503 | 1.6  | 1.4  |      | 1.7  |
| 365407 | 1.5  | 2.3  | 1.6  | 2    |
| 365299 | 2.1  | 3.4  | 1.9  | 2.4  |
| 365169 | 2.4  | 1.8  | 1.3  | 2.8  |

|        |      |      |       |      |
|--------|------|------|-------|------|
| 365076 | 2.3  | 5.2  | 2.9   | 2.9  |
| 364975 | 10.2 | 10.9 | 12.7  | 11.8 |
| 365838 | 2.5  | 4.9  | 6.1   | 5.6  |
| 364826 | 7.9  | 2.5  | 6.5   | 3.1  |
| 364732 | 6.1  | 5.6  | 5.9   | 2.8  |
| 364652 | 2.7  | 2.8  | 2.3   | 5.2  |
| 364635 | 15.9 | 16   | 15.3  | 14.2 |
| 364518 | 2.1  | 5.6  | 3.4   | 2.8  |
| 364504 | 14.1 | 14.3 | 11.9  | 14.5 |
| 364430 | 9.4  | 7.2  | 7.7   | 10   |
| 364416 | 10   | 9.4  | 10.5  | 11.4 |
| 364333 | 19.6 | 16.6 | 18.5  | 17.1 |
| 364319 | 13.8 | 11.9 | 12.3  | 13.2 |
| 364236 | 10.6 | 10   | 13    | 11.2 |
| 364223 | 13.1 | 14   | 12.8  | 15.5 |
| 364211 | 8    | 9.8  | 13.4  | 8.8  |
| 354879 | 10.6 | 13.7 | 14.2  | 12.9 |
| 354751 | 16.9 | 16   | 20.3  | 17.1 |
| 354731 | 26.9 | 26.7 | 34.9  | 31.2 |
| 354915 | 14.2 | 12.2 | 15.6  | 13.9 |
| 453816 | 30.8 | 27.1 | 23.3  | 25.2 |
| 374423 | 33.4 | 50.3 | 57.5  | 44.6 |
| 369864 | 98.8 | 67.9 | 88.7  | 89.7 |
| 369862 | 15.4 | 12.4 | 15.9  | 19.2 |
| 367543 | 8.5  | 7.2  | 9.7   | 7.5  |
| 367369 | 2.4  | 1.4  |       | 2.8  |
| 369339 | 90.5 | 87.7 | 72.2  | 83.7 |
| 367652 | 14.1 | 12.4 | 16.1  | 14.6 |
| 367650 | 13.5 | 26.4 | 27    | 19.3 |
| 371791 | 51.3 | 44.4 | 47.7  | 49.1 |
| 371679 | 49.4 | 50.6 | 48.4  | 51.7 |
| 424313 | 40   | 39.4 | 48.7  | 42.3 |
| 424371 | 64.2 | 75.4 | 86.6  | 66.2 |
| 424370 | 90.3 | 96.7 | 131.4 | 93.2 |
| 424467 | 19.6 | 16.9 | 18.8  | 19.4 |
| 424423 | 30.6 | 29.4 | 28.7  | 32.4 |
| 440966 | 9.9  | 9.5  | 13.7  | 6.1  |
| 439613 | 3.3  | 2.6  | 2.3   | 5.4  |
| 439528 | 31.8 | 25.5 | 24    | 28   |
| 439426 | 8.6  | 12.2 | 11.8  | 16   |
| 442410 | 69.8 | 57.9 | 60.2  | 55.6 |
| 441573 |      |      | 5.7   |      |
| 441886 | 7.4  | 8.4  | 10    | 9.8  |
| 404950 | 43.7 | 46.5 | 40.5  | 41.3 |
| 404957 | 41.3 | 30.8 | 35.1  | 32.5 |
| 447784 | 3.1  | 2    | 3     | 2.9  |
|        |      |      |       |      |
| 407383 | 14.1 | 9    | 9.7   | 8    |
| 448542 | 11.1 | 8.6  | 16.4  | 7.3  |
| 403015 | 24.4 | 21.9 | 24.6  | 23.4 |
| 448090 | 30.3 | 17   | 25.9  | 21   |
| 402761 | 13   | 11.4 | 11.6  | 12.2 |

|        |       |       |       |       |
|--------|-------|-------|-------|-------|
| 448353 | 14.1  | 10.6  | 14.5  | 11.9  |
| 402667 | 11.7  | 12.2  | 12.5  | 11.8  |
| 402530 | 26.2  | 27.7  | 22.4  | 21.2  |
| 402434 | 30.2  | 26.6  | 23.2  | 24.3  |
| 402426 | 10.7  | 11.1  | 10.8  | 8.7   |
| 402419 | 75.7  | 71.1  | 69.8  | 65.3  |
| 402289 | 97.5  | 79.1  | 87.3  | 82.4  |
| 416262 | 2.2   | 2.5   | 5.6   | 3.1   |
| 416125 | 6.6   | 6.6   | 10.4  | 8.9   |
| 416022 | 8.3   | 7.5   | 8     | 9     |
| 446293 | 5.6   | 7     | 3.1   | 17    |
| 415918 | 2     | 3     | 2.1   | 2.4   |
| 474589 | 14.4  | 13.7  | 15.2  | 19.3  |
|        |       |       |       |       |
| 333944 | 237.4 | 248.4 | 254   | 255.8 |
| 283038 | 46.2  | 69.1  | 66.5  | 32.8  |
| 474762 | 414   | 485.7 | 516.1 | 643.5 |
| 474754 | 170.3 | 197.9 | 196.5 | 277.9 |
| 310807 | 84.2  | 58.8  | 63.5  | 58.8  |
| 310444 | 15    | 13.6  | 15.8  | 17.1  |
| 310688 | 55.5  | 69.7  | 89.4  | 84.9  |
| 467693 | 12.3  | 7.6   | 9.1   | 9.3   |
| 467384 | 14.3  | 9.2   | 13.5  | 8.9   |
| 467208 | 8.7   | 5.4   | 5.9   | 8.6   |
| 467542 | 96.2  | 85.7  | 102.4 | 82.6  |
| 467549 | 30.7  | 30.6  | 32.3  | 33.6  |
| 467557 | 22.4  | 18.9  | 19.4  | 20.7  |
| 475220 | 17.9  | 24.1  | 22.2  | 29.1  |
| 475223 | 143.8 | 164   | 158.8 | 196.2 |
| 342661 | 47.6  | 32.3  | 28.7  | 31    |
| 342658 | 16.6  | 11.6  | 12.8  | 11.6  |
| 342494 | 13.9  | 14.3  | 17.7  | 15.4  |
| 475172 | 170.4 | 201   | 227.2 | 230.3 |
| 475176 | 14.7  | 12.5  | 14.7  | 16.7  |
| 347163 | 51.4  | 47.9  | 49.8  | 48.2  |
| 347067 | 19    | 16.8  | 22.4  | 18.4  |
| 459644 | 33.3  | 24.5  | 24.1  | 28.1  |
| 459650 | 23.2  | 17.6  | 17.1  | 15.3  |
| 459511 | 21.4  | 13.3  | 17.8  | 15.2  |
| 476077 | 7     | 5.3   | 6.5   | 7.2   |
| 339921 | 50.3  | 61.1  | 68    | 58.6  |
| 339929 | 19.6  | 25.3  | 30    | 28.2  |
| 476068 | 15.8  | 15.3  | 12.7  | 13.2  |
| 351299 | 9.3   | 9     | 9.9   | 8.2   |
| 280401 | 79.5  | 37.2  | 49.7  | 30.4  |
| 314059 | 28    | 34.8  | 42.2  | 39.9  |
| 448648 | 15.5  | 16.2  | 19.7  | 18.2  |
| 448007 | 18.3  | 16    | 19.4  | 17.9  |
| 389585 | 3.2   |       | 2     | 1.8   |
| 424379 | 7.7   | 7.5   | 10.6  | 8.9   |
| 336826 | 33.5  | 36.4  | 41    | 38.4  |
| 310990 | 16.1  | 13.9  | 10.3  | 12.4  |

|        |       |       |       |       |
|--------|-------|-------|-------|-------|
| 441050 | 2.3   | 2.2   | 5.6   | 2     |
| 384468 | 6.3   | 2.9   | 1.5   | 2.9   |
| 465966 | 1.4   |       |       |       |
| 448470 | 74.4  | 56.7  | 45.1  | 53.4  |
| 399125 | 24.1  | 21.8  | 20.4  | 41.1  |
| 383934 | 2.3   |       |       |       |
| 307159 | 26.5  | 33.7  | 50.3  | 30    |
| 416392 |       |       | 2.4   | 2.3   |
| 366347 |       | 2.6   | 2     | 1.5   |
| 389889 | 1.6   | 1.5   | 3.2   | 2.7   |
| 384072 | 1.6   | 1.9   | 2.9   | 2.6   |
| 448511 | 7.7   | 8.5   | 9.8   | 8.3   |
| 341786 | 8.2   | 7.8   | 7     | 6.7   |
| 261781 | 99    | 82.8  | 100.4 | 89    |
| 307241 | 17.9  | 17.7  | 18.7  | 14.3  |
| 398772 | 21.6  | 14.5  | 18.3  | 18    |
| 314106 | 14.7  | 16.9  | 17.8  | 17.1  |
| 339917 | 50.7  | 43.3  | 50.2  | 38.8  |
| 370131 | 74.2  | 76.2  | 59    | 82.8  |
| 261970 | 15.5  | 17.6  | 23.4  | 27.9  |
| 381700 | 1.8   |       | 2.1   |       |
| 453680 | 36.2  | 31.8  | 39.4  | 39.1  |
| 281636 | 31.2  | 25.2  | 26.3  | 29.8  |
| 440917 | 16.8  | 12.4  | 18.5  | 11.9  |
| 354594 | 1.6   | 2.6   | 5.1   | 2     |
|        |       |       |       |       |
| 314564 | 9.9   | 7.9   | 8.7   | 10.9  |
| 447904 | 22.9  | 20.7  | 22.9  | 39.7  |
| 447967 | 12.3  | 14.1  | 23    | 15.6  |
| 394285 | 34.1  | 31    | 30.2  | 35.9  |
| 402750 | 16.7  | 14.6  | 12.3  | 13.5  |
| 389555 | 2     | 2.5   |       | 1.5   |
| 305654 | 6.2   | 9.7   | 7.5   | 7.3   |
| 374417 | 70.7  | 77    | 90.9  | 77.4  |
| 308914 | 23.3  | 34.2  | 44.4  | 32.9  |
| 261884 | 22    | 22.5  | 29.7  | 28.7  |
| 394154 | 18.6  | 13.8  | 20.6  | 14.7  |
| 416537 |       | 1.7   | 1.8   | 1.7   |
| 285124 | 41    | 30.4  | 35.1  | 35.5  |
| 466662 | 1.2   | 1.8   | 3     | 1.7   |
| 264877 | 23.7  | 31.8  | 31.6  | 30.9  |
| 261396 | 20.9  | 22.2  | 26.9  | 26.9  |
| 313567 | 10.3  | 13.4  | 12.6  | 10.4  |
| 441083 | 3     | 3.3   | 8.4   |       |
| 310162 | 14    | 11.6  | 13.5  | 13.4  |
| 371693 | 124.6 | 104.1 | 99.2  | 97.8  |
| 261896 | 37.3  | 27.8  | 33.4  | 34.8  |
| 260496 | 67.6  | 60.7  | 63.2  | 68.3  |
| 312579 | 63.8  | 50.7  | 87.4  | 63.4  |
| 308577 | 98.2  | 106.3 | 125.1 | 114.4 |
| 307831 | 25.1  | 24.3  | 24.8  | 25.8  |
| 467839 | 6.6   | 6.2   | 3.5   | 6.4   |

|        |       |       |       |       |
|--------|-------|-------|-------|-------|
| 389936 | 1.9   |       | 3     | 2.2   |
| 394212 | 102.4 | 68.5  | 68.8  | 69.7  |
| 351201 | 29.1  | 34.3  | 42.9  | 36.6  |
| 284939 | 128.7 | 145.6 | 174.8 | 155.7 |
| 439400 |       |       |       | 2.3   |
|        |       |       |       |       |
| 373781 | 125.2 | 78    | 135.9 | 127.5 |
| 354411 |       | 1.4   |       |       |
| 284956 | 221.5 | 224.9 | 202.6 | 180   |
| 260502 | 1.5   | 1.6   | 2     | 1.7   |
|        |       |       |       |       |
| 285381 | 107.8 | 94.2  | 106.6 | 104.2 |
| 313075 | 12.7  | 15.2  | 17.9  | 17    |
| 393762 | 10.7  | 10.5  | 15.8  | 14.6  |
| 249193 | 23.3  | 27    | 34.5  | 36.2  |
| 313088 | 78    | 71.7  | 73.5  | 86.9  |
| 305296 | 20.4  | 18.4  | 13.5  | 17.5  |
| 433984 | 6.3   | 2.9   | 3     | 2.6   |
| 448496 | 11.4  | 8.9   | 10.3  | 9     |
| 453743 | 56.6  | 49.8  | 53.7  | 48.6  |
| 309230 | 55.2  | 35.2  | 57.5  | 46.6  |
| 442028 | 5.1   | 3.2   | 1.9   | 3.2   |
| 285120 | 28.5  | 26.6  | 30.5  | 34.2  |
| 371808 | 244.7 | 193.7 | 207.8 | 182.3 |
| 465894 | 1.6   |       | 4.7   |       |
| 351354 | 93.1  | 74.6  | 86.3  | 86.6  |
| 447973 | 18.1  | 12    | 14.8  | 9.6   |
| 351339 | 2.6   | 1.7   | 2.2   | 3.4   |
|        |       |       |       |       |
| 424316 | 11    | 11.4  | 10.8  | 8     |
| 452102 | 2.1   |       |       |       |
| 386695 | 9.9   | 6.7   | 8.1   | 7.1   |
| 385085 | 2.2   |       |       | 1.9   |
| 381402 | 9.8   | 8.1   | 9.6   | 7.2   |
| 394060 | 48.9  | 45.7  | 48.5  | 44.3  |
| 393893 | 73.6  | 49.3  | 47.9  | 61.2  |
| 389516 | 2     | 3.1   | 5.6   | 2.5   |
| 389456 | 2.5   | 1.9   | 5     |       |
| 389571 |       | 1.8   |       |       |
| 389395 | 19.4  | 18.8  | 23    | 19    |
| 389368 | 7.7   | 6.5   | 9.8   | 7.7   |
| 389359 | 58.5  | 44.4  | 48    | 59.3  |
| 389314 | 24.5  | 27.1  | 43.6  | 36.1  |
| 389312 | 19.3  | 20.4  | 29.5  | 19.8  |
| 393395 | 12.4  | 6.7   | 8.2   | 6.7   |
| 393387 | 52.7  | 47.5  | 55.3  | 39    |
| 363367 | 6     | 5.4   | 7.2   | 3.1   |
|        |       |       |       |       |
| 374801 | 32.2  | 22.8  | 26.8  | 29.6  |
| 369956 | 7.1   | 6.8   | 8.9   | 2.2   |
| 369946 | 71.8  | 77.9  | 82.6  | 78.1  |
| 370749 | 37.8  | 22.4  | 26.5  | 36.7  |



|        |       |      |       |       |
|--------|-------|------|-------|-------|
| 370808 | 117.4 | 86.8 | 65.9  | 117.2 |
| 424032 | 23.3  | 13.5 | 10.6  | 19.8  |
| 423927 | 12.9  | 11.8 | 15.5  | 10.9  |
| 422403 | 1.5   | 1.9  |       | 2.6   |
| 422404 | 26    | 18   | 22.4  | 22.2  |
| 423702 | 11.3  | 13.1 | 15.4  | 10.6  |
| 437164 | 20.5  | 17.1 | 21.3  | 19.1  |
| 437266 | 12.8  | 8.4  | 11.1  | 9.5   |
| 422217 | 81.2  | 76.5 | 105.4 | 74.2  |
| 448089 | 10.1  | 13.5 | 20.1  | 10.6  |
| 448341 | 14.4  | 14.8 | 17.4  | 15.6  |
| 419155 | 6.1   | 3.1  | 9     | 3.1   |
| 419029 | 10.9  | 11   | 21.7  | 8.7   |
| 418917 | 3.7   | 5.1  | 10.5  | 6.3   |
| 418801 | 7.4   | 6.8  | 10.5  | 5.6   |
| 418636 | 2.3   | 2.2  | 8.6   | 1.7   |
| 419271 | 1.8   | 2.5  | 5.6   |       |
| 422044 | 29.3  | 35.5 | 36.4  | 35.2  |
| 422043 | 80.9  | 95.2 | 120.5 | 100.3 |
| 421771 |       | 1.5  |       |       |
| 421646 | 2.8   | 6    | 3.2   | 6.2   |
| 421610 | 6.1   | 6.2  | 8.2   | 10    |
| 421888 | 24.9  | 25.6 | 27.5  | 25.3  |
| 422201 | 13.9  | 16   | 21    | 15.3  |
| 422142 | 13.6  | 10.7 | 12    | 15.5  |
| 411027 | 77.5  | 59.4 | 97.2  | 56    |
| 410970 | 21.1  | 19.8 | 28.2  | 16.1  |
| 410914 | 9.7   | 9    | 5.9   | 6.4   |
| 410894 | 46.2  | 40.3 | 53.4  | 40.1  |
| 410860 | 58.6  | 53.4 | 87    | 49.3  |
| 410800 | 17.4  | 16   | 28    | 15.1  |
| 410646 | 8     | 10.8 | 16.4  | 9     |
| 410628 | 5.1   | 2.4  | 2.2   |       |
| 411056 | 6.3   | 2.6  | 6     | 2.9   |
| 411348 | 7.9   | 8.2  | 10.9  | 7     |
| 411346 | 19.4  | 17.5 | 25.5  | 19.8  |
| 411208 | 22.2  | 17.9 | 27.1  | 18    |
| 411149 | 6.7   | 7    | 11.1  | 5.5   |
| 410496 | 42.8  | 33.2 | 49.3  | 39.9  |
| 466074 | 6.4   | 3.4  | 5.9   | 2.3   |
| 323589 | 38.9  | 33.3 | 34    | 44.4  |
| 323577 | 6.9   | 5.9  | 6.7   | 2.2   |
| 323398 | 65.4  | 59.8 | 71.2  | 55.5  |
| 466237 | 10.2  | 9.2  | 10.5  | 8.3   |
| 325830 | 45.2  | 37.9 | 43.7  | 38.6  |
| 325818 | 120.7 | 96.4 | 121.5 | 96.5  |
| 474527 | 41.4  | 44   | 56.1  | 66.3  |
| 326063 | 28.8  | 18.3 | 27.3  | 23.5  |
| 326053 | 37.5  | 28.6 | 32.8  | 31.8  |
| 325968 | 50.4  | 36.9 | 40.7  | 31.8  |
| 325957 | 82.4  | 64   | 77.1  | 58    |
| 323384 | 24    | 22.4 | 31.2  | 20.4  |

|        |       |       |       |       |
|--------|-------|-------|-------|-------|
| 291244 | 81.6  | 68.4  | 96.3  | 73.9  |
| 474077 | 63.5  | 55.3  | 51.8  | 48.6  |
| 291299 | 85    | 71.7  | 88.6  | 67    |
| 474090 | 120   | 109.3 | 107.7 | 103.3 |
| 291382 | 46.1  | 37.9  | 52.4  | 40.6  |
| 474332 | 23.7  | 28.9  | 41.9  | 40.5  |
| 322617 | 29.1  | 21.8  | 25.2  | 17.1  |
| 322614 | 30.9  | 23.9  | 27.6  | 20.8  |
| 322475 | 33.1  | 31.3  | 34.1  | 25.6  |
| 322471 | 41.7  | 31.8  | 43.4  | 30.7  |
| 334869 | 25.4  | 31    | 55.8  | 11.9  |
| 335060 | 153.3 | 133.6 | 146.6 | 160.8 |
| 474847 | 182.2 | 163.9 | 303.5 | 178.2 |
| 474844 | 80.3  | 75.8  | 119.5 | 77.5  |
| 334194 | 154.7 | 172.4 | 108.6 | 186   |
| 474844 | 80.3  | 75.8  | 119.5 | 77.5  |
| 335641 | 124.8 | 101.6 | 98.6  | 109.9 |
| 474828 | 406.8 | 387.5 | 421.2 | 433.3 |
| 474833 | 6.7   | 3.3   | 5.6   | 5.8   |
| 474838 | 658.8 | 621.7 | 713.9 | 727.8 |
| 474805 | 38.2  | 34.9  | 50.9  | 35.5  |
| 474798 | 53.5  | 50.3  | 65.9  | 53.1  |
| 469658 | 19.9  | 19.4  | 18.2  | 15    |
| 469664 | 70    | 49.8  | 65    | 41.3  |
| 292986 | 12.2  | 10.5  | 10.8  | 7.8   |
| 293018 | 27.5  | 21.8  | 31.5  | 23.1  |
| 293101 |       | 1.5   | 2.4   |       |
|        |       |       |       |       |
| 294259 | 6.4   | 7.1   | 13.5  | 9     |
| 294352 | 64.1  | 49.5  | 60    | 48.8  |
| 294380 | 18.7  | 16.4  | 12.5  | 14.4  |
| 294505 | 60.1  | 53.5  | 65.8  | 48.1  |
| 294531 | 32.3  | 27.1  | 34    | 28.3  |
| 294620 | 55.7  | 47.6  | 60.2  | 50.4  |
| 294645 | 29.7  | 24.9  | 28.7  | 22    |
| 293593 | 31.6  | 23.6  | 28.3  | 23.5  |
| 473920 | 33.6  | 35.3  | 33.3  | 35    |
| 473897 | 13.1  | 13.6  | 13.7  | 12.7  |
| 318558 | 18.5  | 15.5  | 18.7  | 15.5  |
| 318483 | 12.1  | 10.6  | 14.2  | 10.7  |
| 294766 | 52.4  | 47.9  | 59    | 46.7  |
| 294793 | 40.9  | 43    | 49.6  | 36.7  |
| 297725 | 63.3  | 27.6  | 34.2  | 33.5  |
| 297869 | 34.9  | 11.2  | 16.3  | 16.9  |
| 468352 | 5.5   | 2.3   | 6.8   | 3.3   |
| 295309 | 36.8  | 31.4  | 39.3  | 24.8  |
| 295397 | 45.6  | 35.9  | 43.8  | 29.5  |
| 295413 | 18    | 17.3  | 17.9  | 14.6  |
| 295501 | 29.2  | 27.6  | 25.5  | 20.6  |
| 295643 | 11.3  | 7.8   | 11.3  | 6.7   |
| 316148 | 13.8  | 11.1  | 12.2  | 10    |
| 473236 | 5.1   | 3     | 6.7   | 5.9   |

|        |       |       |       |       |
|--------|-------|-------|-------|-------|
| 295294 | 39.4  | 30.9  | 37.7  | 25.2  |
| 295212 | 41.6  | 32.9  | 35.4  | 32.7  |
| 295192 | 51.9  | 42.1  | 49.5  | 39.8  |
| 316451 | 9.1   | 10.9  | 26.4  | 66.4  |
| 294897 | 10.7  | 10.5  | 13.9  | 11.3  |
| 316329 | 40.8  | 32.6  | 37.6  | 38    |
| 294919 | 71.1  | 59    | 70.3  | 53.3  |
| 294949 | 34    | 26.7  | 32.9  | 27.7  |
| 295088 | 36.5  | 26.4  | 31.7  | 28.1  |
| 316289 | 30.3  | 26.8  | 26.2  | 26.7  |
| 295109 | 15.9  | 16.3  | 16    | 17    |
| 296770 |       |       | 2.1   | 2.5   |
| 296817 | 20    | 17.1  | 25.1  | 17.6  |
| 296835 | 47.2  | 37.5  | 46.9  | 37.6  |
| 296849 | 28.7  | 25.6  | 21.4  | 12    |
| 296716 | 70.5  | 65.9  | 51.4  | 40.6  |
| 252651 | 126   | 97.5  | 130.3 | 97.7  |
| 475192 | 26.1  | 22.9  | 25.9  | 20.1  |
| 345275 | 31.5  | 21.3  | 27    | 20.1  |
| 342927 | 75.4  | 56    | 76.2  | 53.2  |
| 350966 | 13.9  | 9.4   | 12    | 9.2   |
| 350976 | 2     | 2     | 1.9   |       |
| 266791 | 91.1  | 80.6  | 74.1  | 65.4  |
| 266565 | 39.9  | 43.5  | 58.6  | 44.3  |
| 266788 | 24.1  | 19.7  | 25.4  | 21.9  |
| 266685 | 63.8  | 58.5  | 59.8  | 49.8  |
| 266695 | 30.9  | 31.5  | 35.3  | 29.3  |
| 266702 | 45.1  | 35.6  | 44.2  | 38.7  |
| 347739 | 11.9  | 6     | 10.3  | 8.5   |
| 258511 | 211.4 | 178.9 | 240.2 | 176.1 |
| 347739 | 11.9  | 6     | 10.3  | 8.5   |
| 349417 | 6.3   | 5.6   | 6.7   | 2.4   |
| 349299 | 12.8  | 12.4  | 14.3  | 12    |
| 475392 | 10    | 7     | 9.7   | 5.4   |
| 348744 | 15.2  | 13.7  | 18.8  | 12.1  |
| 349118 | 5.6   | 2.5   | 2.8   | 2.1   |
| 348703 | 2.2   | 2.7   | 2.7   | 1.8   |
| 348612 | 24.8  | 16.8  | 24.2  | 18.2  |
| 349013 | 18.1  | 10.7  | 18    | 12.5  |
| 348977 | 9.3   | 5.1   | 10.1  | 7.5   |
| 348895 | 36.5  | 34    | 36    | 26.5  |
| 348856 | 15.3  | 12    | 15.6  | 11.5  |
| 349148 | 16.1  | 17    | 17.8  | 13.4  |
| 475327 | 55.9  | 57.1  | 82    | 51.1  |
| 475307 | 67.3  | 60.1  | 89.3  | 66.7  |
| 475328 | 7.2   | 2.8   | 7.4   | 6.8   |
| 475025 | 86.9  | 97.5  | 116   | 96.9  |
| 272063 | 22.4  | 20.8  | 20.6  | 13.5  |
| 272349 | 5.5   | 5.7   | 7.5   | 6.1   |
| 272349 | 5.5   | 5.7   | 7.5   | 6.1   |
| 475008 | 132.1 | 112.2 | 122.1 | 116.9 |
| 475028 | 31    | 34    | 40.8  | 29    |

|        |       |       |       |       |
|--------|-------|-------|-------|-------|
| 462662 | 5.1   | 3.3   | 7.5   | 6.3   |
| 462779 | 6.5   | 6.5   | 6.3   | 6.6   |
| 341249 | 44.6  | 38.1  | 46.1  | 37.8  |
| 475071 | 26.7  | 22.7  | 24.4  | 18    |
| 342774 | 119.5 | 154.7 | 232.9 | 159   |
| 381469 | 2.6   | 2.7   | 6.4   | 2.9   |
| 468193 | 10.3  | 9.9   | 19.6  | 11.8  |
| 267179 | 13.7  | 11.5  | 16.4  | 13.8  |
| 272238 | 15.8  | 16.3  | 18.8  | 10.9  |
| 298859 | 5.7   | 2.2   | 6.5   | 1.7   |
| 410837 | 5.6   | 4.9   | 10.4  | 6     |
| 423729 | 2.3   | 1.9   | 2.4   | 2.2   |
| 291287 | 46.2  | 29.2  | 45.2  | 30.7  |
| 266579 | 30.8  | 29    | 35.4  | 34.1  |
| 266794 | 97    | 82    | 78.6  | 78.9  |
| 269363 | 2.9   | 2.6   | 2.4   | 7     |
| 272238 | 15.8  | 16.3  | 18.8  | 10.9  |
| 474262 | 1.9   | 1.5   | 1.8   | 1.8   |
| 448195 | 8.6   | 5.1   | 10.3  | 6.1   |
| 323028 | 11.8  | 12.6  | 14    | 7.2   |
| 321674 |       | 2.5   | 2.3   | 2     |
| 402457 | 16.9  | 12.4  | 14.8  | 15    |
| 261386 | 195.9 | 151.9 | 218.1 | 120.4 |
| 375726 | 38.1  | 35.5  | 39    | 42.6  |
| 386551 | 5.6   | 2.8   | 1.8   | 3     |
| 377288 | 18.6  | 18.7  | 17.7  | 19.2  |
| 436715 | 6.6   | 2.6   | 2.7   | 5.9   |
|        |       |       |       |       |
| 374654 | 21.9  | 19.2  | 17    | 17.1  |
| 410736 | 1.6   | 1.5   | 1.8   | 2     |
| 450129 | 20.4  | 15.5  | 19.4  | 21    |
| 261389 | 35    | 29    | 47.6  | 26.3  |
| 297739 | 22.8  | 8.5   | 15.1  | 9.2   |
| 290143 | 6.5   | 5.3   | 9.1   | 5.6   |
| 375732 | 62.3  | 63.6  | 43.9  | 68.8  |
| 448501 | 2.7   | 1.7   | 7.4   | 2.8   |
| 436927 | 8.2   | 2.3   | 8.4   | 3.3   |
| 423933 | 19.2  | 14.5  | 16.1  | 14.4  |
| 297106 | 7.1   | 4.8   | 7.5   | 6.6   |
| 469501 | 5.1   | 5.9   | 6.7   | 6.9   |
| 334382 | 82.2  | 95.1  | 88.8  | 42.5  |
| 466287 | 15.4  | 12    | 14.3  | 12.8  |
| 291090 | 54.7  | 53.3  | 53.1  | 59.7  |
| 291129 | 173.4 | 128.4 | 115.4 | 126   |
| 317476 | 28.8  | 26.1  | 29.8  | 30    |
| 345121 | 12.7  | 12.6  | 15.4  | 15.2  |
| 318623 | 11.4  | 10.9  | 8.3   | 7.2   |
| 252530 | 113.4 | 90.7  | 124.8 | 94.7  |
| 291489 | 24.6  | 22.6  | 27.8  | 19.2  |
| 295071 | 10.1  | 10.6  | 12.3  | 9.4   |
| 430148 | 11.6  | 9.4   | 10.1  | 9.7   |
| 375033 | 36.2  | 31.5  | 28.1  | 40.9  |

|        |       |       |       |       |
|--------|-------|-------|-------|-------|
| 345273 | 101.8 | 69    | 79.9  | 54.7  |
| 271926 | 13.1  | 13.2  | 18.3  | 9.9   |
| 348983 |       |       | 1.6   |       |
| 326458 | 10.6  | 8.8   | 12.2  | 9.2   |
| 271816 | 5.5   | 5.1   | 8.3   | 2.9   |
| 323216 | 15    | 9.7   | 16.2  | 12.4  |
| 271816 | 5.5   | 5.1   | 8.3   | 2.9   |
| 290893 | 8.2   | 4.9   | 8.6   | 6.2   |
| 423788 | 9.1   | 6.4   | 11.8  | 9     |
| 436831 | 2.7   | 6.4   | 1.6   | 1.7   |
| 388505 |       |       | 1.3   |       |
| 323721 | 2     | 1.7   | 3.1   | 2.4   |
| 411515 | 6.1   | 7.8   | 10.5  | 6.5   |
| 375758 | 43.5  | 33.3  | 27.6  | 33.5  |
| 258510 | 205.5 | 173.8 | 218.3 | 143.2 |
| 294229 | 6     | 5.4   | 6.4   | 7.1   |
| 281217 | 313.6 | 220.1 | 265   | 269.3 |
| 349260 |       |       |       | 1.5   |
| 449832 | 8.5   | 8.9   | 9.3   | 8.2   |
| 261277 | 168.8 | 173.9 | 238.6 | 194.1 |
| 266368 | 17.7  | 13.4  | 11.2  | 13.8  |
| 317480 | 3     | 2.6   | 5.6   | 6     |
| 286668 | 7.7   | 5.7   | 8.1   | 3.5   |
| 393720 | 7.6   | 8     | 9.5   | 7.9   |
| 398291 | 10.8  | 5.7   | 9.2   | 9     |
| 261495 | 54.9  | 39    | 57.6  | 45.2  |
| 410379 | 1.3   | 1.5   |       | 1.7   |
| 305840 | 73.5  | 66.2  | 81.3  | 73.9  |
| 438227 | 2.8   | 2.4   | 2.6   | 1.9   |
| 397564 | 6.5   | 2.8   | 6.5   | 3.1   |
| 394072 | 37.9  | 34.8  | 28.5  | 43.6  |
|        |       |       |       |       |
| 297098 | 17.5  | 18.6  | 20.8  | 18    |
| 295760 | 2.7   | 1.5   | 2.8   | 3.1   |
| 296694 | 6.2   | 2.8   | 2.3   | 2.6   |
| 436524 |       |       | 1.6   | 2.2   |
| 336051 | 12.2  | 11.4  | 15.2  | 14.4  |
| 436861 | 2.1   | 1.7   | 2.7   | 1.6   |
| 260921 | 75.5  | 75.2  | 92.9  | 74.4  |
| 411518 | 1.3   |       | 2.3   |       |
| 272216 | 17.2  | 13.1  | 13.6  | 12.8  |
| 473075 |       | 3.1   | 3.2   | 2.5   |
| 317256 | 5.4   | 5.1   | 2     | 2.7   |
| 291407 | 7.7   | 5.6   | 9     | 6.7   |
| 369760 | 43.9  | 47.1  | 49.6  | 38    |
| 449446 |       | 1.5   |       |       |
| 377289 | 2.9   | 5.7   | 6.6   | 6.6   |
| 383625 | 8.6   | 10.3  | 10.2  | 12.8  |
| 383727 | 5.7   | 3     | 4.9   | 6.6   |
| 383720 | 7.9   | 10.2  | 7.6   | 9     |
| 383629 | 7.5   | 11.2  | 11.3  | 10.8  |
| 385439 | 25.2  | 27.1  | 34.4  | 30.5  |

|        |       |       |       |       |
|--------|-------|-------|-------|-------|
| 385408 | 18.8  | 22.5  | 20    | 22.8  |
| 385110 | 25.1  | 20.9  | 24.9  | 20    |
| 385096 | 20.8  | 19.1  | 19.1  | 16.5  |
| 385014 | 17.2  | 19.9  | 22    | 20.3  |
| 385144 | 18.2  | 19.5  | 16.9  | 16.9  |
| 385524 | 2.9   | 2.2   | 3.3   | 2.5   |
| 379526 | 36.6  | 32.2  | 32.9  | 38.8  |
| 379642 | 15.5  | 11.5  | 11.9  | 10.2  |
| 394079 | 9.4   | 13.5  | 8.1   | 12.6  |
| 369553 | 154.1 | 168.9 | 208.9 | 173.8 |
| 370236 | 35.7  | 32.8  | 32.5  | 37.5  |
| 372632 | 56.7  | 51.1  | 46.3  | 52.5  |
| 372561 | 25.8  | 31.3  | 36.7  | 30.5  |
| 372544 | 90.8  | 90.6  | 88.9  | 86.2  |
| 372492 | 12.8  | 16.2  | 16.3  | 16    |
| 372469 | 49.8  | 44.8  | 44.1  | 39.5  |
| 372551 | 35.8  | 44.1  | 35.1  | 40.3  |
| 371107 | 72.4  | 68.3  | 53.6  | 67.7  |
| 428944 | 12    | 17.7  | 16.3  | 19.2  |
| 428916 | 49.1  | 77.3  | 73.7  | 92.6  |
| 438915 | 21.9  | 22.4  | 16.6  | 28.9  |
| 438899 | 31.8  | 35.9  | 31.3  | 36.2  |
| 404505 | 5.3   | 1.7   | 2.7   | 2.2   |
| 407623 | 2.1   | 2.1   | 2.2   | 1.7   |
| 407615 | 10    | 11.2  | 8.5   | 10.2  |
| 407515 | 10.8  | 13.4  | 12.5  | 11.4  |
| 407508 | 17.3  | 18    | 17.7  | 20.7  |
| 407500 | 20.9  | 20    | 17.7  | 16.2  |
| 407389 | 5.3   | 6     | 2.4   | 6.3   |
| 404096 | 17.6  | 19.4  | 28.7  | 22.6  |
| 446473 | 35.7  | 34.3  | 45    | 35.5  |
| 474522 | 87.6  | 83.4  | 77.2  | 78.8  |
| 474459 | 21.6  | 15.1  | 20.8  | 23.3  |
| 287402 | 24.1  | 23.9  | 23.9  | 26.1  |
| 326227 | 40.9  | 38.8  | 39.6  | 40.3  |
| 287401 | 28.5  | 31.4  | 29.6  | 31.5  |
| 287280 | 11.1  | 14.1  | 13.3  | 16    |
| 326127 | 37.4  | 45.4  | 55    | 50.1  |
| 290503 | 24.4  | 27.3  | 26.5  | 27.6  |
| 290512 | 22.7  | 24.8  | 21.2  | 19.4  |
| 321210 | 16.9  | 14.6  | 9     | 14.1  |
| 290377 | 9.1   | 7.5   | 12.5  | 5.6   |
| 322777 | 6.4   | 7     | 3.4   | 11    |
| 474328 | 13.7  | 14.6  | 11.9  | 15.4  |
| 322743 | 11.3  | 17.1  | 9.5   | 29.9  |
| 474373 | 121.3 | 131.3 | 115.8 | 133.8 |
| 322015 | 33.9  | 36.5  | 27    | 35    |
| 322014 | 67.8  | 71.2  | 57.6  | 65.6  |
| 336211 | 255.7 | 355.1 | 289.8 | 372.8 |
| 474757 | 47.7  | 61.3  | 56.9  | 68    |
| 474737 | 111.2 | 132.9 | 117.3 | 153.9 |
| 474797 | 126.5 | 131.3 | 112.6 | 144.6 |

|        |       |       |       |       |
|--------|-------|-------|-------|-------|
| 474809 | 63.1  | 71    | 65.1  | 72.2  |
| 292731 | 2.3   | 1.7   | 1.5   |       |
| 317867 | 19    | 22.8  | 25.4  | 24.7  |
| 317995 | 63.9  | 59.2  | 50.7  | 53.4  |
| 317992 | 28.8  | 22.8  | 23.6  | 27    |
| 299978 | 5.5   | 3     | 5.5   | 2.3   |
| 344503 | 27.7  | 28.9  | 21.4  | 28.4  |
| 350873 | 9.1   | 15.7  | 12.7  | 10.3  |
| 350891 | 19.1  | 22.6  | 24.7  | 31    |
| 350719 | 5.6   | 3     | 3     | 5.6   |
| 342501 | 2.8   | 5     | 5.2   | 5.3   |
| 343317 | 20.7  | 27.5  | 32.7  | 24.4  |
| 343130 | 2.3   | 5.1   | 2.6   | 6.1   |
| 343305 | 26.5  | 26.9  | 23.7  | 33.3  |
| 343262 | 36.3  | 37.4  | 32.1  | 32.8  |
| 343246 | 9.6   | 9.8   | 10.3  | 8.9   |
| 259676 | 26.7  | 34.4  | 26    | 37    |
| 256355 | 84.9  | 90.8  | 73.2  | 117.7 |
| 346047 | 30.1  | 26.9  | 34.4  | 29.7  |
| 459662 | 10.4  | 11.6  | 12.1  | 11.3  |
| 459550 | 15.3  | 12.7  | 14.2  | 16.6  |
| 459527 | 27.3  | 35.6  | 34.8  | 37.7  |
| 256425 | 22.6  | 23.4  | 22.8  | 31.4  |
| 351682 | 68.1  | 86.2  | 66.9  | 114.4 |
| 338592 | 47.6  | 48.3  | 54    | 54.4  |
| 341460 | 43.8  | 32    | 37.5  | 37.2  |
| 342379 | 10.4  | 14.3  | 13.2  | 16.7  |
| 256396 | 17.3  | 16.5  | 14.8  | 20.2  |
| 371212 | 8.5   | 9.8   | 11.2  | 9.4   |
| 371082 | 22.7  | 23.1  | 20.9  | 25.6  |
| 343874 | 18.6  | 14.3  | 14.1  | 12.6  |
| 369992 | 6.9   | 6.8   | 8.5   | 10.6  |
| 383733 | 122.9 | 119.4 | 115   | 122.1 |
| 434244 | 13.3  | 11.6  | 11    | 14    |
| 267192 | 5     | 3     | 1.9   | 5.7   |
| 370068 | 107.8 | 107.9 | 88.9  | 126.9 |
| 369750 | 10.5  | 6.4   | 5.4   | 9.5   |
| 268726 | 1.5   |       | 1.9   |       |
| 383592 | 6     | 5     | 6.5   | 6.7   |
| 474357 | 2.7   | 8.1   | 6.4   | 5.4   |
| 344512 | 18.1  | 11.4  | 14.6  | 11.2  |
| 266287 | 65.9  | 68.2  | 67.2  | 71.5  |
| 266126 | 55.3  | 62.4  | 58.6  | 69.8  |
| 401823 | 21.5  | 27.1  | 21.8  | 43.4  |
| 459796 | 14    | 11.2  | 11    | 13.4  |
| 396480 | 49.7  | 58.6  | 57.2  | 57    |
| 314464 | 34.4  | 32.6  | 25.3  | 33.8  |
| 459432 | 6     | 3.3   | 5.3   | 2.8   |
| 266062 | 52.6  | 54.1  | 69.8  | 66.8  |
| 370052 | 336.7 | 356   | 328.3 | 440.2 |
| 371128 | 17.7  | 17.5  | 28.7  | 15.6  |
| 423739 | 12.2  | 9.9   | 8.5   | 8.4   |

|        |       |       |       |       |
|--------|-------|-------|-------|-------|
| 424532 | 36.2  | 36.9  | 39.5  | 46.8  |
| 448849 | 39.5  | 39.3  | 41.1  | 46    |
| 326172 | 12.8  | 14.1  | 16.2  | 15.3  |
| 383684 | 35.8  | 32.7  | 29.2  | 29.9  |
| 299906 | 1.2   | 2.2   | 1.6   |       |
| 266211 | 70.8  | 74.1  | 74.3  | 83    |
| 298738 | 6.7   | 5.5   | 2.8   | 2.5   |
| 448773 | 7.6   | 5.9   | 6.5   | 13.6  |
| 378290 | 138.3 | 131   | 108.1 | 118.6 |
| 337989 | 53.4  | 54.6  | 53.3  | 60.6  |
| 256339 | 19.5  | 15.3  | 20.3  | 18.3  |
| 292759 | 86.3  | 72.8  | 87.1  | 74    |
| 349161 | 53.6  | 93    | 88.4  | 91.9  |
| 258618 | 14.3  | 12.3  | 14.4  | 12.8  |
| 394071 | 72.6  | 59.1  | 69.2  | 79    |
| 349317 | 112.7 | 90.2  | 82.9  | 94.7  |
| 335087 | 155.2 | 227.2 | 216.6 | 243.7 |
| 394187 | 16    | 15.2  | 13.7  | 17.9  |
| 321867 | 6     | 5.1   | 6.8   | 6.5   |
| 383634 | 107   | 113.1 | 116.4 | 123.8 |
| 268827 | 3     | 2.9   | 5.4   | 8.5   |
| 322867 | 1.5   | 4.8   | 1.4   | 6.2   |
| 266025 | 20.2  | 22.4  | 22.5  | 25.5  |
| 379429 | 2     | 3.2   | 6.1   | 3     |
| 378281 | 51.2  | 54.7  | 47.2  | 53.2  |
| 281870 | 58.4  | 62.4  | 80.9  | 77.9  |
| 267102 | 6     | 3.2   | 1.9   | 2.1   |
| 264807 | 9.5   | 6.8   | 6     | 7.1   |
| 337805 | 66.1  | 57.8  | 60.3  | 69.1  |
| 335084 | 244.8 | 367.4 | 319.7 | 349.3 |
| 423614 | 39.9  | 36.6  | 41    | 39    |
| 467464 | 11.8  | 10    | 9     | 10.5  |
| 404112 | 13.6  | 11.4  | 13.6  | 13.8  |
| 298618 | 1.4   | 2.5   | 2.4   | 1.6   |
| 288779 | 22.7  | 22.9  | 19.1  | 17    |
| 458042 | 25    | 25.2  | 12    | 22.1  |
| 395236 | 85.3  | 61.5  | 50.7  | 51.7  |
| 426108 | 92.5  | 64.4  | 50.5  | 233.1 |
| 353410 | 1.6   |       |       |       |
| 314348 | 6.8   | 10    | 7.3   | 7.2   |
| 404503 | 2.4   | 2.5   | 5.8   | 5.4   |
| 326333 | 3     | 2.4   | 1.4   | 2     |
| 266148 | 27.9  | 29    | 26.7  | 33    |
| 264911 | 7.9   | 7.7   | 5.2   | 7.8   |
| 344330 | 5.5   | 7.7   | 7.7   | 5.5   |
| 344317 | 10.3  | 11.9  | 11.4  | 13.2  |
| 256297 | 10.6  | 11.6  | 7.8   | 18.4  |
| 423694 | 53.4  | 51.6  | 50.4  | 51.3  |
| 326733 | 3.4   | 2.6   | 1.8   | 4.6   |
| 336222 | 8.5   | 15.9  | 12.9  | 15.5  |
| 314466 | 96.8  | 89.1  | 69.3  | 83.9  |
| 351712 | 3.1   | 8.9   | 5.4   | 10.1  |



|        |      |       |       |       |
|--------|------|-------|-------|-------|
| 266229 | 55.5 | 60.9  | 57.8  | 59.2  |
| 384731 | 2.9  | 3.3   | 3     | 9     |
| 383925 | 5.3  | 9.5   | 8.9   | 8.6   |
| 386754 | 3.2  | 10.8  | 8.5   | 8.4   |
| 386892 | 9.9  | 13.7  | 16.4  | 20.8  |
| 386553 | 17.1 | 31.3  | 37.2  | 52.6  |
| 386496 | 20.4 | 28.3  | 27    | 40.8  |
| 386473 | 20.5 | 49.7  | 40.8  | 60.3  |
| 386895 | 5.9  | 10.1  | 8.9   | 18.1  |
| 452873 | 11.1 | 9.7   | 13.3  | 18    |
| 452873 | 11.1 | 9.7   | 13.3  | 18    |
| 452873 | 11.1 | 9.7   | 13.3  | 18    |
| 380987 | 51   | 148.3 | 152.8 | 257.9 |
| 395820 | 8.2  | 6.8   | 6.5   | 11.7  |
| 393864 | 2.9  | 12.1  | 11.8  | 18.9  |
| 394164 | 76.6 | 96.5  | 89.1  | 285.8 |
| 393644 |      | 1.3   | 1.8   | 5.5   |
| 394729 | 2.7  | 11.4  | 10.4  | 16.6  |
| 397916 | 40.2 | 113.2 | 113.4 | 180.9 |
| 389556 |      | 5.8   | 2.6   | 5.9   |
| 389504 | 2    | 2.7   | 5     | 8.5   |
| 389442 | 2.5  | 12.8  | 9.5   | 14.5  |
| 389379 | 3    | 3.1   | 6.7   | 10.4  |
| 389144 | 2.5  | 3.3   | 3.4   | 6.9   |
| 391589 | 2.9  | 9.9   | 12.2  | 14    |
| 391627 |      | 2.5   | 2.3   | 6.2   |
| 390538 | 2.1  | 2.6   | 5.3   | 3.3   |
| 390444 | 6.5  | 16.3  | 19    | 20.4  |
| 390443 | 6.1  | 13    | 14.2  | 14.9  |
| 390397 | 32.3 | 84.5  | 91.6  | 132.6 |
| 390396 | 25.4 | 63.9  | 56.9  | 82.7  |
| 390340 | 27.6 | 79.8  | 87.9  | 128.5 |
| 390337 | 21.7 | 63.6  | 67.1  | 87.2  |
| 390268 |      | 6.8   | 7.9   | 7.1   |
| 390267 |      | 7     | 9     | 8.1   |
| 456658 | 14   | 11    | 11.3  | 13.1  |
| 456812 | 18.1 | 11.9  | 20.7  | 18.2  |
| 456309 | 17.6 | 13    | 21.5  | 18.2  |
| 456188 | 2.5  | 3.1   | 5.8   | 6.8   |
| 456192 | 2.2  | 9.3   | 11    | 15.8  |
| 456540 | 27.3 | 39.1  | 18    | 26.5  |
| 456314 | 5.5  | 14.4  | 12.6  | 18.4  |
| 456430 | 15.8 | 18.5  | 16.4  | 27.3  |
| 355163 | 7.3  | 30.8  | 31.3  | 47.2  |
| 355023 | 3.1  | 2.4   | 2.9   | 6.8   |
| 355163 | 7.3  | 30.8  | 31.3  | 47.2  |
| 354710 | 10.9 | 12.1  | 13    | 17.3  |
| 354513 | 1.6  | 2.1   | 3     | 5.2   |
| 355167 | 2    | 14.2  | 14.2  | 22    |
| 355778 | 3.2  | 4.7   | 7     | 8.1   |
| 355301 | 1.3  | 1.5   | 1.7   | 4.8   |
| 355300 | 10.3 | 25    | 27.6  | 38.4  |

|        |      |       |       |       |
|--------|------|-------|-------|-------|
| 354106 | 7    | 10.5  | 10.9  | 20    |
| 353981 | 14.4 | 35.6  | 30.7  | 54.3  |
| 353957 | 67   | 174.1 | 170.5 | 298.5 |
| 353863 | 31.6 | 112.8 | 113.8 | 185.7 |
| 358712 | 11.2 | 14.4  | 15    | 17.5  |
| 358231 | 19.9 | 45    | 30.5  | 53.9  |
| 358103 | 7.2  | 19.4  | 18.4  | 29.9  |
| 358093 | 15.8 | 36.9  | 42.9  | 64.2  |
| 457002 | 18.1 | 13.6  | 12    | 16.8  |
| 453879 | 20.2 | 17.2  | 25.8  | 29.2  |
| 375823 | 12.5 | 17.1  | 20.8  | 18.8  |
| 375823 | 12.5 | 17.1  | 20.8  | 18.8  |
| 453867 | 21.3 | 19.3  | 27.6  | 31.6  |
| 370682 | 10.6 | 20.3  | 17.9  | 20.9  |
| 367548 | 9    | 32.1  | 27.2  | 47.3  |
| 367515 |      | 3.1   | 3.3   | 6.5   |
| 456066 | 42.8 | 29.9  | 28.8  | 28.3  |
| 367125 | 1.5  | 2.6   | 5.5   | 7.1   |
| 367114 |      | 1.8   | 2     |       |
| 367051 |      | 1.4   | 1.8   | 1.5   |
| 449019 | 2    | 1.4   | 2     | 2.1   |
| 430051 | 8.5  | 9.7   | 11.1  | 15.6  |
| 429973 | 6.8  | 23.3  | 19.4  | 26    |
| 429888 | 9.5  | 26.2  | 24.8  | 37.3  |
| 429882 | 15.2 | 38.6  | 42.7  | 55.9  |
| 429858 | 10.9 | 26.9  | 26.1  | 41.7  |
| 429768 | 22.3 | 25.4  | 25    | 30.8  |
| 429749 | 7.8  | 8.6   | 10.7  | 10.3  |
| 423857 | 2    | 8.1   | 8.6   | 15.3  |
| 423853 | 5.2  | 14.2  | 11.9  | 20.2  |
| 424900 | 1.5  | 2.8   | 5.4   | 6     |
| 426727 | 34.1 | 81.9  | 107.2 | 129.4 |
| 427182 | 23.6 | 34.3  | 36.5  | 43.7  |
| 427033 | 34   | 45.8  | 58.4  | 54.5  |
| 426968 | 43.3 | 86.4  | 92.5  | 116   |
| 426930 | 20.9 | 37.9  | 54.1  | 58.1  |
| 426881 | 72.9 | 200.8 | 218.2 | 244.6 |
| 426820 | 43.8 | 99.5  | 120.3 | 139.1 |
| 426780 | 58.4 | 178.4 | 194.8 | 240.1 |
| 436135 |      | 6.1   | 8     | 8.8   |
| 407812 | 7.5  | 15.9  | 18.8  | 23.6  |
| 407209 | 25.3 | 27    | 25.9  | 36.6  |
| 407810 | 7.3  | 10.3  | 14.2  | 17.3  |
| 401316 | 6    | 6.7   | 5.5   | 7.3   |
| 401172 | 5.4  | 9.6   | 6.6   | 15.9  |
| 399541 | 24.1 | 64.5  | 47    | 84.7  |
| 399459 | 89.8 | 150.5 | 167.4 | 210.8 |
| 399437 | 28.8 | 47.9  | 51.6  | 78.3  |
| 399543 | 5.5  | 12.5  | 11    | 21.6  |
| 448727 | 1.6  | 2.7   | 7.3   | 6.1   |
| 448727 | 1.6  | 2.7   | 7.3   | 6.1   |
| 401316 | 6    | 6.7   | 5.5   | 7.3   |

|        |      |       |       |       |
|--------|------|-------|-------|-------|
| 448262 | 5.8  | 9.1   | 6.6   | 10.1  |
| 402460 | 10.8 | 11.4  | 10.5  | 12.9  |
| 402443 | 6.2  | 21    | 19.1  | 26.1  |
| 402321 | 12.6 | 9.1   | 9.5   | 11.1  |
| 402309 | 9.2  | 13.2  | 18.1  | 16.1  |
| 416369 |      | 1.9   | 2.3   | 3.3   |
| 416368 | 7.5  | 23    | 20.7  | 31.3  |
| 416234 | 6.5  | 15.1  | 17.5  | 24.1  |
| 417290 |      | 3.3   | 2.7   | 6.8   |
| 417161 | 2.5  | 6.7   | 12.3  | 8.2   |
| 417161 | 2.5  | 6.7   | 12.3  | 8.2   |
| 417152 | 6.2  | 8.9   | 10.6  | 13.3  |
| 416982 |      |       | 2.6   | 2.7   |
| 416981 | 12.1 | 24.3  | 27.7  | 37    |
| 416818 |      | 2.1   | 1.7   | 2.3   |
| 416816 | 10.7 | 23.5  | 26    | 37.5  |
| 416640 |      | 3.2   | 4.8   | 7     |
| 416636 | 3.3  | 14.7  | 16.4  | 27.9  |
| 416505 | 7.1  | 19.5  | 18.8  | 29.9  |
| 419663 | 29.6 | 73.5  | 70.7  | 121.7 |
| 419658 | 32.9 | 91.8  | 84.3  | 148.4 |
| 419816 | 34.2 | 95.4  | 92.1  | 157.3 |
| 419822 | 26.4 | 74.1  | 68.9  | 121.8 |
| 420117 | 5.1  | 20.4  | 20.5  | 31.6  |
| 420010 | 13   | 32    | 30    | 47    |
| 420003 | 19.4 | 57.9  | 47.4  | 88    |
| 409965 | 2.2  | 2.5   | 5.7   | 7.7   |
| 414884 | 5.6  | 12.6  | 12.1  | 15.7  |
| 414869 | 1.8  | 9.7   | 8.8   | 11.9  |
| 414750 | 2    | 11.3  | 12.5  | 21.5  |
| 414289 | 1.5  | 2.9   | 6     | 7.6   |
| 415174 | 1.8  | 8.6   | 8.1   | 14.7  |
| 415146 | 13.1 | 18.9  | 17    | 30.5  |
| 415005 | 2.4  | 7.4   | 7.6   | 11.2  |
| 474509 | 16.6 | 23.8  | 29    | 36.8  |
| 288378 | 17.8 | 41.4  | 31.9  | 74.2  |
| 288097 | 2.4  | 8.1   | 8.7   | 10.4  |
| 474484 | 23.5 | 63.7  | 70.3  | 94.8  |
| 290918 | 1.9  |       | 1.9   | 1.4   |
| 290974 | 2.5  |       | 1.4   |       |
| 291016 | 2.1  |       | 2.3   | 1.7   |
| 289747 | 19.5 | 41.4  | 28.8  | 77.9  |
| 290161 | 13.5 | 35.8  | 33.8  | 59.1  |
| 336161 | 13.6 | 32.1  | 40.8  | 54.8  |
| 285758 | 1.5  | 5.8   | 8.2   | 10.4  |
| 285800 | 66.5 | 104.3 | 111.1 | 150.1 |
| 285888 | 11.3 | 28.5  | 26.4  | 44.3  |
| 286907 | 18.6 | 52.3  | 47.5  | 86.5  |
| 285670 | 7.2  | 15.7  | 9.9   | 19.8  |
| 313769 | 7.7  | 19.1  | 17.3  | 29.7  |
| 313766 | 20.4 | 37.6  | 31.5  | 53.8  |
| 313675 | 61   | 151.8 | 126.6 | 186.8 |

|        |      |       |       |       |
|--------|------|-------|-------|-------|
| 468579 |      | 7.3   | 8.9   | 11.8  |
| 470105 | 5.7  | 12.1  | 9     | 20.6  |
| 469959 | 9.5  | 22    | 19.1  | 42.2  |
| 469831 | 2.6  | 5     | 2.3   | 8.5   |
| 310030 | 75.6 | 127.2 | 111.1 | 163.6 |
| 470233 | 15.6 | 42.4  | 41.5  | 74.4  |
| 470116 | 5.2  | 12    | 12.4  | 20.7  |
| 471317 | 23.6 | 24.4  | 21.2  | 26.8  |
| 317475 | 5.3  | 13.9  | 12.1  | 17.7  |
| 317346 | 3.2  | 15.1  | 19.5  | 25.2  |
| 317330 | 6.2  | 17.5  | 26.6  | 26.9  |
| 292506 | 48.1 | 94.1  | 104.7 | 140.3 |
| 292365 | 32.7 | 127.7 | 163.1 | 205   |
| 317497 | 6.8  | 14.5  | 13.6  | 23.9  |
| 315318 | 13.6 | 39.2  | 43.8  | 66.7  |
| 315222 | 15.3 | 42.5  | 37.4  | 54.6  |
| 315534 | 7    | 17.4  | 15.7  | 30.7  |
| 315466 | 16.6 | 41.7  | 43.6  | 69.5  |
| 315424 | 2.8  | 13.5  | 15    | 18    |
| 468403 | 7.3  | 10.4  | 9.3   | 17.1  |
| 315572 | 17   | 37.1  | 35    | 56.9  |
| 315579 | 9.1  | 15.4  | 15.7  | 27.1  |
| 315709 | 11.2 | 22.7  | 26.4  | 39.2  |
| 315671 | 13.8 | 29.8  | 30.7  | 50.6  |
| 468223 | 6.4  | 6.6   | 7.2   | 7.7   |
| 315797 | 7.3  | 7.2   | 3     | 9.2   |
| 253928 | 14.1 | 41.6  | 37.4  | 61.6  |
| 345107 | 36.1 | 98.6  | 72.6  | 164.6 |
| 254010 | 7.3  | 24.7  | 19.4  | 35.2  |
| 264960 | 6.9  | 8.5   | 9.8   | 11.1  |
| 265559 | 9.1  | 14.4  | 14.4  | 24.6  |
| 253947 | 19.4 | 59.8  | 59.4  | 102.3 |
| 344955 | 28.5 | 68.1  | 48.4  | 113.8 |
| 265394 | 5.3  | 2.9   | 5.4   | 3.3   |
| 266037 | 30.5 | 80.9  | 87.6  | 117.5 |
| 267512 | 17.6 | 30.4  | 51.1  | 38.6  |
| 267364 | 16.5 | 35.1  | 59.7  | 51.4  |
| 267443 | 30.4 | 63.7  | 107.7 | 85.1  |
| 266305 | 11.1 | 36.8  | 33.9  | 49.8  |
| 252585 | 5.3  | 6.8   | 7.9   | 11    |
| 266221 | 10.1 | 19.7  | 20.8  | 31.9  |
| 266279 | 9.6  | 26.8  | 28.9  | 38.3  |
| 255904 | 25.2 | 49.2  | 81.9  | 61.4  |
| 458605 | 6.4  | 5.8   | 5.3   | 2.6   |
| 254112 | 4.8  | 10.1  | 9     | 15.2  |
| 254092 | 16.9 | 46.7  | 36.8  | 64    |
| 475243 |      | 7.4   | 7.9   | 15.1  |
| 254029 | 19.8 | 55.3  | 47.2  | 87.4  |
| 475027 | 18   | 27.1  | 29.8  | 36.6  |
| 338021 | 25.5 | 45.3  | 49.5  | 59.3  |
| 268731 | 20.8 | 50.8  | 51.4  | 86.8  |
| 475097 | 36.2 | 88.1  | 98.5  | 150.1 |

|        |       |       |       |       |
|--------|-------|-------|-------|-------|
| 475100 | 20    | 43.9  | 37.6  | 61.4  |
| 268740 | 21.8  | 61.3  | 58    | 102.9 |
| 268956 | 74    | 83.7  | 101.2 | 105.1 |
| 269052 | 46.3  | 57.3  | 59.5  | 64.9  |
| 268651 | 32.2  | 81.8  | 97.9  | 160.2 |
| 268645 | 6.5   | 21.3  | 21.4  | 31.5  |
| 268639 | 19.8  | 54.5  | 55.1  | 90.8  |
| 460951 | 14.4  | 26.6  | 25.5  | 32.3  |
| 268627 | 22.3  | 83    | 70.1  | 127.1 |
| 270078 | 10.4  | 22.9  | 23.1  | 27.7  |
| 269998 | 22.4  | 56.1  | 55.9  | 83    |
| 269990 | 13.1  | 30    | 34.3  | 50.1  |
| 269925 | 17.8  | 55.7  | 52.8  | 75.7  |
| 269919 | 23.7  | 62.4  | 70.2  | 98.8  |
| 269843 | 18.8  | 58.2  | 55.4  | 82.7  |
| 269831 | 15.9  | 62.4  | 68.3  | 93.2  |
| 269436 | 21.9  | 47.5  | 35.2  | 61.2  |
| 269514 | 14.7  | 38.4  | 33.2  | 46.1  |
| 269233 | 34.1  | 65    | 62.1  | 85.9  |
| 269464 | 2     | 2.9   | 6     | 5.7   |
| 269335 | 32.7  | 53.4  | 64.8  | 87.8  |
| 269118 | 62.2  | 85    | 93.8  | 121.5 |
| 269752 | 31.2  | 36    | 39.6  | 41.3  |
| 313667 | 27.7  | 81.3  | 75.4  | 112.9 |
| 456664 | 15.2  | 10.1  | 16.5  | 13.3  |
| 269588 | 10.2  | 22.2  | 16    | 23.9  |
| 353841 | 14.9  | 30    | 32.3  | 45    |
| 376880 | 27.7  | 65.5  | 69.3  | 107.3 |
| 255909 | 11.9  | 21.4  | 27    | 23.8  |
| 389017 |       | 2.2   | 1.9   | 5.2   |
| 376020 | 128.5 | 62    | 111.2 | 66.1  |
| 288953 | 11    | 12.9  | 10.3  | 14.9  |
| 336157 | 67.6  | 170.5 | 175.3 | 269   |
| 397843 | 23.9  | 42.5  | 42    | 57.7  |
| 364015 |       | 1.3   |       | 1.4   |
| 377247 | 11.6  | 24.8  | 23.6  | 34.3  |
| 284669 | 4.9   | 3.4   | 6.6   | 3     |
| 427112 | 19.4  | 27.6  | 30.3  | 31.3  |
| 254169 | 2.7   | 2.7   | 3.1   | 8.2   |
| 290000 | 31.6  | 111.7 | 126   | 210.4 |
| 267482 | 65.2  | 126.1 | 201.3 | 169.7 |
| 289597 | 11.6  | 35.8  | 22.2  | 70.7  |
| 289079 | 9.5   | 14.9  | 14.8  | 16.2  |
| 313962 | 23    | 36.8  | 32.5  | 47    |
| 389195 | 3.1   | 6     | 2.3   | 5.8   |
| 367045 |       |       | 1.5   | 2     |
| 456195 | 2.5   | 7.6   | 6.7   | 11.9  |
| 315276 | 62.8  | 134.2 | 132.6 | 226.2 |
| 375907 | 17.7  | 27.3  | 32.2  | 39.7  |
| 449026 | 1.6   | 2.7   | 5.8   | 7.3   |
| 313628 | 14.9  | 20.9  | 26.9  | 34.5  |
| 469952 |       | 1.7   | 2.3   | 5.5   |

|        |       |       |       |       |
|--------|-------|-------|-------|-------|
|        |       |       |       |       |
| 449546 | 80.5  | 66.1  | 64.3  | 99.2  |
| 394136 | 61.5  | 81    | 85.5  | 109.4 |
| 426691 | 28.6  | 29    | 35.6  | 43.7  |
| 380991 | 29.2  | 64.9  | 63.8  | 96.8  |
| 308961 | 1.6   | 3.5   | 6.7   | 6.8   |
| 427071 | 14.4  | 29.3  | 28.9  | 44.1  |
| 256648 | 5.4   | 14.7  | 13.2  | 18.8  |
| 256679 | 5.7   | 13.1  | 13.3  | 18.7  |
| 427646 | 24    | 26.5  | 22.1  | 28.9  |
| 266141 | 12.9  | 13.8  | 9.5   | 11.7  |
| 371040 | 102.9 | 125.4 | 125.8 | 153.5 |
| 454357 | 26.7  | 57.6  | 53.7  | 97.8  |
| 415633 | 1.8   | 2.1   | 2.8   | 6     |
| 256648 | 5.4   | 14.7  | 13.2  | 18.8  |
| 380849 | 2.1   | 6.9   | 8.5   | 8.6   |
| 266129 | 12.8  | 31.7  | 25.2  | 49.1  |
| 377144 | 13.8  | 23.6  | 28.5  | 41.2  |
| 253803 | 27.2  | 73.9  | 81.1  | 126.4 |
| 269154 | 62.3  | 70.1  | 76.2  | 74.7  |
| 415055 | 8.4   | 10.8  | 11    | 15.6  |
| 390493 | 1.7   | 5.7   | 5.2   | 6.2   |
| 268087 | 8.4   | 12.3  | 8     | 11.7  |
| 317711 | 34    | 33.3  | 29.3  | 41    |
| 377068 | 15.1  | 25.5  | 27.2  | 41.7  |
| 293655 | 12.2  | 20.6  | 20.4  | 27.3  |
| 426346 | 27.4  | 78.8  | 64.8  | 117.1 |
| 450566 | 32.6  | 44.8  | 47.4  | 61.9  |
| 426638 | 91.4  | 250.5 | 173.7 | 221.8 |
| 256707 | 5.1   | 8.3   | 7.1   | 11.3  |
| 456811 | 34.9  | 24.2  | 21.2  | 23.9  |
| 358296 |       | 2.3   |       | 1.3   |
| 287008 | 13.3  | 15.5  | 14.6  | 20.8  |
| 313325 | 26.7  | 42.1  | 41    | 62.9  |
| 416506 |       | 2.2   |       | 5.8   |
| 291086 | 19.6  | 15.9  | 18.7  | 14.7  |
| 451219 | 27.3  | 34    | 28    | 52    |
| 417361 |       | 1.9   | 2     | 2.5   |
| 288912 | 4.3   | 14.7  | 13    | 19.3  |
| 458601 | 7.8   | 6.3   | 8.5   | 10.1  |
| 370696 | 1.7   | 9.5   | 7.9   | 12.4  |
| 398422 | 18.3  | 23.6  | 32.9  | 26.3  |
| 455508 | 17.7  | 19.2  | 26.9  | 26.8  |
| 376976 | 16.5  | 39.8  | 38.9  | 51.4  |
| 266215 | 40.9  | 74.5  | 75    | 118.5 |
| 288246 | 23.7  | 62.3  | 60.3  | 128   |
| 256707 | 5.1   | 8.3   | 7.1   | 11.3  |
| 441770 | 2.1   | 3.1   | 2.8   | 5.8   |
| 456062 | 15.7  | 7.6   | 8.2   | 7.7   |
| 448405 | 12.3  | 17.2  | 21.1  | 25.3  |
| 424449 | 3.2   | 5.8   | 7.3   | 7.5   |
| 416994 | 6.1   | 3.4   | 8.1   | 6     |

|        |       |       |       |       |
|--------|-------|-------|-------|-------|
| 290875 | 6.1   | 5.4   | 2.2   | 3     |
| 359370 |       |       |       | 2.7   |
| 398596 | 86.6  | 166.5 | 113.4 | 165   |
| 384809 |       | 1.6   | 1.9   | 1.7   |
| 288578 | 27.4  | 41.3  | 58.4  | 56.6  |
| 358386 | 5.1   | 5.4   | 16.7  | 7.9   |
| 268833 | 12    | 14.5  | 15.3  | 27.2  |
| 268817 | 18.5  | 23.5  | 27.9  | 40.2  |
| 289576 | 48.2  | 142.1 | 98.3  | 280.1 |
| 268722 | 6.2   | 7.4   | 9.4   | 11.8  |
| 376766 | 122.4 | 269.7 | 295.9 | 435.1 |
| 269375 | 2.9   | 2     | 2.8   | 7.5   |
| 268924 | 7.4   | 13.1  | 14.1  | 16.3  |
| 389729 |       |       |       | 2.4   |
| 393856 | 107   | 137   | 168   | 172.7 |
| 310723 | 17.8  | 31.3  | 20.9  | 33.2  |
| 448762 | 1.4   | 2.6   | 5.3   | 5.1   |
| 269203 | 18.8  | 29    | 24.9  | 34.9  |
| 265975 | 26.8  | 63.5  | 65.5  | 90.6  |
| 269019 | 56.3  | 69.2  | 75.2  | 90.2  |
| 268921 | 46.7  | 52.2  | 64    | 69.6  |
| 268831 | 31.8  | 49.1  | 59.5  | 62.5  |
| 268537 | 10    | 15.6  | 22    | 33    |
| 289111 | 16.8  | 15.4  | 16.1  | 9.6   |
| 450386 | 28    | 44    | 42.7  | 147   |
| 397961 | 17.6  | 18.6  | 33.7  | 30.4  |
| 292482 | 35.1  | 75.2  | 73.3  | 108.7 |
| 267802 | 2.9   | 9.2   | 5.6   | 11.4  |
| 347214 | 1.7   | 1.9   | 2.4   | 3.1   |
| 427088 | 21.5  | 17.7  | 17.9  | 20.8  |
| 415302 | 1.6   | 1.4   | 2.8   | 6     |
| 291589 | 8     | 16.2  | 20.8  | 30.3  |
| 414979 |       | 5.3   | 2.4   | 7.2   |
| 289729 | 55.1  | 177.6 | 89.6  | 326.5 |
| 451391 | 47.9  | 47.2  | 82.7  | 88.8  |
| 439999 | 1.5   | 2.2   | 2.2   | 5.3   |
| 436340 | 6.9   | 6.3   | 6.2   | 7.8   |
| 265857 | 27.7  | 89.9  | 98.4  | 146   |
| 288990 | 26.7  | 15.8  | 17.5  | 26.6  |
| 308957 | 25.4  | 59.9  | 71.8  | 68    |
| 271561 | 2.9   | 8     | 6.5   | 7.2   |
| 288680 | 10.8  | 23.3  | 33.9  | 34.4  |
| 383894 | 3.2   | 2.4   | 5.7   | 2.9   |
| 399558 | 13.3  | 17.6  | 15.8  | 20.8  |
| 309922 | 51.8  | 62.3  | 64.2  | 74.9  |
| 316218 |       | 2.8   | 2.6   | 7.1   |
| 312941 | 30.3  | 60.2  | 76.7  | 72.1  |
| 416239 |       | 1.8   | 1.9   | 2.1   |
| 419691 |       | 1.7   | 3.3   | 5.3   |
| 255934 | 6.9   | 9.2   | 15.5  | 13.9  |
| 313851 | 1.8   | 6.1   | 7.5   | 10.2  |
| 420119 |       | 3.1   | 2.3   | 3.4   |

|        |      |       |       |       |
|--------|------|-------|-------|-------|
| 370793 | 23.6 | 29.7  | 27.5  | 54.9  |
| 416987 | 1.5  | 1.9   |       | 2.5   |
| 415457 |      | 3.2   | 5.4   | 8.3   |
| 340021 | 43   | 51.6  | 65.9  | 62.6  |
| 398509 | 40.7 | 61.4  | 78.3  | 96.5  |
| 254418 | 6.6  | 6.3   | 7.9   | 6.2   |
| 315285 | 12.7 | 24.1  | 21.1  | 29.7  |
| 365088 | 2.6  | 2.7   | 3.2   | 6.5   |
| 395747 |      | 1.8   |       | 3.1   |
| 268870 | 40.3 | 59.7  | 57.2  | 63.4  |
| 424895 | 3.4  | 6.7   | 2.5   | 5.6   |
| 268616 | 6.1  | 7.3   | 10.1  | 8.4   |
| 443804 | 1.3  | 1.8   |       | 2.8   |
| 397638 | 5.9  | 10.7  | 17.3  | 10.7  |
| 416288 |      | 1.4   |       | 1.4   |
| 255871 | 7.8  | 11.4  | 16.9  | 12.7  |
| 267802 | 2.9  | 9.2   | 5.6   | 11.4  |
| 347088 | 3.2  | 3     | 2.6   | 3.3   |
| 379695 | 7.6  | 8.5   | 8.5   | 11    |
| 427356 | 37.2 | 31.1  | 29    | 32.1  |
|        |      |       |       |       |
| 390126 | 2    | 1.6   | 2.1   | 2.8   |
| 288352 | 6.2  | 16.5  | 10.4  | 25.7  |
| 433285 | 5.9  | 17.4  | 13.7  | 20.8  |
| 265738 | 31.6 | 95.1  | 110   | 160.1 |
| 419496 |      | 5.5   | 3.3   | 7.8   |
| 312392 | 19.2 | 16.7  | 23.5  | 25.9  |
| 265476 | 85.9 | 55.8  | 65.6  | 67    |
| 425869 | 42.8 | 48.3  | 62    | 43.6  |
| 430141 | 10.8 | 10.5  | 9.1   | 11.8  |
| 289958 | 6.2  | 13.4  | 16.2  | 19.1  |
| 399676 | 33.1 | 24.8  | 27.2  | 31.8  |
| 426702 | 23.5 | 34.2  | 40.9  | 61.8  |
| 357935 | 1.5  | 3.3   | 3.1   | 5.8   |
| 314885 | 5.8  | 8.6   | 12.1  | 17.8  |
| 414459 |      |       | 1.7   |       |
| 424277 | 1.6  | 8.3   | 6.6   | 11.1  |
| 270065 | 1.6  | 6.8   | 8.6   | 12.6  |
| 454263 | 54.4 | 152.3 | 144.7 | 246.4 |
| 427155 | 17.3 | 20.5  | 21.2  | 23.5  |
| 407693 | 4.9  | 6.2   | 2.5   | 6.8   |
| 292346 | 5.6  | 17.7  | 20.3  | 19.1  |
| 288229 | 2.8  | 15.3  | 11.1  | 26.2  |
| 269479 | 3.1  | 6.2   | 6.5   | 8.7   |
| 269020 | 5.5  | 8.7   | 9.9   | 12.6  |
| 401184 | 6.6  | 5.9   | 6.1   | 6.5   |
| 416588 |      | 2.7   | 1.5   | 1.7   |
| 336381 | 70.3 | 92.6  | 82.7  | 102.5 |
| 417870 | 1.5  | 2.2   | 2.1   | 5.7   |
| 452780 | 2.7  | 2.7   | 3.1   | 5.3   |
| 452780 | 2.7  | 2.7   | 3.1   | 5.3   |
| 452780 | 2.7  | 2.7   | 3.1   | 5.3   |



|        |       |       |       |       |
|--------|-------|-------|-------|-------|
| 436046 |       |       | 1.9   |       |
| 419855 |       | 2     | 2.1   | 2.9   |
| 419696 |       | 2.9   |       | 5.5   |
| 337984 | 11.2  | 7.5   | 11    | 10.8  |
| 380845 | 6.5   | 11.8  | 15.1  | 14.9  |
| 361164 | 2.1   | 3.2   | 6.7   | 8.1   |
| 398536 | 53.7  | 151.3 | 159.7 | 255.9 |
| 398862 | 26.3  | 36.9  | 42.8  | 64.1  |
| 269390 | 2.2   | 5.9   | 5.5   | 6.7   |
| 312498 | 7.2   | 9.9   | 6.7   | 10.6  |
| 425913 | 15.3  | 20.3  | 34.3  | 28.4  |
| 397636 | 56.8  | 112   | 246.7 | 125.8 |
| 384774 | 1.9   |       |       | 1.7   |
| 416823 |       |       |       | 2.7   |
| 417391 |       |       |       | 1.8   |
| 316184 | 8.7   | 8.5   | 7.3   | 9     |
| 286896 | 9.7   | 8.6   | 10.7  | 16.8  |
| 287256 | 12.9  | 20.5  | 11.9  | 19.6  |
| 269548 | 5     | 5.6   | 8.8   | 10.5  |
| 265641 | 25.6  | 33.7  | 28.3  | 44.5  |
| 361184 |       | 1.6   | 1.6   | 5.5   |
| 451192 | 28.8  | 27.2  | 26.9  | 27.9  |
| 267674 | 15.5  | 18.4  | 19.8  | 25.6  |
| 380803 | 19.5  | 11.2  | 14.3  | 9.8   |
| 381251 | 13.4  | 11    | 10.9  | 9.5   |
| 381239 | 28    | 22    | 26    | 26.9  |
| 381152 | 11.4  | 12.5  | 14.9  | 11.2  |
| 395155 | 129.3 | 117.1 | 122.7 | 111.1 |
| 395122 | 6.6   | 3.4   | 7.2   | 10.3  |
| 378792 | 38.1  | 49.1  | 29.8  | 30.4  |
| 377375 | 98.6  | 84.8  | 87.9  | 85.2  |
| 377283 | 14.3  | 12.4  | 14.6  | 11.2  |
| 370657 | 123.6 | 100.3 | 116.3 | 104.7 |
| 455932 | 43.1  | 44.2  | 51.1  | 55.6  |
| 455961 | 6.1   | 19.4  | 11.1  | 10.8  |
| 429298 | 85.2  | 73.6  | 65    | 84.4  |
| 429318 | 16    | 16.3  | 13.3  | 20    |
| 429381 | 179.7 | 137.8 | 101.8 | 139.3 |
| 422239 | 58    | 57    | 66.9  | 64.3  |
| 435877 | 24.5  | 22.4  | 26.1  | 26.2  |
| 408576 | 42.3  | 55.3  | 67.2  | 55.5  |
| 406702 | 67.3  | 50.9  | 49    | 53.7  |
| 422207 | 105.3 | 97.7  | 116.4 | 103.7 |
| 446577 | 265.7 | 275.3 | 319.3 | 289.3 |
| 422218 | 60.9  | 50.7  | 58.6  | 52.5  |
| 446462 | 71.5  | 66.9  | 88    | 79.1  |
| 446455 | 104   | 98.5  | 126.2 | 115.2 |
| 287325 | 26.5  | 18.7  | 22.3  | 21.6  |
| 291078 | 11.2  | 10.8  | 6.8   | 6.4   |
| 320179 | 33.3  | 29.8  | 39.9  | 31.5  |
| 474886 | 52.8  | 36.6  | 37.2  | 45.5  |
| 474863 | 93.1  | 75.4  | 67.8  | 81.6  |

|        |       |       |       |       |
|--------|-------|-------|-------|-------|
| 474767 | 221.3 | 219.3 | 250.8 | 289.4 |
| 474761 | 105.9 | 125   | 124.5 | 143.5 |
| 287115 | 3     | 3.3   | 5.6   | 6.3   |
| 312046 | 112.3 | 105.5 | 109.2 | 101.1 |
| 470834 |       |       |       | 2.1   |
| 467284 | 1.5   | 2.7   | 3     | 5.5   |
| 318113 | 28.7  | 25.6  | 33.7  | 26.7  |
| 344442 | 57.9  | 47.9  | 43.8  | 40    |
| 458332 | 24    | 17.5  | 15    | 16.4  |
| 350942 | 29.7  | 22    | 28.5  | 24.4  |
| 475387 | 17    | 11.7  | 14.7  | 16.4  |
| 475385 | 139.5 | 153.2 | 170   | 153   |
| 475361 | 36.5  | 28.4  | 35.7  | 35.4  |
|        |       |       |       |       |
|        |       |       |       |       |
| 475540 | 19.1  | 17.7  | 19    | 18.7  |
| 462790 | 16.4  | 10.3  | 11.8  | 15.4  |
| 475536 | 11.9  | 7.3   | 6.4   | 8.6   |
| 337109 | 273.4 | 247.1 | 293   | 281.8 |
| 462632 | 18.7  | 13    | 13.6  | 19.7  |
| 462758 | 21.7  | 14.9  | 15.2  | 20.6  |
| 268767 | 2.4   | 3.3   | 2.2   | 3.1   |
| 460922 | 165.8 | 100.1 | 102   | 100.5 |
| 270455 | 63.6  | 47.8  | 50.2  | 48.2  |
| 270456 | 53.9  | 40.1  | 36.9  | 42.3  |
| 380724 | 98.1  | 70.6  | 95.1  | 75.4  |
| 380720 | 23.3  | 15.3  | 23.4  | 16.8  |
| 402015 | 16.6  | 14.8  | 16.2  | 14.9  |
| 448083 | 17.4  | 11.1  | 21.6  | 13.4  |
| 427938 | 36.4  | 27.9  | 20.9  | 29.2  |
| 435877 | 24.5  | 22.4  | 26.1  | 26.2  |
| 263197 | 19    | 19.4  | 25.4  | 19.2  |
| 428476 | 19.7  | 15.4  | 15.9  | 20    |
| 320079 | 17.2  | 15    | 13.2  | 11.1  |
| 427677 | 32.8  | 22.4  | 14.7  | 24.7  |
| 340212 | 54    | 43.4  | 45    | 46.1  |
| 348048 | 92    | 68.3  | 73.1  | 75.7  |
| 344440 | 30.1  | 24.1  | 26.9  | 24.8  |
| 403973 | 15    | 12.9  | 20.1  | 9.5   |
| 375098 | 21.9  | 18    | 12.9  | 17.6  |
| 248473 | 6.8   | 8     | 9     | 7.5   |
| 263224 | 112.7 | 87.5  | 112   | 97.5  |
| 430105 | 12.8  | 15.2  | 10    | 13.3  |
| 448260 | 7.9   | 5.7   | 10.9  | 8.7   |
| 469441 | 15.7  | 15.3  | 15.4  | 16.7  |
| 430098 | 16.7  | 26.9  | 33.4  | 9.7   |
| 282864 | 9.2   | 18.4  | 27.5  | 27.1  |
| 282875 | 224   | 168   | 184.3 | 143.6 |
| 400731 | 60.7  | 64.8  | 94.3  | 91.7  |
| 395123 | 49.3  | 48    | 47.3  | 44.3  |
| 453468 | 41.5  | 21.2  | 20    | 22.9  |
| 453468 | 41.5  | 21.2  | 20    | 22.9  |

|        |       |       |       |       |
|--------|-------|-------|-------|-------|
| 268680 |       | 1.5   | 1.8   | 1.4   |
| 287223 | 39    | 48.7  | 49.8  | 42.7  |
| 453326 | 40.4  | 35.8  | 44.4  | 40    |
| 342006 | 11.7  | 9.9   | 12.2  | 15.3  |
| 250142 | 15.5  | 13.8  | 13.4  | 17.6  |
| 270349 | 8.4   | 7.6   | 8.2   | 7.1   |
| 270015 | 2.7   | 2.4   | 1.5   | 5.9   |
| 453708 | 2.9   | 5.7   | 7.1   | 1.9   |
| 449207 | 13    | 13    | 13.6  | 12.9  |
| 249963 | 24.7  | 24.2  | 33.1  | 31.6  |
| 436629 | 82.6  | 54.1  | 80.6  | 47.3  |
| 449208 | 6.1   | 2.2   | 2.6   | 2.3   |
| 435553 | 11.4  | 12    | 11.1  | 12.1  |
| 400074 | 45.8  | 46.5  | 60.4  | 51    |
| 395067 | 21.6  | 23    | 22.2  | 23.5  |
| 270353 | 22    | 16.5  | 19.6  | 22.8  |
| 398330 | 35.4  | 40.6  | 56.3  | 47.6  |
| 430120 | 10.4  | 11.5  | 8.8   | 13.4  |
| 430021 | 18.4  | 15.3  | 23.8  | 15.3  |
| 341648 | 7.2   | 5.7   | 6.9   | 6.5   |
| 286465 | 38.5  | 30.4  | 45.3  | 34.1  |
| 458191 | 22.5  | 24.1  | 27.5  | 28    |
| 398496 | 86.7  | 65.6  | 81    | 73.3  |
| 400893 | 17    | 14.2  | 13.8  | 14    |
| 450860 | 34.4  | 48.8  | 37.2  | 24.1  |
| 374150 | 13.6  | 19.3  | 16.6  | 15.2  |
|        |       |       |       |       |
| 250631 | 26.3  | 24.2  | 25.1  | 31.9  |
| 283875 | 39    | 39.5  | 58.1  | 39.7  |
| 431816 | 51.3  | 44.1  | 45.3  | 49.6  |
| 431659 | 26.1  | 20.4  | 28.4  | 17.8  |
| 399752 | 10.5  | 9.9   | 8.8   | 9.8   |
| 398411 | 228.3 | 211.1 | 259.3 | 227.2 |
| 436546 |       |       | 3.3   |       |
| 450846 | 16.1  | 16.2  | 9.3   | 11.9  |
| 315543 | 95.7  | 92.2  | 147   | 111   |
| 448076 | 15.6  | 8.6   | 18.6  | 7.1   |
| 379614 | 13.5  | 12.6  | 11.7  | 11    |
|        |       |       |       |       |
| 379663 | 18.3  | 12    | 10.4  | 10.6  |
| 406603 | 12.9  | 14.1  | 15.2  | 9.9   |
| 318241 | 7.5   | 6.3   | 7.9   | 8.5   |
| 453679 | 44.7  | 47.4  | 70.7  | 48.2  |
| 250254 | 17.8  | 15.1  | 19.3  | 16.9  |
| 323691 | 1.6   |       |       |       |
| 270550 | 6.9   | 2.6   | 5     | 5.9   |
| 377293 | 155.2 | 131   | 146.4 | 143.3 |
| 451682 | 7     | 6.7   | 6.9   | 5.3   |
| 387461 | 16.5  | 17.8  | 18.2  | 14.6  |
| 380021 | 7.2   | 10.2  | 14    | 8     |
| 379665 | 2.8   | 2.7   | 3.1   | 2.1   |
| 382422 | 15.5  | 16.9  | 22.1  | 20.9  |

|        |       |       |       |       |
|--------|-------|-------|-------|-------|
| 382313 | 22.5  | 27.3  | 27.6  | 27.5  |
| 382312 | 17    | 22.3  | 26.8  | 20.9  |
| 382202 | 39.4  | 40.1  | 41.9  | 47.1  |
| 382009 | 14.3  | 10.7  | 7.5   | 7.9   |
| 381560 | 23    | 27    | 33.4  | 27.9  |
| 450713 | 7.7   | 8.8   | 11.7  | 10.7  |
| 450793 | 18.2  | 19.9  | 18.2  | 15.5  |
| 450374 |       | 1.4   | 3.1   | 2.2   |
| 449021 | 43    | 77.6  | 77.5  | 95.7  |
| 398735 | 2.9   | 3.4   | 5.7   | 7.3   |
| 398638 | 7.5   | 8.3   | 6.3   | 8.7   |
| 449552 |       | 3.1   |       | 1.7   |
| 451090 | 10.7  | 10.1  | 10.1  | 10.1  |
| 389619 | 3.1   | 6.8   | 3.3   | 5.5   |
| 451263 | 6.4   | 6.7   | 6.2   | 6.5   |
| 451177 | 7.1   | 5.6   | 8.9   | 7.9   |
| 450848 | 9.9   | 10.7  | 10.5  | 9.4   |
| 450917 | 9.5   | 11    | 10.3  | 9.4   |
| 451003 | 6.7   | 3.2   | 5.1   | 7.5   |
| 391066 |       | 1.2   | 1.7   |       |
| 364001 | 1.8   |       | 1.9   |       |
| 363918 | 1.4   | 1.4   | 2.3   |       |
| 363805 | 2.9   | 3.3   | 5.4   | 7.1   |
| 363666 | 12.8  | 13    | 15.6  | 12.6  |
| 363660 | 6.2   | 3.3   | 8.2   | 5.9   |
|        |       |       |       |       |
| 353947 | 20.2  | 13.6  | 12.1  | 18.1  |
| 358127 | 44.6  | 39.5  | 30.6  | 33.6  |
| 358129 | 19.8  | 20.5  | 18.5  | 18.6  |
| 375880 | 21.7  | 17.5  | 18.2  | 18.6  |
| 376011 | 85.9  | 69.2  | 51    | 70.8  |
| 376052 | 65    | 46.3  | 34.3  | 43.1  |
| 376867 | 7.4   | 11.2  | 11.7  | 9.7   |
| 376749 | 20.7  | 23.4  | 18.1  | 19.9  |
| 376617 | 12.9  | 21.6  | 20.7  | 21    |
| 376496 | 20    | 25.9  | 27.7  | 25.9  |
| 376403 | 12.3  | 15.9  | 14.3  | 13.6  |
| 376051 | 6     | 7.1   | 8.3   | 7.8   |
| 376289 | 16    | 18.3  | 17.7  | 16.7  |
| 453817 | 119   | 125.8 | 160.3 | 127.2 |
| 376206 | 10.6  | 15.1  | 12.6  | 13.4  |
| 376123 | 11.2  | 12.3  | 12.1  | 11.8  |
| 376964 | 9.8   | 7     | 6.3   | 7     |
| 377739 | 52.6  | 62    | 77.7  | 63.6  |
| 377727 | 43.1  | 48.3  | 65.4  | 57.2  |
| 377617 | 13.5  | 14    | 16.4  | 17.3  |
| 455707 | 31.6  | 30.2  | 26.8  | 28.3  |
| 455742 | 21.3  | 18    | 19.2  | 16.6  |
| 455627 | 28.1  | 30.8  | 30.8  | 31.6  |
| 455593 | 25    | 20.3  | 16.1  | 17.3  |
| 371320 | 93.2  | 92.3  | 71.9  | 85.3  |
| 371442 | 123.8 | 102.3 | 63.4  | 82.1  |

|        |       |      |       |      |
|--------|-------|------|-------|------|
| 428858 | 22.9  | 21.3 | 15.6  | 21.3 |
| 444006 | 2.8   | 6.1  | 3.1   | 7.2  |
| 444082 | 7.5   | 5.2  | 4.9   | 2.9  |
| 428002 | 18.5  | 20.7 | 14.4  | 18.7 |
| 429991 | 29.1  | 25.8 | 49.4  | 34.2 |
| 429970 | 69.8  | 73.2 | 131.7 | 77.9 |
| 426749 | 11.5  | 10.4 | 11.2  | 12.7 |
| 426948 | 6.2   | 6.5  | 3.1   | 5.4  |
| 426837 | 7     | 8.7  | 12.1  | 8.4  |
| 439220 | 7.6   | 7.6  | 5.4   | 6.7  |
| 432049 | 12.8  | 9.4  | 11.1  | 11.1 |
| 431820 | 29.7  | 24.4 | 36.6  | 26.9 |
| 441389 | 39.2  | 31.2 | 20.2  | 30.7 |
| 441809 | 55.9  | 57.7 | 45.7  | 60.2 |
| 441719 | 12.4  | 17.9 | 17.2  | 15.1 |
| 433410 | 68.4  | 58.4 | 53.7  | 58.4 |
| 406497 | 3     | 9.7  | 8.6   | 11.7 |
| 404927 | 49.3  | 58.6 | 62.8  | 63.2 |
| 404924 | 62    | 70.6 | 76.9  | 76.6 |
| 405443 | 2.1   | 3    | 3.2   | 5.9  |
| 405303 | 12.2  | 10.8 | 11.1  | 14.1 |
| 405208 | 6.6   | 8.2  | 2.9   | 6.4  |
| 405122 | 6     | 3.2  | 9.7   | 7.9  |
| 405033 | 35.3  | 34.4 | 32.7  | 41.7 |
| 406913 | 16.2  | 15.2 | 14    | 15.7 |
| 446800 | 125.5 | 148  | 168   | 149  |
| 446801 | 15.8  | 16.1 | 15.4  | 14.1 |
| 406556 | 2.3   | 2.2  | 1.9   | 2.8  |
| 406554 | 6.2   | 11   | 9.3   | 10.3 |
| 406833 | 2.7   | 3.3  | 2.9   | 5.6  |
| 400205 | 15.5  | 11.7 | 14.6  | 16.6 |
| 448471 | 7.2   | 6.4  | 9.6   | 5.1  |
| 448979 | 18.9  | 21.4 | 23.9  | 25.6 |
| 399971 | 89.7  | 88.1 | 85.6  | 78.2 |
| 399966 | 23.5  | 25.6 | 26.4  | 30.9 |
| 404034 | 9.3   | 7.6  | 10.8  | 8.3  |
| 403937 | 10.4  | 14.1 | 17.7  | 11.3 |
| 448014 | 14.8  | 14.6 | 35.4  | 23.2 |
| 448022 | 2.3   | 4.7  | 18    | 9.9  |
| 403838 | 12    | 15.5 | 20.5  | 16   |
| 403569 | 2.8   | 7    | 7     | 5.4  |
| 446294 | 27.4  | 39.5 | 38.9  | 37.9 |
| 446300 | 21.4  | 28.2 | 26.4  | 29   |
| 421958 | 6.4   | 6.1  | 7.5   | 7.6  |
| 419679 | 19.6  | 16.5 | 30    | 13.2 |
| 419652 | 6.1   | 9.7  | 6.2   | 7.8  |
| 419492 | 13.1  | 16.7 | 16.3  | 15.1 |
| 419390 | 16.3  | 20.4 | 21.1  | 20.8 |
| 419282 | 1.9   |      | 3.4   | 2    |
| 419553 | 1.7   | 5    | 2.5   | 2.2  |
| 410991 | 28.3  | 23.6 | 19.1  | 26   |
| 411171 | 37.7  | 29.9 | 23.9  | 32.2 |

|        |       |       |       |       |
|--------|-------|-------|-------|-------|
| 446562 | 20.2  | 32.9  | 21.8  | 39.8  |
| 446563 | 32.2  | 53.6  | 44    | 83.7  |
| 412384 | 11.2  | 9.1   | 5.8   | 3.4   |
| 446430 | 144.7 | 152.7 | 136.8 | 147.5 |
| 446440 | 48.7  | 53    | 49.9  | 51.7  |
| 466290 | 12.7  | 14.2  | 16.8  | 20.1  |
| 325409 | 29.2  | 32.7  | 18.8  | 31    |
| 465847 | 15.8  | 15.5  | 10.2  | 17.5  |
| 321420 | 19.5  | 20.6  | 24.1  | 25.2  |
| 474190 | 16.4  | 16.3  | 18.8  | 21    |
| 321557 | 19.4  | 19.4  | 23    | 26.6  |
| 289790 | 18.1  | 13    | 20.6  | 15.9  |
| 321687 | 20    | 17.1  | 22.2  | 21.2  |
| 289899 | 13.8  | 11.4  | 12.5  | 10.6  |
| 474921 | 58.1  | 91    | 122.6 | 121.9 |
| 281668 | 21.8  | 24.1  | 49.6  | 27.9  |
| 281682 | 58.1  | 56    | 87.8  | 60.3  |
| 283384 | 12.2  | 18.5  | 23.3  | 21.2  |
| 474903 | 77.7  | 97.3  | 118.5 | 107.9 |
| 283488 | 25.5  | 33.2  | 35.1  | 31.1  |
| 283498 | 10.2  | 10.9  | 11.8  | 11.2  |
| 474904 | 290.7 | 338.4 | 430.2 | 369.1 |
| 335630 | 95.7  | 103.6 | 105.4 | 121.8 |
| 303273 | 6.6   |       | 9.6   |       |
| 313502 | 32.1  | 40.6  | 58.6  | 41.4  |
| 303274 | 7.8   |       | 18.9  |       |
| 313375 | 27.9  | 30    | 42.5  | 28.5  |
| 314486 | 39.4  | 36.5  | 31.1  | 39.7  |
| 314390 | 45.6  | 46.2  | 36.2  | 34.7  |
| 470180 | 28.2  | 33.9  | 46    | 39    |
| 311279 | 39.6  | 88.6  | 33    | 77.2  |
| 319023 | 5.9   | 5.8   | 3.1   | 5.6   |
| 344665 | 36.2  | 33.2  | 25.8  | 26.1  |
| 345057 | 18.5  | 23.9  | 21.5  | 25.5  |
| 345207 | 15.4  | 18.9  | 18.3  | 20.2  |
| 344686 | 14.6  | 15.8  | 16.6  | 13.8  |
| 266912 | 110.5 | 110.9 | 125.9 | 115.4 |
| 266797 | 101.8 | 121.7 | 155.2 | 131.9 |
| 266746 | 107.7 | 110.2 | 109.3 | 97.2  |
| 266704 | 100.8 | 110.3 | 133.7 | 122.2 |
| 258714 | 15.4  | 5.6   | 27.9  | 2.5   |
| 459252 | 39.5  | 31.2  | 27.5  | 25.8  |
| 258713 | 14.4  | 9.6   | 20.8  | 9.5   |
| 459242 | 35.9  | 31.3  | 31.8  | 27.6  |
| 348725 | 12.8  | 14.3  | 15    | 10.6  |
| 475420 | 23.8  | 33.3  | 40    | 45.3  |
| 475412 | 15.6  | 16.6  | 20.1  | 19.8  |
| 345958 | 20.9  | 22.2  | 24.6  | 22.2  |
| 475258 | 12.6  | 11.3  | 18    | 12.4  |
| 345504 | 18.2  | 21.4  | 22.1  | 22.5  |
| 345357 | 24.4  | 25.8  | 31.6  | 25.5  |
| 345808 | 22.4  | 34.3  | 35.4  | 33    |

|        |       |       |       |       |
|--------|-------|-------|-------|-------|
| 345646 | 19.9  | 22.4  | 23.7  | 20.8  |
| 475286 | 40.6  | 40.2  | 43    | 60.3  |
| 475287 | 23.4  | 22.8  | 18.9  | 23.6  |
| 351644 | 39.5  | 36.5  | 40.9  | 37.1  |
| 351689 | 12.3  | 11.9  | 10.4  | 9.7   |
| 351538 | 2.4   | 1.6   | 2.3   | 1.4   |
| 474996 | 219.5 | 257.3 | 230.9 | 312   |
| 475722 | 2.9   | 2.6   | 3     | 2.4   |
| 351971 | 2     |       |       | 2.4   |
| 278659 | 6.6   |       | 15.7  |       |
| 351830 | 43.2  | 43.3  | 41.4  | 45.7  |
| 338152 | 46.7  | 50.6  | 53.4  | 52.1  |
| 281590 | 18.3  | 15.6  | 21.9  | 16.6  |
| 281606 | 48.6  | 46.2  | 69.8  | 48.9  |
| 336431 | 67.8  | 70.5  | 58.6  | 74    |
| 281519 | 58.7  | 55.3  | 77.9  | 50.6  |
| 475060 | 433.9 | 542.7 | 600.3 | 566.9 |
| 270816 | 9.6   | 7.6   | 7.2   | 7.4   |
| 270689 | 14    | 12    | 14.9  | 9.6   |
| 270609 | 9.1   | 5.7   | 8     | 10.5  |
| 475070 | 51.7  | 58.5  | 75    | 76.4  |
| 474995 | 51.2  | 59.9  | 35.5  | 62.4  |
| 475085 | 26.3  | 26.2  | 35.2  | 35.6  |
| 405583 | 6.1   | 5.9   | 2.9   | 3.3   |
| 321775 | 10.9  | 14.4  | 9.8   | 10.4  |
| 403918 | 6.6   | 7.3   | 13.3  | 9.9   |
| 377384 | 22.7  | 22.9  | 26.7  | 25.9  |
| 447927 | 3.1   | 2     | 5.6   | 3.2   |
| 400078 | 26.8  | 26.7  | 24.9  | 24.9  |
| 428060 | 13.2  | 10.9  | 11.2  | 14.6  |
| 376071 | 40.9  | 44.7  | 38.8  | 37.7  |
| 344685 | 13.1  | 11    | 11.8  | 12.1  |
| 446437 | 32.8  | 26.5  | 35.5  | 27.9  |
| 344995 | 13    | 14.7  | 13.8  | 15.4  |
| 367398 | 1.9   |       |       | 1.5   |
| 424173 | 23.7  | 19    | 22.3  | 16.6  |
| 286333 | 110.3 | 134.4 | 146.4 | 136.3 |
| 381583 | 2.2   | 2     | 2.5   |       |
| 394447 | 57.3  | 50.4  | 51.6  | 56.3  |
| 394449 | 50    | 41.5  | 37.3  | 45.8  |
| 377325 | 5.4   | 7.6   | 6.6   | 7.6   |
| 321119 | 28.4  | 26.5  | 31    | 23.5  |
| 338069 | 14.2  | 13.3  | 17    | 22.5  |
| 431678 | 16    | 10.2  | 13.6  | 10.6  |
| 371436 | 109   | 117.1 | 121.9 | 104.2 |
| 428861 | 37    | 25.7  | 26.3  | 31.2  |
| 446292 |       | 2.6   | 2.1   |       |
| 338484 | 54.5  | 45.3  | 50.4  | 55.1  |
| 412761 |       | 1.5   | 2.2   |       |
| 441273 | 11.9  | 13.4  | 9.4   | 17.2  |
| 266810 | 104.9 | 125.7 | 136.7 | 121.9 |
| 283367 | 16.1  | 22    | 16.7  | 21.5  |

|        |       |       |       |       |
|--------|-------|-------|-------|-------|
| 283429 | 79.5  | 75.3  | 102.7 | 95.3  |
| 399858 | 33.5  | 46.1  | 51.5  | 52.9  |
| 448348 | 2.4   | 2.8   | 2.3   | 6.2   |
| 448348 | 2.4   | 2.8   | 2.3   | 6.2   |
| 433412 | 129.6 | 109.2 | 79.8  | 96.5  |
| 266926 | 18.9  | 19.5  | 15.7  | 16.9  |
| 370831 | 78.3  | 63    | 52.9  | 69.2  |
| 371677 | 94.7  | 100.9 | 101.8 | 127.1 |
| 419432 |       | 1.3   | 1.8   |       |
| 314039 | 33.2  | 35.6  | 31.1  | 33.1  |
| 270530 | 6.7   | 2.6   | 6.8   | 5.4   |
| 339223 | 17.3  | 20.7  | 23    | 22.9  |
| 352063 |       | 1.9   |       | 2.7   |
| 345139 | 6.9   | 8.4   | 6.8   | 8.6   |
| 398497 | 5.4   | 6     | 6     | 5.3   |
| 314593 | 17.2  | 7.7   | 8.7   | 10.4  |
| 321893 | 10.2  | 11    | 10.1  | 10    |
| 375955 | 99.1  | 121.3 | 98.6  | 112.1 |
| 425045 | 46.4  | 38.5  | 34.4  | 41.1  |
| 376050 | 6.4   | 5.3   | 5.2   | 6.5   |
| 376326 | 1.6   | 2.3   |       | 1.9   |
| 341208 | 95.8  | 116   | 117.4 | 130.6 |
| 373175 | 60.6  | 70.2  | 79.2  | 73.2  |
| 270873 | 6.1   | 3.3   | 7.4   | 5.8   |
| 459124 | 22.5  | 23.6  | 30.8  | 24.5  |
| 348518 | 2.8   | 1.3   | 3.1   | 2.6   |
| 352216 | 2.2   | 3     | 3.2   | 2.5   |
| 377049 | 7.6   | 7.7   | 8.5   | 6.8   |
| 398421 | 27.3  | 27.8  | 29.6  | 30.8  |
| 371019 | 36.5  | 39.3  | 48.6  | 40.3  |
| 266714 | 55.8  | 57.6  | 65.7  | 63.6  |
| 371561 | 147.6 | 141.7 | 139.2 | 175.6 |
| 441703 | 1.8   | 1.6   | 2.4   | 1.8   |
| 406815 | 2.2   | 2.8   | 1.7   | 6     |
| 344903 | 7.4   | 10.7  | 10.9  | 8.5   |
| 394373 | 45.6  | 39.1  | 24.4  | 35.5  |
| 411006 | 5.7   | 2.2   | 2.3   | 3.3   |
| 398942 | 9.4   | 6.5   | 7.2   | 11    |
| 345639 | 5.9   | 5.2   | 2.7   | 3     |
| 412494 |       |       | 1.5   | 1.8   |
| 379556 | 2.6   | 2.6   | 2.1   | 1.9   |
| 375852 | 33    | 21.2  | 28.2  | 21.8  |
| 377218 | 72.4  | 52.4  | 28.5  | 46.4  |
| 367448 |       |       | 1.4   |       |
| 403811 | 8.3   | 10.8  | 12.4  | 11.7  |
| 381658 | 16.8  | 16    | 15.4  | 16    |
| 450723 | 14.9  | 3     | 5.6   |       |
| 320839 | 5.7   | 3.1   | 5.4   | 5.4   |
| 433305 | 7.9   | 24.9  | 14.4  | 25.4  |
| 345347 | 11.8  | 9.9   | 10.7  | 9.6   |
| 465945 | 5.5   | 3.2   | 4.8   | 6.2   |
| 344498 | 22.6  | 20.3  | 18.7  | 13.3  |



|        |      |       |       |       |
|--------|------|-------|-------|-------|
| 382080 | 3.2  | 1.5   | 3     | 3     |
| 339078 | 35.2 | 57.4  | 73.9  | 63.6  |
| 315936 | 2.1  |       |       | 2.1   |
| 419557 | 3.1  | 2.2   | 3     | 2.7   |
| 453479 | 20.1 | 21.6  | 38.4  | 20.4  |
| 452272 | 3.4  | 5.9   | 5.5   | 3.3   |
| 344844 | 9.5  | 6.8   | 7     | 7.1   |
| 286226 | 89.4 | 122.5 | 157.1 | 135.4 |
| 431121 | 2.6  |       |       | 1.4   |
| 281501 | 5.8  | 6.5   | 9.7   | 6.6   |
|        |      |       |       |       |
| 343778 | 9.2  | 10.3  | 9.7   | 9.7   |
| 270701 | 8.7  | 7.7   | 6.7   | 7.2   |
| 433304 | 12.7 | 26.2  | 18.4  | 35.8  |
| 264967 | 55.9 | 61.1  | 74.4  | 56    |
| 309223 | 29.8 | 31.4  | 33.4  | 36.8  |
| 456332 | 18   | 10.9  | 11.1  | 12.2  |
| 451787 | 1.8  | 1.9   | 2.5   | 2.8   |
| 270596 | 3    | 2.6   | 2.9   | 3.3   |
| 280492 | 24.3 | 23.5  | 24.5  | 25.2  |
| 345496 | 2.6  | 1.9   | 3.4   | 2     |
| 431956 | 10.1 | 6     | 8.7   | 5.5   |
| 410822 | 3.1  | 5.5   | 2.8   | 3.4   |
| 266593 | 13.1 | 20.7  | 28    | 23.3  |
|        |      |       |       |       |
| 455127 | 2.2  | 5.4   | 3.4   | 3.1   |
| 371373 | 308  | 253.9 | 240.3 | 250.8 |
| 457633 |      | 1.3   |       | 2.2   |
| 377127 | 5.2  | 5     | 3.1   | 2.7   |
| 431930 | 10.4 | 12.1  | 11.4  | 12.4  |
| 452289 | 23.1 | 19.6  | 16.5  | 18.6  |
| 291743 | 10.9 | 8     | 5.2   | 4.7   |
| 311369 | 6.4  | 3     | 5.2   | 2.9   |
| 357965 | 5.8  | 5     | 3.2   | 6.1   |
| 455611 | 2.5  |       |       | 1.7   |
| 313627 | 12.1 | 11.7  | 13.2  | 10.8  |
| 309152 | 21.1 | 36.1  | 37.2  | 38    |
| 387597 | 17.9 | 15.5  | 23.7  | 14.2  |
| 351793 | 14.2 | 14.6  | 17.7  | 12.4  |
| 344529 | 11.9 | 14.7  | 15.7  | 12    |
| 351666 | 6.7  | 2.8   | 2.4   | 2.8   |
| 380120 | 2.8  | 5.3   | 2.7   | 5     |
| 325497 | 7.4  | 3.1   |       | 2.5   |
| 451931 | 37.8 | 39.6  | 40.8  | 44.8  |
| 451909 | 43.8 | 36.4  | 40.9  | 37.8  |
| 384914 | 10.2 | 6.1   | 6.9   | 8.7   |
| 384843 | 8    | 5.5   | 2.6   | 2.4   |
| 384163 | 11.3 | 11    | 11    | 9.2   |
| 383558 | 3.2  | 2.9   | 2.4   | 2.1   |
| 452133 | 26.5 | 29.9  | 35.8  | 26.5  |
| 383580 | 8.1  | 9.6   | 10.1  | 8.6   |
| 384013 | 13.4 | 11.4  | 11.8  | 11.5  |

|        |       |       |       |       |
|--------|-------|-------|-------|-------|
| 452028 | 25    | 21.4  | 28.5  | 13.7  |
| 452033 | 6     | 2.6   | 9.8   | 3.1   |
| 452046 | 23.2  | 21.9  | 24.2  | 26.1  |
| 383644 | 34.3  | 24    | 21.7  | 17.1  |
| 386812 | 1.9   |       |       |       |
| 386288 |       | 1.4   | 1.8   |       |
| 386570 | 5.3   | 1.8   | 3.4   | 1.9   |
|        |       |       |       |       |
| 387369 | 10.6  | 11.1  | 11.8  | 8.9   |
| 387204 | 19.6  | 16.7  | 18.1  | 20.2  |
| 387062 | 21.6  | 5     | 10.7  | 8.7   |
| 387060 | 7.4   | 2     | 2.3   |       |
| 387023 | 54.6  | 14    | 28.4  | 24    |
| 385282 | 6.9   | 5.5   | 5.3   | 3.1   |
| 385190 | 2.5   | 2     | 5.6   | 3.3   |
| 385477 | 12.9  | 13.7  | 12.6  | 12.6  |
| 386021 | 8.8   | 7.3   | 7.1   | 8.6   |
| 385937 | 13.1  | 9.7   | 9.4   | 9.5   |
| 385925 | 29    | 19    | 20.6  | 18.4  |
| 385911 | 48.6  | 31.6  | 35    | 29.8  |
| 385827 | 15.2  | 13    | 12.2  | 9.3   |
| 385827 | 15.2  | 13    | 12.2  | 9.3   |
| 385801 | 2.3   |       |       |       |
| 385801 | 2.3   |       |       |       |
| 385777 | 2.6   | 2.4   | 3.3   | 2.3   |
| 385750 | 2.9   | 2.1   | 2.1   | 1.8   |
| 385732 | 31.1  | 21.4  | 25.5  | 23.2  |
| 385725 | 3.2   |       | 2.5   |       |
| 385725 | 3.2   |       | 2.5   |       |
| 385678 | 2.1   | 1.8   | 2.1   |       |
| 383082 | 7.9   | 2.9   | 6.7   | 5.3   |
|        |       |       |       |       |
| 380638 | 2.9   | 6     | 1.9   | 7     |
| 453220 | 19.7  | 20.3  | 24.7  | 20.3  |
| 453157 | 64.9  | 61.3  | 100.4 | 62.3  |
| 453221 | 190.3 | 156.5 | 164.8 | 107.3 |
| 453274 | 66.1  | 52.9  | 89.6  | 59.4  |
| 453131 | 87.5  | 80.4  | 130.9 | 97.1  |
| 452999 | 19.4  | 16    | 17.7  | 19.1  |
| 452340 | 12.5  | 10.4  | 7.5   | 13.3  |
| 452429 | 16.4  | 10.9  | 16    | 9.4   |
| 381373 | 10.2  | 5.2   | 8.5   | 11    |
| 452754 | 31.2  | 25.1  | 24.8  | 27.7  |
| 381427 | 16.9  | 14.1  | 13.4  | 15.1  |
| 452446 | 15.6  | 6.5   | 14.6  | 7.6   |
| 452476 | 95.2  | 90.6  | 78.8  | 75.1  |
| 381445 | 12    | 7.8   | 7.8   | 11    |
| 381436 | 14    | 7.4   | 8.4   | 11.7  |
| 395769 | 18.9  | 20.6  | 23.9  | 14.7  |
| 396463 | 33.9  | 27.9  | 36.4  | 27.6  |
| 396415 | 26.7  | 19.4  | 24.4  | 23.5  |
| 396340 | 76.8  | 58.5  | 71.1  | 68.3  |

|        |       |      |       |      |
|--------|-------|------|-------|------|
| 396203 | 49.4  | 43.1 | 51.8  | 42.3 |
| 396202 | 65.4  | 60.9 | 100.2 | 81.9 |
| 396235 | 59.7  | 49.6 | 63    | 49   |
| 394062 | 25.2  | 19.1 | 21.8  | 15.7 |
| 394048 | 39.3  | 29.9 | 33.8  | 31.2 |
| 393688 | 12    | 8.7  | 11.1  | 8.6  |
| 394169 | 40.3  | 31.7 | 34.9  | 35.8 |
| 394196 | 50.1  | 41.1 | 38.6  | 35.8 |
| 394865 | 46.5  | 36.1 | 42.1  | 41.8 |
| 394434 | 25.2  | 21.5 | 17.2  | 19.5 |
| 396519 | 37.5  | 33.2 | 41.9  | 33.9 |
| 397788 | 14.3  | 19.4 | 50.8  | 26.9 |
| 397834 | 24.6  | 22.4 | 24.5  | 27.6 |
| 398861 | 9.3   | 8.5  | 8.2   | 8.4  |
| 449190 | 44.3  | 35   | 115.2 | 34.7 |
| 449230 | 25    | 20.8 | 66.1  | 28.6 |
| 393630 | 65.9  | 72.7 | 61.7  | 70.6 |
| 397126 | 42.1  | 38.4 | 64.8  | 39.6 |
| 397100 | 23.2  | 27.2 | 45.2  | 32.3 |
| 396910 | 31.5  | 51.1 | 64.1  | 81.2 |
| 396600 | 36.3  | 28.6 | 31.2  | 26.7 |
| 397141 | 6.1   | 5.7  | 9.4   | 2    |
| 449642 | 23    | 19.1 | 22.4  | 18.8 |
| 449639 | 12.2  | 13.1 | 17.4  | 13.9 |
| 397273 | 16.1  | 15.9 | 20.7  | 19.3 |
| 397208 | 40.9  | 44.3 | 67    | 38.8 |
| 397181 | 23.8  | 29   | 43.2  | 35.4 |
| 389551 |       | 1.6  |       |      |
|        |       |      |       |      |
|        |       |      |       |      |
|        |       |      |       |      |
|        |       |      |       |      |
| 388764 | 9.8   | 5.9  | 4.7   | 7    |
| 388709 | 17.2  | 13   | 13.4  | 16.6 |
| 451234 | 51.1  | 44.1 | 39.4  | 42.5 |
| 390166 | 1.4   | 1.6  | 2.1   | 1.9  |
| 391543 | 55.5  | 46.6 | 59.1  | 50.5 |
| 391494 | 2.2   | 6    | 5.3   | 1.5  |
| 453290 | 147.6 | 119  | 105   | 68.9 |
| 362890 | 5.5   | 6.2  | 7.5   | 3.2  |
| 362764 | 4.9   |      | 2.2   | 2.1  |
| 363037 | 2.8   | 2.8  | 3     | 2.8  |
| 363412 | 7.8   | 7.3  | 6.9   | 6.5  |
| 363397 | 13    | 9.1  | 12.9  | 10.4 |
| 363290 | 6.6   | 8.5  | 9.4   | 7.9  |
| 363053 | 14    | 8.5  | 14.4  | 12   |
| 363264 | 11.2  | 8.3  | 15.8  | 7.2  |
| 363184 | 6.4   | 7.4  | 9.8   | 7    |
| 363159 | 2.3   | 1.6  | 1.8   |      |
| 362039 | 5     | 3.1  | 8.4   | 5.5  |
| 361954 | 22.1  | 21.8 | 30.8  | 22.4 |
| 360781 | 2.4   | 2.4  | 6     |      |

|        |      |      |      |      |
|--------|------|------|------|------|
| 361890 | 14.9 | 12.6 | 17.5 | 17.6 |
| 361860 | 11.8 | 10.9 | 14.1 | 13.9 |
| 361831 | 59.6 | 45.1 | 27.9 | 22.2 |
| 361784 | 44.4 | 42.9 | 56   | 43.4 |
| 361750 | 13.7 | 12.6 | 16.9 | 11.1 |
| 361721 | 6.6  | 3.3  | 10   | 5.7  |
| 361662 | 22.5 | 18.1 | 24.9 | 25.4 |
| 361591 | 3.2  | 5.2  | 2.8  | 2.7  |
| 361036 | 6.9  | 4.9  | 6.4  | 2.5  |
| 363512 | 11.9 | 9.9  | 12.8 | 9.4  |
| 363533 | 7.2  | 8.9  | 10   | 7.8  |
| 363562 | 2.5  |      | 1.9  |      |
| 456233 | 30.5 | 23.9 | 37.4 | 26.8 |
| 363987 | 2.7  | 1.3  | 2.5  | 1.5  |
| 363969 |      |      | 1.6  |      |
| 363899 | 5.9  | 3    | 5    | 7.5  |
| 363871 | 1.7  | 2.6  | 2.8  |      |
| 364084 | 3.4  | 1.8  | 1.5  | 2.4  |
| 363784 | 7.5  | 5.5  | 7.2  | 6.6  |
| 363754 | 2.6  |      | 2.5  | 1.7  |
| 363656 | 8.8  | 5.6  | 9.3  | 6.5  |
| 363635 | 2.5  | 1.9  | 2.3  | 2.1  |
| 355107 | 9.6  | 7.2  | 9.4  | 5.6  |
| 354961 | 25.6 | 15.1 | 18.4 | 15.3 |
| 354950 | 90.8 | 66.1 | 78.3 | 63   |
| 354431 | 8.7  | 2.8  | 3.2  | 2.7  |
| 355777 | 15   | 14.6 | 16.7 | 16.4 |
| 355723 | 11.8 | 11.4 | 11.8 | 13.9 |
| 355717 | 3.2  | 2.5  | 3    |      |
| 355653 | 52.1 | 32.3 | 46   | 35.9 |
| 358439 | 15.5 | 11   | 11.9 | 10.6 |
| 358436 | 75.1 | 56.8 | 66.5 | 58.4 |
| 358326 | 55.3 | 48.3 | 60.6 | 55.5 |
| 358291 | 7.3  | 11   | 9.9  | 9.9  |
| 358472 | 69.1 | 47.5 | 55   | 43.9 |
| 359515 | 14.5 | 11.1 | 14.4 | 8    |
| 359397 | 13.7 | 11.5 | 17.3 | 14   |
| 356930 | 24.3 | 19.1 | 26.1 | 22.3 |
| 356895 | 12.1 | 11.3 | 13.1 | 12   |
| 356776 | 38.6 | 35   | 23.6 | 21.2 |
| 356722 | 17.8 | 13.4 | 19.1 | 15.9 |
| 356382 | 1.8  | 1.6  | 1.9  | 1.8  |
| 357015 | 38.6 | 29.4 | 30.5 | 30.3 |
| 357051 | 27.5 | 20.8 | 28.2 | 24.9 |
| 357122 | 9    | 6.5  | 5.9  | 5.9  |
| 357589 | 12.3 | 7.7  | 9.5  | 9.7  |
| 357543 | 17.2 | 14.7 | 17.4 | 16.1 |
| 357415 | 17.7 | 11.5 | 14   | 11.6 |
| 357380 | 9.6  | 6.8  | 8    | 5.5  |
| 357296 | 15.2 | 9.9  | 13.2 | 9.7  |
| 357259 | 6.8  | 3.1  | 7.7  | 1.5  |
| 357154 | 24.4 | 17.9 | 22.7 | 20.6 |

|        |       |       |       |       |
|--------|-------|-------|-------|-------|
| 376741 | 177.7 | 115.5 | 115.8 | 105.7 |
| 376666 | 14.4  | 13.9  | 14.4  | 13.3  |
| 376271 | 52.6  | 34.8  | 45.1  | 35.6  |
| 374351 | 95.9  | 65.6  | 83    | 74.7  |
| 454439 | 66.8  | 63.5  | 58.4  | 59.9  |
| 374277 | 46.7  | 38.4  | 55.5  | 37.3  |
| 454646 | 159.8 | 125.7 | 180   | 146.6 |
| 375420 | 217.8 | 134.5 | 132.9 | 125.3 |
| 375419 | 36.1  | 24.7  | 26.5  | 19.6  |
| 375409 | 34.2  | 15.1  | 20.6  | 15    |
| 375347 | 18.6  | 14.4  | 21.1  | 14.8  |
| 375302 | 38.1  | 38.4  | 49    | 47    |
| 375294 | 11    | 8.5   | 10.7  | 9.3   |
| 374996 | 25.5  | 21.6  | 26.2  | 26.4  |
| 376900 | 27.3  | 19.7  | 29.8  | 16.8  |
| 453451 | 15.1  | 12.2  | 15.9  | 16.6  |
| 453328 | 25.2  | 24.6  | 34.8  | 26.2  |
| 453364 | 22.4  | 17    | 24.5  | 18.6  |
| 453374 | 39.1  | 35.3  | 46.7  | 31    |
| 377438 | 89.2  | 75.7  | 91.2  | 77.6  |
| 377342 | 131   | 108.1 | 133.7 | 116.7 |
| 377446 | 59.3  | 35.5  | 46.1  | 36.8  |
| 377595 | 46    | 42.9  | 46.7  | 43.4  |
| 377519 | 113.1 | 86.3  | 109.1 | 96.4  |
| 454770 | 48.1  | 30.5  | 48.7  | 39.4  |
| 454774 | 139.5 | 108.1 | 143.6 | 93.5  |
| 370095 | 98.7  | 81.3  | 86.9  | 80.8  |
| 455702 | 41.5  | 31.1  | 38.4  | 35    |
| 370186 | 35.9  | 27.9  | 36.3  | 30.7  |
| 370673 | 50.5  | 34.7  | 31.2  | 33    |
| 370514 | 120.2 | 103.5 | 100.7 | 102.7 |
| 370449 | 14.8  | 12.8  | 14.7  | 13.6  |
| 370294 | 70.6  | 60.3  | 69    | 64.7  |
| 455171 | 29.8  | 24.7  | 29.1  | 21.7  |
| 455036 | 67.5  | 56.2  | 72.3  | 48.8  |
| 454920 | 169.9 | 133.1 | 176.6 | 116.6 |
| 371367 | 171.8 | 174.2 | 224.8 | 189.1 |
| 371265 | 41.2  | 29.1  | 29.7  | 29.3  |
| 371141 | 90.6  | 61.7  | 66.6  | 62    |
| 370966 | 40.7  | 30.6  | 32.6  | 33.9  |
| 370956 | 78.5  | 52.1  | 62.2  | 61.5  |
| 370819 | 92.6  | 77.3  | 78.2  | 74.9  |
| 371407 | 89.9  | 63.7  | 68.6  | 55.6  |
| 371956 | 25    | 21.3  | 27.6  | 29.3  |
| 371852 | 37.9  | 27.2  | 34.2  | 28.3  |
| 371625 | 56.8  | 41.5  | 42.8  | 38.2  |
| 371543 | 90.5  | 59.5  | 69.5  | 67.7  |
| 371484 | 238.3 | 166.3 | 179.8 | 154.4 |
| 443708 | 7.6   | 3.2   | 5.1   | 5.8   |
| 443715 | 2.1   | 1.7   | 1.7   | 1.8   |
| 443772 | 6.6   | 5.4   | 6.4   | 2.9   |
| 443455 |       |       | 1.6   | 1.7   |

|        |       |       |       |       |
|--------|-------|-------|-------|-------|
| 429160 | 38.1  | 25.7  | 35.9  | 29.4  |
| 443578 | 2     | 2.2   | 2.8   | 2.5   |
| 443586 | 2.9   | 2.4   | 2.5   | 2.4   |
| 427805 | 191   | 173.9 | 214.3 | 207.8 |
| 444116 | 2.1   |       | 1.4   | 1.7   |
| 444180 | 1.3   |       |       |       |
| 443855 | 1.9   |       |       |       |
| 428244 | 30.2  | 23.5  | 23    | 22.2  |
| 428197 | 63.7  | 58.3  | 60    | 66.3  |
| 443942 | 5.2   | 1.8   | 2.3   | 6.1   |
| 428057 | 35.4  | 26.5  | 29.3  | 26.4  |
| 443098 |       | 1.6   | 1.9   |       |
| 430245 | 11.9  | 9.6   | 10.2  | 9.2   |
|        |       |       |       |       |
| 430991 | 18.9  | 17.4  | 19.8  | 12.9  |
| 430365 | 18.2  | 17.4  | 22.9  | 21.5  |
|        |       |       |       |       |
|        |       |       |       |       |
| 443321 | 1.5   | 1.7   | 2.1   | 2.4   |
| 443375 |       | 1.7   |       | 1.4   |
| 443239 | 2.5   |       |       |       |
| 445258 | 5.4   | 5.6   | 5.3   | 9.4   |
| 445286 | 8.6   | 7.2   | 9.2   | 10.4  |
| 445309 | 15.8  | 15.9  | 10.7  | 14    |
| 445445 | 27.1  | 19.6  | 21.3  | 27.4  |
| 445011 |       | 2     |       |       |
| 445020 | 1.9   | 1.5   |       |       |
| 445024 | 3.3   | 2.5   | 1.9   | 2     |
| 445134 | 6.7   | 1.7   | 3.4   | 2     |
| 445154 | 6.8   | 7     | 11.5  | 10.6  |
| 445168 | 12.8  | 11.4  | 8.9   | 6.6   |
| 445105 | 5.6   |       | 2.7   | 1.9   |
| 422340 | 142.3 | 95.2  | 157.6 | 97.8  |
| 422328 | 88.4  | 82.4  | 107.7 | 86.3  |
| 422327 | 47.1  | 49.1  | 61.7  | 50    |
| 422305 | 54.1  | 30.9  | 53.4  | 30.4  |
| 422275 | 616.2 | 374.8 | 596.4 | 351.7 |
| 422442 | 27.2  | 25    | 29    | 20.1  |
| 445522 | 15.9  | 14.6  | 20.7  | 16.7  |
| 445529 | 11.6  | 12.2  | 13.1  | 12.9  |
| 422582 | 14.3  | 12    | 18    | 15.4  |
|        |       |       |       |       |
| 422507 | 2.3   |       | 2     | 1.9   |
| 422506 | 12.7  | 10.7  | 15.9  | 12.8  |
| 422469 | 9.1   | 7.3   | 10.5  | 7.9   |
| 422448 | 7     | 6.8   | 8.7   | 6     |
| 422448 | 7     | 6.8   | 8.7   | 6     |
| 422442 | 27.2  | 25    | 29    | 20.1  |
| 444990 | 1.4   | 2.5   | 1.9   |       |
| 444407 | 1.8   |       | 3.2   | 2.1   |
| 444478 | 1.7   |       | 1.5   |       |
| 444501 | 2.4   |       | 1.6   | 2.9   |

|        |       |       |       |       |
|--------|-------|-------|-------|-------|
| 444557 | 2.2   | 2.2   |       |       |
| 426128 | 7.2   | 3.1   | 6.2   | 7.2   |
| 426116 | 15    | 13.4  | 15.4  | 14.8  |
| 426054 | 10.2  | 5.7   | 8.6   | 7.9   |
| 444577 | 1.8   | 2.8   | 2.3   | 1.9   |
| 425983 | 12.7  | 10.1  | 11.6  | 9.4   |
| 444271 | 2     |       | 1.9   |       |
| 444275 |       |       | 1.6   |       |
| 444380 |       | 2.1   | 1.4   | 2.5   |
| 444384 | 1.4   | 1.9   |       |       |
| 425923 | 22.4  | 14.8  | 26.9  | 15.8  |
| 444641 |       |       | 1.5   | 1.9   |
| 444776 | 3.1   | 1.8   | 3.3   | 2.4   |
| 444786 | 8.4   | 3.3   | 6.6   | 2.5   |
| 425626 | 64.3  | 66.8  | 62.7  | 59.8  |
| 425616 | 9.6   | 10.5  | 7.5   | 9.9   |
| 425508 | 127   | 142.6 | 248.1 | 178.7 |
| 425669 | 18.4  | 13.6  | 17.8  | 13.3  |
| 425425 | 228.5 | 186.6 | 180   | 212.7 |
| 444858 | 7.7   | 8.3   | 10.6  | 9.1   |
| 425230 | 41.6  | 24.3  | 21.3  | 26.6  |
| 444885 | 2.3   |       | 1.8   | 2     |
| 444896 | 2.4   | 3     |       | 2.9   |
| 425686 | 38.8  | 34.8  | 36.9  | 36.5  |
| 425693 | 33.3  | 35.9  | 50.7  | 39.5  |
| 425905 | 7.9   | 8.5   | 12.4  | 5.6   |
| 425892 | 119.3 | 104.6 | 129.2 | 108.3 |
| 425879 | 26.3  | 22.1  | 37.5  | 32.3  |
| 425855 | 15.5  | 15.9  | 24.7  | 17.6  |
| 444666 | 2     | 1.4   | 2.7   | 2.2   |
| 425832 | 38.4  | 36.6  | 55.6  | 37.7  |
| 425810 | 18.7  | 21.2  | 32.4  | 20.8  |
| 425781 | 16.2  | 18.2  | 29    | 20    |
| 425768 | 31.9  | 29.2  | 44.7  | 29.4  |
| 425751 | 21.2  | 24.2  | 31.9  | 20.5  |
| 425740 | 34    | 35.6  | 59.7  | 34.9  |
| 425727 | 30.3  | 34.4  | 40.4  | 27.5  |
| 444742 | 1.9   | 2.3   | 2.4   | 3.3   |
| 425711 | 28.2  | 25.4  | 38.5  | 25    |
| 440831 | 8.7   | 11.9  | 10.6  | 11.1  |
| 440853 | 24.3  | 21.9  | 24.7  | 25.5  |
| 440929 | 2.2   | 1.4   |       | 2     |
| 440932 | 5.4   | 3.2   | 2.8   |       |
| 440964 | 23.8  | 17.9  | 23.3  | 22.8  |
| 436049 | 24.1  | 20.9  | 18.5  | 20.1  |
| 440990 | 67.4  | 55    | 74.7  | 48.9  |
| 440997 | 2.4   | 2.2   | 2.2   | 2.4   |
| 437099 | 11.1  | 12.3  | 11.3  | 13.1  |
| 440447 | 2.3   |       |       | 2.6   |
| 440462 | 1.8   | 2.8   | 2.3   |       |
| 436989 | 11.5  | 10.4  | 10.7  | 11    |
| 440501 | 1.3   | 1.5   |       |       |

|        |      |      |      |      |
|--------|------|------|------|------|
| 440823 | 28.4 | 24.7 | 34.3 | 24   |
| 440597 | 6.3  | 2.5  | 5.3  | 6.6  |
| 440715 | 2.7  | 2.7  | 2.4  | 2.6  |
| 440803 | 2.9  | 1.7  | 3.2  | 2.4  |
| 441058 | 12.8 | 10   | 14   | 9.9  |
| 441195 | 5.5  | 3    | 5.6  | 3.3  |
| 441235 | 7.2  | 9.5  | 5.6  | 10.5 |
| 441344 | 6.8  | 2.7  | 6.2  | 2.4  |
| 441348 | 1.9  | 2.1  |      | 2.2  |
| 435824 | 23.2 | 18.7 | 19   | 17.9 |
| 435806 | 10.9 | 10.2 | 18.2 | 9.6  |
| 435803 | 11.5 | 7.9  | 10.5 | 10.6 |
| 435697 | 28.8 | 26.2 | 28.4 | 26.2 |
| 441082 | 14.8 | 11.3 | 15.6 | 13.3 |
| 435675 | 62.3 | 44.2 | 71.4 | 66.9 |
| 441088 | 3.2  | 5.6  | 6.8  | 2.9  |
| 435564 | 7.4  | 6.6  | 7.3  | 6.7  |
| 441102 | 16.5 | 13.3 | 16.5 | 12.3 |
| 441105 | 2    | 2.8  | 2.8  | 1.4  |
| 437189 | 13.4 | 14.1 | 14.9 | 15.5 |
| 439213 | 7.3  | 9.6  | 3.4  | 11.3 |
| 439145 | 2.3  | 1.7  | 3    | 2    |
| 439109 | 10.6 | 9.2  | 9.5  | 7.5  |
| 439019 | 8.5  | 6.3  | 9.5  | 8.2  |
| 438978 | 2.9  | 2.8  | 1.8  | 2.6  |
| 438963 | 19.2 | 19.6 | 20.6 | 18.4 |
| 438861 | 9.6  | 12   | 16   | 14.2 |
| 438825 | 3.3  | 6.8  | 5.9  | 10   |
| 438814 | 15.7 | 12.7 | 15.4 | 14.8 |
| 439272 | 2.6  | 3.4  | 2.4  | 5.5  |
| 439801 | 9.8  | 9.1  | 7.4  | 6.1  |
| 439800 | 2.6  | 2    |      |      |
| 439697 | 2.4  | 2.9  | 2.5  | 2.8  |
| 439597 | 3.2  | 2    | 3.1  | 2.4  |
| 439565 | 6.1  | 5.5  | 5.4  | 6.3  |
| 439511 | 1.8  | 1.8  | 1.5  | 2    |
| 439463 | 10.1 | 7.9  | 11.3 | 10.9 |
| 439413 |      |      | 1.6  |      |
| 439380 | 1.9  | 2.8  | 2.4  | 5.2  |
| 439352 | 6.9  | 9.9  | 7.6  | 8.9  |
| 440044 | 3.5  | 3    | 3.2  | 2.5  |
| 438737 | 2.8  | 2.4  | 3.3  | 5.2  |
| 438675 | 12.5 | 9.3  | 12.4 | 11.4 |
| 437927 | 29   | 21.1 | 24.5 | 24.6 |
| 437906 | 1.9  | 2.6  | 2.5  | 2.2  |
| 437823 | 21.9 | 16.7 | 20.9 | 18.9 |
| 437730 | 15.6 | 9.7  | 11.2 | 15.4 |
| 437550 | 13   | 11.4 | 17   | 14.9 |
| 437434 | 29.6 | 24.9 | 27   | 24.2 |
| 440340 | 10.8 | 8.9  | 9    | 9.3  |
| 437300 | 29.7 | 28.6 | 28   | 28.3 |
| 437291 | 5.8  | 3.4  | 5.9  | 2.9  |



|        |      |      |      |      |
|--------|------|------|------|------|
| 438070 | 12.8 | 13.6 | 10   | 10.3 |
| 438610 | 38   | 33.2 | 45.3 | 30.6 |
| 438574 | 3.1  | 2.2  | 2.1  | 2.9  |
| 438559 | 19   | 19.8 | 19.1 | 15.5 |
| 438473 | 8    | 8.7  | 8.5  | 6.5  |
| 438430 | 1.7  | 1.6  | 1.3  | 1.8  |
| 438418 | 12.1 | 11.7 | 14.3 | 12.5 |
| 438330 | 8.7  | 8    | 7.4  | 6.5  |
| 438290 | 3.1  | 1.8  | 2    | 2.6  |
| 438280 | 11.5 | 11.7 | 13.2 | 15.5 |
| 440169 | 6.8  | 5.6  | 6.8  | 5.3  |
| 440190 | 15.8 | 14.9 | 18.1 | 15.2 |
| 438211 | 6.8  | 4.9  | 6.9  | 8.9  |
|        |      |      |      |      |
| 438166 | 12.6 | 10.9 | 12   | 16.3 |
| 438690 | 6.8  | 2.7  | 2    | 5.3  |
| 442275 | 1.8  |      | 1.4  | 1.5  |
| 442403 | 2.8  | 2.4  | 2.5  | 2.3  |
| 442411 | 32.6 | 25.6 | 26.4 | 24.3 |
| 442240 | 1.5  |      | 2.7  |      |
| 432720 | 16   | 16.4 | 14.5 | 14.8 |
| 432621 | 58.8 | 49   | 58   | 61.8 |
| 432615 | 90.3 | 73.4 | 89   | 83.9 |
| 432537 | 7.6  | 12.2 | 16.1 | 12.5 |
| 442168 | 2.3  |      | 1.6  |      |
|        |      |      |      |      |
|        |      |      |      |      |
| 431434 | 43.5 | 28.7 | 17.3 | 14.7 |
| 431279 | 14.1 | 12.7 | 9.4  | 11.5 |
| 431882 | 78.1 | 56.4 | 44.1 | 61.1 |
| 431825 | 43.2 | 34.4 | 25.5 | 37.2 |
| 442557 | 2.8  | 1.8  | 2.4  | 2.8  |
| 442567 | 16.6 | 15.6 | 11   | 14.2 |
| 442127 | 2.7  | 1.6  | 1.9  | 1.7  |
| 441455 | 5.7  | 2.5  | 5.8  | 2.2  |
| 441460 | 7.3  | 6.5  | 3.3  | 6.5  |
| 441545 | 2.8  | 1.4  | 2.9  |      |
| 441551 | 2    |      | 2.1  |      |
| 441644 | 11.2 | 11.8 | 14.9 | 10.5 |
| 433207 | 34   | 18.9 | 21.8 | 13.8 |
| 441847 | 5.4  | 1.4  | 2.8  | 2.6  |
| 441887 | 2    | 2.1  |      | 2.2  |
| 433086 | 17.4 | 20.7 | 42.7 | 22.5 |
| 441962 | 8.4  | 3.4  | 7.1  | 7.3  |
| 442032 | 7    |      | 3.1  | 2.3  |
| 441674 | 7.4  | 2.7  | 6.5  | 2.2  |
| 433778 | 19.5 | 14.8 | 19.8 | 13.7 |
| 441722 | 2.3  | 1.9  | 2.7  | 2    |
| 441766 | 3.4  | 2.1  | 3    | 2.4  |
| 446926 | 84.6 | 70.6 | 93.3 | 77.9 |
| 405645 | 9.5  | 7.5  | 9.1  | 10.7 |
| 446955 |      |      | 1.7  |      |

|        |       |       |       |       |
|--------|-------|-------|-------|-------|
| 446905 | 25.2  | 18.9  | 28.3  | 25.5  |
| 446866 | 67.2  | 56.9  | 84.6  | 68.7  |
| 446868 | 21.3  | 19.6  | 28.4  | 22.5  |
| 446963 | 5.4   | 5.5   | 5.2   | 7.5   |
| 404774 | 41.2  | 32.2  | 40.2  | 34.3  |
| 404744 | 110.2 | 98.8  | 120.7 | 98.5  |
| 404941 | 19.6  | 13.2  | 14.1  | 12.7  |
| 404585 | 29.2  | 31.6  | 50.9  | 42.9  |
| 405522 | 76.7  | 63.4  | 67.9  | 66    |
| 405511 | 24.7  | 24.9  | 22.4  | 24    |
| 405385 | 26.1  | 18.3  | 24.8  | 19.9  |
| 405367 | 104.4 | 90.8  | 100.7 | 91.2  |
| 405345 | 79.9  | 47.8  | 48.6  | 48.8  |
| 408152 | 12.9  | 9.1   | 10.3  | 10.4  |
| 446685 | 7.9   | 2.9   | 5.8   | 6.2   |
| 446695 | 42.7  | 42.4  | 44.9  | 36.8  |
| 408878 | 5.5   | 3.2   | 2.1   | 1.9   |
| 408867 | 9.3   | 6.5   | 7.3   | 6.7   |
| 408864 | 31.6  | 27.1  | 34.2  | 27.4  |
| 408651 | 7.2   | 7.7   | 19.4  | 5.9   |
| 447994 | 29.4  | 16.4  | 20.3  | 16.2  |
| 407809 | 10.6  | 12.3  | 12.3  | 14.9  |
| 407807 | 7.7   | 7.4   | 3.5   | 6.1   |
| 448489 | 23    | 12.9  | 31.1  | 21.3  |
| 448489 | 23    | 12.9  | 31.1  | 21.3  |
| 400471 | 34.7  | 39.6  | 40.6  | 40.3  |
| 448521 | 18.7  | 10.7  | 22.9  | 14.5  |
| 448521 | 18.7  | 10.7  | 22.9  | 14.5  |
| 400367 | 17.2  | 15.2  | 16    | 14.2  |
| 448522 | 13.9  | 8.1   | 12.5  | 11    |
| 400309 | 26.1  | 33.4  | 28.4  | 35.2  |
| 400411 | 31.3  | 28.4  | 33.4  | 26.8  |
| 448489 | 23    | 12.9  | 31.1  | 21.3  |
| 400751 | 48    | 30.2  | 31    | 27    |
| 448488 | 41.1  | 17.2  | 45.5  | 28.6  |
| 448615 | 1.7   | 2     | 5.3   | 3     |
| 399502 | 41.3  | 28.4  | 33.8  | 28.9  |
| 399238 | 46.9  | 28.4  | 22.9  | 30    |
| 400052 | 43.1  | 29    | 37.8  | 33    |
| 399970 | 114.2 | 76    | 82.2  | 71.3  |
| 399940 | 171   | 118.5 | 151.2 | 119.9 |
| 448214 | 59.4  | 53.9  | 59    | 59.9  |
| 402837 | 28.8  | 21    | 26.3  | 20.6  |
| 448145 |       |       | 1.5   |       |
| 402733 | 30.6  | 20.4  | 29    | 22.5  |
| 402063 | 126.9 | 102.8 | 131.5 | 108.9 |
| 402179 | 38.4  | 25.7  | 33.4  | 29.3  |
| 401922 | 192.3 | 136.3 | 161.8 | 136.7 |
| 401848 | 16.5  | 13.1  | 11.8  | 15.3  |
| 401657 | 92.5  | 101.7 | 161.6 | 129.3 |
| 401560 | 33    | 21.8  | 15.1  | 23.4  |
| 402633 | 109.6 | 78.9  | 102.8 | 79.8  |

|        |       |       |       |       |
|--------|-------|-------|-------|-------|
| 402589 | 24.1  | 22.8  | 24.1  | 21.2  |
| 402475 | 34.7  | 28.4  | 31.9  | 27.4  |
| 402275 | 38    | 29.7  | 43    | 31.2  |
| 409000 | 27.5  | 23.5  | 28.5  | 19.5  |
| 409004 | 18.2  | 12.3  | 15.2  | 16.8  |
| 409016 | 1.3   |       |       | 1.4   |
| 446039 |       | 1.5   | 2.8   |       |
| 446008 | 1.8   | 2.9   | 2.7   | 2.6   |
| 446157 | 2.2   |       | 2.1   | 2     |
| 446172 | 3     | 2.5   | 3.4   | 5.4   |
| 446197 | 15.6  | 11.2  | 14.5  | 11.6  |
| 445995 | 10    | 8.9   | 8.4   | 9.9   |
| 445891 | 8.8   | 9     | 7.4   | 10.2  |
| 418961 | 6.8   | 5.3   | 7.5   | 5.7   |
| 446201 | 2.3   | 2.8   | 2.3   | 2.6   |
| 416023 |       | 1.7   | 2.3   |       |
| 422047 | 31.5  | 25.4  | 32.1  | 29.6  |
| 422041 | 35.6  | 27.2  | 27    | 27.3  |
| 422033 | 47.3  | 46.2  | 44.4  | 46.2  |
| 422022 | 22.9  | 25.1  | 22.4  | 25.8  |
| 421819 | 5.4   | 2.9   | 7.4   | 3.1   |
| 421744 | 5.4   | 2.7   | 6.4   | 3.2   |
| 445636 | 9.1   | 11.1  | 8.9   | 11.2  |
| 445647 | 9.5   | 8.9   | 12.3  | 10.6  |
| 419808 | 50.6  | 36.9  | 48.5  | 43.7  |
| 419797 | 53.9  | 41.6  | 53.6  | 39.4  |
| 419759 | 301.3 | 247.8 | 351.5 | 285.7 |
| 445806 | 23.3  | 31.7  | 29.8  | 35.5  |
| 445813 | 3.2   | 5.6   | 6.6   | 6     |
| 445839 | 14    | 15.5  | 19.2  | 14.3  |
| 421004 | 4.8   | 1.6   | 2     |       |
| 445703 | 17.5  | 19    | 15.1  | 20.6  |
| 420099 | 2.1   | 1.8   | 3     | 3.2   |
| 419995 | 25.5  | 20    | 25.2  | 19.1  |
| 419975 | 29.9  | 22.2  | 30.3  | 27.2  |
| 411503 | 32.7  | 22    | 28    | 27.2  |
| 411333 | 9.6   | 7.3   | 6.4   | 8.9   |
| 409689 | 70.1  | 59    | 58.2  | 46    |
| 409185 | 11.3  | 6.4   | 11.1  | 9.6   |
| 409093 |       | 1.7   |       |       |
| 409088 | 12.6  | 10.9  | 13.2  | 10    |
| 409735 | 99.2  | 74.3  | 105.6 | 105.7 |
| 409969 | 13.8  | 9.3   | 10    | 10    |
| 409872 | 17.5  | 11.8  | 10    | 9     |
| 414840 |       |       | 1.8   |       |
| 414303 | 8.3   | 7.9   | 9.1   | 7.3   |
| 413958 | 21.9  | 17.3  | 15.1  | 21.2  |
|        |       |       |       |       |
| 415796 | 1.4   |       |       |       |
| 446379 | 26.4  | 29.2  | 24.3  | 32.5  |
| 412714 | 19.5  | 18.3  | 25.5  | 18.2  |
| 412713 | 12.8  | 11.6  | 11.6  | 10    |

|        |      |      |      |      |
|--------|------|------|------|------|
| 439918 | 5.8  | 3.1  | 1.9  | 2.1  |
| 288062 | 35.8 | 32.7 | 40.3 | 32.5 |
| 474498 | 77   | 86.3 | 95.9 | 98.7 |
| 288640 | 9.2  | 10.7 | 11.1 | 9    |
| 466230 | 26.2 | 18.8 | 25.9 | 24.1 |
| 326480 | 1.6  | 2.2  | 1.5  | 2.3  |
| 287510 | 26.1 | 23.8 | 25   | 20.7 |
| 465762 | 25.7 | 19.5 | 19.4 | 27.3 |
| 326389 |      | 3.3  |      | 2.7  |
| 326371 | 1.6  | 2.4  |      | 5.9  |
| 326279 | 5.6  | 5.8  | 1.7  | 5.8  |
| 326263 | 2.2  | 2.8  | 4.5  | 7.4  |
| 287581 | 34.9 | 26.6 | 33.5 | 29   |
| 465643 | 5.9  | 9.9  | 8.9  | 8.2  |
| 465647 | 40   | 32.2 | 48   | 37.6 |
| 465747 | 12.9 | 6.7  | 10.3 | 10.8 |
| 326790 | 7.9  | 8.3  | 5.5  | 5.8  |
| 326737 | 1.8  | 2.8  | 2.1  | 1.6  |
| 465749 | 7.4  | 6.8  | 10.9 | 7.5  |
| 326728 | 7.6  | 2.5  | 5.4  | 6.5  |
| 326689 | 3.2  | 2.9  | 5.4  | 6.7  |
| 465753 | 17.9 | 14   | 13.5 | 14   |
| 326181 | 3    | 6.1  | 2.3  | 7    |
| 474605 | 31.3 | 24.1 | 29.7 | 36.1 |
| 465842 | 2.5  | 2.7  | 6.8  | 6.4  |
| 325845 | 5.4  | 3.1  | 5.1  | 11.8 |
| 287794 | 30.8 | 21.4 | 29.1 | 26   |
| 287825 | 62.2 | 43.5 | 54.2 | 40.7 |
| 325712 | 1.3  |      | 1.9  | 2    |
| 287926 | 24.4 | 20.4 | 26.7 | 27.1 |
| 325695 | 1.6  |      |      | 2.9  |
| 287947 | 38.1 | 23.5 | 29.7 | 25.6 |
| 287980 | 31.7 | 26.3 | 28.5 | 22.6 |
| 325866 | 8.3  | 9.9  | 8.6  | 13.5 |
| 325941 | 7.8  | 2.7  | 7.2  | 2.6  |
| 287601 | 42.8 | 30.7 | 37.5 | 28.3 |
| 326168 | 3.3  | 3.1  | 2.8  | 9.4  |
| 326080 | 2    | 2.8  | 1.6  | 5.7  |
| 326069 | 3.3  | 7.6  | 2.1  | 10.4 |
| 325989 | 5.6  | 7.1  | 5.9  | 13.7 |
| 287702 | 67.6 | 49.1 | 71.4 | 69.7 |
| 287708 | 51.5 | 40.6 | 44.4 | 36.7 |
| 325976 | 3.1  | 3.2  | 1.3  | 7.6  |
| 287730 | 47   | 31   | 39.9 | 31   |
| 287687 | 34   | 23.1 | 32.8 | 26.6 |
| 474179 | 30.7 | 30.6 | 78.1 | 41.8 |
| 467029 | 21.9 | 18.2 | 26.7 | 18   |
| 467030 | 9.9  | 9.5  | 7.6  | 8.7  |
| 474179 | 30.7 | 30.6 | 78.1 | 41.8 |
| 466869 | 7.8  | 6.3  | 9.7  | 6.4  |
| 321410 | 36   | 23.2 | 26   | 22.7 |
| 321406 | 27.4 | 21.5 | 24.8 | 21.2 |

|        |       |       |       |       |
|--------|-------|-------|-------|-------|
| 321267 | 79.1  | 71    | 81.5  | 66    |
| 321266 | 48.2  | 40.3  | 55.3  | 41.8  |
| 474084 | 58.1  | 55.3  | 68.8  | 57.2  |
| 474047 | 23.6  | 27.3  | 25.7  | 23.5  |
| 467176 | 8.4   | 8.8   | 12.6  | 7.8   |
| 474085 | 67.2  | 60.8  | 67.7  | 63.8  |
| 474146 | 9.1   | 7.5   | 12.8  | 10.9  |
| 474104 | 91.9  | 110.3 | 151.2 | 143.7 |
| 474404 | 14.5  | 18.4  | 20.3  | 19    |
| 474225 | 8.9   | 8.9   | 11.9  | 11.8  |
| 466784 | 3.3   | 8.3   | 11.9  | 7.1   |
| 466867 | 19.1  | 18.9  | 23.3  | 15.1  |
| 466751 |       |       | 8.1   | 2.1   |
| 474303 | 36.6  | 35    | 42.5  | 38.3  |
| 474275 | 18.5  | 15.5  | 19.9  | 18.1  |
| 474212 | 18.9  | 12.3  | 16.2  | 22.1  |
| 334829 | 177.9 | 150.6 | 147.6 | 180.7 |
| 284135 | 20.5  | 11.4  | 18    | 16.3  |
| 464145 | 12.6  | 12.4  | 13.5  | 13    |
| 463988 | 17    | 13.3  | 15.7  | 14.1  |
| 334943 | 152.7 | 149.1 | 138.2 | 148.2 |
| 334934 | 65.1  | 54.4  | 58.7  | 49.1  |
| 464747 | 5.9   | 3.3   | 5.7   | 5.5   |
| 464375 | 1.6   |       |       |       |
| 335198 | 163.9 | 149.3 | 118.2 | 115.4 |
| 463588 | 20.6  | 20.1  | 18.2  | 21.2  |
| 335940 | 172.4 | 166   | 174.4 | 186.1 |
| 474922 | 50    | 56    | 66.2  | 58.9  |
|        |       |       |       |       |
| 336210 | 141.9 | 107.2 | 139.4 | 127.9 |
| 336185 | 121.9 | 80.7  | 95.1  | 80.5  |
| 474918 | 193.2 | 201.5 | 231.2 | 213.2 |
| 335398 | 244.2 | 188.1 | 199.5 | 183.5 |
| 335392 | 56.2  | 45.2  | 40.9  | 41    |
| 335194 | 49.3  | 46    | 42.7  | 44.2  |
| 328146 | 2.8   | 3.3   | 3.3   |       |
| 328044 | 2.6   | 3.4   | 2.5   | 2.4   |
| 328152 | 2     | 1.7   | 2     |       |
| 474668 | 109   | 114   | 139.7 | 133.7 |
| 474672 | 5.5   | 5.5   | 7.1   | 3.4   |
| 465206 | 14.2  | 10.7  | 14.3  | 10.9  |
| 474782 | 138.1 | 150.3 | 219   | 184.8 |
| 464996 | 1.8   | 2.2   | 5.5   | 2.1   |
| 464917 | 5.8   | 7.7   | 6.4   | 7.4   |
| 284795 | 6.7   | 5.6   | 9.5   | 6.5   |
| 464927 | 78.9  | 79    | 100.6 | 91.8  |
| 464955 | 69.4  | 60.8  | 69.8  | 70.4  |
| 465057 | 1.4   | 2.2   |       |       |
| 285600 | 20.3  | 19.2  | 15.6  | 21.5  |
| 285600 | 20.3  | 19.2  | 15.6  | 21.5  |
| 474788 | 63.2  | 50.7  | 59.1  | 57.5  |
| 474789 | 49.1  | 49.5  | 68.3  | 60.2  |

|        |      |       |       |      |
|--------|------|-------|-------|------|
| 465089 | 17.9 | 19.9  | 21.4  | 19.6 |
| 303172 | 2.6  |       | 7.1   |      |
| 303178 |      |       | 2.6   |      |
| 303209 | 8    | 8     | 10    | 6.4  |
| 303213 | 22.3 | 16.2  | 20.7  | 14.9 |
|        |      |       |       |      |
|        |      |       |       |      |
| 301390 | 8.6  | 3.5   | 6.3   | 3.5  |
| 301445 | 11.3 | 10.7  | 12.3  | 6.9  |
| 301500 | 5.5  | 2.8   | 2.4   | 2.5  |
| 301557 | 1.7  |       |       |      |
| 313797 | 22.9 | 16.2  | 23.2  | 25.1 |
| 301384 | 25.2 | 18.5  | 21.7  | 18.4 |
| 469377 | 33.2 | 32.5  | 40.2  | 29.8 |
| 301324 | 26   | 19.2  | 29.2  | 23.1 |
| 300788 | 41.8 | 36.1  | 41.3  | 29.5 |
| 468499 | 9.2  | 8.5   | 7.7   | 8.2  |
| 300803 | 36.5 | 32.7  | 39.4  | 30.8 |
| 300879 | 30.8 | 23.4  | 31.4  | 26.6 |
| 300881 | 3.3  | 2.5   | 3.4   | 6    |
| 300883 | 55.9 | 40.2  | 64    | 53.2 |
| 300773 | 2    | 3     | 1.9   | 1.5  |
| 300758 | 22.4 | 13.8  | 24.5  | 15.7 |
| 300655 | 38.4 | 31.4  | 30.9  | 43.5 |
| 300665 | 26.1 | 22.2  | 23.5  | 30.7 |
| 300671 | 15.6 | 9.6   | 13.9  | 12.7 |
| 300687 | 21.5 | 19.9  | 23.5  | 16.3 |
| 300722 | 61.4 | 48.8  | 50    | 65.8 |
| 300723 | 12.8 | 5.8   | 13.1  | 9.9  |
| 300744 | 20.1 | 18    | 17.7  | 24.6 |
| 300891 | 22.9 | 16.1  | 22.1  | 16.1 |
| 301178 | 22.6 | 16.7  | 23.3  | 18.4 |
|        |      |       |       |      |
| 301246 | 27   | 20.5  | 29.4  | 22.9 |
| 301261 | 24.7 | 20.4  | 27.6  | 18.1 |
| 301312 | 12.4 | 8     | 11.2  | 8.3  |
| 314176 | 3    | 5.5   | 7.3   |      |
| 301159 | 33.5 | 25.7  | 40.4  | 30   |
|        |      |       |       |      |
| 301103 | 47   | 38.7  | 55.1  | 42   |
| 300908 | 84.6 | 62.5  | 71.8  | 48.1 |
|        |      |       |       |      |
| 300988 | 20.3 | 15.8  | 26.3  | 22.3 |
|        |      |       |       |      |
| 301012 | 33.3 | 23.3  | 33.1  | 26.4 |
| 314062 | 83.3 | 101.5 | 166.4 | 61.2 |
|        |      |       |       |      |
| 301086 | 23.7 | 14.7  | 27.6  | 14.5 |
|        |      |       |       |      |
| 301095 | 28.5 | 21.8  | 29.6  | 21.6 |
| 301100 | 2.7  | 5.9   | 2.6   | 6.7  |
| 314197 | 33.8 | 36.2  | 54.2  | 17.5 |

|        |       |       |       |       |
|--------|-------|-------|-------|-------|
| 310847 | 38.7  | 29.3  | 30.7  | 20    |
| 310730 | 22.5  | 17.4  | 20.7  | 15    |
| 309553 | 50.7  | 55.5  | 54    | 53.4  |
| 310727 | 87.2  | 61.9  | 71    | 71    |
| 470625 | 3.1   | 2     | 2.1   | 2.3   |
| 309221 | 61.9  | 70.2  | 77.7  | 81.7  |
| 470679 | 3.2   | 2.2   | 6.2   | 7     |
| 470630 |       | 1.5   | 1.4   | 2.7   |
| 309674 | 44.3  | 31.1  | 35.9  | 36    |
| 310615 | 152.5 | 132   | 161.1 | 127.4 |
| 310616 | 106.2 | 96.8  | 130.3 | 103.2 |
| 469437 | 18.5  | 15.9  | 21.2  | 19.5  |
| 307171 | 77    | 78.7  | 89.8  | 85.4  |
| 312374 | 8.4   | 6.2   | 8.6   | 5.6   |
| 312283 | 29.3  | 25.7  | 33.4  | 32.4  |
| 470883 |       |       | 2.2   | 3.3   |
| 470746 |       |       | 1.8   | 1.7   |
| 471102 | 8     | 6.4   | 10.8  | 9.5   |
| 469542 | 2.7   | 7.5   | 6.4   | 2.8   |
| 336250 | 157.4 | 136.1 | 140.5 | 154.2 |
| 300628 | 2.3   |       | 1.9   |       |
| 292970 | 76.7  | 49.9  | 64.9  | 52.6  |
| 293080 | 14.2  | 10.2  | 15.3  | 9.7   |
| 293086 | 22.2  | 16.8  | 23.2  | 14.2  |
| 317158 | 43.1  | 26.7  | 31.8  | 33.9  |
| 317157 | 53.6  | 25.4  | 32.8  | 38.5  |
| 292824 | 50.1  | 38    | 52.3  | 36.8  |
| 292832 | 77.4  | 56.2  | 67.7  | 55.6  |
| 467672 | 1.8   | 2     | 2.4   | 2.2   |
| 292965 | 50    | 36    | 50.8  | 40.4  |
| 293177 | 16.8  | 10.1  | 10.9  | 12.1  |
| 317121 | 75.2  | 53.3  | 52.5  | 52    |
| 317120 | 107.4 | 73.4  | 88.9  | 74.7  |
| 316748 | 20.9  | 18.8  | 12.3  | 14.4  |
| 316601 | 21.2  | 15.1  | 15    | 19.7  |
| 316882 | 12.5  | 11.5  | 7.9   | 15.8  |
| 316902 | 20.9  | 21.1  | 15    | 29.4  |
| 293180 | 33.3  | 21.1  | 23.1  | 18.5  |
| 293336 | 10.8  | 8.1   | 8.2   | 5.8   |
| 316985 | 12.4  | 14.9  | 16    | 16.1  |
| 316971 | 47.5  | 62.4  | 75.7  | 52.9  |
| 316954 | 20.6  | 25.5  | 32.3  | 23.7  |
| 467393 | 5.9   | 5.4   | 5     | 3     |
| 467469 | 3.4   | 2.6   | 7     | 3.1   |
| 291950 | 64    | 73.2  | 39.4  | 90.6  |
| 291961 | 50.8  | 53.6  | 31.3  | 72.3  |
| 467310 | 7.5   | 5.4   | 7.5   | 2.6   |
| 292661 | 8.9   | 5.7   | 10.5  | 3.2   |
| 292676 | 19.9  | 25.3  | 40.3  | 24.2  |
| 317503 | 16.7  | 11.4  | 10.4  | 11.2  |
| 473860 | 15    | 14.7  | 14.2  | 16.7  |
| 316482 | 26.9  | 22.1  | 20.8  | 22.3  |

|        |       |       |       |       |
|--------|-------|-------|-------|-------|
| 300446 | 48.3  | 40.9  | 43.5  | 57.5  |
| 300466 | 27.6  | 26.6  | 20.5  | 37.9  |
| 300562 | 31.5  | 34.1  | 24.8  | 39.5  |
| 300584 | 31.7  | 28.9  | 27.6  | 40    |
| 300404 | 5.6   | 3.3   | 2.8   | 5.5   |
| 300393 | 11.3  | 13.5  | 13    | 15.6  |
| 300271 | 2.7   | 2.4   | 3.1   | 2.6   |
| 300336 | 5.4   | 5.6   |       | 7.2   |
| 316188 | 48    | 36.7  | 48.6  | 54.1  |
| 295807 |       | 1.6   | 3     |       |
| 295907 | 13.6  | 8.1   | 14.8  | 6.2   |
| 316342 | 95.6  | 68.2  | 63.5  | 76.5  |
| 316319 | 28.5  | 21.9  | 18.6  | 24.9  |
| 316281 | 27.2  | 23.9  | 21.1  | 29.2  |
| 316320 | 23.9  | 14.9  | 17.3  | 22.8  |
| 316049 | 17.6  | 11.4  | 7.5   | 9.5   |
| 467964 | 5.2   |       | 2.5   | 3.3   |
| 265784 | 122.2 | 145.6 | 107.8 | 182.6 |
| 460317 | 14.7  | 15.2  | 32.2  | 11.8  |
| 460261 | 15.9  | 17.5  | 17.4  | 20.7  |
| 475478 | 39.5  | 26.4  | 35.5  | 28.4  |
| 265689 | 103.1 | 110.9 | 92.6  | 154.8 |
| 460321 | 6.7   | 2.4   | 10.8  | 6.8   |
| 265960 | 24.4  | 31.8  | 24.8  | 39.7  |
| 266011 | 175.1 | 191.8 | 157.8 | 267.3 |
| 265915 | 144.9 | 154.3 | 127.8 | 213.6 |
| 460379 | 67.5  | 54.4  | 66.3  | 58.2  |
| 343993 | 19.1  | 7     | 9     | 5.7   |
| 343990 | 22.6  | 11.2  | 7.7   | 9.9   |
| 264980 | 27    | 19.9  | 25    | 20.5  |
| 264980 | 27    | 19.9  | 25    | 20.5  |
| 265049 | 12.6  | 12.4  | 14.6  | 7.4   |
| 265049 | 12.6  | 12.4  | 14.6  | 7.4   |
| 265106 | 42.2  | 34.7  | 42.6  | 31.8  |
| 345204 | 126.6 | 108   | 117.8 | 105.6 |
| 460181 | 17.7  | 17.1  | 29.8  | 14.8  |
| 460183 | 10.5  | 7.6   | 17.6  | 6.8   |
| 265106 | 42.2  | 34.7  | 42.6  | 31.8  |
| 265173 | 16.7  | 12.4  | 15.7  | 7.5   |
| 265219 | 40.1  | 35.3  | 41.1  | 32    |
| 265219 | 40.1  | 35.3  | 41.1  | 32    |
| 265267 | 17.8  | 16.8  | 17.1  | 11.2  |
| 265267 | 17.8  | 16.8  | 17.1  | 11.2  |
| 251726 | 8.3   | 8.6   | 13.9  | 9.4   |
| 251866 | 69.7  | 56    | 77.3  | 60.5  |
| 460534 | 27.5  | 27.8  | 29.2  | 28.6  |
| 460626 | 5.3   | 3.4   | 2.6   | 1.8   |
| 460723 | 7.7   | 6.5   | 8.2   | 7     |
| 351000 | 15.2  | 9.6   | 16.8  | 13.3  |
| 351025 | 33.8  | 28.7  | 36    | 29.1  |
| 460524 | 33.1  | 24.1  | 27.1  | 26.4  |
| 460392 | 51.9  | 40.4  | 47.6  | 41.2  |



|        |       |       |       |       |
|--------|-------|-------|-------|-------|
| 266138 | 22.2  | 26.4  | 22.3  | 38.2  |
| 266202 | 88.7  | 91.9  | 73.2  | 123.7 |
| 460410 | 5.4   | 5.6   | 5.2   | 6.9   |
| 251941 | 10.5  | 6.5   | 9.9   | 9     |
| 251933 | 50.3  | 41.4  | 50.5  | 41.5  |
| 251873 | 7.2   | 8.1   | 10.4  | 7.2   |
| 264869 | 38.5  | 30.5  | 32.6  | 34.5  |
| 347850 | 7.4   | 7     | 7.4   | 7.1   |
| 258744 | 22.9  | 10.5  | 75.6  | 9.6   |
| 475404 | 117.8 | 100   | 84    | 118.9 |
| 347921 |       |       | 1.4   |       |
| 475406 | 21.4  | 20.5  | 21.8  | 17.6  |
| 258675 | 42.8  | 27.1  | 62.1  | 35.6  |
| 348024 | 8.2   | 6     | 10.5  | 7.1   |
| 258706 | 26.6  | 17.7  | 41.3  | 19.9  |
| 475399 | 96    | 94.7  | 102.9 | 95.7  |
| 475397 | 47.9  | 43.6  | 34.1  | 47.5  |
| 475390 | 58.5  | 58.2  | 58    | 62.8  |
| 258455 | 17.1  | 6.2   | 19.6  | 8.1   |
| 348635 | 9.1   | 3.2   | 6.5   | 12    |
| 348791 | 8.7   | 7.6   | 6.5   | 6.1   |
| 348342 | 9.3   | 11.7  | 12.7  | 12.1  |
| 348195 | 16.9  | 12.1  | 13.8  | 13.4  |
| 458820 | 26.2  | 22.5  | 15.3  | 18.2  |
| 348515 | 17.5  | 7.4   | 9.2   | 8.9   |
| 475409 | 6.9   | 5.1   | 2.6   | 2.7   |
| 459347 | 11    | 7.2   | 9.8   | 8.3   |
| 264153 | 51.1  | 40.3  | 52.5  | 38.1  |
| 345923 | 64.7  | 57    | 57.5  | 61    |
| 475466 | 2.9   | 2.1   | 4.6   | 2.7   |
| 459896 | 12.6  | 11.1  | 13.4  | 9.1   |
| 475457 | 10.6  | 11.3  | 11.6  | 14.2  |
| 264061 | 60.2  | 45.8  | 52.4  | 51.3  |
| 345499 | 46.8  | 37.8  | 46.5  | 40.4  |
| 264869 | 38.5  | 30.5  | 32.6  | 34.5  |
| 345352 | 63.8  | 52.8  | 59    | 59.5  |
| 458414 | 7.2   | 7.2   | 5.7   | 6.9   |
| 345643 | 36.7  | 33.6  | 34.7  | 31.8  |
| 459497 | 24.8  | 19.2  | 23.8  | 22.6  |
| 459665 | 10.9  | 5.6   | 9.3   | 6     |
| 459683 | 16.2  | 14.5  | 13.9  | 14.2  |
| 346656 | 129.7 | 88.5  | 114.9 | 98.1  |
| 475296 | 103.2 | 131.5 | 144   | 184.9 |
| 475293 | 11.1  | 15.7  | 13.5  | 16.3  |
| 475551 | 2.9   | 2.6   | 2.9   | 2.9   |
| 273316 | 3.3   |       | 1.9   | 2.7   |
| 352231 | 20.1  | 12.6  | 12    | 15.4  |
| 342388 | 15.2  | 11.1  | 10.9  | 13.6  |
| 337284 | 56.8  | 49.3  | 49.5  | 49.2  |
| 462338 | 6.7   | 3.1   | 11.8  | 6     |
| 462896 | 11.8  | 8.9   | 11.8  | 12    |
| 461732 | 62    | 45.2  | 50.1  | 38.9  |

|        |       |       |       |       |
|--------|-------|-------|-------|-------|
| 336943 | 111.6 | 82.5  | 70.8  | 72.3  |
| 340053 | 61.1  | 54.6  | 56.1  | 58.3  |
| 351594 | 18    | 13.1  | 17    | 11.7  |
| 351542 | 6.1   | 6.7   | 6.2   | 5.3   |
| 475010 | 52.3  | 52.7  | 74.9  | 60.4  |
| 352237 | 7.1   | 3     | 6.4   | 6.2   |
| 277313 | 34.8  | 25.2  | 36.7  | 29.9  |
|        |       |       |       |       |
| 337928 | 140.1 | 88.3  | 87.7  | 75.2  |
| 277548 | 4.9   | 1.8   | 5.5   | 2     |
| 462627 | 33.4  | 25    | 33.3  | 33.5  |
| 277282 | 57.6  | 48.8  | 64.3  | 53.6  |
| 277573 | 20.9  | 11.7  | 19.5  | 14.2  |
|        |       |       |       |       |
| 277234 | 68.3  | 49.1  | 61.6  | 44.8  |
| 277232 | 29.8  | 27.5  | 37.8  | 28.1  |
|        |       |       |       |       |
| 277599 | 6.9   | 5.6   | 5.7   | 3.1   |
| 277632 | 10.7  | 9.2   | 9.3   | 6.7   |
| 277673 | 2.9   | 2.5   | 5     | 2.9   |
| 277714 | 1.5   |       | 2.4   |       |
| 277218 | 33.8  | 26.1  | 37.8  | 28.3  |
| 277509 | 15    | 10    | 13.2  | 11.6  |
| 277491 | 30.1  | 23.8  | 30.7  | 21    |
| 462650 | 23.9  | 22.4  | 18.2  | 20.7  |
| 475013 | 19    | 19.9  | 25.8  | 22    |
| 277471 | 30.5  | 20.6  | 35.9  | 26.6  |
| 457889 | 10.7  | 9.6   | 11.9  | 13    |
| 277445 | 27.9  | 23.2  | 25.9  | 15.5  |
| 277430 | 31.6  | 25    | 37.6  | 23.6  |
| 337834 | 143.8 | 144   | 187.2 | 140.5 |
| 277407 | 2.1   |       | 1.4   |       |
| 277524 | 28.3  | 20.5  | 30.5  | 21.6  |
| 277392 | 30    | 21.8  | 27.1  | 22.2  |
| 277532 | 10.2  | 6.3   | 7.1   | 5.7   |
|        |       |       |       |       |
| 277188 | 38.4  | 28.4  | 50.5  | 35.4  |
| 338075 | 26.2  | 23.8  | 25.5  | 24    |
| 278623 | 1.5   |       | 5.5   |       |
| 352146 | 173.7 | 135.4 | 29    | 24.1  |
| 276882 | 7.3   | 8.2   | 7.8   | 6.5   |
| 462512 | 18.6  | 13.4  | 12    | 13    |
| 276844 | 15.5  | 8     | 10.7  | 9.8   |
| 276761 | 4.6   | 1.9   | 2.9   | 2.4   |
| 462479 | 30.7  | 24.5  | 35.7  | 26    |
| 462787 | 10.8  | 11    | 9.3   | 9.7   |
| 462471 | 61.5  | 49.1  | 70.8  | 50.8  |
| 351772 | 14.3  | 14.6  | 13.5  | 10.8  |
| 278704 | 6.6   | 1.7   | 14.7  |       |
| 278621 | 3.1   |       | 14    |       |
|        |       |       |       |       |
| 277160 | 31.2  | 21.1  | 30.3  | 17.3  |

|        |       |       |       |       |
|--------|-------|-------|-------|-------|
|        |       |       |       |       |
| 277148 | 43.7  | 26.1  | 39    | 31.4  |
|        |       |       |       |       |
| 338247 | 135.1 | 116.4 | 152.1 | 143   |
| 277112 | 35.4  | 26.6  | 26.6  | 18    |
| 352105 | 27.8  | 28.5  | 25    | 25    |
| 277095 | 32.6  | 25.2  | 39.5  | 27.6  |
| 277070 | 25.3  | 20.6  | 28.5  | 21.6  |
| 277056 | 23.8  | 16.8  | 24.4  | 18.4  |
| 277043 | 6.7   | 2.7   | 8.5   | 3.5   |
| 276915 | 8.4   | 7     | 8.4   | 6.5   |
| 463241 | 7.1   | 5.8   | 6.4   | 7.9   |
| 461074 | 54.2  | 43.2  | 56.2  | 44.2  |
| 351194 | 22.4  | 19.5  | 27.5  | 16.9  |
| 461061 | 47    | 38.5  | 44.8  | 41.6  |
| 336615 | 46.4  | 31.3  | 36.7  | 30.2  |
| 461196 | 12.2  | 8.9   | 11.1  | 7.4   |
| 461183 | 24.8  | 19.5  | 19.4  | 18.9  |
| 461076 | 2.2   | 2.5   |       |       |
| 463225 | 6.4   | 6     | 2.7   | 6.6   |
| 268112 | 73.3  | 49.4  | 80.2  | 55.2  |
| 268050 | 48.9  | 38.2  | 52.7  | 37.9  |
| 268036 | 86.9  | 63    | 99.4  | 69.8  |
| 460908 | 17.9  | 17.7  | 23.1  | 16.6  |
| 460897 | 12.9  | 10.3  | 8.8   | 9.3   |
| 268126 | 49.3  | 34.3  | 50.1  | 41.8  |
| 267952 | 14.3  | 13.7  | 18.2  | 13.2  |
|        |       |       |       |       |
| 342195 | 109.9 | 89.4  | 98.8  | 98.7  |
| 463385 | 2.8   | 3.1   | 2.5   | 7.2   |
| 460958 | 14.4  | 10.9  | 12.3  | 12.8  |
| 336398 | 54.9  | 47.4  | 43.5  | 34.6  |
| 351166 | 17.7  | 11.8  | 22.2  | 14.3  |
| 463402 | 9.7   | 6.4   | 6.6   | 8.9   |
| 475039 | 103.3 | 74.4  | 99.4  | 91.3  |
| 336861 | 120.7 | 84.1  | 74.2  | 67.8  |
| 352270 | 54.4  | 38.9  | 38.1  | 34.4  |
| 351457 | 17    | 10.1  | 16.8  | 17.7  |
| 463089 | 20.6  | 24.1  | 23.7  | 29.9  |
| 351342 | 9.3   | 6.9   | 11.1  | 11    |
| 458111 | 21.3  | 16.3  | 16.9  | 20.1  |
| 336636 | 17.9  | 13.6  | 16    | 16.4  |
| 351316 | 7.7   | 7.3   | 11    | 8.5   |
|        |       |       |       |       |
| 336524 | 154.7 | 98.9  | 129.8 | 106.9 |
| 425379 | 154.2 | 169.6 | 227.3 | 229.4 |
| 462753 | 11.5  | 6.5   | 7.4   | 9.7   |
| 437319 | 10.2  | 8     | 9.8   | 7.8   |
| 410021 | 15.8  | 7.6   | 10.4  | 11.3  |
| 378240 | 61.1  | 76.1  | 108.6 | 86.8  |
| 457866 | 127.3 | 109   | 132.2 | 115.2 |
| 425556 | 8     | 5.8   | 10.4  | 7.6   |

|        |       |       |       |       |
|--------|-------|-------|-------|-------|
| 439162 | 7.7   | 5.3   | 5.6   | 5.4   |
| 344260 | 46.5  | 34.5  | 44    | 48.5  |
| 401787 | 173.4 | 127   | 163.9 | 140.6 |
| 460653 | 9.6   | 8.6   | 9.3   | 5.7   |
| 401268 | 27.6  | 19.9  | 24    | 23.6  |
| 386436 | 5.3   | 1.8   | 1.7   | 4.8   |
| 455459 | 30    | 24.6  | 33.4  | 28.7  |
| 389567 |       |       | 2.8   |       |
| 311800 | 164.1 | 209.8 | 117.7 | 265.7 |
|        |       |       |       |       |
| 397035 | 37.3  | 38.7  | 36.4  | 42.4  |
| 441461 | 2     | 1.8   | 2.2   | 1.7   |
| 376700 | 7.9   | 9.9   | 10.7  | 7     |
| 353480 | 23.3  | 14.7  | 21.5  | 12.7  |
| 448774 | 10.1  | 8.1   | 12.6  | 11.2  |
| 309536 | 131.7 | 132.6 | 132.2 | 129.4 |
| 463488 | 42.7  | 37.1  | 38.8  | 45.4  |
| 291594 | 3.1   | 5.9   | 6.2   | 5.5   |
| 465148 | 3.1   | 1.8   | 2.9   | 5.1   |
| 320382 | 6.1   | 6.9   | 8.5   | 6     |
| 266123 | 118.2 | 131.9 | 98.2  | 167.3 |
| 374998 | 19.6  | 16.5  | 20.1  | 17.2  |
| 376829 | 31.5  | 22.5  | 28.8  | 21.6  |
| 443265 | 2.7   | 1.6   | 1.4   | 1.8   |
| 431403 | 32.5  | 34.1  | 40.2  | 35.6  |
| 300481 | 8     | 3.2   | 3.1   | 8.6   |
| 380383 | 1.8   | 3.4   | 2     | 3.4   |
| 459480 | 3.1   | 2.5   | 4.7   | 1.5   |
| 409858 | 5     | 2.6   | 2.8   | 2.6   |
| 449654 | 71    | 59.9  | 64.1  | 83.2  |
| 393859 | 5.4   | 6.7   | 6.6   | 8     |
| 378119 | 29.5  | 24.4  | 28.8  | 28.5  |
| 376791 | 91.3  | 69.1  | 103.1 | 71    |
| 395789 | 32.8  | 27.7  | 29.7  | 44.7  |
| 378310 | 114.5 | 90.8  | 101.2 | 83.4  |
| 401915 | 15.8  | 12.9  | 10.2  | 10.9  |
| 258456 | 14    | 11.1  | 17.1  | 9.4   |
| 467814 | 6.8   | 5.5   | 7.1   | 6.2   |
| 453484 | 9.9   | 7.1   | 9     | 9.1   |
| 313934 | 66.2  | 33.6  | 31.3  | 38.9  |
| 439625 | 5     | 3.1   | 5.1   | 3.6   |
| 444413 | 2.6   | 2.2   | 3     | 1.9   |
| 423804 | 35.8  | 40.6  | 37.5  | 41.4  |
| 445476 | 29    | 31.2  | 37.3  | 33.4  |
| 413041 | 14.5  | 8.9   | 16.5  | 6.9   |
| 414187 | 18.8  | 14.2  | 18.4  | 19.1  |
| 471269 |       |       |       | 1.7   |
| 435556 | 2.5   |       | 2.6   | 2.8   |
| 440359 | 2     |       | 2.6   | 2.3   |
| 437305 | 8.2   | 5.9   | 6.7   | 5.7   |
| 300602 | 6.1   | 4.9   | 5.3   | 7.9   |
| 440202 | 7.9   | 2.5   | 5.9   | 2.7   |

|        |       |       |       |       |
|--------|-------|-------|-------|-------|
| 409740 | 58.2  | 41.1  | 43.1  | 35    |
| 443006 |       | 1.9   |       | 1.3   |
| 429969 | 37.7  | 24.4  | 35.1  | 33.2  |
|        |       |       |       |       |
| 326884 | 6     | 2.7   | 5.7   | 8.2   |
| 326593 |       |       | 1.5   | 3.2   |
| 351477 | 5.8   | 2.1   | 7     | 6.7   |
| 370397 | 70    | 60.9  | 77.3  | 77.4  |
| 463743 | 5.8   | 7.5   | 8.6   | 9.9   |
| 356021 | 1.5   |       |       |       |
| 311580 | 20.8  | 19.9  | 18    | 20.3  |
| 458787 | 47.5  | 49.8  | 30.1  | 48.7  |
| 467815 | 2.9   | 2     | 2.7   | 2.3   |
| 461737 | 102.9 | 72.7  | 76.4  | 59.3  |
| 362873 | 1.8   | 1.7   | 2.5   | 1.5   |
| 360702 | 2     | 1.6   | 2     |       |
| 374382 | 25    | 17.9  | 25    | 20.3  |
|        |       |       |       |       |
| 431828 | 81.8  | 63.3  | 75.2  | 65.9  |
| 408882 | 7.6   | 6.1   | 12.9  | 6.7   |
| 292410 | 22.6  | 19.1  | 21.4  | 16.9  |
| 397902 | 5.4   | 2.7   | 5.1   | 5     |
| 383780 | 2.9   | 3.3   | 6.2   | 2.4   |
| 328256 |       |       | 2.9   | 2.6   |
| 394024 | 60.1  | 56.6  | 52.1  | 56    |
| 278626 |       |       | 1.5   |       |
| 404565 | 53.2  | 59.7  | 98.7  | 76    |
| 376637 | 30    | 20.6  | 30.9  | 24.4  |
| 355098 | 16.9  | 12.3  | 14.1  | 9.6   |
|        |       |       |       |       |
| 367363 | 2.2   | 1.8   | 1.2   |       |
|        |       |       |       |       |
| 345199 | 21.8  | 10.9  | 10.2  | 12.5  |
| 419090 |       |       |       | 1.8   |
| 427717 | 85.9  | 101.5 | 130.7 | 117.6 |
| 300206 | 6.5   |       |       | 3.1   |
| 397306 | 49.6  | 37.2  | 57.9  | 40.5  |
| 459785 | 6.5   | 2.7   | 1.7   | 2.3   |
| 436034 | 4.9   | 2.9   | 1.6   | 2.6   |
| 346718 | 14.6  | 10.5  | 13.2  | 11.2  |
| 346057 | 60.4  | 56.9  | 65.3  | 64.5  |
| 455280 | 22    | 15.9  | 18.1  | 12.2  |
| 423919 | 30    | 31.9  | 23.8  | 38.4  |
| 426231 | 43.7  | 31.7  | 36.3  | 31.5  |
| 423803 | 12    | 8.8   | 10.9  | 14.7  |
| 465047 | 7.1   | 8     | 6.9   | 9.1   |
| 308421 | 24.1  | 27.6  | 46.7  | 14.8  |
| 335413 | 16.1  | 12.4  | 9.1   | 15.4  |
|        |       |       |       |       |
| 385136 | 3     |       | 2.8   | 2.3   |
| 404904 | 31.6  | 24.8  | 32.6  | 25.1  |
| 285997 | 92.1  | 92.8  | 71.9  | 105.1 |

|        |       |       |       |       |
|--------|-------|-------|-------|-------|
| 424407 | 253.2 | 198.1 | 222.7 | 181.6 |
| 431758 | 32    | 23.5  | 25.6  | 19.7  |
| 326472 | 3.2   | 2     |       | 1.5   |
| 336200 | 358   | 265.8 | 291.6 | 278.1 |
| 428331 | 23.5  | 23.7  | 28    | 23.3  |
| 461668 | 44    | 29.1  | 28.8  | 30.3  |
| 288441 | 146.1 | 158.2 | 83    | 212.8 |
| 454017 | 15.3  | 17    | 21.4  | 22    |
| 378333 | 118.3 | 87.5  | 113.9 | 98.5  |
| 441065 | 5     | 1.7   | 2.8   | 2.7   |
| 444305 |       |       | 1.3   |       |
| 374306 | 44.5  | 31.3  | 43.9  | 36.3  |
| 462309 | 11.3  | 5.7   | 8.3   | 7     |
| 462317 | 6.4   | 5.2   | 6.6   | 5.8   |
| 292515 | 2.1   | 1.8   | 2.4   | 2.1   |
| 404908 | 19.4  | 20.2  | 18.3  | 16.1  |
| 401715 | 8.9   | 7.9   | 10.6  | 12.1  |
| 408748 | 7.4   | 5.4   | 11.7  | 5.5   |
| 439834 |       | 1.4   | 1.7   |       |
| 300695 | 8.1   | 7.4   | 9.5   | 6.8   |
| 356386 | 2.8   | 1.4   | 7.2   |       |
| 358099 | 7     | 5.7   | 8.7   | 7.1   |
| 371199 | 24    | 20.5  | 17    | 17.5  |
| 465159 | 7.1   | 3.2   | 5.5   | 5.1   |
| 400573 | 27.6  | 31    | 43.8  | 35.1  |
| 284913 | 23.9  | 22.3  | 34.3  | 23.3  |
| 286480 | 9.1   | 8.5   | 8     | 8.1   |
| 288886 | 124.9 | 90.6  | 123.4 | 103.8 |
| 369978 | 220.9 | 187.9 | 219.2 | 226.6 |
| 399857 | 65.9  | 49.9  | 51.5  | 45.4  |
| 465884 | 10.1  | 7.8   | 15.2  | 13.9  |
| 310905 | 48.2  | 37.3  | 43.5  | 39.3  |
| 461573 | 13.5  | 19.1  | 22.8  | 16.8  |
| 402962 | 24.5  | 18.8  | 25.7  | 17.6  |
| 402736 | 23    | 16.1  | 18.8  | 16    |
| 444644 | 2.8   | 2     | 2.9   | 2.2   |
| 307247 | 28.3  | 23.7  | 26    | 28.5  |
| 355728 | 18.9  | 9.4   | 11.9  | 11    |
| 401652 | 6.9   | 7.1   | 11.2  | 7.8   |
| 448328 | 28.1  | 34    | 43.2  | 44.6  |
| 373554 | 27    | 24.1  | 20.1  | 23    |
| 335402 | 458   | 454.4 | 387.2 | 544.2 |
| 449393 | 10.8  | 6.2   | 11.8  | 11.1  |
| 365746 | 1.3   |       | 1.8   |       |
| 362129 | 3.2   | 5.7   | 5.9   | 6.5   |
| 446242 | 2.1   |       |       |       |
|        |       |       |       |       |
| 434991 | 3.1   | 2.1   | 6.9   | 3     |
| 363048 | 2.2   | 1.9   |       |       |
| 414100 | 53.6  | 43.1  | 53.7  | 51    |
| 434991 | 3.1   | 2.1   | 6.9   | 3     |
| 408956 | 12.5  | 10.1  | 13.4  | 12.9  |

|        |       |       |       |       |
|--------|-------|-------|-------|-------|
| 394881 | 216.5 | 194.2 | 247   | 221.1 |
| 362780 |       | 1.3   | 2.5   | 1.4   |
| 425509 | 6.1   | 6.6   | 13.2  | 10.8  |
| 400945 | 20.4  | 14.3  | 16.8  | 14.9  |
| 307156 | 61.6  | 62.2  | 69.8  | 78.3  |
| 335025 | 316.7 | 248.2 | 280.1 | 285   |
| 395942 | 18.2  | 23.5  | 20    | 27.9  |
| 443243 |       |       | 1.4   |       |
| 429854 | 46    | 35.2  | 24.4  | 32.8  |
| 452735 | 13.7  | 10.2  | 9.4   | 13.2  |
| 355613 | 17.4  | 13.7  | 16.8  | 14    |
| 404625 | 28.4  | 28.1  | 31.8  | 35.4  |
| 404726 | 83.2  | 45.3  | 50.5  | 44.5  |
| 378334 | 81    | 61    | 75.9  | 62.6  |
| 311113 | 41.5  | 37.3  | 43.6  | 40.9  |
| 377369 | 22.2  | 20    | 15.9  | 18.4  |
| 402639 | 136.3 | 98.7  | 118.7 | 93    |
|        |       |       |       |       |
| 338032 | 49.9  | 46    | 50.9  | 51.7  |
| 429952 | 24.9  | 29.2  | 32.8  | 27.5  |
| 444561 |       | 1.6   |       |       |
| 453180 | 2.1   | 2.5   | 5.7   |       |
| 336206 | 34.2  | 24.9  | 27.8  | 24.5  |
| 448374 | 8.1   | 6.9   | 10.9  | 6.6   |
| 414036 | 10.3  | 10.1  | 14    | 10.4  |
| 250690 |       | 1.9   |       | 1.7   |
| 426640 | 36    | 24.5  | 22    | 29.8  |
| 373178 | 18.7  | 19.2  | 19.1  | 19.9  |
| 461085 | 26.8  | 27.9  | 24.9  | 25.4  |
| 461863 | 9.4   | 10.7  | 9.3   | 7.6   |
| 309653 | 189.7 | 186.9 | 182.2 | 176.5 |
| 420782 | 17.6  | 15.5  | 19.1  | 15.7  |
| 443381 | 1.6   |       |       |       |
| 385805 | 1.8   | 1.9   |       |       |
| 343602 | 41.5  | 33    | 33.3  | 30.6  |
| 286380 | 13.5  | 8.7   | 11    | 9.8   |
| 266323 | 62.7  | 55.3  | 57.4  | 68.9  |
| 360394 | 2.7   | 1.6   |       |       |
| 429371 | 12.8  | 7.4   | 10.4  | 8.6   |
| 446219 | 3     | 5.9   | 2.4   | 2.2   |
| 417771 |       |       |       | 1.4   |
| 400085 | 22.6  | 15.8  | 15.1  | 23.7  |
| 415881 | 7.7   | 2.4   | 5.9   | 8     |
| 312843 | 243.5 | 142.3 | 178.5 | 161.1 |
| 332603 | 2     | 1.4   | 1.4   |       |
| 452075 | 23.1  | 20.7  | 25.7  | 18.3  |
| 328378 | 1.4   | 1.3   | 1.4   | 2.1   |
| 439699 | 5.9   | 2.6   | 5.1   | 2.6   |
| 375488 | 6.9   | 1.6   | 2.6   | 5.8   |
| 394882 | 242.1 | 203.2 | 230.1 | 210.3 |
| 396731 | 9.8   | 6.8   | 10.9  | 8.2   |
| 263423 | 36.1  | 30.9  | 40.1  | 31.4  |

|        |       |       |       |       |
|--------|-------|-------|-------|-------|
| 450350 | 6.8   | 2.1   | 2.9   | 2.7   |
| 433688 | 10.2  | 9.5   | 9.6   | 9.7   |
| 348053 | 2.3   | 1.9   |       |       |
| 465021 | 61.7  | 47.7  | 57.8  | 51    |
| 409025 | 1.4   |       | 5.1   | 1.8   |
| 460912 | 10.8  | 11.4  | 5.8   | 9.9   |
| 397826 | 12.3  | 9.9   | 9.8   | 9.2   |
| 288033 | 21.7  | 14    | 17.8  | 18    |
| 411563 | 2.4   | 1.7   | 1.4   |       |
| 288316 | 25.4  | 47.1  | 33.4  | 69.7  |
| 437811 |       | 1.5   | 1.5   |       |
| 442682 | 3.3   | 3.2   | 3.4   | 2.6   |
| 314109 | 86.7  | 48.5  | 45.6  | 98.8  |
| 431691 | 253.1 | 141.8 | 163.7 | 142.3 |
| 311184 | 42.6  | 27.4  | 33.7  | 28.3  |
| 309452 | 50    | 43.8  | 45.4  | 43.8  |
| 364289 |       | 1.6   |       |       |
| 425304 | 26.3  | 15    | 20    | 20.8  |
| 401080 | 62.5  | 48.8  | 60.4  | 53.7  |
| 364395 |       | 1.4   |       |       |
| 455577 | 17.9  | 11.3  | 15.6  | 19.2  |
| 467177 |       |       | 1.7   | 1.4   |
|        |       |       |       |       |
| 464841 | 42    | 28.5  | 38.3  | 32.2  |
| 383744 | 1.4   | 1.7   | 1.7   | 2.8   |
| 452608 | 31.2  | 25.3  | 29.8  | 32.6  |
| 336424 | 122   | 102.8 | 117.5 | 117.8 |
| 452828 | 23    | 14.1  | 17.7  | 15.3  |
| 396681 | 29.3  | 24.1  | 32.2  | 36.4  |
| 310811 | 111   | 88.5  | 124.1 | 99.4  |
| 346370 | 23.9  | 22.7  | 29.9  | 28.3  |
|        |       |       |       |       |
| 399385 | 29.2  | 23.7  | 37.4  | 22.6  |
| 430742 | 37.5  | 23    | 26.7  | 26.8  |
| 305992 | 50    | 47.7  | 52.2  | 50.1  |
| 456171 | 12.8  | 10.9  | 10.4  | 12.7  |
| 452872 | 20.3  | 18.7  | 17.9  | 19.9  |
| 343537 | 15.8  | 17.3  | 16.1  | 19.3  |
| 287496 | 189.7 | 166.7 | 188.3 | 219.7 |
| 327889 | 5.5   | 1.5   | 6.3   | 2.9   |
| 311513 | 35.6  | 28    | 30    | 28.6  |
| 402832 | 12    | 7.8   | 8.9   | 10.2  |
| 346798 | 15.4  | 14.3  | 17.9  | 9.8   |
| 397371 | 73.7  | 44.7  | 53    | 37.8  |
| 362218 | 2.1   | 2.1   | 2     | 2.7   |
| 436352 | 8.2   | 3.3   | 6.3   | 6.9   |
| 301376 | 3.1   | 5.4   | 6.9   | 6.2   |
|        |       |       |       |       |
| 451134 | 10.4  | 7     | 8.6   | 17.6  |
| 433710 | 3.5   | 2.4   | 3.2   | 2.7   |
| 291710 | 31.1  | 27.1  | 46.4  | 29.6  |
| 310182 | 44.2  | 29.4  | 34.7  | 33.4  |



|        |       |       |       |       |
|--------|-------|-------|-------|-------|
| 374228 | 79.5  | 57    | 69.9  | 59.2  |
| 310492 | 93.4  | 79.7  | 83.3  | 100.4 |
| 311355 | 9.1   | 9     | 9.6   | 8.9   |
| 423824 | 20.8  | 21.1  | 18.7  | 20.7  |
| 373916 | 36.5  | 39.5  | 52.4  | 45.5  |
| 309438 | 265.3 | 250.3 | 292.5 | 287.6 |
| 444809 | 2.7   | 2     | 2.7   | 1.4   |
| 424446 | 181.3 | 144.1 | 164.6 | 128   |
| 452156 | 45.4  | 41.4  | 46.7  | 47    |
| 251735 | 6.6   | 2.4   | 6.9   | 5.4   |
| 428834 | 75.9  | 54.8  | 74.5  | 67.6  |
| 340467 | 39.9  | 35.1  | 41.3  | 41.1  |
| 291842 | 6.6   | 8.8   | 8     | 10.3  |
| 453581 | 26.9  | 22.7  | 27.4  | 25    |
| 371480 | 60.7  | 43.2  | 54    | 49.1  |
| 426188 | 3.3   | 2.6   | 2.7   | 3.2   |
| 426830 | 28.6  | 21.3  | 24.7  | 28.3  |
| 379225 | 47.3  | 33.7  | 45.7  | 27.1  |
| 300532 | 1.7   | 1.2   | 2.3   | 2     |
| 410017 | 1.7   | 3.3   | 5.7   | 5     |
| 435975 |       | 1.6   | 2.1   | 5.2   |
| 395118 | 45.1  | 38.6  | 43.2  | 39.9  |
| 448180 | 11.6  | 11    | 12.6  | 12.1  |
| 421211 | 20.7  | 19    | 18.2  | 21.6  |
| 382719 | 37.9  | 23    | 30.3  | 26.1  |
| 448458 | 10.5  | 9.9   | 10.3  | 7.6   |
| 448463 | 7.4   | 6.4   | 7.3   | 11.3  |
| 448181 | 8.7   | 7.1   | 9.9   | 8.4   |
| 263540 | 29.9  | 23.9  | 33.8  | 28.6  |
| 404729 | 87.5  | 45.7  | 48    | 41.9  |
| 317327 | 10.1  | 8.5   | 10.3  | 7.8   |
| 355845 |       | 1.7   | 1.6   |       |
| 429212 | 30.2  | 27.5  | 30.2  | 30.4  |
| 424489 | 107.7 | 89    | 101.7 | 82.6  |
| 310579 | 52.6  | 68.5  | 101   | 80.6  |
| 448588 | 13.5  | 14.2  | 19.9  | 11.8  |
|        |       |       |       |       |
| 400611 | 13.3  | 11.4  | 10.6  | 9.7   |
| 404235 | 12.6  | 6.8   | 11.7  | 8.8   |
| 358736 | 2.3   | 1.9   | 3.2   |       |
| 307431 | 27.3  | 25.2  | 25    | 24.1  |
| 439314 | 1.8   | 1.8   | 1.9   |       |
| 382821 | 44.1  | 29.3  | 28.8  | 34.7  |
| 432572 | 55.5  | 39.9  | 49.4  | 52.4  |
| 452000 | 19.2  | 17.5  | 15.9  | 16.6  |
| 465229 | 2.9   | 1.7   | 7     | 2.9   |
| 370371 | 37.7  | 33    | 38.3  | 41.1  |
| 378340 | 13.9  | 10.4  | 9.8   | 10    |
| 379677 | 12.6  | 8.1   | 8.9   | 10.7  |
|        |       |       |       |       |
| 343845 | 9.5   | 8.8   | 8.1   | 8.7   |
| 459529 | 21.9  | 15.5  | 21.3  | 15.7  |

|        |       |       |       |       |
|--------|-------|-------|-------|-------|
| 410691 | 1.8   | 2.3   | 1.4   | 2.4   |
| 449674 | 3     | 2.5   | 2.8   | 5.4   |
| 317635 | 11.9  | 5.5   | 7.8   | 9.8   |
| 389937 |       |       | 1.9   |       |
|        |       |       |       |       |
| 441423 | 16    | 11.8  | 11.2  | 12.3  |
| 443403 | 1.4   | 1.9   |       | 2.2   |
| 458428 | 80.1  | 51.9  | 54.7  | 52.1  |
| 452488 | 25.9  | 20.2  | 17.3  | 22.4  |
| 444185 | 1.4   |       |       |       |
| 444589 | 2.5   | 2     | 2.6   | 2.2   |
| 468862 | 2.5   | 2.4   | 3     | 2.2   |
| 367390 |       |       |       | 2.2   |
| 396268 | 52    | 39.3  | 55    | 49.4  |
| 265826 | 19.1  | 16.1  | 15.8  | 28.2  |
| 428458 | 134.1 | 152   | 217.3 | 171.4 |
| 346456 | 37.9  | 33.3  | 35.9  | 32.1  |
| 265575 | 18.8  | 23.7  | 23.9  | 30.5  |
| 340469 | 15.1  | 9.9   | 12    | 11.5  |
| 382430 | 160   | 96.9  | 118.5 | 102.1 |
| 400906 | 47.9  | 40.5  | 44.2  | 40.2  |
| 374130 | 127.9 | 111.9 | 156.3 | 117.6 |
| 456976 | 26.8  | 17.5  | 28    | 20.7  |
| 404748 | 161.5 | 127.2 | 162.5 | 125.8 |
| 322001 |       | 1.7   | 2.6   |       |
| 455795 | 9.5   | 3.2   | 2.9   | 6.2   |
| 400867 | 17.7  | 18.3  | 18.6  | 16.3  |
| 449954 | 10.3  | 7.2   | 12.8  | 6.1   |
| 424521 | 90.2  | 83.1  | 88.2  | 72.9  |
| 424390 | 144.7 | 104.5 | 118.5 | 97.5  |
| 458810 | 25.8  | 22.9  | 28.8  | 40.8  |
| 454825 | 231.4 | 155.3 | 280.5 | 216.4 |
| 356247 | 2     | 2.1   | 2.9   |       |
| 381420 | 1.8   | 1.9   | 1.6   |       |
| 355773 | 2.7   |       | 2     | 5.6   |
| 382210 | 16.9  | 15.3  | 18.3  | 15    |
| 263626 | 53.9  | 54.7  | 71.2  | 63.9  |
| 352867 | 7.2   | 5.3   | 2.7   | 5.2   |
| 396627 | 30.2  | 23.5  | 24.7  | 24.1  |
| 433122 | 8.8   | 8.8   | 7.3   | 7.4   |
| 432964 | 2.6   | 2.6   | 5.7   | 2     |
| 302983 |       |       |       | 1.3   |
| 431613 | 215.1 | 149.7 | 158.6 | 140.8 |
| 310292 | 67    | 66.4  | 71.3  | 78    |
| 310916 | 36.7  | 40.2  | 40.6  | 58.2  |
| 435475 | 2.7   | 1.8   | 2.5   | 2.4   |
| 431479 | 19.3  | 31    | 40.8  | 27.7  |
| 451969 | 18.1  | 14.4  | 11.5  | 15    |
| 404938 | 23.9  | 23.7  | 27.5  | 23.7  |
| 409735 | 99.2  | 74.3  | 105.6 | 105.7 |
| 399173 | 10.5  | 9.4   | 10.5  | 10    |
| 402709 | 10    | 9     | 10    | 7.6   |

|        |       |       |       |       |
|--------|-------|-------|-------|-------|
| 382522 | 79.5  | 57.6  | 73.3  | 59.3  |
| 292521 | 6.1   | 6.9   | 18.5  | 8.7   |
| 342756 | 15.6  | 13.2  | 16.2  | 20.9  |
| 311219 | 19.8  | 18.8  | 25.8  | 20.2  |
|        |       |       |       |       |
| 338446 | 129.1 | 99.7  | 132.9 | 113   |
| 470395 | 1.9   | 1.5   | 3     | 2.4   |
| 421071 | 20.8  | 18    | 17.1  | 24.8  |
| 369602 | 53.8  | 42.5  | 48.2  | 61.6  |
| 451946 | 38.1  | 30.1  | 31.5  | 37.5  |
| 428656 | 209.6 | 158.3 | 195.5 | 162.9 |
| 377237 | 26.9  | 22.7  | 25.9  | 21    |
| 450459 | 29.9  | 11.7  | 11.1  | 13.9  |
| 258458 | 33.4  | 17.7  | 54.5  | 16.3  |
| 290773 | 9.4   | 9.3   | 12    | 7.6   |
| 444788 |       |       | 1.7   |       |
|        |       |       |       |       |
| 319706 | 14.1  | 13.2  | 22.9  | 16.7  |
| 410117 | 8.7   | 8.3   | 10.3  | 9.4   |
| 417671 |       | 2     |       | 2.4   |
| 426745 | 27.2  | 22    | 25.7  | 34.9  |
| 417331 | 2     | 1.9   |       | 2     |
| 396193 | 20.4  | 17.8  | 24.3  | 21.8  |
| 461090 | 7.8   | 7.5   | 7.3   | 6.4   |
| 346955 | 58.9  | 41    | 66.4  | 34.6  |
| 397758 | 14.6  | 10.9  | 15.1  | 12.4  |
| 451496 | 7.6   | 8.5   | 8.8   | 8.5   |
| 371078 | 31.2  | 28.4  | 27    | 28.9  |
|        |       |       |       |       |
|        |       |       |       |       |
| 291825 | 5.8   | 6.8   | 11.1  | 8.2   |
| 291604 | 1.9   | 3.2   | 7.3   | 2.9   |
| 364480 | 1.8   |       |       | 1.8   |
| 373035 | 40.8  | 30.7  | 54.2  | 32.3  |
| 346518 | 257.7 | 192.3 | 271.6 | 217.7 |
| 396608 | 40.2  | 37.1  | 48.8  | 43.4  |
| 465492 | 2.3   |       | 2.2   | 1.9   |
|        |       |       |       |       |
| 463257 | 1.8   | 2.3   | 3.2   | 2.3   |
| 451724 | 35.8  | 25.5  | 26.4  | 27    |
| 373035 | 40.8  | 30.7  | 54.2  | 32.3  |
| 400807 | 123.3 | 95.5  | 117.1 | 107.9 |
| 430264 | 14.8  | 11.1  | 13.5  | 15.6  |
| 401783 | 97.9  | 70.8  | 86.5  | 68.3  |
| 263190 | 51.3  | 62.2  | 112.3 | 79.5  |
| 431131 | 2.9   | 1.6   | 2.5   | 1.9   |
| 450675 | 35.8  | 24.2  | 23.9  | 25.1  |
| 311345 | 43.1  | 34.5  | 43.4  | 38.2  |
| 330836 | 1.9   |       |       | 1.7   |
| 469027 | 2.7   | 3     | 5.4   | 2.1   |
| 429214 | 12.4  | 11.8  | 17.2  | 13    |
| 448853 | 55.1  | 28.4  | 40.6  | 27    |

|        |       |       |       |       |
|--------|-------|-------|-------|-------|
| 353507 | 2.4   | 2.3   | 2.7   |       |
| 332263 | 2.4   |       | 1.4   | 2     |
| 431900 | 72.2  | 46.4  | 38.5  | 46.2  |
|        |       |       |       |       |
| 372319 | 17    | 16.7  | 14.9  | 17.6  |
| 468735 | 2     |       | 2.4   | 2.1   |
| 373896 | 14.5  | 13.9  | 14.3  | 12.4  |
| 474469 | 14.9  | 13    | 16.2  | 15.4  |
| 263317 | 111.9 | 73.1  | 105.2 | 79.5  |
| 431548 | 170.3 | 149.7 | 206.6 | 156.3 |
| 428550 | 38.8  | 30.7  | 37.4  | 38.6  |
| 413936 | 108.1 | 89.5  | 108.7 | 87.1  |
| 336423 | 22.3  | 13.1  | 16    | 14.6  |
| 333898 | 336.1 | 281.8 | 434.6 | 410.4 |
|        |       |       |       |       |
| 378971 | 17.7  | 12.6  | 14.7  | 8.5   |
| 375728 | 12.7  | 8.2   | 11    | 11.1  |
| 428939 | 105   | 100.1 | 118.6 | 94.7  |
| 335012 | 124.8 | 104   | 125   | 102.2 |
| 429022 | 34.4  | 26.9  | 31.7  | 28.2  |
| 443338 |       | 1.5   | 2.2   |       |
| 286403 | 24.5  | 22.5  | 16.6  | 27.7  |
| 286704 | 9.7   | 9.5   | 6.7   | 3.1   |
| 408186 | 8.9   | 7.2   | 6.7   | 6.1   |
| 376381 | 31.2  | 14.9  | 14.7  | 16.5  |
| 376189 | 41.3  | 29.7  | 38.7  | 28.8  |
| 441368 |       |       | 1.3   |       |
| 429197 | 2.3   | 2.4   | 5.4   | 3.4   |
| 379566 | 15.1  | 15.9  | 15.8  | 16.2  |
| 439939 | 12.2  | 11    | 10.7  | 9.8   |
|        |       |       |       |       |
| 336915 | 140.7 | 113.1 | 164.9 | 152.5 |
| 357679 | 3     | 1.5   | 2.1   | 2.7   |
| 450654 | 24.4  | 18    | 18.6  | 17.4  |
| 428523 | 211.2 | 190.8 | 145   | 179.1 |
| 301184 | 1.5   |       |       | 1.8   |
| 449492 | 3.3   | 2.2   | 6.4   | 2.9   |
| 443641 |       | 1.4   |       |       |
| 386106 | 2.8   | 2.4   | 3.3   | 1.9   |
| 386630 | 8.4   | 3.2   | 8.9   | 2.9   |
| 405639 | 1.5   |       |       |       |
| 440385 | 8.4   | 6.6   | 10.1  | 8.9   |
| 310419 | 142   | 182.8 | 283.7 | 243.1 |
| 396525 | 7.7   | 3.3   | 9.2   | 10.6  |
|        |       |       |       |       |
| 263055 | 23    | 18.5  | 30.9  | 21.9  |
| 447801 |       |       |       | 2.2   |
| 448507 | 13.5  | 7.8   | 10.8  | 12.1  |
| 449971 | 6.6   | 2.7   | 9.4   | 6     |
| 453586 | 15.7  | 11.8  | 16    | 11.5  |
| 473506 |       |       | 1.8   | 1.8   |
| 287743 | 10.4  | 10.5  | 9.1   | 11.2  |

|        |       |       |       |       |
|--------|-------|-------|-------|-------|
|        |       |       |       |       |
| 373948 | 144.3 | 142.3 | 189.1 | 126.7 |
| 458997 | 28.7  | 24.8  | 26.4  | 28.3  |
| 465840 |       | 1.8   | 1.8   | 1.8   |
| 460135 | 85.2  | 71.5  | 121.8 | 65.1  |
| 356245 | 2.4   | 1.8   | 2.6   |       |
| 310256 | 290.6 | 203.4 | 266.7 | 246.9 |
| 315838 | 1.7   | 1.5   | 2.3   | 1.6   |
| 393713 | 51    | 35.6  | 40.9  | 35.2  |
| 438291 | 3     | 2.2   | 1.7   | 1.9   |
| 449069 | 19    | 17.3  | 21.4  | 21.3  |
| 399212 | 19.1  | 15.7  | 16.7  | 15.6  |
| 449069 | 19    | 17.3  | 21.4  | 21.3  |
| 464869 | 207.6 | 152.7 | 169.3 | 158.3 |
| 349439 | 8.3   | 3.1   | 8.5   | 9     |
| 423772 | 7.1   | 7.3   | 7.5   | 8.8   |
| 462969 | 2.6   | 1.7   | 2.1   | 2.2   |
| 347114 | 21.5  | 16.5  | 21.8  | 19.7  |
| 429284 | 12.9  | 11.1  | 12.1  | 12.5  |
| 451828 | 19.9  | 16.5  | 15.9  | 21.6  |
| 424372 | 198.4 | 158.8 | 181.8 | 149   |
| 346541 | 45.3  | 34.1  | 39.5  | 31.4  |
| 377719 | 53.9  | 39.5  | 54.9  | 42.9  |
| 421816 | 2.4   | 2.5   | 3.3   | 5.7   |
| 277515 | 1.2   |       |       |       |
| 361889 |       |       | 1.9   |       |
| 449696 | 2.8   | 1.7   | 5     | 5.7   |
| 334950 | 109   | 86.5  | 92.3  | 96.1  |
| 399821 | 43    | 37.1  | 40.8  | 45    |
| 409034 | 5.7   | 5.2   | 3.1   | 3.2   |
| 452500 | 44.2  | 31.9  | 50.4  | 49.6  |
| 321539 | 32.4  | 23    | 23.7  | 27.7  |
| 449591 | 5.4   | 2.6   | 5.3   | 2.8   |
| 385065 | 5     | 2.6   | 4.8   | 2.1   |
| 396440 | 13.4  | 10.5  | 12.2  | 14.5  |
| 301429 | 2.2   |       | 1.9   | 1.9   |
| 452994 | 3.4   | 2.4   | 5.6   | 5.7   |
| 371542 | 20    | 14.2  | 20.1  | 19.4  |
| 448265 | 24.7  | 20.3  | 23.1  | 12.5  |
| 438277 | 2.4   | 2.1   | 1.7   | 2.6   |
| 448265 | 24.7  | 20.3  | 23.1  | 12.5  |
| 312959 | 324.7 | 253.1 | 345.6 | 293.2 |
| 467808 | 6.5   | 5.9   | 2.7   | 2.9   |
| 340811 | 6.7   | 6.9   | 6.6   | 7.8   |
|        |       |       |       |       |
| 382320 | 204.6 | 160.7 | 203.9 | 167.8 |
|        |       |       |       |       |
| 462489 | 8.2   | 8.2   | 5.6   | 8     |
| 443068 | 2.6   | 2.4   | 2.5   | 1.9   |
| 379140 | 8     | 5.5   | 6.8   | 6.5   |
| 459262 | 3.3   | 2.7   | 3.3   | 1.6   |
| 286935 | 5.8   | 5.1   | 8.2   | 10.2  |

|        |       |       |      |       |
|--------|-------|-------|------|-------|
| 315900 | 14    | 16.4  | 8.7  | 8.7   |
| 399753 | 9.1   | 6.7   | 11.7 | 12.3  |
| 385244 | 2.9   | 1.7   | 2.2  | 1.8   |
|        |       |       |      |       |
|        |       |       |      |       |
| 291752 | 3.1   | 1.4   | 2.2  | 1.6   |
| 348934 | 8.5   | 2.9   | 8.2  | 5.6   |
| 441553 | 1.8   | 2.7   | 1.3  | 1.7   |
| 463779 | 10.2  | 7.6   | 6.9  | 9     |
| 466060 | 2.8   | 1.7   | 5.3  | 2.5   |
| 404636 | 8.5   | 7     | 7.1  | 6.5   |
| 423685 | 35.3  | 20.6  | 26   | 33.6  |
| 263709 | 14.5  | 14.2  | 18.8 | 14.4  |
| 288348 | 12.5  | 22.6  | 14.7 | 32.7  |
| 402509 | 5.5   | 8.5   | 11.2 | 7.7   |
| 293328 | 8.4   | 7.1   | 9.7  | 6.1   |
| 459991 | 5.4   | 2.1   | 3.1  | 2.3   |
| 357730 | 7.4   | 6.2   | 6.7  | 4.9   |
| 448463 | 7.4   | 6.4   | 7.3  | 11.3  |
| 404473 | 12.7  | 13.7  | 13   | 15    |
| 448463 | 7.4   | 6.4   | 7.3  | 11.3  |
| 310886 | 20.5  | 19.5  | 22   | 20.5  |
| 382610 | 41.1  | 28.3  | 28.1 | 24.2  |
| 378960 | 39.5  | 36.1  | 51.8 | 38.3  |
|        |       |       |      |       |
| 451928 | 14.5  | 7.8   | 18.6 | 12.2  |
| 429325 | 40.4  | 32.6  | 31.4 | 34.6  |
| 306640 | 47.9  | 42.8  | 51.9 | 57.3  |
| 312726 | 152.9 | 143.9 | 220  | 177.9 |
| 469235 |       | 1.6   | 2.1  | 2.9   |
| 441228 | 1.6   |       |      |       |
| 316955 | 19.3  | 26.1  | 18   | 16.7  |
| 402079 | 6.3   | 3.3   | 5.5  | 3.2   |
| 459999 | 7.4   | 6.4   | 6.8  | 6.7   |
| 360102 | 9.5   | 5.6   | 10.8 | 5.7   |
| 287635 | 14.7  | 11.2  | 16.9 | 13.6  |
| 465165 | 19.2  | 13.8  | 17.6 | 15.6  |
| 337480 | 91.7  | 90.1  | 88.9 | 94.5  |
| 425371 | 9.3   | 6.1   | 9.3  | 7.1   |
| 265312 | 24.2  | 19.6  | 22.8 | 20.7  |
| 425423 | 28.5  | 21.9  | 26.4 | 29.2  |
| 265312 | 24.2  | 19.6  | 22.8 | 20.7  |
| 372293 | 46    | 45.5  | 49.3 | 44.5  |
|        |       |       |      |       |
| 473030 | 2.1   |       | 1.9  | 1.5   |
| 450937 | 91    | 92.2  | 81.6 | 104.8 |
| 372404 | 39.8  | 32.1  | 33.7 | 33.7  |
|        |       |       |      |       |
| 424858 | 8.9   | 7.2   | 11.4 | 7.6   |
| 451196 | 12.2  | 11.2  | 15.2 | 12.1  |
| 456254 | 67.3  | 57.7  | 63.8 | 71.5  |
| 462710 | 8.6   | 5.6   | 6.9  | 8.8   |

|        |       |       |       |       |
|--------|-------|-------|-------|-------|
| 435677 | 5.5   | 3     | 6.4   | 5.6   |
| 400661 | 37.7  | 25.9  | 26.9  | 26.4  |
| 434924 | 16.4  | 15.1  | 16.3  | 15.2  |
| 441255 | 9.4   | 3.1   | 9.2   | 8.7   |
| 427146 | 12    | 8.3   | 13.7  | 11.4  |
| 461243 | 2.4   | 1.5   | 1.7   | 1.4   |
| 459415 | 12.1  | 10.3  | 12.6  | 9     |
| 285736 | 10.2  | 6.1   | 8.9   | 8.8   |
|        |       |       |       |       |
| 425650 | 1.6   |       | 2     |       |
| 454640 | 23.8  | 17.2  | 22.3  | 19.2  |
| 458091 | 139.5 | 102.1 | 135.9 | 98.5  |
| 266051 | 11.1  | 10.5  | 11.9  | 18.6  |
| 440773 | 5.5   | 1.8   | 2.4   | 2.4   |
| 311662 | 23.1  | 19.1  | 19.7  | 20    |
| 284541 | 21.9  | 24.6  | 17.2  | 31    |
| 284541 | 21.9  | 24.6  | 17.2  | 31    |
| 361637 |       | 1.4   | 1.6   | 1.5   |
| 357801 | 1.9   |       | 2.1   |       |
| 424556 | 86.7  | 69.7  | 75    | 70.3  |
| 463974 | 1.5   |       | 1.9   | 2.4   |
| 431781 | 111.8 | 99    | 91.8  | 102.1 |
| 295830 | 5.4   | 2.9   | 7.8   | 3.2   |
| 370344 | 51.9  | 40.1  | 32.4  | 35.7  |
| 397979 | 2     | 2.3   | 2     | 2.1   |
| 313109 | 210.6 | 168.9 | 217.9 | 198.8 |
| 445096 |       |       | 2.2   | 2.2   |
| 459579 | 12.9  | 13    | 12.6  | 12.8  |
|        |       |       |       |       |
| 448077 | 46.6  | 29    | 42.9  | 35.6  |
| 449054 | 6.6   | 7.3   | 10.2  | 7     |
| 400484 | 14.7  | 12    | 10.4  | 11.4  |
| 419889 | 1.7   | 1.8   | 1.9   |       |
| 336506 | 8.5   | 6     | 6.1   | 8.2   |
| 396250 | 47.5  | 38.5  | 51.6  | 42.1  |
| 444450 | 2     |       | 2.8   | 2.9   |
| 340302 | 13.3  | 7.6   | 5.5   | 7.9   |
| 428552 | 41.3  | 26.7  | 38    | 35.3  |
|        |       |       |       |       |
| 400168 | 11    | 10.7  | 12.5  | 9.9   |
| 288986 | 118.2 | 105.3 | 125.5 | 144.3 |
| 342299 | 19.9  | 12.6  | 18.7  | 11.5  |
| 367121 |       |       | 1.9   |       |
| 439629 | 13.8  | 14.8  | 13.2  | 14.5  |
| 374149 | 8.6   | 8.4   | 12.6  | 9.5   |
| 456084 | 42    | 32    | 36    | 39.5  |
| 263200 | 275.2 | 245.7 | 388.4 | 279.9 |
| 468079 | 7.9   | 9.6   | 15.2  | 7.8   |
| 393403 | 42.2  | 27.7  | 37.3  | 43.6  |
| 384462 | 5.1   | 5.2   | 2.6   | 2     |
| 265714 | 11.5  | 15    | 13.7  | 16.9  |
| 380754 | 2.3   |       |       | 1.6   |

|        |       |       |       |       |
|--------|-------|-------|-------|-------|
| 449228 | 18.5  | 10.1  | 44.4  | 17.4  |
| 449228 | 18.5  | 10.1  | 44.4  | 17.4  |
| 416279 | 2.3   | 1.6   | 3     | 1.8   |
|        |       |       |       |       |
| 292667 | 16.6  | 12.6  | 14.2  | 14.8  |
| 463814 | 2     | 2.3   | 1.7   | 5.4   |
| 400708 | 208.3 | 136.1 | 175.4 | 144.9 |
|        |       |       |       |       |
| 465179 | 5.4   | 2.4   | 2.8   | 5.5   |
| 304606 | 43.5  | 40.3  | 52.4  | 41.1  |
| 448282 | 6.3   | 2.6   | 7.2   | 9.2   |
|        |       |       |       |       |
| 459664 | 20.6  | 16.4  | 20.4  | 18.8  |
| 462498 | 2.6   | 2.5   | 3.3   | 2.8   |
| 418737 |       | 2     | 3     | 2.6   |
| 456114 | 28.2  | 24.2  | 26.7  | 34.4  |
| 341856 | 1.8   | 2.2   | 1.9   |       |
| 378241 | 30.5  | 27    | 37.3  | 29.9  |
| 463856 | 7.3   | 6.8   | 6     | 5.7   |
| 264888 | 6.9   | 3.2   | 6.1   | 3.4   |
| 448821 | 32    | 16.6  | 29    | 20.7  |
| 449470 | 23.3  | 23.4  | 23.1  | 23    |
| 342410 | 17.2  | 14.2  | 12.6  | 12.7  |
|        |       |       |       |       |
| 446222 |       | 3.2   | 2.7   | 3.2   |
| 315841 | 3.1   | 2.8   | 2.5   | 3.2   |
| 310695 | 263.7 | 151.4 | 196.2 | 178.5 |
| 374045 | 172.2 | 103.3 | 135   | 106.4 |
| 448408 | 7     | 5.7   | 9.4   | 5.5   |
| 313626 | 37.1  | 24.4  | 34    | 34.2  |
| 394529 | 19.7  | 15.4  | 13.7  | 18.8  |
| 471797 |       | 1.4   | 1.8   |       |
| 283160 | 13.7  | 11.5  | 14.9  | 11    |
| 452351 | 2.6   | 2.5   | 2.4   |       |
|        |       |       |       |       |
| 345040 | 16.7  | 17.1  | 15.2  | 15.8  |
| 286167 | 6.9   | 6.1   | 9.1   | 7.1   |
| 434215 | 7.1   | 7.9   | 9.1   | 8.8   |
| 451971 | 18.8  | 17.7  | 26.5  | 21.3  |
| 384295 | 63.8  | 59.4  | 61.4  | 71.3  |
|        |       |       |       |       |
| 451860 | 39.3  | 35.1  | 32.1  | 34.7  |
| 451890 | 9     | 9.9   | 11.1  | 9.6   |
| 383352 | 2.1   | 3.3   | 3.3   | 2.9   |
| 383344 | 20.7  | 16.8  | 16.6  | 15.6  |
| 383276 | 40.9  | 36.2  | 46.5  | 39.8  |
| 383268 | 63.4  | 53.3  | 67    | 63.8  |
| 383176 | 5.7   | 3.2   | 5.4   | 2.6   |
| 383888 | 32.1  | 20.4  | 22.8  | 26.1  |
| 385173 | 76.6  | 72.6  | 80.7  | 82.2  |
| 385172 | 7.7   | 6     | 2.5   | 6.6   |
| 385102 | 38.4  | 32.9  | 37.2  | 34    |



|        |       |       |       |       |
|--------|-------|-------|-------|-------|
| 385099 | 54    | 45.7  | 61.6  | 57.7  |
| 385041 | 73    | 60.7  | 66.3  | 56.7  |
| 386062 | 3.2   | 3     | 2.5   | 2.2   |
| 386157 | 27.7  | 14.6  | 18.4  | 16.7  |
| 380493 | 125.1 | 40.4  | 36.2  | 39.5  |
| 380647 | 24.1  | 18.5  | 21.3  | 21    |
| 452955 | 18.9  | 19.6  | 19.1  | 20    |
| 379478 | 92.4  | 52.6  | 77.8  | 49.1  |
| 379302 | 122.2 | 100.7 | 106.9 | 109.4 |
| 379297 | 100.6 | 90.7  | 99.2  | 112   |
| 453092 | 55    | 53.8  | 59    | 59.4  |
| 453096 | 10.7  | 11.8  | 10.8  | 10.5  |
| 452398 | 105.5 | 87.2  | 101.7 | 100.1 |
| 382913 | 44.2  | 26.4  | 31.1  | 27.1  |
| 382882 | 2.7   |       | 2.5   |       |
| 381356 | 24.2  | 10.2  | 11.1  | 13.6  |
| 452435 | 42.3  | 27    | 27.5  | 37.4  |
| 381662 | 45.6  | 43.9  | 47.8  | 45.4  |
| 381659 | 62.8  | 55.3  | 58.4  | 55.4  |
| 452489 | 13    | 7.2   | 8.4   | 11.3  |
| 450025 | 12.7  | 12.1  | 10.3  | 15.4  |
| 395564 | 83.1  | 89.5  | 80.5  | 100.5 |
| 450022 | 16.9  | 25.1  | 22.7  | 28.4  |
| 450148 |       |       | 1.7   |       |
| 393844 | 78.2  | 45    | 63.1  | 52.5  |
| 394658 | 102.4 | 42.7  | 55.5  | 45.3  |
| 450416 | 10.1  | 11.3  | 14.8  | 17.4  |
| 398257 | 33.4  | 25.7  | 30.6  | 23    |
| 398116 | 58.5  | 46.9  | 33.1  | 48.2  |
| 398084 | 122.5 | 99.9  | 94.7  | 121.4 |
| 397766 | 43.6  | 43.8  | 45.6  | 41.2  |
| 397759 | 100.1 | 94.3  | 105.4 | 95.1  |
| 397681 | 52.7  | 44.4  | 46.9  | 44.7  |
| 398705 | 51.9  | 22.6  | 33.5  | 31.1  |
| 398382 | 3     | 6.7   | 8     | 5.4   |
| 397680 | 36.4  | 33.4  | 35.1  | 29.9  |
|        |       |       |       |       |
|        |       |       |       |       |
| 449735 | 26.8  | 16.8  | 20.6  | 20    |
| 397297 | 90.6  | 78.7  | 102   | 74.5  |
| 397198 | 17.7  | 14.6  | 21.6  | 19.2  |
| 388493 | 10    | 2.9   | 2.9   | 1.5   |
| 388435 | 6.1   | 1.4   | 1.7   | 2.1   |
| 388410 | 8.2   | 1.9   | 1.4   | 2.3   |
| 387954 |       | 2.2   | 5.4   | 1.8   |
| 450844 | 37    | 44.6  | 45.6  | 45.6  |
| 450864 | 32.3  | 29.1  | 34.1  | 31.1  |
| 362941 | 9.6   | 10.3  | 10.4  | 12.6  |
| 363084 | 6.3   | 5.2   | 5.4   | 6.9   |
| 363104 | 16.6  | 20.4  | 17.3  | 21.4  |
| 363087 |       | 2     |       | 1.4   |
| 361205 | 88.4  | 30.5  | 35.3  | 27.2  |

|        |       |       |       |       |
|--------|-------|-------|-------|-------|
| 361176 | 3     | 3.1   | 6.4   | 2.9   |
| 361054 | 36.4  | 14.5  | 22.4  | 14.5  |
| 361017 | 30.6  | 13.7  | 19.6  | 17.3  |
| 361011 | 103.5 | 83.6  | 97.7  | 100.8 |
| 360986 | 28.8  | 25    | 27.5  | 26.7  |
| 360848 |       | 1.5   | 2.4   | 2.8   |
|        |       |       |       |       |
|        |       |       |       |       |
| 365313 | 1.7   | 1.5   |       |       |
| 365254 | 2.5   |       | 2.1   | 1.9   |
| 365141 | 2.1   |       | 2.6   |       |
| 365073 | 5.8   | 1.9   | 5.8   | 2.8   |
| 365050 | 12.1  | 10.5  | 10.4  | 10.3  |
|        |       |       |       |       |
| 364970 | 12.4  | 11.8  | 14.3  | 11.2  |
| 364941 | 58.6  | 42.9  | 49    | 44.8  |
| 355099 | 18.8  | 13.9  | 20.1  | 21.2  |
| 354876 | 56.5  | 53.3  | 46.4  | 64.3  |
| 353881 | 23.5  | 21.3  | 20.2  | 22.1  |
| 356106 | 13    | 13.4  | 21.7  | 17.8  |
| 457138 | 21    | 17.5  | 16    | 18.3  |
| 375990 | 66.7  | 46.4  | 54.3  | 47    |
| 375890 | 28.8  | 26.8  | 30    | 27.6  |
| 453964 | 24.6  | 23.4  | 21.4  | 29.1  |
| 453967 | 16    | 13.9  | 12.9  | 19.2  |
| 454062 | 187.9 | 91.6  | 67.5  | 94.9  |
| 376106 | 49.7  | 35.9  | 36.9  | 48.6  |
| 454071 | 24.5  | 11.3  | 9.8   | 14.2  |
| 374256 | 28.5  | 16.3  | 14.3  | 15.9  |
| 374199 | 223   | 130.8 | 155.4 | 124.8 |
| 454607 | 22.9  | 13.7  | 9     | 12    |
| 378162 | 153.7 | 105.2 | 99.4  | 113.7 |
| 378148 | 133.8 | 118.8 | 129.3 | 133.2 |
| 378067 | 34.9  | 10.9  | 12.4  | 12    |
| 453445 | 25.4  | 18.6  | 24.1  | 24.5  |
| 378822 | 39.4  | 39.2  | 50.6  | 48    |
| 453427 | 17.9  | 15.7  | 20    | 15.3  |
| 377665 | 10.6  | 9.9   | 11.9  | 11    |
| 377558 | 1.7   | 1.7   |       |       |
| 369806 | 68.6  | 60.1  | 43.6  | 61.9  |
| 367697 | 124.9 | 78    | 125.9 | 66.1  |
| 455109 | 28.8  | 25.4  | 28.8  | 24.9  |
| 372568 | 7.1   | 7.5   | 6.1   | 7.3   |
| 455156 | 105.4 | 76.2  | 95.1  | 84.9  |
| 455157 | 15.3  | 19.7  | 22.1  | 23.6  |
| 372479 | 8.2   | 5.6   | 8.8   | 10    |
| 455186 | 29.7  | 24.8  | 32.9  | 30.9  |
| 455020 | 77.6  | 73.9  | 97    | 83    |
| 373148 | 35.6  | 28    | 28.6  | 35.5  |
| 373140 | 41.8  | 35.2  | 30.5  | 35.6  |
| 373132 | 52.3  | 47.8  | 57.7  | 66.4  |
| 454977 | 13    | 10.4  | 16.7  | 15.4  |

|        |       |       |       |       |
|--------|-------|-------|-------|-------|
| 371353 | 149.6 | 116.1 | 121.1 | 153.4 |
| 455279 | 88.9  | 60.9  | 69.2  | 71.5  |
| 455292 | 74.5  | 59.1  | 60.3  | 54.4  |
| 455225 | 18.1  | 15.6  | 15.2  | 14.2  |
| 443782 | 6.6   | 7.2   | 11    | 9     |
| 428832 | 72.8  | 64.8  | 76.5  | 67.9  |
| 428827 | 137.1 | 115.9 | 133.4 | 131.5 |
| 428925 | 92.7  | 88    | 95    | 88    |
| 427799 | 82.9  | 86.9  | 114.9 | 91.1  |
| 427771 | 89.7  | 100   | 132.1 | 142.6 |
| 427713 | 222.2 | 170.3 | 178.2 | 148.5 |
| 444030 | 18.4  | 7.3   | 5.9   | 6     |
| 427846 | 83.3  | 99    | 118.3 | 126.1 |
| 428129 | 26.6  | 29.3  | 18.8  | 27.9  |
| 428069 | 113.2 | 59.3  | 94.6  | 74.4  |
| 428016 | 145.4 | 119.4 | 125   | 136.6 |
| 427965 | 80.1  | 68.5  | 75.4  | 64.3  |
| 427931 | 84.8  | 88.8  | 106.4 | 105.9 |
| 427872 | 110.7 | 104.9 | 131.5 | 101.9 |
| 429272 | 7.2   | 6.4   | 12    | 22.8  |
| 430298 | 9.5   | 14.9  | 12.6  | 20.3  |
| 430293 | 43.9  | 35.7  | 29.6  | 28.3  |
| 430291 | 24.4  | 24.1  | 32    | 31.6  |
| 430262 | 88.8  | 82.3  | 74.9  | 60.3  |
| 430256 | 33.5  | 26.4  | 27.8  | 27.2  |
| 430252 | 91.3  | 83.9  | 98.8  | 86.5  |
| 430173 | 10    | 7.6   | 8.7   | 8.5   |
| 443115 | 5.7   | 2.8   | 4.6   | 6.4   |
| 442890 | 2.3   |       | 2.7   | 1.6   |
| 443021 | 21.6  | 17.8  | 21    | 19    |
| 443043 | 1.8   | 1.7   | 2.4   |       |
| 430394 | 18.7  | 23.8  | 21.1  | 27.4  |
| 430393 | 14.1  | 13.5  | 16.2  | 16    |
| 430392 | 57.9  | 63.6  | 56.6  | 76.4  |
| 429570 | 49.3  | 44.6  | 49.3  | 48.7  |
| 429554 | 41.6  | 44.4  | 38.3  | 42.6  |
| 429422 | 24    | 23    | 22.3  | 22.6  |
| 429665 | 174.3 | 107.7 | 126.6 | 120.4 |
| 429691 | 50.5  | 29.8  | 39.5  | 39.6  |
| 429774 | 101.5 | 71.7  | 64.6  | 80.8  |
| 429729 | 17.6  | 14.1  | 12.5  | 21.2  |
| 427290 | 25.2  | 15.9  | 17    | 17.9  |
| 445294 | 14.1  | 9.6   | 11    | 8.7   |
| 445573 | 12.1  | 10.8  | 6     | 9.5   |
| 424961 | 23.6  | 17    | 15.4  | 19    |
| 426721 | 37.2  | 15.9  | 23.8  | 19    |
| 426044 | 73.2  | 42    | 63.9  | 53.8  |
| 425961 | 40.5  | 34.6  | 48.2  | 48.1  |
| 425771 | 82.4  | 76    | 91.2  | 82    |
| 425730 | 95.6  | 90    | 98.5  | 91.6  |
| 436244 | 16.7  | 6.3   | 8.5   | 8.1   |
| 436225 | 40.3  | 17.5  | 14.8  | 14.9  |

|        |       |       |       |       |
|--------|-------|-------|-------|-------|
| 436077 | 16.7  | 14.4  | 12.9  | 30.2  |
| 440397 | 7.3   | 5.1   | 7.9   | 7.4   |
| 439277 | 46    | 31.4  | 45.8  | 49    |
| 439385 | 9.8   | 7.7   | 9.2   | 9.7   |
| 439297 | 23.3  | 17.6  | 20.4  | 20.2  |
| 440265 | 54.6  | 51.2  | 61.1  | 55.3  |
| 440339 | 40.2  | 27.7  | 34.3  | 38.7  |
| 437430 | 14    | 7.9   | 8.3   | 8.4   |
| 437547 | 9.2   | 5.7   | 5.2   | 1.9   |
| 432274 | 8     | 2.5   | 2.7   | 3.2   |
| 432747 | 28.8  | 16.2  | 20.7  | 17.8  |
| 432643 | 32.4  | 20.3  | 19.4  | 26.1  |
| 434251 | 33.7  | 34    | 44.9  | 43.2  |
| 434344 | 37.8  | 39.4  | 35.9  | 39.1  |
| 434365 | 31.1  | 27.9  | 24.9  | 23.9  |
| 434454 | 19.1  | 15.9  | 15.8  | 17.1  |
| 405873 | 8.9   | 8.8   | 9.1   | 10.5  |
| 405870 | 23.1  | 29.9  | 31    | 31.3  |
| 405856 | 16    | 18    | 18.2  | 22.5  |
| 406056 | 11.1  | 7.8   | 8.7   | 9.2   |
| 406054 | 51.5  | 35.5  | 34.3  | 40.5  |
| 406034 | 40.2  | 27.2  | 31.4  | 28.2  |
| 404616 | 72.3  | 61.9  | 77.3  | 66.7  |
| 406546 | 8.2   | 7.9   | 11.4  | 7.4   |
| 408646 | 7.4   | 6.4   | 10.4  | 5.2   |
| 406652 | 40.7  | 29.3  | 31.1  | 40.2  |
| 446714 | 17.7  | 21.4  | 24    | 20.7  |
| 407541 | 9.2   | 8.1   | 9.2   | 6.4   |
| 407465 | 23.4  | 19.4  | 22.1  | 22.1  |
| 407430 | 44.7  | 38.9  | 45.1  | 37.6  |
| 407428 | 19.1  | 11.2  | 18.9  | 12    |
| 407426 | 17.1  | 15.5  | 19.7  | 18.2  |
| 407328 | 10.6  | 13.9  | 16.4  | 11.3  |
| 400159 | 179.6 | 88.6  | 140.5 | 106.1 |
| 400131 | 15    | 14    | 15    | 12.7  |
| 400986 | 14.1  | 10.1  | 10.1  | 11.5  |
| 400905 | 66    | 59.2  | 59.3  | 62.7  |
| 400826 | 23.4  | 18.2  | 18.3  | 16.7  |
| 400808 | 32.1  | 30.6  | 29.7  | 27.3  |
| 400804 | 35.5  | 25.1  | 25    | 38.1  |
| 400681 | 38.9  | 30.6  | 30.2  | 29.2  |
| 400108 | 220.9 | 203.5 | 148.8 | 132.9 |
| 399495 | 91.7  | 56.9  | 44.9  | 34.6  |
| 399493 | 157.6 | 65    | 74.4  | 64.9  |
| 399465 | 87.6  | 73.1  | 70.9  | 79.2  |
| 399374 | 69    | 37    | 40.4  | 34.2  |
| 448850 | 27.3  | 7.1   | 20.6  | 14.7  |
| 399582 | 127.4 | 56.1  | 57.4  | 53.1  |
| 400043 | 48.6  | 42.2  | 53    | 49.7  |
| 400031 | 117.4 | 111.3 | 144.6 | 124.7 |
| 402864 | 4.8   | 6     | 9.7   | 7.1   |
| 403000 | 17.8  | 15    | 14.5  | 12.8  |

|        |       |       |       |       |
|--------|-------|-------|-------|-------|
| 403456 | 26.6  | 16.2  | 16.2  | 14.3  |
| 448101 | 6.3   | 1.9   | 7.7   | 1.8   |
| 402024 | 21    | 12.8  | 18.1  | 16.9  |
| 401693 | 162.7 | 70    | 82.8  | 85    |
| 401640 | 7.3   | 6.2   | 8     | 9.1   |
| 402181 | 11.3  | 6.9   | 10.7  | 10.1  |
| 402413 | 19.1  | 17.3  | 15.3  | 16.9  |
| 446018 | 11.7  | 11.7  | 13.1  | 14.6  |
| 446052 | 11    | 10.7  | 9     | 10    |
| 417906 | 2.8   |       |       |       |
| 417880 | 18.7  | 12.2  | 13.1  | 12.5  |
| 419170 | 3     | 2.9   | 4.1   | 1.6   |
| 419147 | 2.1   | 2.2   | 2.5   | 2.2   |
| 445935 | 55.5  | 36.9  | 44.1  | 42.5  |
| 416429 | 92.2  | 50.9  | 45.5  | 55    |
| 416407 | 213.4 | 129.6 | 82.4  | 97.3  |
| 416347 | 35.1  | 29.7  | 34.1  | 43.2  |
| 416450 | 6.6   | 6.2   | 6.3   | 8.6   |
| 415953 | 35.5  | 31    | 37.3  | 29.1  |
| 416455 | 7.7   | 11.7  | 6.8   | 14.6  |
| 416583 | 42.9  | 47.8  | 46.8  | 66.9  |
| 416575 | 40.3  | 43.5  | 41.9  | 65    |
| 416491 | 73.8  | 36.4  | 34.1  | 47.5  |
| 416484 | 29.3  | 14.4  | 14.4  | 20.9  |
| 419264 | 2.3   | 1.9   | 2.2   | 5.6   |
| 421855 | 10.7  | 8     | 9     | 10.8  |
| 445635 | 10.7  | 11    | 8.6   | 12.4  |
| 422119 | 56.5  | 49.3  | 75.7  | 64.7  |
| 422118 | 19    | 16.2  | 23.5  | 16.3  |
| 422117 | 267.4 | 257.9 | 329.6 | 332.8 |
| 419737 | 12.8  | 3.4   | 5.7   | 2.7   |
| 445802 | 25.7  | 20.2  | 19.7  | 24.3  |
| 419467 |       | 2.8   | 5.3   | 5.4   |
| 419409 | 5.5   |       |       | 1.8   |
| 419369 | 2.1   | 3.1   | 6.8   | 5     |
| 445857 | 21.7  | 21.1  | 29    | 25.3  |
| 419281 | 58.4  | 31.9  | 29.6  | 31.8  |
| 445750 | 30.3  | 22.1  | 23.8  | 21.2  |
| 446538 | 158.2 | 135.9 | 166.8 | 154.8 |
| 446560 | 184.9 | 167.1 | 190.1 | 206.1 |
| 446561 | 45.1  | 41.9  | 44.1  | 41.5  |
| 446510 | 51    | 43    | 46.9  | 49.9  |
| 409208 | 14.7  | 20.5  | 22.9  | 22.7  |
| 446611 | 301.8 | 239.6 | 267.4 | 280.5 |
| 446606 | 97.9  | 84.3  | 96.1  | 92.4  |
| 409804 | 32.8  | 11.3  | 16.3  | 16.2  |
| 446401 | 55.3  | 50    | 60.7  | 56.6  |
| 413939 | 37.6  | 11.3  | 14.9  | 19.1  |
| 415115 | 11.3  | 7.6   | 12.1  | 11.8  |
| 413824 | 7     | 2     | 2.4   | 2.4   |
| 412225 | 17.5  | 8     | 11.1  | 9.7   |
| 412217 | 23.2  | 12.7  | 15.5  | 12.6  |

|        |       |       |       |       |
|--------|-------|-------|-------|-------|
| 412459 | 23.2  | 17.6  | 18.8  | 19.6  |
| 412491 | 26.6  | 19.1  | 21.5  | 19.4  |
| 412558 | 10.5  | 7.7   | 9.9   | 7.2   |
| 413458 | 7.2   | 3.1   | 6.2   | 9.5   |
| 413443 | 46.8  | 32.7  | 38.9  | 40.1  |
| 412758 | 40.2  | 19    | 24.1  | 20.8  |
| 412758 | 40.2  | 19    | 24.1  | 20.8  |
| 412696 | 31.3  | 26    | 46    | 29.9  |
| 413595 |       |       | 1.5   | 1.4   |
| 325322 | 14    | 8     | 14.3  | 7     |
| 325320 | 22.1  | 14.5  | 20    | 13.8  |
| 325862 | 29.8  | 14.9  | 18    | 14.6  |
| 321561 | 32.1  | 29.4  | 27.6  | 26.4  |
| 323201 | 7     | 2.8   | 7.1   | 3.1   |
| 289408 | 39.7  | 30.8  | 37.8  | 38.8  |
| 334826 | 196.1 | 312.5 | 290.5 | 538.5 |
| 334708 | 58.9  | 49.9  | 38.9  | 64.1  |
| 474874 | 345.8 | 301.7 | 392.9 | 366.1 |
| 334691 | 228.5 | 192.3 | 145.6 | 228.5 |
| 474872 | 157.6 | 132.5 | 168.4 | 156.5 |
| 334354 | 227.2 | 193.3 | 149.8 | 197.8 |
| 334354 | 227.2 | 193.3 | 149.8 | 197.8 |
| 336081 | 58    | 48.9  | 57.8  | 65.8  |
| 474768 | 121.8 | 131.5 | 115.8 | 182   |
| 474769 | 125   | 138.1 | 115.2 | 172.7 |
| 474743 | 93.7  | 62.2  | 65.2  | 82.7  |
| 327355 | 22.4  | 16.7  | 18.7  | 15.8  |
| 327354 | 5     | 5.9   | 8.9   | 5.7   |
| 330436 | 2.8   | 5.4   | 2.2   | 4.9   |
| 329928 | 7     | 3.2   | 12.5  | 7.8   |
| 285282 | 78.6  | 53    | 56.9  | 60.8  |
| 472639 | 7.6   | 7.2   | 15.1  | 10.7  |
| 469310 | 295.5 | 128.9 | 93.7  | 78.6  |
| 471734 | 19.3  | 19.3  | 12.6  | 28.9  |
| 469351 | 100.3 | 34.9  | 48.9  | 40.2  |
| 469260 | 5.9   | 2.6   | 2.4   | 2.8   |
| 469190 | 35.6  | 20.2  | 30.8  | 26.3  |
| 469252 | 6.1   | 2.8   | 6.4   | 7.3   |
| 470618 | 8.6   | 14.4  | 13.1  | 24.4  |
| 470466 | 11.6  | 18.9  | 20.6  | 32.5  |
| 310769 | 12    | 14.6  | 17.6  | 12.7  |
| 311165 | 40    | 27.3  | 27.9  | 34.1  |
| 310166 | 115.9 | 60.6  | 103.7 | 68.6  |
| 310535 | 24.4  | 18.6  | 22.5  | 25.5  |
| 310643 | 18    | 16.9  | 19.6  | 19.3  |
| 310637 | 47.2  | 39.6  | 34.3  | 47.2  |
| 310611 | 36.9  | 30.5  | 29.3  | 31.8  |
| 469405 | 40.1  | 30.2  | 31.3  | 28.8  |
| 470912 | 6.9   | 6.2   | 7.6   | 8.3   |
| 469649 | 18    | 20.5  | 28.3  | 21.8  |
| 308600 | 96.7  | 53.7  | 70.2  | 61.8  |
| 470788 | 2.8   | 2.1   | 2.2   | 2.4   |

|        |       |       |       |       |
|--------|-------|-------|-------|-------|
| 469695 | 6     | 5.8   | 6.6   | 7.1   |
| 311735 | 150.1 | 82.2  | 85.9  | 80.3  |
| 307827 | 144.1 | 120.9 | 107.1 | 153.3 |
| 311623 | 48.1  | 32.6  | 34.9  | 36    |
| 473497 | 41.8  | 34.9  | 31.8  | 37.4  |
| 473660 | 54.6  | 40.1  | 42.5  | 45.9  |
| 473649 | 7.9   | 7.4   | 6.2   | 9.8   |
| 294709 | 230.7 | 136.6 | 172.1 | 118   |
| 473491 | 5.8   | 6.1   | 5.7   | 6.8   |
| 317014 | 21.2  | 15.2  | 15.2  | 16.4  |
| 293689 | 95.9  | 58    | 63.8  | 75.6  |
| 317000 | 32.4  | 26.6  | 26.3  | 23.4  |
| 293951 | 5.8   | 5.4   | 2.7   | 5.3   |
| 318526 |       | 1.6   | 1.7   |       |
| 318526 |       | 1.6   | 1.7   |       |
| 317850 | 56.1  | 13.9  | 17.8  | 12.8  |
| 317799 | 167   | 75.7  | 77.7  | 67.3  |
| 317732 | 30.5  | 24.6  | 30.6  | 30.8  |
| 317879 | 40.7  | 18.8  | 23.6  | 24.7  |
| 472873 | 6.1   | 6.6   | 11.4  | 11    |
| 467906 | 40    | 18.8  | 24.4  | 25.7  |
| 294855 | 175.2 | 74.9  | 93.2  | 82.3  |
| 294864 | 22.4  | 10.4  | 14.5  | 12.4  |
| 314773 | 87.8  | 58    | 51.9  | 62.2  |
| 468104 | 8.9   | 3.6   | 2.3   | 5.7   |
| 468046 | 15.3  | 7.4   | 8.6   | 8.9   |
| 467934 | 11    | 2.7   | 6.6   | 5.8   |
| 467991 | 53    | 23.5  | 24.7  | 28.8  |
| 475205 | 17.8  | 9.9   | 8.8   | 10.2  |
| 475203 | 103.3 | 61.1  | 60.7  | 68.7  |
| 350294 | 39.7  | 18    | 21.5  | 18.5  |
| 252974 | 70.7  | 62.6  | 69    | 80.7  |
| 475188 | 225.6 | 169.5 | 206.7 | 234.3 |
| 253009 | 57    | 51.7  | 50.1  | 56.1  |
| 475189 | 17.6  | 9.9   | 14.8  | 10.3  |
| 475227 | 55.2  | 56    | 58.2  | 64    |
| 475213 | 56.5  | 53.3  | 49.8  | 37.5  |
| 342801 | 3.3   | 3.1   | 3.3   | 2.4   |
| 342468 | 24.2  | 19.4  | 25.6  | 24    |
| 342459 | 13    | 10.5  | 14    | 13.3  |
| 342474 | 6.2   | 3.3   | 7.3   | 9     |
| 342631 | 5.7   | 2.5   | 6.9   | 5.5   |
| 475162 | 130.7 | 77.4  | 84.8  | 93.9  |
| 343040 | 33.4  | 24.7  | 27.1  | 35.3  |
| 475234 | 85.5  | 80.9  | 93.5  | 105.9 |
| 475408 | 8     | 8.9   | 10.7  | 11.3  |
| 475386 | 33.6  | 44.5  | 68    | 60    |
| 348145 | 100.7 | 91.5  | 101.8 | 93.7  |
| 475265 | 68.1  | 45.1  | 51.6  | 54.2  |
| 475236 | 139.3 | 140.9 | 157.7 | 163.8 |
| 475248 | 216.6 | 219.9 | 235.4 | 267.5 |
| 475247 | 14.3  | 16.2  | 15.4  | 16.6  |

|        |       |       |       |       |
|--------|-------|-------|-------|-------|
| 460740 | 13.9  | 7.5   | 8.9   | 6.8   |
| 459381 | 24.8  | 22.4  | 19.3  | 21.4  |
| 460744 | 36.5  | 18.9  | 27.4  | 23.3  |
| 475024 | 1.9   |       |       |       |
| 475037 | 38.7  | 36.4  | 43.7  | 45    |
| 271700 | 119.1 | 78.6  | 102.2 | 74.7  |
| 271689 | 90.6  | 54    | 92    | 62.3  |
| 271618 | 9.8   | 9     | 12.5  | 11.9  |
| 351530 | 24    | 14.3  | 15.7  | 9.2   |
| 475022 | 326.1 | 117.3 | 148.1 | 116.5 |
| 475662 | 1.6   | 2.3   |       | 1.8   |
| 475657 | 8.7   | 7.8   | 8.9   | 11.1  |
| 475014 | 54.3  | 37.1  | 41.3  | 47.3  |
| 462699 | 21    | 32    | 29.1  | 43.1  |
| 475015 | 269.7 | 158.5 | 168   | 172.6 |
| 271605 | 16.1  | 19.5  | 29.6  | 17.2  |
| 474983 | 70.3  | 100.1 | 110.2 | 159.5 |
| 475503 | 77.2  | 41.1  | 42.2  | 40.5  |
| 341754 | 2.8   | 2.8   | 2.5   | 2     |
| 342350 | 11.7  | 9.7   | 12.1  | 14.2  |
| 342365 | 2.8   | 6.7   | 5.2   | 2.2   |
| 475067 | 221.8 | 227.2 | 239.8 | 307.1 |
| 475506 | 116.4 | 55.2  | 65.4  | 54.9  |
| 475040 | 115.3 | 111.5 | 117.7 | 136.7 |
| 340149 | 58.8  | 47.6  | 53.9  | 43.8  |
| 475043 | 141.9 | 112.8 | 111   | 143.6 |
| 475045 | 525.1 | 400.4 | 433.1 | 531.4 |
| 475050 | 120.4 | 111   | 143.3 | 140.7 |
| 336750 | 304.2 | 147.9 | 186.5 | 161.9 |
| 475073 | 285.8 | 133.7 | 170   | 166.5 |
| 453337 | 16.8  | 14.4  | 14    | 11.9  |
| 384974 | 3.3   | 1.8   | 5.5   | 2.4   |
| 432660 | 18.9  | 11.1  | 13.5  | 15.5  |
| 385271 | 9.3   | 5.9   | 8.9   | 6.8   |
| 401193 | 15.7  | 8.4   | 12.4  | 10.3  |
| 448382 | 2.9   | 2.8   | 6.9   | 6.7   |
| 419615 |       | 2.8   | 6.8   | 2.9   |
| 401472 | 19.4  | 6.9   | 6.8   | 9     |
| 430601 | 7.5   | 6.6   | 5.1   | 6.8   |
| 371321 | 33.1  | 25.7  | 30.7  | 24.7  |
| 383829 | 18.4  | 7.5   | 6.8   | 8.2   |
| 400226 | 94.9  | 75.9  | 75.6  | 86.9  |
| 382790 | 2.6   | 1.7   | 2.1   | 2.6   |
| 427867 | 5.9   | 6.6   | 9.8   | 8     |
| 406656 | 36.8  | 26.7  | 32.5  | 30.4  |
|        |       |       |       |       |
| 400089 | 113.6 | 108.7 | 128.9 | 125.8 |
| 342949 | 1.9   | 1.7   |       | 2.3   |
| 371379 | 113.5 | 81.7  | 74.6  | 96.5  |
| 462446 | 36.5  | 28.1  | 35.4  | 42.3  |
| 454600 | 30.6  | 19.1  | 19.8  | 20    |
| 427794 | 12.7  | 15.5  | 14.7  | 13.3  |



|        |       |       |       |       |
|--------|-------|-------|-------|-------|
| 397236 | 37.3  | 32.2  | 42    | 32    |
| 317775 | 17.4  | 11.7  | 13.4  | 13.6  |
| 396892 | 11.9  | 16.2  | 20.5  | 17.1  |
| 379380 | 11.3  | 15.1  | 21.2  | 10.8  |
| 294716 | 10.1  | 3.3   | 6.8   | 5.9   |
| 343298 | 159.3 | 109.5 | 112.9 | 131   |
| 461209 | 2.2   | 1.7   | 1.6   |       |
| 439397 | 3     | 5.2   | 2.3   | 3.3   |
| 428734 | 32.9  | 27.3  | 28.3  | 28.1  |
| 446909 | 38.2  | 9.8   | 13.7  | 17.1  |
| 438050 | 8.3   | 9.1   | 7.9   | 10.1  |
| 475079 | 57.6  | 50.5  | 57.7  | 65.4  |
| 429730 | 41    | 35.5  | 30.1  | 41.4  |
|        |       |       |       |       |
| 402304 | 21.1  | 16    | 17    | 18.6  |
| 382724 | 21.7  | 16.7  | 20.2  | 20    |
| 379191 | 9.4   | 16.7  | 11.2  | 14.4  |
| 397314 | 111.1 | 100.4 | 142.4 | 106.6 |
| 340459 | 32.7  | 23.6  | 24.8  | 21.6  |
| 380401 | 18.2  | 6     | 9.9   | 5.9   |
| 457277 | 13.3  | 9     | 7.4   | 10.1  |
| 321565 | 61.3  | 52.2  | 49.5  | 55    |
| 467437 | 94.1  | 32.2  | 31.3  | 30    |
| 469280 | 10.3  | 1.8   | 6.5   | 5.7   |
| 343162 | 21.4  | 29.7  | 36.5  | 30.5  |
| 471693 | 11.2  | 5.4   | 2.9   | 2.6   |
| 376171 | 69.5  | 29.8  | 38.3  | 32.9  |
| 353501 | 12.4  | 10.1  | 10.9  | 10.2  |
| 264887 | 19.2  | 22.8  | 25.7  | 27.3  |
| 419778 | 1.8   |       |       | 2.6   |
| 441869 | 3.2   | 3.1   | 2.6   | 3.4   |
| 454027 | 26.4  | 20.9  | 24.1  | 22.8  |
| 271772 | 16.7  | 10.1  | 16.2  | 13.6  |
| 345392 | 14.7  | 10.3  | 9.4   | 13.1  |
| 292056 | 2.4   | 2.4   | 3.1   | 2.9   |
| 292654 | 11    | 9.9   | 14.8  | 5.3   |
| 312645 | 89.9  | 72.5  | 46.1  | 75.5  |
| 401094 | 9.6   | 3.1   | 5.4   | 7.6   |
| 266436 | 8.3   | 8.4   | 7.8   | 7.7   |
| 343147 | 9.8   | 9.2   | 8.7   | 7.1   |
| 320381 | 5.3   | 7.1   | 7.4   | 3     |
| 317634 | 7.4   | 10    | 9.8   | 10.9  |
| 436125 | 6.1   | 1.7   | 2     | 3.3   |
| 447928 |       | 3     | 3.3   | 6.6   |
| 310560 | 9.4   | 7.4   | 10.1  | 7.1   |
| 353748 | 1.6   |       | 1.5   |       |
| 310565 | 33.8  | 29.8  | 34.4  | 36.5  |
| 384579 | 10.6  | 5.5   | 10.2  | 8.6   |
| 385054 | 11.5  | 9.8   | 15.6  | 13.7  |
| 348898 | 2.7   | 2.3   | 2.7   | 3.5   |
| 466015 | 8.5   | 6.7   | 7.2   | 11.5  |
| 399584 | 12.1  | 6.6   | 9.6   | 8.2   |

|        |       |       |       |       |
|--------|-------|-------|-------|-------|
| 402656 | 15.9  | 13.1  | 9.2   | 11.7  |
| 443952 | 7.5   | 5.5   | 5.9   | 4.8   |
| 354101 | 1.4   | 2     | 1.6   | 1.5   |
| 443109 | 2.1   |       |       | 1.3   |
| 439161 | 2     | 1.9   | 2.5   | 3     |
| 375344 | 36.5  | 33    | 32.3  | 36.3  |
| 309823 | 23.8  | 15.1  | 13.5  | 15.2  |
| 373084 | 38.1  | 25.9  | 46.7  | 42.8  |
| 336056 | 467.2 | 379.4 | 466.3 | 394.9 |
| 379801 | 3.2   | 2.9   | 3.4   | 6.1   |
| 372294 | 26.4  | 19    | 25.4  | 23    |
| 430388 | 44.1  | 9.1   | 9.4   | 9.5   |
| 436478 | 2.9   | 5.7   | 5.5   | 2.7   |
| 467897 | 10.7  | 5.8   | 3.3   | 3.1   |
| 345381 | 90.6  | 82    | 76.7  | 87.4  |
| 408598 | 7.1   | 2.5   | 6.3   | 2.6   |
| 347633 | 128.2 | 82.5  | 118   | 123.1 |
| 403460 | 5.1   | 2.7   | 5.7   | 2.5   |
| 306602 | 48    | 38.7  | 45    | 45.6  |
| 342444 | 7     | 6.6   | 5.2   | 4.6   |
| 380658 | 18.9  | 17.3  | 21.2  | 14.6  |
| 440974 | 66.4  | 26.2  | 30.4  | 29.5  |
| 293302 | 127.6 | 116.1 | 136.1 | 139.3 |
| 353513 | 33.2  | 23.5  | 31.7  | 31.9  |
| 470107 | 103.7 | 116.4 | 123.4 | 136.7 |
| 338570 | 23.9  | 23.5  | 29.4  | 28    |
| 377657 | 28.3  | 17.2  | 17.2  | 14.6  |
| 426204 | 25.1  | 19.2  | 23.6  | 29.2  |
| 378784 | 44.4  | 41.8  | 53.9  | 46.6  |
| 409947 | 9.1   | 2.4   | 3.2   | 5.1   |
| 413234 |       | 1.6   | 1.8   | 2.3   |
| 340587 | 7     | 6.5   | 6.4   | 6.1   |
| 432678 | 2.8   | 1.6   | 1.6   |       |
| 398637 | 46.8  | 32.9  | 26.3  | 40.5  |
| 449898 | 3.3   | 3.1   | 7.1   | 6.1   |
| 429663 | 22.7  | 17.1  | 22    | 20.5  |
| 286307 | 24.1  | 8.9   | 12.8  | 11.7  |
| 331567 |       |       | 2.2   |       |
| 423791 | 26.2  | 24.8  | 30.2  | 30.4  |
| 285003 | 94.1  | 64.4  | 77.5  | 64.2  |
| 370455 | 230.2 | 221.3 | 222.3 | 236.7 |
| 370456 | 48.4  | 53.9  | 49    | 64.2  |
| 337985 | 99.1  | 70.8  | 93.9  | 80.1  |
| 381561 | 6.6   | 6.4   | 7.3   | 6.2   |
| 448308 | 2.9   | 3.1   | 8     | 6.1   |
| 377991 | 6.5   | 2.8   | 6.6   | 2.1   |
| 427174 | 37.9  | 29.6  | 25.3  | 28.7  |
| 306661 | 24.7  | 29.9  | 29.5  | 42.7  |
| 439957 | 1.6   |       | 2.5   | 1.9   |
| 400693 | 24    | 16.2  | 14.1  | 16.8  |
| 434702 | 371   | 175.9 | 197   | 197.7 |
| 400928 | 16.5  | 13.6  | 17.3  | 17.1  |

|        |       |       |       |       |
|--------|-------|-------|-------|-------|
| 401308 | 12.5  | 5.7   | 2.8   | 5.9   |
| 397683 | 33.2  | 39.4  | 37.2  | 40.3  |
| 455012 | 179.1 | 48.5  | 52.8  | 54.9  |
| 383169 | 11.2  | 10.7  | 11.1  | 9.2   |
| 384233 | 3.1   | 1.8   | 1.8   | 1.7   |
| 425754 | 55.9  | 52    | 65    | 55.4  |
| 355093 | 7.1   | 2.5   | 3.1   | 2.4   |
| 382824 | 157.1 | 99.9  | 115.8 | 120.1 |
| 406790 |       |       | 1.4   |       |
| 460718 | 82.5  | 21.1  | 27.4  | 21.8  |
| 474875 | 3     | 5.4   | 6     | 2.2   |
| 422053 | 14.7  | 11    | 12.9  | 16.5  |
| 349743 | 17.3  | 17.6  | 19.4  | 33.1  |
| 409685 | 6.1   | 2     | 2.9   | 2.5   |
| 440992 | 31.6  | 10    | 13.7  | 13.2  |
|        |       |       |       |       |
| 282267 | 100.7 | 90.3  | 36.7  | 49.4  |
| 379853 | 13.7  | 12.7  | 20.4  | 16    |
| 410087 | 9.2   | 1.5   | 5.7   | 3.1   |
| 289337 | 12.6  | 8.7   | 21.6  | 10.7  |
| 446217 |       | 2.3   | 1.9   | 2     |
| 393915 | 16.1  | 14.4  | 16.7  | 21.9  |
| 293068 | 18.7  | 16.5  | 19.8  | 24.5  |
| 318131 | 18.8  | 13.2  | 17.1  | 14.6  |
| 381734 | 5.4   | 2.4   | 6.7   | 5.8   |
| 286309 | 105.5 | 105.5 | 79.9  | 73.8  |
| 462003 | 17    | 9.7   | 15.7  | 12.3  |
| 317651 | 2.5   | 1.4   | 2.2   | 1.8   |
| 424963 | 7.1   | 5.7   | 6.2   | 3     |
| 398111 | 47.6  | 61.5  | 58.7  | 77.9  |
| 449011 | 2.2   | 7     | 6.2   | 8.6   |
| 347800 | 97.5  | 55.5  | 64.3  | 55.3  |
| 270044 | 5.1   | 2.5   | 1.7   | 3.2   |
| 427695 | 37.4  | 34.5  | 29.7  | 43.8  |
| 419145 | 6.4   | 3     | 2.2   | 2.8   |
| 406100 | 7.7   | 3.1   | 3.1   | 7.3   |
| 252917 | 66.5  | 90.2  | 108   | 103.2 |
| 437448 | 24.9  | 18.5  | 28.5  | 18.5  |
| 468234 | 24.8  | 12.6  | 13.7  | 11.4  |
| 449774 | 15.5  | 11.7  | 14.3  | 12.8  |
| 459881 | 15.9  | 14.4  | 14.4  | 15.8  |
| 395278 | 46    | 35    | 28    | 40.3  |
| 378858 | 101.9 | 79.5  | 80.4  | 90.1  |
| 455170 | 54.9  | 45.1  | 61.9  | 60.1  |
| 376001 | 76.9  | 47.8  | 45.4  | 72.3  |
| 401689 | 11    | 7.4   | 7.1   | 9.4   |
| 393683 | 35    | 29.6  | 26.9  | 33    |
| 449777 | 14.6  | 15.6  | 21.2  | 18.8  |
| 452187 | 5.8   | 1.6   | 6.6   | 6.9   |
| 465911 | 5.8   | 5.8   | 7.6   | 10.4  |
| 350310 | 43.5  | 22.8  | 24.5  | 18.9  |
|        |       |       |       |       |

|        |       |       |       |       |
|--------|-------|-------|-------|-------|
|        |       |       |       |       |
| 462571 | 49.3  | 33.4  | 39.7  | 43.3  |
| 380506 | 15.8  | 11.1  | 15.4  | 12.7  |
| 375278 | 50.1  | 30    | 26.6  | 28.6  |
| 448671 | 22.7  | 14.8  | 14    | 17.1  |
| 260939 | 51.4  | 46    | 54.7  | 52.3  |
| 284994 | 16.4  | 10.6  | 13.7  | 10.8  |
| 408530 | 2.9   |       | 2.1   | 2.6   |
| 474426 | 31.3  | 21.6  | 27.8  | 31.8  |
| 419574 |       |       |       | 1.8   |
| 337534 | 69.4  | 68    | 68.6  | 71.9  |
| 337534 | 69.4  | 68    | 68.6  | 71.9  |
| 463281 | 9.7   | 2.9   | 7.2   | 6.4   |
| 335935 | 35.6  | 33.2  | 48.1  | 38.5  |
| 263490 | 9.3   | 7     | 8.7   | 8.2   |
| 398714 | 16.9  | 13.6  | 12.7  | 14.6  |
| 347784 | 260.3 | 89.1  | 109.4 | 120.2 |
| 456297 | 60.4  | 26.5  | 55.7  | 27.3  |
| 369421 | 118.4 | 105.5 | 88.1  | 96.8  |
| 344884 | 46.2  | 32.7  | 39.4  | 36.8  |
| 445882 | 1.8   |       | 2.5   | 1.6   |
| 454891 | 55.6  | 35.1  | 41.7  | 44.3  |
| 453213 | 26.3  | 20.8  | 22.1  | 21.3  |
| 285146 | 8.1   | 10.4  | 15.9  | 14.4  |
| 345592 | 37.6  | 26.3  | 27.2  | 30.3  |
| 419344 |       |       |       | 1.5   |
| 399122 | 203.9 | 230.9 | 212.8 | 290.1 |
| 470234 | 270   | 183.5 | 187   | 218.7 |
| 260857 | 178.9 | 164.9 | 131.8 | 105.8 |
| 374660 | 55.9  | 34.4  | 43.7  | 33.4  |
| 402803 | 13.8  | 12    | 12.9  | 14.2  |
| 397287 | 5.3   | 5.3   | 9.7   | 7.4   |
| 402523 | 5.6   | 5     | 5.9   | 3.3   |
| 448190 | 26.8  | 27.3  | 37.3  | 25    |
| 396728 | 13    | 16.5  | 15.5  | 15.5  |
| 285414 | 13.3  | 10.1  | 13.4  | 10.7  |
| 347734 | 37.2  | 23    | 25.6  | 21.2  |
|        |       |       |       |       |
| 286715 | 10.7  | 9.1   | 15.3  | 10.1  |
| 377391 | 43.5  | 32.4  | 42.8  | 42.1  |
| 378043 | 18.7  | 21.1  | 20.9  | 23.8  |
| 412777 | 10.4  | 6     | 6.1   | 6.6   |
| 325218 | 6.1   | 4.4   | 8.3   | 2     |
| 394520 | 180.4 | 216   | 218.6 | 301.5 |
| 399668 | 13.3  | 12.7  | 17.6  | 13.3  |
| 310151 | 87.9  | 64.1  | 67.9  | 83.4  |
| 398711 | 38.5  | 29.5  | 31.3  | 29.1  |
| 400555 | 11.5  | 14.3  | 20.9  | 19.8  |
| 436003 | 2.5   |       | 2.2   | 7.1   |
| 282351 | 56.5  | 49.3  | 75.5  | 50.2  |
| 384973 | 14.7  | 13.7  | 17.3  | 13.7  |
| 393138 | 32.7  | 25.2  | 29.7  | 31.9  |

|        |       |       |       |       |
|--------|-------|-------|-------|-------|
| 405867 | 14.3  | 7.6   | 12.4  | 8.4   |
| 386617 | 2.9   | 2.6   | 5.9   | 2.5   |
| 397515 | 27.1  | 26.2  | 22.4  | 29.4  |
| 382402 | 12.5  | 8.9   | 12.1  | 7.6   |
| 440826 | 16    | 10.8  | 13.2  | 13.7  |
| 293150 | 1.9   | 2.3   |       | 1.8   |
| 291235 | 6.3   | 3     | 6.7   | 3     |
| 339880 | 45.8  | 23.4  | 29.2  | 24.5  |
| 308985 | 55.4  | 57.4  | 61    | 57.8  |
| 436498 | 2.9   |       | 2.2   | 2     |
| 308985 | 55.4  | 57.4  | 61    | 57.8  |
| 423875 | 19    | 22.7  | 22.6  | 22.9  |
| 414101 | 1.7   | 2.1   | 1.5   | 2.7   |
| 383821 | 11.9  | 6.5   | 6.7   | 3.3   |
| 396753 | 10.4  | 8.5   | 10.1  | 10    |
| 450018 | 23.8  | 15    | 20.2  | 22    |
| 340135 | 34.1  | 28.6  | 42.6  | 42.2  |
| 406503 | 3.3   | 2.6   | 5.7   | 1.8   |
| 402930 | 43.8  | 38.1  | 51.6  | 56.5  |
| 428445 | 9     | 7     | 9.1   | 7.4   |
| 413970 | 1.9   | 1.6   | 1.8   | 1.6   |
| 416338 | 3.2   | 2.3   | 2.7   | 2.9   |
|        |       |       |       |       |
| 292189 | 2.7   | 2.5   | 3.1   | 1.7   |
|        |       |       |       |       |
| 353408 | 16    | 9.6   | 10.6  | 12.4  |
| 400562 | 11.4  | 15.9  | 15.7  | 16.5  |
| 344321 | 38.6  | 33    | 39.2  | 38.1  |
| 430179 | 34    | 29.1  | 25.4  | 28.1  |
| 408032 | 14.5  | 13.9  | 13.5  | 15.2  |
| 381742 | 10.6  | 6.9   | 7.2   | 6.7   |
| 393673 | 92.2  | 89.1  | 76.5  | 88.2  |
| 385090 | 43.1  | 37.6  | 40.8  | 46.5  |
| 434003 | 7.8   | 7.6   | 7.2   | 7.9   |
| 271599 | 11.2  | 9.2   | 13.5  | 11.2  |
| 403908 | 5.6   | 7.4   | 5.6   | 6.7   |
| 379506 | 7.1   | 8.1   | 11    | 6.9   |
| 408919 | 2.9   | 2.4   | 1.4   | 4.8   |
| 354043 | 179.8 | 188.2 | 65.6  | 46    |
|        |       |       |       |       |
| 306081 | 85.6  | 60.6  | 75.7  | 59.7  |
| 282094 | 195.2 | 192.4 | 259.9 | 249.4 |
| 436039 | 3.1   | 1.9   | 2.5   | 3     |
| 380215 | 11.9  | 10.4  | 11.4  | 12.3  |
| 331561 | 2.5   | 2.5   |       | 2.7   |
| 397473 | 44.2  | 49.7  | 43.3  | 57.8  |
| 409254 | 132.2 | 141.2 | 180.6 | 185.6 |
| 449000 | 9.7   | 10.2  | 15.6  | 12.5  |
| 423873 | 9.5   | 11.6  | 17.8  | 15.8  |
| 429592 | 5.5   | 5.5   | 7.9   | 6     |
| 310297 | 10.3  | 13.1  | 42.1  | 27.9  |
| 419310 | 6     | 1.7   |       |       |

|        |       |       |       |       |
|--------|-------|-------|-------|-------|
| 413225 | 3.3   |       | 2.9   | 6.5   |
| 372636 | 108   | 145.4 | 135.4 | 172.3 |
| 445308 | 11.6  | 7.8   | 10    | 9.9   |
| 305576 | 40.2  | 31.9  | 31.3  | 37.2  |
| 471589 | 5.3   | 11.9  | 6.5   | 9.1   |
| 469234 | 4.9   | 5.4   | 6.1   | 3.4   |
| 336523 | 207.8 | 145.1 | 172.9 | 145.4 |
| 436917 | 1.4   | 2.5   | 1.7   | 2.5   |
| 403446 | 22.6  | 13.2  | 12.8  | 12.9  |
| 280782 | 37.1  | 32    | 43.3  | 32.5  |
| 382869 | 38.1  | 24.4  | 22.9  | 25    |
| 253035 | 14.8  | 10    | 17.3  | 16.1  |
| 448028 | 25.3  | 8.8   | 11.1  | 8.1   |
| 377528 | 90.8  | 75.3  | 86.6  | 83.8  |
|        |       |       |       |       |
| 345816 | 113.4 | 108.4 | 151   | 133.7 |
| 372477 | 73.8  | 53.7  | 51.4  | 65.3  |
| 425715 | 10.8  | 7.8   | 10.9  | 11.1  |
| 335286 | 255   | 195.8 | 204.1 | 232.3 |
| 427710 | 2.5   | 3     | 5.3   | 2.5   |
| 285151 | 43.9  | 50.6  | 61.6  | 57.8  |
| 448291 | 8.6   | 11.3  | 10.8  | 9.6   |
| 285690 | 30    | 24.5  | 27.9  | 24.8  |
| 285690 | 30    | 24.5  | 27.9  | 24.8  |
| 425689 | 37.7  | 31.6  | 43    | 35.3  |
| 412382 | 5.3   | 3.3   | 6.6   | 8.3   |
| 435638 | 12.6  | 8.8   | 7.5   | 7     |
| 434589 | 73.5  | 62    | 72.1  | 62.9  |
| 413437 | 6.6   | 7.8   | 5.8   | 6.9   |
| 439318 | 11.5  | 9.2   | 9.5   | 15.1  |
| 293564 | 2.6   | 2.2   | 2.7   | 5.6   |
| 306073 | 50.1  | 38.6  | 51.1  | 45.3  |
| 385202 | 74.8  | 57.8  | 55.4  | 51.4  |
| 316117 | 41.3  | 37.7  | 50.2  | 42    |
| 370761 | 62.1  | 49.8  | 61.2  | 61.4  |
| 281355 | 98.5  | 91.4  | 81    | 94.8  |
| 335511 | 307.1 | 341   | 489.1 | 334   |
| 428453 | 24.6  | 23.9  | 27.4  | 32.6  |
| 440522 | 2.9   | 2.4   | 2.4   | 2.5   |
| 449901 | 26.9  | 23.8  | 24    | 29.5  |
| 384212 | 13.7  | 14.3  | 12.9  | 15.4  |
| 319416 | 1.6   |       |       | 1.3   |
| 403207 | 13.3  | 12.4  | 13.9  | 13.2  |
| 400165 | 13    | 11.3  | 8.6   | 12.6  |
| 440811 | 3.2   | 3     | 5.8   | 2.8   |
| 390533 |       | 1.3   |       |       |
| 448216 | 10.4  | 7.3   | 14    | 11.2  |
| 448216 | 10.4  | 7.3   | 14    | 11.2  |
| 348313 | 21.1  | 13.2  | 13.2  | 17.7  |
| 397504 | 42.5  | 27.6  | 29.5  | 30.7  |
| 403310 | 2.3   | 2.1   | 3.2   | 3.1   |
| 383701 | 7.1   | 3.1   | 2.4   | 1.5   |

|        |       |       |       |       |
|--------|-------|-------|-------|-------|
| 310026 | 50.8  | 56.5  | 69    | 71.6  |
| 399373 | 11.9  | 6.2   | 9.2   | 7.4   |
| 285022 | 44.8  | 34.9  | 37.3  | 36.5  |
| 282234 | 33.6  | 31.7  | 30.3  | 42.2  |
| 384235 | 1.4   |       | 2.1   | 1.9   |
| 315234 | 58.8  | 62.8  | 67.8  | 73.1  |
| 284521 | 114.3 | 102.8 | 125.4 | 127.7 |
| 427279 | 6.3   | 2.4   | 2.5   | 2.5   |
| 287328 | 22.1  | 25    | 31.6  | 32    |
| 306529 | 79.6  | 91.3  | 114.1 | 107.1 |
| 334214 | 187   | 187.8 | 212.7 | 189   |
| 460644 | 23.2  | 8.5   | 12.3  | 7.3   |
| 282027 | 23.7  | 17.8  | 16.2  | 26.9  |
| 440204 | 2.4   | 2.6   | 4.3   | 3     |
| 373239 | 12.7  | 9.2   | 9.3   | 11.6  |
| 325813 | 6     |       | 2.9   | 1.9   |
| 350036 | 8.8   | 5.8   | 7.9   | 6.1   |
| 395560 | 6.5   | 2.6   | 3.4   | 7.5   |
| 394666 | 33.6  | 13.5  | 19.8  | 17.4  |
| 401593 | 22.2  | 16.9  | 19.2  | 17.5  |
| 342224 | 1.3   |       |       |       |
| 317774 | 3.5   | 1.3   |       | 1.9   |
| 452322 | 38.5  | 34.1  | 41.9  | 48.2  |
| 379376 | 7.9   | 7.7   | 17.2  | 12.1  |
| 449829 | 6.8   | 2     | 2.4   | 6.2   |
| 449829 | 6.8   | 2     | 2.4   | 6.2   |
| 403164 | 5.2   | 1.6   | 2     | 3.1   |
| 356104 | 16.2  | 12.8  | 18.7  | 18.7  |
| 365476 | 1.5   |       |       |       |
| 284477 | 6.9   | 8.3   | 7.2   | 9.3   |
| 430301 | 53.4  | 24.3  | 22.3  | 20.5  |
| 408005 | 6.4   | 6.2   | 7.2   | 4.8   |
| 306788 | 23    | 20.9  | 13.5  | 25.8  |
| 401704 | 37.3  | 16.9  | 17.6  | 16.1  |
| 446213 | 2     | 2.4   |       | 3.2   |
| 406031 | 5.6   | 2.8   | 2.6   | 2.1   |
| 281989 | 23.4  | 23    | 30.9  | 31.4  |
| 269970 | 6.6   | 3.1   | 2.9   | 2.8   |
| 335516 | 154.9 | 172.8 | 279.5 | 166.2 |
| 419953 |       | 3     | 5.6   | 1.9   |
